# Supplementary material for: Established gastric cancer cell lines transplantable into C57BL/6 mice show fibroblast growth factor receptor 4 promotion of tumor growth
Source: PubMed Central journal article supplement — Cancer Sci. 2018 Apr 15;109(5):1480–92. doi: 10.1111/cas.13569 (PMC5980194; doi:10.1111/cas.13569), 2018-04-15
Supplement: CAS-109-1480-s001.pdf [file CAS-109-1480-s001.pdf]

Table S1 Gene Expressions by Microarray in the order of YTN16/YTN2 value

| ProbeName  | ytn2_signal | YTN2_flag  | ytn3_signal | YTN3_flag  | ytn5_signal | YTN5_flag  | ytn16_signal | YTN16_flag | GeneSymbol    | YTN16/YTN2  | YTN5/YTN2  | YTN16/YTN3 | YTN5/YTN3 |
|------------|-------------|------------|-------------|------------|-------------|------------|--------------|------------|---------------|-------------|------------|------------|-----------|
| A_55_P2111 | 4.9         | Not Detect | 1559.5      | Detected   | 11738.7     | Detected   | 15756.3      | Detected   | Klhl13        | 3215.571429 | 2395.65306 | 10.1034306 | 7.5272203 |
| A_52_P4472 | 2.8         | Not Detect | 33.6        | Detected   | 1388        | Detected   | 6256.3       | Detected   | Clic6         | 2234.392857 | 495.714286 | 186.199405 | 41.309524 |
| A_51_P1139 | 4.8         | Not Detect | 386.7       | Detected   | 48946.7     | Detected   | 10159.5      | Detected   | Gkn2          | 2116.5625   | 10197.2292 | 26.2723041 | 126.57538 |
| A_55_P2095 | 3.5         | Not Detect | 1648.1      | Detected   | 554.5       | Detected   | 6302.1       | Detected   | 1600027J07Rik | 1800.6      | 158.428571 | 3.82385778 | 0.336448  |
| A_52_P5746 | 5.5         | Not Detect | 667         | Detected   | 3722.7      | Detected   | 8229.2       | Detected   | Nt5e          | 1496.218182 | 676.854545 | 12.3376312 | 5.5812594 |
| A_51_P4875 | 2.9         | Not Detect | 763.6       | Detected   | 3943.8      | Detected   | 3455.7       | Detected   | Ccdc91        | 1191.62069  | 1359.93103 | 4.52553693 | 5.1647459 |
| A_52_P2860 | 25.3        | Detected   | 529.7       | Detected   | 11507       | Detected   | 25212.8      | Detected   | Epb4.114b     | 996.5533597 | 454.822134 | 47.5982632 | 21.723617 |
| A_55_P2033 | 4.4         | Not Detect | 39.6        | Detected   | 1172.5      | Detected   | 4353.2       | Detected   | Crisp3        | 989.3636364 | 266.477273 | 109.929293 | 29.608586 |
| A_51_P1043 | 3           | Not Detect | 865.4       | Detected   | 3065.6      | Detected   | 2811.6       | Detected   | Rpp25         | 937.2       | 1021.86667 | 3.24890224 | 3.5424081 |
| A_55_P2089 | 37.3        | Detected   | 4684.2      | Detected   | 32893       | Detected   | 32315.9      | Detected   | Fkbp10        | 866.3780161 | 881.849866 | 6.8989155  | 7.0221169 |
| A_52_P5042 | 3.1         | Not Detect | 104.6       | Detected   | 243.2       | Detected   | 2405.6       | Detected   | B3galnt1      | 776         | 78.4516129 | 22.998088  | 2.3250478 |
| A_51_P3043 | 32.8        | Detected   | 256.6       | Detected   | 4331.6      | Detected   | 24654.4      | Detected   | Cpm           | 751.6585366 | 132.060976 | 96.08106   | 16.880748 |
| A_51_P3354 | 2.9         | Not Detect | 492.2       | Detected   | 67.9        | Detected   | 2096.2       | Detected   | Scin          | 722.8275862 | 23.4137931 | 4.25883787 | 0.1379521 |
| A_55_P2118 | 2.7         | Not Detect | 751.7       | Detected   | 105.1       | Detected   | 1522         | Detected   | Mgat4c        | 563.7037037 | 38.9259259 | 2.02474391 | 0.1398164 |
| A_51_P2871 | 91.6        | Detected   | 1675.2      | Detected   | 116151.1    | Detected   | 45832        | Detected   | Krt23         | 500.349345  | 1268.02511 | 27.3591213 | 69.335661 |
| A_55_P2334 | 2.9         | Not Detect | 213.1       | Detected   | 369.6       | Detected   | 1307.3       | Detected   | 9.13E+15      | 450.7931034 | 127.448276 | 6.13467855 | 1.734397  |
| A_55_P2125 | 9.6         | Not Detect | 542.6       | Detected   | 8.4         | Not Detect | 4262.1       | Compromis  | Gm5476        | 443.96875   | 0.875      | 7.85495761 | 0.015481  |
| A_66_P1051 | 3           | Not Detect | 73.8        | Detected   | 322.4       | Detected   | 1263.6       | Detected   | Bche          | 421.2       | 107.466667 | 17.1219512 | 4.3685637 |
| A_52_P3143 | 3           | Not Detect | 582         | Detected   | 52.2        | Detected   | 1263         | Detected   | Mgat4c        | 421         | 17.4       | 2.17010309 | 0.0896907 |
| A_55_P2159 | 2.8         | Not Detect | 22.6        | Detected   | 31.8        | Detected   | 1066.7       | Detected   | Rnf186        | 380.9642857 | 11.3571429 | 47.199115  | 1.4070796 |
| A_52_P2073 | 4.7         | Not Detect | 78.4        | Detected   | 897.8       | Detected   | 1709.6       | Detected   | Tmem246       | 363.7446809 | 191.021277 | 21.8061224 | 11.451531 |
| A_55_P1997 | 18.3        | Detected   | 359.2       | Detected   | 3213.3      | Detected   | 6575.1       | Detected   | Ctse          | 359.295082  | 175.590164 | 18.3048441 | 8.9457127 |
| A_51_P3156 | 8.8         | Not Detect | 964.3       | Detected   | 762.3       | Detected   | 2311.5       | Detected   | Nid2          | 262.6704545 | 86.625     | 2.3970756  | 0.7905216 |
| A_51_P5154 | 3.1         | Not Detect | 4.6         | Not Detect | 3.6         | Not Detect | 814          | Detected   | Olf15l1       | 262.5806452 | 1.16129032 | 176.956522 | 0.7826087 |
| A_55_P2017 | 2.8         | Not Detect | 15.7        | Not Detect | 4.2         | Not Detect | 701.7        | Detected   | Gprc5c        | 250.6071429 | 1.5        | 44.6942675 | 0.2675159 |
| A_52_P1951 | 2.7         | Not Detect | 3.1         | Not Detect | 3.2         | Not Detect | 667.3        | Detected   | Oosp1         | 247.1481481 | 1.18518519 | 215.258065 | 1.0322581 |
| A_55_P2078 | 3.8         | Not Detect | 3.2         | Not Detect | 3.2         | Not Detect | 899.7        | Detected   | Cacna1b       | 236.7631579 | 0.84210526 | 281.15625  | 1         |
| A_51_P1650 | 2.8         | Not Detect | 3.3         | Not Detect | 3.4         | Not Detect | 658.4        | Detected   | Pygo1         | 235.1428571 | 1.21428571 | 199.515152 | 1.030303  |
| A_51_P4504 | 32.9        | Detected   | 745.5       | Detected   | 382.3       | Detected   | 7391.6       | Detected   | Muc3          | 224.668693  | 11.6200608 | 9.91495641 | 0.5128102 |
| A_55_P2086 | 8.9         | Not Detect | 114.6       | Detected   | 38.8        | Detected   | 1948.7       | Detected   | Fa2h          | 218.9550562 | 4.35955056 | 17.004363  | 0.3385689 |
| A_51_P3751 | 2.8         | Not Detect | 26.5        | Detected   | 12.2        | Not Detect | 609.5        | Compromis  | Cd36          | 217.6785714 | 4.35714286 | 23         | 0.4603774 |
| A_55_P2054 | 3           | Not Detect | 3.6         | Not Detect | 3.6         | Not Detect | 644.6        | Detected   | Chst9         | 214.8666667 | 1.2        | 179.055556 | 1         |
| A_55_P2029 | 2.7         | Not Detect | 93.3        | Detected   | 6.9         | Not Detect | 577          | Detected   | Fry           | 213.7037037 | 2.55555556 | 6.18435155 | 0.073955  |
| A_55_P2116 | 2.8         | Not Detect | 9.5         | Not Detect | 12.2        | Not Detect | 583.7        | Detected   | Gsc2          | 208.4642857 | 4.35714286 | 61.4421053 | 1.2842105 |
| A_51_P1717 | 3.2         | Not Detect | 15.6        | Not Detect | 229.9       | Detected   | 630.5        | Detected   | Bcl11b        | 197.03125   | 71.84375   | 40.4166667 | 14.737179 |
| A_55_P1967 | 3           | Not Detect | 9.7         | Not Detect | 3.7         | Not Detect | 590.4        | Detected   | Gprn1         | 196.8       | 1.23333333 | 60.8659794 | 0.3814433 |
| A_55_P1954 | 3.1         | Not Detect | 3.8         | Not Detect | 5.4         | Not Detect | 580.1        | Detected   | Ttc25         | 187.1290323 | 1.74193548 | 152.657895 | 1.4210526 |
| A_51_P2821 | 2.8         | Not Detect | 20.5        | Detected   | 51.1        | Detected   | 483.6        | Compromis  | Adam23        | 172.7142857 | 18.25      | 23.5902439 | 2.4926829 |

|            |                 |                 |                  |                   |               |             |            |            |           |
|------------|-----------------|-----------------|------------------|-------------------|---------------|-------------|------------|------------|-----------|
| A_55_P1981 | 2.8 Not Detect  | 3.2 Not Detect  | 3.3 Not Detect   | 469.8 Detected    | Oosp2         | 167.7857143 | 1.17857143 | 146.8125   | 1.03125   |
| A_51_P4732 | 3 Not Detect    | 1246.4 Detected | 404.3 Detected   | 495 Detected      | Tspan6        | 165         | 134.766667 | 0.39714377 | 0.3243742 |
| A_55_P2018 | 11.3 Not Detect | 18.5 Detected   | 10 Not Detect    | 1835.9 Compromis  | Sowahb        | 162.4690265 | 0.88495575 | 99.2378378 | 0.5405405 |
| A_55_P1965 | 174.6 Detected  | 2859.7 Detected | 30763.9 Detected | 28002.6 Detected  | Atp9a         | 160.3814433 | 176.196449 | 9.79214603 | 10.757737 |
| A_55_P2050 | 2.7 Not Detect  | 4.7 Not Detect  | 14.3 Not Detect  | 430.6 Detected    | Gm2005        | 159.4814815 | 5.2962963  | 91.6170213 | 3.0425532 |
| A_55_P1953 | 11.9 Not Detect | 303.1 Detected  | 2830.9 Detected  | 1877.5 Detected   | Vstm2l        | 157.7731092 | 237.890756 | 6.19432531 | 9.3398218 |
| A_55_P2169 | 3 Not Detect    | 3.5 Not Detect  | 3.5 Not Detect   | 457 Detected      | AI836003      | 152.3333333 | 1.16666667 | 130.571429 | 1         |
| A_52_P4080 | 2.8 Not Detect  | 5.1 Not Detect  | 3.3 Not Detect   | 421 Detected      | Mpped2        | 150.3571429 | 1.17857143 | 82.5490196 | 0.6470588 |
| A_51_P1427 | 2.7 Not Detect  | 7.3 Not Detect  | 976.3 Detected   | 402.4 Detected    | Sulf1         | 149.037037  | 361.592593 | 55.1232877 | 133.73973 |
| A_55_P2125 | 3 Not Detect    | 3.6 Not Detect  | 18.4 Detected    | 446.7 Detected    | Evx1          | 148.9       | 6.13333333 | 124.083333 | 5.1111111 |
| A_55_P2345 | 3.3 Not Detect  | 9.9 Not Detect  | 15.2 Not Detect  | 479 Detected      | 4930458K08Rik | 145.1515152 | 4.60606061 | 48.3838384 | 1.5353535 |
| A_51_P4617 | 3 Not Detect    | 55.1 Detected   | 104.8 Detected   | 431.2 Detected    | Ppp2r2c       | 143.7333333 | 34.9333333 | 7.82577132 | 1.9019964 |
| A_55_P2124 | 3.5 Not Detect  | 264.4 Detected  | 35.4 Detected    | 499.5 Detected    | Ces2c         | 142.7142857 | 10.1142857 | 1.88918306 | 0.133888  |
| A_55_P2048 | 909.1 Detected  | 2935.7 Detected | 10270.9 Detected | 127556.4 Detected | Sprr2a2       | 140.3106369 | 11.297877  | 43.45008   | 3.4986204 |
| A_55_P2374 | 2.8 Not Detect  | 3.2 Not Detect  | 3.3 Not Detect   | 380.9 Detected    | A230001M10Rik | 136.0357143 | 1.17857143 | 119.03125  | 1.03125   |
| A_52_P1353 | 3.9 Not Detect  | 3.4 Not Detect  | 3.5 Not Detect   | 530.1 Detected    | Vmn1r183      | 135.9230769 | 0.8974359  | 155.911765 | 1.0294118 |
| A_55_P2184 | 2.8 Not Detect  | 3.3 Not Detect  | 3.3 Not Detect   | 372.5 Detected    | 2810011L19Rik | 133.0357143 | 1.17857143 | 112.878788 | 1         |
| A_51_P2741 | 20.7 Detected   | 220.9 Detected  | 407.7 Detected   | 2686.3 Compromis  | Mansc1        | 129.7729469 | 19.6956522 | 12.1607062 | 1.8456315 |
| A_52_P6707 | 3 Not Detect    | 58.5 Detected   | 27.4 Detected    | 388.5 Detected    | Lypd8         | 129.5       | 9.13333333 | 6.64102564 | 0.4683761 |
| A_55_P2091 | 11.3 Not Detect | 53.5 Detected   | 5.7 Not Detect   | 1432.7 Detected   | Sly           | 126.7876106 | 0.50442478 | 26.7794393 | 0.1065421 |
| A_55_P2406 | 2.8 Not Detect  | 3.4 Not Detect  | 3.4 Not Detect   | 353.2 Detected    | 4930511J24Rik | 126.1428571 | 1.21428571 | 103.882353 | 1         |
| A_55_P2127 | 3.2 Not Detect  | 3.8 Not Detect  | 3.8 Not Detect   | 401.9 Detected    | Pira2         | 125.59375   | 1.1875     | 105.763158 | 1         |
| A_55_P1993 | 3.1 Not Detect  | 3.8 Not Detect  | 3.8 Not Detect   | 389.2 Detected    | Gm5331        | 125.5483871 | 1.22580645 | 102.421053 | 1         |
| A_55_P1977 | 45.3 Detected   | 58.9 Detected   | 33.7 Detected    | 5638.9 Detected   | Folr1         | 124.4790287 | 0.74392936 | 95.7368421 | 0.5721562 |
| A_52_P2993 | 4.1 Not Detect  | 781.4 Detected  | 849.2 Detected   | 505.1 Detected    | Lclat1        | 123.195122  | 207.121951 | 0.64640389 | 1.0867673 |
| A_52_P6272 | 2.9 Not Detect  | 164.8 Detected  | 15.6 Not Detect  | 351.9 Detected    | Ces2b         | 121.3448276 | 5.37931034 | 2.13531553 | 0.0946602 |
| A_55_P2120 | 69.3 Detected   | 849.5 Detected  | 12802.4 Detected | 8393.1 Detected   | Fgfr4         | 121.1125541 | 184.738817 | 9.88004709 | 15.070512 |
| A_55_P1983 | 3 Not Detect    | 40 Detected     | 31.3 Detected    | 351.6 Detected    | Prss52        | 117.2       | 10.4333333 | 8.79       | 0.7825    |
| A_55_P2048 | 2.9 Not Detect  | 5.6 Not Detect  | 35.6 Detected    | 339.8 Detected    | Sprr2a2       | 117.1724138 | 12.2758621 | 60.6785714 | 6.3571429 |
| A_55_P2137 | 3.1 Not Detect  | 3.8 Not Detect  | 3.8 Not Detect   | 361.1 Detected    | Gm10620       | 116.483871  | 1.22580645 | 95.0263158 | 1         |
| A_55_P2048 | 3.1 Not Detect  | 3.6 Not Detect  | 3.6 Not Detect   | 359.9 Detected    | Olf1294       | 116.0967742 | 1.16129032 | 99.9722222 | 1         |
| A_66_P1195 | 3.1 Not Detect  | 5.3 Not Detect  | 3.2 Not Detect   | 358.1 Detected    | Olf1607       | 115.516129  | 1.03225806 | 67.5660377 | 0.6037736 |
| A_55_P1977 | 11.9 Not Detect | 62.7 Detected   | 82.7 Detected    | 1341.6 Detected   | Wdr65         | 112.7394958 | 6.94957983 | 21.3971292 | 1.3189793 |
| A_55_P2117 | 3.5 Not Detect  | 3.5 Not Detect  | 3.5 Not Detect   | 392.1 Detected    | Gm8098        | 112.0285714 | 1          | 112.028571 | 1         |
| A_55_P2005 | 65.4 Detected   | 891 Detected    | 5153.3 Detected  | 7197.4 Detected   | Celf2         | 110.0519878 | 78.7966361 | 8.07789001 | 5.7837262 |
| A_55_P2034 | 38.5 Detected   | 1117.3 Detected | 58.1 Detected    | 4228.1 Detected   | Serp112       | 109.8207792 | 1.50909091 | 3.78421194 | 0.0520004 |
| A_55_P2288 | 3 Not Detect    | 3.6 Not Detect  | 3.6 Not Detect   | 327.2 Detected    | Gpr112        | 109.0666667 | 1.2        | 90.8888889 | 1         |
| A_51_P1626 | 2.7 Not Detect  | 3 Not Detect    | 3.1 Not Detect   | 292.5 Detected    | Folr2         | 108.3333333 | 1.14814815 | 97.5       | 1.0333333 |
| A_52_P3989 | 3.1 Not Detect  | 3.2 Not Detect  | 3.3 Not Detect   | 335.7 Detected    | Stfa211       | 108.2903226 | 1.06451613 | 104.90625  | 1.03125   |
| A_51_P1824 | 26.9 Detected   | 336.4 Detected  | 2037.3 Detected  | 2880.6 Detected   | Celf2         | 107.0855019 | 75.7360595 | 8.56302021 | 6.0561831 |

|            |                 |                 |                 |                  |               |             |            |            |           |
|------------|-----------------|-----------------|-----------------|------------------|---------------|-------------|------------|------------|-----------|
| A_55_P2185 | 3 Not Detect    | 3.6 Not Detect  | 7.1 Not Detect  | 319.9 Detected   | Slco1c1       | 106.6333333 | 2.36666667 | 88.8611111 | 1.9722222 |
| A_55_P2092 | 4 Not Detect    | 3.8 Not Detect  | 3.8 Not Detect  | 425.9 Detected   | Mptx1         | 106.475     | 0.95       | 112.078947 | 1         |
| A_55_P2097 | 16.7 Detected   | 13.5 Not Detect | 6.7 Not Detect  | 1776.1 Compromis | 9030622O22Rik | 106.3532934 | 0.4011976  | 131.562963 | 0.4962963 |
| A_55_P2038 | 7.7 Not Detect  | 127.7 Detected  | 298.2 Detected  | 815.5 Detected   | Cttnbp2       | 105.9090909 | 38.7272727 | 6.38606108 | 2.3351605 |
| A_55_P2074 | 3 Not Detect    | 3.5 Not Detect  | 3.5 Not Detect  | 315.8 Detected   | Gm10573       | 105.2666667 | 1.16666667 | 90.2285714 | 1         |
| A_55_P2247 | 5.2 Not Detect  | 3.8 Not Detect  | 5.1 Not Detect  | 541.3 Detected   | Izumo2        | 104.0961538 | 0.98076923 | 142.447368 | 1.3421053 |
| A_51_P1467 | 12.1 Not Detect | 31.7 Detected   | 3.6 Not Detect  | 1252 Compromis   | Pcdhb20       | 103.4710744 | 0.29752066 | 39.4952681 | 0.1135647 |
| A_51_P1536 | 40.6 Detected   | 3.6 Not Detect  | 2468.6 Detected | 4134.6 Detected  | Lrrc26        | 101.8374384 | 60.8029557 | 1148.5     | 685.72222 |
| A_55_P2000 | 2.9 Not Detect  | 18.2 Detected   | 22.3 Detected   | 294.8 Detected   | Nrip3         | 101.6551724 | 7.68965517 | 16.1978022 | 1.2252747 |
| A_55_P2003 | 9.1 Not Detect  | 150.5 Detected  | 796.8 Detected  | 923.4 Detected   | Igsf5         | 101.4725275 | 87.5604396 | 6.13554817 | 5.2943522 |
| A_55_P1980 | 3 Not Detect    | 3.6 Not Detect  | 7.2 Not Detect  | 300.3 Detected   | Gm8359        | 100.1       | 2.4        | 83.4166667 | 2         |
| A_55_P2221 | 9.8 Not Detect  | 11.8 Not Detect | 6.1 Not Detect  | 970.4 Detected   | A930030B08Rik | 99.02040816 | 0.62244898 | 82.2372881 | 0.5169492 |
| A_55_P2038 | 3 Not Detect    | 3.6 Not Detect  | 3.5 Not Detect  | 295.2 Detected   | Prkd3         | 98.4        | 1.16666667 | 82         | 0.9722222 |
| A_55_P2205 | 2.9 Not Detect  | 36 Detected     | 30.6 Detected   | 285.1 Detected   | 5830415G21Rik | 98.31034483 | 10.5517241 | 7.91944444 | 0.85      |
| A_55_P2147 | 2.7 Not Detect  | 5 Not Detect    | 3.1 Not Detect  | 264 Detected     | Sytl4         | 97.7777778  | 1.14814815 | 52.8       | 0.62      |
| A_51_P4878 | 2.8 Not Detect  | 3 Not Detect    | 3285.6 Detected | 273.4 Detected   | Fabp1         | 97.64285714 | 1173.42857 | 91.1333333 | 1095.2    |
| A_55_P2026 | 4.5 Not Detect  | 43.5 Detected   | 30 Detected     | 437.9 Detected   | Syne1         | 97.31111111 | 6.66666667 | 10.0666667 | 0.6896552 |
| A_51_P1438 | 3.5 Not Detect  | 23.2 Detected   | 64.3 Detected   | 334.8 Detected   | Steap4        | 95.65714286 | 18.3714286 | 14.4310345 | 2.7715517 |
| A_55_P2115 | 3 Not Detect    | 15.3 Not Detect | 3.7 Not Detect  | 282 Detected     | Rbmy          | 94          | 1.23333333 | 18.4313725 | 0.2418301 |
| A_55_P2003 | 32.7 Detected   | 571.1 Detected  | 2836.4 Detected | 3028.4 Detected  | Igsf5         | 92.6116208  | 86.7400612 | 5.30274908 | 4.9665558 |
| A_52_P5124 | 16.3 Detected   | 362.4 Detected  | 431.1 Detected  | 1508.1 Detected  | 2510049J12Rik | 92.52147239 | 26.4478528 | 4.16142384 | 1.1895695 |
| A_55_P2090 | 2.9 Not Detect  | 7.4 Not Detect  | 155.9 Detected  | 267.7 Detected   | Gm5126        | 92.31034483 | 53.7586207 | 36.1756757 | 21.067568 |
| A_55_P2075 | 34.1 Detected   | 300 Detected    | 148.4 Detected  | 3087 Detected    | Muc3          | 90.52785924 | 4.35190616 | 10.29      | 0.4946667 |
| A_65_P1101 | 29.2 Detected   | 48.8 Detected   | 748 Detected    | 2616.4 Detected  | Gcnt3         | 89.60273973 | 25.6164384 | 53.6147541 | 15.327869 |
| A_55_P1965 | 3.7 Not Detect  | 3.6 Not Detect  | 5.8 Not Detect  | 328.3 Detected   | Olf354        | 88.72972973 | 1.56756757 | 91.1944444 | 1.6111111 |
| A_51_P4823 | 2.6 Not Detect  | 2.9 Not Detect  | 3.5 Not Detect  | 227.6 Detected   | Vmn1r210      | 87.53846154 | 1.34615385 | 78.4827586 | 1.2068966 |
| A_51_P2971 | 20 Detected     | 169.3 Detected  | 2085.3 Detected | 1739.7 Detected  | Ucp2          | 86.985      | 104.265    | 10.2758417 | 12.317188 |
| A_51_P2925 | 2.9 Not Detect  | 3.4 Not Detect  | 5.1 Not Detect  | 251.7 Detected   | Chdh          | 86.79310345 | 1.75862069 | 74.0294118 | 1.5       |
| A_52_P3792 | 44.1 Detected   | 1387.3 Detected | 2975.4 Detected | 3826.3 Detected  | Enpp3         | 86.76417234 | 67.4693878 | 2.75809126 | 2.1447416 |
| A_52_P6538 | 3 Not Detect    | 5.1 Not Detect  | 19 Detected     | 259.6 Detected   | Keg1          | 86.53333333 | 6.33333333 | 50.9019608 | 3.7254902 |
| A_51_P3637 | 32.7 Detected   | 594 Detected    | 480.1 Detected  | 2781.4 Detected  | Irf6          | 85.05810398 | 14.6819572 | 4.68249158 | 0.8082492 |
| A_55_P2031 | 3 Not Detect    | 3.7 Not Detect  | 3.7 Not Detect  | 252.8 Detected   | Npas3         | 84.26666667 | 1.23333333 | 68.3243243 | 1         |
| A_55_P2262 | 3 Not Detect    | 3.4 Not Detect  | 3.4 Not Detect  | 251.8 Detected   | 4930429F24Rik | 83.93333333 | 1.13333333 | 74.0588235 | 1         |
| A_55_P2145 | 3.1 Not Detect  | 3.8 Not Detect  | 3.7 Not Detect  | 258.8 Detected   | Krt84         | 83.48387097 | 1.19354839 | 68.1052632 | 0.9736842 |
| A_66_P1308 | 2.7 Not Detect  | 3.1 Not Detect  | 3.1 Not Detect  | 225 Detected     | 4930567H17Rik | 83.33333333 | 1.14814815 | 72.5806452 | 1         |
| A_55_P1989 | 3.2 Not Detect  | 247.8 Detected  | 764.3 Detected  | 266.1 Detected   | Ly9           | 83.15625    | 238.84375  | 1.07384988 | 3.0843422 |
| A_55_P1978 | 3 Not Detect    | 3.4 Not Detect  | 3.5 Not Detect  | 247.8 Detected   | AF251705      | 82.6        | 1.16666667 | 72.8823529 | 1.0294118 |
| A_55_P1975 | 16.1 Detected   | 19.4 Detected   | 17.5 Detected   | 1321.6 Detected  | Gm20736       | 82.08695652 | 1.08695652 | 68.1237113 | 0.9020619 |
| A_55_P2167 | 2.8 Not Detect  | 3.3 Not Detect  | 3.3 Not Detect  | 227.7 Detected   | Scgb1b24      | 81.32142857 | 1.17857143 | 69         | 1         |
| A_66_P1082 | 23.3 Detected   | 207.5 Detected  | 2354.7 Detected | 1881.9 Detected  | Ucp3          | 80.76824034 | 101.060086 | 9.06939759 | 11.347952 |

|            |                 |                 |                 |                 |               |             |            |            |           |
|------------|-----------------|-----------------|-----------------|-----------------|---------------|-------------|------------|------------|-----------|
| A_55_P1981 | 3 Not Detect    | 4.1 Not Detect  | 3.6 Not Detect  | 238.5 Detected  | Gm20795       | 79.5        | 1.2        | 58.1707317 | 0.8780488 |
| A_52_P2829 | 2.8 Not Detect  | 3.3 Not Detect  | 3.3 Not Detect  | 221.7 Detected  | Ces1b         | 79.17857143 | 1.17857143 | 67.1818182 | 1         |
| A_55_P2149 | 2.7 Not Detect  | 3 Not Detect    | 3.1 Not Detect  | 212.1 Detected  | Gm6978        | 78.55555556 | 1.14814815 | 70.7       | 1.0333333 |
| A_51_P5110 | 2.7 Not Detect  | 57.9 Detected   | 3.1 Not Detect  | 210.9 Detected  | Fzd9          | 78.11111111 | 1.14814815 | 3.64248705 | 0.0535406 |
| A_51_P3031 | 8.7 Not Detect  | 178.3 Detected  | 151 Detected    | 676.6 Detected  | Arg1          | 77.77011494 | 17.3563218 | 3.79472799 | 0.8468873 |
| A_65_P1019 | 101.1 Detected  | 1239.3 Detected | 273.1 Detected  | 7828.8 Detected | Myl7          | 77.43620178 | 2.70128586 | 6.3171145  | 0.2203663 |
| A_52_P1915 | 5.1 Not Detect  | 15.8 Detected   | 217.1 Detected  | 394.4 Detected  | Plcl1         | 77.33333333 | 42.5686275 | 24.9620253 | 13.740506 |
| A_55_P2037 | 2.8 Not Detect  | 3.3 Not Detect  | 3.3 Not Detect  | 214.7 Detected  | 1190003K10Rik | 76.67857143 | 1.17857143 | 65.0606061 | 1         |
| A_55_P2033 | 2.9 Not Detect  | 3.4 Not Detect  | 7.6 Not Detect  | 222.3 Detected  | Olf1335       | 76.65517241 | 2.62068966 | 65.3823529 | 2.2352941 |
| A_52_P3197 | 2.9 Not Detect  | 3.5 Not Detect  | 3.5 Not Detect  | 222.3 Detected  | Kcnp4         | 76.65517241 | 1.20689655 | 63.5142857 | 1         |
| A_52_P5265 | 4.1 Not Detect  | 3.4 Not Detect  | 3.5 Not Detect  | 311.6 Detected  | E230016M11Rik | 76          | 0.85365854 | 91.6470588 | 1.0294118 |
| A_52_P5384 | 12.1 Not Detect | 149.5 Detected  | 894.3 Detected  | 909 Detected    | Spats2l       | 75.12396694 | 73.9090909 | 6.08026756 | 5.9819398 |
| A_51_P2774 | 3.1 Not Detect  | 23.8 Detected   | 3.7 Not Detect  | 232.7 Detected  | Ccdc3         | 75.06451613 | 1.19354839 | 9.77731092 | 0.1554622 |
| A_55_P1961 | 46.9 Detected   | 55.4 Detected   | 1150.9 Detected | 3458.4 Detected | Otop3         | 73.73987207 | 24.5394456 | 62.4259928 | 20.774368 |
| A_55_P2052 | 6.9 Not Detect  | 59.6 Detected   | 441.8 Detected  | 505.7 Detected  | Ly6g6d        | 73.28985507 | 64.0289855 | 8.48489933 | 7.4127517 |
| A_55_P2064 | 3 Not Detect    | 3.6 Not Detect  | 3.6 Not Detect  | 219.6 Detected  | Acvr1c        | 73.2        | 1.2        | 61         | 1         |
| A_66_P1350 | 3.1 Not Detect  | 7.1 Not Detect  | 3.7 Not Detect  | 224.8 Detected  | Tex21         | 72.51612903 | 1.19354839 | 31.6619718 | 0.5211268 |
| A_52_P2882 | 2.8 Not Detect  | 3.2 Not Detect  | 3.3 Not Detect  | 201.8 Detected  | Mrgprb1       | 72.07142857 | 1.17857143 | 63.0625    | 1.03125   |
| A_52_P6484 | 2.7 Not Detect  | 3.1 Not Detect  | 3.9 Not Detect  | 193.4 Detected  | Tex13         | 71.62962963 | 1.44444444 | 62.3870968 | 1.2580645 |
| A_51_P3976 | 129.1 Detected  | 3297.8 Detected | 949.4 Detected  | 9165.7 Detected | Pcsk9         | 70.99690163 | 7.35398916 | 2.77933774 | 0.2878889 |
| A_55_P2079 | 3.2 Not Detect  | 3.9 Not Detect  | 31.4 Detected   | 225.1 Detected  | Pira7         | 70.34375    | 9.8125     | 57.7179487 | 8.0512821 |
| A_52_P2248 | 9.4 Not Detect  | 103.6 Detected  | 32.4 Detected   | 656 Detected    | 4930529M08Rik | 69.78723404 | 3.44680851 | 6.33204633 | 0.3127413 |
| A_55_P2153 | 22 Detected     | 186.4 Detected  | 740.3 Detected  | 1519.3 Detected | A630081J09Rik | 69.05909091 | 33.65      | 8.15075107 | 3.9715665 |
| A_55_P1966 | 2.7 Not Detect  | 3.1 Not Detect  | 3.2 Not Detect  | 186 Detected    | Serpina3i     | 68.88888889 | 1.18518519 | 60         | 1.0322581 |
| A_51_P3298 | 3.1 Not Detect  | 16.6 Not Detect | 9.5 Not Detect  | 212.4 Detected  | Reg1          | 68.51612903 | 3.06451613 | 12.7951807 | 0.5722892 |
| A_55_P2048 | 2.9 Not Detect  | 328 Detected    | 3.5 Not Detect  | 197.4 Detected  | Mgarp         | 68.06896552 | 1.20689655 | 0.60182927 | 0.0106707 |
| A_55_P2084 | 2.7 Not Detect  | 3.1 Not Detect  | 3.2 Not Detect  | 182.9 Detected  | Klk15         | 67.74074074 | 1.18518519 | 59         | 1.0322581 |
| A_55_P1961 | 3 Not Detect    | 8.6 Not Detect  | 5.6 Not Detect  | 201.3 Detected  | Nlgn3         | 67.1        | 1.86666667 | 23.4069767 | 0.6511628 |
| A_66_P1323 | 2.8 Not Detect  | 3.5 Not Detect  | 3.3 Not Detect  | 186.9 Detected  | Olf1815       | 66.75       | 1.17857143 | 53.4       | 0.9428571 |
| A_55_P1998 | 3.1 Not Detect  | 10.3 Not Detect | 3.8 Not Detect  | 206.8 Detected  | Gm20877       | 66.70967742 | 1.22580645 | 20.0776699 | 0.368932  |
| A_55_P2113 | 3 Not Detect    | 3.6 Not Detect  | 3.6 Not Detect  | 199.7 Detected  | Zfp583        | 66.56666667 | 1.2        | 55.4722222 | 1         |
| A_51_P3757 | 2.8 Not Detect  | 104.9 Detected  | 3.3 Not Detect  | 185.8 Detected  | Ptchd1        | 66.35714286 | 1.17857143 | 1.77121068 | 0.0314585 |
| A_66_P1013 | 3 Not Detect    | 3.6 Not Detect  | 3.5 Not Detect  | 198.4 Detected  | A530001N23Rik | 66.13333333 | 1.16666667 | 55.1111111 | 0.9722222 |
| A_66_P1407 | 2.7 Not Detect  | 3 Not Detect    | 3.1 Not Detect  | 177.3 Detected  | Gm10445       | 65.66666667 | 1.14814815 | 59.1       | 1.0333333 |
| A_52_P3183 | 3.6 Not Detect  | 122.1 Detected  | 16.1 Not Detect | 234.7 Detected  | Ces2c         | 65.19444444 | 4.47222222 | 1.92219492 | 0.1318591 |
| A_55_P2058 | 3.1 Not Detect  | 3.6 Not Detect  | 311.1 Detected  | 201.5 Detected  | Cyp2c68       | 65          | 100.354839 | 55.9722222 | 86.416667 |
| A_66_P1023 | 2.7 Not Detect  | 3.1 Not Detect  | 3.2 Not Detect  | 174.8 Detected  | Gm5099        | 64.74074074 | 1.18518519 | 56.3870968 | 1.0322581 |
| A_51_P1430 | 36.5 Detected   | 627.8 Detected  | 2584.3 Detected | 2348.7 Detected | Eps8l3        | 64.34794521 | 70.8027397 | 3.7411596  | 4.1164384 |
| A_52_P2907 | 3.1 Not Detect  | 12.7 Not Detect | 7.6 Not Detect  | 196.6 Detected  | BC016579      | 63.41935484 | 2.4516129  | 15.480315  | 0.5984252 |
| A_55_P2051 | 2.9 Not Detect  | 3.5 Not Detect  | 3.5 Not Detect  | 183.9 Detected  | Tctex1d1      | 63.4137931  | 1.20689655 | 52.5428571 | 1         |

|            |                 |                |                 |                  |               |             |            |            |           |
|------------|-----------------|----------------|-----------------|------------------|---------------|-------------|------------|------------|-----------|
| A_55_P2073 | 3.1 Not Detect  | 3.8 Not Detect | 3.7 Not Detect  | 196.4 Detected   | Gm7759        | 63.35483871 | 1.19354839 | 51.6842105 | 0.9736842 |
| A_55_P2002 | 12.1 Not Detect | 161.5 Detected | 145 Detected    | 765.7 Detected   | Fhl1          | 63.28099174 | 11.9834711 | 4.74117647 | 0.8978328 |
| A_51_P2719 | 3.1 Not Detect  | 174 Detected   | 17 Not Detect   | 193.4 Detected   | Tmem45b       | 62.38709677 | 5.48387097 | 1.11149425 | 0.0977011 |
| A_52_P9252 | 2.8 Not Detect  | 3.3 Not Detect | 53.6 Detected   | 173.8 Detected   | Bcl11b        | 62.07142857 | 19.1428571 | 52.6666667 | 16.242424 |
| A_55_P2078 | 29.1 Detected   | 188.3 Detected | 1142.5 Detected | 1795.6 Detected  | Mcoln2        | 61.70446735 | 39.2611684 | 9.53584705 | 6.0674456 |
| A_55_P2249 | 3.6 Not Detect  | 4.5 Not Detect | 3.7 Not Detect  | 221.8 Detected   | BC001981      | 61.61111111 | 1.02777778 | 49.2888889 | 0.8222222 |
| A_55_P2058 | 2.7 Not Detect  | 20.7 Detected  | 15.9 Detected   | 164.8 Detected   | Zfyve28       | 61.03703704 | 5.88888889 | 7.96135266 | 0.7681159 |
| A_51_P1203 | 2.9 Not Detect  | 3.4 Not Detect | 3.4 Not Detect  | 177 Detected     | Snx31         | 61.03448276 | 1.17241379 | 52.0588235 | 1         |
| A_55_P2079 | 2.9 Not Detect  | 3.3 Not Detect | 24.3 Detected   | 175.2 Detected   | Lilra6        | 60.4137931  | 8.37931034 | 53.0909091 | 7.3636364 |
| A_51_P4739 | 25.2 Detected   | 305.7 Detected | 2772.1 Detected | 1522.1 Detected  | Arhgef26      | 60.40079365 | 110.003968 | 4.97906444 | 9.0680406 |
| A_55_P2175 | 21.5 Detected   | 53.7 Detected  | 184.1 Detected  | 1288.8 Compromis | Gm10522       | 59.94418605 | 8.5627907  | 24         | 3.4283054 |
| A_55_P2161 | 106 Detected    | 90.5 Detected  | 4935.6 Detected | 6307.9 Detected  | Cyp2c65       | 59.50849057 | 46.5622642 | 69.7005525 | 54.537017 |
| A_55_P2036 | 2.8 Not Detect  | 3.2 Not Detect | 3.2 Not Detect  | 166.3 Detected   | 9230113P08Rik | 59.39285714 | 1.14285714 | 51.96875   | 1         |
| A_52_P3570 | 4.9 Not Detect  | 78.4 Detected  | 308.4 Detected  | 290.6 Detected   | Ccdc91        | 59.30612245 | 62.9387755 | 3.70663265 | 3.9336735 |
| A_52_P3319 | 3.2 Not Detect  | 3.3 Not Detect | 3.4 Not Detect  | 187.9 Detected   | Zp2           | 58.71875    | 1.0625     | 56.9393939 | 1.030303  |
| A_51_P1740 | 9.8 Not Detect  | 21.8 Detected  | 1124.9 Detected | 573.4 Detected   | Zdhhc14       | 58.51020408 | 114.785714 | 26.3027523 | 51.600917 |
| A_55_P2087 | 3 Not Detect    | 3.7 Not Detect | 123.6 Detected  | 175.4 Detected   | Hpcal4        | 58.46666667 | 41.2       | 47.4054054 | 33.405405 |
| A_55_P2039 | 3 Not Detect    | 3.5 Not Detect | 3.5 Not Detect  | 174.4 Detected   | Gpr35         | 58.13333333 | 1.16666667 | 49.8285714 | 1         |
| A_55_P1974 | 2.6 Not Detect  | 3 Not Detect   | 4 Not Detect    | 151 Detected     | Pyhin1        | 58.07692308 | 1.53846154 | 50.3333333 | 1.3333333 |
| A_55_P2042 | 3.2 Not Detect  | 42.3 Detected  | 3.8 Not Detect  | 185.3 Detected   | Rftn1         | 57.90625    | 1.1875     | 4.38061466 | 0.0898345 |
| A_55_P2097 | 3.8 Not Detect  | 24.4 Detected  | 116.9 Detected  | 220 Detected     | Fam46a        | 57.89473684 | 30.7631579 | 9.01639344 | 4.7909836 |
| A_52_P1809 | 2.7 Not Detect  | 3.1 Not Detect | 3.2 Not Detect  | 155.2 Detected   | Kcnq2         | 57.48148148 | 1.18518519 | 50.0645161 | 1.0322581 |
| A_55_P2029 | 3 Not Detect    | 3.6 Not Detect | 3.6 Not Detect  | 171 Detected     | Glt6d1        | 57          | 1.2        | 47.5       | 1         |
| A_55_P2091 | 3.3 Not Detect  | 3.8 Not Detect | 7.2 Not Detect  | 187.5 Detected   | Dppa3         | 56.81818182 | 2.18181818 | 49.3421053 | 1.8947368 |
| A_55_P2185 | 2.8 Not Detect  | 3.2 Not Detect | 3.2 Not Detect  | 158.7 Detected   | Tmem28        | 56.67857143 | 1.14285714 | 49.59375   | 1         |
| A_55_P2065 | 3.7 Not Detect  | 3.4 Not Detect | 3.5 Not Detect  | 207.7 Detected   | 14-Sep        | 56.13513514 | 0.94594595 | 61.0882353 | 1.0294118 |
| A_55_P2194 | 2.8 Not Detect  | 3.2 Not Detect | 3.3 Not Detect  | 156.9 Detected   | 1700126A01Rik | 56.03571429 | 1.17857143 | 49.03125   | 1.03125   |
| A_55_P2005 | 15 Not Detect   | 114.2 Detected | 601.1 Detected  | 834.7 Detected   | Celf2         | 55.64666667 | 40.0733333 | 7.30910683 | 5.2635727 |
| A_55_P2127 | 3.2 Not Detect  | 3.8 Not Detect | 3.8 Not Detect  | 177.9 Detected   | 4931422A03Rik | 55.59375    | 1.1875     | 46.8157895 | 1         |
| A_55_P2249 | 38.8 Detected   | 687.9 Detected | 268.7 Detected  | 2128.3 Detected  | Sema6a        | 54.85309278 | 6.92525773 | 3.093909   | 0.3906091 |
| A_55_P2110 | 3 Not Detect    | 3.7 Not Detect | 3.6 Not Detect  | 163.8 Detected   | Olf1r116      | 54.6        | 1.2        | 44.2702703 | 0.972973  |
| A_55_P1974 | 70.4 Detected   | 556.1 Detected | 1940.5 Detected | 3747.7 Detected  | Entpd2        | 53.234375   | 27.5639205 | 6.73925553 | 3.4894803 |
| A_51_P3188 | 32.4 Detected   | 43.1 Detected  | 44 Detected     | 1721 Detected    | Syt10         | 53.11728395 | 1.35802469 | 39.9303944 | 1.0208817 |
| A_52_P2874 | 2.7 Not Detect  | 3.1 Not Detect | 3.2 Not Detect  | 143.4 Detected   | Scgn          | 53.11111111 | 1.18518519 | 46.2580645 | 1.0322581 |
| A_55_P2015 | 3.1 Not Detect  | 7.4 Not Detect | 3.7 Not Detect  | 164.6 Detected   | Glt1d1        | 53.09677419 | 1.19354839 | 22.2432432 | 0.5       |
| A_55_P2426 | 3 Not Detect    | 3.6 Not Detect | 3.6 Not Detect  | 158.5 Detected   | Gprin3        | 52.83333333 | 1.2        | 44.0277778 | 1         |
| A_52_P1583 | 3.1 Not Detect  | 3.8 Not Detect | 3.8 Not Detect  | 163.7 Detected   | Cpa4          | 52.80645161 | 1.22580645 | 43.0789474 | 1         |
| A_55_P2047 | 71.4 Detected   | 360.9 Detected | 2808.6 Detected | 3756.5 Detected  | Fcho1         | 52.61204482 | 39.3361345 | 10.4087005 | 7.7822111 |
| A_55_P1959 | 2.7 Not Detect  | 50.9 Detected  | 84.8 Detected   | 140.7 Detected   | Usp51         | 52.11111111 | 31.4074074 | 2.76424361 | 1.6660118 |
| A_51_P4903 | 6.3 Not Detect  | 3.9 Not Detect | 3.8 Not Detect  | 327.9 Detected   | Tmem190       | 52.04761905 | 0.6031746  | 84.0769231 | 0.974359  |

|            |                 |                 |                 |                  |               |             |            |            |           |
|------------|-----------------|-----------------|-----------------|------------------|---------------|-------------|------------|------------|-----------|
| A_52_P2068 | 18.8 Detected   | 74.9 Detected   | 106.3 Detected  | 976.6 Compromis  | Klf8          | 51.94680851 | 5.65425532 | 13.0387183 | 1.4192256 |
| A_55_P2127 | 61.5 Detected   | 951.3 Detected  | 1396.4 Detected | 3149 Detected    | Palm3         | 51.20325203 | 22.7056911 | 3.31020709 | 1.4678861 |
| A_51_P1881 | 7.2 Not Detect  | 148.7 Detected  | 319.7 Detected  | 368 Detected     | Gca           | 51.11111111 | 44.4027778 | 2.47478144 | 2.1499664 |
| A_51_P2327 | 36 Detected     | 32 Detected     | 3508.3 Detected | 1836.3 Detected  | Plxnb3        | 51.00833333 | 97.4527778 | 57.384375  | 109.63438 |
| A_55_P1995 | 53.3 Detected   | 330.5 Detected  | 1013.6 Detected | 2703.7 Detected  | Tmem139       | 50.7260788  | 19.0168856 | 8.1806354  | 3.0668684 |
| A_55_P2288 | 4.6 Not Detect  | 5.4 Not Detect  | 174 Detected    | 233.1 Detected   | Gucy1a2       | 50.67391304 | 37.826087  | 43.1666667 | 32.222222 |
| A_51_P2822 | 68.8 Detected   | 1682.2 Detected | 3826.4 Detected | 3480.9 Detected  | As3mt         | 50.59447674 | 55.6162791 | 2.06925455 | 2.2746404 |
| A_55_P2237 | 2.9 Not Detect  | 3.4 Not Detect  | 3.5 Not Detect  | 146.4 Detected   | A930015G24Rik | 50.48275862 | 1.20689655 | 43.0588235 | 1.0294118 |
| A_55_P2150 | 2.7 Not Detect  | 3 Not Detect    | 3 Not Detect    | 136.1 Detected   | Cst1l         | 50.40740741 | 1.11111111 | 45.3666667 | 1         |
| A_55_P2009 | 3.5 Not Detect  | 5.5 Not Detect  | 3 Not Detect    | 175.9 Detected   | Pex5l         | 50.25714286 | 0.85714286 | 31.9818182 | 0.5454545 |
| A_51_P4711 | 176.9 Detected  | 145.3 Detected  | 6902.7 Detected | 8843.5 Detected  | Cyp2c66       | 49.99152063 | 39.0203505 | 60.8637302 | 47.506538 |
| A_55_P2149 | 3.1 Not Detect  | 6.9 Not Detect  | 13.9 Not Detect | 154.8 Detected   | Ptchd4        | 49.93548387 | 4.48387097 | 22.4347826 | 2.0144928 |
| A_52_P3549 | 3 Not Detect    | 3.7 Not Detect  | 3.6 Not Detect  | 149 Detected     | Ric3          | 49.66666667 | 1.2        | 40.2702703 | 0.972973  |
| A_55_P2111 | 3 Not Detect    | 3.6 Not Detect  | 3.5 Not Detect  | 148.6 Detected   | Olfir550      | 49.53333333 | 1.16666667 | 41.2777778 | 0.9722222 |
| A_51_P2608 | 9.2 Not Detect  | 75.1 Detected   | 219.2 Detected  | 454 Detected     | Cntnap2       | 49.34782609 | 23.826087  | 6.04527297 | 2.918775  |
| A_55_P2392 | 2.8 Not Detect  | 3.2 Not Detect  | 3.2 Not Detect  | 136.7 Detected   | Slc1a2        | 48.82142857 | 1.14285714 | 42.71875   | 1         |
| A_52_P5282 | 2.9 Not Detect  | 3.4 Not Detect  | 3.4 Not Detect  | 140.5 Detected   | Rp11l         | 48.44827586 | 1.17241379 | 41.3235294 | 1         |
| A_51_P2728 | 46.9 Detected   | 174 Detected    | 1312.8 Detected | 2267.2 Detected  | Fam46a        | 48.34115139 | 27.9914712 | 13.0298851 | 7.5448276 |
| A_55_P1984 | 3.1 Not Detect  | 3.8 Not Detect  | 3.8 Not Detect  | 149.6 Detected   | Gabre         | 48.25806452 | 1.22580645 | 39.3684211 | 1         |
| A_55_P2005 | 3.1 Not Detect  | 3.7 Not Detect  | 3.8 Not Detect  | 148.3 Detected   | Olfir876      | 47.83870968 | 1.22580645 | 40.0810811 | 1.027027  |
| A_52_P3702 | 24.7 Detected   | 7.1 Not Detect  | 272.8 Detected  | 1180.4 Detected  | Crisp1        | 47.78947368 | 11.0445344 | 166.253521 | 38.422535 |
| A_55_P1971 | 2.7 Not Detect  | 80.5 Detected   | 52.3 Detected   | 128.7 Detected   | 1810019J16Rik | 47.66666667 | 19.3703704 | 1.59875776 | 0.6496894 |
| A_55_P2088 | 3.1 Not Detect  | 3.8 Not Detect  | 3.7 Not Detect  | 147.5 Detected   | Synpr         | 47.58064516 | 1.19354839 | 38.8157895 | 0.9736842 |
| A_55_P2186 | 7 Not Detect    | 3.8 Not Detect  | 17.1 Not Detect | 332.7 Detected   | Agxt2         | 47.52857143 | 2.44285714 | 87.5526316 | 4.5       |
| A_55_P1987 | 2.7 Not Detect  | 6.3 Not Detect  | 3.1 Not Detect  | 128.3 Detected   | Uba1y         | 47.51851852 | 1.14814815 | 20.3650794 | 0.4920635 |
| A_55_P2409 | 2.7 Not Detect  | 3 Not Detect    | 3.1 Not Detect  | 128.1 Detected   | 7630403G23Rik | 47.44444444 | 1.14814815 | 42.7       | 1.0333333 |
| A_55_P2054 | 3 Not Detect    | 3.5 Not Detect  | 3.6 Not Detect  | 139.5 Detected   | Pira2         | 46.5        | 1.2        | 39.8571429 | 1.0285714 |
| A_55_P2100 | 2.8 Not Detect  | 3.3 Not Detect  | 3.3 Not Detect  | 129.9 Detected   | Cfc1          | 46.39285714 | 1.17857143 | 39.3636364 | 1         |
| A_55_P2360 | 3.2 Not Detect  | 3.8 Not Detect  | 10.7 Not Detect | 147.5 Detected   | 1700086P04Rik | 46.09375    | 3.34375    | 38.8157895 | 2.8157895 |
| A_51_P3385 | 2.7 Not Detect  | 3 Not Detect    | 7.1 Not Detect  | 124.1 Detected   | 4930402K13Rik | 45.96296296 | 2.62962963 | 41.3666667 | 2.3666667 |
| A_52_P5491 | 2.8 Not Detect  | 68.7 Detected   | 26 Detected     | 128.2 Detected   | Arsj          | 45.78571429 | 9.28571429 | 1.86608443 | 0.3784571 |
| A_55_P2180 | 2.8 Not Detect  | 3.6 Not Detect  | 6 Not Detect    | 127.7 Detected   | Fgf20         | 45.60714286 | 2.14285714 | 35.4722222 | 1.6666667 |
| A_51_P3697 | 4.1 Not Detect  | 3.4 Not Detect  | 3.4 Not Detect  | 186.1 Detected   | Ces1e         | 45.3902439  | 0.82926829 | 54.7352941 | 1         |
| A_52_P2433 | 99.9 Detected   | 776 Detected    | 1099.8 Detected | 4528.1 Detected  | Sema4f        | 45.32632633 | 11.009009  | 5.83518041 | 1.417268  |
| A_55_P1954 | 8 Not Detect    | 3.3 Not Detect  | 3.4 Not Detect  | 362.6 Detected   | Gm4297        | 45.325      | 0.425      | 109.878788 | 1.030303  |
| A_55_P2332 | 13.3 Not Detect | 119.1 Detected  | 25.1 Detected   | 601 Detected     | 2810037O22Rik | 45.18796992 | 1.88721805 | 5.04617968 | 0.2107473 |
| A_55_P2389 | 2.9 Not Detect  | 3.4 Not Detect  | 3.5 Not Detect  | 131 Detected     | 9430014N10Rik | 45.17241379 | 1.20689655 | 38.5294118 | 1.0294118 |
| A_55_P2130 | 4.4 Not Detect  | 3.7 Not Detect  | 3 Not Detect    | 198.1 Detected   | Lingo1        | 45.02272727 | 0.68181818 | 53.5405405 | 0.8108108 |
| A_52_P1516 | 32.5 Detected   | 26.4 Detected   | 38.7 Detected   | 1452.3 Compromis | Tmem191c      | 44.68615385 | 1.19076923 | 55.0113636 | 1.4659091 |
| A_52_P2677 | 3 Not Detect    | 3.7 Not Detect  | 3.7 Not Detect  | 133.1 Detected   | Cd209b        | 44.36666667 | 1.23333333 | 35.972973  | 1         |

|            |                |                 |                  |                  |               |             |            |            |           |
|------------|----------------|-----------------|------------------|------------------|---------------|-------------|------------|------------|-----------|
| A_52_P6101 | 2.7 Not Detect | 6.8 Not Detect  | 3.2 Not Detect   | 119.7 Detected   | Ncam2         | 44.33333333 | 1.18518519 | 17.6029412 | 0.4705882 |
| A_51_P4972 | 2.9 Not Detect | 110.2 Detected  | 61 Detected      | 128.3 Detected   | E330013P04Rik | 44.24137931 | 21.0344828 | 1.16424682 | 0.553539  |
| A_55_P2109 | 52.6 Detected  | 4.6 Not Detect  | 23.4 Detected    | 2309.9 Detected  | Hmgcs2        | 43.91444867 | 0.44486692 | 502.152174 | 5.0869565 |
| A_55_P1960 | 472.5 Detected | 1575.9 Detected | 17642.4 Detected | 20704.1 Detected | Tjp3          | 43.81820106 | 37.3384127 | 13.1379529 | 11.195127 |
| A_55_P2097 | 2.7 Not Detect | 3.1 Not Detect  | 3.1 Not Detect   | 117.8 Detected   | Gm13769       | 43.62962963 | 1.14814815 | 38         | 1         |
| A_55_P2046 | 5.3 Not Detect | 3.3 Not Detect  | 30.5 Detected    | 228.6 Detected   | Gm10693       | 43.13207547 | 5.75471698 | 69.2727273 | 9.2424242 |
| A_55_P2027 | 3.1 Not Detect | 3.7 Not Detect  | 79.9 Detected    | 133.4 Detected   | Plcl1         | 43.03225806 | 25.7741935 | 36.0540541 | 21.594595 |
| A_51_P4757 | 2.6 Not Detect | 2.9 Not Detect  | 3 Not Detect     | 109.9 Detected   | Klrc2         | 42.26923077 | 1.15384615 | 37.8965517 | 1.0344828 |
| A_55_P1962 | 4.5 Not Detect | 18.4 Detected   | 13.3 Not Detect  | 187.9 Detected   | Syk           | 41.75555556 | 2.95555556 | 10.2119565 | 0.7228261 |
| A_51_P2061 | 2.8 Not Detect | 3.3 Not Detect  | 3.3 Not Detect   | 116.8 Detected   | Gtf2a1l       | 41.71428571 | 1.17857143 | 35.3939394 | 1         |
| A_51_P3535 | 4.2 Not Detect | 3.7 Not Detect  | 4.8 Not Detect   | 175 Detected     | Magee2        | 41.66666667 | 1.14285714 | 47.2972973 | 1.2972973 |
| A_55_P1955 | 3.5 Not Detect | 145.5 Detected  | 31.2 Detected    | 145.5 Detected   | Grb14         | 41.57142857 | 8.91428571 | 1          | 0.214433  |
| A_55_P2178 | 2.8 Not Detect | 3.2 Not Detect  | 3.2 Not Detect   | 115.9 Detected   | A430027H14Rik | 41.39285714 | 1.14285714 | 36.21875   | 1         |
| A_55_P2176 | 4.9 Not Detect | 3.3 Not Detect  | 6 Not Detect     | 202.4 Detected   | Lrrc4         | 41.30612245 | 1.2244898  | 61.3333333 | 1.8181818 |
| A_52_P3283 | 3.9 Not Detect | 9.5 Not Detect  | 11.3 Not Detect  | 160.9 Detected   | Lrrc16b       | 41.25641026 | 2.8974359  | 16.9368421 | 1.1894737 |
| A_52_P7776 | 2.8 Not Detect | 19.5 Detected   | 3.2 Not Detect   | 114.8 Detected   | Slc7a2        | 41          | 1.14285714 | 5.88717949 | 0.1641026 |
| A_51_P3933 | 14.2 Detected  | 10.1 Not Detect | 5.8 Not Detect   | 580 Compromis    | Sidt1         | 40.84507042 | 0.4084507  | 57.4257426 | 0.5742574 |
| A_55_P2065 | 18.3 Detected  | 266.8 Detected  | 275.9 Detected   | 746 Detected     | Macrod2       | 40.76502732 | 15.0765027 | 2.79610195 | 1.0341079 |
| A_55_P2019 | 3.1 Not Detect | 192.1 Detected  | 8.9 Not Detect   | 125.9 Detected   | Slc43a1       | 40.61290323 | 2.87096774 | 0.65538782 | 0.04633   |
| A_55_P2004 | 6.9 Not Detect | 32.8 Detected   | 8.8 Not Detect   | 278.1 Compromis  | Klra8         | 40.30434783 | 1.27536232 | 8.47865854 | 0.2682927 |
| A_55_P2094 | 4.5 Not Detect | 19.5 Detected   | 18 Detected      | 181.2 Detected   | Slc17a4       | 40.26666667 | 4          | 9.29230769 | 0.9230769 |
| A_52_P6333 | 4.4 Not Detect | 9.6 Not Detect  | 12 Not Detect    | 176.8 Detected   | Morc1         | 40.18181818 | 2.72727273 | 18.4166667 | 1.25      |
| A_55_P1993 | 2.8 Not Detect | 3.3 Not Detect  | 3.3 Not Detect   | 112.5 Detected   | Olfr761       | 40.17857143 | 1.17857143 | 34.0909091 | 1         |
| A_52_P8459 | 2.9 Not Detect | 3.4 Not Detect  | 3.4 Not Detect   | 116.5 Detected   | Tpsab1        | 40.17241379 | 1.17241379 | 34.2647059 | 1         |
| A_52_P8070 | 3 Not Detect   | 3.6 Not Detect  | 3.6 Not Detect   | 120.2 Detected   | 4930503B20Rik | 40.06666667 | 1.2        | 33.3888889 | 1         |
| A_66_P1287 | 4 Not Detect   | 11.2 Not Detect | 3.6 Not Detect   | 159.8 Detected   | Gm1045        | 39.95       | 0.9        | 14.2678571 | 0.3214286 |
| A_51_P2532 | 27.4 Detected  | 385.5 Detected  | 1003 Detected    | 1093.3 Detected  | Slc51a        | 39.90145985 | 36.6058394 | 2.83605707 | 2.6018158 |
| A_55_P2017 | 2.8 Not Detect | 3.3 Not Detect  | 3.3 Not Detect   | 111.6 Detected   | Olfr915       | 39.85714286 | 1.17857143 | 33.8181818 | 1         |
| A_52_P1396 | 3 Not Detect   | 3.5 Not Detect  | 3.5 Not Detect   | 119.3 Detected   | Pfn4          | 39.76666667 | 1.16666667 | 34.0857143 | 1         |
| A_55_P1974 | 65.3 Detected  | 44.6 Detected   | 98 Detected      | 2582.1 Detected  | Gm14625       | 39.54211332 | 1.5007657  | 57.8946188 | 2.1973094 |
| A_52_P4858 | 5.4 Not Detect | 12.4 Not Detect | 15.7 Not Detect  | 211.3 Detected   | Mgam          | 39.12962963 | 2.90740741 | 17.0403226 | 1.266129  |
| A_55_P1953 | 2.9 Not Detect | 810.4 Detected  | 92 Detected      | 112.6 Detected   | Serinc2       | 38.82758621 | 31.7241379 | 0.13894373 | 0.1135242 |
| A_55_P2383 | 2.8 Not Detect | 5.5 Not Detect  | 88 Detected      | 108.5 Detected   | 2310001H17Rik | 38.75       | 31.4285714 | 19.7272727 | 16        |
| A_55_P2143 | 4.6 Not Detect | 9.6 Not Detect  | 3.8 Not Detect   | 177.6 Detected   | LOC101055798  | 38.60869565 | 0.82608696 | 18.5       | 0.3958333 |
| A_55_P2043 | 4.3 Not Detect | 472.5 Detected  | 6.9 Not Detect   | 163.5 Detected   | Prdm6         | 38.02325581 | 1.60465116 | 0.34603175 | 0.0146032 |
| A_51_P2596 | 2.7 Not Detect | 3.3 Not Detect  | 10.9 Not Detect  | 102.5 Detected   | Adcyap1r1     | 37.96296296 | 4.03703704 | 31.0606061 | 3.3030303 |
| A_55_P2377 | 2.7 Not Detect | 3.1 Not Detect  | 3.1 Not Detect   | 101.8 Detected   | 4933409L14Rik | 37.7037037  | 1.14814815 | 32.8387097 | 1         |
| A_51_P1704 | 9.5 Not Detect | 25.2 Detected   | 29.6 Detected    | 357.7 Detected   | Gpr17         | 37.65263158 | 3.11578947 | 14.1944444 | 1.1746032 |
| A_55_P2098 | 3.1 Not Detect | 3.8 Not Detect  | 3.9 Not Detect   | 116.2 Detected   | C87414        | 37.48387097 | 1.25806452 | 30.5789474 | 1.0263158 |
| A_55_P2359 | 24.5 Detected  | 21.5 Detected   | 18.7 Detected    | 917.5 Compromis  | 3010033K07Rik | 37.44897959 | 0.76326531 | 42.6744186 | 0.8697674 |

|            |                 |                  |                 |                  |               |             |            |            |           |
|------------|-----------------|------------------|-----------------|------------------|---------------|-------------|------------|------------|-----------|
| A_66_P1284 | 2.8 Not Detect  | 5.4 Not Detect   | 3.3 Not Detect  | 104.5 Detected   | Bend7         | 37.32142857 | 1.17857143 | 19.3518519 | 0.6111111 |
| A_55_P2338 | 3.1 Not Detect  | 5.6 Not Detect   | 3.1 Not Detect  | 114.7 Detected   | A930027P06Rik | 37          | 1          | 20.4821429 | 0.5535714 |
| A_55_P1976 | 57.5 Detected   | 39.4 Detected    | 75 Detected     | 2125.3 Detected  | Gm14625       | 36.96173913 | 1.30434783 | 53.9416244 | 1.9035533 |
| A_55_P2137 | 9.1 Not Detect  | 3.2 Not Detect   | 4.5 Not Detect  | 333.3 Detected   | Gm996         | 36.62637363 | 0.49450549 | 104.15625  | 1.40625   |
| A_55_P2177 | 3.7 Not Detect  | 3.3 Not Detect   | 3.3 Not Detect  | 135.1 Detected   | Lipi          | 36.51351351 | 0.89189189 | 40.9393939 | 1         |
| A_55_P2141 | 5.8 Not Detect  | 3.3 Not Detect   | 3.4 Not Detect  | 211 Detected     | Zbtb49        | 36.37931034 | 0.5862069  | 63.9393939 | 1.030303  |
| A_51_P1032 | 1533 Detected   | 11327.1 Detected | 92272 Detected  | 55531.8 Detected | Slc39a4       | 36.22426614 | 60.1904762 | 4.90256111 | 8.1461274 |
| A_66_P1080 | 3 Not Detect    | 11.5 Not Detect  | 4.9 Not Detect  | 108.2 Detected   | Espn          | 36.06666667 | 1.63333333 | 9.40869565 | 0.426087  |
| A_55_P2040 | 4.7 Not Detect  | 5.8 Not Detect   | 18.1 Detected   | 168.9 Detected   | Gm14548       | 35.93617021 | 3.85106383 | 29.1206897 | 3.1206897 |
| A_52_P6815 | 3 Not Detect    | 7.9 Not Detect   | 3.6 Not Detect  | 107.6 Detected   | Naaladl2      | 35.86666667 | 1.2        | 13.6202532 | 0.4556962 |
| A_52_P4179 | 38.1 Detected   | 27.2 Detected    | 69.1 Detected   | 1360 Detected    | 3830403N18Rik | 35.69553806 | 1.81364829 | 50         | 2.5404412 |
| A_51_P2362 | 11.1 Not Detect | 6.9 Not Detect   | 95.2 Detected   | 395.9 Detected   | St8sia4       | 35.66666667 | 8.57657658 | 57.3768116 | 13.797101 |
| A_51_P1484 | 7.2 Not Detect  | 3.7 Not Detect   | 3.6 Not Detect  | 256.6 Detected   | Olf510        | 35.63888889 | 0.5        | 69.3513514 | 0.972973  |
| A_52_P3040 | 2.7 Not Detect  | 14.1 Not Detect  | 3.2 Not Detect  | 96 Detected      | Jakmip2       | 35.55555556 | 1.18518519 | 6.80851064 | 0.2269504 |
| A_55_P2183 | 2.7 Not Detect  | 3.1 Not Detect   | 3.1 Not Detect  | 94.9 Detected    | Olf57         | 35.14814815 | 1.14814815 | 30.6129032 | 1         |
| A_55_P2177 | 3.1 Not Detect  | 3.8 Not Detect   | 3.7 Not Detect  | 108.7 Detected   | Htr7          | 35.06451613 | 1.19354839 | 28.6052632 | 0.9736842 |
| A_55_P2178 | 3.1 Not Detect  | 3.7 Not Detect   | 3.8 Not Detect  | 108.6 Detected   | 1110020C17Rik | 35.03225806 | 1.22580645 | 29.3513514 | 1.027027  |
| A_55_P2078 | 3.5 Not Detect  | 3.6 Not Detect   | 5.5 Not Detect  | 121.9 Detected   | Nrl           | 34.82857143 | 1.57142857 | 33.8611111 | 1.5277778 |
| A_55_P2121 | 23.6 Detected   | 101.7 Detected   | 1024 Detected   | 814.8 Detected   | Fgfr4         | 34.52542373 | 43.3898305 | 8.01179941 | 10.06883  |
| A_55_P2102 | 8.6 Not Detect  | 6.3 Not Detect   | 64.2 Detected   | 296.7 Detected   | Gstm3         | 34.5        | 7.46511628 | 47.0952381 | 10.190476 |
| A_51_P2454 | 5 Not Detect    | 3 Not Detect     | 4.2 Not Detect  | 172.4 Detected   | Klk1          | 34.48       | 0.84       | 57.4666667 | 1.4       |
| A_51_P3896 | 5 Not Detect    | 36.6 Detected    | 31.5 Detected   | 171.1 Detected   | Mrgprb2       | 34.22       | 6.3        | 4.67486339 | 0.8606557 |
| A_51_P2139 | 28.1 Detected   | 238.7 Detected   | 108.2 Detected  | 958 Detected     | Nap1l3        | 34.09252669 | 3.85053381 | 4.01340595 | 0.4532886 |
| A_55_P2010 | 2.8 Not Detect  | 3.2 Not Detect   | 3.2 Not Detect  | 95 Detected      | Capn3         | 33.92857143 | 1.14285714 | 29.6875    | 1         |
| A_51_P2091 | 7.4 Not Detect  | 111.2 Detected   | 8.6 Not Detect  | 250.4 Detected   | Pcdh10        | 33.83783784 | 1.16216216 | 2.25179856 | 0.0773381 |
| A_55_P2054 | 120.8 Detected  | 40.9 Detected    | 1966.9 Detected | 4080.3 Detected  | Mcpt2         | 33.77731788 | 16.2822848 | 99.7628362 | 48.090465 |
| A_55_P1987 | 2.8 Not Detect  | 4.2 Not Detect   | 68.4 Detected   | 94.4 Detected    | Ttll9         | 33.71428571 | 24.4285714 | 22.4761905 | 16.285714 |
| A_51_P3758 | 4.3 Not Detect  | 3.4 Not Detect   | 365.4 Detected  | 144.9 Detected   | Srp3          | 33.69767442 | 84.9767442 | 42.6176471 | 107.47059 |
| A_55_P2081 | 7.9 Not Detect  | 6.4 Not Detect   | 10.4 Not Detect | 265.8 Detected   | Sptbn5        | 33.64556962 | 1.3164557  | 41.53125   | 1.625     |
| A_55_P2007 | 2.8 Not Detect  | 13 Not Detect    | 3.3 Not Detect  | 94.1 Detected    | Gm10871       | 33.60714286 | 1.17857143 | 7.23846154 | 0.2538462 |
| A_51_P4528 | 3 Not Detect    | 3.5 Not Detect   | 83.4 Detected   | 100.6 Detected   | Ssxb1         | 33.53333333 | 27.8       | 28.7428571 | 23.828571 |
| A_55_P1981 | 34 Detected     | 60.9 Detected    | 42.4 Detected   | 1133.6 Detected  | Ptprt         | 33.34117647 | 1.24705882 | 18.6141215 | 0.6962233 |
| A_66_P1292 | 23.7 Detected   | 13.6 Not Detect  | 49.7 Detected   | 787.3 Compromis  | Gm12511       | 33.21940928 | 2.09704641 | 57.8897059 | 3.6544118 |
| A_55_P2078 | 73.7 Detected   | 461.8 Detected   | 924.1 Detected  | 2442 Detected    | Aqp8          | 33.13432836 | 12.5386703 | 5.28800346 | 2.0010827 |
| A_51_P4226 | 3.2 Not Detect  | 3.4 Not Detect   | 3.4 Not Detect  | 105.7 Detected   | Arl11         | 33.03125    | 1.0625     | 31.0882353 | 1         |
| A_55_P2109 | 2.7 Not Detect  | 10 Not Detect    | 3.2 Not Detect  | 89 Detected      | Glt1d1        | 32.96296296 | 1.18518519 | 8.9        | 0.32      |
| A_55_P2043 | 6.9 Not Detect  | 5 Not Detect     | 6.5 Not Detect  | 227.2 Detected   | Cadps2        | 32.92753623 | 0.94202899 | 45.44      | 1.3       |
| A_55_P1971 | 3 Not Detect    | 66.6 Detected    | 53.9 Detected   | 98.7 Detected    | Esx1          | 32.9        | 17.9666667 | 1.48198198 | 0.8093093 |
| A_55_P1984 | 3 Not Detect    | 144.7 Detected   | 3.5 Not Detect  | 98.7 Detected    | Cbln1         | 32.9        | 1.16666667 | 0.6821009  | 0.024188  |
| A_51_P3775 | 3.1 Not Detect  | 3.7 Not Detect   | 3.7 Not Detect  | 101.1 Detected   | Oprk1         | 32.61290323 | 1.19354839 | 27.3243243 | 1         |



|            |                 |                 |                  |                  |               |             |            |            |           |
|------------|-----------------|-----------------|------------------|------------------|---------------|-------------|------------|------------|-----------|
| A_55_P1992 | 4.2 Not Detect  | 3.1 Not Detect  | 3.1 Not Detect   | 136.8 Detected   | Hmgcs2        | 32.57142857 | 0.73809524 | 44.1290323 | 1         |
| A_51_P1226 | 405.7 Detected  | 154.3 Detected  | 3336.1 Detected  | 13086 Detected   | Degs2         | 32.2553611  | 8.22307123 | 84.808814  | 21.620868 |
| A_51_P3972 | 4.4 Not Detect  | 176.1 Detected  | 3.3 Not Detect   | 141.6 Detected   | Marveld3      | 32.18181818 | 0.75       | 0.80408859 | 0.0187394 |
| A_55_P2132 | 24 Detected     | 17.8 Detected   | 27.1 Detected    | 771.9 Compromis  | A930004D18Rik | 32.1625     | 1.12916667 | 43.3651685 | 1.5224719 |
| A_55_P2013 | 4.8 Not Detect  | 3.3 Not Detect  | 3.7 Not Detect   | 154.3 Detected   | Oosp1         | 32.14583333 | 0.77083333 | 46.7575758 | 1.1212121 |
| A_55_P2156 | 124.1 Detected  | 1644.1 Detected | 1265.6 Detected  | 3985.7 Detected  | Cdh9          | 32.11684126 | 10.1982272 | 2.42424427 | 0.7697829 |
| A_51_P4729 | 3.1 Not Detect  | 3.7 Not Detect  | 34.9 Detected    | 99.4 Detected    | Atp8b1        | 32.06451613 | 11.2580645 | 26.8648649 | 9.4324324 |
| A_51_P5064 | 161.2 Detected  | 1045.8 Detected | 3285 Detected    | 5145.2 Detected  | Krt14         | 31.91811414 | 20.3784119 | 4.91986996 | 3.141136  |
| A_55_P2358 | 3 Not Detect    | 3.5 Not Detect  | 3.5 Not Detect   | 95.5 Detected    | AU021128      | 31.83333333 | 1.16666667 | 27.2857143 | 1         |
| A_55_P2030 | 2.8 Not Detect  | 5.5 Not Detect  | 3.4 Not Detect   | 89.1 Detected    | Ifnab         | 31.82142857 | 1.21428571 | 16.2       | 0.6181818 |
| A_55_P2176 | 3.6 Not Detect  | 49.2 Detected   | 8.9 Not Detect   | 114 Detected     | Usp51         | 31.66666667 | 2.47222222 | 2.31707317 | 0.1808943 |
| A_55_P2299 | 7.3 Not Detect  | 3.6 Not Detect  | 3.7 Not Detect   | 231 Detected     | Olfr22-ps1    | 31.64383562 | 0.50684932 | 64.1666667 | 1.0277778 |
| A_51_P4452 | 2.7 Not Detect  | 3.1 Not Detect  | 3.2 Not Detect   | 85.4 Detected    | Piwil1        | 31.62962963 | 1.18518519 | 27.5483871 | 1.0322581 |
| A_55_P2057 | 16.1 Detected   | 19.1 Detected   | 17.4 Not Detect  | 500.2 Compromis  | Olfr843       | 31.06832298 | 1.08074534 | 26.1884817 | 0.9109948 |
| A_51_P1037 | 17.9 Detected   | 16.9 Not Detect | 558.8 Detected   | 556.1 Detected   | Cyp2c29       | 31.06703911 | 31.2178771 | 32.9053254 | 33.065089 |
| A_55_P2012 | 37.7 Detected   | 156 Detected    | 1081.6 Detected  | 1169 Detected    | Spata6        | 31.00795756 | 28.6896552 | 7.49358974 | 6.9333333 |
| A_52_P3131 | 3 Not Detect    | 4 Not Detect    | 3.6 Not Detect   | 92 Detected      | Yipf7         | 30.66666667 | 1.2        | 23         | 0.9       |
| A_55_P2160 | 3.1 Not Detect  | 3.8 Not Detect  | 3.7 Not Detect   | 94.9 Detected    | Prl           | 30.61290323 | 1.19354839 | 24.9736842 | 0.9736842 |
| A_66_P1118 | 12.1 Not Detect | 54.3 Detected   | 190.1 Detected   | 370.3 Detected   | Gm3336        | 30.60330579 | 15.7107438 | 6.81952118 | 3.5009208 |
| A_55_P2381 | 6.8 Not Detect  | 11.5 Not Detect | 3.3 Not Detect   | 207.6 Detected   | 6430706H07Rik | 30.52941176 | 0.48529412 | 18.0521739 | 0.2869565 |
| A_55_P2068 | 17.6 Detected   | 3.5 Not Detect  | 8.4 Not Detect   | 535.4 Compromis  | Phactr1       | 30.42045455 | 0.47727273 | 152.971429 | 2.4       |
| A_52_P4042 | 2.8 Not Detect  | 3.3 Not Detect  | 3.3 Not Detect   | 84.8 Detected    | Olfr711       | 30.28571429 | 1.17857143 | 25.6969697 | 1         |
| A_51_P5077 | 117.9 Detected  | 793.3 Detected  | 1537.7 Detected  | 3550.7 Detected  | Sdr42e1       | 30.11620017 | 13.0424088 | 4.47586033 | 1.9383588 |
| A_55_P2385 | 2.6 Not Detect  | 3.4 Not Detect  | 3 Not Detect     | 77.9 Detected    | 0610009K14Rik | 29.96153846 | 1.15384615 | 22.9117647 | 0.8823529 |
| A_55_P2176 | 24.1 Detected   | 504.8 Detected  | 162.9 Detected   | 718.9 Detected   | Prex1         | 29.82987552 | 6.7593361  | 1.42412837 | 0.3227021 |
| A_52_P5337 | 23.4 Detected   | 324.8 Detected  | 163.1 Detected   | 694.1 Detected   | Chrna1        | 29.66239316 | 6.97008547 | 2.13700739 | 0.5021552 |
| A_51_P2498 | 44.9 Detected   | 128.6 Detected  | 735.3 Detected   | 1330.5 Detected  | Dsg2          | 29.6325167  | 16.376392  | 10.3460342 | 5.7177294 |
| A_55_P2030 | 3.1 Not Detect  | 3.7 Not Detect  | 3.8 Not Detect   | 91.8 Detected    | Olfr1272      | 29.61290323 | 1.22580645 | 24.8108108 | 1.027027  |
| A_55_P1991 | 1708.1 Detected | 1835.1 Detected | 11941.9 Detected | 50531.2 Detected | Pdlim4        | 29.58327967 | 6.9913354  | 27.5359381 | 6.5074928 |
| A_52_P1201 | 3.3 Not Detect  | 9.9 Not Detect  | 3.6 Not Detect   | 97.6 Detected    | 6030452D12Rik | 29.57575758 | 1.09090909 | 9.85858586 | 0.3636364 |
| A_52_P4004 | 3.1 Not Detect  | 3.6 Not Detect  | 3.7 Not Detect   | 91.5 Detected    | Pirt          | 29.51612903 | 1.19354839 | 25.4166667 | 1.0277778 |
| A_55_P2155 | 2.7 Not Detect  | 3 Not Detect    | 3 Not Detect     | 79.6 Detected    | Gm12695       | 29.48148148 | 1.11111111 | 26.5333333 | 1         |
| A_52_P3789 | 3 Not Detect    | 3.7 Not Detect  | 3.6 Not Detect   | 88.1 Detected    | Rgs2          | 29.36666667 | 1.2        | 23.8108108 | 0.972973  |
| A_52_P3303 | 3 Not Detect    | 3.5 Not Detect  | 3.5 Not Detect   | 88 Detected      | Agbl2         | 29.33333333 | 1.16666667 | 25.1428571 | 1         |
| A_51_P4016 | 2.6 Not Detect  | 2.9 Not Detect  | 3 Not Detect     | 76.2 Detected    | Laptm5        | 29.30769231 | 1.15384615 | 26.2758621 | 1.0344828 |
| A_55_P2151 | 6.3 Not Detect  | 6.4 Not Detect  | 39 Detected      | 184.3 Detected   | Pira11        | 29.25396825 | 6.19047619 | 28.796875  | 6.09375   |
| A_55_P1969 | 2.8 Not Detect  | 3.3 Not Detect  | 3.3 Not Detect   | 81.5 Detected    | 5730585A16Rik | 29.10714286 | 1.17857143 | 24.6969697 | 1         |
| A_55_P2318 | 1426.4 Detected | 8343.1 Detected | 16035.2 Detected | 41280.7 Detected | Aqp8          | 28.94047953 | 11.2417274 | 4.94788508 | 1.9219714 |
| A_55_P2326 | 70.8 Detected   | 59.1 Detected   | 33 Detected      | 2047.9 Compromis | A630057N01Rik | 28.92514124 | 0.46610169 | 34.6514382 | 0.5583756 |
| A_55_P2109 | 17.2 Detected   | 5.5 Not Detect  | 15.7 Not Detect  | 496.9 Compromis  | Filip11       | 28.88953488 | 0.9127907  | 90.3454545 | 2.8545455 |

|            |                 |                 |                 |                 |               |             |            |            |           |
|------------|-----------------|-----------------|-----------------|-----------------|---------------|-------------|------------|------------|-----------|
| A_55_P2017 | 3.5 Not Detect  | 253.2 Detected  | 122.7 Detected  | 101.1 Detected  | Cfh           | 28.88571429 | 35.0571429 | 0.3992891  | 0.4845972 |
| A_55_P2032 | 16.4 Detected   | 16 Not Detect   | 8.7 Not Detect  | 469.5 Detected  | Gm10450       | 28.62804878 | 0.5304878  | 29.34375   | 0.54375   |
| A_52_P2705 | 3.1 Not Detect  | 5.6 Not Detect  | 3.8 Not Detect  | 88.5 Detected   | Scgb2b27      | 28.5483871  | 1.22580645 | 15.8035714 | 0.6785714 |
| A_51_P4788 | 8.1 Not Detect  | 28 Detected     | 16.7 Detected   | 231 Detected    | 1700034F02Rik | 28.51851852 | 2.0617284  | 8.25       | 0.5964286 |
| A_52_P1530 | 3.8 Not Detect  | 2.9 Not Detect  | 76.9 Detected   | 108.3 Detected  | Ptgr          | 28.5        | 20.2368421 | 37.3448276 | 26.517241 |
| A_52_P1564 | 2.6 Not Detect  | 2.9 Not Detect  | 3 Not Detect    | 73.5 Detected   | Cmah          | 28.26923077 | 1.15384615 | 25.3448276 | 1.0344828 |
| A_55_P1993 | 65.1 Detected   | 796.9 Detected  | 408.8 Detected  | 1838.9 Detected | Dcp1b         | 28.24731183 | 6.27956989 | 2.30756682 | 0.5129878 |
| A_55_P2279 | 10.7 Not Detect | 19.7 Detected   | 11.7 Not Detect | 300.1 Detected  | AU019202      | 28.04672897 | 1.09345794 | 15.2335025 | 0.5939086 |
| A_55_P1987 | 13.7 Not Detect | 23.8 Detected   | 25.6 Detected   | 383.3 Detected  | Fuom          | 27.97810219 | 1.86861314 | 16.105042  | 1.0756303 |
| A_55_P2089 | 4.1 Not Detect  | 10.3 Not Detect | 3.5 Not Detect  | 114.2 Detected  | Sly           | 27.85365854 | 0.85365854 | 11.0873786 | 0.3398058 |
| A_55_P2032 | 11.3 Not Detect | 27.3 Detected   | 98.9 Detected   | 314.7 Detected  | LOC101056207  | 27.84955752 | 8.75221239 | 11.5274725 | 3.6227106 |
| A_66_P1214 | 102.6 Detected  | 114.5 Detected  | 981.7 Detected  | 2852.5 Detected | Gm7969        | 27.80214425 | 9.56822612 | 24.9126638 | 8.5737991 |
| A_52_P2647 | 5.3 Not Detect  | 36.4 Detected   | 879.7 Detected  | 146.3 Detected  | Pdgrd         | 27.60377358 | 165.981132 | 4.01923077 | 24.167582 |
| A_66_P1007 | 2.9 Not Detect  | 3.4 Not Detect  | 3.4 Not Detect  | 79.8 Detected   | Magea5        | 27.51724138 | 1.17241379 | 23.4705882 | 1         |
| A_55_P2007 | 11.9 Not Detect | 16.5 Not Detect | 28.1 Detected   | 327.4 Detected  | Frm4b         | 27.51260504 | 2.36134454 | 19.8424242 | 1.7030303 |
| A_66_P1205 | 16.9 Detected   | 19.4 Detected   | 14.1 Not Detect | 464.9 Detected  | 4931440F15Rik | 27.50887574 | 0.83431953 | 23.9639175 | 0.7268041 |
| A_55_P2001 | 2.7 Not Detect  | 3 Not Detect    | 3 Not Detect    | 74.2 Detected   | 2310015D24Rik | 27.48148148 | 1.11111111 | 24.7333333 | 1         |
| A_55_P1964 | 3 Not Detect    | 3.6 Not Detect  | 35.3 Detected   | 82.1 Detected   | Cyp2c37       | 27.36666667 | 11.7666667 | 22.8055556 | 9.8055556 |
| A_51_P4990 | 203.4 Detected  | 1187.4 Detected | 1076.5 Detected | 5550.5 Detected | Fbp2          | 27.2885939  | 5.29252704 | 4.67449891 | 0.9066027 |
| A_55_P2181 | 26.9 Detected   | 81.8 Detected   | 161.8 Detected  | 730.2 Detected  | Adm2          | 27.14498141 | 6.01486989 | 8.92665037 | 1.9779951 |
| A_55_P1977 | 2.9 Not Detect  | 3.4 Not Detect  | 3.5 Not Detect  | 78.6 Detected   | Htr2b         | 27.10344828 | 1.20689655 | 23.1176471 | 1.0294118 |
| A_55_P1965 | 6.8 Not Detect  | 3.5 Not Detect  | 5.2 Not Detect  | 184.1 Detected  | Gabrg2        | 27.07352941 | 0.76470588 | 52.6       | 1.4857143 |
| A_52_P2299 | 14.2 Detected   | 158.5 Detected  | 355.3 Detected  | 384.4 Detected  | Slc51a        | 27.07042254 | 25.0211268 | 2.42523659 | 2.2416404 |
| A_55_P1952 | 62.7 Detected   | 799.9 Detected  | 376.6 Detected  | 1695.1 Detected | Dcp1b         | 27.03508772 | 6.00637959 | 2.11913989 | 0.4708089 |
| A_55_P2408 | 7.2 Not Detect  | 4.9 Not Detect  | 3.1 Not Detect  | 194.6 Detected  | AI414108      | 27.02777778 | 0.43055556 | 39.7142857 | 0.6326531 |
| A_55_P2223 | 10.1 Not Detect | 5.3 Not Detect  | 5.7 Not Detect  | 272.5 Detected  | A730062M13Rik | 26.98019802 | 0.56435644 | 51.4150943 | 1.0754717 |
| A_55_P2119 | 34.2 Detected   | 54.4 Detected   | 346.8 Detected  | 919.3 Detected  | AA414992      | 26.88011696 | 10.1403509 | 16.8988971 | 6.375     |
| A_66_P1031 | 3 Not Detect    | 3.5 Not Detect  | 3.5 Not Detect  | 80.2 Detected   | Gm12474       | 26.73333333 | 1.16666667 | 22.9142857 | 1         |
| A_52_P3025 | 4.2 Not Detect  | 3.1 Not Detect  | 3.1 Not Detect  | 112.1 Detected  | Col8a2        | 26.69047619 | 0.73809524 | 36.1612903 | 1         |
| A_55_P2157 | 4.6 Not Detect  | 4.1 Not Detect  | 3.3 Not Detect  | 122.3 Detected  | Nalcn         | 26.58695652 | 0.7173913  | 29.8292683 | 0.804878  |
| A_51_P3948 | 4.5 Not Detect  | 3.7 Not Detect  | 4.2 Not Detect  | 119.5 Detected  | Gm11346       | 26.55555556 | 0.93333333 | 32.2972973 | 1.1351351 |
| A_55_P2174 | 2.6 Not Detect  | 2.9 Not Detect  | 3 Not Detect    | 68.9 Detected   | Olf66         | 26.5        | 1.15384615 | 23.7586207 | 1.0344828 |
| A_55_P2057 | 16.9 Detected   | 6 Not Detect    | 4.7 Not Detect  | 447.6 Detected  | Mid1          | 26.4852071  | 0.27810651 | 74.6       | 0.7833333 |
| A_55_P1960 | 20.6 Detected   | 850.9 Detected  | 102.3 Detected  | 543.6 Detected  | Cd209e        | 26.38834951 | 4.96601942 | 0.63885298 | 0.1202256 |
| A_51_P1663 | 30.5 Detected   | 11.2 Not Detect | 361.7 Detected  | 803.1 Detected  | Avil          | 26.33114754 | 11.8590164 | 71.7053571 | 32.294643 |
| A_51_P1818 | 45.4 Detected   | 558.6 Detected  | 155.3 Detected  | 1194.7 Detected | Amer2         | 26.31497797 | 3.42070485 | 2.13873971 | 0.2780165 |
| A_55_P1956 | 134.6 Detected  | 230.4 Detected  | 3489.9 Detected | 3540.6 Detected | B4galnt2      | 26.30460624 | 25.9279346 | 15.3671875 | 15.147135 |
| A_52_P1685 | 3.1 Not Detect  | 7.9 Not Detect  | 20.3 Detected   | 81 Detected     | Cntnap2       | 26.12903226 | 6.5483871  | 10.2531646 | 2.5696203 |
| A_66_P1000 | 4.7 Not Detect  | 12.4 Not Detect | 6.5 Not Detect  | 122.3 Detected  | Klra7         | 26.0212766  | 1.38297872 | 9.86290323 | 0.5241935 |
| A_55_P1985 | 3.1 Not Detect  | 3.6 Not Detect  | 3.7 Not Detect  | 80.5 Detected   | Gm17767       | 25.96774194 | 1.19354839 | 22.3611111 | 1.0277778 |

|            |                 |                 |                  |                 |               |             |            |            |           |
|------------|-----------------|-----------------|------------------|-----------------|---------------|-------------|------------|------------|-----------|
| A_55_P2062 | 19.2 Detected   | 20 Detected     | 12.2 Not Detect  | 498.1 Compromis | Rad23b        | 25.94270833 | 0.63541667 | 24.905     | 0.61      |
| A_51_P4143 | 3.1 Not Detect  | 31 Detected     | 3.7 Not Detect   | 80.4 Detected   | Acot12        | 25.93548387 | 1.19354839 | 2.59354839 | 0.1193548 |
| A_51_P1942 | 2.9 Not Detect  | 3.4 Not Detect  | 3.4 Not Detect   | 74.6 Detected   | Zic1          | 25.72413793 | 1.17241379 | 21.9411765 | 1         |
| A_55_P2137 | 5.4 Not Detect  | 15.4 Not Detect | 3.6 Not Detect   | 138.6 Detected  | Srgap3        | 25.66666667 | 0.66666667 | 9          | 0.2337662 |
| A_55_P2117 | 2.8 Not Detect  | 3.2 Not Detect  | 3.3 Not Detect   | 71.8 Detected   | Gm4035        | 25.64285714 | 1.17857143 | 22.4375    | 1.03125   |
| A_55_P2011 | 10.1 Not Detect | 8 Not Detect    | 105.2 Detected   | 258.1 Detected  | Capn13        | 25.55445545 | 10.4158416 | 32.2625    | 13.15     |
| A_51_P1913 | 6.1 Not Detect  | 92.7 Detected   | 3.5 Not Detect   | 155.2 Detected  | Acot6         | 25.44262295 | 0.57377049 | 1.67421791 | 0.0377562 |
| A_51_P2098 | 7.1 Not Detect  | 7.3 Not Detect  | 4.4 Not Detect   | 179.7 Detected  | Ccdc79        | 25.30985915 | 0.61971831 | 24.6164384 | 0.6027397 |
| A_66_P1143 | 2.7 Not Detect  | 3.1 Not Detect  | 3.1 Not Detect   | 68 Detected     | Vmn1r180      | 25.18518519 | 1.14814815 | 21.9354839 | 1         |
| A_55_P2037 | 14.5 Detected   | 29.2 Detected   | 31.7 Detected    | 362.6 Detected  | H2-Q10        | 25.00689655 | 2.1862069  | 12.4178082 | 1.0856164 |
| A_55_P2006 | 106.7 Detected  | 132.6 Detected  | 935.7 Detected   | 2663.4 Detected | Gm7969        | 24.96157451 | 8.76944705 | 20.0859729 | 7.0565611 |
| A_52_P2138 | 3 Not Detect    | 3.7 Not Detect  | 3.6 Not Detect   | 74.7 Detected   | Olf228        | 24.9        | 1.2        | 20.1891892 | 0.972973  |
| A_55_P1977 | 18.1 Detected   | 19.2 Detected   | 976.5 Detected   | 450.4 Detected  | Cyp2c67       | 24.8839779  | 53.9502762 | 23.4583333 | 50.859375 |
| A_55_P1963 | 7.7 Not Detect  | 7 Not Detect    | 6.5 Not Detect   | 191 Detected    | Prl3c1        | 24.80519481 | 0.84415584 | 27.2857143 | 0.9285714 |
| A_52_P1974 | 10.9 Not Detect | 53 Detected     | 71.8 Detected    | 269.7 Detected  | Tbc1d30       | 24.74311927 | 6.58715596 | 5.08867925 | 1.354717  |
| A_55_P2090 | 1736.7 Detected | 7443.4 Detected | 13512.2 Detected | 42719 Detected  | Myh14         | 24.59780043 | 7.78038809 | 5.73917833 | 1.8153263 |
| A_52_P5204 | 30.4 Detected   | 50.4 Detected   | 529.4 Detected   | 747.5 Detected  | Vcam1         | 24.58881579 | 17.4144737 | 14.8313492 | 10.503968 |
| A_55_P2007 | 14 Detected     | 41.5 Detected   | 454.3 Detected   | 344 Detected    | Akr1c14       | 24.57142857 | 32.45      | 8.28915663 | 10.946988 |
| A_55_P2017 | 4.2 Not Detect  | 3.2 Not Detect  | 3.2 Not Detect   | 102.7 Detected  | Sly           | 24.45238095 | 0.76190476 | 32.09375   | 1         |
| A_55_P2163 | 3.1 Not Detect  | 10.1 Not Detect | 7.2 Not Detect   | 75.6 Detected   | Gm10220       | 24.38709677 | 2.32258065 | 7.48514851 | 0.7128713 |
| A_51_P4599 | 2.6 Not Detect  | 2.9 Not Detect  | 15.8 Detected    | 63.4 Detected   | Olf56         | 24.38461538 | 6.07692308 | 21.862069  | 5.4482759 |
| A_55_P2072 | 44.4 Detected   | 888.5 Detected  | 259.2 Detected   | 1079.2 Detected | Prex1         | 24.30630631 | 5.83783784 | 1.2146314  | 0.2917276 |
| A_55_P2348 | 2.9 Not Detect  | 3.6 Not Detect  | 3.5 Not Detect   | 70.4 Detected   | 4933417O13Rik | 24.27586207 | 1.20689655 | 19.5555556 | 0.9722222 |
| A_51_P4812 | 9.1 Not Detect  | 53.8 Detected   | 361.9 Detected   | 220.7 Detected  | Bace2         | 24.25274725 | 39.7692308 | 4.10223048 | 6.7267658 |
| A_55_P1965 | 58.4 Detected   | 837.9 Detected  | 250 Detected     | 1416 Detected   | Dsc2          | 24.24657534 | 4.28082192 | 1.68993913 | 0.298365  |
| A_55_P2119 | 3 Not Detect    | 3.7 Not Detect  | 3.7 Not Detect   | 72.3 Detected   | Gm5737        | 24.1        | 1.23333333 | 19.5405405 | 1         |
| A_52_P6298 | 4.9 Not Detect  | 15.1 Not Detect | 109.3 Detected   | 118 Detected    | Adh1          | 24.08163265 | 22.3061224 | 7.81456954 | 7.2384106 |
| A_52_P6841 | 5.1 Not Detect  | 34 Detected     | 23.1 Detected    | 122.8 Detected  | Dpf3          | 24.07843137 | 4.52941176 | 3.61176471 | 0.6794118 |
| A_52_P1066 | 18.8 Detected   | 210 Detected    | 406.6 Detected   | 452.2 Detected  | Tnfrsf11b     | 24.05319149 | 21.6276596 | 2.15333333 | 1.9361905 |
| A_55_P1953 | 9.6 Not Detect  | 11.8 Not Detect | 8.7 Not Detect   | 230.7 Detected  | Olf1262       | 24.03125    | 0.90625    | 19.5508475 | 0.7372881 |
| A_55_P2412 | 3.1 Not Detect  | 4.5 Not Detect  | 7.3 Not Detect   | 73.9 Detected   | AW111846      | 23.83870968 | 2.35483871 | 16.4222222 | 1.6222222 |
| A_55_P2148 | 199.7 Detected  | 652.2 Detected  | 1557.2 Detected  | 4722.4 Detected | Ncmap         | 23.64747121 | 7.79769654 | 7.2407237  | 2.3876112 |
| A_52_P3004 | 69.1 Detected   | 85.8 Detected   | 1353.8 Detected  | 1632 Detected   | Tcf23         | 23.61794501 | 19.5918958 | 19.020979  | 15.778555 |
| A_55_P2019 | 30.8 Detected   | 667.6 Detected  | 502.8 Detected   | 726.7 Detected  | Car12         | 23.59415584 | 16.3246753 | 1.08852606 | 0.7531456 |
| A_52_P1753 | 143.5 Detected  | 480.9 Detected  | 3190.9 Detected  | 3381.1 Detected | Tfcp2l1       | 23.56167247 | 22.2362369 | 7.03077563 | 6.6352672 |
| A_51_P4782 | 3 Not Detect    | 3.6 Not Detect  | 3.6 Not Detect   | 70.4 Detected   | Tdrd1         | 23.46666667 | 1.2        | 19.5555556 | 1         |
| A_51_P1654 | 40.8 Detected   | 158.5 Detected  | 558.8 Detected   | 956.5 Detected  | Pblid2        | 23.44362745 | 13.6960784 | 6.03470032 | 3.5255521 |
| A_55_P2094 | 2.6 Not Detect  | 2.9 Not Detect  | 3 Not Detect     | 60.8 Detected   | Gm10367       | 23.38461538 | 1.15384615 | 20.9655172 | 1.0344828 |
| A_55_P1974 | 3.3 Not Detect  | 8.3 Not Detect  | 3.6 Not Detect   | 77.1 Detected   | Fsip2         | 23.36363636 | 1.09090909 | 9.28915663 | 0.4337349 |
| A_66_P1364 | 2.9 Not Detect  | 3.6 Not Detect  | 3.5 Not Detect   | 67.3 Detected   | Gm2287        | 23.20689655 | 1.20689655 | 18.6944444 | 0.9722222 |

|            |                 |                 |                  |                  |               |             |            |            |           |
|------------|-----------------|-----------------|------------------|------------------|---------------|-------------|------------|------------|-----------|
| A_55_P2076 | 45.3 Detected   | 41.8 Detected   | 40.5 Detected    | 1048.5 Compromis | Plekho2       | 23.14569536 | 0.89403974 | 25.0837321 | 0.9688995 |
| A_55_P2342 | 2.9 Not Detect  | 3.5 Not Detect  | 3.5 Not Detect   | 67 Detected      | Sorbs2os      | 23.10344828 | 1.20689655 | 19.1428571 | 1         |
| A_55_P2011 | 52.8 Detected   | 34.3 Detected   | 197.2 Detected   | 1215.3 Detected  | Tspan12       | 23.01704545 | 3.73484848 | 35.4314869 | 5.7492711 |
| A_55_P2091 | 5.7 Not Detect  | 26.8 Detected   | 44.4 Detected    | 131 Detected     | 4933407118Rik | 22.98245614 | 7.78947368 | 4.8880597  | 1.6567164 |
| A_55_P1986 | 7.7 Not Detect  | 4.2 Not Detect  | 4.6 Not Detect   | 176.9 Detected   | Pnpo          | 22.97402597 | 0.5974026  | 42.1190476 | 1.0952381 |
| A_55_P1980 | 10.8 Not Detect | 64.6 Detected   | 33.8 Detected    | 247.9 Detected   | Hnf4g         | 22.9537037  | 3.12962963 | 3.8374613  | 0.5232198 |
| A_55_P1989 | 11.9 Not Detect | 16.6 Detected   | 18.1 Detected    | 273 Detected     | Slco1a1       | 22.94117647 | 1.5210084  | 16.4457831 | 1.0903614 |
| A_55_P2079 | 2.9 Not Detect  | 3.3 Not Detect  | 3.4 Not Detect   | 66.3 Detected    | Olfr108       | 22.86206897 | 1.17241379 | 20.0909091 | 1.030303  |
| A_55_P2056 | 5.4 Not Detect  | 8.4 Not Detect  | 6.4 Not Detect   | 123.2 Detected   | Vmn1r148      | 22.81481481 | 1.18518519 | 14.6666667 | 0.7619048 |
| A_52_P2678 | 142.9 Detected  | 1743.4 Detected | 735.3 Detected   | 3234.8 Detected  | Ces2g         | 22.63680896 | 5.14555633 | 1.85545486 | 0.4217621 |
| A_55_P2181 | 2.8 Not Detect  | 3.2 Not Detect  | 3.2 Not Detect   | 63.3 Detected    | Olfr1037      | 22.60714286 | 1.14285714 | 19.78125   | 1         |
| A_55_P2321 | 4.8 Not Detect  | 3.8 Not Detect  | 3.8 Not Detect   | 108 Detected     | AI314760      | 22.5        | 0.79166667 | 28.4210526 | 1         |
| A_51_P4971 | 19.2 Detected   | 347.1 Detected  | 1093.4 Detected  | 431.3 Detected   | Ly9           | 22.46354167 | 56.9479167 | 1.24258139 | 3.1501008 |
| A_66_P1034 | 4.8 Not Detect  | 7.4 Not Detect  | 3.5 Not Detect   | 107.8 Detected   | Vmn2r26       | 22.45833333 | 0.72916667 | 14.5675676 | 0.472973  |
| A_51_P3700 | 334.8 Detected  | 1515.8 Detected | 121 Detected     | 7490.8 Detected  | Ceacam18      | 22.3739546  | 0.3614098  | 4.9418129  | 0.0798258 |
| A_52_P6985 | 2.7 Not Detect  | 3.1 Not Detect  | 3.2 Not Detect   | 60.3 Detected    | 2610028E06Rik | 22.33333333 | 1.18518519 | 19.4516129 | 1.0322581 |
| A_52_P9615 | 4.9 Not Detect  | 4.9 Not Detect  | 7.8 Not Detect   | 108.7 Detected   | Dsg2          | 22.18367347 | 1.59183673 | 22.1836735 | 1.5918367 |
| A_51_P1876 | 15.1 Detected   | 20.2 Detected   | 21.8 Detected    | 334.6 Detected   | Cabp2         | 22.1589404  | 1.44370861 | 16.5643564 | 1.0792079 |
| A_55_P2360 | 3.2 Not Detect  | 10.3 Not Detect | 5.5 Not Detect   | 70.7 Detected    | 4833411C07Rik | 22.09375    | 1.71875    | 6.86407767 | 0.5339806 |
| A_52_P3354 | 3 Not Detect    | 3.5 Not Detect  | 3.5 Not Detect   | 66.2 Detected    | Dscaml1       | 22.06666667 | 1.16666667 | 18.9142857 | 1         |
| A_51_P1014 | 559.8 Detected  | 1056.4 Detected | 7767.8 Detected  | 12267.3 Detected | Dsp           | 21.91371919 | 13.8760272 | 11.6123627 | 7.353086  |
| A_55_P2287 | 3 Not Detect    | 3.7 Not Detect  | 3.6 Not Detect   | 65.1 Detected    | 4930519N06Rik | 21.7        | 1.2        | 17.5945946 | 0.972973  |
| A_52_P4564 | 2.8 Not Detect  | 3.3 Not Detect  | 3.3 Not Detect   | 60.3 Detected    | Ccdc81        | 21.53571429 | 1.17857143 | 18.2727273 | 1         |
| A_51_P2974 | 2.9 Not Detect  | 3.4 Not Detect  | 3.4 Not Detect   | 62.4 Detected    | Plcz1         | 21.51724138 | 1.17241379 | 18.3529412 | 1         |
| A_55_P2289 | 2.9 Not Detect  | 3.4 Not Detect  | 3.4 Not Detect   | 62.2 Detected    | 1700121L16Rik | 21.44827586 | 1.17241379 | 18.2941176 | 1         |
| A_55_P2034 | 2.7 Not Detect  | 16.1 Detected   | 6 Not Detect     | 57.9 Detected    | Sema6a        | 21.44444444 | 2.22222222 | 3.59627329 | 0.3726708 |
| A_51_P3261 | 9.2 Not Detect  | 3.3 Not Detect  | 3.3 Not Detect   | 196.8 Detected   | Serpina3g     | 21.39130435 | 0.35869565 | 59.6363636 | 1         |
| A_55_P2422 | 5.7 Not Detect  | 17.8 Not Detect | 195.3 Detected   | 121.3 Detected   | 9230112J17Rik | 21.28070175 | 34.2631579 | 6.81460674 | 10.97191  |
| A_52_P7312 | 5.6 Not Detect  | 5.6 Not Detect  | 3.8 Not Detect   | 118.9 Detected   | Epb4.2        | 21.23214286 | 0.67857143 | 21.2321429 | 0.6785714 |
| A_51_P2301 | 34.1 Detected   | 36.7 Detected   | 35.3 Detected    | 723.9 Compromis  | A930018P22Rik | 21.228739   | 1.03519062 | 19.7247956 | 0.9618529 |
| A_55_P1957 | 2.6 Not Detect  | 6.9 Not Detect  | 3 Not Detect     | 55.1 Detected    | Gm14374       | 21.19230769 | 1.15384615 | 7.98550725 | 0.4347826 |
| A_51_P2562 | 1150.1 Detected | 8328 Detected   | 14475.7 Detected | 24339.6 Detected | Tspan13       | 21.1630293  | 12.5864707 | 2.92262248 | 1.7381964 |
| A_55_P2163 | 3.1 Not Detect  | 19 Detected     | 18.9 Not Detect  | 65.6 Detected    | Jph1          | 21.16129032 | 6.09677419 | 3.45263158 | 0.9947368 |
| A_51_P3590 | 790.7 Detected  | 969.7 Detected  | 11116.9 Detected | 16710.3 Detected | Slurp1        | 21.13355255 | 14.0595675 | 17.232443  | 11.464267 |
| A_51_P2109 | 932.2 Detected  | 1404.4 Detected | 13163.8 Detected | 19650.1 Detected | Vcam1         | 21.07927483 | 14.1212186 | 13.9918114 | 9.3732555 |
| A_55_P2340 | 16.5 Detected   | 14.1 Not Detect | 13.2 Not Detect  | 347.8 Detected   | Ppp1r12b      | 21.07878788 | 0.8        | 24.6666667 | 0.9361702 |
| A_55_P1954 | 2.6 Not Detect  | 2.9 Not Detect  | 3 Not Detect     | 54.7 Detected    | Il1rapl2      | 21.03846154 | 1.15384615 | 18.862069  | 1.0344828 |
| A_55_P2157 | 2.8 Not Detect  | 3.4 Not Detect  | 3.4 Not Detect   | 58.6 Detected    | Gpr158        | 20.92857143 | 1.21428571 | 17.2352941 | 1         |
| A_55_P2413 | 67.8 Detected   | 220.2 Detected  | 1599.2 Detected  | 1417.3 Detected  | Tfcp2l1       | 20.90412979 | 23.5870206 | 6.43642144 | 7.2624886 |
| A_51_P2166 | 1861.4 Detected | 9723.7 Detected | 19945.4 Detected | 38873 Detected   | Anxa10        | 20.88374342 | 10.7152681 | 3.99775806 | 2.0512151 |

|            |                 |                 |                 |                  |               |             |            |            |           |
|------------|-----------------|-----------------|-----------------|------------------|---------------|-------------|------------|------------|-----------|
| A_55_P2364 | 158.4 Detected  | 136.6 Detected  | 1367.2 Detected | 3302.4 Detected  | 8030402F09Rik | 20.84848485 | 8.63131313 | 24.1756955 | 10.008785 |
| A_55_P2157 | 40.2 Detected   | 231.6 Detected  | 214.1 Detected  | 836.8 Detected   | Bcl2l14       | 20.8159204  | 5.32587065 | 3.61312608 | 0.9244387 |
| A_55_P2138 | 2.7 Not Detect  | 5.8 Not Detect  | 4 Not Detect    | 56.1 Detected    | Samd7         | 20.77777778 | 1.48148148 | 9.67241379 | 0.6896552 |
| A_55_P2011 | 3.1 Not Detect  | 3.8 Not Detect  | 3.8 Not Detect  | 63.8 Detected    | Nlrp4b        | 20.58064516 | 1.22580645 | 16.7894737 | 1         |
| A_55_P2121 | 6.4 Not Detect  | 11.9 Not Detect | 9.5 Not Detect  | 131.3 Detected   | Plcb4         | 20.515625   | 1.484375   | 11.0336134 | 0.7983193 |
| A_55_P2000 | 3 Not Detect    | 3.5 Not Detect  | 3.6 Not Detect  | 61.5 Detected    | Skor1         | 20.5        | 1.2        | 17.5714286 | 1.0285714 |
| A_51_P4587 | 41.9 Detected   | 2869 Detected   | 3.4 Not Detect  | 858.9 Detected   | Hpgd          | 20.49880668 | 0.08114558 | 0.2993726  | 0.0011851 |
| A_51_P1448 | 123.4 Detected  | 30.4 Detected   | 1143.6 Detected | 2526.2 Detected  | 9230104L09Rik | 20.47163695 | 9.26742301 | 83.0986842 | 37.618421 |
| A_55_P2012 | 2.9 Not Detect  | 3.4 Not Detect  | 3.4 Not Detect  | 58.6 Detected    | Vmn1r121      | 20.20689655 | 1.17241379 | 17.2352941 | 1         |
| A_55_P2029 | 211.7 Detected  | 1071.5 Detected | 4189.9 Detected | 4267 Detected    | Cdh2          | 20.15588096 | 19.7916863 | 3.98226785 | 3.9103126 |
| A_55_P2272 | 3.1 Not Detect  | 3.4 Not Detect  | 3.4 Not Detect  | 62.4 Detected    | 4933416O17Rik | 20.12903226 | 1.09677419 | 18.3529412 | 1         |
| A_51_P3242 | 18.5 Detected   | 39.1 Detected   | 21.1 Detected   | 372 Detected     | Satb1         | 20.10810811 | 1.14054054 | 9.5140665  | 0.5396419 |
| A_51_P3757 | 5.2 Not Detect  | 3.6 Not Detect  | 9.6 Not Detect  | 104.5 Detected   | Hoxc10        | 20.09615385 | 1.84615385 | 29.0277778 | 2.6666667 |
| A_52_P5747 | 62.3 Detected   | 76.5 Detected   | 807 Detected    | 1237.3 Detected  | Rbpjl         | 19.86035313 | 12.953451  | 16.1738562 | 10.54902  |
| A_55_P2112 | 7.1 Not Detect  | 28.5 Detected   | 129.6 Detected  | 141 Detected     | Adh6a         | 19.85915493 | 18.2535211 | 4.94736842 | 4.5473684 |
| A_55_P2095 | 558.8 Detected  | 1581.1 Detected | 4200.5 Detected | 11076.5 Detected | Ncmap         | 19.82193987 | 7.51700072 | 7.00556575 | 2.6566947 |
| A_52_P1046 | 16.8 Detected   | 1659.2 Detected | 28.4 Detected   | 332.5 Detected   | Krt6a         | 19.79166667 | 1.69047619 | 0.20039778 | 0.0171167 |
| A_55_P2125 | 3.1 Not Detect  | 20.7 Detected   | 3.8 Not Detect  | 61.2 Detected    | Gm21064       | 19.74193548 | 1.22580645 | 2.95652174 | 0.1835749 |
| A_52_P4233 | 6.3 Not Detect  | 8.1 Not Detect  | 7 Not Detect    | 123.3 Detected   | Mos           | 19.57142857 | 1.11111111 | 15.2222222 | 0.8641975 |
| A_55_P2119 | 5 Not Detect    | 73.5 Detected   | 21.1 Detected   | 97.8 Detected    | Ikzf4         | 19.56       | 4.22       | 1.33061224 | 0.2870748 |
| A_51_P3899 | 752.9 Detected  | 4559.4 Detected | 6244.4 Detected | 14689.5 Detected | Slc40a1       | 19.51055917 | 8.29379732 | 3.2218055  | 1.3695662 |
| A_52_P2091 | 8 Not Detect    | 15 Not Detect   | 3.6 Not Detect  | 156 Detected     | Ncam2         | 19.5        | 0.45       | 10.4       | 0.24      |
| A_55_P1977 | 2.8 Not Detect  | 3.1 Not Detect  | 6.4 Not Detect  | 54.4 Detected    | Dab2          | 19.42857143 | 2.28571429 | 17.5483871 | 2.0645161 |
| A_52_P3911 | 14.2 Detected   | 46.4 Detected   | 42.4 Detected   | 275.5 Detected   | Ryr1          | 19.40140845 | 2.98591549 | 5.9375     | 0.9137931 |
| A_55_P1977 | 3 Not Detect    | 3.5 Not Detect  | 3.6 Not Detect  | 58.1 Detected    | Gm3669        | 19.36666667 | 1.2        | 16.6       | 1.0285714 |
| A_66_P1321 | 3.1 Not Detect  | 3.8 Not Detect  | 3.8 Not Detect  | 60 Detected      | Gm536         | 19.35483871 | 1.22580645 | 15.7894737 | 1         |
| A_51_P4603 | 10.4 Not Detect | 4.9 Not Detect  | 41.2 Detected   | 200.6 Detected   | Apoc4         | 19.28846154 | 3.96153846 | 40.9387755 | 8.4081633 |
| A_55_P1966 | 13.7 Detected   | 21 Detected     | 17.9 Detected   | 263.8 Detected   | Krt83         | 19.25547445 | 1.30656934 | 12.5619048 | 0.852381  |
| A_51_P2195 | 2.8 Not Detect  | 3.3 Not Detect  | 3.3 Not Detect  | 53.9 Detected    | 1700123K08Rik | 19.25       | 1.17857143 | 16.3333333 | 1         |
| A_55_P2009 | 3.7 Not Detect  | 9.4 Not Detect  | 3.8 Not Detect  | 70.8 Detected    | LOC101055773  | 19.13513514 | 1.02702703 | 7.53191489 | 0.4042553 |
| A_51_P3513 | 5.2 Not Detect  | 34 Detected     | 3.3 Not Detect  | 99.4 Detected    | Upk2          | 19.11538462 | 0.63461538 | 2.92352941 | 0.0970588 |
| A_55_P2000 | 140 Detected    | 712.1 Detected  | 2583.6 Detected | 2672.6 Detected  | Cdh2          | 19.09       | 18.4542857 | 3.75312456 | 3.6281421 |
| A_52_P3828 | 7.8 Not Detect  | 849.3 Detected  | 6.5 Not Detect  | 148.7 Detected   | Gjb2          | 19.06410256 | 0.83333333 | 0.17508536 | 0.0076534 |
| A_66_P1075 | 17.7 Detected   | 15 Not Detect   | 26.5 Detected   | 337.3 Detected   | Rhox3a        | 19.05649718 | 1.49717514 | 22.4866667 | 1.7666667 |
| A_52_P3864 | 2.9 Not Detect  | 8.4 Not Detect  | 4.6 Not Detect  | 55.2 Detected    | Gpa33         | 19.03448276 | 1.5862069  | 6.57142857 | 0.547619  |
| A_51_P4347 | 286.6 Detected  | 151.9 Detected  | 3641.6 Detected | 5453.3 Detected  | Fam83e        | 19.02756455 | 12.7062107 | 35.9005925 | 23.973667 |
| A_52_P6470 | 9 Not Detect    | 74.2 Detected   | 598.1 Detected  | 170.8 Detected   | Foxa3         | 18.97777778 | 66.4555556 | 2.30188679 | 8.0606469 |
| A_52_P1939 | 69.8 Detected   | 186 Detected    | 327.1 Detected  | 1321.4 Detected  | Sulf2         | 18.93123209 | 4.68624642 | 7.10430108 | 1.7586022 |
| A_55_P2037 | 150 Detected    | 384.4 Detected  | 2047.1 Detected | 2837 Detected    | Slc22a18      | 18.91333333 | 13.6473333 | 7.38033299 | 5.3254422 |
| A_51_P3953 | 29.1 Detected   | 41.7 Detected   | 42.6 Detected   | 548.4 Detected   | Ptprt         | 18.84536082 | 1.46391753 | 13.1510791 | 1.0215827 |

|            |       |            |        |            |        |            |        |           |               |             |            |            |           |
|------------|-------|------------|--------|------------|--------|------------|--------|-----------|---------------|-------------|------------|------------|-----------|
| A_51_P4515 | 26.3  | Detected   | 29     | Detected   | 16     | Not Detect | 494.7  | Compromis | Plekhhb1      | 18.80988593 | 0.60836502 | 17.0586207 | 0.5517241 |
| A_55_P2187 | 3     | Not Detect | 3.7    | Not Detect | 3.7    | Not Detect | 56.4   | Detected  | 1700096J18Rik | 18.8        | 1.23333333 | 15.2432432 | 1         |
| A_66_P1382 | 9.9   | Not Detect | 7      | Not Detect | 8.7    | Not Detect | 185    | Detected  | Gm4371        | 18.68686869 | 0.87878788 | 26.4285714 | 1.2428571 |
| A_51_P2556 | 242.6 | Detected   | 2693.6 | Detected   | 4526.7 | Detected   | 4515.7 | Detected  | 2210011C24Rik | 18.61376752 | 18.6591096 | 1.6764553  | 1.6805391 |
| A_52_P5906 | 3.1   | Not Detect | 5.3    | Not Detect | 16     | Not Detect | 57.7   | Detected  | Nlrp10        | 18.61290323 | 5.16129032 | 10.8867925 | 3.0188679 |
| A_52_P4136 | 3.1   | Not Detect | 44.8   | Detected   | 28.8   | Detected   | 57.7   | Detected  | Bmp6          | 18.61290323 | 9.29032258 | 1.28794643 | 0.6428571 |
| A_51_P3865 | 8     | Not Detect | 478.4  | Detected   | 4      | Not Detect | 148.6  | Detected  | Rnf125        | 18.575      | 0.5        | 0.31061873 | 0.0083612 |
| A_52_P4753 | 3     | Not Detect | 14.9   | Not Detect | 3.6    | Not Detect | 55.5   | Detected  | Sox6          | 18.5        | 1.2        | 3.72483221 | 0.2416107 |
| A_55_P2071 | 6     | Not Detect | 8.8    | Not Detect | 74.9   | Detected   | 110.7  | Detected  | Fer114        | 18.45       | 12.4833333 | 12.5795455 | 8.5113636 |
| A_52_P6523 | 3     | Not Detect | 8.6    | Not Detect | 8      | Not Detect | 55.3   | Detected  | Lhx1          | 18.43333333 | 2.66666667 | 6.43023256 | 0.9302326 |
| A_55_P1979 | 179.8 | Detected   | 344.6  | Detected   | 3622.3 | Detected   | 3310.2 | Detected  | Clic3         | 18.41045606 | 20.1462736 | 9.60591991 | 10.511608 |
| A_52_P2691 | 2.8   | Not Detect | 3.3    | Not Detect | 3.3    | Not Detect | 51.4   | Detected  | Pid1          | 18.35714286 | 1.17857143 | 15.5757576 | 1         |
| A_51_P1184 | 2.7   | Not Detect | 19.8   | Detected   | 5.8    | Not Detect | 49.5   | Detected  | Themis3       | 18.33333333 | 2.14814815 | 2.5        | 0.2929293 |
| A_52_P4427 | 3.1   | Not Detect | 18.8   | Not Detect | 4.3    | Not Detect | 56.2   | Detected  | Ndnf          | 18.12903226 | 1.38709677 | 2.9893617  | 0.2287234 |
| A_55_P1964 | 8     | Not Detect | 111.2  | Detected   | 24.6   | Detected   | 144.9  | Detected  | Zmynd12       | 18.1125     | 3.075      | 1.30305755 | 0.221223  |
| A_55_P1992 | 60.7  | Detected   | 39.6   | Detected   | 122.4  | Detected   | 1097   | Detected  | Slx           | 18.07248764 | 2.01647446 | 27.7020202 | 3.0909091 |
| A_55_P2029 | 218.3 | Detected   | 656.7  | Detected   | 1865   | Detected   | 3945.1 | Detected  | Stk32a        | 18.07191938 | 8.54328905 | 6.00746155 | 2.8399574 |
| A_51_P4525 | 4.2   | Not Detect | 21     | Detected   | 60.2   | Detected   | 75.9   | Detected  | Zfp459        | 18.07142857 | 14.3333333 | 3.61428571 | 2.8666667 |
| A_51_P1855 | 2.9   | Not Detect | 3.6    | Not Detect | 42.3   | Detected   | 52.4   | Detected  | Ankdd1b       | 18.06896552 | 14.5862069 | 14.5555556 | 11.75     |
| A_55_P2190 | 2.9   | Not Detect | 26.2   | Detected   | 5.1    | Not Detect | 52.4   | Detected  | 9130007G19Rik | 18.06896552 | 1.75862069 | 2          | 0.1946565 |
| A_55_P2109 | 12.4  | Not Detect | 52.7   | Detected   | 94.7   | Detected   | 223.8  | Detected  | Ache          | 18.0483871  | 7.63709677 | 4.24667932 | 1.7969639 |
| A_55_P2043 | 38.5  | Detected   | 305.4  | Detected   | 703.6  | Detected   | 692.9  | Detected  | Zfp677        | 17.9974026  | 18.2753247 | 2.26882777 | 2.3038638 |
| A_52_P2817 | 3.9   | Not Detect | 39     | Detected   | 3.6    | Not Detect | 70.1   | Detected  | Igfbp5        | 17.97435897 | 0.92307692 | 1.7974359  | 0.0923077 |
| A_55_P2069 | 2.9   | Not Detect | 3      | Not Detect | 3.1    | Not Detect | 51.9   | Detected  | Sprp2b        | 17.89655172 | 1.06896552 | 17.3       | 1.0333333 |
| A_52_P3765 | 2.7   | Not Detect | 3.1    | Not Detect | 3.2    | Not Detect | 48.3   | Detected  | Clec16a       | 17.88888889 | 1.18518519 | 15.5806452 | 1.0322581 |
| A_55_P2099 | 27.7  | Detected   | 87.3   | Detected   | 159.8  | Detected   | 495.3  | Detected  | Neil2         | 17.88086643 | 5.76895307 | 5.67353952 | 1.8304696 |
| A_55_P1972 | 3.1   | Not Detect | 6.7    | Not Detect | 3.8    | Not Detect | 55.2   | Detected  | Nox4          | 17.80645161 | 1.22580645 | 8.23880597 | 0.5671642 |
| A_52_P6164 | 2.7   | Not Detect | 6      | Not Detect | 3.1    | Not Detect | 47.9   | Detected  | Ccdc73        | 17.74074074 | 1.14814815 | 7.98333333 | 0.5166667 |
| A_55_P2083 | 5.2   | Not Detect | 21     | Detected   | 23.1   | Detected   | 91.8   | Detected  | Robo2         | 17.65384615 | 4.44230769 | 4.37142857 | 1.1       |
| A_55_P2158 | 2.7   | Not Detect | 3.2    | Not Detect | 88.6   | Detected   | 47.5   | Detected  | Cyp2c54       | 17.59259259 | 32.8148148 | 14.84375   | 27.6875   |
| A_55_P1984 | 3.4   | Not Detect | 3.4    | Not Detect | 3.5    | Not Detect | 59.8   | Detected  | Klk1b16       | 17.58823529 | 1.02941176 | 17.5882353 | 1.0294118 |
| A_55_P2157 | 237.7 | Detected   | 724.4  | Detected   | 7250.5 | Detected   | 4173.2 | Detected  | Bace2         | 17.55658393 | 30.5027345 | 5.76090558 | 10.008973 |
| A_55_P2130 | 2.7   | Not Detect | 13.3   | Not Detect | 9.1    | Not Detect | 47.4   | Detected  | Chrna1        | 17.55555556 | 3.37037037 | 3.56390977 | 0.6842105 |
| A_51_P2051 | 29    | Detected   | 124.5  | Detected   | 73.9   | Detected   | 507.1  | Detected  | Mlf1          | 17.4862069  | 2.54827586 | 4.07309237 | 0.5935743 |
| A_52_P3203 | 2.7   | Not Detect | 13.3   | Not Detect | 31.7   | Detected   | 46.7   | Detected  | Mrgprb3       | 17.2962963  | 11.7407407 | 3.5112782  | 2.3834586 |
| A_55_P1972 | 3     | Not Detect | 5.5    | Not Detect | 3.7    | Not Detect | 51.8   | Detected  | Gm15340       | 17.26666667 | 1.23333333 | 9.41818182 | 0.6727273 |
| A_66_P1151 | 3.1   | Not Detect | 3.8    | Not Detect | 9.2    | Not Detect | 53.4   | Detected  | Spag8         | 17.22580645 | 2.96774194 | 14.0526316 | 2.4210526 |
| A_51_P2754 | 2.8   | Not Detect | 3.3    | Not Detect | 3.3    | Not Detect | 48.2   | Detected  | Trim30a       | 17.21428571 | 1.17857143 | 14.6060606 | 1         |
| A_52_P1630 | 4.6   | Not Detect | 22.7   | Detected   | 3.6    | Not Detect | 79     | Detected  | Slc17a8       | 17.17391304 | 0.7826087  | 3.48017621 | 0.1585903 |
| A_55_P2039 | 16.7  | Detected   | 1330.1 | Detected   | 687.9  | Detected   | 286.8  | Detected  | Frrmpd1       | 17.17365269 | 41.1916168 | 0.21562289 | 0.5171792 |

|            |                 |                 |                 |                 |               |             |            |            |           |
|------------|-----------------|-----------------|-----------------|-----------------|---------------|-------------|------------|------------|-----------|
| A_55_P2042 | 2.9 Not Detect  | 12.6 Not Detect | 3.2 Not Detect  | 49.8 Detected   | 1010001N08Rik | 17.17241379 | 1.10344828 | 3.95238095 | 0.2539683 |
| A_55_P2069 | 4.3 Not Detect  | 3.5 Not Detect  | 3.2 Not Detect  | 73.8 Detected   | Olf346        | 17.1627907  | 0.74418605 | 21.0857143 | 0.9142857 |
| A_55_P2098 | 6.3 Not Detect  | 11.4 Not Detect | 3.6 Not Detect  | 107.9 Detected  | Gm6600        | 17.12698413 | 0.57142857 | 9.46491228 | 0.3157895 |
| A_51_P2579 | 152.1 Detected  | 1310.4 Detected | 863.3 Detected  | 2600.2 Detected | Tnfsf13b      | 17.09533202 | 5.67587114 | 1.98427961 | 0.6588065 |
| A_51_P3312 | 5.6 Not Detect  | 22.1 Detected   | 328.1 Detected  | 95.5 Detected   | Akr1b7        | 17.05357143 | 58.5892857 | 4.32126697 | 14.846154 |
| A_55_P1998 | 64.2 Detected   | 46.5 Detected   | 94.7 Detected   | 1093.4 Detected | Gm2030        | 17.03115265 | 1.47507788 | 23.5139785 | 2.0365591 |
| A_55_P2314 | 9.7 Not Detect  | 14.3 Not Detect | 6.9 Not Detect  | 165.2 Detected  | C130012C08Rik | 17.03092784 | 0.71134021 | 11.5524476 | 0.4825175 |
| A_51_P3041 | 2.7 Not Detect  | 2.9 Not Detect  | 37.2 Detected   | 45.9 Detected   | Cyp2c39       | 17          | 13.7777778 | 15.8275862 | 12.827586 |
| A_66_P1074 | 3 Not Detect    | 3.4 Not Detect  | 4.7 Not Detect  | 50.9 Detected   | 1700003E24Rik | 16.96666667 | 1.56666667 | 14.9705882 | 1.3823529 |
| A_55_P2111 | 111 Detected    | 1404.2 Detected | 245.5 Detected  | 1878 Detected   | Trpv6         | 16.91891892 | 2.21171171 | 1.33741632 | 0.1748326 |
| A_66_P1109 | 24.7 Detected   | 12.8 Not Detect | 18.9 Detected   | 417.3 Detected  | Ube3a         | 16.89473684 | 0.76518219 | 32.6015625 | 1.4765625 |
| A_51_P1675 | 2.9 Not Detect  | 3.4 Not Detect  | 3.4 Not Detect  | 48.9 Detected   | Lum           | 16.86206897 | 1.17241379 | 14.3823529 | 1         |
| A_55_P1956 | 2.8 Not Detect  | 3.3 Not Detect  | 3.4 Not Detect  | 47.2 Detected   | Smpx          | 16.85714286 | 1.21428571 | 14.3030303 | 1.030303  |
| A_65_P1983 | 10.3 Not Detect | 19 Detected     | 2941.2 Detected | 173.5 Detected  | Ttr           | 16.84466019 | 285.553398 | 9.13157895 | 154.8     |
| A_51_P4227 | 28.3 Detected   | 29.6 Detected   | 1386.1 Detected | 475.5 Detected  | C1ca3         | 16.80212014 | 48.9787986 | 16.0641892 | 46.827703 |
| A_55_P2097 | 257.5 Detected  | 1129.4 Detected | 2159.8 Detected | 4323.1 Detected | Gmfg          | 16.78873786 | 8.38757282 | 3.82778466 | 1.9123428 |
| A_55_P2069 | 10.7 Not Detect | 159.1 Detected  | 21.5 Detected   | 179.5 Detected  | Ptpn18        | 16.77570093 | 2.00934579 | 1.12822124 | 0.1351351 |
| A_55_P2012 | 2.8 Not Detect  | 3.3 Not Detect  | 3.3 Not Detect  | 46.9 Detected   | Kcnh4         | 16.75       | 1.17857143 | 14.2121212 | 1         |
| A_51_P4514 | 66.1 Detected   | 302.2 Detected  | 810.6 Detected  | 1107 Detected   | Marveld2      | 16.7473525  | 12.2632375 | 3.663137   | 2.6823296 |
| A_51_P2764 | 520.3 Detected  | 145.2 Detected  | 7408 Detected   | 8656.7 Detected | 4930486L24Rik | 16.63790121 | 14.2379397 | 59.619146  | 51.019284 |
| A_55_P2362 | 3 Not Detect    | 3.4 Not Detect  | 5.9 Not Detect  | 49.7 Detected   | Slc9a3        | 16.56666667 | 1.96666667 | 14.6176471 | 1.7352941 |
| A_51_P1635 | 40.2 Detected   | 7 Not Detect    | 1430.5 Detected | 665.4 Detected  | Ugt2b35       | 16.55223881 | 35.5845771 | 95.0571429 | 204.35714 |
| A_51_P2507 | 11.4 Not Detect | 146.2 Detected  | 10.9 Not Detect | 188.2 Detected  | G1rb          | 16.50877193 | 0.95614035 | 1.2872777  | 0.0745554 |
| A_55_P2005 | 19.6 Detected   | 176.4 Detected  | 72.5 Detected   | 321.9 Detected  | Ces2c         | 16.42346939 | 3.69897959 | 1.82482993 | 0.4109977 |
| A_55_P1990 | 5.1 Not Detect  | 3 Not Detect    | 3.1 Not Detect  | 83.7 Detected   | Vmn2r48       | 16.41176471 | 0.60784314 | 27.9       | 1.0333333 |
| A_55_P2046 | 84.1 Detected   | 1171 Detected   | 2455.2 Detected | 1377.3 Detected | Rcn3          | 16.37693222 | 29.1938169 | 1.17617421 | 2.0966695 |
| A_55_P2035 | 8.9 Not Detect  | 5.3 Not Detect  | 6.9 Not Detect  | 144.5 Detected  | Pla2g10       | 16.23595506 | 0.7752809  | 27.2641509 | 1.3018868 |
| A_52_P1885 | 41 Detected     | 231.8 Detected  | 133.3 Detected  | 665.5 Detected  | Ccdc149       | 16.23170732 | 3.25121951 | 2.87100949 | 0.5750647 |
| A_51_P1731 | 77.9 Detected   | 490.2 Detected  | 103.7 Detected  | 1251.9 Detected | Cdhr1         | 16.07060334 | 1.33119384 | 2.55385557 | 0.2115463 |
| A_51_P4364 | 23.8 Detected   | 135.4 Detected  | 3.8 Not Detect  | 382 Detected    | Lingo3        | 16.05042017 | 0.15966387 | 2.82127031 | 0.028065  |
| A_55_P1970 | 91.9 Detected   | 123.9 Detected  | 362.4 Detected  | 1475 Detected   | Hoxa13        | 16.05005441 | 3.94341676 | 11.9047619 | 2.9249395 |
| A_52_P3803 | 43.8 Detected   | 379.3 Detected  | 42.4 Detected   | 700.4 Detected  | Unc5c         | 15.99086758 | 0.96803653 | 1.84655945 | 0.1117849 |
| A_55_P2337 | 5.1 Not Detect  | 3.7 Not Detect  | 3.7 Not Detect  | 81.4 Detected   | Usmg2         | 15.96078431 | 0.7254902  | 22         | 1         |
| A_52_P8809 | 12.9 Not Detect | 36.7 Detected   | 139.3 Detected  | 205.2 Detected  | Dsg2          | 15.90697674 | 10.7984496 | 5.59128065 | 3.7956403 |
| A_52_P2353 | 2.8 Not Detect  | 10.5 Not Detect | 19.2 Detected   | 44.5 Not Detect | Fgf21         | 15.89285714 | 6.85714286 | 4.23809524 | 1.8285714 |
| A_55_P2028 | 2.7 Not Detect  | 3 Not Detect    | 3.1 Not Detect  | 42.8 Detected   | Adam22        | 15.85185185 | 1.14814815 | 14.2666667 | 1.0333333 |
| A_66_P1121 | 13.8 Not Detect | 9 Not Detect    | 47 Detected     | 218 Detected    | Gm4598        | 15.79710145 | 3.4057971  | 24.2222222 | 5.2222222 |
| A_51_P3435 | 102.5 Detected  | 651 Detected    | 55.8 Detected   | 1612.8 Detected | Ly6d          | 15.73463415 | 0.54439024 | 2.47741935 | 0.0857143 |
| A_55_P2000 | 42 Detected     | 219.3 Detected  | 311 Detected    | 659.8 Detected  | Tgfb1i1       | 15.70952381 | 7.4047619  | 3.00866393 | 1.4181487 |
| A_55_P2012 | 3.2 Not Detect  | 3.9 Not Detect  | 45.7 Detected   | 50.2 Not Detect | Spata6        | 15.6875     | 14.28125   | 12.8717949 | 11.717949 |

|            |                 |                  |                  |                  |               |             |            |            |           |
|------------|-----------------|------------------|------------------|------------------|---------------|-------------|------------|------------|-----------|
| A_52_P3802 | 10.7 Not Detect | 374.8 Detected   | 3.5 Not Detect   | 167.3 Detected   | Podxl         | 15.63551402 | 0.3271028  | 0.4463714  | 0.0093383 |
| A_55_P2075 | 519.5 Detected  | 2241.6 Detected  | 7042.5 Detected  | 8117.4 Detected  | Cd302         | 15.62540905 | 13.5563041 | 3.62125268 | 3.1417291 |
| A_51_P3720 | 3.5 Not Detect  | 8.8 Not Detect   | 3 Not Detect     | 54.6 Detected    | Tarm1         | 15.6        | 0.85714286 | 6.20454545 | 0.3409091 |
| A_51_P4119 | 104.5 Detected  | 666.3 Detected   | 3.8 Not Detect   | 1626.5 Detected  | Gata6         | 15.5645933  | 0.03636364 | 2.4410926  | 0.0057031 |
| A_55_P2183 | 12.2 Not Detect | 15.2 Not Detect  | 6.5 Not Detect   | 189.8 Detected   | Olf47         | 15.55737705 | 0.53278689 | 12.4868421 | 0.4276316 |
| A_52_P4668 | 322.9 Detected  | 1475.6 Detected  | 2813.2 Detected  | 5018 Detected    | Bmyc          | 15.54041499 | 8.71229483 | 3.40065058 | 1.9064787 |
| A_55_P2064 | 2.7 Not Detect  | 3 Not Detect     | 22.1 Detected    | 41.8 Not Detect  | Vipr1         | 15.48148148 | 8.18518519 | 13.9333333 | 7.3666667 |
| A_55_P1953 | 4.6 Not Detect  | 78.7 Detected    | 18.8 Detected    | 71.1 Detected    | Etv2          | 15.45652174 | 4.08695652 | 0.90343075 | 0.2388818 |
| A_51_P2655 | 31.7 Detected   | 171.7 Detected   | 53.7 Detected    | 489.5 Detected   | Adm           | 15.44164038 | 1.69400631 | 2.85090274 | 0.3127548 |
| A_55_P2018 | 5.6 Not Detect  | 9.7 Not Detect   | 4.2 Not Detect   | 86.3 Detected    | Olf1362       | 15.41071429 | 0.75       | 8.89690722 | 0.4329897 |
| A_55_P2009 | 4.7 Not Detect  | 3.7 Not Detect   | 10.3 Not Detect  | 72.4 Detected    | 4932414J04Rik | 15.40425532 | 2.19148936 | 19.5675676 | 2.7837838 |
| A_51_P4564 | 3.9 Not Detect  | 11 Not Detect    | 46.6 Detected    | 59.9 Detected    | Cldn10        | 15.35897436 | 11.9487179 | 5.44545455 | 4.2363636 |
| A_55_P2155 | 3.5 Not Detect  | 3.2 Not Detect   | 3.3 Not Detect   | 53.4 Detected    | Dytn          | 15.25714286 | 0.94285714 | 16.6875    | 1.03125   |
| A_55_P2009 | 50.7 Detected   | 10 Not Detect    | 20.4 Detected    | 764.1 Detected   | Xlr           | 15.07100592 | 0.40236686 | 76.41      | 2.04      |
| A_51_P4317 | 28.5 Detected   | 292.8 Detected   | 259.5 Detected   | 429 Detected     | Myom2         | 15.05263158 | 9.10526316 | 1.46516393 | 0.8862705 |
| A_55_P2092 | 15.2 Not Detect | 108.8 Detected   | 364.3 Detected   | 228.1 Detected   | Car9          | 15.00657895 | 23.9671053 | 2.09650735 | 3.3483456 |
| A_51_P1169 | 774 Detected    | 5337.1 Detected  | 8080.6 Detected  | 11600.4 Detected | Lad1          | 14.9875969  | 10.4400517 | 2.17353994 | 1.5140432 |
| A_55_P2081 | 8.1 Not Detect  | 13.7 Not Detect  | 144.5 Detected   | 121.1 Detected   | Pglyrp1       | 14.95061728 | 17.8395062 | 8.83941606 | 10.547445 |
| A_55_P2283 | 9 Not Detect    | 18.9 Detected    | 12.5 Not Detect  | 133.8 Detected   | 5830428M24Rik | 14.86666667 | 1.38888889 | 7.07936508 | 0.6613757 |
| A_55_P2097 | 5.6 Not Detect  | 3.7 Not Detect   | 3.6 Not Detect   | 83.2 Detected    | Olf1287       | 14.85714286 | 0.64285714 | 22.4864865 | 0.972973  |
| A_55_P2109 | 24.9 Detected   | 71.8 Detected    | 109.6 Detected   | 369.9 Detected   | Ache          | 14.85542169 | 4.40160643 | 5.15181058 | 1.5264624 |
| A_52_P3224 | 1712.8 Detected | 17480.6 Detected | 21423.7 Detected | 25279.6 Detected | Mpzi2         | 14.75922466 | 12.5079986 | 1.44615173 | 1.2255701 |
| A_51_P4835 | 125.6 Detected  | 89.6 Detected    | 1397.9 Detected  | 1849.7 Detected  | Aass          | 14.72691083 | 11.1297771 | 20.6439732 | 15.601563 |
| A_51_P5140 | 30.1 Detected   | 3.9 Not Detect   | 591.1 Detected   | 442.9 Detected   | Cma1          | 14.71428571 | 19.6378738 | 113.564103 | 151.5641  |
| A_66_P1251 | 11.5 Not Detect | 9.7 Not Detect   | 3.9 Not Detect   | 168.4 Detected   | 4931408C20Rik | 14.64347826 | 0.33913043 | 17.3608247 | 0.4020619 |
| A_55_P2131 | 13.3 Not Detect | 392 Detected     | 10.5 Not Detect  | 194.7 Detected   | Prrx1         | 14.63909774 | 0.78947368 | 0.49668367 | 0.0267857 |
| A_51_P3088 | 2.7 Not Detect  | 23.1 Detected    | 3.2 Not Detect   | 39.5 Not Detect  | Nrn1          | 14.62962963 | 1.18518519 | 1.70995671 | 0.1385281 |
| A_55_P2053 | 2.7 Not Detect  | 87.1 Detected    | 3.1 Not Detect   | 39.5 Not Detect  | Nefh          | 14.62962963 | 1.14814815 | 0.45350172 | 0.0355913 |
| A_55_P1957 | 2.9 Not Detect  | 6 Not Detect     | 113.5 Detected   | 42.3 Not Detect  | Sulf1         | 14.5862069  | 39.137931  | 7.05       | 18.916667 |
| A_52_P6888 | 3.7 Not Detect  | 3.1 Not Detect   | 5.7 Not Detect   | 53.8 Detected    | Defb14        | 14.54054054 | 1.54054054 | 17.3548387 | 1.8387097 |
| A_51_P2108 | 19 Detected     | 18.9 Detected    | 16 Not Detect    | 276.2 Detected   | Nudt18        | 14.53684211 | 0.84210526 | 14.6137566 | 0.8465608 |
| A_55_P2109 | 43.3 Detected   | 576.8 Detected   | 123.6 Detected   | 628 Detected     | Rgs2          | 14.5034642  | 2.85450346 | 1.0887656  | 0.2142857 |
| A_51_P3300 | 12.1 Not Detect | 29.2 Detected    | 9.2 Not Detect   | 175.2 Detected   | Cyp2j9        | 14.47933884 | 0.76033058 | 6          | 0.3150685 |
| A_55_P2373 | 16.2 Detected   | 16.6 Not Detect  | 4.7 Not Detect   | 234.1 Detected   | A330072L02Rik | 14.45061728 | 0.29012346 | 14.1024096 | 0.2831325 |
| A_51_P1261 | 12.5 Not Detect | 104 Detected     | 61.7 Detected    | 180.3 Detected   | Dapk2         | 14.4        | 4.936      | 1.73365385 | 0.5932692 |
| A_51_P3067 | 88.4 Detected   | 172.2 Detected   | 414.3 Detected   | 1271.8 Detected  | Cldn15        | 14.38687783 | 4.68665158 | 7.38559814 | 2.4059233 |
| A_55_P1963 | 4.5 Not Detect  | 4.6 Not Detect   | 5.1 Not Detect   | 64.7 Detected    | Scimp         | 14.37777778 | 1.13333333 | 14.0652174 | 1.1086957 |
| A_55_P2070 | 13.7 Detected   | 22.2 Detected    | 8 Not Detect     | 196.8 Detected   | Gas1          | 14.3649635  | 0.58394161 | 8.86486486 | 0.3603604 |
| A_52_P4672 | 21 Detected     | 164.3 Detected   | 150 Detected     | 300.6 Detected   | Il1rap        | 14.31428571 | 7.14285714 | 1.82958004 | 0.9129641 |
| A_52_P1215 | 586.8 Detected  | 1231.4 Detected  | 8739.8 Detected  | 8377.7 Detected  | Pllp          | 14.2769257  | 14.8940014 | 6.80339451 | 7.0974501 |



|            |                  |                   |                  |                   |               |             |            |            |           |
|------------|------------------|-------------------|------------------|-------------------|---------------|-------------|------------|------------|-----------|
| A_55_P2099 | 14.5 Not Detect  | 66.2 Detected     | 63.5 Detected    | 207 Detected      | Lrrc51        | 14.27586207 | 4.37931034 | 3.12688822 | 0.9592145 |
| A_55_P2013 | 89 Detected      | 153.4 Detected    | 890.8 Detected   | 1269.1 Detected   | Gal3st1       | 14.25955056 | 10.0089888 | 8.27314211 | 5.8070404 |
| A_51_P2438 | 5.2 Not Detect   | 7.2 Not Detect    | 7.8 Not Detect   | 74 Detected       | Traf3ip3      | 14.23076923 | 1.5        | 10.2777778 | 1.0833333 |
| A_51_P1396 | 15361.5 Detected | 174068.5 Detected | 41619.7 Detected | 218418.9 Detected | Sprr1a        | 14.21859193 | 2.7093513  | 1.25478705 | 0.2390995 |
| A_55_P2126 | 24.5 Detected    | 22.6 Detected     | 21 Detected      | 347.8 Detected    | 1600014K23Rik | 14.19591837 | 0.85714286 | 15.3893805 | 0.9292035 |
| A_51_P2869 | 124.9 Detected   | 1353.3 Detected   | 112.9 Detected   | 1772.7 Detected   | Lhpp          | 14.19295436 | 0.90392314 | 1.30990911 | 0.0834257 |
| A_51_P2792 | 25.4 Detected    | 190.7 Detected    | 302 Detected     | 360.1 Detected    | Dennd2d       | 14.17716535 | 11.8897638 | 1.88830624 | 1.5836392 |
| A_55_P2282 | 36.7 Detected    | 72.4 Detected     | 232.5 Detected   | 519.8 Detected    | 2210011K15Rik | 14.16348774 | 6.33514986 | 7.17955801 | 3.211326  |
| A_55_P2295 | 15.4 Detected    | 4.7 Not Detect    | 25.6 Detected    | 217.2 Detected    | 9430083A17Rik | 14.1038961  | 1.66233766 | 46.212766  | 5.4468085 |
| A_55_P2099 | 3.8 Not Detect   | 3.5 Not Detect    | 5.5 Not Detect   | 53.4 Detected     | 1700021F02Rik | 14.05263158 | 1.44736842 | 15.2571429 | 1.5714286 |
| A_55_P2045 | 6 Not Detect     | 22.3 Detected     | 79.7 Detected    | 84.3 Detected     | Fam83b        | 14.05       | 13.2833333 | 3.78026906 | 3.573991  |
| A_55_P2053 | 14.9 Detected    | 40.1 Detected     | 26.1 Detected    | 208.8 Detected    | Zfr2          | 14.01342282 | 1.75167785 | 5.20698254 | 0.6508728 |
| A_51_P3080 | 184.9 Detected   | 404.3 Detected    | 998.6 Detected   | 2580.7 Detected   | Cmtm8         | 13.9572742  | 5.40075717 | 6.38313134 | 2.4699481 |
| A_51_P2592 | 2070.8 Detected  | 3331.7 Detected   | 13861.5 Detected | 28787.5 Detected  | Lpl           | 13.90163222 | 6.69378984 | 8.64048384 | 4.1604886 |
| A_55_P2227 | 3 Not Detect     | 3.7 Not Detect    | 102.5 Detected   | 41.7 Not Detect   | 5330411J11Rik | 13.9        | 34.1666667 | 11.2702703 | 27.702703 |
| A_55_P2174 | 12.7 Not Detect  | 6.7 Not Detect    | 5.5 Not Detect   | 176 Detected      | Pgpep1l       | 13.85826772 | 0.43307087 | 26.2686567 | 0.8208955 |
| A_51_P1092 | 153.1 Detected   | 357.6 Detected    | 2420.9 Detected  | 2119.6 Detected   | Cys1          | 13.84454605 | 15.8125408 | 5.92729306 | 6.7698546 |
| A_51_P3449 | 4.8 Not Detect   | 3.2 Not Detect    | 3.1 Not Detect   | 66.4 Detected     | 6820408C15Rik | 13.83333333 | 0.64583333 | 20.75      | 0.96875   |
| A_66_P1090 | 12.7 Not Detect  | 5.3 Not Detect    | 9.2 Not Detect   | 175.5 Detected    | 4930534H18Rik | 13.81889764 | 0.72440945 | 33.1132075 | 1.7358491 |
| A_51_P1226 | 64.5 Detected    | 68 Detected       | 1043 Detected    | 890.4 Detected    | Liph          | 13.80465116 | 16.1705426 | 13.0941176 | 15.338235 |
| A_52_P4380 | 11.1 Not Detect  | 133.2 Detected    | 20.5 Detected    | 153.2 Detected    | Lpar4         | 13.8018018  | 1.84684685 | 1.15015015 | 0.1539039 |
| A_55_P2175 | 250.7 Detected   | 1057.9 Detected   | 1405.1 Detected  | 3451.9 Detected   | Ano9          | 13.76904667 | 5.60470682 | 3.26297382 | 1.3281974 |
| A_55_P2102 | 5.8 Not Detect   | 17 Not Detect     | 4.4 Not Detect   | 79.8 Detected     | B3gntl1       | 13.75862069 | 0.75862069 | 4.69411765 | 0.2588235 |
| A_51_P3862 | 10.3 Not Detect  | 31.9 Detected     | 194.3 Detected   | 141.6 Detected    | Cyp2d12       | 13.74757282 | 18.8640777 | 4.43887147 | 6.0909091 |
| A_51_P1375 | 12.5 Not Detect  | 202 Detected      | 38.1 Detected    | 171.7 Detected    | Etv2          | 13.736      | 3.048      | 0.85       | 0.1886139 |
| A_55_P1999 | 108.8 Detected   | 417.4 Detected    | 405.1 Detected   | 1491.7 Detected   | Lrrc51        | 13.71047794 | 3.72334559 | 3.57379013 | 0.9705319 |
| A_52_P6637 | 6.3 Not Detect   | 26 Detected       | 11.7 Not Detect  | 86 Detected       | Tnik          | 13.65079365 | 1.85714286 | 3.30769231 | 0.45      |
| A_52_P4749 | 17.6 Detected    | 15.2 Not Detect   | 39.4 Detected    | 239.9 Detected    | Col20a1       | 13.63068182 | 2.23863636 | 15.7828947 | 2.5921053 |
| A_52_P5224 | 9.1 Not Detect   | 77.2 Detected     | 97.4 Detected    | 124 Detected      | Hsh2d         | 13.62637363 | 10.7032967 | 1.60621762 | 1.261658  |
| A_55_P2041 | 19.4 Detected    | 38 Detected       | 36.9 Detected    | 264.3 Detected    | Gm10354       | 13.62371134 | 1.90206186 | 6.95526316 | 0.9710526 |
| A_55_P1993 | 36.8 Detected    | 33.3 Detected     | 65.5 Detected    | 497.9 Detected    | Gm5168        | 13.5298913  | 1.7798913  | 14.951952  | 1.966967  |
| A_51_P2200 | 28.8 Detected    | 92.5 Detected     | 106 Detected     | 389.6 Detected    | Mmp15         | 13.52777778 | 3.68055556 | 4.21189189 | 1.1459459 |
| A_66_P1150 | 19.1 Detected    | 20.3 Detected     | 27.9 Detected    | 257.3 Detected    | Nfia          | 13.47120419 | 1.46073298 | 12.6748768 | 1.3743842 |
| A_52_P4104 | 30.6 Detected    | 44.7 Detected     | 1314.7 Detected  | 412 Detected      | 2310057J18Rik | 13.46405229 | 42.9640523 | 9.21700224 | 29.411633 |
| A_55_P2179 | 11.7 Not Detect  | 16.1 Not Detect   | 22.3 Detected    | 157.3 Detected    | Ciita         | 13.44444444 | 1.90598291 | 9.77018634 | 1.3850932 |
| A_55_P2055 | 140.8 Detected   | 877.6 Detected    | 137.9 Detected   | 1891 Detected     | Spint1        | 13.43039773 | 0.97940341 | 2.1547402  | 0.1571331 |
| A_55_P2099 | 304.6 Detected   | 283.9 Detected    | 24.8 Detected    | 4071.7 Detected   | Slc24a3       | 13.36736704 | 0.08141825 | 14.3420218 | 0.0873547 |
| A_52_P5702 | 167.9 Detected   | 749.7 Detected    | 201.8 Detected   | 2244 Detected     | Kbtbd11       | 13.36509827 | 1.2019059  | 2.99319728 | 0.2691743 |
| A_55_P2400 | 10.5 Not Detect  | 21.4 Detected     | 10.6 Not Detect  | 139.9 Detected    | 4933430A20Rik | 13.32380952 | 1.00952381 | 6.53738318 | 0.4953271 |
| A_52_P2578 | 700.7 Detected   | 1114.2 Detected   | 4907.4 Detected  | 9332.3 Detected   | Lpl           | 13.3185386  | 7.00356786 | 8.37578532 | 4.4044157 |

|            |                 |                  |                 |                  |               |             |            |            |           |
|------------|-----------------|------------------|-----------------|------------------|---------------|-------------|------------|------------|-----------|
| A_55_P1958 | 5.4 Not Detect  | 8.2 Not Detect   | 6.6 Not Detect  | 71.5 Detected    | A530032D15Rik | 13.24074074 | 1.22222222 | 8.7195122  | 0.804878  |
| A_55_P2125 | 99.5 Detected   | 473.7 Detected   | 1190.9 Detected | 1316.5 Detected  | Esam          | 13.23115578 | 11.9688442 | 2.77918514 | 2.5140384 |
| A_51_P2006 | 235.4 Detected  | 405.7 Detected   | 940.7 Detected  | 3112.5 Detected  | Clmn          | 13.22217502 | 3.99617672 | 7.67192507 | 2.3187084 |
| A_51_P3411 | 410.9 Detected  | 2374.1 Detected  | 341.8 Detected  | 5386.9 Detected  | Spint1        | 13.11000243 | 0.83183256 | 2.26902826 | 0.1439703 |
| A_55_P2119 | 17.5 Detected   | 3.9 Not Detect   | 3.5 Not Detect  | 228.4 Detected   | Srrm3         | 13.05142857 | 0.2        | 58.5641026 | 0.8974359 |
| A_52_P3436 | 42.2 Detected   | 466.1 Detected   | 230.3 Detected  | 548.7 Detected   | Rbp7          | 13.00236967 | 5.45734597 | 1.17721519 | 0.4941    |
| A_52_P5891 | 619.4 Detected  | 917.9 Detected   | 3233.6 Detected | 8022.7 Detected  | Fam101b       | 12.95237326 | 5.220536   | 8.74027672 | 3.5228238 |
| A_55_P1970 | 35.7 Detected   | 84.6 Detected    | 32.5 Detected   | 461.8 Detected   | AA792892      | 12.93557423 | 0.91036415 | 5.45862884 | 0.3841608 |
| A_51_P1991 | 11.5 Not Detect | 41.3 Detected    | 45 Detected     | 148.4 Detected   | Cidea         | 12.90434783 | 3.91304348 | 3.59322034 | 1.0895884 |
| A_51_P3179 | 3002.8 Detected | 22465.5 Detected | 33386 Detected  | 38655.7 Detected | Perp          | 12.87321833 | 11.1182896 | 1.72066947 | 1.4861009 |
| A_51_P4713 | 10.7 Not Detect | 17.1 Detected    | 41.2 Detected   | 137.1 Detected   | Ccdc64b       | 12.81308411 | 3.85046729 | 8.01754386 | 2.4093567 |
| A_51_P1830 | 11.9 Not Detect | 224.2 Detected   | 927.9 Detected  | 152.3 Detected   | Upb1          | 12.79831933 | 77.9747899 | 0.67930419 | 4.1387154 |
| A_51_P2199 | 1124.5 Detected | 6871.7 Detected  | 5753.6 Detected | 14366.1 Detected | Tmem125       | 12.77554469 | 5.11658515 | 2.09061804 | 0.8372892 |
| A_55_P2369 | 23.6 Detected   | 39.6 Detected    | 72.4 Detected   | 300.8 Detected   | 9530018H14Rik | 12.74576271 | 3.06779661 | 7.5959596  | 1.8282828 |
| A_55_P2102 | 6.3 Not Detect  | 3.5 Not Detect   | 221.5 Detected  | 80 Detected      | Elfn1         | 12.6984127  | 35.1587302 | 22.8571429 | 63.285714 |
| A_55_P2072 | 20.1 Detected   | 324.1 Detected   | 22.6 Detected   | 254.7 Detected   | Cnksr2        | 12.67164179 | 1.12437811 | 0.78586856 | 0.0697316 |
| A_55_P1995 | 16.4 Detected   | 19 Detected      | 28.2 Detected   | 207 Detected     | Zfp605        | 12.62195122 | 1.7195122  | 10.8947368 | 1.4842105 |
| A_55_P2118 | 23.9 Detected   | 175.8 Detected   | 88 Detected     | 301.2 Detected   | Otop2         | 12.60251046 | 3.68200837 | 1.71331058 | 0.5005688 |
| A_51_P4793 | 8.8 Not Detect  | 51.1 Detected    | 171.9 Detected  | 110.6 Detected   | Acss1         | 12.56818182 | 19.5340909 | 2.16438356 | 3.3639922 |
| A_51_P3310 | 799.3 Detected  | 424.4 Detected   | 6353.6 Detected | 10022.7 Detected | Sema4g        | 12.53934693 | 7.94895534 | 23.616164  | 14.970782 |
| A_51_P4571 | 30.9 Detected   | 72 Detected      | 601.6 Detected  | 387.1 Detected   | Sfrp4         | 12.52750809 | 19.4692557 | 5.37638889 | 8.3555556 |
| A_55_P2095 | 9.4 Not Detect  | 81.8 Detected    | 187.8 Detected  | 117.6 Detected   | Abca4         | 12.5106383  | 19.9787234 | 1.43765281 | 2.2958435 |
| A_55_P2035 | 21.8 Detected   | 1535 Detected    | 3.3 Not Detect  | 271.7 Detected   | Hpgd          | 12.46330275 | 0.15137615 | 0.17700326 | 0.0021498 |
| A_51_P4338 | 96.9 Detected   | 933.4 Detected   | 326.3 Detected  | 1203.9 Detected  | Vegfc         | 12.42414861 | 3.36738906 | 1.28980073 | 0.3495822 |
| A_51_P1596 | 15.4 Detected   | 500.1 Detected   | 180.9 Detected  | 191.2 Detected   | Hebp2         | 12.41558442 | 11.7467532 | 0.38232354 | 0.3617277 |
| A_55_P2025 | 11.1 Not Detect | 13 Not Detect    | 311.1 Detected  | 137.8 Detected   | Muc4          | 12.41441441 | 28.027027  | 10.6       | 23.930769 |
| A_55_P2009 | 51.3 Detected   | 194.5 Detected   | 1420.2 Detected | 636.1 Detected   | Ppp1r14d      | 12.39961014 | 27.6842105 | 3.27043702 | 7.3017995 |
| A_55_P1968 | 83.4 Detected   | 343.4 Detected   | 699.6 Detected  | 1024.4 Detected  | Prph          | 12.28297362 | 8.38848921 | 2.98311008 | 2.0372743 |
| A_51_P2091 | 3.2 Not Detect  | 3.8 Not Detect   | 52 Detected     | 39.2 Not Detect  | Agr2          | 12.25       | 16.25      | 10.3157895 | 13.684211 |
| A_55_P2082 | 7.8 Not Detect  | 3.2 Not Detect   | 78.4 Detected   | 95.5 Detected    | Cybb          | 12.24358974 | 10.0512821 | 29.84375   | 24.5      |
| A_55_P2055 | 262.3 Detected  | 354.7 Detected   | 596.4 Detected  | 3201.5 Detected  | Cd209d        | 12.2054899  | 2.27373237 | 9.02593741 | 1.6814209 |
| A_51_P3494 | 4.1 Not Detect  | 8.8 Not Detect   | 3.1 Not Detect  | 50 Detected      | Zfp300        | 12.19512195 | 0.75609756 | 5.68181818 | 0.3522727 |
| A_55_P2183 | 28 Detected     | 479.4 Detected   | 23.8 Detected   | 340.8 Detected   | Marveld3      | 12.17142857 | 0.85       | 0.71088861 | 0.0496454 |
| A_55_P1967 | 45.9 Detected   | 53.5 Detected    | 44.5 Detected   | 558.4 Compromis  | Gm4633        | 12.16557734 | 0.96949891 | 10.4373832 | 0.8317757 |
| A_55_P2218 | 5.5 Not Detect  | 24.7 Detected    | 70 Detected     | 66.9 Detected    | 9430011C21Rik | 12.16363636 | 12.7272727 | 2.70850202 | 2.8340081 |
| A_52_P6285 | 40.2 Detected   | 549.5 Detected   | 494.9 Detected  | 487.9 Detected   | Ggt7          | 12.13681592 | 12.3109453 | 0.88789809 | 0.9006369 |
| A_55_P1980 | 12.1 Not Detect | 17.9 Not Detect  | 7.2 Not Detect  | 146.4 Detected   | Gm4316        | 12.09917355 | 0.59504132 | 8.17877095 | 0.4022346 |
| A_55_P2083 | 14 Not Detect   | 49.6 Detected    | 41.1 Detected   | 168.8 Detected   | Robo2         | 12.05714286 | 2.93571429 | 3.40322581 | 0.828629  |
| A_55_P2060 | 36.5 Detected   | 43.7 Detected    | 141.2 Detected  | 439.3 Detected   | LOC101056219  | 12.03561644 | 3.86849315 | 10.0526316 | 3.2311213 |
| A_55_P1955 | 14.3 Not Detect | 37.5 Detected    | 13.5 Not Detect | 171.4 Detected   | Gm11237       | 11.98601399 | 0.94405594 | 4.57066667 | 0.36      |

|            |                 |                 |                  |                  |               |             |            |            |           |
|------------|-----------------|-----------------|------------------|------------------|---------------|-------------|------------|------------|-----------|
| A_51_P3426 | 16.4 Detected   | 44.2 Detected   | 338.7 Detected   | 196.4 Detected   | 2200002J24Rik | 11.97560976 | 20.652439  | 4.44343891 | 7.6628959 |
| A_55_P2002 | 3.9 Not Detect  | 2.9 Not Detect  | 6.7 Not Detect   | 46.6 Detected    | Ctsj          | 11.94871795 | 1.71794872 | 16.0689655 | 2.3103448 |
| A_55_P1974 | 8.2 Not Detect  | 5.9 Not Detect  | 7.8 Not Detect   | 97.7 Detected    | Duox2         | 11.91463415 | 0.95121951 | 16.559322  | 1.3220339 |
| A_55_P2107 | 5.3 Not Detect  | 3.6 Not Detect  | 3.6 Not Detect   | 63.1 Detected    | Ubl4b         | 11.90566038 | 0.67924528 | 17.5277778 | 1         |
| A_55_P2047 | 77.5 Detected   | 242.3 Detected  | 927.9 Detected   | 919.5 Detected   | Cutal         | 11.86451613 | 11.9729032 | 3.79488238 | 3.8295501 |
| A_55_P2158 | 2.9 Not Detect  | 20.5 Detected   | 31.3 Detected    | 34.3 Not Detect  | 1700028K03Rik | 11.82758621 | 10.7931034 | 1.67317073 | 1.5268293 |
| A_55_P2076 | 66.2 Detected   | 71.5 Detected   | 59.5 Detected    | 781.2 Compromis  | Prss51        | 11.80060423 | 0.89879154 | 10.9258741 | 0.8321678 |
| A_51_P2669 | 22 Detected     | 23.8 Detected   | 257.8 Detected   | 259.2 Detected   | Nr1i2         | 11.78181818 | 11.7181818 | 10.8907563 | 10.831933 |
| A_55_P2110 | 3135.6 Detected | 8857.5 Detected | 3674.7 Detected  | 36772.8 Detected | Ddc           | 11.72751626 | 1.17192882 | 4.15160034 | 0.4148688 |
| A_55_P2006 | 394.2 Detected  | 5635.6 Detected | 2396.2 Detected  | 4621.4 Detected  | Krt13         | 11.72349061 | 6.07864028 | 0.82003691 | 0.4251899 |
| A_52_P4741 | 40.9 Detected   | 137.4 Detected  | 167.2 Detected   | 477.5 Detected   | Onecut3       | 11.67481663 | 4.08801956 | 3.47525473 | 1.216885  |
| A_55_P2131 | 4.7 Not Detect  | 3 Not Detect    | 6.6 Not Detect   | 54.6 Detected    | Otogl         | 11.61702128 | 1.40425532 | 18.2       | 2.2       |
| A_51_P2458 | 29.1 Detected   | 38.2 Detected   | 10.6 Not Detect  | 337.8 Detected   | Mapk4         | 11.60824742 | 0.36426117 | 8.84293194 | 0.2774869 |
| A_55_P2121 | 5.8 Not Detect  | 11.2 Not Detect | 10.9 Not Detect  | 67.3 Detected    | 4930413G21Rik | 11.60344828 | 1.87931034 | 6.00892857 | 0.9732143 |
| A_55_P1979 | 16.2 Detected   | 26.7 Detected   | 164.1 Detected   | 187.8 Detected   | Abcc8         | 11.59259259 | 10.1296296 | 7.03370787 | 6.1460674 |
| A_55_P2179 | 44 Detected     | 28.3 Detected   | 99.5 Detected    | 509.7 Detected   | Celsr3        | 11.58409091 | 2.26136364 | 18.0106007 | 3.5159011 |
| A_55_P2067 | 19.6 Detected   | 33.2 Detected   | 18.7 Detected    | 226.9 Detected   | Gm14015       | 11.57653061 | 0.95408163 | 6.83433735 | 0.563253  |
| A_55_P2196 | 2.7 Not Detect  | 4.5 Not Detect  | 17.7 Detected    | 31.2 Not Detect  | 4930412C18Rik | 11.55555556 | 6.55555556 | 6.93333333 | 3.9333333 |
| A_55_P2163 | 3.5 Not Detect  | 34 Detected     | 36.6 Detected    | 39.9 Not Detect  | Cxx1c         | 11.4        | 10.4571429 | 1.17352941 | 1.0764706 |
| A_55_P2157 | 2850.4 Detected | 8564.2 Detected | 15420.4 Detected | 32446.2 Detected | Cdhr2         | 11.38303396 | 5.40990738 | 3.78858504 | 1.8005651 |
| A_51_P2854 | 43 Detected     | 34.5 Detected   | 37.2 Detected    | 488.9 Detected   | Rbbp6         | 11.36976744 | 0.86511628 | 14.1710145 | 1.0782609 |
| A_55_P2019 | 3 Not Detect    | 21.7 Detected   | 7 Not Detect     | 34.1 Not Detect  | Csprs         | 11.36666667 | 2.33333333 | 1.57142857 | 0.3225806 |
| A_55_P2072 | 1679.2 Detected | 1407.8 Detected | 73570.3 Detected | 19030 Detected   | Dpcr1         | 11.33277751 | 43.8127084 | 13.5175451 | 52.259057 |
| A_55_P2157 | 28.1 Detected   | 40.8 Detected   | 29.4 Detected    | 318.4 Detected   | Gm10755       | 11.33096085 | 1.04626335 | 7.80392157 | 0.7205882 |
| A_51_P3778 | 1310.1 Detected | 1815.5 Detected | 5955.8 Detected  | 14838.1 Detected | Gstt3         | 11.32592932 | 4.54606519 | 8.17301019 | 3.2805288 |
| A_55_P1978 | 86.3 Detected   | 388.7 Detected  | 444.7 Detected   | 973.2 Detected   | Gm10439       | 11.2769409  | 5.15295481 | 2.50373038 | 1.14407   |
| A_55_P1999 | 97.9 Detected   | 407 Detected    | 1623.7 Detected  | 1101.4 Detected  | Pik3c2g       | 11.25025536 | 16.5852911 | 2.70614251 | 3.9894349 |
| A_51_P2018 | 17.3 Detected   | 23.1 Detected   | 153.4 Detected   | 194.3 Detected   | Dsp           | 11.23121387 | 8.86705202 | 8.41125541 | 6.6406926 |
| A_51_P4680 | 9 Not Detect    | 18.2 Detected   | 57.4 Detected    | 100.6 Detected   | Ggt1          | 11.17777778 | 6.37777778 | 5.52747253 | 3.1538462 |
| A_55_P2017 | 7.6 Not Detect  | 3.9 Not Detect  | 3.3 Not Detect   | 84.5 Detected    | Gm10471       | 11.11842105 | 0.43421053 | 21.6666667 | 0.8461538 |
| A_52_P3507 | 40.9 Detected   | 100.3 Detected  | 93.6 Detected    | 454.7 Detected   | Phlda2        | 11.11735941 | 2.28850856 | 4.5333998  | 0.9332004 |
| A_55_P2034 | 93.9 Detected   | 86.3 Detected   | 64.7 Detected    | 1041.7 Detected  | Zfp69         | 11.09371672 | 0.68903088 | 12.0706837 | 0.7497103 |
| A_55_P2134 | 50.3 Detected   | 92.2 Detected   | 67.8 Detected    | 557.6 Compromis  | Phkb          | 11.08548708 | 1.34791252 | 6.04772234 | 0.7353579 |
| A_55_P2122 | 19.3 Detected   | 329 Detected    | 18.7 Detected    | 212.6 Detected   | Cbr2          | 11.01554404 | 0.96891192 | 0.64620061 | 0.0568389 |
| A_55_P1958 | 12.4 Not Detect | 77.9 Detected   | 14 Not Detect    | 136.5 Detected   | Tgm5          | 11.00806452 | 1.12903226 | 1.75224647 | 0.1797176 |
| A_52_P1960 | 2.8 Not Detect  | 29.3 Detected   | 3.3 Not Detect   | 30.8 Not Detect  | Btn1a1        | 11          | 1.17857143 | 1.05119454 | 0.112628  |
| A_55_P2207 | 8 Not Detect    | 10.8 Not Detect | 3.3 Not Detect   | 88 Detected      | 6430710M23Rik | 11          | 0.4125     | 8.14814815 | 0.3055556 |
| A_55_P2026 | 4.6 Not Detect  | 21 Detected     | 432.1 Detected   | 50.5 Not Detect  | Cfi           | 10.97826087 | 93.9347826 | 2.4047619  | 20.57619  |
| A_51_P2120 | 14 Not Detect   | 86.1 Detected   | 29.3 Detected    | 153.2 Detected   | Aoc1          | 10.94285714 | 2.09285714 | 1.77932636 | 0.340302  |
| A_55_P2050 | 11.3 Not Detect | 9.7 Not Detect  | 9.5 Not Detect   | 123.5 Detected   | Elf4          | 10.92920354 | 0.84070796 | 12.7319588 | 0.9793814 |

|            |                  |                 |                  |                   |               |             |            |            |           |
|------------|------------------|-----------------|------------------|-------------------|---------------|-------------|------------|------------|-----------|
| A_55_P1983 | 6.9 Not Detect   | 10.1 Not Detect | 6.8 Not Detect   | 75.3 Detected     | Vmn1r45       | 10.91304348 | 0.98550725 | 7.45544554 | 0.6732673 |
| A_51_P3807 | 23 Detected      | 27.7 Detected   | 92.4 Detected    | 250.5 Detected    | Cbfa2t3       | 10.89130435 | 4.0173913  | 9.0433213  | 3.3357401 |
| A_52_P2605 | 3231.4 Detected  | 2587.8 Detected | 35883 Detected   | 35190.4 Detected  | Vil1          | 10.8901405  | 11.1044748 | 13.5985779 | 13.866218 |
| A_55_P2052 | 2.6 Not Detect   | 3 Not Detect    | 20.7 Detected    | 28.3 Not Detect   | Dyrk4         | 10.88461538 | 7.96153846 | 9.43333333 | 6.9       |
| A_51_P4056 | 10210.5 Detected | 7480.8 Detected | 72211.7 Detected | 111033.2 Detected | Ndrgr1        | 10.87441359 | 7.07229812 | 14.8424233 | 9.6529382 |
| A_55_P1985 | 164.8 Detected   | 373.3 Detected  | 946.2 Detected   | 1790.7 Detected   | B4galt4       | 10.86589806 | 5.74150485 | 4.79694616 | 2.5346906 |
| A_51_P3033 | 16.3 Detected    | 21.9 Detected   | 44.1 Detected    | 176.9 Detected    | Hoxa13        | 10.85276074 | 2.70552147 | 8.07762557 | 2.0136986 |
| A_51_P3763 | 384.9 Detected   | 1549.1 Detected | 390.8 Detected   | 4169.3 Detected   | Hebp1         | 10.8321642  | 1.01532866 | 2.69143374 | 0.2522755 |
| A_51_P4662 | 23.6 Detected    | 137.6 Detected  | 84.3 Detected    | 255.6 Detected    | Pdgrf1        | 10.83050847 | 3.5720339  | 1.85755814 | 0.6126453 |
| A_55_P2121 | 443.5 Detected   | 774.4 Detected  | 695.6 Detected   | 4802.6 Detected   | Tox4          | 10.82886133 | 1.56843292 | 6.20170455 | 0.8982438 |
| A_51_P4764 | 40.9 Detected    | 81 Detected     | 19.1 Detected    | 441.1 Detected    | Cyp2j13       | 10.78484108 | 0.46699267 | 5.44567901 | 0.2358025 |
| A_51_P3372 | 236.5 Detected   | 486.6 Detected  | 952.3 Detected   | 2547.7 Detected   | Aldob         | 10.77251586 | 4.02663848 | 5.23571722 | 1.9570489 |
| A_51_P3566 | 14.2 Detected    | 62.1 Detected   | 253.4 Detected   | 152.6 Detected    | Rab39b        | 10.74647887 | 17.8450704 | 2.45732689 | 4.0805153 |
| A_55_P2031 | 25 Detected      | 21 Detected     | 26.2 Detected    | 268.4 Detected    | Lhx3          | 10.736      | 1.048      | 12.7809524 | 1.247619  |
| A_66_P1089 | 5.5 Not Detect   | 3.8 Not Detect  | 3.9 Not Detect   | 59 Detected       | Olf1129       | 10.72727273 | 0.70909091 | 15.5263158 | 1.0263158 |
| A_52_P6504 | 1052.6 Detected  | 585.9 Detected  | 3509 Detected    | 11282.6 Detected  | Spink4        | 10.71879156 | 3.33365001 | 19.2568698 | 5.9890766 |
| A_55_P2023 | 5.2 Not Detect   | 14.8 Not Detect | 3.4 Not Detect   | 55.7 Detected     | LOC101055977  | 10.71153846 | 0.65384615 | 3.76351351 | 0.2297297 |
| A_55_P1968 | 18.6 Detected    | 16.6 Not Detect | 13.4 Not Detect  | 198.6 Detected    | Olf1505       | 10.67741935 | 0.72043011 | 11.9638554 | 0.8072289 |
| A_66_P1226 | 9.1 Not Detect   | 5.9 Not Detect  | 4.9 Not Detect   | 96.6 Detected     | Cux2          | 10.61538462 | 0.53846154 | 16.3728814 | 0.8305085 |
| A_52_P3255 | 6.2 Not Detect   | 11.1 Not Detect | 9 Not Detect     | 65.8 Detected     | 6530411M01Rik | 10.61290323 | 1.4516129  | 5.92792793 | 0.8108108 |
| A_51_P3275 | 50.8 Detected    | 201.6 Detected  | 695.8 Detected   | 539.1 Detected    | Gstm4         | 10.61220472 | 13.6968504 | 2.67410714 | 3.4513889 |
| A_51_P2844 | 49.5 Detected    | 58.8 Detected   | 546.6 Detected   | 524.5 Detected    | Cstad         | 10.5959596  | 11.0424242 | 8.92006803 | 9.2959184 |
| A_55_P2009 | 10 Not Detect    | 28.5 Detected   | 159.2 Detected   | 104.9 Detected    | Gm10487       | 10.49       | 15.92      | 3.68070175 | 5.5859649 |
| A_51_P2756 | 266 Detected     | 340.7 Detected  | 1250.5 Detected  | 2783.3 Detected   | Fam101b       | 10.46353383 | 4.70112782 | 8.16935721 | 3.6703845 |
| A_55_P2181 | 8 Not Detect     | 86.7 Detected   | 17.3 Not Detect  | 83.4 Detected     | Sult1d1       | 10.425      | 2.1625     | 0.96193772 | 0.1995386 |
| A_51_P4086 | 41.3 Detected    | 11.2 Not Detect | 23.7 Detected    | 429.9 Detected    | Shisa2        | 10.40920097 | 0.57384988 | 38.3839286 | 2.1160714 |
| A_55_P2275 | 11.7 Not Detect  | 3.2 Not Detect  | 3.2 Not Detect   | 121.7 Detected    | C78197        | 10.4017094  | 0.27350427 | 38.03125   | 1         |
| A_51_P4238 | 7.6 Not Detect   | 98.6 Detected   | 75.2 Detected    | 79 Detected       | Alpi          | 10.39473684 | 9.89473684 | 0.80121704 | 0.7626775 |
| A_52_P2828 | 53.4 Detected    | 96.4 Detected   | 707.8 Detected   | 551.8 Detected    | Spin2c        | 10.33333333 | 13.2546816 | 5.72406639 | 7.3423237 |
| A_55_P2080 | 1140 Detected    | 5116.3 Detected | 13505.2 Detected | 11740.2 Detected  | Papss2        | 10.29842105 | 11.8466667 | 2.29466607 | 2.6396419 |
| A_55_P1963 | 5.5 Not Detect   | 9.2 Not Detect  | 3.5 Not Detect   | 56.5 Detected     | Hes3          | 10.27272727 | 0.63636364 | 6.14130435 | 0.3804348 |
| A_55_P2023 | 3.1 Not Detect   | 10.5 Not Detect | 21.6 Detected    | 31.8 Not Detect   | 1110032A03Rik | 10.25806452 | 6.96774194 | 3.02857143 | 2.0571429 |
| A_51_P2383 | 514.4 Detected   | 977.1 Detected  | 2587 Detected    | 5254.5 Detected   | B4galt4       | 10.21481337 | 5.02916019 | 5.37764814 | 2.6476307 |
| A_55_P2182 | 170.7 Detected   | 467.7 Detected  | 2197 Detected    | 1742.2 Detected   | Arl14         | 10.20620972 | 12.8705331 | 3.72503742 | 4.6974556 |
| A_55_P2176 | 5.9 Not Detect   | 8.1 Not Detect  | 4.6 Not Detect   | 60.2 Detected     | Prss50        | 10.20338983 | 0.77966102 | 7.43209877 | 0.5679012 |
| A_55_P2056 | 190.8 Detected   | 190.3 Detected  | 489 Detected     | 1946.4 Detected   | Gm9992        | 10.20125786 | 2.56289308 | 10.228061  | 2.5696269 |
| A_55_P2096 | 156.1 Detected   | 186.3 Detected  | 610.5 Detected   | 1587.8 Detected   | Acot11        | 10.17168482 | 3.91095452 | 8.52281267 | 3.2769726 |
| A_51_P1378 | 5.4 Not Detect   | 12.9 Not Detect | 11.7 Not Detect  | 54.8 Detected     | Pap1          | 10.14814815 | 2.16666667 | 4.24806202 | 0.9069767 |
| A_55_P1958 | 65.9 Detected    | 500.6 Detected  | 235.2 Detected   | 668 Detected      | Ankrd29       | 10.13657056 | 3.56904401 | 1.33439872 | 0.4698362 |
| A_55_P2094 | 34.8 Detected    | 46 Detected     | 37.5 Detected    | 352.6 Detected    | Slco1c1       | 10.13218391 | 1.07758621 | 7.66521739 | 0.8152174 |

|            |                 |                  |                  |                  |               |             |            |            |           |
|------------|-----------------|------------------|------------------|------------------|---------------|-------------|------------|------------|-----------|
| A_66_P1218 | 6.6 Not Detect  | 3.8 Not Detect   | 4 Not Detect     | 66.8 Detected    | 1700001K23Rik | 10.12121212 | 0.60606061 | 17.5789474 | 1.0526316 |
| A_52_P4355 | 18.5 Detected   | 11.7 Not Detect  | 96.9 Detected    | 187.2 Detected   | Prr15l        | 10.11891892 | 5.23783784 | 16         | 8.2820513 |
| A_51_P1822 | 43.3 Detected   | 122 Detected     | 352.2 Detected   | 436.2 Detected   | Tex40         | 10.073903   | 8.13394919 | 3.57540984 | 2.8868852 |
| A_55_P1993 | 40.2 Detected   | 50.5 Detected    | 177.6 Detected   | 404.5 Detected   | Gm1993        | 10.06218905 | 4.41791045 | 8.00990099 | 3.5168317 |
| A_51_P4541 | 359.3 Detected  | 538.4 Detected   | 3051.8 Detected  | 3613 Detected    | Sh2d4a        | 10.05566379 | 8.49373782 | 6.71062407 | 5.6682764 |
| A_51_P1221 | 34.6 Detected   | 19.6 Detected    | 82 Detected      | 347.8 Detected   | Mamstr        | 10.05202312 | 2.3699422  | 17.744898  | 4.1836735 |
| A_52_P6390 | 262.3 Detected  | 804.8 Detected   | 355 Detected     | 2634 Detected    | Ddc           | 10.04193671 | 1.35341212 | 3.27286282 | 0.4411034 |
| A_55_P1969 | 23.2 Detected   | 90.9 Detected    | 209.3 Detected   | 232.7 Detected   | Cidec         | 10.03017241 | 9.02155172 | 2.559956   | 2.3025303 |
| A_55_P2141 | 944.5 Detected  | 3412.4 Detected  | 2901.5 Detected  | 9451.1 Detected  | Tenm4         | 10.00645844 | 3.07199576 | 2.76963427 | 0.8502813 |
| A_51_P4205 | 100.8 Detected  | 123.5 Detected   | 542.8 Detected   | 1007.3 Detected  | Clic5         | 9.993055556 | 5.38492063 | 8.1562753  | 4.3951417 |
| A_55_P1964 | 32 Detected     | 94.2 Detected    | 64.2 Detected    | 319.3 Detected   | Gm3014        | 9.978125    | 2.00625    | 3.3895966  | 0.6815287 |
| A_51_P1313 | 254.7 Detected  | 1272.6 Detected  | 1873.2 Detected  | 2537.6 Detected  | Lrrc66        | 9.963093836 | 7.35453475 | 1.99402797 | 1.4719472 |
| A_51_P3191 | 23 Detected     | 38.1 Detected    | 656 Detected     | 228 Detected     | Krt4          | 9.913043478 | 28.5217391 | 5.98425197 | 17.217848 |
| A_52_P4901 | 3.3 Not Detect  | 13.9 Not Detect  | 23.3 Detected    | 32.6 Not Detect  | Shh           | 9.878787879 | 7.06060606 | 2.34532374 | 1.676259  |
| A_55_P2365 | 3.1 Not Detect  | 52.2 Detected    | 3.7 Not Detect   | 30.6 Not Detect  | B130046B21Rik | 9.870967742 | 1.19354839 | 0.5862069  | 0.0708812 |
| A_55_P2133 | 1635.1 Detected | 10299.2 Detected | 12213.7 Detected | 16110.8 Detected | Cxx1c         | 9.85309767  | 7.46969604 | 1.56427684 | 1.1858882 |
| A_55_P1972 | 26.8 Detected   | 96.9 Detected    | 85.6 Detected    | 263.1 Detected   | Fam109b       | 9.817164179 | 3.19402985 | 2.71517028 | 0.8833849 |
| A_55_P2146 | 23.9 Detected   | 152.9 Detected   | 28 Detected      | 234.2 Detected   | H2-Ab1        | 9.79916318  | 1.17154812 | 1.53172008 | 0.1831262 |
| A_55_P2141 | 1886.4 Detected | 6908.1 Detected  | 5816.8 Detected  | 18480.9 Detected | Tenm4         | 9.796914758 | 3.08354538 | 2.67525079 | 0.842026  |
| A_51_P2673 | 256.3 Detected  | 1691.4 Detected  | 1101.6 Detected  | 2506.4 Detected  | Lrfn3         | 9.779165041 | 4.29808818 | 1.48184936 | 0.6512948 |
| A_51_P2337 | 7.2 Not Detect  | 13.8 Not Detect  | 25.6 Detected    | 70.4 Detected    | Sapcd1        | 9.777777778 | 3.55555556 | 5.10144928 | 1.8550725 |
| A_51_P4737 | 71.8 Detected   | 203.3 Detected   | 70.6 Detected    | 698.1 Detected   | H2-DMa        | 9.722841226 | 0.98328691 | 3.43384161 | 0.34727   |
| A_52_P3562 | 339.7 Detected  | 1011.3 Detected  | 3231.5 Detected  | 3302.4 Detected  | Nostrin       | 9.721518987 | 9.51280542 | 3.26549985 | 3.1953921 |
| A_55_P2029 | 6.3 Not Detect  | 3.5 Not Detect   | 20.8 Detected    | 61.2 Detected    | Gm12789       | 9.714285714 | 3.3015873  | 17.4857143 | 5.9428571 |
| A_55_P1969 | 193 Detected    | 633.2 Detected   | 1686.2 Detected  | 1874.1 Detected  | Cidec         | 9.710362694 | 8.73678756 | 2.95972836 | 2.6629817 |
| A_51_P3604 | 13.7 Not Detect | 9.3 Not Detect   | 20.6 Detected    | 131.9 Detected   | Kcnk7         | 9.627737226 | 1.50364964 | 14.1827957 | 2.2150538 |
| A_52_P1485 | 5.5 Not Detect  | 5.9 Not Detect   | 3.6 Not Detect   | 52.9 Detected    | D16Ert519e    | 9.618181818 | 0.65454545 | 8.96610169 | 0.6101695 |
| A_55_P2036 | 13.1 Not Detect | 10.2 Not Detect  | 69 Detected      | 125.8 Detected   | Prr15l        | 9.603053435 | 5.26717557 | 12.3333333 | 6.7647059 |
| A_55_P2070 | 2566.7 Detected | 6766.4 Detected  | 11169.6 Detected | 24554.8 Detected | Aldoc         | 9.566680952 | 4.35173569 | 3.62893119 | 1.6507449 |
| A_55_P2124 | 81.6 Detected   | 14.6 Not Detect  | 33.8 Detected    | 780.1 Detected   | Col14a1       | 9.56004902  | 0.41421569 | 53.4315068 | 2.3150685 |
| A_52_P1055 | 27.8 Detected   | 198.4 Detected   | 51.6 Detected    | 265.5 Detected   | Nov           | 9.550359712 | 1.85611511 | 1.33820565 | 0.2600806 |
| A_55_P2012 | 31 Detected     | 23.8 Detected    | 12.4 Not Detect  | 295.6 Detected   | Ctso          | 9.535483871 | 0.4        | 12.4201681 | 0.5210084 |
| A_55_P1980 | 1749.2 Detected | 10094.8 Detected | 12672.2 Detected | 16650.3 Detected | Cxx1b         | 9.518808598 | 7.24456895 | 1.64939375 | 1.2553196 |
| A_51_P3757 | 343.6 Detected  | 1367.5 Detected  | 2333 Detected    | 3263.2 Detected  | Prap1         | 9.497089639 | 6.78987194 | 2.38625229 | 1.7060329 |
| A_55_P2119 | 265.7 Detected  | 440.6 Detected   | 821.4 Detected   | 2516.9 Detected  | Mlxipl        | 9.472713587 | 3.09145653 | 5.71243759 | 1.864276  |
| A_52_P3847 | 8.6 Not Detect  | 213.7 Detected   | 15.5 Not Detect  | 81.4 Detected    | Cdh10         | 9.465116279 | 1.80232558 | 0.38090781 | 0.0725316 |
| A_51_P2653 | 22.6 Detected   | 85.9 Detected    | 125.5 Detected   | 213.8 Detected   | Nr0b2         | 9.460176991 | 5.55309735 | 2.48894063 | 1.4610012 |
| A_51_P3655 | 3.4 Not Detect  | 7.5 Not Detect   | 672.4 Detected   | 32.1 Not Detect  | Spink3        | 9.441176471 | 197.764706 | 4.28       | 89.653333 |
| A_55_P2137 | 2.7 Not Detect  | 32.1 Detected    | 104.5 Detected   | 25.4 Not Detect  | Fam183b       | 9.407407407 | 38.7037037 | 0.79127726 | 3.2554517 |
| A_55_P1989 | 4 Not Detect    | 30.7 Detected    | 13.2 Not Detect  | 37.6 Not Detect  | Ntng1         | 9.4         | 3.3        | 1.2247557  | 0.4299674 |

|            |        |            |         |            |         |            |         |            |               |             |            |            |           |
|------------|--------|------------|---------|------------|---------|------------|---------|------------|---------------|-------------|------------|------------|-----------|
| A_51_P1839 | 14.6   | Not Detect | 49.4    | Detected   | 68.4    | Detected   | 136.5   | Detected   | Il27ra        | 9.349315068 | 4.68493151 | 2.76315789 | 1.3846154 |
| A_55_P2031 | 9.3    | Not Detect | 52.6    | Detected   | 25.6    | Detected   | 86.8    | Detected   | Gstm6         | 9.333333333 | 2.75268817 | 1.65019011 | 0.486692  |
| A_52_P3111 | 64.9   | Detected   | 200.8   | Detected   | 262.7   | Detected   | 605.7   | Detected   | Krt78         | 9.332819723 | 4.04776579 | 3.01643426 | 1.3082669 |
| A_55_P2262 | 19.1   | Detected   | 32.5    | Detected   | 33.9    | Detected   | 178.2   | Detected   | Gm671         | 9.329842932 | 1.77486911 | 5.48307692 | 1.0430769 |
| A_51_P4461 | 3175.6 | Detected   | 11083.5 | Detected   | 17876.5 | Detected   | 29455.5 | Detected   | Gipc2         | 9.275569971 | 5.62932989 | 2.65759913 | 1.612893  |
| A_55_P2020 | 94.4   | Detected   | 1164.8  | Detected   | 315.6   | Detected   | 875.2   | Detected   | Mum11i        | 9.271186441 | 3.34322034 | 0.75137363 | 0.2709478 |
| A_51_P3682 | 23.8   | Detected   | 14.1    | Not Detect | 562.7   | Detected   | 220.5   | Detected   | Fam101a       | 9.264705882 | 23.6428571 | 15.6382979 | 39.907801 |
| A_55_P2037 | 2.7    | Not Detect | 34.7    | Detected   | 30.8    | Detected   | 25      | Not Detect | Rgs20         | 9.259259259 | 11.4074074 | 0.7204611  | 0.8876081 |
| A_55_P2006 | 9.6    | Not Detect | 38.7    | Detected   | 69.8    | Detected   | 88.8    | Detected   | Krt12         | 9.25        | 7.27083333 | 2.29457364 | 1.8036176 |
| A_55_P2038 | 2.9    | Not Detect | 21.9    | Detected   | 6.2     | Not Detect | 26.8    | Not Detect | Acot6         | 9.24137931  | 2.13793103 | 1.22374429 | 0.283105  |
| A_55_P2067 | 377.3  | Detected   | 1824.8  | Detected   | 870.7   | Detected   | 3485.6  | Detected   | Ush1c         | 9.238271932 | 2.3077127  | 1.91012714 | 0.4771482 |
| A_55_P2105 | 34.3   | Detected   | 53.9    | Detected   | 296.3   | Detected   | 316.4   | Detected   | Foxp1         | 9.224489796 | 8.63848397 | 5.87012987 | 5.4972171 |
| A_55_P2067 | 1082.9 | Detected   | 2540.3  | Detected   | 5515.9  | Detected   | 9980.5  | Detected   | Camsap3       | 9.216455813 | 5.09363745 | 3.92886667 | 2.1713577 |
| A_55_P2054 | 81.1   | Detected   | 239.8   | Detected   | 289.9   | Detected   | 747.4   | Detected   | Krt78         | 9.215782984 | 3.57459926 | 3.11676397 | 1.2089241 |
| A_51_P3067 | 8.3    | Not Detect | 10      | Not Detect | 29.4    | Detected   | 76.4    | Detected   | 2810055G2ORik | 9.204819277 | 3.54216867 | 7.64       | 2.94      |
| A_66_P1295 | 26.2   | Detected   | 162.3   | Detected   | 25.8    | Detected   | 240.8   | Detected   | Unc5c         | 9.190839695 | 0.98473282 | 1.48367221 | 0.1589649 |
| A_51_P4594 | 6.4    | Not Detect | 12.9    | Not Detect | 3.3     | Not Detect | 58.7    | Detected   | Tmco5         | 9.171875    | 0.515625   | 4.5503876  | 0.255814  |
| A_66_P1081 | 2.7    | Not Detect | 25.1    | Detected   | 3.1     | Not Detect | 24.7    | Not Detect | Car5a         | 9.148148148 | 1.14814815 | 0.98406375 | 0.123506  |
| A_55_P2275 | 12.9   | Not Detect | 45      | Detected   | 3.4     | Not Detect | 118     | Detected   | 2900005J15Rik | 9.147286822 | 0.26356589 | 2.62222222 | 0.0755556 |
| A_55_P2056 | 902.7  | Detected   | 1134.4  | Detected   | 5144.5  | Detected   | 8239.7  | Detected   | Hsd17b14      | 9.127838706 | 5.69901407 | 7.26348731 | 4.5349965 |
| A_55_P2009 | 258.9  | Detected   | 625.6   | Detected   | 1746.3  | Detected   | 2362    | Detected   | Ccdc28a       | 9.123213596 | 6.74507532 | 3.77557545 | 2.7914003 |
| A_55_P1953 | 215.8  | Detected   | 524.1   | Detected   | 298.4   | Detected   | 1963.8  | Detected   | Me3           | 9.100092678 | 1.38276182 | 3.74699485 | 0.569357  |
| A_55_P1954 | 58.3   | Detected   | 284.2   | Detected   | 419.4   | Detected   | 529.3   | Detected   | Lrtm2         | 9.07890223  | 7.19382504 | 1.86242083 | 1.4757213 |
| A_65_P1109 | 477.7  | Detected   | 613.6   | Detected   | 2983.1  | Detected   | 4335.2  | Detected   | Tspan15       | 9.075151769 | 6.24471426 | 7.06518905 | 4.8616362 |
| A_55_P1953 | 118.4  | Detected   | 282.9   | Detected   | 169.5   | Detected   | 1071    | Detected   | Me3           | 9.045608108 | 1.43158784 | 3.78579003 | 0.5991516 |
| A_52_P6019 | 292.3  | Detected   | 205.3   | Detected   | 2257.5  | Detected   | 2641.7  | Detected   | C4bp          | 9.037632569 | 7.72322956 | 12.867511  | 10.996103 |
| A_52_P6152 | 11.5   | Not Detect | 16.6    | Detected   | 24.7    | Detected   | 103.8   | Detected   | Nsun3         | 9.026086957 | 2.14782609 | 6.25301205 | 1.4879518 |
| A_51_P3056 | 11.6   | Not Detect | 7.5     | Not Detect | 33.6    | Detected   | 104.7   | Detected   | Atp8a2        | 9.025862069 | 2.89655172 | 13.96      | 4.48      |
| A_51_P3609 | 276.1  | Detected   | 917.6   | Detected   | 1761.7  | Detected   | 2483.5  | Detected   | Ehd3          | 8.994929373 | 6.38065918 | 2.706517   | 1.9198997 |
| A_55_P1991 | 17.2   | Detected   | 15.7    | Not Detect | 9.5     | Not Detect | 154.7   | Detected   | A830010M20Rik | 8.994186047 | 0.55232558 | 9.85350318 | 0.6050955 |
| A_55_P1965 | 180.2  | Detected   | 623.5   | Detected   | 893.9   | Detected   | 1617    | Detected   | Gm15085       | 8.97336293  | 4.96059933 | 2.59342422 | 1.4336808 |
| A_52_P2848 | 156.3  | Detected   | 314.5   | Detected   | 415     | Detected   | 1402    | Detected   | Prkcz         | 8.969929623 | 2.65515035 | 4.45786963 | 1.3195548 |
| A_51_P4019 | 520.4  | Detected   | 6604.6  | Detected   | 3557.1  | Detected   | 4663    | Detected   | Tmem37        | 8.960415065 | 6.83531899 | 0.70602307 | 0.5385792 |
| A_51_P4527 | 124.6  | Detected   | 78.6    | Detected   | 801.1   | Detected   | 1109.9  | Detected   | Cyp4f14       | 8.907704655 | 6.429374   | 14.1208651 | 10.192112 |
| A_66_P1248 | 71.7   | Detected   | 23.1    | Detected   | 635.7   | Detected   | 637.3   | Detected   | Sptssb        | 8.888423989 | 8.86610879 | 27.5887446 | 27.519481 |
| A_51_P5089 | 105.6  | Detected   | 210.8   | Detected   | 275.4   | Detected   | 937.8   | Detected   | Prr15         | 8.880681818 | 2.60795455 | 4.4487666  | 1.3064516 |
| A_55_P2157 | 637.3  | Detected   | 899.7   | Detected   | 1498.7  | Detected   | 5650.9  | Detected   | Myo7b         | 8.866938647 | 2.35163973 | 6.2808714  | 1.6657775 |
| A_55_P2069 | 11.5   | Not Detect | 26.3    | Detected   | 154.5   | Detected   | 101.7   | Detected   | Kiss1         | 8.843478261 | 13.4347826 | 3.86692015 | 5.8745247 |
| A_55_P2090 | 10.4   | Not Detect | 10.1    | Not Detect | 3.6     | Not Detect | 91.8    | Detected   | Pde10a        | 8.826923077 | 0.34615385 | 9.08910891 | 0.3564356 |
| A_51_P3532 | 3431.4 | Detected   | 7239.6  | Detected   | 25084.8 | Detected   | 30266.6 | Detected   | Mal2          | 8.820481436 | 7.31036895 | 4.18070059 | 3.4649428 |

|            |                 |                 |                  |                  |               |             |            |            |           |
|------------|-----------------|-----------------|------------------|------------------|---------------|-------------|------------|------------|-----------|
| A_55_P2101 | 677.9 Detected  | 795.9 Detected  | 10517.3 Detected | 5974.8 Detected  | Cd55          | 8.813689335 | 15.5145302 | 7.50697324 | 13.214349 |
| A_51_P2529 | 70.7 Detected   | 198.3 Detected  | 13.7 Not Detect  | 621.6 Detected   | Isx           | 8.792079208 | 0.19377652 | 3.13464448 | 0.0690872 |
| A_52_P5977 | 5.8 Not Detect  | 27.8 Detected   | 15.5 Not Detect  | 50.8 Detected    | Robo2         | 8.75862069  | 2.67241379 | 1.82733813 | 0.557554  |
| A_55_P1980 | 71.5 Detected   | 148.3 Detected  | 322.8 Detected   | 622.6 Detected   | Birc3         | 8.707692308 | 4.51468531 | 4.1982468  | 2.1766689 |
| A_55_P2291 | 2.8 Not Detect  | 31.7 Detected   | 5.8 Not Detect   | 24.3 Not Detect  | 5430435K18Rik | 8.678571429 | 2.07142857 | 0.76656151 | 0.1829653 |
| A_51_P1651 | 38.6 Detected   | 238.4 Detected  | 835.1 Detected   | 334.4 Detected   | Batf2         | 8.663212435 | 21.634715  | 1.40268456 | 3.5029362 |
| A_51_P3500 | 24.1 Detected   | 34.7 Detected   | 55.3 Detected    | 208.6 Detected   | Gstt2         | 8.65560166  | 2.29460581 | 6.01152738 | 1.5936599 |
| A_55_P1960 | 175.8 Detected  | 393.6 Detected  | 310.9 Detected   | 1520.1 Detected  | Slc2a6        | 8.646757679 | 1.76848692 | 3.86204268 | 0.7898882 |
| A_55_P2139 | 2.8 Not Detect  | 5 Not Detect    | 17.3 Detected    | 24.2 Not Detect  | Slc22a28      | 8.642857143 | 6.17857143 | 4.84       | 3.46      |
| A_55_P1985 | 6.6 Not Detect  | 12.7 Not Detect | 133.4 Detected   | 56.9 Detected    | Sytl3         | 8.621212121 | 20.2121212 | 4.48031496 | 10.503937 |
| A_66_P1063 | 308.1 Detected  | 321 Detected    | 5124.4 Detected  | 2655 Detected    | Daf2          | 8.617332035 | 16.6322623 | 8.27102804 | 15.963863 |
| A_55_P2313 | 52.2 Detected   | 190.2 Detected  | 138.9 Detected   | 449.4 Detected   | Ptprb         | 8.609195402 | 2.66091954 | 2.36277603 | 0.7302839 |
| A_66_P1097 | 37.5 Detected   | 15.5 Not Detect | 8 Not Detect     | 322 Detected     | 1700123I01Rik | 8.586666667 | 0.21333333 | 20.7741935 | 0.516129  |
| A_55_P1959 | 2.8 Not Detect  | 3.4 Not Detect  | 25.3 Detected    | 24 Not Detect    | Ces2e         | 8.571428571 | 9.03571429 | 7.05882353 | 7.4411765 |
| A_66_P1328 | 111.1 Detected  | 342.9 Detected  | 449.4 Detected   | 951.6 Detected   | Myzap         | 8.565256526 | 4.0450045  | 2.77515311 | 1.3105862 |
| A_52_P5934 | 15.7 Detected   | 73.2 Detected   | 36.3 Detected    | 133.5 Detected   | Arap2         | 8.503184713 | 2.31210191 | 1.82377049 | 0.4959016 |
| A_51_P4388 | 30.4 Detected   | 111.2 Detected  | 35.6 Detected    | 258.4 Detected   | Serpib1       | 8.5         | 1.17105263 | 2.32374101 | 0.3201439 |
| A_55_P1955 | 595.8 Detected  | 4310.4 Detected | 9435.4 Detected  | 5063.3 Detected  | Tfr2          | 8.498321584 | 15.8365223 | 1.17467056 | 2.1889848 |
| A_52_P4712 | 44.4 Detected   | 106.3 Detected  | 60.4 Detected    | 376 Detected     | Fmo4          | 8.468468468 | 1.36036036 | 3.53715898 | 0.5682032 |
| A_51_P5129 | 8.5 Not Detect  | 16.3 Not Detect | 9.2 Not Detect   | 71.5 Detected    | Spsb4         | 8.411764706 | 1.08235294 | 4.38650307 | 0.5644172 |
| A_51_P4849 | 74 Detected     | 166.6 Detected  | 460.6 Detected   | 621.6 Detected   | Cblc          | 8.4         | 6.22432432 | 3.73109244 | 2.7647059 |
| A_52_P6232 | 11.3 Not Detect | 12.7 Not Detect | 80.9 Detected    | 94.8 Detected    | Fut2          | 8.389380531 | 7.15929204 | 7.46456693 | 6.3700787 |
| A_52_P1440 | 90.1 Detected   | 75.3 Detected   | 83.8 Detected    | 754.7 Compromis  | Gcc1          | 8.376248613 | 0.93007769 | 10.0225764 | 1.1128818 |
| A_55_P2003 | 32.6 Detected   | 76.2 Detected   | 54.3 Detected    | 272.7 Detected   | P4ha1         | 8.365030675 | 1.66564417 | 3.57874016 | 0.7125984 |
| A_55_P2021 | 24.6 Detected   | 43.5 Detected   | 3.9 Not Detect   | 205.4 Detected   | Tmem181b-ps   | 8.349593496 | 0.15853659 | 4.72183908 | 0.0896552 |
| A_51_P3958 | 8 Not Detect    | 3.6 Not Detect  | 6.9 Not Detect   | 66.4 Detected    | Olfra401      | 8.3         | 0.8625     | 18.4444444 | 1.9166667 |
| A_55_P2021 | 22.4 Detected   | 33.2 Detected   | 69.3 Detected    | 185.5 Detected   | Adra2a        | 8.28125     | 3.09375    | 5.5873494  | 2.0873494 |
| A_51_P2457 | 2871.5 Detected | 9245 Detected   | 9269.7 Detected  | 23667.5 Detected | Ddit4         | 8.242207905 | 3.22817343 | 2.56003245 | 1.0026717 |
| A_52_P1148 | 24.3 Detected   | 35.9 Detected   | 471.1 Detected   | 200 Detected     | Upk3b         | 8.230452675 | 19.3868313 | 5.57103064 | 13.122563 |
| A_55_P2106 | 11.6 Not Detect | 199 Detected    | 6 Not Detect     | 95 Detected      | Dnah2         | 8.189655172 | 0.51724138 | 0.47738693 | 0.0301508 |
| A_55_P2116 | 355.6 Detected  | 2080.8 Detected | 471 Detected     | 2909.7 Detected  | Cyp2c38       | 8.182508436 | 1.32452193 | 1.3983564  | 0.2263552 |
| A_55_P2112 | 3.8 Not Detect  | 50 Detected     | 30 Detected      | 31 Not Detect    | Tmem145       | 8.157894737 | 7.89473684 | 0.62       | 0.6       |
| A_55_P2142 | 65.1 Detected   | 39.7 Detected   | 45.6 Detected    | 530.9 Detected   | Zkscan7       | 8.155145929 | 0.70046083 | 13.372796  | 1.1486146 |
| A_55_P2066 | 51.7 Detected   | 40.3 Detected   | 41 Detected      | 420.9 Detected   | Acsm1         | 8.141199226 | 0.79303675 | 10.4441687 | 1.0173697 |
| A_55_P2146 | 25 Detected     | 101 Detected    | 496.3 Detected   | 203.4 Detected   | Abca4         | 8.136       | 19.852     | 2.01386139 | 4.9138614 |
| A_55_P2095 | 5.3 Not Detect  | 32.8 Detected   | 31.8 Detected    | 42.9 Detected    | 1700028K03Rik | 8.094339623 | 6          | 1.30792683 | 0.9695122 |
| A_51_P3557 | 9.6 Not Detect  | 18 Not Detect   | 7.1 Not Detect   | 77.7 Detected    | Hic1          | 8.09375     | 0.73958333 | 4.31666667 | 0.3944444 |
| A_55_P1955 | 14.9 Detected   | 38.2 Detected   | 81.8 Detected    | 119.4 Detected   | Gm8437        | 8.013422819 | 5.48993289 | 3.12565445 | 2.1413613 |
| A_55_P2083 | 8.6 Not Detect  | 11.2 Not Detect | 9 Not Detect     | 68.9 Detected    | 1700001J03Rik | 8.011627907 | 1.04651163 | 6.15178571 | 0.8035714 |
| A_55_P2428 | 20.2 Detected   | 11.4 Not Detect | 29.2 Detected    | 161.6 Detected   | Lrrc2         | 8           | 1.44554455 | 14.1754386 | 2.5614035 |

|            |         |            |         |            |         |            |         |            |              |             |            |            |           |
|------------|---------|------------|---------|------------|---------|------------|---------|------------|--------------|-------------|------------|------------|-----------|
| A_55_P2103 | 52.9    | Detected   | 305.9   | Detected   | 172.2   | Detected   | 423     | Detected   | Ankrd29      | 7.996219282 | 3.25519849 | 1.38280484 | 0.5629291 |
| A_51_P1262 | 13.7    | Not Detect | 530.1   | Detected   | 29      | Detected   | 109.3   | Detected   | Krt6b        | 7.97810219  | 2.11678832 | 0.20618751 | 0.0547067 |
| A_55_P2041 | 16.6    | Detected   | 27.7    | Detected   | 21      | Detected   | 132.4   | Detected   | Il15ra       | 7.975903614 | 1.26506024 | 4.77978339 | 0.7581227 |
| A_51_P3987 | 213.6   | Detected   | 72      | Detected   | 74.4    | Detected   | 1696.5  | Detected   | Flt1         | 7.94241573  | 0.34831461 | 23.5625    | 1.0333333 |
| A_55_P2113 | 69.3    | Detected   | 9.4     | Not Detect | 325     | Detected   | 549.3   | Compromis  | Serpina1e    | 7.926406926 | 4.68975469 | 58.4361702 | 34.574468 |
| A_55_P1957 | 7.7     | Not Detect | 3.6     | Not Detect | 5.5     | Not Detect | 60.8    | Detected   | Olfir930     | 7.896103896 | 0.71428571 | 16.8888889 | 1.5277778 |
| A_52_P2276 | 335.3   | Detected   | 455     | Detected   | 3115.5  | Detected   | 2641.9  | Detected   | Map2         | 7.879212645 | 9.29167909 | 5.80637363 | 6.8472527 |
| A_51_P1530 | 301.5   | Detected   | 4056.3  | Detected   | 912.8   | Detected   | 2375.4  | Detected   | Smpdl3a      | 7.878606965 | 3.02752902 | 0.58560757 | 0.2250327 |
| A_55_P1964 | 40.3    | Detected   | 276.6   | Detected   | 29.8    | Detected   | 317.5   | Detected   | Arhgef6      | 7.878411911 | 0.73945409 | 1.14786696 | 0.1077368 |
| A_51_P2835 | 92.8    | Detected   | 1535.8  | Detected   | 33.1    | Detected   | 731     | Detected   | Abca13       | 7.877155172 | 0.35668103 | 0.47597343 | 0.0215523 |
| A_51_P2463 | 12307.9 | Detected   | 33703.4 | Detected   | 30148.5 | Detected   | 96845.6 | Detected   | Mt2          | 7.868572218 | 2.44952429 | 2.87346677 | 0.894524  |
| A_52_P2162 | 9.7     | Not Detect | 3.7     | Not Detect | 10.5    | Not Detect | 76.2    | Detected   | Masp1        | 7.855670103 | 1.08247423 | 20.5945946 | 2.8378378 |
| A_51_P5078 | 188.9   | Detected   | 1073.7  | Detected   | 119.8   | Detected   | 1482.6  | Detected   | F13a1        | 7.848597141 | 0.63419799 | 1.38083263 | 0.1115768 |
| A_66_P1302 | 7.7     | Not Detect | 7.5     | Not Detect | 4.3     | Not Detect | 60.3    | Detected   | Gm13941      | 7.831168831 | 0.55844156 | 8.04       | 0.5733333 |
| A_52_P4479 | 4.5     | Not Detect | 195.7   | Detected   | 3.7     | Not Detect | 35.2    | Not Detect | Epcam        | 7.822222222 | 0.82222222 | 0.17986714 | 0.0189065 |
| A_55_P1971 | 2.7     | Not Detect | 15.3    | Detected   | 3.1     | Not Detect | 21.1    | Not Detect | Nlrp4e       | 7.814814815 | 1.14814815 | 1.37908497 | 0.2026144 |
| A_51_P1618 | 124.4   | Detected   | 136.6   | Detected   | 1691.4  | Detected   | 971.1   | Detected   | Fcgrt        | 7.806270096 | 13.596463  | 7.1090776  | 12.382138 |
| A_55_P2024 | 1021.1  | Detected   | 803.6   | Detected   | 2134.6  | Detected   | 7963.9  | Detected   | Gstt1        | 7.799334052 | 2.09049065 | 9.91027875 | 2.6562967 |
| A_55_P2013 | 820.9   | Detected   | 878.8   | Detected   | 414.3   | Detected   | 6381.2  | Detected   | LOC101056200 | 7.773419418 | 0.50468997 | 7.26126536 | 0.4714383 |
| A_52_P2220 | 12.1    | Not Detect | 17.1    | Detected   | 32.7    | Detected   | 94      | Detected   | Chrn2        | 7.768595041 | 2.70247934 | 5.49707602 | 1.9122807 |
| A_51_P2243 | 9.5     | Not Detect | 21      | Detected   | 20      | Detected   | 73.8    | Detected   | Popdc2       | 7.768421053 | 2.10526316 | 3.51428571 | 0.952381  |
| A_66_P1141 | 13.7    | Not Detect | 8.3     | Not Detect | 12      | Not Detect | 106.4   | Detected   | LOC100862627 | 7.766423358 | 0.87591241 | 12.8192771 | 1.4457831 |
| A_51_P2909 | 7.4     | Not Detect | 49.9    | Detected   | 20.5    | Detected   | 57.3    | Detected   | Ptprb        | 7.743243243 | 2.77027027 | 1.14829659 | 0.4108216 |
| A_55_P2008 | 8.1     | Not Detect | 9       | Not Detect | 5.8     | Not Detect | 62.6    | Detected   | Tmsb15b1     | 7.728395062 | 0.71604938 | 6.95555556 | 0.6444444 |
| A_51_P5176 | 9.9     | Not Detect | 97.4    | Detected   | 3.4     | Not Detect | 76.5    | Detected   | Rnf152       | 7.727272727 | 0.34343434 | 0.78542094 | 0.0349076 |
| A_52_P6253 | 10.5    | Not Detect | 26.4    | Detected   | 21.3    | Detected   | 81.1    | Detected   | Cabp4        | 7.723809524 | 2.02857143 | 3.0719697  | 0.8068182 |
| A_52_P6191 | 147.4   | Detected   | 493.6   | Detected   | 753.5   | Detected   | 1133.8  | Detected   | Rundc3b      | 7.691994573 | 5.1119403  | 2.29700162 | 1.5265397 |
| A_52_P6055 | 40      | Detected   | 39      | Detected   | 91.9    | Detected   | 307.4   | Detected   | Nxn12        | 7.685       | 2.2975     | 7.88205128 | 2.3564103 |
| A_51_P2133 | 5.2     | Not Detect | 63.2    | Detected   | 6.3     | Not Detect | 39.9    | Not Detect | Has2         | 7.673076923 | 1.21153846 | 0.63132911 | 0.0996835 |
| A_55_P2106 | 301.4   | Detected   | 327.6   | Detected   | 395.4   | Detected   | 2301.4  | Compromis  | C5ar2        | 7.635700066 | 1.3118779  | 7.02503053 | 1.2069597 |
| A_51_P4662 | 57.8    | Detected   | 734.2   | Detected   | 549.9   | Detected   | 441.3   | Detected   | Amhr2        | 7.634948097 | 9.51384083 | 0.60106238 | 0.7489785 |
| A_51_P1202 | 267.9   | Detected   | 387.1   | Detected   | 2920.1  | Detected   | 2038.1  | Detected   | Cyp2d26      | 7.607689436 | 10.8999627 | 5.26504779 | 7.5435288 |
| A_55_P2110 | 512     | Detected   | 1085.9  | Detected   | 1999.1  | Detected   | 3888.6  | Detected   | Akap7        | 7.594921875 | 3.90449219 | 3.58099272 | 1.8409614 |
| A_55_P2131 | 51.2    | Detected   | 278.2   | Detected   | 88      | Detected   | 388.5   | Detected   | Trim40       | 7.587890625 | 1.71875    | 1.39647735 | 0.3163192 |
| A_51_P4492 | 313.7   | Detected   | 216.7   | Detected   | 1831.4  | Detected   | 2373.6  | Detected   | Thsd4        | 7.566464775 | 5.83806184 | 10.9533918 | 8.4513152 |
| A_52_P3406 | 76.4    | Detected   | 746.9   | Detected   | 136.8   | Detected   | 577.9   | Detected   | Bhlha15      | 7.564136126 | 1.79057592 | 0.77373142 | 0.183157  |
| A_51_P5014 | 3.1     | Not Detect | 3.8     | Not Detect | 196.5   | Detected   | 23.4    | Not Detect | Ms4a8a       | 7.548387097 | 63.3870968 | 6.15789474 | 51.710526 |
| A_55_P2032 | 444.7   | Detected   | 1144.5  | Detected   | 2797.2  | Detected   | 3342.6  | Detected   | Cblc         | 7.516527996 | 6.2900832  | 2.92057667 | 2.4440367 |
| A_52_P5036 | 3000.2  | Detected   | 2839.9  | Detected   | 9974.5  | Detected   | 22544.7 | Detected   | Ffar4        | 7.51439904  | 3.32461169 | 7.93855417 | 3.5122716 |
| A_55_P2078 | 6.2     | Not Detect | 23.5    | Detected   | 9.2     | Not Detect | 46.4    | Not Detect | AI662270     | 7.483870968 | 1.48387097 | 1.97446809 | 0.3914894 |



|            |                 |                  |                  |                  |               |             |            |            |           |
|------------|-----------------|------------------|------------------|------------------|---------------|-------------|------------|------------|-----------|
| A_55_P2090 | 10.4 Not Detect | 53.5 Detected    | 40.2 Detected    | 77.6 Detected    | Myh15         | 7.461538462 | 3.86538462 | 1.45046729 | 0.7514019 |
| A_55_P2099 | 15.2 Detected   | 16.6 Not Detect  | 16.7 Not Detect  | 113.4 Detected   | Abt1          | 7.460526316 | 1.09868421 | 6.8313253  | 1.0060241 |
| A_55_P2007 | 2612.3 Detected | 1910.2 Detected  | 26169.6 Detected | 19466.4 Detected | Akr1c19       | 7.451824063 | 10.0178387 | 10.1907654 | 13.699927 |
| A_55_P2258 | 116 Detected    | 327.1 Detected   | 209.5 Detected   | 863.8 Detected   | 8030425K09Rik | 7.446551724 | 1.80603448 | 2.64078264 | 0.6404769 |
| A_52_P6955 | 101.8 Detected  | 241.2 Detected   | 609.8 Detected   | 752 Detected     | Gm8221        | 7.387033399 | 5.99017682 | 3.11774461 | 2.5281924 |
| A_51_P4700 | 7.4 Not Detect  | 62.5 Detected    | 3.6 Not Detect   | 54.4 Detected    | Il1r2         | 7.351351351 | 0.48648649 | 0.8704     | 0.0576    |
| A_55_P2004 | 2.6 Not Detect  | 20.6 Detected    | 3 Not Detect     | 19.1 Not Detect  | Ptchd1        | 7.346153846 | 1.15384615 | 0.92718447 | 0.1456311 |
| A_55_P2043 | 80.4 Detected   | 251.7 Detected   | 298.5 Detected   | 590 Detected     | Luzp4         | 7.338308458 | 3.71268657 | 2.34406039 | 1.1859356 |
| A_55_P1975 | 20.4 Detected   | 13.3 Not Detect  | 8.2 Not Detect   | 149.7 Detected   | Tgif2lx2      | 7.338235294 | 0.40196078 | 11.2556391 | 0.6165414 |
| A_55_P2243 | 3 Not Detect    | 18.8 Detected    | 3.7 Not Detect   | 22 Not Detect    | Redrum        | 7.333333333 | 1.23333333 | 1.17021277 | 0.1968085 |
| A_51_P3338 | 17.5 Detected   | 186.6 Detected   | 12.3 Not Detect  | 128.2 Detected   | Clvs2         | 7.325714286 | 0.70285714 | 0.68703108 | 0.0659164 |
| A_55_P2121 | 1034.8 Detected | 2605.6 Detected  | 3127 Detected    | 7554.2 Detected  | Fam43a        | 7.300154619 | 3.02183997 | 2.89921707 | 1.2001075 |
| A_52_P5965 | 119.6 Detected  | 253.1 Detected   | 1265.7 Detected  | 871.4 Detected   | Rassf9        | 7.285953177 | 10.5827759 | 3.44290794 | 5.0007902 |
| A_51_P3794 | 58.3 Detected   | 90.2 Detected    | 49.5 Detected    | 424.5 Detected   | Nckap5        | 7.281303602 | 0.8490566  | 4.70620843 | 0.5487805 |
| A_55_P2312 | 64 Detected     | 43.4 Detected    | 24 Detected      | 463.1 Detected   | BB070754      | 7.2359375   | 0.375      | 10.6705069 | 0.5529954 |
| A_66_P1091 | 29.6 Detected   | 143.4 Detected   | 28.8 Detected    | 214.1 Detected   | Apold1        | 7.233108108 | 0.97297297 | 1.4930265  | 0.2008368 |
| A_55_P2089 | 3.1 Not Detect  | 36.2 Detected    | 3.8 Not Detect   | 22.4 Not Detect  | Caps2         | 7.225806452 | 1.22580645 | 0.61878453 | 0.1049724 |
| A_52_P8780 | 107.4 Detected  | 397 Detected     | 1702.7 Detected  | 776 Detected     | Mfsd4         | 7.225325885 | 15.8538175 | 1.95465995 | 4.2889169 |
| A_55_P2114 | 6.3 Not Detect  | 42.5 Detected    | 3.7 Not Detect   | 45.4 Not Detect  | Ccdc162       | 7.206349206 | 0.58730159 | 1.06823529 | 0.0870588 |
| A_51_P3371 | 2.7 Not Detect  | 17.4 Detected    | 3.1 Not Detect   | 19.4 Not Detect  | Inpp5d        | 7.185185185 | 1.14814815 | 1.11494253 | 0.1781609 |
| A_51_P1177 | 2.7 Not Detect  | 40.4 Detected    | 7.7 Not Detect   | 19.4 Not Detect  | Bik           | 7.185185185 | 2.85185185 | 0.48019802 | 0.1905941 |
| A_55_P2186 | 2.8 Not Detect  | 15.2 Not Detect  | 28.9 Detected    | 20.1 Not Detect  | Gm9866        | 7.178571429 | 10.3214286 | 1.32236842 | 1.9013158 |
| A_52_P3004 | 5.7 Not Detect  | 26.5 Detected    | 90.5 Detected    | 40.9 Not Detect  | Atp4a         | 7.175438596 | 15.877193  | 1.54339623 | 3.4150943 |
| A_66_P1350 | 8.8 Not Detect  | 3.5 Not Detect   | 3.5 Not Detect   | 62.8 Detected    | Gm5531        | 7.136363636 | 0.39772727 | 17.9428571 | 1         |
| A_55_P2022 | 9.2 Not Detect  | 28.3 Detected    | 38.7 Detected    | 65.5 Detected    | Spata22       | 7.119565217 | 4.20652174 | 2.31448763 | 1.3674912 |
| A_52_P9104 | 1414.1 Detected | 9123.2 Detected  | 3053.7 Detected  | 10059.8 Detected | Tprg          | 7.113924051 | 2.15946538 | 1.10266135 | 0.3347181 |
| A_55_P2105 | 477.7 Detected  | 472.9 Detected   | 243.3 Detected   | 3397.3 Detected  | Nrxn3         | 7.11178564  | 0.50931547 | 7.18397124 | 0.5144851 |
| A_55_P2463 | 476.5 Detected  | 467.4 Detected   | 541.6 Detected   | 3387.5 Compromis | Zfp398        | 7.109129066 | 1.1366212  | 7.24753958 | 1.1587505 |
| A_55_P2139 | 67 Detected     | 144.4 Detected   | 282.5 Detected   | 476.1 Detected   | Camsap3       | 7.105970149 | 4.21641791 | 3.29709141 | 1.9563712 |
| A_52_P3753 | 17.1 Detected   | 6495.6 Detected  | 56 Detected      | 121.5 Detected   | Amica1        | 7.105263158 | 3.2748538  | 0.01870497 | 0.0086212 |
| A_52_P5234 | 1716 Detected   | 2265.4 Detected  | 1577.2 Detected  | 12192.6 Detected | Cdhr5         | 7.105244755 | 0.91911422 | 5.38209588 | 0.6962126 |
| A_51_P2770 | 2.9 Not Detect  | 224.7 Detected   | 3.5 Not Detect   | 20.6 Not Detect  | Chst8         | 7.103448276 | 1.20689655 | 0.09167779 | 0.0155763 |
| A_55_P2097 | 7.6 Not Detect  | 10.4 Not Detect  | 10.4 Not Detect  | 53.8 Detected    | Pth2          | 7.078947368 | 1.36842105 | 5.17307692 | 1         |
| A_55_P2038 | 9772.1 Detected | 14606.1 Detected | 61491.5 Detected | 69087.9 Detected | Ano1          | 7.069913325 | 6.29255738 | 4.73007168 | 4.2099876 |
| A_51_P1009 | 109.5 Detected  | 268 Detected     | 116.5 Detected   | 772 Detected     | Gucy2c        | 7.050228311 | 1.06392694 | 2.88059701 | 0.4347015 |
| A_66_P1190 | 6 Not Detect    | 3.4 Not Detect   | 246.2 Detected   | 42.2 Not Detect  | Smarca1       | 7.033333333 | 41.0333333 | 12.4117647 | 72.411765 |
| A_51_P3423 | 8 Not Detect    | 63.3 Detected    | 23.7 Detected    | 56.2 Detected    | Apoh          | 7.025       | 2.9625     | 0.8878357  | 0.3744076 |
| A_52_P2461 | 7.4 Not Detect  | 7.2 Not Detect   | 85.9 Detected    | 51.9 Detected    | Cbln3         | 7.013513514 | 11.6081081 | 7.20833333 | 11.930556 |
| A_55_P2085 | 34 Detected     | 96.2 Detected    | 279.7 Detected   | 238 Detected     | Calr3         | 7           | 8.22647059 | 2.47401247 | 2.9074844 |
| A_55_P2015 | 78.9 Detected   | 474.7 Detected   | 134.4 Detected   | 551.7 Detected   | Phf11d        | 6.992395437 | 1.70342205 | 1.16220771 | 0.2831262 |

|            |                 |                 |                  |                  |               |             |            |            |           |
|------------|-----------------|-----------------|------------------|------------------|---------------|-------------|------------|------------|-----------|
| A_66_P1351 | 20.5 Detected   | 137.6 Detected  | 21.3 Detected    | 143.1 Detected   | Etv1          | 6.980487805 | 1.03902439 | 1.03997093 | 0.1547965 |
| A_66_P1050 | 437.9 Detected  | 816.2 Detected  | 1427.1 Detected  | 3051.2 Detected  | Il18          | 6.967800868 | 3.25896323 | 3.73829944 | 1.7484685 |
| A_55_P2070 | 35 Detected     | 26.3 Detected   | 7.5 Not Detect   | 243.1 Detected   | Speer2        | 6.945714286 | 0.21428571 | 9.24334601 | 0.2851711 |
| A_55_P2115 | 176.4 Detected  | 121.4 Detected  | 1465.3 Detected  | 1225.2 Detected  | Clec2d        | 6.945578231 | 8.30668934 | 10.092257  | 12.070016 |
| A_66_P1207 | 72.5 Detected   | 277.3 Detected  | 148.9 Detected   | 503.5 Detected   | Bnip3         | 6.944827586 | 2.0537931  | 1.81572304 | 0.5369636 |
| A_52_P5069 | 2.8 Not Detect  | 47 Detected     | 3.3 Not Detect   | 19.4 Not Detect  | Plet1         | 6.928571429 | 1.17857143 | 0.41276596 | 0.0702128 |
| A_55_P1994 | 7.4 Not Detect  | 4.1 Not Detect  | 3.4 Not Detect   | 51.1 Detected    | Vmn2r20       | 6.905405405 | 0.45945946 | 12.4634146 | 0.8292683 |
| A_55_P2023 | 3.9 Not Detect  | 111.4 Detected  | 20.4 Detected    | 26.9 Not Detect  | Slc47a1       | 6.897435897 | 5.23076923 | 0.24147217 | 0.1831239 |
| A_55_P1988 | 33.6 Detected   | 78.6 Detected   | 54.1 Detected    | 231.7 Detected   | 4930558N11Rik | 6.895833333 | 1.61011905 | 2.94783715 | 0.6882952 |
| A_51_P2061 | 17.4 Detected   | 8.9 Not Detect  | 162.8 Detected   | 119.2 Detected   | 9130230L23Rik | 6.850574713 | 9.35632184 | 13.3932584 | 18.292135 |
| A_51_P3080 | 36.6 Detected   | 123.9 Detected  | 226.2 Detected   | 250.4 Detected   | 2010107G23Rik | 6.841530055 | 6.18032787 | 2.02098467 | 1.8256659 |
| A_52_P7833 | 11.7 Not Detect | 53.9 Detected   | 48.1 Detected    | 80 Detected      | Lrrc29        | 6.837606838 | 4.11111111 | 1.48423006 | 0.8923933 |
| A_55_P2059 | 136.4 Detected  | 154 Detected    | 1168.4 Detected  | 931.9 Detected   | Map2          | 6.832111437 | 8.5659824  | 6.0512987  | 7.587013  |
| A_55_P2070 | 11.8 Not Detect | 3.1 Not Detect  | 3.1 Not Detect   | 80.6 Detected    | Galnt18       | 6.830508475 | 0.26271186 | 26         | 1         |
| A_55_P2010 | 45.3 Detected   | 61 Detected     | 169.7 Detected   | 308.7 Detected   | Prrt2         | 6.814569536 | 3.74613687 | 5.06065574 | 2.7819672 |
| A_51_P1701 | 3 Not Detect    | 77.1 Detected   | 3.7 Not Detect   | 20.4 Not Detect  | B3gnt8        | 6.8         | 1.23333333 | 0.26459144 | 0.0479896 |
| A_55_P2110 | 530.8 Detected  | 978.3 Detected  | 1861.2 Detected  | 3608.5 Detected  | Akap7         | 6.798229088 | 3.50640543 | 3.68854135 | 1.9024839 |
| A_51_P3158 | 375.8 Detected  | 879.6 Detected  | 708.3 Detected   | 2554.4 Detected  | Kcnk6         | 6.797232571 | 1.88477914 | 2.90404729 | 0.8052524 |
| A_55_P2198 | 7.8 Not Detect  | 3.8 Not Detect  | 138.9 Detected   | 53 Detected      | Gm10768       | 6.794871795 | 17.8076923 | 13.9473684 | 36.552632 |
| A_55_P2032 | 15.1 Not Detect | 215.9 Detected  | 66.2 Detected    | 102.6 Detected   | Fhit          | 6.794701987 | 4.38410596 | 0.47522001 | 0.3066234 |
| A_52_P4185 | 2.9 Not Detect  | 65.7 Detected   | 3.4 Not Detect   | 19.7 Not Detect  | 1700007G11Rik | 6.793103448 | 1.17241379 | 0.29984779 | 0.0517504 |
| A_66_P1217 | 852.7 Detected  | 858.4 Detected  | 3135.1 Detected  | 5781.4 Detected  | Samd9l        | 6.780110238 | 3.67667409 | 6.73508854 | 3.65226   |
| A_51_P2052 | 533.7 Detected  | 3115.6 Detected | 1060.8 Detected  | 3614.9 Detected  | Klhl30        | 6.773280869 | 1.9876335  | 1.16025806 | 0.3404802 |
| A_66_P1241 | 80.8 Detected   | 94.4 Detected   | 67.6 Detected    | 547.2 Detected   | Adams17       | 6.772277228 | 0.83663366 | 5.79661017 | 0.7161017 |
| A_52_P6823 | 2172.1 Detected | 3860.6 Detected | 10189.4 Detected | 14692.9 Detected | Scd1          | 6.764375489 | 4.69103632 | 3.80585919 | 2.6393307 |
| A_51_P4768 | 65.1 Detected   | 154.8 Detected  | 551.3 Detected   | 439.6 Detected   | Calr3         | 6.752688172 | 8.46850998 | 2.83979328 | 3.5613695 |
| A_51_P2337 | 1136.5 Detected | 1540.2 Detected | 6246.8 Detected  | 7673.6 Detected  | Adh7          | 6.751957765 | 5.49652442 | 4.9822101  | 4.0558369 |
| A_55_P2064 | 8.6 Not Detect  | 5.6 Not Detect  | 3.8 Not Detect   | 57.9 Detected    | Defb36        | 6.73255814  | 0.44186047 | 10.3392857 | 0.6785714 |
| A_55_P2151 | 23.3 Detected   | 5 Not Detect    | 3.5 Not Detect   | 156.7 Detected   | Sorl1         | 6.725321888 | 0.15021459 | 31.34      | 0.7       |
| A_55_P2166 | 20.2 Detected   | 62.5 Detected   | 26.6 Detected    | 135.8 Detected   | Vmn1r65       | 6.722772277 | 1.31683168 | 2.1728     | 0.4256    |
| A_51_P1106 | 1537.9 Detected | 2139 Detected   | 7016.2 Detected  | 10291.3 Detected | Mst1r         | 6.691787502 | 4.5621952  | 4.81126695 | 3.2801309 |
| A_55_P2069 | 637.3 Detected  | 314.7 Detected  | 2835.7 Detected  | 4260 Detected    | Gm10639       | 6.684450024 | 4.4495528  | 13.5367016 | 9.0108039 |
| A_51_P1315 | 59.8 Detected   | 657.5 Detected  | 91.2 Detected    | 399.6 Detected   | Plet1         | 6.682274247 | 1.52508361 | 0.60775665 | 0.1387072 |
| A_55_P2151 | 1194.5 Detected | 1175.5 Detected | 4158.7 Detected  | 7974 Detected    | Samd9l        | 6.675596484 | 3.48154039 | 6.78349638 | 3.5378137 |
| A_55_P2033 | 67.5 Detected   | 236.8 Detected  | 294.4 Detected   | 449.5 Detected   | Ece2          | 6.659259259 | 4.36148148 | 1.89822635 | 1.2432432 |
| A_55_P2131 | 60.3 Detected   | 157.6 Detected  | 89.1 Detected    | 400.8 Detected   | Pdia2         | 6.646766169 | 1.47761194 | 2.54314721 | 0.5653553 |
| A_52_P2715 | 68.8 Detected   | 123.6 Detected  | 216.5 Detected   | 456.4 Detected   | Ece2          | 6.63372093  | 3.14680233 | 3.69255663 | 1.7516181 |
| A_55_P2256 | 8.1 Not Detect  | 11.7 Not Detect | 63.7 Detected    | 53.7 Detected    | 1110028F18Rik | 6.62962963  | 7.86419753 | 4.58974359 | 5.4444444 |
| A_55_P1958 | 146.4 Detected  | 164.5 Detected  | 524.1 Detected   | 970.5 Detected   | Slit1         | 6.629098361 | 3.57991803 | 5.89969605 | 3.1860182 |
| A_52_P5713 | 360.4 Detected  | 887.7 Detected  | 1037.5 Detected  | 2386.8 Detected  | Tmem144       | 6.622641509 | 2.87874584 | 2.6887462  | 1.1687507 |

|            |                  |                   |                   |                   |               |             |            |            |           |
|------------|------------------|-------------------|-------------------|-------------------|---------------|-------------|------------|------------|-----------|
| A_55_P2144 | 412.3 Detected   | 398.2 Detected    | 1797.1 Detected   | 2721.4 Detected   | Dmbt1         | 6.600533592 | 4.35871938 | 6.83425414 | 4.5130588 |
| A_55_P2158 | 4476.4 Detected  | 3832.7 Detected   | 1833.1 Detected   | 29494.4 Detected  | Clca4         | 6.588866053 | 0.40950317 | 7.69546273 | 0.478279  |
| A_55_P2162 | 12.4 Not Detect  | 29.9 Detected     | 21.8 Detected     | 80.9 Detected     | Ccdc149       | 6.524193548 | 1.75806452 | 2.70568562 | 0.729097  |
| A_55_P2127 | 31.1 Detected    | 23.2 Detected     | 20.7 Detected     | 202.6 Detected    | Spata17       | 6.514469453 | 0.66559486 | 8.73275862 | 0.8922414 |
| A_51_P4952 | 71.6 Detected    | 118.1 Detected    | 1146.6 Detected   | 465.5 Detected    | Lor           | 6.501396648 | 16.0139665 | 3.94157494 | 9.7087214 |
| A_55_P2050 | 17.4 Detected    | 21.6 Detected     | 45.7 Detected     | 113.1 Detected    | Olfra469      | 6.5         | 2.62643678 | 5.23611111 | 2.1157407 |
| A_66_P1263 | 425.4 Detected   | 612.9 Detected    | 887.3 Detected    | 2755.9 Detected   | Rhof          | 6.478373296 | 2.0858016  | 4.49649209 | 1.4477076 |
| A_55_P1960 | 4.6 Not Detect   | 17.1 Detected     | 19.6 Detected     | 29.8 Not Detect   | Kif9          | 6.47826087  | 4.26086957 | 1.74269006 | 1.1461988 |
| A_51_P2343 | 304.7 Detected   | 1549.7 Detected   | 567.9 Detected    | 1969.8 Detected   | Sct           | 6.464719396 | 1.86380046 | 1.27108473 | 0.366458  |
| A_55_P2261 | 72.8 Detected    | 267.7 Detected    | 202 Detected      | 469.7 Detected    | C230098O21Rik | 6.451923077 | 2.77472527 | 1.75457602 | 0.754576  |
| A_51_P3815 | 767.9 Detected   | 1052.8 Detected   | 658.7 Detected    | 4951 Detected     | Rasa4         | 6.447454096 | 0.85779398 | 4.70269757 | 0.6256649 |
| A_52_P4748 | 30.4 Detected    | 61.3 Detected     | 45.2 Detected     | 196 Detected      | 4921506M07Rik | 6.447368421 | 1.48684211 | 3.19738989 | 0.7373573 |
| A_52_P5301 | 3.1 Not Detect   | 29.2 Detected     | 3.7 Not Detect    | 19.9 Not Detect   | Rhbdl3        | 6.419354839 | 1.19354839 | 0.68150685 | 0.1267123 |
| A_55_P2043 | 220.6 Detected   | 231.1 Detected    | 677.1 Detected    | 1415.2 Detected   | Arsg          | 6.415231188 | 3.0693563  | 6.12375595 | 2.9299005 |
| A_52_P1952 | 14.5 Not Detect  | 7.2 Not Detect    | 5.5 Not Detect    | 92.9 Detected     | Esyt3         | 6.406896552 | 0.37931034 | 12.9027778 | 0.7638889 |
| A_52_P5644 | 82.4 Detected    | 197.3 Detected    | 507.4 Detected    | 527.3 Detected    | Pik3c2g       | 6.399271845 | 6.15776699 | 2.67257983 | 2.5717182 |
| A_55_P2082 | 25 Detected      | 172.8 Detected    | 84.7 Detected     | 159.4 Detected    | Ttbk1         | 6.376       | 3.388      | 0.9224537  | 0.490162  |
| A_51_P4139 | 16.8 Detected    | 9.6 Not Detect    | 12.2 Not Detect   | 107.1 Detected    | Hmx3          | 6.375       | 0.72619048 | 11.15625   | 1.2708333 |
| A_55_P2178 | 47.7 Detected    | 215 Detected      | 43.8 Detected     | 303.3 Detected    | Tll1          | 6.358490566 | 0.91823899 | 1.41069767 | 0.2037209 |
| A_55_P2253 | 103.2 Detected   | 290.4 Detected    | 382.8 Detected    | 655.1 Detected    | 4933407E14Rik | 6.347868217 | 3.70930233 | 2.25585399 | 1.3181818 |
| A_55_P2029 | 115.5 Detected   | 100.6 Detected    | 111.2 Detected    | 732.7 Compromis   | Lcorl         | 6.343722944 | 0.96277056 | 7.2833002  | 1.1053678 |
| A_51_P2409 | 75.4 Detected    | 353.7 Detected    | 297.3 Detected    | 478.2 Detected    | Plekhg6       | 6.342175066 | 3.94297082 | 1.35199321 | 0.8405428 |
| A_52_P5528 | 137.2 Detected   | 206.1 Detected    | 400.2 Detected    | 869.9 Detected    | Efcab4a       | 6.340379009 | 2.91690962 | 4.22076662 | 1.9417758 |
| A_52_P5364 | 357.6 Detected   | 177.5 Detected    | 1928 Detected     | 2265.4 Detected   | Mycn          | 6.335011186 | 5.39149888 | 12.7628169 | 10.861972 |
| A_66_P1156 | 5.7 Not Detect   | 21.7 Detected     | 8.8 Not Detect    | 36.1 Not Detect   | G630018N14Rik | 6.333333333 | 1.54385965 | 1.66359447 | 0.40553   |
| A_52_P5508 | 8.1 Not Detect   | 191.9 Detected    | 19.9 Detected     | 51.3 Detected     | Samd12        | 6.333333333 | 2.45679012 | 0.26732673 | 0.1036998 |
| A_51_P2342 | 1609.3 Detected  | 2296.1 Detected   | 7461.1 Detected   | 10165.3 Detected  | Sdcbp2        | 6.316597278 | 4.63623936 | 4.42720265 | 3.2494665 |
| A_52_P1850 | 47.2 Detected    | 27.6 Detected     | 77.1 Detected     | 298 Detected      | 1110035H17Rik | 6.313559322 | 1.63347458 | 10.7971014 | 2.7934783 |
| A_55_P1973 | 48 Detected      | 233 Detected      | 55.7 Detected     | 302.9 Detected    | Ceacam16      | 6.310416667 | 1.16041667 | 1.3        | 0.2390558 |
| A_55_P2064 | 113.1 Detected   | 148.1 Detected    | 181.9 Detected    | 712.8 Detected    | Lrrc61        | 6.302387268 | 1.60831123 | 4.81296421 | 1.2282242 |
| A_52_P4976 | 14.9 Detected    | 98.2 Detected     | 101.4 Detected    | 93.8 Detected     | A630001G21Rik | 6.295302013 | 6.80536913 | 0.95519348 | 1.0325866 |
| A_55_P2045 | 800.1 Detected   | 1212.2 Detected   | 5523.6 Detected   | 5024.8 Detected   | Stk32a        | 6.280214973 | 6.90363705 | 4.14519056 | 4.5566738 |
| A_55_P2011 | 49.7 Detected    | 58.9 Detected     | 3.3 Not Detect    | 311.1 Detected    | Armcx1        | 6.259557344 | 0.06639839 | 5.28183362 | 0.0560272 |
| A_55_P1987 | 1010.5 Detected  | 1521.4 Detected   | 818.6 Detected    | 6324.6 Detected   | Unc13b        | 6.258881742 | 0.81009401 | 4.15709215 | 0.5380571 |
| A_55_P2175 | 19.2 Detected    | 6.7 Not Detect    | 18.5 Detected     | 119.7 Detected    | Gm5486        | 6.234375    | 0.96354167 | 17.8656716 | 2.761194  |
| A_52_P5633 | 74306.3 Detected | 154486.9 Detected | 371515.1 Detected | 463117.3 Detected | Lgals2        | 6.232544212 | 4.99977929 | 2.99777716 | 2.4048324 |
| A_52_P9452 | 2.7 Not Detect   | 30.8 Detected     | 3.1 Not Detect    | 16.8 Not Detect   | 2510009E07Rik | 6.222222222 | 1.14814815 | 0.54545455 | 0.1006494 |
| A_52_P4599 | 501.7 Detected   | 884 Detected      | 3167 Detected     | 3116.2 Detected   | Itga1         | 6.211281642 | 6.31253737 | 3.52511312 | 3.5825792 |
| A_55_P2022 | 115.9 Detected   | 139.3 Detected    | 77.9 Detected     | 719.2 Detected    | Ghrl          | 6.205349439 | 0.67213115 | 5.16295765 | 0.5592247 |
| A_51_P2648 | 8.9 Not Detect   | 37 Detected       | 36.9 Detected     | 55.2 Detected     | Lag3          | 6.202247191 | 4.14606742 | 1.49189189 | 0.9972973 |

|            |        |            |         |            |         |            |         |            |               |             |            |            |           |
|------------|--------|------------|---------|------------|---------|------------|---------|------------|---------------|-------------|------------|------------|-----------|
| A_55_P2113 | 2027.1 | Detected   | 775.3   | Detected   | 26127.2 | Detected   | 12543.9 | Detected   | Mal           | 6.188101228 | 12.8889547 | 16.1794144 | 33.699471 |
| A_51_P5192 | 7690.5 | Detected   | 27722.3 | Detected   | 18021.2 | Detected   | 47572.9 | Detected   | Nupr1         | 6.185930694 | 2.34330668 | 1.7160517  | 0.6500615 |
| A_55_P2047 | 2112.8 | Detected   | 1502.3  | Detected   | 14454.4 | Detected   | 13042.2 | Detected   | Fgf1          | 6.172945854 | 6.84134797 | 8.68148838 | 9.6215137 |
| A_51_P4861 | 3.1    | Not Detect | 25.1    | Detected   | 3.8     | Not Detect | 19.1    | Not Detect | Aff3          | 6.161290323 | 1.22580645 | 0.76095618 | 0.1513944 |
| A_52_P6573 | 34.5   | Detected   | 169.2   | Detected   | 105.6   | Detected   | 212.5   | Detected   | Tnni1         | 6.15942029  | 3.06086957 | 1.25591017 | 0.6241135 |
| A_55_P2118 | 527.9  | Detected   | 538     | Detected   | 273.8   | Detected   | 3249.1  | Detected   | 4930404H24Rik | 6.15476416  | 0.51865884 | 6.03921933 | 0.5089219 |
| A_51_P1815 | 14.7   | Detected   | 25.8    | Detected   | 20.5    | Detected   | 90.3    | Detected   | Fcgr4         | 6.142857143 | 1.39455782 | 3.5        | 0.7945736 |
| A_55_P1967 | 8.1    | Not Detect | 3.5     | Not Detect | 149.9   | Detected   | 49.7    | Not Detect | Ugt2b35       | 6.135802469 | 18.5061728 | 14.2       | 42.828571 |
| A_55_P2130 | 81.5   | Detected   | 116.5   | Detected   | 254.1   | Detected   | 499.6   | Detected   | Prdm11        | 6.13006135  | 3.11779141 | 4.28841202 | 2.1811159 |
| A_52_P7478 | 4.7    | Not Detect | 10.6    | Not Detect | 25.2    | Detected   | 28.8    | Not Detect | 9130204L05Rik | 6.127659574 | 5.36170213 | 2.71698113 | 2.3773585 |
| A_51_P4192 | 2156.3 | Detected   | 4888.4  | Detected   | 4875.4  | Detected   | 13185.6 | Detected   | S100a14       | 6.114919074 | 2.26100264 | 2.69732428 | 0.9973406 |
| A_55_P2179 | 17.6   | Detected   | 12.9    | Not Detect | 53.2    | Detected   | 107.4   | Detected   | Nmur2         | 6.102272727 | 3.02272727 | 8.3255814  | 4.124031  |
| A_51_P5060 | 715.5  | Detected   | 3041.9  | Detected   | 920.3   | Detected   | 4366    | Detected   | Cpq           | 6.102026555 | 1.2862334  | 1.43528716 | 0.3025412 |
| A_51_P1103 | 88.2   | Detected   | 424.4   | Detected   | 246     | Detected   | 537     | Detected   | Wwox          | 6.088435374 | 2.78911565 | 1.26531574 | 0.5796418 |
| A_55_P1978 | 2.9    | Not Detect | 26.3    | Detected   | 3       | Not Detect | 17.6    | Not Detect | Ifih1         | 6.068965517 | 1.03448276 | 0.66920152 | 0.1140684 |
| A_55_P1996 | 23.3   | Detected   | 1781.3  | Detected   | 6       | Not Detect | 141.3   | Detected   | Amy2a5        | 6.064377682 | 0.25751073 | 0.07932409 | 0.0033683 |
| A_51_P4916 | 7.5    | Not Detect | 6.7     | Not Detect | 41.4    | Detected   | 45.4    | Not Detect | Ly6g6e        | 6.053333333 | 5.52       | 6.7761194  | 6.1791045 |
| A_55_P1970 | 115.7  | Detected   | 353.7   | Detected   | 335.9   | Detected   | 696.8   | Detected   | Gramd2        | 6.02247191  | 2.90319793 | 1.9700311  | 0.9496749 |
| A_51_P2154 | 1899.6 | Detected   | 6328.3  | Detected   | 4674.5  | Detected   | 11428.4 | Detected   | Ptprb         | 6.01621394  | 2.46078122 | 1.80591944 | 0.738666  |
| A_51_P2154 | 527.1  | Detected   | 1120.7  | Detected   | 2438.8  | Detected   | 3170.8  | Detected   | Slc37a1       | 6.01555682  | 4.62682603 | 2.82930311 | 2.1761399 |
| A_52_P2057 | 3.8    | Not Detect | 97.6    | Detected   | 3.3     | Not Detect | 22.8    | Not Detect | Myl10         | 6           | 0.86842105 | 0.23360656 | 0.0338115 |
| A_55_P2367 | 7.6    | Not Detect | 13.9    | Not Detect | 24.8    | Detected   | 45.5    | Detected   | C330020G15Rik | 5.986842105 | 3.26315789 | 3.27338129 | 1.7841727 |
| A_55_P1987 | 383.6  | Detected   | 634.3   | Detected   | 1013    | Detected   | 2295.2  | Detected   | Prkcz         | 5.983315954 | 2.64077164 | 3.61847706 | 1.5970361 |
| A_55_P2139 | 2807.8 | Detected   | 2344.6  | Detected   | 7596.8  | Detected   | 16775.2 | Detected   | Gm5595        | 5.974499608 | 2.70560581 | 7.15482385 | 3.2401262 |
| A_55_P2068 | 312.3  | Detected   | 379.8   | Detected   | 434.3   | Detected   | 1863.5  | Detected   | 1700016K19Rik | 5.967018892 | 1.39065002 | 4.90652975 | 1.1434966 |
| A_55_P2075 | 53.3   | Detected   | 350.5   | Detected   | 134.6   | Detected   | 318     | Detected   | Ube2dn1       | 5.966228893 | 2.52532833 | 0.90727532 | 0.3840228 |
| A_52_P3194 | 500.9  | Detected   | 1554.9  | Detected   | 848     | Detected   | 2986.7  | Detected   | Ankrd37       | 5.962667199 | 1.69295269 | 1.92083092 | 0.5453727 |
| A_55_P2173 | 27     | Detected   | 34.2    | Detected   | 22.2    | Detected   | 160.9   | Detected   | Myh6          | 5.959259259 | 0.82222222 | 4.70467836 | 0.6491228 |
| A_52_P4267 | 157.3  | Detected   | 289.9   | Detected   | 436.4   | Detected   | 937.2   | Detected   | Rab27a        | 5.958041958 | 2.77431659 | 3.23283891 | 1.5053467 |
| A_51_P3554 | 30.6   | Detected   | 24      | Detected   | 28.6    | Detected   | 182.3   | Detected   | Timp4         | 5.95751634  | 0.93464052 | 7.59583333 | 1.1916667 |
| A_51_P2950 | 27.9   | Detected   | 813.4   | Detected   | 3.4     | Not Detect | 166.1   | Detected   | Ogn           | 5.953405018 | 0.1218638  | 0.20420457 | 0.00418   |
| A_51_P4977 | 574    | Detected   | 1256.1  | Detected   | 3090.8  | Detected   | 3416.2  | Detected   | Apol7a        | 5.951567944 | 5.38466899 | 2.71968792 | 2.4606321 |
| A_55_P2095 | 2.7    | Not Detect | 3       | Not Detect | 17      | Detected   | 16      | Not Detect | Gucy1a2       | 5.925925926 | 6.2962963  | 5.33333333 | 5.6666667 |
| A_55_P2236 | 2.7    | Not Detect | 4       | Not Detect | 21.3    | Detected   | 16      | Not Detect | Syt16         | 5.925925926 | 7.88888889 | 4          | 5.325     |
| A_51_P3253 | 7.8    | Not Detect | 384.4   | Detected   | 49.8    | Detected   | 46.1    | Detected   | Serinc2       | 5.91025641  | 6.38461538 | 0.11992716 | 0.1295525 |
| A_55_P2041 | 95.3   | Detected   | 82.1    | Detected   | 85      | Detected   | 563.1   | Detected   | Foxl2         | 5.908709339 | 0.89192025 | 6.85870889 | 1.0353228 |
| A_55_P2220 | 3.1    | Not Detect | 41.1    | Detected   | 47.9    | Detected   | 18.3    | Not Detect | Mep1b         | 5.903225806 | 15.4516129 | 0.44525547 | 1.1654501 |
| A_55_P1987 | 13.5   | Not Detect | 71      | Detected   | 14.2    | Not Detect | 79.6    | Detected   | Ptprd         | 5.896296296 | 1.05185185 | 1.12112676 | 0.2       |
| A_55_P1966 | 2.8    | Not Detect | 3741    | Detected   | 3.3     | Not Detect | 16.5    | Not Detect | Cxcl12        | 5.892857143 | 1.17857143 | 0.00441059 | 0.0008821 |
| A_55_P2133 | 73.2   | Detected   | 160.2   | Detected   | 87.7    | Detected   | 429.9   | Detected   | Pdia2         | 5.87295082  | 1.19808743 | 2.6835206  | 0.5474407 |

|            |                 |                 |                  |                  |               |             |            |            |           |
|------------|-----------------|-----------------|------------------|------------------|---------------|-------------|------------|------------|-----------|
| A_66_P1377 | 3.1 Not Detect  | 3.7 Not Detect  | 57.2 Detected    | 18.2 Not Detect  | Gm14661       | 5.870967742 | 18.4516129 | 4.91891892 | 15.459459 |
| A_55_P2015 | 30.6 Detected   | 9806.5 Detected | 38.4 Detected    | 179.3 Detected   | Fgf9          | 5.859477124 | 1.25490196 | 0.01828379 | 0.0039158 |
| A_51_P3681 | 97 Detected     | 120.5 Detected  | 45.6 Detected    | 567.7 Detected   | Nkx2-3        | 5.85257732  | 0.47010309 | 4.71120332 | 0.3784232 |
| A_55_P2367 | 53.6 Detected   | 284.1 Detected  | 49.1 Detected    | 313.4 Detected   | Pou4f1        | 5.847014925 | 0.91604478 | 1.1031327  | 0.1728265 |
| A_55_P2083 | 14.4 Not Detect | 33.7 Detected   | 47 Detected      | 83.9 Detected    | Vsig2         | 5.826388889 | 3.26388889 | 2.48961424 | 1.3946588 |
| A_55_P2092 | 21.7 Detected   | 17.5 Detected   | 13.7 Not Detect  | 126.3 Detected   | Trim43b       | 5.820276498 | 0.63133641 | 7.21714286 | 0.7828571 |
| A_66_P1187 | 446.3 Detected  | 812.6 Detected  | 1613 Detected    | 2595.9 Detected  | Tmem136       | 5.816491149 | 3.61416088 | 3.19456067 | 1.9849865 |
| A_55_P2013 | 12.3 Not Detect | 4 Not Detect    | 10.8 Not Detect  | 71.5 Detected    | D730005E14Rik | 5.81300813  | 0.87804878 | 17.875     | 2.7       |
| A_51_P3606 | 19.7 Detected   | 33.6 Detected   | 20.3 Detected    | 114.5 Detected   | Slc22a6       | 5.812182741 | 1.03045685 | 3.4077381  | 0.6041667 |
| A_55_P1964 | 41.7 Detected   | 92.9 Detected   | 227.9 Detected   | 241.9 Detected   | Apol7a        | 5.800959233 | 5.46522782 | 2.60387513 | 2.4531755 |
| A_51_P5063 | 188.2 Detected  | 429.6 Detected  | 125.9 Detected   | 1087.4 Detected  | Cyp2j6        | 5.777895855 | 0.66896918 | 2.53119181 | 0.2930633 |
| A_55_P2130 | 600.9 Detected  | 1822.3 Detected | 2914.9 Detected  | 3458.4 Detected  | Mical1        | 5.75536695  | 4.85089033 | 1.89782143 | 1.599572  |
| A_51_P1760 | 59.9 Detected   | 73 Detected     | 416.9 Detected   | 343.9 Detected   | Pklr          | 5.741235392 | 6.95993322 | 4.7109589  | 5.7109589 |
| A_55_P1991 | 1394 Detected   | 1374.6 Detected | 2850.8 Detected  | 7998.1 Detected  | Aplp1         | 5.737517934 | 2.04505022 | 5.81849265 | 2.0739124 |
| A_66_P1107 | 25.3 Detected   | 36.2 Detected   | 31.7 Detected    | 145.1 Detected   | Gm7244        | 5.735177866 | 1.25296443 | 4.00828729 | 0.8756906 |
| A_52_P1547 | 7632.8 Detected | 8686.9 Detected | 23514.3 Detected | 43711.2 Detected | Lgals6        | 5.726758201 | 3.08069123 | 5.03185256 | 2.706869  |
| A_55_P1972 | 9.3 Not Detect  | 8.4 Not Detect  | 3.3 Not Detect   | 53.2 Detected    | Tmeff1        | 5.720430108 | 0.35483871 | 6.33333333 | 0.3928571 |
| A_51_P5130 | 7.5 Not Detect  | 126.1 Detected  | 3.3 Not Detect   | 42.9 Not Detect  | Trps1         | 5.72        | 0.44       | 0.34020619 | 0.0261697 |
| A_52_P5324 | 2.8 Not Detect  | 82 Detected     | 8 Not Detect     | 16 Not Detect    | Plagl1        | 5.714285714 | 2.85714286 | 0.19512195 | 0.097561  |
| A_52_P4206 | 35.2 Detected   | 47.2 Detected   | 133.8 Detected   | 200.9 Detected   | Gm1631        | 5.707386364 | 3.80113636 | 4.25635593 | 2.8347458 |
| A_52_P4257 | 4.1 Not Detect  | 3.5 Not Detect  | 130.8 Detected   | 23.4 Not Detect  | Afm           | 5.707317073 | 31.902439  | 6.68571429 | 37.371429 |
| A_55_P2089 | 788.8 Detected  | 3500 Detected   | 1791 Detected    | 4501.5 Detected  | Ak4           | 5.706769777 | 2.27053753 | 1.28614286 | 0.5117143 |
| A_51_P3413 | 19 Detected     | 51.3 Detected   | 120.8 Detected   | 108.4 Detected   | Bcl2l14       | 5.705263158 | 6.35789474 | 2.11306043 | 2.3547758 |
| A_55_P2074 | 82.9 Detected   | 129.5 Detected  | 70.1 Detected    | 471.5 Detected   | Tet2          | 5.687575392 | 0.8455971  | 3.64092664 | 0.5413127 |
| A_55_P2341 | 3.2 Not Detect  | 69.9 Detected   | 3.8 Not Detect   | 18.2 Not Detect  | Rbms3         | 5.6875      | 1.1875     | 0.26037196 | 0.0543634 |
| A_55_P1994 | 5.6 Not Detect  | 177.1 Detected  | 28.1 Detected    | 31.8 Not Detect  | Serinc2       | 5.678571429 | 5.01785714 | 0.17955957 | 0.1586674 |
| A_55_P2051 | 2.7 Not Detect  | 15.3 Detected   | 13.8 Not Detect  | 15.3 Not Detect  | Gm13710       | 5.666666667 | 5.11111111 | 1          | 0.9019608 |
| A_55_P2148 | 14.9 Detected   | 30.2 Detected   | 83.1 Detected    | 84.4 Detected    | Apol7c        | 5.66442953  | 5.57718121 | 2.79470199 | 2.7516556 |
| A_55_P2113 | 204.3 Detected  | 631 Detected    | 332.3 Detected   | 1156.8 Detected  | Clybl         | 5.66226138  | 1.62652961 | 1.83328051 | 0.5266244 |
| A_55_P2399 | 15.1 Detected   | 38.7 Detected   | 84.8 Detected    | 85.3 Detected    | Glipr2        | 5.649006623 | 5.61589404 | 2.20413437 | 2.1912145 |
| A_51_P4011 | 61.2 Detected   | 1031.7 Detected | 9.1 Not Detect   | 345.7 Detected   | Rarres1       | 5.64869281  | 0.14869281 | 0.33507803 | 0.0088204 |
| A_51_P3382 | 1557.1 Detected | 8549.2 Detected | 9175 Detected    | 8793.3 Detected  | Tnnt2         | 5.647228823 | 5.89236401 | 1.02855238 | 1.0731998 |
| A_51_P3866 | 110.8 Detected  | 613.1 Detected  | 366.2 Detected   | 625.4 Detected   | Glod5         | 5.644404332 | 3.30505415 | 1.02006198 | 0.5972924 |
| A_55_P1964 | 91.8 Detected   | 233.7 Detected  | 317.2 Detected   | 516.6 Detected   | Gm5549        | 5.62745098  | 3.45533769 | 2.21052632 | 1.3572957 |
| A_55_P2277 | 19.6 Detected   | 56.6 Detected   | 85.8 Detected    | 110.2 Detected   | Loxl3         | 5.62244898  | 4.37755102 | 1.94699647 | 1.5159011 |
| A_51_P5082 | 5.8 Not Detect  | 28 Detected     | 51.7 Detected    | 32.6 Not Detect  | Ppm1n         | 5.620689655 | 8.9137931  | 1.16428571 | 1.8464286 |
| A_52_P8576 | 123.5 Detected  | 120.6 Detected  | 198.9 Detected   | 691.8 Compromis  | Stard6        | 5.601619433 | 1.61052632 | 5.73631841 | 1.6492537 |
| A_52_P5716 | 320.5 Detected  | 490.1 Detected  | 1015.3 Detected  | 1794.1 Detected  | Myo1a         | 5.597815913 | 3.16786271 | 3.66068149 | 2.071618  |
| A_55_P2000 | 12.3 Not Detect | 11.9 Not Detect | 37.9 Detected    | 68.7 Detected    | 8030411F24Rik | 5.585365854 | 3.08130081 | 5.77310924 | 3.1848739 |
| A_51_P4353 | 648.3 Detected  | 2990.5 Detected | 1189 Detected    | 3614 Detected    | Epor          | 5.57457967  | 1.83402746 | 1.20849356 | 0.3975924 |

|            |                 |                  |                  |                  |               |             |            |            |            |           |
|------------|-----------------|------------------|------------------|------------------|---------------|-------------|------------|------------|------------|-----------|
| A_52_P5476 | 26.1 Detected   | 11.7 Not Detect  | 3.7 Not Detect   | 145.4 Detected   | P2ry1         | 5.570881226 | 0.14176245 | 12.4273504 | 0.3162393  |           |
| A_51_P4854 | 17.9 Detected   | 29.6 Detected    | 47.8 Detected    | 99.7 Detected    | Lrrc71        | 5.569832402 | 2.67039106 | 3.36824324 | 1.6148649  |           |
| A_55_P2016 | 7.4 Not Detect  | 45.2 Detected    | 51.7 Detected    | 41.2 Not Detect  | Gstm7         | 5.567567568 | 6.98648649 | 0.91150442 | 1.1438053  |           |
| A_55_P2109 | 391.7 Detected  | 731.4 Detected   | 149.3 Detected   | 2171.5 Detected  | Camk2b        | 5.543783508 | 0.38115905 | 2.96896363 | 0.2041291  |           |
| A_52_P9201 | 486.5 Detected  | 20.2 Detected    | 3.9 Not Detect   | 2693 Detected    | Gnai1         | 5.535457348 | 0.00801644 | 133.316832 | 0.1930693  |           |
| A_66_P1380 | 3 Not Detect    | 3.6 Not Detect   | 21.3 Detected    | 16.6 Not Detect  | Gm9917        | 5.533333333 | 7.1        | 4.61111111 | 5.9166667  |           |
| A_51_P2514 | 12 Not Detect   | 45.6 Detected    | 54 Detected      | 66.4 Detected    | Nkapl         | 5.533333333 | 4.5        | 1.45614035 | 1.1842105  |           |
| A_51_P5186 | 6 Not Detect    | 78.5 Detected    | 26.6 Detected    | 33.2 Not Detect  | Atp6v1c2      | 5.533333333 | 4.43333333 | 0.42292994 | 0.3388535  |           |
| A_51_P1876 | 180.3 Detected  | 1143.3 Detected  | 1092.5 Detected  | 997.6 Detected   | Serpinb5      | 5.533000555 | 6.05934554 | 0.87256188 | 0.9555672  |           |
| A_55_P2006 | 4251.1 Detected | 9447.5 Detected  | 3922.6 Detected  | 23486.9 Detected | Serpinb1a     | 5.524899438 | 0.92272588 | 2.48604393 | 0.4151998  |           |
| A_55_P2073 | 145.6 Detected  | 117.8 Detected   | 176.1 Detected   | 804.4 Compromis  | Nos1          | 5.524725275 | 1.20947802 | 6.82852292 | 1.4949066  |           |
| A_55_P2155 | 613.4 Detected  | 3728.8 Detected  | 1058 Detected    | 3386.6 Detected  | Ankrd34a      | 5.521030323 | 1.72481252 | 0.90822785 | 0.2837374  |           |
| A_55_P2397 | 2.7 Not Detect  | 15.7 Detected    | 4.2 Not Detect   | 14.9 Not Detect  | Skida1        | 5.518518519 | 1.55555556 | 0.94904459 | 0.2675159  |           |
| A_55_P1998 | 245.8 Detected  | 786.2 Detected   | 47.3 Detected    | 1352.4 Detected  | Oas1a         | 5.502034174 | 0.19243287 | 1.72017298 | 0.0601628  |           |
| A_66_P1282 | 58.3 Detected   | 111.2 Detected   | 112.1 Detected   | 320.7 Detected   | Fam109b       | 5.500857633 | 1.92281304 | 2.88399281 | 1.0080935  |           |
| A_55_P2089 | 6.4 Not Detect  | 17.2 Detected    | 7.7 Not Detect   | 35.2 Not Detect  | Gm13547       |             | 5.5        | 1.203125   | 2.04651163 | 0.4476744 |
| A_51_P4800 | 46.7 Detected   | 86.5 Detected    | 163.7 Detected   | 256.8 Detected   | Car11         | 5.498929336 | 3.50535332 | 2.96878613 | 1.8924855  |           |
| A_55_P2073 | 10.9 Not Detect | 5.2 Not Detect   | 25.9 Detected    | 59.9 Detected    | Slc25a34      | 5.495412844 | 2.37614679 | 11.5192308 | 4.9807692  |           |
| A_55_P2436 | 27.6 Detected   | 275 Detected     | 123.2 Detected   | 151.4 Detected   | Dusp22        | 5.485507246 | 4.46376812 | 0.55054545 | 0.448      |           |
| A_55_P2000 | 3.1 Not Detect  | 21.6 Detected    | 19.6 Detected    | 17 Not Detect    | Ptpru         | 5.483870968 | 6.32258065 | 0.78703704 | 0.9074074  |           |
| A_55_P2096 | 17.5 Detected   | 9.8 Not Detect   | 8.5 Not Detect   | 95.9 Detected    | Cntln         |             | 5.48       | 0.48571429 | 9.78571429 | 0.8673469 |
| A_52_P4340 | 23 Detected     | 29.1 Detected    | 43.9 Detected    | 125.9 Detected   | Birc3         | 5.473913043 | 1.90869565 | 4.32646048 | 1.5085911  |           |
| A_52_P1183 | 26.3 Detected   | 51.9 Detected    | 55.7 Detected    | 143.7 Detected   | Chn1          | 5.463878327 | 2.11787072 | 2.76878613 | 1.0732177  |           |
| A_55_P2075 | 71 Detected     | 115.1 Detected   | 668.3 Detected   | 387.8 Detected   | S1pr5         | 5.461971831 | 9.41267606 | 3.36924414 | 5.8062554  |           |
| A_51_P1857 | 84.2 Detected   | 96.6 Detected    | 157.4 Detected   | 459.6 Detected   | Casz1         | 5.458432304 | 1.86935867 | 4.75776398 | 1.6293996  |           |
| A_55_P1962 | 47.4 Detected   | 186.6 Detected   | 29.5 Detected    | 258.7 Detected   | H2-Ab1        | 5.457805907 | 0.62236287 | 1.386388   | 0.1580922  |           |
| A_66_P1015 | 3.5 Not Detect  | 28.2 Detected    | 3.8 Not Detect   | 19.1 Not Detect  | Lrrc2         | 5.457142857 | 1.08571429 | 0.67730496 | 0.1347518  |           |
| A_51_P4064 | 119.6 Detected  | 263.2 Detected   | 167.3 Detected   | 652.6 Detected   | Ankrd35       | 5.456521739 | 1.39882943 | 2.47948328 | 0.6356383  |           |
| A_55_P2121 | 44.7 Detected   | 115.6 Detected   | 46.3 Detected    | 243.8 Detected   | Gck           | 5.454138702 | 1.03579418 | 2.10899654 | 0.400519   |           |
| A_55_P1992 | 7311.1 Detected | 40578.4 Detected | 10716.9 Detected | 39865.5 Detected | Il5ra         | 5.45273625  | 1.46583961 | 0.98243154 | 0.2641036  |           |
| A_55_P2353 | 132.1 Detected  | 666.6 Detected   | 441.3 Detected   | 720.1 Detected   | 9530036O11Rik | 5.451173354 | 3.34065102 | 1.08025803 | 0.6620162  |           |
| A_55_P2294 | 56.9 Detected   | 48 Detected      | 59 Detected      | 309.5 Detected   | 2900035I09Rik | 5.439367311 | 1.03690685 | 6.44791667 | 1.2291667  |           |
| A_51_P1297 | 2311.4 Detected | 2065.9 Detected  | 2762.4 Detected  | 12546.2 Detected | Tmigd1        | 5.427965735 | 1.19511984 | 6.07299482 | 1.3371412  |           |
| A_51_P4836 | 5703.3 Detected | 11889.5 Detected | 2399.3 Detected  | 30956.2 Detected | 0610040J01Rik | 5.427769888 | 0.42068627 | 2.60365869 | 0.2017999  |           |
| A_55_P2172 | 57.6 Detected   | 56.6 Detected    | 35.8 Detected    | 311.7 Detected   | Mrgpra2a      | 5.411458333 | 0.62152778 | 5.50706714 | 0.6325088  |           |
| A_51_P5062 | 3028.8 Detected | 1452.7 Detected  | 7493.8 Detected  | 16372.9 Detected | Cst9          | 5.405738246 | 2.47418119 | 11.2706684 | 5.1585324  |           |
| A_55_P2034 | 18.4 Detected   | 45.3 Detected    | 44.3 Detected    | 99.2 Detected    | Il12rb1       | 5.391304348 | 2.4076087  | 2.18984547 | 0.9779249  |           |
| A_51_P1303 | 42.2 Detected   | 40.4 Detected    | 30.8 Detected    | 227.3 Detected   | Hspa12b       | 5.386255924 | 0.72985782 | 5.62623762 | 0.7623762  |           |
| A_52_P5378 | 7 Not Detect    | 48.1 Detected    | 10.1 Not Detect  | 37.7 Not Detect  | Wdr72         | 5.385714286 | 1.44285714 | 0.78378378 | 0.2099792  |           |
| A_55_P2282 | 3.9 Not Detect  | 22 Detected      | 6.9 Not Detect   | 21 Not Detect    | 4933425M03Rik | 5.384615385 | 1.76923077 | 0.95454545 | 0.3136364  |           |

|            |                 |                  |                  |                  |                    |             |            |            |           |
|------------|-----------------|------------------|------------------|------------------|--------------------|-------------|------------|------------|-----------|
| A_55_P2173 | 2.6 Not Detect  | 2.9 Not Detect   | 326 Detected     | 14 Not Detect    | Plcb1              | 5.384615385 | 125.384615 | 4.82758621 | 112.41379 |
| A_51_P1258 | 1444.6 Detected | 857.7 Detected   | 10474.5 Detected | 7766.7 Detected  | Tmem51             | 5.37636716  | 7.25079607 | 9.05526408 | 12.212312 |
| A_55_P1960 | 102.3 Detected  | 168.2 Detected   | 265.9 Detected   | 549.9 Detected   | Tmem220            | 5.375366569 | 2.59921799 | 3.26932224 | 1.5808561 |
| A_55_P2063 | 12.1 Not Detect | 110.7 Detected   | 3.1 Not Detect   | 64.9 Detected    | Tmem74b            | 5.363636364 | 0.25619835 | 0.5862692  | 0.0280036 |
| A_55_P2031 | 318.6 Detected  | 546.6 Detected   | 785.3 Detected   | 1708.8 Detected  | Tmem220            | 5.36346516  | 2.4648462  | 3.12623491 | 1.4366996 |
| A_55_P1985 | 73 Detected     | 429.4 Detected   | 83.4 Detected    | 391.2 Detected   | Robo1              | 5.35890411  | 1.14246575 | 0.91103866 | 0.1942245 |
| A_55_P2097 | 9.6 Not Detect  | 23.1 Detected    | 29.8 Detected    | 51.4 Detected    | Camkv              | 5.354166667 | 3.10416667 | 2.22510823 | 1.2900433 |
| A_55_P2427 | 26.1 Detected   | 61.8 Detected    | 98.8 Detected    | 139.4 Detected   | 4921525O09Rik      | 5.340996169 | 3.78544061 | 2.25566343 | 1.5987055 |
| A_55_P2036 | 40.5 Detected   | 162.5 Detected   | 37.4 Detected    | 216.3 Detected   | Gm5797             | 5.340740741 | 0.92345679 | 1.33107692 | 0.2301538 |
| A_55_P2018 | 752.9 Detected  | 1260.9 Detected  | 2003.2 Detected  | 4019.7 Detected  | Ldhd               | 5.338956037 | 2.6606455  | 3.18796098 | 1.5887065 |
| A_55_P2069 | 32 Detected     | 43.2 Detected    | 405.9 Detected   | 170.8 Detected   | Kiss1              | 5.3375      | 12.684375  | 3.9537037  | 9.3958333 |
| A_55_P2052 | 26.5 Detected   | 100.4 Detected   | 10.1 Not Detect  | 141.4 Detected   | Rnf208             | 5.335849057 | 0.38113208 | 1.40836653 | 0.1005976 |
| A_55_P2022 | 4.2 Not Detect  | 32.2 Detected    | 8 Not Detect     | 22.4 Not Detect  | 1700019B21Rik      | 5.333333333 | 1.9047619  | 0.69565217 | 0.2484472 |
| A_55_P2078 | 6.4 Not Detect  | 22.7 Detected    | 5.5 Not Detect   | 34.1 Not Detect  | Gm3264             | 5.328125    | 0.859375   | 1.50220264 | 0.2422907 |
| A_52_P4800 | 85.2 Detected   | 29.1 Detected    | 19.3 Detected    | 453.5 Detected   | BC023105           | 5.322769953 | 0.22652582 | 15.5841924 | 0.6632302 |
| A_55_P2174 | 34.4 Detected   | 35.8 Detected    | 95.4 Detected    | 182.4 Detected   | Gm1631             | 5.302325581 | 2.77325581 | 5.09497207 | 2.6648045 |
| A_55_P1985 | 41.2 Detected   | 25.8 Detected    | 9 Not Detect     | 218.4 Detected   | Reps2              | 5.300970874 | 0.2184466  | 8.46511628 | 0.3488372 |
| A_55_P2080 | 172.9 Detected  | 331.4 Detected   | 107.7 Detected   | 916.2 Detected   | Cyp2j8             | 5.299016773 | 0.62290341 | 2.76463488 | 0.3249849 |
| A_55_P1987 | 16.4 Detected   | 8.5 Not Detect   | 17 Not Detect    | 86.9 Detected    | Nbeal1             | 5.298780488 | 1.03658537 | 10.2235294 | 2         |
| A_55_P2049 | 46.4 Detected   | 147.3 Detected   | 35.2 Detected    | 245.2 Detected   | Gm16525            | 5.284482759 | 0.75862069 | 1.66463001 | 0.2389681 |
| A_52_P3736 | 19 Detected     | 67.9 Detected    | 3.8 Not Detect   | 100.2 Detected   | Jph4               | 5.273684211 | 0.2        | 1.47569956 | 0.0559647 |
| A_51_P2688 | 422.3 Detected  | 119 Detected     | 217.8 Detected   | 2222.7 Detected  | Rasip1             | 5.263319915 | 0.5157471  | 18.6781513 | 1.8302521 |
| A_52_P4876 | 17.3 Detected   | 36.1 Detected    | 11.6 Not Detect  | 90.5 Detected    | BC100530           | 5.231213873 | 0.67052023 | 2.50692521 | 0.3213296 |
| A_55_P1985 | 97.2 Detected   | 129.9 Detected   | 18.2 Detected    | 508.3 Detected   | Compromis Fam171a2 | 5.229423868 | 0.1872428  | 3.91301001 | 0.1401078 |
| A_51_P3469 | 61.8 Detected   | 45 Detected      | 45.8 Detected    | 322.7 Detected   | Lrg1               | 5.221682848 | 0.74110032 | 7.17111111 | 1.0177778 |
| A_52_P1519 | 26.5 Detected   | 38.3 Detected    | 38 Detected      | 138.2 Detected   | Gm5132             | 5.21509434  | 1.43396226 | 3.60835509 | 0.9921671 |
| A_55_P2206 | 83.3 Detected   | 316.3 Detected   | 190.1 Detected   | 434.4 Detected   | 1810062O18Rik      | 5.214885954 | 2.28211285 | 1.3733797  | 0.6010117 |
| A_65_P0736 | 142 Detected    | 191.6 Detected   | 321.7 Detected   | 735.6 Detected   | Trim14             | 5.18028169  | 2.26549296 | 3.83924843 | 1.6790188 |
| A_55_P2019 | 58.5 Detected   | 58.6 Detected    | 35.5 Detected    | 302.9 Detected   | Mrgpra2b           | 5.177777778 | 0.60683761 | 5.16894198 | 0.605802  |
| A_55_P2149 | 216.5 Detected  | 630.5 Detected   | 218.7 Detected   | 1120.2 Detected  | Arap2              | 5.174133949 | 1.01016166 | 1.77668517 | 0.3468676 |
| A_55_P2091 | 4254.2 Detected | 13374.3 Detected | 8740.5 Detected  | 22011.4 Detected | Bnip3              | 5.174039772 | 2.05455785 | 1.64579828 | 0.6535295 |
| A_51_P1580 | 113.6 Detected  | 333.4 Detected   | 144 Detected     | 587.7 Detected   | A230050P20Rik      | 5.173415493 | 1.26760563 | 1.76274745 | 0.4319136 |
| A_55_P2186 | 35.5 Detected   | 94 Detected      | 50.9 Detected    | 183.4 Detected   | Saysd1             | 5.166197183 | 1.43380282 | 1.95106383 | 0.5414894 |
| A_55_P2075 | 179.8 Detected  | 353.1 Detected   | 871.5 Detected   | 924 Detected     | Arhgap40           | 5.139043382 | 4.84705228 | 2.61682243 | 2.4681393 |
| A_55_P2023 | 67.9 Detected   | 74 Detected      | 94.5 Detected    | 348.9 Detected   | Casz1              | 5.138438881 | 1.39175258 | 4.71486486 | 1.277027  |
| A_55_P2153 | 3.9 Not Detect  | 23.4 Detected    | 18.5 Detected    | 20 Not Detect    | Tmem217            | 5.128205128 | 4.74358974 | 0.85470085 | 0.7905983 |
| A_52_P4934 | 125.7 Detected  | 296.3 Detected   | 120.9 Detected   | 643.7 Detected   | Serpib1c           | 5.120922832 | 0.96181384 | 2.17246034 | 0.4080324 |
| A_52_P1321 | 7675 Detected   | 21498 Detected   | 11829.3 Detected | 39294.1 Detected | Hsd17b11           | 5.119752443 | 1.54127687 | 1.82780259 | 0.5502512 |
| A_55_P2169 | 8.6 Not Detect  | 20.4 Detected    | 20.1 Detected    | 43.9 Not Detect  | Pycr1              | 5.104651163 | 2.3372093  | 2.15196078 | 0.9852941 |
| A_55_P2218 | 10.8 Not Detect | 4.6 Not Detect   | 3.7 Not Detect   | 55.1 Detected    | A730093L10Rik      | 5.101851852 | 0.34259259 | 11.9782609 | 0.8043478 |

|            |                 |                  |                  |                  |               |             |            |            |           |
|------------|-----------------|------------------|------------------|------------------|---------------|-------------|------------|------------|-----------|
| A_52_P4364 | 78.2 Detected   | 130.4 Detected   | 245.3 Detected   | 398.9 Detected   | Slc25a35      | 5.101023018 | 3.13682864 | 3.05904908 | 1.881135  |
| A_51_P2552 | 15.5 Detected   | 3.7 Not Detect   | 5.7 Not Detect   | 79 Detected      | C9            | 5.096774194 | 0.36774194 | 21.3513514 | 1.5405405 |
| A_51_P3213 | 5.2 Not Detect  | 9.2 Not Detect   | 20.1 Detected    | 26.5 Not Detect  | Ppapdc3       | 5.096153846 | 3.86538462 | 2.88043478 | 2.1847826 |
| A_52_P5598 | 3.2 Not Detect  | 65.1 Detected    | 3.2 Not Detect   | 16.3 Not Detect  | Fbln7         | 5.09375     | 1          | 0.25038402 | 0.0491551 |
| A_55_P2028 | 2783.5 Detected | 4536.7 Detected  | 9101.8 Detected  | 14178 Detected   | Gata4         | 5.09358721  | 3.26991198 | 3.12517909 | 2.0062601 |
| A_51_P1736 | 936.9 Detected  | 2067 Detected    | 4963.2 Detected  | 4768.4 Detected  | Bcam          | 5.089550646 | 5.29747038 | 2.30691824 | 2.4011611 |
| A_55_P1962 | 4.6 Not Detect  | 30.7 Detected    | 9.1 Not Detect   | 23.4 Not Detect  | Gm8700        | 5.086956522 | 1.97826087 | 0.76221498 | 0.2964169 |
| A_55_P1988 | 33 Detected     | 34.6 Detected    | 27.2 Detected    | 167.4 Detected   | D830024N08Rik | 5.072727273 | 0.82424242 | 4.83815029 | 0.7861272 |
| A_55_P2010 | 15.4 Detected   | 12.1 Not Detect  | 18.2 Detected    | 78.1 Detected    | Zfp618        | 5.071428571 | 1.18181818 | 6.45454545 | 1.5041322 |
| A_55_P1962 | 290.9 Detected  | 1058.7 Detected  | 242.6 Detected   | 1474.6 Detected  | Il1rn         | 5.069095909 | 0.83396356 | 1.39284028 | 0.229149  |
| A_55_P2321 | 17.2 Detected   | 97.6 Detected    | 49.2 Detected    | 87.1 Detected    | Zfp882        | 5.063953488 | 2.86046512 | 0.89241803 | 0.5040984 |
| A_55_P2097 | 17.5 Detected   | 23.3 Detected    | 27.8 Detected    | 88.5 Detected    | Gm6219        | 5.057142857 | 1.58857143 | 3.79828326 | 1.193133  |
| A_52_P4097 | 53.9 Detected   | 131.1 Detected   | 218.8 Detected   | 272.5 Detected   | Mrvi1         | 5.055658627 | 4.0593692  | 2.07856598 | 1.668955  |
| A_52_P2995 | 12.6 Not Detect | 16.2 Not Detect  | 19.3 Detected    | 63.7 Detected    | Fam212b       | 5.055555556 | 1.53174603 | 3.93209877 | 1.191358  |
| A_51_P3988 | 10 Not Detect   | 17.2 Detected    | 10.2 Not Detect  | 50.5 Detected    | Tfp2d         | 5.05        | 1.02       | 2.93604651 | 0.5930233 |
| A_55_P2153 | 1420.9 Detected | 1692.9 Detected  | 3436.4 Detected  | 7152.6 Detected  | Ahnak         | 5.033851784 | 2.41846717 | 4.22505759 | 2.0298895 |
| A_55_P2034 | 253.1 Detected  | 178.3 Detected   | 505.4 Detected   | 1274 Detected    | Myom3         | 5.033583564 | 1.99683919 | 7.1452608  | 2.8345485 |
| A_55_P1952 | 3.8 Not Detect  | 17.7 Detected    | 4.6 Not Detect   | 19.1 Not Detect  | Ear2          | 5.026315789 | 1.21052632 | 1.07909605 | 0.259887  |
| A_55_P2013 | 32.3 Detected   | 30.1 Detected    | 28.7 Detected    | 162.2 Detected   | Gm3718        | 5.021671827 | 0.88854489 | 5.38870432 | 0.9534884 |
| A_55_P2082 | 137.9 Detected  | 150.6 Detected   | 63.9 Detected    | 691.9 Detected   | Wdr66         | 5.017403916 | 0.46337926 | 4.59428951 | 0.4243028 |
| A_51_P1428 | 6.5 Not Detect  | 64.4 Detected    | 3.7 Not Detect   | 32.6 Not Detect  | Cd59a         | 5.015384615 | 0.56923077 | 0.50621118 | 0.0574534 |
| A_51_P2844 | 3059 Detected   | 4185 Detected    | 17987.5 Detected | 15333.3 Detected | Gstm2         | 5.012520432 | 5.8801896  | 3.66387097 | 4.2980884 |
| A_55_P2007 | 216.7 Detected  | 533.5 Detected   | 468.7 Detected   | 1084.6 Detected  | Smarca2       | 5.005076142 | 2.16289802 | 2.03298969 | 0.878538  |
| A_55_P2007 | 67.2 Detected   | 29.1 Detected    | 44.5 Detected    | 336 Detected     | Prkce         | 5           | 0.66220238 | 11.5463918 | 1.5292096 |
| A_55_P2090 | 3.1 Not Detect  | 107.2 Detected   | 272.3 Detected   | 15.5 Not Detect  | Kcnmb4        | 5           | 87.8387097 | 0.14458955 | 2.5401119 |
| A_52_P3302 | 340.8 Detected  | 589.5 Detected   | 508 Detected     | 1701.2 Detected  | Inpp4b        | 4.991784038 | 1.49061033 | 2.88583545 | 0.8617472 |
| A_55_P2147 | 374.4 Detected  | 1331.2 Detected  | 534.5 Detected   | 1867.4 Detected  | Gm6116        | 4.987713675 | 1.42761752 | 1.40279447 | 0.4015174 |
| A_55_P2074 | 12.4 Not Detect | 160 Detected     | 19.4 Detected    | 61.8 Detected    | Tmprss11e     | 4.983870968 | 1.56451613 | 0.38625    | 0.12125   |
| A_51_P3106 | 11.4 Not Detect | 22.7 Detected    | 28.4 Detected    | 56.8 Detected    | Galr2         | 4.98245614  | 2.49122807 | 2.50220264 | 1.2511013 |
| A_52_P1067 | 151.1 Detected  | 299.8 Detected   | 517.5 Detected   | 752.7 Detected   | Rasgrf2       | 4.981469226 | 3.42488418 | 2.51067378 | 1.7261508 |
| A_51_P1128 | 4.9 Not Detect  | 12.1 Not Detect  | 16.5 Detected    | 24.4 Not Detect  | Cyp27a1       | 4.979591837 | 3.36734694 | 2.01652893 | 1.3636364 |
| A_52_P5386 | 41.7 Detected   | 35.2 Detected    | 256.1 Detected   | 207.6 Detected   | Fgf1          | 4.978417266 | 6.14148681 | 5.89772727 | 7.2755682 |
| A_55_P2373 | 45.4 Detected   | 16.6 Detected    | 16.4 Not Detect  | 226 Compromis    | B430319H21Rik | 4.977973568 | 0.36123348 | 13.6144578 | 0.9879518 |
| A_51_P3369 | 594.2 Detected  | 2902.1 Detected  | 1539.7 Detected  | 2955.4 Detected  | Cryl1         | 4.973746213 | 2.59121508 | 1.01836601 | 0.5305468 |
| A_55_P2011 | 22.4 Detected   | 8.1 Not Detect   | 9.9 Not Detect   | 111.3 Detected   | Gpr141        | 4.96875     | 0.44196429 | 13.7407407 | 1.2222222 |
| A_55_P2023 | 15.2 Not Detect | 90 Detected      | 64.1 Detected    | 75.5 Detected    | Tmprss11f     | 4.967105263 | 4.21710526 | 0.83888889 | 0.7122222 |
| A_55_P2117 | 12.1 Not Detect | 8.5 Not Detect   | 9.7 Not Detect   | 60.1 Detected    | Tnfrsf13c     | 4.966942149 | 0.80165289 | 7.07058824 | 1.1411765 |
| A_55_P2013 | 66.6 Detected   | 234 Detected     | 316 Detected     | 330.5 Detected   | Prss8         | 4.962462462 | 4.74474474 | 1.41239316 | 1.3504274 |
| A_55_P2134 | 1839.2 Detected | 2498.3 Detected  | 10365 Detected   | 9088.7 Detected  | Gstm2         | 4.941659417 | 5.63560244 | 3.63795381 | 4.1488212 |
| A_55_P2091 | 5264.7 Detected | 15403.8 Detected | 10490.9 Detected | 25981.4 Detected | Bnip3         | 4.935020039 | 1.99268714 | 1.6866877  | 0.6810592 |



|            |         |            |        |            |          |            |          |            |               |             |            |            |           |
|------------|---------|------------|--------|------------|----------|------------|----------|------------|---------------|-------------|------------|------------|-----------|
| A_66_P1268 | 51.9    | Detected   | 108.1  | Detected   | 94.4     | Detected   | 255.4    | Detected   | AA415398      | 4.921001927 | 1.81888247 | 2.3626272  | 0.8732655 |
| A_55_P2027 | 286.1   | Detected   | 211.8  | Detected   | 715.5    | Detected   | 1406.4   | Detected   | Gpr146        | 4.915763719 | 2.50087382 | 6.64022663 | 3.378187  |
| A_55_P1990 | 180.5   | Detected   | 516.1  | Detected   | 412.6    | Detected   | 887.1    | Detected   | Mks1          | 4.91468144  | 2.28587258 | 1.71885294 | 0.7994575 |
| A_51_P2460 | 653.5   | Detected   | 1119.5 | Detected   | 2937.1   | Detected   | 3211.7   | Detected   | Slamf9        | 4.914613619 | 4.49441469 | 2.86887003 | 2.623582  |
| A_55_P2048 | 352.7   | Detected   | 430.7  | Detected   | 351.5    | Detected   | 1731.6   | Detected   | Mirg          | 4.909554862 | 0.99659768 | 4.02043186 | 0.8161133 |
| A_55_P2021 | 22664.7 | Detected   | 100.7  | Detected   | 317271   | Detected   | 111158.9 | Detected   | Tff1          | 4.904494655 | 13.9984646 | 1103.86197 | 3150.6554 |
| A_52_P4932 | 20.6    | Detected   | 34.7   | Detected   | 22.4     | Detected   | 101      | Detected   | Adamts9       | 4.902912621 | 1.08737864 | 2.91066282 | 0.6455331 |
| A_55_P2112 | 21275.1 | Detected   | 106.9  | Detected   | 289013.5 | Detected   | 104307.9 | Detected   | Tff1          | 4.902815968 | 13.5845895 | 975.752105 | 2703.5875 |
| A_55_P2168 | 2.9     | Not Detect | 4.6    | Not Detect | 26.3     | Detected   | 14.2     | Not Detect | Fmo5          | 4.896551724 | 9.06896552 | 3.08695652 | 5.7173913 |
| A_55_P2112 | 13.2    | Not Detect | 20.1   | Detected   | 14.8     | Not Detect | 64.5     | Detected   | Tmbim7        | 4.886363636 | 1.12121212 | 3.20895522 | 0.7363184 |
| A_55_P1961 | 2051.7  | Detected   | 1192.3 | Detected   | 7990.6   | Detected   | 10021.1  | Detected   | Selenbp1      | 4.884291076 | 3.89462397 | 8.40484777 | 6.7018368 |
| A_55_P2101 | 36.7    | Detected   | 76.6   | Detected   | 107.4    | Detected   | 179.2    | Detected   | Aldh6a1       | 4.882833787 | 2.92643052 | 2.33942559 | 1.4020888 |
| A_52_P3677 | 954.3   | Detected   | 2051.9 | Detected   | 1907.6   | Detected   | 4653.1   | Detected   | Calml4        | 4.875930001 | 1.99895211 | 2.2677031  | 0.9296749 |
| A_55_P1988 | 165.4   | Detected   | 70     | Detected   | 23.9     | Detected   | 805.7    | Detected   | Ifi203        | 4.871221282 | 0.14449819 | 11.51      | 0.3414286 |
| A_55_P2114 | 27.3    | Detected   | 13.1   | Not Detect | 22       | Detected   | 132.7    | Detected   | Xpr1          | 4.860805861 | 0.80586081 | 10.129771  | 1.6793893 |
| A_55_P2030 | 45.9    | Detected   | 203.9  | Detected   | 34.3     | Detected   | 222.9    | Detected   | Gm5796        | 4.85620915  | 0.74727669 | 1.09318293 | 0.1682197 |
| A_55_P2026 | 1411.4  | Detected   | 1368   | Detected   | 3560.5   | Detected   | 6853.6   | Detected   | Ppp1r1b       | 4.855887771 | 2.52267252 | 5.00994152 | 2.6027047 |
| A_55_P1962 | 28.2    | Detected   | 24.7   | Detected   | 203.9    | Detected   | 136.9    | Detected   | Cyp2c67       | 4.854609929 | 7.23049645 | 5.54251012 | 8.2550607 |
| A_51_P1821 | 2.7     | Not Detect | 6.2    | Not Detect | 32.9     | Detected   | 13.1     | Not Detect | 5330417C22Rik | 4.851851852 | 12.1851852 | 2.11290323 | 5.3064516 |
| A_55_P2078 | 28.5    | Detected   | 18.2   | Detected   | 48.6     | Detected   | 138.1    | Detected   | Cib3          | 4.845614035 | 1.70526316 | 7.58791209 | 2.6703297 |
| A_55_P1973 | 1212.3  | Detected   | 6354.3 | Detected   | 2265.7   | Detected   | 5852.7   | Detected   | Krt79         | 4.827765405 | 1.86892683 | 0.92106133 | 0.3565617 |
| A_55_P2182 | 42.1    | Detected   | 36.4   | Detected   | 38.8     | Detected   | 202.9    | Detected   | Arid4a        | 4.819477435 | 0.9216152  | 5.57417582 | 1.0659341 |
| A_52_P4232 | 2.7     | Not Detect | 3      | Not Detect | 16.8     | Detected   | 13       | Not Detect | Nfe2l3        | 4.814814815 | 6.22222222 | 4.33333333 | 5.6       |
| A_51_P2043 | 5.9     | Not Detect | 53.4   | Detected   | 8.1      | Not Detect | 28.4     | Not Detect | Tmem63c       | 4.813559322 | 1.37288136 | 0.53183521 | 0.1516854 |
| A_51_P2720 | 11.6    | Not Detect | 30.9   | Detected   | 17.7     | Detected   | 55.6     | Detected   | 2010109I03Rik | 4.793103448 | 1.52586207 | 1.79935275 | 0.5728155 |
| A_52_P3023 | 22      | Detected   | 79.4   | Detected   | 54.7     | Detected   | 105.4    | Detected   | Cyp4v3        | 4.790909091 | 2.48636364 | 1.32745592 | 0.6889169 |
| A_55_P2078 | 20.4    | Detected   | 22.1   | Detected   | 26.5     | Detected   | 97.7     | Detected   | Mapk4         | 4.789215686 | 1.29901961 | 4.42081448 | 1.199095  |
| A_55_P2082 | 12.4    | Not Detect | 27.6   | Detected   | 37.1     | Detected   | 59.3     | Detected   | Krt12         | 4.782258065 | 2.99193548 | 2.14855072 | 1.3442029 |
| A_55_P2111 | 30.7    | Detected   | 31     | Detected   | 21.2     | Detected   | 146.7    | Detected   | Mecom         | 4.778501629 | 0.69055375 | 4.73225806 | 0.683871  |
| A_51_P1694 | 1234.4  | Detected   | 58.1   | Detected   | 4079.2   | Detected   | 5888.3   | Detected   | Mcpt1         | 4.770171743 | 3.30460143 | 101.347676 | 70.209983 |
| A_55_P2060 | 28.3    | Detected   | 127.9  | Detected   | 25.5     | Detected   | 134.9    | Detected   | Gm5797        | 4.766784452 | 0.90106007 | 1.05473026 | 0.1993745 |
| A_55_P2227 | 47      | Detected   | 190.5  | Detected   | 22.6     | Detected   | 223.9    | Detected   | Ptprd         | 4.763829787 | 0.48085106 | 1.17532808 | 0.1186352 |
| A_55_P2151 | 2429.5  | Detected   | 3320.4 | Detected   | 4013.3   | Detected   | 11546.1  | Detected   | Gngt2         | 4.752459354 | 1.65190368 | 3.47732201 | 1.2086797 |
| A_52_P2314 | 12.9    | Not Detect | 7.5    | Not Detect | 3.2      | Not Detect | 61.3     | Detected   | Cped1         | 4.751937984 | 0.24806202 | 8.17333333 | 0.4266667 |
| A_55_P2151 | 2.8     | Not Detect | 16.1   | Detected   | 7        | Not Detect | 13.3     | Not Detect | Jakmip2       | 4.75        | 2.5        | 0.82608696 | 0.4347826 |
| A_52_P5595 | 14.4    | Detected   | 21.9   | Detected   | 23.7     | Detected   | 68.4     | Detected   | Cercam        | 4.75        | 1.64583333 | 3.12328767 | 1.0821918 |
| A_55_P2165 | 8.9     | Not Detect | 21     | Detected   | 92       | Detected   | 42.2     | Not Detect | Akap17b       | 4.741573034 | 10.3370787 | 2.00952381 | 4.3809524 |
| A_55_P2241 | 416.7   | Detected   | 535.5  | Detected   | 1063     | Detected   | 1974.5   | Detected   | 9330133O14Rik | 4.738420926 | 2.55099592 | 3.68720822 | 1.9850607 |
| A_51_P3349 | 68.9    | Detected   | 256.9  | Detected   | 3324.9   | Detected   | 325.2    | Detected   | Aldh1a1       | 4.71988389  | 48.256894  | 1.2658622  | 12.94239  |
| A_55_P2134 | 37.7    | Detected   | 50.7   | Detected   | 67.6     | Detected   | 177.7    | Detected   | Cftr          | 4.713527851 | 1.79310345 | 3.50493097 | 1.3333333 |

|            |         |            |         |            |          |            |         |            |               |             |            |            |           |
|------------|---------|------------|---------|------------|----------|------------|---------|------------|---------------|-------------|------------|------------|-----------|
| A_51_P4434 | 743.4   | Detected   | 1547.3  | Detected   | 1669.2   | Detected   | 3496.5  | Detected   | Smoc1         | 4.703389831 | 2.24535916 | 2.25974278 | 1.0787824 |
| A_55_P1977 | 10319.6 | Detected   | 15193.8 | Detected   | 42901    | Detected   | 48501.8 | Detected   | Ugt2b34       | 4.699968991 | 4.15723478 | 3.19220998 | 2.8235859 |
| A_55_P2174 | 172     | Detected   | 253.3   | Detected   | 607.2    | Detected   | 806     | Detected   | Creb3l3       | 4.686046512 | 3.53023256 | 3.18199763 | 2.3971575 |
| A_51_P4906 | 66.5    | Detected   | 276.2   | Detected   | 460.3    | Detected   | 311.1   | Detected   | Trim68        | 4.678195489 | 6.92180451 | 1.12635771 | 1.666546  |
| A_51_P3727 | 76.9    | Detected   | 58.7    | Detected   | 77.1     | Detected   | 359.4   | Detected   | Il16          | 4.673602081 | 1.00260078 | 6.12265758 | 1.3134583 |
| A_55_P2165 | 73.6    | Detected   | 70.2    | Detected   | 40.6     | Detected   | 343.9   | Detected   | Gm7420        | 4.672554348 | 0.55163043 | 4.8988604  | 0.5783476 |
| A_52_P5189 | 102.7   | Detected   | 151.9   | Detected   | 438.8    | Detected   | 479.6   | Detected   | Itga1         | 4.669912366 | 4.27263875 | 3.15734036 | 2.8887426 |
| A_55_P1992 | 4.2     | Not Detect | 18.7    | Detected   | 3.3      | Not Detect | 19.6    | Not Detect | Gmpr          | 4.666666667 | 0.78571429 | 1.04812834 | 0.1764706 |
| A_55_P1995 | 59.2    | Detected   | 67.5    | Detected   | 79.5     | Detected   | 276.1   | Detected   | Rfx7          | 4.663851351 | 1.34290541 | 4.09037037 | 1.1777778 |
| A_51_P1176 | 45.9    | Detected   | 33.9    | Detected   | 35.2     | Detected   | 213.8   | Detected   | 5830468F06Rik | 4.65795207  | 0.76688453 | 6.30678466 | 1.0383481 |
| A_55_P2063 | 45644.6 | Detected   | 50656.3 | Detected   | 121775.8 | Detected   | 212356  | Detected   | Lgals4        | 4.652379471 | 2.66791252 | 4.19209457 | 2.4039616 |
| A_51_P4402 | 654     | Detected   | 634.1   | Detected   | 4883.2   | Detected   | 3040.1  | Detected   | Ggt6          | 4.648470948 | 7.46666667 | 4.7943542  | 7.7009935 |
| A_51_P4629 | 157.7   | Detected   | 384     | Detected   | 591.2    | Detected   | 732.9   | Detected   | Ehhadh        | 4.647431833 | 3.7488903  | 1.90859375 | 1.5395833 |
| A_55_P2013 | 6803.3  | Detected   | 10725.8 | Detected   | 29897.9  | Detected   | 31604   | Detected   | S100g         | 4.645392677 | 4.39461732 | 2.94654012 | 2.7874751 |
| A_55_P2105 | 2.8     | Not Detect | 3.4     | Not Detect | 20.9     | Detected   | 13      | Not Detect | Foxp1         | 4.642857143 | 7.46428571 | 3.82352941 | 6.1470588 |
| A_55_P1998 | 73.3    | Detected   | 190.3   | Detected   | 19.8     | Detected   | 339.9   | Detected   | Oas1a         | 4.637107776 | 0.27012278 | 1.78612717 | 0.1040462 |
| A_51_P2625 | 46.4    | Detected   | 239.4   | Detected   | 71.5     | Detected   | 215.1   | Detected   | Phf11a        | 4.635775862 | 1.54094828 | 0.89849624 | 0.2986633 |
| A_51_P4802 | 835.4   | Detected   | 1027.3  | Detected   | 4265     | Detected   | 3871.5  | Detected   | Elf3          | 4.634306919 | 5.10533876 | 3.76861676 | 4.1516597 |
| A_55_P2161 | 25      | Detected   | 64.7    | Detected   | 158.3    | Detected   | 115.6   | Detected   | Galr3         | 4.624       | 6.332      | 1.78670788 | 2.446677  |
| A_55_P1960 | 25.4    | Detected   | 45.1    | Detected   | 39.9     | Detected   | 117.4   | Detected   | Slc2a6        | 4.622047244 | 1.57086614 | 2.60310421 | 0.8847007 |
| A_55_P2105 | 195.2   | Detected   | 322.4   | Detected   | 799.3    | Detected   | 901.3   | Detected   | Pde2a         | 4.617315574 | 4.09477459 | 2.79559553 | 2.4792184 |
| A_55_P2179 | 4.9     | Not Detect | 3.6     | Not Detect | 33       | Detected   | 22.6    | Not Detect | Spp2          | 4.612244898 | 6.73469388 | 6.27777778 | 9.1666667 |
| A_51_P2262 | 4.9     | Not Detect | 262.1   | Detected   | 3.7      | Not Detect | 22.6    | Not Detect | Rgcc          | 4.612244898 | 0.75510204 | 0.08622663 | 0.0141167 |
| A_51_P2885 | 26.8    | Detected   | 112.1   | Detected   | 12.3     | Not Detect | 123.5   | Detected   | Wdr16         | 4.608208955 | 0.45895522 | 1.10169492 | 0.1097235 |
| A_55_P2014 | 927.8   | Detected   | 4092.1  | Detected   | 902.6    | Detected   | 4266.7  | Detected   | Kank1         | 4.598728174 | 0.97283897 | 1.04266758 | 0.2205713 |
| A_55_P1969 | 13.4    | Not Detect | 11.6    | Not Detect | 37.8     | Detected   | 61.6    | Detected   | 5430402E10Rik | 4.597014925 | 2.82089552 | 5.31034483 | 3.2586207 |
| A_55_P2102 | 367     | Detected   | 314.4   | Detected   | 619.5    | Detected   | 1681.6  | Detected   | Krtcap3       | 4.582016349 | 1.6880109  | 5.34860051 | 1.9704198 |
| A_55_P1970 | 2201.6  | Detected   | 3976.6  | Detected   | 7775.9   | Detected   | 10062.7 | Detected   | Hnf1a         | 4.570630451 | 3.53193132 | 2.5304783  | 1.9554142 |
| A_55_P1990 | 739.7   | Detected   | 1495.3  | Detected   | 574      | Detected   | 3374    | Detected   | Casp1         | 4.561308639 | 0.77599027 | 2.2564034  | 0.3838695 |
| A_51_P4223 | 18      | Detected   | 125.3   | Detected   | 43       | Detected   | 81.6    | Detected   | Odf3b         | 4.533333333 | 2.38888889 | 0.65123703 | 0.3431764 |
| A_52_P4683 | 68.4    | Detected   | 85.2    | Detected   | 145.7    | Detected   | 309.6   | Detected   | Bdh1          | 4.526315789 | 2.13011696 | 3.63380282 | 1.7100939 |
| A_55_P1997 | 189.7   | Detected   | 380.1   | Detected   | 515      | Detected   | 858.5   | Detected   | Slc7a4        | 4.525566684 | 2.71481286 | 2.25861615 | 1.3549066 |
| A_55_P1954 | 209.8   | Detected   | 214     | Detected   | 132.9    | Detected   | 948.8   | Detected   | Nrxn2         | 4.522402288 | 0.63346044 | 4.43364486 | 0.621028  |
| A_55_P1982 | 20.9    | Detected   | 34.2    | Detected   | 26.8     | Detected   | 94.5    | Detected   | Grip1         | 4.5215311   | 1.28229665 | 2.76315789 | 0.7836257 |
| A_55_P1964 | 114.4   | Detected   | 187.4   | Detected   | 142.5    | Detected   | 516.5   | Detected   | Gm3014        | 4.51486014  | 1.24562937 | 2.75613661 | 0.7604055 |
| A_66_P1052 | 51.3    | Detected   | 37.5    | Detected   | 313.5    | Detected   | 231.4   | Detected   | Hao1          | 4.510721248 | 6.11111111 | 6.17066667 | 8.36      |
| A_55_P2049 | 45.9    | Detected   | 167.6   | Detected   | 119.7    | Detected   | 206.7   | Detected   | Agrp          | 4.503267974 | 2.60784314 | 1.23329356 | 0.7142005 |
| A_51_P3052 | 11.8    | Not Detect | 8.1     | Not Detect | 8.1      | Not Detect | 53      | Detected   | Elavl3        | 4.491525424 | 0.68644068 | 6.54320988 | 1         |
| A_55_P2062 | 1767.1  | Detected   | 1363.4  | Detected   | 1114.6   | Detected   | 7935.1  | Detected   | Syne3         | 4.490464603 | 0.63075095 | 5.82008215 | 0.817515  |
| A_66_P1066 | 15.3    | Detected   | 9       | Not Detect | 3.5      | Not Detect | 68.7    | Detected   | Gna14         | 4.490196078 | 0.22875817 | 7.63333333 | 0.3888889 |

|            |                  |                  |                   |                   |               |             |            |            |           |
|------------|------------------|------------------|-------------------|-------------------|---------------|-------------|------------|------------|-----------|
| A_55_P2104 | 38.2 Detected    | 37.8 Detected    | 33.2 Detected     | 171.3 Detected    | Casc1         | 4.484293194 | 0.86910995 | 4.53174603 | 0.8783069 |
| A_55_P1957 | 20.7 Detected    | 128.6 Detected   | 114.1 Detected    | 92.8 Detected     | Guca2b        | 4.483091787 | 5.51207729 | 0.72161742 | 0.8872473 |
| A_52_P4981 | 278.5 Detected   | 338.3 Detected   | 201.4 Detected    | 1247.3 Detected   | Aldh1l2       | 4.478635548 | 0.72315978 | 3.68696423 | 0.5953296 |
| A_55_P1997 | 153.2 Detected   | 649.1 Detected   | 1057.4 Detected   | 684.7 Detected    | Zbtb32        | 4.469321149 | 6.90208877 | 1.05484517 | 1.6290248 |
| A_55_P1991 | 36.9 Detected    | 75 Detected      | 158.4 Detected    | 164.9 Detected    | Slc22a27      | 4.468834688 | 4.29268293 | 2.19866667 | 2.112     |
| A_55_P1986 | 3 Not Detect     | 3.1 Not Detect   | 27.2 Detected     | 13.4 Not Detect   | Obp2b         | 4.466666667 | 9.06666667 | 4.32258065 | 8.7741935 |
| A_52_P3830 | 4.3 Not Detect   | 8.5 Not Detect   | 18.5 Detected     | 19.2 Not Detect   | D830044D21Rik | 4.465116279 | 4.30232558 | 2.25882353 | 2.1764706 |
| A_55_P2169 | 82.2 Detected    | 89.7 Detected    | 164.2 Detected    | 366.9 Detected    | Ostm1         | 4.46350365  | 1.99756691 | 4.090301   | 1.8305463 |
| A_51_P2120 | 5886.9 Detected  | 8365.4 Detected  | 15297.6 Detected  | 26232.5 Detected  | Atp6v0e2      | 4.45608045  | 2.5985833  | 3.13583331 | 1.8286753 |
| A_55_P2044 | 111.9 Detected   | 49.2 Detected    | 333.8 Detected    | 498.6 Detected    | Cyp2b10       | 4.455764075 | 2.98302055 | 10.1341463 | 6.7845528 |
| A_52_P2312 | 18.9 Detected    | 36.1 Detected    | 15.3 Not Detect   | 84.2 Detected     | Cyp2j6        | 4.455026455 | 0.80952381 | 2.33240997 | 0.4238227 |
| A_55_P2032 | 19228.4 Detected | 38963.5 Detected | 40760 Detected    | 85552.8 Detected  | Pdlim1        | 4.449293753 | 2.11978116 | 2.1957165  | 1.0461073 |
| A_51_P2715 | 1251.3 Detected  | 1305.6 Detected  | 3639.8 Detected   | 5565.9 Detected   | Il1r1         | 4.448093982 | 2.90881483 | 4.26309743 | 2.787837  |
| A_51_P2796 | 14.4 Detected    | 166.2 Detected   | 10.2 Not Detect   | 64 Detected       | Col6a2        | 4.444444444 | 0.70833333 | 0.38507822 | 0.0613718 |
| A_55_P2085 | 22.7 Detected    | 130.5 Detected   | 46.4 Detected     | 100.8 Detected    | Ankrd34a      | 4.440528634 | 2.04405286 | 0.77241379 | 0.3555556 |
| A_51_P3456 | 40.1 Detected    | 147.7 Detected   | 3.5 Not Detect    | 178 Detected      | Pdgfra        | 4.438902743 | 0.0872818  | 1.20514557 | 0.0236967 |
| A_55_P1994 | 192.2 Detected   | 59.2 Detected    | 399.2 Detected    | 853 Detected      | Casc4         | 4.438085328 | 2.07700312 | 14.4087838 | 6.7432432 |
| A_55_P1980 | 37.9 Detected    | 33.6 Detected    | 25.8 Detected     | 167.9 Detected    | Kcnrg         | 4.430079156 | 0.68073879 | 4.99702381 | 0.7678571 |
| A_51_P2453 | 1033.2 Detected  | 4678 Detected    | 6404.3 Detected   | 4573.8 Detected   | Abcb1b        | 4.426829268 | 6.19850949 | 0.97772552 | 1.3690252 |
| A_55_P2031 | 10.6 Not Detect  | 33.9 Detected    | 32.4 Detected     | 46.9 Detected     | Gstm6         | 4.424528302 | 3.05660377 | 1.38348083 | 0.9557522 |
| A_51_P1708 | 13.9 Detected    | 33.5 Detected    | 18.1 Detected     | 61.5 Detected     | Asb5          | 4.424460432 | 1.30215827 | 1.8358209  | 0.5402985 |
| A_52_P3963 | 5659.3 Detected  | 9858.4 Detected  | 13285.5 Detected  | 25022.9 Detected  | Cdh17         | 4.421553902 | 2.34755182 | 2.53823136 | 1.3476325 |
| A_55_P2101 | 370.4 Detected   | 1764.2 Detected  | 1093.4 Detected   | 1636.9 Detected   | Gnat2         | 4.419276458 | 2.95194384 | 0.92784265 | 0.619771  |
| A_66_P1145 | 13.1 Not Detect  | 75 Detected      | 19 Detected       | 57.8 Detected     | A630095N17Rik | 4.41221374  | 1.45038168 | 0.77066667 | 0.2533333 |
| A_51_P3339 | 4.2 Not Detect   | 75.4 Detected    | 45.3 Detected     | 18.5 Not Detect   | Tspan1        | 4.404761905 | 10.7857143 | 0.24535809 | 0.6007958 |
| A_51_P4212 | 45.6 Detected    | 27 Detected      | 27.3 Detected     | 200.6 Detected    | Fv1           | 4.399122807 | 0.59868421 | 7.42962963 | 1.0111111 |
| A_55_P2083 | 5273.7 Detected  | 7100.6 Detected  | 18788.2 Detected  | 23171 Detected    | Vill          | 4.39368944  | 3.56262207 | 3.26324536 | 2.6460017 |
| A_55_P2070 | 112.6 Detected   | 144.3 Detected   | 169.3 Detected    | 494.6 Detected    | Cdh17         | 4.392539964 | 1.5035524  | 3.42758143 | 1.1732502 |
| A_51_P2980 | 13.4 Not Detect  | 14.3 Not Detect  | 127.4 Detected    | 58.8 Detected     | Ugt2a3        | 4.388059701 | 9.50746269 | 4.11188811 | 8.9090909 |
| A_55_P2129 | 3.4 Not Detect   | 25.1 Detected    | 4.9 Not Detect    | 14.9 Not Detect   | Rab40b        | 4.382352941 | 1.44117647 | 0.5936255  | 0.1952191 |
| A_55_P2130 | 226 Detected     | 288 Detected     | 519.3 Detected    | 988.8 Detected    | Slc52a3       | 4.375221239 | 2.29778761 | 3.43333333 | 1.803125  |
| A_51_P2817 | 27.5 Detected    | 39.8 Detected    | 125.2 Detected    | 120.3 Detected    | Igsf23        | 4.374545455 | 4.55272727 | 3.02261307 | 3.1457286 |
| A_51_P4971 | 45469.4 Detected | 51375.6 Detected | 119758.8 Detected | 198687.5 Detected | Lgals4        | 4.369696983 | 2.63383286 | 3.86735143 | 2.3310443 |
| A_52_P2207 | 446 Detected     | 2325.3 Detected  | 157.1 Detected    | 1945.9 Detected   | Tmem229b      | 4.363004484 | 0.35224215 | 0.83683826 | 0.0675612 |
| A_55_P2133 | 1160.6 Detected  | 1308.9 Detected  | 2736.4 Detected   | 5053.4 Detected   | Kirrel3       | 4.354127176 | 2.35774599 | 3.86079914 | 2.0906104 |
| A_55_P2050 | 207.3 Detected   | 295.3 Detected   | 82.6 Detected     | 902 Detected      | Nfkbid        | 4.351181862 | 0.39845634 | 3.05452083 | 0.2797155 |
| A_55_P2111 | 8944.4 Detected  | 13246.8 Detected | 38145.4 Detected  | 38900.7 Detected  | S100g         | 4.349168195 | 4.2647243  | 2.93661111 | 2.8795936 |
| A_55_P1981 | 9472 Detected    | 34972.2 Detected | 25635.4 Detected  | 41185.4 Detected  | Lamc2         | 4.348120777 | 2.70644003 | 1.17766111 | 0.7330222 |
| A_52_P2663 | 16.5 Detected    | 32.5 Detected    | 193.5 Detected    | 71.7 Detected     | Akap17b       | 4.345454545 | 11.7272727 | 2.20615385 | 5.9538462 |
| A_51_P4238 | 14.8 Not Detect  | 32.7 Detected    | 23.3 Detected     | 64.3 Detected     | Morn1         | 4.344594595 | 1.57432432 | 1.96636086 | 0.7125382 |

|            |         |            |         |            |         |            |          |            |               |             |            |            |           |
|------------|---------|------------|---------|------------|---------|------------|----------|------------|---------------|-------------|------------|------------|-----------|
| A_55_P2170 | 21676.3 | Detected   | 7151    | Detected   | 73027.4 | Detected   | 93742.6  | Detected   | Gsta2         | 4.324658729 | 3.36899748 | 13.1090197 | 10.212194 |
| A_51_P4376 | 20.6    | Detected   | 92.5    | Detected   | 33.7    | Detected   | 89       | Detected   | Ube2dn12      | 4.32038835  | 1.63592233 | 0.96216216 | 0.3643243 |
| A_52_P2393 | 39.8    | Detected   | 145.3   | Detected   | 90.6    | Detected   | 171.9    | Detected   | Syngn1        | 4.319095477 | 2.27638191 | 1.18306951 | 0.6235375 |
| A_55_P1966 | 196.9   | Detected   | 255.3   | Detected   | 1082.3  | Detected   | 850      | Detected   | Gstm2         | 4.316912138 | 5.49669883 | 3.32941637 | 4.2393263 |
| A_55_P2107 | 19.9    | Detected   | 20.8    | Detected   | 37      | Detected   | 85.8     | Detected   | Col20a1       | 4.311557789 | 1.85929648 | 4.125      | 1.7788462 |
| A_66_P1084 | 32485.9 | Detected   | 54982.2 | Detected   | 10472.1 | Detected   | 139920.9 | Detected   | 2610528A11Rik | 4.307127092 | 0.32235832 | 2.54483997 | 0.1904635 |
| A_66_P1180 | 173.8   | Detected   | 243.7   | Detected   | 248.8   | Detected   | 747.6    | Detected   | Tor3a         | 4.301495972 | 1.43153049 | 3.0677062  | 1.0209274 |
| A_55_P2029 | 3.2     | Not Detect | 11.8    | Not Detect | 32.3    | Detected   | 13.7     | Not Detect | Wnk2          | 4.28125     | 10.09375   | 1.16101695 | 2.7372881 |
| A_55_P2088 | 235.5   | Detected   | 306.6   | Detected   | 277.1   | Detected   | 1006.6   | Detected   | Myh10         | 4.274309979 | 1.17664544 | 3.28310502 | 0.9037834 |
| A_52_P6132 | 603.2   | Detected   | 1430.4  | Detected   | 2698.6  | Detected   | 2569.5   | Detected   | Icam1         | 4.259781167 | 4.47380637 | 1.79635067 | 1.8866051 |
| A_55_P2026 | 505.1   | Detected   | 1146.2  | Detected   | 1385.5  | Detected   | 2149.7   | Detected   | Tdrp          | 4.255988913 | 2.74302118 | 1.87550166 | 1.2087768 |
| A_55_P2033 | 194.3   | Detected   | 496.1   | Detected   | 156.3   | Detected   | 826.9    | Detected   | Sh3bgr        | 4.255790015 | 0.80442615 | 1.66680105 | 0.3150574 |
| A_55_P1952 | 159.6   | Detected   | 537.6   | Detected   | 282.5   | Detected   | 678.5    | Detected   | Pbp2          | 4.251253133 | 1.77005013 | 1.26209077 | 0.5254836 |
| A_51_P4816 | 985.7   | Detected   | 1581.9  | Detected   | 1906.6  | Detected   | 4185.9   | Detected   | Ero11         | 4.246626763 | 1.93425992 | 2.64612175 | 1.2052595 |
| A_51_P2877 | 15.2    | Detected   | 16.3    | Detected   | 13.4    | Not Detect | 64.5     | Detected   | Tex38         | 4.243421053 | 0.88157895 | 3.95705521 | 0.8220859 |
| A_52_P6523 | 447.4   | Detected   | 464.4   | Detected   | 2319.2  | Detected   | 1896.2   | Detected   | Zbtb7c        | 4.238265534 | 5.18372821 | 4.083118   | 4.9939707 |
| A_51_P1619 | 2799    | Detected   | 6003    | Detected   | 8829.4  | Detected   | 11859.7  | Detected   | E130012A19Rik | 4.2371204   | 3.15448374 | 1.97562885 | 1.4708313 |
| A_55_P2006 | 16.5    | Detected   | 36      | Detected   | 38.9    | Detected   | 69.9     | Detected   | Apol10b       | 4.236363636 | 2.35757576 | 1.94166667 | 1.0805556 |
| A_55_P1967 | 8.9     | Not Detect | 6.9     | Not Detect | 21.9    | Detected   | 37.7     | Not Detect | Tmem151a      | 4.235955056 | 2.46067416 | 5.46376812 | 3.173913  |
| A_51_P3890 | 3       | Not Detect | 36.1    | Detected   | 11.6    | Not Detect | 12.7     | Not Detect | Sgcd          | 4.233333333 | 3.86666667 | 0.35180055 | 0.3213296 |
| A_55_P2160 | 402.4   | Detected   | 553.2   | Detected   | 1942.3  | Detected   | 1701.1   | Detected   | Pls1          | 4.227385686 | 4.82678926 | 3.07501808 | 3.5110268 |
| A_51_P2909 | 2185    | Detected   | 1924.6  | Detected   | 9568.8  | Detected   | 9224.8   | Detected   | Syt12         | 4.22187643  | 4.3793135  | 4.79309986 | 4.9718383 |
| A_55_P2063 | 47169.2 | Detected   | 51124.3 | Detected   | 131230  | Detected   | 199037.7 | Detected   | Lgals4        | 4.219653927 | 2.78211206 | 3.89321125 | 2.5668811 |
| A_51_P2155 | 29.4    | Detected   | 55.6    | Detected   | 64.8    | Detected   | 124      | Detected   | BC021614      | 4.217687075 | 2.20408163 | 2.23021583 | 1.1654676 |
| A_55_P1970 | 53.2    | Detected   | 81.9    | Detected   | 62.7    | Detected   | 224      | Detected   | Alg14         | 4.210526316 | 1.17857143 | 2.73504274 | 0.7655678 |
| A_66_P1101 | 1049.5  | Detected   | 2670.2  | Detected   | 1781.7  | Detected   | 4414.7   | Detected   | Eppk1         | 4.206479276 | 1.69766556 | 1.65332185 | 0.6672534 |
| A_55_P1961 | 234     | Detected   | 211.9   | Detected   | 276.4   | Detected   | 984.1    | Detected   | Speer1-ps1    | 4.205555556 | 1.18119658 | 4.64417178 | 1.3043889 |
| A_51_P3395 | 5.9     | Not Detect | 32.5    | Detected   | 3.5     | Not Detect | 24.8     | Not Detect | Cdkn1c        | 4.203389831 | 0.59322034 | 0.76307692 | 0.1076923 |
| A_55_P2110 | 1574.6  | Detected   | 4138.9  | Detected   | 2660.6  | Detected   | 6617.5   | Detected   | Eppk1         | 4.202654642 | 1.68969897 | 1.59885477 | 0.6428278 |
| A_51_P4082 | 1515.3  | Detected   | 3394.1  | Detected   | 6492.7  | Detected   | 6367.6   | Detected   | Misp          | 4.202204184 | 4.28476209 | 1.87607908 | 1.9129372 |
| A_55_P1958 | 134.5   | Detected   | 491.5   | Detected   | 124     | Detected   | 563.9    | Detected   | LOC545005     | 4.192565056 | 0.92193309 | 1.14730417 | 0.2522889 |
| A_55_P2063 | 20.3    | Detected   | 45.9    | Detected   | 36.9    | Detected   | 85.1     | Detected   | Tomm7         | 4.192118227 | 1.81773399 | 1.8540305  | 0.8039216 |
| A_55_P2077 | 25.3    | Detected   | 30.4    | Detected   | 35.6    | Detected   | 106      | Detected   | Trmt61b       | 4.18972332  | 1.40711462 | 3.48684211 | 1.1710526 |
| A_51_P1548 | 136.5   | Detected   | 401.3   | Detected   | 45.5    | Detected   | 571.8    | Detected   | Oas1f         | 4.189010989 | 0.33333333 | 1.42486918 | 0.1133815 |
| A_51_P3572 | 23      | Detected   | 3.6     | Not Detect | 3.6     | Not Detect | 96.3     | Detected   | Zfp518b       | 4.186956522 | 0.15652174 | 26.75      | 1         |
| A_66_P1306 | 6.2     | Not Detect | 4.3     | Not Detect | 36.2    | Detected   | 25.9     | Not Detect | Onecut1       | 4.177419355 | 5.83870968 | 6.02325581 | 8.4186047 |
| A_52_P1513 | 162.4   | Detected   | 23.2    | Detected   | 174.3   | Detected   | 677.2    | Detected   | Fam211b       | 4.169950739 | 1.07327586 | 29.1896552 | 7.512931  |
| A_55_P2046 | 8.9     | Not Detect | 29.2    | Detected   | 18.8    | Detected   | 37.1     | Not Detect | Ccdc103       | 4.168539326 | 2.11235955 | 1.27054795 | 0.6438356 |
| A_51_P1720 | 6646.9  | Detected   | 2813.2  | Detected   | 15866.3 | Detected   | 27687.1  | Detected   | Gas6          | 4.165415457 | 2.38702252 | 9.84185269 | 5.6399474 |
| A_55_P2180 | 12.7    | Not Detect | 17.5    | Not Detect | 8.9     | Not Detect | 52.9     | Detected   | 4933413G19Rik | 4.165354331 | 0.7007874  | 3.02285714 | 0.5085714 |

|            |         |            |         |            |         |            |          |            |               |             |            |            |           |
|------------|---------|------------|---------|------------|---------|------------|----------|------------|---------------|-------------|------------|------------|-----------|
| A_55_P2027 | 728.3   | Detected   | 1367.2  | Detected   | 1806.1  | Detected   | 3030.1   | Detected   | Rph3al        | 4.160510779 | 2.47988466 | 2.21628145 | 1.3210211 |
| A_55_P2098 | 7.1     | Not Detect | 3.6     | Not Detect | 28.1    | Detected   | 29.5     | Not Detect | Adamtsl3      | 4.154929577 | 3.95774648 | 8.19444444 | 7.8055556 |
| A_52_P5426 | 17.4    | Detected   | 687     | Detected   | 3.8     | Not Detect | 72.2     | Detected   | Tmem56        | 4.149425287 | 0.2183908  | 0.10509461 | 0.0055313 |
| A_51_P4341 | 9951.8  | Detected   | 17313.6 | Detected   | 21898.6 | Detected   | 41244.8  | Detected   | Herpud1       | 4.144456279 | 2.20046625 | 2.38221976 | 1.2648207 |
| A_55_P1988 | 44.1    | Detected   | 174.5   | Detected   | 31.6    | Detected   | 182.7    | Detected   | Gm10406       | 4.142857143 | 0.71655329 | 1.0469914  | 0.1810888 |
| A_55_P1977 | 21699.8 | Detected   | 34178.5 | Detected   | 28372.9 | Detected   | 89833    | Detected   | Anxa11        | 4.13980774  | 1.30751896 | 2.62834823 | 0.8301388 |
| A_55_P2066 | 17.5    | Detected   | 12.7    | Not Detect | 9.6     | Not Detect | 72.4     | Detected   | Frmd7         | 4.137142857 | 0.54857143 | 5.7007874  | 0.7559055 |
| A_55_P2084 | 255.3   | Detected   | 410.1   | Detected   | 304.1   | Detected   | 1055.6   | Detected   | Anxa11        | 4.134743439 | 1.19114767 | 2.57400634 | 0.7415265 |
| A_51_P2619 | 419.4   | Detected   | 489.9   | Detected   | 143.4   | Detected   | 1733.2   | Detected   | Ccdc166       | 4.132570339 | 0.34191702 | 3.53786487 | 0.2927128 |
| A_52_P21   | 12.5    | Not Detect | 163.4   | Detected   | 3.7     | Not Detect | 51.5     | Not Detect | Ttc9          | 4.12        | 0.296      | 0.31517748 | 0.0226438 |
| A_51_P1667 | 104.2   | Detected   | 134.3   | Detected   | 48.7    | Detected   | 429.3    | Detected   | Kcni4         | 4.119961612 | 0.46737044 | 3.19657483 | 0.362621  |
| A_51_P2144 | 108.1   | Detected   | 234.4   | Detected   | 294.8   | Detected   | 445      | Detected   | Tdrp          | 4.116558742 | 2.72710453 | 1.89846416 | 1.2576792 |
| A_55_P2153 | 39.9    | Detected   | 67.5    | Detected   | 79.1    | Detected   | 164.2    | Detected   | G630090E17Rik | 4.115288221 | 1.98245614 | 2.43259259 | 1.1718519 |
| A_55_P2145 | 13661.7 | Detected   | 9889.8  | Detected   | 58206.4 | Detected   | 56214.6  | Detected   | Leprel4       | 4.114758778 | 4.26055323 | 5.68409877 | 5.8854982 |
| A_66_P1263 | 6.1     | Not Detect | 28.3    | Detected   | 6.3     | Not Detect | 25.1     | Not Detect | 9230102O04Rik | 4.114754098 | 1.03278689 | 0.8869258  | 0.2226148 |
| A_55_P1954 | 41.5    | Detected   | 138.7   | Detected   | 36.7    | Detected   | 170.7    | Detected   | Esrb          | 4.113253012 | 0.88433735 | 1.23071377 | 0.2645999 |
| A_51_P4158 | 753.9   | Detected   | 2464.2  | Detected   | 556     | Detected   | 3100.9   | Detected   | Tusc1         | 4.113144979 | 0.73749834 | 1.25838    | 0.225631  |
| A_55_P1984 | 14.4    | Not Detect | 12.6    | Not Detect | 15.4    | Not Detect | 59.2     | Detected   | Trim28        | 4.111111111 | 1.06944444 | 4.6984127  | 1.2222222 |
| A_51_P3741 | 2.7     | Not Detect | 4.2     | Not Detect | 17.1    | Detected   | 11.1     | Not Detect | Bcmo1         | 4.111111111 | 6.33333333 | 2.64285714 | 4.0714286 |
| A_55_P2249 | 15.3    | Detected   | 57.6    | Detected   | 28.3    | Detected   | 62.9     | Detected   | 6330531I01Rik | 4.111111111 | 1.8496732  | 1.09201389 | 0.4913194 |
| A_52_P2969 | 38.4    | Detected   | 57.8    | Detected   | 38.1    | Detected   | 157.8    | Detected   | Cnm1          | 4.109375    | 0.9921875  | 2.73010381 | 0.6591696 |
| A_55_P2180 | 367.1   | Detected   | 397.8   | Detected   | 144.3   | Detected   | 1506.1   | Detected   | Ccdc166       | 4.102696813 | 0.3930809  | 3.7860734  | 0.3627451 |
| A_51_P5038 | 23.9    | Detected   | 172.9   | Detected   | 3.8     | Not Detect | 98       | Detected   | Slitrk6       | 4.10041841  | 0.15899582 | 0.56680162 | 0.021978  |
| A_55_P2172 | 268.9   | Detected   | 132.6   | Detected   | 234.1   | Detected   | 1101.5   | Compromis  | Trim65        | 4.096318334 | 0.87058386 | 8.30693816 | 1.76546   |
| A_52_P6371 | 189.5   | Detected   | 266     | Detected   | 433.1   | Detected   | 775.9    | Detected   | Pyroxd2       | 4.094459103 | 2.28548813 | 2.91691729 | 1.6281955 |
| A_55_P2032 | 57726   | Detected   | 18055.5 | Detected   | 182797  | Detected   | 236250.9 | Detected   | Gm3776        | 4.092625507 | 3.16663202 | 13.0847055 | 10.124173 |
| A_55_P2137 | 2514.6  | Detected   | 2074.2  | Detected   | 2277.3  | Detected   | 10290    | Detected   | Kcnu1         | 4.092102124 | 0.90563111 | 4.9609488  | 1.0979173 |
| A_55_P2036 | 58.1    | Detected   | 75.4    | Detected   | 88      | Detected   | 237.7    | Detected   | Mycbpap       | 4.091222031 | 1.51462995 | 3.15251989 | 1.1671088 |
| A_51_P2921 | 578.3   | Detected   | 1027.4  | Detected   | 3527    | Detected   | 2364.5   | Detected   | Ica1          | 4.088708283 | 6.0989106  | 2.30144053 | 3.4329375 |
| A_55_P2007 | 2390    | Detected   | 16010.8 | Detected   | 2312.1  | Detected   | 9769.6   | Detected   | Cryab         | 4.087698745 | 0.96740586 | 0.61018812 | 0.1444088 |
| A_55_P1999 | 46.9    | Detected   | 74.4    | Detected   | 99.3    | Detected   | 191.7    | Detected   | Pram1         | 4.087420043 | 2.11727079 | 2.5766129  | 1.3346774 |
| A_51_P1363 | 414.9   | Detected   | 699.1   | Detected   | 935.6   | Detected   | 1694.9   | Detected   | Galm          | 4.085080742 | 2.25500121 | 2.4244028  | 1.3382921 |
| A_55_P2099 | 1241.9  | Detected   | 2111.7  | Detected   | 1283.6  | Detected   | 5072.7   | Detected   | Apobec1       | 4.084628392 | 1.03357758 | 2.40218781 | 0.6078515 |
| A_51_P4249 | 45.2    | Detected   | 268.4   | Detected   | 23.8    | Detected   | 184.5    | Detected   | Bcl6b         | 4.081858407 | 0.52654867 | 0.68740686 | 0.0886736 |
| A_55_P2112 | 85.5    | Detected   | 312.1   | Detected   | 89.1    | Detected   | 348.7    | Detected   | 4930564C03Rik | 4.078362573 | 1.04210526 | 1.11727011 | 0.2854854 |
| A_55_P2142 | 136.8   | Detected   | 374.3   | Detected   | 504.8   | Detected   | 557.4    | Detected   | Hist2h3c2     | 4.074561404 | 3.69005848 | 1.4891798  | 1.3486508 |
| A_55_P2157 | 2.7     | Not Detect | 16.8    | Detected   | 3.1     | Not Detect | 11       | Not Detect | Igsf10        | 4.074074074 | 1.14814815 | 0.6547619  | 0.1845238 |
| A_52_P3909 | 4.1     | Not Detect | 85.4    | Detected   | 4.3     | Not Detect | 16.7     | Not Detect | Chst3         | 4.073170732 | 1.04878049 | 0.19555035 | 0.0503513 |
| A_51_P2690 | 18677.3 | Detected   | 36625.7 | Detected   | 37532.6 | Detected   | 76004.6  | Detected   | Chchd10       | 4.06935692  | 2.00953029 | 2.07517126 | 1.0247613 |
| A_55_P1954 | 13      | Not Detect | 10.2    | Not Detect | 25.5    | Detected   | 52.9     | Not Detect | Hmgcs1        | 4.069230769 | 1.96153846 | 5.18627451 | 2.5       |

|            |                  |                  |                  |                  |               |             |            |            |           |
|------------|------------------|------------------|------------------|------------------|---------------|-------------|------------|------------|-----------|
| A_55_P1952 | 164.2 Detected   | 412.9 Detected   | 126.9 Detected   | 668 Detected     | Sh3bgr        | 4.068209501 | 0.772838   | 1.61782514 | 0.3073383 |
| A_55_P1983 | 834.4 Detected   | 427.6 Detected   | 5524.3 Detected  | 3393.4 Detected  | Scel          | 4.066874401 | 6.62068552 | 7.93592142 | 12.919317 |
| A_55_P2096 | 1357.5 Detected  | 1267.2 Detected  | 11763.8 Detected | 5510.8 Detected  | Gjb1          | 4.059521179 | 8.66578269 | 4.34880051 | 9.2833018 |
| A_55_P2109 | 259.3 Detected   | 699.5 Detected   | 443.6 Detected   | 1052.5 Detected  | Zfp941        | 4.059005013 | 1.71075974 | 1.50464618 | 0.6341673 |
| A_55_P2071 | 5.2 Not Detect   | 30.5 Detected    | 24.9 Detected    | 21.1 Not Detect  | Ppara         | 4.057692308 | 4.78846154 | 0.69180328 | 0.8163934 |
| A_55_P2417 | 14.8 Not Detect  | 23.7 Detected    | 15.3 Not Detect  | 60 Detected      | AW125324      | 4.054054054 | 1.03378378 | 2.53164557 | 0.6455696 |
| A_55_P1998 | 2099.9 Detected  | 1001 Detected    | 4596.2 Detected  | 8513.1 Detected  | Itgb4         | 4.054050193 | 2.18877089 | 8.5045954  | 4.5916084 |
| A_51_P3357 | 30.9 Detected    | 66.2 Detected    | 61.7 Detected    | 124.9 Detected   | Chn1          | 4.042071197 | 1.99676375 | 1.88670695 | 0.9320242 |
| A_55_P2031 | 753.1 Detected   | 1518.8 Detected  | 2591.8 Detected  | 3041.7 Detected  | Sspn          | 4.038905856 | 3.44150843 | 2.0026995  | 1.7064788 |
| A_52_P1879 | 44.3 Detected    | 148 Detected     | 38.5 Detected    | 178.2 Detected   | Slco1a6       | 4.022573363 | 0.86907449 | 1.20405405 | 0.2601351 |
| A_55_P2109 | 130.7 Detected   | 173.1 Detected   | 200.7 Detected   | 524.9 Detected   | Hist1h2bg     | 4.01606733  | 1.53557766 | 3.03235124 | 1.1594454 |
| A_66_P1001 | 30.6 Detected    | 78.8 Detected    | 92 Detected      | 122.8 Detected   | Serpini1      | 4.013071895 | 3.00653595 | 1.55837563 | 1.1675127 |
| A_51_P4191 | 91.8 Detected    | 91.6 Detected    | 108.1 Detected   | 368.3 Detected   | Ngly1         | 4.011982571 | 1.17755991 | 4.02074236 | 1.180131  |
| A_52_P5323 | 34.2 Detected    | 157.4 Detected   | 205.8 Detected   | 136.9 Detected   | Slc25a43      | 4.002923977 | 6.01754386 | 0.86975858 | 1.3074968 |
| A_52_P6627 | 13473.7 Detected | 10206.7 Detected | 54951.4 Detected | 53896.1 Detected | Anxa13        | 4.000096484 | 4.07841944 | 5.28046283 | 5.3838557 |
| A_66_P1007 | 15.9 Detected    | 18.3 Not Detect  | 30.3 Detected    | 63.6 Detected    | 1810019N24Rik | 4           | 1.90566038 | 3.47540984 | 1.6557377 |
| A_55_P1993 | 20.3 Detected    | 54.7 Detected    | 8.7 Not Detect   | 81.2 Detected    | LOC101055889  | 4           | 0.42857143 | 1.48446069 | 0.1590494 |
| A_55_P1962 | 2.7 Not Detect   | 19.8 Detected    | 4.4 Not Detect   | 10.8 Not Detect  | Gpr179        | 4           | 1.62962963 | 0.54545455 | 0.2222222 |
| A_51_P2466 | 488.7 Detected   | 879.7 Detected   | 575.7 Detected   | 1953.6 Detected  | Rec8          | 3.997544506 | 1.17802333 | 2.22075708 | 0.6544276 |
| A_55_P2154 | 225.5 Detected   | 165.3 Detected   | 342.9 Detected   | 901.2 Detected   | Car15         | 3.996452328 | 1.52062084 | 5.45190563 | 2.0744102 |
| A_55_P2213 | 206.9 Detected   | 122.5 Detected   | 135.5 Detected   | 825.7 Detected   | A030001D20Rik | 3.99081682  | 0.65490575 | 6.74040816 | 1.1061224 |
| A_51_P3365 | 105.8 Detected   | 250 Detected     | 1474 Detected    | 422.1 Detected   | Kcne3         | 3.989603025 | 13.9319471 | 1.6884     | 5.896     |
| A_52_P5089 | 33.8 Detected    | 40 Detected      | 93.2 Detected    | 134.7 Detected   | Fmo1          | 3.985207101 | 2.75739645 | 3.3675     | 2.33      |
| A_55_P2064 | 125.3 Detected   | 248.4 Detected   | 734 Detected     | 499.1 Detected   | Ica1          | 3.983240223 | 5.85794094 | 2.00925926 | 2.9549114 |
| A_55_P2052 | 17.8 Detected    | 9.7 Not Detect   | 18.2 Detected    | 70.9 Detected    | Ushbp1        | 3.983146067 | 1.02247191 | 7.30927835 | 1.8762887 |
| A_55_P1999 | 23.2 Detected    | 26 Detected      | 54.9 Detected    | 92.3 Detected    | Tenm1         | 3.978448276 | 2.36637931 | 3.55       | 2.1115385 |
| A_55_P2053 | 22.7 Detected    | 50.2 Detected    | 73.2 Detected    | 90.3 Detected    | Rundc3b       | 3.977973568 | 3.2246696  | 1.79880478 | 1.4581673 |
| A_51_P2960 | 885.7 Detected   | 766.4 Detected   | 1388.2 Detected  | 3522.4 Detected  | Nrbp2         | 3.97696737  | 1.56734786 | 4.5960334  | 1.8113257 |
| A_52_P4813 | 7.5 Not Detect   | 16.4 Detected    | 15.6 Detected    | 29.8 Not Detect  | Wdr93         | 3.973333333 | 2.08       | 1.81707317 | 0.9512195 |
| A_55_P2061 | 121.1 Detected   | 134.6 Detected   | 281.2 Detected   | 480.4 Detected   | Fam83e        | 3.966969447 | 2.32204789 | 3.56909361 | 2.089153  |
| A_55_P2190 | 154.6 Detected   | 580 Detected     | 193.5 Detected   | 613 Detected     | Cdsn          | 3.965071151 | 1.25161708 | 1.05689655 | 0.3336207 |
| A_51_P1984 | 15427.7 Detected | 51271.4 Detected | 40217.7 Detected | 61152.2 Detected | H2-K1         | 3.963792399 | 2.60685002 | 1.19271563 | 0.7844081 |
| A_55_P2045 | 43.9 Detected    | 70.7 Detected    | 178.1 Detected   | 174 Detected     | 2900008C10Rik | 3.963553531 | 4.05694761 | 2.46110325 | 2.5190948 |
| A_55_P2073 | 5.2 Not Detect   | 11.5 Not Detect  | 44.1 Detected    | 20.6 Not Detect  | Epb4.114b     | 3.961538462 | 8.48076923 | 1.79130435 | 3.8347826 |
| A_55_P2039 | 21.9 Detected    | 32 Detected      | 115.5 Detected   | 86.7 Detected    | Dhdh          | 3.95890411  | 5.2739726  | 2.709375   | 3.609375  |
| A_51_P3062 | 214.6 Detected   | 651.6 Detected   | 201.7 Detected   | 848.6 Detected   | Xkr5          | 3.954333644 | 0.93988816 | 1.30233272 | 0.3095457 |
| A_55_P2197 | 1076 Detected    | 1378.4 Detected  | 1743.3 Detected  | 4252.5 Detected  | Srgap1        | 3.952137546 | 1.62016729 | 3.08509867 | 1.2647272 |
| A_52_P2816 | 91.3 Detected    | 129.4 Detected   | 77.5 Detected    | 360.6 Detected   | Klf13         | 3.949616648 | 0.84884995 | 2.78670788 | 0.5989181 |
| A_52_P8869 | 2085 Detected    | 3217.4 Detected  | 4189.5 Detected  | 8229.3 Detected  | Dgka          | 3.946906475 | 2.00935252 | 2.55774849 | 1.3021384 |
| A_55_P1999 | 6884.9 Detected  | 12237.2 Detected | 10195.7 Detected | 27171.8 Detected | Pip5k1a       | 3.946578745 | 1.48087844 | 2.22042624 | 0.8331726 |

|            |                  |                  |                  |                   |               |             |            |            |           |
|------------|------------------|------------------|------------------|-------------------|---------------|-------------|------------|------------|-----------|
| A_55_P1970 | 891.5 Detected   | 174.1 Detected   | 3419.6 Detected  | 3517.6 Detected   | Arhgap44      | 3.945709478 | 3.83578239 | 20.2044802 | 19.641585 |
| A_55_P2105 | 38.5 Detected    | 106.6 Detected   | 58.5 Detected    | 151.9 Detected    | Tmed5         | 3.945454545 | 1.51948052 | 1.4249531  | 0.5487805 |
| A_51_P4403 | 69.7 Detected    | 80.5 Detected    | 143.9 Detected   | 274.6 Detected    | Efhc1         | 3.93974175  | 2.06456241 | 3.41118012 | 1.7875776 |
| A_52_P1018 | 7.9 Not Detect   | 48.9 Detected    | 25.2 Detected    | 31.1 Not Detect   | Mmaa          | 3.936708861 | 3.18987342 | 0.63599182 | 0.5153374 |
| A_55_P1999 | 28.4 Detected    | 32.3 Detected    | 24.9 Detected    | 111.8 Detected    | Defa1         | 3.936619718 | 0.87676056 | 3.46130031 | 0.7708978 |
| A_51_P2499 | 3 Not Detect     | 36.2 Detected    | 3.5 Not Detect   | 11.8 Not Detect   | Tceal1        | 3.933333333 | 1.16666667 | 0.32596685 | 0.0966851 |
| A_55_P1990 | 978.5 Detected   | 2514.7 Detected  | 2495.7 Detected  | 3846.4 Detected   | Stat5a        | 3.930914665 | 2.55053654 | 1.52956615 | 0.9924444 |
| A_51_P5087 | 168 Detected     | 174.3 Detected   | 167.5 Detected   | 659.7 Detected    | Mmp17         | 3.926785714 | 0.99702381 | 3.7848537  | 0.9609868 |
| A_55_P2090 | 189.6 Detected   | 381.8 Detected   | 91.9 Detected    | 744.5 Detected    | Mtus1         | 3.926687764 | 0.48470464 | 1.94997381 | 0.2407019 |
| A_55_P2175 | 2342.5 Detected  | 1582.8 Detected  | 10231.7 Detected | 9195.5 Detected   | Leprel4       | 3.925506937 | 4.36785486 | 5.80964114 | 6.4643038 |
| A_55_P2098 | 6.4 Not Detect   | 24 Detected      | 6.4 Not Detect   | 25.1 Not Detect   | Arhgef9       | 3.921875    | 1          | 1.04583333 | 0.2666667 |
| A_51_P3384 | 591.9 Detected   | 833.9 Detected   | 1712.3 Detected  | 2321.1 Detected   | Aldh6a1       | 3.921439432 | 2.89288731 | 2.78342727 | 2.0533637 |
| A_55_P2305 | 24.1 Detected    | 72.3 Detected    | 36.6 Detected    | 94.5 Detected     | Ush1c         | 3.921161826 | 1.5186722  | 1.30705394 | 0.5062241 |
| A_52_P4680 | 22.7 Detected    | 41.2 Detected    | 9.4 Not Detect   | 89 Detected       | Tchh          | 3.920704846 | 0.41409692 | 2.16019417 | 0.2281553 |
| A_51_P3110 | 3532.1 Detected  | 2021.1 Detected  | 3754.2 Detected  | 13839.4 Detected  | Adamts15      | 3.918178987 | 1.06288044 | 6.8474593  | 1.8575033 |
| A_51_P4978 | 193.7 Detected   | 744.5 Detected   | 211.4 Detected   | 758.9 Detected    | Creb3l4       | 3.9179143   | 1.09137842 | 1.01934184 | 0.283949  |
| A_55_P1979 | 38.8 Detected    | 125.5 Detected   | 50.1 Detected    | 152 Detected      | Ikzf4         | 3.917525773 | 1.29123711 | 1.21115538 | 0.3992032 |
| A_66_P1093 | 2471.4 Detected  | 2868.4 Detected  | 3965.3 Detected  | 9675 Detected     | Rpia          | 3.914785142 | 1.6044752  | 3.37296054 | 1.3824083 |
| A_55_P1992 | 2261 Detected    | 4853.2 Detected  | 10158.2 Detected | 8844 Detected     | Msi2          | 3.911543565 | 4.4927908  | 1.82230281 | 2.0930932 |
| A_55_P1971 | 373.8 Detected   | 474.5 Detected   | 106.9 Detected   | 1461 Detected     | Muc13         | 3.908507223 | 0.28598181 | 3.07903056 | 0.2252898 |
| A_55_P2020 | 88.1 Detected    | 126 Detected     | 159.5 Detected   | 344 Detected      | Orai3         | 3.904653802 | 1.81044268 | 2.73015873 | 1.265873  |
| A_51_P1451 | 1549 Detected    | 73.1 Detected    | 4498.2 Detected  | 6044.7 Detected   | Mcpt4         | 3.90232408  | 2.90393802 | 82.6908345 | 61.534884 |
| A_51_P1965 | 807.7 Detected   | 1261.4 Detected  | 1984.7 Detected  | 3151.4 Detected   | Bscl2         | 3.901696174 | 2.45722422 | 2.49833518 | 1.5734105 |
| A_55_P2076 | 359.3 Detected   | 1043.1 Detected  | 438.4 Detected   | 1401.8 Detected   | Nr5a1         | 3.90147509  | 1.22015029 | 1.34387882 | 0.4202857 |
| A_55_P2043 | 4.5 Not Detect   | 84.3 Detected    | 3 Not Detect     | 17.5 Not Detect   | Rpe65         | 3.888888889 | 0.66666667 | 0.20759193 | 0.0355872 |
| A_55_P2028 | 31.2 Detected    | 94.7 Detected    | 387.8 Detected   | 121.3 Detected    | Tspan2        | 3.887820513 | 12.4294872 | 1.28088701 | 4.095037  |
| A_52_P5375 | 5844 Detected    | 8487.2 Detected  | 22093 Detected   | 22710.5 Detected  | Smpd3         | 3.886122519 | 3.78045859 | 2.67585305 | 2.6030964 |
| A_51_P2965 | 15.2 Detected    | 18.2 Detected    | 13 Not Detect    | 59 Detected       | Cers4         | 3.881578947 | 0.85526316 | 3.24175824 | 0.7142857 |
| A_51_P3710 | 35928.5 Detected | 54395.5 Detected | 78403.3 Detected | 139310.1 Detected | Tm4sf4        | 3.877425999 | 2.18220354 | 2.56105928 | 1.4413564 |
| A_51_P1376 | 738.3 Detected   | 935.2 Detected   | 979.9 Detected   | 2862.5 Detected   | Card14        | 3.87715021  | 1.32723825 | 3.0608426  | 1.0477973 |
| A_52_P4869 | 48.8 Detected    | 37.9 Detected    | 241.2 Detected   | 189.1 Detected    | Spata20       | 3.875       | 4.94262295 | 4.98944591 | 6.3641161 |
| A_52_P2333 | 111 Detected     | 311.4 Detected   | 178.3 Detected   | 429.7 Detected    | Trim15        | 3.871171171 | 1.60630631 | 1.37989724 | 0.5725755 |
| A_51_P2850 | 3 Not Detect     | 28.7 Detected    | 12.9 Not Detect  | 11.6 Not Detect   | Cd160         | 3.866666667 | 4.3        | 0.40418118 | 0.4494774 |
| A_51_P4408 | 4.4 Not Detect   | 17 Detected      | 3.4 Not Detect   | 17 Not Detect     | Fam110b       | 3.863636364 | 0.77272727 | 1          | 0.2       |
| A_51_P2346 | 7313.5 Detected  | 13392.9 Detected | 16755.4 Detected | 28228.9 Detected  | Neat1         | 3.859834553 | 2.29102345 | 2.10775112 | 1.2510659 |
| A_55_P2050 | 392.2 Detected   | 674.2 Detected   | 762 Detected     | 1513.2 Detected   | Sh3d19        | 3.858235594 | 1.94288628 | 2.24443785 | 1.1302284 |
| A_52_P6334 | 122.5 Detected   | 206.3 Detected   | 326.6 Detected   | 472.2 Detected    | Gm129         | 3.854693878 | 2.66612245 | 2.28889966 | 1.5831314 |
| A_55_P2008 | 263.9 Detected   | 383 Detected     | 232.5 Detected   | 1017.1 Detected   | Il3ra         | 3.854111406 | 0.88101554 | 2.65561358 | 0.6070496 |
| A_55_P2165 | 32.2 Detected    | 20.9 Detected    | 20.5 Detected    | 124.1 Detected    | Cblb          | 3.854037267 | 0.63664596 | 5.93779904 | 0.9808612 |
| A_55_P2117 | 6.5 Not Detect   | 11.3 Not Detect  | 19.1 Detected    | 25 Not Detect     | 9530057J20Rik | 3.846153846 | 2.93846154 | 2.21238938 | 1.6902655 |

|            |                  |                  |                  |                  |               |             |            |            |           |
|------------|------------------|------------------|------------------|------------------|---------------|-------------|------------|------------|-----------|
| A_55_P2054 | 159.2 Detected   | 121 Detected     | 132.7 Detected   | 612.3 Detected   | Crebbp        | 3.846105528 | 0.83354271 | 5.06033058 | 1.0966942 |
| A_51_P1621 | 647.5 Detected   | 908.4 Detected   | 899.2 Detected   | 2490.2 Detected  | Mblac1        | 3.845868726 | 1.38872587 | 2.74130339 | 0.9898723 |
| A_55_P2002 | 115.4 Detected   | 126.7 Detected   | 127.3 Detected   | 443.7 Detected   | Pip5k1l       | 3.844887348 | 1.10311958 | 3.50197316 | 1.0047356 |
| A_55_P1966 | 7 Not Detect     | 20.1 Detected    | 16 Not Detect    | 26.9 Not Detect  | Cyp2e1        | 3.842857143 | 2.28571429 | 1.33830846 | 0.7960199 |
| A_55_P1984 | 50.7 Detected    | 145.4 Detected   | 115.6 Detected   | 194.8 Detected   | Casp4         | 3.842209073 | 2.2800789  | 1.33975241 | 0.7950481 |
| A_52_P3024 | 1019.7 Detected  | 1030.2 Detected  | 4131.3 Detected  | 3914.1 Detected  | Fah           | 3.838481906 | 4.05148573 | 3.79935935 | 4.0101922 |
| A_51_P4907 | 472.9 Detected   | 396.9 Detected   | 855.8 Detected   | 1815.2 Detected  | Mxd1          | 3.838443646 | 1.80968492 | 4.57344419 | 2.1562106 |
| A_55_P1964 | 14825.1 Detected | 99435.2 Detected | 12580.4 Detected | 56848.5 Detected | Cryab         | 3.834611571 | 0.84858787 | 0.57171404 | 0.1265186 |
| A_55_P2116 | 122.2 Detected   | 268.5 Detected   | 209.9 Detected   | 468.4 Detected   | Ccdc106       | 3.833060556 | 1.71767594 | 1.74450652 | 0.7817505 |
| A_51_P3788 | 2755.2 Detected  | 3966.8 Detected  | 2418.1 Detected  | 10539.5 Detected | Pfkip         | 3.825312137 | 0.87764954 | 2.6569275  | 0.6095846 |
| A_51_P3347 | 313.6 Detected   | 459.7 Detected   | 598.1 Detected   | 1197.7 Detected  | Nudt16        | 3.819196429 | 1.90720663 | 2.60539482 | 1.3010659 |
| A_65_P0850 | 4.4 Not Detect   | 14.1 Not Detect  | 39 Detected      | 16.8 Not Detect  | Adam23        | 3.818181818 | 8.86363636 | 1.19148936 | 2.7659574 |
| A_66_P1372 | 11.2 Not Detect  | 12.7 Not Detect  | 3.9 Not Detect   | 42.7 Detected    | 9130409J20Rik | 3.8125      | 0.34821429 | 3.36220472 | 0.3070866 |
| A_51_P2794 | 1079.7 Detected  | 4623.8 Detected  | 2518.8 Detected  | 4110.9 Detected  | Mfsd2a        | 3.807446513 | 2.33287024 | 0.88907392 | 0.5447467 |
| A_55_P2183 | 199.6 Detected   | 554.1 Detected   | 208.9 Detected   | 759.9 Detected   | Gli1          | 3.807114228 | 1.04659319 | 1.3714131  | 0.3770078 |
| A_52_P3031 | 22.2 Detected    | 31 Detected      | 23.9 Detected    | 84.4 Detected    | Ccr9          | 3.801801802 | 1.07657658 | 2.72258065 | 0.7709677 |
| A_51_P2587 | 31.5 Detected    | 26.4 Detected    | 380.5 Detected   | 119.7 Detected   | Paqr5         | 3.8         | 12.0793651 | 4.53409091 | 14.412879 |
| A_55_P2024 | 149.5 Detected   | 165.6 Detected   | 470.5 Detected   | 567.8 Detected   | Myo6          | 3.797993311 | 3.14715719 | 3.42874396 | 2.8411836 |
| A_66_P1258 | 15.9 Detected    | 3.6 Not Detect   | 51.8 Detected    | 60.3 Detected    | Hrh1          | 3.79245283  | 3.25786164 | 16.75      | 14.388889 |
| A_55_P1979 | 591.4 Detected   | 2512.4 Detected  | 1190.1 Detected  | 2241.8 Detected  | 1810062G17Rik | 3.790666216 | 2.01234359 | 0.89229422 | 0.4736905 |
| A_52_P4951 | 164.8 Detected   | 246 Detected     | 355.4 Detected   | 623.6 Detected   | Heca          | 3.783980583 | 2.1565534  | 2.53495935 | 1.4447154 |
| A_55_P1990 | 55.4 Detected    | 148.3 Detected   | 194.6 Detected   | 209.6 Detected   | Zfp13         | 3.783393502 | 3.51263538 | 1.41335131 | 1.312205  |
| A_55_P1955 | 8 Not Detect     | 47.4 Detected    | 26.4 Detected    | 30.2 Not Detect  | Ptpn5         | 3.775       | 3.3        | 0.6371308  | 0.556962  |
| A_51_P3120 | 15.2 Detected    | 17.5 Detected    | 40.4 Detected    | 57.3 Detected    | Cd300e        | 3.769736842 | 2.65789474 | 3.27428571 | 2.3085714 |
| A_55_P2128 | 5139.7 Detected  | 15936.1 Detected | 7725.1 Detected  | 19334.3 Detected | Pfn2          | 3.761756523 | 1.50302547 | 1.21323912 | 0.4847547 |
| A_51_P4559 | 1588.4 Detected  | 2216.6 Detected  | 2913.4 Detected  | 5956.9 Detected  | Pold4         | 3.750251826 | 1.83417275 | 2.68740413 | 1.3143553 |
| A_55_P2002 | 2246.1 Detected  | 2537.7 Detected  | 4276 Detected    | 8419.7 Detected  | Coro2a        | 3.748586439 | 1.90374427 | 3.31784687 | 1.6849903 |
| A_66_P1405 | 14 Detected      | 55.3 Detected    | 20.5 Detected    | 52.3 Detected    | Lhpp          | 3.735714286 | 1.46428571 | 0.94575045 | 0.3707052 |
| A_51_P2435 | 114.8 Detected   | 5402 Detected    | 113.4 Detected   | 428.1 Detected   | Macc1         | 3.729094077 | 0.98780488 | 0.07924843 | 0.0209922 |
| A_55_P1965 | 3986.7 Detected  | 3113.1 Detected  | 4834.1 Detected  | 14866 Detected   | Sh3tc1        | 3.728898588 | 1.21255675 | 4.77530436 | 1.5528252 |
| A_55_P2140 | 19.5 Detected    | 17.3 Detected    | 30.9 Detected    | 72.7 Detected    | Gm9869        | 3.728205128 | 1.58461538 | 4.20231214 | 1.7861272 |
| A_55_P2128 | 951 Detected     | 2029.4 Detected  | 2462.7 Detected  | 3543.1 Detected  | Bcl2l13       | 3.725657203 | 2.58958991 | 1.74588548 | 1.2135114 |
| A_55_P2026 | 100.7 Detected   | 109.1 Detected   | 6.7 Not Detect   | 374.4 Detected   | Pou6f1        | 3.717974181 | 0.06653426 | 3.43171402 | 0.0614115 |
| A_55_P2063 | 1031.1 Detected  | 1280.3 Detected  | 1084.5 Detected  | 3832.5 Detected  | Inadl         | 3.716904277 | 1.05178935 | 2.99343904 | 0.8470671 |
| A_55_P2078 | 30.4 Detected    | 40.3 Detected    | 28.9 Detected    | 112.9 Detected   | Otop1         | 3.713815789 | 0.95065789 | 2.80148883 | 0.7171216 |
| A_55_P2041 | 3.1 Not Detect   | 5.3 Not Detect   | 21 Detected      | 11.5 Not Detect  | 1700008O03Rik | 3.709677419 | 6.77419355 | 2.16981132 | 3.9622642 |
| A_51_P3800 | 1267.9 Detected  | 3248.3 Detected  | 6613.5 Detected  | 4690.4 Detected  | Galnt3        | 3.699345374 | 5.21610537 | 1.4439553  | 2.0359881 |
| A_51_P3614 | 26.6 Detected    | 3.8 Not Detect   | 3.8 Not Detect   | 98.4 Detected    | Scara5        | 3.69924812  | 0.14285714 | 25.8947368 | 1         |
| A_55_P2149 | 521.2 Detected   | 1226.7 Detected  | 421.4 Detected   | 1927.8 Detected  | 6430548M08Rik | 3.698772064 | 0.8085188  | 1.57153338 | 0.3435233 |
| A_55_P2064 | 14.4 Not Detect  | 139.5 Detected   | 14.9 Not Detect  | 53.2 Detected    | Lama3         | 3.694444444 | 1.03472222 | 0.38136201 | 0.10681   |



|            |         |            |         |            |          |            |          |            |               |             |            |            |           |
|------------|---------|------------|---------|------------|----------|------------|----------|------------|---------------|-------------|------------|------------|-----------|
| A_52_P4874 | 31.3    | Detected   | 377.8   | Detected   | 41.3     | Detected   | 115.5    | Detected   | Nags          | 3.690095847 | 1.31948882 | 0.30571731 | 0.1093171 |
| A_55_P2108 | 112.6   | Detected   | 188.9   | Detected   | 1307.7   | Detected   | 415.2    | Detected   | Kcne3         | 3.687388988 | 11.6136767 | 2.19798835 | 6.9227104 |
| A_66_P1039 | 33.3    | Detected   | 8.1     | Not Detect | 32.8     | Detected   | 122.4    | Detected   | Gm14318       | 3.675675676 | 0.98498498 | 15.1111111 | 4.0493827 |
| A_55_P2010 | 9.4     | Not Detect | 17.3    | Detected   | 8.9      | Not Detect | 34.5     | Not Detect | 1700029M03Rik | 3.670212766 | 0.94680851 | 1.99421965 | 0.5144509 |
| A_55_P2095 | 230.1   | Detected   | 1681.9  | Detected   | 878.7    | Detected   | 843.9    | Detected   | Dusp22        | 3.667535854 | 3.81877445 | 0.50175397 | 0.5224449 |
| A_55_P2045 | 178.3   | Detected   | 103.2   | Detected   | 131.6    | Detected   | 652.7    | Compromis  | Zfp944        | 3.66068424  | 0.73808188 | 6.3246124  | 1.2751938 |
| A_66_P1107 | 32.9    | Detected   | 40.9    | Detected   | 20.7     | Detected   | 120.2    | Detected   | Cabyr         | 3.653495441 | 0.62917933 | 2.93887531 | 0.5061125 |
| A_55_P2271 | 14.1    | Detected   | 18.8    | Detected   | 3.3      | Not Detect | 51.5     | Detected   | 1700022F17Rik | 3.65248227  | 0.23404255 | 2.7393617  | 0.1755319 |
| A_51_P1595 | 11.7    | Not Detect | 93.8    | Detected   | 3.2      | Not Detect | 42.7     | Not Detect | Arhgef9       | 3.64957265  | 0.27350427 | 0.45522388 | 0.0341151 |
| A_66_P1409 | 119     | Detected   | 248.7   | Detected   | 212.2    | Detected   | 434.2    | Detected   | Cnksr1        | 3.648739496 | 1.78319328 | 1.74587857 | 0.8532368 |
| A_51_P2241 | 208.5   | Detected   | 185.9   | Detected   | 153.8    | Detected   | 760.1    | Detected   | 2210016F16Rik | 3.645563549 | 0.73764988 | 4.0887574  | 0.8273265 |
| A_55_P2131 | 25.3    | Detected   | 40.5    | Detected   | 20.4     | Detected   | 92.2     | Detected   | Ank2          | 3.644268775 | 0.80632411 | 2.27654321 | 0.5037037 |
| A_55_P2005 | 19.9    | Detected   | 29.4    | Detected   | 13.1     | Not Detect | 72.5     | Detected   | Hbb-bh1       | 3.64321608  | 0.65829146 | 2.46598639 | 0.4455782 |
| A_51_P3780 | 11.2    | Not Detect | 26.8    | Detected   | 8.5      | Not Detect | 40.8     | Not Detect | Aoc3          | 3.642857143 | 0.75892857 | 1.52238806 | 0.3171642 |
| A_55_P2178 | 15.3    | Detected   | 147.1   | Detected   | 29.7     | Detected   | 55.7     | Detected   | P2rx5         | 3.640522876 | 1.94117647 | 0.37865398 | 0.2019035 |
| A_51_P2222 | 4107.3  | Detected   | 5890.5  | Detected   | 6178.9   | Detected   | 14910.2  | Detected   | Mlycd         | 3.630170672 | 1.50437027 | 2.53122825 | 1.0489602 |
| A_52_P4715 | 15.3    | Detected   | 20.8    | Detected   | 18.5     | Detected   | 55.5     | Detected   | Ccdc116       | 3.62745098  | 1.20915033 | 2.66826923 | 0.8894231 |
| A_51_P3222 | 340.2   | Detected   | 1078.6  | Detected   | 46.8     | Detected   | 1233.4   | Detected   | Ptp4a3        | 3.625514403 | 0.13756614 | 1.14351938 | 0.0433896 |
| A_52_P6281 | 8       | Not Detect | 5.5     | Not Detect | 17.1     | Detected   | 29       | Not Detect | Fam229a       | 3.625       | 2.1375     | 5.27272727 | 3.1090909 |
| A_51_P1396 | 70.9    | Detected   | 74.1    | Detected   | 79.3     | Detected   | 257      | Detected   | Nos3          | 3.624823695 | 1.11847673 | 3.4682861  | 1.0701754 |
| A_55_P2425 | 51.3    | Detected   | 230.7   | Detected   | 154.4    | Detected   | 185.8    | Detected   | 2810468N07Rik | 3.621832359 | 3.00974659 | 0.80537495 | 0.6692674 |
| A_51_P1172 | 1255.1  | Detected   | 1856.7  | Detected   | 1984.1   | Detected   | 4545.5   | Detected   | Zdhc2         | 3.621623775 | 1.58083021 | 2.44816072 | 1.0686164 |
| A_66_P1116 | 58561.8 | Detected   | 110987  | Detected   | 81281.2  | Detected   | 212067.3 | Detected   | Mt1           | 3.621256519 | 1.38795597 | 1.91074    | 0.7323488 |
| A_51_P5159 | 27.1    | Detected   | 16      | Detected   | 230.2    | Detected   | 98.1     | Detected   | Nfe2          | 3.619926199 | 8.49446494 | 6.13125    | 14.3875   |
| A_55_P2181 | 1329.6  | Detected   | 1355.3  | Detected   | 2093.3   | Detected   | 4811.3   | Detected   | Elmod1        | 3.6186071   | 1.57438327 | 3.54998893 | 1.5445289 |
| A_55_P2194 | 26.7    | Detected   | 38.3    | Detected   | 49.6     | Detected   | 96.6     | Detected   | Nfia          | 3.617977528 | 1.8576779  | 2.52219321 | 1.2950392 |
| A_51_P3914 | 130.6   | Detected   | 290     | Detected   | 91.1     | Detected   | 471.9    | Detected   | Il7           | 3.613323124 | 0.69754977 | 1.62724138 | 0.3141379 |
| A_66_P1206 | 6.1     | Not Detect | 89.4    | Detected   | 10.2     | Not Detect | 22       | Not Detect | Trps1         | 3.606557377 | 1.67213115 | 0.24608501 | 0.114094  |
| A_55_P1976 | 37.2    | Detected   | 57      | Detected   | 41.2     | Detected   | 133.8    | Detected   | Prkog         | 3.596774194 | 1.10752688 | 2.34736842 | 0.722807  |
| A_52_P6304 | 433.3   | Detected   | 238.9   | Detected   | 9.6      | Not Detect | 1557.7   | Compromis  | Lce1g         | 3.594968844 | 0.02215555 | 6.52030138 | 0.0401842 |
| A_55_P1959 | 18.3    | Detected   | 17.9    | Not Detect | 12.8     | Not Detect | 65.7     | Detected   | Cd164l2       | 3.590163934 | 0.69945355 | 3.67039106 | 0.7150838 |
| A_55_P2324 | 21.4    | Detected   | 33.8    | Detected   | 53.7     | Detected   | 76.8     | Detected   | 0610039H22Rik | 3.588785047 | 2.50934579 | 2.27218935 | 1.5887574 |
| A_55_P2102 | 53645.7 | Detected   | 19132.1 | Detected   | 160090.7 | Detected   | 192340.7 | Detected   | Gm10639       | 3.58538895  | 2.98422241 | 10.0532979 | 8.3676491 |
| A_55_P1966 | 1223.4  | Detected   | 906.9   | Detected   | 2197.5   | Detected   | 4375.8   | Detected   | 9930105H17Rik | 3.57675331  | 1.79622364 | 4.82500827 | 2.4230896 |
| A_55_P2149 | 23.2    | Detected   | 37.9    | Detected   | 18       | Not Detect | 82.9     | Detected   | Hif1a         | 3.573275862 | 0.77586207 | 2.18733509 | 0.474934  |
| A_55_P2024 | 136.9   | Detected   | 158.6   | Detected   | 3.2      | Not Detect | 488.9    | Detected   | Hoxb4         | 3.571219869 | 0.02337473 | 3.08259773 | 0.0201765 |
| A_66_P1181 | 64.3    | Detected   | 45.2    | Detected   | 360.4    | Detected   | 229.5    | Detected   | Fxyd3         | 3.569206843 | 5.60497667 | 5.07743363 | 7.9734513 |
| A_51_P3438 | 322     | Detected   | 730     | Detected   | 392.3    | Detected   | 1148.9   | Detected   | Traf1         | 3.568012422 | 1.21832298 | 1.57383562 | 0.5373973 |
| A_55_P1976 | 722.8   | Detected   | 930.8   | Detected   | 2328.4   | Detected   | 2578.8   | Detected   | Unc13d        | 3.56779192  | 3.22136137 | 2.77051998 | 2.5015041 |
| A_55_P2282 | 18.2    | Detected   | 18.4    | Detected   | 18.2     | Detected   | 64.9     | Detected   | 6030443J06Rik | 3.565934066 | 1          | 3.52717391 | 0.9891304 |

|            |         |            |         |            |         |            |         |            |               |             |            |            |           |
|------------|---------|------------|---------|------------|---------|------------|---------|------------|---------------|-------------|------------|------------|-----------|
| A_52_P5438 | 221.7   | Detected   | 1752.2  | Detected   | 348     | Detected   | 789.9   | Detected   | Shpk          | 3.562922869 | 1.56968877 | 0.4508047  | 0.1986075 |
| A_52_P3592 | 196.1   | Detected   | 315.1   | Detected   | 266.3   | Detected   | 698.6   | Detected   | 5830408C22Rik | 3.562468129 | 1.35798062 | 2.21707394 | 0.8451285 |
| A_51_P1241 | 12.1    | Not Detect | 17.4    | Not Detect | 39.4    | Detected   | 43.1    | Not Detect | Cyp2d22       | 3.561983471 | 3.25619835 | 2.47701149 | 2.2643678 |
| A_51_P3616 | 25.5    | Detected   | 23.8    | Detected   | 22.4    | Detected   | 90.8    | Detected   | Dopey1        | 3.560784314 | 0.87843137 | 3.81512605 | 0.9411765 |
| A_55_P2146 | 80.6    | Detected   | 80.6    | Detected   | 87.4    | Detected   | 286.7   | Detected   | Lmx1b         | 3.55707196  | 1.08436725 | 3.55707196 | 1.0843672 |
| A_55_P2140 | 60.3    | Detected   | 74.1    | Detected   | 73.2    | Detected   | 214.4   | Detected   | Gm6658        | 3.555555556 | 1.21393035 | 2.89338731 | 0.9878543 |
| A_52_P2326 | 249.3   | Detected   | 376.6   | Detected   | 1566.1  | Detected   | 884.6   | Detected   | Dhh           | 3.548335339 | 6.28198957 | 2.34891131 | 4.1585236 |
| A_55_P2141 | 41.2    | Detected   | 47.1    | Detected   | 98.9    | Detected   | 146.1   | Detected   | Nr3c2         | 3.546116505 | 2.40048544 | 3.10191083 | 2.0997877 |
| A_55_P1968 | 25.3    | Detected   | 142.5   | Detected   | 75      | Detected   | 89.7    | Detected   | Fhit          | 3.545454545 | 2.96442688 | 0.62947368 | 0.5263158 |
| A_55_P1966 | 98      | Detected   | 33.7    | Detected   | 17.2    | Detected   | 347.1   | Detected   | Ifi203        | 3.541836735 | 0.1755102  | 10.2997033 | 0.5103858 |
| A_52_P5929 | 4305.3  | Detected   | 4839.2  | Detected   | 16324.9 | Detected   | 15245   | Detected   | Dgat2         | 3.540984368 | 3.79181474 | 3.1503141  | 3.3734708 |
| A_55_P2039 | 339.6   | Detected   | 381.7   | Detected   | 377.4   | Detected   | 1202.4  | Detected   | Kcnh3         | 3.540636042 | 1.11130742 | 3.15011789 | 0.9887346 |
| A_51_P3812 | 995.5   | Detected   | 863.8   | Detected   | 386.5   | Detected   | 3521.8  | Detected   | Gulp1         | 3.537719739 | 0.38824711 | 4.07710118 | 0.4474415 |
| A_52_P6009 | 27.4    | Detected   | 36.7    | Detected   | 78.3    | Detected   | 96.9    | Detected   | Ccdc88c       | 3.53649635  | 2.85766423 | 2.64032698 | 2.133515  |
| A_66_P1296 | 39.6    | Detected   | 70      | Detected   | 62.1    | Detected   | 139.9   | Detected   | Gm2011        | 3.532828283 | 1.56818182 | 1.99857143 | 0.8871429 |
| A_55_P1971 | 6.4     | Not Detect | 19.4    | Detected   | 67.7    | Detected   | 22.6    | Not Detect | Herc3         | 3.53125     | 10.578125  | 1.16494845 | 3.4896907 |
| A_55_P2083 | 6475.4  | Detected   | 8263.4  | Detected   | 29357.8 | Detected   | 22858.5 | Detected   | Vsig1         | 3.530052198 | 4.53374309 | 2.76623424 | 3.5527507 |
| A_55_P1957 | 551     | Detected   | 827.7   | Detected   | 1129.6  | Detected   | 1943    | Detected   | Arrdc2        | 3.526315789 | 2.05009074 | 2.34746889 | 1.3647457 |
| A_55_P2079 | 121.7   | Detected   | 127.6   | Detected   | 209.4   | Detected   | 428.9   | Detected   | Lilra6        | 3.524239934 | 1.72062449 | 3.36128527 | 1.6410658 |
| A_51_P2777 | 27.1    | Detected   | 3.6     | Not Detect | 501.6   | Detected   | 95.5    | Detected   | Abcc2         | 3.52398524  | 18.5092251 | 26.5277778 | 139.33333 |
| A_51_P3698 | 96.9    | Detected   | 467     | Detected   | 98.3    | Detected   | 341.2   | Detected   | Psmb9         | 3.521155831 | 1.01444788 | 0.73062099 | 0.2104925 |
| A_52_P6545 | 2.7     | Not Detect | 59.7    | Detected   | 3.2     | Not Detect | 9.5     | Not Detect | Dmbx1         | 3.518518519 | 1.18518519 | 0.15912898 | 0.0536013 |
| A_66_P1127 | 184     | Detected   | 71.8    | Detected   | 479.7   | Detected   | 647.4   | Detected   | 5730409E04Rik | 3.518478261 | 2.60706522 | 9.01671309 | 6.6810585 |
| A_51_P1877 | 74.5    | Detected   | 138.6   | Detected   | 399.6   | Detected   | 261.9   | Detected   | Neur13        | 3.515436242 | 5.36375839 | 1.88961039 | 2.8831169 |
| A_55_P2077 | 23.3    | Detected   | 66.2    | Detected   | 16.6    | Detected   | 81.9    | Detected   | Gm5458        | 3.515021459 | 0.71244635 | 1.23716012 | 0.2507553 |
| A_55_P2034 | 20.2    | Detected   | 34.7    | Detected   | 116.9   | Detected   | 71      | Detected   | Eif4g3        | 3.514851485 | 5.78712871 | 2.04610951 | 3.3688761 |
| A_55_P2167 | 8.8     | Not Detect | 40.9    | Detected   | 23.9    | Detected   | 30.9    | Not Detect | Gm12839       | 3.511363636 | 2.71590909 | 0.75550122 | 0.5843521 |
| A_55_P1966 | 16294.4 | Detected   | 7700.4  | Detected   | 95151.3 | Detected   | 57211.3 | Detected   | Cyp2s1        | 3.511101974 | 5.83950928 | 7.42965301 | 12.35667  |
| A_55_P2020 | 356.2   | Detected   | 251.6   | Detected   | 637.9   | Detected   | 1250.1  | Detected   | 6720475J19Rik | 3.509545199 | 1.79084784 | 4.96860095 | 2.5353736 |
| A_55_P2124 | 12068.9 | Detected   | 12555.8 | Detected   | 18240.6 | Detected   | 42301.7 | Detected   | Uaca          | 3.505017027 | 1.5113722  | 3.36909635 | 1.4527629 |
| A_51_P1445 | 221.4   | Detected   | 334.8   | Detected   | 666     | Detected   | 775.2   | Detected   | Slc22a29      | 3.501355014 | 3.00813008 | 2.31541219 | 1.9892473 |
| A_55_P2013 | 3       | Not Detect | 25.8    | Detected   | 3.7     | Not Detect | 10.5    | Not Detect | Prss1         | 3.5         | 1.23333333 | 0.40697674 | 0.1434109 |
| A_51_P3783 | 33.6    | Detected   | 43.1    | Detected   | 31.5    | Detected   | 117.4   | Detected   | Coq3          | 3.494047619 | 0.9375     | 2.72389791 | 0.7308585 |
| A_55_P2088 | 997     | Detected   | 1844.4  | Detected   | 14      | Not Detect | 3482    | Detected   | Repin1        | 3.492477432 | 0.01404213 | 1.88787682 | 0.0075905 |
| A_55_P2145 | 1392.4  | Detected   | 2137.4  | Detected   | 4410.8  | Detected   | 4856.4  | Detected   | Flrt3         | 3.487790865 | 3.16776788 | 2.2721063  | 2.0636287 |
| A_51_P2469 | 152.1   | Detected   | 167.9   | Detected   | 1000.6  | Detected   | 530.3   | Detected   | Tppp3         | 3.486522025 | 6.57856673 | 3.15842764 | 5.9594997 |
| A_52_P6769 | 3.1     | Not Detect | 35.6    | Detected   | 3.7     | Not Detect | 10.8    | Not Detect | Tacr3         | 3.483870968 | 1.19354839 | 0.30337079 | 0.1039326 |
| A_51_P2212 | 2.9     | Not Detect | 3.6     | Not Detect | 20.2    | Detected   | 10.1    | Not Detect | LOC101055802  | 3.482758621 | 6.96551724 | 2.80555556 | 5.6111111 |
| A_55_P2013 | 5.8     | Not Detect | 31.5    | Detected   | 8.1     | Not Detect | 20.2    | Not Detect | Lpar1         | 3.482758621 | 1.39655172 | 0.64126984 | 0.2571429 |
| A_55_P2127 | 5       | Not Detect | 3.2     | Not Detect | 49.4    | Detected   | 17.4    | Not Detect | Gm9112        | 3.48        | 9.88       | 5.4375     | 15.4375   |

|            |         |            |         |            |         |            |         |            |               |             |             |            |            |           |
|------------|---------|------------|---------|------------|---------|------------|---------|------------|---------------|-------------|-------------|------------|------------|-----------|
| A_55_P2293 | 18.6    | Detected   | 15.2    | Not Detect | 28.7    | Detected   | 64.6    | Detected   | 1700001C19Rik | 3.47311828  | 1.54301075  | 4.25       | 1.8881579  |           |
| A_52_P2699 | 38.7    | Detected   | 44.7    | Detected   | 24.8    | Detected   | 134.4   | Detected   | Cpt1c         | 3.472868217 | 0.64082687  | 3.00671141 | 0.5548098  |           |
| A_52_P8796 | 893.7   | Detected   | 2441.4  | Detected   | 1964.5  | Detected   | 3103.3  | Detected   | Pla2g12a      | 3.472418037 | 2.19816493  | 1.27111493 | 0.8046613  |           |
| A_55_P2071 | 486.9   | Detected   | 400.5   | Detected   | 372.6   | Detected   | 1690    | Detected   | Olf75-ps1     | 3.470938591 | 0.76524954  | 4.21972534 | 0.9303371  |           |
| A_51_P2493 | 232.2   | Detected   | 248.9   | Detected   | 1354.3  | Detected   | 805.4   | Detected   | Herc3         | 3.468561585 | 5.83247201  | 3.23583769 | 5.441141   |           |
| A_55_P1985 | 3       | Not Detect | 3.7     | Not Detect | 88.8    | Detected   | 10.4    | Not Detect | Pgr           | 3.466666667 | 29.6        | 2.81081081 | 24         |           |
| A_55_P1979 | 3       | Not Detect | 3.7     | Not Detect | 107.2   | Detected   | 10.4    | Not Detect | Klrb1c        | 3.466666667 | 35.7333333  | 2.81081081 | 28.972973  |           |
| A_52_P4248 | 3       | Not Detect | 11.8    | Not Detect | 72.2    | Detected   | 10.4    | Not Detect | Mrc2          | 3.466666667 | 24.0666667  | 0.88135593 | 6.1186441  |           |
| A_52_P3012 | 3       | Not Detect | 29.6    | Detected   | 6.8     | Not Detect | 10.4    | Not Detect |               | 4-Mar       | 3.466666667 | 2.26666667 | 0.35135135 | 0.2297297 |
| A_52_P4982 | 3       | Not Detect | 29.7    | Detected   | 3.7     | Not Detect | 10.4    | Not Detect | Heph          | 3.466666667 | 1.23333333  | 0.35016835 | 0.1245791  |           |
| A_52_P5477 | 29.8    | Detected   | 14.4    | Not Detect | 49.3    | Detected   | 103.3   | Detected   | E030030I06Rik | 3.466442953 | 1.65436242  | 7.17361111 | 3.4236111  |           |
| A_52_P5693 | 478.1   | Detected   | 1212.2  | Detected   | 1270.7  | Detected   | 1656.9  | Detected   | Dbt           | 3.465592972 | 2.65781217  | 1.36685365 | 1.0482594  |           |
| A_55_P1988 | 2.8     | Not Detect | 3.4     | Not Detect | 39      | Detected   | 9.7     | Not Detect | Tox           | 3.464285714 | 13.9285714  | 2.85294118 | 11.470588  |           |
| A_52_P3211 | 2.8     | Not Detect | 3.8     | Not Detect | 37.5    | Detected   | 9.7     | Not Detect | Defb1         | 3.464285714 | 13.3928571  | 2.55263158 | 9.8684211  |           |
| A_55_P2056 | 2.8     | Not Detect | 8.3     | Not Detect | 21.2    | Detected   | 9.7     | Not Detect | Asrg1         | 3.464285714 | 7.57142857  | 1.1686747  | 2.5542169  |           |
| A_52_P3113 | 2.8     | Not Detect | 23.6    | Detected   | 3.4     | Not Detect | 9.7     | Not Detect | Hcn1          | 3.464285714 | 1.21428571  | 0.41101695 | 0.1440678  |           |
| A_55_P2088 | 42.7    | Detected   | 31.6    | Detected   | 36.7    | Detected   | 147.9   | Detected   | Olf1312       | 3.463700234 | 0.85948478  | 4.68037975 | 1.1613924  |           |
| A_55_P2290 | 8.2     | Not Detect | 54.1    | Detected   | 15.5    | Not Detect | 28.4    | Not Detect | Trav3n-3      | 3.463414634 | 1.8902439   | 0.52495379 | 0.2865065  |           |
| A_51_P2019 | 209.5   | Detected   | 116.5   | Detected   | 210.4   | Detected   | 725.3   | Detected   | Angpt2        | 3.462052506 | 1.00429594  | 6.22575107 | 1.8060086  |           |
| A_55_P2369 | 1637.1  | Detected   | 3979.8  | Detected   | 2244.1  | Detected   | 5666.7  | Detected   | Nr1h4         | 3.461425692 | 1.37077759  | 1.42386552 | 0.5638726  |           |
| A_51_P2826 | 20.1    | Detected   | 69      | Detected   | 25.8    | Detected   | 69.5    | Detected   | Maats1        | 3.457711443 | 1.28358209  | 1.00724638 | 0.373913   |           |
| A_55_P2144 | 4129.1  | Detected   | 6466.4  | Detected   | 12726.5 | Detected   | 14267.7 | Detected   | Flrt3         | 3.455401904 | 3.08214865  | 2.20643635 | 1.9680966  |           |
| A_51_P4957 | 350.3   | Detected   | 104.1   | Detected   | 58.4    | Detected   | 1209.6  | Detected   | Plin4         | 3.453040251 | 0.16671424  | 11.6195965 | 0.560999   |           |
| A_51_P2271 | 918.7   | Detected   | 1955.2  | Detected   | 1719.8  | Detected   | 3171.2  | Detected   | 2310030G06Rik | 3.451834113 | 1.87199303  | 1.62193126 | 0.8796031  |           |
| A_51_P3565 | 3.1     | Not Detect | 22.3    | Detected   | 3.8     | Not Detect | 10.7    | Not Detect | Mxra7         | 3.451612903 | 1.22580645  | 0.47982063 | 0.1704036  |           |
| A_55_P2397 | 406.6   | Detected   | 426.6   | Detected   | 295.6   | Detected   | 1402.5  | Detected   | B930025B16Rik | 3.449335957 | 0.72700443  | 3.28762307 | 0.6929208  |           |
| A_52_P1014 | 15956.3 | Detected   | 18310.6 | Detected   | 36648.9 | Detected   | 55032.2 | Detected   | Ddn           | 3.448932397 | 2.29682947  | 3.00548316 | 2.0015128  |           |
| A_55_P2105 | 2.9     | Not Detect | 3.6     | Not Detect | 40      | Detected   | 10      | Not Detect | Mrap2         | 3.448275862 | 13.7931034  | 2.77777778 | 11.111111  |           |
| A_55_P2170 | 2.9     | Not Detect | 4.8     | Not Detect | 68.1    | Detected   | 10      | Not Detect | Dock3         | 3.448275862 | 23.4827586  | 2.08333333 | 14.1875    |           |
| A_51_P2315 | 2.9     | Not Detect | 10      | Not Detect | 19      | Detected   | 10      | Not Detect | Mill2         | 3.448275862 | 6.55172414  | 1          | 1.9        |           |
| A_55_P1977 | 16.8    | Detected   | 18      | Detected   | 12.1    | Not Detect | 57.9    | Detected   | Insm1         | 3.446428571 | 0.7202381   | 3.21666667 | 0.6722222  |           |
| A_55_P2081 | 86.4    | Detected   | 82.4    | Detected   | 102.8   | Detected   | 297.6   | Detected   | Slc44a1       | 3.444444444 | 1.18981481  | 3.61165049 | 1.2475728  |           |
| A_55_P1956 | 26.1    | Detected   | 881.7   | Detected   | 13.5    | Not Detect | 89.9    | Detected   | Efr3b         | 3.444444444 | 0.51724138  | 0.10196212 | 0.0153113  |           |
| A_55_P1968 | 297.7   | Detected   | 499.5   | Detected   | 802.1   | Detected   | 1024.4  | Detected   | Rbpms         | 3.441048035 | 2.69432314  | 2.05085085 | 1.6058058  |           |
| A_51_P3941 | 3.2     | Not Detect | 5.9     | Not Detect | 84.9    | Detected   | 11      | Not Detect | Aadac         | 3.4375      | 26.53125    | 1.86440678 | 14.389831  |           |
| A_55_P2060 | 105     | Detected   | 89.9    | Detected   | 76      | Detected   | 360.8   | Detected   | Scube2        | 3.436190476 | 0.72380952  | 4.01334816 | 0.8453838  |           |
| A_55_P2120 | 121.9   | Detected   | 107     | Detected   | 142.7   | Detected   | 418.8   | Detected   | Mob3b         | 3.435602953 | 1.17063167  | 3.91401869 | 1.3336449  |           |
| A_55_P2043 | 3       | Not Detect | 7       | Not Detect | 20      | Detected   | 10.3    | Not Detect | Cacna1f       | 3.433333333 | 6.66666667  | 1.47142857 | 2.8571429  |           |
| A_52_P3551 | 3       | Not Detect | 25.9    | Detected   | 3.8     | Not Detect | 10.3    | Not Detect | Tnc           | 3.433333333 | 1.26666667  | 0.3976834  | 0.1467181  |           |
| A_55_P2086 | 3       | Not Detect | 35.4    | Detected   | 5.3     | Not Detect | 10.3    | Not Detect | 1700062C10Rik | 3.433333333 | 1.76666667  | 0.29096045 | 0.1497175  |           |

|            |                  |                  |                  |                  |               |             |            |            |           |
|------------|------------------|------------------|------------------|------------------|---------------|-------------|------------|------------|-----------|
| A_55_P2088 | 3 Not Detect     | 38.9 Detected    | 37.2 Detected    | 10.3 Not Detect  | Fbln5         | 3.433333333 | 12.4       | 0.26478149 | 0.9562982 |
| A_51_P4292 | 3 Not Detect     | 181.6 Detected   | 3.7 Not Detect   | 10.3 Not Detect  | Prok2         | 3.433333333 | 1.23333333 | 0.05671806 | 0.0203744 |
| A_55_P2000 | 819.7 Detected   | 1202.9 Detected  | 972.2 Detected   | 2813.8 Detected  | Rgs11         | 3.432719288 | 1.18604367 | 2.33918031 | 0.8082135 |
| A_51_P4995 | 8.8 Not Detect   | 30.8 Detected    | 5.6 Not Detect   | 30.2 Not Detect  | Osr2          | 3.431818182 | 0.63636364 | 0.98051948 | 0.1818182 |
| A_55_P2316 | 233.9 Detected   | 291.8 Detected   | 255.8 Detected   | 802.7 Detected   | 6720407P12Rik | 3.431808465 | 1.09362976 | 2.75085675 | 0.8766278 |
| A_51_P3433 | 686.3 Detected   | 1787.2 Detected  | 1294.2 Detected  | 2355.2 Detected  | Isoc2b        | 3.431735393 | 1.88576424 | 1.31781558 | 0.7241495 |
| A_51_P3538 | 3142.3 Detected  | 1836.1 Detected  | 21663.7 Detected | 10774.9 Detected | Sult1c2       | 3.428985138 | 6.89421761 | 5.86836229 | 11.798758 |
| A_51_P3812 | 28.9 Detected    | 83.4 Detected    | 50.1 Detected    | 99 Detected      | Zhx2          | 3.425605536 | 1.73356401 | 1.18705036 | 0.6007194 |
| A_55_P2091 | 69.8 Detected    | 188.4 Detected   | 145.3 Detected   | 238.8 Detected   | Casp4         | 3.421203438 | 2.08166189 | 1.26751592 | 0.7712314 |
| A_52_P4677 | 3.1 Not Detect   | 20.3 Detected    | 3.8 Not Detect   | 10.6 Not Detect  | Nsg1          | 3.419354839 | 1.22580645 | 0.52216749 | 0.1871921 |
| A_52_P6700 | 3.1 Not Detect   | 24.1 Detected    | 3.8 Not Detect   | 10.6 Not Detect  | Rsad2         | 3.419354839 | 1.22580645 | 0.43983402 | 0.1576763 |
| A_55_P2167 | 3.1 Not Detect   | 24.5 Detected    | 8.1 Not Detect   | 10.6 Not Detect  | Scube3        | 3.419354839 | 2.61290323 | 0.43265306 | 0.3306122 |
| A_52_P6424 | 3.1 Not Detect   | 25.1 Detected    | 297 Detected     | 10.6 Not Detect  | Kcnk1         | 3.419354839 | 95.8064516 | 0.42231076 | 11.832669 |
| A_52_P1674 | 3.1 Not Detect   | 29.7 Detected    | 3.8 Not Detect   | 10.6 Not Detect  | Tnk1          | 3.419354839 | 1.22580645 | 0.35690236 | 0.1279461 |
| A_55_P2083 | 268.5 Detected   | 746.6 Detected   | 446.2 Detected   | 917.1 Detected   | Lpin3         | 3.415642458 | 1.66182495 | 1.2283686  | 0.5976426 |
| A_52_P4613 | 2.9 Not Detect   | 6.9 Not Detect   | 21.1 Detected    | 9.9 Not Detect   | Upk3a         | 3.413793103 | 7.27586207 | 1.43478261 | 3.057971  |
| A_52_P8761 | 2.9 Not Detect   | 24.2 Detected    | 3.5 Not Detect   | 9.9 Not Detect   | E030010N08Rik | 3.413793103 | 1.20689655 | 0.40909091 | 0.1446281 |
| A_55_P2077 | 2.9 Not Detect   | 78.4 Detected    | 18.1 Detected    | 9.9 Not Detect   | Csgalnact1    | 3.413793103 | 6.24137931 | 0.12627551 | 0.2308673 |
| A_51_P1725 | 9.2 Not Detect   | 24529.5 Detected | 3.6 Not Detect   | 31.4 Not Detect  | Cxcl12        | 3.413043478 | 0.39130435 | 0.00128009 | 0.0001468 |
| A_52_P2970 | 140.4 Detected   | 200.8 Detected   | 557.1 Detected   | 479 Detected     | Matn3         | 3.411680912 | 3.96794872 | 2.38545817 | 2.7744024 |
| A_55_P1987 | 17273 Detected   | 35253.7 Detected | 17047.2 Detected | 58902.7 Detected | Rai1          | 3.410102472 | 0.98692757 | 1.6708232  | 0.4835578 |
| A_55_P2071 | 75.1 Detected    | 111.2 Detected   | 81.4 Detected    | 255.9 Detected   | Tln2          | 3.407456724 | 1.08388815 | 2.30125899 | 0.7320144 |
| A_51_P4777 | 2.7 Not Detect   | 3.2 Not Detect   | 17.3 Detected    | 9.2 Not Detect   | 4932415M13Rik | 3.407407407 | 6.40740741 | 2.875      | 5.40625   |
| A_55_P1966 | 2.7 Not Detect   | 25.4 Detected    | 4.7 Not Detect   | 9.2 Not Detect   | Krtap20-2     | 3.407407407 | 1.74074074 | 0.36220472 | 0.1850394 |
| A_55_P1962 | 2.7 Not Detect   | 29.1 Detected    | 3.5 Not Detect   | 9.2 Not Detect   | Glec1b        | 3.407407407 | 1.2962963  | 0.3161512  | 0.1202749 |
| A_51_P5171 | 67.6 Detected    | 180.3 Detected   | 134.5 Detected   | 230.3 Detected   | Sort1         | 3.406804734 | 1.98964497 | 1.27731559 | 0.7459789 |
| A_51_P2404 | 3.2 Not Detect   | 20.9 Detected    | 3.8 Not Detect   | 10.9 Not Detect  | Pcdhb14       | 3.40625     | 1.1875     | 0.5215311  | 0.1818182 |
| A_55_P1994 | 25495.4 Detected | 6922.5 Detected  | 6290.5 Detected  | 86809 Detected   | 2310042E22Rik | 3.404888725 | 0.24673078 | 12.5401228 | 0.9087035 |
| A_51_P4502 | 350.1 Detected   | 609.8 Detected   | 506.9 Detected   | 1191.8 Detected  | 2010003K11Rik | 3.404170237 | 1.44787204 | 1.95441128 | 0.8312561 |
| A_66_P1140 | 15.9 Detected    | 16.8 Detected    | 9.1 Not Detect   | 54.1 Detected    | Kctd7         | 3.402515723 | 0.57232704 | 3.2202381  | 0.5416667 |
| A_55_P1961 | 73.7 Detected    | 227.2 Detected   | 215 Detected     | 250.7 Detected   | Atg4c         | 3.401628223 | 2.91723202 | 1.1034331  | 0.9463028 |
| A_51_P3186 | 583.6 Detected   | 363.7 Detected   | 2733.4 Detected  | 1984.8 Detected  | Anks4b        | 3.400959561 | 4.68368746 | 5.45724498 | 7.5155348 |
| A_66_P1380 | 3 Not Detect     | 28.1 Detected    | 3.6 Not Detect   | 10.2 Not Detect  | Esr1          | 3.4         | 1.2        | 0.36298932 | 0.1281139 |
| A_55_P2011 | 3 Not Detect     | 28.2 Detected    | 3.7 Not Detect   | 10.2 Not Detect  | Cyp4a10       | 3.4         | 1.23333333 | 0.36170213 | 0.1312057 |
| A_52_P3469 | 3 Not Detect     | 28.9 Detected    | 3.7 Not Detect   | 10.2 Not Detect  | Hoxc9         | 3.4         | 1.23333333 | 0.35294118 | 0.1280277 |
| A_55_P2088 | 3 Not Detect     | 31.3 Detected    | 3.7 Not Detect   | 10.2 Not Detect  | Fbln7         | 3.4         | 1.23333333 | 0.32587859 | 0.1182109 |
| A_55_P1990 | 3 Not Detect     | 71 Detected      | 3.7 Not Detect   | 10.2 Not Detect  | Cd200r3       | 3.4         | 1.23333333 | 0.14366197 | 0.0521127 |
| A_66_P1099 | 317.3 Detected   | 574.7 Detected   | 814.3 Detected   | 1078.3 Detected  | Fermt1        | 3.398361172 | 2.566341   | 1.87628328 | 1.4169132 |
| A_51_P4032 | 59.8 Detected    | 106.6 Detected   | 98.8 Detected    | 203.1 Detected   | Ccdc116       | 3.39632107  | 1.65217391 | 1.90525328 | 0.9268293 |
| A_66_P1385 | 111.8 Detected   | 132.6 Detected   | 154.8 Detected   | 379.6 Detected   | 4833419G08Rik | 3.395348837 | 1.38461538 | 2.8627451  | 1.1674208 |

|            |                  |                  |                 |                  |               |             |            |            |           |
|------------|------------------|------------------|-----------------|------------------|---------------|-------------|------------|------------|-----------|
| A_55_P2016 | 2.8 Not Detect   | 25 Detected      | 32.8 Detected   | 9.5 Not Detect   | Gm7092        | 3.392857143 | 11.7142857 | 0.38       | 1.312     |
| A_55_P2025 | 665.2 Detected   | 1073.8 Detected  | 431.7 Detected  | 2256.8 Detected  | Chd9          | 3.39266386  | 0.64897775 | 2.10169492 | 0.4020302 |
| A_55_P2054 | 393.4 Detected   | 420.5 Detected   | 1040.4 Detected | 1334.5 Detected  | Tulp2         | 3.392221657 | 2.6446365  | 3.17360285 | 2.4741974 |
| A_51_P3100 | 3.1 Not Detect   | 3.7 Not Detect   | 90.7 Detected   | 10.5 Not Detect  | Olf1r1299     | 3.387096774 | 29.2580645 | 2.83783784 | 24.513514 |
| A_51_P1852 | 3.1 Not Detect   | 3.8 Not Detect   | 40.9 Detected   | 10.5 Not Detect  | Gdf10         | 3.387096774 | 13.1935484 | 2.76315789 | 10.763158 |
| A_55_P1986 | 3.1 Not Detect   | 3.8 Not Detect   | 31.4 Detected   | 10.5 Not Detect  | 4921524L21Rik | 3.387096774 | 10.1290323 | 2.76315789 | 8.2631579 |
| A_55_P1955 | 3.1 Not Detect   | 46 Detected      | 3.7 Not Detect  | 10.5 Not Detect  | Trp53i11      | 3.387096774 | 1.19354839 | 0.22826087 | 0.0804348 |
| A_51_P4061 | 3.1 Not Detect   | 72.8 Detected    | 3.8 Not Detect  | 10.5 Not Detect  | Calcb         | 3.387096774 | 1.22580645 | 0.14423077 | 0.0521978 |
| A_55_P2094 | 128.5 Detected   | 139.6 Detected   | 107 Detected    | 435 Detected     | Gm4736        | 3.385214008 | 0.83268482 | 3.11604585 | 0.7664756 |
| A_51_P3930 | 351.8 Detected   | 710.3 Detected   | 233.6 Detected  | 1189.7 Detected  | Tigd2         | 3.381750995 | 0.66401364 | 1.67492609 | 0.3288751 |
| A_51_P4306 | 2.9 Not Detect   | 3.4 Not Detect   | 26.8 Detected   | 9.8 Not Detect   | Gpr33         | 3.379310345 | 9.24137931 | 2.88235294 | 7.8823529 |
| A_55_P1970 | 2.9 Not Detect   | 3.5 Not Detect   | 127 Detected    | 9.8 Not Detect   | Vmn2r16       | 3.379310345 | 43.7931034 | 2.8        | 36.285714 |
| A_51_P5018 | 2.9 Not Detect   | 32.8 Detected    | 3.4 Not Detect  | 9.8 Not Detect   | Pitx2         | 3.379310345 | 1.17241379 | 0.29878049 | 0.1036585 |
| A_52_P2040 | 2.9 Not Detect   | 53.9 Detected    | 3.4 Not Detect  | 9.8 Not Detect   | 4933412A08Rik | 3.379310345 | 1.17241379 | 0.18181818 | 0.0630798 |
| A_51_P3016 | 2.9 Not Detect   | 100.2 Detected   | 34.3 Detected   | 9.8 Not Detect   | Kazn          | 3.379310345 | 11.8275862 | 0.09780439 | 0.3423154 |
| A_51_P3169 | 239.7 Detected   | 687.8 Detected   | 35.4 Detected   | 809.4 Detected   | 8430408G22Rik | 3.376720901 | 0.14768461 | 1.17679558 | 0.0514685 |
| A_55_P2112 | 4.8 Not Detect   | 17.7 Detected    | 18.3 Detected   | 16.2 Not Detect  | Pate2         | 3.375       | 3.8125     | 0.91525424 | 1.0338983 |
| A_51_P3583 | 3.2 Not Detect   | 529.9 Detected   | 3.8 Not Detect  | 10.8 Not Detect  | Jam3          | 3.375       | 1.1875     | 0.0203812  | 0.0071712 |
| A_55_P2035 | 23.9 Detected    | 47 Detected      | 11.8 Not Detect | 80.6 Detected    | Rnf208        | 3.372384937 | 0.49372385 | 1.71489362 | 0.2510638 |
| A_51_P2341 | 39 Detected      | 106.8 Detected   | 78 Detected     | 131.3 Detected   | Cdk11         | 3.366666667 | 2          | 1.22940075 | 0.7303371 |
| A_55_P2054 | 3 Not Detect     | 10.3 Not Detect  | 56.1 Detected   | 10.1 Not Detect  | Lrrc49        | 3.366666667 | 18.7       | 0.98058252 | 5.4466019 |
| A_55_P2074 | 3 Not Detect     | 22.7 Detected    | 4.1 Not Detect  | 10.1 Not Detect  | Slc6a4        | 3.366666667 | 1.36666667 | 0.44493392 | 0.1806167 |
| A_55_P1973 | 3 Not Detect     | 30.7 Detected    | 3.9 Not Detect  | 10.1 Not Detect  | LOC101055746  | 3.366666667 | 1.3        | 0.32899023 | 0.1270358 |
| A_55_P2344 | 20 Detected      | 75.8 Detected    | 17.2 Not Detect | 67.2 Detected    | E330037115Rik | 3.36        | 0.86       | 0.88654354 | 0.2269129 |
| A_51_P3874 | 2.8 Not Detect   | 3.3 Not Detect   | 245.2 Detected  | 9.4 Not Detect   | Serpina12     | 3.357142857 | 87.5714286 | 2.84848485 | 74.30303  |
| A_55_P2154 | 2.8 Not Detect   | 3.3 Not Detect   | 17.1 Detected   | 9.4 Not Detect   | Cdhr4         | 3.357142857 | 6.10714286 | 2.84848485 | 5.1818182 |
| A_55_P2227 | 2.8 Not Detect   | 3.3 Not Detect   | 28.5 Detected   | 9.4 Not Detect   | AI480624      | 3.357142857 | 10.1785714 | 2.84848485 | 8.6363636 |
| A_52_P3084 | 2.8 Not Detect   | 35.1 Detected    | 3.3 Not Detect  | 9.4 Not Detect   | 1810011H11Rik | 3.357142857 | 1.17857143 | 0.26780627 | 0.0940171 |
| A_52_P1465 | 2.8 Not Detect   | 38.6 Detected    | 3.4 Not Detect  | 9.4 Not Detect   | Speer4b       | 3.357142857 | 1.21428571 | 0.24352332 | 0.0880829 |
| A_51_P1631 | 192.9 Detected   | 355 Detected     | 447.5 Detected  | 647.3 Detected   | Rbm12b1       | 3.355624676 | 2.31985485 | 1.82338028 | 1.2605634 |
| A_55_P2163 | 3.1 Not Detect   | 3.7 Not Detect   | 235 Detected    | 10.4 Not Detect  | Slc7a9        | 3.35483871  | 75.8064516 | 2.81081081 | 63.513514 |
| A_55_P2122 | 3.1 Not Detect   | 3.7 Not Detect   | 77.4 Detected   | 10.4 Not Detect  | Celf2         | 3.35483871  | 24.9677419 | 2.81081081 | 20.918919 |
| A_52_P1799 | 3.1 Not Detect   | 3.7 Not Detect   | 33 Detected     | 10.4 Not Detect  | Abcg8         | 3.35483871  | 10.6451613 | 2.81081081 | 8.9189189 |
| A_51_P3633 | 3.1 Not Detect   | 153.8 Detected   | 3.8 Not Detect  | 10.4 Not Detect  | Prkd1         | 3.35483871  | 1.22580645 | 0.06762029 | 0.0247074 |
| A_52_P3775 | 95.5 Detected    | 313.7 Detected   | 395.8 Detected  | 320.3 Detected   | Ap1s3         | 3.353926702 | 4.14450262 | 1.02103921 | 1.261715  |
| A_66_P1246 | 723.2 Detected   | 562.1 Detected   | 1741.5 Detected | 2423.2 Detected  | Gxy1t2        | 3.350663717 | 2.40804757 | 4.31097669 | 3.0982032 |
| A_52_P6505 | 26.7 Detected    | 41.1 Detected    | 63.1 Detected   | 89.4 Detected    | Prox2         | 3.348314607 | 2.36329588 | 2.17518248 | 1.5352798 |
| A_51_P1631 | 2482.5 Detected  | 2724.7 Detected  | 5336.5 Detected | 8311.6 Detected  | Bdh1          | 3.348076536 | 2.14964753 | 3.05046427 | 1.9585642 |
| A_55_P2253 | 6.9 Not Detect   | 21.7 Detected    | 14.7 Not Detect | 23.1 Not Detect  | 9330198I05Rik | 3.347826087 | 2.13043478 | 1.06451613 | 0.6774194 |
| A_55_P2134 | 10547.8 Detected | 15627.1 Detected | 30356 Detected  | 35299.1 Detected | Qsox1         | 3.346584122 | 2.87794611 | 2.25883881 | 1.9425229 |

|            |         |            |         |            |         |            |         |            |               |             |            |            |           |
|------------|---------|------------|---------|------------|---------|------------|---------|------------|---------------|-------------|------------|------------|-----------|
| A_55_P1984 | 2182.7  | Detected   | 2509.6  | Detected   | 9205.1  | Detected   | 7303    | Detected   | Smtnl2        | 3.34585605  | 4.21729967 | 2.9100255  | 3.6679551 |
| A_55_P2114 | 2.9     | Not Detect | 3.4     | Not Detect | 30.4    | Detected   | 9.7     | Not Detect | Tceal3        | 3.344827586 | 10.4827586 | 2.85294118 | 8.9411765 |
| A_52_P8873 | 2.9     | Not Detect | 3.4     | Not Detect | 102.4   | Detected   | 9.7     | Not Detect | 1700109G14Rik | 3.344827586 | 35.3103448 | 2.85294118 | 30.117647 |
| A_55_P2024 | 2.9     | Not Detect | 21.6    | Detected   | 3.9     | Not Detect | 9.7     | Not Detect | Raver2        | 3.344827586 | 1.34482759 | 0.44907407 | 0.1805556 |
| A_55_P2007 | 3.2     | Not Detect | 21.8    | Detected   | 3.9     | Not Detect | 10.7    | Not Detect | Rnf144b       | 3.34375     | 1.21875    | 0.49082569 | 0.1788991 |
| A_66_P1090 | 3.2     | Not Detect | 28      | Detected   | 3.8     | Not Detect | 10.7    | Not Detect | Lrguk         | 3.34375     | 1.1875     | 0.38214286 | 0.1357143 |
| A_51_P2419 | 3.2     | Not Detect | 37.8    | Detected   | 3.9     | Not Detect | 10.7    | Not Detect | Col5a3        | 3.34375     | 1.21875    | 0.28306878 | 0.1031746 |
| A_51_P3683 | 110.3   | Detected   | 3084.5  | Detected   | 5.8     | Not Detect | 368.7   | Detected   | Vip           | 3.342701723 | 0.05258386 | 0.11953315 | 0.0018804 |
| A_55_P2062 | 33.9    | Detected   | 25.5    | Detected   | 20.1    | Detected   | 113.3   | Detected   | Smyd1         | 3.342182891 | 0.59292035 | 4.44313725 | 0.7882353 |
| A_55_P2062 | 133.2   | Detected   | 148.5   | Detected   | 203.2   | Detected   | 445     | Detected   | Pde6a         | 3.340840841 | 1.52552553 | 2.996633   | 1.3683502 |
| A_66_P1046 | 31.2    | Detected   | 143.7   | Detected   | 223.4   | Detected   | 104.1   | Detected   | 4930509E16Rik | 3.336538462 | 7.16025641 | 0.72442589 | 1.5546277 |
| A_51_P2216 | 70.5    | Detected   | 115.4   | Detected   | 24.5    | Detected   | 235.2   | Detected   | Trim62        | 3.336170213 | 0.34751773 | 2.03812825 | 0.212305  |
| A_55_P1989 | 237.4   | Detected   | 487.5   | Detected   | 209.7   | Detected   | 792     | Detected   | Gm6557        | 3.336141533 | 0.88331929 | 1.62461538 | 0.4301538 |
| A_55_P2005 | 442.8   | Detected   | 1419    | Detected   | 416.3   | Detected   | 1476.6  | Detected   | Ifih1         | 3.334688347 | 0.94015357 | 1.04059197 | 0.2933756 |
| A_51_P1952 | 3       | Not Detect | 3.5     | Not Detect | 22.7    | Detected   | 10      | Not Detect | Arl13a        | 3.333333333 | 7.56666667 | 2.85714286 | 6.4857143 |
| A_55_P1969 | 3       | Not Detect | 3.5     | Not Detect | 34.8    | Detected   | 10      | Not Detect | Abcc6         | 3.333333333 | 11.6       | 2.85714286 | 9.9428571 |
| A_55_P2306 | 63.3    | Detected   | 115.4   | Detected   | 170.7   | Detected   | 211     | Detected   | 4931406E20Rik | 3.333333333 | 2.69668246 | 1.82842288 | 1.4792028 |
| A_51_P2621 | 3       | Not Detect | 18.1    | Detected   | 3.5     | Not Detect | 10      | Not Detect | Foxf1         | 3.333333333 | 1.16666667 | 0.55248619 | 0.1933702 |
| A_55_P2106 | 3       | Not Detect | 19.3    | Detected   | 3.6     | Not Detect | 10      | Not Detect | Gm15023       | 3.333333333 | 1.2        | 0.51813472 | 0.1865285 |
| A_52_P5170 | 3       | Not Detect | 19.5    | Detected   | 3.6     | Not Detect | 10      | Not Detect | 9530091C08Rik | 3.333333333 | 1.2        | 0.51282051 | 0.1846154 |
| A_55_P2152 | 3       | Not Detect | 21.3    | Detected   | 6.2     | Not Detect | 10      | Not Detect | Adam28        | 3.333333333 | 2.06666667 | 0.46948357 | 0.2910798 |
| A_51_P3426 | 3       | Not Detect | 22.6    | Detected   | 7       | Not Detect | 10      | Not Detect | Cd79b         | 3.333333333 | 2.33333333 | 0.44247788 | 0.3097345 |
| A_55_P2101 | 3       | Not Detect | 65.1    | Detected   | 3.6     | Not Detect | 10      | Not Detect | Kpna7         | 3.333333333 | 1.2        | 0.15360983 | 0.0552995 |
| A_55_P2096 | 2.7     | Not Detect | 3.1     | Not Detect | 18.4    | Detected   | 9       | Not Detect | Rfx8          | 3.333333333 | 6.81481481 | 2.90322581 | 5.9354839 |
| A_51_P4881 | 2.7     | Not Detect | 3.1     | Not Detect | 31.7    | Detected   | 9       | Not Detect | Lrrtm3        | 3.333333333 | 11.7407407 | 2.90322581 | 10.225806 |
| A_51_P4379 | 2.7     | Not Detect | 3.1     | Not Detect | 41.1    | Detected   | 9       | Not Detect | Agtr2         | 3.333333333 | 15.2222222 | 2.90322581 | 13.258065 |
| A_55_P2121 | 2.7     | Not Detect | 3.2     | Not Detect | 58.4    | Detected   | 9       | Not Detect | E530001K10Rik | 3.333333333 | 21.6296296 | 2.8125     | 18.25     |
| A_55_P2076 | 2.7     | Not Detect | 3.5     | Not Detect | 24.2    | Detected   | 9       | Not Detect | Creb5         | 3.333333333 | 8.96296296 | 2.57142857 | 6.9142857 |
| A_55_P2066 | 2.7     | Not Detect | 13.9    | Not Detect | 27.4    | Detected   | 9       | Not Detect | Hck           | 3.333333333 | 10.1481481 | 0.64748201 | 1.971223  |
| A_55_P2047 | 2.7     | Not Detect | 14.1    | Not Detect | 24.9    | Detected   | 9       | Not Detect | Tmc5          | 3.333333333 | 9.22222222 | 0.63829787 | 1.7659574 |
| A_55_P1969 | 2.7     | Not Detect | 17.5    | Detected   | 5.3     | Not Detect | 9       | Not Detect | Hsd3b4        | 3.333333333 | 1.96296296 | 0.51428571 | 0.3028571 |
| A_52_P4704 | 2.7     | Not Detect | 21.1    | Detected   | 3.2     | Not Detect | 9       | Not Detect | D3Bwg0562e    | 3.333333333 | 1.18518519 | 0.42654028 | 0.1516588 |
| A_55_P2005 | 2.7     | Not Detect | 99.2    | Detected   | 3.2     | Not Detect | 9       | Not Detect | Fmn2          | 3.333333333 | 1.18518519 | 0.09072581 | 0.0322581 |
| A_55_P2010 | 5084.4  | Detected   | 4017.5  | Detected   | 10465.9 | Detected   | 16947   | Detected   | Slc6a9        | 3.333136653 | 2.05843364 | 4.21829496 | 2.6050778 |
| A_55_P2142 | 15310.1 | Detected   | 29540.1 | Detected   | 14863.7 | Detected   | 50991.9 | Detected   | Rai1          | 3.330605287 | 0.97084278 | 1.72619253 | 0.5031703 |
| A_55_P2334 | 151.6   | Detected   | 137.1   | Detected   | 102.8   | Detected   | 504.5   | Detected   | Rsf1          | 3.327836412 | 0.67810026 | 3.67979577 | 0.7498177 |
| A_55_P1994 | 34.1    | Detected   | 102.7   | Detected   | 95.2    | Detected   | 113.4   | Detected   | Tmem184a      | 3.325513196 | 2.79178886 | 1.10418695 | 0.9269718 |
| A_55_P1996 | 768.9   | Detected   | 763.4   | Detected   | 3598.3  | Detected   | 2556.3  | Detected   | Fgfr3         | 3.324619586 | 4.67980231 | 3.34857218 | 4.7135185 |
| A_52_P1977 | 7.4     | Not Detect | 61.9    | Detected   | 3.3     | Not Detect | 24.6    | Not Detect | Hmgcll1       | 3.324324324 | 0.44594595 | 0.39741519 | 0.0533118 |
| A_55_P2009 | 3.1     | Not Detect | 8.4     | Not Detect | 22.1    | Detected   | 10.3    | Not Detect | Atp1a4        | 3.322580645 | 7.12903226 | 1.22619048 | 2.6309524 |

|            |                  |                  |                  |                  |               |             |            |            |           |
|------------|------------------|------------------|------------------|------------------|---------------|-------------|------------|------------|-----------|
| A_52_P1920 | 3.1 Not Detect   | 20.5 Detected    | 3.7 Not Detect   | 10.3 Not Detect  | Agbl4         | 3.322580645 | 1.19354839 | 0.50243902 | 0.1804878 |
| A_55_P1984 | 3.1 Not Detect   | 107 Detected     | 3.7 Not Detect   | 10.3 Not Detect  | Lrrk2         | 3.322580645 | 1.19354839 | 0.09626168 | 0.0345794 |
| A_55_P1975 | 2.8 Not Detect   | 3.2 Not Detect   | 19.3 Detected    | 9.3 Not Detect   | Wdr63         | 3.321428571 | 6.89285714 | 2.90625    | 6.03125   |
| A_55_P2042 | 2.8 Not Detect   | 3.9 Not Detect   | 42 Detected      | 9.3 Not Detect   | Wfdc8         | 3.321428571 | 15         | 2.38461538 | 10.769231 |
| A_51_P3785 | 2.8 Not Detect   | 17.8 Detected    | 3.3 Not Detect   | 9.3 Not Detect   | Atf7ip2       | 3.321428571 | 1.17857143 | 0.52247191 | 0.1853933 |
| A_66_P1186 | 2.8 Not Detect   | 25.6 Detected    | 3.3 Not Detect   | 9.3 Not Detect   | Gm46          | 3.321428571 | 1.17857143 | 0.36328125 | 0.1289063 |
| A_65_P1993 | 21.3 Detected    | 43.2 Detected    | 12.2 Not Detect  | 70.7 Detected    | Zdhhc23       | 3.319248826 | 0.57276995 | 1.63657407 | 0.2824074 |
| A_51_P4147 | 11341.8 Detected | 16653.9 Detected | 22447.5 Detected | 37579.7 Detected | Ddt           | 3.313380592 | 1.9791832  | 2.25651049 | 1.3478825 |
| A_51_P2970 | 3.2 Not Detect   | 107 Detected     | 3.8 Not Detect   | 10.6 Not Detect  | Tmod1         | 3.3125      | 1.1875     | 0.09906542 | 0.035514  |
| A_55_P2106 | 2.9 Not Detect   | 3.3 Not Detect   | 46.9 Detected    | 9.6 Not Detect   | Vmn1r175      | 3.310344828 | 16.1724138 | 2.90909091 | 14.212121 |
| A_55_P2127 | 2.9 Not Detect   | 3.3 Not Detect   | 22.1 Detected    | 9.6 Not Detect   | Gm2511        | 3.310344828 | 7.62068966 | 2.90909091 | 6.6969697 |
| A_55_P2120 | 2.9 Not Detect   | 3.3 Not Detect   | 17.3 Detected    | 9.6 Not Detect   | Dab1          | 3.310344828 | 5.96551724 | 2.90909091 | 5.2424242 |
| A_55_P2161 | 2.9 Not Detect   | 21.6 Detected    | 42.8 Detected    | 9.6 Not Detect   | Acmsd         | 3.310344828 | 14.7586207 | 0.44444444 | 1.9814815 |
| A_55_P2065 | 2.9 Not Detect   | 27 Detected      | 3.4 Not Detect   | 9.6 Not Detect   | Ebf1          | 3.310344828 | 1.17241379 | 0.35555556 | 0.1259259 |
| A_52_P6501 | 2.9 Not Detect   | 47.4 Detected    | 3.5 Not Detect   | 9.6 Not Detect   | Nipal2        | 3.310344828 | 1.20689655 | 0.20253165 | 0.0738397 |
| A_55_P2157 | 2.9 Not Detect   | 51.4 Detected    | 3.4 Not Detect   | 9.6 Not Detect   | Igsf10        | 3.310344828 | 1.17241379 | 0.18677043 | 0.0661479 |
| A_51_P5168 | 2.9 Not Detect   | 335.4 Detected   | 3.5 Not Detect   | 9.6 Not Detect   | Itm2a         | 3.310344828 | 1.20689655 | 0.02862254 | 0.0104353 |
| A_55_P2160 | 5.5 Not Detect   | 33.7 Detected    | 11.7 Not Detect  | 18.2 Not Detect  | Olfm1         | 3.309090909 | 2.12727273 | 0.54005935 | 0.347181  |
| A_55_P2110 | 1549.4 Detected  | 2334.3 Detected  | 5032 Detected    | 5127 Detected    | Flrt3         | 3.309022848 | 3.24770879 | 2.19637579 | 2.1556784 |
| A_51_P2864 | 150.3 Detected   | 182 Detected     | 208.1 Detected   | 497.1 Detected   | Hist1h2ae     | 3.30738523  | 1.3845642  | 2.73131868 | 1.1434066 |
| A_52_P2558 | 1708.9 Detected  | 1811.7 Detected  | 2454.1 Detected  | 5649.9 Detected  | Fam57a        | 3.306161859 | 1.43606999 | 3.11856268 | 1.3545841 |
| A_55_P2295 | 744.7 Detected   | 1089.3 Detected  | 1806.1 Detected  | 2460.4 Detected  | 2210019I11Rik | 3.303880757 | 2.42527192 | 2.25869825 | 1.6580373 |
| A_51_P1496 | 67.3 Detected    | 98.4 Detected    | 83 Detected      | 222.2 Detected   | Gabrd         | 3.301634473 | 1.2332838  | 2.25813008 | 0.8434959 |
| A_55_P2022 | 3 Not Detect     | 3.5 Not Detect   | 21.8 Detected    | 9.9 Not Detect   | Scgb1b7       | 3.3         | 7.26666667 | 2.82857143 | 6.2285714 |
| A_51_P1228 | 3 Not Detect     | 3.5 Not Detect   | 20.6 Detected    | 9.9 Not Detect   | Pax5          | 3.3         | 6.86666667 | 2.82857143 | 5.8857143 |
| A_55_P1978 | 3 Not Detect     | 3.5 Not Detect   | 117.2 Detected   | 9.9 Not Detect   | 4930519F16Rik | 3.3         | 39.0666667 | 2.82857143 | 33.485714 |
| A_55_P2275 | 3 Not Detect     | 12 Not Detect    | 19.9 Detected    | 9.9 Not Detect   | A630012P03Rik | 3.3         | 6.63333333 | 0.825      | 1.6583333 |
| A_65_P0762 | 3 Not Detect     | 18.5 Detected    | 3.5 Not Detect   | 9.9 Not Detect   | Dach1         | 3.3         | 1.16666667 | 0.53513514 | 0.1891892 |
| A_55_P2033 | 3 Not Detect     | 26.1 Detected    | 3.5 Not Detect   | 9.9 Not Detect   | Shisa7        | 3.3         | 1.16666667 | 0.37931034 | 0.1340996 |
| A_51_P1461 | 3 Not Detect     | 26.4 Detected    | 9.7 Not Detect   | 9.9 Not Detect   | Napsa         | 3.3         | 3.23333333 | 0.375      | 0.3674242 |
| A_55_P2026 | 3 Not Detect     | 29.2 Detected    | 3.6 Not Detect   | 9.9 Not Detect   | Fam189a1      | 3.3         | 1.2        | 0.3390411  | 0.1232877 |
| A_52_P2204 | 3 Not Detect     | 56.5 Detected    | 3.5 Not Detect   | 9.9 Not Detect   | Slc6a15       | 3.3         | 1.16666667 | 0.17522124 | 0.0619469 |
| A_55_P2365 | 3 Not Detect     | 56.5 Detected    | 3.6 Not Detect   | 9.9 Not Detect   | LOC433198     | 3.3         | 1.2        | 0.17522124 | 0.0637168 |
| A_55_P1994 | 3 Not Detect     | 118.3 Detected   | 3.6 Not Detect   | 9.9 Not Detect   | Heph          | 3.3         | 1.2        | 0.08368555 | 0.0304311 |
| A_51_P3943 | 205.4 Detected   | 485.4 Detected   | 2087.8 Detected  | 677.2 Detected   | Tspan2        | 3.2969815   | 10.164557  | 1.39513803 | 4.3011949 |
| A_51_P4076 | 2.7 Not Detect   | 3.1 Not Detect   | 108.7 Detected   | 8.9 Not Detect   | Zrsr1         | 3.296296296 | 40.2592593 | 2.87096774 | 35.064516 |
| A_52_P4009 | 2.7 Not Detect   | 6 Not Detect     | 119.1 Detected   | 8.9 Not Detect   | Igkv8-16      | 3.296296296 | 44.1111111 | 1.48333333 | 19.85     |
| A_55_P2166 | 2.7 Not Detect   | 7.7 Not Detect   | 31.2 Detected    | 8.9 Not Detect   | H2-M1         | 3.296296296 | 11.5555556 | 1.15584416 | 4.0519481 |
| A_51_P1108 | 2.7 Not Detect   | 16.3 Detected    | 5.9 Not Detect   | 8.9 Not Detect   | Olfir926      | 3.296296296 | 2.18518519 | 0.54601227 | 0.3619632 |
| A_55_P1990 | 2.7 Not Detect   | 20.8 Detected    | 5.7 Not Detect   | 8.9 Not Detect   | Brinp3        | 3.296296296 | 2.11111111 | 0.42788462 | 0.2740385 |

|            |                 |                  |                  |                  |               |             |            |            |           |
|------------|-----------------|------------------|------------------|------------------|---------------|-------------|------------|------------|-----------|
| A_55_P2115 | 2.7 Not Detect  | 21.3 Detected    | 3.2 Not Detect   | 8.9 Not Detect   | Fap           | 3.296296296 | 1.18518519 | 0.41784038 | 0.1502347 |
| A_55_P2069 | 2.7 Not Detect  | 22 Detected      | 7.6 Not Detect   | 8.9 Not Detect   | Mapk10        | 3.296296296 | 2.81481481 | 0.40454545 | 0.3454545 |
| A_55_P2314 | 2.7 Not Detect  | 49.3 Detected    | 3.2 Not Detect   | 8.9 Not Detect   | 5430405H02Rik | 3.296296296 | 1.18518519 | 0.18052738 | 0.0649087 |
| A_51_P2471 | 2.7 Not Detect  | 70.4 Detected    | 3.2 Not Detect   | 8.9 Not Detect   | Npr3          | 3.296296296 | 1.18518519 | 0.12642045 | 0.0454545 |
| A_55_P1963 | 2.7 Not Detect  | 120.3 Detected   | 3.1 Not Detect   | 8.9 Not Detect   | Gabra3        | 3.296296296 | 1.14814815 | 0.07398171 | 0.0257689 |
| A_52_P2282 | 5560.1 Detected | 12555.2 Detected | 13727.6 Detected | 18306.2 Detected | Tfrc          | 3.292422798 | 2.4689484  | 1.45805722 | 1.0933796 |
| A_55_P1968 | 63.2 Detected   | 40 Detected      | 310.8 Detected   | 208 Detected     | LOC101055715  | 3.291139241 | 4.91772152 | 5.2        | 7.77      |
| A_55_P2092 | 3.1 Not Detect  | 9.7 Not Detect   | 18.8 Detected    | 10.2 Not Detect  | Il18r1        | 3.290322581 | 6.06451613 | 1.05154639 | 1.9381443 |
| A_66_P1349 | 11.4 Not Detect | 20.5 Detected    | 29 Detected      | 37.5 Not Detect  | Gm15441       | 3.289473684 | 2.54385965 | 1.82926829 | 1.4146341 |
| A_55_P1959 | 228.8 Detected  | 324.1 Detected   | 1153.5 Detected  | 752.5 Detected   | Fmo5          | 3.288898601 | 5.04152098 | 2.32181425 | 3.5590867 |
| A_55_P2138 | 13.5 Not Detect | 31.8 Detected    | 39.5 Detected    | 44.4 Not Detect  | Cyb5rl        | 3.288888889 | 2.92592593 | 1.39622642 | 1.2421384 |
| A_51_P2691 | 10.4 Not Detect | 22.3 Detected    | 24.4 Detected    | 34.2 Not Detect  | Sftpb         | 3.288461538 | 2.34615385 | 1.53363229 | 1.0941704 |
| A_55_P2045 | 308.7 Detected  | 196.9 Detected   | 1028.7 Detected  | 1014.6 Detected  | Hrh1          | 3.286686103 | 3.33236152 | 5.15286948 | 5.2244794 |
| A_66_P1401 | 2.8 Not Detect  | 3.2 Not Detect   | 18 Detected      | 9.2 Not Detect   | Itga4         | 3.285714286 | 6.42857143 | 2.875      | 5.625     |
| A_51_P2496 | 2.8 Not Detect  | 3.3 Not Detect   | 73.8 Detected    | 9.2 Not Detect   | Trdn          | 3.285714286 | 26.3571429 | 2.78787879 | 22.363636 |
| A_55_P2133 | 2.8 Not Detect  | 28.2 Detected    | 3.3 Not Detect   | 9.2 Not Detect   | Tas2r115      | 3.285714286 | 1.17857143 | 0.32624113 | 0.1170213 |
| A_55_P1959 | 2.8 Not Detect  | 68.4 Detected    | 3.3 Not Detect   | 9.2 Not Detect   | Dach1         | 3.285714286 | 1.17857143 | 0.13450292 | 0.0482456 |
| A_52_P7441 | 2.8 Not Detect  | 72.1 Detected    | 3.3 Not Detect   | 9.2 Not Detect   | Xirp2         | 3.285714286 | 1.17857143 | 0.12760055 | 0.0457698 |
| A_55_P2170 | 271.2 Detected  | 876.9 Detected   | 1050.4 Detected  | 889.8 Detected   | Ap1s3         | 3.280973451 | 3.87315634 | 1.01471091 | 1.1978561 |
| A_51_P5005 | 627.1 Detected  | 1964.9 Detected  | 1743.4 Detected  | 2057.2 Detected  | Flywch2       | 3.280497528 | 2.78009887 | 1.0469744  | 0.8872716 |
| A_55_P2084 | 2.9 Not Detect  | 24.1 Detected    | 5.8 Not Detect   | 9.5 Not Detect   | Rarb          | 3.275862069 | 2          | 0.39419087 | 0.2406639 |
| A_51_P3762 | 2.9 Not Detect  | 77.2 Detected    | 3.4 Not Detect   | 9.5 Not Detect   | Serping1      | 3.275862069 | 1.17241379 | 0.12305699 | 0.0440415 |
| A_55_P1956 | 2.9 Not Detect  | 106.5 Detected   | 3.4 Not Detect   | 9.5 Not Detect   | Dach2         | 3.275862069 | 1.17241379 | 0.08920188 | 0.0319249 |
| A_55_P2129 | 2.9 Not Detect  | 184.5 Detected   | 3.4 Not Detect   | 9.5 Not Detect   | Cypr1         | 3.275862069 | 1.17241379 | 0.05149051 | 0.0184282 |
| A_55_P2277 | 16.4 Detected   | 24 Detected      | 17.1 Not Detect  | 53.7 Detected    | Dnah1         | 3.274390244 | 1.04268293 | 2.2375     | 0.7125    |
| A_51_P1756 | 2619.1 Detected | 7345.1 Detected  | 5898.7 Detected  | 8567.5 Detected  | Mtfp1         | 3.271161849 | 2.25218587 | 1.16642387 | 0.8030796 |
| A_55_P2140 | 624.5 Detected  | 952.4 Detected   | 1132.1 Detected  | 2041.7 Detected  | Krt32         | 3.269335468 | 1.81281025 | 2.14374213 | 1.1886812 |
| A_51_P1878 | 3 Not Detect    | 31.8 Detected    | 3.5 Not Detect   | 9.8 Not Detect   | Eif4e3        | 3.266666667 | 1.16666667 | 0.3081761  | 0.1100629 |
| A_52_P1546 | 52.1 Detected   | 45.7 Detected    | 112.9 Detected   | 170.1 Detected   | Il15          | 3.26487524  | 2.16698656 | 3.72210066 | 2.4704595 |
| A_55_P2060 | 9.1 Not Detect  | 17.8 Detected    | 14.5 Not Detect  | 29.7 Not Detect  | Mtl5          | 3.263736264 | 1.59340659 | 1.66853933 | 0.8146067 |
| A_55_P1971 | 2.7 Not Detect  | 3.1 Not Detect   | 19 Detected      | 8.8 Not Detect   | Slx1l         | 3.259259259 | 7.03703704 | 2.83870968 | 6.1290323 |
| A_55_P2094 | 2.7 Not Detect  | 3.1 Not Detect   | 49.5 Detected    | 8.8 Not Detect   | Ocm           | 3.259259259 | 18.3333333 | 2.83870968 | 15.967742 |
| A_51_P1419 | 2.7 Not Detect  | 17.2 Detected    | 4.1 Not Detect   | 8.8 Not Detect   | Fxyd4         | 3.259259259 | 1.51851852 | 0.51162791 | 0.2383721 |
| A_55_P2170 | 2.7 Not Detect  | 20.5 Detected    | 3.1 Not Detect   | 8.8 Not Detect   | Olf1153       | 3.259259259 | 1.14814815 | 0.42926829 | 0.1512195 |
| A_52_P2936 | 2.7 Not Detect  | 24.3 Detected    | 3.2 Not Detect   | 8.8 Not Detect   | Sult2a7       | 3.259259259 | 1.18518519 | 0.36213992 | 0.1316872 |
| A_55_P2176 | 2.7 Not Detect  | 57.6 Detected    | 3.2 Not Detect   | 8.8 Not Detect   | Cyp2j5        | 3.259259259 | 1.18518519 | 0.15277778 | 0.0555556 |
| A_55_P2120 | 2.7 Not Detect  | 253.7 Detected   | 4.3 Not Detect   | 8.8 Not Detect   | Cldn24        | 3.259259259 | 1.59259259 | 0.03468664 | 0.0169492 |
| A_55_P1957 | 30.5 Detected   | 25.8 Detected    | 77.6 Detected    | 99.4 Detected    | Gm3161        | 3.259016393 | 2.5442623  | 3.85271318 | 3.0077519 |
| A_51_P2696 | 30.2 Detected   | 47.4 Detected    | 63.7 Detected    | 98.4 Detected    | Zfp14         | 3.258278146 | 2.10927152 | 2.07594937 | 1.3438819 |
| A_51_P3646 | 309 Detected    | 266.4 Detected   | 133.6 Detected   | 1006.5 Detected  | Rnf32         | 3.257281553 | 0.43236246 | 3.77815315 | 0.5015015 |



|            |                 |                 |                  |                  |               |             |            |            |           |
|------------|-----------------|-----------------|------------------|------------------|---------------|-------------|------------|------------|-----------|
| A_66_P1018 | 139.4 Detected  | 149.7 Detected  | 152.1 Detected   | 453.6 Detected   | Chrna4        | 3.253945481 | 1.09110473 | 3.03006012 | 1.0160321 |
| A_55_P2181 | 1591.9 Detected | 1569.5 Detected | 3160.2 Detected  | 5179.6 Detected  | Bdh1          | 3.253721967 | 1.98517495 | 3.30015929 | 2.0135075 |
| A_51_P2750 | 205.6 Detected  | 639 Detected    | 655.5 Detected   | 668.7 Detected   | Spaca7        | 3.252431907 | 3.18822957 | 1.04647887 | 1.0258216 |
| A_55_P2056 | 6.8 Not Detect  | 15.6 Detected   | 15.4 Not Detect  | 22.1 Not Detect  | Lymr7         | 3.25        | 2.26470588 | 1.41666667 | 0.9871795 |
| A_51_P4493 | 2.8 Not Detect  | 3.2 Not Detect  | 27.7 Detected    | 9.1 Not Detect   | H2-Oa         | 3.25        | 9.89285714 | 2.84375    | 8.65625   |
| A_55_P1954 | 2.8 Not Detect  | 3.2 Not Detect  | 25.2 Detected    | 9.1 Not Detect   | Gm21637       | 3.25        | 9          | 2.84375    | 7.875     |
| A_55_P2294 | 2.8 Not Detect  | 3.2 Not Detect  | 455.6 Detected   | 9.1 Not Detect   | 2810030D12Rik | 3.25        | 162.714286 | 2.84375    | 142.375   |
| A_52_P7457 | 2.8 Not Detect  | 20.1 Detected   | 3.3 Not Detect   | 9.1 Not Detect   | Ccdc65        | 3.25        | 1.17857143 | 0.45273632 | 0.1641791 |
| A_51_P3895 | 2.8 Not Detect  | 22.9 Detected   | 3.3 Not Detect   | 9.1 Not Detect   | Gpr98         | 3.25        | 1.17857143 | 0.39737991 | 0.1441048 |
| A_55_P2167 | 2.8 Not Detect  | 37.9 Detected   | 3.3 Not Detect   | 9.1 Not Detect   | Scube3        | 3.25        | 1.17857143 | 0.24010554 | 0.0870712 |
| A_55_P1966 | 2.8 Not Detect  | 41.8 Detected   | 3.3 Not Detect   | 9.1 Not Detect   | Trpc6         | 3.25        | 1.17857143 | 0.21770335 | 0.0789474 |
| A_51_P4614 | 2.8 Not Detect  | 247.2 Detected  | 3.3 Not Detect   | 9.1 Not Detect   | Cyp7b1        | 3.25        | 1.17857143 | 0.0368123  | 0.0133495 |
| A_55_P1976 | 427.3 Detected  | 1230.9 Detected | 259.3 Detected   | 1386.8 Detected  | Ckb           | 3.245494968 | 0.60683361 | 1.12665529 | 0.2106589 |
| A_51_P1091 | 1699.2 Detected | 1624.5 Detected | 3022.3 Detected  | 5512.5 Detected  | Grtp1         | 3.244173729 | 1.77866055 | 3.3933518  | 1.8604494 |
| A_55_P2120 | 4.1 Not Detect  | 19 Detected     | 15.9 Not Detect  | 13.3 Not Detect  | Rad51b        | 3.243902439 | 3.87804878 | 0.7        | 0.8368421 |
| A_51_P1134 | 386.3 Detected  | 669.1 Detected  | 655.8 Detected   | 1252.3 Detected  | Slc26a11      | 3.241780999 | 1.69764432 | 1.87161859 | 0.9801226 |
| A_52_P1161 | 220.9 Detected  | 224.2 Detected  | 413.7 Detected   | 716.1 Detected   | Coro2a        | 3.241738343 | 1.87279312 | 3.19402319 | 1.8452275 |
| A_51_P3408 | 2.9 Not Detect  | 3.3 Not Detect  | 18.7 Detected    | 9.4 Not Detect   | Zkscan4       | 3.24137931  | 6.44827586 | 2.84848485 | 5.6666667 |
| A_55_P2125 | 2.9 Not Detect  | 3.3 Not Detect  | 22.8 Detected    | 9.4 Not Detect   | Celf2         | 3.24137931  | 7.86206897 | 2.84848485 | 6.9090909 |
| A_52_P6474 | 2.9 Not Detect  | 28.7 Detected   | 3.4 Not Detect   | 9.4 Not Detect   | Gspt2         | 3.24137931  | 1.17241379 | 0.32752613 | 0.1184669 |
| A_55_P2138 | 2.9 Not Detect  | 29.2 Detected   | 3.4 Not Detect   | 9.4 Not Detect   | Sgcd          | 3.24137931  | 1.17241379 | 0.32191781 | 0.1164384 |
| A_51_P3503 | 353.4 Detected  | 556.7 Detected  | 853.1 Detected   | 1144.8 Detected  | Rbpms         | 3.239388795 | 2.41397849 | 2.05640381 | 1.5324232 |
| A_55_P2088 | 801.7 Detected  | 1156.8 Detected | 1381.2 Detected  | 2596.5 Detected  | Arrdc2        | 3.238742672 | 1.72283897 | 2.24455394 | 1.1939834 |
| A_55_P2136 | 131.1 Detected  | 255.8 Detected  | 335.7 Detected   | 424.4 Detected   | Heca          | 3.237223494 | 2.56064073 | 1.65910868 | 1.3123534 |
| A_66_P1405 | 15 Detected     | 46.8 Detected   | 42.9 Detected    | 48.5 Not Detect  | A630076J17Rik | 3.233333333 | 2.86       | 1.03632479 | 0.9166667 |
| A_55_P2330 | 3 Not Detect    | 3.7 Not Detect  | 78.1 Detected    | 9.7 Not Detect   | Olf947-ps1    | 3.233333333 | 26.0333333 | 2.62162162 | 21.108108 |
| A_55_P2074 | 3083.8 Detected | 2945.3 Detected | 26129.5 Detected | 9965.9 Detected  | Adap1         | 3.231694662 | 8.47315001 | 3.38366211 | 8.871592  |
| A_55_P2415 | 357.2 Detected  | 470.1 Detected  | 795 Detected     | 1154.3 Detected  | 2810013P06Rik | 3.231522956 | 2.2256439  | 2.45543501 | 1.6911295 |
| A_55_P2034 | 2.6 Not Detect  | 2.9 Not Detect  | 64.7 Detected    | 8.4 Not Detect   | Gm6145        | 3.230769231 | 24.8846154 | 2.89655172 | 22.310345 |
| A_55_P2417 | 2.6 Not Detect  | 2.9 Not Detect  | 30.3 Detected    | 8.4 Not Detect   | E130215H24Rik | 3.230769231 | 11.6538462 | 2.89655172 | 10.448276 |
| A_51_P3523 | 2.6 Not Detect  | 22.4 Detected   | 3 Not Detect     | 8.4 Not Detect   | Homer2        | 3.230769231 | 1.15384615 | 0.375      | 0.1339286 |
| A_55_P2132 | 2.6 Not Detect  | 23.2 Detected   | 3 Not Detect     | 8.4 Not Detect   | Gm5532        | 3.230769231 | 1.15384615 | 0.36206897 | 0.1293103 |
| A_55_P1991 | 540 Detected    | 1122.7 Detected | 805.5 Detected   | 1744 Detected    | Fbxo24        | 3.22962963  | 1.49166667 | 1.55339806 | 0.7174668 |
| A_55_P2076 | 9.2 Not Detect  | 20.1 Detected   | 3.5 Not Detect   | 29.7 Not Detect  | Tmem255a      | 3.22826087  | 0.38043478 | 1.47761194 | 0.1741294 |
| A_55_P1973 | 6057.7 Detected | 4783.2 Detected | 12362.7 Detected | 19539.8 Detected | Slc6a9        | 3.225613682 | 2.04082408 | 4.08508948 | 2.5846086 |
| A_51_P2491 | 1601.2 Detected | 4464.2 Detected | 5788.7 Detected  | 5162 Detected    | Abcb4         | 3.223832126 | 3.61522608 | 1.1563102  | 1.2966937 |
| A_51_P4267 | 4250.4 Detected | 3706.7 Detected | 14303.4 Detected | 13700.3 Detected | Gpt           | 3.223296631 | 3.36518916 | 3.69609086 | 3.8587962 |
| A_55_P1994 | 2.7 Not Detect  | 3 Not Detect    | 16.5 Detected    | 8.7 Not Detect   | Sowahd        | 3.222222222 | 6.11111111 | 2.9        | 5.5       |
| A_55_P2123 | 2.7 Not Detect  | 3 Not Detect    | 88.6 Detected    | 8.7 Not Detect   | Olf9553       | 3.222222222 | 32.8148148 | 2.9        | 29.533333 |
| A_55_P2270 | 2.7 Not Detect  | 3 Not Detect    | 21.2 Detected    | 8.7 Not Detect   | Gm10441       | 3.222222222 | 7.85185185 | 2.9        | 7.0666667 |

|            |                 |                 |                 |                 |               |             |            |            |           |
|------------|-----------------|-----------------|-----------------|-----------------|---------------|-------------|------------|------------|-----------|
| A_55_P2015 | 2.7 Not Detect  | 10.8 Not Detect | 43.1 Detected   | 8.7 Not Detect  | Clec2f        | 3.22222222  | 15.962963  | 0.80555556 | 3.9907407 |
| A_52_P6755 | 2.7 Not Detect  | 16.2 Detected   | 3.1 Not Detect  | 8.7 Not Detect  | Fat4          | 3.22222222  | 1.14814815 | 0.53703704 | 0.191358  |
| A_55_P2002 | 2.7 Not Detect  | 18 Detected     | 3.1 Not Detect  | 8.7 Not Detect  | Tmem74b       | 3.22222222  | 1.14814815 | 0.48333333 | 0.1722222 |
| A_55_P2017 | 2.7 Not Detect  | 18.7 Detected   | 13 Not Detect   | 8.7 Not Detect  | Gm4788        | 3.22222222  | 4.81481481 | 0.46524064 | 0.6951872 |
| A_55_P2044 | 2.7 Not Detect  | 28.5 Detected   | 3.1 Not Detect  | 8.7 Not Detect  | Gpr87         | 3.22222222  | 1.14814815 | 0.30526316 | 0.1087719 |
| A_55_P1953 | 2.7 Not Detect  | 78 Detected     | 3.1 Not Detect  | 8.7 Not Detect  | Stk39         | 3.22222222  | 1.14814815 | 0.11153846 | 0.0397436 |
| A_55_P2056 | 2.7 Not Detect  | 186.6 Detected  | 20.4 Detected   | 8.7 Not Detect  | Snap91        | 3.22222222  | 7.55555556 | 0.04662379 | 0.1093248 |
| A_51_P1859 | 1176.1 Detected | 1518.3 Detected | 1833.8 Detected | 3787.1 Detected | Abi3          | 3.220049316 | 1.55922115 | 2.49430284 | 1.2077982 |
| A_51_P1470 | 19.1 Detected   | 26.3 Detected   | 61.7 Detected   | 61.5 Detected   | 1600014C23Rik | 3.219895288 | 3.23036649 | 2.33840304 | 2.3460076 |
| A_66_P1306 | 32.8 Detected   | 109 Detected    | 39.9 Detected   | 105.6 Detected  | Abcg4         | 3.219512195 | 1.21646341 | 0.96880734 | 0.366055  |
| A_55_P2176 | 3.2 Not Detect  | 38.5 Detected   | 3.7 Not Detect  | 10.3 Not Detect | Prkar1b       | 3.21875     | 1.15625    | 0.26753247 | 0.0961039 |
| A_55_P2063 | 11.9 Not Detect | 16.7 Not Detect | 20.5 Detected   | 38.3 Not Detect | Inadl         | 3.218487395 | 1.72268908 | 2.29341317 | 1.2275449 |
| A_55_P1964 | 276.8 Detected  | 352.7 Detected  | 210.2 Detected  | 890.5 Detected  | 1110051M20Rik | 3.217124277 | 0.75939306 | 2.52480862 | 0.5959739 |
| A_55_P2172 | 2876.7 Detected | 3328.9 Detected | 2123.1 Detected | 9251.7 Detected | Cnih2         | 3.216080926 | 0.73803316 | 2.77920634 | 0.6377782 |
| A_55_P2055 | 2.8 Not Detect  | 3.2 Not Detect  | 17.4 Detected   | 9 Not Detect    | Lrrc69        | 3.214285714 | 6.21428571 | 2.8125     | 5.4375    |
| A_55_P2143 | 2.8 Not Detect  | 3.2 Not Detect  | 195.1 Detected  | 9 Not Detect    | Defa-ps13     | 3.214285714 | 69.6785714 | 2.8125     | 60.96875  |
| A_55_P2104 | 76 Detected     | 48.5 Detected   | 46.6 Detected   | 244 Detected    | Pisd-ps2      | 3.210526316 | 0.61315789 | 5.03092784 | 0.9608247 |
| A_55_P2030 | 89.9 Detected   | 108.3 Detected  | 373.9 Detected  | 288.6 Detected  | Dusp13        | 3.210233593 | 4.15906563 | 2.66481994 | 3.4524469 |
| A_51_P3636 | 277.9 Detected  | 404.9 Detected  | 254.1 Detected  | 891.5 Detected  | 1700088E04Rik | 3.207988485 | 0.91435768 | 2.20177822 | 0.6275624 |
| A_51_P4460 | 18.3 Detected   | 18.6 Detected   | 21 Detected     | 58.7 Detected   | Scd3          | 3.207650273 | 1.14754098 | 3.15591398 | 1.1290323 |
| A_55_P2129 | 138.6 Detected  | 126.6 Detected  | 164.9 Detected  | 444.5 Detected  | LOC101056661  | 3.207070707 | 1.18975469 | 3.51105845 | 1.3025276 |
| A_55_P2346 | 2.9 Not Detect  | 3.3 Not Detect  | 18 Detected     | 9.3 Not Detect  | C730037M02Rik | 3.206896552 | 6.20689655 | 2.81818182 | 5.4545455 |
| A_51_P3562 | 59.1 Detected   | 53.1 Detected   | 87.5 Detected   | 189.4 Detected  | Acrbp         | 3.204737733 | 1.48054146 | 3.56685499 | 1.6478343 |
| A_52_P5227 | 416.2 Detected  | 673.4 Detected  | 486.1 Detected  | 1333.1 Detected | Ebna1bp2      | 3.203027391 | 1.1679481  | 1.97965548 | 0.7218592 |
| A_55_P2115 | 6 Not Detect    | 11.9 Not Detect | 39.4 Detected   | 19.2 Not Detect | Mst1          | 3.2         | 6.56666667 | 1.61344538 | 3.3109244 |
| A_52_P6256 | 983.9 Detected  | 1032.7 Detected | 2850.4 Detected | 3145.7 Detected | Pxmp4         | 3.19717451  | 2.89704238 | 3.04609277 | 2.7601433 |
| A_52_P1121 | 122.6 Detected  | 224.6 Detected  | 554.3 Detected  | 391.9 Detected  | Tmem82        | 3.196574225 | 4.52120718 | 1.74487979 | 2.467943  |
| A_51_P4010 | 117 Detected    | 116.3 Detected  | 225.4 Detected  | 373.9 Detected  | 1600016N20Rik | 3.195726496 | 1.92649573 | 3.21496131 | 1.9380911 |
| A_55_P1989 | 15.9 Detected   | 16.2 Not Detect | 35.2 Detected   | 50.8 Detected   | Lphn2         | 3.194968553 | 2.21383648 | 3.13580247 | 2.1728395 |
| A_52_P2237 | 54.4 Detected   | 93.8 Detected   | 74.3 Detected   | 173.8 Detected  | Faah          | 3.194852941 | 1.36580882 | 1.85287846 | 0.7921109 |
| A_52_P1495 | 8.3 Not Detect  | 20.5 Detected   | 15.6 Not Detect | 26.5 Not Detect | Rab25         | 3.192771084 | 1.87951807 | 1.29268293 | 0.7609756 |
| A_51_P3575 | 830.6 Detected  | 1114.6 Detected | 1372 Detected   | 2651.8 Detected | Fbxw9         | 3.192631832 | 1.65181796 | 2.37914947 | 1.2309349 |
| A_55_P1964 | 2.6 Not Detect  | 2.9 Not Detect  | 19.5 Detected   | 8.3 Not Detect  | Lrrc43        | 3.192307692 | 7.5        | 2.86206897 | 6.7241379 |
| A_52_P3548 | 2.6 Not Detect  | 2.9 Not Detect  | 27.2 Detected   | 8.3 Not Detect  | Irf8          | 3.192307692 | 10.4615385 | 2.86206897 | 9.3793103 |
| A_55_P2026 | 2.6 Not Detect  | 2.9 Not Detect  | 22.1 Detected   | 8.3 Not Detect  | Foxb2         | 3.192307692 | 8.5        | 2.86206897 | 7.6206897 |
| A_55_P2171 | 2.6 Not Detect  | 14.9 Detected   | 3 Not Detect    | 8.3 Not Detect  | Gm2483        | 3.192307692 | 1.15384615 | 0.55704698 | 0.2013423 |
| A_52_P3877 | 2.6 Not Detect  | 31.5 Detected   | 9.2 Not Detect  | 8.3 Not Detect  | Tcf7l1        | 3.192307692 | 3.53846154 | 0.26349206 | 0.2920635 |
| A_55_P2015 | 1348.3 Detected | 2610.5 Detected | 1711.2 Detected | 4300.1 Detected | Kazald1       | 3.189275384 | 1.26915375 | 1.64723233 | 0.6555066 |
| A_55_P2096 | 1751.9 Detected | 4000.8 Detected | 1683.5 Detected | 5584.9 Detected | Arhgdig       | 3.187910269 | 0.96095668 | 1.39594581 | 0.4207908 |
| A_51_P1720 | 2364.6 Detected | 5552 Detected   | 2352.6 Detected | 7531.7 Detected | Arhgdig       | 3.185189884 | 0.99492515 | 1.35657421 | 0.4237392 |

|            |                  |                  |                  |                  |               |             |            |            |           |
|------------|------------------|------------------|------------------|------------------|---------------|-------------|------------|------------|-----------|
| A_55_P2133 | 2.7 Not Detect   | 3 Not Detect     | 20.8 Detected    | 8.6 Not Detect   | Olf672        | 3.185185185 | 7.7037037  | 2.86666667 | 6.9333333 |
| A_55_P2173 | 2.7 Not Detect   | 3 Not Detect     | 154 Detected     | 8.6 Not Detect   | Gm7616        | 3.185185185 | 57.037037  | 2.86666667 | 51.333333 |
| A_52_P3990 | 2.7 Not Detect   | 3 Not Detect     | 62 Detected      | 8.6 Not Detect   | Ankrd34b      | 3.185185185 | 22.962963  | 2.86666667 | 20.666667 |
| A_55_P2284 | 2.7 Not Detect   | 3 Not Detect     | 17.4 Detected    | 8.6 Not Detect   | A430085C19    | 3.185185185 | 6.44444444 | 2.86666667 | 5.8       |
| A_55_P2190 | 2.7 Not Detect   | 3 Not Detect     | 59.7 Detected    | 8.6 Not Detect   | 4930579H2ORik | 3.185185185 | 22.1111111 | 2.86666667 | 19.9      |
| A_55_P2007 | 2.7 Not Detect   | 5.4 Not Detect   | 26.1 Detected    | 8.6 Not Detect   | Sftpd         | 3.185185185 | 9.66666667 | 1.59259259 | 4.8333333 |
| A_55_P2057 | 2.7 Not Detect   | 53.1 Detected    | 3.1 Not Detect   | 8.6 Not Detect   | Cdyl2         | 3.185185185 | 1.14814815 | 0.16195857 | 0.0583804 |
| A_52_P1561 | 2.7 Not Detect   | 67.6 Detected    | 3.1 Not Detect   | 8.6 Not Detect   | Ednra         | 3.185185185 | 1.14814815 | 0.12721893 | 0.045858  |
| A_55_P1961 | 2.7 Not Detect   | 88.7 Detected    | 3.1 Not Detect   | 8.6 Not Detect   | Plagl1        | 3.185185185 | 1.14814815 | 0.09695603 | 0.0349493 |
| A_55_P1962 | 2.7 Not Detect   | 157.6 Detected   | 3.1 Not Detect   | 8.6 Not Detect   | Rarb          | 3.185185185 | 1.14814815 | 0.05456853 | 0.0196701 |
| A_55_P1961 | 82.4 Detected    | 233 Detected     | 116.8 Detected   | 262.4 Detected   | Cryl1         | 3.184466019 | 1.41747573 | 1.12618026 | 0.5012876 |
| A_55_P2062 | 60.1 Detected    | 99.3 Detected    | 80.5 Detected    | 191.2 Detected   | 2900041M22Rik | 3.181364393 | 1.33943428 | 1.92547835 | 0.8106747 |
| A_65_P0371 | 179.2 Detected   | 261.7 Detected   | 510.4 Detected   | 570 Detected     | Fuca2         | 3.180803571 | 2.84821429 | 2.17806649 | 1.9503248 |
| A_51_P1712 | 39.3 Detected    | 296.1 Detected   | 20.4 Detected    | 125 Detected     | Gli3          | 3.180661578 | 0.51908397 | 0.42215468 | 0.0688956 |
| A_55_P2092 | 387.7 Detected   | 1062.3 Detected  | 909.6 Detected   | 1232.5 Detected  | Anxa9         | 3.179004385 | 2.34614393 | 1.16021839 | 0.8562553 |
| A_55_P2118 | 64.3 Detected    | 218.5 Detected   | 145.3 Detected   | 204.4 Detected   | Zfp882        | 3.178849145 | 2.25972006 | 0.93546911 | 0.6649886 |
| A_55_P2075 | 2.8 Not Detect   | 3.4 Not Detect   | 19.4 Detected    | 8.9 Not Detect   | Ttl9          | 3.178571429 | 6.92857143 | 2.61764706 | 5.7058824 |
| A_51_P4102 | 2.8 Not Detect   | 16.6 Detected    | 11.7 Not Detect  | 8.9 Not Detect   | Hsd11b2       | 3.178571429 | 4.17857143 | 0.53614458 | 0.7048193 |
| A_55_P2173 | 3.4 Not Detect   | 14.7 Detected    | 4.9 Not Detect   | 10.8 Not Detect  | Plcb4         | 3.176470588 | 1.44117647 | 0.73469388 | 0.3333333 |
| A_51_P5096 | 87.5 Detected    | 84.3 Detected    | 76 Detected      | 277.8 Detected   | Snca          | 3.174857143 | 0.86857143 | 3.29537367 | 0.9015421 |
| A_55_P2071 | 5.8 Not Detect   | 15.1 Detected    | 7.9 Not Detect   | 18.4 Not Detect  | Adam19        | 3.172413793 | 1.36206897 | 1.21854305 | 0.5231788 |
| A_51_P4699 | 103.8 Detected   | 2146.3 Detected  | 110.2 Detected   | 329.2 Detected   | Srgap3        | 3.171483622 | 1.06165703 | 0.15338024 | 0.0513442 |
| A_55_P2011 | 104.6 Detected   | 504.7 Detected   | 1580.7 Detected  | 331.5 Detected   | Pdzk1ip1      | 3.169216061 | 15.1118547 | 0.65682584 | 3.1319596 |
| A_55_P2221 | 20.8 Detected    | 27.2 Detected    | 19.4 Detected    | 65.9 Detected    | AW493563      | 3.168269231 | 0.93269231 | 2.42279412 | 0.7132353 |
| A_55_P2148 | 1467.9 Detected  | 2233.8 Detected  | 2723.6 Detected  | 4648.6 Detected  | Tmem79        | 3.166836978 | 1.85543974 | 2.08102784 | 1.2192676 |
| A_55_P2063 | 17 Detected      | 15.3 Not Detect  | 25.4 Detected    | 53.8 Detected    | Gm4131        | 3.164705882 | 1.49411765 | 3.51633987 | 1.6601307 |
| A_52_P4967 | 8.6 Not Detect   | 228.5 Detected   | 30.7 Detected    | 27.2 Not Detect  | Papolg        | 3.162790698 | 3.56976744 | 0.1190372  | 0.1343545 |
| A_51_P1067 | 14451.9 Detected | 17469.4 Detected | 24429.5 Detected | 45688.4 Detected | Pparg         | 3.161411302 | 1.69040057 | 2.61533882 | 1.3984167 |
| A_55_P2035 | 3.1 Not Detect   | 160.3 Detected   | 3.4 Not Detect   | 9.8 Not Detect   | Fzd8          | 3.161290323 | 1.09677419 | 0.06113537 | 0.0212102 |
| A_52_P4238 | 179.9 Detected   | 261.3 Detected   | 218.1 Detected   | 568.6 Detected   | Mt1           | 3.160644803 | 1.21234019 | 2.17604286 | 0.8346728 |
| A_51_P4801 | 1589.7 Detected  | 3167.1 Detected  | 2191.9 Detected  | 5022.3 Detected  | Prelid2       | 3.159275335 | 1.37881361 | 1.58577247 | 0.6920842 |
| A_55_P2036 | 5.7 Not Detect   | 85.5 Detected    | 3.3 Not Detect   | 18 Not Detect    | Rai2          | 3.157894737 | 0.57894737 | 0.21052632 | 0.0385965 |
| A_55_P2317 | 21 Detected      | 19.5 Detected    | 15.6 Not Detect  | 66.3 Detected    | C030013C21Rik | 3.157142857 | 0.74285714 | 3.4        | 0.8       |
| A_51_P3229 | 351.5 Detected   | 279.3 Detected   | 815.3 Detected   | 1109.4 Detected  | Hkdc1         | 3.156187767 | 2.31948791 | 3.97207304 | 2.9190834 |
| A_55_P2091 | 33.5 Detected    | 37.6 Detected    | 38.3 Detected    | 105.7 Detected   | C330011M18Rik | 3.155223881 | 1.14328358 | 2.81117021 | 1.018617  |
| A_51_P2011 | 15.5 Detected    | 14.3 Not Detect  | 9.6 Not Detect   | 48.9 Detected    | Lipf          | 3.15483871  | 0.61935484 | 3.41958042 | 0.6713287 |
| A_55_P2036 | 28.5 Detected    | 34.9 Detected    | 107.1 Detected   | 89.9 Detected    | Dusp13        | 3.154385965 | 3.75789474 | 2.57593123 | 3.0687679 |
| A_55_P2106 | 9852.3 Detected  | 16562.5 Detected | 23064.9 Detected | 31074.2 Detected | Trappc6a      | 3.154004649 | 2.34106757 | 1.87617811 | 1.3925977 |
| A_55_P2029 | 2.6 Not Detect   | 18.8 Detected    | 7.3 Not Detect   | 8.2 Not Detect   | Glt6d1        | 3.153846154 | 2.80769231 | 0.43617021 | 0.3882979 |
| A_55_P2092 | 23806.5 Detected | 25390.4 Detected | 93688.7 Detected | 75065.2 Detected | Anxa4         | 3.153138849 | 3.9354252  | 2.95644023 | 3.6899261 |

|            |                 |                  |                  |                  |               |             |            |            |           |
|------------|-----------------|------------------|------------------|------------------|---------------|-------------|------------|------------|-----------|
| A_55_P2086 | 46.6 Detected   | 56.6 Detected    | 74.9 Detected    | 146.9 Detected   | Sp140         | 3.152360515 | 1.60729614 | 2.59540636 | 1.3233216 |
| A_55_P2131 | 541.4 Detected  | 705.3 Detected   | 501.4 Detected   | 1706.6 Detected  | Vwa5a         | 3.152198005 | 0.92611747 | 2.41967957 | 0.7109032 |
| A_55_P2202 | 2.7 Not Detect  | 3 Not Detect     | 25.7 Detected    | 8.5 Not Detect   | 4933439G12Rik | 3.148148148 | 9.51851852 | 2.83333333 | 8.5666667 |
| A_51_P1471 | 2.7 Not Detect  | 17.8 Detected    | 3.1 Not Detect   | 8.5 Not Detect   | Ntn1          | 3.148148148 | 1.14814815 | 0.47752809 | 0.1741573 |
| A_51_P2354 | 2.7 Not Detect  | 20.6 Detected    | 3.1 Not Detect   | 8.5 Not Detect   | Olfm2         | 3.148148148 | 1.14814815 | 0.41262136 | 0.1504854 |
| A_51_P4262 | 2.7 Not Detect  | 49.6 Detected    | 3.1 Not Detect   | 8.5 Not Detect   | Mgp           | 3.148148148 | 1.14814815 | 0.17137097 | 0.0625    |
| A_51_P1472 | 2.7 Not Detect  | 132.6 Detected   | 3.1 Not Detect   | 8.5 Not Detect   | Slain1        | 3.148148148 | 1.14814815 | 0.06410256 | 0.0233786 |
| A_55_P1994 | 132.4 Detected  | 151.2 Detected   | 201.5 Detected   | 416.8 Detected   | Catsper4      | 3.148036254 | 1.52190332 | 2.75661376 | 1.332672  |
| A_55_P1990 | 2.8 Not Detect  | 3.1 Not Detect   | 98.7 Detected    | 8.8 Not Detect   | Gm20877       | 3.142857143 | 35.25      | 2.83870968 | 31.83871  |
| A_55_P2032 | 342 Detected    | 1006.2 Detected  | 324.1 Detected   | 1074.2 Detected  | Trim2         | 3.140935673 | 0.94766082 | 1.067581   | 0.322103  |
| A_55_P2181 | 137.3 Detected  | 235.1 Detected   | 364.8 Detected   | 430.7 Detected   | Gm4129        | 3.136926438 | 2.65695557 | 1.83198639 | 1.5516801 |
| A_55_P2162 | 11.8 Not Detect | 23.8 Detected    | 12 Not Detect    | 37 Not Detect    | D630029K05Rik | 3.13559322  | 1.01694915 | 1.55462185 | 0.5042017 |
| A_66_P1138 | 4487.9 Detected | 2536.9 Detected  | 11663.1 Detected | 14071.1 Detected | Smim6         | 3.135341697 | 2.59878785 | 5.54657259 | 4.5973826 |
| A_55_P2096 | 28.1 Detected   | 85.3 Detected    | 53.4 Detected    | 88.1 Detected    | Nrn1l         | 3.135231317 | 1.90035587 | 1.03282532 | 0.6260258 |
| A_55_P2099 | 3 Not Detect    | 32.6 Detected    | 20.1 Detected    | 9.4 Not Detect   | Lrp2          | 3.133333333 | 6.7        | 0.28834356 | 0.6165644 |
| A_51_P2043 | 66.8 Detected   | 152.2 Detected   | 282.2 Detected   | 209.1 Detected   | Krt33a        | 3.130239521 | 4.2245509  | 1.3738502  | 1.8541393 |
| A_55_P2185 | 250.3 Detected  | 136.8 Detected   | 561.6 Detected   | 781.7 Detected   | Cyp3a13       | 3.123052337 | 2.24370755 | 5.71418129 | 4.1052632 |
| A_51_P4154 | 2343.9 Detected | 2788.8 Detected  | 2980.3 Detected  | 7317.3 Detected  | Dok4          | 3.121848202 | 1.27151329 | 2.6238167  | 1.0686675 |
| A_55_P2143 | 3.3 Not Detect  | 5.6 Not Detect   | 27.1 Detected    | 10.3 Not Detect  | Olf884        | 3.121212121 | 8.21212121 | 1.83928571 | 4.8392857 |
| A_51_P3299 | 18 Detected     | 28.8 Detected    | 5.5 Not Detect   | 56.1 Detected    | Fam13a        | 3.116666667 | 0.30555556 | 1.94791667 | 0.1909722 |
| A_55_P2244 | 2.7 Not Detect  | 2.9 Not Detect   | 35.7 Detected    | 8.4 Not Detect   | 4930404O17Rik | 3.111111111 | 13.2222222 | 2.89655172 | 12.310345 |
| A_66_P1076 | 2.7 Not Detect  | 3 Not Detect     | 38.6 Detected    | 8.4 Not Detect   | Gm10714       | 3.111111111 | 14.2962963 | 2.8        | 12.866667 |
| A_52_P6176 | 2.7 Not Detect  | 4.9 Not Detect   | 17.1 Detected    | 8.4 Not Detect   | Klf12         | 3.111111111 | 6.33333333 | 1.71428571 | 3.4897959 |
| A_55_P2131 | 2.7 Not Detect  | 74.8 Detected    | 3 Not Detect     | 8.4 Not Detect   | Prrx1         | 3.111111111 | 1.11111111 | 0.11229947 | 0.040107  |
| A_55_P2288 | 10.9 Not Detect | 23.8 Detected    | 25.3 Detected    | 33.9 Not Detect  | E130118H10Rik | 3.110091743 | 2.32110092 | 1.42436975 | 1.0630252 |
| A_55_P1972 | 18.7 Detected   | 12.8 Not Detect  | 15.9 Not Detect  | 58.1 Detected    | Mycl          | 3.106951872 | 0.85026738 | 4.5390625  | 1.2421875 |
| A_55_P2071 | 118.6 Detected  | 274.3 Detected   | 452.4 Detected   | 368.4 Detected   | Prss8         | 3.10623946  | 3.81450253 | 1.34305505 | 1.6492891 |
| A_51_P1898 | 46.4 Detected   | 69 Detected      | 82.4 Detected    | 143.9 Detected   | Olf1134       | 3.101293103 | 1.77586207 | 2.08550725 | 1.1942029 |
| A_55_P2019 | 77.1 Detected   | 364.6 Detected   | 181.6 Detected   | 239.1 Detected   | AA414768      | 3.101167315 | 2.35538262 | 0.65578716 | 0.4980801 |
| A_51_P4919 | 5922 Detected   | 10063.2 Detected | 9118.9 Detected  | 18360.5 Detected | Ripk3         | 3.100388382 | 1.53983452 | 1.82451904 | 0.906163  |
| A_55_P2014 | 8070.9 Detected | 10675.7 Detected | 21560.6 Detected | 25011.8 Detected | Sema4a        | 3.099010024 | 2.67139972 | 2.34287213 | 2.0195959 |
| A_55_P1983 | 3.1 Not Detect  | 23.7 Detected    | 3.5 Not Detect   | 9.6 Not Detect   | Rgag4         | 3.096774194 | 1.12903226 | 0.40506329 | 0.1476793 |
| A_52_P1869 | 3.1 Not Detect  | 27.2 Detected    | 3.4 Not Detect   | 9.6 Not Detect   | Cmpk2         | 3.096774194 | 1.09677419 | 0.35294118 | 0.125     |
| A_52_P2629 | 5.3 Not Detect  | 34.8 Detected    | 11.3 Not Detect  | 16.4 Not Detect  | 2310081J21Rik | 3.094339623 | 2.13207547 | 0.47126437 | 0.3247126 |
| A_55_P2057 | 320.7 Detected  | 980.6 Detected   | 1445.8 Detected  | 992.1 Detected   | Slmo1         | 3.09354537  | 4.50826317 | 1.01172751 | 1.4744034 |
| A_51_P3615 | 132.7 Detected  | 350.4 Detected   | 121.7 Detected   | 409.5 Detected   | Rai1          | 3.085908063 | 0.91710625 | 1.16866438 | 0.3473174 |
| A_55_P2050 | 21.3 Detected   | 21.8 Detected    | 20.1 Detected    | 65.7 Detected    | Olf213        | 3.084507042 | 0.94366197 | 3.01376147 | 0.9220183 |
| A_55_P2014 | 20.4 Detected   | 26.7 Detected    | 22.3 Detected    | 62.9 Detected    | Defb25        | 3.083333333 | 1.09313725 | 2.35580524 | 0.835206  |
| A_51_P3800 | 17 Detected     | 10.4 Not Detect  | 66.5 Detected    | 52.4 Detected    | Fcgbp         | 3.082352941 | 3.91176471 | 5.03846154 | 6.3942308 |
| A_51_P4684 | 271.4 Detected  | 319.9 Detected   | 607 Detected     | 836 Detected     | Gdpd5         | 3.080324245 | 2.23655122 | 2.61331666 | 1.897468  |

|            |        |            |        |            |        |            |        |            |               |             |            |            |           |
|------------|--------|------------|--------|------------|--------|------------|--------|------------|---------------|-------------|------------|------------|-----------|
| A_55_P1979 | 190.9  | Detected   | 183.1  | Detected   | 157.3  | Detected   | 587.7  | Compromis  | Celf6         | 3.07857517  | 0.82399162 | 3.20972146 | 0.8590934 |
| A_55_P1995 | 248.7  | Detected   | 266.3  | Detected   | 442    | Detected   | 765.5  | Detected   | Casz1         | 3.078005629 | 1.77724166 | 2.87457754 | 1.6597822 |
| A_55_P2033 | 2511.7 | Detected   | 3187.5 | Detected   | 2645.5 | Detected   | 7731   | Detected   | Ltbp4         | 3.077994983 | 1.05327069 | 2.42541176 | 0.8299608 |
| A_55_P2032 | 2.7    | Not Detect | 2.9    | Not Detect | 29.7   | Detected   | 8.3    | Not Detect | Olfrr699      | 3.074074074 | 11         | 2.86206897 | 10.241379 |
| A_55_P2084 | 65     | Detected   | 76.1   | Detected   | 98.3   | Detected   | 199.4  | Detected   | C2cd2l        | 3.067692308 | 1.51230769 | 2.62023653 | 1.2917214 |
| A_55_P1984 | 93.2   | Detected   | 589.2  | Detected   | 132.5  | Detected   | 285.9  | Detected   | Ptpr          | 3.067596567 | 1.42167382 | 0.48523422 | 0.2248812 |
| A_51_P3838 | 1719.3 | Detected   | 2260.6 | Detected   | 2951.8 | Detected   | 5268   | Detected   | Prp2          | 3.06403769  | 1.71686151 | 2.33035477 | 1.3057595 |
| A_52_P5209 | 39     | Detected   | 35.3   | Detected   | 31.6   | Detected   | 119.4  | Detected   | Taf7          | 3.061538462 | 0.81025641 | 3.38243626 | 0.8951841 |
| A_51_P2846 | 6.7    | Not Detect | 6.6    | Not Detect | 253.6  | Detected   | 20.5   | Not Detect | Plcb1         | 3.059701493 | 37.8507463 | 3.10606061 | 38.424242 |
| A_55_P2102 | 68.5   | Detected   | 96.2   | Detected   | 128.9  | Detected   | 209.5  | Detected   | Fuca2         | 3.058394161 | 1.88175182 | 2.17775468 | 1.3399168 |
| A_51_P4756 | 333.8  | Detected   | 420.3  | Detected   | 829.5  | Detected   | 1020   | Detected   | Fahd2a        | 3.055721989 | 2.48502097 | 2.42683797 | 1.9735903 |
| A_55_P2005 | 141.9  | Detected   | 268.8  | Detected   | 177.9  | Detected   | 433.3  | Detected   | 3110057O12Rik | 3.053558844 | 1.25369979 | 1.61197917 | 0.6618304 |
| A_55_P2147 | 7.6    | Not Detect | 3.2    | Not Detect | 17.8   | Detected   | 23.2   | Not Detect | C2cd4a        | 3.052631579 | 2.34210526 | 7.25       | 5.5625    |
| A_66_P1254 | 25.1   | Detected   | 17.2   | Not Detect | 8.4    | Not Detect | 76.6   | Detected   | Olfrr285      | 3.051792829 | 0.33466135 | 4.45348837 | 0.4883721 |
| A_55_P1979 | 153.2  | Detected   | 647.8  | Detected   | 217    | Detected   | 467.2  | Detected   | Cited1        | 3.049608355 | 1.41644909 | 0.72121025 | 0.3349799 |
| A_55_P2019 | 33.7   | Detected   | 29.1   | Detected   | 48     | Detected   | 102.7  | Detected   | Ncoa7         | 3.047477745 | 1.42433234 | 3.52920962 | 1.6494845 |
| A_55_P2079 | 21.6   | Detected   | 40.6   | Detected   | 25.6   | Detected   | 65.8   | Detected   | Aars          | 3.046296296 | 1.18518519 | 1.62068966 | 0.6305419 |
| A_51_P2174 | 13     | Detected   | 30.3   | Detected   | 12.9   | Not Detect | 39.6   | Not Detect | Slc2a4        | 3.046153846 | 0.99230769 | 1.30693069 | 0.4257426 |
| A_55_P2113 | 9.1    | Not Detect | 17.5   | Detected   | 18.1   | Detected   | 27.7   | Not Detect | Rem1          | 3.043956044 | 1.98901099 | 1.58285714 | 1.0342857 |
| A_55_P2033 | 27.4   | Detected   | 39.9   | Detected   | 14.2   | Not Detect | 83.4   | Detected   | Speer5-ps1    | 3.04379562  | 0.51824818 | 2.09022556 | 0.3558897 |
| A_52_P3856 | 273.1  | Detected   | 778.4  | Detected   | 184.2  | Detected   | 831    | Detected   | Ckb           | 3.04284145  | 0.67447821 | 1.06757451 | 0.2366393 |
| A_51_P1517 | 445.2  | Detected   | 1514.2 | Detected   | 704.5  | Detected   | 1353.4 | Detected   | Pkp1          | 3.039982031 | 1.58243486 | 0.89380531 | 0.4652622 |
| A_52_P6385 | 687.6  | Detected   | 519.1  | Detected   | 1454.3 | Detected   | 2090.2 | Detected   | 2310061J03Rik | 3.039848749 | 2.11503781 | 4.02658447 | 2.8015797 |
| A_55_P2231 | 7.8    | Not Detect | 21.5   | Detected   | 32.9   | Detected   | 23.7   | Not Detect | A030010E16Rik | 3.038461538 | 4.21794872 | 1.10232558 | 1.5302326 |
| A_51_P4089 | 65.4   | Detected   | 181.8  | Detected   | 32.8   | Detected   | 198.7  | Detected   | L3hypdh       | 3.0382263   | 0.50152905 | 1.0929593  | 0.180418  |
| A_55_P2017 | 11.3   | Not Detect | 32.6   | Detected   | 3.6    | Not Detect | 34.3   | Not Detect | Pde8b         | 3.03539823  | 0.31858407 | 1.05214724 | 0.1104294 |
| A_55_P1994 | 245.8  | Detected   | 251.6  | Detected   | 248.1  | Detected   | 746.1  | Detected   | Ifnl3         | 3.03539463  | 1.0093572  | 2.9654213  | 0.986089  |
| A_55_P2002 | 65.2   | Detected   | 71.1   | Detected   | 27.3   | Detected   | 197.9  | Detected   | Usp17lc       | 3.035276074 | 0.41871166 | 2.78340366 | 0.3839662 |
| A_55_P2050 | 42.6   | Detected   | 78.9   | Detected   | 61.7   | Detected   | 129.3  | Detected   | Pgbd1         | 3.035211268 | 1.44835681 | 1.63878327 | 0.7820025 |
| A_51_P3923 | 17.1   | Detected   | 118.1  | Detected   | 25.6   | Detected   | 51.9   | Detected   | Ppfia2        | 3.035087719 | 1.49707602 | 0.43945809 | 0.2167655 |
| A_55_P2161 | 223    | Detected   | 772.5  | Detected   | 474.5  | Detected   | 676.8  | Detected   | Slc38a1       | 3.034977578 | 2.12780269 | 0.8761165  | 0.6142395 |
| A_55_P1985 | 295.2  | Detected   | 600.6  | Detected   | 688.3  | Detected   | 895.7  | Detected   | Cxx1a         | 3.034214092 | 2.33163957 | 1.49134199 | 1.1460206 |
| A_55_P2034 | 51.4   | Detected   | 123.1  | Detected   | 80.1   | Detected   | 155.9  | Detected   | Eif4g3        | 3.03307393  | 1.55836576 | 1.26645004 | 0.6506905 |
| A_55_P2089 | 118.9  | Detected   | 389.8  | Detected   | 355.6  | Detected   | 360.5  | Detected   | Atg4c         | 3.03195963  | 2.99074853 | 0.92483325 | 0.9122627 |
| A_52_P1213 | 3.2    | Not Detect | 3.4    | Not Detect | 25.6   | Detected   | 9.7    | Not Detect | Nrxn1         | 3.03125     | 8          | 2.85294118 | 7.5294118 |
| A_66_P1193 | 156    | Detected   | 162.1  | Detected   | 383.3  | Detected   | 472.4  | Detected   | 2310040G24Rik | 3.028205128 | 2.45705128 | 2.91425046 | 2.3645898 |
| A_55_P1967 | 2336.2 | Detected   | 6464.9 | Detected   | 5977.3 | Detected   | 7069.6 | Detected   | Lamb3         | 3.026110778 | 2.55855663 | 1.09353586 | 0.9245773 |
| A_55_P1954 | 93.2   | Detected   | 99.7   | Detected   | 85.7   | Detected   | 281.8  | Detected   | Dock9         | 3.02360515  | 0.9195279  | 2.82647944 | 0.8595787 |
| A_55_P2021 | 176    | Detected   | 210.5  | Detected   | 326.7  | Detected   | 532.1  | Detected   | 9330133O14Rik | 3.023295455 | 1.85625    | 2.52779097 | 1.552019  |
| A_55_P2071 | 88.5   | Detected   | 195.2  | Detected   | 163.3  | Detected   | 267.4  | Detected   | Trappc11      | 3.021468927 | 1.84519774 | 1.36987705 | 0.8365779 |

|            |         |            |         |            |         |            |         |            |               |             |            |            |           |
|------------|---------|------------|---------|------------|---------|------------|---------|------------|---------------|-------------|------------|------------|-----------|
| A_55_P2028 | 465.8   | Detected   | 286.8   | Detected   | 822.3   | Detected   | 1407.4  | Detected   | Dppa5a        | 3.021468441 | 1.76534994 | 4.90725244 | 2.8671548 |
| A_55_P1998 | 217     | Detected   | 158.2   | Detected   | 383.6   | Detected   | 655.5   | Detected   | Tle4          | 3.020737327 | 1.76774194 | 4.14348925 | 2.4247788 |
| A_51_P5161 | 6657.8  | Detected   | 14052.6 | Detected   | 11690.3 | Detected   | 20110.9 | Detected   | Hist1h1c      | 3.020652468 | 1.75588032 | 1.43111595 | 0.8318959 |
| A_55_P2124 | 38.8    | Detected   | 162.3   | Detected   | 78.8    | Detected   | 117.1   | Detected   | Ak4           | 3.018041237 | 2.03092784 | 0.72150339 | 0.4855206 |
| A_55_P1960 | 589.7   | Detected   | 153     | Detected   | 474.5   | Detected   | 1779.5  | Detected   | Gdf15         | 3.017636086 | 0.80464643 | 11.630719  | 3.1013072 |
| A_55_P2244 | 190.3   | Detected   | 159.6   | Detected   | 242.5   | Detected   | 573.8   | Detected   | 6720422M22Rik | 3.015239096 | 1.27430373 | 3.5952381  | 1.5194236 |
| A_51_P3835 | 22.4    | Detected   | 54.1    | Detected   | 18.9    | Detected   | 67.5    | Detected   | Mpzl3         | 3.013392857 | 0.84375    | 1.24768946 | 0.349353  |
| A_55_P2058 | 37      | Detected   | 42.7    | Detected   | 171.1   | Detected   | 111.2   | Detected   | Ggt6          | 3.005405405 | 4.62432432 | 2.60421546 | 4.0070258 |
| A_51_P1694 | 26.5    | Detected   | 60.7    | Detected   | 62      | Detected   | 79.6    | Detected   | Ccdc89        | 3.003773585 | 2.33962264 | 1.31136738 | 1.0214168 |
| A_52_P6512 | 851.4   | Detected   | 1164.1  | Detected   | 1365.5  | Detected   | 2557.1  | Detected   | Zdhc2         | 3.003406155 | 1.60382899 | 2.19663259 | 1.1730092 |
| A_55_P2026 | 3.3     | Not Detect | 49      | Detected   | 3.6     | Not Detect | 9.9     | Not Detect | Erc2          | 3           | 1.09090909 | 0.20204082 | 0.0734694 |
| A_55_P2330 | 31.8    | Detected   | 44.3    | Detected   | 21.7    | Detected   | 95.4    | Detected   | 4930535116Rik | 3           | 0.68238994 | 2.15349887 | 0.489842  |
| A_55_P2050 | 20      | Detected   | 39.4    | Detected   | 26.1    | Detected   | 60      | Detected   | Cct6b         | 3           | 1.305      | 1.52284264 | 0.6624365 |
| A_51_P3823 | 35.2    | Detected   | 34.3    | Detected   | 56.9    | Detected   | 105.5   | Detected   | Nphp3         | 2.997159091 | 1.61647727 | 3.07580175 | 1.6588921 |
| A_55_P2148 | 101.2   | Detected   | 142.2   | Detected   | 472.4   | Detected   | 303.3   | Detected   | Gm15401       | 2.997035573 | 4.66798419 | 2.13291139 | 3.3220816 |
| A_55_P2052 | 55.5    | Detected   | 139.2   | Detected   | 70.5    | Detected   | 166.3   | Detected   | BC049762      | 2.996396396 | 1.27027027 | 1.19468391 | 0.5064655 |
| A_52_P4884 | 1617.1  | Detected   | 2489.1  | Detected   | 3902    | Detected   | 4840    | Detected   | Plek2         | 2.993012182 | 2.41296147 | 1.94447792 | 1.5676349 |
| A_55_P2151 | 14.3    | Detected   | 24.1    | Detected   | 24.1    | Detected   | 42.8    | Not Detect | Tmem116       | 2.993006993 | 1.68531469 | 1.77593361 | 1         |
| A_52_P2238 | 80.9    | Detected   | 114.1   | Detected   | 60.4    | Detected   | 241.8   | Detected   | Dhx58         | 2.988875155 | 0.74660074 | 2.11919369 | 0.5293602 |
| A_51_P1763 | 3719    | Detected   | 9748.1  | Detected   | 7245.9  | Detected   | 11114   | Detected   | Ndrp2         | 2.988437752 | 1.94834633 | 1.14011961 | 0.7433141 |
| A_55_P1952 | 7.1     | Not Detect | 17.2    | Detected   | 12.4    | Not Detect | 21.2    | Not Detect | Fkbp6         | 2.985915493 | 1.74647887 | 1.23255814 | 0.7209302 |
| A_52_P2367 | 1308    | Detected   | 1156.1  | Detected   | 8396.3  | Detected   | 3905.5  | Detected   | Ripply3       | 2.985856269 | 6.4191896  | 3.37816798 | 7.262607  |
| A_55_P2169 | 2642.8  | Detected   | 5029.8  | Detected   | 5535.6  | Detected   | 7887.4  | Detected   | D8Erdt82e     | 2.984486151 | 2.09459664 | 1.56813392 | 1.1005607 |
| A_52_P4453 | 18897.3 | Detected   | 60488.9 | Detected   | 67709.6 | Detected   | 56381   | Detected   | Krt20         | 2.983547914 | 3.58303038 | 0.93208837 | 1.1193723 |
| A_52_P8881 | 169.9   | Detected   | 445.6   | Detected   | 252.8   | Detected   | 506.8   | Detected   | Clybl         | 2.982931136 | 1.48793408 | 1.13734291 | 0.567325  |
| A_55_P2033 | 93.8    | Detected   | 95.8    | Detected   | 112.6   | Detected   | 279.7   | Detected   | AB041803      | 2.981876333 | 1.20042644 | 2.91962422 | 1.1753653 |
| A_55_P2034 | 19.7    | Detected   | 76.2    | Detected   | 9.2     | Not Detect | 58.7    | Detected   | Abcc12        | 2.979695431 | 0.46700508 | 0.77034121 | 0.1207349 |
| A_52_P6047 | 31.4    | Detected   | 39.5    | Detected   | 44.7    | Detected   | 93.5    | Detected   | Fbxl2         | 2.977707006 | 1.42356688 | 2.36708861 | 1.1316456 |
| A_51_P4218 | 71.7    | Detected   | 50.6    | Detected   | 43.3    | Detected   | 213.5   | Detected   | Irf7          | 2.977684798 | 0.60390516 | 4.21936759 | 0.8557312 |
| A_52_P6870 | 162     | Detected   | 183.8   | Detected   | 493.9   | Detected   | 482.3   | Detected   | Frm4b         | 2.977160494 | 3.04876543 | 2.62404788 | 2.68716   |
| A_55_P2076 | 166.2   | Detected   | 142.5   | Detected   | 160.7   | Detected   | 494.8   | Detected   | Bpifb1        | 2.977135981 | 0.96690734 | 3.4722807  | 1.1277193 |
| A_52_P6779 | 2394.3  | Detected   | 4141.4  | Detected   | 4834.1  | Detected   | 7123.3  | Detected   | Pex11g        | 2.975107547 | 2.01900347 | 1.72002221 | 1.1672623 |
| A_52_P2043 | 82      | Detected   | 427.1   | Detected   | 445.8   | Detected   | 243.6   | Detected   | D630039A03Rik | 2.970731707 | 5.43658537 | 0.57035823 | 1.0437837 |
| A_51_P1370 | 17      | Detected   | 6.9     | Not Detect | 3.5     | Not Detect | 50.5    | Detected   | P1ce1         | 2.970588235 | 0.20588235 | 7.31884058 | 0.5072464 |
| A_51_P3869 | 30      | Detected   | 76.9    | Detected   | 31.6    | Detected   | 89.1    | Detected   | Tnni3         | 2.97        | 1.05333333 | 1.15864759 | 0.4109233 |
| A_51_P3135 | 132.6   | Detected   | 262.6   | Detected   | 171.7   | Detected   | 393.8   | Detected   | Fabp2         | 2.969834087 | 1.29487179 | 1.49961919 | 0.6538462 |
| A_55_P1998 | 27.2    | Detected   | 67.2    | Detected   | 304.6   | Detected   | 80.7    | Detected   | Gm2030        | 2.966911765 | 11.1985294 | 1.20089286 | 4.5327381 |
| A_55_P2008 | 29.6    | Detected   | 15.4    | Not Detect | 59.6    | Detected   | 87.8    | Detected   | Slc2a9        | 2.966216216 | 2.01351351 | 5.7012987  | 3.8701299 |
| A_51_P3213 | 11.5    | Not Detect | 3.6     | Not Detect | 48.2    | Detected   | 34.1    | Not Detect | Sult1a1       | 2.965217391 | 4.19130435 | 9.47222222 | 13.388889 |
| A_55_P2105 | 2.8     | Not Detect | 24.3    | Detected   | 3       | Not Detect | 8.3     | Not Detect | Lhx4          | 2.964285714 | 1.07142857 | 0.34156379 | 0.1234568 |

|            |                  |                  |                  |                   |               |             |            |            |           |
|------------|------------------|------------------|------------------|-------------------|---------------|-------------|------------|------------|-----------|
| A_55_P2200 | 49.2 Detected    | 81.9 Detected    | 45.1 Detected    | 145.7 Detected    | Dleu2         | 2.961382114 | 0.91666667 | 1.77899878 | 0.5506716 |
| A_55_P1965 | 145.1 Detected   | 278.9 Detected   | 496.3 Detected   | 429.5 Detected    | 1700019G17Rik | 2.960027567 | 3.42039972 | 1.53997849 | 1.7794909 |
| A_55_P1996 | 506.4 Detected   | 1028 Detected    | 1028.2 Detected  | 1498.4 Detected   | Arhgap42      | 2.95892575  | 2.03041074 | 1.45758755 | 1.0001946 |
| A_55_P2341 | 43.8 Detected    | 52.1 Detected    | 57.1 Detected    | 129.6 Detected    | Fcor          | 2.95890411  | 1.30365297 | 2.48752399 | 1.0959693 |
| A_51_P1082 | 4504.2 Detected  | 9718.8 Detected  | 8759.7 Detected  | 13322.1 Detected  | Gpsm2         | 2.957706141 | 1.94478487 | 1.37075565 | 0.901315  |
| A_52_P3436 | 80.2 Detected    | 61 Detected      | 53.6 Detected    | 237.1 Detected    | Lcn10         | 2.956359102 | 0.66832918 | 3.88688525 | 0.8786885 |
| A_66_P1146 | 42952.7 Detected | 90419.7 Detected | 64957.9 Detected | 126785.2 Detected | S100a16       | 2.951739937 | 1.51231238 | 1.40218559 | 0.7184043 |
| A_51_P1146 | 109.4 Detected   | 122.6 Detected   | 272.5 Detected   | 322.8 Detected    | Amz1          | 2.950639854 | 2.49085923 | 2.63295269 | 2.2226754 |
| A_65_P1142 | 767.7 Detected   | 1386.1 Detected  | 1107 Detected    | 2264.6 Detected   | Bmp2k         | 2.949850202 | 1.44196952 | 1.63379266 | 0.7986437 |
| A_55_P2177 | 91 Detected      | 1028.6 Detected  | 85.8 Detected    | 268.3 Detected    | Cldn23        | 2.948351648 | 0.94285714 | 0.26083998 | 0.0834143 |
| A_52_P6008 | 316.7 Detected   | 447.9 Detected   | 564.7 Detected   | 933.2 Detected    | Prkcz         | 2.946637196 | 1.78307547 | 2.08350078 | 1.2607725 |
| A_55_P1955 | 7438.8 Detected  | 11529.2 Detected | 8150.8 Detected  | 21910.1 Detected  | Myo1c         | 2.945380975 | 1.09571436 | 1.90040072 | 0.7069701 |
| A_51_P1558 | 3.6 Not Detect   | 203.2 Detected   | 3.7 Not Detect   | 10.6 Not Detect   | Igsf10        | 2.944444444 | 1.02777778 | 0.05216535 | 0.0182087 |
| A_55_P1974 | 37.3 Detected    | 61.9 Detected    | 30.7 Detected    | 109.8 Detected    | C030039L03Rik | 2.943699732 | 0.8230563  | 1.77382876 | 0.4959612 |
| A_55_P2071 | 32679.3 Detected | 46117.9 Detected | 54937.9 Detected | 96169.9 Detected  | Wdr92         | 2.942838433 | 1.6811223  | 2.08530527 | 1.191249  |
| A_55_P2175 | 74.9 Detected    | 287.7 Detected   | 137.6 Detected   | 220.2 Detected    | M1ap          | 2.939919893 | 1.83711615 | 0.7653806  | 0.478276  |
| A_66_P1173 | 12.7 Not Detect  | 18 Detected      | 14.9 Not Detect  | 37.3 Not Detect   | E130018O15Rik | 2.937007874 | 1.17322835 | 2.07222222 | 0.8277778 |
| A_55_P2177 | 69.1 Detected    | 79.3 Detected    | 84.4 Detected    | 202.9 Detected    | Mast1         | 2.936324168 | 1.22141823 | 2.55863808 | 1.0643127 |
| A_55_P2070 | 5087.8 Detected  | 6937.8 Detected  | 8678.8 Detected  | 14930.3 Detected  | Krt10         | 2.934529659 | 1.70580605 | 2.15202225 | 1.2509441 |
| A_51_P1788 | 16.4 Detected    | 2.9 Not Detect   | 19.2 Detected    | 48.1 Detected     | Mbl2          | 2.932926829 | 1.17073171 | 16.5862069 | 6.6206897 |
| A_51_P4168 | 1281.2 Detected  | 1452.5 Detected  | 5054.5 Detected  | 3757.5 Detected   | Tspan15       | 2.932797377 | 3.94512957 | 2.5869191  | 3.4798623 |
| A_55_P2168 | 11.9 Not Detect  | 71.1 Detected    | 5 Not Detect     | 34.9 Not Detect   | Aicda         | 2.932773109 | 0.42016807 | 0.49085795 | 0.0703235 |
| A_55_P1960 | 24.9 Detected    | 22.5 Detected    | 21.4 Detected    | 72.9 Detected     | Cabp1         | 2.927710843 | 0.85943775 | 3.24       | 0.9511111 |
| A_55_P2046 | 917.9 Detected   | 1590.3 Detected  | 2412.6 Detected  | 2685.6 Detected   | Tmem253       | 2.925808912 | 2.62839089 | 1.68873797 | 1.5170723 |
| A_52_P4526 | 1562 Detected    | 4143.9 Detected  | 2254.5 Detected  | 4569.2 Detected   | Atf3          | 2.925224072 | 1.44334187 | 1.10263279 | 0.5440527 |
| A_52_P5785 | 1236.5 Detected  | 916 Detected     | 2528.2 Detected  | 3616.7 Detected   | Igsf11        | 2.924949454 | 2.04464214 | 3.94836245 | 2.7600437 |
| A_51_P3850 | 12.3 Not Detect  | 56.9 Detected    | 43.4 Detected    | 35.9 Not Detect   | Tnf           | 2.918699187 | 3.52845528 | 0.63093146 | 0.7627417 |
| A_55_P2186 | 218.3 Detected   | 412.2 Detected   | 363.8 Detected   | 637 Detected      | 1700009P17Rik | 2.918002749 | 1.66651397 | 1.54536633 | 0.8825813 |
| A_55_P2099 | 8.4 Not Detect   | 29.2 Detected    | 7.3 Not Detect   | 24.5 Not Detect   | Fgd4          | 2.916666667 | 0.86904762 | 0.8390411  | 0.25      |
| A_52_P2522 | 3568.7 Detected  | 7271.9 Detected  | 3901.7 Detected  | 10404.6 Detected  | Mapk12        | 2.915515454 | 1.09331129 | 1.43079525 | 0.5365448 |
| A_55_P2059 | 648.6 Detected   | 5219.7 Detected  | 1647 Detected    | 1890.6 Detected   | Prom1         | 2.914893617 | 2.53931545 | 0.36220472 | 0.3155354 |
| A_55_P2044 | 25.2 Detected    | 38.5 Detected    | 25.5 Detected    | 73.4 Detected     | 9130019O22Rik | 2.912698413 | 1.01190476 | 1.90649351 | 0.6623377 |
| A_55_P2269 | 192.1 Detected   | 186.7 Detected   | 175.9 Detected   | 559.4 Detected    | Cabp1         | 2.912024987 | 0.91566892 | 2.99625067 | 0.9421532 |
| A_55_P2010 | 2068.9 Detected  | 3571.9 Detected  | 2087.1 Detected  | 6024.4 Detected   | Fbxo17        | 2.911885543 | 1.00879695 | 1.68660937 | 0.5843109 |
| A_55_P2115 | 8.9 Not Detect   | 21 Detected      | 19 Detected      | 25.9 Not Detect   | Prm3          | 2.91011236  | 2.13483146 | 1.23333333 | 0.9047619 |
| A_66_P1057 | 1751.1 Detected  | 2170.4 Detected  | 2532.3 Detected  | 5095.4 Detected   | Prkca         | 2.909828108 | 1.44611958 | 2.34767785 | 1.1667435 |
| A_55_P1984 | 2062.3 Detected  | 3756.4 Detected  | 7694.7 Detected  | 5998.5 Detected   | Abhd6         | 2.908645687 | 3.73112544 | 1.59687467 | 2.048424  |
| A_52_P2704 | 16.8 Detected    | 28.9 Detected    | 612.6 Detected   | 48.8 Not Detect   | Fam25c        | 2.904761905 | 36.4642857 | 1.68858131 | 21.197232 |
| A_55_P2110 | 932.8 Detected   | 971.2 Detected   | 1811.4 Detected  | 2709.4 Detected   | Tmem254a      | 2.904588336 | 1.94189537 | 2.78974465 | 1.8651153 |
| A_55_P2258 | 55.4 Detected    | 45.8 Detected    | 86.4 Detected    | 160.8 Detected    | BC037704      | 2.902527076 | 1.55956679 | 3.51091703 | 1.8864629 |

|            |                  |                  |                  |                  |               |             |            |            |           |
|------------|------------------|------------------|------------------|------------------|---------------|-------------|------------|------------|-----------|
| A_52_P3789 | 443 Detected     | 345.3 Detected   | 457.6 Detected   | 1285.2 Detected  | AU040320      | 2.901128668 | 1.03295711 | 3.72198089 | 1.3252244 |
| A_52_P2635 | 11 Not Detect    | 24.6 Detected    | 7.8 Not Detect   | 31.9 Not Detect  | Arhgef7       | 2.9         | 0.70909091 | 1.29674797 | 0.3170732 |
| A_55_P2082 | 5 Not Detect     | 18.9 Detected    | 13.4 Not Detect  | 14.5 Not Detect  | Vmn1r234      | 2.9         | 2.68       | 0.76719577 | 0.7089947 |
| A_55_P2016 | 400.6 Detected   | 228.4 Detected   | 1174.9 Detected  | 1161.5 Detected  | Ick           | 2.899400899 | 2.93285072 | 5.08537653 | 5.1440455 |
| A_55_P2017 | 13.6 Not Detect  | 18.6 Detected    | 32.3 Detected    | 39.4 Not Detect  | Lpar5         | 2.897058824 | 2.375      | 2.11827957 | 1.7365591 |
| A_51_P1371 | 27.9 Detected    | 15 Not Detect    | 16.5 Not Detect  | 80.8 Detected    | Fam209        | 2.896057348 | 0.59139785 | 5.38666667 | 1.1       |
| A_65_P1816 | 1395 Detected    | 1517.1 Detected  | 2020.5 Detected  | 4037.6 Detected  | Hnrnpul2      | 2.894336918 | 1.4483871  | 2.66139345 | 1.3318173 |
| A_55_P2083 | 90.9 Detected    | 207.1 Detected   | 134 Detected     | 262.9 Detected   | Tmem159       | 2.892189219 | 1.47414741 | 1.26943506 | 0.6470304 |
| A_66_P1284 | 39.9 Detected    | 68.3 Detected    | 74.5 Detected    | 115.3 Detected   | Rimbp3        | 2.889724311 | 1.86716792 | 1.68814056 | 1.090776  |
| A_55_P1972 | 3.6 Not Detect   | 32.2 Detected    | 3.7 Not Detect   | 10.4 Not Detect  | Themis        | 2.888888889 | 1.02777778 | 0.32298137 | 0.1149068 |
| A_55_P2174 | 19.4 Detected    | 17.4 Not Detect  | 23.3 Detected    | 56 Detected      | Slco5a1       | 2.886597938 | 1.20103093 | 3.2183908  | 1.3390805 |
| A_52_P3571 | 20.9 Detected    | 15.7 Not Detect  | 42 Detected      | 60.3 Detected    | Atp8b3        | 2.885167464 | 2.00956938 | 3.84076433 | 2.6751592 |
| A_55_P2021 | 200.2 Detected   | 276.9 Detected   | 289.4 Detected   | 577.6 Detected   | Tigd3         | 2.885114885 | 1.44555445 | 2.08595161 | 1.0451427 |
| A_66_P1240 | 2936 Detected    | 3853.4 Detected  | 9362.4 Detected  | 8434.1 Detected  | Spint2        | 2.872649864 | 3.18882834 | 2.18874241 | 2.4296465 |
| A_55_P2011 | 30.6 Detected    | 64.3 Detected    | 8.2 Not Detect   | 87.9 Detected    | Ppargc1a      | 2.87254902  | 0.26797386 | 1.36702955 | 0.1275272 |
| A_52_P3610 | 3041.7 Detected  | 1604.2 Detected  | 6322.8 Detected  | 8734.3 Detected  | Arhgef16      | 2.871519216 | 2.07870599 | 5.44464531 | 3.9414038 |
| A_55_P2087 | 3.8 Not Detect   | 20.9 Detected    | 9.8 Not Detect   | 10.9 Not Detect  | Gm10498       | 2.868421053 | 2.57894737 | 0.5215311  | 0.4688995 |
| A_51_P4315 | 6.8 Not Detect   | 22.5 Detected    | 5.1 Not Detect   | 19.5 Not Detect  | Prss56        | 2.867647059 | 0.75       | 0.86666667 | 0.2266667 |
| A_55_P1996 | 175.8 Detected   | 177.1 Detected   | 163.5 Detected   | 504.1 Detected   | Ifna14        | 2.867463026 | 0.93003413 | 2.84641446 | 0.9232072 |
| A_55_P2010 | 126.3 Detected   | 126.5 Detected   | 328.9 Detected   | 361.9 Detected   | 2810416G20Rik | 2.865399842 | 2.60411718 | 2.86086957 | 2.6       |
| A_55_P1960 | 2690.3 Detected  | 2600.9 Detected  | 5796.7 Detected  | 7707.9 Detected  | Bcat2         | 2.86507081  | 2.15466677 | 2.96355108 | 2.2287285 |
| A_52_P5509 | 1020.2 Detected  | 1415 Detected    | 2467.4 Detected  | 2920.9 Detected  | H1f0          | 2.863066065 | 2.41854538 | 2.06424028 | 1.7437456 |
| A_51_P3225 | 972.4 Detected   | 1286 Detected    | 1461.2 Detected  | 2784 Detected    | Bbx           | 2.863019334 | 1.5026738  | 2.16485226 | 1.1362364 |
| A_52_P5911 | 14.5 Detected    | 9.8 Not Detect   | 4.3 Not Detect   | 41.5 Not Detect  | Pld4          | 2.862068966 | 0.29655172 | 4.23469388 | 0.4387755 |
| A_55_P1997 | 9189.3 Detected  | 29254.2 Detected | 28310.2 Detected | 26255.5 Detected | Acp5          | 2.857181722 | 3.08077873 | 0.89749506 | 0.9677311 |
| A_51_P4248 | 1645.5 Detected  | 4076.8 Detected  | 1694.6 Detected  | 4697.1 Detected  | Fam213b       | 2.854512306 | 1.02983895 | 1.15215365 | 0.4156692 |
| A_52_P5180 | 199.5 Detected   | 371.2 Detected   | 491.4 Detected   | 569.2 Detected   | Nudt17        | 2.853132832 | 2.46315789 | 1.53340517 | 1.3238147 |
| A_51_P2216 | 29.1 Detected    | 34.7 Detected    | 41 Detected      | 83 Detected      | Adck3         | 2.852233677 | 1.40893471 | 2.39193084 | 1.1815562 |
| A_51_P5038 | 236.4 Detected   | 260.6 Detected   | 368.2 Detected   | 673.9 Detected   | Pycr1         | 2.850676819 | 1.55752961 | 2.58595549 | 1.4128933 |
| A_51_P1852 | 99.7 Detected    | 162.3 Detected   | 218.6 Detected   | 284.2 Detected   | 4930581F22Rik | 2.850551655 | 2.19257773 | 1.75107825 | 1.3468885 |
| A_55_P1981 | 2078.3 Detected  | 3408.2 Detected  | 2804 Detected    | 5921.4 Detected  | Klhl5         | 2.84915556  | 1.34917962 | 1.73739804 | 0.8227217 |
| A_55_P2104 | 299.7 Detected   | 830.6 Detected   | 528.3 Detected   | 853.7 Detected   | 6330416G13Rik | 2.848515182 | 1.76276276 | 1.02781122 | 0.6360462 |
| A_65_P1721 | 635.9 Detected   | 294.6 Detected   | 89.8 Detected    | 1810 Detected    | Mndal         | 2.84635949  | 0.14121717 | 6.14392396 | 0.3048201 |
| A_55_P1957 | 20509.8 Detected | 26471.2 Detected | 30089.3 Detected | 58353.9 Detected | 3930401B19Rik | 2.845171577 | 1.4670694  | 2.20442972 | 1.1366806 |
| A_51_P4938 | 1339.1 Detected  | 1170.9 Detected  | 3412.5 Detected  | 3809.5 Detected  | Gpt2          | 2.844821149 | 2.54835337 | 3.25348023 | 2.9144248 |
| A_55_P2102 | 185.5 Detected   | 251.9 Detected   | 444.9 Detected   | 527.2 Detected   | Fuca2         | 2.842048518 | 2.39838275 | 2.09289401 | 1.7661771 |
| A_55_P2275 | 128.5 Detected   | 273.2 Detected   | 173.8 Detected   | 364.8 Detected   | C430042M11Rik | 2.838910506 | 1.35252918 | 1.33528551 | 0.636164  |
| A_66_P1132 | 1687.1 Detected  | 2331.3 Detected  | 767.1 Detected   | 4788 Detected    | Mme           | 2.838006046 | 0.45468556 | 2.05378973 | 0.3290439 |
| A_55_P2179 | 15612.2 Detected | 16036.9 Detected | 43065.3 Detected | 44284.4 Detected | Lgals3bp      | 2.836525282 | 2.75843891 | 2.76140651 | 2.6853881 |
| A_55_P2443 | 2573.6 Detected  | 4034.2 Detected  | 4624 Detected    | 7297.6 Detected  | Ube4a         | 2.835561082 | 1.796705   | 1.80893362 | 1.1462    |



|            |         |            |         |            |         |            |         |            |               |             |            |            |           |
|------------|---------|------------|---------|------------|---------|------------|---------|------------|---------------|-------------|------------|------------|-----------|
| A_55_P2088 | 122.8   | Detected   | 307.3   | Detected   | 156.6   | Detected   | 348.2   | Detected   | Sgsm1         | 2.835504886 | 1.2752443  | 1.1330947  | 0.5095997 |
| A_65_P0141 | 17.6    | Detected   | 27.1    | Detected   | 216.6   | Detected   | 49.9    | Detected   | Wnk2          | 2.835227273 | 12.3068182 | 1.84132841 | 7.9926199 |
| A_55_P2072 | 13.8    | Not Detect | 26.6    | Detected   | 40.6    | Detected   | 39.1    | Not Detect | AW011738      | 2.833333333 | 2.94202899 | 1.46992481 | 1.5263158 |
| A_55_P2028 | 29.9    | Detected   | 36.7    | Detected   | 21      | Detected   | 84.7    | Detected   | Htr6          | 2.83277592  | 0.70234114 | 2.30790191 | 0.5722071 |
| A_55_P2013 | 85.5    | Detected   | 532.2   | Detected   | 161.6   | Detected   | 242.1   | Detected   | Tcam1         | 2.831578947 | 1.89005848 | 0.45490417 | 0.3036452 |
| A_51_P1610 | 12134.1 | Detected   | 37933.1 | Detected   | 24047   | Detected   | 34347.8 | Detected   | Ppic          | 2.830683775 | 1.98177038 | 0.9054836  | 0.6339318 |
| A_55_P2058 | 896.3   | Detected   | 2879.2  | Detected   | 2408.5  | Detected   | 2536.7  | Detected   | Ccbl2         | 2.830190784 | 2.68715832 | 0.88104335 | 0.8365171 |
| A_55_P2029 | 3682.4  | Detected   | 4735.5  | Detected   | 8063.1  | Detected   | 10416.7 | Detected   | 2610318N02Rik | 2.828780143 | 2.18963176 | 2.19970436 | 1.7026924 |
| A_52_P3247 | 32.1    | Detected   | 32.2    | Detected   | 36.8    | Detected   | 90.8    | Detected   | Nupr1l        | 2.828660436 | 1.14641745 | 2.81987578 | 1.1428571 |
| A_51_P5024 | 5664.7  | Detected   | 12199.1 | Detected   | 11013.2 | Detected   | 16017.6 | Detected   | H2-K2         | 2.827616643 | 1.94418063 | 1.31301489 | 0.9027879 |
| A_55_P2145 | 407.5   | Detected   | 741.2   | Detected   | 510.7   | Detected   | 1151.3  | Detected   | D1Erd448e     | 2.825276074 | 1.25325153 | 1.55329196 | 0.6890178 |
| A_55_P2032 | 5651.4  | Detected   | 14811.5 | Detected   | 5151.8  | Detected   | 15965.8 | Detected   | Trim2         | 2.825105284 | 0.91159713 | 1.07793269 | 0.3478243 |
| A_55_P2004 | 22      | Detected   | 32.4    | Detected   | 29.2    | Detected   | 62.1    | Detected   | 3110040M04Rik | 2.822727273 | 1.32727273 | 1.91666667 | 0.9012346 |
| A_52_P1280 | 79.4    | Detected   | 136.4   | Detected   | 147.8   | Detected   | 224.1   | Detected   | 3830406C13Rik | 2.822418136 | 1.86146096 | 1.64296188 | 1.0835777 |
| A_52_P227  | 14      | Not Detect | 54.8    | Detected   | 33.5    | Detected   | 39.5    | Not Detect | 4930520O04Rik | 2.821428571 | 2.39285714 | 0.72080292 | 0.6113139 |
| A_55_P2090 | 23.7    | Detected   | 38      | Detected   | 30.8    | Detected   | 66.8    | Detected   | Macrod2       | 2.818565401 | 1.29957806 | 1.75789474 | 0.8105263 |
| A_55_P2062 | 22.4    | Detected   | 42.3    | Detected   | 12.3    | Not Detect | 63.1    | Detected   | Apold1        | 2.816964286 | 0.54910714 | 1.49172577 | 0.2907801 |
| A_52_P4329 | 3533.9  | Detected   | 3659.7  | Detected   | 6661.1  | Detected   | 9943.6  | Detected   | Rab3d         | 2.813775149 | 1.88491468 | 2.71705331 | 1.8201219 |
| A_51_P1380 | 272.3   | Detected   | 271.3   | Detected   | 615.7   | Detected   | 765.9   | Detected   | Rnf13         | 2.812706574 | 2.26110907 | 2.82307409 | 2.2694434 |
| A_55_P2088 | 4769.1  | Detected   | 6714.6  | Detected   | 3973.5  | Detected   | 13405.4 | Detected   | Tcn2          | 2.81088675  | 0.83317607 | 1.99645549 | 0.5917702 |
| A_55_P2029 | 766.6   | Detected   | 1019.4  | Detected   | 678.8   | Detected   | 2154.8  | Detected   | Pde4a         | 2.810853118 | 0.8854683  | 2.11379243 | 0.6658819 |
| A_55_P2158 | 3.7     | Not Detect | 3.7     | Not Detect | 157.6   | Detected   | 10.4    | Not Detect | Htr2c         | 2.810810811 | 42.5945946 | 2.81081081 | 42.594595 |
| A_55_P2060 | 17.3    | Detected   | 23      | Detected   | 38.9    | Detected   | 48.6    | Not Detect | 3110062M04Rik | 2.809248555 | 2.24855491 | 2.11304348 | 1.6913043 |
| A_51_P1246 | 890.5   | Detected   | 1457    | Detected   | 1012    | Detected   | 2501.4  | Detected   | Nat2          | 2.808983717 | 1.1364402  | 1.71681537 | 0.6945779 |
| A_51_P4035 | 7023.6  | Detected   | 8537    | Detected   | 7800.1  | Detected   | 19728.3 | Detected   | Ltbp4         | 2.808858705 | 1.11055584 | 2.31091718 | 0.9136816 |
| A_55_P2062 | 26.9    | Detected   | 46.7    | Detected   | 36.3    | Detected   | 75.5    | Detected   | BC030499      | 2.80669145  | 1.34944238 | 1.61670236 | 0.7773019 |
| A_51_P1387 | 4296    | Detected   | 5252.6  | Detected   | 7437.2  | Detected   | 12045.7 | Detected   | Abcd4         | 2.803933892 | 1.73119181 | 2.29328333 | 1.4159083 |
| A_52_P5251 | 85      | Detected   | 99      | Detected   | 40.4    | Detected   | 238.2   | Detected   | Acot2         | 2.802352941 | 0.47529412 | 2.40606061 | 0.4080808 |
| A_55_P1997 | 1380.6  | Detected   | 423     | Detected   | 359.5   | Detected   | 3867.2  | Detected   | LOC630751     | 2.801100971 | 0.26039403 | 9.14231678 | 0.8498818 |
| A_55_P2054 | 102.3   | Detected   | 104     | Detected   | 122     | Detected   | 286.5   | Detected   | Tnip3         | 2.80058651  | 1.19257087 | 2.75480769 | 1.1730769 |
| A_55_P2051 | 8531.2  | Detected   | 17964.5 | Detected   | 16335.4 | Detected   | 23881.1 | Detected   | H2-K2         | 2.799266223 | 1.91478338 | 1.32934955 | 0.9093156 |
| A_55_P2340 | 1825.8  | Detected   | 2810.2  | Detected   | 5258.6  | Detected   | 5109.7  | Detected   | 1810019D21Rik | 2.798608829 | 2.88016212 | 1.81826916 | 1.8712547 |
| A_52_P2497 | 102     | Detected   | 65.6    | Detected   | 117.6   | Detected   | 285.3   | Detected   | Tcap          | 2.797058824 | 1.15294118 | 4.34908537 | 1.7926829 |
| A_55_P2154 | 903.6   | Detected   | 1312.8  | Detected   | 5702.6  | Detected   | 2526.7  | Detected   | Pter          | 2.796259407 | 6.31097831 | 1.92466484 | 4.3438452 |
| A_55_P2073 | 97.9    | Detected   | 217.6   | Detected   | 92.3    | Detected   | 273.7   | Detected   | Trim9         | 2.795709908 | 0.94279877 | 1.2578125  | 0.4241728 |
| A_55_P1974 | 9.3     | Not Detect | 10.3    | Not Detect | 24.6    | Detected   | 26      | Not Detect | Gm13769       | 2.795698925 | 2.64516129 | 2.52427184 | 2.3883495 |
| A_55_P2061 | 115.5   | Detected   | 486.2   | Detected   | 151.4   | Detected   | 322.9   | Detected   | Zfhx4         | 2.795670996 | 1.31082251 | 0.66412999 | 0.3113945 |
| A_55_P1968 | 3973.9  | Detected   | 2994.8  | Detected   | 8936.2  | Detected   | 11105.6 | Detected   | Plekhh1       | 2.794634993 | 2.24872292 | 3.70829438 | 2.9839054 |
| A_55_P1993 | 88.6    | Detected   | 113.1   | Detected   | 177.5   | Detected   | 247.6   | Detected   | Ppargc1b      | 2.794582393 | 2.003386   | 2.18921309 | 1.5694076 |
| A_66_P1177 | 323.7   | Detected   | 248.9   | Detected   | 252.7   | Detected   | 904.4   | Detected   | Crxos1        | 2.793945011 | 0.78066111 | 3.63358779 | 1.0152672 |

|            |                  |                  |                  |                  |               |             |            |            |           |
|------------|------------------|------------------|------------------|------------------|---------------|-------------|------------|------------|-----------|
| A_55_P2145 | 679.1 Detected   | 648.7 Detected   | 986.7 Detected   | 1895.8 Detected  | Hlcs          | 2.791635989 | 1.45295244 | 2.92246031 | 1.5210421 |
| A_55_P2169 | 4905.6 Detected  | 9311.4 Detected  | 7676.9 Detected  | 13692.6 Detected | Cgn           | 2.7912182   | 1.5649258  | 1.47052001 | 0.8244625 |
| A_55_P2184 | 42.3 Detected    | 37.2 Detected    | 38.3 Detected    | 118 Detected     | AA386476      | 2.789598109 | 0.90543735 | 3.17204301 | 1.0295699 |
| A_51_P4562 | 759.9 Detected   | 13.4 Not Detect  | 20070.6 Detected | 2119.3 Detected  | Tff3          | 2.788919595 | 26.4121595 | 158.156716 | 1497.806  |
| A_52_P7639 | 59.7 Detected    | 148.4 Detected   | 115.9 Detected   | 166.4 Detected   | Gm4285        | 2.787269682 | 1.94137353 | 1.1212938  | 0.7809973 |
| A_51_P4924 | 1435.1 Detected  | 2524.1 Detected  | 5314.4 Detected  | 3996.6 Detected  | Cstf2t        | 2.784893039 | 3.70315657 | 1.58337625 | 2.1054633 |
| A_55_P2034 | 545.4 Detected   | 691.3 Detected   | 858.8 Detected   | 1518.1 Detected  | Prh1          | 2.78346168  | 1.57462413 | 2.19600752 | 1.2422971 |
| A_52_P7968 | 14.3 Not Detect  | 72.5 Detected    | 51.5 Detected    | 39.8 Not Detect  | Cfhr2         | 2.783216783 | 3.6013986  | 0.54896552 | 0.7103448 |
| A_55_P2030 | 105 Detected     | 138.7 Detected   | 147.5 Detected   | 292 Detected     | 5930403N24Rik | 2.780952381 | 1.4047619  | 2.10526316 | 1.0634463 |
| A_55_P2116 | 6414.3 Detected  | 7037.7 Detected  | 8778 Detected    | 17830.5 Detected | Hook2         | 2.779804499 | 1.36850475 | 2.53356921 | 1.2472825 |
| A_52_P3387 | 14.5 Not Detect  | 47.4 Detected    | 38.7 Detected    | 40.3 Not Detect  | Ispd          | 2.779310345 | 2.66896552 | 0.85021097 | 0.8164557 |
| A_55_P2034 | 2871.7 Detected  | 3985.8 Detected  | 3029.9 Detected  | 7976.7 Detected  | Eif4g3        | 2.777692656 | 1.05508932 | 2.00127954 | 0.7601736 |
| A_51_P5070 | 3385.7 Detected  | 11873.2 Detected | 7271.5 Detected  | 9400 Detected    | Slc38a1       | 2.776383023 | 2.14770948 | 0.79169895 | 0.6124297 |
| A_55_P2130 | 2439.3 Detected  | 6177.5 Detected  | 6747.7 Detected  | 6770.1 Detected  | Polr2l        | 2.775427377 | 2.76624441 | 1.09592877 | 1.0923027 |
| A_55_P2147 | 74.8 Detected    | 98.4 Detected    | 68.1 Detected    | 207.6 Detected   | Fam129c       | 2.77540107  | 0.91042781 | 2.1097561  | 0.6920732 |
| A_66_P1049 | 549 Detected     | 691 Detected     | 992.4 Detected   | 1523.6 Detected  | Krt24         | 2.775227687 | 1.80765027 | 2.20492041 | 1.4361795 |
| A_66_P1001 | 1824.6 Detected  | 1702.8 Detected  | 2020.2 Detected  | 5061.9 Detected  | Inadl         | 2.774251891 | 1.10720158 | 2.97269204 | 1.1863989 |
| A_66_P1347 | 611.7 Detected   | 849.1 Detected   | 3868.1 Detected  | 1696 Detected    | Pter          | 2.772600948 | 6.3235246  | 1.99740902 | 4.5555294 |
| A_51_P2652 | 291.4 Detected   | 295.7 Detected   | 381.5 Detected   | 807.9 Detected   | Ppm1k         | 2.772477694 | 1.30919698 | 2.73216097 | 1.2901589 |
| A_55_P2125 | 3580.7 Detected  | 3979.1 Detected  | 1549.4 Detected  | 9923.8 Detected  | Rab3b         | 2.771469266 | 0.43270869 | 2.49398105 | 0.3893845 |
| A_51_P1469 | 66.8 Detected    | 86.3 Detected    | 11.2 Not Detect  | 185.1 Detected   | Dmrt2         | 2.770958084 | 0.16766467 | 2.14484357 | 0.1297798 |
| A_55_P2068 | 113.2 Detected   | 130.3 Detected   | 109.4 Detected   | 313.5 Detected   | Myct1         | 2.769434629 | 0.9664311  | 2.40598619 | 0.8396009 |
| A_66_P1102 | 651 Detected     | 724.9 Detected   | 638.4 Detected   | 1802.6 Compromis | Tmem91        | 2.768970814 | 0.98064516 | 2.48668782 | 0.8806732 |
| A_55_P2092 | 20.7 Detected    | 59.2 Detected    | 59.9 Detected    | 57.3 Detected    | Ccbl2         | 2.768115942 | 2.89371981 | 0.96790541 | 1.0118243 |
| A_55_P1983 | 10140.9 Detected | 12317.2 Detected | 15644.4 Detected | 28069.1 Detected | Hdac5         | 2.767910146 | 1.54270331 | 2.27885396 | 1.2701263 |
| A_51_P3886 | 131.8 Detected   | 153.9 Detected   | 189.7 Detected   | 364.7 Detected   | Bbx           | 2.76707132  | 1.43930197 | 2.3697206  | 1.2326186 |
| A_52_P1044 | 23.4 Detected    | 20.3 Detected    | 21.1 Detected    | 64.7 Detected    | Grin2b        | 2.764957265 | 0.9017094  | 3.18719212 | 1.0394089 |
| A_55_P2213 | 49.6 Detected    | 79.3 Detected    | 37.4 Detected    | 137.1 Detected   | 5330421C15Rik | 2.764112903 | 0.75403226 | 1.72887768 | 0.4716267 |
| A_55_P2327 | 485.7 Detected   | 1029.5 Detected  | 749.2 Detected   | 1342.5 Detected  | Il13ra2       | 2.764051884 | 1.54251596 | 1.30403108 | 0.7277319 |
| A_51_P1410 | 89 Detected      | 449.9 Detected   | 218.2 Detected   | 245.9 Detected   | Cand2         | 2.762921348 | 2.45168539 | 0.5465659  | 0.4849967 |
| A_52_P1571 | 428.7 Detected   | 420.5 Detected   | 164 Detected     | 1183.5 Detected  | Rnf157        | 2.760671798 | 0.3825519  | 2.81450654 | 0.3900119 |
| A_55_P2158 | 37.1 Detected    | 37.2 Detected    | 29.7 Detected    | 102.3 Detected   | Camp          | 2.757412399 | 0.80053908 | 2.75       | 0.7983871 |
| A_51_P1492 | 42.3 Detected    | 36.1 Detected    | 44 Detected      | 116.6 Detected   | Phospho1      | 2.756501182 | 1.04018913 | 3.2299169  | 1.2188366 |
| A_51_P4429 | 144.7 Detected   | 136.7 Detected   | 158.5 Detected   | 398.6 Detected   | Amigo3        | 2.754664824 | 1.09536973 | 2.91587418 | 1.1594733 |
| A_55_P2036 | 49.5 Detected    | 79.8 Detected    | 89 Detected      | 136.3 Detected   | Mcf2l         | 2.753535354 | 1.7979798  | 1.70802005 | 1.1152882 |
| A_52_P2002 | 487.8 Detected   | 773.5 Detected   | 925.4 Detected   | 1341.6 Detected  | Rmnd5a        | 2.750307503 | 1.89708897 | 1.73445378 | 1.1963801 |
| A_51_P1171 | 185.7 Detected   | 235.3 Detected   | 380.7 Detected   | 510.7 Detected   | Naga          | 2.750134626 | 2.05008078 | 2.17042074 | 1.6179346 |
| A_51_P1194 | 89.6 Detected    | 373.2 Detected   | 70.1 Detected    | 246.4 Detected   | Nckap1l       | 2.75        | 0.78236607 | 0.6602358  | 0.1878349 |
| A_51_P4080 | 3.6 Not Detect   | 4.6 Not Detect   | 666.7 Detected   | 9.9 Not Detect   | Apoa1         | 2.75        | 185.194444 | 2.15217391 | 144.93478 |
| A_55_P2137 | 6.4 Not Detect   | 20.7 Detected    | 14.5 Not Detect  | 17.6 Not Detect  | Vmn1r207-ps   | 2.75        | 2.265625   | 0.85024155 | 0.7004831 |

|            |                  |                  |                  |                   |               |             |            |            |           |
|------------|------------------|------------------|------------------|-------------------|---------------|-------------|------------|------------|-----------|
| A_55_P2034 | 67.8 Detected    | 126.1 Detected   | 84 Detected      | 186.4 Detected    | Eif4g3        | 2.749262537 | 1.23893805 | 1.47819191 | 0.666138  |
| A_55_P2072 | 27.9 Detected    | 33.3 Detected    | 41.2 Detected    | 76.7 Detected     | 1-Mar         | 2.749103943 | 1.47670251 | 2.3033033  | 1.2372372 |
| A_55_P2029 | 2156.8 Detected  | 2812.6 Detected  | 4617.5 Detected  | 5927.5 Detected   | 2610318N02Rik | 2.748284496 | 2.14090319 | 2.10748062 | 1.6417194 |
| A_51_P2005 | 99.3 Detected    | 187.4 Detected   | 66.7 Detected    | 272.9 Detected    | Rasgef1a      | 2.748237664 | 0.67170191 | 1.45624333 | 0.3559232 |
| A_51_P1088 | 154.2 Detected   | 296.6 Detected   | 575.5 Detected   | 423.5 Detected    | Lyp1a1        | 2.746433204 | 3.73216602 | 1.42784895 | 1.9403237 |
| A_55_P2082 | 111.2 Detected   | 119.9 Detected   | 227.5 Detected   | 305.4 Detected    | AA388235      | 2.746402878 | 2.04586331 | 2.5471226  | 1.8974145 |
| A_51_P3596 | 28603.9 Detected | 27198.8 Detected | 76658.1 Detected | 78496.9 Detected  | Lgals3bp      | 2.744272634 | 2.67998769 | 2.88604277 | 2.8184368 |
| A_66_P1018 | 94.3 Detected    | 209.9 Detected   | 185.8 Detected   | 258.7 Detected    | Cd38          | 2.743372216 | 1.97030753 | 1.23249166 | 0.8851834 |
| A_55_P2065 | 5094.1 Detected  | 5600.2 Detected  | 6820.6 Detected  | 13958.3 Detected  | Hook2         | 2.740091478 | 1.3389215  | 2.49246455 | 1.2179208 |
| A_55_P2014 | 72.6 Detected    | 87 Detected      | 103.2 Detected   | 198.9 Detected    | Gm7285        | 2.739669421 | 1.4214876  | 2.2862069  | 1.1862069 |
| A_55_P2107 | 87.8 Detected    | 93.9 Detected    | 205.6 Detected   | 240.5 Detected    | Slc18a1       | 2.739179954 | 2.34168565 | 2.56123536 | 2.1895634 |
| A_52_P3164 | 11.5 Not Detect  | 64.2 Detected    | 35.6 Detected    | 31.5 Not Detect   | Tmem145       | 2.739130435 | 3.09565217 | 0.49065421 | 0.5545171 |
| A_55_P2149 | 26.4 Detected    | 40.9 Detected    | 22.1 Detected    | 72.3 Detected     | Zfp853        | 2.738636364 | 0.83712121 | 1.76772616 | 0.5403423 |
| A_66_P1296 | 1045.9 Detected  | 1594.7 Detected  | 2427.6 Detected  | 2863.7 Detected   | Phldb3        | 2.738024668 | 2.3210632  | 1.79576096 | 1.5222926 |
| A_51_P1890 | 289.6 Detected   | 314.3 Detected   | 425.8 Detected   | 792.5 Detected    | Ppp1r27       | 2.736533149 | 1.47030387 | 2.5214763  | 1.3547566 |
| A_55_P2007 | 99.9 Detected    | 80.7 Detected    | 73.9 Detected    | 273.3 Detected    | Cyp2t4        | 2.735735736 | 0.73973974 | 3.3866171  | 0.9157373 |
| A_51_P1157 | 3.4 Not Detect   | 21 Detected      | 11.3 Not Detect  | 9.3 Not Detect    | Asb2          | 2.735294118 | 3.32352941 | 0.44285714 | 0.5380952 |
| A_52_P2977 | 8.3 Not Detect   | 27.2 Detected    | 31.3 Detected    | 22.7 Not Detect   | Uggt2         | 2.734939759 | 3.77108434 | 0.83455882 | 1.1507353 |
| A_55_P2029 | 859.5 Detected   | 1938.1 Detected  | 1872.2 Detected  | 2349.9 Detected   | LOC101056305  | 2.734031414 | 2.17824316 | 1.21247614 | 0.9659976 |
| A_52_P4884 | 803.3 Detected   | 1404.5 Detected  | 651.7 Detected   | 2194.6 Detected   | Sec14l2       | 2.73198058  | 0.81127848 | 1.56254895 | 0.4640085 |
| A_55_P2104 | 163.5 Detected   | 89.5 Detected    | 51.3 Detected    | 446.5 Detected    | Plin5         | 2.73088685  | 0.31376147 | 4.98882682 | 0.5731844 |
| A_55_P2148 | 38137.9 Detected | 75402 Detected   | 55965.2 Detected | 104082.9 Detected | S100a16       | 2.729119852 | 1.46744315 | 1.3803732  | 0.7422243 |
| A_51_P1844 | 222.9 Detected   | 638.5 Detected   | 236.4 Detected   | 608.3 Detected    | Mmp13         | 2.729026469 | 1.06056528 | 0.95270164 | 0.3702428 |
| A_52_P2326 | 88.2 Detected    | 352.2 Detected   | 219 Detected     | 240.7 Detected    | Slc38a1       | 2.729024943 | 2.4829932  | 0.68341851 | 0.6218058 |
| A_55_P2349 | 95.8 Detected    | 133.1 Detected   | 93.5 Detected    | 261.4 Detected    | 8030494B02Rik | 2.728601253 | 0.97599165 | 1.96393689 | 0.7024793 |
| A_51_P2508 | 296.4 Detected   | 472.3 Detected   | 387.8 Detected   | 808.7 Detected    | Spata2l       | 2.728407557 | 1.30836707 | 1.71225916 | 0.8210883 |
| A_51_P1769 | 400.6 Detected   | 392.9 Detected   | 635.4 Detected   | 1092.8 Detected   | Hlcs          | 2.727908138 | 1.58612082 | 2.78136931 | 1.6172054 |
| A_55_P2105 | 45.2 Detected    | 67 Detected      | 30.5 Detected    | 123.3 Detected    | Tmed5         | 2.727876106 | 0.67477876 | 1.84029851 | 0.4552239 |
| A_55_P2028 | 159.4 Detected   | 165.5 Detected   | 289 Detected     | 434.8 Detected    | Rnft2         | 2.727728984 | 1.81304893 | 2.62719033 | 1.7462236 |
| A_55_P2068 | 223.5 Detected   | 325.4 Detected   | 346.1 Detected   | 609.4 Detected    | Atp7b         | 2.726621924 | 1.54854586 | 1.87277197 | 1.063614  |
| A_52_P4179 | 107.2 Detected   | 156.6 Detected   | 94 Detected      | 292.2 Detected    | Zfp868        | 2.725746269 | 0.87686567 | 1.86590038 | 0.6002554 |
| A_51_P4676 | 592.8 Detected   | 329.5 Detected   | 1589.5 Detected  | 1615.2 Detected   | Ick           | 2.724696356 | 2.68134278 | 4.90197269 | 4.8239757 |
| A_51_P4398 | 2271.8 Detected  | 4407.6 Detected  | 2845.1 Detected  | 6183.7 Detected   | Gipc1         | 2.721938551 | 1.25235496 | 1.40296306 | 0.6454987 |
| A_51_P2079 | 194.2 Detected   | 549.4 Detected   | 7.2 Not Detect   | 528.6 Detected    | Tmem117       | 2.721936148 | 0.03707518 | 0.96214052 | 0.0131052 |
| A_51_P2927 | 15610.9 Detected | 16513.7 Detected | 31499.1 Detected | 42457 Detected    | Acbd4         | 2.719702259 | 2.01776323 | 2.57101679 | 1.9074526 |
| A_55_P1988 | 47.7 Detected    | 111.7 Detected   | 99.8 Detected    | 129.6 Detected    | Ty3           | 2.716981132 | 2.09224319 | 1.16025067 | 0.8934646 |
| A_55_P1978 | 7 Not Detect     | 19.8 Detected    | 11 Not Detect    | 19 Not Detect     | C530043A13Rik | 2.714285714 | 1.57142857 | 0.95959596 | 0.5555556 |
| A_55_P2104 | 1056.9 Detected  | 1038.8 Detected  | 1132.2 Detected  | 2868.7 Detected   | Inadl         | 2.714258681 | 1.0712461  | 2.76155179 | 1.0899114 |
| A_66_P1143 | 23.4 Detected    | 14.5 Not Detect  | 17.4 Detected    | 63.5 Detected     | Olf1r1168     | 2.713675214 | 0.74358974 | 4.37931034 | 1.2       |
| A_55_P2002 | 3.8 Not Detect   | 93.8 Detected    | 3.7 Not Detect   | 10.3 Not Detect   | Msx3          | 2.710526316 | 0.97368421 | 0.1098081  | 0.0394456 |

|            |         |            |          |            |          |            |          |            |               |             |            |            |           |
|------------|---------|------------|----------|------------|----------|------------|----------|------------|---------------|-------------|------------|------------|-----------|
| A_55_P2017 | 65335.6 | Detected   | 165344.7 | Detected   | 192651.5 | Detected   | 176943.8 | Detected   | Clu           | 2.70822951  | 2.94864515 | 1.07015102 | 1.1651507 |
| A_55_P2124 | 211.1   | Detected   | 480.7    | Detected   | 1979.2   | Detected   | 571.5    | Detected   | Npw           | 2.70724775  | 9.37565135 | 1.1888912  | 4.1173289 |
| A_55_P2002 | 138.3   | Detected   | 442.4    | Detected   | 223.4    | Detected   | 374.4    | Detected   | Coro1a        | 2.707158351 | 1.61532899 | 0.84629295 | 0.5049729 |
| A_55_P1997 | 604.3   | Detected   | 561.6    | Detected   | 838.8    | Detected   | 1635.1   | Detected   | Fam57a        | 2.705775277 | 1.38805229 | 2.91150285 | 1.4935897 |
| A_55_P1983 | 20.2    | Detected   | 22.8     | Detected   | 18       | Detected   | 54.6     | Detected   | Crybb3        | 2.702970297 | 0.89108911 | 2.39473684 | 0.7894737 |
| A_52_P2970 | 2314.1  | Detected   | 2400.4   | Detected   | 1819.8   | Detected   | 6252.3   | Detected   | Itpk1         | 2.701827924 | 0.78639644 | 2.60469088 | 0.7581236 |
| A_66_P1176 | 11.4    | Not Detect | 37       | Detected   | 3.7      | Not Detect | 30.8     | Not Detect | Gm16894       | 2.701754386 | 0.3245614  | 0.83243243 | 0.1       |
| A_55_P2237 | 19.1    | Detected   | 9.1      | Not Detect | 290.3    | Detected   | 51.6     | Detected   | Smarca1       | 2.701570681 | 15.1989529 | 5.67032967 | 31.901099 |
| A_55_P1954 | 23134   | Detected   | 29351.9  | Detected   | 34243.7  | Detected   | 62479.6  | Detected   | Gm20186       | 2.70076943  | 1.48023256 | 2.12863903 | 1.1666604 |
| A_55_P2088 | 19.3    | Detected   | 20.6     | Detected   | 36.5     | Detected   | 52.1     | Detected   | Gm16287       | 2.699481865 | 1.89119171 | 2.52912621 | 1.7718447 |
| A_55_P2169 | 3919.1  | Detected   | 7390.2   | Detected   | 6243.6   | Detected   | 10575.6  | Detected   | BC021767      | 2.698476691 | 1.59312087 | 1.43103028 | 0.8448486 |
| A_55_P2102 | 26.1    | Detected   | 25.8     | Detected   | 41.7     | Detected   | 70.4     | Detected   | 1810010H24Rik | 2.697318008 | 1.59770115 | 2.72868217 | 1.6162791 |
| A_55_P2060 | 864.5   | Detected   | 962.8    | Detected   | 965.7    | Detected   | 2329.8   | Detected   | Otub2         | 2.69496819  | 1.11706189 | 2.4198172  | 1.003012  |
| A_55_P1982 | 992.1   | Detected   | 2983.3   | Detected   | 1254.9   | Detected   | 2673.6   | Detected   | Sgsm1         | 2.694889628 | 1.26489265 | 0.89618878 | 0.4206416 |
| A_55_P2109 | 759.1   | Detected   | 843.6    | Detected   | 1003.9   | Detected   | 2045.6   | Detected   | Nipal3        | 2.694770123 | 1.32248716 | 2.4248459  | 1.190019  |
| A_66_P1207 | 130.7   | Detected   | 137.9    | Detected   | 252.7    | Detected   | 352.2    | Detected   | Ston2         | 2.694720735 | 1.93343535 | 2.55402466 | 1.8324873 |
| A_55_P2062 | 24.2    | Detected   | 29       | Detected   | 18       | Detected   | 65.2     | Detected   | BC030499      | 2.694214876 | 0.74380165 | 2.24827586 | 0.6206897 |
| A_55_P2094 | 14      | Detected   | 13.7     | Not Detect | 9.2      | Not Detect | 37.7     | Not Detect | Ms4a10        | 2.692857143 | 0.65714286 | 2.75182482 | 0.6715328 |
| A_55_P2097 | 206.7   | Detected   | 544.4    | Detected   | 334.4    | Detected   | 556.6    | Detected   | P4ha1         | 2.692791485 | 1.61780358 | 1.02240999 | 0.6142542 |
| A_52_P6372 | 74.1    | Detected   | 714.4    | Detected   | 3.4      | Not Detect | 199.5    | Detected   | Wipf1         | 2.692307692 | 0.04588394 | 0.27925532 | 0.0047592 |
| A_55_P2159 | 35.6    | Detected   | 43       | Detected   | 38.6     | Detected   | 95.8     | Detected   | Col14a1       | 2.691011236 | 1.08426966 | 2.22790698 | 0.8976744 |
| A_51_P2306 | 1148.3  | Detected   | 1435     | Detected   | 2483.5   | Detected   | 3089.9   | Detected   | Ccdc711       | 2.69084734  | 2.16276234 | 2.15324042 | 1.730662  |
| A_55_P2010 | 714.8   | Detected   | 561.7    | Detected   | 1361.6   | Detected   | 1921.8   | Detected   | Fahd1         | 2.688584219 | 1.90486849 | 3.42139932 | 2.4240698 |
| A_52_P1756 | 15.7    | Detected   | 26.5     | Detected   | 9.8      | Not Detect | 42.2     | Not Detect | A4gnt         | 2.687898089 | 0.62420382 | 1.59245283 | 0.3698113 |
| A_55_P1983 | 100.4   | Detected   | 179.9    | Detected   | 169.8    | Detected   | 269.6    | Detected   | Nr4a2         | 2.685258964 | 1.69123506 | 1.49861034 | 0.9438577 |
| A_55_P1959 | 8315.8  | Detected   | 9981.2   | Detected   | 14172.2  | Detected   | 22324.2  | Detected   | Tom111        | 2.684552298 | 1.70424974 | 2.23662485 | 1.4198894 |
| A_52_P3321 | 228     | Detected   | 504.7    | Detected   | 257.9    | Detected   | 611.6    | Detected   | Ddhd1         | 2.68245614  | 1.13114035 | 1.211809   | 0.5109966 |
| A_55_P2243 | 17.3    | Detected   | 7        | Not Detect | 13.1     | Not Detect | 46.4     | Not Detect | 9030405F24Rik | 2.682080925 | 0.75722543 | 6.62857143 | 1.8714286 |
| A_55_P2065 | 5072.1  | Detected   | 4886.2   | Detected   | 10695.2  | Detected   | 13596.8  | Detected   | Chac2         | 2.680704245 | 2.1086335  | 2.78269412 | 2.1888584 |
| A_55_P2005 | 21.9    | Detected   | 170.2    | Detected   | 28.5     | Detected   | 58.7     | Detected   | Trps1         | 2.680365297 | 1.30136986 | 0.34488837 | 0.1674501 |
| A_51_P1156 | 6300.6  | Detected   | 9362.6   | Detected   | 11515.4  | Detected   | 16883.2  | Detected   | Fam83h        | 2.679617814 | 1.82766721 | 1.80325978 | 1.2299361 |
| A_55_P2004 | 489.4   | Detected   | 268      | Detected   | 877.8    | Detected   | 1311     | Detected   | Ttc39a        | 2.678790356 | 1.79362485 | 4.89179104 | 3.2753731 |
| A_52_P3935 | 529.4   | Detected   | 683.6    | Detected   | 881.5    | Detected   | 1418.1   | Detected   | Clmp          | 2.67869286  | 1.66509256 | 2.07445875 | 1.2894968 |
| A_55_P2060 | 4093.3  | Detected   | 4235.9   | Detected   | 4309     | Detected   | 10962.7  | Detected   | Akap9         | 2.678205849 | 1.05269587 | 2.58804504 | 1.0172573 |
| A_52_P3164 | 4258.5  | Detected   | 2695.4   | Detected   | 8419.5   | Detected   | 11404.4  | Detected   | St3gal4       | 2.678032171 | 1.97710461 | 4.23106032 | 3.1236551 |
| A_66_P1253 | 175.6   | Detected   | 52.8     | Detected   | 56.2     | Detected   | 470.2    | Detected   | F830016B08Rik | 2.677676538 | 0.32004556 | 8.90530303 | 1.0643939 |
| A_55_P1975 | 9.6     | Not Detect | 16.7     | Detected   | 20       | Detected   | 25.7     | Not Detect | Sgcg          | 2.677083333 | 2.08333333 | 1.53892216 | 1.1976048 |
| A_55_P2058 | 32      | Detected   | 28.5     | Detected   | 26.3     | Detected   | 85.6     | Detected   | Dnajb5        | 2.675       | 0.821875   | 3.00350877 | 0.922807  |
| A_55_P2079 | 20.9    | Detected   | 39.9     | Detected   | 82.2     | Detected   | 55.9     | Detected   | Henmt1        | 2.674641148 | 3.93301435 | 1.40100251 | 2.0601504 |
| A_52_P4095 | 551.7   | Detected   | 410.4    | Detected   | 880.4    | Detected   | 1475.4   | Detected   | 5330426P16Rik | 2.6742795   | 1.59579482 | 3.59502924 | 2.1452242 |

|            |         |            |         |            |         |            |         |            |               |             |            |            |           |
|------------|---------|------------|---------|------------|---------|------------|---------|------------|---------------|-------------|------------|------------|-----------|
| A_51_P3725 | 12262.3 | Detected   | 33537.1 | Detected   | 24563   | Detected   | 32776.2 | Detected   | Cgref1        | 2.672924329 | 2.00313155 | 0.97731169 | 0.7324128 |
| A_52_P5841 | 642.3   | Detected   | 428.5   | Detected   | 2346.2  | Detected   | 1716.3  | Detected   | Frat1         | 2.672115834 | 3.65281021 | 4.00536756 | 5.4753792 |
| A_52_P1100 | 2986.6  | Detected   | 6160.9  | Detected   | 6888    | Detected   | 7978.6  | Detected   | 5730416F02Rik | 2.671465881 | 2.30630148 | 1.29503806 | 1.1180185 |
| A_55_P2075 | 15.5    | Detected   | 55      | Detected   | 15.5    | Not Detect | 41.4    | Not Detect | Gm904         | 2.670967742 | 1          | 0.75272727 | 0.2818182 |
| A_55_P2116 | 14049.5 | Detected   | 24480.1 | Detected   | 27792.8 | Detected   | 37477.8 | Detected   | D8Erd82e      | 2.667554005 | 1.97820563 | 1.53094963 | 1.1353222 |
| A_55_P2062 | 10.5    | Not Detect | 40      | Detected   | 28.5    | Detected   | 28      | Not Detect | Awat2         | 2.666666667 | 2.71428571 | 0.7        | 0.7125    |
| A_52_P1710 | 90.2    | Detected   | 166.3   | Detected   | 128.8   | Detected   | 240.3   | Detected   | Man1a         | 2.664079823 | 1.42793792 | 1.44497895 | 0.7745039 |
| A_52_P8172 | 23.2    | Detected   | 35.2    | Detected   | 16      | Not Detect | 61.8    | Detected   | Smim22        | 2.663793103 | 0.68965517 | 1.75568182 | 0.4545455 |
| A_55_P1988 | 1408.5  | Detected   | 1522.2  | Detected   | 1658    | Detected   | 3750.2  | Detected   | Cacna2d1      | 2.662548811 | 1.1771388  | 2.463671   | 1.089213  |
| A_52_P3251 | 4089.3  | Detected   | 4463.4  | Detected   | 7216.3  | Detected   | 10887.7 | Detected   | Gramd1b       | 2.662485022 | 1.76467855 | 2.43932876 | 1.616772  |
| A_52_P6726 | 664.3   | Detected   | 1344.9  | Detected   | 1032.9  | Detected   | 1768.2  | Detected   | Btc           | 2.66174921  | 1.55486979 | 1.31474459 | 0.7680125 |
| A_51_P4276 | 126     | Detected   | 117.5   | Detected   | 290.2   | Detected   | 335.3   | Detected   | BC018242      | 2.661111111 | 2.3031746  | 2.85361702 | 2.4697872 |
| A_55_P2092 | 4232.5  | Detected   | 9151.8  | Detected   | 9289.3  | Detected   | 11259.4 | Detected   | Nup210        | 2.660224454 | 2.19475487 | 1.23029349 | 1.0150244 |
| A_65_P1894 | 146.6   | Detected   | 107.5   | Detected   | 3.2     | Not Detect | 389.9   | Detected   | Ppm1h         | 2.659618008 | 0.0218281  | 3.62697674 | 0.0297674 |
| A_51_P3141 | 126     | Detected   | 191.4   | Detected   | 103.1   | Detected   | 335.1   | Detected   | Syne1         | 2.65952381  | 0.81825397 | 1.7507837  | 0.5386625 |
| A_51_P1493 | 251.3   | Detected   | 212.1   | Detected   | 527.4   | Detected   | 668.1   | Detected   | Fbxl20        | 2.658575408 | 2.09868683 | 3.14992928 | 2.4865629 |
| A_55_P2268 | 17.5    | Detected   | 24.2    | Detected   | 9.7     | Not Detect | 46.5    | Not Detect | 4930445G23Rik | 2.657142857 | 0.55428571 | 1.9214876  | 0.4008264 |
| A_65_P0644 | 1826.2  | Detected   | 4178.8  | Detected   | 4115.8  | Detected   | 4850.4  | Detected   | Tfrc          | 2.656007009 | 2.25375096 | 1.160716   | 0.9849239 |
| A_55_P2123 | 193.3   | Detected   | 824.1   | Detected   | 252.6   | Detected   | 513.3   | Detected   | Zfhx4         | 2.655457838 | 1.30677703 | 0.6228613  | 0.3065162 |
| A_51_P4777 | 348.8   | Detected   | 354.2   | Detected   | 503.8   | Detected   | 925.8   | Detected   | Rab3d         | 2.654243119 | 1.44438073 | 2.61377753 | 1.4223602 |
| A_65_P0183 | 1558.2  | Detected   | 1695.4  | Detected   | 2612.6  | Detected   | 4134.7  | Detected   | Lima1         | 2.653510461 | 1.67667822 | 2.43877551 | 1.5409933 |
| A_52_P7002 | 5637.3  | Detected   | 9134.9  | Detected   | 10812.9 | Detected   | 14956.9 | Detected   | Cox16         | 2.653202774 | 1.91809909 | 1.63733593 | 1.1836911 |
| A_55_P2099 | 94.5    | Detected   | 124.9   | Detected   | 109.7   | Detected   | 250.7   | Detected   | LOC101056691  | 2.652910053 | 1.16084656 | 2.00720576 | 0.8783026 |
| A_55_P2099 | 235     | Detected   | 308.1   | Detected   | 656     | Detected   | 623.4   | Detected   | Scd3          | 2.652765957 | 2.79148936 | 2.02336904 | 2.1291788 |
| A_51_P4400 | 2863.9  | Detected   | 7759    | Detected   | 9259.3  | Detected   | 7595.9  | Detected   | Lgalsl        | 2.652292329 | 3.2331087  | 0.97897925 | 1.1933625 |
| A_55_P2163 | 2926.7  | Detected   | 8676.4  | Detected   | 8090.8  | Detected   | 7760.2  | Detected   | Clec2f        | 2.651518775 | 2.76447876 | 0.89440321 | 0.9325066 |
| A_55_P2077 | 251.2   | Detected   | 292     | Detected   | 279.2   | Detected   | 665.9   | Detected   | Kat6b         | 2.650875796 | 1.11146497 | 2.28047945 | 0.9561644 |
| A_51_P1389 | 179.9   | Detected   | 108.6   | Detected   | 571.6   | Detected   | 476.6   | Detected   | Peg12         | 2.649249583 | 3.17732073 | 4.38858195 | 5.2633517 |
| A_55_P1964 | 49.7    | Detected   | 27.1    | Detected   | 27.9    | Detected   | 131.6   | Detected   | Gm10398       | 2.647887324 | 0.56136821 | 4.85608856 | 1.0295203 |
| A_51_P3271 | 254.3   | Detected   | 138     | Detected   | 370.5   | Detected   | 673     | Detected   | Was           | 2.646480535 | 1.45694062 | 4.87681159 | 2.6847826 |
| A_51_P4302 | 645.5   | Detected   | 1364.7  | Detected   | 1262.5  | Detected   | 1708    | Detected   | 1700009P17Rik | 2.646010844 | 1.95584818 | 1.25155712 | 0.9251117 |
| A_55_P2014 | 260.9   | Detected   | 352.3   | Detected   | 40.6    | Detected   | 689.9   | Detected   | Sema5a        | 2.644308164 | 0.15561518 | 1.9582742  | 0.1152427 |
| A_55_P1980 | 7.8     | Not Detect | 10.1    | Not Detect | 38.2    | Detected   | 20.6    | Not Detect | Plcb1         | 2.641025641 | 4.8974359  | 2.03960396 | 3.7821782 |
| A_55_P2220 | 26.5    | Detected   | 35.2    | Detected   | 31.7    | Detected   | 69.9    | Detected   | B230303O12Rik | 2.637735849 | 1.19622642 | 1.98579545 | 0.9005682 |
| A_52_P5988 | 591.5   | Detected   | 627.4   | Detected   | 908     | Detected   | 1559.9  | Detected   | Ccdc71l       | 2.637193576 | 1.5350803  | 2.48629264 | 1.4472426 |
| A_51_P4178 | 23.7    | Detected   | 40.3    | Detected   | 19.4    | Detected   | 62.5    | Detected   | Trim10        | 2.637130802 | 0.8185654  | 1.55086849 | 0.4813896 |
| A_51_P4400 | 75.4    | Detected   | 101.8   | Detected   | 194.1   | Detected   | 198.7   | Detected   | Fam187b       | 2.635278515 | 2.57427056 | 1.9518664  | 1.9066798 |
| A_51_P3841 | 198.7   | Detected   | 354.2   | Detected   | 508.9   | Detected   | 523.6   | Detected   | Acad12        | 2.635128334 | 2.56114746 | 1.47826087 | 1.4367589 |
| A_51_P5209 | 150.1   | Detected   | 334.1   | Detected   | 807     | Detected   | 395.3   | Detected   | Icosl         | 2.633577615 | 5.37641572 | 1.18317869 | 2.4154445 |
| A_51_P3612 | 9434.5  | Detected   | 15700.9 | Detected   | 10915.8 | Detected   | 24840.7 | Detected   | Atp6v0d1      | 2.632964121 | 1.15700885 | 1.5821195  | 0.695234  |

|            |                 |                  |                  |                  |               |             |            |            |           |
|------------|-----------------|------------------|------------------|------------------|---------------|-------------|------------|------------|-----------|
| A_55_P1966 | 75.7 Detected   | 305.9 Detected   | 320.2 Detected   | 199.3 Detected   | Plac9a        | 2.632760898 | 4.22985469 | 0.6515201  | 1.0467473 |
| A_55_P2093 | 120.5 Detected  | 349.5 Detected   | 427.8 Detected   | 317.1 Detected   | Xrcc6bp1      | 2.63153527  | 3.55020747 | 0.90729614 | 1.2240343 |
| A_55_P1984 | 13 Not Detect   | 33 Detected      | 13 Not Detect    | 34.2 Not Detect  | Stxbp5        | 2.630769231 | 1          | 1.03636364 | 0.3939394 |
| A_55_P2006 | 103.8 Detected  | 89.9 Detected    | 103 Detected     | 273 Detected     | Olf482        | 2.630057803 | 0.99229287 | 3.03670745 | 1.1457175 |
| A_66_P1258 | 2129 Detected   | 3521.7 Detected  | 4683.9 Detected  | 5596.5 Detected  | A930005H10Rik | 2.62869892  | 2.20004697 | 1.58914729 | 1.3300111 |
| A_55_P2015 | 2382 Detected   | 2386.8 Detected  | 1799.6 Detected  | 6260.6 Detected  | Evi5l         | 2.62829555  | 0.75549958 | 2.62300989 | 0.7539802 |
| A_51_P4298 | 12.6 Not Detect | 10 Not Detect    | 23.8 Detected    | 33.1 Not Detect  | Msh5          | 2.626984127 | 1.88888889 | 3.31       | 2.38      |
| A_55_P2049 | 9668.1 Detected | 20746.6 Detected | 19204.6 Detected | 25382 Detected   | H2-K1         | 2.625334864 | 1.98638823 | 1.22342938 | 0.9256746 |
| A_51_P3584 | 51.1 Detected   | 66.6 Detected    | 96.8 Detected    | 134.1 Detected   | Ppp1r32       | 2.624266145 | 1.89432485 | 2.01351351 | 1.4534535 |
| A_51_P1345 | 2230.3 Detected | 4538.4 Detected  | 3721.9 Detected  | 5850.4 Detected  | Coq9          | 2.623144868 | 1.66878895 | 1.28908867 | 0.8200908 |
| A_51_P4225 | 490.9 Detected  | 617.9 Detected   | 826.2 Detected   | 1287 Detected    | Paqr8         | 2.621715217 | 1.68303117 | 2.0828613  | 1.3371096 |
| A_66_P1040 | 52.2 Detected   | 58.5 Detected    | 74.1 Detected    | 136.7 Detected   | Tdp1          | 2.618773946 | 1.41954023 | 2.33675214 | 1.2666667 |
| A_66_P1130 | 44.3 Detected   | 56.9 Detected    | 32.2 Detected    | 116 Detected     | Pla2g2e       | 2.618510158 | 0.7268623  | 2.03866432 | 0.5659051 |
| A_52_P5571 | 62.4 Detected   | 142.4 Detected   | 129.4 Detected   | 163.3 Detected   | Slc12a5       | 2.616987179 | 2.07371795 | 1.14676966 | 0.9087079 |
| A_55_P2172 | 15.3 Detected   | 10.4 Not Detect  | 13.6 Not Detect  | 40 Not Detect    | Tm4sf19       | 2.614379085 | 0.88888889 | 3.84615385 | 1.3076923 |
| A_51_P3898 | 989 Detected    | 849.8 Detected   | 760.9 Detected   | 2584.3 Detected  | B3gnt9        | 2.613043478 | 0.76936299 | 3.04106849 | 0.8953871 |
| A_51_P1154 | 131.1 Detected  | 372.3 Detected   | 348.9 Detected   | 342.4 Detected   | Apol8         | 2.611746758 | 2.66132723 | 0.91968842 | 0.9371475 |
| A_55_P2072 | 16.2 Detected   | 32.8 Detected    | 36.9 Detected    | 42.3 Not Detect  | Gm8777        | 2.611111111 | 2.27777778 | 1.28963415 | 1.125     |
| A_55_P2178 | 20.4 Detected   | 25.6 Detected    | 66.1 Detected    | 53.2 Detected    | Gm10489       | 2.607843137 | 3.24019608 | 2.078125   | 2.5820313 |
| A_55_P1975 | 496.8 Detected  | 758 Detected     | 619.4 Detected   | 1293.5 Detected  | Olf629        | 2.603663446 | 1.24677939 | 1.70646438 | 0.8171504 |
| A_55_P1958 | 4340.4 Detected | 2590.5 Detected  | 6368.1 Detected  | 11296.3 Detected | Itga6         | 2.602594231 | 1.46716892 | 4.36066396 | 2.4582513 |
| A_55_P2029 | 66.9 Detected   | 57.1 Detected    | 61.7 Detected    | 174.1 Detected   | Atr           | 2.602391629 | 0.92227205 | 3.04903678 | 1.0805604 |
| A_55_P2185 | 2333.4 Detected | 373.2 Detected   | 6084.2 Detected  | 6070.3 Detected  | Cyp3a13       | 2.601482815 | 2.60743979 | 16.2655413 | 16.302787 |
| A_55_P1994 | 94.8 Detected   | 119.1 Detected   | 117.7 Detected   | 246.5 Detected   | Ufm1          | 2.60021097  | 1.24156118 | 2.06968934 | 0.9882452 |
| A_55_P2269 | 24 Detected     | 27.6 Detected    | 7.5 Not Detect   | 62.4 Detected    | BB116930      | 2.6         | 0.3125     | 2.26086957 | 0.2717391 |
| A_51_P3940 | 19.9 Detected   | 30.5 Detected    | 37.5 Detected    | 51.7 Detected    | Qprt          | 2.59798995  | 1.88442211 | 1.69508197 | 1.2295082 |
| A_55_P2001 | 941.8 Detected  | 1412 Detected    | 876.2 Detected   | 2446.4 Detected  | Pex1          | 2.597579104 | 0.93034615 | 1.7325779  | 0.6205382 |
| A_52_P3505 | 3554.1 Detected | 3475.6 Detected  | 6664.3 Detected  | 9224.6 Detected  | Mtmr11        | 2.595481275 | 1.87510199 | 2.65410289 | 1.9174531 |
| A_55_P2028 | 2230.3 Detected | 4114.8 Detected  | 3940.2 Detected  | 5784.7 Detected  | Sgsh          | 2.593686948 | 1.76666816 | 1.40582774 | 0.9575678 |
| A_55_P2012 | 556.3 Detected  | 636.5 Detected   | 1020 Detected    | 1442.8 Detected  | Zfp618        | 2.593564623 | 1.83354305 | 2.26677141 | 1.6025137 |
| A_51_P4611 | 408.6 Detected  | 150.7 Detected   | 453.9 Detected   | 1059.7 Detected  | Osbpl10       | 2.593489966 | 1.11086637 | 7.03185136 | 3.0119443 |
| A_55_P2114 | 33.1 Detected   | 26.5 Detected    | 33.5 Detected    | 85.8 Detected    | Creb1         | 2.592145015 | 1.01208459 | 3.23773585 | 1.2641509 |
| A_55_P2021 | 11.5 Not Detect | 3.2 Not Detect   | 43.1 Detected    | 29.8 Not Detect  | A630077J23Rik | 2.591304348 | 3.74782609 | 9.3125     | 13.46875  |
| A_55_P2364 | 161.6 Detected  | 7.8 Not Detect   | 398.2 Detected   | 418.7 Detected   | Mcpt-ps1      | 2.590965347 | 2.46410891 | 53.6794872 | 51.051282 |
| A_55_P2046 | 33.4 Detected   | 89.1 Detected    | 62.4 Detected    | 86.5 Detected    | Arhgap42      | 2.589820359 | 1.86826347 | 0.9708193  | 0.7003367 |
| A_55_P2072 | 309.7 Detected  | 575.5 Detected   | 482.8 Detected   | 802 Detected     | Dnaaf3        | 2.589602841 | 1.55892799 | 1.39357081 | 0.8389227 |
| A_52_P6791 | 6866.1 Detected | 10558.8 Detected | 8251.2 Detected  | 17778.3 Detected | Prss23        | 2.589286495 | 1.20173024 | 1.68374247 | 0.7814524 |
| A_55_P2086 | 38 Detected     | 41.2 Detected    | 35 Detected      | 98.3 Detected    | Bglap3        | 2.586842105 | 0.92105263 | 2.38592233 | 0.8495146 |
| A_51_P1690 | 4135.2 Detected | 6942.2 Detected  | 5633.4 Detected  | 10696.9 Detected | Gls2          | 2.586791449 | 1.36230412 | 1.5408516  | 0.8114719 |
| A_55_P2233 | 61.6 Detected   | 54.2 Detected    | 64.8 Detected    | 159.2 Detected   | 4930572J10Rik | 2.584415584 | 1.05194805 | 2.93726937 | 1.195572  |

|            |                  |                  |                  |                  |               |             |            |            |           |
|------------|------------------|------------------|------------------|------------------|---------------|-------------|------------|------------|-----------|
| A_55_P2091 | 119.1 Detected   | 244.4 Detected   | 97.1 Detected    | 307.8 Detected   | Krtap1-4      | 2.584382872 | 0.81528128 | 1.2594108  | 0.3972995 |
| A_52_P4802 | 55.3 Detected    | 34.9 Detected    | 41.3 Detected    | 142.9 Detected   | Atat1         | 2.584086799 | 0.74683544 | 4.09455587 | 1.1833811 |
| A_52_P1146 | 784.9 Detected   | 1247.9 Detected  | 1316.8 Detected  | 2026.7 Detected  | Elmo3         | 2.582112371 | 1.67766594 | 1.62408847 | 1.0552128 |
| A_55_P1988 | 247 Detected     | 317.2 Detected   | 344.4 Detected   | 637.7 Detected   | Slc7a3        | 2.581781377 | 1.39433198 | 2.01040353 | 1.0857503 |
| A_55_P1981 | 1026.1 Detected  | 2020.3 Detected  | 1939.7 Detected  | 2648.1 Detected  | H2-BI         | 2.580742618 | 1.89036156 | 1.31074593 | 0.9601049 |
| A_51_P2933 | 3114.8 Detected  | 2811.5 Detected  | 4487.9 Detected  | 8035 Detected    | Tob1          | 2.579619879 | 1.44083087 | 2.85790503 | 1.5962653 |
| A_51_P2998 | 488.8 Detected   | 636.2 Detected   | 383.2 Detected   | 1260.7 Detected  | Slc46a3       | 2.579173486 | 0.78396072 | 1.98160956 | 0.6023263 |
| A_55_P2028 | 3.8 Not Detect   | 53.5 Detected    | 8.5 Not Detect   | 9.8 Not Detect   | Olf1r1250     | 2.578947368 | 2.23684211 | 0.18317757 | 0.1588785 |
| A_55_P2174 | 557.5 Detected   | 9684.1 Detected  | 586 Detected     | 1436.7 Detected  | Urah          | 2.577040359 | 1.05112108 | 0.14835658 | 0.0605116 |
| A_55_P2159 | 311.3 Detected   | 382.1 Detected   | 758.1 Detected   | 802.2 Detected   | Reep6         | 2.576935432 | 2.43527144 | 2.09945041 | 1.9840356 |
| A_52_P2238 | 23.3 Detected    | 37.5 Detected    | 31.2 Detected    | 60 Detected      | 6430548M08Rik | 2.575107296 | 1.33905579 | 1.6        | 0.832     |
| A_51_P5104 | 9.8 Not Detect   | 34.6 Detected    | 16.2 Not Detect  | 25.2 Not Detect  | Atpaf1        | 2.571428571 | 1.65306122 | 0.7283237  | 0.4682081 |
| A_55_P2018 | 73.4 Detected    | 185.2 Detected   | 82.5 Detected    | 188.6 Detected   | Abcg4         | 2.569482289 | 1.1239782  | 1.01835853 | 0.4454644 |
| A_55_P1997 | 3.7 Not Detect   | 42.4 Detected    | 8.5 Not Detect   | 9.5 Not Detect   | Osbp2         | 2.567567568 | 2.2972973  | 0.2240566  | 0.2004717 |
| A_55_P2037 | 11981.4 Detected | 36634.9 Detected | 34964 Detected   | 30762.3 Detected | Acp5          | 2.567504632 | 2.91818986 | 0.8396993  | 0.9543905 |
| A_55_P2177 | 1511 Detected    | 3840.2 Detected  | 3056.4 Detected  | 3879 Detected    | Cradd         | 2.567174057 | 2.02276638 | 1.01010364 | 0.795896  |
| A_55_P2158 | 19.4 Detected    | 14.9 Not Detect  | 37.3 Detected    | 49.8 Not Detect  | Lama2         | 2.567010309 | 1.92268041 | 3.34228188 | 2.5033557 |
| A_55_P2007 | 5.3 Not Detect   | 3.8 Not Detect   | 25.1 Detected    | 13.6 Not Detect  | Abca15        | 2.566037736 | 4.73584906 | 3.57894737 | 6.6052632 |
| A_55_P2086 | 1066.5 Detected  | 1126.9 Detected  | 1339.7 Detected  | 2735.3 Detected  | Sp140         | 2.564744491 | 1.25616503 | 2.42727837 | 1.1888366 |
| A_55_P2002 | 98.7 Detected    | 146.4 Detected   | 397.1 Detected   | 253.1 Detected   | Aifm3         | 2.564336373 | 4.02330294 | 1.72882514 | 2.7124317 |
| A_51_P4324 | 3.9 Not Detect   | 4.1 Not Detect   | 45.9 Detected    | 10 Not Detect    | Fgfr2         | 2.564102564 | 11.7692308 | 2.43902439 | 11.195122 |
| A_55_P1980 | 127.2 Detected   | 125.7 Detected   | 124.4 Detected   | 326.1 Detected   | Cbx7          | 2.563679245 | 0.97798742 | 2.59427208 | 0.9896579 |
| A_55_P2334 | 35.6 Detected    | 37.9 Detected    | 36.5 Detected    | 91.2 Detected    | 4933428C20Rik | 2.561797753 | 1.0252809  | 2.40633245 | 0.9630607 |
| A_52_P1841 | 6268.4 Detected  | 8325.1 Detected  | 11487.7 Detected | 16052.1 Detected | Mthfd2        | 2.560797014 | 1.83263672 | 1.92815702 | 1.3798873 |
| A_55_P1991 | 170.8 Detected   | 161 Detected     | 262.7 Detected   | 437.2 Detected   | Gm10910       | 2.55971897  | 1.53805621 | 2.71552795 | 1.631677  |
| A_55_P2159 | 10491.1 Detected | 13326.5 Detected | 27253.7 Detected | 26847.9 Detected | Reep6         | 2.559112009 | 2.59779241 | 2.014625   | 2.0450756 |
| A_55_P2139 | 3479.8 Detected  | 5044.1 Detected  | 4838.8 Detected  | 8904.9 Detected  | B3gnt3        | 2.559026381 | 1.39053969 | 1.76540909 | 0.959299  |
| A_55_P2055 | 8006.2 Detected  | 2959.4 Detected  | 13033.8 Detected | 20480 Detected   | Slc16a6       | 2.558017536 | 1.62796333 | 6.92032169 | 4.4042036 |
| A_51_P2722 | 3674.5 Detected  | 5019.5 Detected  | 13768.6 Detected | 9396.2 Detected  | Cmb1          | 2.557137025 | 3.74706763 | 1.87193944 | 2.7430222 |
| A_55_P1975 | 43.7 Detected    | 31.2 Detected    | 42 Detected      | 111.7 Detected   | Rhox2e        | 2.556064073 | 0.9610984  | 3.58012821 | 1.3461538 |
| A_51_P4634 | 7043.4 Detected  | 11493.9 Detected | 9907.9 Detected  | 18001.4 Detected | Elovl6        | 2.555782719 | 1.40669279 | 1.56616988 | 0.8620138 |
| A_52_P4027 | 61.4 Detected    | 446.3 Detected   | 158.1 Detected   | 156.8 Detected   | Prom1         | 2.553745928 | 2.57491857 | 0.35133318 | 0.354246  |
| A_52_P1709 | 632.7 Detected   | 1168 Detected    | 1818.8 Detected  | 1614.9 Detected  | Mpp7          | 2.5523945   | 2.87466414 | 1.38261986 | 1.5571918 |
| A_52_P2297 | 728.7 Detected   | 1133.7 Detected  | 1271 Detected    | 1859.4 Detected  | Ptgr2         | 2.551667353 | 1.744202   | 1.64011643 | 1.1211079 |
| A_55_P2100 | 59.5 Detected    | 196.7 Detected   | 814.3 Detected   | 151.8 Detected   | Ptgd5         | 2.551260504 | 13.6857143 | 0.7717336  | 4.1398068 |
| A_51_P2784 | 736.4 Detected   | 1411.8 Detected  | 1372.9 Detected  | 1877.7 Detected  | 3830406C13Rik | 2.549837045 | 1.86434003 | 1.33000425 | 0.9724465 |
| A_51_P2790 | 415.2 Detected   | 901 Detected     | 162.2 Detected   | 1058.2 Detected  | Ppargc1a      | 2.548651252 | 0.39065511 | 1.17447281 | 0.1800222 |
| A_55_P1988 | 348.3 Detected   | 561.9 Detected   | 585.9 Detected   | 887.5 Detected   | Upp1          | 2.548090726 | 1.68217054 | 1.57946254 | 1.0427122 |
| A_51_P1167 | 14.6 Detected    | 21.1 Detected    | 7.4 Not Detect   | 37.2 Not Detect  | Crygc         | 2.547945205 | 0.50684932 | 1.76303318 | 0.3507109 |
| A_52_P2576 | 201.5 Detected   | 635.9 Detected   | 429.6 Detected   | 513.3 Detected   | Rwdd3         | 2.547394541 | 2.13200993 | 0.80720239 | 0.6755779 |

|            |         |            |         |            |         |            |          |            |               |             |            |            |           |
|------------|---------|------------|---------|------------|---------|------------|----------|------------|---------------|-------------|------------|------------|-----------|
| A_55_P1998 | 42360.6 | Detected   | 76974.4 | Detected   | 94369.3 | Detected   | 107847.1 | Detected   | Capg          | 2.545929472 | 2.22776117 | 1.4010775  | 1.2259829 |
| A_66_P1363 | 7.7     | Not Detect | 16.7    | Not Detect | 20.9    | Detected   | 19.6     | Not Detect | Bmpr1b        | 2.545454545 | 2.71428571 | 1.17365269 | 1.251497  |
| A_55_P2103 | 81.9    | Detected   | 140.6   | Detected   | 99.9    | Detected   | 207.9    | Detected   | Ccr8          | 2.538461538 | 1.21978022 | 1.47866287 | 0.7105263 |
| A_52_P5799 | 561.2   | Detected   | 183.4   | Detected   | 852     | Detected   | 1423.8   | Detected   | Slc16a6       | 2.537063435 | 1.51817534 | 7.76335878 | 4.6455834 |
| A_66_P1361 | 33.8    | Detected   | 45.6    | Detected   | 42.3    | Detected   | 85.7     | Detected   | Lefty2        | 2.535502959 | 1.25147929 | 1.87938596 | 0.9276316 |
| A_55_P1979 | 17.6    | Detected   | 63.3    | Detected   | 46.3    | Detected   | 44.6     | Not Detect | Prcp          | 2.534090909 | 2.63068182 | 0.70458136 | 0.7314376 |
| A_51_P2040 | 4365.3  | Detected   | 6723.5  | Detected   | 6012.6  | Detected   | 11056.2  | Detected   | Hk2           | 2.53274689  | 1.37736238 | 1.64441139 | 0.8942664 |
| A_55_P2111 | 94.8    | Detected   | 99.1    | Detected   | 160.3   | Detected   | 240.1    | Detected   | Prss35        | 2.532700422 | 1.69092827 | 2.42280525 | 1.617558  |
| A_51_P3248 | 4669.7  | Detected   | 1468.3  | Detected   | 12503.5 | Detected   | 11821.1  | Detected   | Evpl          | 2.531447416 | 2.677581   | 8.05087516 | 8.5156303 |
| A_51_P3079 | 17055.7 | Detected   | 21122.7 | Detected   | 31462.2 | Detected   | 43151.9  | Detected   | Krt13         | 2.5300574   | 1.84467363 | 2.04291592 | 1.4894971 |
| A_55_P2185 | 28.3    | Detected   | 15      | Not Detect | 37      | Detected   | 71.6     | Detected   | Ascl3         | 2.530035336 | 1.30742049 | 4.77333333 | 2.4666667 |
| A_52_P9383 | 2426.6  | Detected   | 2684.5  | Detected   | 997     | Detected   | 6136.3   | Detected   | Mme           | 2.528764526 | 0.41086294 | 2.28582604 | 0.3713913 |
| A_55_P2024 | 21      | Detected   | 17.2    | Detected   | 18      | Detected   | 53.1     | Detected   | Vmn1r62       | 2.528571429 | 0.85714286 | 3.0872093  | 1.0465116 |
| A_55_P1987 | 673.6   | Detected   | 608.6   | Detected   | 473.2   | Detected   | 1702.3   | Detected   | Chpf2         | 2.527167458 | 0.70249406 | 2.79707525 | 0.7775222 |
| A_51_P2651 | 332.8   | Detected   | 342.2   | Detected   | 318.1   | Detected   | 840.6    | Detected   | Arhgef10      | 2.525841346 | 0.95582933 | 2.45645821 | 0.9295733 |
| A_52_P2201 | 277.7   | Detected   | 218.7   | Detected   | 444.2   | Detected   | 701.2    | Detected   | 5830454E08Rik | 2.525027008 | 1.59956788 | 3.20621856 | 2.0310928 |
| A_51_P4551 | 4       | Not Detect | 3.6     | Not Detect | 64      | Detected   | 10.1     | Not Detect | Prl4a1        | 2.525       | 16         | 2.80555556 | 17.777778 |
| A_55_P1992 | 20.2    | Detected   | 36      | Detected   | 38      | Detected   | 51       | Detected   | Ptpru         | 2.524752475 | 1.88118812 | 1.41666667 | 1.0555556 |
| A_55_P1959 | 42604.8 | Detected   | 45043.5 | Detected   | 84805.4 | Detected   | 107531.2 | Detected   | Asns          | 2.523922187 | 1.99051281 | 2.38727452 | 1.8827445 |
| A_55_P2429 | 658.7   | Detected   | 1818.8  | Detected   | 1680.1  | Detected   | 1662.5   | Detected   | Psrc1         | 2.523910733 | 2.55063003 | 0.91406422 | 0.9237409 |
| A_55_P2077 | 19.1    | Detected   | 47.2    | Detected   | 31.5    | Detected   | 48.2     | Detected   | Prkag3        | 2.523560209 | 1.64921466 | 1.02118644 | 0.6673729 |
| A_55_P1963 | 8.6     | Not Detect | 13.8    | Not Detect | 33.5    | Detected   | 21.7     | Not Detect | Chchd7        | 2.523255814 | 3.89534884 | 1.57246377 | 2.4275362 |
| A_55_P2073 | 428.6   | Detected   | 166.7   | Detected   | 100.7   | Detected   | 1079.5   | Compromis  | Unc79         | 2.518665422 | 0.234951   | 6.47570486 | 0.6040792 |
| A_52_P9505 | 16.2    | Detected   | 54.7    | Detected   | 25.5    | Detected   | 40.8     | Not Detect | Rsph10b       | 2.518518519 | 1.57407407 | 0.74588665 | 0.4661792 |
| A_51_P3965 | 323.2   | Detected   | 788.4   | Detected   | 279.1   | Detected   | 813.8    | Detected   | Plod2         | 2.517945545 | 0.86355198 | 1.03221715 | 0.3540081 |
| A_55_P2063 | 14.9    | Not Detect | 25.4    | Detected   | 28.4    | Detected   | 37.5     | Not Detect | Tnk2os        | 2.516778523 | 1.90604027 | 1.47637795 | 1.1181102 |
| A_55_P2108 | 355.6   | Detected   | 444.5   | Detected   | 459.4   | Detected   | 894.5    | Detected   | Nufip1        | 2.515466817 | 1.29190101 | 2.01237345 | 1.0335208 |
| A_55_P1968 | 90.2    | Detected   | 258.6   | Detected   | 190.1   | Detected   | 226.8    | Detected   | Cradd         | 2.514412417 | 2.1075388  | 0.87703016 | 0.7351121 |
| A_52_P4940 | 3.5     | Not Detect | 45.2    | Detected   | 4.4     | Not Detect | 8.8      | Not Detect | Gm14047       | 2.514285714 | 1.25714286 | 0.19469027 | 0.0973451 |
| A_51_P1216 | 7.2     | Not Detect | 17.4    | Detected   | 21.4    | Detected   | 18.1     | Not Detect | 4930546C10Rik | 2.513888889 | 2.97222222 | 1.04022989 | 1.2298851 |
| A_55_P2029 | 300.7   | Detected   | 427.1   | Detected   | 284.8   | Detected   | 755.8    | Detected   | Pde4a         | 2.513468573 | 0.94712338 | 1.76960899 | 0.6668228 |
| A_55_P2011 | 307.2   | Detected   | 168.1   | Detected   | 1255.2  | Detected   | 772.1    | Detected   | Pdk2          | 2.513346354 | 4.0859375  | 4.59309935 | 7.4669839 |
| A_55_P2146 | 38.6    | Detected   | 67.6    | Detected   | 16.9    | Detected   | 97       | Detected   | Gm10808       | 2.512953368 | 0.43782383 | 1.43491124 | 0.25      |
| A_51_P4987 | 865.3   | Detected   | 848.2   | Detected   | 1081.4  | Detected   | 2174     | Detected   | Cacna2d1      | 2.512423437 | 1.24973997 | 2.56307475 | 1.2749352 |
| A_55_P2042 | 61.7    | Detected   | 39.8    | Detected   | 85.6    | Detected   | 154.7    | Detected   | Gm3004        | 2.507293355 | 1.38735818 | 3.88693467 | 2.1507538 |
| A_55_P2150 | 34.7    | Detected   | 22.7    | Detected   | 37      | Detected   | 87       | Detected   | Foxo3         | 2.507204611 | 1.06628242 | 3.83259912 | 1.6299559 |
| A_55_P2022 | 1583.3  | Detected   | 2916.7  | Detected   | 6261.2  | Detected   | 3967.6   | Detected   | Exoc3l4       | 2.505905387 | 3.95452536 | 1.36030445 | 2.1466726 |
| A_55_P2153 | 18.4    | Detected   | 10.5    | Not Detect | 49.3    | Detected   | 46.1     | Detected   | Fmo1          | 2.505434783 | 2.67934783 | 4.39047619 | 4.6952381 |
| A_51_P3155 | 12019.7 | Detected   | 14760.2 | Detected   | 32678.6 | Detected   | 30069.1  | Detected   | Nars          | 2.501651456 | 2.71875338 | 2.03717429 | 2.2139673 |
| A_55_P2148 | 694.4   | Detected   | 697.6   | Detected   | 776.9   | Detected   | 1737.1   | Detected   | Nipal3        | 2.501584101 | 1.1188076  | 2.49010894 | 1.1136755 |



|            |                  |                  |                  |                  |               |             |            |            |           |
|------------|------------------|------------------|------------------|------------------|---------------|-------------|------------|------------|-----------|
| A_52_P4639 | 30 Detected      | 27.6 Detected    | 38.1 Detected    | 75 Detected      | Krtap16-3     | 2.5         | 1.27       | 2.7173913  | 1.3804348 |
| A_51_P1140 | 5.6 Not Detect   | 28 Detected      | 18.6 Detected    | 14 Not Detect    | Gstm7         | 2.5         | 3.32142857 | 0.5        | 0.6642857 |
| A_55_P2131 | 93.2 Detected    | 40.2 Detected    | 167.5 Detected   | 232.9 Detected   | Ttc39a        | 2.498927039 | 1.7972103  | 5.79353234 | 4.1666667 |
| A_55_P2159 | 283.3 Detected   | 223.4 Detected   | 137.4 Detected   | 707.8 Detected   | Adamts4       | 2.498411578 | 0.48499824 | 3.16830797 | 0.6150403 |
| A_51_P3736 | 167.4 Detected   | 196.9 Detected   | 228.2 Detected   | 418.2 Detected   | Maml2         | 2.498207885 | 1.36320191 | 2.12392077 | 1.1589639 |
| A_55_P2050 | 1969.7 Detected  | 1895.7 Detected  | 1745.3 Detected  | 4918.6 Detected  | Prmp5         | 2.497131543 | 0.88607402 | 2.59460885 | 0.9206626 |
| A_55_P2363 | 2293.4 Detected  | 3516 Detected    | 3254.2 Detected  | 5726.8 Detected  | Cmtm4         | 2.497078573 | 1.41894131 | 1.62878271 | 0.9255404 |
| A_52_P2601 | 95.5 Detected    | 123.8 Detected   | 132.5 Detected   | 238.4 Detected   | Man1a         | 2.496335079 | 1.38743455 | 1.92568659 | 1.0702746 |
| A_52_P6674 | 308.9 Detected   | 285.2 Detected   | 479.8 Detected   | 771 Detected     | Fyco1         | 2.495953383 | 1.55325348 | 2.70336606 | 1.6823282 |
| A_51_P1915 | 12630.6 Detected | 10297.3 Detected | 28714.5 Detected | 31521.9 Detected | Stard10       | 2.495677165 | 2.27340744 | 3.06118109 | 2.7885465 |
| A_51_P3616 | 86.7 Detected    | 136.8 Detected   | 85.8 Detected    | 216.3 Detected   | Hist2h2bb     | 2.494809689 | 0.98961938 | 1.58114035 | 0.627193  |
| A_55_P2405 | 225.7 Detected   | 431.4 Detected   | 245.3 Detected   | 562.5 Detected   | BC023202      | 2.492246345 | 1.08684094 | 1.3038943  | 0.5686138 |
| A_55_P2149 | 151.8 Detected   | 453.2 Detected   | 531.3 Detected   | 378.3 Detected   | Sdr39u1       | 2.492094862 | 3.5        | 0.8347308  | 1.1723301 |
| A_55_P2184 | 330.3 Detected   | 580.5 Detected   | 547.2 Detected   | 822.9 Detected   | Eif2s1        | 2.491371148 | 1.65667575 | 1.41757106 | 0.9426357 |
| A_66_P1147 | 19.8 Detected    | 49.5 Detected    | 30.1 Detected    | 49.3 Not Detect  | Pdp2          | 2.48989899  | 1.52020202 | 0.9959596  | 0.6080808 |
| A_51_P3151 | 16.6 Detected    | 24.2 Detected    | 28.9 Detected    | 41.3 Not Detect  | Letm1         | 2.487951807 | 1.74096386 | 1.70661157 | 1.1942149 |
| A_51_P1551 | 22721.3 Detected | 20282.5 Detected | 20267.3 Detected | 56513.4 Detected | Ank           | 2.487243248 | 0.89199562 | 2.78631332 | 0.9992506 |
| A_52_P6551 | 319.4 Detected   | 329.6 Detected   | 1013.1 Detected  | 794.4 Detected   | Nlrc4         | 2.487163431 | 3.17188478 | 2.41019417 | 3.0737257 |
| A_55_P2017 | 3.7 Not Detect   | 3.4 Not Detect   | 115.8 Detected   | 9.2 Not Detect   | Fank1         | 2.486486486 | 31.2972973 | 2.70588235 | 34.058824 |
| A_66_P1328 | 140.1 Detected   | 210 Detected     | 222.3 Detected   | 348 Detected     | B930049P21Rik | 2.483940043 | 1.58672377 | 1.65714286 | 1.0585714 |
| A_51_P4879 | 48.8 Detected    | 118.9 Detected   | 113.6 Detected   | 121.2 Detected   | Rin1          | 2.483606557 | 2.32786885 | 1.01934399 | 0.9554247 |
| A_51_P1333 | 1654.3 Detected  | 2806 Detected    | 3041.6 Detected  | 4105.4 Detected  | Scly          | 2.481653872 | 1.83860243 | 1.46307912 | 1.0839629 |
| A_55_P2005 | 17772.3 Detected | 21633.6 Detected | 38290.5 Detected | 44087.5 Detected | Pepd          | 2.480686236 | 2.15450448 | 2.03791787 | 1.7699551 |
| A_55_P2162 | 124.9 Detected   | 170.5 Detected   | 178.6 Detected   | 309.8 Detected   | Txndc9        | 2.480384307 | 1.42994396 | 1.8170088  | 1.0475073 |
| A_51_P3996 | 371.2 Detected   | 491 Detected     | 545.7 Detected   | 920.7 Detected   | Zkscan14      | 2.480334052 | 1.47009698 | 1.87515275 | 1.1114053 |
| A_55_P2313 | 20 Detected      | 24.1 Detected    | 38.1 Detected    | 49.6 Not Detect  | 4930509E22Rik | 2.48        | 1.905      | 2.05809129 | 1.5809129 |
| A_55_P1998 | 12.5 Not Detect  | 17.6 Detected    | 23.7 Detected    | 31 Not Detect    | 9130015A21Rik | 2.48        | 1.896      | 1.76136364 | 1.3465909 |
| A_55_P2100 | 48.2 Detected    | 31.2 Detected    | 69.6 Detected    | 119.5 Detected   | Mapt          | 2.479253112 | 1.4439834  | 3.83012821 | 2.2307692 |
| A_55_P1977 | 29749.8 Detected | 25359.3 Detected | 84329 Detected   | 73739.5 Detected | Eno3          | 2.478655319 | 2.83460729 | 2.90778925 | 3.3253678 |
| A_51_P3144 | 58.3 Detected    | 100.8 Detected   | 52.3 Detected    | 144.5 Detected   | Polr3h        | 2.478559177 | 0.89708405 | 1.43353175 | 0.5188492 |
| A_51_P5072 | 10872.2 Detected | 12224.2 Detected | 15402.9 Detected | 26942.1 Detected | Klf5          | 2.478072515 | 1.41672339 | 2.20399699 | 1.2600334 |
| A_55_P1964 | 24.9 Detected    | 28.7 Detected    | 22 Detected      | 61.7 Detected    | 4932411N23Rik | 2.477911647 | 0.88353414 | 2.14982578 | 0.7665505 |
| A_55_P1999 | 1912.7 Detected  | 2935.1 Detected  | 3257.5 Detected  | 4738.5 Detected  | Nudt6         | 2.477387986 | 1.70308987 | 1.6144254  | 1.1098429 |
| A_55_P2099 | 1120.6 Detected  | 1245.1 Detected  | 2321 Detected    | 2776 Detected    | H2afj         | 2.477244333 | 2.07121185 | 2.2295398  | 1.8641073 |
| A_55_P1985 | 4.2 Not Detect   | 24 Detected      | 9.1 Not Detect   | 10.4 Not Detect  | Speer1-ps1    | 2.476190476 | 2.16666667 | 0.43333333 | 0.3791667 |
| A_55_P2153 | 270.6 Detected   | 551.7 Detected   | 331.8 Detected   | 669.7 Detected   | Zfp655        | 2.474870658 | 1.22616408 | 1.21388436 | 0.6014138 |
| A_51_P3462 | 157 Detected     | 108.2 Detected   | 118.7 Detected   | 388.5 Detected   | Arhgap33      | 2.474522293 | 0.75605096 | 3.59057301 | 1.0970425 |
| A_55_P1968 | 3.8 Not Detect   | 18.8 Detected    | 3.4 Not Detect   | 9.4 Not Detect   | Gprc5c        | 2.473684211 | 0.89473684 | 0.5        | 0.1808511 |
| A_55_P2115 | 186.2 Detected   | 161.8 Detected   | 209.9 Detected   | 460.4 Detected   | Kif1c         | 2.472610097 | 1.12728249 | 2.84548826 | 1.2972806 |
| A_51_P5197 | 9895.3 Detected  | 12819.8 Detected | 17062.6 Detected | 24461 Detected   | Rusc1         | 2.471981648 | 1.72431356 | 1.90806409 | 1.3309568 |

|            |                  |                  |                  |                  |               |             |            |            |           |
|------------|------------------|------------------|------------------|------------------|---------------|-------------|------------|------------|-----------|
| A_55_P2146 | 97.7 Detected    | 140.1 Detected   | 179.7 Detected   | 241.5 Detected   | 1810011O10Rik | 2.47185261  | 1.83930399 | 1.72376874 | 1.2826552 |
| A_51_P5055 | 5714.7 Detected  | 13099.2 Detected | 7087 Detected    | 14121.8 Detected | Hist1h4i      | 2.471135843 | 1.24013509 | 1.07806584 | 0.5410254 |
| A_51_P4090 | 15.3 Detected    | 36.1 Detected    | 51.8 Detected    | 37.8 Not Detect  | Comp          | 2.470588235 | 3.38562092 | 1.04709141 | 1.434903  |
| A_55_P2000 | 839.5 Detected   | 2512 Detected    | 3191.5 Detected  | 2071.4 Detected  | Sdr39u1       | 2.467421084 | 3.80166766 | 0.82460191 | 1.2705016 |
| A_55_P2017 | 289.8 Detected   | 616.2 Detected   | 388.8 Detected   | 715 Detected     | Dand5         | 2.467218772 | 1.34161491 | 1.16033755 | 0.630964  |
| A_55_P2128 | 7477.3 Detected  | 9322.3 Detected  | 11108.4 Detected | 18442.3 Detected | Pbxip1        | 2.46643842  | 1.48561647 | 1.97829935 | 1.1915943 |
| A_55_P2138 | 903 Detected     | 917.2 Detected   | 1822.5 Detected  | 2226.7 Detected  | Tpk1          | 2.465891473 | 2.01827243 | 2.42771478 | 1.9870257 |
| A_65_P1354 | 41.1 Detected    | 104.3 Detected   | 57.6 Detected    | 101.3 Detected   | Ints10        | 2.464720195 | 1.40145985 | 0.97123682 | 0.5522531 |
| A_55_P2017 | 4403.2 Detected  | 8311.8 Detected  | 5801.1 Detected  | 10850.7 Detected | Fuk           | 2.464275981 | 1.31747366 | 1.3054573  | 0.6979355 |
| A_55_P2008 | 1968.2 Detected  | 2841.3 Detected  | 3684 Detected    | 4849.2 Detected  | Pcx           | 2.463774007 | 1.871761   | 1.70668356 | 1.2965896 |
| A_51_P3979 | 20.5 Detected    | 21.7 Detected    | 11.3 Not Detect  | 50.5 Detected    | Grin3b        | 2.463414634 | 0.55121951 | 2.32718894 | 0.5207373 |
| A_55_P2042 | 75.1 Detected    | 76.3 Detected    | 48.2 Detected    | 185 Detected     | Krtap26-1     | 2.463382157 | 0.64181092 | 2.42463958 | 0.6317169 |
| A_51_P1692 | 24.1 Detected    | 18.6 Detected    | 23 Detected      | 59.3 Detected    | Olf190        | 2.460580913 | 0.95435685 | 3.18817204 | 1.2365591 |
| A_52_P1683 | 109.7 Detected   | 141.1 Detected   | 249.3 Detected   | 269.9 Detected   | Mia2          | 2.460346399 | 2.27256153 | 1.91282778 | 1.766832  |
| A_51_P3638 | 18.5 Detected    | 12.6 Not Detect  | 16.8 Detected    | 45.5 Detected    |               | 2.459459459 | 0.90810811 | 3.61111111 | 1.3333333 |
| A_55_P2031 | 18.5 Detected    | 26.3 Detected    | 29.2 Detected    | 45.5 Not Detect  | Gm3032        | 2.459459459 | 1.57837838 | 1.73003802 | 1.1102662 |
| A_55_P2051 | 419 Detected     | 701.8 Detected   | 342.6 Detected   | 1030.5 Detected  | Tet2          | 2.459427208 | 0.8176611  | 1.46836706 | 0.4881733 |
| A_55_P1960 | 1879.9 Detected  | 1012.2 Detected  | 1934.7 Detected  | 4622.1 Detected  | Egln3         | 2.458694611 | 1.02915049 | 4.56639004 | 1.9113811 |
| A_52_P3870 | 4369.7 Detected  | 2230.4 Detected  | 4067.8 Detected  | 10743.7 Detected | Egln3         | 2.458681374 | 0.93091059 | 4.81693867 | 1.8237984 |
| A_52_P3737 | 492.8 Detected   | 674.3 Detected   | 702.3 Detected   | 1211.5 Detected  | Zdhc3         | 2.458400974 | 1.42512175 | 1.79667804 | 1.0415245 |
| A_51_P3136 | 291.1 Detected   | 237.8 Detected   | 599.7 Detected   | 715.4 Detected   | Slc26a6       | 2.457574717 | 2.0601168  | 3.00841043 | 2.5218671 |
| A_52_P4946 | 530.6 Detected   | 833 Detected     | 871.2 Detected   | 1303.5 Detected  | Nr4a2         | 2.456652846 | 1.64191481 | 1.56482593 | 1.0458583 |
| A_55_P2228 | 30.2 Detected    | 150.8 Detected   | 22.1 Detected    | 74.1 Detected    | BC024137      | 2.453642384 | 0.73178808 | 0.49137931 | 0.1465517 |
| A_51_P2208 | 92 Detected      | 176 Detected     | 114.4 Detected   | 225.7 Detected   | Gdf9          | 2.45326087  | 1.24347826 | 1.28238636 | 0.65      |
| A_55_P2230 | 14.6 Not Detect  | 35.1 Detected    | 34.7 Detected    | 35.8 Not Detect  | 5033403F01Rik | 2.452054795 | 2.37671233 | 1.01994302 | 0.988604  |
| A_55_P1970 | 57.7 Detected    | 403.6 Detected   | 3.8 Not Detect   | 141.4 Detected   | Hdac9         | 2.450606586 | 0.06585789 | 0.35034688 | 0.0094153 |
| A_55_P2096 | 3128.1 Detected  | 4300.1 Detected  | 6874.1 Detected  | 7661.1 Detected  | Elmod3        | 2.449122471 | 2.19753205 | 1.78160973 | 1.5985907 |
| A_55_P1981 | 91.2 Detected    | 108.3 Detected   | 156.8 Detected   | 223.3 Detected   | 5430410E06Rik | 2.448464912 | 1.71929825 | 2.06186519 | 1.4478301 |
| A_55_P1993 | 88.2 Detected    | 65.1 Detected    | 51 Detected      | 215.8 Detected   | Speer4c       | 2.446712018 | 0.57823129 | 3.31490015 | 0.7834101 |
| A_55_P2120 | 4762.1 Detected  | 3518.2 Detected  | 6800.6 Detected  | 11648.2 Detected | Ssh3          | 2.446021713 | 1.42806745 | 3.31084077 | 1.9329771 |
| A_51_P4085 | 188 Detected     | 314.3 Detected   | 394.3 Detected   | 459.8 Detected   | Enpp1         | 2.445744681 | 2.09734043 | 1.4629335  | 1.2545339 |
| A_51_P5005 | 1622.1 Detected  | 2151.4 Detected  | 1844.6 Detected  | 3966.8 Detected  | Mfsd1         | 2.445471919 | 1.13716787 | 1.84382263 | 0.8573952 |
| A_55_P2157 | 19.1 Detected    | 29.2 Detected    | 21.1 Detected    | 46.7 Detected    | Rspry1        | 2.445026178 | 1.10471204 | 1.59931507 | 0.7226027 |
| A_55_P2094 | 20.5 Detected    | 23.3 Detected    | 33 Detected      | 50.1 Not Detect  | Dnase113      | 2.443902439 | 1.6097561  | 2.15021459 | 1.416309  |
| A_52_P5047 | 231.6 Detected   | 551.5 Detected   | 286 Detected     | 565.8 Detected   | Epha7         | 2.443005181 | 1.23488774 | 1.02592928 | 0.5185857 |
| A_55_P1952 | 8455.7 Detected  | 10401.4 Detected | 16312.7 Detected | 20655.9 Detected | Pnp0          | 2.442837376 | 1.92919569 | 1.9858769  | 1.5683177 |
| A_55_P1952 | 376.8 Detected   | 831.9 Detected   | 222.4 Detected   | 920.4 Detected   | Arid3a        | 2.442675159 | 0.59023355 | 1.10638298 | 0.2673398 |
| A_55_P2109 | 23380.2 Detected | 41772 Detected   | 45908.9 Detected | 57087.1 Detected | Hist1h2bc     | 2.4416857   | 1.96358029 | 1.36663555 | 1.0990352 |
| A_55_P2166 | 119.1 Detected   | 23.5 Detected    | 20.1 Detected    | 290.8 Detected   | Flt1          | 2.441645676 | 0.16876574 | 12.3744681 | 0.8553191 |
| A_55_P2054 | 28.6 Detected    | 57.6 Detected    | 25.8 Detected    | 69.8 Detected    | Gm12359       | 2.440559441 | 0.9020979  | 1.21180556 | 0.4479167 |

|            |        |            |        |            |        |            |         |            |               |             |            |            |           |
|------------|--------|------------|--------|------------|--------|------------|---------|------------|---------------|-------------|------------|------------|-----------|
| A_55_P2007 | 2966.6 | Detected   | 3013   | Detected   | 5225.8 | Detected   | 7238.3  | Detected   | Alkbh8        | 2.439931234 | 1.7615452  | 2.40235646 | 1.7344175 |
| A_55_P2031 | 4738.8 | Detected   | 8746   | Detected   | 6379.5 | Detected   | 11559.2 | Detected   | Fuk           | 2.439267325 | 1.34622689 | 1.32165561 | 0.7294192 |
| A_51_P1402 | 4.1    | Not Detect | 14.1   | Not Detect | 19.4   | Detected   | 10      | Not Detect | 1700029H14Rik | 2.43902439  | 4.73170732 | 0.70921986 | 1.3758865 |
| A_51_P3550 | 417.2  | Detected   | 414.6  | Detected   | 571.4  | Detected   | 1017.3  | Detected   | Nsun3         | 2.438398849 | 1.3696069  | 2.4536903  | 1.3781959 |
| A_52_P3012 | 1022.9 | Detected   | 976.8  | Detected   | 1403.8 | Detected   | 2493.7  | Detected   | Brwd1         | 2.437872715 | 1.37237267 | 2.55292793 | 1.4371417 |
| A_51_P2857 | 19.2   | Detected   | 14.7   | Detected   | 9.5    | Not Detect | 46.8    | Detected   | Asphd2        | 2.4375      | 0.49479167 | 3.18367347 | 0.6462585 |
| A_55_P2161 | 299.3  | Detected   | 316.6  | Detected   | 423.2  | Detected   | 729.4   | Detected   | Gm10516       | 2.437019713 | 1.41396592 | 2.30385344 | 1.3367025 |
| A_52_P1173 | 387.3  | Detected   | 623.6  | Detected   | 707.4  | Detected   | 943.2   | Detected   | Tlr6          | 2.435321456 | 1.82649109 | 1.51250802 | 1.134381  |
| A_55_P2092 | 812.5  | Detected   | 1420.7 | Detected   | 757.2  | Detected   | 1978    | Detected   | Ctbs          | 2.434461538 | 0.93193846 | 1.39227142 | 0.5329767 |
| A_51_P1003 | 98.6   | Detected   | 207.5  | Detected   | 74.5   | Detected   | 239.9   | Detected   | Tap1          | 2.43306288  | 0.75557809 | 1.15614458 | 0.3590361 |
| A_55_P2046 | 7693.7 | Detected   | 8800   | Detected   | 5633.2 | Detected   | 18715.4 | Detected   | Foxq1         | 2.432561706 | 0.73218347 | 2.12675    | 0.6401364 |
| A_51_P1499 | 67.4   | Detected   | 107.8  | Detected   | 75.1   | Detected   | 163.9   | Detected   | Letm2         | 2.431750742 | 1.11424332 | 1.52040816 | 0.6966605 |
| A_51_P4160 | 515.2  | Detected   | 672.7  | Detected   | 483.9  | Detected   | 1252.8  | Detected   | Dirc2         | 2.431677019 | 0.93924689 | 1.86234577 | 0.71934   |
| A_51_P4501 | 6.5    | Not Detect | 6.5    | Not Detect | 22.1   | Detected   | 15.8    | Not Detect | Dnajb13       | 2.430769231 | 3.4        | 2.43076923 | 3.4       |
| A_51_P2130 | 733    | Detected   | 883.9  | Detected   | 1602   | Detected   | 1781.2  | Detected   | Macrod1       | 2.430013643 | 2.18553888 | 2.01516009 | 1.8124222 |
| A_55_P2025 | 900.3  | Detected   | 640.7  | Detected   | 1491.7 | Detected   | 2186.9  | Detected   | Mxd1          | 2.429079196 | 1.65689215 | 3.41329796 | 2.3282347 |
| A_55_P2170 | 13.3   | Not Detect | 15.9   | Detected   | 15.2   | Not Detect | 32.3    | Not Detect | Catsperd      | 2.428571429 | 1.14285714 | 2.03144654 | 0.9559748 |
| A_66_P1017 | 41.8   | Detected   | 75.9   | Detected   | 76.9   | Detected   | 101.5   | Detected   | Adam4         | 2.428229665 | 1.83971292 | 1.3372859  | 1.0131752 |
| A_55_P2085 | 1629.6 | Detected   | 2032.3 | Detected   | 4511.7 | Detected   | 3956.5  | Detected   | Ifi27I2b      | 2.427896416 | 2.76859352 | 1.94680903 | 2.219997  |
| A_55_P2036 | 15.2   | Detected   | 18.1   | Detected   | 17.9   | Detected   | 36.9    | Not Detect | Ifna11        | 2.427631579 | 1.17763158 | 2.03867403 | 0.9889503 |
| A_66_P1188 | 372.4  | Detected   | 949.7  | Detected   | 321.7  | Detected   | 903.6   | Detected   | 2310034G01Rik | 2.426423201 | 0.86385607 | 0.95145836 | 0.3387385 |
| A_55_P2118 | 10.1   | Not Detect | 24.5   | Detected   | 15.8   | Not Detect | 24.5    | Not Detect | Zfp882        | 2.425742574 | 1.56435644 | 1          | 0.644898  |
| A_55_P2123 | 75.4   | Detected   | 173.7  | Detected   | 64.1   | Detected   | 182.8   | Detected   | 2310034G01Rik | 2.424403183 | 0.85013263 | 1.05238918 | 0.3690271 |
| A_55_P2074 | 50.5   | Detected   | 78.6   | Detected   | 91.5   | Detected   | 122.3   | Detected   | Ephx4         | 2.421782178 | 1.81188119 | 1.55597964 | 1.1641221 |
| A_55_P2009 | 5929.2 | Detected   | 7455.5 | Detected   | 7923.9 | Detected   | 14358.2 | Detected   | Rnu3b1        | 2.421608311 | 1.33641975 | 1.9258534  | 1.0628261 |
| A_55_P1981 | 68.2   | Detected   | 106.6  | Detected   | 74.2   | Detected   | 165.1   | Detected   | Grhl2         | 2.420821114 | 1.08797654 | 1.54878049 | 0.69606   |
| A_55_P2047 | 2996.5 | Detected   | 3977.1 | Detected   | 6308.5 | Detected   | 7252    | Detected   | Elmod3        | 2.42015685  | 2.1052895  | 1.82343919 | 1.586206  |
| A_55_P2057 | 29.1   | Detected   | 22.9   | Detected   | 24.4   | Detected   | 70.4    | Detected   | Pou2f2        | 2.419243986 | 0.83848797 | 3.07423581 | 1.0655022 |
| A_52_P4097 | 431.3  | Detected   | 885.4  | Detected   | 2214.1 | Detected   | 1043.1  | Detected   | Scamp5        | 2.418502203 | 5.13354973 | 1.17811159 | 2.5006777 |
| A_66_P1101 | 20.8   | Detected   | 19.6   | Detected   | 13.8   | Not Detect | 50.3    | Detected   | 5330434G04Rik | 2.418269231 | 0.66346154 | 2.56632653 | 0.7040816 |
| A_51_P4281 | 23.8   | Detected   | 308    | Detected   | 5.7    | Not Detect | 57.5    | Detected   | Lrig3         | 2.415966387 | 0.2394958  | 0.18668831 | 0.0185065 |
| A_51_P1795 | 4.1    | Not Detect | 25.4   | Detected   | 3.6    | Not Detect | 9.9     | Not Detect | Gbx2          | 2.414634146 | 0.87804878 | 0.38976378 | 0.1417323 |
| A_55_P1960 | 300.2  | Detected   | 274    | Detected   | 349.8  | Detected   | 724.6   | Detected   | Tmem80        | 2.413724184 | 1.16522318 | 2.64452555 | 1.2766423 |
| A_52_P5546 | 22     | Detected   | 30.1   | Detected   | 28.3   | Detected   | 53.1    | Detected   | Gm9725        | 2.413636364 | 1.28636364 | 1.7641196  | 0.9401993 |
| A_55_P2058 | 2446.4 | Detected   | 3607.8 | Detected   | 2094   | Detected   | 5902.4  | Detected   | Pde4dip       | 2.412688031 | 0.8559516  | 1.63601087 | 0.5804091 |
| A_51_P4914 | 366.7  | Detected   | 185.6  | Detected   | 402.3  | Detected   | 884     | Detected   | Cst13         | 2.410689937 | 1.09708208 | 4.76293103 | 2.1675647 |
| A_52_P2729 | 30.2   | Detected   | 53.6   | Detected   | 48.7   | Detected   | 72.8    | Detected   | Fbxl12os      | 2.410596026 | 1.61258278 | 1.35820896 | 0.9085821 |
| A_66_P1110 | 91.1   | Detected   | 93.2   | Detected   | 128    | Detected   | 219.6   | Detected   | Prlh          | 2.41053787  | 1.4050494  | 2.35622318 | 1.3733906 |
| A_52_P2138 | 9.5    | Not Detect | 5.1    | Not Detect | 116.5  | Detected   | 22.9    | Not Detect | Tmc7          | 2.410526316 | 12.2631579 | 4.49019608 | 22.843137 |
| A_55_P1965 | 71.2   | Detected   | 98.9   | Detected   | 155.4  | Detected   | 171.6   | Detected   | Fbxl3         | 2.41011236  | 2.18258427 | 1.73508595 | 1.5712841 |

|            |         |            |         |            |         |            |         |            |               |             |            |            |           |
|------------|---------|------------|---------|------------|---------|------------|---------|------------|---------------|-------------|------------|------------|-----------|
| A_55_P2050 | 1272.8  | Detected   | 1359    | Detected   | 1216.5  | Detected   | 3067    | Detected   | Prmp5         | 2.40964802  | 0.95576681 | 2.25680648 | 0.8951435 |
| A_55_P1961 | 219     | Detected   | 469.9   | Detected   | 312.2   | Detected   | 527.5   | Detected   | Vps53         | 2.408675799 | 1.42557078 | 1.12257927 | 0.6643967 |
| A_55_P2142 | 1912.3  | Detected   | 3660.1  | Detected   | 2443    | Detected   | 4604.6  | Detected   | Gm13770       | 2.407885792 | 1.27751922 | 1.25805306 | 0.6674681 |
| A_51_P4388 | 3671.7  | Detected   | 3253.1  | Detected   | 5361.2  | Detected   | 8841    | Detected   | Txnip         | 2.40787646  | 1.46014108 | 2.71771541 | 1.648028  |
| A_55_P2051 | 5325.6  | Detected   | 4354.1  | Detected   | 10765.1 | Detected   | 12817.4 | Detected   | Sult2b1       | 2.406752291 | 2.02138726 | 2.94375416 | 2.4724053 |
| A_52_P1095 | 3.7     | Not Detect | 21.7    | Detected   | 3.2     | Not Detect | 8.9     | Not Detect | Map7          | 2.405405405 | 0.86486486 | 0.41013825 | 0.1474654 |
| A_51_P1595 | 2336.6  | Detected   | 2991.6  | Detected   | 2583.9  | Detected   | 5619.8  | Detected   | Rnf213        | 2.405118548 | 1.10583754 | 1.87852654 | 0.8637184 |
| A_55_P2145 | 302.1   | Detected   | 324.6   | Detected   | 268.3   | Detected   | 726.5   | Detected   | Flt3l         | 2.404832837 | 0.88811652 | 2.23813925 | 0.8265558 |
| A_52_P661  | 291.3   | Detected   | 312.4   | Detected   | 34.6    | Detected   | 700.4   | Detected   | Plxna4        | 2.404394095 | 0.11877789 | 2.24199744 | 0.1107554 |
| A_51_P3377 | 68.6    | Detected   | 146.2   | Detected   | 134.1   | Detected   | 164.9   | Detected   | Ovgp1         | 2.403790087 | 1.9548105  | 1.12790698 | 0.9172367 |
| A_52_P6744 | 53      | Detected   | 67.3    | Detected   | 60.4    | Detected   | 127.4   | Detected   | Arih1         | 2.403773585 | 1.13962264 | 1.89301634 | 0.897474  |
| A_66_P1287 | 40.6    | Detected   | 72.3    | Detected   | 50.1    | Detected   | 97.5    | Detected   | BC106175      | 2.401477833 | 1.23399015 | 1.34854772 | 0.6929461 |
| A_55_P2006 | 12      | Not Detect | 20.8    | Detected   | 12.9    | Not Detect | 28.8    | Not Detect | Pcdhac1       | 2.4         | 1.075      | 1.38461538 | 0.6201923 |
| A_55_P2049 | 14459.5 | Detected   | 13881.4 | Detected   | 25890.9 | Detected   | 34699.3 | Detected   | Slc9a1        | 2.399757945 | 1.79058059 | 2.49969744 | 1.8651505 |
| A_52_P2376 | 271.8   | Detected   | 355.7   | Detected   | 380.5   | Detected   | 651.8   | Detected   | 2610035D17Rik | 2.398086829 | 1.39992642 | 1.83244307 | 1.0697217 |
| A_51_P2707 | 1693.7  | Detected   | 6805.2  | Detected   | 4049.8  | Detected   | 4061.6  | Detected   | Syngn1        | 2.398063411 | 2.39109642 | 0.59683771 | 0.5951037 |
| A_51_P3194 | 2225.3  | Detected   | 2626.9  | Detected   | 3130.5  | Detected   | 5334.5  | Detected   | Acat1         | 2.397204871 | 1.40677661 | 2.03072062 | 1.1917089 |
| A_55_P2093 | 3.8     | Not Detect | 5.8     | Not Detect | 191     | Detected   | 9.1     | Not Detect | LOC100862557  | 2.394736842 | 50.2631579 | 1.56896552 | 32.931034 |
| A_55_P2033 | 144.5   | Detected   | 286.9   | Detected   | 132     | Detected   | 345.9   | Detected   | Cdcp1         | 2.393771626 | 0.91349481 | 1.20564657 | 0.4600906 |
| A_51_P2621 | 1084    | Detected   | 1766.2  | Detected   | 1635.2  | Detected   | 2593.9  | Detected   | Ddx19b        | 2.392896679 | 1.50848708 | 1.46863322 | 0.9258295 |
| A_55_P1954 | 152.1   | Detected   | 330.6   | Detected   | 254.9   | Detected   | 363.9   | Detected   | Mapt          | 2.392504931 | 1.67587114 | 1.10072595 | 0.7710224 |
| A_52_P4133 | 15.3    | Detected   | 24.6    | Detected   | 23.9    | Detected   | 36.6    | Not Detect | Ppef2         | 2.392156863 | 1.5620915  | 1.48780488 | 0.9715447 |
| A_55_P1990 | 22.2    | Detected   | 36.5    | Detected   | 40.4    | Detected   | 53.1    | Detected   | Gm5820        | 2.391891892 | 1.81981982 | 1.45479452 | 1.1068493 |
| A_55_P2093 | 8406.7  | Detected   | 10689   | Detected   | 12649.2 | Detected   | 20104.8 | Detected   | Pbxip1        | 2.391521049 | 1.504657   | 1.88088689 | 1.1833848 |
| A_66_P1211 | 4.1     | Not Detect | 3.5     | Not Detect | 31.8    | Detected   | 9.8     | Not Detect | Serpina1d     | 2.390243902 | 7.75609756 | 2.8        | 9.0857143 |
| A_51_P1368 | 1506.6  | Detected   | 1866    | Detected   | 2409.7  | Detected   | 3599.9  | Detected   | Rb1           | 2.389419886 | 1.59942918 | 1.92920686 | 1.2913719 |
| A_52_P1013 | 97.2    | Detected   | 483     | Detected   | 754     | Detected   | 232.2   | Detected   | Tmem130       | 2.388888889 | 7.75720165 | 0.48074534 | 1.5610766 |
| A_51_P4634 | 67.9    | Detected   | 175.6   | Detected   | 102     | Detected   | 162     | Detected   | Pik3ip1       | 2.385861561 | 1.50220913 | 0.92255125 | 0.5808656 |
| A_55_P1960 | 475.9   | Detected   | 765.9   | Detected   | 1026.6  | Detected   | 1135.4  | Detected   | Sorbs2        | 2.385795335 | 2.15717588 | 1.48243896 | 1.3403839 |
| A_51_P1848 | 921.1   | Detected   | 1223.8  | Detected   | 967.6   | Detected   | 2197.4  | Detected   | Elmod2        | 2.385625882 | 1.05048312 | 1.79555483 | 0.7906521 |
| A_55_P2164 | 3.9     | Not Detect | 8.5     | Not Detect | 73.6    | Detected   | 9.3     | Not Detect | Tlx2          | 2.384615385 | 18.8717949 | 1.09411765 | 8.6588235 |
| A_51_P3031 | 4224.6  | Detected   | 4373.7  | Detected   | 4796.6  | Detected   | 10070.4 | Detected   | Fam114a1      | 2.383752308 | 1.13539743 | 2.30248988 | 1.0966916 |
| A_51_P4780 | 1201.3  | Detected   | 1613.6  | Detected   | 3358.6  | Detected   | 2862.6  | Detected   | Papolg        | 2.382918505 | 2.79580455 | 1.77404561 | 2.0814328 |
| A_55_P2051 | 20.4    | Detected   | 35.7    | Detected   | 242.6   | Detected   | 48.6    | Detected   | Rorc          | 2.382352941 | 11.8921569 | 1.36134454 | 6.7955182 |
| A_55_P2047 | 255.4   | Detected   | 265.7   | Detected   | 190.2   | Detected   | 608.4   | Detected   | Ceacam20      | 2.382145654 | 0.74471417 | 2.28980053 | 0.7158449 |
| A_65_P0614 | 68.6    | Detected   | 64.5    | Detected   | 209.7   | Detected   | 163.4   | Detected   | Fgfr3         | 2.381924198 | 3.05685131 | 2.53333333 | 3.2511628 |
| A_51_P3559 | 2950.4  | Detected   | 3507.7  | Detected   | 3999.7  | Detected   | 7023.4  | Detected   | Mvd           | 2.380490781 | 1.35564669 | 2.0022807  | 1.1402629 |
| A_55_P2311 | 270.1   | Detected   | 346.8   | Detected   | 206.5   | Detected   | 642.9   | Detected   | C130045F17Rik | 2.380229545 | 0.76453165 | 1.85380623 | 0.5954441 |
| A_66_P1265 | 853.3   | Detected   | 1329.2  | Detected   | 1657.4  | Detected   | 2029.8  | Detected   | Ptges3l       | 2.378764795 | 1.9423415  | 1.52708396 | 1.2469154 |
| A_55_P2037 | 38.9    | Detected   | 47.9    | Detected   | 64.5    | Detected   | 92.5    | Detected   | Rph3al        | 2.377892031 | 1.65809769 | 1.93110647 | 1.3465553 |

|            |                  |                  |                  |                  |               |             |            |            |           |
|------------|------------------|------------------|------------------|------------------|---------------|-------------|------------|------------|-----------|
| A_52_P5482 | 6.9 Not Detect   | 10.8 Not Detect  | 99.5 Detected    | 16.4 Not Detect  | Gm10030       | 2.376811594 | 14.4202899 | 1.51851852 | 9.212963  |
| A_51_P2364 | 655.7 Detected   | 738.7 Detected   | 988.9 Detected   | 1558.3 Detected  | Cdkl2         | 2.376544151 | 1.50815922 | 2.10951672 | 1.3387031 |
| A_55_P2179 | 2822.5 Detected  | 5509.5 Detected  | 3806 Detected    | 6707.1 Detected  | Gatad2a       | 2.376297609 | 1.34844996 | 1.21737    | 0.6908068 |
| A_51_P4128 | 18.1 Detected    | 18.5 Detected    | 49.5 Detected    | 43 Not Detect    | Dqx1          | 2.375690608 | 2.73480663 | 2.32432432 | 2.6756757 |
| A_55_P2057 | 18.9 Detected    | 37 Detected      | 9.2 Not Detect   | 44.9 Not Detect  | Ocel1         | 2.375661376 | 0.48677249 | 1.21351351 | 0.2486486 |
| A_55_P1989 | 12733.2 Detected | 14173.7 Detected | 16001.2 Detected | 30248 Detected   | Sat1          | 2.375522257 | 1.2566519  | 2.13409343 | 1.128936  |
| A_55_P2093 | 9.6 Not Detect   | 53.4 Detected    | 20.2 Detected    | 22.8 Not Detect  | Casd1         | 2.375       | 2.10416667 | 0.42696629 | 0.3782772 |
| A_55_P2074 | 3833.9 Detected  | 6415.2 Detected  | 4746.5 Detected  | 9102.9 Detected  | Ppp1r13l      | 2.374318579 | 1.23803438 | 1.4189581  | 0.7398834 |
| A_52_P5895 | 8899.7 Detected  | 7267.9 Detected  | 17823.3 Detected | 21122.9 Detected | Foxo6         | 2.373439554 | 2.00268548 | 2.90632783 | 2.4523315 |
| A_51_P2584 | 19.6 Detected    | 19.4 Detected    | 29.8 Detected    | 46.5 Detected    | Per3          | 2.37244898  | 1.52040816 | 2.39690722 | 1.5360825 |
| A_55_P2090 | 6642.3 Detected  | 3715.7 Detected  | 11980.8 Detected | 15754.1 Detected | Fam211a       | 2.37178387  | 1.80371257 | 4.23987405 | 3.2243723 |
| A_66_P1112 | 1296.9 Detected  | 2132.3 Detected  | 1537.9 Detected  | 3074.1 Detected  | Pdp2          | 2.370344668 | 1.18582774 | 1.44168269 | 0.72124   |
| A_55_P2143 | 1228.7 Detected  | 1471.6 Detected  | 1800.9 Detected  | 2911.9 Detected  | Pbxip1        | 2.36990315  | 1.46569545 | 1.97873063 | 1.22377   |
| A_55_P2104 | 37.9 Detected    | 23.6 Detected    | 74 Detected      | 89.8 Detected    | Gm5767        | 2.36939314  | 1.9525066  | 3.80508475 | 3.1355932 |
| A_55_P2024 | 14.4 Not Detect  | 36.4 Detected    | 22.8 Detected    | 34.1 Not Detect  | Gaa           | 2.368055556 | 1.58333333 | 0.93681319 | 0.6263736 |
| A_55_P2168 | 125.5 Detected   | 95.5 Detected    | 210.5 Detected   | 297.1 Detected   | Slc9a1        | 2.367330677 | 1.67729084 | 3.11099476 | 2.2041885 |
| A_52_P1110 | 2732.6 Detected  | 7718 Detected    | 999.4 Detected   | 6468.3 Detected  | Pcdh17        | 2.367086291 | 0.36573227 | 0.83807981 | 0.1294895 |
| A_51_P2588 | 150.4 Detected   | 144.9 Detected   | 170.4 Detected   | 356 Detected     | Klrg2         | 2.367021277 | 1.13297872 | 2.4568668  | 1.1759834 |
| A_51_P3478 | 19.1 Detected    | 6.5 Not Detect   | 20 Detected      | 45.2 Not Detect  | Irx6          | 2.366492147 | 1.04712042 | 6.95384615 | 3.0769231 |
| A_55_P1984 | 140.5 Detected   | 148.7 Detected   | 149.3 Detected   | 332.3 Detected   | AB041803      | 2.365124555 | 1.06263345 | 2.23470074 | 1.004035  |
| A_51_P1094 | 19.2 Detected    | 44.4 Detected    | 42.2 Detected    | 45.4 Not Detect  | Ltb4r1        | 2.364583333 | 2.19791667 | 1.02252252 | 0.9504505 |
| A_55_P2130 | 11.8 Not Detect  | 31.8 Detected    | 12.4 Not Detect  | 27.9 Not Detect  | Cdh13         | 2.36440678  | 1.05084746 | 0.87735849 | 0.3899371 |
| A_55_P2386 | 20.7 Detected    | 26.3 Detected    | 33.2 Detected    | 48.9 Detected    | D030020J04Rik | 2.362318841 | 1.60386473 | 1.85931559 | 1.2623574 |
| A_52_P4009 | 972.7 Detected   | 636.8 Detected   | 1406.7 Detected  | 2296 Detected    | Arhgap31      | 2.360440012 | 1.44618073 | 3.60552764 | 2.2090138 |
| A_55_P2018 | 15 Detected      | 20.3 Detected    | 14.7 Not Detect  | 35.4 Not Detect  | Emr1          | 2.36        | 0.98       | 1.74384236 | 0.7241379 |
| A_55_P2415 | 11.7 Not Detect  | 32.2 Detected    | 17.6 Not Detect  | 27.6 Not Detect  | 4930518P08Rik | 2.358974359 | 1.5042735  | 0.85714286 | 0.5465839 |
| A_55_P1967 | 3523.2 Detected  | 3663 Detected    | 6318.4 Detected  | 8308 Detected    | Tmem254c      | 2.35808356  | 1.79336966 | 2.26808627 | 1.7249249 |
| A_65_P0504 | 1041.1 Detected  | 1138.2 Detected  | 1605 Detected    | 2455 Detected    | Ston2         | 2.358082797 | 1.54163865 | 2.15691443 | 1.4101212 |
| A_52_P4575 | 31.3 Detected    | 66.4 Detected    | 35.1 Detected    | 73.8 Detected    | Slc4a4        | 2.357827476 | 1.12140575 | 1.11144578 | 0.5286145 |
| A_55_P2126 | 34.7 Detected    | 67.5 Detected    | 29.5 Detected    | 81.8 Detected    | Zfp467        | 2.357348703 | 0.85014409 | 1.21185185 | 0.437037  |
| A_55_P1984 | 2836 Detected    | 3930.2 Detected  | 2066.4 Detected  | 6685 Detected    | Pde4dip       | 2.35719323  | 0.72863188 | 1.70093125 | 0.5257748 |
| A_55_P2199 | 51.6 Detected    | 127.9 Detected   | 131.1 Detected   | 121.6 Detected   | 9330102E08Rik | 2.356589147 | 2.54069767 | 0.95074277 | 1.0250195 |
| A_51_P2372 | 4.5 Not Detect   | 3.4 Not Detect   | 17.9 Detected    | 10.6 Not Detect  | Kcnp2         | 2.355555556 | 3.97777778 | 3.11764706 | 5.2647059 |
| A_51_P1327 | 2069.9 Detected  | 2125.8 Detected  | 3651 Detected    | 4875.1 Detected  | 2310010J17Rik | 2.355234552 | 1.76385333 | 2.29330135 | 1.7174711 |
| A_51_P3443 | 66 Detected      | 199.9 Detected   | 64 Detected      | 155.4 Detected   | Gpr162        | 2.354545455 | 0.96969697 | 0.77738869 | 0.3201601 |
| A_66_P1319 | 8.2 Not Detect   | 13.6 Not Detect  | 17.9 Detected    | 19.3 Not Detect  | Aurkc         | 2.353658537 | 2.18292683 | 1.41911765 | 1.3161765 |
| A_55_P2413 | 74.2 Detected    | 131 Detected     | 89.5 Detected    | 174.6 Detected   | Rab11fip1     | 2.35309973  | 1.20619946 | 1.33282443 | 0.6832061 |
| A_55_P1992 | 5.1 Not Detect   | 57.7 Detected    | 4 Not Detect     | 12 Not Detect    | Adrb3         | 2.352941176 | 0.78431373 | 0.20797227 | 0.0693241 |
| A_52_P1084 | 9.1 Not Detect   | 17.6 Detected    | 22.9 Detected    | 21.4 Not Detect  | Tspear        | 2.351648352 | 2.51648352 | 1.21590909 | 1.3011364 |
| A_52_P2220 | 1126.6 Detected  | 2158.6 Detected  | 398.3 Detected   | 2649 Detected    | 4931428F04Rik | 2.351322563 | 0.35354163 | 1.22718429 | 0.1845177 |

|            |                  |                  |                  |                  |               |             |            |            |           |
|------------|------------------|------------------|------------------|------------------|---------------|-------------|------------|------------|-----------|
| A_55_P2139 | 353 Detected     | 273.1 Detected   | 428.1 Detected   | 829.4 Detected   | Lrrc56        | 2.349575071 | 1.21274788 | 3.03698279 | 1.5675577 |
| A_55_P2161 | 18.4 Detected    | 14.3 Not Detect  | 20 Detected      | 43.2 Not Detect  | Hif3a         | 2.347826087 | 1.08695652 | 3.02097902 | 1.3986014 |
| A_51_P3003 | 27620.6 Detected | 38721.8 Detected | 74320.6 Detected | 64834.2 Detected | Csrp2         | 2.347313237 | 2.69076704 | 1.67435915 | 1.9193478 |
| A_51_P4903 | 6028.9 Detected  | 7451.4 Detected  | 7544.9 Detected  | 14149.2 Detected | Ifi30         | 2.346895785 | 1.25145549 | 1.89886464 | 1.012548  |
| A_55_P2387 | 24.3 Detected    | 27.6 Detected    | 35 Detected      | 57 Detected      | 2900024J01Rik | 2.345679012 | 1.44032922 | 2.06521739 | 1.2681159 |
| A_52_P6717 | 63.8 Detected    | 127.2 Detected   | 151.1 Detected   | 149.5 Detected   | Acad12        | 2.343260188 | 2.36833856 | 1.17531447 | 1.1878931 |
| A_52_P1641 | 105.2 Detected   | 144.4 Detected   | 231.8 Detected   | 246.4 Detected   | Arrdc3        | 2.342205323 | 2.20342205 | 1.70637119 | 1.6052632 |
| A_51_P1759 | 229.3 Detected   | 243.5 Detected   | 265.3 Detected   | 536.8 Detected   | Vps13d        | 2.341037942 | 1.15699956 | 2.20451745 | 1.0895277 |
| A_52_P9342 | 22 Detected      | 42.2 Detected    | 21.4 Detected    | 51.5 Detected    | Cabin1        | 2.340909091 | 0.97272727 | 1.22037915 | 0.507109  |
| A_51_P1227 | 4987.7 Detected  | 3871.2 Detected  | 7378.7 Detected  | 11673.9 Detected | Slc37a3       | 2.340537723 | 1.47937927 | 3.01557657 | 1.9060498 |
| A_55_P2057 | 106.9 Detected   | 79.7 Detected    | 119.2 Detected   | 250.2 Detected   | 1700049G17Rik | 2.340505145 | 1.1150608  | 3.13927227 | 1.4956085 |
| A_66_P1317 | 32.9 Detected    | 43.3 Detected    | 35.1 Detected    | 77 Detected      | Vwa5a         | 2.340425532 | 1.0668693  | 1.77829099 | 0.8106236 |
| A_51_P4668 | 1037.5 Detected  | 973.1 Detected   | 1572.5 Detected  | 2427.6 Detected  | Tyk2          | 2.339855422 | 1.51566265 | 2.49470764 | 1.6159696 |
| A_52_P2143 | 17.7 Detected    | 16.6 Detected    | 33.5 Detected    | 41.4 Not Detect  | Cst11         | 2.338983051 | 1.89265537 | 2.4939759  | 2.0180723 |
| A_66_P1198 | 36 Detected      | 27.5 Detected    | 24.3 Detected    | 84.2 Detected    | Ddx17         | 2.338888889 | 0.675      | 3.06181818 | 0.8836364 |
| A_55_P2081 | 1337.7 Detected  | 2065.9 Detected  | 1076.8 Detected  | 3127 Detected    | Tet2          | 2.337594378 | 0.80496374 | 1.51362602 | 0.5212256 |
| A_51_P2815 | 4086.8 Detected  | 5870.1 Detected  | 5222.3 Detected  | 9552.7 Detected  | Ppapdc1b      | 2.337452285 | 1.27784575 | 1.62734877 | 0.8896441 |
| A_55_P1991 | 17.3 Detected    | 6.3 Not Detect   | 3.6 Not Detect   | 40.4 Not Detect  | Gm10276       | 2.335260116 | 0.20809249 | 6.41269841 | 0.5714286 |
| A_51_P3288 | 197.2 Detected   | 165.5 Detected   | 179.1 Detected   | 460.4 Detected   | Zfp810        | 2.334685598 | 0.90821501 | 2.78187311 | 1.0821752 |
| A_55_P1985 | 179.8 Detected   | 336.7 Detected   | 238.5 Detected   | 419.6 Detected   | Rad23a        | 2.333704116 | 1.32647386 | 1.24621325 | 0.7083457 |
| A_55_P2133 | 24.9 Detected    | 42.3 Detected    | 41.4 Detected    | 58.1 Detected    | Kirrel3       | 2.333333333 | 1.6626506  | 1.37352246 | 0.9787234 |
| A_55_P2050 | 29.4 Detected    | 90.2 Detected    | 15.2 Not Detect  | 68.6 Detected    | Abcc12        | 2.333333333 | 0.5170068  | 0.76053215 | 0.1685144 |
| A_51_P1456 | 1657.3 Detected  | 1763.3 Detected  | 1144 Detected    | 3864.9 Detected  | Svip          | 2.332046099 | 0.69027937 | 2.19185618 | 0.6487835 |
| A_55_P2160 | 147.1 Detected   | 155.7 Detected   | 152.9 Detected   | 343 Detected     | Ccdc28b       | 2.331747111 | 1.03942896 | 2.2029544  | 0.9820167 |
| A_55_P1980 | 3479.8 Detected  | 5603 Detected    | 3032.8 Detected  | 8113.1 Detected  | Zkscan1       | 2.331484568 | 0.87154434 | 1.44799215 | 0.5412815 |
| A_55_P1956 | 326.1 Detected   | 305.8 Detected   | 396 Detected     | 760.2 Detected   | Rab37         | 2.331186753 | 1.21435143 | 2.48593852 | 1.294964  |
| A_55_P2155 | 104.9 Detected   | 124.2 Detected   | 136.1 Detected   | 244.4 Detected   | Ssbp1         | 2.329837941 | 1.29742612 | 1.96779388 | 1.0958132 |
| A_55_P2132 | 169.1 Detected   | 173 Detected     | 187.9 Detected   | 393.9 Detected   | LOC100041708  | 2.329390893 | 1.11117682 | 2.27687861 | 1.0861272 |
| A_51_P1123 | 995.6 Detected   | 1520.2 Detected  | 2007.8 Detected  | 2319 Detected    | 1810011O10Rik | 2.329248694 | 2.01667336 | 1.52545718 | 1.3207473 |
| A_55_P2410 | 84.7 Detected    | 116.3 Detected   | 186.3 Detected   | 197.2 Detected   | C030037D09Rik | 2.328217237 | 2.19952774 | 1.69561479 | 1.6018917 |
| A_55_P2005 | 2617.1 Detected  | 3906.1 Detected  | 4376.3 Detected  | 6092.3 Detected  | Arhgef10l     | 2.327882007 | 1.67219441 | 1.55968869 | 1.1203758 |
| A_55_P2415 | 152.5 Detected   | 248 Detected     | 290.9 Detected   | 355 Detected     | 9330199F22Rik | 2.327868852 | 1.90754098 | 1.43145161 | 1.1729839 |
| A_66_P1303 | 260.2 Detected   | 1058 Detected    | 330.9 Detected   | 605.5 Detected   | A4galt        | 2.327056111 | 1.27171407 | 0.57230624 | 0.3127599 |
| A_51_P4036 | 37.4 Detected    | 48.5 Detected    | 42.7 Detected    | 87 Detected      | Olf1339       | 2.326203209 | 1.14171123 | 1.79381443 | 0.8804124 |
| A_51_P2595 | 1011.7 Detected  | 1401.4 Detected  | 1405.7 Detected  | 2352.8 Detected  | Angptl6       | 2.32559059  | 1.38944351 | 1.67889254 | 1.0030684 |
| A_55_P2246 | 8.3 Not Detect   | 6.8 Not Detect   | 17 Detected      | 19.3 Not Detect  | Tpm3          | 2.325301205 | 2.04819277 | 2.83823529 | 2.5       |
| A_51_P4887 | 4 Not Detect     | 81.8 Detected    | 3.3 Not Detect   | 9.3 Not Detect   | Zfp612        | 2.325       | 0.825      | 0.11369193 | 0.0403423 |
| A_65_P0295 | 5937.1 Detected  | 6158.1 Detected  | 9452.9 Detected  | 13799.5 Detected | Rnf13         | 2.324282899 | 1.59217463 | 2.24086975 | 1.5350352 |
| A_51_P4166 | 154.4 Detected   | 176.1 Detected   | 240.9 Detected   | 358.8 Detected   | 1810058I24Rik | 2.323834197 | 1.56023316 | 2.03747871 | 1.3679727 |
| A_52_P6675 | 105 Detected     | 96.9 Detected    | 95.8 Detected    | 244 Detected     | Inadl         | 2.323809524 | 0.91238095 | 2.51805986 | 0.9886481 |

|            |         |            |         |            |         |            |         |            |               |             |            |            |           |
|------------|---------|------------|---------|------------|---------|------------|---------|------------|---------------|-------------|------------|------------|-----------|
| A_52_P1214 | 180.4   | Detected   | 163.8   | Detected   | 294.6   | Detected   | 419.2   | Detected   | Msrb3         | 2.323725055 | 1.63303769 | 2.55921856 | 1.7985348 |
| A_55_P2061 | 26.3    | Detected   | 17.1    | Detected   | 50.5    | Detected   | 61.1    | Detected   | Tbx6          | 2.323193916 | 1.92015209 | 3.57309942 | 2.9532164 |
| A_55_P1983 | 42586.7 | Detected   | 52096.8 | Detected   | 99005.3 | Detected   | 98933.6 | Detected   | Lsr           | 2.323110267 | 2.32479389 | 1.89903411 | 1.9004104 |
| A_52_P5906 | 42.3    | Detected   | 32.7    | Detected   | 33.8    | Detected   | 98.2    | Detected   | Eef2k         | 2.321513002 | 0.79905437 | 3.0030581  | 1.0336391 |
| A_55_P2030 | 53.5    | Detected   | 103.5   | Detected   | 52      | Detected   | 124.2   | Detected   | Cln3          | 2.321495327 | 0.97196262 | 1.2        | 0.5024155 |
| A_55_P2026 | 272.2   | Detected   | 287.6   | Detected   | 320.5   | Detected   | 631.3   | Detected   | Zmat1         | 2.319250551 | 1.17744306 | 2.19506259 | 1.114395  |
| A_55_P2319 | 16      | Detected   | 212.3   | Detected   | 4.5     | Not Detect | 37.1    | Not Detect | 9430076C15Rik | 2.31875     | 0.28125    | 0.17475271 | 0.0211964 |
| A_52_P1772 | 37.4    | Detected   | 24.7    | Detected   | 78.2    | Detected   | 86.7    | Detected   | Mtl5          | 2.318181818 | 2.09090909 | 3.51012146 | 3.1659919 |
| A_52_P6138 | 4.1     | Not Detect | 3.3     | Not Detect | 29      | Detected   | 9.5     | Not Detect | Defb39        | 2.317073171 | 7.07317073 | 2.87878788 | 8.7878788 |
| A_66_P1067 | 53.1    | Detected   | 94.2    | Detected   | 143.8   | Detected   | 123     | Detected   | Adam32        | 2.316384181 | 2.70809793 | 1.30573248 | 1.5265393 |
| A_55_P2051 | 2928.6  | Detected   | 3852.6  | Detected   | 6237.4  | Detected   | 6783.1  | Detected   | Elmod3        | 2.316157891 | 2.12982312 | 1.76065514 | 1.6190105 |
| A_52_P5810 | 169.6   | Detected   | 287.9   | Detected   | 364.5   | Detected   | 392.8   | Detected   | Arhgap42      | 2.316037736 | 2.14917453 | 1.36436263 | 1.2660646 |
| A_66_P1382 | 231.7   | Detected   | 433.3   | Detected   | 301     | Detected   | 536.6   | Detected   | Rdh5          | 2.315925766 | 1.29909366 | 1.23840295 | 0.6946688 |
| A_55_P2075 | 2186.2  | Detected   | 2501.7  | Detected   | 2500.1  | Detected   | 5061.6  | Detected   | Tor3a         | 2.315250206 | 1.14358247 | 2.02326418 | 0.9993604 |
| A_55_P2175 | 1631.5  | Detected   | 2388    | Detected   | 1967.2  | Detected   | 3774.9  | Detected   | Ppapdc1b      | 2.313760343 | 1.20576157 | 1.58077889 | 0.8237856 |
| A_55_P2124 | 128.9   | Detected   | 281     | Detected   | 200.9   | Detected   | 298.2   | Detected   | Mpzl3         | 2.313421257 | 1.55857254 | 1.06120996 | 0.7149466 |
| A_51_P2142 | 24.6    | Detected   | 47.7    | Detected   | 53.2    | Detected   | 56.9    | Detected   | Rnls          | 2.31300813  | 2.16260163 | 1.19287212 | 1.115304  |
| A_55_P2128 | 1422.8  | Detected   | 770.6   | Detected   | 1407.5  | Detected   | 3290    | Detected   | Ociad2        | 2.312341861 | 0.98924656 | 4.26940047 | 1.8264988 |
| A_55_P2011 | 26.7    | Detected   | 40      | Detected   | 28.1    | Detected   | 61.7    | Detected   | LOC101055654  | 2.310861423 | 1.05243446 | 1.5425     | 0.7025    |
| A_55_P2031 | 106.2   | Detected   | 273.3   | Detected   | 1070.1  | Detected   | 245.4   | Detected   | 2210404O07Rik | 2.310734463 | 10.0762712 | 0.89791438 | 3.9154775 |
| A_55_P2044 | 260.1   | Detected   | 399.2   | Detected   | 415.9   | Detected   | 600.9   | Detected   | Fgfbp3        | 2.310265283 | 1.59900038 | 1.50526052 | 1.0418337 |
| A_52_P1641 | 4784.7  | Detected   | 7001.3  | Detected   | 5630.5  | Detected   | 11050.6 | Detected   | Cyp51         | 2.309570088 | 1.17677179 | 1.57836402 | 0.8042078 |
| A_51_P1176 | 9660    | Detected   | 9282.5  | Detected   | 18181.2 | Detected   | 22300.3 | Detected   | Ethe1         | 2.308519669 | 1.8821118  | 2.40240237 | 1.9586534 |
| A_52_P6187 | 1769.9  | Detected   | 1687.6  | Detected   | 4604.3  | Detected   | 4084.1  | Detected   | Ermp1         | 2.307531499 | 2.60144641 | 2.420064   | 2.7283124 |
| A_55_P2021 | 4207.2  | Detected   | 3075.7  | Detected   | 5184.7  | Detected   | 9705.5  | Detected   | Hpse          | 2.306878684 | 1.2323398  | 3.15554183 | 1.6856976 |
| A_55_P2097 | 86.1    | Detected   | 159.5   | Detected   | 98.8    | Detected   | 198.6   | Detected   | Cnep1r1       | 2.306620209 | 1.1475029  | 1.24514107 | 0.6194357 |
| A_52_P5708 | 105.4   | Detected   | 185.5   | Detected   | 139.8   | Detected   | 243.1   | Detected   | Klhl5         | 2.306451613 | 1.32637571 | 1.31051213 | 0.7536388 |
| A_55_P2077 | 22.9    | Detected   | 30.5    | Detected   | 28.1    | Detected   | 52.8    | Detected   | Arhgef4       | 2.305676856 | 1.22707424 | 1.73114754 | 0.9213115 |
| A_51_P4485 | 46.8    | Detected   | 56.5    | Detected   | 131.5   | Detected   | 107.9   | Detected   | Klhl35        | 2.305555556 | 2.80982906 | 1.90973451 | 2.3274336 |
| A_55_P2119 | 117.3   | Detected   | 710.6   | Detected   | 67.3    | Detected   | 270.2   | Detected   | Bdh2          | 2.303495311 | 0.57374254 | 0.38024205 | 0.0947087 |
| A_52_P1026 | 1401    | Detected   | 2787.7  | Detected   | 4679    | Detected   | 3225.7  | Detected   | Ecscr         | 2.302426838 | 3.33975732 | 1.15711877 | 1.6784446 |
| A_55_P2025 | 1898.7  | Detected   | 2965.4  | Detected   | 3374.9  | Detected   | 4369.4  | Detected   | Gphn          | 2.301258756 | 1.77747933 | 1.47346058 | 1.1380927 |
| A_52_P4608 | 3893.5  | Detected   | 3184.8  | Detected   | 5892.1  | Detected   | 8954.9  | Detected   | Mvp           | 2.299961474 | 1.51331707 | 2.81176212 | 1.8500691 |
| A_55_P1997 | 463     | Detected   | 1364.9  | Detected   | 784.9   | Detected   | 1064.4  | Detected   | Klra23        | 2.298920086 | 1.69524838 | 0.77983735 | 0.5750604 |
| A_51_P4672 | 1346.6  | Detected   | 2112.7  | Detected   | 2134.7  | Detected   | 3095.1  | Detected   | Polr3gl       | 2.298455369 | 1.58525175 | 1.4649974  | 1.0104132 |
| A_52_P6446 | 798.7   | Detected   | 910.7   | Detected   | 749.6   | Detected   | 1835.7  | Detected   | Flt3l         | 2.298359835 | 0.9385251  | 2.01570221 | 0.8231031 |
| A_52_P3896 | 1454.2  | Detected   | 1373.2  | Detected   | 1286.1  | Detected   | 3341.8  | Detected   | Sap25         | 2.298033283 | 0.8844038  | 2.43358579 | 0.9365715 |
| A_51_P3276 | 804.7   | Detected   | 866.4   | Detected   | 136.6   | Detected   | 1849    | Detected   | Igsf3         | 2.297750715 | 0.1697527  | 2.13411819 | 0.1576639 |
| A_55_P2149 | 6738.5  | Detected   | 3783.1  | Detected   | 12836.6 | Detected   | 15481.2 | Detected   | Fam211a       | 2.297425243 | 1.90496401 | 4.09219952 | 3.3931432 |
| A_51_P1799 | 341.9   | Detected   | 490.1   | Detected   | 758.6   | Detected   | 785.3   | Detected   | Appl2         | 2.29687043  | 2.21877742 | 1.60232606 | 1.5478474 |

|            |         |            |         |            |         |            |         |            |               |             |            |            |           |
|------------|---------|------------|---------|------------|---------|------------|---------|------------|---------------|-------------|------------|------------|-----------|
| A_55_P1978 | 140.5   | Detected   | 234.8   | Detected   | 314.2   | Detected   | 322.7   | Detected   | Srgap1        | 2.296797153 | 2.23629893 | 1.37436116 | 1.3381601 |
| A_55_P2105 | 410.8   | Detected   | 275.7   | Detected   | 486     | Detected   | 942.9   | Detected   | Lrrc56        | 2.295277507 | 1.18305745 | 3.42002176 | 1.7627856 |
| A_55_P2421 | 127.5   | Detected   | 108.7   | Detected   | 171.2   | Detected   | 292.5   | Detected   | 9130604C24Rik | 2.294117647 | 1.3427451  | 2.69089236 | 1.574977  |
| A_52_P6492 | 1367.5  | Detected   | 1551.3  | Detected   | 2264.4  | Detected   | 3135.1  | Detected   | Sash1         | 2.292577697 | 1.65586837 | 2.02095017 | 1.459679  |
| A_55_P1965 | 988.7   | Detected   | 1087.8  | Detected   | 2117.4  | Detected   | 2266.3  | Detected   | Cml1          | 2.292201881 | 2.14160008 | 2.0833793  | 1.9464975 |
| A_55_P2090 | 4.8     | Not Detect | 307.9   | Detected   | 3.8     | Not Detect | 11      | Not Detect | Gm19410       | 2.291666667 | 0.79166667 | 0.03572589 | 0.0123417 |
| A_55_P1980 | 1526.1  | Detected   | 2911.3  | Detected   | 1845.2  | Detected   | 3496.8  | Detected   | 1700007K09Rik | 2.291330843 | 1.20909508 | 1.2011129  | 0.6338062 |
| A_51_P1431 | 33.7    | Detected   | 55.4    | Detected   | 49.7    | Detected   | 77.2    | Detected   | Lyl1          | 2.290801187 | 1.47477745 | 1.39350181 | 0.8971119 |
| A_51_P1754 | 32      | Detected   | 55.6    | Detected   | 51      | Detected   | 73.3    | Detected   | Car14         | 2.290625    | 1.59375    | 1.31834532 | 0.9172662 |
| A_55_P2021 | 11.7    | Not Detect | 21.2    | Detected   | 13.2    | Not Detect | 26.8    | Not Detect | Zcchc14       | 2.290598291 | 1.12820513 | 1.26415094 | 0.6226415 |
| A_55_P2140 | 136.8   | Detected   | 244.8   | Detected   | 195.2   | Detected   | 313.3   | Detected   | Polr3gl       | 2.290204678 | 1.42690058 | 1.27982026 | 0.7973856 |
| A_51_P1348 | 7198.3  | Detected   | 3821.6  | Detected   | 10984.6 | Detected   | 16485   | Detected   | Chac1         | 2.290124057 | 1.52599919 | 4.31363827 | 2.8743458 |
| A_55_P2116 | 17.6    | Detected   | 18.4    | Not Detect | 28.9    | Detected   | 40.3    | Not Detect | Vax1          | 2.289772727 | 1.64204545 | 2.19021739 | 1.5706522 |
| A_55_P2020 | 300.5   | Detected   | 330.4   | Detected   | 433.6   | Detected   | 687.4   | Detected   | Orai3         | 2.287520799 | 1.44292845 | 2.08050847 | 1.3123487 |
| A_51_P3398 | 32      | Detected   | 35      | Detected   | 50.7    | Detected   | 73.2    | Detected   | Arhgap4       | 2.2875      | 1.584375   | 2.09142857 | 1.4485714 |
| A_55_P2164 | 23.4    | Detected   | 33      | Detected   | 42.4    | Detected   | 53.5    | Detected   | Gm960         | 2.286324786 | 1.81196581 | 1.62121212 | 1.2848485 |
| A_55_P2131 | 123.8   | Detected   | 217.4   | Detected   | 145.2   | Detected   | 282.8   | Detected   | Wdr83         | 2.284329564 | 1.17285945 | 1.30082797 | 0.6678933 |
| A_51_P2026 | 66.1    | Detected   | 108.2   | Detected   | 181.4   | Detected   | 150.9   | Detected   | Ebi3          | 2.28290469  | 2.74432678 | 1.39463956 | 1.676525  |
| A_52_P6093 | 28.3    | Detected   | 76.9    | Detected   | 54.3    | Detected   | 64.6    | Detected   | Klhdc8b       | 2.282685512 | 1.91872792 | 0.84005202 | 0.7061118 |
| A_55_P2169 | 70.9    | Detected   | 99.8    | Detected   | 287.3   | Detected   | 161.8   | Detected   | Mfsd4         | 2.282087447 | 4.05218618 | 1.62124248 | 2.8787575 |
| A_55_P2119 | 52.6    | Detected   | 60.2    | Detected   | 155.3   | Detected   | 120     | Detected   | 2610318N02Rik | 2.281368821 | 2.95247148 | 1.99335548 | 2.5797342 |
| A_51_P3235 | 39.1    | Detected   | 47.2    | Detected   | 59.4    | Detected   | 89.2    | Detected   | Fam71e1       | 2.281329923 | 1.51918159 | 1.88983051 | 1.2584746 |
| A_66_P1332 | 2454.5  | Detected   | 3528.9  | Detected   | 2870.7  | Detected   | 5599.5  | Detected   | Mfsd1         | 2.281320024 | 1.1695661  | 1.58675508 | 0.813483  |
| A_55_P2121 | 122.6   | Detected   | 368.2   | Detected   | 9.2     | Not Detect | 279.6   | Detected   | Map3k9        | 2.280587276 | 0.07504078 | 0.75936991 | 0.0249864 |
| A_52_P5150 | 1593    | Detected   | 1452.7  | Detected   | 2537.3  | Detected   | 3632.4  | Detected   | Htati2        | 2.280225989 | 1.59278092 | 2.50044744 | 1.7466098 |
| A_55_P1968 | 106.7   | Detected   | 189.2   | Detected   | 226.2   | Detected   | 243.1   | Detected   | 6330549D23Rik | 2.278350515 | 2.11996251 | 1.28488372 | 1.1955603 |
| A_51_P4752 | 4155.4  | Detected   | 8998.9  | Detected   | 4470.7  | Detected   | 9454.9  | Detected   | Armc6         | 2.275328488 | 1.07587717 | 1.05067286 | 0.4968052 |
| A_55_P2397 | 46.9    | Detected   | 79.2    | Detected   | 51.4    | Detected   | 106.7   | Detected   | D130046C19Rik | 2.275053305 | 1.09594883 | 1.34722222 | 0.6489899 |
| A_65_P1457 | 57.3    | Detected   | 58.8    | Detected   | 53.1    | Detected   | 130.3   | Detected   | Wdr37         | 2.27399651  | 0.92670157 | 2.21598639 | 0.9030612 |
| A_55_P1995 | 3494.7  | Detected   | 5073    | Detected   | 2779.2  | Detected   | 7945    | Detected   | Cobl          | 2.273442642 | 0.7952614  | 1.56613444 | 0.5478415 |
| A_51_P2493 | 24548.5 | Detected   | 27739.8 | Detected   | 35413.2 | Detected   | 55798.1 | Detected   | Suox          | 2.272973909 | 1.44258101 | 2.0114817  | 1.2766206 |
| A_51_P3037 | 1644.2  | Detected   | 3429.8  | Detected   | 1337    | Detected   | 3737    | Detected   | Tmem38a       | 2.272837854 | 0.81316142 | 1.0895679  | 0.3898186 |
| A_51_P2900 | 4.4     | Not Detect | 3461.1  | Detected   | 3.5     | Not Detect | 10      | Not Detect | Fabp7         | 2.272727273 | 0.79545455 | 0.00288925 | 0.0010112 |
| A_55_P1988 | 7528.3  | Detected   | 8326.2  | Detected   | 14410.6 | Detected   | 17107.4 | Detected   | Rnf103        | 2.272412098 | 1.91419045 | 2.05464678 | 1.7307535 |
| A_55_P2033 | 46.1    | Detected   | 623.9   | Detected   | 38.9    | Detected   | 104.7   | Detected   | Fabp3         | 2.271149675 | 0.84381779 | 0.16781536 | 0.0623497 |
| A_51_P2524 | 11569   | Detected   | 21951.5 | Detected   | 14033.7 | Detected   | 26263.9 | Detected   | Cope          | 2.270196214 | 1.21304348 | 1.19645127 | 0.6393048 |
| A_55_P1984 | 35.6    | Detected   | 26.1    | Detected   | 86      | Detected   | 80.8    | Detected   | Lca5l         | 2.269662921 | 2.41573034 | 3.09578544 | 3.2950192 |
| A_51_P4915 | 1981.7  | Detected   | 5496    | Detected   | 3987.4  | Detected   | 4493.6  | Detected   | Aldh5a1       | 2.267548065 | 2.01211081 | 0.81761281 | 0.7255095 |
| A_55_P2107 | 346.9   | Detected   | 352.3   | Detected   | 448.2   | Detected   | 786.3   | Detected   | Rab37         | 2.266647449 | 1.29201499 | 2.23190463 | 1.2722112 |
| A_55_P2051 | 162.9   | Detected   | 310.4   | Detected   | 212.8   | Detected   | 369.2   | Detected   | Gm128         | 2.266421117 | 1.3063229  | 1.18943299 | 0.685567  |



|            |                  |                   |                  |                   |               |             |            |            |           |
|------------|------------------|-------------------|------------------|-------------------|---------------|-------------|------------|------------|-----------|
| A_55_P2161 | 501.2 Detected   | 622.2 Detected    | 867.4 Detected   | 1135.8 Detected   | Coq10a        | 2.266161213 | 1.73064645 | 1.82545805 | 1.3940855 |
| A_55_P2029 | 1387.2 Detected  | 2204 Detected     | 4428.4 Detected  | 3143.6 Detected   | Abhd6         | 2.266147636 | 3.19232987 | 1.42631579 | 2.0092559 |
| A_55_P2173 | 71.1 Detected    | 77.6 Detected     | 157.5 Detected   | 161.1 Detected    | B130034C11Rik | 2.265822785 | 2.21518987 | 2.07603093 | 2.0296392 |
| A_55_P1969 | 1344.5 Detected  | 1588.9 Detected   | 2068.8 Detected  | 3046.3 Detected   | Abcb1a        | 2.265749349 | 1.53871328 | 1.91723834 | 1.3020329 |
| A_55_P1981 | 3680 Detected    | 7529.9 Detected   | 6666 Detected    | 8330.9 Detected   | Grasp         | 2.263831522 | 1.81141304 | 1.10637591 | 0.8852707 |
| A_66_P1344 | 666.8 Detected   | 185.7 Detected    | 1171.1 Detected  | 1509.1 Detected   | Ang3          | 2.263197361 | 1.75629874 | 8.1265482  | 6.3064082 |
| A_55_P1975 | 3.8 Not Detect   | 16.8 Detected     | 8.2 Not Detect   | 8.6 Not Detect    | Galnt6        | 2.263157895 | 2.15789474 | 0.51190476 | 0.4880952 |
| A_51_P4528 | 3280.9 Detected  | 3167.7 Detected   | 7007.5 Detected  | 7423.4 Detected   | Pigyl         | 2.262610869 | 2.13584687 | 2.34346687 | 2.2121729 |
| A_55_P1959 | 523.6 Detected   | 867.6 Detected    | 415.1 Detected   | 1183.6 Detected   | Slc4a4        | 2.260504202 | 0.79278075 | 1.36422314 | 0.4784463 |
| A_52_P2595 | 506.9 Detected   | 875.1 Detected    | 495.4 Detected   | 1144.9 Detected   | Ogfod1        | 2.258630894 | 0.97731308 | 1.30830762 | 0.5661067 |
| A_51_P3059 | 11.6 Not Detect  | 17.2 Detected     | 13.8 Not Detect  | 26.2 Not Detect   | Olfrr620      | 2.25862069  | 1.18965517 | 1.52325581 | 0.8023256 |
| A_52_P6503 | 332.1 Detected   | 469.3 Detected    | 225.4 Detected   | 750 Detected      | Slc35e1       | 2.258355917 | 0.67871123 | 1.59812487 | 0.4802898 |
| A_55_P2065 | 1437.8 Detected  | 2532.1 Detected   | 1840.8 Detected  | 3246.1 Detected   | Btbd19        | 2.257685353 | 1.28028933 | 1.28197938 | 0.7269855 |
| A_55_P2092 | 165.3 Detected   | 128.5 Detected    | 322.1 Detected   | 373.1 Detected    | Foxo6         | 2.257108288 | 1.94857834 | 2.90350195 | 2.5066148 |
| A_51_P3934 | 841.1 Detected   | 578.1 Detected    | 593.9 Detected   | 1897.8 Detected   | Pros1         | 2.256330995 | 0.70609916 | 3.28282304 | 1.0273309 |
| A_55_P1977 | 33.6 Detected    | 42.1 Detected     | 49.2 Detected    | 75.8 Detected     | Ulk4          | 2.255952381 | 1.46428571 | 1.80047506 | 1.1686461 |
| A_66_P1332 | 9 Not Detect     | 16.3 Detected     | 5.4 Not Detect   | 20.3 Not Detect   | Prkch         | 2.255555556 | 0.6        | 1.24539877 | 0.3312883 |
| A_55_P2136 | 59.8 Detected    | 258 Detected      | 314.7 Detected   | 134.8 Detected    | Sult1b1       | 2.254180602 | 5.26254181 | 0.52248062 | 1.2197674 |
| A_55_P2131 | 1102.8 Detected  | 485.3 Detected    | 1658.8 Detected  | 2485.7 Detected   | Ttc39a        | 2.253989844 | 1.5041712  | 5.1219864  | 3.4180919 |
| A_51_P1330 | 302 Detected     | 327.2 Detected    | 500.1 Detected   | 680.4 Detected    | Gm4013        | 2.252980132 | 1.65596026 | 2.0794621  | 1.528423  |
| A_52_P5746 | 5977.7 Detected  | 8443 Detected     | 14644.9 Detected | 13463.5 Detected  | Bid           | 2.252287669 | 2.44992221 | 1.59463461 | 1.7345612 |
| A_55_P2176 | 22.2 Detected    | 19.6 Detected     | 15 Not Detect    | 50 Not Detect     | Pcdh15        | 2.252252252 | 0.67567568 | 2.55102041 | 0.7653061 |
| A_51_P4287 | 130.6 Detected   | 140 Detected      | 203.6 Detected   | 294.1 Detected    | Pbx4          | 2.251914242 | 1.55895865 | 2.10071429 | 1.4542857 |
| A_55_P2209 | 23.9 Detected    | 24.7 Detected     | 50.3 Detected    | 53.8 Detected     | B830008H07Rik | 2.251046025 | 2.10460251 | 2.17813765 | 2.0364372 |
| A_55_P2170 | 178.1 Detected   | 277.7 Detected    | 232.8 Detected   | 400.8 Detected    | Zfp949        | 2.250421112 | 1.30713083 | 1.44328412 | 0.8383147 |
| A_52_P4565 | 356.7 Detected   | 180.3 Detected    | 721.7 Detected   | 802.1 Detected    | Abcd1         | 2.248668349 | 2.02326885 | 4.44869662 | 4.0027732 |
| A_55_P2212 | 55.6 Detected    | 76.4 Detected     | 31.2 Detected    | 125 Detected      | C80012        | 2.248201439 | 0.56115108 | 1.63612565 | 0.408377  |
| A_51_P4556 | 2885.1 Detected  | 3980.9 Detected   | 4062.6 Detected  | 6485.8 Detected   | Car2          | 2.248032997 | 1.40813143 | 1.62922957 | 1.020523  |
| A_55_P2178 | 23 Detected      | 34.4 Detected     | 21 Detected      | 51.7 Detected     | Fam53b        | 2.247826087 | 0.91304348 | 1.50290698 | 0.6104651 |
| A_52_P1817 | 767.5 Detected   | 877.6 Detected    | 911.4 Detected   | 1724.8 Detected   | Eif5a2        | 2.247296417 | 1.18749186 | 1.96536007 | 1.0385141 |
| A_51_P1868 | 378.9 Detected   | 730.4 Detected    | 331.3 Detected   | 851.4 Detected    | Egln1         | 2.247030879 | 0.87437319 | 1.16566265 | 0.4535871 |
| A_51_P3326 | 2301 Detected    | 3222.6 Detected   | 3913.5 Detected  | 5169.3 Detected   | Pqlc3         | 2.246544498 | 1.70078227 | 1.60407745 | 1.2143921 |
| A_51_P1259 | 337.8 Detected   | 443.4 Detected    | 477.8 Detected   | 758.7 Detected    | Gan           | 2.246003552 | 1.41444642 | 1.71109608 | 1.0775823 |
| A_55_P2176 | 116.6 Detected   | 128.8 Detected    | 116.6 Detected   | 261.8 Detected    | Pgc           | 2.245283019 | 1          | 2.0326087  | 0.9052795 |
| A_52_P5993 | 4.5 Not Detect   | 74.4 Detected     | 197.3 Detected   | 10.1 Not Detect   | Hs6st2        | 2.244444444 | 43.8444444 | 0.13575269 | 2.6518817 |
| A_55_P2101 | 53046.4 Detected | 116727.8 Detected | 85559.3 Detected | 119057.4 Detected | Aldh3a1       | 2.244401128 | 1.61291435 | 1.01995754 | 0.7329813 |
| A_52_P2177 | 69.2 Detected    | 88.5 Detected     | 112.7 Detected   | 155.3 Detected    | Ift46         | 2.244219653 | 1.62861272 | 1.75480226 | 1.2734463 |
| A_66_P1017 | 3.7 Not Detect   | 21.6 Detected     | 3 Not Detect     | 8.3 Not Detect    | Fam124a       | 2.243243243 | 0.81081081 | 0.38425926 | 0.1388889 |
| A_52_P2980 | 543.6 Detected   | 468.1 Detected    | 628.2 Detected   | 1219.4 Detected   | Gch1          | 2.243193525 | 1.15562914 | 2.60499893 | 1.3420209 |
| A_55_P2170 | 104.5 Detected   | 145.3 Detected    | 138.5 Detected   | 234.4 Detected    | Sfn           | 2.243062201 | 1.32535885 | 1.61321404 | 0.9532003 |

|            |                  |                  |                  |                  |               |             |            |            |           |
|------------|------------------|------------------|------------------|------------------|---------------|-------------|------------|------------|-----------|
| A_55_P2110 | 147.7 Detected   | 200.5 Detected   | 242.9 Detected   | 331.2 Detected   | Echdc1        | 2.242383209 | 1.64454976 | 1.65187032 | 1.2114713 |
| A_55_P2116 | 41.3 Detected    | 65.6 Detected    | 53 Detected      | 92.6 Detected    | Trim45        | 2.242130751 | 1.28329298 | 1.41158537 | 0.8079268 |
| A_51_P3299 | 2674.7 Detected  | 4077.4 Detected  | 4462.3 Detected  | 5995.2 Detected  | D6Wsu163e     | 2.241447639 | 1.66833664 | 1.47034875 | 1.0943984 |
| A_52_P2328 | 530.3 Detected   | 818.6 Detected   | 1118.4 Detected  | 1188.2 Detected  | Tbx15         | 2.240618518 | 2.10899491 | 1.45150257 | 1.366235  |
| A_55_P1955 | 1307.4 Detected  | 2039.8 Detected  | 1776.6 Detected  | 2929.3 Detected  | Slc25a42      | 2.240553771 | 1.35888022 | 1.43607216 | 0.8709677 |
| A_55_P1977 | 6251.5 Detected  | 11799.5 Detected | 5287.2 Detected  | 13997.4 Detected | Palld         | 2.239046629 | 0.84574902 | 1.1862706  | 0.4480868 |
| A_51_P3927 | 42.6 Detected    | 58.6 Detected    | 39 Detected      | 95.2 Detected    | Eml6          | 2.234741784 | 0.91549296 | 1.62457338 | 0.665529  |
| A_66_P1368 | 35 Detected      | 36.8 Detected    | 47.4 Detected    | 78.2 Detected    | Dppa2         | 2.234285714 | 1.35428571 | 2.125      | 1.2880435 |
| A_55_P2115 | 34.6 Detected    | 12 Not Detect    | 98.8 Detected    | 77.3 Detected    | Acnat1        | 2.234104046 | 2.85549133 | 6.44166667 | 8.2333333 |
| A_55_P2027 | 23.1 Detected    | 8.9 Not Detect   | 13.4 Not Detect  | 51.6 Detected    | Rbmxl2        | 2.233766234 | 0.58008658 | 5.79775281 | 1.505618  |
| A_66_P1373 | 16.3 Detected    | 17.2 Detected    | 23.5 Detected    | 36.4 Not Detect  | Gm5606        | 2.233128834 | 1.44171779 | 2.11627907 | 1.3662791 |
| A_55_P2034 | 94.5 Detected    | 128.8 Detected   | 80.5 Detected    | 211 Detected     | Zfp157        | 2.232804233 | 0.85185185 | 1.63819876 | 0.625     |
| A_51_P1847 | 583.2 Detected   | 780.7 Detected   | 951.8 Detected   | 1301.9 Detected  | Cnksr3        | 2.23233882  | 1.63203018 | 1.66760599 | 1.2191623 |
| A_55_P2149 | 112.5 Detected   | 534.6 Detected   | 182.5 Detected   | 251 Detected     | Ninj2         | 2.231111111 | 1.62222222 | 0.46950991 | 0.3413767 |
| A_52_P2407 | 7.8 Not Detect   | 11.6 Not Detect  | 28.1 Detected    | 17.4 Not Detect  | Cml2          | 2.230769231 | 3.6025641  | 1.5        | 2.4224138 |
| A_55_P2112 | 447.6 Detected   | 452.6 Detected   | 803 Detected     | 998.4 Detected   | Pcyt2         | 2.230563003 | 1.79401251 | 2.20592134 | 1.7741935 |
| A_52_P7978 | 580.4 Detected   | 482 Detected     | 1367.3 Detected  | 1294.3 Detected  | Wnt7a         | 2.230013784 | 2.35578911 | 2.68526971 | 2.836722  |
| A_55_P2111 | 16419.9 Detected | 15193.9 Detected | 23000.1 Detected | 36615.8 Detected | Gale          | 2.22996486  | 1.40074544 | 2.40990134 | 1.513772  |
| A_55_P2077 | 50.5 Detected    | 119.5 Detected   | 15.4 Detected    | 112.6 Detected   | Rhpn1         | 2.22970297  | 0.3049505  | 0.94225941 | 0.1288703 |
| A_51_P5039 | 2512.7 Detected  | 3661.6 Detected  | 3161.4 Detected  | 5601.6 Detected  | Calm1         | 2.229315079 | 1.2581685  | 1.52982303 | 0.8633931 |
| A_52_P4213 | 241.6 Detected   | 188.7 Detected   | 2030.3 Detected  | 538.6 Detected   | Paqr5         | 2.229304636 | 8.4035596  | 2.85426603 | 10.759406 |
| A_55_P1961 | 35.5 Detected    | 29.1 Detected    | 29.6 Detected    | 79.1 Detected    | Gm15217       | 2.228169014 | 0.83380282 | 2.71821306 | 1.0171821 |
| A_55_P2002 | 1012.8 Detected  | 1099.7 Detected  | 1679 Detected    | 2256.1 Detected  | Rps6kb2       | 2.227586888 | 1.65778041 | 2.05155952 | 1.52678   |
| A_52_P2570 | 122.3 Detected   | 193 Detected     | 216.3 Detected   | 272.4 Detected   | Nudt6         | 2.227309894 | 1.7686018  | 1.41139896 | 1.1207254 |
| A_55_P2128 | 434.5 Detected   | 2032.7 Detected  | 40.4 Detected    | 967.4 Detected   | Col6a1        | 2.226467204 | 0.09298044 | 0.47591873 | 0.019875  |
| A_55_P2047 | 113.2 Detected   | 97.1 Detected    | 213.3 Detected   | 252 Detected     | Slc37a4       | 2.22614841  | 1.88427562 | 2.59526262 | 2.1967044 |
| A_55_P2006 | 10.2 Not Detect  | 23 Detected      | 13.4 Not Detect  | 22.7 Not Detect  | Olfir282      | 2.225490196 | 1.31372549 | 0.98695652 | 0.5826087 |
| A_55_P1977 | 692.9 Detected   | 637.6 Detected   | 682.1 Detected   | 1542 Detected    | Vps13d        | 2.225429355 | 0.98441334 | 2.41844417 | 1.069793  |
| A_55_P2068 | 216 Detected     | 258.8 Detected   | 207.5 Detected   | 480.4 Detected   | Ccng2         | 2.224074074 | 0.96064815 | 1.85625966 | 0.8017774 |
| A_55_P2122 | 2303.1 Detected  | 3358.9 Detected  | 3444.5 Detected  | 5118 Detected    | Gpr19         | 2.222222222 | 1.4955929  | 1.52371312 | 1.0254845 |
| A_55_P2049 | 1424.6 Detected  | 1327.3 Detected  | 1182.9 Detected  | 3164.9 Detected  | Tm6sf2        | 2.221606065 | 0.83033834 | 2.3844647  | 0.8912077 |
| A_51_P1817 | 2261.9 Detected  | 3425.4 Detected  | 4431.4 Detected  | 5023.6 Detected  | Rbks          | 2.220964676 | 1.95914939 | 1.46657325 | 1.2936883 |
| A_55_P2007 | 29.9 Detected    | 53.8 Detected    | 32.6 Detected    | 66.4 Detected    | Prss27        | 2.220735786 | 1.090301   | 1.23420074 | 0.605948  |
| A_51_P3359 | 475.8 Detected   | 536.3 Detected   | 681.4 Detected   | 1056.6 Detected  | Narf          | 2.220680958 | 1.43211433 | 1.97016595 | 1.2705575 |
| A_55_P2144 | 56.3 Detected    | 70 Detected      | 95.1 Detected    | 125 Detected     | BC033916      | 2.220248668 | 1.68916519 | 1.78571429 | 1.3585714 |
| A_55_P2136 | 281.1 Detected   | 121.3 Detected   | 104.8 Detected   | 624.1 Detected   | Coro2b        | 2.220206332 | 0.37282106 | 5.14509481 | 0.8639736 |
| A_55_P2020 | 87.1 Detected    | 105.7 Detected   | 72.2 Detected    | 193.3 Detected   | Scml4         | 2.219288175 | 0.82893226 | 1.82876064 | 0.6830653 |
| A_55_P2041 | 557.7 Detected   | 1074.5 Detected  | 407.2 Detected   | 1237.4 Detected  | Gas2          | 2.218755603 | 0.73014165 | 1.1516054  | 0.378967  |
| A_55_P1986 | 75.1 Detected    | 127 Detected     | 82.7 Detected    | 166.6 Detected   | 3110070M22Rik | 2.218375499 | 1.1011984  | 1.31181102 | 0.6511811 |
| A_52_P5043 | 5203.6 Detected  | 5848 Detected    | 4409 Detected    | 11542.3 Detected | Ankib1        | 2.218137443 | 0.84729802 | 1.97371751 | 0.753933  |

|            |                  |                  |                  |                  |               |             |            |            |           |
|------------|------------------|------------------|------------------|------------------|---------------|-------------|------------|------------|-----------|
| A_55_P2100 | 18.4 Detected    | 5.2 Not Detect   | 39.9 Detected    | 40.8 Not Detect  | E130309D14Rik | 2.217391304 | 2.16847826 | 7.84615385 | 7.6730769 |
| A_55_P2330 | 39.1 Detected    | 154.2 Detected   | 81.9 Detected    | 86.7 Detected    | A730090N16Rik | 2.217391304 | 2.09462916 | 0.56225681 | 0.5311284 |
| A_51_P3822 | 880.4 Detected   | 725 Detected     | 3037.6 Detected  | 1952 Detected    | Rab17         | 2.217174012 | 3.45024989 | 2.69241379 | 4.1897931 |
| A_51_P1813 | 566.4 Detected   | 908.6 Detected   | 902.3 Detected   | 1255.6 Detected  | Dcxr          | 2.21680791  | 1.59304379 | 1.38190623 | 0.9930663 |
| A_55_P1969 | 161.5 Detected   | 363.4 Detected   | 295.5 Detected   | 358 Detected     | Col4a5        | 2.216718266 | 1.82972136 | 0.98514034 | 0.8131535 |
| A_52_P2782 | 1741.9 Detected  | 1706.1 Detected  | 2472.9 Detected  | 3853.2 Detected  | Pear1         | 2.212067283 | 1.4196567  | 2.25848426 | 1.4494461 |
| A_65_P1035 | 903.2 Detected   | 1295.5 Detected  | 1571.3 Detected  | 1996.5 Detected  | Atp2b1        | 2.210473871 | 1.73970328 | 1.54110382 | 1.2128908 |
| A_51_P4395 | 47.1 Detected    | 43.7 Detected    | 50.4 Detected    | 104.1 Detected   | Rhov          | 2.210191083 | 1.07006369 | 2.38215103 | 1.1533181 |
| A_52_P5598 | 6596.9 Detected  | 6153 Detected    | 8503.6 Detected  | 14576.6 Detected | Arhgef12      | 2.209613606 | 1.2890297  | 2.36902324 | 1.382025  |
| A_55_P2029 | 387.4 Detected   | 524 Detected     | 530.2 Detected   | 856 Detected     | Pex11g        | 2.209602478 | 1.36861125 | 1.63358779 | 1.0118321 |
| A_55_P1981 | 35.9 Detected    | 51.6 Detected    | 48.9 Detected    | 79.3 Detected    | Ercc6l2       | 2.208913649 | 1.36211699 | 1.53682171 | 0.9476744 |
| A_55_P2019 | 936.5 Detected   | 1004 Detected    | 1431.4 Detected  | 2068.5 Detected  | Spire1        | 2.208756006 | 1.52845702 | 2.06025896 | 1.4256972 |
| A_55_P2089 | 415 Detected     | 284.9 Detected   | 631.2 Detected   | 916.6 Detected   | 4933431K14Rik | 2.208674699 | 1.52096386 | 3.21726922 | 2.2155142 |
| A_55_P1958 | 42.3 Detected    | 114.2 Detected   | 86.2 Detected    | 93.4 Detected    | Cxxc4         | 2.208037825 | 2.03782506 | 0.8178634  | 0.7548161 |
| A_55_P2035 | 5581.8 Detected  | 5321.4 Detected  | 9673.7 Detected  | 12320.2 Detected | Gucd1         | 2.207209144 | 1.73307894 | 2.3152178  | 1.8178863 |
| A_55_P1967 | 589.6 Detected   | 907.8 Detected   | 462 Detected     | 1301.1 Detected  | Slc4a4        | 2.206750339 | 0.78358209 | 1.43324521 | 0.5089227 |
| A_55_P2105 | 3966.5 Detected  | 8217.5 Detected  | 6465.5 Detected  | 8752.8 Detected  | G6pc3         | 2.206680953 | 1.63002647 | 1.06514147 | 0.7867965 |
| A_55_P2156 | 236.7 Detected   | 565.6 Detected   | 717.8 Detected   | 522.1 Detected   | Pick1         | 2.20574567  | 3.03253063 | 0.92309052 | 1.2690948 |
| A_55_P2097 | 66.6 Detected    | 58.9 Detected    | 77.8 Detected    | 146.9 Detected   | Olf1r122      | 2.205705706 | 1.16816817 | 2.49405772 | 1.3208829 |
| A_55_P1989 | 15476 Detected   | 19440.2 Detected | 18424.8 Detected | 34130.8 Detected | C2cd2l        | 2.205401913 | 1.19054019 | 1.75568153 | 0.947768  |
| A_55_P2139 | 3209.2 Detected  | 3311.7 Detected  | 5647.8 Detected  | 7076.8 Detected  | Acbd4         | 2.205160165 | 1.75987785 | 2.13690854 | 1.7054081 |
| A_55_P2048 | 5918.4 Detected  | 7302.3 Detected  | 10972.3 Detected | 13050 Detected   | Golph3l       | 2.204987835 | 1.85393012 | 1.78710817 | 1.5025814 |
| A_66_P1240 | 19834.1 Detected | 23841.6 Detected | 37420.2 Detected | 43731.3 Detected | Bok           | 2.204854266 | 1.88665984 | 1.83424351 | 1.5695339 |
| A_51_P4979 | 670.4 Detected   | 426.4 Detected   | 3313.1 Detected  | 1477.5 Detected  | C2            | 2.203908115 | 4.94197494 | 3.46505629 | 7.7699343 |
| A_55_P2065 | 41116.8 Detected | 95488 Detected   | 69237.4 Detected | 90589.4 Detected | Aldh3a1       | 2.203221068 | 1.68391995 | 0.94869931 | 0.7250901 |
| A_55_P1987 | 991.1 Detected   | 1061.4 Detected  | 1247.9 Detected  | 2182.2 Detected  | Tpp1          | 2.201795984 | 1.25910604 | 2.05596382 | 1.1757113 |
| A_51_P4263 | 18.4 Detected    | 23.4 Detected    | 17.6 Detected    | 40.5 Not Detect  | Tssk1         | 2.201086957 | 0.95652174 | 1.73076923 | 0.7521368 |
| A_51_P1554 | 374.8 Detected   | 2338.3 Detected  | 743.2 Detected   | 823.3 Detected   | Dok7          | 2.196638207 | 1.98292423 | 0.3520934  | 0.3178377 |
| A_55_P1969 | 4628.5 Detected  | 6353 Detected    | 10322 Detected   | 10166.3 Detected | Gramd1b       | 2.196456735 | 2.23009614 | 1.60023611 | 1.6247442 |
| A_55_P2378 | 5.6 Not Detect   | 61 Detected      | 14 Not Detect    | 12.3 Not Detect  | Kcnma1        | 2.196428571 | 2.5        | 0.20163934 | 0.2295082 |
| A_55_P2266 | 353 Detected     | 733.6 Detected   | 373.9 Detected   | 774.6 Detected   | 6330522J23Rik | 2.194334278 | 1.0592068  | 1.05588877 | 0.5096783 |
| A_52_P1057 | 356.1 Detected   | 490.1 Detected   | 571.1 Detected   | 781.4 Detected   | Cdc42bpg      | 2.194327436 | 1.60376299 | 1.5943685  | 1.1652724 |
| A_55_P2099 | 19.2 Detected    | 85.6 Detected    | 27.8 Detected    | 42.1 Detected    | LOC100504608  | 2.192708333 | 1.44791667 | 0.49182243 | 0.3247664 |
| A_55_P2114 | 1779 Detected    | 2267.7 Detected  | 2061.9 Detected  | 3900 Detected    | Nek3          | 2.192242833 | 1.15902192 | 1.71980421 | 0.9092473 |
| A_52_P6019 | 938.2 Detected   | 985 Detected     | 1837.9 Detected  | 2055.2 Detected  | Mtch2         | 2.190577702 | 1.95896397 | 2.08649746 | 1.8658883 |
| A_51_P4641 | 4.2 Not Detect   | 35.2 Detected    | 3.2 Not Detect   | 9.2 Not Detect   | Sowahb        | 2.19047619  | 0.76190476 | 0.26136364 | 0.0909091 |
| A_55_P2109 | 2500 Detected    | 7093.1 Detected  | 5373.6 Detected  | 5475.6 Detected  | Trnt1         | 2.19024     | 2.14944    | 0.77196148 | 0.7575813 |
| A_52_P1948 | 216.6 Detected   | 141.2 Detected   | 98.5 Detected    | 474.4 Detected   | 2410089E03Rik | 2.190212373 | 0.45475531 | 3.35977337 | 0.6975921 |
| A_55_P1960 | 14032.7 Detected | 23350.4 Detected | 17103.1 Detected | 30733.2 Detected | BC056474      | 2.190113093 | 1.21880322 | 1.31617446 | 0.7324543 |
| A_55_P2014 | 104 Detected     | 141.5 Detected   | 1373.5 Detected  | 227.6 Detected   | Il17re        | 2.188461538 | 13.2067308 | 1.60848057 | 9.7067138 |

|            |         |            |         |            |          |            |         |            |               |             |            |            |           |
|------------|---------|------------|---------|------------|----------|------------|---------|------------|---------------|-------------|------------|------------|-----------|
| A_51_P2044 | 2490.3  | Detected   | 4027.1  | Detected   | 2131.6   | Detected   | 5449.9  | Detected   | Phf19         | 2.188451191 | 0.85596113 | 1.35330635 | 0.5293139 |
| A_51_P2572 | 6724.3  | Detected   | 5924.5  | Detected   | 8019     | Detected   | 14715.1 | Detected   | Cpox          | 2.188346742 | 1.19254049 | 2.48377078 | 1.3535319 |
| A_55_P2232 | 352.7   | Detected   | 518.5   | Detected   | 504      | Detected   | 771.8   | Detected   | Smarcal1      | 2.188261979 | 1.42897647 | 1.48852459 | 0.9720347 |
| A_55_P1985 | 3522.1  | Detected   | 4330.5  | Detected   | 4391.3   | Detected   | 7706.4  | Detected   | Dock6         | 2.188012833 | 1.24678459 | 1.77956356 | 1.0140399 |
| A_55_P2181 | 116     | Detected   | 220.3   | Detected   | 118      | Detected   | 253.8   | Detected   | Cdh11         | 2.187931034 | 1.01724138 | 1.15206537 | 0.5356332 |
| A_55_P2076 | 116.3   | Detected   | 258.2   | Detected   | 187.9    | Detected   | 254.4   | Detected   | Mpzl3         | 2.18744626  | 1.61564918 | 0.98528273 | 0.7277304 |
| A_55_P2135 | 270.1   | Detected   | 296.7   | Detected   | 107      | Detected   | 590.7   | Detected   | Nol3          | 2.18696779  | 0.39614957 | 1.9908999  | 0.3606336 |
| A_51_P4034 | 10.7    | Not Detect | 15.3    | Not Detect | 106      | Detected   | 23.4    | Not Detect | Dio1          | 2.186915888 | 9.90654206 | 1.52941176 | 6.9281046 |
| A_51_P1914 | 4111    | Detected   | 7099.4  | Detected   | 7183.5   | Detected   | 8990.3  | Detected   | H2-M2         | 2.186888835 | 1.74738506 | 1.26634645 | 1.0118461 |
| A_52_P6738 | 295.8   | Detected   | 279.9   | Detected   | 395      | Detected   | 646.8   | Detected   | Cdkn1b        | 2.186612576 | 1.33536173 | 2.31082529 | 1.4112183 |
| A_52_P2205 | 104.1   | Detected   | 200.9   | Detected   | 191.3    | Detected   | 227.6   | Detected   | Serpini1      | 2.18635927  | 1.8376561  | 1.13290194 | 0.952215  |
| A_52_P3202 | 53.8    | Detected   | 79.2    | Detected   | 85.6     | Detected   | 117.6   | Detected   | Inca1         | 2.185873606 | 1.59107807 | 1.48484848 | 1.0808081 |
| A_55_P2090 | 28      | Detected   | 2129.8  | Detected   | 3        | Not Detect | 61.2    | Detected   | Dync1i1       | 2.185714286 | 0.10714286 | 0.02873509 | 0.0014086 |
| A_51_P3756 | 2409.9  | Detected   | 2423.2  | Detected   | 5091.7   | Detected   | 5267.3  | Detected   | Tmem135       | 2.185692352 | 2.11282626 | 2.17369594 | 2.1012298 |
| A_51_P3637 | 7763.2  | Detected   | 9873.2  | Detected   | 13810.9  | Detected   | 16964.8 | Detected   | Stx7          | 2.185284419 | 1.77902154 | 1.71826763 | 1.3988271 |
| A_55_P2117 | 808.4   | Detected   | 2682.3  | Detected   | 1350.2   | Detected   | 1766.4  | Detected   | Cyp4b1        | 2.185056903 | 1.67021277 | 0.65853931 | 0.503374  |
| A_52_P2877 | 134.6   | Detected   | 235.6   | Detected   | 195      | Detected   | 294.1   | Detected   | Engase        | 2.184992571 | 1.448737   | 1.24830221 | 0.827674  |
| A_51_P2357 | 1281.3  | Detected   | 2008.5  | Detected   | 2755.5   | Detected   | 2799.5  | Detected   | Icam4         | 2.184890346 | 2.15055022 | 1.39382624 | 1.3719193 |
| A_66_P1144 | 596.6   | Detected   | 798.3   | Detected   | 756.8    | Detected   | 1303.2  | Detected   | Gpr126        | 2.184378143 | 1.26852162 | 1.632469   | 0.9480145 |
| A_55_P1980 | 18.5    | Detected   | 25      | Detected   | 15.6     | Not Detect | 40.4    | Not Detect | Kcnrg         | 2.183783784 | 0.84324324 | 1.616      | 0.624     |
| A_55_P2177 | 52.9    | Detected   | 140.1   | Detected   | 76.9     | Detected   | 115.5   | Detected   | Tmem208       | 2.183364839 | 1.4536862  | 0.82441113 | 0.5488936 |
| A_55_P2102 | 21597.7 | Detected   | 21559.6 | Detected   | 18943.4  | Detected   | 47130.6 | Detected   | Eaf2          | 2.182204587 | 0.87710265 | 2.18606097 | 0.8786527 |
| A_55_P2067 | 927.6   | Detected   | 1070.6  | Detected   | 1750.2   | Detected   | 2023.9  | Detected   | Clmp          | 2.181867184 | 1.88680466 | 1.89043527 | 1.6347842 |
| A_55_P2079 | 4.4     | Not Detect | 3.4     | Not Detect | 33.3     | Detected   | 9.6     | Not Detect | Scgb1b20      | 2.181818182 | 7.56818182 | 2.82352941 | 9.7941176 |
| A_51_P1742 | 4.4     | Not Detect | 17.3    | Detected   | 3.5      | Not Detect | 9.6     | Not Detect | Dhrs2         | 2.181818182 | 0.79545455 | 0.55491329 | 0.2023121 |
| A_52_P5663 | 880.3   | Detected   | 908.5   | Detected   | 1144     | Detected   | 1920.3  | Detected   | Zfyve26       | 2.181415427 | 1.29955697 | 2.11370391 | 1.2592185 |
| A_55_P2071 | 392.9   | Detected   | 332     | Detected   | 493.1    | Detected   | 857     | Detected   | Nav2          | 2.181216595 | 1.25502672 | 2.5813253  | 1.485241  |
| A_52_P5586 | 385     | Detected   | 312.6   | Detected   | 410.8    | Detected   | 839.7   | Detected   | Clec16a       | 2.181038961 | 1.06701299 | 2.68618042 | 1.3141395 |
| A_55_P1981 | 762     | Detected   | 1256.4  | Detected   | 1122.9   | Detected   | 1661.8  | Detected   | Nr2c1         | 2.180839895 | 1.47362205 | 1.32266794 | 0.893744  |
| A_55_P2013 | 64341.4 | Detected   | 78006.5 | Detected   | 101416.7 | Detected   | 140285  | Detected   | Krt42         | 2.180322467 | 1.57622775 | 1.79837578 | 1.3001058 |
| A_66_P1357 | 686.5   | Detected   | 674.3   | Detected   | 1303.9   | Detected   | 1496.3  | Detected   | Cyp2d11       | 2.179606701 | 1.8993445  | 2.21904197 | 1.933709  |
| A_55_P2427 | 767.6   | Detected   | 1273.6  | Detected   | 988      | Detected   | 1672.6  | Detected   | Agl           | 2.178999479 | 1.28712871 | 1.31328518 | 0.7757538 |
| A_55_P2118 | 23.5    | Detected   | 16.9    | Not Detect | 38.2     | Detected   | 51.2    | Not Detect | Gm7271        | 2.178723404 | 1.62553191 | 3.0295858  | 2.260355  |
| A_55_P2118 | 16.3    | Detected   | 22.1    | Detected   | 27.6     | Detected   | 35.5    | Not Detect | Peg12         | 2.17791411  | 1.69325153 | 1.60633484 | 1.2488688 |
| A_55_P2055 | 54      | Detected   | 126     | Detected   | 141.2    | Detected   | 117.6   | Detected   | Ppara         | 2.177777778 | 2.61481481 | 0.93333333 | 1.1206349 |
| A_55_P2172 | 100.8   | Detected   | 103.2   | Detected   | 172      | Detected   | 219.5   | Detected   | 1700080G18Rik | 2.177579365 | 1.70634921 | 2.12693798 | 1.6666667 |
| A_52_P6479 | 780.8   | Detected   | 734.6   | Detected   | 1195.4   | Detected   | 1700    | Detected   | Usf2          | 2.177254098 | 1.53099385 | 2.31418459 | 1.6272802 |
| A_55_P1962 | 19.3    | Detected   | 26.9    | Detected   | 24.4     | Detected   | 42      | Not Detect | Cxcr6         | 2.176165803 | 1.2642487  | 1.56133829 | 0.9070632 |
| A_55_P2299 | 275.9   | Detected   | 362.1   | Detected   | 657      | Detected   | 600.4   | Detected   | LOC553090     | 2.176150779 | 2.38129757 | 1.6581055  | 1.8144159 |
| A_55_P2025 | 226.7   | Detected   | 336.9   | Detected   | 356      | Detected   | 493.3   | Detected   | Pqlc3         | 2.176003529 | 1.5703573  | 1.46423271 | 1.0566934 |

|            |         |            |         |            |         |            |         |            |               |             |            |            |           |
|------------|---------|------------|---------|------------|---------|------------|---------|------------|---------------|-------------|------------|------------|-----------|
| A_55_P2046 | 11641.9 | Detected   | 19519.2 | Detected   | 14334.8 | Detected   | 25331.8 | Detected   | BC056474      | 2.175916302 | 1.23131104 | 1.29778884 | 0.7343949 |
| A_52_P6717 | 787.9   | Detected   | 1591.3  | Detected   | 1624    | Detected   | 1713.8  | Detected   | Arhgap18      | 2.175149131 | 2.06117528 | 1.07698108 | 1.0205492 |
| A_51_P3855 | 7657.7  | Detected   | 8932.8  | Detected   | 13398.5 | Detected   | 16652.9 | Detected   | Slc37a4       | 2.174660799 | 1.7496768  | 1.8642419  | 1.4999216 |
| A_55_P2010 | 2658.2  | Detected   | 3784    | Detected   | 4394.8  | Detected   | 5778.8  | Detected   | Il11ra1       | 2.173952299 | 1.65329923 | 1.52716702 | 1.1614165 |
| A_52_P5976 | 2389.2  | Detected   | 5807.7  | Detected   | 1429.2  | Detected   | 5193.6  | Detected   | Fzd1          | 2.173782019 | 0.59819186 | 0.89426107 | 0.2460871 |
| A_55_P1953 | 43.8    | Detected   | 50.4    | Detected   | 83.5    | Detected   | 95.2    | Detected   | Efcab3        | 2.173515982 | 1.90639269 | 1.88888889 | 1.656746  |
| A_51_P4924 | 13805.8 | Detected   | 21275.2 | Detected   | 19144.2 | Detected   | 30004.9 | Detected   | Pmvk          | 2.173354677 | 1.38667806 | 1.41032282 | 0.8998364 |
| A_55_P2101 | 376.8   | Detected   | 421.5   | Detected   | 432.1   | Detected   | 818.4   | Detected   | Fgf8          | 2.171974522 | 1.14676221 | 1.94163701 | 1.0251483 |
| A_66_P1070 | 524.6   | Detected   | 1633.5  | Detected   | 1080.7  | Detected   | 1139.4  | Detected   | Prcp          | 2.171940526 | 2.06004575 | 0.69752066 | 0.6615856 |
| A_51_P1557 | 1074.7  | Detected   | 1309.1  | Detected   | 1039.7  | Detected   | 2331.9  | Detected   | Ascc3         | 2.169814832 | 0.96743277 | 1.78130013 | 0.7942098 |
| A_66_P1380 | 2279.3  | Detected   | 3029.3  | Detected   | 3963.1  | Detected   | 4943.5  | Detected   | Atp2b1        | 2.168867635 | 1.73873558 | 1.63189516 | 1.308256  |
| A_52_P1625 | 26.3    | Detected   | 22.7    | Detected   | 21.1    | Detected   | 57      | Detected   | Dph3          | 2.16730038  | 0.80228137 | 2.51101322 | 0.9295154 |
| A_51_P4240 | 1600.4  | Detected   | 2184.4  | Detected   | 2676.4  | Detected   | 3468.5  | Detected   | Btb2          | 2.167270682 | 1.67233192 | 1.58785021 | 1.2252335 |
| A_55_P2312 | 24.6    | Detected   | 26.1    | Detected   | 22.8    | Detected   | 53.3    | Detected   | AU046084      | 2.166666667 | 0.92682927 | 2.04214559 | 0.8735632 |
| A_55_P2157 | 8891.3  | Detected   | 13988.2 | Detected   | 12284.7 | Detected   | 19263.8 | Detected   | Gm2s          | 2.166589813 | 1.38165398 | 1.37714645 | 0.8782188 |
| A_52_P2444 | 88.7    | Detected   | 128.6   | Detected   | 134.4   | Detected   | 192.1   | Detected   | U2surp        | 2.16572717  | 1.51521984 | 1.49377916 | 1.0451011 |
| A_52_P6215 | 962.1   | Detected   | 1491.5  | Detected   | 1786.2  | Detected   | 2083.3  | Detected   | Ifnlr1        | 2.165367425 | 1.85656377 | 1.39678176 | 1.1975863 |
| A_55_P2053 | 6804.2  | Detected   | 14242.9 | Detected   | 15548.2 | Detected   | 14733.5 | Detected   | Foxa1         | 2.165353752 | 2.28508862 | 1.03444523 | 1.0916457 |
| A_55_P2154 | 22.5    | Detected   | 39      | Detected   | 28.6    | Detected   | 48.7    | Detected   | Morn3         | 2.164444444 | 1.27111111 | 1.24871795 | 0.7333333 |
| A_55_P1956 | 17.1    | Detected   | 13      | Not Detect | 411.5   | Detected   | 37      | Not Detect | Ttyh1         | 2.16374269  | 24.0643275 | 2.84615385 | 31.653846 |
| A_52_P1346 | 619.1   | Detected   | 776     | Detected   | 1544.4  | Detected   | 1339.5  | Detected   | Tgoln2        | 2.163624616 | 2.49458892 | 1.72615979 | 1.9902062 |
| A_66_P1163 | 1637.8  | Detected   | 908.7   | Detected   | 6123    | Detected   | 3541.8  | Detected   | Soat2         | 2.162535108 | 3.73855172 | 3.89765599 | 6.7381974 |
| A_51_P3228 | 11.7    | Not Detect | 3.2     | Not Detect | 17.3    | Detected   | 25.3    | Not Detect | 1700054O13Rik | 2.162393162 | 1.47863248 | 7.90625    | 5.40625   |
| A_55_P2067 | 7.4     | Not Detect | 21.5    | Detected   | 5.4     | Not Detect | 16      | Not Detect | Psg27         | 2.162162162 | 0.72972973 | 0.74418605 | 0.2511628 |
| A_55_P2079 | 504.7   | Detected   | 913.8   | Detected   | 147.7   | Detected   | 1090.8  | Detected   | Dnm1          | 2.161283931 | 0.2926491  | 1.19369665 | 0.1616327 |
| A_55_P2056 | 28.6    | Detected   | 21      | Detected   | 27.9    | Detected   | 61.8    | Detected   | Nkx1-1        | 2.160839161 | 0.97552448 | 2.94285714 | 1.3285714 |
| A_55_P2165 | 11529.6 | Detected   | 9549.6  | Detected   | 16282.2 | Detected   | 24911.3 | Detected   | Pcyt1a        | 2.160638704 | 1.41220858 | 2.60862235 | 1.7050138 |
| A_55_P2003 | 665.6   | Detected   | 554.6   | Detected   | 486.1   | Detected   | 1437.5  | Detected   | Setd1b        | 2.159705529 | 0.73031851 | 2.59195817 | 0.8764876 |
| A_55_P1971 | 853.4   | Detected   | 13608.9 | Detected   | 805.3   | Detected   | 1842.4  | Detected   | Urah          | 2.158893836 | 0.94363722 | 0.13538199 | 0.0591745 |
| A_55_P2178 | 17      | Detected   | 23      | Detected   | 3.3     | Not Detect | 36.7    | Not Detect | 3-Sep         | 2.158823529 | 0.19411765 | 1.59565217 | 0.1434783 |
| A_52_P6207 | 1117.6  | Detected   | 2198.8  | Detected   | 1485.6  | Detected   | 2412.7  | Detected   | Ncl           | 2.158822477 | 1.32927702 | 1.09728033 | 0.6756413 |
| A_55_P2143 | 86.4    | Detected   | 364.3   | Detected   | 233.7   | Detected   | 186.5   | Detected   | Pgbd5         | 2.158564815 | 2.70486111 | 0.51194071 | 0.6415043 |
| A_51_P2245 | 13014.2 | Detected   | 23317.1 | Detected   | 15893.8 | Detected   | 28080.5 | Detected   | Gnpat         | 2.157681609 | 1.221266   | 1.20428784 | 0.6816371 |
| A_55_P2031 | 1363.6  | Detected   | 2158.3  | Detected   | 1795.3  | Detected   | 2942.1  | Detected   | Stat5b        | 2.157597536 | 1.31658844 | 1.36315619 | 0.8318121 |
| A_51_P2788 | 4649.2  | Detected   | 6615.1  | Detected   | 6864.2  | Detected   | 10030.4 | Detected   | Hint2         | 2.157446442 | 1.47642605 | 1.51628849 | 1.0376563 |
| A_51_P5036 | 1092.3  | Detected   | 1346.5  | Detected   | 1439.2  | Detected   | 2356.5  | Detected   | Tmem205       | 2.157374348 | 1.31758674 | 1.75009283 | 1.0688452 |
| A_55_P2011 | 181.5   | Detected   | 155.6   | Detected   | 205.8   | Detected   | 391.5   | Detected   | 5031425E22Rik | 2.157024793 | 1.1338843  | 2.51606684 | 1.3226221 |
| A_51_P3159 | 36654.8 | Detected   | 44227.2 | Detected   | 57109.6 | Detected   | 79055   | Detected   | Gadd45g       | 2.156743455 | 1.55803878 | 1.78747468 | 1.2912778 |
| A_55_P1963 | 845.1   | Detected   | 1247.4  | Detected   | 846.8   | Detected   | 1822.2  | Detected   | Aktip         | 2.156194533 | 1.0020116  | 1.46079846 | 0.678852  |
| A_55_P2371 | 23.7    | Detected   | 27.4    | Detected   | 19.8    | Detected   | 51.1    | Detected   | AA419673      | 2.156118143 | 0.83544304 | 1.8649635  | 0.7226277 |

|            |                  |                  |                  |                  |               |             |            |            |           |
|------------|------------------|------------------|------------------|------------------|---------------|-------------|------------|------------|-----------|
| A_55_P2172 | 21.2 Detected    | 25.8 Detected    | 19.4 Detected    | 45.7 Not Detect  | Gm10640       | 2.155660377 | 0.91509434 | 1.77131783 | 0.751938  |
| A_51_P4663 | 5460.9 Detected  | 5732.3 Detected  | 6813.5 Detected  | 11768.1 Detected | Pitpna        | 2.154974455 | 1.24768811 | 2.05294559 | 1.1886154 |
| A_66_P1193 | 7.1 Not Detect   | 6.1 Not Detect   | 40.4 Detected    | 15.3 Not Detect  | Gm382         | 2.154929577 | 5.69014085 | 2.50819672 | 6.6229508 |
| A_52_P5021 | 3.9 Not Detect   | 15 Detected      | 3.7 Not Detect   | 8.4 Not Detect   | Hectd2        | 2.153846154 | 0.94871795 | 0.56       | 0.2466667 |
| A_55_P2072 | 10.4 Not Detect  | 10.9 Not Detect  | 16.7 Detected    | 22.4 Not Detect  |               | 2.153846154 | 1.60576923 | 2.05504587 | 1.5321101 |
| A_52_P2388 | 5.2 Not Detect   | 20.2 Detected    | 7.2 Not Detect   | 11.2 Not Detect  | Shisa9        | 2.153846154 | 1.38461538 | 0.55445545 | 0.3564356 |
| A_51_P1376 | 24.1 Detected    | 108.2 Detected   | 57.4 Detected    | 51.9 Detected    | Fcna          | 2.153526971 | 2.38174274 | 0.47966728 | 0.5304991 |
| A_65_P1210 | 55.5 Detected    | 49.5 Detected    | 56.5 Detected    | 119.5 Detected   | Tmtc1         | 2.153153153 | 1.01801802 | 2.41414141 | 1.1414141 |
| A_55_P1969 | 350.7 Detected   | 455.7 Detected   | 410.1 Detected   | 755.1 Detected   | Prb1          | 2.153122327 | 1.16937553 | 1.65701119 | 0.8999342 |
| A_55_P2058 | 8620.4 Detected  | 11489.8 Detected | 14061.1 Detected | 18555.5 Detected | Hilpda        | 2.152510324 | 1.63114241 | 1.61495413 | 1.2237898 |
| A_66_P1367 | 26.9 Detected    | 31.6 Detected    | 46.3 Detected    | 57.9 Detected    | Mapk15        | 2.152416357 | 1.72118959 | 1.83227848 | 1.4651899 |
| A_55_P2091 | 28.9 Detected    | 34.8 Detected    | 28.3 Detected    | 62.2 Detected    | Col11a2       | 2.152249135 | 0.97923875 | 1.78735632 | 0.8132184 |
| A_52_P2552 | 246.9 Detected   | 276.6 Detected   | 499.3 Detected   | 531.3 Detected   | Rnf103        | 2.151883354 | 2.02227623 | 1.9208243  | 1.8051338 |
| A_51_P2780 | 5634.3 Detected  | 4210.6 Detected  | 5953.6 Detected  | 12114.5 Detected | Ufsp1         | 2.150134001 | 1.05667075 | 2.8771434  | 1.4139553 |
| A_55_P2161 | 24 Detected      | 40.1 Detected    | 25.7 Detected    | 51.6 Detected    | Spata2l       | 2.15        | 1.07083333 | 1.28678304 | 0.6408978 |
| A_51_P2610 | 1277.5 Detected  | 1109.9 Detected  | 1618 Detected    | 2745.2 Detected  | Cpne2         | 2.14888454  | 1.2665362  | 2.47337598 | 1.457789  |
| A_51_P2422 | 5023.8 Detected  | 4956.2 Detected  | 5876.1 Detected  | 10791.2 Detected | Naaa          | 2.148015446 | 1.16965245 | 2.17731326 | 1.1856059 |
| A_55_P2151 | 285.6 Detected   | 232.9 Detected   | 545.9 Detected   | 613.4 Detected   | C8g           | 2.147759104 | 1.91141457 | 2.63374839 | 2.3439244 |
| A_55_P2165 | 138.8 Detected   | 148.8 Detected   | 180.1 Detected   | 298.1 Detected   | Gm5486        | 2.147694524 | 1.29755043 | 2.00336022 | 1.2103495 |
| A_55_P1953 | 6.1 Not Detect   | 8.4 Not Detect   | 55 Detected      | 13.1 Not Detect  | Ace2          | 2.147540984 | 9.01639344 | 1.55952381 | 6.547619  |
| A_55_P1997 | 66.5 Detected    | 67.9 Detected    | 61 Detected      | 142.8 Detected   | Lpar2         | 2.147368421 | 0.91729323 | 2.10309278 | 0.89838   |
| A_55_P2162 | 10.2 Not Detect  | 100.4 Detected   | 3.3 Not Detect   | 21.9 Not Detect  | Tph2          | 2.147058824 | 0.32352941 | 0.21812749 | 0.0328685 |
| A_52_P8178 | 718.2 Detected   | 1235.4 Detected  | 954.4 Detected   | 1541.7 Detected  | Gspt1         | 2.146616541 | 1.32887775 | 1.24793589 | 0.7725433 |
| A_55_P2076 | 3354.5 Detected  | 5405.4 Detected  | 3216 Detected    | 7198.4 Detected  | Mon1b         | 2.145893576 | 0.95871218 | 1.33170533 | 0.5949606 |
| A_66_P1086 | 400.6 Detected   | 450.3 Detected   | 600.2 Detected   | 859.6 Detected   | Gtpbp10       | 2.145781328 | 1.49825262 | 1.90894959 | 1.3328892 |
| A_55_P1979 | 3073.4 Detected  | 4121.7 Detected  | 5091.5 Detected  | 6592.6 Detected  | 9630033F20Rik | 2.145051083 | 1.65663435 | 1.59948565 | 1.2352913 |
| A_55_P1952 | 12.5 Not Detect  | 17.2 Detected    | 6.1 Not Detect   | 26.8 Not Detect  | Ceacam20      | 2.144       | 0.488      | 1.55813953 | 0.3546512 |
| A_55_P2181 | 15.3 Detected    | 6.5 Not Detect   | 3.3 Not Detect   | 32.8 Not Detect  | Olf1270       | 2.14379085  | 0.21568627 | 5.04615385 | 0.5076923 |
| A_55_P1959 | 1046.8 Detected  | 1464.8 Detected  | 1373.4 Detected  | 2242.1 Detected  | D430042O09Rik | 2.141860909 | 1.31199847 | 1.53065265 | 0.9376024 |
| A_51_P3009 | 69.1 Detected    | 104.4 Detected   | 57.4 Detected    | 147.9 Detected   | Tti2          | 2.140376266 | 0.83068017 | 1.41666667 | 0.5498084 |
| A_55_P2015 | 39.4 Detected    | 59.1 Detected    | 50.2 Detected    | 84.3 Detected    | BC048609      | 2.139593909 | 1.27411168 | 1.42639594 | 0.8494078 |
| A_55_P1978 | 15775.6 Detected | 13491.2 Detected | 32388.7 Detected | 33744.5 Detected | Tspan8        | 2.139031162 | 2.05308831 | 2.50122302 | 2.4007279 |
| A_55_P2040 | 14313.2 Detected | 19887.6 Detected | 12032.8 Detected | 30615.1 Detected | Tom1          | 2.138941676 | 0.84067853 | 1.53940646 | 0.6050403 |
| A_51_P1463 | 11879.6 Detected | 21195.9 Detected | 16433.3 Detected | 25403 Detected   | Mvb12a        | 2.138371662 | 1.38332099 | 1.1984865  | 0.7753056 |
| A_51_P3346 | 3283.3 Detected  | 3332.4 Detected  | 2938.3 Detected  | 7019.6 Detected  | Esyt1         | 2.137970944 | 0.89492279 | 2.10646981 | 0.8817369 |
| A_66_P1281 | 429.2 Detected   | 1001.4 Detected  | 787.3 Detected   | 917.5 Detected   | Fzd5          | 2.137698043 | 1.83434296 | 0.9162173  | 0.7861993 |
| A_55_P2039 | 203 Detected     | 160.2 Detected   | 665 Detected     | 433.8 Detected   | Far1          | 2.136945813 | 3.27586207 | 2.70786517 | 4.1510612 |
| A_55_P2012 | 6071.4 Detected  | 9916.1 Detected  | 6648.6 Detected  | 12971.1 Detected | Eps15l1       | 2.136426524 | 1.09506868 | 1.30808483 | 0.6704854 |
| A_55_P2139 | 14731.3 Detected | 13821.6 Detected | 23022.6 Detected | 31471.1 Detected | Rps6ka1       | 2.136342346 | 1.56283559 | 2.27695057 | 1.6656972 |
| A_55_P2046 | 112.4 Detected   | 173.4 Detected   | 154.9 Detected   | 240.1 Detected   | Rps6kl1       | 2.136120996 | 1.37811388 | 1.38465975 | 0.8933103 |

|            |                  |                  |                  |                   |               |                   |            |            |           |
|------------|------------------|------------------|------------------|-------------------|---------------|-------------------|------------|------------|-----------|
| A_51_P4998 | 978.7 Detected   | 1068.5 Detected  | 803.1 Detected   | 2089.3 Detected   | Krit1         | 2.134770614       | 0.82057832 | 1.95535798 | 0.7516144 |
| A_55_P2177 | 91.8 Detected    | 128.7 Detected   | 78.8 Detected    | 195.9 Detected    | Ccdc24        | 2.133986928       | 0.8583878  | 1.52214452 | 0.6122766 |
| A_66_P1269 | 444.7 Detected   | 435.6 Detected   | 407.9 Detected   | 948.2 Detected    | Gm10523       | 2.132223971       | 0.91724758 | 2.17676768 | 0.9364096 |
| A_66_P1396 | 200.5 Detected   | 299.8 Detected   | 573.1 Detected   | 427.4 Detected    | Mppe1         | 2.131670823       | 2.85835411 | 1.42561708 | 1.9116077 |
| A_51_P1202 | 1425.3 Detected  | 2088.5 Detected  | 1578.5 Detected  | 3036.7 Detected   | Fbx18         | 2.130569003       | 1.10748614 | 1.45401006 | 0.7558056 |
| A_55_P2109 | 57.5 Detected    | 62.6 Detected    | 162.4 Detected   | 122.5 Detected    | Adora2a       | 2.130434783       | 2.82434783 | 1.95686901 | 2.5942492 |
| A_52_P1830 | 16783.7 Detected | 18369.5 Detected | 26240.5 Detected | 35754.3 Detected  | Impdh1        | 2.13029904        | 1.56345144 | 1.94639484 | 1.428482  |
| A_55_P2053 | 2548.7 Detected  | 1921.3 Detected  | 8585.9 Detected  | 5428.5 Detected   | Rab17         | 2.129909366       | 3.368737   | 2.8254307  | 4.4687972 |
| A_55_P1955 | 563.5 Detected   | 511.2 Detected   | 489.8 Detected   | 1200.1 Detected   |               | 3-Mar 2.129724933 | 0.86921029 | 2.34761346 | 0.9581377 |
| A_52_P2577 | 7056.7 Detected  | 10792.4 Detected | 8690.4 Detected  | 15025.5 Detected  | Cnnm4         | 2.12925305        | 1.23151048 | 1.39222972 | 0.8052333 |
| A_55_P2063 | 1293 Detected    | 2282.4 Detected  | 2788.7 Detected  | 2753 Detected     | Agk           | 2.129156999       | 2.15676721 | 1.20618647 | 1.2218279 |
| A_52_P3221 | 25.6 Detected    | 88.4 Detected    | 69.9 Detected    | 54.5 Detected     | Ccdc88b       | 2.12890625        | 2.73046875 | 0.61651584 | 0.790724  |
| A_51_P1715 | 3.9 Not Detect   | 2.9 Not Detect   | 16.3 Detected    | 8.3 Not Detect    | Olf487        | 2.128205128       | 4.17948718 | 2.86206897 | 5.6206897 |
| A_55_P2155 | 974.4 Detected   | 1654.7 Detected  | 984.7 Detected   | 2073.5 Detected   | Nlrc3         | 2.12797619        | 1.01057061 | 1.25309724 | 0.5950928 |
| A_55_P1959 | 17.2 Detected    | 26 Detected      | 17.2 Detected    | 36.6 Not Detect   | Wbscr25       | 2.127906977       | 1          | 1.40769231 | 0.6615385 |
| A_55_P2146 | 486.1 Detected   | 611.8 Detected   | 583.8 Detected   | 1034 Detected     | Tmem102       | 2.127134334       | 1.20098745 | 1.6900948  | 0.9542334 |
| A_52_P1262 | 351 Detected     | 500.5 Detected   | 418.1 Detected   | 746 Detected      | Prkab2        | 2.125356125       | 1.19116809 | 1.49050949 | 0.8353646 |
| A_55_P2046 | 1207.9 Detected  | 1605.8 Detected  | 1754 Detected    | 2566.9 Detected   | Ccdc90b       | 2.125093137       | 1.45210696 | 1.59851787 | 1.0922904 |
| A_55_P1983 | 10.5 Not Detect  | 12.4 Not Detect  | 19.1 Detected    | 22.3 Not Detect   | Vps37a        | 2.123809524       | 1.81904762 | 1.7983871  | 1.5403226 |
| A_65_P1039 | 1092.3 Detected  | 1048.5 Detected  | 1098.8 Detected  | 2319.7 Detected   | Gna13         | 2.12368397        | 1.00595075 | 2.21239866 | 1.0479733 |
| A_52_P1019 | 20.4 Detected    | 14.4 Not Detect  | 10.5 Not Detect  | 43.3 Not Detect   | C030014O09Rik | 2.12254902        | 0.51470588 | 3.00694444 | 0.7291667 |
| A_55_P2236 | 16.5 Detected    | 23.8 Detected    | 4.3 Not Detect   | 35 Not Detect     | Tom1          | 2.121212121       | 0.26060606 | 1.47058824 | 0.1806723 |
| A_55_P2206 | 83 Detected      | 129.2 Detected   | 114.3 Detected   | 176 Detected      | A930006K02Rik | 2.120481928       | 1.37710843 | 1.3622291  | 0.8846749 |
| A_55_P2012 | 13018.8 Detected | 18025.6 Detected | 11466.1 Detected | 27606.1 Detected  | Tom1          | 2.120479614       | 0.88073402 | 1.5314941  | 0.6361009 |
| A_51_P1823 | 38.5 Detected    | 47.8 Detected    | 37 Detected      | 81.6 Detected     | Glec2i        | 2.119480519       | 0.96103896 | 1.70711297 | 0.7740586 |
| A_55_P2174 | 26 Detected      | 38.8 Detected    | 32 Detected      | 55.1 Detected     | Ccdc42b       | 2.119230769       | 1.23076923 | 1.42010309 | 0.8247423 |
| A_51_P4182 | 276.9 Detected   | 396 Detected     | 490 Detected     | 586.8 Detected    | Pccb          | 2.119176598       | 1.76959191 | 1.48181818 | 1.2373737 |
| A_51_P1421 | 55.7 Detected    | 70.9 Detected    | 72.6 Detected    | 118 Detected      | Lancl1        | 2.118491921       | 1.30341113 | 1.66431594 | 1.0239774 |
| A_55_P1988 | 315.8 Detected   | 317.3 Detected   | 271.9 Detected   | 669 Detected      | Ins2          | 2.118429386       | 0.86098797 | 2.10841475 | 0.8569177 |
| A_55_P1981 | 540.9 Detected   | 586 Detected     | 1131.4 Detected  | 1145.7 Detected   | Ccdc125       | 2.118136439       | 2.09169902 | 1.95511945 | 1.9307167 |
| A_55_P1959 | 29648.8 Detected | 23755.6 Detected | 61304.7 Detected | 62792.5 Detected  | Hnf4a         | 2.117876609       | 2.06769583 | 2.64327148 | 2.580642  |
| A_55_P2367 | 18.7 Detected    | 59.7 Detected    | 52.7 Detected    | 39.6 Not Detect   | Acer2         | 2.117647059       | 2.81818182 | 0.66331658 | 0.8827471 |
| A_51_P3143 | 57319.9 Detected | 49012 Detected   | 84948.3 Detected | 121381.3 Detected | Crip2         | 2.117611859       | 1.48200363 | 2.47656288 | 1.7332143 |
| A_55_P2085 | 107.2 Detected   | 121.5 Detected   | 256.6 Detected   | 227 Detected      | Ifi2712b      | 2.117537313       | 2.39365672 | 1.86831276 | 2.1119342 |
| A_51_P1953 | 3147.2 Detected  | 3851.2 Detected  | 3551.1 Detected  | 6662.6 Detected   | Baiap211      | 2.116992883       | 1.1283363  | 1.73000623 | 0.9220762 |
| A_55_P2034 | 687.6 Detected   | 690.6 Detected   | 731.8 Detected   | 1455.6 Detected   | Nos3          | 2.116928447       | 1.06428156 | 2.10773241 | 1.0596583 |
| A_51_P4591 | 1360.2 Detected  | 2171.3 Detected  | 2469.4 Detected  | 2879.2 Detected   | Insl6         | 2.116747537       | 1.81546831 | 1.32602588 | 1.137291  |
| A_52_P4410 | 316.2 Detected   | 426.8 Detected   | 409.3 Detected   | 669 Detected      | Rfxap         | 2.115749526       | 1.2944339  | 1.56747891 | 0.9589972 |
| A_55_P2233 | 17.3 Detected    | 10 Not Detect    | 52.7 Detected    | 36.6 Not Detect   | AI662168      | 2.115606936       | 3.04624277 | 3.66       | 5.27      |
| A_55_P2144 | 76.5 Detected    | 67.3 Detected    | 62.5 Detected    | 161.8 Detected    | Gm17776       | 2.11503268        | 0.81699346 | 2.40416048 | 0.9286776 |

|            |                  |                  |                  |                  |               |             |            |            |           |
|------------|------------------|------------------|------------------|------------------|---------------|-------------|------------|------------|-----------|
| A_52_P4954 | 20.1 Detected    | 55.8 Detected    | 35.4 Detected    | 42.5 Not Detect  | Anapc10       | 2.114427861 | 1.76119403 | 0.76164875 | 0.6344086 |
| A_51_P3682 | 14.9 Detected    | 28.5 Detected    | 17.7 Detected    | 31.5 Not Detect  | Phyhip        | 2.11409396  | 1.18791946 | 1.10526316 | 0.6210526 |
| A_55_P2112 | 83 Detected      | 230.7 Detected   | 178 Detected     | 175.4 Detected   | Rwdd3         | 2.113253012 | 2.14457831 | 0.76029476 | 0.7715648 |
| A_55_P2100 | 151.7 Detected   | 103 Detected     | 213.5 Detected   | 320.3 Detected   | Mapt          | 2.111404087 | 1.40738299 | 3.10970874 | 2.0728155 |
| A_55_P2058 | 11068.2 Detected | 10158.8 Detected | 23047.2 Detected | 23365.8 Detected | Pigyl         | 2.111074972 | 2.0822898  | 2.30005512 | 2.2686932 |
| A_55_P2219 | 42.4 Detected    | 60.6 Detected    | 40.4 Detected    | 89.5 Detected    | Wnt5a         | 2.110849057 | 0.95283019 | 1.47689769 | 0.6666667 |
| A_55_P2031 | 93.9 Detected    | 63.7 Detected    | 127.4 Detected   | 198.2 Detected   | Lrrc32        | 2.110756124 | 1.35676251 | 3.11145997 | 2         |
| A_55_P1956 | 29 Detected      | 69.3 Detected    | 80.5 Detected    | 61.2 Detected    | Gm5065        | 2.110344828 | 2.77586207 | 0.88311688 | 1.1616162 |
| A_52_P2707 | 52 Detected      | 75.8 Detected    | 72.7 Detected    | 109.7 Detected   | 0610040B10Rik | 2.109615385 | 1.39807692 | 1.44722955 | 0.9591029 |
| A_55_P2370 | 12.8 Not Detect  | 34.3 Detected    | 27.7 Detected    | 27 Not Detect    | 2810429I04Rik | 2.109375    | 2.1640625  | 0.78717201 | 0.8075802 |
| A_51_P3171 | 626.3 Detected   | 1057.2 Detected  | 1197.1 Detected  | 1321 Detected    | Eepd1         | 2.109212837 | 1.91138432 | 1.24952705 | 1.1323307 |
| A_66_P1094 | 88.9 Detected    | 154.5 Detected   | 157.3 Detected   | 187.5 Detected   | Rtn4ip1       | 2.109111361 | 1.76940382 | 1.21359223 | 1.018123  |
| A_55_P1967 | 421.5 Detected   | 663.6 Detected   | 133.9 Detected   | 888.8 Detected   | Stbd1         | 2.108659549 | 0.31767497 | 1.33936106 | 0.2017782 |
| A_51_P4305 | 5945.7 Detected  | 12091.8 Detected | 9484.5 Detected  | 12535.4 Detected | G6pc3         | 2.108313571 | 1.59518644 | 1.03668602 | 0.7843745 |
| A_51_P4390 | 7769.3 Detected  | 10348.8 Detected | 12133.8 Detected | 16378.9 Detected | Hilpda        | 2.108156462 | 1.56176232 | 1.58268592 | 1.1724838 |
| A_55_P2086 | 513.2 Detected   | 498.3 Detected   | 721.4 Detected   | 1081.9 Detected  | Uevld         | 2.108144973 | 1.40568979 | 2.17118202 | 1.4477223 |
| A_55_P2153 | 1506.2 Detected  | 1117.1 Detected  | 2514.4 Detected  | 3175.2 Detected  | Slc26a6       | 2.108086575 | 1.66936662 | 2.84235968 | 2.250828  |
| A_55_P2079 | 39.9 Detected    | 32.2 Detected    | 18.8 Detected    | 84.1 Detected    | 4930579G24Rik | 2.107769424 | 0.47117794 | 2.61180124 | 0.5838509 |
| A_55_P2177 | 293.7 Detected   | 322.1 Detected   | 1173.2 Detected  | 619 Detected     | Hist2h2be     | 2.107592782 | 3.99455226 | 1.92176343 | 3.6423471 |
| A_55_P2074 | 876 Detected     | 1753.7 Detected  | 960.8 Detected   | 1846 Detected    | Fbxo8         | 2.107305936 | 1.09680365 | 1.05263158 | 0.5478702 |
| A_52_P3118 | 57.9 Detected    | 530.7 Detected   | 3.1 Not Detect   | 122 Detected     | Ddit4l        | 2.107081174 | 0.05354059 | 0.22988506 | 0.0058413 |
| A_52_P1622 | 3505.7 Detected  | 4090.7 Detected  | 5076.8 Detected  | 7384.5 Detected  | Ydjc          | 2.106426677 | 1.44815586 | 1.80519227 | 1.241059  |
| A_52_P1485 | 378.7 Detected   | 306.8 Detected   | 484.8 Detected   | 797.7 Detected   | Hpse          | 2.106416689 | 1.280169   | 2.60006519 | 1.5801825 |
| A_55_P2151 | 5044.5 Detected  | 14279.7 Detected | 8348 Detected    | 10624 Detected   | Klra15        | 2.106056101 | 1.65487164 | 0.74399322 | 0.5846061 |
| A_55_P2454 | 27.5 Detected    | 60.3 Detected    | 27.4 Detected    | 57.9 Detected    | Gmeb1         | 2.105454545 | 0.99636364 | 0.960199   | 0.4543947 |
| A_55_P2132 | 4.8 Not Detect   | 13.5 Not Detect  | 19.9 Detected    | 10.1 Not Detect  | Tekt1         | 2.104166667 | 4.14583333 | 0.74814815 | 1.4740741 |
| A_55_P2110 | 115.3 Detected   | 205.1 Detected   | 177.5 Detected   | 242.6 Detected   | 3830406C13Rik | 2.104076323 | 1.53946227 | 1.18283764 | 0.8654315 |
| A_51_P3000 | 190.5 Detected   | 254.1 Detected   | 282.1 Detected   | 400.8 Detected   | 4933440N22Rik | 2.103937008 | 1.4808399  | 1.57733176 | 1.1101928 |
| A_55_P2170 | 6203.3 Detected  | 17362.1 Detected | 10715.3 Detected | 13048.3 Detected | Klra22        | 2.103444941 | 1.7273548  | 0.75153927 | 0.6171661 |
| A_65_P0232 | 256.5 Detected   | 315.5 Detected   | 9.3 Not Detect   | 539.3 Detected   | Pogk          | 2.102534113 | 0.03625731 | 1.70935024 | 0.029477  |
| A_55_P2099 | 33.3 Detected    | 40.9 Detected    | 33.1 Detected    | 70 Detected      | Gm12633       | 2.102102102 | 0.99399399 | 1.71149144 | 0.809291  |
| A_55_P2001 | 11372.8 Detected | 10507.3 Detected | 13287 Detected   | 23905.1 Detected | Coq2          | 2.101953784 | 1.16831387 | 2.27509446 | 1.2645494 |
| A_55_P2216 | 106.1 Detected   | 113.4 Detected   | 124.7 Detected   | 223 Detected     | 2500002B13Rik | 2.101790763 | 1.17530631 | 1.9664903  | 1.0996473 |
| A_55_P2167 | 18.9 Detected    | 34.9 Detected    | 32 Detected      | 39.7 Not Detect  | Eif5b         | 2.100529101 | 1.69312169 | 1.13753582 | 0.9169054 |
| A_55_P2156 | 140 Detected     | 189.8 Detected   | 205.2 Detected   | 293.9 Detected   | Upk1a         | 2.099285714 | 1.46571429 | 1.54847208 | 1.081138  |
| A_55_P2067 | 464.3 Detected   | 784 Detected     | 671.5 Detected   | 974.2 Detected   | D16Ert472e    | 2.098212363 | 1.44626319 | 1.24260204 | 0.8565051 |
| A_55_P2115 | 14.4 Detected    | 30.2 Detected    | 13.5 Not Detect  | 30.2 Not Detect  | 4632428N05Rik | 2.097222222 | 0.9375     | 1          | 0.4470199 |
| A_55_P2051 | 41.3 Detected    | 32.5 Detected    | 73.8 Detected    | 86.6 Detected    | Ccdc88c       | 2.0968523   | 1.78692494 | 2.66461538 | 2.2707692 |
| A_52_P2279 | 31314.2 Detected | 27179.5 Detected | 61638 Detected   | 65661.1 Detected | Cystm1        | 2.096847437 | 1.96837218 | 2.41583178 | 2.2678121 |
| A_55_P2044 | 111 Detected     | 81.5 Detected    | 85.4 Detected    | 232.7 Detected   | Siah3         | 2.096396396 | 0.76936937 | 2.85521472 | 1.0478528 |



|            |                  |                  |                  |                  |               |             |            |            |           |
|------------|------------------|------------------|------------------|------------------|---------------|-------------|------------|------------|-----------|
| A_55_P2030 | 18.8 Detected    | 15.4 Not Detect  | 24.8 Detected    | 39.4 Not Detect  | 1700110M21Rik | 2.095744681 | 1.31914894 | 2.55844156 | 1.6103896 |
| A_52_P3290 | 3266.2 Detected  | 4077.2 Detected  | 3797.9 Detected  | 6844.5 Detected  | Zzef1         | 2.095554467 | 1.16278856 | 1.6787256  | 0.9314971 |
| A_55_P2022 | 179.4 Detected   | 167.8 Detected   | 243.9 Detected   | 375.9 Detected   | Pira6         | 2.095317726 | 1.35953177 | 2.24016687 | 1.4535161 |
| A_55_P1991 | 50.9 Detected    | 57.9 Detected    | 88.7 Detected    | 106.6 Detected   | BC029214      | 2.094302554 | 1.74263261 | 1.84110535 | 1.5319516 |
| A_55_P2149 | 16 Detected      | 18.4 Detected    | 18.1 Detected    | 33.5 Not Detect  | Fpr-rs6       | 2.09375     | 1.13125    | 1.82065217 | 0.9836957 |
| A_55_P2048 | 69.6 Detected    | 121.2 Detected   | 79.1 Detected    | 145.7 Detected   | Rsph3a        | 2.093390805 | 1.13649425 | 1.20214521 | 0.6526403 |
| A_55_P1963 | 25.7 Detected    | 29.8 Detected    | 24.2 Detected    | 53.8 Detected    | 1810058I24Rik | 2.093385214 | 0.94163424 | 1.80536913 | 0.8120805 |
| A_51_P4019 | 3892.8 Detected  | 4691 Detected    | 5946.8 Detected  | 8145.5 Detected  | Aph1a         | 2.092452733 | 1.52764077 | 1.73641015 | 1.2677041 |
| A_51_P1819 | 334.3 Detected   | 846.4 Detected   | 223 Detected     | 699.5 Detected   | Yjefn3        | 2.092431947 | 0.66706551 | 0.8264414  | 0.2634688 |
| A_55_P1968 | 7075.6 Detected  | 5329.7 Detected  | 11986.8 Detected | 14795.2 Detected | Rhpn2         | 2.091017016 | 1.69410368 | 2.77599114 | 2.2490572 |
| A_66_P1046 | 104.1 Detected   | 154.1 Detected   | 102.9 Detected   | 217.6 Detected   | Ccl25         | 2.090297791 | 0.98847262 | 1.41207008 | 0.6677482 |
| A_55_P2079 | 646.9 Detected   | 790 Detected     | 1294.1 Detected  | 1352 Detected    | Sephs2        | 2.089967537 | 2.00046375 | 1.71139241 | 1.6381013 |
| A_55_P2183 | 15.6 Not Detect  | 52.8 Detected    | 27.7 Detected    | 32.6 Not Detect  | Hist1h1d      | 2.08974359  | 1.77564103 | 0.61742424 | 0.5246212 |
| A_55_P1964 | 1957.9 Detected  | 2823.4 Detected  | 2899.7 Detected  | 4091.3 Detected  | Asah1         | 2.089636856 | 1.48102559 | 1.4490685  | 1.0270242 |
| A_55_P1955 | 23520.8 Detected | 27611.4 Detected | 26572.4 Detected | 49148.7 Detected | Spg7          | 2.089584538 | 1.12974049 | 1.78001478 | 0.9623706 |
| A_55_P2160 | 1265.6 Detected  | 1462.4 Detected  | 2498.9 Detected  | 2644.3 Detected  | Pura          | 2.089364728 | 1.97447851 | 1.80819201 | 1.7087664 |
| A_55_P2128 | 49.4 Detected    | 47.8 Detected    | 56.4 Detected    | 103.2 Detected   | Nmnat3        | 2.089068826 | 1.1417004  | 2.15899582 | 1.1799163 |
| A_55_P2273 | 1167.2 Detected  | 1117.8 Detected  | 2239.9 Detected  | 2437.2 Detected  | A330044H09    | 2.088074023 | 1.91903701 | 2.18035427 | 2.0038468 |
| A_55_P2036 | 34.8 Detected    | 17.9 Not Detect  | 24.6 Detected    | 72.6 Detected    | Magi1         | 2.086206897 | 0.70689655 | 4.05586592 | 1.3743017 |
| A_55_P2170 | 639.7 Detected   | 769.2 Detected   | 1043.9 Detected  | 1334.2 Detected  | Ptgr2         | 2.085665156 | 1.63185868 | 1.73452938 | 1.3571243 |
| A_55_P1971 | 603.8 Detected   | 404.7 Detected   | 523.3 Detected   | 1259.3 Detected  | Acox3         | 2.085624379 | 0.86667771 | 3.11168767 | 1.2930566 |
| A_52_P5170 | 818.5 Detected   | 1304.1 Detected  | 1184.2 Detected  | 1705.8 Detected  | Immpt2l       | 2.0840562   | 1.44679291 | 1.30802853 | 0.9080592 |
| A_55_P2123 | 19.3 Detected    | 24.2 Detected    | 19.1 Detected    | 40.2 Not Detect  | Olfir353      | 2.082901554 | 0.98963731 | 1.66115702 | 0.7892562 |
| A_55_P2157 | 18.2 Detected    | 23.4 Detected    | 15.3 Detected    | 37.9 Not Detect  | Gm17783       | 2.082417582 | 0.84065934 | 1.61965812 | 0.6538462 |
| A_51_P2434 | 25.8 Detected    | 27.1 Detected    | 17.5 Detected    | 53.7 Detected    | Hsd17b1       | 2.081395349 | 0.67829457 | 1.98154982 | 0.6457565 |
| A_52_P5160 | 1081.3 Detected  | 675 Detected     | 1520.9 Detected  | 2250.3 Detected  | Leng9         | 2.081106076 | 1.40654767 | 3.33377778 | 2.2531852 |
| A_52_P2370 | 260.2 Detected   | 1457.8 Detected  | 247.6 Detected   | 541.5 Detected   | Esr1          | 2.081091468 | 0.95157571 | 0.37145013 | 0.169845  |
| A_52_P1478 | 115.4 Detected   | 153.5 Detected   | 170.6 Detected   | 240.1 Detected   | Syne4         | 2.080589255 | 1.47833622 | 1.56416938 | 1.1114007 |
| A_55_P1965 | 25907.3 Detected | 27561.6 Detected | 77133.1 Detected | 53898.6 Detected | Anxa8         | 2.080440648 | 2.97727281 | 1.95556862 | 2.7985712 |
| A_55_P2241 | 292.7 Detected   | 468.1 Detected   | 284.6 Detected   | 608.9 Detected   | Otud7b        | 2.080286983 | 0.97232661 | 1.30079043 | 0.6079897 |
| A_55_P2037 | 4433.3 Detected  | 8668.7 Detected  | 6451.3 Detected  | 9220.6 Detected  | Acsf3         | 2.079850224 | 1.45519139 | 1.06366583 | 0.7442062 |
| A_55_P2073 | 73 Detected      | 103 Detected     | 107.7 Detected   | 151.8 Detected   | Pin1          | 2.079452055 | 1.47534247 | 1.47378641 | 1.0456311 |
| A_55_P2007 | 63.3 Detected    | 60.6 Detected    | 149.9 Detected   | 131.6 Detected   | Sez6l2        | 2.078988942 | 2.36808847 | 2.17161716 | 2.4735974 |
| A_52_P4227 | 679.1 Detected   | 1538.9 Detected  | 744.3 Detected   | 1411.7 Detected  | Lsm6          | 2.078780739 | 1.09600942 | 0.91734356 | 0.4836572 |
| A_55_P1959 | 12.7 Not Detect  | 10.2 Not Detect  | 22.5 Detected    | 26.4 Not Detect  | Gm6899        | 2.078740157 | 1.77165354 | 2.58823529 | 2.2058824 |
| A_55_P2018 | 101.9 Detected   | 134.1 Detected   | 149.3 Detected   | 211.8 Detected   | Vps4b         | 2.078508342 | 1.46516192 | 1.57941834 | 1.1133482 |
| A_55_P1991 | 7836.3 Detected  | 7591.7 Detected  | 10205.9 Detected | 16287.3 Detected | Zscan21       | 2.078442632 | 1.30238761 | 2.1454088  | 1.3443498 |
| A_51_P4309 | 7.7 Not Detect   | 18.5 Detected    | 15.4 Not Detect  | 16 Not Detect    | Gm3643        | 2.077922078 | 2          | 0.86486486 | 0.8324324 |
| A_51_P2902 | 726.9 Detected   | 605 Detected     | 1181.7 Detected  | 1509.6 Detected  | Insig1        | 2.076764342 | 1.62567066 | 2.49520661 | 1.9532231 |
| A_55_P2047 | 9256 Detected    | 16248.8 Detected | 10723.5 Detected | 19216.4 Detected | Clcn3         | 2.076101988 | 1.15854581 | 1.18263503 | 0.6599564 |

|            |                 |                  |                  |                  |               |             |            |            |           |
|------------|-----------------|------------------|------------------|------------------|---------------|-------------|------------|------------|-----------|
| A_55_P2098 | 988.8 Detected  | 1200.5 Detected  | 1534.7 Detected  | 2052 Detected    | Gnpda2        | 2.075242718 | 1.55208333 | 1.7092878  | 1.278384  |
| A_51_P1696 | 8631 Detected   | 16344.8 Detected | 10392.4 Detected | 17910.2 Detected | Bst2          | 2.075101379 | 1.20407832 | 1.09577358 | 0.635823  |
| A_52_P2675 | 187.8 Detected  | 207.2 Detected   | 286.7 Detected   | 389.7 Detected   | Ginm1         | 2.075079872 | 1.52662407 | 1.88079151 | 1.3836873 |
| A_55_P2099 | 150.6 Detected  | 158.4 Detected   | 309.2 Detected   | 312.5 Detected   | Neil1         | 2.075033201 | 2.05312085 | 1.97285354 | 1.9520202 |
| A_55_P2132 | 14.7 Detected   | 10.9 Not Detect  | 29.9 Detected    | 30.5 Not Detect  | Anxa4         | 2.074829932 | 2.03401361 | 2.79816514 | 2.7431193 |
| A_51_P4541 | 60.3 Detected   | 78.2 Detected    | 79.2 Detected    | 125.1 Detected   | Ercc6         | 2.074626866 | 1.31343284 | 1.59974425 | 1.0127877 |
| A_51_P3858 | 20.2 Detected   | 169 Detected     | 11.7 Not Detect  | 41.9 Not Detect  | Cyp4f39       | 2.074257426 | 0.57920792 | 0.24792899 | 0.0692308 |
| A_55_P1956 | 4.1 Not Detect  | 8.5 Not Detect   | 17.7 Detected    | 8.5 Not Detect   | Gm6980        | 2.073170732 | 4.31707317 | 1          | 2.0823529 |
| A_55_P2383 | 37.2 Detected   | 50.5 Detected    | 33.3 Detected    | 77.1 Detected    | C130081A10Rik | 2.072580645 | 0.89516129 | 1.52673267 | 0.6594059 |
| A_51_P3853 | 1291.2 Detected | 687.9 Detected   | 2338 Detected    | 2674.6 Detected  | Slc44a3       | 2.071406444 | 1.81071871 | 3.88806513 | 3.3987498 |
| A_55_P2063 | 20778 Detected  | 21157.2 Detected | 27115.1 Detected | 43026.5 Detected | Krcc1         | 2.07077197  | 1.30499086 | 2.03365757 | 1.2816015 |
| A_55_P2129 | 75.1 Detected   | 169.9 Detected   | 190.8 Detected   | 155.5 Detected   | Foxo3         | 2.07057257  | 2.54061252 | 0.91524426 | 1.1230135 |
| A_55_P2253 | 513.4 Detected  | 992.9 Detected   | 743.9 Detected   | 1063 Detected    | Nip7          | 2.070510323 | 1.44896767 | 1.07060127 | 0.7492195 |
| A_55_P2045 | 6589 Detected   | 8496.6 Detected  | 6922.3 Detected  | 13642 Detected   | Dpy19l1       | 2.070420398 | 1.05058431 | 1.60558341 | 0.8147141 |
| A_66_P1069 | 1822.2 Detected | 1520.5 Detected  | 2151.3 Detected  | 3771.3 Detected  | Gm9926        | 2.069641093 | 1.18060586 | 2.48030253 | 1.4148635 |
| A_52_P4588 | 615.5 Detected  | 813.1 Detected   | 908.2 Detected   | 1273.8 Detected  | Slc25a16      | 2.069536962 | 1.47554833 | 1.56659697 | 1.1169598 |
| A_55_P2107 | 216.4 Detected  | 210.9 Detected   | 242.1 Detected   | 447.8 Detected   | Fam175a       | 2.069316081 | 1.11876155 | 2.12328118 | 1.1479374 |
| A_52_P2606 | 2242.5 Detected | 2409.6 Detected  | 1802 Detected    | 4639.2 Detected  | Cpne3         | 2.068762542 | 0.80356745 | 1.9252988  | 0.747842  |
| A_52_P6539 | 1494.9 Detected | 2832.9 Detected  | 2015.5 Detected  | 3092.2 Detected  | Rpl21         | 2.068499565 | 1.34825072 | 1.09153165 | 0.7114618 |
| A_51_P4285 | 1558 Detected   | 2058.4 Detected  | 2488.9 Detected  | 3222.4 Detected  | Fam134b       | 2.068292683 | 1.59749679 | 1.56548776 | 1.209143  |
| A_55_P2110 | 683.5 Detected  | 1034.4 Detected  | 1400.9 Detected  | 1413.5 Detected  | 2700046G09Rik | 2.068032187 | 2.04959766 | 1.36649265 | 1.3543117 |
| A_55_P1992 | 407 Detected    | 446.5 Detected   | 475.5 Detected   | 841 Detected     | Ubtf          | 2.066339066 | 1.16830467 | 1.88353863 | 1.0649496 |
| A_51_P2661 | 2655.9 Detected | 3072.6 Detected  | 4099.4 Detected  | 5487.4 Detected  | Adpgk         | 2.066116947 | 1.54350691 | 1.78591421 | 1.3341795 |
| A_51_P3923 | 25.9 Detected   | 216.5 Detected   | 55.5 Detected    | 53.5 Detected    | Lrrn3         | 2.065637066 | 2.14285714 | 0.24711316 | 0.256351  |
| A_55_P1988 | 103.7 Detected  | 174.7 Detected   | 100.9 Detected   | 214.2 Detected   | Nek1          | 2.06557377  | 0.97299904 | 1.22610189 | 0.5775615 |
| A_55_P2024 | 2234.9 Detected | 2494.3 Detected  | 3428.7 Detected  | 4616.3 Detected  | Gtpbp10       | 2.065551031 | 1.5341626  | 1.85073969 | 1.3746141 |
| A_55_P2058 | 1426.7 Detected | 2060 Detected    | 2627 Detected    | 2946.6 Detected  | Fanci1        | 2.065325577 | 1.84131212 | 1.43038835 | 1.2752427 |
| A_51_P5201 | 354.9 Detected  | 470.4 Detected   | 447.2 Detected   | 732.9 Detected   | Gm5918        | 2.065088757 | 1.26007326 | 1.55803571 | 0.9506803 |
| A_55_P1979 | 5096.9 Detected | 6843 Detected    | 8465.4 Detected  | 10523.4 Detected | 9630033F20Rik | 2.064666758 | 1.66089191 | 1.53783428 | 1.237089  |
| A_52_P4336 | 412.4 Detected  | 275.8 Detected   | 844.7 Detected   | 851.3 Detected   | Igsf11        | 2.064258002 | 2.04825412 | 3.086657   | 3.0627266 |
| A_52_P8669 | 4579.9 Detected | 10536.1 Detected | 2370.8 Detected  | 9453.4 Detected  | Ifi27         | 2.064106203 | 0.51765322 | 0.89723902 | 0.2250168 |
| A_51_P1604 | 66 Detected     | 102.6 Detected   | 71.4 Detected    | 136.2 Detected   | Lcorl         | 2.063636364 | 1.08181818 | 1.32748538 | 0.6959064 |
| A_55_P2263 | 58.3 Detected   | 125 Detected     | 59.5 Detected    | 120.3 Detected   | A130078K24Rik | 2.063464837 | 1.02058319 | 0.9624     | 0.476     |
| A_52_P4624 | 691 Detected    | 778.3 Detected   | 927.1 Detected   | 1425.7 Detected  | Copg1         | 2.063241679 | 1.34167873 | 1.83181293 | 1.1911859 |
| A_66_P1389 | 443.2 Detected  | 414.3 Detected   | 615.1 Detected   | 914.1 Detected   | Gm9908        | 2.0625      | 1.38786101 | 2.20637219 | 1.4846729 |
| A_51_P1911 | 8.1 Not Detect  | 14.8 Detected    | 6.8 Not Detect   | 16.7 Not Detect  | Rtdr1         | 2.061728395 | 0.83950617 | 1.12837838 | 0.4594595 |
| A_51_P1340 | 9447 Detected   | 10835.1 Detected | 11857.8 Detected | 19469.6 Detected | Stxbp2        | 2.060929396 | 1.25519212 | 1.79690081 | 1.0943877 |
| A_51_P2917 | 69.2 Detected   | 68.3 Detected    | 83.7 Detected    | 142.6 Detected   | Olf1r521      | 2.060693642 | 1.20953757 | 2.08784773 | 1.2254758 |
| A_55_P2194 | 562.2 Detected  | 733.1 Detected   | 441.7 Detected   | 1158.5 Detected  | BC023969      | 2.060654571 | 0.78566346 | 1.58027554 | 0.6025099 |
| A_51_P1942 | 48 Detected     | 84.8 Detected    | 82.3 Detected    | 98.9 Detected    | Stmn4         | 2.060416667 | 1.71458333 | 1.16627358 | 0.9705189 |

|            |                  |                  |                  |                  |               |             |            |            |           |
|------------|------------------|------------------|------------------|------------------|---------------|-------------|------------|------------|-----------|
| A_51_P3023 | 13.6 Not Detect  | 16.9 Detected    | 53.1 Detected    | 28 Not Detect    | Ltb           | 2.058823529 | 3.90441176 | 1.65680473 | 3.1420118 |
| A_52_P2301 | 823.6 Detected   | 610.1 Detected   | 194.9 Detected   | 1695.3 Detected  | Setbp1        | 2.058402137 | 0.236644   | 2.7787248  | 0.3194558 |
| A_55_P2061 | 3347.3 Detected  | 5325.2 Detected  | 3706.9 Detected  | 6889.7 Detected  | Tbc1d2        | 2.058285783 | 1.10742987 | 1.29379178 | 0.6961053 |
| A_52_P4348 | 637.1 Detected   | 751.5 Detected   | 1061.2 Detected  | 1311.1 Detected  | Gnpda2        | 2.057918694 | 1.66567258 | 1.74464405 | 1.4121091 |
| A_55_P2040 | 943.3 Detected   | 1288.4 Detected  | 1392.7 Detected  | 1941 Detected    | Bola1         | 2.057669882 | 1.47641259 | 1.50651971 | 1.0809531 |
| A_51_P5149 | 123.2 Detected   | 124.1 Detected   | 151.8 Detected   | 253.3 Detected   | Rsad1         | 2.056006494 | 1.23214286 | 2.04109589 | 1.2232071 |
| A_66_P1075 | 93.1 Detected    | 80 Detected      | 201.6 Detected   | 191.4 Detected   | Nlrp9c        | 2.055853921 | 2.16541353 | 2.3925     | 2.52      |
| A_55_P2103 | 21.6 Detected    | 29.8 Detected    | 36.1 Detected    | 44.4 Not Detect  | Fam170b       | 2.055555556 | 1.6712963  | 1.48993289 | 1.2114094 |
| A_55_P2019 | 1932.5 Detected  | 2859.6 Detected  | 615.6 Detected   | 3971.7 Detected  | Ndrp4         | 2.055213454 | 0.3185511  | 1.38890055 | 0.2152749 |
| A_55_P2076 | 26993.8 Detected | 40309.8 Detected | 36780.6 Detected | 55477.5 Detected | Pmvk          | 2.055194156 | 1.36255733 | 1.37627823 | 0.9124481 |
| A_55_P2047 | 743.9 Detected   | 1001.7 Detected  | 1353.7 Detected  | 1528.4 Detected  | Rell2         | 2.054577228 | 1.81973384 | 1.52580613 | 1.3514026 |
| A_55_P2132 | 11.2 Not Detect  | 30.4 Detected    | 25.4 Detected    | 23 Not Detect    | Gm550         | 2.053571429 | 2.26785714 | 0.75657895 | 0.8355263 |
| A_52_P1666 | 162.4 Detected   | 170.5 Detected   | 213.4 Detected   | 333.2 Detected   | Vamp1         | 2.051724138 | 1.31403941 | 1.9542522  | 1.2516129 |
| A_55_P2037 | 71.6 Detected    | 70.8 Detected    | 56.4 Detected    | 146.9 Detected   | Esyt1         | 2.051675978 | 0.7877095  | 2.07485876 | 0.7966102 |
| A_52_P1561 | 176.8 Detected   | 174.9 Detected   | 200.8 Detected   | 362.6 Detected   | Grpel1        | 2.050904977 | 1.13574661 | 2.07318468 | 1.1480846 |
| A_55_P1956 | 43.3 Detected    | 53.6 Detected    | 57.8 Detected    | 88.8 Detected    | Cpt1b         | 2.050808314 | 1.33487298 | 1.65671642 | 1.0783582 |
| A_55_P2073 | 16 Detected      | 17.2 Not Detect  | 51.6 Detected    | 32.8 Not Detect  | Daf2          | 2.05        | 3.225      | 1.90697674 | 3         |
| A_66_P1016 | 387.2 Detected   | 661.7 Detected   | 369.1 Detected   | 793.7 Detected   | 4933411K20Rik | 2.049845041 | 0.95325413 | 1.19948617 | 0.5578057 |
| A_51_P1261 | 15917.6 Detected | 19467.9 Detected | 18638.9 Detected | 32627.4 Detected | Map1lc3b      | 2.049768809 | 1.1709617  | 1.67595889 | 0.9574171 |
| A_55_P2083 | 16.7 Detected    | 9.8 Not Detect   | 5.6 Not Detect   | 34.2 Not Detect  | Gm10844       | 2.047904192 | 0.33532934 | 3.48979592 | 0.5714286 |
| A_51_P1033 | 6.4 Not Detect   | 18.7 Detected    | 5.6 Not Detect   | 13.1 Not Detect  | Vwf           | 2.046875    | 0.875      | 0.70053476 | 0.2994652 |
| A_51_P1771 | 124.3 Detected   | 146.5 Detected   | 119.8 Detected   | 254.3 Detected   | Utp18         | 2.045856798 | 0.96379726 | 1.73583618 | 0.8177474 |
| A_55_P2083 | 96.9 Detected    | 87.2 Detected    | 121.1 Detected   | 198.2 Detected   | 1700085B13Rik | 2.045407637 | 1.249742   | 2.27293578 | 1.3887615 |
| A_55_P2079 | 770.2 Detected   | 959.8 Detected   | 521.4 Detected   | 1574.8 Detected  | Cdk6          | 2.044663724 | 0.67696702 | 1.64075849 | 0.5432382 |
| A_51_P3190 | 4.5 Not Detect   | 7.7 Not Detect   | 123.5 Detected   | 9.2 Not Detect   | Cxcr3         | 2.044444444 | 27.4444444 | 1.19480519 | 16.038961 |
| A_55_P2150 | 9 Not Detect     | 657.9 Detected   | 3.5 Not Detect   | 18.4 Not Detect  | Dync1i1       | 2.044444444 | 0.38888889 | 0.02796778 | 0.00532   |
| A_52_P5823 | 1662.6 Detected  | 1717.2 Detected  | 1873.2 Detected  | 3396.7 Detected  | Nub1          | 2.043004932 | 1.12666907 | 1.97804566 | 1.0908456 |
| A_52_P3400 | 1480.7 Detected  | 1818.9 Detected  | 2333.7 Detected  | 3024.6 Detected  | Rundc1        | 2.042682515 | 1.57607888 | 1.66287317 | 1.2830282 |
| A_51_P4275 | 2687.7 Detected  | 3290.5 Detected  | 2672.5 Detected  | 5486.3 Detected  | Pgm1          | 2.041262046 | 0.99434461 | 1.667315   | 0.8121866 |
| A_55_P2126 | 269.9 Detected   | 468.6 Detected   | 348.5 Detected   | 550.9 Detected   | Dhodh         | 2.041126343 | 1.29121897 | 1.17562953 | 0.7437047 |
| A_55_P2017 | 4671.2 Detected  | 2673.2 Detected  | 9186.4 Detected  | 9533.6 Detected  | Igsf9         | 2.040931666 | 1.96660387 | 3.56636241 | 3.4364806 |
| A_51_P3399 | 1298.4 Detected  | 1688.5 Detected  | 2107.4 Detected  | 2648.6 Detected  | Cwf19I2       | 2.039895256 | 1.62307455 | 1.56861119 | 1.24809   |
| A_52_P2147 | 1930 Detected    | 1734.5 Detected  | 3705.5 Detected  | 3934.8 Detected  | Lcor          | 2.038756477 | 1.91994819 | 2.26855001 | 2.1363505 |
| A_51_P3019 | 5850.8 Detected  | 6993.4 Detected  | 12465.6 Detected | 11927.8 Detected | Arl6ip1       | 2.03866138  | 2.13058043 | 1.70557955 | 1.7824806 |
| A_55_P1973 | 34.1 Detected    | 46.4 Detected    | 29.4 Detected    | 69.5 Detected    | Ybx2          | 2.038123167 | 0.86217009 | 1.49784483 | 0.6336207 |
| A_55_P2013 | 1982.9 Detected  | 2764 Detected    | 2954.4 Detected  | 4041.2 Detected  | Esrp2         | 2.038025115 | 1.48993898 | 1.46208394 | 1.0688857 |
| A_55_P2084 | 113.9 Detected   | 110.7 Detected   | 171.3 Detected   | 232.1 Detected   | D830044I16Rik | 2.037752414 | 1.50395083 | 2.09665763 | 1.5474255 |
| A_52_P3509 | 276.1 Detected   | 462.1 Detected   | 266.8 Detected   | 562.6 Detected   | Dennd2c       | 2.037667512 | 0.96631655 | 1.21748539 | 0.5773642 |
| A_52_P4266 | 21.6 Detected    | 24.3 Detected    | 17.3 Not Detect  | 44 Not Detect    | 1700037C18Rik | 2.037037037 | 0.80092593 | 1.81069959 | 0.7119342 |
| A_55_P1972 | 546.7 Detected   | 215.2 Detected   | 241.9 Detected   | 1113.6 Detected  | Celf5         | 2.036948967 | 0.44247302 | 5.17472119 | 1.1240706 |

|            |                  |                  |                  |                  |               |             |            |            |           |
|------------|------------------|------------------|------------------|------------------|---------------|-------------|------------|------------|-----------|
| A_55_P2184 | 62.3 Detected    | 52.4 Detected    | 59.4 Detected    | 126.9 Detected   | Eomes         | 2.036918138 | 0.95345104 | 2.42175573 | 1.1335878 |
| A_55_P1983 | 35.8 Detected    | 813.7 Detected   | 3.6 Not Detect   | 72.9 Detected    | Amy1          | 2.036312849 | 0.10055866 | 0.08959076 | 0.0044242 |
| A_55_P2069 | 3533.3 Detected  | 3022.3 Detected  | 5773.4 Detected  | 7194.6 Detected  | Prr13         | 2.036226757 | 1.63399655 | 2.38050491 | 1.910267  |
| A_52_P2232 | 47.7 Detected    | 79.9 Detected    | 46.4 Detected    | 97.1 Detected    | Hsd17b11      | 2.035639413 | 0.97274633 | 1.21526909 | 0.5807259 |
| A_55_P1973 | 8574 Detected    | 6670.7 Detected  | 14790.3 Detected | 17447.7 Detected | Sema3b        | 2.034954514 | 1.72501749 | 2.61557258 | 2.2172036 |
| A_51_P3190 | 4968.2 Detected  | 6678.7 Detected  | 11538.8 Detected | 10109.9 Detected | Retsat        | 2.034922105 | 2.3225313  | 1.51375268 | 1.7277015 |
| A_55_P1990 | 338.8 Detected   | 466.4 Detected   | 592.7 Detected   | 689.4 Detected   | Ndfip2        | 2.034828808 | 1.74940968 | 1.47813036 | 1.2707976 |
| A_51_P4197 | 103.7 Detected   | 75.5 Detected    | 86.7 Detected    | 211 Detected     | Tha1          | 2.034715526 | 0.83606557 | 2.79470199 | 1.1483444 |
| A_51_P5021 | 40.7 Detected    | 40.1 Detected    | 41.3 Detected    | 82.8 Detected    | Mmp23         | 2.034398034 | 1.01474201 | 2.06483791 | 1.0299252 |
| A_51_P1969 | 4468.6 Detected  | 6724.7 Detected  | 6903.7 Detected  | 9090.7 Detected  | Cx3cl1        | 2.034350803 | 1.54493577 | 1.35183726 | 1.0266183 |
| A_51_P3216 | 11.8 Not Detect  | 25.4 Detected    | 12 Not Detect    | 24 Not Detect    | Ccdc30        | 2.033898305 | 1.01694915 | 0.94488189 | 0.4724409 |
| A_51_P1902 | 8851.6 Detected  | 8807.6 Detected  | 10281.9 Detected | 17994.7 Detected | Scrn1         | 2.032931899 | 1.16158661 | 2.04308779 | 1.1673895 |
| A_55_P2325 | 42.8 Detected    | 45.6 Detected    | 35.3 Detected    | 87 Detected      | 1700060J05Rik | 2.03271028  | 0.82476636 | 1.90789474 | 0.7741228 |
| A_55_P2004 | 8665.3 Detected  | 23176.6 Detected | 14972.8 Detected | 17613.2 Detected | Klra4         | 2.032612835 | 1.72790325 | 0.75995616 | 0.6460309 |
| A_55_P1955 | 259.4 Detected   | 146.4 Detected   | 1478.6 Detected  | 527.1 Detected   | Ctla2a        | 2.031996916 | 5.7000771  | 3.60040984 | 10.099727 |
| A_55_P2104 | 1973.4 Detected  | 1638 Detected    | 2594.1 Detected  | 4009.3 Detected  | Pld1          | 2.031671227 | 1.31453329 | 2.4476801  | 1.5836996 |
| A_51_P1346 | 1076.7 Detected  | 931.8 Detected   | 2286 Detected    | 2186.3 Detected  | Asb13         | 2.03055633  | 2.12315408 | 2.34631895 | 2.4533162 |
| A_55_P2005 | 417.2 Detected   | 646.1 Detected   | 415.4 Detected   | 847.1 Detected   | 3110057O12Rik | 2.030441035 | 0.99568552 | 1.31109735 | 0.6429345 |
| A_66_P1302 | 16080.8 Detected | 14683.8 Detected | 28956.8 Detected | 32647.5 Detected | Slc25a1       | 2.030216158 | 1.80070643 | 2.22336861 | 1.9720236 |
| A_51_P4053 | 20 Detected      | 63.7 Detected    | 44.5 Detected    | 40.6 Not Detect  | Zdhhc15       | 2.03        | 2.225      | 0.63736264 | 0.6985871 |
| A_51_P5147 | 421.9 Detected   | 388.4 Detected   | 84.5 Detected    | 856.2 Detected   | Parp14        | 2.029390851 | 0.20028443 | 2.20442842 | 0.2175592 |
| A_55_P2094 | 239.4 Detected   | 388.6 Detected   | 277.5 Detected   | 485.8 Detected   | Terf2ip       | 2.029239766 | 1.15914787 | 1.25012867 | 0.7141019 |
| A_55_P2099 | 914.4 Detected   | 1092.5 Detected  | 778.2 Detected   | 1855.2 Detected  | Hmx2          | 2.028871391 | 0.85104987 | 1.69812357 | 0.7123112 |
| A_55_P2150 | 53.9 Detected    | 53.8 Detected    | 34.1 Detected    | 109.3 Detected   | Camk2b        | 2.027829314 | 0.63265306 | 2.03159851 | 0.633829  |
| A_51_P4559 | 610.4 Detected   | 906.2 Detected   | 461.7 Detected   | 1237.7 Detected  | Rac3          | 2.027686763 | 0.75638925 | 1.36581329 | 0.5094902 |
| A_55_P1955 | 174.9 Detected   | 825 Detected     | 664.9 Detected   | 354.5 Detected   | Ptpn5         | 2.026872499 | 3.80160091 | 0.42969697 | 0.8059394 |
| A_55_P2044 | 280.4 Detected   | 423.3 Detected   | 296.3 Detected   | 568.1 Detected   | Aoc2          | 2.026034237 | 1.05670471 | 1.34207418 | 0.6999764 |
| A_52_P1675 | 40 Detected      | 147.7 Detected   | 185.5 Detected   | 81 Detected      | Efcab12       | 2.025       | 4.6375     | 0.54840894 | 1.2559242 |
| A_55_P2069 | 12475.6 Detected | 13206.3 Detected | 21818.6 Detected | 25262.8 Detected | Psph          | 2.024976755 | 1.74890186 | 1.91293549 | 1.6521357 |
| A_55_P2101 | 4.1 Not Detect   | 52.8 Detected    | 3 Not Detect     | 8.3 Not Detect   | Kpna7         | 2.024390244 | 0.73170732 | 0.15719697 | 0.0568182 |
| A_55_P2182 | 166.6 Detected   | 286.9 Detected   | 78.8 Detected    | 337.2 Detected   | Arid3a        | 2.024009604 | 0.4729892  | 1.17532241 | 0.2746602 |
| A_55_P2383 | 33.5 Detected    | 37.2 Detected    | 93.2 Detected    | 67.8 Detected    | 6820445E23Rik | 2.023880597 | 2.78208955 | 1.82258065 | 2.5053763 |
| A_51_P4437 | 275.6 Detected   | 370.8 Detected   | 363.9 Detected   | 557.7 Detected   | Hivep2        | 2.023584906 | 1.32039187 | 1.50404531 | 0.9813916 |
| A_55_P2084 | 13.1 Not Detect  | 12.3 Not Detect  | 19.1 Detected    | 26.5 Not Detect  | 9230110K08Rik | 2.022900763 | 1.45801527 | 2.15447154 | 1.5528455 |
| A_55_P2096 | 200.6 Detected   | 268.3 Detected   | 189.4 Detected   | 405.7 Detected   | Tsc22d4       | 2.022432702 | 0.9441675  | 1.51211331 | 0.7059262 |
| A_55_P2140 | 28.2 Detected    | 25.4 Detected    | 30.4 Detected    | 57 Detected      | Entpd7        | 2.021276596 | 1.07801418 | 2.24409449 | 1.1968504 |
| A_55_P2006 | 4.7 Not Detect   | 21.7 Detected    | 6.6 Not Detect   | 9.5 Not Detect   | Fyb           | 2.021276596 | 1.40425532 | 0.43778802 | 0.3041475 |
| A_52_P5133 | 477.9 Detected   | 700 Detected     | 561.8 Detected   | 965.8 Detected   | Phkb          | 2.02092488  | 1.17555974 | 1.37971429 | 0.8025714 |
| A_52_P1434 | 13596.4 Detected | 16121.6 Detected | 29256 Detected   | 27473.3 Detected | Tgoln1        | 2.020630461 | 2.15174605 | 1.70412986 | 1.8147082 |
| A_55_P2186 | 34.1 Detected    | 35.1 Detected    | 30 Detected      | 68.9 Detected    | Phc1          | 2.020527859 | 0.8797654  | 1.96296296 | 0.8547009 |

|            |                  |                  |                  |                  |               |             |            |            |           |
|------------|------------------|------------------|------------------|------------------|---------------|-------------|------------|------------|-----------|
| A_51_P4995 | 2600 Detected    | 4098 Detected    | 2731 Detected    | 5252.7 Detected  | Ankrd10       | 2.020269231 | 1.05038462 | 1.2817716  | 0.6664226 |
| A_55_P2143 | 39.9 Detected    | 150.2 Detected   | 33.5 Detected    | 80.6 Detected    | Slc13a2       | 2.020050125 | 0.839599   | 0.53661784 | 0.223036  |
| A_55_P1983 | 1093 Detected    | 754.5 Detected   | 1685.1 Detected  | 2207.8 Detected  | Sh3d21        | 2.019945105 | 1.54172004 | 2.92617628 | 2.2333996 |
| A_52_P2229 | 576.5 Detected   | 602.6 Detected   | 834.1 Detected   | 1163.7 Detected  | Adck2         | 2.018560278 | 1.44683435 | 1.93113176 | 1.3841686 |
| A_55_P2367 | 33.6 Detected    | 15.2 Not Detect  | 15.5 Not Detect  | 67.8 Detected    | 4933403J19Rik | 2.017857143 | 0.46130952 | 4.46052632 | 1.0197368 |
| A_51_P2208 | 4841.6 Detected  | 4743.3 Detected  | 6943.7 Detected  | 9766.5 Detected  | Chmp2b        | 2.017205056 | 1.43417465 | 2.05900955 | 1.4638964 |
| A_51_P1311 | 106.4 Detected   | 249.4 Detected   | 64.4 Detected    | 214.6 Detected   | Enkur         | 2.016917293 | 0.60526316 | 0.86046512 | 0.2582197 |
| A_51_P4484 | 326.1 Detected   | 423.4 Detected   | 323.3 Detected   | 657.6 Detected   | Nupl2         | 2.016559338 | 0.99141368 | 1.55314124 | 0.7635805 |
| A_51_P2298 | 985.6 Detected   | 1372.7 Detected  | 1122.4 Detected  | 1987.5 Detected  | Fpgt          | 2.016538149 | 1.1387987  | 1.44787645 | 0.8176586 |
| A_55_P1994 | 36844.8 Detected | 54297.2 Detected | 50812.8 Detected | 74298.8 Detected | Xbp1          | 2.016534219 | 1.3791037  | 1.36837259 | 0.9358273 |
| A_51_P1304 | 30.5 Detected    | 22 Detected      | 62.3 Detected    | 61.5 Detected    | C920006O11Rik | 2.016393443 | 2.04262295 | 2.79545455 | 2.8318182 |
| A_52_P7722 | 56.1 Detected    | 77.6 Detected    | 64.5 Detected    | 113.1 Detected   | Rnf212        | 2.016042781 | 1.14973262 | 1.45747423 | 0.8311856 |
| A_51_P2769 | 1471.7 Detected  | 1814.6 Detected  | 1438.8 Detected  | 2966.4 Detected  | Gmip          | 2.015628185 | 0.9776449  | 1.63474044 | 0.792902  |
| A_55_P2003 | 7215.5 Detected  | 13670.3 Detected | 14065.7 Detected | 14540.5 Detected | Gldc          | 2.015175664 | 1.94937288 | 1.06365625 | 1.028924  |
| A_51_P1968 | 3405.8 Detected  | 5456.5 Detected  | 3925.1 Detected  | 6858.6 Detected  | Ist1          | 2.013799988 | 1.15247519 | 1.25695959 | 0.7193439 |
| A_51_P4141 | 2721.2 Detected  | 3598.6 Detected  | 7786 Detected    | 5477 Detected    | Naprt1        | 2.012714979 | 2.86123769 | 1.52198077 | 2.1636192 |
| A_55_P2174 | 6259.2 Detected  | 3483.2 Detected  | 8241.3 Detected  | 12597.6 Detected | Lims2         | 2.012653374 | 1.31666986 | 3.61667432 | 2.366014  |
| A_55_P1983 | 3815.8 Detected  | 5445.7 Detected  | 6601.1 Detected  | 7675.5 Detected  | Plch1         | 2.011504796 | 1.72993868 | 1.40946068 | 1.2121674 |
| A_52_P2532 | 6978.4 Detected  | 22242.4 Detected | 8586.2 Detected  | 14035.2 Detected | Ankrd46       | 2.011234667 | 1.23039665 | 0.63101104 | 0.3860285 |
| A_55_P2047 | 4623.4 Detected  | 7923.3 Detected  | 5478 Detected    | 9295.6 Detected  | Clcn3         | 2.010555003 | 1.18484232 | 1.17319804 | 0.6913786 |
| A_55_P2242 | 19.2 Detected    | 18.7 Detected    | 11 Not Detect    | 38.6 Not Detect  | 4930434J06Rik | 2.010416667 | 0.57291667 | 2.06417112 | 0.5882353 |
| A_51_P1613 | 9.8 Not Detect   | 33 Detected      | 10.7 Not Detect  | 19.7 Not Detect  | 4930448F12Rik | 2.010204082 | 1.09183673 | 0.5969697  | 0.3242424 |
| A_55_P2076 | 39.7 Detected    | 65.8 Detected    | 75.8 Detected    | 79.8 Detected    | Hsd17b13      | 2.010075567 | 1.9093199  | 1.21276596 | 1.1519757 |
| A_55_P2006 | 545.4 Detected   | 434.2 Detected   | 709.5 Detected   | 1096.2 Detected  | Txnip         | 2.00990099  | 1.30088009 | 2.52464302 | 1.6340396 |
| A_52_P4135 | 333.1 Detected   | 356.1 Detected   | 448.7 Detected   | 669.4 Detected   | Nrip1         | 2.009606725 | 1.34704293 | 1.87980904 | 1.2600393 |
| A_66_P1261 | 705.3 Detected   | 1164.3 Detected  | 946.1 Detected   | 1417 Detected    | Ncoa1         | 2.009074153 | 1.341415   | 1.21704028 | 0.8125913 |
| A_52_P4508 | 7296.2 Detected  | 11339.8 Detected | 13004.5 Detected | 14655.5 Detected | Cdpf1         | 2.008648337 | 1.78236616 | 1.29239493 | 1.1468015 |
| A_55_P1991 | 21009.7 Detected | 21545 Detected   | 33933.6 Detected | 42182.7 Detected | S100a13       | 2.0077726   | 1.61513967 | 1.95788814 | 1.5750104 |
| A_51_P3108 | 3923.2 Detected  | 6763.7 Detected  | 5464.7 Detected  | 7876.4 Detected  | Pfkl          | 2.007646819 | 1.39291905 | 1.16451055 | 0.8079454 |
| A_51_P3529 | 11816.2 Detected | 8608.5 Detected  | 18082.5 Detected | 23714.3 Detected | Marcks        | 2.006931162 | 1.53031431 | 2.75475402 | 2.1005402 |
| A_52_P5051 | 121.9 Detected   | 177.3 Detected   | 140.1 Detected   | 244.5 Detected   | Ntn3          | 2.005742412 | 1.14930271 | 1.37901861 | 0.7901861 |
| A_55_P2153 | 19.8 Detected    | 14.5 Not Detect  | 22.4 Detected    | 39.7 Not Detect  | Ppp2r3d       | 2.005050505 | 1.13131313 | 2.73793103 | 1.5448276 |
| A_51_P4456 | 6267.7 Detected  | 7098.7 Detected  | 10190.8 Detected | 12566.1 Detected | 4931406C07Rik | 2.004898129 | 1.62592338 | 1.77019736 | 1.4355868 |
| A_55_P2295 | 24.3 Detected    | 29 Detected      | 22.6 Detected    | 48.7 Not Detect  | A930007D18Rik | 2.004115226 | 0.93004115 | 1.67931034 | 0.7793103 |
| A_55_P2094 | 198.1 Detected   | 106.2 Detected   | 262.7 Detected   | 396.9 Detected   | Phyhd1        | 2.003533569 | 1.32609793 | 3.73728814 | 2.4736347 |
| A_51_P4842 | 1166.6 Detected  | 2459.3 Detected  | 2033.5 Detected  | 2336.9 Detected  | Pcca          | 2.003171161 | 1.74309961 | 0.95022974 | 0.8268613 |
| A_55_P2098 | 37.7 Detected    | 48.2 Detected    | 30.9 Detected    | 75.5 Detected    | Zfp958        | 2.00265252  | 0.81962865 | 1.56639004 | 0.6410788 |
| A_51_P3379 | 3382.1 Detected  | 4058.1 Detected  | 3726.9 Detected  | 6772.9 Detected  | Bmp2k         | 2.002572366 | 1.10194849 | 1.66898302 | 0.9183855 |
| A_66_P1110 | 72.8 Detected    | 165.3 Detected   | 88.3 Detected    | 145.7 Detected   | Trav14d-3-dv8 | 2.001373626 | 1.21291209 | 0.88142771 | 0.5341803 |
| A_51_P5090 | 6819.9 Detected  | 9266.2 Detected  | 9721.6 Detected  | 13646.2 Detected | Asah1         | 2.00093843  | 1.42547545 | 1.47268567 | 1.0491464 |

|            |         |            |         |            |         |            |         |            |               |             |            |            |           |
|------------|---------|------------|---------|------------|---------|------------|---------|------------|---------------|-------------|------------|------------|-----------|
| A_51_P1403 | 10675.8 | Detected   | 16462.7 | Detected   | 13248.2 | Detected   | 21358.4 | Detected   | Cmc2          | 2.000636955 | 1.24095618 | 1.29738135 | 0.8047404 |
| A_55_P1968 | 14.9    | Detected   | 16.4    | Not Detect | 39.4    | Detected   | 29.8    | Not Detect | Cycs          | 2           | 2.6442953  | 1.81707317 | 2.402439  |
| A_51_P1865 | 13.2    | Not Detect | 17.4    | Detected   | 16.8    | Detected   | 26.4    | Not Detect | Theg          | 2           | 1.27272727 | 1.51724138 | 0.9655172 |
| A_66_P1034 | 343.9   | Detected   | 482.1   | Detected   | 472.2   | Detected   | 687.8   | Detected   | Tmc8          | 2           | 1.37307357 | 1.42667496 | 0.9794648 |
| A_55_P2110 | 14      | Not Detect | 19.9    | Detected   | 20.4    | Detected   | 28      | Not Detect | Krtap4-9      | 2           | 1.45714286 | 1.40703518 | 1.0251256 |
| A_52_P1016 | 45.8    | Detected   | 71.2    | Detected   | 123.7   | Detected   | 91.6    | Detected   | Ttc6          | 2           | 2.70087336 | 1.28651685 | 1.7373596 |
| A_55_P1964 | 6.7     | Not Detect | 32.7    | Detected   | 5.3     | Not Detect | 13.4    | Not Detect | 1700015G11Rik | 2           | 0.79104478 | 0.40978593 | 0.1620795 |
| A_66_P1019 | 6       | Not Detect | 32.3    | Detected   | 8.2     | Not Detect | 12      | Not Detect | Lce3b         | 2           | 1.36666667 | 0.37151703 | 0.25387   |
| A_55_P2131 | 4.2     | Not Detect | 26.7    | Detected   | 3.1     | Not Detect | 8.4     | Not Detect | Catsperb      | 2           | 0.73809524 | 0.31460674 | 0.1161049 |
| A_66_P1246 | 5.2     | Not Detect | 38.5    | Detected   | 17.5    | Not Detect | 10.4    | Not Detect | Mark1         | 2           | 3.36538462 | 0.27012987 | 0.4545455 |
| A_55_P2178 | 3978.2  | Detected   | 6230.5  | Detected   | 4257    | Detected   | 7954.1  | Detected   | Gm9199        | 1.999421849 | 1.07008195 | 1.27663911 | 0.6832517 |
| A_51_P2080 | 1792.5  | Detected   | 1515.6  | Detected   | 2186    | Detected   | 3583    | Detected   | Ulk3          | 1.99888424  | 1.2195258  | 2.36408023 | 1.4423331 |
| A_66_P1095 | 358.7   | Detected   | 78.3    | Detected   | 391.5   | Detected   | 716.2   | Detected   | Ehf           | 1.996654586 | 1.09144132 | 9.14687101 | 5         |
| A_55_P1971 | 51.1    | Detected   | 61.5    | Detected   | 66.7    | Detected   | 102     | Detected   | Paqr6         | 1.996086106 | 1.30528376 | 1.65853659 | 1.0845528 |
| A_55_P1970 | 645.2   | Detected   | 801     | Detected   | 1077.9  | Detected   | 1287.8  | Detected   | Ttc38         | 1.995970242 | 1.67064476 | 1.60774032 | 1.3456929 |
| A_55_P2045 | 2461    | Detected   | 2760    | Detected   | 3242.9  | Detected   | 4912    | Detected   | G630025P09Rik | 1.995936611 | 1.31771638 | 1.77971014 | 1.1749638 |
| A_52_P6019 | 316.6   | Detected   | 460.1   | Detected   | 297.7   | Detected   | 631.9   | Detected   | Kdm5b         | 1.995893872 | 0.94030322 | 1.37339709 | 0.6470333 |
| A_51_P1098 | 4872.1  | Detected   | 3429.5  | Detected   | 6415.8  | Detected   | 9723.2  | Detected   | Coro1b        | 1.995689744 | 1.31684489 | 2.83516548 | 1.8707683 |
| A_52_P9722 | 273.1   | Detected   | 370     | Detected   | 404.3   | Detected   | 544.9   | Detected   | Bidc1         | 1.995239839 | 1.48041011 | 1.4727027  | 1.0927027 |
| A_55_P2056 | 61.5    | Detected   | 42      | Detected   | 134.8   | Detected   | 122.7   | Detected   | Zfp114        | 1.995121951 | 2.19186992 | 2.92142857 | 3.2095238 |
| A_55_P2125 | 132     | Detected   | 106.4   | Detected   | 126.5   | Detected   | 263.3   | Detected   | Fam71f2       | 1.99469697  | 0.95833333 | 2.47462406 | 1.1889098 |
| A_52_P5818 | 2753.6  | Detected   | 3589.7  | Detected   | 5826.7  | Detected   | 5490.2  | Detected   | Suclg2        | 1.993826264 | 2.11602992 | 1.52943143 | 1.6231719 |
| A_55_P2031 | 2957.9  | Detected   | 4462.7  | Detected   | 3793.9  | Detected   | 5894.7  | Detected   | Stat5b        | 1.992866561 | 1.28263295 | 1.32088198 | 0.8501356 |
| A_52_P4069 | 388.4   | Detected   | 418     | Detected   | 505.3   | Detected   | 774     | Detected   | Sepsecs       | 1.992790937 | 1.30097837 | 1.85167464 | 1.2088517 |
| A_55_P1954 | 39.4    | Detected   | 38.3    | Detected   | 38.5    | Detected   | 78.5    | Detected   | Myh14         | 1.992385787 | 0.97715736 | 2.04960836 | 1.0052219 |
| A_51_P3884 | 4949.4  | Detected   | 3511.9  | Detected   | 9727.9  | Detected   | 9860.7  | Detected   | Efnb1         | 1.992302097 | 1.96547056 | 2.80779635 | 2.7699821 |
| A_55_P1957 | 918.7   | Detected   | 1277.8  | Detected   | 754     | Detected   | 1830.3  | Detected   | Fam53b        | 1.992271688 | 0.82072494 | 1.43238378 | 0.5900767 |
| A_55_P2009 | 25.5    | Detected   | 54.4    | Detected   | 22.5    | Detected   | 50.8    | Not Detect | Prrg1         | 1.992156863 | 0.88235294 | 0.93382353 | 0.4136029 |
| A_51_P2180 | 47.6    | Detected   | 63.9    | Detected   | 56.1    | Detected   | 94.8    | Detected   | Tatdn1        | 1.991596639 | 1.17857143 | 1.48356808 | 0.8779343 |
| A_55_P2080 | 91.5    | Detected   | 78.7    | Detected   | 48      | Detected   | 182.2   | Detected   | LOC101055828  | 1.991256831 | 0.52459016 | 2.31512071 | 0.6099111 |
| A_66_P1398 | 5126.1  | Detected   | 5557.5  | Detected   | 9316.8  | Detected   | 10203.7 | Detected   | Psph          | 1.990538616 | 1.81752209 | 1.83602339 | 1.6764372 |
| A_51_P2697 | 254.1   | Detected   | 441     | Detected   | 463.2   | Detected   | 505.7   | Detected   | Rad51b        | 1.990161354 | 1.82290437 | 1.14671202 | 1.0503401 |
| A_55_P2008 | 40.1    | Detected   | 59.9    | Detected   | 55.4    | Detected   | 79.8    | Detected   | Ydjc          | 1.990024938 | 1.38154613 | 1.33222037 | 0.9248748 |
| A_55_P2106 | 5397    | Detected   | 7194.4  | Detected   | 6068.5  | Detected   | 10732   | Detected   | Arfgap3       | 1.988512136 | 1.12442097 | 1.49171578 | 0.8435033 |
| A_52_P3052 | 337.9   | Detected   | 344.2   | Detected   | 544.5   | Detected   | 671.8   | Detected   | Spata13       | 1.988162178 | 1.6114235  | 1.95177223 | 1.5819291 |
| A_52_P4295 | 359.1   | Detected   | 1126.9  | Detected   | 326.7   | Detected   | 713.9   | Detected   | Elavl1        | 1.98802562  | 0.90977444 | 0.63350785 | 0.2899104 |
| A_51_P3141 | 5292.9  | Detected   | 9210.1  | Detected   | 5914.2  | Detected   | 10522.2 | Detected   | Nr2c2ap       | 1.987983903 | 1.11738366 | 1.14246317 | 0.6421429 |
| A_51_P2924 | 218     | Detected   | 238.6   | Detected   | 173.8   | Detected   | 433.3   | Detected   | Klhl36        | 1.987614679 | 0.79724771 | 1.81601006 | 0.7284158 |
| A_55_P1962 | 11542.3 | Detected   | 9415.3  | Detected   | 15115   | Detected   | 22936.4 | Detected   | Plac8         | 1.987160271 | 1.30953103 | 2.43607745 | 1.6053657 |
| A_55_P2068 | 38.2    | Detected   | 30.5    | Detected   | 39.1    | Detected   | 75.9    | Detected   | Gm10827       | 1.986910995 | 1.02356021 | 2.48852459 | 1.2819672 |

|            |         |            |         |            |         |            |         |            |               |             |            |            |           |
|------------|---------|------------|---------|------------|---------|------------|---------|------------|---------------|-------------|------------|------------|-----------|
| A_55_P2286 | 241     | Detected   | 698.6   | Detected   | 367.4   | Detected   | 478.7   | Detected   | A930001C03Rik | 1.986307054 | 1.52448133 | 0.6852276  | 0.525909  |
| A_52_P5724 | 10598.7 | Detected   | 13701.7 | Detected   | 14544.4 | Detected   | 21052.1 | Detected   | Agpat5        | 1.986290772 | 1.37228151 | 1.53645898 | 1.0615033 |
| A_52_P3374 | 171.6   | Detected   | 161.9   | Detected   | 259     | Detected   | 340.8   | Detected   | Izumo4        | 1.986013986 | 1.50932401 | 2.10500309 | 1.5997529 |
| A_55_P2137 | 55.8    | Detected   | 55.9    | Detected   | 77      | Detected   | 110.8   | Detected   | Nphp3         | 1.985663082 | 1.37992832 | 1.98211091 | 1.3774597 |
| A_55_P1989 | 9037.9  | Detected   | 655.9   | Detected   | 22401.6 | Detected   | 17942.6 | Detected   | Slco2a1       | 1.985262063 | 2.47862889 | 27.3556945 | 34.153987 |
| A_55_P2112 | 60.4    | Detected   | 56.5    | Detected   | 88.7    | Detected   | 119.9   | Detected   | Cep110        | 1.985099338 | 1.46854305 | 2.12212389 | 1.5699115 |
| A_55_P2038 | 42.4    | Detected   | 50.6    | Detected   | 46.4    | Detected   | 84.1    | Detected   | Trpm8         | 1.983490566 | 1.09433962 | 1.66205534 | 0.916996  |
| A_52_P2354 | 1493.2  | Detected   | 2822.9  | Detected   | 1634.6  | Detected   | 2961.1  | Detected   | Usp38         | 1.983056523 | 1.09469595 | 1.04895675 | 0.5790499 |
| A_55_P2362 | 35.1    | Detected   | 80.6    | Detected   | 69.1    | Detected   | 69.6    | Detected   | E130112N10Rik | 1.982905983 | 1.96866097 | 0.86352357 | 0.8573201 |
| A_55_P1998 | 328.3   | Detected   | 912.5   | Detected   | 528.6   | Detected   | 650.9   | Detected   | Klra33        | 1.982637831 | 1.6101127  | 0.71331507 | 0.5792877 |
| A_55_P2001 | 70.9    | Detected   | 72.6    | Detected   | 85      | Detected   | 140.5   | Detected   | Pdlim5        | 1.981664316 | 1.19887165 | 1.93526171 | 1.1707989 |
| A_51_P4909 | 179.7   | Detected   | 135.4   | Detected   | 210.7   | Detected   | 356.1   | Detected   | Zfp784        | 1.98163606  | 1.17250974 | 2.62998523 | 1.55613   |
| A_51_P4353 | 54.2    | Detected   | 34.6    | Detected   | 46.7    | Detected   | 107.4   | Detected   | Lipe          | 1.981549815 | 0.86162362 | 3.10404624 | 1.349711  |
| A_51_P4084 | 5.4     | Not Detect | 74      | Detected   | 3.8     | Not Detect | 10.7    | Not Detect | Col24a1       | 1.981481481 | 0.7037037  | 0.14459459 | 0.0513514 |
| A_55_P2078 | 26.3    | Detected   | 32.4    | Detected   | 31.3    | Detected   | 52.1    | Detected   | Gm13011       | 1.980988593 | 1.19011407 | 1.60802469 | 0.9660494 |
| A_55_P1960 | 47.2    | Detected   | 38.4    | Detected   | 40.7    | Detected   | 93.5    | Detected   | Styx11        | 1.980932203 | 0.86228814 | 2.43489583 | 1.0598958 |
| A_55_P2096 | 5.2     | Not Detect | 10.1    | Not Detect | 25.8    | Detected   | 10.3    | Not Detect | Sftpb         | 1.980769231 | 4.96153846 | 1.01980198 | 2.5544554 |
| A_52_P4848 | 1157.1  | Detected   | 1638.9  | Detected   | 2043.5  | Detected   | 2291.4  | Detected   | Rfxank        | 1.980295567 | 1.76605306 | 1.39813289 | 1.2468729 |
| A_66_P1275 | 10.1    | Not Detect | 20.5    | Detected   | 12.7    | Not Detect | 20      | Not Detect | Ifna12        | 1.98019802  | 1.25742574 | 0.97560976 | 0.6195122 |
| A_55_P1961 | 1102.8  | Detected   | 1118.7  | Detected   | 968.4   | Detected   | 2183.7  | Detected   | Akt3          | 1.980141458 | 0.8781284  | 1.95199785 | 0.8656476 |
| A_55_P1962 | 209.7   | Detected   | 192.6   | Detected   | 194.6   | Detected   | 415.2   | Detected   | Exoc3l2       | 1.979971388 | 0.92799237 | 2.15576324 | 1.0103842 |
| A_52_P4800 | 15778.3 | Detected   | 13721.5 | Detected   | 18659.8 | Detected   | 31231.8 | Detected   | Tmem134       | 1.979414766 | 1.18262424 | 2.27612142 | 1.3598951 |
| A_55_P2183 | 4875.7  | Detected   | 7623    | Detected   | 5183.1  | Detected   | 9650.9  | Detected   | Tbc1d2        | 1.979387575 | 1.06304736 | 1.26602388 | 0.6799292 |
| A_51_P2903 | 14.3    | Not Detect | 21.4    | Detected   | 14.8    | Not Detect | 28.3    | Not Detect | Sval1         | 1.979020979 | 1.03496503 | 1.32242991 | 0.6915888 |
| A_55_P2081 | 4735.7  | Detected   | 3674.9  | Detected   | 8727.7  | Detected   | 9371.8  | Detected   | Slc2a8        | 1.978968262 | 1.8429588  | 2.55021905 | 2.374949  |
| A_52_P1174 | 2312.7  | Detected   | 4839.3  | Detected   | 1901.9  | Detected   | 4576.1  | Detected   | Tacc1         | 1.978682925 | 0.82237212 | 0.94561197 | 0.3930114 |
| A_51_P2599 | 23820.8 | Detected   | 31647.2 | Detected   | 36238.4 | Detected   | 47131   | Detected   | Arl6ip5       | 1.978564952 | 1.52129232 | 1.48926287 | 1.1450744 |
| A_55_P2066 | 745.9   | Detected   | 1958.8  | Detected   | 1589.4  | Detected   | 1475.7  | Detected   | Slc39a8       | 1.978415337 | 2.13084864 | 0.75336941 | 0.8114152 |
| A_51_P2373 | 4164.5  | Detected   | 625     | Detected   | 7361.4  | Detected   | 8238.7  | Detected   | Rnase4        | 1.978316725 | 1.76765518 | 13.18192   | 11.77824  |
| A_55_P2042 | 72.6    | Detected   | 99.3    | Detected   | 164.2   | Detected   | 143.6   | Detected   | Srgap1        | 1.977961433 | 2.26170799 | 1.44612286 | 1.653575  |
| A_55_P2358 | 6813.7  | Detected   | 6397.8  | Detected   | 3624.3  | Detected   | 13472.9 | Detected   | Trim56        | 1.977325095 | 0.53191364 | 2.10586452 | 0.5664916 |
| A_55_P1965 | 728.3   | Detected   | 1154.4  | Detected   | 1189    | Detected   | 1440    | Detected   | Mtmr14        | 1.977207195 | 1.632569   | 1.24740125 | 1.0299723 |
| A_55_P2285 | 547.3   | Detected   | 435.6   | Detected   | 672     | Detected   | 1081.8  | Detected   | A630038E17Rik | 1.976612461 | 1.22784579 | 2.48347107 | 1.5426997 |
| A_55_P2037 | 534.1   | Detected   | 469.9   | Detected   | 907.1   | Detected   | 1055.7  | Detected   | BC040756      | 1.976596143 | 1.69837109 | 2.24664822 | 1.9304107 |
| A_55_P2125 | 12.5    | Not Detect | 18.6    | Detected   | 18.2    | Detected   | 24.7    | Not Detect | Rab11fip4os1  | 1.976       | 1.456      | 1.32795699 | 0.9784946 |
| A_51_P4820 | 10326.7 | Detected   | 14330.2 | Detected   | 8987.5  | Detected   | 20403.2 | Detected   | Mcoln1        | 1.975771544 | 0.87031675 | 1.42379032 | 0.627172  |
| A_51_P4131 | 3671.9  | Detected   | 2562.8  | Detected   | 3696.4  | Detected   | 7254.5  | Detected   | Ppm1l         | 1.975680166 | 1.00667229 | 2.83069299 | 1.4423287 |
| A_52_P1200 | 564.1   | Detected   | 883.9   | Detected   | 596.3   | Detected   | 1114    | Detected   | Erp44         | 1.974827158 | 1.05708208 | 1.26032357 | 0.6746238 |
| A_55_P2335 | 92.7    | Detected   | 424.2   | Detected   | 625.5   | Detected   | 183     | Detected   | D630045M09Rik | 1.974110032 | 6.74757282 | 0.43140028 | 1.4745403 |
| A_55_P2105 | 198.7   | Detected   | 441.3   | Detected   | 275     | Detected   | 392.1   | Detected   | Ccr10         | 1.973326623 | 1.38399597 | 0.88851122 | 0.6231588 |

|            |         |            |         |            |         |            |         |            |               |             |            |            |           |
|------------|---------|------------|---------|------------|---------|------------|---------|------------|---------------|-------------|------------|------------|-----------|
| A_55_P2056 | 19877.2 | Detected   | 29260.7 | Detected   | 38520.7 | Detected   | 39220.9 | Detected   | Sf3b5         | 1.973160204 | 1.93793391 | 1.34039514 | 1.3164654 |
| A_51_P4325 | 433.2   | Detected   | 678.7   | Detected   | 532.5   | Detected   | 854.7   | Detected   | Lace1         | 1.97299169  | 1.22922438 | 1.25931929 | 0.7845882 |
| A_55_P2327 | 1655    | Detected   | 2298.8  | Detected   | 1326    | Detected   | 3264.8  | Detected   | Exoc8         | 1.972688822 | 0.80120846 | 1.42021924 | 0.5768227 |
| A_55_P2004 | 1568.3  | Detected   | 4078.6  | Detected   | 2536.2  | Detected   | 3093.4  | Detected   | Klra7         | 1.97245425  | 1.61716508 | 0.75844653 | 0.621831  |
| A_55_P2057 | 1344.1  | Detected   | 2418.7  | Detected   | 1623.6  | Detected   | 2650.9  | Detected   | Mall          | 1.972249089 | 1.20794584 | 1.09600198 | 0.6712697 |
| A_52_P4816 | 4282.2  | Detected   | 3733.9  | Detected   | 20736.8 | Detected   | 8444.7  | Detected   | Wtip          | 1.972047079 | 4.84255756 | 2.26162993 | 5.553657  |
| A_52_P9988 | 495     | Detected   | 667.6   | Detected   | 489.5   | Detected   | 975.4   | Detected   | Cxcl16        | 1.970505051 | 0.98888889 | 1.46105452 | 0.7332235 |
| A_55_P1973 | 11983.1 | Detected   | 15979.9 | Detected   | 16981.6 | Detected   | 23612.4 | Detected   | Etfdh         | 1.970475086 | 1.41712912 | 1.47763127 | 1.062685  |
| A_55_P2323 | 16.9    | Detected   | 22.2    | Detected   | 22.6    | Detected   | 33.3    | Not Detect | AA960618      | 1.970414201 | 1.33727811 | 1.5        | 1.018018  |
| A_52_P5768 | 181.4   | Detected   | 381.1   | Detected   | 247.1   | Detected   | 357.4   | Detected   | Cep44         | 1.970231533 | 1.36218302 | 0.9378116  | 0.6483863 |
| A_55_P2274 | 26.8    | Detected   | 32.3    | Detected   | 31.9    | Detected   | 52.8    | Detected   | 9030625N01Rik | 1.970149254 | 1.19029851 | 1.63467492 | 0.9876161 |
| A_55_P2018 | 3130.5  | Detected   | 4664.2  | Detected   | 3470.7  | Detected   | 6166.3  | Detected   | Kxd1          | 1.969749241 | 1.10867274 | 1.3220488  | 0.7441147 |
| A_52_P5903 | 193.8   | Detected   | 686.7   | Detected   | 499.7   | Detected   | 381.7   | Detected   | Sort1         | 1.969556244 | 2.57843137 | 0.5558468  | 0.7276831 |
| A_55_P2152 | 25.9    | Detected   | 18.3    | Detected   | 196.1   | Detected   | 51      | Detected   | Gapdhs        | 1.969111969 | 7.57142857 | 2.78688525 | 10.715847 |
| A_55_P2100 | 2158.3  | Detected   | 3165.3  | Detected   | 2574.6  | Detected   | 4249.9  | Detected   | Arnt          | 1.969096048 | 1.19288329 | 1.34265315 | 0.8133826 |
| A_55_P2026 | 6.4     | Not Detect | 5.3     | Not Detect | 26.4    | Detected   | 12.6    | Not Detect | Stab2         | 1.96875     | 4.125      | 2.37735849 | 4.9811321 |
| A_52_P1725 | 311.8   | Detected   | 391.8   | Detected   | 446.9   | Detected   | 613.8   | Detected   | Dffa          | 1.968569596 | 1.43329057 | 1.56661562 | 1.140633  |
| A_51_P4881 | 3821.7  | Detected   | 3673.8  | Detected   | 2436.3  | Detected   | 7523.2  | Detected   | Bmper         | 1.968548028 | 0.63749117 | 2.04779792 | 0.6631553 |
| A_55_P1955 | 28051.9 | Detected   | 36609   | Detected   | 23679.7 | Detected   | 55207.9 | Detected   | Fam65a        | 1.968062769 | 0.8441389  | 1.50804174 | 0.6468273 |
| A_52_P4084 | 210.7   | Detected   | 244.7   | Detected   | 298.9   | Detected   | 414.6   | Detected   | Arpp19        | 1.967726626 | 1.41860465 | 1.69431957 | 1.2214957 |
| A_55_P1982 | 6950.7  | Detected   | 7702.2  | Detected   | 11807.3 | Detected   | 13671.9 | Detected   | Hsd3b7        | 1.966981743 | 1.69872099 | 1.77506427 | 1.5329776 |
| A_55_P2398 | 17.8    | Detected   | 15.1    | Not Detect | 11.1    | Not Detect | 35      | Not Detect | B130024M06Rik | 1.966292135 | 0.62359551 | 2.31788079 | 0.7350993 |
| A_52_P6216 | 562.7   | Detected   | 1024    | Detected   | 964.9   | Detected   | 1106.1  | Detected   | Dnajb4        | 1.965701084 | 1.71476808 | 1.08017578 | 0.9422852 |
| A_55_P1993 | 145.4   | Detected   | 133.1   | Detected   | 221.3   | Detected   | 285.8   | Detected   | Hemk1         | 1.965612105 | 1.52200825 | 2.1472577  | 1.6626597 |
| A_55_P2036 | 287     | Detected   | 241.9   | Detected   | 428.7   | Detected   | 564.1   | Detected   | Slc26a6       | 1.965505226 | 1.49372822 | 2.33195535 | 1.7722199 |
| A_55_P1952 | 667     | Detected   | 1014.2  | Detected   | 712.7   | Detected   | 1310.6  | Detected   | Fis1          | 1.964917541 | 1.06851574 | 1.29225005 | 0.7027214 |
| A_55_P2015 | 150.7   | Detected   | 171.1   | Detected   | 109.1   | Detected   | 296.1   | Detected   | Wwox          | 1.96483079  | 0.72395488 | 1.73056692 | 0.6376388 |
| A_55_P2009 | 31655.2 | Detected   | 58962.6 | Detected   | 47844.9 | Detected   | 62172.3 | Detected   | Cdk18         | 1.964046981 | 1.51143888 | 1.0544362  | 0.8114449 |
| A_52_P2976 | 2929.4  | Detected   | 3321.7  | Detected   | 4981.5  | Detected   | 5751    | Detected   | Pdia5         | 1.963200655 | 1.70051888 | 1.73134238 | 1.4996839 |
| A_55_P1958 | 18.8    | Detected   | 31.3    | Detected   | 19.2    | Detected   | 36.9    | Not Detect | 4833422C13Rik | 1.962765957 | 1.0212766  | 1.17891374 | 0.6134185 |
| A_51_P1676 | 13.4    | Not Detect | 17.6    | Detected   | 6.1     | Not Detect | 26.3    | Not Detect | 2610204G22Rik | 1.962686567 | 0.45522388 | 1.49431818 | 0.3465909 |
| A_51_P1527 | 1995    | Detected   | 2147.2  | Detected   | 2561.3  | Detected   | 3915    | Detected   | Nrip1         | 1.962406015 | 1.28385965 | 1.82330477 | 1.1928558 |
| A_66_P1068 | 36.3    | Detected   | 44.9    | Detected   | 43.2    | Detected   | 71.2    | Detected   | Kmo           | 1.961432507 | 1.19008264 | 1.5857461  | 0.9621381 |
| A_52_P1531 | 7706.3  | Detected   | 9647.2  | Detected   | 11277.1 | Detected   | 15110.2 | Detected   | Arl2bp        | 1.960759379 | 1.46336115 | 1.5662783  | 1.1689506 |
| A_55_P1958 | 1200.4  | Detected   | 1802.3  | Detected   | 1601.3  | Detected   | 2353.2  | Detected   | Imm2p2l       | 1.960346551 | 1.33397201 | 1.30566498 | 0.8884758 |
| A_55_P2160 | 34521.3 | Detected   | 31864.3 | Detected   | 46691   | Detected   | 67671.5 | Detected   | Tsc22d1       | 1.960282492 | 1.35252728 | 2.12374036 | 1.4653076 |
| A_52_P5474 | 5398.5  | Detected   | 4701.6  | Detected   | 7618.8  | Detected   | 10580.9 | Detected   | Sirt2         | 1.959970362 | 1.41128091 | 2.2504892  | 1.6204696 |
| A_51_P1527 | 119.8   | Detected   | 307.5   | Detected   | 156.6   | Detected   | 234.8   | Detected   | 2810039B14Rik | 1.959933222 | 1.30717863 | 0.76357724 | 0.5092683 |
| A_51_P4854 | 456.7   | Detected   | 2395.7  | Detected   | 393.7   | Detected   | 895.1   | Detected   | Gtsf1         | 1.959929932 | 0.86205386 | 0.37362775 | 0.1643361 |
| A_55_P2167 | 17840.2 | Detected   | 23065.7 | Detected   | 24445   | Detected   | 34960.2 | Detected   | Ldlr          | 1.959630497 | 1.37022006 | 1.51567913 | 1.0597987 |



|            |         |          |         |            |         |            |         |            |               |             |            |            |           |
|------------|---------|----------|---------|------------|---------|------------|---------|------------|---------------|-------------|------------|------------|-----------|
| A_55_P2017 | 318.6   | Detected | 442.5   | Detected   | 293.8   | Detected   | 624.2   | Detected   | Slc7a5        | 1.959196485 | 0.92215945 | 1.41062147 | 0.6639548 |
| A_55_P2022 | 39.2    | Detected | 47.6    | Detected   | 53.6    | Detected   | 76.8    | Detected   | Xndr-trpc2    | 1.959183673 | 1.36734694 | 1.61344538 | 1.1260504 |
| A_55_P2130 | 44      | Detected | 59.7    | Detected   | 47.2    | Detected   | 86.2    | Detected   | Pnpla1        | 1.959090909 | 1.07272727 | 1.4438861  | 0.7906198 |
| A_55_P2065 | 175.2   | Detected | 169.6   | Detected   | 102     | Detected   | 343.2   | Detected   | Stk30         | 1.95890411  | 0.58219178 | 2.02358491 | 0.6014151 |
| A_55_P2095 | 3446.9  | Detected | 4826.2  | Detected   | 3620.1  | Detected   | 6752.1  | Detected   | 6430548M08Rik | 1.958890597 | 1.05024805 | 1.39905101 | 0.7500932 |
| A_66_P1022 | 80.1    | Detected | 160.8   | Detected   | 111.4   | Detected   | 156.9   | Detected   | Gcsh          | 1.958801498 | 1.39076155 | 0.97574627 | 0.6927861 |
| A_52_P1824 | 592.1   | Detected | 612     | Detected   | 931     | Detected   | 1159.7  | Detected   | Rps6kb2       | 1.958621854 | 1.57236953 | 1.89493464 | 1.5212418 |
| A_52_P5233 | 12412.3 | Detected | 14992.3 | Detected   | 24203.7 | Detected   | 24286   | Detected   | Tmem147       | 1.956607559 | 1.94997704 | 1.61989821 | 1.6144087 |
| A_55_P2087 | 131.3   | Detected | 93.6    | Detected   | 184.4   | Detected   | 256.9   | Detected   | 9530077C14Rik | 1.956587966 | 1.40441736 | 2.74465812 | 1.9700855 |
| A_55_P1958 | 1969.1  | Detected | 1844.5  | Detected   | 3810.3  | Detected   | 3851.8  | Detected   | Nbeal2        | 1.956122086 | 1.93504647 | 2.0882624  | 2.0657631 |
| A_51_P4534 | 5659.2  | Detected | 5845.7  | Detected   | 7203.6  | Detected   | 11068   | Detected   | Slc1a5        | 1.955753463 | 1.27290076 | 1.89335751 | 1.2322904 |
| A_55_P2020 | 9026.2  | Detected | 3026.9  | Detected   | 18815.9 | Detected   | 17651.5 | Detected   | Dhrs3         | 1.955584853 | 2.08458709 | 5.83154382 | 6.2162278 |
| A_55_P2087 | 860.8   | Detected | 1113.2  | Detected   | 1473.9  | Detected   | 1682.8  | Detected   | Shroom1       | 1.954925651 | 1.71224442 | 1.51167805 | 1.3240208 |
| A_55_P2158 | 2005.9  | Detected | 3449.6  | Detected   | 2810.8  | Detected   | 3920.5  | Detected   | Hist1h4i      | 1.954484271 | 1.40126626 | 1.13650858 | 0.8148191 |
| A_55_P1978 | 8537.3  | Detected | 11775.4 | Detected   | 8290.3  | Detected   | 16684.4 | Detected   | Mospd3        | 1.954294683 | 0.97106814 | 1.41688605 | 0.7040355 |
| A_55_P1958 | 1225    | Detected | 3488    | Detected   | 2091.5  | Detected   | 2393.8  | Detected   | Klra16        | 1.954122449 | 1.70734694 | 0.68629587 | 0.5996273 |
| A_66_P1191 | 5334.3  | Detected | 5189.4  | Detected   | 9619.6  | Detected   | 10420.9 | Detected   | Cmtm6         | 1.953564666 | 1.80334814 | 2.00811269 | 1.8537018 |
| A_55_P2028 | 8026.3  | Detected | 21289.3 | Detected   | 13252.5 | Detected   | 15679.1 | Detected   | Klra16        | 1.953465482 | 1.6511344  | 0.73647795 | 0.6224958 |
| A_52_P6486 | 112.8   | Detected | 226.8   | Detected   | 229.9   | Detected   | 220.3   | Detected   | Dusp9         | 1.953014184 | 2.03812057 | 0.97134039 | 1.0136684 |
| A_55_P2013 | 17751.1 | Detected | 21210.7 | Detected   | 29054.2 | Detected   | 34665.3 | Detected   | Gsn           | 1.952853626 | 1.63675491 | 1.63433079 | 1.3697898 |
| A_55_P2149 | 202.6   | Detected | 203.5   | Detected   | 208.7   | Detected   | 395.5   | Detected   | Gm3448        | 1.952122409 | 1.03010859 | 1.94348894 | 1.0255528 |
| A_55_P2099 | 120     | Detected | 86.5    | Detected   | 142.3   | Detected   | 234.2   | Detected   | Plekha6       | 1.951666667 | 1.18583333 | 2.70751445 | 1.6450867 |
| A_52_P2781 | 4180.7  | Detected | 5490.5  | Detected   | 5887.2  | Detected   | 8158.6  | Detected   | Eif1ad        | 1.951491377 | 1.40818523 | 1.48594846 | 1.0722521 |
| A_55_P2151 | 22.5    | Detected | 27.9    | Detected   | 27.4    | Detected   | 43.9    | Not Detect | Sgcz          | 1.951111111 | 1.21777778 | 1.5734767  | 0.9820789 |
| A_52_P5144 | 4915.2  | Detected | 12979.6 | Detected   | 7990.6  | Detected   | 9590    | Detected   | Klra15        | 1.951090495 | 1.62569173 | 0.73885174 | 0.6156276 |
| A_55_P2018 | 9115.8  | Detected | 10932.8 | Detected   | 17316.9 | Detected   | 17783.9 | Detected   | Osbpl3        | 1.95088747  | 1.89965774 | 1.62665557 | 1.5839401 |
| A_55_P1958 | 4802.6  | Detected | 8945.7  | Detected   | 6640.5  | Detected   | 9369.3  | Detected   | Dhodh         | 1.950880773 | 1.38268854 | 1.04735236 | 0.7423119 |
| A_55_P2106 | 260.4   | Detected | 398     | Detected   | 276.9   | Detected   | 508     | Detected   | Kcna5         | 1.950844854 | 1.06336406 | 1.27638191 | 0.6957286 |
| A_51_P1119 | 22455.9 | Detected | 36694.9 | Detected   | 41657   | Detected   | 43801.3 | Detected   | Nudt19        | 1.950547518 | 1.85505814 | 1.19366179 | 1.1352259 |
| A_51_P1483 | 48.1    | Detected | 114.6   | Detected   | 219.3   | Detected   | 93.8    | Detected   | Fam117a       | 1.95010395  | 4.55925156 | 0.81849913 | 1.9136126 |
| A_51_P4794 | 258.6   | Detected | 248.6   | Detected   | 249.9   | Detected   | 504     | Detected   | Hyal1         | 1.948955916 | 0.96635731 | 2.02735318 | 1.0052293 |
| A_55_P2159 | 70.2    | Detected | 50.5    | Detected   | 48.3    | Detected   | 136.8   | Detected   | Gm5591        | 1.948717949 | 0.68803419 | 2.70891089 | 0.9564356 |
| A_55_P1987 | 15.6    | Detected | 14.7    | Not Detect | 22.4    | Detected   | 30.4    | Not Detect | Fam196a       | 1.948717949 | 1.43589744 | 2.06802721 | 1.5238095 |
| A_55_P2144 | 174.5   | Detected | 254.9   | Detected   | 222.1   | Detected   | 340     | Detected   | Recql5        | 1.948424069 | 1.27277937 | 1.33385641 | 0.8713221 |
| A_66_P1404 | 17.3    | Detected | 19.9    | Detected   | 9.6     | Not Detect | 33.7    | Not Detect | Map1a         | 1.947976879 | 0.55491329 | 1.69346734 | 0.4824121 |
| A_51_P2158 | 2992.7  | Detected | 2883.2  | Detected   | 4260.4  | Detected   | 5828.5  | Detected   | Aldh18a1      | 1.947572426 | 1.42359742 | 2.02153857 | 1.4776637 |
| A_55_P2139 | 4463.2  | Detected | 5431.1  | Detected   | 6885.1  | Detected   | 8691.5  | Detected   | Cwc15         | 1.9473696   | 1.54263757 | 1.60032038 | 1.2677174 |
| A_55_P2047 | 21403.7 | Detected | 20059   | Detected   | 25596.1 | Detected   | 41680.4 | Detected   | Coq2          | 1.947345552 | 1.19587268 | 2.07789022 | 1.2760407 |
| A_55_P2097 | 6640.6  | Detected | 8635.4  | Detected   | 6443.8  | Detected   | 12930   | Detected   | Cnep1r1       | 1.947113213 | 0.97036412 | 1.49732496 | 0.7462075 |
| A_66_P1305 | 785.8   | Detected | 1311.8  | Detected   | 1132.7  | Detected   | 1529.6  | Detected   | Ncoa1         | 1.946551285 | 1.44146093 | 1.16603141 | 0.86347   |

|            |         |            |         |            |         |            |         |            |               |             |            |            |           |
|------------|---------|------------|---------|------------|---------|------------|---------|------------|---------------|-------------|------------|------------|-----------|
| A_51_P2316 | 3585.4  | Detected   | 4969.8  | Detected   | 10721.7 | Detected   | 6976.6  | Detected   | Zfp239        | 1.94583589  | 2.99037764 | 1.40379895 | 2.1573705 |
| A_55_P2136 | 1448.7  | Detected   | 1665.8  | Detected   | 1877.4  | Detected   | 2818.4  | Detected   | Slc1a5        | 1.945468351 | 1.29592048 | 1.6919198  | 1.1270261 |
| A_55_P1998 | 667.8   | Detected   | 1782.8  | Detected   | 1030.1  | Detected   | 1299.1  | Detected   | Klra23        | 1.945342917 | 1.5425277  | 0.72868521 | 0.577799  |
| A_55_P2164 | 27.3    | Detected   | 35.5    | Detected   | 31.6    | Detected   | 53.1    | Detected   | 2010015L04Rik | 1.945054945 | 1.15750916 | 1.49577465 | 0.8901408 |
| A_66_P1169 | 202.7   | Detected   | 234.7   | Detected   | 289.1   | Detected   | 394.2   | Detected   | Tia1          | 1.94474593  | 1.42624568 | 1.67959097 | 1.2317853 |
| A_52_P6436 | 1948.7  | Detected   | 2478.4  | Detected   | 2151    | Detected   | 3789.7  | Detected   | Ikbkb         | 1.944732386 | 1.1038128  | 1.52909135 | 0.8678986 |
| A_51_P4818 | 7824.9  | Detected   | 16721.2 | Detected   | 8678.7  | Detected   | 15215.9 | Detected   | Spcs3         | 1.944548812 | 1.10911322 | 0.90997656 | 0.5190238 |
| A_55_P2257 | 53.8    | Detected   | 51.3    | Detected   | 46.3    | Detected   | 104.6   | Detected   | Gm7111        | 1.944237918 | 0.8605948  | 2.03898635 | 0.9025341 |
| A_52_P6198 | 21.4    | Detected   | 38.3    | Detected   | 24.4    | Detected   | 41.6    | Not Detect | 4930518F22Rik | 1.943925234 | 1.14018692 | 1.08616188 | 0.6370757 |
| A_55_P1960 | 25261.5 | Detected   | 22160.2 | Detected   | 32355.6 | Detected   | 49094.7 | Detected   | Acox1         | 1.943459415 | 1.28082655 | 2.21544481 | 1.4600771 |
| A_52_P3543 | 8359.2  | Detected   | 9453.1  | Detected   | 11385   | Detected   | 16244.1 | Detected   | 1190002F15Rik | 1.943260121 | 1.36197244 | 1.71838868 | 1.2043668 |
| A_51_P2860 | 1578.5  | Detected   | 2960.3  | Detected   | 2227.2  | Detected   | 3067.4  | Detected   | Ccdc117       | 1.943237251 | 1.41095977 | 1.03617877 | 0.7523562 |
| A_52_P2002 | 6303.2  | Detected   | 2866.2  | Detected   | 3672.7  | Detected   | 12247.6 | Detected   | Mocs1         | 1.943076533 | 0.58267229 | 4.27311423 | 1.281383  |
| A_55_P2006 | 55.7    | Detected   | 49.4    | Detected   | 94.2    | Detected   | 108.2   | Detected   | Ccdc85b       | 1.942549372 | 1.69120287 | 2.1902834  | 1.9068826 |
| A_51_P5134 | 5.2     | Not Detect | 20.7    | Detected   | 18.5    | Detected   | 10.1    | Not Detect | D630003M21Rik | 1.942307692 | 3.55769231 | 0.48792271 | 0.8937198 |
| A_51_P2397 | 912.8   | Detected   | 1609.9  | Detected   | 894.7   | Detected   | 1770.7  | Detected   | Plcd1         | 1.93985539  | 0.9801709  | 1.09988198 | 0.5557488 |
| A_51_P2882 | 8402.3  | Detected   | 11336.4 | Detected   | 12475.2 | Detected   | 16295.7 | Detected   | Cdk5rap3      | 1.93943325  | 1.48473632 | 1.43746692 | 1.1004552 |
| A_55_P1955 | 36.1    | Detected   | 69.5    | Detected   | 22.5    | Detected   | 70      | Detected   | Pax9          | 1.939058172 | 0.6232687  | 1.00719424 | 0.323741  |
| A_55_P2069 | 4256.6  | Detected   | 6301.4  | Detected   | 6665.5  | Detected   | 8253.4  | Detected   | Slc50a1       | 1.938965371 | 1.56592116 | 1.30977243 | 1.0577808 |
| A_55_P2202 | 24.5    | Detected   | 23.3    | Detected   | 21.5    | Detected   | 47.5    | Detected   | 4933400F21Rik | 1.93877551  | 0.87755102 | 2.03862661 | 0.9227468 |
| A_55_P2070 | 148.3   | Detected   | 29.6    | Detected   | 146.6   | Detected   | 287.4   | Detected   | Ehf           | 1.937963587 | 0.98853675 | 9.70945946 | 4.9527027 |
| A_55_P2036 | 563.8   | Detected   | 742.1   | Detected   | 1477.3  | Detected   | 1092.6  | Detected   | Hist3h2ba     | 1.937921249 | 2.62025541 | 1.47230831 | 1.9907021 |
| A_55_P2375 | 90.2    | Detected   | 86.8    | Detected   | 77.4    | Detected   | 174.8   | Detected   | P2rx3         | 1.937915743 | 0.85809313 | 2.01382488 | 0.8917051 |
| A_55_P1964 | 182     | Detected   | 170.2   | Detected   | 256.4   | Detected   | 352.7   | Detected   | Elac1         | 1.937912088 | 1.40879121 | 2.07226792 | 1.506463  |
| A_52_P4671 | 4431.9  | Detected   | 7130    | Detected   | 6155.8  | Detected   | 8587.6  | Detected   | Snd1          | 1.937679099 | 1.38897538 | 1.20443198 | 0.8633661 |
| A_55_P2068 | 30.4    | Detected   | 32.5    | Detected   | 39.2    | Detected   | 58.9    | Detected   | Pear1         | 1.9375      | 1.28947368 | 1.81230769 | 1.2061538 |
| A_55_P2031 | 47.4    | Detected   | 11.8    | Not Detect | 1636.5  | Detected   | 91.8    | Detected   | Abcg5         | 1.936708861 | 34.5253165 | 7.77966102 | 138.68644 |
| A_55_P2048 | 12067   | Detected   | 5281.7  | Detected   | 49782.6 | Detected   | 23363.2 | Detected   | Zfpm1         | 1.936123312 | 4.12551587 | 4.42342428 | 9.425488  |
| A_52_P745  | 1615    | Detected   | 1237.9  | Detected   | 1673.2  | Detected   | 3126.4  | Detected   | Acox3         | 1.935851393 | 1.03603715 | 2.52556749 | 1.3516439 |
| A_55_P2052 | 51.3    | Detected   | 62.8    | Detected   | 55.4    | Detected   | 99.3    | Detected   | A3galt2       | 1.935672515 | 1.07992203 | 1.58121019 | 0.8821656 |
| A_51_P1719 | 421.7   | Detected   | 542.4   | Detected   | 402.6   | Detected   | 815.8   | Detected   | Apoe          | 1.934550628 | 0.95470714 | 1.50405605 | 0.7422566 |
| A_51_P3419 | 47516.3 | Detected   | 41671.7 | Detected   | 61589.6 | Detected   | 91922.3 | Detected   | Tsc22d1       | 1.934542462 | 1.29617836 | 2.20586873 | 1.4779719 |
| A_55_P1969 | 1041.1  | Detected   | 1401.7  | Detected   | 1845.1  | Detected   | 2013.8  | Detected   | Lym5          | 1.934300259 | 1.77226011 | 1.43668403 | 1.3163302 |
| A_55_P2116 | 1229.1  | Detected   | 1446.7  | Detected   | 1222.2  | Detected   | 2377.2  | Detected   | Tesk2         | 1.934098121 | 0.99438614 | 1.64318794 | 0.8448192 |
| A_55_P2069 | 80.7    | Detected   | 89.6    | Detected   | 72.8    | Detected   | 156     | Detected   | Kctd1         | 1.933085502 | 0.90210657 | 1.74107143 | 0.8125    |
| A_52_P2255 | 3813.9  | Detected   | 4151.7  | Detected   | 4841.1  | Detected   | 7370.2  | Detected   | Parva         | 1.932457589 | 1.26933061 | 1.77522461 | 1.1660525 |
| A_55_P2024 | 13.3    | Not Detect | 15.1    | Detected   | 14.6    | Not Detect | 25.7    | Not Detect | Gm1987        | 1.932330827 | 1.09774436 | 1.70198675 | 0.9668874 |
| A_55_P2100 | 3737.1  | Detected   | 5569.6  | Detected   | 4946.3  | Detected   | 7220.8  | Detected   | Lrba          | 1.932193412 | 1.3235664  | 1.29646653 | 0.8880889 |
| A_55_P2035 | 459.1   | Detected   | 469.4   | Detected   | 653.7   | Detected   | 886.9   | Detected   | D3Erd751e     | 1.931823132 | 1.42387279 | 1.88943332 | 1.3926289 |
| A_55_P2144 | 4.4     | Not Detect | 11.3    | Not Detect | 17.8    | Detected   | 8.5     | Not Detect | Gm6772        | 1.931818182 | 4.04545455 | 0.75221239 | 1.5752212 |

|            |         |            |         |            |         |            |         |            |          |             |            |            |           |
|------------|---------|------------|---------|------------|---------|------------|---------|------------|----------|-------------|------------|------------|-----------|
| A_52_P1749 | 1102.3  | Detected   | 2091.8  | Detected   | 1286.8  | Detected   | 2129.4  | Detected   | Gja1     | 1.931779008 | 1.1673773  | 1.01797495 | 0.615164  |
| A_51_P1213 | 503.2   | Detected   | 693.1   | Detected   | 810.4   | Detected   | 971.9   | Detected   | Them4    | 1.931438792 | 1.61049285 | 1.40225076 | 1.1692396 |
| A_55_P2107 | 191.6   | Detected   | 184.4   | Detected   | 165.6   | Detected   | 370     | Detected   | Tssk5    | 1.931106472 | 0.86430063 | 2.00650759 | 0.8980477 |
| A_51_P3117 | 841.6   | Detected   | 736.1   | Detected   | 1000.1  | Detected   | 1625    | Detected   | Man2b2   | 1.930846008 | 1.18833175 | 2.20758049 | 1.3586469 |
| A_52_P5747 | 117.7   | Detected   | 280.6   | Detected   | 151.9   | Detected   | 227.2   | Detected   | Oit3     | 1.930331351 | 1.29056924 | 0.80969351 | 0.54134   |
| A_55_P2038 | 12.8    | Not Detect | 20.9    | Detected   | 29.9    | Detected   | 24.7    | Not Detect | Cst8     | 1.9296875   | 2.3359375  | 1.18181818 | 1.430622  |
| A_55_P2182 | 4281.8  | Detected   | 4212.1  | Detected   | 5532.8  | Detected   | 8261.7  | Detected   | Orai3    | 1.92949227  | 1.29216685 | 1.96142067 | 1.3135491 |
| A_55_P2160 | 116.4   | Detected   | 129.6   | Detected   | 138.2   | Detected   | 224.5   | Detected   | Foxd4    | 1.928694158 | 1.18728522 | 1.73225309 | 1.066358  |
| A_55_P2143 | 3991.8  | Detected   | 1975.7  | Detected   | 5579.4  | Detected   | 7698.7  | Detected   | Nkd2     | 1.928628689 | 1.39771532 | 3.89669484 | 2.8240117 |
| A_55_P2032 | 22.1    | Detected   | 29.3    | Detected   | 25.3    | Detected   | 42.6    | Not Detect | Cpt1c    | 1.92760181  | 1.14479638 | 1.45392491 | 0.8634812 |
| A_55_P2055 | 14813.5 | Detected   | 17265.7 | Detected   | 25061   | Detected   | 28549.2 | Detected   | Gsn      | 1.927242043 | 1.69176764 | 1.65352114 | 1.4514905 |
| A_52_P1850 | 42095.6 | Detected   | 41069.7 | Detected   | 64960.2 | Detected   | 81124.2 | Detected   | Adipor2  | 1.927142029 | 1.5431589  | 1.97528105 | 1.5817062 |
| A_52_P3159 | 38.2    | Detected   | 30.9    | Detected   | 235.6   | Detected   | 73.6    | Detected   | Tpm2     | 1.926701571 | 6.16753927 | 2.38187702 | 7.6245955 |
| A_52_P4426 | 8650.6  | Detected   | 9597.9  | Detected   | 8534.2  | Detected   | 16660.4 | Detected   | Cux1     | 1.925924213 | 0.98654429 | 1.73583805 | 0.8891737 |
| A_51_P3592 | 6529.4  | Detected   | 9070.8  | Detected   | 10403.3 | Detected   | 12573.8 | Detected   | Sec11c   | 1.925720587 | 1.59330107 | 1.38618424 | 1.1468999 |
| A_55_P2091 | 1077.5  | Detected   | 959.7   | Detected   | 1872.2  | Detected   | 2074.8  | Detected   | Coa4     | 1.925568445 | 1.7375406  | 2.1619256  | 1.950818  |
| A_55_P2252 | 72.3    | Detected   | 82.1    | Detected   | 72.8    | Detected   | 139.2   | Detected   | BB283564 | 1.925311203 | 1.00691563 | 1.6954933  | 0.8867235 |
| A_52_P6687 | 755.5   | Detected   | 1367.8  | Detected   | 802.4   | Detected   | 1454.2  | Detected   | Nutf2    | 1.924818001 | 1.06207809 | 1.06316713 | 0.5866355 |
| A_55_P2404 | 366.7   | Detected   | 629.2   | Detected   | 380.8   | Detected   | 705.8   | Detected   | Ccdc130  | 1.924734115 | 1.03845105 | 1.12174189 | 0.605213  |
| A_51_P3748 | 9279.8  | Detected   | 7252.3  | Detected   | 10119.2 | Detected   | 17855.4 | Detected   | Abca7    | 1.924114744 | 1.09045454 | 2.46203273 | 1.3953091 |
| A_52_P1357 | 3596.9  | Detected   | 4786.7  | Detected   | 5049.5  | Detected   | 6920.8  | Detected   | Creb3    | 1.924101309 | 1.40384776 | 1.44583951 | 1.0549021 |
| A_51_P2955 | 615.2   | Detected   | 558.9   | Detected   | 1319.8  | Detected   | 1183.6  | Detected   | Cutc     | 1.923927178 | 2.1453186  | 2.11773126 | 2.3614242 |
| A_55_P2055 | 1032.6  | Detected   | 842     | Detected   | 945.7   | Detected   | 1986.5  | Detected   | Parp3    | 1.923784621 | 0.9158435  | 2.35926366 | 1.1231591 |
| A_52_P4348 | 1151.8  | Detected   | 1141.4  | Detected   | 1923.2  | Detected   | 2215.5  | Detected   | Coa4     | 1.923511026 | 1.66973433 | 1.94103732 | 1.6849483 |
| A_51_P4330 | 1127.1  | Detected   | 630.1   | Detected   | 1711.5  | Detected   | 2167.5  | Detected   | Ppapdc2  | 1.923076923 | 1.5184988  | 3.43993017 | 2.7162355 |
| A_55_P2056 | 26168   | Detected   | 37561.1 | Detected   | 48850.2 | Detected   | 50303.1 | Detected   | Sf3b5    | 1.922313513 | 1.8667915  | 1.33923394 | 1.300553  |
| A_55_P1997 | 47.5    | Detected   | 56.2    | Detected   | 46.4    | Detected   | 91.3    | Detected   | Cwc22    | 1.922105263 | 0.97684211 | 1.62455516 | 0.8256228 |
| A_55_P2024 | 970.6   | Detected   | 1172.9  | Detected   | 1083.9  | Detected   | 1865.4  | Detected   | Siah2    | 1.921903977 | 1.11673192 | 1.59041692 | 0.9241197 |
| A_51_P4077 | 346.5   | Detected   | 572.8   | Detected   | 365.1   | Detected   | 665.8   | Detected   | Slc22a21 | 1.921500722 | 1.05367965 | 1.16236034 | 0.6373953 |
| A_51_P2028 | 544.3   | Detected   | 776.5   | Detected   | 672.5   | Detected   | 1045.8  | Detected   | Abcb9    | 1.921366893 | 1.23553188 | 1.34681262 | 0.8660657 |
| A_55_P2005 | 15.2    | Detected   | 14.9    | Not Detect | 22.5    | Detected   | 29.2    | Not Detect | Lyz14    | 1.921052632 | 1.48026316 | 1.95973154 | 1.5100671 |
| A_55_P2030 | 11.4    | Not Detect | 28.8    | Detected   | 16.6    | Detected   | 21.9    | Not Detect | Atp1a2   | 1.921052632 | 1.45614035 | 0.76041667 | 0.5763889 |
| A_55_P2089 | 37.9    | Detected   | 25.6    | Detected   | 34.2    | Detected   | 72.8    | Detected   | Rgs7     | 1.920844327 | 0.90237467 | 2.84375    | 1.3359375 |
| A_55_P2117 | 2465.7  | Detected   | 3934.9  | Detected   | 3218.6  | Detected   | 4736    | Detected   | Tmem106b | 1.920752727 | 1.30534939 | 1.2035884  | 0.8179623 |
| A_55_P1979 | 27.7    | Detected   | 28.7    | Detected   | 35.9    | Detected   | 53.2    | Detected   | Arap3    | 1.920577617 | 1.29602888 | 1.85365854 | 1.2508711 |
| A_66_P1066 | 35461.6 | Detected   | 47415.4 | Detected   | 31258.8 | Detected   | 68106.4 | Detected   | Slc7a1   | 1.9205676   | 0.88148307 | 1.43637721 | 0.6592542 |
| A_52_P1173 | 85.5    | Detected   | 128.6   | Detected   | 95.9    | Detected   | 164.2   | Detected   | Gja4     | 1.920467836 | 1.12163743 | 1.27682737 | 0.7457232 |
| A_51_P2662 | 13.8    | Not Detect | 22.5    | Detected   | 11.7    | Not Detect | 26.5    | Not Detect | Ighv14-2 | 1.920289855 | 0.84782609 | 1.17777778 | 0.52      |
| A_55_P2043 | 27.6    | Detected   | 53.9    | Detected   | 38      | Detected   | 53      | Detected   | Zfp667   | 1.920289855 | 1.37681159 | 0.98330241 | 0.7050093 |
| A_51_P1834 | 18.8    | Detected   | 12.2    | Not Detect | 15.4    | Not Detect | 36.1    | Not Detect | Htr6     | 1.920212766 | 0.81914894 | 2.95901639 | 1.2622951 |

|            |                  |                  |                  |                  |               |             |            |            |           |
|------------|------------------|------------------|------------------|------------------|---------------|-------------|------------|------------|-----------|
| A_55_P2075 | 77.6 Detected    | 95.4 Detected    | 79.6 Detected    | 149 Detected     | Gm10471       | 1.920103093 | 1.0257732  | 1.56184486 | 0.8343816 |
| A_55_P2105 | 5 Not Detect     | 115.7 Detected   | 5.6 Not Detect   | 9.6 Not Detect   | Mmp1b         | 1.92        | 1.12       | 0.08297321 | 0.048401  |
| A_55_P2288 | 137.1 Detected   | 150.6 Detected   | 249.7 Detected   | 263.2 Detected   | LOC497255     | 1.919766594 | 1.82129832 | 1.74767596 | 1.6580345 |
| A_55_P2029 | 287.8 Detected   | 310.2 Detected   | 283.2 Detected   | 552.5 Detected   | Fam214a       | 1.919735928 | 0.98401668 | 1.78110896 | 0.9129594 |
| A_51_P1233 | 32 Detected      | 37.1 Detected    | 32.5 Detected    | 61.4 Detected    | Olfcr74       | 1.91875     | 1.015625   | 1.65498652 | 0.8760108 |
| A_55_P1994 | 312.7 Detected   | 350.1 Detected   | 513 Detected     | 599.9 Detected   | Hrc           | 1.918452191 | 1.64055005 | 1.71351043 | 1.4652956 |
| A_55_P1968 | 3741.4 Detected  | 3918.4 Detected  | 3363.7 Detected  | 7175 Detected    | Btbd1         | 1.917731331 | 0.89904848 | 1.83110453 | 0.8584371 |
| A_55_P2028 | 24532.8 Detected | 29509.8 Detected | 36269.1 Detected | 47045.4 Detected | Slc39a11      | 1.917653101 | 1.47839219 | 1.59422971 | 1.2290527 |
| A_55_P2095 | 882.1 Detected   | 978.3 Detected   | 704.8 Detected   | 1691.3 Detected  | A430033K04Rik | 1.917356309 | 0.79900238 | 1.72881529 | 0.7204334 |
| A_52_P1106 | 119.5 Detected   | 195.8 Detected   | 164.7 Detected   | 229.1 Detected   | Orc3          | 1.917154812 | 1.37824268 | 1.1700715  | 0.8411645 |
| A_55_P1980 | 22007.4 Detected | 32187.4 Detected | 20040.7 Detected | 42182.7 Detected | Znhit1        | 1.916750729 | 0.9106346  | 1.31053456 | 0.6226256 |
| A_52_P3121 | 20.4 Detected    | 12.2 Not Detect  | 24.1 Detected    | 39.1 Not Detect  | Kndc1         | 1.916666667 | 1.18137255 | 3.20491803 | 1.9754098 |
| A_55_P1993 | 150 Detected     | 192.1 Detected   | 202.5 Detected   | 287.5 Detected   | Tmem116       | 1.916666667 | 1.35       | 1.49661635 | 1.0541385 |
| A_55_P2103 | 20.2 Detected    | 49.3 Detected    | 17.2 Detected    | 38.7 Not Detect  | Slc25a18      | 1.915841584 | 0.85148515 | 0.78498986 | 0.3488844 |
| A_55_P2111 | 112.8 Detected   | 84.7 Detected    | 142 Detected     | 216.1 Detected   | Noxo1         | 1.915780142 | 1.25886525 | 2.55135773 | 1.6765053 |
| A_55_P2063 | 81.9 Detected    | 120 Detected     | 154.6 Detected   | 156.9 Detected   | Tmem168       | 1.915750916 | 1.88766789 | 1.3075     | 1.2883333 |
| A_52_P1144 | 2831.3 Detected  | 2997.6 Detected  | 3841.8 Detected  | 5422.8 Detected  | Stat6         | 1.915303924 | 1.35690319 | 1.80904724 | 1.2816253 |
| A_52_P3063 | 3769.7 Detected  | 5355.3 Detected  | 5809.9 Detected  | 7219.6 Detected  | Asph          | 1.915165663 | 1.54121018 | 1.34812242 | 1.0848879 |
| A_55_P2154 | 21.2 Detected    | 28.7 Detected    | 19.8 Detected    | 40.6 Not Detect  | Ppp1cb        | 1.91509434  | 0.93396226 | 1.41463415 | 0.6898955 |
| A_55_P1970 | 11218.6 Detected | 12153.1 Detected | 14344.4 Detected | 21475.7 Detected | Mlit6         | 1.914294119 | 1.27862657 | 1.76709646 | 1.1803079 |
| A_55_P2095 | 31.5 Detected    | 37.7 Detected    | 100.3 Detected   | 60.3 Detected    | Pvrl3         | 1.914285714 | 3.18412698 | 1.5994695  | 2.6604775 |
| A_52_P5650 | 652.5 Detected   | 763.4 Detected   | 545.7 Detected   | 1248.9 Detected  | Cpne3         | 1.914022989 | 0.83632184 | 1.63597066 | 0.7148284 |
| A_55_P2145 | 540.7 Detected   | 421.5 Detected   | 398.8 Detected   | 1034.9 Detected  | Fastk         | 1.91400037  | 0.73756242 | 2.45527877 | 0.9461447 |
| A_55_P2083 | 81.2 Detected    | 75.1 Detected    | 73.5 Detected    | 155.4 Detected   | Gm2044        | 1.913793103 | 0.90517241 | 2.06924101 | 0.9786951 |
| A_55_P2367 | 10.4 Not Detect  | 29.9 Detected    | 20 Detected      | 19.9 Not Detect  | Acer2         | 1.913461538 | 1.92307692 | 0.66555184 | 0.6688963 |
| A_55_P1997 | 40.4 Detected    | 85.2 Detected    | 54.8 Detected    | 77.3 Detected    | Gm4871        | 1.913366337 | 1.35643564 | 0.907277   | 0.6431925 |
| A_55_P2146 | 17.3 Detected    | 12.5 Not Detect  | 11.3 Not Detect  | 33.1 Not Detect  | Gm11691       | 1.913294798 | 0.65317919 | 2.648      | 0.904     |
| A_55_P1998 | 117 Detected     | 202 Detected     | 45.7 Detected    | 223.8 Detected   | Oas1c         | 1.912820513 | 0.39059829 | 1.10792079 | 0.2262376 |
| A_52_P3931 | 42.4 Detected    | 85.1 Detected    | 44.1 Detected    | 81.1 Detected    | Lymr9         | 1.912735849 | 1.04009434 | 0.95299647 | 0.5182139 |
| A_55_P2083 | 2048.1 Detected  | 2382.3 Detected  | 2010.3 Detected  | 3917.1 Detected  | Purb          | 1.912553098 | 0.98154387 | 1.64425135 | 0.8438484 |
| A_51_P2451 | 30.8 Detected    | 23.2 Detected    | 17 Not Detect    | 58.9 Detected    | 4930591A17Rik | 1.912337662 | 0.55194805 | 2.5387931  | 0.7327586 |
| A_51_P1308 | 696.3 Detected   | 1194.2 Detected  | 883.9 Detected   | 1331.5 Detected  | Cog8          | 1.912250467 | 1.2694241  | 1.11497237 | 0.7401608 |
| A_66_P1358 | 227.9 Detected   | 231.6 Detected   | 229.9 Detected   | 435.7 Detected   | 2410080I02Rik | 1.911803423 | 1.00877578 | 1.88126079 | 0.9926598 |
| A_52_P1042 | 10.2 Not Detect  | 12.1 Not Detect  | 18.9 Detected    | 19.5 Not Detect  | Akap5         | 1.911764706 | 1.85294118 | 1.61157025 | 1.5619835 |
| A_55_P2014 | 691.2 Detected   | 797.9 Detected   | 356.3 Detected   | 1321.4 Detected  | Lrp8          | 1.911747685 | 0.51548032 | 1.65609726 | 0.4465472 |
| A_55_P2381 | 1110.4 Detected  | 696.6 Detected   | 1311.3 Detected  | 2122.5 Detected  | Jam2          | 1.911473343 | 1.18092579 | 3.04694229 | 1.8824289 |
| A_55_P2110 | 27 Detected      | 38.6 Detected    | 26.4 Detected    | 51.6 Not Detect  | BC107364      | 1.911111111 | 0.97777778 | 1.33678756 | 0.6839378 |
| A_51_P4137 | 18 Detected      | 28.3 Detected    | 30.7 Detected    | 34.4 Not Detect  | Ftcd          | 1.911111111 | 1.70555556 | 1.2155477  | 1.0848057 |
| A_55_P2170 | 28.1 Detected    | 24.2 Detected    | 38.9 Detected    | 53.7 Detected    | Gm10366       | 1.911032028 | 1.38434164 | 2.21900826 | 1.607438  |
| A_52_P3551 | 732.2 Detected   | 774.1 Detected   | 777.9 Detected   | 1399.2 Detected  | Gdap2         | 1.910953291 | 1.06241464 | 1.80751841 | 1.0049089 |

|            |                  |                  |                  |                  |               |             |            |            |           |
|------------|------------------|------------------|------------------|------------------|---------------|-------------|------------|------------|-----------|
| A_55_P2171 | 79.5 Detected    | 151.6 Detected   | 94.9 Detected    | 151.9 Detected   | Zfp786        | 1.910691824 | 1.19371069 | 1.00197889 | 0.6259894 |
| A_51_P1968 | 7492.6 Detected  | 9095 Detected    | 14050.6 Detected | 14311.6 Detected | Osbpl3        | 1.910097963 | 1.87526359 | 1.57356789 | 1.5448708 |
| A_51_P3003 | 16147.6 Detected | 25504.3 Detected | 16120 Detected   | 30833.7 Detected | Wwc2          | 1.909491194 | 0.99829077 | 1.20896084 | 0.6320503 |
| A_55_P2347 | 28.6 Detected    | 30.8 Detected    | 24.6 Detected    | 54.6 Detected    | D430040L24Rik | 1.909090909 | 0.86013986 | 1.77272727 | 0.7987013 |
| A_55_P2167 | 140.7 Detected   | 126.8 Detected   | 193.9 Detected   | 268.6 Detected   | Fcho1         | 1.909026297 | 1.37810945 | 2.11829653 | 1.5291798 |
| A_55_P2062 | 3468.9 Detected  | 4095 Detected    | 4003.1 Detected  | 6621.2 Detected  | Tmem238       | 1.908731875 | 1.15399694 | 1.61689866 | 0.977558  |
| A_55_P2087 | 119.3 Detected   | 130.7 Detected   | 95.7 Detected    | 227.6 Detected   | Ly6i          | 1.907795474 | 0.80217938 | 1.7413925  | 0.7322112 |
| A_55_P2093 | 162.6 Detected   | 151.1 Detected   | 152.7 Detected   | 310.2 Detected   | Apod          | 1.907749077 | 0.93911439 | 2.05294507 | 1.010589  |
| A_55_P2425 | 59.5 Detected    | 76.3 Detected    | 88.2 Detected    | 113.5 Detected   | 1700017107Rik | 1.907563025 | 1.48235294 | 1.48754915 | 1.1559633 |
| A_55_P2039 | 6038.7 Detected  | 5602.6 Detected  | 6989.1 Detected  | 11519.1 Detected | Hspb6         | 1.907546326 | 1.15738487 | 2.05602756 | 1.2474744 |
| A_55_P2049 | 1468.7 Detected  | 1831.3 Detected  | 2674.5 Detected  | 2800.8 Detected  | Sh3bp5        | 1.906992578 | 1.82099816 | 1.52940534 | 1.4604379 |
| A_51_P2964 | 3702 Detected    | 4849.2 Detected  | 5216.6 Detected  | 7057.6 Detected  | Lss           | 1.906428957 | 1.4091302  | 1.45541533 | 1.0757651 |
| A_55_P2269 | 26.7 Detected    | 30.8 Detected    | 55.5 Detected    | 50.9 Detected    | 4833417C18Rik | 1.906367041 | 2.07865169 | 1.6525974  | 1.8019481 |
| A_52_P3941 | 83.3 Detected    | 132.2 Detected   | 137.3 Detected   | 158.8 Detected   | Ccpg1         | 1.906362545 | 1.6482593  | 1.20121029 | 1.0385779 |
| A_55_P2019 | 1107.1 Detected  | 1029.7 Detected  | 2111.3 Detected  | 2109.9 Detected  | Neil1         | 1.905789902 | 1.90705447 | 2.04904341 | 2.050403  |
| A_55_P2224 | 203.1 Detected   | 167.8 Detected   | 194.5 Detected   | 387 Detected     | D230044B12Rik | 1.905465288 | 0.95765633 | 2.30631704 | 1.159118  |
| A_55_P2011 | 63.2 Detected    | 57.8 Detected    | 39.4 Detected    | 120.4 Detected   | Trav6-3       | 1.905063291 | 0.62341772 | 2.08304498 | 0.6816609 |
| A_55_P1961 | 1415 Detected    | 1351.4 Detected  | 2285 Detected    | 2695 Detected    | Ypel3         | 1.90459364  | 1.61484099 | 1.99422821 | 1.6908391 |
| A_55_P2088 | 1745.9 Detected  | 1886.9 Detected  | 2748.4 Detected  | 3325 Detected    | Deb1          | 1.904461882 | 1.57420242 | 1.76214956 | 1.456569  |
| A_55_P2192 | 24 Detected      | 31.4 Detected    | 8.9 Not Detect   | 45.7 Not Detect  | BB157357      | 1.904166667 | 0.37083333 | 1.45541401 | 0.2834395 |
| A_55_P2098 | 17.7 Detected    | 4.1 Not Detect   | 4.7 Not Detect   | 33.7 Not Detect  | Col26a1       | 1.903954802 | 0.26553672 | 8.2195122  | 1.1463415 |
| A_51_P3909 | 13.5 Not Detect  | 21.3 Detected    | 6.7 Not Detect   | 25.7 Not Detect  | Gm9961        | 1.903703704 | 0.4962963  | 1.20657277 | 0.314554  |
| A_55_P1956 | 104.2 Detected   | 104.7 Detected   | 181.8 Detected   | 198.3 Detected   | Plekha4       | 1.903071017 | 1.74472169 | 1.89398281 | 1.7363897 |
| A_52_P4052 | 5164.6 Detected  | 8106.2 Detected  | 7980.5 Detected  | 9827.6 Detected  | Tm7sf3        | 1.90287728  | 1.545231   | 1.21235597 | 0.9844934 |
| A_52_P2553 | 52.4 Detected    | 82.4 Detected    | 86.6 Detected    | 99.7 Detected    | Amer3         | 1.902671756 | 1.65267176 | 1.20995146 | 1.0509709 |
| A_55_P2172 | 3480.2 Detected  | 3818.2 Detected  | 2998.6 Detected  | 6620.9 Detected  | Krit1         | 1.902448135 | 0.86161715 | 1.73403698 | 0.7853439 |
| A_55_P2055 | 433.8 Detected   | 519.6 Detected   | 997.1 Detected   | 825.1 Detected   | Enpp1         | 1.902028585 | 2.29852467 | 1.58795227 | 1.9189761 |
| A_55_P1962 | 20.4 Detected    | 23.4 Detected    | 22.6 Detected    | 38.8 Not Detect  | Gm10286       | 1.901960784 | 1.10784314 | 1.65811966 | 0.965812  |
| A_55_P2216 | 2293.2 Detected  | 2577.8 Detected  | 2346.7 Detected  | 4360.9 Detected  | Rint1         | 1.901665795 | 1.02332984 | 1.69171386 | 0.9103499 |
| A_55_P2096 | 6923.8 Detected  | 11417.9 Detected | 13630.1 Detected | 13162.6 Detected | Myo5b         | 1.901065889 | 1.96858661 | 1.15280393 | 1.1937484 |
| A_51_P3127 | 572.6 Detected   | 703.1 Detected   | 897.2 Detected   | 1088.4 Detected  | Oxsm          | 1.900803353 | 1.56688788 | 1.54800171 | 1.2760631 |
| A_55_P2016 | 43.2 Detected    | 75.8 Detected    | 61 Detected      | 82.1 Detected    | Srcrb4d       | 1.900462963 | 1.41203704 | 1.08311346 | 0.8047493 |
| A_52_P6847 | 865.6 Detected   | 1104.1 Detected  | 1256.6 Detected  | 1645 Detected    | Zfp809        | 1.900415896 | 1.4517098  | 1.48990128 | 1.1381215 |
| A_55_P1971 | 63 Detected      | 118.3 Detected   | 145.1 Detected   | 119.7 Detected   | Mpp7          | 1.9         | 2.3031746  | 1.01183432 | 1.2265427 |
| A_55_P2026 | 109.4 Detected   | 84 Detected      | 120.3 Detected   | 207.8 Detected   | Zmat1         | 1.899451554 | 1.09963437 | 2.47380952 | 1.4321429 |
| A_55_P2394 | 40.5 Detected    | 36.6 Detected    | 31.9 Detected    | 76.9 Detected    | A930010G16Rik | 1.898765432 | 0.78765432 | 2.1010929  | 0.8715847 |
| A_51_P3946 | 5263.8 Detected  | 6027.6 Detected  | 6051.2 Detected  | 9994.7 Detected  | Mef2d         | 1.898761351 | 1.14958775 | 1.65815582 | 1.0039153 |
| A_55_P1979 | 9044.9 Detected  | 9774.7 Detected  | 12528 Detected   | 17172.8 Detected | Palm          | 1.8986169   | 1.38508994 | 1.7568621  | 1.2816762 |
| A_51_P1553 | 10.8 Not Detect  | 11.6 Not Detect  | 22.5 Detected    | 20.5 Not Detect  | Hc            | 1.898148148 | 2.08333333 | 1.76724138 | 1.9396552 |
| A_51_P3406 | 3729.3 Detected  | 2332.5 Detected  | 704.4 Detected   | 7078.7 Detected  | Rasl11a       | 1.898131017 | 0.18888263 | 3.03481243 | 0.3019936 |

|            |          |            |          |            |          |            |          |            |               |             |            |            |           |
|------------|----------|------------|----------|------------|----------|------------|----------|------------|---------------|-------------|------------|------------|-----------|
| A_52_P6392 | 1141.1   | Detected   | 772.2    | Detected   | 2025.6   | Detected   | 2165.7   | Detected   | Fgd4          | 1.89790553  | 1.77512926 | 2.8045843  | 2.6231546 |
| A_51_P3629 | 347.2    | Detected   | 588.8    | Detected   | 564.6    | Detected   | 658.9    | Detected   | Fbxo36        | 1.897753456 | 1.62615207 | 1.11905571 | 0.9588995 |
| A_55_P2167 | 37.1     | Detected   | 77.5     | Detected   | 50.9     | Detected   | 70.4     | Detected   | 6330416G13Rik | 1.897574124 | 1.37196765 | 0.9083871  | 0.6567742 |
| A_51_P2103 | 78.1     | Detected   | 74.6     | Detected   | 66.5     | Detected   | 148.2    | Detected   | Slc17a8       | 1.897567222 | 0.85147247 | 1.98659517 | 0.8914209 |
| A_55_P2049 | 3652.3   | Detected   | 5084.1   | Detected   | 4550.4   | Detected   | 6928.3   | Detected   | Tpp2          | 1.896969033 | 1.24589984 | 1.36273873 | 0.8950257 |
| A_51_P2119 | 2000.8   | Detected   | 4392.9   | Detected   | 3135.9   | Detected   | 3795.2   | Detected   | Sgms2         | 1.896841263 | 1.56732307 | 0.86393954 | 0.7138565 |
| A_52_P5033 | 2905.3   | Detected   | 3778     | Detected   | 3672.7   | Detected   | 5509.9   | Detected   | Erlin2        | 1.896499501 | 1.26413795 | 1.45841715 | 0.9721281 |
| A_55_P1973 | 2152.9   | Detected   | 1584.3   | Detected   | 2470.4   | Detected   | 4082.5   | Detected   | Ppm1l         | 1.896279437 | 1.1474755  | 2.57684782 | 1.5593006 |
| A_51_P3238 | 6117.8   | Detected   | 4531.4   | Detected   | 8626.6   | Detected   | 11599.4  | Detected   | Coro7         | 1.896008369 | 1.41008206 | 2.55978285 | 1.9037384 |
| A_51_P4973 | 12.5     | Not Detect | 21.7     | Detected   | 14.6     | Not Detect | 23.7     | Not Detect | Olfrc30       | 1.896       | 1.168      | 1.0921659  | 0.6728111 |
| A_51_P2233 | 204.3    | Detected   | 242.8    | Detected   | 209      | Detected   | 387.3    | Detected   | Sh3glb1       | 1.895741557 | 1.02300538 | 1.59514003 | 0.8607908 |
| A_52_P7825 | 3935     | Detected   | 5609.7   | Detected   | 4573.5   | Detected   | 7458.2   | Detected   | Plekha2       | 1.895349428 | 1.16226175 | 1.32951851 | 0.8152842 |
| A_55_P1977 | 44.9     | Detected   | 52.7     | Detected   | 47       | Detected   | 85.1     | Detected   | Itgam         | 1.89532294  | 1.0467706  | 1.61480076 | 0.8918406 |
| A_51_P2019 | 2904.9   | Detected   | 4964     | Detected   | 4546.7   | Detected   | 5504.6   | Detected   | Ndufb5        | 1.894936142 | 1.56518297 | 1.10890411 | 0.9159347 |
| A_51_P4567 | 81.1     | Detected   | 41.4     | Detected   | 29.2     | Detected   | 153.6    | Detected   | Azgp1         | 1.893958076 | 0.36004932 | 3.71014493 | 0.705314  |
| A_51_P2085 | 182.6    | Detected   | 217.3    | Detected   | 226.8    | Detected   | 345.8    | Detected   | Decr1         | 1.893756846 | 1.24205915 | 1.59134837 | 1.0437184 |
| A_66_P1062 | 607      | Detected   | 709.5    | Detected   | 911.2    | Detected   | 1149.4   | Detected   | Gm5106        | 1.893574959 | 1.50115321 | 1.62001409 | 1.2842847 |
| A_51_P4408 | 1137     | Detected   | 2220.4   | Detected   | 2150.2   | Detected   | 2152.8   | Detected   | Mtrf1         | 1.893403694 | 1.89111697 | 0.96955504 | 0.9683841 |
| A_51_P3565 | 225.3    | Detected   | 384.4    | Detected   | 304.6    | Detected   | 426.5    | Detected   | Exd2          | 1.893031514 | 1.35197514 | 1.10952133 | 0.7924037 |
| A_52_P6351 | 3706.2   | Detected   | 3541.2   | Detected   | 4125.5   | Detected   | 7015.3   | Detected   | Rras          | 1.892855216 | 1.11313475 | 1.98105162 | 1.1650006 |
| A_55_P2389 | 48.2     | Detected   | 39.3     | Detected   | 32.7     | Detected   | 91.2     | Detected   | Tiaf2         | 1.892116183 | 0.67842324 | 2.32061069 | 0.8320611 |
| A_55_P2168 | 19.4     | Detected   | 24.5     | Detected   | 16.9     | Not Detect | 36.7     | Not Detect | Fam163b       | 1.891752577 | 0.87113402 | 1.49795918 | 0.6897959 |
| A_55_P2042 | 51.7     | Detected   | 41.6     | Detected   | 44.6     | Detected   | 97.8     | Detected   | Adig          | 1.891682785 | 0.86266925 | 2.35096154 | 1.0721154 |
| A_55_P2107 | 16.6     | Detected   | 8.3      | Not Detect | 12.1     | Not Detect | 31.4     | Not Detect | Psd           | 1.891566265 | 0.72891566 | 3.78313253 | 1.4578313 |
| A_51_P4436 | 19.3     | Detected   | 21.4     | Detected   | 30       | Detected   | 36.5     | Not Detect | Rasl10b       | 1.89119171  | 1.55440415 | 1.70560748 | 1.4018692 |
| A_51_P2075 | 105889.5 | Detected   | 109260.4 | Detected   | 259984.8 | Detected   | 200244.7 | Detected   | Anxa8         | 1.891072297 | 2.45524627 | 1.83272897 | 2.3794971 |
| A_55_P2085 | 44.7     | Detected   | 30       | Detected   | 3.6      | Not Detect | 84.5     | Detected   | Sprr2i        | 1.890380313 | 0.08053691 | 2.81666667 | 0.12      |
| A_55_P2240 | 22.8     | Detected   | 20.2     | Detected   | 15.8     | Not Detect | 43.1     | Not Detect | Gira4         | 1.890350877 | 0.69298246 | 2.13366337 | 0.7821782 |
| A_55_P2088 | 721.1    | Detected   | 871      | Detected   | 975.5    | Detected   | 1363     | Detected   | Mtif3         | 1.890167799 | 1.35279434 | 1.56486797 | 1.119977  |
| A_51_P1537 | 74.6     | Detected   | 56.7     | Detected   | 56.4     | Detected   | 141      | Detected   | Kif23         | 1.890080429 | 0.75603217 | 2.48677249 | 0.994709  |
| A_55_P2254 | 452.9    | Detected   | 396.5    | Detected   | 320.5    | Detected   | 856      | Detected   | BB212172      | 1.890041952 | 0.70766174 | 2.15889029 | 0.8083228 |
| A_55_P2174 | 2334     | Detected   | 4402.2   | Detected   | 3063.2   | Detected   | 4411.3   | Detected   | Hist1h4i      | 1.890017138 | 1.31242502 | 1.00206715 | 0.6958339 |
| A_51_P3220 | 61.1     | Detected   | 55.8     | Detected   | 69       | Detected   | 115.4    | Detected   | Ablim2        | 1.888707038 | 1.12929624 | 2.06810036 | 1.2365591 |
| A_52_P3675 | 1009     | Detected   | 2398     | Detected   | 584      | Detected   | 1905.4   | Detected   | Nexn          | 1.888404361 | 0.57879088 | 0.79457882 | 0.2435363 |
| A_55_P2127 | 168.7    | Detected   | 175.6    | Detected   | 155.6    | Detected   | 318.4    | Detected   | Btbd1         | 1.887374037 | 0.92234736 | 1.81321185 | 0.8861048 |
| A_51_P4967 | 2349.2   | Detected   | 3837.8   | Detected   | 3488.5   | Detected   | 4433.7   | Detected   | Pomk          | 1.887323344 | 1.48497361 | 1.15527125 | 0.9089843 |
| A_55_P2100 | 39.7     | Detected   | 39.7     | Detected   | 30.7     | Detected   | 74.9     | Detected   | Adra1b        | 1.886649874 | 0.77329975 | 1.88664987 | 0.7732997 |
| A_52_P5572 | 5279.8   | Detected   | 1933.3   | Detected   | 13717.2  | Detected   | 9961.1   | Detected   | Tmprss2       | 1.886643433 | 2.59805296 | 5.15238194 | 7.0952258 |
| A_55_P1984 | 16515.7  | Detected   | 19418.5  | Detected   | 20181.5  | Detected   | 31153.9  | Detected   | Pde4dip       | 1.886320289 | 1.2219585  | 1.60434122 | 1.0392924 |
| A_55_P2183 | 2926.6   | Detected   | 3093     | Detected   | 3955.5   | Detected   | 5519.6   | Detected   | Gm5617        | 1.886011071 | 1.35156837 | 1.78454575 | 1.2788555 |

|            |                  |                  |                  |                   |               |             |            |            |           |
|------------|------------------|------------------|------------------|-------------------|---------------|-------------|------------|------------|-----------|
| A_52_P4014 | 33.3 Detected    | 69.6 Detected    | 3.3 Not Detect   | 62.8 Detected     | Inha          | 1.885885886 | 0.0990991  | 0.90229885 | 0.0474138 |
| A_55_P2010 | 18028.3 Detected | 19202.6 Detected | 28523.8 Detected | 33989.5 Detected  | Dpm3          | 1.88534138  | 1.58216804 | 1.77004676 | 1.4854134 |
| A_55_P2082 | 20.9 Detected    | 34.1 Detected    | 38.7 Detected    | 39.4 Not Detect   | A630001G21Rik | 1.885167464 | 1.85167464 | 1.15542522 | 1.1348974 |
| A_55_P2238 | 52.1 Detected    | 61.4 Detected    | 119.2 Detected   | 98.2 Detected     | A730091E23Rik | 1.884836852 | 2.28790787 | 1.59934853 | 1.9413681 |
| A_51_P1297 | 1978.7 Detected  | 2144.6 Detected  | 2069.9 Detected  | 3728.9 Detected   | Hectd3        | 1.884520139 | 1.04609087 | 1.73873916 | 0.9651683 |
| A_55_P1995 | 1236 Detected    | 1390.3 Detected  | 1374.3 Detected  | 2329.2 Detected   | Meis1         | 1.884466019 | 1.1118932  | 1.67532187 | 0.9884917 |
| A_55_P2141 | 28.5 Detected    | 57.7 Detected    | 35 Detected      | 53.7 Detected     | Rnaseh2a      | 1.884210526 | 1.22807018 | 0.93067591 | 0.6065858 |
| A_55_P2011 | 550.6 Detected   | 848.3 Detected   | 839.2 Detected   | 1037.1 Detected   | L3mbtl3       | 1.883581547 | 1.52415547 | 1.22256277 | 0.9892727 |
| A_51_P3198 | 19700.3 Detected | 18847.8 Detected | 27575.2 Detected | 37106.4 Detected  | Acadm         | 1.883544921 | 1.39973503 | 1.96873906 | 1.4630461 |
| A_55_P2418 | 120.9 Detected   | 95.1 Detected    | 171.6 Detected   | 227.7 Detected    | 4930577N17Rik | 1.88337469  | 1.41935484 | 2.39432177 | 1.8044164 |
| A_51_P1108 | 58463.8 Detected | 58242.1 Detected | 45521.6 Detected | 110102.2 Detected | Nudt9         | 1.883254253 | 0.77862883 | 1.89042291 | 0.7815927 |
| A_65_P1895 | 13.7 Detected    | 17.9 Detected    | 15.5 Detected    | 25.8 Not Detect   | 4931406P16Rik | 1.883211679 | 1.13138686 | 1.44134078 | 0.8659218 |
| A_55_P1954 | 8067.2 Detected  | 9939.1 Detected  | 5661.7 Detected  | 15191.3 Detected  | Cyb561        | 1.883094506 | 0.70181724 | 1.52843819 | 0.5696391 |
| A_66_P1011 | 9.4 Not Detect   | 22.6 Detected    | 9.6 Not Detect   | 17.7 Not Detect   | Chd2          | 1.882978723 | 1.0212766  | 0.78318584 | 0.4247788 |
| A_52_P1618 | 1120.2 Detected  | 1704.7 Detected  | 1467.4 Detected  | 2109 Detected     | Ovca2         | 1.882699518 | 1.30994465 | 1.23716783 | 0.8607966 |
| A_55_P2151 | 19.6 Detected    | 13.1 Not Detect  | 76 Detected      | 36.9 Not Detect   | 2210411A11Rik | 1.882653061 | 3.87755102 | 2.81679389 | 5.8015267 |
| A_51_P3487 | 3804.7 Detected  | 2543.9 Detected  | 6589.3 Detected  | 7159.8 Detected   | Llgl2         | 1.881830368 | 1.73188425 | 2.81449743 | 2.5902355 |
| A_66_P1263 | 19693.5 Detected | 22414.1 Detected | 22364.8 Detected | 37056.6 Detected  | Zfp703        | 1.88166654  | 1.13564374 | 1.65327182 | 0.9978005 |
| A_55_P2014 | 123.2 Detected   | 272 Detected     | 3.4 Not Detect   | 231.8 Detected    | Armcx6        | 1.881493506 | 0.0275974  | 0.85220588 | 0.0125    |
| A_52_P4096 | 138.2 Detected   | 164.7 Detected   | 157.3 Detected   | 260 Detected      | Wdr11         | 1.881331404 | 1.1382055  | 1.57862781 | 0.9550698 |
| A_52_P4205 | 168.5 Detected   | 249.6 Detected   | 286 Detected     | 317 Detected      | Cry1          | 1.881305638 | 1.69732938 | 1.27003205 | 1.1458333 |
| A_52_P1173 | 388.4 Detected   | 473.3 Detected   | 413.2 Detected   | 730.5 Detected    | Rbl2          | 1.880792997 | 1.0638517  | 1.54341855 | 0.8730192 |
| A_55_P2101 | 27.6 Detected    | 64.4 Detected    | 30.4 Detected    | 51.9 Detected     | Rpl18a        | 1.880434783 | 1.10144928 | 0.80590062 | 0.4720497 |
| A_55_P2028 | 10 Not Detect    | 27.8 Detected    | 3 Not Detect     | 18.8 Not Detect   | Coro6         | 1.88        | 0.3        | 0.67625899 | 0.1079137 |
| A_52_P2927 | 5 Not Detect     | 55.5 Detected    | 3.4 Not Detect   | 9.4 Not Detect    | Col8a1        | 1.88        | 0.68       | 0.16936937 | 0.0612613 |
| A_52_P6508 | 25504.7 Detected | 17871.1 Detected | 30198 Detected   | 47942.8 Detected  | Myo1d         | 1.879763338 | 1.18401706 | 2.6827     | 1.6897673 |
| A_55_P1953 | 82.2 Detected    | 103.2 Detected   | 121.5 Detected   | 154.5 Detected    | Gm14484       | 1.879562044 | 1.47810219 | 1.49709302 | 1.1773256 |
| A_55_P2010 | 5.8 Not Detect   | 3.8 Not Detect   | 32.2 Detected    | 10.9 Not Detect   | Sell          | 1.879310345 | 5.55172414 | 2.86842105 | 8.4736842 |
| A_51_P4228 | 574.4 Detected   | 1176.7 Detected  | 1268.1 Detected  | 1079.4 Detected   | Tmem14a       | 1.879178273 | 2.20769499 | 0.91731112 | 1.0776749 |
| A_51_P4152 | 1548.4 Detected  | 1992.5 Detected  | 1572.9 Detected  | 2909.3 Detected   | Zmat3         | 1.878907259 | 1.01582278 | 1.46012547 | 0.7894103 |
| A_52_P6469 | 421.9 Detected   | 781.8 Detected   | 799.3 Detected   | 792.7 Detected    | D16Ert472e    | 1.878881251 | 1.89452477 | 1.01394218 | 1.0223842 |
| A_52_P5850 | 10603.2 Detected | 12901 Detected   | 10214.1 Detected | 19921.7 Detected  | Cnep1r1       | 1.878838464 | 0.96330353 | 1.54419812 | 0.7917293 |
| A_51_P4201 | 13.2 Not Detect  | 15.8 Detected    | 11 Not Detect    | 24.8 Not Detect   | Fam219aos     | 1.878787879 | 0.83333333 | 1.56962025 | 0.6962025 |
| A_55_P2182 | 294.4 Detected   | 357.8 Detected   | 301.7 Detected   | 553.1 Detected    | Atg10         | 1.878736413 | 1.0247962  | 1.54583566 | 0.8432085 |
| A_55_P1986 | 17047.5 Detected | 24983.1 Detected | 18012.2 Detected | 32016.9 Detected  | Klhdc4        | 1.878099428 | 1.05658894 | 1.28154232 | 0.7209754 |
| A_51_P3825 | 189.4 Detected   | 91.5 Detected    | 90.6 Detected    | 355.6 Detected    | Zfp418        | 1.87750792  | 0.47835269 | 3.8863388  | 0.9901639 |
| A_55_P2126 | 21.2 Detected    | 15.6 Detected    | 34.4 Detected    | 39.8 Not Detect   | Mamstr        | 1.877358491 | 1.62264151 | 2.55128205 | 2.2051282 |
| A_55_P2124 | 24.4 Detected    | 18.8 Detected    | 46.1 Detected    | 45.8 Not Detect   | Gapdhs        | 1.87704918  | 1.88934426 | 2.43617021 | 2.4521277 |
| A_55_P2168 | 911.6 Detected   | 1000.2 Detected  | 1404.5 Detected  | 1710.3 Detected   | Relb          | 1.876151821 | 1.54069767 | 1.70995801 | 1.4042192 |
| A_55_P2158 | 233.1 Detected   | 318.7 Detected   | 354.6 Detected   | 437.3 Detected    | Ube4a         | 1.876018876 | 1.52123552 | 1.37213681 | 1.1126451 |

|            |                  |                  |                  |                  |               |             |            |            |           |
|------------|------------------|------------------|------------------|------------------|---------------|-------------|------------|------------|-----------|
| A_55_P2137 | 67.4 Detected    | 65.1 Detected    | 76 Detected      | 126.4 Detected   | Nphp4         | 1.87537092  | 1.12759644 | 1.94162826 | 1.1674347 |
| A_55_P2088 | 795.6 Detected   | 681.9 Detected   | 738.4 Detected   | 1492 Detected    | Vps13d        | 1.875314228 | 0.92810458 | 2.18800411 | 1.0828567 |
| A_55_P2055 | 1875.7 Detected  | 2307.7 Detected  | 2667.1 Detected  | 3516.6 Detected  | Pafah2        | 1.874820067 | 1.42192248 | 1.52385492 | 1.1557395 |
| A_55_P2193 | 117.3 Detected   | 92.6 Detected    | 72 Detected      | 219.9 Detected   | 6720420G18Rik | 1.874680307 | 0.61381074 | 2.37473002 | 0.7775378 |
| A_51_P1608 | 91.4 Detected    | 98.6 Detected    | 48 Detected      | 171.3 Detected   | Cspg4         | 1.874179431 | 0.52516411 | 1.73732252 | 0.4868154 |
| A_55_P2148 | 27.8 Detected    | 31.4 Detected    | 26.8 Detected    | 52.1 Detected    | Bend4         | 1.874100719 | 0.96402878 | 1.65923567 | 0.8535032 |
| A_55_P1960 | 51.6 Detected    | 75.8 Detected    | 60.7 Detected    | 96.7 Detected    | Cntn1         | 1.874031008 | 1.17635659 | 1.27572559 | 0.8007916 |
| A_55_P2113 | 2475.6 Detected  | 3508 Detected    | 2370.5 Detected  | 4639.3 Detected  | Yif1b         | 1.874010341 | 0.95754565 | 1.32249145 | 0.6757412 |
| A_55_P2077 | 5734.4 Detected  | 2709.3 Detected  | 14491.9 Detected | 10744.3 Detected | Fam102a       | 1.873657227 | 2.5271868  | 3.9657107  | 5.3489462 |
| A_55_P2071 | 1521.5 Detected  | 1493.9 Detected  | 2054.9 Detected  | 2849.5 Detected  | Kank3         | 1.872822872 | 1.35057509 | 1.90742352 | 1.3755271 |
| A_55_P1973 | 3789.8 Detected  | 5521.3 Detected  | 3558.9 Detected  | 7095.5 Detected  | Slc7a5        | 1.872262389 | 0.9390733  | 1.28511401 | 0.6445765 |
| A_52_P5852 | 534.8 Detected   | 742.2 Detected   | 723.5 Detected   | 1000.8 Detected  | Ccpg1         | 1.871353777 | 1.35284218 | 1.34842361 | 0.9748046 |
| A_55_P2028 | 13.2 Not Detect  | 18.5 Not Detect  | 25.8 Detected    | 24.7 Not Detect  | Pr12b1        | 1.871212121 | 1.95454545 | 1.33513514 | 1.3945946 |
| A_51_P4847 | 17401.1 Detected | 27462.4 Detected | 16396.2 Detected | 32560.4 Detected | Tmem66        | 1.871169064 | 0.94225078 | 1.18563563 | 0.5970418 |
| A_66_P1055 | 16.3 Detected    | 18.1 Detected    | 12.2 Not Detect  | 30.5 Not Detect  | Mam1d1        | 1.871165644 | 0.74846626 | 1.68508287 | 0.6740331 |
| A_55_P2023 | 524.9 Detected   | 496.3 Detected   | 481.8 Detected   | 981.5 Detected   | Rnf214        | 1.869879977 | 0.91788912 | 1.9776345  | 0.9707838 |
| A_55_P2186 | 14.6 Not Detect  | 22.9 Detected    | 16.9 Not Detect  | 27.3 Not Detect  | Gm3317        | 1.869863014 | 1.15753425 | 1.19213974 | 0.7379913 |
| A_51_P2735 | 10227.5 Detected | 13270.1 Detected | 7862.3 Detected  | 19106.4 Detected | Syce2         | 1.868139819 | 0.76874114 | 1.43980829 | 0.5924823 |
| A_52_P5750 | 19495.7 Detected | 28831.8 Detected | 25131.1 Detected | 36419.7 Detected | Babam1        | 1.868088861 | 1.28905861 | 1.26317816 | 0.8716452 |
| A_51_P2733 | 22460.4 Detected | 23091.7 Detected | 21865 Detected   | 41955.8 Detected | Sec31a        | 1.867989884 | 0.97349112 | 1.81692123 | 0.946877  |
| A_55_P1966 | 5.3 Not Detect   | 3.5 Not Detect   | 47.8 Detected    | 9.9 Not Detect   | Ssx9          | 1.867924528 | 9.01886792 | 2.82857143 | 13.657143 |
| A_55_P2206 | 66.9 Detected    | 86.7 Detected    | 95.5 Detected    | 124.9 Detected   | 9130403123Rik | 1.86696562  | 1.42750374 | 1.44059977 | 1.1014994 |
| A_55_P1978 | 13866.7 Detected | 18991.4 Detected | 21889.7 Detected | 25883.6 Detected | H2-Q7         | 1.866601282 | 1.57858034 | 1.36291163 | 1.1526112 |
| A_52_P1885 | 50.1 Detected    | 57.3 Detected    | 73.3 Detected    | 93.5 Detected    | 5430411C19Rik | 1.866267465 | 1.46307385 | 1.63176265 | 1.2792321 |
| A_55_P2019 | 434.4 Detected   | 397.1 Detected   | 274.7 Detected   | 810.5 Detected   | Gm12942       | 1.865791897 | 0.63236648 | 2.0410476  | 0.6917653 |
| A_52_P4139 | 1690.3 Detected  | 1177.2 Detected  | 1275.3 Detected  | 3152.9 Detected  | Mthfr         | 1.865290185 | 0.75448145 | 2.67830445 | 1.0833333 |
| A_55_P2162 | 37322.2 Detected | 31161.1 Detected | 41976.3 Detected | 69611.6 Detected | Bri3          | 1.865152644 | 1.12470058 | 2.23392627 | 1.3470738 |
| A_55_P2108 | 25.9 Detected    | 339.3 Detected   | 23.5 Detected    | 48.3 Not Detect  | Srgap3        | 1.864864865 | 0.90733591 | 0.1423519  | 0.0692602 |
| A_55_P2053 | 20.7 Detected    | 20.2 Detected    | 34.9 Detected    | 38.6 Not Detect  | St6galnac6    | 1.8647343   | 1.68599034 | 1.91089109 | 1.7277228 |
| A_52_P5271 | 2290.8 Detected  | 2972 Detected    | 3725.4 Detected  | 4270.8 Detected  | Arhgap12      | 1.864326873 | 1.62624411 | 1.43701211 | 1.2534993 |
| A_55_P1981 | 1201.2 Detected  | 2066.1 Detected  | 1469.3 Detected  | 2239.3 Detected  | Atic          | 1.864219114 | 1.22319347 | 1.08382944 | 0.7111466 |
| A_66_P1266 | 26.5 Detected    | 5.6 Not Detect   | 27.8 Detected    | 49.4 Detected    | Car8          | 1.864150943 | 1.0490566  | 8.82142857 | 4.9642857 |
| A_51_P3876 | 4702.4 Detected  | 9343.1 Detected  | 4807 Detected    | 8764.3 Detected  | Hif1a         | 1.863792957 | 1.02224396 | 0.93805054 | 0.5144973 |
| A_51_P2856 | 19 Detected      | 22.6 Detected    | 23.4 Detected    | 35.4 Not Detect  | Pigz          | 1.863157895 | 1.23157895 | 1.56637168 | 1.0353982 |
| A_52_P5952 | 2749.4 Detected  | 3390.3 Detected  | 2918.8 Detected  | 5122.2 Detected  | Vps35         | 1.86302466  | 1.06161344 | 1.51083975 | 0.8609268 |
| A_55_P2084 | 56.2 Detected    | 121.2 Detected   | 33.4 Detected    | 104.7 Detected   | Mtmr7         | 1.862989324 | 0.59430605 | 0.86386139 | 0.2755776 |
| A_55_P2334 | 57.6 Detected    | 36.2 Detected    | 104 Detected     | 107.3 Detected   | 1700096K18Rik | 1.862847222 | 1.80555556 | 2.9640884  | 2.8729282 |
| A_51_P5143 | 18.2 Detected    | 9.6 Not Detect   | 22.7 Detected    | 33.9 Not Detect  | Slc13a4       | 1.862637363 | 1.24725275 | 3.53125    | 2.3645833 |
| A_52_P6539 | 3263.5 Detected  | 4682.2 Detected  | 2944.2 Detected  | 6078.3 Detected  | Atf7ip        | 1.862509576 | 0.90216026 | 1.2981718  | 0.628807  |
| A_55_P2075 | 123.6 Detected   | 154.4 Detected   | 115.6 Detected   | 230.2 Detected   | Ttl13         | 1.862459547 | 0.93527508 | 1.49093264 | 0.7487047 |



|            |         |            |         |            |         |            |         |            |          |             |            |            |           |
|------------|---------|------------|---------|------------|---------|------------|---------|------------|----------|-------------|------------|------------|-----------|
| A_51_P4682 | 156.9   | Detected   | 168.8   | Detected   | 156.2   | Detected   | 292.2   | Detected   | Dennd4a  | 1.862332696 | 0.99553856 | 1.73104265 | 0.9253555 |
| A_66_P1053 | 328.7   | Detected   | 424.1   | Detected   | 485.8   | Detected   | 612     | Detected   | Gm15706  | 1.861880134 | 1.47794341 | 1.44305588 | 1.1454846 |
| A_55_P2070 | 6.5     | Not Detect | 12.6    | Not Detect | 20.2    | Detected   | 12.1    | Not Detect | Ngb      | 1.861538462 | 3.10769231 | 0.96031746 | 1.6031746 |
| A_55_P2051 | 39.7    | Detected   | 40.9    | Detected   | 59      | Detected   | 73.9    | Detected   | Pgk2     | 1.861460957 | 1.4861461  | 1.80684597 | 1.4425428 |
| A_55_P2039 | 67.8    | Detected   | 65.1    | Detected   | 88.7    | Detected   | 126.2   | Detected   | Cpt1b    | 1.861356932 | 1.30825959 | 1.93855607 | 1.3625192 |
| A_55_P2116 | 13.7    | Detected   | 34.6    | Detected   | 9.7     | Not Detect | 25.5    | Not Detect | Neb      | 1.861313869 | 0.7080292  | 0.73699422 | 0.2803468 |
| A_55_P2097 | 865.1   | Detected   | 1431.1  | Detected   | 962.5   | Detected   | 1610.2  | Detected   | Cnep1r1  | 1.861287712 | 1.11258814 | 1.12514849 | 0.6725596 |
| A_51_P1283 | 716     | Detected   | 2418.1  | Detected   | 471.2   | Detected   | 1332.4  | Detected   | Serinc5  | 1.860893855 | 0.65810056 | 0.55101112 | 0.1948637 |
| A_66_P1022 | 627.5   | Detected   | 863.9   | Detected   | 893.8   | Detected   | 1167.5  | Detected   | Ascc1    | 1.860557769 | 1.42438247 | 1.35142956 | 1.0346105 |
| A_52_P6781 | 158.3   | Detected   | 234.1   | Detected   | 161.4   | Detected   | 294.5   | Detected   | Xpr1     | 1.860391661 | 1.01958307 | 1.2580094  | 0.689449  |
| A_55_P1976 | 958.7   | Detected   | 1306.8  | Detected   | 2031.6  | Detected   | 1783.5  | Detected   | Unc13d   | 1.860331699 | 2.11911964 | 1.36478421 | 1.5546373 |
| A_51_P3440 | 926.4   | Detected   | 879.6   | Detected   | 1365.4  | Detected   | 1722.8  | Detected   | Slc25a20 | 1.859671848 | 1.47387737 | 1.95861755 | 1.5522965 |
| A_55_P1964 | 243     | Detected   | 309.9   | Detected   | 275.6   | Detected   | 451.8   | Detected   | Gm3716   | 1.859259259 | 1.13415638 | 1.45788964 | 0.8893191 |
| A_52_P4283 | 1467.7  | Detected   | 1366.5  | Detected   | 1666.2  | Detected   | 2728.6  | Detected   | Usp25    | 1.859099271 | 1.13524562 | 1.9967801  | 1.2193194 |
| A_51_P4833 | 5963.1  | Detected   | 7813.8  | Detected   | 5719.7  | Detected   | 11082.7 | Detected   | Mpv17l2  | 1.858546729 | 0.9591823  | 1.41834959 | 0.7319998 |
| A_55_P2104 | 1422.1  | Detected   | 1411.5  | Detected   | 1847    | Detected   | 2642.7  | Detected   | C87436   | 1.858308136 | 1.29878349 | 1.87226355 | 1.308537  |
| A_55_P2075 | 25.4    | Detected   | 24.9    | Detected   | 24.3    | Detected   | 47.2    | Not Detect | Has2os   | 1.858267717 | 0.95669291 | 1.89558233 | 0.9759036 |
| A_55_P1979 | 6336.1  | Detected   | 7576    | Detected   | 11543.2 | Detected   | 11774.1 | Detected   | S100a1   | 1.858256656 | 1.82181468 | 1.55413147 | 1.5236536 |
| A_55_P2046 | 57      | Detected   | 59.6    | Detected   | 82      | Detected   | 105.8   | Detected   | Adpgk    | 1.856140351 | 1.43859649 | 1.77516779 | 1.3758389 |
| A_51_P4230 | 913     | Detected   | 903.4   | Detected   | 712.2   | Detected   | 1694.3  | Detected   | Klhl7    | 1.855750274 | 0.78006572 | 1.87547044 | 0.7883551 |
| A_55_P2163 | 18      | Detected   | 13.7    | Not Detect | 21.6    | Detected   | 33.4    | Not Detect | Gm9484   | 1.855555556 | 1.2        | 2.4379562  | 1.5766423 |
| A_55_P1972 | 9       | Not Detect | 27.9    | Detected   | 11.3    | Not Detect | 16.7    | Not Detect | Fam188b  | 1.855555556 | 1.25555556 | 0.59856631 | 0.4050179 |
| A_51_P5112 | 494.8   | Detected   | 399.9   | Detected   | 407.2   | Detected   | 918.1   | Detected   | Pik3r1   | 1.855497171 | 0.82295877 | 2.29582396 | 1.0182546 |
| A_55_P1980 | 3508.8  | Detected   | 3784.2  | Detected   | 6307.8  | Detected   | 6509.1  | Detected   | Dram2    | 1.855078659 | 1.79770862 | 1.72007293 | 1.6668781 |
| A_55_P2167 | 1667.6  | Detected   | 3968    | Detected   | 2472.6  | Detected   | 3092.9  | Detected   | Klra12   | 1.854701367 | 1.48272967 | 0.77946069 | 0.6231351 |
| A_51_P2191 | 39.2    | Detected   | 40      | Detected   | 3.4     | Not Detect | 72.7    | Detected   | Mfap3l   | 1.854591837 | 0.08673469 | 1.8175     | 0.085     |
| A_52_P3573 | 60.4    | Detected   | 60.6    | Detected   | 62.1    | Detected   | 112     | Detected   | Madd     | 1.854304636 | 1.0281457  | 1.84818482 | 1.0247525 |
| A_55_P2019 | 45.2    | Detected   | 31      | Detected   | 23.3    | Detected   | 83.8    | Detected   | Oas2     | 1.853982301 | 0.51548673 | 2.70322581 | 0.7516129 |
| A_55_P2038 | 874.2   | Detected   | 1192.2  | Detected   | 795.2   | Detected   | 1620.5  | Detected   | Erich1   | 1.853694807 | 0.90963166 | 1.3592518  | 0.6670022 |
| A_55_P2026 | 142.5   | Detected   | 161.6   | Detected   | 141     | Detected   | 264.1   | Detected   | Rnf213   | 1.853333333 | 0.98947368 | 1.63428218 | 0.8725248 |
| A_55_P2008 | 9544.9  | Detected   | 11002.2 | Detected   | 11113.3 | Detected   | 17683.7 | Detected   | Larp1b   | 1.852685727 | 1.16431812 | 1.60728763 | 1.010098  |
| A_51_P4210 | 7922.9  | Detected   | 9571.1  | Detected   | 9061.5  | Detected   | 14678.3 | Detected   | Ascc3    | 1.852642341 | 1.14371001 | 1.53360638 | 0.9467564 |
| A_55_P2177 | 775.2   | Detected   | 673.8   | Detected   | 1020.8  | Detected   | 1436    | Detected   | Abcb8    | 1.852425181 | 1.31682147 | 2.1311962  | 1.5149896 |
| A_55_P1994 | 11537.2 | Detected   | 13578.1 | Detected   | 20521.1 | Detected   | 21365.8 | Detected   | Etfb     | 1.851905142 | 1.7786898  | 1.57354858 | 1.5113381 |
| A_51_P3304 | 47333.2 | Detected   | 61626.1 | Detected   | 42261.3 | Detected   | 87611.7 | Detected   | Eif4ebp1 | 1.850956622 | 0.89284688 | 1.4216655  | 0.6857695 |
| A_51_P2864 | 24.8    | Detected   | 37      | Detected   | 19.6    | Detected   | 45.9    | Not Detect | Olf434   | 1.850806452 | 0.79032258 | 1.24054054 | 0.5297297 |
| A_51_P1651 | 9684.9  | Detected   | 11072.6 | Detected   | 15501.8 | Detected   | 17923.7 | Detected   | Hibadh   | 1.850685087 | 1.60061539 | 1.61874357 | 1.4000145 |
| A_55_P2001 | 28580.6 | Detected   | 28665.9 | Detected   | 42740.7 | Detected   | 52884.8 | Detected   | Dnm2     | 1.85037403  | 1.49544446 | 1.84486794 | 1.4909945 |
| A_51_P1142 | 4729.2  | Detected   | 5467.9  | Detected   | 2866.1  | Detected   | 8750.1  | Detected   | Kifc3    | 1.850228368 | 0.60604331 | 1.60026701 | 0.5241683 |
| A_55_P2046 | 1216.6  | Detected   | 1046.6  | Detected   | 2231.6  | Detected   | 2250.6  | Detected   | Nbeal2   | 1.849909584 | 1.83429229 | 2.15039174 | 2.1322377 |

|            |         |          |         |          |         |          |         |            |               |             |            |            |           |
|------------|---------|----------|---------|----------|---------|----------|---------|------------|---------------|-------------|------------|------------|-----------|
| A_55_P2003 | 13730.2 | Detected | 21140.7 | Detected | 15367.7 | Detected | 25398.7 | Detected   | Tmem192       | 1.849841954 | 1.11926265 | 1.20141244 | 0.7269248 |
| A_55_P1961 | 5423.4  | Detected | 5115.3  | Detected | 7367.6  | Detected | 10032   | Detected   | Map3k1        | 1.849762142 | 1.35848361 | 1.9611753  | 1.4403065 |
| A_51_P4885 | 2739.3  | Detected | 3469.5  | Detected | 4411.1  | Detected | 5065.9  | Detected   | 3010026O09Rik | 1.849341073 | 1.6103019  | 1.46012394 | 1.2713936 |
| A_51_P4921 | 10725.2 | Detected | 17548   | Detected | 11201.7 | Detected | 19834.5 | Detected   | Ciapi1        | 1.849336143 | 1.04442808 | 1.13029975 | 0.6383463 |
| A_55_P2027 | 4486.3  | Detected | 8588.6  | Detected | 6051.5  | Detected | 8296.6  | Detected   | Tnfrsf10b     | 1.849319038 | 1.34888438 | 0.96600144 | 0.7045968 |
| A_55_P2171 | 291.6   | Detected | 358.1   | Detected | 312.5   | Detected | 538.9   | Detected   | Bin3          | 1.848079561 | 1.07167353 | 1.5048869  | 0.8726613 |
| A_52_P5976 | 137.2   | Detected | 185.3   | Detected | 199.6   | Detected | 253.5   | Detected   | Stk16         | 1.847667638 | 1.4548105  | 1.36805181 | 1.0771722 |
| A_55_P2001 | 134.5   | Detected | 379.9   | Detected | 150.1   | Detected | 248.4   | Detected   | Gm5478        | 1.846840149 | 1.11598513 | 0.65385628 | 0.395104  |
| A_51_P2061 | 64.3    | Detected | 56.7    | Detected | 115.2   | Detected | 118.7   | Detected   | Akna          | 1.846034215 | 1.79160187 | 2.09347443 | 2.031746  |
| A_51_P1247 | 3463.7  | Detected | 5272.6  | Detected | 3638.4  | Detected | 6393.2  | Detected   | Tmem192       | 1.845771862 | 1.05043739 | 1.21253272 | 0.690058  |
| A_55_P2173 | 295.3   | Detected | 449.6   | Detected | 58.4    | Detected | 545     | Detected   | Gm16340       | 1.845580765 | 0.19776498 | 1.21218861 | 0.1298932 |
| A_55_P2347 | 423.3   | Detected | 416.6   | Detected | 377.4   | Detected | 781.1   | Detected   | AU040972      | 1.845263407 | 0.89156627 | 1.87493999 | 0.9059049 |
| A_55_P1980 | 21.3    | Detected | 23.7    | Detected | 29.1    | Detected | 39.3    | Not Detect | Olf1r536      | 1.845070423 | 1.36619718 | 1.65822785 | 1.2278481 |
| A_66_P1210 | 20      | Detected | 31.5    | Detected | 24      | Detected | 36.9    | Not Detect | Sftpd         | 1.845       | 1.2        | 1.17142857 | 0.7619048 |
| A_51_P3346 | 61.9    | Detected | 84.3    | Detected | 141.8   | Detected | 114.2   | Detected   | Uts2          | 1.844911147 | 2.2907916  | 1.35468565 | 1.6820878 |
| A_51_P1908 | 22973.1 | Detected | 28090.6 | Detected | 23668   | Detected | 42367.6 | Detected   | Ap1m1         | 1.844226508 | 1.03024842 | 1.50824831 | 0.8425594 |
| A_55_P2167 | 1496.5  | Detected | 2298    | Detected | 1834.9  | Detected | 2759.1  | Detected   | Zfand1        | 1.843701971 | 1.22612763 | 1.20065274 | 0.7984769 |
| A_52_P5394 | 176.3   | Detected | 206.9   | Detected | 175     | Detected | 325     | Detected   | Lbh           | 1.843448667 | 0.99262621 | 1.57080715 | 0.8458192 |
| A_55_P2181 | 51.1    | Detected | 48      | Detected | 66.8    | Detected | 94.2    | Detected   | Nipal3        | 1.843444227 | 1.3072407  | 1.9625     | 1.3916667 |
| A_51_P2765 | 6731.1  | Detected | 4791.5  | Detected | 6875    | Detected | 12404.4 | Detected   | AU040320      | 1.842848866 | 1.02137838 | 2.58883439 | 1.4348325 |
| A_55_P2035 | 29455   | Detected | 28044.1 | Detected | 61206.5 | Detected | 54277.7 | Detected   | Fam63a        | 1.842732983 | 2.07796639 | 1.93544097 | 2.182509  |
| A_52_P6613 | 677     | Detected | 1081.1  | Detected | 1276.8  | Detected | 1247    | Detected   | Myo5b         | 1.841949778 | 1.8859675  | 1.15345481 | 1.1810193 |
| A_55_P2061 | 82.1    | Detected | 73.5    | Detected | 89.1    | Detected | 151.2   | Detected   | Zfp456        | 1.841656516 | 1.08526188 | 2.05714286 | 1.2122449 |
| A_52_P4945 | 163.8   | Detected | 188.7   | Detected | 142.7   | Detected | 301.6   | Detected   | Insr          | 1.841269841 | 0.87118437 | 1.59830419 | 0.7562268 |
| A_55_P2058 | 3844.1  | Detected | 3243.7  | Detected | 3118.7  | Detected | 7077.5  | Detected   | Kif1b         | 1.841133165 | 0.81129523 | 2.18192188 | 0.9614638 |
| A_55_P1973 | 15.1    | Detected | 24.9    | Detected | 25.1    | Detected | 27.8    | Not Detect | Tmem163       | 1.841059603 | 1.66225166 | 1.11646586 | 1.0080321 |
| A_52_P1400 | 1242.6  | Detected | 1473.6  | Detected | 749.8   | Detected | 2287.5  | Detected   | Nipal1        | 1.840898117 | 0.6034122  | 1.55232085 | 0.5088219 |
| A_55_P1979 | 6363.2  | Detected | 7087.5  | Detected | 11345.3 | Detected | 11713.6 | Detected   | S100a1        | 1.8408348   | 1.78295512 | 1.65271252 | 1.6007478 |
| A_51_P4113 | 525.1   | Detected | 543.1   | Detected | 3846.8  | Detected | 966.6   | Detected   | Mogat2        | 1.84079223  | 7.3258427  | 1.77978273 | 7.0830418 |
| A_52_P4584 | 200.6   | Detected | 186.2   | Detected | 254.6   | Detected | 369.2   | Detected   | Gorasp1       | 1.840478564 | 1.26919242 | 1.98281418 | 1.3673469 |
| A_55_P2097 | 3141.2  | Detected | 3755    | Detected | 5473.1  | Detected | 5781    | Detected   | Rbpms         | 1.840379473 | 1.74235961 | 1.53954727 | 1.4575499 |
| A_52_P6609 | 64.5    | Detected | 117.7   | Detected | 57.1    | Detected | 118.7   | Detected   | Ctsf          | 1.840310078 | 0.88527132 | 1.00849618 | 0.4851317 |
| A_55_P2019 | 37.5    | Detected | 41      | Detected | 26.4    | Detected | 69      | Detected   | Tagap1        | 1.84        | 0.704      | 1.68292683 | 0.6439024 |
| A_55_P2130 | 80      | Detected | 83.1    | Detected | 578.5   | Detected | 147.2   | Detected   | Ppp2r2b       | 1.84        | 7.23125    | 1.77135981 | 6.9614922 |
| A_55_P2082 | 33.7    | Detected | 32.3    | Detected | 27.6    | Detected | 62      | Detected   | 2610206C17Rik | 1.839762611 | 0.8189911  | 1.91950464 | 0.8544892 |
| A_52_P2330 | 3735.3  | Detected | 3691.6  | Detected | 5570.6  | Detected | 6871.8  | Detected   | 5730508B09Rik | 1.839691591 | 1.49133938 | 1.86146928 | 1.5089934 |
| A_52_P4113 | 2304.3  | Detected | 3260.1  | Detected | 2363.5  | Detected | 4237.8  | Detected   | Vac14         | 1.839083453 | 1.0256911  | 1.29989878 | 0.7249778 |
| A_51_P2454 | 8613.2  | Detected | 13829   | Detected | 9900.9  | Detected | 15836.6 | Detected   | Ufsp2         | 1.838643013 | 1.14950309 | 1.14517319 | 0.715952  |
| A_55_P2012 | 123.8   | Detected | 119.5   | Detected | 135.8   | Detected | 227.6   | Detected   | Sox1          | 1.838449111 | 1.09693053 | 1.90460251 | 1.1364017 |
| A_55_P1984 | 79      | Detected | 86.7    | Detected | 102.3   | Detected | 145.2   | Detected   | Rhox2h        | 1.837974684 | 1.29493671 | 1.67474048 | 1.1799308 |

|            |         |            |         |            |         |            |         |            |               |             |            |            |           |
|------------|---------|------------|---------|------------|---------|------------|---------|------------|---------------|-------------|------------|------------|-----------|
| A_55_P1966 | 370.1   | Detected   | 557     | Detected   | 687.3   | Detected   | 680.2   | Detected   | LOC547349     | 1.837881654 | 1.85706566 | 1.22118492 | 1.2339318 |
| A_51_P3066 | 15476.9 | Detected   | 16383.7 | Detected   | 18779.5 | Detected   | 28438.1 | Detected   | Naa38         | 1.837454529 | 1.21338899 | 1.73575566 | 1.1462307 |
| A_52_P3506 | 5210.1  | Detected   | 4601    | Detected   | 10516   | Detected   | 9569.3  | Detected   | Tm7sf2        | 1.836682597 | 2.01838736 | 2.07983047 | 2.2855901 |
| A_51_P4141 | 12.8    | Not Detect | 18.3    | Not Detect | 19      | Detected   | 23.5    | Not Detect | Rab19         | 1.8359375   | 1.484375   | 1.28415301 | 1.0382514 |
| A_55_P2027 | 36.5    | Detected   | 46.8    | Detected   | 42.8    | Detected   | 67      | Detected   | Prdm9         | 1.835616438 | 1.17260274 | 1.43162393 | 0.9145299 |
| A_55_P2240 | 17      | Detected   | 9.5     | Not Detect | 7.4     | Not Detect | 31.2    | Not Detect | Gm20740       | 1.835294118 | 0.43529412 | 3.28421053 | 0.7789474 |
| A_55_P2104 | 214.7   | Detected   | 309.2   | Detected   | 232.7   | Detected   | 393.9   | Detected   | Inadl         | 1.834653004 | 1.08383791 | 1.27393273 | 0.7525873 |
| A_51_P3485 | 1057    | Detected   | 1235.2  | Detected   | 1108.1  | Detected   | 1938    | Detected   | Slc38a7       | 1.833491012 | 1.04834437 | 1.56897668 | 0.8971017 |
| A_52_P1690 | 112.3   | Detected   | 197.3   | Detected   | 187     | Detected   | 205.9   | Detected   | Dbil5         | 1.833481745 | 1.66518255 | 1.04358844 | 0.9477952 |
| A_51_P4344 | 1030.9  | Detected   | 1540.5  | Detected   | 1181.8  | Detected   | 1890.1  | Detected   | Rwdd4a        | 1.833446503 | 1.14637695 | 1.22693931 | 0.7671535 |
| A_52_P1512 | 448.5   | Detected   | 573.6   | Detected   | 346.8   | Detected   | 822.3   | Detected   | Lrch4         | 1.833444816 | 0.77324415 | 1.43357741 | 0.6046025 |
| A_55_P2005 | 13.2    | Not Detect | 18.6    | Detected   | 41.2    | Detected   | 24.2    | Not Detect | Sult1a1       | 1.833333333 | 3.12121212 | 1.30107527 | 2.2150538 |
| A_51_P2081 | 54.6    | Detected   | 74.9    | Detected   | 61.2    | Detected   | 100.1   | Detected   | Pmel          | 1.833333333 | 1.12087912 | 1.3364486  | 0.8170895 |
| A_55_P2277 | 83.3    | Detected   | 237.5   | Detected   | 263.9   | Detected   | 152.7   | Detected   | 9330179D12Rik | 1.833133253 | 3.16806723 | 0.64294737 | 1.1111579 |
| A_51_P1549 | 6794.3  | Detected   | 8932.2  | Detected   | 7288.8  | Detected   | 12451.5 | Detected   | Zdhc7         | 1.832639124 | 1.0727816  | 1.39400148 | 0.816014  |
| A_55_P2212 | 20.9    | Detected   | 18      | Detected   | 23.7    | Detected   | 38.3    | Not Detect | 4930539J05Rik | 1.832535885 | 1.13397129 | 2.12777778 | 1.3166667 |
| A_55_P1972 | 151.1   | Detected   | 195.9   | Detected   | 197.4   | Detected   | 276.8   | Detected   | Fam160b2      | 1.831899404 | 1.30641959 | 1.4129658  | 1.007657  |
| A_55_P2022 | 252.6   | Detected   | 267.6   | Detected   | 292.4   | Detected   | 462.7   | Detected   | Rfwd2         | 1.831749802 | 1.15756136 | 1.72907324 | 1.0926756 |
| A_52_P5083 | 608.6   | Detected   | 659.1   | Detected   | 809     | Detected   | 1114.8  | Detected   | Erlec1        | 1.831744988 | 1.32928032 | 1.69139736 | 1.2274313 |
| A_52_P5626 | 19.6    | Detected   | 29.4    | Detected   | 39.6    | Detected   | 35.9    | Not Detect | Pkhd111       | 1.831632653 | 2.02040816 | 1.22108844 | 1.3469388 |
| A_55_P2181 | 143.6   | Detected   | 329.3   | Detected   | 212.1   | Detected   | 263     | Detected   | Slc45a3       | 1.831476323 | 1.4770195  | 0.79866383 | 0.6440935 |
| A_55_P2105 | 193.3   | Detected   | 215     | Detected   | 317.4   | Detected   | 354     | Detected   | Foxp1         | 1.831350233 | 1.64200724 | 1.64651163 | 1.4762791 |
| A_51_P1281 | 10060   | Detected   | 12657.2 | Detected   | 10509.9 | Detected   | 18412.3 | Detected   | Chmp1a        | 1.830248509 | 1.04472167 | 1.45468982 | 0.8303495 |
| A_51_P4094 | 23686.9 | Detected   | 27693.1 | Detected   | 26749.6 | Detected   | 43350.4 | Detected   | Aars          | 1.830142399 | 1.12929932 | 1.56538632 | 0.9659301 |
| A_55_P2076 | 5285.1  | Detected   | 3265.1  | Detected   | 7443.8  | Detected   | 9671.5  | Detected   | Ehd2          | 1.829955914 | 1.40845017 | 2.96208386 | 2.2798077 |
| A_55_P2178 | 4.7     | Not Detect | 5       | Not Detect | 31.5    | Detected   | 8.6     | Not Detect | Gkn1          | 1.829787234 | 6.70212766 | 1.72       | 6.3       |
| A_55_P2155 | 143.8   | Detected   | 145.3   | Detected   | 204.1   | Detected   | 263.1   | Detected   | Ssbp1         | 1.829624478 | 1.41933241 | 1.81073641 | 1.40468   |
| A_66_P1168 | 97.8    | Detected   | 174.5   | Detected   | 137.9   | Detected   | 178.9   | Detected   | 5031434O11Rik | 1.829243354 | 1.41002045 | 1.0252149  | 0.7902579 |
| A_55_P1976 | 635.9   | Detected   | 744.4   | Detected   | 679.8   | Detected   | 1163.1  | Detected   | Cnih2         | 1.829061173 | 1.06903601 | 1.56246642 | 0.9132187 |
| A_55_P1994 | 12997.7 | Detected   | 5642.3  | Detected   | 51091.3 | Detected   | 23748   | Detected   | Zfpm1         | 1.827092486 | 3.93079545 | 4.20892189 | 9.0550485 |
| A_55_P2087 | 5.2     | Not Detect | 20.6    | Detected   | 3.5     | Not Detect | 9.5     | Not Detect | Dsg3          | 1.826923077 | 0.67307692 | 0.46116505 | 0.1699029 |
| A_55_P2085 | 4156.2  | Detected   | 5476.2  | Detected   | 3726.5  | Detected   | 7592.8  | Detected   | Dot1l         | 1.826861075 | 0.89661229 | 1.38650889 | 0.6804901 |
| A_55_P2238 | 11.5    | Not Detect | 35.7    | Detected   | 10      | Not Detect | 21      | Not Detect | Cwh43         | 1.826086957 | 0.86956522 | 0.58823529 | 0.280112  |
| A_55_P2183 | 4358.9  | Detected   | 3309.5  | Detected   | 8525.4  | Detected   | 7955.1  | Detected   | Cryz1l        | 1.825024662 | 1.95586042 | 2.40371657 | 2.5760387 |
| A_55_P2048 | 203.7   | Detected   | 310.7   | Detected   | 271.2   | Detected   | 371.7   | Detected   | 4931440P22Rik | 1.824742268 | 1.33136966 | 1.19633087 | 0.8728677 |
| A_55_P2175 | 2672.2  | Detected   | 2945.3  | Detected   | 3766.9  | Detected   | 4875.9  | Detected   | Ei24          | 1.824676297 | 1.40966245 | 1.65548501 | 1.2789529 |
| A_52_P6334 | 15.4    | Detected   | 11.6    | Not Detect | 3.4     | Not Detect | 28.1    | Not Detect | C1qtnf4       | 1.824675325 | 0.22077922 | 2.42241379 | 0.2931034 |
| A_55_P2165 | 4402.2  | Detected   | 5529.2  | Detected   | 5185.4  | Detected   | 8031.2  | Detected   | 2300005B03Rik | 1.824360547 | 1.17791104 | 1.45250669 | 0.937821  |
| A_55_P2050 | 128.6   | Detected   | 189.1   | Detected   | 159.8   | Detected   | 234.6   | Detected   | Hemt1         | 1.824261275 | 1.24261275 | 1.24061343 | 0.8450555 |
| A_55_P2117 | 343.3   | Detected   | 645.7   | Detected   | 177.1   | Detected   | 626.2   | Detected   | Pax9          | 1.824060588 | 0.51587533 | 0.96980022 | 0.274276  |

|            |          |            |         |            |          |          |          |            |               |             |            |            |           |
|------------|----------|------------|---------|------------|----------|----------|----------|------------|---------------|-------------|------------|------------|-----------|
| A_55_P2011 | 997.5    | Detected   | 413.7   | Detected   | 494.2    | Detected | 1819     | Detected   | Tifa          | 1.823558897 | 0.4954386  | 4.39690597 | 1.1945854 |
| A_55_P2128 | 147119.8 | Detected   | 144710  | Detected   | 218730.1 | Detected | 268203.5 | Detected   | Krt8          | 1.8230279   | 1.48674821 | 1.85338608 | 1.5115065 |
| A_55_P2073 | 2757.8   | Detected   | 2071    | Detected   | 3744.4   | Detected | 5026.3   | Detected   | Abcc5         | 1.822575966 | 1.35774893 | 2.42699179 | 1.8080155 |
| A_52_P4435 | 153      | Detected   | 167.4   | Detected   | 141      | Detected | 278.8    | Detected   | Gdpgp1        | 1.822222222 | 0.92156863 | 1.66547192 | 0.8422939 |
| A_51_P2504 | 1189.8   | Detected   | 1463.1  | Detected   | 1094.2   | Detected | 2167.4   | Detected   | Zfp276        | 1.821650698 | 0.91965036 | 1.48137516 | 0.7478641 |
| A_51_P2115 | 248.8    | Detected   | 354.3   | Detected   | 276.1    | Detected | 453.2    | Detected   | Muc20         | 1.821543408 | 1.10972669 | 1.27914197 | 0.7792831 |
| A_55_P2371 | 139.5    | Detected   | 127.7   | Detected   | 301.3    | Detected | 254.1    | Detected   | 4930413E15Rik | 1.821505376 | 2.15985663 | 1.98981989 | 2.3594362 |
| A_55_P2084 | 4728.4   | Detected   | 5080.4  | Detected   | 4591.6   | Detected | 8611.7   | Detected   | Sec31a        | 1.821271466 | 0.97106844 | 1.69508306 | 0.9037871 |
| A_51_P3512 | 3396.6   | Detected   | 3663.1  | Detected   | 4199.6   | Detected | 6185.9   | Detected   | Pcsk7         | 1.821203556 | 1.23641288 | 1.68870629 | 1.1464606 |
| A_51_P2222 | 160.2    | Detected   | 139.8   | Detected   | 260.9    | Detected | 291.7    | Detected   | Ikbke         | 1.820848939 | 1.62858926 | 2.08655222 | 1.8662375 |
| A_52_P4699 | 215.9    | Detected   | 219.2   | Detected   | 223.4    | Detected | 393.1    | Detected   | Zc3h6         | 1.820750347 | 1.0347383  | 1.79333942 | 1.0191606 |
| A_55_P2033 | 148.5    | Detected   | 165.9   | Detected   | 174.3    | Detected | 270.3    | Detected   | Mmab          | 1.82020202  | 1.17373737 | 1.62929476 | 1.0506329 |
| A_52_P3164 | 23687.3  | Detected   | 32271.3 | Detected   | 22999.6  | Detected | 43102    | Detected   | Lamtor4       | 1.819624862 | 0.97096756 | 1.335614   | 0.7126952 |
| A_51_P4328 | 916      | Detected   | 765.9   | Detected   | 1571.2   | Detected | 1666.6   | Detected   | Dhrs11        | 1.819432314 | 1.71528384 | 2.17600209 | 2.0514427 |
| A_52_P1482 | 269      | Detected   | 335     | Detected   | 284.9    | Detected | 489.4    | Detected   | D030028A08Rik | 1.819330855 | 1.05910781 | 1.46089552 | 0.8504478 |
| A_55_P1995 | 202.3    | Detected   | 134.1   | Detected   | 170.2    | Detected | 368      | Detected   | Casz1         | 1.819080573 | 0.84132477 | 2.74422073 | 1.2692021 |
| A_55_P2064 | 1440.1   | Detected   | 3104.8  | Detected   | 3004     | Detected | 2618.9   | Detected   | Msra          | 1.818554267 | 2.08596625 | 0.84350039 | 0.9675341 |
| A_51_P4726 | 298      | Detected   | 287.5   | Detected   | 237.5    | Detected | 541.9    | Detected   | Zfp719        | 1.818456376 | 0.79697987 | 1.88486957 | 0.826087  |
| A_55_P2006 | 53.4     | Detected   | 50.7    | Detected   | 111.4    | Detected | 97.1     | Detected   | Sapcd2        | 1.81835206  | 2.08614232 | 1.91518738 | 2.1972387 |
| A_51_P4326 | 2374.9   | Detected   | 2859.2  | Detected   | 4513.4   | Detected | 4318.4   | Detected   | Pex7          | 1.818350246 | 1.90045897 | 1.51035255 | 1.5785534 |
| A_55_P2139 | 3568.4   | Detected   | 3436    | Detected   | 1993.8   | Detected | 6485     | Detected   | Trim56        | 1.817341105 | 0.55873781 | 1.88736903 | 0.5802678 |
| A_55_P2405 | 64.6     | Detected   | 68.2    | Detected   | 85.6     | Detected | 117.4    | Detected   | 1700061N14Rik | 1.817337461 | 1.3250774  | 1.72140762 | 1.255132  |
| A_55_P1956 | 407.4    | Detected   | 536.2   | Detected   | 427.4    | Detected | 740.3    | Detected   | Smco1         | 1.817133039 | 1.0490918  | 1.38064155 | 0.7970906 |
| A_55_P2169 | 4.9      | Not Detect | 3.2     | Not Detect | 33.4     | Detected | 8.9      | Not Detect | Olf1474       | 1.816326531 | 6.81632653 | 2.78125    | 10.4375   |
| A_55_P2076 | 740.4    | Detected   | 956.6   | Detected   | 676.8    | Detected | 1344.6   | Detected   | Nrd1          | 1.816045381 | 0.91410049 | 1.40560318 | 0.7075057 |
| A_55_P1982 | 97.7     | Detected   | 118.8   | Detected   | 177.4    | Detected | 177.4    | Detected   | Gm9937        | 1.815762538 | 1.81576254 | 1.49326599 | 1.493266  |
| A_55_P2006 | 29.3     | Detected   | 36.3    | Detected   | 30.6     | Detected | 53.2     | Detected   | Pstpip2       | 1.815699659 | 1.0443686  | 1.46556474 | 0.8429752 |
| A_55_P1971 | 35.7     | Detected   | 53.2    | Detected   | 27.4     | Detected | 64.8     | Detected   | Zfp819        | 1.81512605  | 0.767507   | 1.21804511 | 0.5150376 |
| A_55_P2010 | 14.6     | Detected   | 3.1     | Not Detect | 53.7     | Detected | 26.5     | Not Detect | Serpina1d     | 1.815068493 | 3.67808219 | 8.5483871  | 17.322581 |
| A_51_P4071 | 1015.4   | Detected   | 1170.9  | Detected   | 1099.2   | Detected | 1842.9   | Detected   | Abhd5         | 1.814949773 | 1.08252905 | 1.5739175  | 0.9387651 |
| A_52_P5332 | 18.9     | Detected   | 18.3    | Detected   | 24.2     | Detected | 34.3     | Not Detect | Spata31d1d    | 1.814814815 | 1.28042328 | 1.87431694 | 1.3224044 |
| A_55_P1983 | 67.4     | Detected   | 57.9    | Detected   | 62       | Detected | 122.3    | Detected   | Zbtb11        | 1.814540059 | 0.91988131 | 2.11226252 | 1.0708117 |
| A_55_P2114 | 6932.4   | Detected   | 11077.1 | Detected   | 6964.4   | Detected | 12577.2  | Detected   | Gtf2e2        | 1.814263459 | 1.00461601 | 1.13542353 | 0.6287205 |
| A_55_P2158 | 152.8    | Detected   | 259.3   | Detected   | 232.6    | Detected | 277.2    | Detected   | Xpot          | 1.814136126 | 1.52225131 | 1.06903201 | 0.8970305 |
| A_52_P4014 | 85.5     | Detected   | 94.5    | Detected   | 73.7     | Detected | 155.1    | Detected   | Ubxn4         | 1.814035088 | 0.8619883  | 1.64126984 | 0.7798942 |
| A_55_P1989 | 46.1     | Detected   | 41.5    | Detected   | 75.9     | Detected | 83.6     | Detected   | 4930426L09Rik | 1.813449024 | 1.64642082 | 2.01445783 | 1.8289157 |
| A_55_P2168 | 3207     | Detected   | 3976.2  | Detected   | 5006.7   | Detected | 5815.7   | Detected   | Ap5b1         | 1.813439351 | 1.56117867 | 1.46262763 | 1.259167  |
| A_55_P2104 | 75.3     | Detected   | 71.8    | Detected   | 110.1    | Detected | 136.5    | Detected   | P2rx4         | 1.812749004 | 1.46215139 | 1.90111421 | 1.5334262 |
| A_51_P4506 | 87.5     | Detected   | 103.7   | Detected   | 62.9     | Detected | 158.6    | Detected   | Tepp          | 1.812571429 | 0.71885714 | 1.52941176 | 0.6065574 |
| A_51_P4437 | 21966.8  | Detected   | 20620   | Detected   | 30256.9  | Detected | 39815.3  | Detected   | Slc35c1       | 1.812521624 | 1.37739225 | 1.93090689 | 1.4673569 |

|            |         |            |         |            |         |            |         |            |                |             |            |            |           |
|------------|---------|------------|---------|------------|---------|------------|---------|------------|----------------|-------------|------------|------------|-----------|
| A_55_P2140 | 666.6   | Detected   | 2476.7  | Detected   | 1623.5  | Detected   | 1208.2  | Detected   | Krt36          | 1.812481248 | 2.43549355 | 0.48782654 | 0.6555093 |
| A_55_P2141 | 24.5    | Detected   | 27.7    | Detected   | 35.3    | Detected   | 44.4    | Not Detect | Snrnp27        | 1.812244898 | 1.44081633 | 1.60288809 | 1.2743682 |
| A_51_P1015 | 5709.3  | Detected   | 3400.2  | Detected   | 13103.2 | Detected   | 10346.6 | Detected   | Klc4           | 1.812236176 | 2.29506244 | 3.04293865 | 3.8536557 |
| A_55_P1964 | 44.7    | Detected   | 50.9    | Detected   | 67.3    | Detected   | 81      | Detected   | 1700001G17Rik  | 1.812080537 | 1.50559284 | 1.5913556  | 1.3222004 |
| A_55_P1973 | 7423.7  | Detected   | 9432.6  | Detected   | 8349.5  | Detected   | 13451.3 | Detected   | Cmtm7          | 1.811940138 | 1.1247087  | 1.42604372 | 0.8851748 |
| A_55_P2139 | 13.8    | Not Detect | 21.5    | Detected   | 20      | Detected   | 25      | Not Detect | Cdhr3          | 1.811594203 | 1.44927536 | 1.1627907  | 0.9302326 |
| A_55_P2061 | 16.4    | Detected   | 25.2    | Detected   | 16.1    | Detected   | 29.7    | Not Detect | Opn4           | 1.81097561  | 0.98170732 | 1.17857143 | 0.6388889 |
| A_51_P3798 | 34.9    | Detected   | 59.9    | Detected   | 63.5    | Detected   | 63.2    | Detected   | Cyp4f41-ps     | 1.810888252 | 1.81948424 | 1.05509182 | 1.0601002 |
| A_55_P2449 | 1447.2  | Detected   | 1471.7  | Detected   | 1532.9  | Detected   | 2620.4  | Detected   | 1700047117Rik2 | 1.810668878 | 1.0592178  | 1.78052592 | 1.0415846 |
| A_51_P2939 | 514     | Detected   | 715.7   | Detected   | 834.4   | Detected   | 930.6   | Detected   | Ras11b         | 1.810505837 | 1.6233463  | 1.30026547 | 1.1658516 |
| A_55_P2043 | 6967.3  | Detected   | 4442.6  | Detected   | 12214   | Detected   | 12613.9 | Detected   | Llgl2          | 1.81044307  | 1.75304637 | 2.83930581 | 2.749291  |
| A_51_P3896 | 522.2   | Detected   | 649.1   | Detected   | 486.9   | Detected   | 945.4   | Detected   | Scrt2          | 1.810417465 | 0.93240138 | 1.4564782  | 0.7501155 |
| A_55_P2197 | 828.4   | Detected   | 2206.8  | Detected   | 1019.3  | Detected   | 1499.2  | Detected   | 1110046J04Rik  | 1.809753742 | 1.23044423 | 0.67935472 | 0.4618905 |
| A_55_P2450 | 64.6    | Detected   | 80.8    | Detected   | 63.4    | Detected   | 116.9   | Detected   | N4bp2l2        | 1.809597523 | 0.98142415 | 1.44678218 | 0.7846535 |
| A_52_P1234 | 43503.6 | Detected   | 58827   | Detected   | 38610.2 | Detected   | 78723.6 | Detected   | Tcf25          | 1.809588172 | 0.88751735 | 1.33822224 | 0.6563347 |
| A_66_P1373 | 118     | Detected   | 136.7   | Detected   | 136.3   | Detected   | 213.5   | Detected   | Slc16a1        | 1.809322034 | 1.15508475 | 1.56181419 | 0.9970739 |
| A_55_P2067 | 102.7   | Detected   | 127.4   | Detected   | 144.6   | Detected   | 185.8   | Detected   | Agxt2          | 1.809152872 | 1.40798442 | 1.45839874 | 1.1350078 |
| A_55_P2337 | 134     | Detected   | 94.6    | Detected   | 87.2    | Detected   | 242.4   | Detected   | Mid1           | 1.808955224 | 0.65074627 | 2.56236786 | 0.9217759 |
| A_66_P1141 | 15.7    | Detected   | 16.7    | Not Detect | 18.7    | Detected   | 28.4    | Not Detect | Gm7904         | 1.808917197 | 1.1910828  | 1.7005988  | 1.1197605 |
| A_55_P2033 | 20.4    | Detected   | 25.2    | Detected   | 26.6    | Detected   | 36.9    | Not Detect | Ddo            | 1.808823529 | 1.30392157 | 1.46428571 | 1.0555556 |
| A_55_P2150 | 575.2   | Detected   | 585.8   | Detected   | 744.9   | Detected   | 1040.4  | Detected   | Cdkl2          | 1.80876217  | 1.29502782 | 1.77603278 | 1.2715944 |
| A_55_P1957 | 4890.6  | Detected   | 6459.5  | Detected   | 2591.3  | Detected   | 8845.2  | Detected   | Snx25          | 1.80861244  | 0.52985319 | 1.36933199 | 0.4011611 |
| A_51_P2019 | 1386.8  | Detected   | 1938.4  | Detected   | 1346.1  | Detected   | 2508.1  | Detected   | 4933411K20Rik  | 1.808552062 | 0.97065186 | 1.29390219 | 0.6944387 |
| A_55_P2040 | 6775.4  | Detected   | 7477.6  | Detected   | 10183.4 | Detected   | 12252.8 | Detected   | Pradc1         | 1.808424595 | 1.50299613 | 1.63860062 | 1.3618541 |
| A_55_P2029 | 2900    | Detected   | 7976.2  | Detected   | 2820.5  | Detected   | 5244.1  | Detected   | Dus2           | 1.808310345 | 0.97258621 | 0.65746847 | 0.3536145 |
| A_51_P2945 | 8448    | Detected   | 8020.5  | Detected   | 13592.9 | Detected   | 15276.5 | Detected   | Gde1           | 1.808297822 | 1.60900805 | 1.90468175 | 1.6947697 |
| A_55_P2133 | 37.9    | Detected   | 47.2    | Detected   | 36.5    | Detected   | 68.5    | Detected   | 6430531B16Rik  | 1.807387863 | 0.96306069 | 1.45127119 | 0.7733051 |
| A_55_P2150 | 35.3    | Detected   | 64.1    | Detected   | 34      | Detected   | 63.8    | Detected   | Exoc3l         | 1.807365439 | 0.9631728  | 0.99531981 | 0.5304212 |
| A_55_P2025 | 16.6    | Detected   | 17      | Detected   | 26.1    | Detected   | 30      | Not Detect | Pnpla3         | 1.807228916 | 1.57228916 | 1.76470588 | 1.5352941 |
| A_51_P3860 | 10763.9 | Detected   | 10789.3 | Detected   | 21142   | Detected   | 19452.1 | Detected   | Ppp2r5b        | 1.807160973 | 1.96415797 | 1.80290658 | 1.959534  |
| A_51_P3654 | 6601.1  | Detected   | 8811.8  | Detected   | 10463.4 | Detected   | 11929   | Detected   | Rpusd4         | 1.807123055 | 1.58509945 | 1.35375292 | 1.1874305 |
| A_51_P5081 | 22.8    | Detected   | 23.8    | Detected   | 25.1    | Detected   | 41.2    | Not Detect | Cryga          | 1.807017544 | 1.10087719 | 1.73109244 | 1.0546218 |
| A_55_P2300 | 103.1   | Detected   | 144.2   | Detected   | 117     | Detected   | 186.3   | Detected   | D130095D21Rik  | 1.806983511 | 1.13482056 | 1.29195562 | 0.8113731 |
| A_51_P5132 | 267     | Detected   | 287.7   | Detected   | 419.1   | Detected   | 482.3   | Detected   | Zfp949         | 1.806367041 | 1.56966292 | 1.67639903 | 1.4567258 |
| A_55_P2137 | 16      | Detected   | 25.9    | Detected   | 17.8    | Not Detect | 28.9    | Not Detect | Tmpo           | 1.80625     | 1.1125     | 1.11583012 | 0.6872587 |
| A_55_P2074 | 22.7    | Detected   | 30.3    | Detected   | 22.7    | Detected   | 41      | Not Detect | LOC101055740   | 1.806167401 | 1          | 1.35313531 | 0.7491749 |
| A_55_P2058 | 121.7   | Detected   | 176.8   | Detected   | 131.1   | Detected   | 219.8   | Detected   | Olf1341        | 1.806080526 | 1.07723911 | 1.24321267 | 0.7415158 |
| A_55_P1953 | 143.5   | Detected   | 399.7   | Detected   | 134.2   | Detected   | 259.1   | Detected   | Triobp         | 1.805574913 | 0.93519164 | 0.64823618 | 0.3357518 |
| A_66_P1351 | 216.9   | Detected   | 159.1   | Detected   | 222     | Detected   | 391.6   | Detected   | Akt2           | 1.805440295 | 1.02351314 | 2.46134507 | 1.3953488 |
| A_51_P1038 | 1596.7  | Detected   | 1591.1  | Detected   | 1503.4  | Detected   | 2882.6  | Detected   | Ppp1r35        | 1.805348531 | 0.94156698 | 1.8117026  | 0.9448809 |

|            |         |            |         |            |         |          |         |            |               |             |            |            |           |
|------------|---------|------------|---------|------------|---------|----------|---------|------------|---------------|-------------|------------|------------|-----------|
| A_52_P5456 | 4491.1  | Detected   | 5252.1  | Detected   | 5864.3  | Detected | 8107.7  | Detected   | AI597468      | 1.805281557 | 1.30576028 | 1.54370633 | 1.1165629 |
| A_52_P5268 | 1372.9  | Detected   | 2030.9  | Detected   | 1645.8  | Detected | 2478.3  | Detected   | Eri1          | 1.805156967 | 1.19877631 | 1.22029642 | 0.8103796 |
| A_55_P2051 | 93.5    | Detected   | 218.9   | Detected   | 74.9    | Detected | 168.7   | Detected   | Lbx1          | 1.804278075 | 0.80106952 | 0.77067154 | 0.3421654 |
| A_55_P2106 | 110.2   | Detected   | 121.5   | Detected   | 96.3    | Detected | 198.8   | Detected   | Bglap3        | 1.80399274  | 0.8738657  | 1.63621399 | 0.7925926 |
| A_55_P1978 | 10108.7 | Detected   | 8700    | Detected   | 17035.8 | Detected | 18236   | Detected   | Abhd17c       | 1.803990622 | 1.68526121 | 2.09609195 | 1.9581379 |
| A_55_P2236 | 27.5    | Detected   | 45.8    | Detected   | 46.4    | Detected | 49.6    | Not Detect | 4930444M15Rik | 1.803636364 | 1.68727273 | 1.08296943 | 1.0131004 |
| A_55_P2044 | 195.4   | Detected   | 187.4   | Detected   | 429.2   | Detected | 352.4   | Detected   | 2810416G20Rik | 1.803480041 | 2.19651996 | 1.88046958 | 2.2902882 |
| A_51_P3947 | 5215.6  | Detected   | 7327.6  | Detected   | 4493.8  | Detected | 9401.4  | Detected   | Arhgef18      | 1.802553877 | 0.86160749 | 1.28301217 | 0.6132704 |
| A_52_P6510 | 672     | Detected   | 788.3   | Detected   | 660.4   | Detected | 1211.3  | Detected   | Smad1         | 1.802529762 | 0.9827381  | 1.53659774 | 0.8377521 |
| A_52_P5997 | 8.1     | Not Detect | 14.2    | Not Detect | 16.1    | Detected | 14.6    | Not Detect | Qrich2        | 1.802469136 | 1.98765432 | 1.02816901 | 1.1338028 |
| A_55_P2121 | 48.6    | Detected   | 37      | Detected   | 43.8    | Detected | 87.6    | Detected   | Ankfy1        | 1.802469136 | 0.90123457 | 2.36756757 | 1.1837838 |
| A_55_P2121 | 499.3   | Detected   | 560.8   | Detected   | 813.1   | Detected | 899.9   | Detected   | Lcorl         | 1.802323253 | 1.62847987 | 1.6046719  | 1.449893  |
| A_55_P2139 | 643.8   | Detected   | 754.9   | Detected   | 956.2   | Detected | 1160.1  | Detected   | Phf14         | 1.80195713  | 1.48524386 | 1.53675984 | 1.2666578 |
| A_55_P2095 | 64.1    | Detected   | 52.3    | Detected   | 87.1    | Detected | 115.5   | Detected   | 2310057B04Rik | 1.801872075 | 1.35881435 | 2.208413   | 1.665392  |
| A_52_P7720 | 3987.5  | Detected   | 4023.7  | Detected   | 5874.5  | Detected | 7182.5  | Detected   | Lrrc20        | 1.801253918 | 1.47322884 | 1.78504859 | 1.4599747 |
| A_52_P4821 | 4257.3  | Detected   | 5516.3  | Detected   | 6879.7  | Detected | 7668.2  | Detected   | Fam32a        | 1.801188547 | 1.61597726 | 1.39009844 | 1.2471584 |
| A_55_P2041 | 740.8   | Detected   | 1453.8  | Detected   | 1102.1  | Detected | 1334.2  | Detected   | Bmp2          | 1.801025918 | 1.48771598 | 0.91773284 | 0.7580823 |
| A_55_P2084 | 806.8   | Detected   | 896     | Detected   | 953.9   | Detected | 1452.8  | Detected   | Aff3          | 1.8006941   | 1.18232524 | 1.62142857 | 1.0646205 |
| A_55_P2050 | 29.6    | Detected   | 23.7    | Detected   | 24.6    | Detected | 53.3    | Detected   | Fcrlb         | 1.800675676 | 0.83108108 | 2.24894515 | 1.0379747 |
| A_55_P2380 | 315.5   | Detected   | 100.1   | Detected   | 338     | Detected | 568.1   | Detected   | AI844869      | 1.800633914 | 1.07131537 | 5.67532468 | 3.3766234 |
| A_51_P1722 | 15471.8 | Detected   | 18554.6 | Detected   | 22910.6 | Detected | 27855.3 | Detected   | Ifrd2         | 1.80039168  | 1.48079732 | 1.50126114 | 1.2347666 |
| A_52_P4962 | 762.1   | Detected   | 916.8   | Detected   | 703.4   | Detected | 1372    | Detected   | Pcsk1n        | 1.800288676 | 0.92297599 | 1.4965096  | 0.7672339 |
| A_55_P1985 | 10526.2 | Detected   | 14612.8 | Detected   | 13354.3 | Detected | 18945.3 | Detected   | Pnpla6        | 1.799823298 | 1.26867246 | 1.29648664 | 0.9138769 |
| A_52_P2468 | 1342.3  | Detected   | 1529    | Detected   | 1995.7  | Detected | 2415.8  | Detected   | Chmp3         | 1.799746703 | 1.48677643 | 1.57998692 | 1.3052322 |
| A_55_P2180 | 3245.9  | Detected   | 3841.5  | Detected   | 3761    | Detected | 5841.7  | Detected   | Ocel1         | 1.799716566 | 1.1586925  | 1.52068203 | 0.9790446 |
| A_66_P1186 | 46.9    | Detected   | 58      | Detected   | 135.6   | Detected | 84.4    | Detected   | Rorb          | 1.799573561 | 2.891258   | 1.45517241 | 2.337931  |
| A_51_P2197 | 15988.2 | Detected   | 21485.5 | Detected   | 26495.2 | Detected | 28766.6 | Detected   | H2-Q2         | 1.799239439 | 1.65717216 | 1.33888436 | 1.2331666 |
| A_55_P1962 | 20.9    | Detected   | 18.9    | Detected   | 47.9    | Detected | 37.6    | Not Detect | Trim71        | 1.799043062 | 2.29186603 | 1.98941799 | 2.5343915 |
| A_51_P3957 | 9332.8  | Detected   | 9525.5  | Detected   | 8911    | Detected | 16789.3 | Detected   | Srp72         | 1.798956369 | 0.95480456 | 1.76256364 | 0.935489  |
| A_52_P2155 | 2880.8  | Detected   | 4200.4  | Detected   | 4363.3  | Detected | 5182.4  | Detected   | C030006K11Rik | 1.798944738 | 1.514614   | 1.23378726 | 1.038782  |
| A_52_P7444 | 375.9   | Detected   | 136.1   | Detected   | 2880.4  | Detected | 676.2   | Detected   | D930028M14Rik | 1.798882682 | 7.66267624 | 4.96840558 | 21.16385  |
| A_66_P1316 | 1900.9  | Detected   | 1697.9  | Detected   | 968.9   | Detected | 3418.4  | Detected   | LOC101055828  | 1.798306066 | 0.50970593 | 2.01331056 | 0.5706461 |
| A_52_P6267 | 7824.3  | Detected   | 19354.3 | Detected   | 15304.6 | Detected | 14070.2 | Detected   | Trnt1         | 1.798269494 | 1.95603441 | 0.72698057 | 0.7907597 |
| A_55_P2175 | 20.8    | Detected   | 20.2    | Detected   | 19.5    | Detected | 37.4    | Not Detect | Ccl28         | 1.798076923 | 0.9375     | 1.85148515 | 0.9653465 |
| A_51_P2885 | 15333.4 | Detected   | 19704.5 | Detected   | 15163.9 | Detected | 27565.4 | Detected   | Tradd         | 1.797735662 | 0.9889457  | 1.39893933 | 0.7695653 |
| A_55_P1977 | 4075.3  | Detected   | 4872.9  | Detected   | 4818.4  | Detected | 7322    | Detected   | Cln3          | 1.796677545 | 1.1823424  | 1.50259599 | 0.9888157 |
| A_55_P1959 | 118.7   | Detected   | 8299.4  | Detected   | 134     | Detected | 213.2   | Detected   | Mef2b         | 1.796124684 | 1.12889638 | 0.0256886  | 0.0161457 |
| A_51_P1503 | 48315.5 | Detected   | 63248.1 | Detected   | 83976.5 | Detected | 86770.1 | Detected   | Vps28         | 1.795906076 | 1.73808612 | 1.3719005  | 1.3277316 |
| A_55_P2236 | 223.8   | Detected   | 237.9   | Detected   | 320     | Detected | 401.9   | Detected   | 4930447F24Rik | 1.795799821 | 1.42984808 | 1.68936528 | 1.345103  |
| A_55_P1956 | 174.7   | Detected   | 194.5   | Detected   | 159.9   | Detected | 313.7   | Detected   | Gm9507        | 1.795649685 | 0.91528334 | 1.61285347 | 0.822108  |

|            |                 |                  |                  |                   |               |             |            |            |           |
|------------|-----------------|------------------|------------------|-------------------|---------------|-------------|------------|------------|-----------|
| A_55_P2088 | 59.7 Detected   | 33.2 Detected    | 25.1 Detected    | 107.2 Detected    | Ucn2          | 1.795644891 | 0.42043551 | 3.22891566 | 0.7560241 |
| A_55_P2266 | 50.4 Detected   | 55.1 Detected    | 52.6 Detected    | 90.5 Detected     | Mettl21c      | 1.795634921 | 1.04365079 | 1.64246824 | 0.9546279 |
| A_52_P6147 | 2979.3 Detected | 2738.1 Detected  | 3382 Detected    | 5349.1 Detected   | Gng12         | 1.795421743 | 1.13516598 | 1.95358095 | 1.2351631 |
| A_55_P2078 | 997.4 Detected  | 1240.9 Detected  | 1111.1 Detected  | 1790.6 Detected   | Arfgap3       | 1.795267696 | 1.11399639 | 1.44298493 | 0.8953985 |
| A_51_P2725 | 3207.2 Detected | 4548.8 Detected  | 3495.6 Detected  | 5757 Detected     | Bhlhe40       | 1.795023697 | 1.08992267 | 1.26560851 | 0.7684664 |
| A_55_P2071 | 20 Detected     | 19.8 Detected    | 13.1 Not Detect  | 35.9 Not Detect   | Tln2          | 1.795       | 0.655      | 1.81313131 | 0.6616162 |
| A_55_P2112 | 55869 Detected  | 58712.1 Detected | 74348.1 Detected | 100268.7 Detected | Pcyt2         | 1.794710841 | 1.33075767 | 1.70780299 | 1.2663165 |
| A_55_P2076 | 45.3 Detected   | 50.4 Detected    | 60.3 Detected    | 81.3 Detected     | Whamm         | 1.794701987 | 1.33112583 | 1.61309524 | 1.1964286 |
| A_51_P2812 | 4324.3 Detected | 4749.8 Detected  | 6462.7 Detected  | 7760.7 Detected   | Cep57         | 1.79467197  | 1.49450778 | 1.63390037 | 1.3606257 |
| A_55_P2072 | 22.8 Detected   | 93.9 Detected    | 28.1 Detected    | 40.9 Not Detect   | Socs2         | 1.793859649 | 1.23245614 | 0.43556976 | 0.2992545 |
| A_52_P1548 | 2486.5 Detected | 2648.9 Detected  | 3850 Detected    | 4459.8 Detected   | Ankrd49       | 1.79360547  | 1.54836115 | 1.68364227 | 1.4534335 |
| A_55_P2141 | 281.9 Detected  | 222.5 Detected   | 279.3 Detected   | 505.5 Detected    | Synj2bp       | 1.793189074 | 0.99077687 | 2.27191011 | 1.2552809 |
| A_55_P1961 | 20.3 Detected   | 35.3 Detected    | 34.7 Detected    | 36.4 Not Detect   | H19           | 1.793103448 | 1.70935961 | 1.03116147 | 0.9830028 |
| A_55_P2161 | 375.9 Detected  | 635 Detected     | 328.7 Detected   | 673.7 Detected    | Pdlim7        | 1.792231977 | 0.87443469 | 1.06094488 | 0.5176378 |
| A_52_P3576 | 118.4 Detected  | 198.8 Detected   | 206.3 Detected   | 212.2 Detected    | Neu3          | 1.79222973  | 1.74239865 | 1.06740443 | 1.0377264 |
| A_66_P1170 | 1123.6 Detected | 1096.1 Detected  | 978.7 Detected   | 2013.4 Detected   | Aasdh         | 1.791918832 | 0.87103952 | 1.8368762  | 0.892893  |
| A_55_P2021 | 221.4 Detected  | 222 Detected     | 260.3 Detected   | 396.7 Detected    | Gm7467        | 1.791779584 | 1.17570009 | 1.78693694 | 1.1725225 |
| A_51_P3794 | 855.4 Detected  | 1105.5 Detected  | 1203.4 Detected  | 1532.6 Detected   | Cuedc1        | 1.791676409 | 1.40682722 | 1.38634102 | 1.0885572 |
| A_51_P1838 | 90 Detected     | 236.8 Detected   | 185.3 Detected   | 161.2 Detected    | Fbxo15        | 1.791111111 | 2.05888889 | 0.68074324 | 0.7825169 |
| A_55_P1984 | 8.6 Not Detect  | 5.5 Not Detect   | 43.6 Detected    | 15.4 Not Detect   | Mst1          | 1.790697674 | 5.06976744 | 2.8        | 7.9272727 |
| A_55_P2152 | 12.4 Not Detect | 19.3 Detected    | 3.7 Not Detect   | 22.2 Not Detect   | Zic4          | 1.790322581 | 0.2983871  | 1.15025907 | 0.1917098 |
| A_55_P2049 | 1493.7 Detected | 1967.8 Detected  | 2700.6 Detected  | 2673.9 Detected   | Sh3bp5        | 1.790118498 | 1.80799357 | 1.35882712 | 1.3723956 |
| A_55_P2045 | 513 Detected    | 484 Detected     | 605.3 Detected   | 918.3 Detected    | Sirt7         | 1.79005848  | 1.17992203 | 1.89731405 | 1.2506198 |
| A_55_P2262 | 5.7 Not Detect  | 3.6 Not Detect   | 18.8 Detected    | 10.2 Not Detect   | 1700026H06Rik | 1.789473684 | 3.29824561 | 2.83333333 | 5.2222222 |
| A_55_P2098 | 315.5 Detected  | 338.3 Detected   | 521.8 Detected   | 564.5 Detected    | 2610318N02Rik | 1.789223455 | 1.65388273 | 1.6686373  | 1.542418  |
| A_51_P4059 | 2619.2 Detected | 3704.5 Detected  | 3460.7 Detected  | 4686 Detected     | Fig4          | 1.789095907 | 1.32128131 | 1.26494804 | 0.9341881 |
| A_51_P3126 | 28.9 Detected   | 39 Detected      | 37 Detected      | 51.7 Detected     | Hist1h1t      | 1.788927336 | 1.28027682 | 1.32564103 | 0.9487179 |
| A_52_P3478 | 20.8 Detected   | 16.2 Not Detect  | 37.5 Detected    | 37.2 Not Detect   | Sost          | 1.788461538 | 1.80288462 | 2.2962963  | 2.3148148 |
| A_55_P2099 | 5.2 Not Detect  | 17.5 Detected    | 12.2 Not Detect  | 9.3 Not Detect    | Nefh          | 1.788461538 | 2.34615385 | 0.53142857 | 0.6971429 |
| A_55_P2182 | 1316.9 Detected | 3820.7 Detected  | 2223.3 Detected  | 2355 Detected     | Sgcb          | 1.788290683 | 1.68828309 | 0.6163792  | 0.5819091 |
| A_51_P4699 | 829.9 Detected  | 934.6 Detected   | 939.1 Detected   | 1484.1 Detected   | Ggps1         | 1.788287746 | 1.13158212 | 1.58795207 | 1.0048149 |
| A_55_P2069 | 2498.9 Detected | 2545.4 Detected  | 2376 Detected    | 4468.5 Detected   | Galnt12       | 1.788186802 | 0.95081836 | 1.75551976 | 0.9334486 |
| A_55_P2111 | 5518.7 Detected | 7511.4 Detected  | 15289.8 Detected | 9868 Detected     | Egfl7         | 1.78810227  | 2.77054379 | 1.31373645 | 2.035546  |
| A_55_P2109 | 97.2 Detected   | 97.9 Detected    | 94.8 Detected    | 173.8 Detected    | Tmem61        | 1.788065844 | 0.97530864 | 1.7752809  | 0.968335  |
| A_55_P2081 | 4605.7 Detected | 5766.4 Detected  | 5898 Detected    | 8235.1 Detected   | Focad         | 1.788023536 | 1.2805871  | 1.42811806 | 1.0228219 |
| A_55_P2173 | 314.8 Detected  | 324.7 Detected   | 474.3 Detected   | 562.8 Detected    | Kank3         | 1.787801779 | 1.5066709  | 1.73329227 | 1.460733  |
| A_52_P5263 | 40 Detected     | 75.4 Detected    | 52 Detected      | 71.5 Detected     | Atl1          | 1.7875      | 1.3        | 0.94827586 | 0.6896552 |
| A_51_P2322 | 1564 Detected   | 1921 Detected    | 77.7 Detected    | 2795.6 Detected   | Hoxb6         | 1.787468031 | 0.04968031 | 1.45528371 | 0.0404477 |
| A_51_P3286 | 3606.6 Detected | 4565.6 Detected  | 4699.5 Detected  | 6443.5 Detected   | Ncbp1         | 1.786585704 | 1.30302778 | 1.41131505 | 1.029328  |
| A_55_P2102 | 12547 Detected  | 17190.9 Detected | 12283.2 Detected | 22416.2 Detected  | Yif1b         | 1.786578465 | 0.97897505 | 1.30395733 | 0.7145176 |

|            |         |          |         |            |         |          |         |            |               |             |            |            |           |
|------------|---------|----------|---------|------------|---------|----------|---------|------------|---------------|-------------|------------|------------|-----------|
| A_55_P2151 | 135.4   | Detected | 255.6   | Detected   | 284     | Detected | 241.9   | Detected   | Hbs1l         | 1.786558346 | 2.09748892 | 0.94640063 | 1.1111111 |
| A_55_P2127 | 43.1    | Detected | 40.2    | Detected   | 44.8    | Detected | 77      | Detected   | Acsbg1        | 1.786542923 | 1.03944316 | 1.91542289 | 1.1144279 |
| A_55_P2098 | 2166.4  | Detected | 2875.7  | Detected   | 2843    | Detected | 3869.6  | Detected   | Itgb3bp       | 1.786189069 | 1.31231536 | 1.3456202  | 0.9886289 |
| A_55_P2038 | 28.9    | Detected | 39.6    | Detected   | 36      | Detected | 51.6    | Detected   | 4931440P22Rik | 1.785467128 | 1.24567474 | 1.3030303  | 0.9090909 |
| A_55_P2152 | 261.9   | Detected | 429.1   | Detected   | 331.7   | Detected | 467.6   | Detected   | Wwox          | 1.78541428  | 1.26651394 | 1.08972268 | 0.7730133 |
| A_51_P3361 | 7241    | Detected | 14814   | Detected   | 9160.8  | Detected | 12927.6 | Detected   | Man2b1        | 1.785333517 | 1.26512913 | 0.872661   | 0.618388  |
| A_52_P3787 | 169.9   | Detected | 242.8   | Detected   | 168.6   | Detected | 303.3   | Detected   | Primpol       | 1.785167746 | 0.99234844 | 1.24917628 | 0.6943987 |
| A_55_P2180 | 2498.9  | Detected | 2530.9  | Detected   | 1957.7  | Detected | 4460.3  | Detected   | Tmco4         | 1.784905358 | 0.78342471 | 1.76233751 | 0.7735193 |
| A_55_P2109 | 593.2   | Detected | 1477.9  | Detected   | 1202.5  | Detected | 1058.8  | Detected   | Trnt1         | 1.784895482 | 2.02714093 | 0.71642195 | 0.8136545 |
| A_52_P3077 | 1046.6  | Detected | 1841.5  | Detected   | 1042.7  | Detected | 1868    | Detected   | Sox2          | 1.784827059 | 0.99627365 | 1.01439044 | 0.5662232 |
| A_51_P3021 | 326.8   | Detected | 492.3   | Detected   | 276.1   | Detected | 583.2   | Detected   | Cobl          | 1.784577723 | 0.84485924 | 1.18464351 | 0.5608369 |
| A_55_P1959 | 10682.6 | Detected | 6455.5  | Detected   | 12540.5 | Detected | 19063.4 | Detected   | Nagk          | 1.784528111 | 1.17391833 | 2.95304779 | 1.9426071 |
| A_51_P4772 | 212.6   | Detected | 271     | Detected   | 392.1   | Detected | 379.3   | Detected   | 1810014B01Rik | 1.784101599 | 1.84430856 | 1.399631   | 1.4468635 |
| A_55_P2035 | 19614.2 | Detected | 23021.5 | Detected   | 30144.5 | Detected | 34992.6 | Detected   | Tmbim1        | 1.784044213 | 1.53687125 | 1.51999652 | 1.3094064 |
| A_55_P2048 | 312.7   | Detected | 409.8   | Detected   | 367     | Detected | 557.8   | Detected   | Tlr13         | 1.783818356 | 1.17364886 | 1.36115178 | 0.8955588 |
| A_55_P1994 | 32.8    | Detected | 20.6    | Detected   | 33.7    | Detected | 58.5    | Detected   | Itsn1         | 1.783536585 | 1.02743902 | 2.83980583 | 1.6359223 |
| A_55_P2048 | 15.7    | Detected | 12      | Not Detect | 18.3    | Detected | 28      | Not Detect | D17Zt10e      | 1.78343949  | 1.1656051  | 2.33333333 | 1.525     |
| A_51_P4812 | 4968.4  | Detected | 2383    | Detected   | 6461    | Detected | 8860.5  | Detected   | Dopey2        | 1.783370904 | 1.30041865 | 3.71821234 | 2.7112883 |
| A_52_P2293 | 1180.6  | Detected | 1503.1  | Detected   | 1688    | Detected | 2105.3  | Detected   | Galnt4        | 1.783245807 | 1.42978147 | 1.40063868 | 1.1230124 |
| A_55_P2171 | 2456.7  | Detected | 4058.6  | Detected   | 2334.2  | Detected | 4380.6  | Detected   | 3110082I17Rik | 1.783123703 | 0.95013636 | 1.0793377  | 0.5751244 |
| A_51_P4634 | 16466.5 | Detected | 14291.1 | Detected   | 23039.6 | Detected | 29361.1 | Detected   | Rnh1          | 1.7830808   | 1.39918015 | 2.05450245 | 1.6121642 |
| A_51_P3249 | 30.4    | Detected | 28.2    | Detected   | 28.7    | Detected | 54.2    | Detected   | Olf821        | 1.782894737 | 0.94407895 | 1.92198582 | 1.0177305 |
| A_55_P2077 | 98.5    | Detected | 111.4   | Detected   | 71.5    | Detected | 175.6   | Detected   | Kat6b         | 1.782741117 | 0.72588832 | 1.57630162 | 0.6418312 |
| A_55_P1997 | 122.7   | Detected | 336.5   | Detected   | 132.6   | Detected | 218.7   | Detected   | Gyltl1b       | 1.782396088 | 1.0806846  | 0.64992571 | 0.3940565 |
| A_51_P4021 | 5375.6  | Detected | 4831.3  | Detected   | 7040.2  | Detected | 9578    | Detected   | Map3k1        | 1.781754595 | 1.30965846 | 1.98248919 | 1.4572061 |
| A_55_P2108 | 18.3    | Detected | 15.8    | Not Detect | 20.7    | Detected | 32.6    | Not Detect | Gm5936        | 1.781420765 | 1.13114754 | 2.06329114 | 1.3101266 |
| A_52_P3917 | 1138    | Detected | 1327.1  | Detected   | 1080.2  | Detected | 2025.6  | Detected   | Rpl22         | 1.779964851 | 0.94920914 | 1.52633562 | 0.8139552 |
| A_55_P2105 | 89.8    | Detected | 64.3    | Detected   | 98.6    | Detected | 159.8   | Detected   | Ralgapa2      | 1.779510022 | 1.09799555 | 2.48522551 | 1.533437  |
| A_51_P3244 | 4733.2  | Detected | 4489.3  | Detected   | 6429.8  | Detected | 8421.3  | Detected   | Cmpk1         | 1.779198006 | 1.35844672 | 1.87586038 | 1.43225   |
| A_55_P2185 | 64.6    | Detected | 84.9    | Detected   | 223.4   | Detected | 114.9   | Detected   | Nrg4          | 1.778637771 | 3.45820433 | 1.35335689 | 2.631331  |
| A_52_P1376 | 549.4   | Detected | 770.1   | Detected   | 619     | Detected | 976.6   | Detected   | Trappc5       | 1.777575537 | 1.12668365 | 1.26814699 | 0.8037917 |
| A_52_P3050 | 53.5    | Detected | 45.9    | Detected   | 67.2    | Detected | 95.1    | Detected   | B330016D10Rik | 1.777570093 | 1.25607477 | 2.07189542 | 1.4640523 |
| A_51_P1840 | 5365    | Detected | 8574.7  | Detected   | 9102.9  | Detected | 9536.3  | Detected   | Hbs1l         | 1.77750233  | 1.69671948 | 1.11214387 | 1.0615998 |
| A_51_P5117 | 5301.7  | Detected | 8765    | Detected   | 4980.2  | Detected | 9423.6  | Detected   | Ntpcr         | 1.777467605 | 0.93935907 | 1.07513976 | 0.5681917 |
| A_55_P2059 | 568.8   | Detected | 584.9   | Detected   | 760.3   | Detected | 1011    | Detected   | Spire2        | 1.77742616  | 1.3366737  | 1.7285006  | 1.2998803 |
| A_55_P2048 | 1870.8  | Detected | 1786.3  | Detected   | 2513.7  | Detected | 3324.5  | Detected   | Eif2ak3       | 1.777047253 | 1.34364978 | 1.86110956 | 1.4072104 |
| A_51_P2111 | 1535.5  | Detected | 2891.9  | Detected   | 1719.9  | Detected | 2728.6  | Detected   | Traf3ip2      | 1.777010746 | 1.12009118 | 0.94353193 | 0.5947301 |
| A_52_P1774 | 10604.2 | Detected | 10666.5 | Detected   | 3644.6  | Detected | 18843.5 | Detected   | Cdx2          | 1.776984591 | 0.34369401 | 1.76660573 | 0.3416866 |
| A_52_P6637 | 703.3   | Detected | 869.8   | Detected   | 889.9   | Detected | 1249.7  | Detected   | Nlr1          | 1.776908858 | 1.26532063 | 1.43676707 | 1.0231088 |
| A_52_P4828 | 10320.5 | Detected | 13393.3 | Detected   | 9299.1  | Detected | 18337.4 | Detected   | Areg          | 1.77679376  | 0.90103193 | 1.36914726 | 0.6943098 |



|            |         |            |         |            |         |            |         |            |               |             |            |            |           |
|------------|---------|------------|---------|------------|---------|------------|---------|------------|---------------|-------------|------------|------------|-----------|
| A_51_P3565 | 2210.1  | Detected   | 2759.8  | Detected   | 2340.8  | Detected   | 3925.1  | Detected   | Trappc11      | 1.775982987 | 1.0591376  | 1.42224074 | 0.8481774 |
| A_52_P2215 | 24.5    | Detected   | 33.2    | Detected   | 39.6    | Detected   | 43.5    | Not Detect | Gm5382        | 1.775510204 | 1.61632653 | 1.31024096 | 1.1927711 |
| A_55_P2008 | 28.5    | Detected   | 16.3    | Not Detect | 15      | Not Detect | 50.6    | Not Detect | Acadsb        | 1.775438596 | 0.52631579 | 3.10429448 | 0.9202454 |
| A_55_P1955 | 105.5   | Detected   | 324.1   | Detected   | 4       | Not Detect | 187.3   | Detected   | Sprr2k        | 1.775355545 | 0.03791469 | 0.57790805 | 0.0123419 |
| A_55_P1978 | 7114.9  | Detected   | 9601.2  | Detected   | 11223.3 | Detected   | 12629.8 | Detected   | H2-Q8         | 1.775119819 | 1.57743608 | 1.31543974 | 1.1689476 |
| A_55_P2062 | 208.1   | Detected   | 246.4   | Detected   | 216.5   | Detected   | 369.4   | Detected   | Acyp1         | 1.775108121 | 1.04036521 | 1.49918831 | 0.8786526 |
| A_55_P2143 | 95.4    | Detected   | 127.9   | Detected   | 66.7    | Detected   | 169.3   | Detected   | Col4a4        | 1.774633124 | 0.69916143 | 1.32369038 | 0.5215012 |
| A_55_P1996 | 3990.5  | Detected   | 6433.4  | Detected   | 3741.5  | Detected   | 7081.1  | Detected   | Papd5         | 1.774489412 | 0.9376018  | 1.10067771 | 0.5815743 |
| A_51_P3523 | 67.4    | Detected   | 63.2    | Detected   | 98.9    | Detected   | 119.6   | Detected   | Ldhal6b       | 1.774480712 | 1.46735905 | 1.89240506 | 1.5648734 |
| A_55_P2060 | 2091.8  | Detected   | 4039.7  | Detected   | 3547.3  | Detected   | 3711.8  | Detected   | Pus3          | 1.774452625 | 1.69581222 | 0.91883061 | 0.8781098 |
| A_55_P2003 | 102.8   | Detected   | 128.8   | Detected   | 126.5   | Detected   | 182.4   | Detected   | Capza1        | 1.774319066 | 1.23054475 | 1.41614907 | 0.9821429 |
| A_51_P1767 | 32.7    | Detected   | 34.7    | Detected   | 71.3    | Detected   | 58      | Detected   | 4930483J18Rik | 1.773700306 | 2.18042813 | 1.67146974 | 2.054755  |
| A_55_P2415 | 144     | Detected   | 182.1   | Detected   | 135.2   | Detected   | 255.4   | Detected   | 4930517J16Rik | 1.773611111 | 0.93888889 | 1.40252608 | 0.7424492 |
| A_55_P2143 | 23.4    | Detected   | 27      | Detected   | 20.3    | Detected   | 41.5    | Not Detect | Gja10         | 1.773504274 | 0.86752137 | 1.53703704 | 0.7518519 |
| A_55_P1982 | 7152.9  | Detected   | 7138.3  | Detected   | 8836.7  | Detected   | 12685.1 | Detected   | Tmem9b        | 1.773420571 | 1.23540103 | 1.77704776 | 1.2379278 |
| A_52_P5992 | 1758.1  | Detected   | 2521.8  | Detected   | 1701.7  | Detected   | 3117.7  | Detected   | Rspry1        | 1.77333485  | 0.96791991 | 1.23629947 | 0.6747958 |
| A_51_P1874 | 92.5    | Detected   | 66.4    | Detected   | 124.8   | Detected   | 164     | Detected   | Epgn          | 1.772972973 | 1.34918919 | 2.46987952 | 1.8795181 |
| A_55_P2059 | 3549.3  | Detected   | 3740    | Detected   | 4132.3  | Detected   | 6292.8  | Detected   | Snx7          | 1.772969318 | 1.16425774 | 1.68256684 | 1.104893  |
| A_52_P4410 | 18709   | Detected   | 21060.3 | Detected   | 23618.5 | Detected   | 33169.7 | Detected   | Apob          | 1.772927468 | 1.26241381 | 1.57498706 | 1.1214703 |
| A_52_P6081 | 447.4   | Detected   | 354.9   | Detected   | 592.5   | Detected   | 792.9   | Detected   | Snx32         | 1.772239607 | 1.32431828 | 2.23415046 | 1.6694844 |
| A_52_P2353 | 227.9   | Detected   | 486.5   | Detected   | 379.5   | Detected   | 403.8   | Detected   | Pigl          | 1.77182975  | 1.66520404 | 0.83001028 | 0.7800617 |
| A_51_P4385 | 38.1    | Detected   | 43.7    | Detected   | 18.9    | Detected   | 67.5    | Detected   | 4930412D23Rik | 1.771653543 | 0.49606299 | 1.54462243 | 0.4324943 |
| A_52_P2765 | 4041.8  | Detected   | 3504.4  | Detected   | 4728    | Detected   | 7160.3  | Detected   | Ankrd9        | 1.771562175 | 1.16977584 | 2.04323137 | 1.3491611 |
| A_52_P1398 | 33.7    | Detected   | 36.8    | Detected   | 31.6    | Detected   | 59.7    | Detected   | Zc3h6         | 1.771513353 | 0.93768546 | 1.62228261 | 0.8586957 |
| A_51_P1380 | 12472.9 | Detected   | 15604   | Detected   | 7520.1  | Detected   | 22093.2 | Detected   | Foxo1         | 1.77129617  | 0.60291512 | 1.41586773 | 0.4819341 |
| A_55_P2101 | 2405.5  | Detected   | 3904.8  | Detected   | 3949.7  | Detected   | 4259.2  | Detected   | Vta1          | 1.770609021 | 1.64194554 | 1.09076009 | 1.0114987 |
| A_55_P2051 | 74.9    | Detected   | 83      | Detected   | 89.5    | Detected   | 132.6   | Detected   | Bco2          | 1.770360481 | 1.19492657 | 1.59759036 | 1.0783133 |
| A_51_P2396 | 2743.8  | Detected   | 5847.1  | Detected   | 2742.6  | Detected   | 4857.1  | Detected   | Nr4a1         | 1.770209199 | 0.99956265 | 0.8306853  | 0.469053  |
| A_55_P1973 | 42.6    | Detected   | 22.9    | Detected   | 51.1    | Detected   | 75.4    | Detected   | Bricd5        | 1.769953052 | 1.19953052 | 3.29257642 | 2.231441  |
| A_52_P5375 | 3783.4  | Detected   | 4624.1  | Detected   | 3706.3  | Detected   | 6696.4  | Detected   | Cenpt         | 1.76994238  | 0.9796215  | 1.44815207 | 0.8015181 |
| A_66_P1307 | 1437.5  | Detected   | 1569.2  | Detected   | 1369    | Detected   | 2543.9  | Detected   | Ephb4         | 1.769669565 | 0.95234783 | 1.62114453 | 0.8724191 |
| A_52_P4072 | 2350.9  | Detected   | 3159.5  | Detected   | 3107.8  | Detected   | 4160.3  | Detected   | Adamtsl5      | 1.769662682 | 1.3219618  | 1.31675898 | 0.9836367 |
| A_55_P2000 | 47.3    | Detected   | 59.7    | Detected   | 65.9    | Detected   | 83.7    | Detected   | Rfx7          | 1.769556025 | 1.39323467 | 1.40201005 | 1.1038526 |
| A_55_P2109 | 7.8     | Not Detect | 18.6    | Detected   | 15.2    | Not Detect | 13.8    | Not Detect | Trnt1         | 1.769230769 | 1.94871795 | 0.74193548 | 0.8172043 |
| A_66_P1210 | 14.3    | Detected   | 17.6    | Detected   | 22.9    | Detected   | 25.3    | Not Detect | A730085E03Rik | 1.769230769 | 1.6013986  | 1.4375     | 1.3011364 |
| A_51_P2341 | 4106    | Detected   | 6268.8  | Detected   | 4386.6  | Detected   | 7263.4  | Detected   | Pms2          | 1.768972236 | 1.06833902 | 1.15865875 | 0.6997511 |
| A_55_P2087 | 334.1   | Detected   | 281.2   | Detected   | 444.1   | Detected   | 591     | Detected   | Il4i1         | 1.768931458 | 1.32924274 | 2.10170697 | 1.579303  |
| A_52_P5347 | 272.6   | Detected   | 323.6   | Detected   | 381.2   | Detected   | 482.2   | Detected   | Gm10101       | 1.76889215  | 1.39838591 | 1.49011125 | 1.1779975 |
| A_55_P2102 | 2330.1  | Detected   | 2393.2  | Detected   | 2966.6  | Detected   | 4121.1  | Detected   | Pnrc1         | 1.768636539 | 1.27316424 | 1.72200401 | 1.2395955 |
| A_55_P2109 | 3288.4  | Detected   | 4468.1  | Detected   | 2892.7  | Detected   | 5815.8  | Detected   | Dot1l         | 1.768580465 | 0.87966792 | 1.30162709 | 0.6474117 |

|            |         |          |         |          |         |            |         |            |               |             |            |            |           |
|------------|---------|----------|---------|----------|---------|------------|---------|------------|---------------|-------------|------------|------------|-----------|
| A_52_P1062 | 35      | Detected | 34.4    | Detected | 10.7    | Not Detect | 61.9    | Detected   | Rnf157        | 1.768571429 | 0.30571429 | 1.7994186  | 0.3110465 |
| A_51_P2377 | 14746.8 | Detected | 20878.4 | Detected | 25448   | Detected   | 26076.6 | Detected   | H2-T23        | 1.768288713 | 1.72566252 | 1.24897502 | 1.2188673 |
| A_52_P5652 | 151.6   | Detected | 276.5   | Detected | 241.2   | Detected   | 268     | Detected   | Cecr5         | 1.767810026 | 1.59102902 | 0.96925859 | 0.8723327 |
| A_55_P1991 | 8561.9  | Detected | 7476.7  | Detected | 9802.3  | Detected   | 15132.4 | Detected   | Dhx32         | 1.767411439 | 1.14487439 | 2.02394104 | 1.3110463 |
| A_55_P2028 | 59.7    | Detected | 44.7    | Detected | 69.5    | Detected   | 105.5   | Detected   | 5033425G24Rik | 1.767169179 | 1.1641541  | 2.36017897 | 1.5548098 |
| A_55_P2103 | 12895.9 | Detected | 14465.9 | Detected | 19240.3 | Detected   | 22784.1 | Detected   | Mrpl4         | 1.766770834 | 1.49197032 | 1.57502126 | 1.3300451 |
| A_51_P3897 | 1586.4  | Detected | 1745    | Detected | 2324    | Detected   | 2802.4  | Detected   | Relb          | 1.766515381 | 1.46495209 | 1.60595989 | 1.3318052 |
| A_55_P2157 | 506.2   | Detected | 489     | Detected | 767.6   | Detected   | 894.2   | Detected   | Tmem241       | 1.766495456 | 1.51639668 | 1.82862986 | 1.5697342 |
| A_55_P2294 | 845.1   | Detected | 765.3   | Detected | 1274.5  | Detected   | 1492.8  | Detected   | Pura          | 1.766418175 | 1.50810555 | 1.9506076  | 1.66536   |
| A_55_P2128 | 1359.7  | Detected | 1960.5  | Detected | 1250    | Detected   | 2401.7  | Detected   | Ids           | 1.766345517 | 0.91932044 | 1.22504463 | 0.6375925 |
| A_55_P2359 | 757.7   | Detected | 667.8   | Detected | 928.4   | Detected   | 1338.3  | Detected   | A930026B05Rik | 1.766266332 | 1.22528705 | 2.00404313 | 1.3902366 |
| A_51_P3527 | 103.5   | Detected | 105.7   | Detected | 165.2   | Detected   | 182.8   | Detected   | Mpv17l        | 1.766183575 | 1.59613527 | 1.72942289 | 1.5629139 |
| A_51_P4615 | 5105.7  | Detected | 5162.5  | Detected | 7290.9  | Detected   | 9017.3  | Detected   | Fdxr          | 1.766124136 | 1.42799224 | 1.74669249 | 1.4122809 |
| A_55_P2167 | 44      | Detected | 27      | Detected | 53.4    | Detected   | 77.7    | Detected   | Acsf2         | 1.765909091 | 1.21363636 | 2.87777778 | 1.9777778 |
| A_55_P2082 | 6862    | Detected | 7534.4  | Detected | 8701.2  | Detected   | 12116.8 | Detected   | Ezh1          | 1.765782571 | 1.26802681 | 1.60819707 | 1.154863  |
| A_55_P1965 | 47.8    | Detected | 80.5    | Detected | 65.1    | Detected   | 84.4    | Detected   | Ahsa2         | 1.765690377 | 1.36192469 | 1.0484472  | 0.8086957 |
| A_51_P1051 | 453.4   | Detected | 211.2   | Detected | 1007.6  | Detected   | 800.4   | Detected   | P2ry6         | 1.765328628 | 2.22232025 | 3.78977273 | 4.7708333 |
| A_55_P2001 | 14370.8 | Detected | 20274.2 | Detected | 15702.6 | Detected   | 25365.9 | Detected   | Dctn6         | 1.765100064 | 1.09267403 | 1.25114185 | 0.7745114 |
| A_55_P2018 | 36.6    | Detected | 65      | Detected | 52      | Detected   | 64.6    | Detected   | Tbpl1         | 1.765027322 | 1.42076503 | 0.99384615 | 0.8       |
| A_55_P1995 | 21.7    | Detected | 41.2    | Detected | 12      | Not Detect | 38.3    | Not Detect | Ptger1        | 1.764976959 | 0.55299539 | 0.92961165 | 0.2912621 |
| A_55_P2016 | 299.3   | Detected | 318.7   | Detected | 591.9   | Detected   | 528.2   | Detected   | Lrrc49        | 1.764784497 | 1.97761443 | 1.65735802 | 1.8572325 |
| A_51_P4262 | 200.3   | Detected | 185     | Detected | 402.7   | Detected   | 353.4   | Detected   | Pdk2          | 1.764353347 | 2.01048427 | 1.91027027 | 2.1767568 |
| A_52_P4032 | 66.1    | Detected | 86.6    | Detected | 177.6   | Detected   | 116.6   | Detected   | B230217C12Rik | 1.763993949 | 2.68683812 | 1.34642032 | 2.0508083 |
| A_55_P2017 | 39524.2 | Detected | 44436.5 | Detected | 63464   | Detected   | 69717.9 | Detected   | Etfb          | 1.763929441 | 1.6056998  | 1.5689332  | 1.4281953 |
| A_55_P2040 | 2180.2  | Detected | 3572.1  | Detected | 2506.1  | Detected   | 3845.7  | Detected   | Dhps          | 1.763920741 | 1.1494817  | 1.0765936  | 0.7015761 |
| A_52_P2199 | 664     | Detected | 961.2   | Detected | 860.3   | Detected   | 1170.9  | Detected   | Afmid         | 1.763403614 | 1.29563253 | 1.21816479 | 0.895027  |
| A_55_P2060 | 1005.3  | Detected | 692.1   | Detected | 2159    | Detected   | 1772.7  | Detected   | Rnf141        | 1.763354223 | 2.14761763 | 2.56133507 | 3.1194914 |
| A_55_P2030 | 128.5   | Detected | 687.9   | Detected | 135.5   | Detected   | 226.5   | Detected   | Esr1          | 1.762645914 | 1.05447471 | 0.32926297 | 0.1969763 |
| A_55_P2022 | 892.5   | Detected | 1097.2  | Detected | 756.3   | Detected   | 1573    | Detected   | Cntnap1       | 1.762464986 | 0.84739496 | 1.43364929 | 0.6893    |
| A_55_P2122 | 39.1    | Detected | 81.3    | Detected | 43.2    | Detected   | 68.9    | Detected   | Cbr2          | 1.762148338 | 1.10485934 | 0.84747847 | 0.5313653 |
| A_55_P1988 | 269.6   | Detected | 290.9   | Detected | 372.4   | Detected   | 475     | Detected   | Acss2         | 1.761869436 | 1.38130564 | 1.63286353 | 1.280165  |
| A_55_P2065 | 738.8   | Detected | 436.9   | Detected | 2017.1  | Detected   | 1301.6  | Detected   | Gstm3         | 1.761775853 | 2.73023822 | 2.97917144 | 4.616846  |
| A_55_P2036 | 23.5    | Detected | 29.3    | Detected | 30.5    | Detected   | 41.4    | Not Detect | Gm15292       | 1.761702128 | 1.29787234 | 1.41296928 | 1.0409556 |
| A_55_P1974 | 33.9    | Detected | 529.6   | Detected | 13.7    | Not Detect | 59.7    | Detected   | Fabp3         | 1.761061947 | 0.40412979 | 0.11272659 | 0.0258686 |
| A_55_P2159 | 831.8   | Detected | 1197.7  | Detected | 1100.8  | Detected   | 1464.8  | Detected   | Tead4         | 1.76100024  | 1.32339505 | 1.22301077 | 0.9190949 |
| A_51_P2249 | 2935.6  | Detected | 3726    | Detected | 2693.7  | Detected   | 5167.3  | Detected   | Cln8          | 1.760219376 | 0.91759777 | 1.38682233 | 0.7229469 |
| A_55_P2116 | 122.5   | Detected | 117.2   | Detected | 130.7   | Detected   | 215.6   | Detected   | Gm10371       | 1.76        | 1.06693878 | 1.83959044 | 1.1151877 |
| A_51_P5024 | 24935.3 | Detected | 27877.7 | Detected | 30873.5 | Detected   | 43876.5 | Detected   | Acot13        | 1.759613881 | 1.23814432 | 1.57389239 | 1.1074622 |
| A_55_P2055 | 462.3   | Detected | 483.6   | Detected | 734.1   | Detected   | 813.2   | Detected   | Etfb          | 1.759030932 | 1.58792992 | 1.681555   | 1.5179901 |
| A_55_P2064 | 19.5    | Detected | 21      | Detected | 19.7    | Detected   | 34.3    | Not Detect | Mpp4          | 1.758974359 | 1.01025641 | 1.63333333 | 0.9380952 |

|            |                  |                  |                  |                  |               |             |            |            |           |
|------------|------------------|------------------|------------------|------------------|---------------|-------------|------------|------------|-----------|
| A_55_P1971 | 11.6 Not Detect  | 21.1 Detected    | 22.6 Detected    | 20.4 Not Detect  | Gm6042        | 1.75862069  | 1.94827586 | 0.96682464 | 1.07109   |
| A_55_P1957 | 15012.9 Detected | 13568.9 Detected | 18795.1 Detected | 26399.9 Detected | Dhx32         | 1.75848104  | 1.25193001 | 1.94561829 | 1.3851602 |
| A_55_P2139 | 12 Not Detect    | 79 Detected      | 7.7 Not Detect   | 21.1 Not Detect  | Amy2a5        | 1.758333333 | 0.64166667 | 0.26708861 | 0.0974684 |
| A_55_P2165 | 256.3 Detected   | 898.8 Detected   | 588.3 Detected   | 450.6 Detected   | Krt36         | 1.758095981 | 2.295357   | 0.50133511 | 0.6545394 |
| A_55_P2126 | 80.6 Detected    | 67.1 Detected    | 47.7 Detected    | 141.7 Detected   | Zfp467        | 1.758064516 | 0.59181141 | 2.11177347 | 0.7108793 |
| A_51_P4386 | 12424.2 Detected | 13651.3 Detected | 15971.8 Detected | 21835.5 Detected | Keap1         | 1.757497465 | 1.28553951 | 1.59951799 | 1.1699838 |
| A_51_P5109 | 1239.6 Detected  | 2191.8 Detected  | 1692.3 Detected  | 2178 Detected    | Chchd7        | 1.757018393 | 1.36519845 | 0.99370381 | 0.7721051 |
| A_55_P2181 | 66.2 Detected    | 79.2 Detected    | 119.5 Detected   | 116.3 Detected   | Apol7a        | 1.756797583 | 1.80513595 | 1.46843434 | 1.5088384 |
| A_52_P2021 | 134 Detected     | 121.8 Detected   | 186.3 Detected   | 235.4 Detected   | Sv2a          | 1.756716418 | 1.39029851 | 1.93267652 | 1.5295567 |
| A_55_P2030 | 37.4 Detected    | 59.7 Detected    | 55.8 Detected    | 65.7 Detected    | Fan1          | 1.756684492 | 1.49197861 | 1.10050251 | 0.9346734 |
| A_55_P2074 | 3283.9 Detected  | 5048.2 Detected  | 2327.8 Detected  | 5768.3 Detected  | Nr2f1         | 1.75653948  | 0.70885228 | 1.1426449  | 0.4611149 |
| A_55_P1990 | 50.5 Detected    | 85.3 Detected    | 38.2 Detected    | 88.7 Detected    | Ophn1         | 1.756435644 | 0.75643564 | 1.03985932 | 0.4478312 |
| A_55_P2052 | 1592.5 Detected  | 2578.7 Detected  | 1557.7 Detected  | 2796.3 Detected  | Pcm1          | 1.755918367 | 0.97814757 | 1.0843836  | 0.6040641 |
| A_51_P3490 | 3245.4 Detected  | 1843.1 Detected  | 6657.2 Detected  | 5694.8 Detected  | Endog         | 1.754729771 | 2.05127257 | 3.08979437 | 3.6119581 |
| A_52_P6637 | 420.2 Detected   | 414.5 Detected   | 546.1 Detected   | 737.1 Detected   | Ganc          | 1.754164683 | 1.29961923 | 1.77828709 | 1.317491  |
| A_52_P4087 | 6.1 Not Detect   | 12.3 Not Detect  | 20.6 Detected    | 10.7 Not Detect  | Fcgr3         | 1.754098361 | 3.37704918 | 0.8699187  | 1.6747967 |
| A_55_P2147 | 6.1 Not Detect   | 26.7 Detected    | 21 Detected      | 10.7 Not Detect  | Olf141        | 1.754098361 | 3.44262295 | 0.40074906 | 0.7865169 |
| A_55_P2175 | 664.7 Detected   | 625.9 Detected   | 698.2 Detected   | 1165.7 Detected  | Chd2          | 1.753723484 | 1.05039868 | 1.86243809 | 1.1155137 |
| A_55_P2118 | 955.1 Detected   | 1556.6 Detected  | 665.9 Detected   | 1674.8 Detected  | Zfp68         | 1.753533661 | 0.69720448 | 1.07593473 | 0.4277913 |
| A_55_P1986 | 187.4 Detected   | 233.5 Detected   | 200.6 Detected   | 328.6 Detected   | Tbc1d32       | 1.753468517 | 1.07043757 | 1.40728051 | 0.8591006 |
| A_55_P2178 | 1000.3 Detected  | 1519.7 Detected  | 1065.4 Detected  | 1753.9 Detected  | Ccsap         | 1.753373988 | 1.06508048 | 1.15410936 | 0.7010594 |
| A_66_P1110 | 75 Detected      | 108 Detected     | 192.4 Detected   | 131.5 Detected   | Epb4.1l5      | 1.753333333 | 2.56533333 | 1.21759259 | 1.7814815 |
| A_55_P2129 | 7306.1 Detected  | 9922 Detected    | 7722.8 Detected  | 12809.2 Detected | Rheb          | 1.753219912 | 1.05703453 | 1.29098972 | 0.7783511 |
| A_51_P3938 | 1313.2 Detected  | 1636.1 Detected  | 2077.7 Detected  | 2302.3 Detected  | Spryd4        | 1.753198294 | 1.5821657  | 1.40718782 | 1.2699102 |
| A_55_P1991 | 85 Detected      | 101.6 Detected   | 110 Detected     | 149 Detected     | Npvf          | 1.752941176 | 1.29411765 | 1.46653543 | 1.0826772 |
| A_52_P4693 | 15693.6 Detected | 22770 Detected   | 28416.9 Detected | 27508.5 Detected | Comtd1        | 1.752848295 | 1.81073176 | 1.20810277 | 1.2479974 |
| A_51_P3293 | 4553.5 Detected  | 7156.6 Detected  | 6452.3 Detected  | 7980.4 Detected  | Zfand1        | 1.752585923 | 1.41699791 | 1.11511053 | 0.9015873 |
| A_55_P2164 | 23.8 Detected    | 42.5 Detected    | 35.7 Detected    | 41.7 Not Detect  | Efcab12       | 1.75210084  | 1.5        | 0.98117647 | 0.84      |
| A_55_P1988 | 337.5 Detected   | 276.5 Detected   | 315.1 Detected   | 590.6 Detected   | Mblac2        | 1.749925926 | 0.93362963 | 2.13598553 | 1.1396022 |
| A_55_P1978 | 2733.9 Detected  | 5441 Detected    | 2849.8 Detected  | 4783.2 Detected  | Fbxo8         | 1.7495885   | 1.04239365 | 0.87910311 | 0.523764  |
| A_51_P2348 | 41.1 Detected    | 51.3 Detected    | 31.8 Detected    | 71.9 Detected    | 1700001L19Rik | 1.749391727 | 0.77372263 | 1.40155945 | 0.619883  |
| A_55_P2173 | 36.3 Detected    | 48.7 Detected    | 35.8 Detected    | 63.5 Detected    | Vmn2r4        | 1.749311295 | 0.9862259  | 1.30390144 | 0.7351129 |
| A_55_P1977 | 32.7 Detected    | 31.1 Detected    | 32.2 Detected    | 57.2 Detected    | Klk4          | 1.749235474 | 0.98470948 | 1.8392283  | 1.0353698 |
| A_55_P1981 | 161 Detected     | 143.6 Detected   | 228.5 Detected   | 281.6 Detected   | 5430410E06Rik | 1.749068323 | 1.41925466 | 1.96100279 | 1.5912256 |
| A_51_P4532 | 10598.3 Detected | 9929.9 Detected  | 21432.7 Detected | 18534.1 Detected | AI462493      | 1.748780465 | 2.02227716 | 1.86649412 | 2.1584004 |
| A_51_P1470 | 227.8 Detected   | 191.7 Detected   | 265.6 Detected   | 398.3 Detected   | Ica1l         | 1.748463565 | 1.16593503 | 2.07772561 | 1.3854982 |
| A_55_P2069 | 1274.9 Detected  | 1566.6 Detected  | 1242.6 Detected  | 2228.7 Detected  | Ttll3         | 1.748137109 | 0.97466468 | 1.42263501 | 0.7931827 |
| A_55_P2021 | 201.6 Detected   | 363.1 Detected   | 369.5 Detected   | 352.4 Detected   | Hbs1l         | 1.748015873 | 1.8328373  | 0.97053153 | 1.017626  |
| A_51_P3882 | 1782.8 Detected  | 2404.1 Detected  | 2325 Detected    | 3116.2 Detected  | Mmachc        | 1.747924613 | 1.30412834 | 1.29620232 | 0.9670979 |
| A_51_P3927 | 1733.3 Detected  | 1787.3 Detected  | 2807 Detected    | 3029.6 Detected  | Xpc           | 1.747879767 | 1.61945422 | 1.69507078 | 1.5705254 |

|            |                  |                  |                  |                  |               |             |            |            |           |
|------------|------------------|------------------|------------------|------------------|---------------|-------------|------------|------------|-----------|
| A_55_P2084 | 23 Detected      | 74.5 Detected    | 14.8 Not Detect  | 40.2 Not Detect  | Gm10661       | 1.747826087 | 0.64347826 | 0.53959732 | 0.1986577 |
| A_52_P4912 | 226.7 Detected   | 291.6 Detected   | 56.9 Detected    | 396.2 Detected   | Zfp287        | 1.747684164 | 0.2509925  | 1.35871056 | 0.1951303 |
| A_55_P2075 | 568.7 Detected   | 488.6 Detected   | 510.9 Detected   | 993.8 Detected   | Zfp609        | 1.747494285 | 0.89836469 | 2.03397462 | 1.0456406 |
| A_55_P1984 | 19.4 Detected    | 29.2 Detected    | 8.6 Not Detect   | 33.9 Not Detect  | Retn          | 1.74742268  | 0.44329897 | 1.1609589  | 0.2945205 |
| A_51_P4317 | 1056.9 Detected  | 1838.6 Detected  | 1305 Detected    | 1846.7 Detected  | Fam185a       | 1.74727978  | 1.23474312 | 1.00440553 | 0.7097792 |
| A_55_P2179 | 65.2 Detected    | 153.6 Detected   | 44.6 Detected    | 113.9 Detected   | A630033H20Rik | 1.746932515 | 0.68404908 | 0.74153646 | 0.2903646 |
| A_55_P2389 | 943.6 Detected   | 625.9 Detected   | 1291.1 Detected  | 1648.4 Detected  | Gpr64         | 1.746926664 | 1.36827045 | 2.63364755 | 2.0627896 |
| A_51_P1612 | 936.2 Detected   | 1564.3 Detected  | 1176.6 Detected  | 1635.4 Detected  | Ccl25         | 1.746848964 | 1.25678274 | 1.04545164 | 0.7521575 |
| A_55_P1984 | 2444.1 Detected  | 1529.8 Detected  | 3641 Detected    | 4268.1 Detected  | Naip2         | 1.746286977 | 1.48970991 | 2.78997255 | 2.3800497 |
| A_51_P3570 | 12815.7 Detected | 17781.1 Detected | 13892.2 Detected | 22374.3 Detected | Dctn6         | 1.745850792 | 1.08399853 | 1.25831923 | 0.7812902 |
| A_52_P3736 | 17.3 Detected    | 7 Not Detect     | 27.6 Detected    | 30.2 Not Detect  | Zfp174        | 1.74566474  | 1.59537572 | 4.31428571 | 3.9428571 |
| A_51_P3082 | 78.6 Detected    | 58.9 Detected    | 43.9 Detected    | 137.2 Detected   | Myl9          | 1.745547074 | 0.55852417 | 2.32937182 | 0.7453311 |
| A_51_P2483 | 3543.4 Detected  | 4033.1 Detected  | 4527.8 Detected  | 6183.8 Detected  | Vps26b        | 1.745160016 | 1.27781227 | 1.53326225 | 1.12266   |
| A_55_P2006 | 1421.6 Detected  | 724 Detected     | 280.6 Detected   | 2480 Detected    | Myo5c         | 1.744513225 | 0.19738323 | 3.42541436 | 0.3875691 |
| A_51_P1368 | 18 Detected      | 31.8 Detected    | 25.3 Detected    | 31.4 Not Detect  | Kif9          | 1.744444444 | 1.40555556 | 0.98742138 | 0.7955975 |
| A_55_P2032 | 14995.5 Detected | 17547.6 Detected | 22833.1 Detected | 26157.4 Detected | Bola3         | 1.744349972 | 1.52266347 | 1.49065399 | 1.3012093 |
| A_51_P2635 | 535.5 Detected   | 425.5 Detected   | 70.4 Detected    | 934 Detected     | Pank1         | 1.744164332 | 0.13146592 | 2.19506463 | 0.1654524 |
| A_55_P2024 | 5314.4 Detected  | 4384.9 Detected  | 6153.1 Detected  | 9268 Detected    | Suv420h2      | 1.743940991 | 1.1578165  | 2.11361719 | 1.4032475 |
| A_55_P2178 | 2325.6 Detected  | 2196.7 Detected  | 2939.7 Detected  | 4055.6 Detected  | Tmem80        | 1.743894049 | 1.26406089 | 1.84622388 | 1.3382346 |
| A_66_P1340 | 4541.5 Detected  | 5424 Detected    | 5905.5 Detected  | 7919.6 Detected  | Vps25         | 1.743829131 | 1.3003413  | 1.46010324 | 1.0887721 |
| A_55_P2027 | 207.6 Detected   | 194.7 Detected   | 206.6 Detected   | 362 Detected     | Prdm9         | 1.743737958 | 0.99518304 | 1.85927067 | 1.0611197 |
| A_55_P2074 | 286.7 Detected   | 344.9 Detected   | 290.3 Detected   | 499.8 Detected   | Yars          | 1.743285664 | 1.01255668 | 1.44911569 | 0.8416932 |
| A_55_P2022 | 23435.6 Detected | 23267.7 Detected | 27820.2 Detected | 40853.6 Detected | Cdkn2d        | 1.743228251 | 1.18709143 | 1.75580741 | 1.1956575 |
| A_55_P2151 | 40050.1 Detected | 40216.8 Detected | 29573.9 Detected | 69797.9 Detected | Nudt9         | 1.742764687 | 0.73842263 | 1.73554087 | 0.7353618 |
| A_65_P1939 | 24717.1 Detected | 30985.9 Detected | 36470.2 Detected | 43065.8 Detected | H2-D1         | 1.742348415 | 1.47550481 | 1.38985151 | 1.1769934 |
| A_55_P2106 | 58.6 Detected    | 61.7 Detected    | 45 Detected      | 102.1 Detected   | Bglap2        | 1.742320819 | 0.76791809 | 1.6547812  | 0.7293355 |
| A_55_P2000 | 18482.5 Detected | 10617.8 Detected | 18572.7 Detected | 32196.2 Detected | Slc6a8        | 1.741982957 | 1.00488029 | 3.03228541 | 1.7492042 |
| A_52_P3683 | 397.2 Detected   | 519.4 Detected   | 432 Detected     | 691.9 Detected   | Rap2b         | 1.741943605 | 1.08761329 | 1.33211398 | 0.8317289 |
| A_52_P3501 | 98.4 Detected    | 118.9 Detected   | 84.6 Detected    | 171.4 Detected   | Celsr2        | 1.741869919 | 0.8597561  | 1.44154752 | 0.7115223 |
| A_55_P2106 | 21.3 Detected    | 35.8 Detected    | 29.1 Detected    | 37.1 Not Detect  | Tctn1         | 1.741784038 | 1.36619718 | 1.03631285 | 0.8128492 |
| A_55_P2167 | 129.3 Detected   | 143.4 Detected   | 169.5 Detected   | 225.2 Detected   | Nat9          | 1.741686002 | 1.31090487 | 1.57043236 | 1.1820084 |
| A_51_P3831 | 467.5 Detected   | 753.5 Detected   | 170.1 Detected   | 814.2 Detected   | Pde9a         | 1.741604278 | 0.36385027 | 1.0805574  | 0.2257465 |
| A_55_P2010 | 38.7 Detected    | 59.8 Detected    | 33.8 Detected    | 67.4 Detected    | Tdpoz2        | 1.741602067 | 0.87338501 | 1.1270903  | 0.5652174 |
| A_51_P1817 | 253.4 Detected   | 247.3 Detected   | 387.4 Detected   | 441.3 Detected   | Zfyve1        | 1.741515391 | 1.52880821 | 1.7844723  | 1.5665184 |
| A_52_P2144 | 112.9 Detected   | 97.8 Detected    | 47.9 Detected    | 196.6 Detected   | Gm5148        | 1.741364039 | 0.42426926 | 2.01022495 | 0.4897751 |
| A_55_P2114 | 526.2 Detected   | 542.5 Detected   | 1088.8 Detected  | 916.3 Detected   | Gtf2a2        | 1.741353098 | 2.06917522 | 1.68903226 | 2.0070046 |
| A_55_P2032 | 323.4 Detected   | 795.8 Detected   | 417.6 Detected   | 563.1 Detected   | Klra9         | 1.741187384 | 1.29128015 | 0.70758985 | 0.524755  |
| A_55_P2101 | 375.3 Detected   | 1563.3 Detected  | 402.5 Detected   | 653.1 Detected   | Ramp2         | 1.740207834 | 1.07247535 | 0.4177701  | 0.2574682 |
| A_55_P2232 | 20.4 Detected    | 20 Detected      | 19.5 Detected    | 35.5 Not Detect  | 2900057B20Rik | 1.740196078 | 0.95588235 | 1.775      | 0.975     |
| A_51_P4846 | 35.4 Detected    | 131.8 Detected   | 5.7 Not Detect   | 61.6 Detected    | Adcy3         | 1.740112994 | 0.16101695 | 0.46737481 | 0.0432473 |

|            |                  |                  |                  |                  |               |             |            |            |           |
|------------|------------------|------------------|------------------|------------------|---------------|-------------|------------|------------|-----------|
| A_55_P2128 | 25 Detected      | 35.1 Detected    | 24.5 Detected    | 43.5 Not Detect  | Dclre1b       | 1.74        | 0.98       | 1.23931624 | 0.6980057 |
| A_55_P2319 | 92.9 Detected    | 153.6 Detected   | 153.9 Detected   | 161.6 Detected   | BB557941      | 1.739504844 | 1.65662002 | 1.05208333 | 1.0019531 |
| A_55_P2258 | 136.3 Detected   | 105 Detected     | 255.5 Detected   | 237 Detected     | 4833445107Rik | 1.738811445 | 1.87454145 | 2.25714286 | 2.4333333 |
| A_55_P1957 | 28.6 Detected    | 41.1 Detected    | 13.9 Not Detect  | 49.7 Detected    | Snx25         | 1.737762238 | 0.48601399 | 1.20924574 | 0.3381995 |
| A_55_P2057 | 48.8 Detected    | 60.2 Detected    | 56.6 Detected    | 84.8 Detected    | Gm6654        | 1.737704918 | 1.15983607 | 1.40863787 | 0.9401993 |
| A_55_P2051 | 790.9 Detected   | 915.5 Detected   | 953.7 Detected   | 1374.2 Detected  | Ccdc88c       | 1.737514224 | 1.20584145 | 1.50103768 | 1.0417258 |
| A_51_P4433 | 13256.5 Detected | 18019.5 Detected | 14208.6 Detected | 23032.7 Detected | Trappc2l      | 1.73746464  | 1.07182137 | 1.27820972 | 0.7885124 |
| A_51_P4909 | 171.2 Detected   | 315.4 Detected   | 216.2 Detected   | 297.4 Detected   | Hapln4        | 1.737149533 | 1.26285047 | 0.94292961 | 0.6854788 |
| A_51_P2505 | 1845.9 Detected  | 3104 Detected    | 1587 Detected    | 3206.1 Detected  | Dhx38         | 1.73687632  | 0.85974321 | 1.03289304 | 0.5112758 |
| A_51_P4238 | 201.2 Detected   | 140.7 Detected   | 179.5 Detected   | 349.4 Detected   | 4632433K11Rik | 1.736580517 | 0.89214712 | 2.4832978  | 1.275764  |
| A_55_P2099 | 10054.6 Detected | 5760.3 Detected  | 22109.7 Detected | 17460.5 Detected | Klc4          | 1.736568337 | 2.19896366 | 3.03117893 | 3.8382897 |
| A_55_P2109 | 616.1 Detected   | 554.5 Detected   | 1425.1 Detected  | 1069.8 Detected  | Plekha7       | 1.736406428 | 2.31309852 | 1.92930568 | 2.5700631 |
| A_52_P3997 | 1535.9 Detected  | 1382.2 Detected  | 2547.7 Detected  | 2666.9 Detected  | Ccdc50        | 1.736376066 | 1.65876685 | 1.92946028 | 1.843221  |
| A_55_P1967 | 414.9 Detected   | 306.3 Detected   | 307.3 Detected   | 720.4 Detected   | Fam19a5       | 1.736322005 | 0.7406604  | 2.35194254 | 1.0032648 |
| A_55_P1972 | 51304.1 Detected | 68734.1 Detected | 53169.8 Detected | 89064.9 Detected | Polr1d        | 1.736019149 | 1.03636551 | 1.29578914 | 0.7735578 |
| A_51_P4330 | 587.8 Detected   | 553.7 Detected   | 506.3 Detected   | 1020.4 Detected  | Chmp4c        | 1.735964614 | 0.8613474  | 1.8428752  | 0.9143941 |
| A_55_P2039 | 664.5 Detected   | 1066.2 Detected  | 735.4 Detected   | 1153.5 Detected  | Acyp2         | 1.735891648 | 1.10669676 | 1.08187957 | 0.6897393 |
| A_52_P3453 | 5.3 Not Detect   | 19.4 Detected    | 3.2 Not Detect   | 9.2 Not Detect   | Ccdc37        | 1.735849057 | 0.60377358 | 0.4742268  | 0.1649485 |
| A_55_P2073 | 5.3 Not Detect   | 63.8 Detected    | 5.4 Not Detect   | 9.2 Not Detect   | Fgf6          | 1.735849057 | 1.01886792 | 0.14420063 | 0.0846395 |
| A_55_P2017 | 2757.5 Detected  | 2005.2 Detected  | 1624.5 Detected  | 4786.4 Detected  | Rbm43         | 1.735775159 | 0.58912058 | 2.38699382 | 0.8101436 |
| A_51_P3300 | 7717.4 Detected  | 8229.1 Detected  | 9318.8 Detected  | 13392.3 Detected | Trappc9       | 1.735338326 | 1.20750512 | 1.62743192 | 1.1324203 |
| A_55_P1987 | 885.9 Detected   | 1155.2 Detected  | 624 Detected     | 1537.3 Detected  | Fam214b       | 1.735297438 | 0.70436844 | 1.33076524 | 0.5401662 |
| A_66_P1405 | 7070.8 Detected  | 9006.6 Detected  | 10226.3 Detected | 12269.7 Detected | Selk          | 1.735263337 | 1.44627199 | 1.36230098 | 1.1354229 |
| A_55_P1966 | 267 Detected     | 419.5 Detected   | 262.4 Detected   | 463.3 Detected   | Actr3b        | 1.735205993 | 0.98277154 | 1.10441001 | 0.6255066 |
| A_55_P1963 | 2074.3 Detected  | 2382.5 Detected  | 2520.6 Detected  | 3599.1 Detected  | Pgap1         | 1.735091356 | 1.21515692 | 1.51064008 | 1.0579643 |
| A_51_P4087 | 4.9 Not Detect   | 6.8 Not Detect   | 126.3 Detected   | 8.5 Not Detect   | Abcb8         | 1.734693878 | 25.7755102 | 1.25       | 18.573529 |
| A_52_P4538 | 7722.5 Detected  | 9616.8 Detected  | 4677.9 Detected  | 13395.4 Detected | Foxo1         | 1.73459372  | 0.60574943 | 1.39291656 | 0.48643   |
| A_51_P1733 | 44.4 Detected    | 56.2 Detected    | 49.7 Detected    | 77 Detected      | Dtd2          | 1.734234234 | 1.11936937 | 1.37010676 | 0.8843416 |
| A_51_P3457 | 1945 Detected    | 1897.7 Detected  | 2989.8 Detected  | 3372.8 Detected  | Tmem180       | 1.734087404 | 1.53717224 | 1.77730937 | 1.5754861 |
| A_55_P1956 | 3539.8 Detected  | 3642.1 Detected  | 3231.3 Detected  | 6137.1 Detected  | Fam83g        | 1.733742019 | 0.91284818 | 1.68504434 | 0.8872079 |
| A_55_P2301 | 33436.3 Detected | 34753 Detected   | 35501.6 Detected | 57966.6 Detected | A530030E21Rik | 1.733642777 | 1.0617682  | 1.6679596  | 1.0215406 |
| A_55_P1999 | 2860.7 Detected  | 2996.3 Detected  | 3045.1 Detected  | 4959 Detected    | Galnt12       | 1.733491803 | 1.06445975 | 1.65504122 | 1.0162868 |
| A_55_P2221 | 1926.2 Detected  | 922 Detected     | 3220.1 Detected  | 3338.6 Detected  | Il22ra1       | 1.73325719  | 1.6717371  | 3.62104121 | 3.4925163 |
| A_51_P1074 | 15850.7 Detected | 21401.3 Detected | 22530.9 Detected | 27463.5 Detected | Mrpl34        | 1.732636414 | 1.42144511 | 1.28326317 | 1.0527818 |
| A_51_P4449 | 4114.5 Detected  | 2840.4 Detected  | 7191.4 Detected  | 7127.4 Detected  | Tmem203       | 1.732263945 | 1.74781869 | 2.50929447 | 2.5318265 |
| A_55_P2256 | 45.5 Detected    | 44.6 Detected    | 41.2 Detected    | 78.8 Detected    | 2810019C22Rik | 1.731868132 | 0.90549451 | 1.76681614 | 0.9237668 |
| A_52_P3546 | 5673.4 Detected  | 5937.7 Detected  | 9306.3 Detected  | 9824.2 Detected  | Elovl7        | 1.731624775 | 1.64033913 | 1.65454637 | 1.567324  |
| A_52_P5787 | 309.3 Detected   | 312.5 Detected   | 390.7 Detected   | 535.5 Detected   | Slc38a9       | 1.731328807 | 1.26317491 | 1.7136     | 1.25024   |
| A_66_P1353 | 103 Detected     | 101.4 Detected   | 94.6 Detected    | 178.3 Detected   | Tyr           | 1.731067961 | 0.9184466  | 1.75838264 | 0.9329389 |
| A_51_P1144 | 36.8 Detected    | 26.9 Detected    | 35.7 Detected    | 63.7 Detected    | Tceanc2       | 1.730978261 | 0.9701087  | 2.36802974 | 1.3271375 |

|            |         |            |         |            |         |            |         |            |               |             |             |            |            |           |
|------------|---------|------------|---------|------------|---------|------------|---------|------------|---------------|-------------|-------------|------------|------------|-----------|
| A_66_P1227 | 147.8   | Detected   | 145.3   | Detected   | 219.7   | Detected   | 255.8   | Detected   | BC025920      | 1.730717185 | 1.4864682   | 1.76049553 | 1.512044   |           |
| A_55_P1965 | 38.6    | Detected   | 39.7    | Detected   | 56.6    | Detected   | 66.8    | Detected   | Kbtbd3        | 1.730569948 | 1.46632124  | 1.68261965 | 1.4256927  |           |
| A_55_P2164 | 923.9   | Detected   | 1068    | Detected   | 1320    | Detected   | 1598.6  | Detected   | Hoxa10        | 1.730273839 | 1.42872605  | 1.49681648 | 1.2359551  |           |
| A_51_P3286 | 16.3    | Detected   | 90.6    | Detected   | 23.4    | Detected   | 28.2    | Not Detect | Sis           | 1.73006135  | 1.43558282  | 0.31125828 | 0.2582781  |           |
| A_55_P2019 | 192.6   | Detected   | 446.2   | Detected   | 324.9   | Detected   | 333.2   | Detected   | 2700060E02Rik | 1.730010384 | 1.68691589  | 0.74675034 | 0.7281488  |           |
| A_51_P4705 | 20      | Detected   | 25      | Detected   | 21.7    | Detected   | 34.6    | Not Detect | 1700019B03Rik | 1.73        | 1.085       | 1.384      | 0.868      |           |
| A_55_P2348 | 300.8   | Detected   | 201.8   | Detected   | 229.4   | Detected   | 520.3   | Detected   | 1700025G04Rik | 1.729720745 | 0.76263298  | 2.57829534 | 1.1367691  |           |
| A_51_P1434 | 723.6   | Detected   | 1075.5  | Detected   | 526.7   | Detected   | 1251.4  | Detected   | Klhl26        | 1.729408513 | 0.72788834  | 1.16355184 | 0.4897257  |           |
| A_52_P1067 | 57.6    | Detected   | 56.9    | Detected   | 58.4    | Detected   | 99.6    | Detected   | Gk5           | 1.729166667 | 1.01388889  | 1.75043937 | 1.026362   |           |
| A_52_P4586 | 17439.8 | Detected   | 20604.2 | Detected   | 22269.8 | Detected   | 30152   | Detected   | Higd1a        | 1.72891891  | 1.27695272  | 1.46339096 | 1.0808379  |           |
| A_55_P2165 | 20.6    | Detected   | 19.9    | Detected   | 12.2    | Not Detect | 35.6    | Not Detect | Zbtb4         | 1.72815534  | 0.59223301  | 1.78894472 | 0.6130653  |           |
| A_51_P1252 | 3668    | Detected   | 868.6   | Detected   | 34593   | Detected   | 6337    | Detected   | Aqp1          | 1.727644493 | 9.43102508  | 7.29564817 | 39.826157  |           |
| A_55_P2015 | 1228.7  | Detected   | 822.1   | Detected   | 2747.3  | Detected   | 2122.6  | Detected   |               | 3-Mar       | 1.727516888 | 2.23594042 | 2.58192434 | 3.3418076 |
| A_55_P2050 | 2800.1  | Detected   | 3041    | Detected   | 3561.7  | Detected   | 4836.9  | Detected   | Zbed4         | 1.727402593 | 1.27199029  | 1.59056232 | 1.1712266  |           |
| A_55_P1988 | 1470.3  | Detected   | 1471.1  | Detected   | 2114.8  | Detected   | 2539.4  | Detected   | Acss2         | 1.727130518 | 1.43834592  | 1.72619129 | 1.4375637  |           |
| A_55_P2138 | 35.9    | Detected   | 63.5    | Detected   | 18.2    | Detected   | 62      | Detected   | Stau2         | 1.727019499 | 0.50696379  | 0.97637795 | 0.2866142  |           |
| A_51_P4152 | 1512.2  | Detected   | 1238.2  | Detected   | 1320.6  | Detected   | 2611    | Detected   | LOC101055652  | 1.726623463 | 0.87329718  | 2.10870619 | 1.0665482  |           |
| A_55_P2122 | 79      | Detected   | 91.8    | Detected   | 96.3    | Detected   | 136.4   | Detected   | Olfir207      | 1.726582278 | 1.21898734  | 1.48583878 | 1.0490196  |           |
| A_55_P2029 | 168.1   | Detected   | 207.3   | Detected   | 183.2   | Detected   | 290.2   | Detected   | Smad1         | 1.726353361 | 1.08982748  | 1.39990352 | 0.8837434  |           |
| A_55_P2081 | 6558    | Detected   | 5482.9  | Detected   | 5307.3  | Detected   | 11318.9 | Detected   | Btbdl         | 1.725968283 | 0.80928637  | 2.06440023 | 0.9679732  |           |
| A_51_P1610 | 1219.7  | Detected   | 636.3   | Detected   | 1264.2  | Detected   | 2105.1  | Detected   | Itgb6         | 1.725916209 | 1.03648438  | 3.30834512 | 1.9867987  |           |
| A_55_P2016 | 63.1    | Detected   | 80.4    | Detected   | 59.9    | Detected   | 108.9   | Detected   | Slc1a7        | 1.725832013 | 0.94928685  | 1.35447761 | 0.7450249  |           |
| A_51_P4625 | 4342.1  | Detected   | 5354.4  | Detected   | 5456.6  | Detected   | 7493.6  | Detected   | Gmppa         | 1.72580088  | 1.25667304  | 1.39952189 | 1.0190871  |           |
| A_55_P2020 | 1324.3  | Detected   | 1239.9  | Detected   | 1204.1  | Detected   | 2285.3  | Detected   | Aasdh         | 1.72566639  | 0.90923507  | 1.84313251 | 0.9711267  |           |
| A_51_P1073 | 1974.6  | Detected   | 5467.5  | Detected   | 2537.9  | Detected   | 3407.5  | Detected   | Socs2         | 1.725665958 | 1.28527297  | 0.62322817 | 0.4641792  |           |
| A_51_P2173 | 14365.2 | Detected   | 13636.1 | Detected   | 12948.8 | Detected   | 24788.4 | Detected   | Kif1c         | 1.725586835 | 0.90140061  | 1.81785115 | 0.949597   |           |
| A_51_P4061 | 5.1     | Not Detect | 7.8     | Not Detect | 25.7    | Detected   | 8.8     | Not Detect | Nxpe2         | 1.725490196 | 5.03921569  | 1.12820513 | 3.2948718  |           |
| A_55_P1966 | 294.3   | Detected   | 518.6   | Detected   | 515.9   | Detected   | 507.8   | Detected   | Apoa2         | 1.725450221 | 1.75297316  | 0.9791747  | 0.9947937  |           |
| A_55_P2363 | 46.9    | Detected   | 58.5    | Detected   | 58.1    | Detected   | 80.9    | Detected   | AI428898      | 1.724946695 | 1.23880597  | 1.38290598 | 0.9931624  |           |
| A_55_P1974 | 13693.2 | Detected   | 23289.8 | Detected   | 13557.6 | Detected   | 23619   | Detected   | Tsnax         | 1.724870739 | 0.99009727  | 1.01413494 | 0.5821261  |           |
| A_55_P2060 | 932.8   | Detected   | 1259.7  | Detected   | 1266.8  | Detected   | 1608.8  | Detected   | Trmt10b       | 1.724699828 | 1.35806175  | 1.27712948 | 1.0056363  |           |
| A_55_P2066 | 23090.2 | Detected   | 20452.4 | Detected   | 27017.3 | Detected   | 39804.7 | Detected   | Hid1          | 1.723878529 | 1.17007648  | 1.94621169 | 1.3209843  |           |
| A_52_P5215 | 274.1   | Detected   | 259     | Detected   | 430     | Detected   | 472.5   | Detected   | Isoc2a        | 1.723823422 | 1.56877052  | 1.82432432 | 1.6602317  |           |
| A_51_P4373 | 44.5    | Detected   | 56.9    | Detected   | 47.4    | Detected   | 76.7    | Detected   | Ascl1         | 1.723595506 | 1.06516854  | 1.34797891 | 0.8330404  |           |
| A_55_P1952 | 10329.4 | Detected   | 21146.4 | Detected   | 9147.1  | Detected   | 17802.3 | Detected   | Ppp3ca        | 1.723459252 | 0.8855403   | 0.84185961 | 0.4325606  |           |
| A_55_P2143 | 14.8    | Detected   | 26.6    | Detected   | 32.4    | Detected   | 25.5    | Not Detect | Rwdd3         | 1.722972973 | 2.18918919  | 0.95864662 | 1.2180451  |           |
| A_55_P2029 | 23512.9 | Detected   | 24632.3 | Detected   | 29638.7 | Detected   | 40502.1 | Detected   | Etfa          | 1.722548048 | 1.26052933  | 1.64426789 | 1.2032453  |           |
| A_52_P1767 | 314.6   | Detected   | 359.7   | Detected   | 416.6   | Detected   | 541.9   | Detected   | Lcorl         | 1.722504768 | 1.32422123  | 1.50653322 | 1.1581874  |           |
| A_51_P1615 | 246.9   | Detected   | 315.1   | Detected   | 246.9   | Detected   | 425.2   | Detected   | Arid3b        | 1.722154719 | 1           | 1.34941288 | 0.7835608  |           |
| A_51_P4060 | 37173.4 | Detected   | 37015.8 | Detected   | 38758.1 | Detected   | 64017.9 | Detected   | Abhd4         | 1.722142715 | 1.04262995  | 1.72947498 | 1.0470691  |           |

|            |         |            |         |          |         |          |         |            |               |             |            |            |           |
|------------|---------|------------|---------|----------|---------|----------|---------|------------|---------------|-------------|------------|------------|-----------|
| A_55_P2080 | 41.7    | Detected   | 62.1    | Detected | 34.1    | Detected | 71.8    | Detected   | Pskh1         | 1.721822542 | 0.8177458  | 1.15619968 | 0.5491143 |
| A_51_P3216 | 4743.2  | Detected   | 6613.7  | Detected | 4942.1  | Detected | 8166    | Detected   | Fam192a       | 1.721622533 | 1.04193372 | 1.23470977 | 0.7472519 |
| A_51_P5057 | 899.3   | Detected   | 1008.6  | Detected | 1020    | Detected | 1547.6  | Detected   | Tapbpl        | 1.720894029 | 1.1342155  | 1.53440412 | 1.0113028 |
| A_55_P2051 | 53.7    | Detected   | 44.9    | Detected | 43.8    | Detected | 92.4    | Detected   | Zfp518a       | 1.720670391 | 0.81564246 | 2.05790646 | 0.9755011 |
| A_51_P3103 | 861     | Detected   | 1173    | Detected | 1000.3  | Detected | 1481.4  | Detected   | Tk2           | 1.720557491 | 1.16178862 | 1.2629156  | 0.8527707 |
| A_55_P2073 | 8619    | Detected   | 11393.1 | Detected | 14423.8 | Detected | 14829.3 | Detected   | H2-Ke6        | 1.720536025 | 1.6734888  | 1.3016036  | 1.2660119 |
| A_55_P1960 | 151.3   | Detected   | 167.8   | Detected | 138.8   | Detected | 260.3   | Detected   | Kdm5b         | 1.720423001 | 0.91738268 | 1.55125149 | 0.8271752 |
| A_51_P2844 | 347.7   | Detected   | 497.5   | Detected | 287.9   | Detected | 598.1   | Detected   | 9530077C05Rik | 1.720161058 | 0.82801265 | 1.20221106 | 0.5786935 |
| A_52_P5289 | 2083.6  | Detected   | 2826.9  | Detected | 1700.5  | Detected | 3584    | Detected   | Eps15l1       | 1.720099827 | 0.81613553 | 1.26781987 | 0.6015423 |
| A_55_P1960 | 136.8   | Detected   | 190     | Detected | 110.6   | Detected | 235.3   | Detected   | Kdm5b         | 1.72002924  | 0.80847953 | 1.23842105 | 0.5821053 |
| A_51_P4508 | 4615.6  | Detected   | 6274.2  | Detected | 4968.7  | Detected | 7937.6  | Detected   | Cog4          | 1.719733079 | 1.07650143 | 1.26511747 | 0.7919257 |
| A_51_P2031 | 419     | Detected   | 455.8   | Detected | 472.2   | Detected | 720.5   | Detected   | Mbd4          | 1.719570406 | 1.12696897 | 1.58073717 | 1.0359807 |
| A_55_P2097 | 16.4    | Detected   | 17.3    | Detected | 26      | Detected | 28.2    | Not Detect | H2-T18        | 1.719512195 | 1.58536585 | 1.6300578  | 1.5028902 |
| A_66_P1316 | 15413.2 | Detected   | 37426.3 | Detected | 11721.6 | Detected | 26501.3 | Detected   | Otud4         | 1.719389874 | 0.76049101 | 0.70809297 | 0.3131915 |
| A_55_P2097 | 83.7    | Detected   | 65.7    | Detected | 98.7    | Detected | 143.9   | Detected   | Rabif         | 1.719235364 | 1.17921147 | 2.19025875 | 1.5022831 |
| A_51_P4796 | 37      | Detected   | 44.3    | Detected | 47.9    | Detected | 63.6    | Detected   | Cdnf          | 1.718918919 | 1.29459459 | 1.43566591 | 1.0812641 |
| A_52_P1884 | 432.2   | Detected   | 702.8   | Detected | 348.3   | Detected | 742.9   | Detected   | Prosc         | 1.718880148 | 0.80587691 | 1.05705748 | 0.4955891 |
| A_55_P1961 | 9842.2  | Detected   | 8345.6  | Detected | 10496.7 | Detected | 16915.7 | Detected   | Pnpla2        | 1.718690943 | 1.06649936 | 2.0269004  | 1.2577526 |
| A_55_P2219 | 127.9   | Detected   | 170.9   | Detected | 165.4   | Detected | 219.8   | Detected   | 1700113A16Rik | 1.718530102 | 1.29319781 | 1.28613224 | 0.9678174 |
| A_55_P1955 | 1180.9  | Detected   | 1089.5  | Detected | 1462    | Detected | 2029.3  | Detected   | Igflr1        | 1.718435092 | 1.23803878 | 1.86259752 | 1.3419    |
| A_55_P2066 | 2560.2  | Detected   | 1273    | Detected | 1487.2  | Detected | 4399.5  | Detected   | Orai2         | 1.718420436 | 0.58089212 | 3.45600943 | 1.1682639 |
| A_55_P2164 | 17307.7 | Detected   | 20524.2 | Detected | 27260.7 | Detected | 29741   | Detected   | D10Jhu81e     | 1.718368125 | 1.57506197 | 1.44906988 | 1.3282223 |
| A_55_P1979 | 1255.7  | Detected   | 1166.3  | Detected | 1137.3  | Detected | 2157.5  | Detected   | Cdkn2b        | 1.718165167 | 0.90570996 | 1.8498671  | 0.975135  |
| A_52_P3943 | 23862.7 | Detected   | 22263.9 | Detected | 33562.5 | Detected | 40997.7 | Detected   | Abcd3         | 1.718066271 | 1.40648376 | 1.84144287 | 1.5074852 |
| A_51_P2939 | 3492.3  | Detected   | 4513.8  | Detected | 5579.6  | Detected | 6000    | Detected   | Dhrs1         | 1.718065458 | 1.59768634 | 1.32925695 | 1.2361203 |
| A_55_P1975 | 223.1   | Detected   | 275.3   | Detected | 259.1   | Detected | 383.3   | Detected   | Acyp1         | 1.718063649 | 1.16136262 | 1.39229931 | 0.9411551 |
| A_55_P2064 | 13777   | Detected   | 15402.2 | Detected | 17273.6 | Detected | 23664.4 | Detected   | Prss53        | 1.717674385 | 1.25379981 | 1.53642986 | 1.1215021 |
| A_51_P1151 | 32332.8 | Detected   | 43968.7 | Detected | 44999.5 | Detected | 55526.6 | Detected   | Fam162a       | 1.717345853 | 1.39176007 | 1.26286654 | 1.0234439 |
| A_52_P2117 | 130.4   | Detected   | 88.4    | Detected | 119     | Detected | 223.9   | Detected   | Myo1d         | 1.71702454  | 0.91257669 | 2.53280543 | 1.3461538 |
| A_55_P2120 | 2680.5  | Detected   | 3630.9  | Detected | 2739.7  | Detected | 4602    | Detected   | Golga7        | 1.716843872 | 1.02208543 | 1.26745435 | 0.7545512 |
| A_52_P4268 | 1178.8  | Detected   | 1521    | Detected | 1454.3  | Detected | 2023.6  | Detected   | C230052I12Rik | 1.716661011 | 1.23371225 | 1.3304405  | 0.9561473 |
| A_55_P1963 | 21579.1 | Detected   | 26394.9 | Detected | 21593.3 | Detected | 37041.3 | Detected   | Cyb5b         | 1.716535907 | 1.00065804 | 1.40335065 | 0.8180861 |
| A_55_P2130 | 14.1    | Not Detect | 27      | Detected | 94.7    | Detected | 24.2    | Not Detect | 2210404O07Rik | 1.716312057 | 6.71631206 | 0.8962963  | 3.5074074 |
| A_66_P1088 | 5024.9  | Detected   | 7060    | Detected | 4840.9  | Detected | 8624.1  | Detected   | Pgls          | 1.716272961 | 0.96338236 | 1.22154391 | 0.6856799 |
| A_55_P2050 | 165.2   | Detected   | 193.3   | Detected | 195.9   | Detected | 283.5   | Detected   | Gm5785        | 1.716101695 | 1.18583535 | 1.46663218 | 1.0134506 |
| A_55_P2260 | 1239.5  | Detected   | 1429.7  | Detected | 1085    | Detected | 2126.9  | Detected   | 6330418K02Rik | 1.715933844 | 0.87535296 | 1.48765475 | 0.7589005 |
| A_66_P1130 | 17.6    | Detected   | 18.1    | Detected | 17.7    | Detected | 30.2    | Not Detect | Nlrc5         | 1.715909091 | 1.00568182 | 1.66850829 | 0.9779006 |
| A_51_P3748 | 17.6    | Detected   | 20      | Detected | 17.3    | Detected | 30.2    | Not Detect | Shd           | 1.715909091 | 0.98295455 | 1.51       | 0.865     |
| A_51_P2889 | 326.1   | Detected   | 317.4   | Detected | 189.2   | Detected | 559.5   | Detected   | Tmtc2         | 1.715731371 | 0.58019013 | 1.76275992 | 0.5960933 |
| A_55_P2099 | 21.1    | Detected   | 28.9    | Detected | 42.4    | Detected | 36.2    | Not Detect | Gdf1          | 1.71563981  | 2.00947867 | 1.25259516 | 1.467128  |

|            |                  |                  |                  |                  |               |             |            |            |           |
|------------|------------------|------------------|------------------|------------------|---------------|-------------|------------|------------|-----------|
| A_51_P3539 | 228.2 Detected   | 260.4 Detected   | 287.6 Detected   | 391.5 Detected   | Icam5         | 1.715600351 | 1.26029798 | 1.50345622 | 1.1044547 |
| A_55_P2053 | 1936.2 Detected  | 2541.5 Detected  | 3149.1 Detected  | 3321.6 Detected  | Sorbs1        | 1.715525256 | 1.62643322 | 1.30694472 | 1.2390714 |
| A_52_P3112 | 4987.1 Detected  | 4542.6 Detected  | 9730.1 Detected  | 8553.4 Detected  | Scarb2        | 1.715104971 | 1.95105372 | 1.88293048 | 2.1419672 |
| A_55_P1994 | 19.3 Detected    | 40.7 Detected    | 43.5 Detected    | 33.1 Not Detect  | Vamp1         | 1.715025907 | 2.25388601 | 0.81326781 | 1.0687961 |
| A_52_P6270 | 129 Detected     | 130.1 Detected   | 121.1 Detected   | 221.2 Detected   | Fam175a       | 1.714728682 | 0.93875969 | 1.70023059 | 0.9308224 |
| A_55_P2146 | 184.6 Detected   | 213.3 Detected   | 294.3 Detected   | 316.5 Detected   | Carns1        | 1.714517876 | 1.59425785 | 1.4838256  | 1.3797468 |
| A_52_P3818 | 1733.1 Detected  | 2487.7 Detected  | 1612.5 Detected  | 2971.3 Detected  | Terf2ip       | 1.714442329 | 0.93041371 | 1.19439643 | 0.6481891 |
| A_51_P3561 | 35 Detected      | 112.8 Detected   | 84.8 Detected    | 60 Detected      | Snai3         | 1.714285714 | 2.42285714 | 0.53191489 | 0.751773  |
| A_52_P2422 | 402 Detected     | 628.7 Detected   | 589.1 Detected   | 689 Detected     | Diexf         | 1.713930348 | 1.46542289 | 1.0959122  | 0.9370129 |
| A_55_P1962 | 35.3 Detected    | 36.5 Detected    | 14.5 Not Detect  | 60.5 Detected    | Fam131c       | 1.71388102  | 0.41076487 | 1.65753425 | 0.3972603 |
| A_51_P2759 | 3032.2 Detected  | 4671.6 Detected  | 5526.4 Detected  | 5195.1 Detected  | Dok1          | 1.713310468 | 1.82257107 | 1.11206011 | 1.182978  |
| A_52_P5663 | 2300.3 Detected  | 2491.2 Detected  | 3458.4 Detected  | 3940.8 Detected  | Map3k11       | 1.713167848 | 1.50345607 | 1.58188825 | 1.3882466 |
| A_52_P1102 | 1774.8 Detected  | 2554.4 Detected  | 2249.4 Detected  | 3040 Detected    | Wdr83         | 1.712869056 | 1.26741041 | 1.19010335 | 0.8805982 |
| A_55_P2021 | 10416 Detected   | 9426.9 Detected  | 18131.4 Detected | 17841.2 Detected | Cpped1        | 1.712864823 | 1.74072581 | 1.89258399 | 1.9233682 |
| A_52_P4969 | 2818.5 Detected  | 4530.1 Detected  | 2298.1 Detected  | 4827.3 Detected  | Acsbg1        | 1.712719532 | 0.81536278 | 1.06560562 | 0.5072956 |
| A_52_P2217 | 41.4 Detected    | 39.1 Detected    | 713.1 Detected   | 70.9 Detected    | Kif12         | 1.712560386 | 17.2246377 | 1.81329923 | 18.237852 |
| A_51_P1337 | 46.2 Detected    | 43.1 Detected    | 54.9 Detected    | 79.1 Detected    | Ppp1r3e       | 1.712121212 | 1.18831169 | 1.83526682 | 1.2737819 |
| A_55_P1983 | 27038.3 Detected | 69819.9 Detected | 20696.6 Detected | 46289.4 Detected | S100a4        | 1.711993727 | 0.76545493 | 0.6629829  | 0.2964284 |
| A_52_P6402 | 285.1 Detected   | 348.3 Detected   | 332.3 Detected   | 488 Detected     | Stam          | 1.711680112 | 1.16555595 | 1.40109101 | 0.9540626 |
| A_51_P4123 | 4385 Detected    | 3849.8 Detected  | 4703.5 Detected  | 7505.4 Detected  | Vps41         | 1.711607754 | 1.07263398 | 1.94955582 | 1.2217518 |
| A_52_P1899 | 319.3 Detected   | 241.8 Detected   | 450.9 Detected   | 546.5 Detected   | Lrrc1         | 1.71155653  | 1.41215158 | 2.26013234 | 1.8647643 |
| A_55_P2143 | 615 Detected     | 788.3 Detected   | 725.1 Detected   | 1052.6 Detected  | Dyrk1b        | 1.711544715 | 1.17902439 | 1.33527845 | 0.9198275 |
| A_66_P1375 | 651.6 Detected   | 796.8 Detected   | 698.1 Detected   | 1115.2 Detected  | Tle1          | 1.711479435 | 1.0713628  | 1.39959839 | 0.8761295 |
| A_52_P5977 | 2141.3 Detected  | 3368.4 Detected  | 3792.3 Detected  | 3664.5 Detected  | Ccdc84        | 1.711343576 | 1.77102695 | 1.08790524 | 1.1258461 |
| A_51_P1801 | 9915.7 Detected  | 13147.4 Detected | 15093 Detected   | 16961.4 Detected | Hist1h2ba     | 1.710560021 | 1.52213157 | 1.29009538 | 1.1479836 |
| A_55_P2402 | 38.3 Detected    | 35.4 Detected    | 40.3 Detected    | 65.5 Detected    | Mad2l2        | 1.710182768 | 1.05221932 | 1.85028249 | 1.1384181 |
| A_55_P2454 | 2962.5 Detected  | 3951.3 Detected  | 3713 Detected    | 5066.4 Detected  | Smim8         | 1.710177215 | 1.25333333 | 1.28221092 | 0.9396907 |
| A_51_P2448 | 269 Detected     | 481.8 Detected   | 296.4 Detected   | 459.9 Detected   | Dapp1         | 1.709665428 | 1.10185874 | 0.95454545 | 0.615193  |
| A_51_P2588 | 20.3 Detected    | 20 Detected      | 17.4 Not Detect  | 34.7 Not Detect  | 4933427G17Rik | 1.709359606 | 0.85714286 | 1.735      | 0.87      |
| A_51_P2887 | 25.1 Detected    | 14.8 Not Detect  | 22.7 Detected    | 42.9 Not Detect  | Myo18b        | 1.709163347 | 0.90438247 | 2.89864865 | 1.5337838 |
| A_55_P1960 | 92.8 Detected    | 115.4 Detected   | 177.8 Detected   | 158.6 Detected   | Prune         | 1.709051724 | 1.91594828 | 1.37435009 | 1.5407279 |
| A_55_P2100 | 37.8 Detected    | 59.3 Detected    | 82.9 Detected    | 64.6 Detected    | Dnah7b        | 1.708994709 | 2.19312169 | 1.08937605 | 1.3979764 |
| A_51_P2202 | 533.8 Detected   | 548 Detected     | 3645.3 Detected  | 912.1 Detected   | Ppp2r2b       | 1.708692394 | 6.82896216 | 1.66441606 | 6.6520073 |
| A_52_P5437 | 273.6 Detected   | 219.9 Detected   | 248.3 Detected   | 467.4 Detected   | Qrich1        | 1.708333333 | 0.90752924 | 2.1255116  | 1.1291496 |
| A_55_P2255 | 13.7 Not Detect  | 3.4 Not Detect   | 25.1 Detected    | 23.4 Not Detect  | A730021G18Rik | 1.708029197 | 1.83211679 | 6.88235294 | 7.3823529 |
| A_55_P2055 | 45.2 Detected    | 52.8 Detected    | 37 Detected      | 77.2 Detected    | Vmn1r52       | 1.707964602 | 0.81858407 | 1.46212121 | 0.7007576 |
| A_55_P1997 | 110.6 Detected   | 82.9 Detected    | 111 Detected     | 188.9 Detected   | Cpd           | 1.70795566  | 1.00361664 | 2.27864897 | 1.3389626 |
| A_52_P2397 | 74.3 Detected    | 87.9 Detected    | 67.5 Detected    | 126.9 Detected   | Sdf4          | 1.707940781 | 0.90847914 | 1.44368601 | 0.7679181 |
| A_51_P1747 | 172.5 Detected   | 230.9 Detected   | 235.9 Detected   | 294.6 Detected   | Krr1          | 1.707826087 | 1.36753623 | 1.275877   | 1.0216544 |
| A_55_P2138 | 1841.7 Detected  | 1843 Detected    | 2307.5 Detected  | 3145.3 Detected  | Tpk1          | 1.707824293 | 1.2529185  | 1.70661964 | 1.2520347 |



|            |         |            |         |            |         |            |         |            |               |             |            |            |           |
|------------|---------|------------|---------|------------|---------|------------|---------|------------|---------------|-------------|------------|------------|-----------|
| A_55_P2043 | 1208.5  | Detected   | 1949.4  | Detected   | 1720    | Detected   | 2063.3  | Detected   | Cops7a        | 1.707323128 | 1.42325197 | 1.05842823 | 0.8823228 |
| A_55_P2304 | 266     | Detected   | 288.1   | Detected   | 182.6   | Detected   | 454.1   | Detected   | 2700086A05Rik | 1.707142857 | 0.68646617 | 1.57618882 | 0.6338077 |
| A_55_P1973 | 15.7    | Detected   | 12.1    | Not Detect | 3.6     | Not Detect | 26.8    | Not Detect | Morn4         | 1.707006369 | 0.22929936 | 2.21487603 | 0.2975207 |
| A_55_P2064 | 2675.3  | Detected   | 3741.7  | Detected   | 2770.7  | Detected   | 4565.7  | Detected   | Gas2l3        | 1.706612343 | 1.03565955 | 1.22022076 | 0.7404923 |
| A_55_P2183 | 79.7    | Detected   | 89.7    | Detected   | 72.1    | Detected   | 136     | Detected   | Olf97         | 1.706398996 | 0.90464241 | 1.51616499 | 0.8037904 |
| A_55_P2169 | 94.1    | Detected   | 82.6    | Detected   | 120.6   | Detected   | 160.5   | Detected   | 4930515G01Rik | 1.705632306 | 1.2816153  | 1.94309927 | 1.4600484 |
| A_55_P1983 | 38878.1 | Detected   | 96155.2 | Detected   | 29430.2 | Detected   | 66301.8 | Detected   | S100a4        | 1.705376549 | 0.75698658 | 0.68952901 | 0.3060698 |
| A_51_P3248 | 2367.3  | Detected   | 3264.5  | Detected   | 3540.2  | Detected   | 4036.9  | Detected   | Cyb561a3      | 1.705276053 | 1.49545896 | 1.23660591 | 1.084454  |
| A_55_P1968 | 1443.7  | Detected   | 1114.5  | Detected   | 2166    | Detected   | 2461.8  | Detected   | Plekha6       | 1.705201912 | 1.5003117  | 2.20888291 | 1.9434724 |
| A_55_P1958 | 401.9   | Detected   | 771.9   | Detected   | 504.3   | Detected   | 685.3   | Detected   | Klra16        | 1.705150535 | 1.25478975 | 0.8878093  | 0.653323  |
| A_52_P3399 | 33590.5 | Detected   | 23881   | Detected   | 53334.8 | Detected   | 57270   | Detected   | Slc6a6        | 1.704946339 | 1.58779417 | 2.39814078 | 2.2333571 |
| A_52_P2174 | 24096.8 | Detected   | 26554.4 | Detected   | 31488.4 | Detected   | 41079   | Detected   | Ndufa6        | 1.704749178 | 1.30674612 | 1.54697527 | 1.1858072 |
| A_52_P1892 | 534.6   | Detected   | 703.7   | Detected   | 720.3   | Detected   | 911.3   | Detected   | Chid1         | 1.704638982 | 1.34736251 | 1.29501208 | 1.0235896 |
| A_51_P3318 | 204.1   | Detected   | 365.5   | Detected   | 219.8   | Detected   | 347.9   | Detected   | Ccdc122       | 1.70455659  | 1.07692308 | 0.95184679 | 0.601368  |
| A_55_P2016 | 1527    | Detected   | 4513.5  | Detected   | 2522.6  | Detected   | 2602.8  | Detected   | Sgcb          | 1.704518664 | 1.65199738 | 0.57666999 | 0.5589011 |
| A_55_P1990 | 66.9    | Detected   | 97.7    | Detected   | 93.3    | Detected   | 114     | Detected   | Shroom3       | 1.704035874 | 1.39461883 | 1.16683726 | 0.9549642 |
| A_55_P2029 | 12.5    | Not Detect | 24.3    | Detected   | 10.7    | Not Detect | 21.3    | Not Detect | Zfp287        | 1.704       | 0.856      | 0.87654321 | 0.4403292 |
| A_55_P2059 | 49.9    | Detected   | 51.8    | Detected   | 93.7    | Detected   | 85      | Detected   | Pnkd          | 1.703406814 | 1.87775551 | 1.64092664 | 1.8088803 |
| A_55_P1994 | 793.9   | Detected   | 606.6   | Detected   | 1122.6  | Detected   | 1352.1  | Detected   | Its1          | 1.703111223 | 1.41403199 | 2.22898121 | 1.8506429 |
| A_55_P2138 | 45.1    | Detected   | 53      | Detected   | 78.9    | Detected   | 76.8    | Detected   | Gm14483       | 1.702882483 | 1.74944568 | 1.4490566  | 1.4886792 |
| A_55_P2084 | 152.1   | Detected   | 111     | Detected   | 205.2   | Detected   | 259     | Detected   | Pigp          | 1.702827087 | 1.34911243 | 2.33333333 | 1.8486486 |
| A_52_P3373 | 136.6   | Detected   | 176.8   | Detected   | 89.9    | Detected   | 232.6   | Detected   | Kcnc3         | 1.702781845 | 0.65812592 | 1.31561086 | 0.5084842 |
| A_55_P2201 | 9871.9  | Detected   | 18488.7 | Detected   | 8766.2  | Detected   | 16809.4 | Detected   | Naf1          | 1.702752256 | 0.88799522 | 0.90917155 | 0.4741383 |
| A_55_P2043 | 1657.9  | Detected   | 2814.7  | Detected   | 1735    | Detected   | 2822.5  | Detected   | Zfp617        | 1.702454913 | 1.04650461 | 1.00277117 | 0.6164067 |
| A_51_P3690 | 28.9    | Detected   | 30.6    | Detected   | 33.7    | Detected   | 49.2    | Detected   | Taf4b         | 1.702422145 | 1.16608997 | 1.60784314 | 1.1013072 |
| A_51_P3176 | 2480.6  | Detected   | 3846.3  | Detected   | 3482.5  | Detected   | 4222.9  | Detected   | Zfp764        | 1.702370394 | 1.40389422 | 1.09791228 | 0.9054156 |
| A_51_P5027 | 4515.9  | Detected   | 5491.8  | Detected   | 7111.6  | Detected   | 7687.2  | Detected   | Hdac10        | 1.702252043 | 1.57479129 | 1.39975964 | 1.2949488 |
| A_55_P2142 | 460.4   | Detected   | 473.4   | Detected   | 454.3   | Detected   | 783.7   | Detected   | 4933434E20Rik | 1.702215465 | 0.98675065 | 1.65547106 | 0.9596536 |
| A_55_P2141 | 140.6   | Detected   | 156.2   | Detected   | 177.8   | Detected   | 239.3   | Detected   | Cdhr4         | 1.701991465 | 1.26458037 | 1.53201024 | 1.1382843 |
| A_55_P2028 | 17979   | Detected   | 17003.1 | Detected   | 22050.6 | Detected   | 30597.4 | Detected   | Idi1          | 1.701841037 | 1.22646421 | 1.79951891 | 1.2968576 |
| A_51_P4541 | 5350.9  | Detected   | 4819.2  | Detected   | 9332.4  | Detected   | 9106.3  | Detected   | Manba         | 1.701825861 | 1.74408044 | 1.88958748 | 1.936504  |
| A_51_P2910 | 1880.4  | Detected   | 635.3   | Detected   | 2238.6  | Detected   | 3199.8  | Detected   | Sel1l3        | 1.701659221 | 1.19049138 | 5.03667559 | 3.5236896 |
| A_51_P2261 | 1992.3  | Detected   | 2418.2  | Detected   | 2448.2  | Detected   | 3389.5  | Detected   | Dennd6a       | 1.701300005 | 1.228831   | 1.40166239 | 1.0124059 |
| A_52_P5197 | 38.5    | Detected   | 89.6    | Detected   | 19.7    | Detected   | 65.5    | Detected   | Ltk           | 1.701298701 | 0.51168831 | 0.73102679 | 0.2198661 |
| A_55_P2011 | 907.7   | Detected   | 778.9   | Detected   | 1071.1  | Detected   | 1544.1  | Detected   | Pyroxd1       | 1.701112702 | 1.18001542 | 1.98241109 | 1.3751444 |
| A_51_P3502 | 1244.5  | Detected   | 1126.7  | Detected   | 1325.7  | Detected   | 2117    | Detected   | Amz2          | 1.701084773 | 1.06524709 | 1.87893849 | 1.176622  |
| A_51_P4113 | 1193.9  | Detected   | 2257.5  | Detected   | 1094.4  | Detected   | 2030.7  | Detected   | Taf1c         | 1.700896222 | 0.91665969 | 0.89953488 | 0.4847841 |
| A_55_P2021 | 197.5   | Detected   | 152.5   | Detected   | 97      | Detected   | 335.9   | Detected   | Zbtb4         | 1.700759494 | 0.49113924 | 2.20262295 | 0.6360656 |
| A_55_P2145 | 105.8   | Detected   | 200.5   | Detected   | 89.1    | Detected   | 179.9   | Detected   | Krt86         | 1.700378072 | 0.84215501 | 0.89725686 | 0.444389  |
| A_55_P2069 | 3227.7  | Detected   | 6494.1  | Detected   | 3298    | Detected   | 5487.6  | Detected   | Large         | 1.700158007 | 1.02178022 | 0.84501317 | 0.5078456 |

|            |                   |                  |                   |                  |          |             |            |            |           |
|------------|-------------------|------------------|-------------------|------------------|----------|-------------|------------|------------|-----------|
| A_55_P2009 | 4756 Detected     | 5373.1 Detected  | 4710.6 Detected   | 8082.8 Detected  | Fbxo25   | 1.699495374 | 0.99045416 | 1.5043085  | 0.8767006 |
| A_55_P2071 | 70.5 Detected     | 85.1 Detected    | 106.8 Detected    | 119.8 Detected   | Atf1     | 1.69929078  | 1.51489362 | 1.40775558 | 1.2549941 |
| A_55_P2038 | 62.4 Detected     | 67.9 Detected    | 66.9 Detected     | 106 Detected     | Gareml   | 1.698717949 | 1.07211538 | 1.56111929 | 0.9852725 |
| A_51_P4687 | 4052.9 Detected   | 4804 Detected    | 6271.6 Detected   | 6884.5 Detected  | Alkbh6   | 1.698660219 | 1.54743517 | 1.4330766  | 1.3054954 |
| A_52_P9678 | 3783.3 Detected   | 3915.6 Detected  | 4525 Detected     | 6426.2 Detected  | Wasl     | 1.698570031 | 1.19604578 | 1.64117887 | 1.1556339 |
| A_55_P2008 | 310.8 Detected    | 583.1 Detected   | 689 Detected      | 527.9 Detected   | Cideb    | 1.698519949 | 2.21685972 | 0.90533356 | 1.1816155 |
| A_55_P2037 | 42.1 Detected     | 50.5 Detected    | 52.2 Detected     | 71.5 Detected    | Bmp10    | 1.698337292 | 1.23990499 | 1.41584158 | 1.0336634 |
| A_55_P2119 | 5.3 Not Detect    | 25.7 Detected    | 3.2 Not Detect    | 9 Not Detect     | Olfr16   | 1.698113208 | 0.60377358 | 0.35019455 | 0.1245136 |
| A_55_P2022 | 21220.7 Detected  | 23931.1 Detected | 33601.5 Detected  | 36034.9 Detected | Pura     | 1.698101382 | 1.58343033 | 1.505777   | 1.4040934 |
| A_52_P5705 | 147.8 Detected    | 124.9 Detected   | 135.2 Detected    | 250.9 Detected   | Sdk2     | 1.697564276 | 0.91474966 | 2.00880705 | 1.082466  |
| A_51_P3197 | 7878.8 Detected   | 12965.5 Detected | 10447.1 Detected  | 13374.1 Detected | Mrps31   | 1.697479312 | 1.32597604 | 1.0315144  | 0.8057614 |
| A_51_P3183 | 70.4 Detected     | 79.8 Detected    | 64.1 Detected     | 119.5 Detected   | Mtrr     | 1.697443182 | 0.91051136 | 1.49749373 | 0.8032581 |
| A_55_P2032 | 24.1 Detected     | 36.4 Detected    | 23.3 Detected     | 40.9 Not Detect  | Uggt2    | 1.697095436 | 0.96680498 | 1.12362637 | 0.6401099 |
| A_55_P2024 | 4398.9 Detected   | 6108.1 Detected  | 4260.8 Detected   | 7463.4 Detected  | Trrap    | 1.696651436 | 0.96860579 | 1.22188569 | 0.6975655 |
| A_55_P2156 | 964.1 Detected    | 1431.4 Detected  | 1019.7 Detected   | 1635.7 Detected  | Pms2     | 1.696608236 | 1.05767037 | 1.1427274  | 0.7123795 |
| A_51_P1243 | 274.5 Detected    | 283.5 Detected   | 269.1 Detected    | 465.7 Detected   | Cpne5    | 1.696539162 | 0.98032787 | 1.64268078 | 0.9492063 |
| A_51_P1546 | 322.9 Detected    | 236.4 Detected   | 503.9 Detected    | 547.8 Detected   | Tbc1d24  | 1.696500465 | 1.56054506 | 2.31725888 | 2.1315567 |
| A_66_P1270 | 42.8 Detected     | 58.5 Detected    | 43.8 Detected     | 72.6 Detected    | Gdf5     | 1.696261682 | 1.02336449 | 1.24102564 | 0.7487179 |
| A_66_P1317 | 47977.3 Detected  | 67728.1 Detected | 42534.4 Detected  | 81381.8 Detected | Znhit1   | 1.696256355 | 0.8865526  | 1.20159579 | 0.628017  |
| A_66_P1050 | 348.9 Detected    | 377.9 Detected   | 576.1 Detected    | 591.8 Detected   | Enpp5    | 1.696188019 | 1.65118945 | 1.56602276 | 1.5244774 |
| A_51_P4776 | 2575.9 Detected   | 2894.3 Detected  | 2127.3 Detected   | 4369.1 Detected  | Mcph1    | 1.696145037 | 0.82584728 | 1.50955326 | 0.7349964 |
| A_66_P1209 | 32.9 Detected     | 31.4 Detected    | 31 Detected       | 55.8 Detected    | Htr2a    | 1.696048632 | 0.94224924 | 1.77707006 | 0.9872611 |
| A_55_P1975 | 10048.6 Detected  | 9408 Detected    | 17591.8 Detected  | 17042.7 Detected | Cpped1   | 1.696027307 | 1.75067174 | 1.81151148 | 1.8698767 |
| A_51_P1148 | 3377.3 Detected   | 3520 Detected    | 2274.1 Detected   | 5727.5 Detected  | Cdh13    | 1.695881325 | 0.67334853 | 1.62713068 | 0.6460511 |
| A_55_P1962 | 138202.1 Detected | 109855 Detected  | 171208.1 Detected | 234348 Detected  | Plac8    | 1.695690586 | 1.23882416 | 2.13324837 | 1.5584916 |
| A_55_P1986 | 10666.4 Detected  | 18272 Detected   | 18146.3 Detected  | 18086.2 Detected | Ltv1     | 1.695623641 | 1.70125816 | 0.98983144 | 0.9931206 |
| A_55_P2056 | 18.7 Detected     | 38.3 Detected    | 22.7 Detected     | 31.7 Not Detect  | Speer4f  | 1.695187166 | 1.21390374 | 0.82767624 | 0.5926893 |
| A_55_P2098 | 16.4 Detected     | 16.5 Not Detect  | 26 Detected       | 27.8 Not Detect  | Gm10252  | 1.695121951 | 1.58536585 | 1.68484848 | 1.5757576 |
| A_51_P2017 | 22.6 Detected     | 33 Detected      | 29.1 Detected     | 38.3 Not Detect  | Olfr870  | 1.694690265 | 1.28761062 | 1.16060606 | 0.8818182 |
| A_66_P1386 | 483.9 Detected    | 445.9 Detected   | 519.2 Detected    | 819.9 Detected   | Whamm    | 1.694358338 | 1.07294896 | 1.83875308 | 1.1643866 |
| A_55_P2277 | 46.1 Detected     | 57.6 Detected    | 109.5 Detected    | 78.1 Detected    | Gm10134  | 1.694143167 | 2.37527115 | 1.35590278 | 1.9010417 |
| A_55_P2064 | 10267.3 Detected  | 12391.7 Detected | 16233.9 Detected  | 17393.8 Detected | Ctage5   | 1.694096793 | 1.58112649 | 1.40366536 | 1.3100624 |
| A_52_P3064 | 4.9 Not Detect    | 14.8 Detected    | 3.9 Not Detect    | 8.3 Not Detect   | Igkv4-86 | 1.693877551 | 0.79591837 | 0.56081081 | 0.2635135 |
| A_52_P1027 | 605.6 Detected    | 788.5 Detected   | 584.3 Detected    | 1025.7 Detected  | Dync2h1  | 1.693692206 | 0.96482827 | 1.30082435 | 0.7410273 |
| A_51_P1157 | 8.8 Not Detect    | 14.6 Not Detect  | 17.6 Detected     | 14.9 Not Detect  | Slc5a5   | 1.693181818 | 2          | 1.02054795 | 1.2054795 |
| A_52_P5995 | 117 Detected      | 37.7 Detected    | 165.2 Detected    | 198.1 Detected   | Rragb    | 1.693162393 | 1.41196581 | 5.25464191 | 4.3819629 |
| A_51_P2804 | 290.6 Detected    | 244.4 Detected   | 338.6 Detected    | 492 Detected     | Tcta     | 1.693048864 | 1.1651755  | 2.01309329 | 1.3854337 |
| A_66_P1086 | 2172.2 Detected   | 3806.5 Detected  | 4733.4 Detected   | 3677.3 Detected  | Cideb    | 1.692891999 | 2.17908112 | 0.96605806 | 1.2435045 |
| A_52_P5118 | 287.3 Detected    | 517.4 Detected   | 283.4 Detected    | 486.3 Detected   | Wdfy1    | 1.692655761 | 0.98642534 | 0.93989177 | 0.5477387 |
| A_55_P2085 | 8994.8 Detected   | 7073.6 Detected  | 15867 Detected    | 15224.1 Detected | BC029214 | 1.692544581 | 1.76401921 | 2.15224214 | 2.2431294 |

|            |                  |                  |                  |                  |               |             |            |            |           |
|------------|------------------|------------------|------------------|------------------|---------------|-------------|------------|------------|-----------|
| A_55_P2152 | 5.2 Not Detect   | 18.1 Detected    | 4.8 Not Detect   | 8.8 Not Detect   | Lce3a         | 1.692307692 | 0.92307692 | 0.48618785 | 0.2651934 |
| A_55_P2090 | 8219.4 Detected  | 12225.1 Detected | 12137.1 Detected | 13906.3 Detected | Fgfr1op2      | 1.691887486 | 1.47664063 | 1.13752035 | 0.9928017 |
| A_55_P2392 | 34.4 Detected    | 31.3 Detected    | 42.3 Detected    | 58.2 Detected    | D930001B02    | 1.691860465 | 1.22965116 | 1.85942492 | 1.3514377 |
| A_51_P2482 | 158 Detected     | 255.2 Detected   | 276.9 Detected   | 267.3 Detected   | Thoc1         | 1.691772152 | 1.75253165 | 1.04741379 | 1.0850313 |
| A_55_P2351 | 129.9 Detected   | 189.9 Detected   | 178 Detected     | 219.7 Detected   | 9030203C11Rik | 1.691301001 | 1.37028483 | 1.1569247  | 0.9373354 |
| A_55_P1962 | 4995.8 Detected  | 6431 Detected    | 5874.6 Detected  | 8449.3 Detected  | Rab8a         | 1.691280676 | 1.17590776 | 1.31383922 | 0.9134816 |
| A_55_P2071 | 8564.8 Detected  | 10679.2 Detected | 10563 Detected   | 14484.7 Detected | Abrac1        | 1.69118952  | 1.23330375 | 1.35634692 | 0.989119  |
| A_52_P3658 | 1002 Detected    | 1856.2 Detected  | 1441.7 Detected  | 1694.5 Detected  | Pa2g4         | 1.691117764 | 1.43882236 | 0.91288654 | 0.7766943 |
| A_51_P5156 | 96.8 Detected    | 66.2 Detected    | 172.9 Detected   | 163.7 Detected   | 1700001L05Rik | 1.691115702 | 1.78615702 | 2.47280967 | 2.6117825 |
| A_55_P2032 | 35.6 Detected    | 38.6 Detected    | 67.6 Detected    | 60.2 Detected    | E230008N13Rik | 1.691011236 | 1.8988764  | 1.55958549 | 1.7512953 |
| A_55_P2160 | 204.1 Detected   | 112.4 Detected   | 140.7 Detected   | 345.1 Detected   | Zcchc2        | 1.690837825 | 0.68936796 | 3.0702847  | 1.2517794 |
| A_51_P5213 | 1591.2 Detected  | 2360.6 Detected  | 2415.8 Detected  | 2690.4 Detected  | Nudt13        | 1.690799397 | 1.51822524 | 1.13971024 | 1.0233839 |
| A_55_P2192 | 130.2 Detected   | 165.5 Detected   | 126.8 Detected   | 220.1 Detected   | B930095G15Rik | 1.69047619  | 0.97388633 | 1.32990937 | 0.7661631 |
| A_55_P2075 | 1325.5 Detected  | 1602.5 Detected  | 2028.5 Detected  | 2240.7 Detected  | BC051226      | 1.690456432 | 1.5303659  | 1.39825273 | 1.2658346 |
| A_55_P2052 | 2887.3 Detected  | 2979.9 Detected  | 3737.4 Detected  | 4880.5 Detected  | Dguok         | 1.69033353  | 1.29442732 | 1.63780664 | 1.2542032 |
| A_55_P2037 | 2548 Detected    | 3255 Detected    | 2937.9 Detected  | 4305.3 Detected  | Pld3          | 1.689678179 | 1.15302198 | 1.32267281 | 0.9025806 |
| A_52_P4739 | 2132.1 Detected  | 3699.8 Detected  | 1089.8 Detected  | 3602.4 Detected  | Kdelr3        | 1.689601801 | 0.51113925 | 0.97367425 | 0.2945565 |
| A_55_P2359 | 1930.8 Detected  | 1777 Detected    | 1771.5 Detected  | 3261.7 Detected  | Dnajb14       | 1.689299772 | 0.91749534 | 1.83550929 | 0.9969049 |
| A_51_P1164 | 57947.4 Detected | 87532.7 Detected | 70462.5 Detected | 97884.1 Detected | Lsm4          | 1.689188816 | 1.21597345 | 1.11825752 | 0.8049849 |
| A_55_P2148 | 16.4 Detected    | 13 Not Detect    | 18.4 Not Detect  | 27.7 Not Detect  | Ptma          | 1.68902439  | 1.12195122 | 2.13076923 | 1.4153846 |
| A_51_P1897 | 1084.9 Detected  | 1280.4 Detected  | 846.2 Detected   | 1832.4 Detected  | Cabin1        | 1.689003595 | 0.77997972 | 1.43111528 | 0.6608872 |
| A_51_P1466 | 2949 Detected    | 3120.8 Detected  | 4556.1 Detected  | 4979.8 Detected  | Ptgr2         | 1.688640217 | 1.54496439 | 1.59568059 | 1.4599141 |
| A_52_P5658 | 19.9 Detected    | 22.5 Detected    | 17.6 Not Detect  | 33.6 Not Detect  | AU018091      | 1.688442211 | 0.88442211 | 1.49333333 | 0.7822222 |
| A_52_P2621 | 233.3 Detected   | 274.1 Detected   | 344.1 Detected   | 393.9 Detected   | Numb          | 1.688384055 | 1.47492499 | 1.43706676 | 1.2553812 |
| A_55_P2098 | 4132.3 Detected  | 5003.7 Detected  | 5477.2 Detected  | 6976.9 Detected  | Taf13         | 1.688381773 | 1.3254604  | 1.39434818 | 1.09463   |
| A_55_P2040 | 15818.1 Detected | 18146.5 Detected | 24071.3 Detected | 26705 Detected   | Bola3         | 1.688255859 | 1.52175672 | 1.47163365 | 1.3264982 |
| A_55_P1982 | 38.8 Detected    | 52.4 Detected    | 69 Detected      | 65.5 Detected    | 1700012L04Rik | 1.68814433  | 1.77835052 | 1.25       | 1.3167939 |
| A_55_P2053 | 1543.5 Detected  | 2717.7 Detected  | 1969.4 Detected  | 2605.5 Detected  | Tnfaip3       | 1.688046647 | 1.27593132 | 0.95871509 | 0.7246569 |
| A_55_P1975 | 14.1 Detected    | 23.6 Detected    | 9.3 Not Detect   | 23.8 Not Detect  | Syt3          | 1.687943262 | 0.65957447 | 1.00847458 | 0.3940678 |
| A_52_P4841 | 2283.6 Detected  | 4402.2 Detected  | 1942 Detected    | 3853.7 Detected  | Urb2          | 1.687554738 | 0.85041163 | 0.87540321 | 0.4411431 |
| A_65_P1371 | 92.7 Detected    | 102.4 Detected   | 67.5 Detected    | 156.4 Detected   | Ank3          | 1.687162891 | 0.72815534 | 1.52734375 | 0.6591797 |
| A_52_P5412 | 688.7 Detected   | 562.2 Detected   | 1273.6 Detected  | 1161.7 Detected  | Crebl2        | 1.68680122  | 1.84928125 | 2.0663465  | 2.265386  |
| A_66_P1011 | 46.5 Detected    | 63.6 Detected    | 79.2 Detected    | 78.4 Detected    | Hist1h2bp     | 1.686021505 | 1.70322581 | 1.2327044  | 1.245283  |
| A_51_P4218 | 7188.8 Detected  | 5868.3 Detected  | 9623.3 Detected  | 12119.4 Detected | Ech1          | 1.685872468 | 1.33865179 | 2.06523184 | 1.6398787 |
| A_52_P1831 | 3044.6 Detected  | 2962.6 Detected  | 4076.5 Detected  | 5132.8 Detected  | Adar          | 1.685870065 | 1.33892794 | 1.73253224 | 1.3759873 |
| A_51_P2455 | 2006.2 Detected  | 2148.8 Detected  | 1832.2 Detected  | 3381.8 Detected  | Synrg         | 1.685674409 | 0.91326887 | 1.57380864 | 0.852662  |
| A_51_P2888 | 190.8 Detected   | 81.4 Detected    | 291.1 Detected   | 321.6 Detected   | Tmem45a       | 1.685534591 | 1.52568134 | 3.95085995 | 3.5761671 |
| A_55_P2062 | 12.4 Not Detect  | 15.3 Not Detect  | 16.9 Detected    | 20.9 Not Detect  | Dpysl5        | 1.685483871 | 1.36290323 | 1.36601307 | 1.1045752 |
| A_55_P1983 | 30.2 Detected    | 56.8 Detected    | 34.1 Detected    | 50.9 Not Detect  | Insrr         | 1.685430464 | 1.12913907 | 0.89612676 | 0.6003521 |
| A_55_P2080 | 106.7 Detected   | 153.3 Detected   | 155.7 Detected   | 179.8 Detected   | Dph3          | 1.685098407 | 1.45923149 | 1.17286367 | 1.0156556 |

|            |         |            |         |            |         |            |         |            |               |             |            |            |           |
|------------|---------|------------|---------|------------|---------|------------|---------|------------|---------------|-------------|------------|------------|-----------|
| A_55_P2066 | 294.9   | Detected   | 313.8   | Detected   | 375.8   | Detected   | 496.9   | Detected   | Dffa          | 1.684977959 | 1.27433028 | 1.58349267 | 1.1975781 |
| A_65_P0515 | 215.5   | Detected   | 59.5    | Detected   | 4.4     | Not Detect | 363.1   | Detected   | Flrt2         | 1.684918794 | 0.02041763 | 6.10252101 | 0.0739496 |
| A_55_P1980 | 2911.3  | Detected   | 2886.7  | Detected   | 4115.2  | Detected   | 4905.3  | Detected   | Acad11        | 1.684917391 | 1.4135266  | 1.69927599 | 1.4255725 |
| A_52_P6333 | 11875.3 | Detected   | 20557   | Detected   | 12923.6 | Detected   | 20008.5 | Detected   | Prosc         | 1.68488375  | 1.08827566 | 0.97331809 | 0.6286715 |
| A_55_P1998 | 988.5   | Detected   | 1327.4  | Detected   | 1499.7  | Detected   | 1665    | Detected   | Chchd3        | 1.684370258 | 1.51714719 | 1.25433178 | 1.1298026 |
| A_55_P2076 | 2334.5  | Detected   | 2659.1  | Detected   | 2973.4  | Detected   | 3931.4  | Detected   | Vps25         | 1.684043692 | 1.27367745 | 1.47847016 | 1.1181979 |
| A_55_P2130 | 14780.1 | Detected   | 18701.7 | Detected   | 26394.6 | Detected   | 24890.3 | Detected   | Dcaf11        | 1.68404138  | 1.78582012 | 1.33091109 | 1.4113476 |
| A_55_P2000 | 474.3   | Detected   | 625.2   | Detected   | 761.9   | Detected   | 798.6   | Detected   | Sreb2         | 1.683744466 | 1.60636728 | 1.27735125 | 1.21865   |
| A_55_P2147 | 14890   | Detected   | 16039.2 | Detected   | 16562.8 | Detected   | 25068.5 | Detected   | A430005L14Rik | 1.683579584 | 1.11234385 | 1.56295202 | 1.032645  |
| A_55_P2183 | 166.3   | Detected   | 186.2   | Detected   | 137.1   | Detected   | 279.9   | Detected   | Pds5b         | 1.683102826 | 0.82441371 | 1.50322234 | 0.736305  |
| A_55_P2215 | 42.6    | Detected   | 28.5    | Detected   | 49.7    | Detected   | 71.7    | Detected   | 4930515115    | 1.683098592 | 1.16666667 | 2.51578947 | 1.7438596 |
| A_55_P2130 | 1442.7  | Detected   | 2044.9  | Detected   | 1882.9  | Detected   | 2427.8  | Detected   | Ncoa1         | 1.68281694  | 1.30512234 | 1.18724632 | 0.9207785 |
| A_51_P2454 | 330.9   | Detected   | 588     | Detected   | 284.2   | Detected   | 556.8   | Detected   | Ppp3cc        | 1.68268359  | 0.85886975 | 0.94693878 | 0.4833333 |
| A_55_P1991 | 13649.3 | Detected   | 16547.8 | Detected   | 21681.6 | Detected   | 22964.6 | Detected   | D10Jhu81e     | 1.682474559 | 1.58847706 | 1.3877736  | 1.3102406 |
| A_51_P1252 | 47340   | Detected   | 70006.7 | Detected   | 74152.7 | Detected   | 79645   | Detected   | Acaa2         | 1.682403887 | 1.56638572 | 1.13767682 | 1.0592229 |
| A_55_P2007 | 1553.5  | Detected   | 2381.6  | Detected   | 2292.6  | Detected   | 2613.6  | Detected   | Nt5dc1        | 1.682394593 | 1.4757644  | 1.0974135  | 0.9626302 |
| A_66_P1097 | 46.9    | Detected   | 56.9    | Detected   | 36.6    | Detected   | 78.9    | Detected   | A430033K04Rik | 1.682302772 | 0.7803838  | 1.38664323 | 0.6432337 |
| A_52_P1039 | 21.4    | Detected   | 10.9    | Not Detect | 21.1    | Detected   | 36      | Not Detect | Htr1b         | 1.682242991 | 0.98598131 | 3.30275229 | 1.9357798 |
| A_55_P1953 | 194.1   | Detected   | 244     | Detected   | 193.7   | Detected   | 326.5   | Detected   | Rab13         | 1.682122617 | 0.99793921 | 1.33811475 | 0.7938525 |
| A_51_P4531 | 11212.4 | Detected   | 15115.3 | Detected   | 11560.8 | Detected   | 18855.8 | Detected   | Carkd         | 1.681691698 | 1.03107274 | 1.24746449 | 0.7648409 |
| A_51_P2093 | 34889.2 | Detected   | 53088   | Detected   | 48037.7 | Detected   | 58667.9 | Detected   | Sc4mol        | 1.681549018 | 1.37686447 | 1.10510662 | 0.9048693 |
| A_51_P5116 | 315.5   | Detected   | 339     | Detected   | 502.6   | Detected   | 530.5   | Detected   | Ttc38         | 1.681458003 | 1.59302694 | 1.56489676 | 1.4825959 |
| A_55_P1960 | 68.7    | Detected   | 118.1   | Detected   | 72.4    | Detected   | 115.5   | Detected   | Gm11710       | 1.681222707 | 1.05385735 | 0.97798476 | 0.6130398 |
| A_55_P1976 | 2941.7  | Detected   | 4167.2  | Detected   | 3814.5  | Detected   | 4945.4  | Detected   | Isca2         | 1.681136758 | 1.29669919 | 1.1867441  | 0.9153628 |
| A_51_P3425 | 6598.9  | Detected   | 8326.8  | Detected   | 6419.6  | Detected   | 11093.5 | Detected   | Rnf166        | 1.681113519 | 0.9728288  | 1.3322645  | 0.7709564 |
| A_52_P2289 | 207.7   | Detected   | 334.5   | Detected   | 328.3   | Detected   | 349.1   | Detected   | Shprh         | 1.6807896   | 1.58064516 | 1.04364723 | 0.9814649 |
| A_55_P2049 | 80.1    | Detected   | 81      | Detected   | 138.1   | Detected   | 134.6   | Detected   | Gm10629       | 1.680399501 | 1.72409488 | 1.6617284  | 1.7049383 |
| A_52_P5337 | 2323.9  | Detected   | 2563.5  | Detected   | 2744    | Detected   | 3904.6  | Detected   | Ankrd40       | 1.680192779 | 1.1807737  | 1.52315194 | 1.0704115 |
| A_55_P2058 | 877.3   | Detected   | 1046.1  | Detected   | 984.4   | Detected   | 1473.9  | Detected   | Slc35d1       | 1.680041035 | 1.12207911 | 1.40894752 | 0.941019  |
| A_55_P1999 | 49.3    | Detected   | 80.1    | Detected   | 67.2    | Detected   | 82.8    | Detected   | Gm14499       | 1.679513185 | 1.36308316 | 1.03370787 | 0.8389513 |
| A_55_P2211 | 184.4   | Detected   | 143.5   | Detected   | 153.3   | Detected   | 309.7   | Detected   | 6720474J12Rik | 1.679501085 | 0.8313449  | 2.15818815 | 1.0682927 |
| A_55_P2088 | 6297.2  | Detected   | 6549.9  | Detected   | 9339.9  | Detected   | 10575.2 | Detected   | Deb1          | 1.679349552 | 1.483183   | 1.614559   | 1.4259607 |
| A_52_P4812 | 280.5   | Detected   | 366.8   | Detected   | 781.2   | Detected   | 471     | Detected   | Drc1          | 1.679144385 | 2.78502674 | 1.28407852 | 2.129771  |
| A_51_P2939 | 100.9   | Detected   | 99.6    | Detected   | 131.4   | Detected   | 169.4   | Detected   | Senp6         | 1.67888999  | 1.30227948 | 1.70080321 | 1.3192771 |
| A_51_P4279 | 25.2    | Detected   | 35.2    | Detected   | 31.5    | Detected   | 42.3    | Not Detect | Il31ra        | 1.678571429 | 1.25       | 1.20170455 | 0.8948864 |
| A_55_P2290 | 450.2   | Detected   | 358.9   | Detected   | 353.7   | Detected   | 755.6   | Detected   | 2310076G05Rik | 1.678365171 | 0.78565082 | 2.10532182 | 0.9855113 |
| A_55_P2363 | 57.8    | Detected   | 62.6    | Detected   | 56.5    | Detected   | 97      | Detected   | 1700007J24Rik | 1.678200692 | 0.97750865 | 1.54952077 | 0.9025559 |
| A_55_P1955 | 78.3    | Detected   | 133.8   | Detected   | 158.2   | Detected   | 131.4   | Detected   | Bbs1          | 1.67816092  | 2.02043423 | 0.98206278 | 1.1823617 |
| A_55_P2174 | 246.1   | Detected   | 311.3   | Detected   | 52.8    | Detected   | 412.9   | Detected   | Vldlr         | 1.677773263 | 0.21454693 | 1.32637327 | 0.1696113 |
| A_55_P2278 | 12.4    | Not Detect | 22.8    | Detected   | 15.4    | Not Detect | 20.8    | Not Detect | AI480461      | 1.677419355 | 1.24193548 | 0.9122807  | 0.6754386 |

|            |         |            |         |            |         |            |         |            |               |             |            |            |           |
|------------|---------|------------|---------|------------|---------|------------|---------|------------|---------------|-------------|------------|------------|-----------|
| A_55_P2039 | 75.8    | Detected   | 91.3    | Detected   | 66.9    | Detected   | 127.1   | Detected   | Rprd2         | 1.676781003 | 0.88258575 | 1.39211391 | 0.7327492 |
| A_55_P2153 | 228.6   | Detected   | 267.7   | Detected   | 150.6   | Detected   | 383.3   | Detected   | Zfp655        | 1.676727909 | 0.65879265 | 1.43182667 | 0.56257   |
| A_55_P2151 | 334.8   | Detected   | 273.4   | Detected   | 450.3   | Detected   | 561.2   | Detected   | Ccdc50        | 1.676224612 | 1.34498208 | 2.05267008 | 1.6470373 |
| A_51_P4725 | 1596.1  | Detected   | 1464.9  | Detected   | 1903    | Detected   | 2675.4  | Detected   | Capn1         | 1.676210764 | 1.19228119 | 1.82633627 | 1.2990648 |
| A_55_P2132 | 6645.1  | Detected   | 8296.3  | Detected   | 8371.3  | Detected   | 11138.1 | Detected   | Gmppa         | 1.676137304 | 1.25977036 | 1.34253824 | 1.0090402 |
| A_55_P2049 | 39.5    | Detected   | 49.3    | Detected   | 21.2    | Detected   | 66.2    | Detected   | Phtf2         | 1.675949367 | 0.53670886 | 1.34279919 | 0.4300203 |
| A_55_P2116 | 46.9    | Detected   | 44.8    | Detected   | 48      | Detected   | 78.6    | Detected   | Zfp219        | 1.675906183 | 1.02345416 | 1.75446429 | 1.0714286 |
| A_51_P4895 | 146.4   | Detected   | 94      | Detected   | 697.5   | Detected   | 245.3   | Detected   | Ctla2b        | 1.675546448 | 4.76434426 | 2.60957447 | 7.4202128 |
| A_55_P2184 | 10805.9 | Detected   | 16283.1 | Detected   | 11163.5 | Detected   | 18105.6 | Detected   | Zfp330        | 1.675529109 | 1.03309303 | 1.11192586 | 0.6855881 |
| A_51_P4573 | 5610    | Detected   | 6580    | Detected   | 7458.9  | Detected   | 9399    | Detected   | Hmgn5         | 1.67540107  | 1.32957219 | 1.42841945 | 1.1335714 |
| A_55_P2032 | 6587.1  | Detected   | 6412.8  | Detected   | 9795.3  | Detected   | 11035.1 | Detected   | Gm10767       | 1.675259219 | 1.48704286 | 1.72079279 | 1.5274607 |
| A_55_P2083 | 183.5   | Detected   | 225.7   | Detected   | 216.2   | Detected   | 307.3   | Detected   | Lpin1         | 1.674659401 | 1.17820163 | 1.36154187 | 0.9579087 |
| A_52_P4070 | 63.9    | Detected   | 80.3    | Detected   | 77.3    | Detected   | 107     | Detected   | Rab5b         | 1.674491393 | 1.20970266 | 1.33250311 | 0.9626401 |
| A_55_P2026 | 11103.6 | Detected   | 14024   | Detected   | 17454.4 | Detected   | 18590.5 | Detected   | Cdkn1b        | 1.674276811 | 1.57195864 | 1.32562037 | 1.2446092 |
| A_55_P2253 | 710.3   | Detected   | 885.7   | Detected   | 720.7   | Detected   | 1189.2  | Detected   | 1700025L06Rik | 1.67422216  | 1.0146417  | 1.34266682 | 0.8137067 |
| A_55_P1984 | 4845.7  | Detected   | 3302.2  | Detected   | 5492.3  | Detected   | 8112    | Detected   | Cpne2         | 1.674061539 | 1.13343789 | 2.45654412 | 1.6632245 |
| A_51_P2898 | 4357.8  | Detected   | 4838.6  | Detected   | 7325.6  | Detected   | 7294.8  | Detected   | Txndc12       | 1.673963927 | 1.68103171 | 1.50762617 | 1.5139917 |
| A_55_P2350 | 29.4    | Detected   | 36.4    | Detected   | 36.4    | Detected   | 49.2    | Not Detect | A530072M11Rik | 1.673469388 | 1.23809524 | 1.35164835 | 1         |
| A_55_P2045 | 136.5   | Detected   | 186.4   | Detected   | 135.2   | Detected   | 228.4   | Detected   | Eps15l1       | 1.673260073 | 0.99047619 | 1.22532189 | 0.7253219 |
| A_55_P2376 | 15.6    | Not Detect | 7.5     | Not Detect | 23.7    | Detected   | 26.1    | Not Detect | A230057D06Rik | 1.673076923 | 1.51923077 | 3.48       | 3.16      |
| A_55_P1966 | 58.7    | Detected   | 50.3    | Detected   | 72      | Detected   | 98.2    | Detected   | Ren1          | 1.672913118 | 1.22657581 | 1.95228628 | 1.4314115 |
| A_51_P2323 | 1808.9  | Detected   | 1525.6  | Detected   | 6453.4  | Detected   | 3025.9  | Detected   | Acy3          | 1.672784565 | 3.56758251 | 1.98341636 | 4.2300734 |
| A_55_P2079 | 5.5     | Not Detect | 24.7    | Detected   | 4.7     | Not Detect | 9.2     | Not Detect | 4930524N10Rik | 1.672727273 | 0.85454545 | 0.37246964 | 0.1902834 |
| A_51_P2193 | 2070.4  | Detected   | 3082.6  | Detected   | 2228.7  | Detected   | 3462.8  | Detected   | Ddx28         | 1.672527048 | 1.07645866 | 1.12333744 | 0.7229936 |
| A_55_P2389 | 214.4   | Detected   | 151.6   | Detected   | 188.4   | Detected   | 358.5   | Detected   | D130061D10Rik | 1.672108209 | 0.87873134 | 2.36477573 | 1.2427441 |
| A_66_P1381 | 37442.2 | Detected   | 45236.7 | Detected   | 52947.7 | Detected   | 62607   | Detected   | Pnp           | 1.672097259 | 1.41411829 | 1.3839869  | 1.1704589 |
| A_51_P3499 | 25      | Detected   | 16.9    | Detected   | 18.3    | Detected   | 41.8    | Not Detect | Gc            | 1.672       | 0.732      | 2.47337278 | 1.0828402 |
| A_51_P3889 | 735.9   | Detected   | 690.7   | Detected   | 1153.4  | Detected   | 1230.4  | Detected   | Zhx1          | 1.6719663   | 1.56733252 | 1.78138121 | 1.6699001 |
| A_55_P2127 | 26.2    | Detected   | 32.2    | Detected   | 20.8    | Detected   | 43.8    | Not Detect | Smcr8         | 1.671755725 | 0.79389313 | 1.36024845 | 0.6459627 |
| A_55_P2113 | 81.2    | Detected   | 87.3    | Detected   | 100.5   | Detected   | 135.7   | Detected   | Whsc1         | 1.671182266 | 1.23768473 | 1.55441008 | 1.1512027 |
| A_55_P1961 | 12998   | Detected   | 15664.3 | Detected   | 26627.1 | Detected   | 21719   | Detected   | Atg4d         | 1.670949377 | 2.04855362 | 1.3865286  | 1.6998589 |
| A_55_P1963 | 32.5    | Detected   | 49      | Detected   | 32.4    | Detected   | 54.3    | Detected   | Guca1b        | 1.670769231 | 0.99692308 | 1.10816327 | 0.6612245 |
| A_55_P2129 | 135     | Detected   | 165.4   | Detected   | 154     | Detected   | 225.5   | Detected   | Gm3807        | 1.67037037  | 1.14074074 | 1.36336155 | 0.9310762 |
| A_55_P2040 | 452     | Detected   | 457.6   | Detected   | 627.9   | Detected   | 755     | Detected   | Guf1          | 1.670353982 | 1.38915929 | 1.64991259 | 1.3721591 |
| A_55_P2001 | 664.1   | Detected   | 732.1   | Detected   | 533.5   | Detected   | 1109.2  | Detected   | Stx18         | 1.670230387 | 0.80334287 | 1.51509357 | 0.7287256 |
| A_55_P2045 | 61.4    | Detected   | 80      | Detected   | 89.3    | Detected   | 102.5   | Detected   | Stmn4         | 1.669381107 | 1.45439739 | 1.28125    | 1.11625   |
| A_51_P1142 | 345.1   | Detected   | 433.7   | Detected   | 356.8   | Detected   | 576.1   | Detected   | Ccdc57        | 1.669371197 | 1.03390322 | 1.32833756 | 0.8226885 |
| A_66_P1027 | 74.1    | Detected   | 56.9    | Detected   | 146.3   | Detected   | 123.7   | Detected   | 2700012120Rik | 1.669365722 | 1.97435897 | 2.17398946 | 2.5711775 |
| A_55_P2295 | 39      | Detected   | 55.7    | Detected   | 56.9    | Detected   | 65.1    | Detected   | Elmo3         | 1.669230769 | 1.45897436 | 1.16876122 | 1.021544  |
| A_66_P1187 | 148.1   | Detected   | 147.4   | Detected   | 235.9   | Detected   | 247.2   | Detected   | Swsap1        | 1.669142471 | 1.59284267 | 1.6770692  | 1.6004071 |

|            |         |            |         |            |         |            |         |            |               |             |            |            |           |
|------------|---------|------------|---------|------------|---------|------------|---------|------------|---------------|-------------|------------|------------|-----------|
| A_52_P3306 | 1673.8  | Detected   | 2157.5  | Detected   | 1770.2  | Detected   | 2793.7  | Detected   | Tle1          | 1.669076353 | 1.0575935  | 1.29487833 | 0.8204867 |
| A_55_P2174 | 1578.7  | Detected   | 1380.2  | Detected   | 3815.5  | Detected   | 2634.8  | Detected   | Plekha7       | 1.668968138 | 2.41686198 | 1.9089987  | 2.7644544 |
| A_52_P3562 | 32.6    | Detected   | 23.9    | Detected   | 49.2    | Detected   | 54.4    | Detected   | Slc38a9       | 1.668711656 | 1.50920245 | 2.27615063 | 2.0585774 |
| A_52_P1142 | 131.8   | Detected   | 220.1   | Detected   | 436.2   | Detected   | 219.9   | Detected   | C1rb          | 1.668437026 | 3.30955994 | 0.99909132 | 1.9818264 |
| A_55_P2047 | 10276.1 | Detected   | 15226.9 | Detected   | 9704.9  | Detected   | 17144.1 | Detected   | Tspan7        | 1.668346941 | 0.94441471 | 1.12590875 | 0.6373523 |
| A_51_P2891 | 19.9    | Detected   | 25.4    | Detected   | 19      | Not Detect | 33.2    | Not Detect | Hrh3          | 1.668341709 | 0.95477387 | 1.30708661 | 0.7480315 |
| A_51_P4165 | 20.5    | Detected   | 13.6    | Not Detect | 19.4    | Detected   | 34.2    | Not Detect | Ctsg          | 1.668292683 | 0.94634146 | 2.51470588 | 1.4264706 |
| A_51_P2406 | 15342.4 | Detected   | 10487.5 | Detected   | 14384.2 | Detected   | 25587   | Detected   | Tecpr1        | 1.667731255 | 0.93754563 | 2.43976162 | 1.3715566 |
| A_66_P1263 | 5081.3  | Detected   | 4645.9  | Detected   | 6003.9  | Detected   | 8473.7  | Detected   | BC030870      | 1.667624427 | 1.18156771 | 1.82390925 | 1.2923007 |
| A_65_P0164 | 35115.2 | Detected   | 37304.7 | Detected   | 32791.3 | Detected   | 58549.5 | Detected   | Rnf6          | 1.667354878 | 0.93382068 | 1.56949392 | 0.8790126 |
| A_51_P4677 | 5277    | Detected   | 5114.2  | Detected   | 5812.8  | Detected   | 8798.4  | Detected   | Hgsnat        | 1.667310972 | 1.10153496 | 1.72038638 | 1.1366001 |
| A_55_P2099 | 8785.4  | Detected   | 8539.5  | Detected   | 13763.9 | Detected   | 14647.7 | Detected   | Msantd4       | 1.667277529 | 1.56667881 | 1.71528778 | 1.6117923 |
| A_51_P2059 | 2528.1  | Detected   | 2865.3  | Detected   | 4144.1  | Detected   | 4214.2  | Detected   | Snx15         | 1.666943554 | 1.63921522 | 1.47077095 | 1.4463058 |
| A_55_P2030 | 3315.6  | Detected   | 4080.1  | Detected   | 652.6   | Detected   | 5526.6  | Detected   | Vldlr         | 1.666847629 | 0.19682712 | 1.35452562 | 0.1599471 |
| A_51_P2309 | 3007.2  | Detected   | 375.6   | Detected   | 3071    | Detected   | 5012.2  | Detected   | Pi4k2b        | 1.666733174 | 1.02121575 | 13.3445154 | 8.1762513 |
| A_51_P3904 | 11.7    | Not Detect | 16.4    | Not Detect | 26.7    | Detected   | 19.5    | Not Detect | Hyal3         | 1.666666667 | 2.28205128 | 1.18902439 | 1.6280488 |
| A_55_P2179 | 15668   | Detected   | 20321.9 | Detected   | 22798   | Detected   | 26109.2 | Detected   | Mrpl23        | 1.666402859 | 1.45506765 | 1.28478144 | 1.1218439 |
| A_55_P1988 | 106.4   | Detected   | 165.3   | Detected   | 101.5   | Detected   | 177.3   | Detected   | Nek1          | 1.666353383 | 0.95394737 | 1.07259528 | 0.6140351 |
| A_51_P2545 | 6297.2  | Detected   | 6589.8  | Detected   | 9566.9  | Detected   | 10492.1 | Detected   | Foxred1       | 1.666153211 | 1.51923077 | 1.59217275 | 1.451774  |
| A_55_P2171 | 1135.9  | Detected   | 1007    | Detected   | 2154.4  | Detected   | 1892.4  | Detected   | Tm7sf2        | 1.665991725 | 1.89664583 | 1.87924528 | 2.139424  |
| A_51_P3486 | 7745    | Detected   | 14144.8 | Detected   | 8557.2  | Detected   | 12903   | Detected   | 2310045N01Rik | 1.66597805  | 1.10486766 | 0.91220802 | 0.6049714 |
| A_52_P3197 | 121.5   | Detected   | 92.3    | Detected   | 79.2    | Detected   | 202.4   | Detected   | Cdc14a        | 1.665843621 | 0.65185185 | 2.1928494  | 0.8580715 |
| A_51_P1993 | 40.1    | Detected   | 28.5    | Detected   | 25.3    | Detected   | 66.8    | Detected   | Tet3          | 1.665835411 | 0.63092269 | 2.34385965 | 0.8877193 |
| A_55_P1961 | 26.3    | Detected   | 43.4    | Detected   | 44.9    | Detected   | 43.8    | Not Detect | 4930429B21Rik | 1.66539924  | 1.70722433 | 1.00921659 | 1.0345622 |
| A_55_P2015 | 288.1   | Detected   | 293.4   | Detected   | 245.2   | Detected   | 479.8   | Detected   | Yipf6         | 1.66539396  | 0.85109337 | 1.63531016 | 0.8357192 |
| A_55_P2056 | 1232    | Detected   | 1147.8  | Detected   | 1340.1  | Detected   | 2051.7  | Detected   | Hfe           | 1.665340909 | 1.08774351 | 1.78750653 | 1.1675379 |
| A_51_P3843 | 1501    | Detected   | 2813.3  | Detected   | 5253.3  | Detected   | 2499.4  | Detected   | C1ra          | 1.665156562 | 3.49986676 | 0.88842285 | 1.8673089 |
| A_51_P2984 | 2920    | Detected   | 3731    | Detected   | 2956.2  | Detected   | 4862.1  | Detected   | Cog6          | 1.66510274  | 1.01239726 | 1.30316269 | 0.7923345 |
| A_55_P2097 | 12822.3 | Detected   | 13392.4 | Detected   | 16948.9 | Detected   | 21350.4 | Detected   | Sgsm3         | 1.665099085 | 1.32182994 | 1.59421762 | 1.2655611 |
| A_51_P2689 | 2136.4  | Detected   | 2236.4  | Detected   | 2952    | Detected   | 3556.5  | Detected   | Mon1a         | 1.664716345 | 1.38176371 | 1.59027902 | 1.3199785 |
| A_51_P3518 | 98.4    | Detected   | 127.3   | Detected   | 123.1   | Detected   | 163.8   | Detected   | C1qb          | 1.664634146 | 1.25101626 | 1.28672427 | 0.9670071 |
| A_51_P2810 | 2943.7  | Detected   | 2678.4  | Detected   | 3053.1  | Detected   | 4899.6  | Detected   | Rad9a         | 1.664435914 | 1.03716411 | 1.82930108 | 1.139897  |
| A_51_P2321 | 9596    | Detected   | 14323.6 | Detected   | 11994.8 | Detected   | 15971.6 | Detected   | Thumpd3       | 1.664401834 | 1.24997916 | 1.11505487 | 0.8374152 |
| A_51_P2230 | 602.6   | Detected   | 939.5   | Detected   | 930.3   | Detected   | 1002.8  | Detected   | Fbxo30        | 1.664122137 | 1.54381016 | 1.06737626 | 0.9902076 |
| A_51_P4871 | 125     | Detected   | 129.3   | Detected   | 129.9   | Detected   | 208     | Detected   | Megf11        | 1.664       | 1.0392     | 1.60866203 | 1.0046404 |
| A_52_P1397 | 2474.5  | Detected   | 3406.7  | Detected   | 3612.9  | Detected   | 4117.3  | Detected   | Mdp1          | 1.663891695 | 1.46005254 | 1.20858896 | 1.0605278 |
| A_52_P5805 | 97.4    | Detected   | 114     | Detected   | 71.8    | Detected   | 162     | Detected   | Spata33       | 1.663244353 | 0.73716632 | 1.42105263 | 0.6298246 |
| A_51_P4335 | 243.9   | Detected   | 299.8   | Detected   | 340.4   | Detected   | 405.6   | Detected   | Bcas3         | 1.66297663  | 1.39565396 | 1.35290193 | 1.1354236 |
| A_55_P2208 | 100.5   | Detected   | 81.5    | Detected   | 61.4    | Detected   | 167.1   | Detected   | B230334C09Rik | 1.662686567 | 0.61094527 | 2.05030675 | 0.7533742 |
| A_55_P2056 | 138.4   | Detected   | 167.9   | Detected   | 175     | Detected   | 230.1   | Detected   | Pdlim5        | 1.662572254 | 1.26445087 | 1.37045861 | 1.0422871 |

|            |                  |                  |                  |                  |               |             |            |            |           |
|------------|------------------|------------------|------------------|------------------|---------------|-------------|------------|------------|-----------|
| A_55_P1985 | 180.7 Detected   | 192.5 Detected   | 252.1 Detected   | 300.4 Detected   | Xylt1         | 1.662423907 | 1.39513005 | 1.56051948 | 1.3096104 |
| A_55_P2113 | 15.4 Detected    | 11.1 Not Detect  | 3.2 Not Detect   | 25.6 Not Detect  | Raph1         | 1.662337662 | 0.20779221 | 2.30630631 | 0.2882883 |
| A_55_P2072 | 106.6 Detected   | 98.4 Detected    | 107.8 Detected   | 177.2 Detected   | Pcdhb12       | 1.662288931 | 1.01125704 | 1.80081301 | 1.0955285 |
| A_55_P2185 | 188 Detected     | 237.2 Detected   | 514.7 Detected   | 312.5 Detected   | Nrg4          | 1.662234043 | 2.73776596 | 1.31745363 | 2.1698988 |
| A_55_P1975 | 32970.2 Detected | 56885.8 Detected | 36744.4 Detected | 54789.8 Detected | Nutf2         | 1.661797623 | 1.11447307 | 0.96315425 | 0.6459327 |
| A_55_P2174 | 3292 Detected    | 3753.9 Detected  | 3689.4 Detected  | 5470.4 Detected  | Rab8a         | 1.661725395 | 1.12071689 | 1.45725779 | 0.9828179 |
| A_55_P1959 | 1896.8 Detected  | 2121.9 Detected  | 3134.7 Detected  | 3151.5 Detected  | Ccdc77        | 1.661482497 | 1.65262547 | 1.48522551 | 1.4773081 |
| A_51_P3439 | 365.6 Detected   | 404.2 Detected   | 422.7 Detected   | 607.4 Detected   | Parp4         | 1.661378556 | 1.15618162 | 1.50272143 | 1.0457694 |
| A_55_P1966 | 2050.6 Detected  | 3162.5 Detected  | 1757.7 Detected  | 3406.8 Detected  | Rnaseh2a      | 1.661367405 | 0.85716376 | 1.07724901 | 0.5557945 |
| A_55_P2032 | 6.2 Not Detect   | 3.7 Not Detect   | 88.8 Detected    | 10.3 Not Detect  | Tox           | 1.661290323 | 14.3225806 | 2.78378378 | 24        |
| A_52_P5842 | 1595.4 Detected  | 2094.8 Detected  | 1903.2 Detected  | 2650.2 Detected  | Atrnl1        | 1.661150809 | 1.19292967 | 1.26513271 | 0.9085354 |
| A_52_P2532 | 28.6 Detected    | 26.3 Detected    | 33.2 Detected    | 47.5 Not Detect  | BC030307      | 1.660839161 | 1.16083916 | 1.80608365 | 1.2623574 |
| A_55_P2035 | 754.6 Detected   | 934.6 Detected   | 901.3 Detected   | 1253.2 Detected  | Mical3        | 1.660747416 | 1.19440763 | 1.3408945  | 0.9643698 |
| A_51_P3451 | 168.1 Detected   | 204.7 Detected   | 213 Detected     | 279.1 Detected   | Bbs2          | 1.660321237 | 1.26710291 | 1.36345872 | 1.0405471 |
| A_66_P1128 | 6517.1 Detected  | 6611.3 Detected  | 4716.3 Detected  | 10819 Detected   | Gm17821       | 1.660094214 | 0.72368078 | 1.63644064 | 0.7133695 |
| A_55_P2044 | 96.2 Detected    | 217.6 Detected   | 99.5 Detected    | 159.7 Detected   | Hsf4          | 1.66008316  | 1.03430353 | 0.73391544 | 0.457261  |
| A_55_P2000 | 13949.1 Detected | 19944.2 Detected | 21620.6 Detected | 23152.3 Detected | Slc50a1       | 1.659770164 | 1.5499638  | 1.16085378 | 1.0840545 |
| A_55_P2135 | 409.1 Detected   | 425.2 Detected   | 371.4 Detected   | 679 Detected     | BC024978      | 1.659740895 | 0.90784649 | 1.59689558 | 0.8734713 |
| A_55_P2019 | 18.5 Detected    | 10.3 Not Detect  | 7.9 Not Detect   | 30.7 Not Detect  | 1700061G19Rik | 1.659459459 | 0.42702703 | 2.98058252 | 0.7669903 |
| A_55_P2177 | 17132.4 Detected | 22651 Detected   | 26746.1 Detected | 28425 Detected   | Hist1h2bm     | 1.659137074 | 1.56114146 | 1.25491148 | 1.1807911 |
| A_55_P2016 | 301.8 Detected   | 321.6 Detected   | 299.4 Detected   | 500.7 Detected   | Srcrb4d       | 1.659045726 | 0.99204771 | 1.55690299 | 0.9309701 |
| A_51_P3279 | 1930.5 Detected  | 2384.9 Detected  | 2378.4 Detected  | 3202.3 Detected  | Yipf1         | 1.658793059 | 1.23201243 | 1.34273974 | 0.9972745 |
| A_55_P2032 | 27513.3 Detected | 18927 Detected   | 35395.7 Detected | 45636.2 Detected | Hmgcs1        | 1.658695976 | 1.28649417 | 2.41116923 | 1.8701168 |
| A_55_P2210 | 48171 Detected   | 60364.1 Detected | 46300.6 Detected | 79900.8 Detected | A830073O21Rik | 1.658690914 | 0.96117166 | 1.32364766 | 0.7670221 |
| A_55_P2010 | 759.2 Detected   | 1031.6 Detected  | 463.9 Detected   | 1259.2 Detected  | Sec16b        | 1.658587987 | 0.61103793 | 1.22062815 | 0.4496898 |
| A_51_P4800 | 84.3 Detected    | 84.4 Detected    | 83.2 Detected    | 139.8 Detected   | Chad          | 1.658362989 | 0.98695136 | 1.6563981  | 0.985782  |
| A_55_P2316 | 58.5 Detected    | 60.7 Detected    | 70.4 Detected    | 97 Detected      | 9430063H18Rik | 1.658119658 | 1.2034188  | 1.59802306 | 1.1598023 |
| A_55_P1982 | 68.4 Detected    | 103.6 Detected   | 75.7 Detected    | 113.4 Detected   | Clca6         | 1.657894737 | 1.10672515 | 1.09459459 | 0.730695  |
| A_52_P5519 | 1238.7 Detected  | 1404.3 Detected  | 1930.1 Detected  | 2053.3 Detected  | Slc33a1       | 1.657624929 | 1.55816582 | 1.46215196 | 1.3744214 |
| A_51_P4563 | 1129.6 Detected  | 1456.6 Detected  | 1281.2 Detected  | 1872.2 Detected  | Pard6a        | 1.65740085  | 1.1342068  | 1.28532198 | 0.8795826 |
| A_51_P3657 | 88 Detected      | 102.9 Detected   | 126.7 Detected   | 145.8 Detected   | Slc35g3       | 1.656818182 | 1.43977273 | 1.41690962 | 1.2312925 |
| A_55_P1975 | 2813.6 Detected  | 2228.1 Detected  | 2998.1 Detected  | 4661.5 Detected  | Srd5a3        | 1.656774239 | 1.06557435 | 2.09214129 | 1.3455859 |
| A_51_P1166 | 2212.4 Detected  | 2423.3 Detected  | 1583.6 Detected  | 3665 Detected    | LOC101056094  | 1.656572048 | 0.71578376 | 1.51240045 | 0.653489  |
| A_51_P1555 | 1322.8 Detected  | 1201.4 Detected  | 1876 Detected    | 2191.2 Detected  | Alg3          | 1.656486241 | 1.41820381 | 1.82387215 | 1.5615116 |
| A_51_P4623 | 31.7 Detected    | 27.9 Detected    | 34.3 Detected    | 52.5 Detected    | G6pc          | 1.65615142  | 1.08201893 | 1.88172043 | 1.2293907 |
| A_55_P2031 | 11632.7 Detected | 17909.5 Detected | 13223.2 Detected | 19264.8 Detected | Dhps          | 1.65609016  | 1.13672664 | 1.07567492 | 0.7383344 |
| A_52_P3239 | 24.4 Detected    | 28.6 Detected    | 22.7 Detected    | 40.4 Not Detect  | Grk4          | 1.655737705 | 0.93032787 | 1.41258741 | 0.7937063 |
| A_55_P2329 | 27.3 Detected    | 30.3 Detected    | 32.5 Detected    | 45.2 Not Detect  | Catsperd      | 1.655677656 | 1.19047619 | 1.49174917 | 1.0726073 |
| A_55_P2195 | 47.3 Detected    | 48.4 Detected    | 61.3 Detected    | 78.3 Detected    | 1700066D14Rik | 1.655391121 | 1.29598309 | 1.6177686  | 1.2665289 |
| A_55_P1963 | 460.1 Detected   | 463.4 Detected   | 746.3 Detected   | 761.6 Detected   | Klhdc7b       | 1.655292328 | 1.62203869 | 1.64350453 | 1.6104877 |

|            |         |            |         |            |         |            |         |            |               |             |            |            |           |
|------------|---------|------------|---------|------------|---------|------------|---------|------------|---------------|-------------|------------|------------|-----------|
| A_51_P4707 | 1154.3  | Detected   | 473.9   | Detected   | 922.9   | Detected   | 1910.7  | Detected   | Cish          | 1.65528892  | 0.79953218 | 4.03186326 | 1.9474573 |
| A_51_P3321 | 1895.1  | Detected   | 2638.6  | Detected   | 2669.5  | Detected   | 3136.3  | Detected   | Zmat5         | 1.654952245 | 1.40863279 | 1.18862275 | 1.0117108 |
| A_55_P1986 | 1260.6  | Detected   | 1935.6  | Detected   | 1605.7  | Detected   | 2086.2  | Detected   | Gcdh          | 1.654926226 | 1.27375853 | 1.07780533 | 0.8295619 |
| A_55_P2228 | 28.1    | Detected   | 39.7    | Detected   | 26.2    | Detected   | 46.5    | Not Detect | 5730422E09Rik | 1.65480427  | 0.93238434 | 1.17128463 | 0.6599496 |
| A_51_P4996 | 13.9    | Detected   | 10.4    | Not Detect | 13.6    | Not Detect | 23      | Not Detect | Asprv1        | 1.654676259 | 0.97841727 | 2.21153846 | 1.3076923 |
| A_55_P2107 | 198.8   | Detected   | 212     | Detected   | 167.3   | Detected   | 328.9   | Detected   | Slc22a13b-ps  | 1.654426559 | 0.8415493  | 1.55141509 | 0.7891509 |
| A_55_P2143 | 3341.9  | Detected   | 9032.4  | Detected   | 3762.9  | Detected   | 5527.9  | Detected   | Fstl3         | 1.654118914 | 1.12597624 | 0.61200788 | 0.4166002 |
| A_55_P2193 | 49.1    | Detected   | 61.7    | Detected   | 83.1    | Detected   | 81.2    | Detected   | 9530062K07Rik | 1.653767821 | 1.69246436 | 1.31604538 | 1.3468395 |
| A_66_P1189 | 51.4    | Detected   | 54.1    | Detected   | 72.6    | Detected   | 85      | Detected   | Adora2b       | 1.653696498 | 1.41245136 | 1.57116451 | 1.3419593 |
| A_51_P1353 | 388.3   | Detected   | 458.7   | Detected   | 329     | Detected   | 642.1   | Detected   | Sike1         | 1.653618336 | 0.84728303 | 1.39982559 | 0.7172444 |
| A_55_P2005 | 3310    | Detected   | 3437.7  | Detected   | 3266.8  | Detected   | 5473.1  | Detected   | Lhx6          | 1.653504532 | 0.98694864 | 1.59208192 | 0.9502865 |
| A_55_P2069 | 20.2    | Detected   | 13.6    | Not Detect | 24.1    | Detected   | 33.4    | Not Detect | 9930013L23Rik | 1.653465347 | 1.19306931 | 2.45588235 | 1.7720588 |
| A_55_P2063 | 756     | Detected   | 1287.6  | Detected   | 1203.4  | Detected   | 1250    | Detected   | Dph3          | 1.653439153 | 1.59179894 | 0.97079838 | 0.934607  |
| A_55_P2152 | 369.2   | Detected   | 477.4   | Detected   | 444.9   | Detected   | 610.4   | Detected   | Plekha5       | 1.653304442 | 1.20503792 | 1.27859238 | 0.9319229 |
| A_55_P2325 | 33.4    | Detected   | 51.3    | Detected   | 49.1    | Detected   | 55.2    | Detected   | BB085087      | 1.652694611 | 1.47005988 | 1.07602339 | 0.957115  |
| A_55_P2401 | 1756.8  | Detected   | 2720.9  | Detected   | 2112.6  | Detected   | 2903.3  | Detected   | C030046G05    | 1.652607013 | 1.20252732 | 1.06703664 | 0.7764343 |
| A_51_P1644 | 11106.8 | Detected   | 16052.3 | Detected   | 10284.7 | Detected   | 18354.9 | Detected   | Dda1          | 1.652582202 | 0.92598228 | 1.14344362 | 0.6406995 |
| A_55_P2403 | 60.7    | Detected   | 62.6    | Detected   | 67.4    | Detected   | 100.3   | Detected   | D230014I24Rik | 1.652388797 | 1.11037891 | 1.60223642 | 1.0766773 |
| A_55_P2361 | 77      | Detected   | 58.4    | Detected   | 139.1   | Detected   | 127.2   | Detected   | 4831440E17Rik | 1.651948052 | 1.80649351 | 2.17808219 | 2.3818493 |
| A_55_P2052 | 56.6    | Detected   | 64.9    | Detected   | 49.9    | Detected   | 93.5    | Detected   | Hyal6         | 1.651943463 | 0.88162544 | 1.44067797 | 0.7688752 |
| A_55_P2114 | 329.8   | Detected   | 376.3   | Detected   | 467.8   | Detected   | 544.8   | Detected   | Hyls1         | 1.651910249 | 1.41843542 | 1.44778103 | 1.2431571 |
| A_55_P2017 | 161.6   | Detected   | 149.5   | Detected   | 68.4    | Detected   | 266.9   | Detected   | 3110007F17Rik | 1.651608911 | 0.42326733 | 1.78528428 | 0.4575251 |
| A_55_P2171 | 30611.1 | Detected   | 22592.4 | Detected   | 43880   | Detected   | 50556   | Detected   | Me1           | 1.651557768 | 1.43346694 | 2.23774367 | 1.9422461 |
| A_55_P1989 | 530.2   | Detected   | 729.6   | Detected   | 267.7   | Detected   | 875.6   | Detected   | Cklf          | 1.651452282 | 0.50490381 | 1.20010965 | 0.3669134 |
| A_52_P1823 | 86.6    | Detected   | 127     | Detected   | 133.6   | Detected   | 143     | Detected   | 4930556M19Rik | 1.651270208 | 1.54272517 | 1.12598425 | 1.0519685 |
| A_52_P4471 | 200.7   | Detected   | 249.3   | Detected   | 223.8   | Detected   | 331.4   | Detected   | Col4a6        | 1.651220727 | 1.11509716 | 1.3293221  | 0.8977136 |
| A_55_P2320 | 3219    | Detected   | 3312.1  | Detected   | 3230.4  | Detected   | 5314.4  | Detected   | C030007I01Rik | 1.650947499 | 1.00354147 | 1.60454093 | 0.9753329 |
| A_55_P2037 | 12949.1 | Detected   | 13895.8 | Detected   | 16755.7 | Detected   | 21378.1 | Detected   | Klhdc10       | 1.650933269 | 1.29396638 | 1.53845766 | 1.2058104 |
| A_51_P2483 | 1845.4  | Detected   | 2082.3  | Detected   | 2176.6  | Detected   | 3046.4  | Detected   | Zdhhc4        | 1.650807413 | 1.17947328 | 1.46299765 | 1.0452865 |
| A_55_P2352 | 12.3    | Not Detect | 16.2    | Detected   | 15.1    | Not Detect | 20.3    | Not Detect | Hsp90aa1      | 1.650406504 | 1.22764228 | 1.25308642 | 0.9320988 |
| A_55_P2168 | 2138.1  | Detected   | 2433.7  | Detected   | 3186.5  | Detected   | 3527.4  | Detected   | Glod4         | 1.649782517 | 1.49034189 | 1.44939804 | 1.3093233 |
| A_55_P1975 | 45.9    | Detected   | 38.2    | Detected   | 29.4    | Detected   | 75.7    | Detected   | Gm10745       | 1.649237473 | 0.64052288 | 1.98167539 | 0.7696335 |
| A_52_P6181 | 3926.5  | Detected   | 3549.5  | Detected   | 4504.7  | Detected   | 6475.6  | Detected   | Mrs2          | 1.649204126 | 1.14725583 | 1.82436963 | 1.2691083 |
| A_55_P2127 | 7609.1  | Detected   | 9035.1  | Detected   | 9219    | Detected   | 12548.9 | Detected   | Abrac1        | 1.649196357 | 1.21157561 | 1.38890549 | 1.020354  |
| A_55_P2166 | 44.7    | Detected   | 46.4    | Detected   | 35      | Detected   | 73.7    | Detected   | Vmn1r63       | 1.648769575 | 0.78299776 | 1.58836207 | 0.7543103 |
| A_52_P3574 | 39      | Detected   | 35.8    | Detected   | 54.8    | Detected   | 64.3    | Detected   | Fgd4          | 1.648717949 | 1.40512821 | 1.79608939 | 1.5307263 |
| A_52_P5099 | 622.8   | Detected   | 696     | Detected   | 592.6   | Detected   | 1026.8  | Detected   | Ift172        | 1.648683365 | 0.95150931 | 1.47528736 | 0.8514368 |
| A_51_P4330 | 16050   | Detected   | 17026   | Detected   | 16002.9 | Detected   | 26460.7 | Detected   | Purb          | 1.648641745 | 0.99706542 | 1.55413485 | 0.9399096 |
| A_55_P2141 | 519.9   | Detected   | 532.4   | Detected   | 694.8   | Detected   | 857.1   | Detected   | 1810058I24Rik | 1.648586267 | 1.33641085 | 1.60987979 | 1.3050338 |
| A_55_P2146 | 9113.2  | Detected   | 11412.3 | Detected   | 10566.2 | Detected   | 15020.7 | Detected   | Cox20         | 1.648235526 | 1.15943906 | 1.31618517 | 0.9258607 |



|            |         |            |         |            |         |            |         |            |               |             |            |            |           |
|------------|---------|------------|---------|------------|---------|------------|---------|------------|---------------|-------------|------------|------------|-----------|
| A_51_P1897 | 679.1   | Detected   | 552.3   | Detected   | 908     | Detected   | 1119.3  | Detected   | 2810007J24Rik | 1.648210867 | 1.33706376 | 2.02661597 | 1.644034  |
| A_55_P1976 | 23.3    | Detected   | 42.1    | Detected   | 32      | Detected   | 38.4    | Not Detect | Gm3871        | 1.64806867  | 1.37339056 | 0.91211401 | 0.760095  |
| A_52_P5445 | 16747.4 | Detected   | 24956.5 | Detected   | 18890.7 | Detected   | 27594   | Detected   | Hsbp1         | 1.647658741 | 1.12797807 | 1.10568389 | 0.7569451 |
| A_52_P1519 | 7023.3  | Detected   | 8775.2  | Detected   | 6696.4  | Detected   | 11564.2 | Detected   | Dcun1d2       | 1.646547919 | 0.95345493 | 1.31782751 | 0.7631051 |
| A_55_P2083 | 2505.2  | Detected   | 2190.4  | Detected   | 2540.5  | Detected   | 4124.8  | Detected   | Catsperd      | 1.64649529  | 1.01409069 | 1.88312637 | 1.1598338 |
| A_55_P1985 | 192.3   | Detected   | 302.5   | Detected   | 168.9   | Detected   | 316.6   | Detected   | Pard3         | 1.646385855 | 0.87831513 | 1.04661157 | 0.5583471 |
| A_55_P1981 | 16.4    | Detected   | 14.9    | Not Detect | 19.1    | Detected   | 27      | Not Detect | Tnfrsf13b     | 1.646341463 | 1.16463415 | 1.81208054 | 1.2818792 |
| A_55_P2013 | 14.7    | Detected   | 16.9    | Detected   | 16.8    | Detected   | 24.2    | Not Detect | Sult5a1       | 1.646258503 | 1.14285714 | 1.43195266 | 0.9940828 |
| A_52_P2664 | 327.6   | Detected   | 454.1   | Detected   | 284.4   | Detected   | 539.3   | Detected   | Ing2          | 1.646214896 | 0.86813187 | 1.18762387 | 0.6262938 |
| A_51_P4346 | 4146.6  | Detected   | 7518.2  | Detected   | 5391.4  | Detected   | 6826    | Detected   | Ube2e2        | 1.646167945 | 1.30019775 | 0.90793009 | 0.7171131 |
| A_55_P2060 | 269.3   | Detected   | 301.4   | Detected   | 226.9   | Detected   | 443.3   | Detected   | Whsc1l1       | 1.646119569 | 0.84255477 | 1.47080292 | 0.7528202 |
| A_52_P4805 | 2187    | Detected   | 2791.7  | Detected   | 1983.6  | Detected   | 3600    | Detected   | Tnpo2         | 1.646090535 | 0.90699588 | 1.28953684 | 0.7105348 |
| A_51_P3368 | 116.4   | Detected   | 12425.8 | Detected   | 22.3    | Detected   | 191.6   | Detected   | Fabp4         | 1.64604811  | 0.19158076 | 0.01541953 | 0.0017947 |
| A_55_P2111 | 19.2    | Detected   | 24.8    | Detected   | 288.8   | Detected   | 31.6    | Not Detect | Ttyh1         | 1.645833333 | 15.0416667 | 1.27419355 | 11.645161 |
| A_55_P2184 | 14.4    | Detected   | 9.3     | Not Detect | 20      | Detected   | 23.7    | Not Detect | Etohd2        | 1.645833333 | 1.38888889 | 2.5483871  | 2.1505376 |
| A_55_P2079 | 1760.8  | Detected   | 2915.2  | Detected   | 2107.8  | Detected   | 2897.8  | Detected   | Pan2          | 1.645729214 | 1.19706951 | 0.99403128 | 0.7230379 |
| A_55_P2073 | 535.7   | Detected   | 454.3   | Detected   | 890.6   | Detected   | 881.6   | Detected   | Tfdp2         | 1.645697219 | 1.66249767 | 1.94056791 | 1.9603786 |
| A_55_P2073 | 3184.5  | Detected   | 2931.3  | Detected   | 4138.6  | Detected   | 5240.1  | Detected   | Lin37         | 1.645501649 | 1.29960747 | 1.78763688 | 1.411865  |
| A_51_P1179 | 12229.1 | Detected   | 11087.9 | Detected   | 21059.1 | Detected   | 20122.5 | Detected   | Pfkm          | 1.645460418 | 1.72204823 | 1.81481615 | 1.8992866 |
| A_55_P2227 | 12.4    | Not Detect | 20.1    | Detected   | 18.1    | Not Detect | 20.4    | Not Detect | Ptpro         | 1.64516129  | 1.45967742 | 1.01492537 | 0.9004975 |
| A_55_P1966 | 506     | Detected   | 572.6   | Detected   | 520.7   | Detected   | 832.3   | Detected   | Iqcc          | 1.64486166  | 1.02905138 | 1.45354523 | 0.9093608 |
| A_55_P1982 | 49636.7 | Detected   | 44020.6 | Detected   | 67339.9 | Detected   | 81641.6 | Detected   | Cib1          | 1.644782993 | 1.35665546 | 1.85462261 | 1.5297361 |
| A_51_P4477 | 30.1    | Detected   | 14.6    | Not Detect | 70.2    | Detected   | 49.5    | Not Detect | Cyp2c55       | 1.644518272 | 2.33222591 | 3.39041096 | 4.8082192 |
| A_55_P2095 | 54      | Detected   | 38.9    | Detected   | 42.1    | Detected   | 88.8    | Detected   | Gnrh1         | 1.644444444 | 0.77962963 | 2.28277635 | 1.0822622 |
| A_55_P2056 | 1102.1  | Detected   | 1736.1  | Detected   | 1276.6  | Detected   | 1812.2  | Detected   | Rpl21         | 1.644315398 | 1.15833409 | 1.04383388 | 0.7353263 |
| A_51_P3587 | 389.2   | Detected   | 372.3   | Detected   | 126.3   | Detected   | 639.9   | Detected   | Lancl3        | 1.644141829 | 0.32451182 | 1.71877518 | 0.3392425 |
| A_66_P1124 | 28.1    | Detected   | 27      | Detected   | 27.9    | Detected   | 46.2    | Not Detect | Scn4b         | 1.644128114 | 0.99288256 | 1.71111111 | 1.0333333 |
| A_51_P2426 | 392.5   | Detected   | 505.2   | Detected   | 532.8   | Detected   | 645.3   | Detected   | E430018J23Rik | 1.644076433 | 1.35745223 | 1.27731591 | 1.0546318 |
| A_51_P1723 | 712.5   | Detected   | 728.8   | Detected   | 647.5   | Detected   | 1171.3  | Detected   | Foxn3         | 1.643929825 | 0.90877193 | 1.60716246 | 0.8884468 |
| A_51_P3137 | 13855.9 | Detected   | 18781.2 | Detected   | 19941.4 | Detected   | 22774.3 | Detected   | Shmt2         | 1.643653606 | 1.43919919 | 1.21261155 | 1.0617745 |
| A_55_P2014 | 2610.2  | Detected   | 4271.3  | Detected   | 3450.8  | Detected   | 4290    | Detected   | Zfp961        | 1.643552218 | 1.32204429 | 1.00437806 | 0.8079039 |
| A_52_P4521 | 541.1   | Detected   | 573.5   | Detected   | 792.7   | Detected   | 889.3   | Detected   | Grpel2        | 1.643503973 | 1.46497875 | 1.55065388 | 1.3822145 |
| A_55_P2170 | 197.3   | Detected   | 165.1   | Detected   | 157     | Detected   | 324.2   | Detected   | Yipf6         | 1.64318297  | 0.79574252 | 1.96365839 | 0.9509388 |
| A_51_P2584 | 794     | Detected   | 3296.9  | Detected   | 892.7   | Detected   | 1304.6  | Detected   | Hey1          | 1.643073048 | 1.1243073  | 0.39570506 | 0.2707695 |
| A_51_P1739 | 1424.2  | Detected   | 1659    | Detected   | 1737.3  | Detected   | 2340    | Detected   | Mto1          | 1.643027665 | 1.21984272 | 1.41048825 | 1.0471971 |
| A_55_P2048 | 696.3   | Detected   | 906.3   | Detected   | 963.8   | Detected   | 1143.9  | Detected   | Aasdhppt      | 1.642826368 | 1.38417349 | 1.26216485 | 1.0634448 |
| A_65_P0217 | 45.9    | Detected   | 58.7    | Detected   | 66.3    | Detected   | 75.4    | Detected   | C2cd5         | 1.642701525 | 1.44444444 | 1.28449744 | 1.1294719 |
| A_51_P1998 | 2730.1  | Detected   | 3495.9  | Detected   | 2625.3  | Detected   | 4484.3  | Detected   | Fto           | 1.642540566 | 0.96161313 | 1.2827312  | 0.7509654 |
| A_55_P1994 | 17.9    | Detected   | 16.1    | Not Detect | 26      | Detected   | 29.4    | Not Detect | Ccdc154       | 1.642458101 | 1.45251397 | 1.82608696 | 1.6149068 |
| A_55_P2189 | 31.6    | Detected   | 43.6    | Detected   | 34.2    | Detected   | 51.9    | Detected   | 4933417C20Rik | 1.642405063 | 1.08227848 | 1.19036697 | 0.7844037 |

|            |                  |                  |                  |                  |               |             |            |            |           |
|------------|------------------|------------------|------------------|------------------|---------------|-------------|------------|------------|-----------|
| A_66_P1174 | 17.3 Detected    | 35.5 Detected    | 36.2 Detected    | 28.4 Not Detect  | Gm14317       | 1.641618497 | 2.09248555 | 0.8        | 1.0197183 |
| A_55_P2083 | 448.8 Detected   | 246.5 Detected   | 787 Detected     | 736.7 Detected   | Hs3st1        | 1.641488414 | 1.75356506 | 2.98864097 | 3.1926978 |
| A_55_P2052 | 1629.9 Detected  | 1980.5 Detected  | 1922.6 Detected  | 2675.4 Detected  | Sox21         | 1.641450396 | 1.17958157 | 1.35087099 | 0.970765  |
| A_51_P3921 | 5439.2 Detected  | 7020.2 Detected  | 6804.4 Detected  | 8928 Detected    | Xab2          | 1.641417856 | 1.25099279 | 1.27175864 | 0.9692601 |
| A_55_P1967 | 1205.3 Detected  | 698.1 Detected   | 2989.6 Detected  | 1978.4 Detected  | Tmem151a      | 1.641417075 | 2.48037833 | 2.83397794 | 4.282481  |
| A_55_P1984 | 2044.7 Detected  | 1671.1 Detected  | 2700 Detected    | 3356.2 Detected  | Kmt2c         | 1.641414388 | 1.32048711 | 2.00837772 | 1.6157022 |
| A_55_P2034 | 12120.4 Detected | 9532.4 Detected  | 11812.4 Detected | 19892.9 Detected | Tjp1          | 1.641274215 | 0.9745883  | 2.08687214 | 1.2391843 |
| A_52_P3710 | 137.7 Detected   | 160.4 Detected   | 133.9 Detected   | 226 Detected     | Iqcc          | 1.641249092 | 0.97240378 | 1.40897756 | 0.834788  |
| A_55_P2086 | 23627.5 Detected | 21351.8 Detected | 35132.9 Detected | 38777.8 Detected | Oasl1         | 1.641214686 | 1.48694953 | 1.81613728 | 1.6454304 |
| A_55_P1955 | 28.7 Detected    | 88.5 Detected    | 20.9 Detected    | 47.1 Not Detect  | Myo1b         | 1.641114983 | 0.728223   | 0.53220339 | 0.2361582 |
| A_55_P2150 | 503 Detected     | 326.9 Detected   | 407.3 Detected   | 825.4 Detected   | Eomes         | 1.640954274 | 0.80974155 | 2.52493117 | 1.2459468 |
| A_55_P2038 | 8034.1 Detected  | 8143.6 Detected  | 11177.2 Detected | 13180.5 Detected | Rexo2         | 1.640569572 | 1.39121993 | 1.61851024 | 1.3725134 |
| A_51_P1385 | 5864.4 Detected  | 6768.3 Detected  | 5364.2 Detected  | 9620.8 Detected  | Eif1b         | 1.640542937 | 0.91470568 | 1.42144999 | 0.7925476 |
| A_51_P4695 | 950.9 Detected   | 1423.2 Detected  | 970 Detected     | 1559.5 Detected  | Asna1         | 1.640025239 | 1.02008623 | 1.0957701  | 0.6815627 |
| A_51_P2985 | 32107 Detected   | 49644.8 Detected | 31866.1 Detected | 52653.7 Detected | Prmt7         | 1.63994456  | 0.99249696 | 1.06060856 | 0.6418819 |
| A_52_P2397 | 1683.4 Detected  | 2300 Detected    | 2330.3 Detected  | 2760.6 Detected  | Ccdc25        | 1.63989545  | 1.38428181 | 1.20026087 | 1.0131739 |
| A_51_P2121 | 4061.6 Detected  | 4645.8 Detected  | 5169.8 Detected  | 6658.4 Detected  | Tmem261       | 1.639353949 | 1.27284814 | 1.43320849 | 1.11279   |
| A_65_P2016 | 728.1 Detected   | 835.7 Detected   | 852.8 Detected   | 1193.6 Detected  | Hyou1         | 1.639335256 | 1.17126768 | 1.42826373 | 1.0204619 |
| A_55_P2124 | 46.3 Detected    | 39.7 Detected    | 121.9 Detected   | 75.9 Detected    | Gxylt2        | 1.639308855 | 2.63282937 | 1.91183879 | 3.070529  |
| A_65_P0060 | 611.9 Detected   | 619.9 Detected   | 781.9 Detected   | 1003 Detected    | Stat6         | 1.639156725 | 1.27782317 | 1.6180029  | 1.2613325 |
| A_55_P2031 | 79.8 Detected    | 69.1 Detected    | 55.8 Detected    | 130.8 Detected   | Sun1          | 1.639097744 | 0.69924812 | 1.89290883 | 0.8075253 |
| A_51_P4891 | 5361.9 Detected  | 4258.3 Detected  | 12568.8 Detected | 8788.5 Detected  | Crot          | 1.639064511 | 2.34409444 | 2.06385177 | 2.9516004 |
| A_51_P1246 | 119.4 Detected   | 152.6 Detected   | 133.5 Detected   | 195.7 Detected   | Anapc15       | 1.639028476 | 1.11809045 | 1.28243775 | 0.8748362 |
| A_51_P1286 | 3387.8 Detected  | 3534.4 Detected  | 2327.8 Detected  | 5552.4 Detected  | Lynx1         | 1.638939725 | 0.68711258 | 1.57095971 | 0.6586125 |
| A_66_P1022 | 21.6 Detected    | 16.9 Not Detect  | 8.9 Not Detect   | 35.4 Not Detect  | Gm648         | 1.638888889 | 0.41203704 | 2.09467456 | 0.5266272 |
| A_55_P2040 | 26.3 Detected    | 36.4 Detected    | 48.4 Detected    | 43.1 Not Detect  | Lrba          | 1.63878327  | 1.84030418 | 1.18406593 | 1.3296703 |
| A_51_P2703 | 2719.1 Detected  | 4343.7 Detected  | 2733 Detected    | 4455.8 Detected  | Mmaa          | 1.638703983 | 1.00511199 | 1.02580749 | 0.6291871 |
| A_51_P2957 | 11694.9 Detected | 13344.6 Detected | 9212.2 Detected  | 19163.8 Detected | Ints1         | 1.638645905 | 0.78771088 | 1.43607152 | 0.6903317 |
| A_51_P2888 | 4402.9 Detected  | 6336.2 Detected  | 6591.6 Detected  | 7213.9 Detected  | Slc52a2       | 1.638442844 | 1.49710418 | 1.13852151 | 1.0403081 |
| A_55_P2175 | 92.1 Detected    | 87.7 Detected    | 6.2 Not Detect   | 150.9 Detected   | Zfp467        | 1.638436482 | 0.06731813 | 1.72063854 | 0.0706956 |
| A_55_P1972 | 14.1 Not Detect  | 14 Not Detect    | 21.1 Detected    | 23.1 Not Detect  | Unkl          | 1.638297872 | 1.4964539  | 1.65       | 1.5071429 |
| A_55_P2408 | 416.1 Detected   | 392.6 Detected   | 324.4 Detected   | 681.6 Detected   | Rbm33         | 1.638067772 | 0.77962028 | 1.73611819 | 0.8262863 |
| A_51_P1530 | 1103.3 Detected  | 1870 Detected    | 951.3 Detected   | 1807.2 Detected  | Map2k3os      | 1.637995106 | 0.86223149 | 0.96641711 | 0.5087166 |
| A_55_P2096 | 1770.1 Detected  | 1338.9 Detected  | 3372.3 Detected  | 2898.8 Detected  | Ccbl1         | 1.637647591 | 1.9051466  | 2.16506087 | 2.5187094 |
| A_52_P2015 | 943 Detected     | 986.2 Detected   | 891.4 Detected   | 1544.3 Detected  | Nav1          | 1.637645811 | 0.94528102 | 1.56590955 | 0.9038735 |
| A_55_P2025 | 29018.2 Detected | 29946.3 Detected | 32689.1 Detected | 47521.3 Detected | Adam9         | 1.637637758 | 1.12650337 | 1.58688386 | 1.0915906 |
| A_55_P2008 | 217.4 Detected   | 377.4 Detected   | 233.6 Detected   | 356 Detected     | Tcp10c        | 1.637534499 | 1.07451702 | 0.94329624 | 0.6189719 |
| A_55_P1992 | 1117.5 Detected  | 2736.5 Detected  | 1384.9 Detected  | 1829.9 Detected  | Socs2         | 1.637494407 | 1.23928412 | 0.6687009  | 0.5060844 |
| A_55_P2135 | 3729.4 Detected  | 4261.1 Detected  | 6223 Detected    | 6106.6 Detected  | Fanci1        | 1.637421569 | 1.66863302 | 1.43310413 | 1.460421  |
| A_55_P2216 | 86.3 Detected    | 81.5 Detected    | 75.8 Detected    | 141.3 Detected   | 9630055L06Rik | 1.637311703 | 0.8783314  | 1.73374233 | 0.9300613 |

|            |         |            |         |            |          |            |          |            |               |             |            |            |           |
|------------|---------|------------|---------|------------|----------|------------|----------|------------|---------------|-------------|------------|------------|-----------|
| A_66_P1159 | 3738.8  | Detected   | 2979.2  | Detected   | 7180.9   | Detected   | 6121.3   | Detected   | Ccbl1         | 1.637236546 | 1.92064299 | 2.05467911 | 2.4103451 |
| A_51_P4313 | 53.2    | Detected   | 55.7    | Detected   | 45.5     | Detected   | 87.1     | Detected   | Nup214        | 1.637218045 | 0.85526316 | 1.56373429 | 0.8168761 |
| A_55_P2102 | 490.5   | Detected   | 526.1   | Detected   | 405.1    | Detected   | 802.8    | Detected   | Daam1         | 1.636697248 | 0.82589195 | 1.52594564 | 0.7700057 |
| A_55_P1997 | 44      | Detected   | 493     | Detected   | 8.2      | Not Detect | 72       | Detected   | Nat8l         | 1.636363636 | 0.18636364 | 0.14604462 | 0.0166329 |
| A_51_P2752 | 9.9     | Not Detect | 20.4    | Detected   | 12.7     | Not Detect | 16.2     | Not Detect | 4933421107Rik | 1.636363636 | 1.28282828 | 0.79411765 | 0.622549  |
| A_55_P2086 | 1210.1  | Detected   | 1975.7  | Detected   | 1886.6   | Detected   | 1980.1   | Detected   | 1700030K09Rik | 1.636311049 | 1.55904471 | 1.00222706 | 0.9549021 |
| A_55_P2029 | 41.5    | Detected   | 9.9     | Not Detect | 102.9    | Detected   | 67.9     | Detected   | C730027H18Rik | 1.636144578 | 2.47951807 | 6.85858586 | 10.393939 |
| A_55_P2184 | 3068.9  | Detected   | 2934.4  | Detected   | 3657.4   | Detected   | 5020.7   | Detected   | Tmc6          | 1.635993353 | 1.19176252 | 1.7109801  | 1.2463877 |
| A_55_P2279 | 1735.6  | Detected   | 1823.8  | Detected   | 1535.4   | Detected   | 2838.8   | Detected   | 9030419F21Rik | 1.63563033  | 0.88465084 | 1.55653032 | 0.8418686 |
| A_51_P1649 | 1594.9  | Detected   | 1650.9  | Detected   | 1864.4   | Detected   | 2608.5   | Detected   | Tmem150a      | 1.635525738 | 1.16897611 | 1.58004725 | 1.1293234 |
| A_51_P2106 | 648.2   | Detected   | 789.9   | Detected   | 846.5    | Detected   | 1060.1   | Detected   | Cyp4f13       | 1.635452021 | 1.3059241  | 1.34206862 | 1.0716546 |
| A_55_P1992 | 1271.8  | Detected   | 3230.5  | Detected   | 1445.7   | Detected   | 2079.8   | Detected   | Socs2         | 1.635320019 | 1.13673534 | 0.64380127 | 0.4475159 |
| A_55_P2032 | 15092.3 | Detected   | 19681.4 | Detected   | 21462.7  | Detected   | 24678.9  | Detected   | Mrpl23        | 1.635198081 | 1.42209604 | 1.25391994 | 1.0905068 |
| A_52_P8190 | 805     | Detected   | 1003.2  | Detected   | 680.4    | Detected   | 1316.2   | Detected   | Cbl           | 1.635031056 | 0.84521739 | 1.31200159 | 0.6782297 |
| A_52_P2124 | 762.1   | Detected   | 1284.2  | Detected   | 1015     | Detected   | 1246     | Detected   | Trmt13        | 1.634956043 | 1.33184621 | 0.97025385 | 0.7903753 |
| A_55_P2048 | 5369.4  | Detected   | 6366.1  | Detected   | 4494.4   | Detected   | 8775.7   | Detected   | Cdk10         | 1.63439118  | 0.83703952 | 1.37850489 | 0.7059895 |
| A_52_P4367 | 4432.9  | Detected   | 3649.3  | Detected   | 5038.7   | Detected   | 7243.9   | Detected   | Gltp          | 1.634122132 | 1.13665997 | 1.98501082 | 1.3807306 |
| A_52_P5499 | 3998.6  | Detected   | 4636.6  | Detected   | 5601.6   | Detected   | 6534     | Detected   | Fam32a        | 1.634071925 | 1.40089031 | 1.40922227 | 1.2081266 |
| A_52_P6340 | 1204    | Detected   | 2613.4  | Detected   | 1551.9   | Detected   | 1967.2   | Detected   | Jag1          | 1.633887043 | 1.28895349 | 0.7527359  | 0.5938241 |
| A_55_P2031 | 43.7    | Detected   | 33.8    | Detected   | 43.4     | Detected   | 71.4     | Detected   | Aqp4          | 1.633867277 | 0.99313501 | 2.11242604 | 1.2840237 |
| A_55_P2057 | 342.2   | Detected   | 517.3   | Detected   | 614.5    | Detected   | 559.1    | Detected   | Slmo1         | 1.63383986  | 1.79573349 | 1.08080418 | 1.1878987 |
| A_52_P5138 | 928.4   | Detected   | 1472.8  | Detected   | 967.5    | Detected   | 1516.8   | Detected   | Fubp1         | 1.633778544 | 1.04211547 | 1.02987507 | 0.656912  |
| A_55_P2082 | 52.7    | Detected   | 49.7    | Detected   | 66.7     | Detected   | 86.1     | Detected   | Kidins220     | 1.633776091 | 1.26565465 | 1.73239437 | 1.3420523 |
| A_55_P2228 | 122.8   | Detected   | 309.3   | Detected   | 117.5    | Detected   | 200.6    | Detected   | 5730422E09Rik | 1.633550489 | 0.95684039 | 0.64856127 | 0.3798901 |
| A_51_P2020 | 9788.4  | Detected   | 11578.5 | Detected   | 14408.6  | Detected   | 15989    | Detected   | Wls           | 1.6334641   | 1.47200768 | 1.38092154 | 1.2444272 |
| A_55_P1982 | 2543.3  | Detected   | 2748.5  | Detected   | 2443.1   | Detected   | 4154.2   | Detected   | Slc8a3        | 1.633389691 | 0.96060237 | 1.51144261 | 0.8888848 |
| A_55_P2103 | 6       | Not Detect | 10.4    | Not Detect | 17.5     | Detected   | 9.8      | Not Detect | Pou3f2        | 1.633333333 | 2.91666667 | 0.94230769 | 1.6826923 |
| A_55_P1957 | 8642.1  | Detected   | 10199.9 | Detected   | 10828.5  | Detected   | 14114.4  | Detected   | Pus7          | 1.633214149 | 1.25299406 | 1.38377827 | 1.0616281 |
| A_51_P4440 | 3799.7  | Detected   | 4294.2  | Detected   | 4145     | Detected   | 6205.6   | Detected   | Scp2          | 1.633181567 | 1.0908756  | 1.44511201 | 0.9652555 |
| A_55_P1962 | 231.4   | Detected   | 350.3   | Detected   | 1157.3   | Detected   | 377.7    | Detected   | Hba-a2        | 1.632238548 | 5.00129646 | 1.07821867 | 3.3037397 |
| A_55_P2352 | 309.9   | Detected   | 316.3   | Detected   | 363.2    | Detected   | 505.8    | Detected   | Mon2          | 1.6321394   | 1.17199096 | 1.59911476 | 1.148277  |
| A_55_P2376 | 265.8   | Detected   | 258.4   | Detected   | 239.1    | Detected   | 433.8    | Detected   | 4930432F04Rik | 1.632054176 | 0.89954853 | 1.67879257 | 0.9253096 |
| A_55_P1997 | 12082.9 | Detected   | 13775.2 | Detected   | 18143.4  | Detected   | 19718.6  | Detected   | Cox16         | 1.631942663 | 1.50157661 | 1.43145653 | 1.3171061 |
| A_55_P2156 | 1382.7  | Detected   | 1907.8  | Detected   | 1615.6   | Detected   | 2256.3   | Detected   | Plekha2       | 1.631807333 | 1.16843856 | 1.18267114 | 0.8468393 |
| A_55_P2011 | 506.9   | Detected   | 762     | Detected   | 431.6    | Detected   | 827.1    | Detected   | Junb          | 1.631682778 | 0.85144999 | 1.08543307 | 0.5664042 |
| A_55_P2035 | 11.4    | Not Detect | 23      | Detected   | 19.1     | Detected   | 18.6     | Not Detect | Kif9          | 1.631578947 | 1.6754386  | 0.80869565 | 0.8304348 |
| A_55_P2105 | 5.7     | Not Detect | 39.1    | Detected   | 3.3      | Not Detect | 9.3      | Not Detect | Trpa1         | 1.631578947 | 0.57894737 | 0.23785166 | 0.084399  |
| A_52_P4971 | 1384.6  | Detected   | 1622.5  | Detected   | 1109.5   | Detected   | 2259     | Detected   | Prrg1         | 1.631518128 | 0.80131446 | 1.39229584 | 0.6838213 |
| A_52_P4248 | 4260    | Detected   | 7955.1  | Detected   | 4802.7   | Detected   | 6949.8   | Detected   | Txn14b        | 1.631408451 | 1.12739437 | 0.87362824 | 0.6037259 |
| A_55_P2096 | 73391.8 | Detected   | 84972.8 | Detected   | 100707.5 | Detected   | 119729.8 | Detected   | Myl6          | 1.631378437 | 1.37219008 | 1.40903677 | 1.1851734 |

|            |                  |                   |                  |                   |               |             |            |            |           |
|------------|------------------|-------------------|------------------|-------------------|---------------|-------------|------------|------------|-----------|
| A_55_P2156 | 61.3 Detected    | 62.3 Detected     | 126.1 Detected   | 100 Detected      | Sytl3         | 1.63132137  | 2.05709625 | 1.60513644 | 2.024077  |
| A_51_P4937 | 1705 Detected    | 1249.5 Detected   | 1624 Detected    | 2781.1 Detected   | Cep350        | 1.631143695 | 0.95249267 | 2.22577031 | 1.2997199 |
| A_52_P1210 | 10327 Detected   | 11489.1 Detected  | 15023.8 Detected | 16843.8 Detected  | 2610001J05Rik | 1.631044834 | 1.45480779 | 1.46606784 | 1.3076568 |
| A_51_P1996 | 1736.3 Detected  | 1853.5 Detected   | 1499.8 Detected  | 2831.7 Detected   | Sfswap        | 1.63088176  | 0.86379082 | 1.5277583  | 0.8091718 |
| A_52_P3836 | 517.5 Detected   | 455.4 Detected    | 1088.8 Detected  | 843.9 Detected    | Cpne8         | 1.630724638 | 2.10396135 | 1.85309618 | 2.3908652 |
| A_55_P1993 | 26091.3 Detected | 32330 Detected    | 23645.2 Detected | 42546.5 Detected  | Taf6          | 1.630677659 | 0.90624844 | 1.3160068  | 0.7313702 |
| A_52_P4680 | 8640.9 Detected  | 9971.2 Detected   | 9070.8 Detected  | 14089.7 Detected  | Alkbh5        | 1.630582462 | 1.04975176 | 1.41303955 | 0.9096999 |
| A_55_P1964 | 1060.5 Detected  | 1303.5 Detected   | 1419.7 Detected  | 1729 Detected     | Mlf2          | 1.630363036 | 1.33870816 | 1.32642885 | 1.0891446 |
| A_51_P3566 | 258801 Detected  | 288813.4 Detected | 358742 Detected  | 421928.7 Detected | Krt19         | 1.63032098  | 1.3861693  | 1.46090417 | 1.2421238 |
| A_51_P4381 | 1656 Detected    | 1871.5 Detected   | 1816.4 Detected  | 2699.3 Detected   | Mapre2        | 1.630012077 | 1.0968599  | 1.442319   | 0.9705584 |
| A_65_P0232 | 122.1 Detected   | 158.4 Detected    | 126.2 Detected   | 199 Detected      | Sec22b        | 1.62981163  | 1.03357903 | 1.25631313 | 0.7967172 |
| A_66_P1027 | 10.8 Not Detect  | 16.7 Detected     | 18 Detected      | 17.6 Not Detect   | Bsph1         | 1.62962963  | 1.66666667 | 1.05389222 | 1.0778443 |
| A_55_P2086 | 5.4 Not Detect   | 41.8 Detected     | 3.2 Not Detect   | 8.8 Not Detect    | Krt85         | 1.62962963  | 0.59259259 | 0.21052632 | 0.076555  |
| A_51_P4790 | 36707.4 Detected | 44487.1 Detected  | 43035.1 Detected | 59819 Detected    | Tars          | 1.629616916 | 1.17238214 | 1.34463698 | 0.9673613 |
| A_52_P3820 | 40.2 Detected    | 66.8 Detected     | 29.5 Detected    | 65.5 Detected     | Zfhx2         | 1.629353234 | 0.73383085 | 0.98053892 | 0.4416168 |
| A_51_P4052 | 159.4 Detected   | 168.9 Detected    | 283.7 Detected   | 259.7 Detected    | Nradd         | 1.62923463  | 1.77979925 | 1.53759621 | 1.6796921 |
| A_55_P2175 | 142.4 Detected   | 131.3 Detected    | 117.9 Detected   | 232 Detected      | Prdm10        | 1.629213483 | 0.82794944 | 1.76694593 | 0.8979436 |
| A_55_P2034 | 2300.5 Detected  | 1881.7 Detected   | 2033.6 Detected  | 3747.9 Detected   | Nmi           | 1.629167572 | 0.88398174 | 1.99176277 | 1.0807249 |
| A_52_P2974 | 36.4 Detected    | 54.8 Detected     | 26.5 Detected    | 59.3 Detected     | 5033411D12Rik | 1.629120879 | 0.72802198 | 1.08211679 | 0.4835766 |
| A_51_P2736 | 109.2 Detected   | 167.5 Detected    | 224 Detected     | 177.9 Detected    | Itpka         | 1.629120879 | 2.05128205 | 1.06208955 | 1.3373134 |
| A_55_P2424 | 378 Detected     | 297.2 Detected    | 366.1 Detected   | 615.8 Detected    | Atg9a         | 1.629100529 | 0.96851852 | 2.07200538 | 1.2318304 |
| A_55_P2084 | 67.1 Detected    | 88.2 Detected     | 59.8 Detected    | 109.3 Detected    | Aptx          | 1.628912072 | 0.89120715 | 1.23922902 | 0.6780045 |
| A_55_P2123 | 554.3 Detected   | 901.2 Detected    | 707.3 Detected   | 902.9 Detected    | Cog2          | 1.628901317 | 1.27602381 | 1.00188637 | 0.7848424 |
| A_55_P2022 | 19973.5 Detected | 14288.9 Detected  | 26297 Detected   | 32531.4 Detected  | 1700021K19Rik | 1.628728065 | 1.31659449 | 2.2766903  | 1.8403796 |
| A_55_P2133 | 2547.6 Detected  | 2716.2 Detected   | 3054.7 Detected  | 4149 Detected     | Etfa          | 1.628591616 | 1.19905009 | 1.52750166 | 1.1246226 |
| A_51_P4278 | 405.1 Detected   | 436.1 Detected    | 424.1 Detected   | 659.7 Detected    | Tmem108       | 1.628486793 | 1.046902   | 1.51272644 | 0.9724834 |
| A_55_P2212 | 263.9 Detected   | 306.9 Detected    | 223.9 Detected   | 429.7 Detected    | Utrn          | 1.628268283 | 0.84842743 | 1.40013034 | 0.7295536 |
| A_55_P2096 | 53254.5 Detected | 70753.4 Detected  | 75928.9 Detected | 86710.7 Detected  | Hax1          | 1.628232356 | 1.42577435 | 1.22553404 | 1.0731484 |
| A_52_P3450 | 107.3 Detected   | 170.2 Detected    | 134.3 Detected   | 174.7 Detected    | Wdr25         | 1.628145387 | 1.25163094 | 1.02643948 | 0.7890717 |
| A_55_P2094 | 2124.6 Detected  | 2233.2 Detected   | 2688.5 Detected  | 3458.3 Detected   | Sox13         | 1.627741693 | 1.26541467 | 1.54858499 | 1.2038778 |
| A_55_P2136 | 4908.3 Detected  | 5386.2 Detected   | 5711.1 Detected  | 7989.4 Detected   | Ppp1r15a      | 1.627732616 | 1.16355968 | 1.4833092  | 1.0603208 |
| A_52_P5205 | 1236.1 Detected  | 1148.9 Detected   | 1387.7 Detected  | 2012 Detected     | Wasl          | 1.627700024 | 1.1226438  | 1.75124032 | 1.207851  |
| A_52_P5125 | 1167 Detected    | 1147.8 Detected   | 896.8 Detected   | 1899.3 Detected   | Atg16l2       | 1.627506427 | 0.76846615 | 1.65473079 | 0.7813208 |
| A_55_P1962 | 8894.1 Detected  | 12281.1 Detected  | 11775 Detected   | 14472.9 Detected  | Max           | 1.627247276 | 1.32391136 | 1.17846936 | 0.9587903 |
| A_51_P2622 | 1410.3 Detected  | 2014.4 Detected   | 2752.7 Detected  | 2294.8 Detected   | Ggact         | 1.627171524 | 1.95185422 | 1.13919778 | 1.3665111 |
| A_52_P8692 | 1681.7 Detected  | 2746.2 Detected   | 1884.3 Detected  | 2736.4 Detected   | Cog2          | 1.62716299  | 1.12047333 | 0.99643143 | 0.6861481 |
| A_55_P2023 | 1842.5 Detected  | 2109.2 Detected   | 2817.7 Detected  | 2997.7 Detected   | Ccdc77        | 1.62697422  | 1.52928087 | 1.42124976 | 1.3359093 |
| A_55_P2092 | 292.6 Detected   | 305.8 Detected    | 437.8 Detected   | 476 Detected      | Gm4132        | 1.626794258 | 1.4962406  | 1.55657292 | 1.4316547 |
| A_52_P1744 | 356.7 Detected   | 867.9 Detected    | 286.7 Detected   | 580.2 Detected    | Galc          | 1.626576955 | 0.80375666 | 0.6685102  | 0.3303376 |
| A_55_P2114 | 3686.9 Detected  | 4329.3 Detected   | 4128.8 Detected  | 5996.5 Detected   | Gdap2         | 1.626434132 | 1.11985679 | 1.3850969  | 0.9536877 |

|            |         |            |         |            |         |            |         |            |               |             |            |            |           |
|------------|---------|------------|---------|------------|---------|------------|---------|------------|---------------|-------------|------------|------------|-----------|
| A_52_P6709 | 3008.5  | Detected   | 1979.7  | Detected   | 2164.8  | Detected   | 4892.7  | Detected   | Nkain1        | 1.626292172 | 0.71956124 | 2.47143507 | 1.093499  |
| A_51_P4024 | 1166.9  | Detected   | 1267    | Detected   | 1488.6  | Detected   | 1897.7  | Detected   | Anxa7         | 1.626274745 | 1.27568772 | 1.49779006 | 1.1749013 |
| A_55_P1984 | 10.7    | Not Detect | 10.9    | Not Detect | 17.9    | Detected   | 17.4    | Not Detect | Rhox2h        | 1.626168224 | 1.6728972  | 1.59633028 | 1.6422018 |
| A_52_P4302 | 7401.4  | Detected   | 9628.1  | Detected   | 4792.7  | Detected   | 12035.8 | Detected   | Heatr2        | 1.626151809 | 0.64753965 | 1.25007011 | 0.4977825 |
| A_52_P3209 | 1426.7  | Detected   | 1807.8  | Detected   | 1699.4  | Detected   | 2319.2  | Detected   | Mt3           | 1.625569496 | 1.19114039 | 1.28288527 | 0.9400376 |
| A_55_P2068 | 2199.3  | Detected   | 1536.4  | Detected   | 3935.2  | Detected   | 3574.9  | Detected   | Cryz11        | 1.625471741 | 1.78929659 | 2.32680292 | 2.5613122 |
| A_52_P5391 | 5741.1  | Detected   | 7115.8  | Detected   | 10130.9 | Detected   | 9330.5  | Detected   | Rdh11         | 1.625211196 | 1.76462699 | 1.31123697 | 1.423719  |
| A_55_P2157 | 422.7   | Detected   | 466.8   | Detected   | 468.6   | Detected   | 686.9   | Detected   | Gm3625        | 1.625029572 | 1.10858765 | 1.47150814 | 1.003856  |
| A_55_P2175 | 155.2   | Detected   | 122.2   | Detected   | 186.8   | Detected   | 252.2   | Detected   | Rbbp6         | 1.625       | 1.20360825 | 2.06382979 | 1.5286416 |
| A_55_P1970 | 109.6   | Detected   | 95.2    | Detected   | 163.1   | Detected   | 178.1   | Detected   | Rdh8          | 1.625       | 1.48813869 | 1.87079832 | 1.7132353 |
| A_55_P2041 | 38.4    | Detected   | 47      | Detected   | 43.7    | Detected   | 62.4    | Detected   | Eya4          | 1.625       | 1.13802083 | 1.32765957 | 0.9297872 |
| A_55_P2162 | 15.2    | Detected   | 46.9    | Detected   | 14.3    | Not Detect | 24.7    | Not Detect | Cnksr2        | 1.625       | 0.94078947 | 0.52665245 | 0.3049041 |
| A_51_P1316 | 666     | Detected   | 1038.7  | Detected   | 740.1   | Detected   | 1081.9  | Detected   | Tsacc         | 1.624474474 | 1.11126126 | 1.04159045 | 0.7125253 |
| A_51_P1457 | 1526.4  | Detected   | 1007.9  | Detected   | 1262.7  | Detected   | 2479.4  | Detected   | Rnf113a2      | 1.624344864 | 0.82724057 | 2.45996627 | 1.2528029 |
| A_55_P2127 | 233.7   | Detected   | 328.8   | Detected   | 194.7   | Detected   | 379.6   | Detected   | Amigo1        | 1.624304664 | 0.83311938 | 1.15450122 | 0.5921533 |
| A_51_P1899 | 1481.7  | Detected   | 1384.4  | Detected   | 1705.2  | Detected   | 2406.6  | Detected   | Oxsr1         | 1.624215428 | 1.15084025 | 1.73837041 | 1.2317249 |
| A_51_P3375 | 523.1   | Detected   | 608.1   | Detected   | 741.4   | Detected   | 849.6   | Detected   | 2410131K14Rik | 1.62416364  | 1.41731982 | 1.39713863 | 1.2192074 |
| A_52_P1980 | 418     | Detected   | 478.1   | Detected   | 842.7   | Detected   | 678.9   | Detected   | Fuz           | 1.624162679 | 2.01602871 | 1.41999582 | 1.762602  |
| A_55_P2076 | 905.6   | Detected   | 969.9   | Detected   | 1195.9  | Detected   | 1470.8  | Detected   | Zfp661        | 1.624116608 | 1.32056095 | 1.51644499 | 1.2330137 |
| A_51_P4622 | 31.9    | Detected   | 48.6    | Detected   | 32.2    | Detected   | 51.8    | Detected   | Acan          | 1.623824451 | 1.00940439 | 1.06584362 | 0.6625514 |
| A_55_P2134 | 48.9    | Detected   | 63.6    | Detected   | 71.2    | Detected   | 79.4    | Detected   | Gm5132        | 1.623721881 | 1.45603272 | 1.24842767 | 1.1194969 |
| A_55_P2076 | 24.7    | Detected   | 50.4    | Detected   | 18.8    | Detected   | 40.1    | Not Detect | Lnx1          | 1.623481781 | 0.7611336  | 0.79563492 | 0.3730159 |
| A_55_P1986 | 28.4    | Detected   | 47.6    | Detected   | 28.8    | Detected   | 46.1    | Detected   | Tbc1d32       | 1.623239437 | 1.01408451 | 0.96848739 | 0.605042  |
| A_55_P1958 | 287.7   | Detected   | 404.4   | Detected   | 338     | Detected   | 467     | Detected   | Zdhhc17       | 1.623218631 | 1.1748349  | 1.15479723 | 0.8358061 |
| A_55_P2126 | 140.9   | Detected   | 147     | Detected   | 182.7   | Detected   | 228.7   | Detected   | Srl           | 1.623136977 | 1.2966643  | 1.55578231 | 1.2428571 |
| A_51_P1439 | 10768.3 | Detected   | 9174.9  | Detected   | 16570.7 | Detected   | 17477.9 | Detected   | Rnf181        | 1.623088138 | 1.53884086 | 1.90496899 | 1.8060905 |
| A_52_P9161 | 751.5   | Detected   | 776     | Detected   | 907.8   | Detected   | 1219.7  | Detected   | Lysmd3        | 1.623020625 | 1.20798403 | 1.57177835 | 1.1698454 |
| A_55_P2066 | 280.3   | Detected   | 287     | Detected   | 315.3   | Detected   | 454.9   | Detected   | Limk2         | 1.622904031 | 1.12486621 | 1.58501742 | 1.0986063 |
| A_52_P5374 | 2903.6  | Detected   | 4170.8  | Detected   | 2814.6  | Detected   | 4712    | Detected   | Zfp330        | 1.62281306  | 0.9693484  | 1.12975928 | 0.6748346 |
| A_66_P1014 | 1247.1  | Detected   | 1505.8  | Detected   | 1945.9  | Detected   | 2023.7  | Detected   | Fbxl3         | 1.622724721 | 1.56033999 | 1.34393678 | 1.2922699 |
| A_55_P1963 | 3343.6  | Detected   | 4121.8  | Detected   | 5430.2  | Detected   | 5425.6  | Detected   | Mtmr14        | 1.622682139 | 1.6240579  | 1.31631811 | 1.3174341 |
| A_52_P3605 | 51.4    | Detected   | 49.2    | Detected   | 11.6    | Not Detect | 83.4    | Detected   | Celsr2        | 1.622568093 | 0.22568093 | 1.69512195 | 0.2357724 |
| A_55_P2081 | 60.4    | Detected   | 39.5    | Detected   | 20.2    | Detected   | 98      | Detected   | Tex38         | 1.622516556 | 0.33443709 | 2.48101266 | 0.5113924 |
| A_55_P2065 | 36      | Detected   | 55.2    | Detected   | 37.6    | Detected   | 58.4    | Detected   | Snx29         | 1.622222222 | 1.04444444 | 1.05797101 | 0.6811594 |
| A_55_P1988 | 8422.9  | Detected   | 8061.5  | Detected   | 7428.3  | Detected   | 13663.6 | Detected   | Slc17a5       | 1.622196631 | 0.88191715 | 1.6949203  | 0.9214538 |
| A_55_P2160 | 366.3   | Detected   | 526.5   | Detected   | 273.8   | Detected   | 594.2   | Detected   | Wrn           | 1.622167622 | 0.74747475 | 1.128585   | 0.520038  |
| A_55_P2032 | 1397.6  | Detected   | 1042.8  | Detected   | 1207    | Detected   | 2267.1  | Detected   | Dnase111      | 1.622137951 | 0.86362335 | 2.17405063 | 1.1574607 |
| A_55_P2057 | 91      | Detected   | 130.7   | Detected   | 91.9    | Detected   | 147.6   | Detected   | Gm6566        | 1.621978022 | 1.00989011 | 1.12930375 | 0.703137  |
| A_55_P2462 | 11671.1 | Detected   | 13184.1 | Detected   | 17979.1 | Detected   | 18929.8 | Detected   | Fam118b       | 1.621937949 | 1.54048033 | 1.43580525 | 1.3636957 |
| A_52_P6622 | 55      | Detected   | 80.6    | Detected   | 81.4    | Detected   | 89.2    | Detected   | Rab33a        | 1.621818182 | 1.48       | 1.10669975 | 1.0099256 |

|            |                  |                  |                  |                  |               |             |            |            |           |
|------------|------------------|------------------|------------------|------------------|---------------|-------------|------------|------------|-----------|
| A_51_P2979 | 187.2 Detected   | 187.3 Detected   | 186.8 Detected   | 303.6 Detected   | Zc3h12a       | 1.621794872 | 0.99786325 | 1.62092899 | 0.9973305 |
| A_51_P1391 | 32.5 Detected    | 26.8 Detected    | 17.9 Detected    | 52.7 Detected    | Fank1         | 1.621538462 | 0.55076923 | 1.96641791 | 0.6679104 |
| A_55_P2010 | 654.2 Detected   | 686.8 Detected   | 548.9 Detected   | 1060.8 Detected  | Zfp113        | 1.62152247  | 0.83904005 | 1.54455446 | 0.7992137 |
| A_55_P2108 | 30061.7 Detected | 33832.1 Detected | 37638.8 Detected | 48744.3 Detected | Arcn1         | 1.621475166 | 1.25205161 | 1.44077075 | 1.1125174 |
| A_55_P2179 | 6473.4 Detected  | 6545.6 Detected  | 6583 Detected    | 10494 Detected   | Man1a2        | 1.62109556  | 1.01693082 | 1.60321437 | 1.0057138 |
| A_55_P1995 | 9065.5 Detected  | 11274 Detected   | 8669.8 Detected  | 14695.3 Detected | Lonp2         | 1.621013733 | 0.956351   | 1.30346816 | 0.7690083 |
| A_55_P1994 | 3106.1 Detected  | 3861 Detected    | 4219.8 Detected  | 5034.8 Detected  | Ccdc174       | 1.620939442 | 1.35855253 | 1.3040145  | 1.0929293 |
| A_51_P3599 | 3226 Detected    | 2614.5 Detected  | 3105.1 Detected  | 5229.1 Detected  | Arhgap17      | 1.620923745 | 0.96252325 | 2.00003825 | 1.1876458 |
| A_55_P1999 | 7423.8 Detected  | 7619.8 Detected  | 7850.3 Detected  | 12033.1 Detected | Tdrd7         | 1.620881489 | 1.05745036 | 1.57918843 | 1.0302501 |
| A_55_P2041 | 44.3 Detected    | 61.7 Detected    | 61.4 Detected    | 71.8 Detected    | Hoxa11os      | 1.620767494 | 1.38600451 | 1.1636953  | 0.9951378 |
| A_55_P1976 | 20.3 Detected    | 15.7 Not Detect  | 15.2 Not Detect  | 32.9 Not Detect  | Zfp551        | 1.620689655 | 0.74876847 | 2.0955414  | 0.9681529 |
| A_66_P1129 | 14.5 Detected    | 16.8 Detected    | 27.3 Detected    | 23.5 Not Detect  | Npy4r         | 1.620689655 | 1.88275862 | 1.39880952 | 1.625     |
| A_52_P6610 | 14530 Detected   | 17129.6 Detected | 16127.8 Detected | 23548.4 Detected | Snhg3         | 1.620674467 | 1.10996559 | 1.37471978 | 0.9415164 |
| A_55_P1989 | 1709.1 Detected  | 1899.1 Detected  | 1593.2 Detected  | 2769.8 Detected  | Fam149b       | 1.620619039 | 0.93218653 | 1.45848033 | 0.8389237 |
| A_66_P1109 | 13.7 Not Detect  | 8.7 Not Detect   | 20.3 Detected    | 22.2 Not Detect  | Dgki          | 1.620437956 | 1.48175182 | 2.55172414 | 2.3333333 |
| A_51_P4126 | 2378.6 Detected  | 2296.2 Detected  | 2727.1 Detected  | 3853.7 Detected  | Ccdc51        | 1.620154713 | 1.14651476 | 1.67829457 | 1.1876579 |
| A_55_P2077 | 18891.7 Detected | 18270.5 Detected | 18813.3 Detected | 30606 Detected   | Mcidas        | 1.620076542 | 0.99585003 | 1.67515941 | 1.0297091 |
| A_51_P5038 | 3312.4 Detected  | 3271.9 Detected  | 2963.7 Detected  | 5365.7 Detected  | Edem1         | 1.619882864 | 0.8947289  | 1.63993398 | 0.905804  |
| A_55_P2182 | 14.2 Detected    | 12.7 Not Detect  | 12.1 Not Detect  | 23 Not Detect    | Mnx1          | 1.61971831  | 0.85211268 | 1.81102362 | 0.9527559 |
| A_52_P1565 | 143.8 Detected   | 162.6 Detected   | 121.7 Detected   | 232.9 Detected   | Fkbp15        | 1.61961057  | 0.84631433 | 1.43234932 | 0.7484625 |
| A_52_P5929 | 25879.3 Detected | 32258.7 Detected | 31837.4 Detected | 41909.7 Detected | Ostc          | 1.619429428 | 1.23022647 | 1.29917511 | 0.98694   |
| A_55_P2100 | 247.9 Detected   | 340 Detected     | 267 Detected     | 401.4 Detected   | Gas2l3        | 1.619201291 | 1.0770472  | 1.18058824 | 0.7852941 |
| A_51_P4060 | 24320 Detected   | 24810.1 Detected | 42647.1 Detected | 39378.2 Detected | 1110001J03Rik | 1.619169408 | 1.75358141 | 1.58718425 | 1.7189411 |
| A_55_P1995 | 33.6 Detected    | 31.2 Detected    | 22.8 Detected    | 54.4 Detected    | Olfir209      | 1.619047619 | 0.67857143 | 1.74358974 | 0.7307692 |
| A_51_P2566 | 244 Detected     | 886.8 Detected   | 3.6 Not Detect   | 395 Detected     | Pon3          | 1.618852459 | 0.0147541  | 0.44542174 | 0.0040595 |
| A_55_P2042 | 68.2 Detected    | 85.8 Detected    | 81.4 Detected    | 110.4 Detected   | Lrrc16b       | 1.618768328 | 1.19354839 | 1.28671329 | 0.9487179 |
| A_51_P4279 | 1591.1 Detected  | 1507.3 Detected  | 1651.6 Detected  | 2575.5 Detected  | Megf8         | 1.618691471 | 1.03802401 | 1.7086844  | 1.0957341 |
| A_52_P3380 | 318.1 Detected   | 400.7 Detected   | 400.5 Detected   | 514.9 Detected   | Fndc3a        | 1.618673373 | 1.25903804 | 1.28500125 | 0.9995009 |
| A_55_P2105 | 1035.9 Detected  | 1094.9 Detected  | 1165 Detected    | 1676.4 Detected  | Fam175a       | 1.618302925 | 1.12462593 | 1.53109873 | 1.0640241 |
| A_55_P1985 | 36.9 Detected    | 40.2 Detected    | 67.6 Detected    | 59.7 Detected    | Mcoln1        | 1.617886179 | 1.83197832 | 1.48507463 | 1.681592  |
| A_51_P3236 | 18340.5 Detected | 18856 Detected   | 25057 Detected   | 29668.3 Detected | Vimp          | 1.617638559 | 1.36621139 | 1.5734143  | 1.3288608 |
| A_55_P2070 | 8875.1 Detected  | 7092.8 Detected  | 9614 Detected    | 14355.1 Detected | Tyw1          | 1.617457831 | 1.0832554  | 2.02389747 | 1.3554591 |
| A_55_P2166 | 2876.7 Detected  | 3336.2 Detected  | 3849.2 Detected  | 4651.8 Detected  | Tmem128       | 1.617061216 | 1.33806097 | 1.39434087 | 1.1537678 |
| A_55_P2039 | 4327.5 Detected  | 6540.9 Detected  | 5727.1 Detected  | 6997.5 Detected  | Mboat2        | 1.616984402 | 1.32341999 | 1.06980691 | 0.8755829 |
| A_55_P2131 | 4583.7 Detected  | 4571.4 Detected  | 3944.1 Detected  | 7411.4 Detected  |               | 1.616903375 | 0.86046207 | 1.62125388 | 0.8627773 |
| A_66_P1211 | 7999.3 Detected  | 12544.4 Detected | 8693.5 Detected  | 12933.2 Detected | Katnb1        | 1.616791469 | 1.08678259 | 1.03099391 | 0.6930184 |
| A_55_P2073 | 1735.7 Detected  | 1424.9 Detected  | 3123.7 Detected  | 2806.2 Detected  | Tfdp2         | 1.616754047 | 1.79967736 | 1.96940136 | 2.192224  |
| A_55_P2140 | 18 Detected      | 102.7 Detected   | 48.6 Detected    | 29.1 Not Detect  | Krt39         | 1.616666667 | 2.7        | 0.28334956 | 0.473223  |
| A_51_P2140 | 10374 Detected   | 7255.8 Detected  | 15830.5 Detected | 16770.3 Detected | 2310039H08Rik | 1.616570272 | 1.52597841 | 2.31129579 | 2.1817718 |
| A_55_P1977 | 65.2 Detected    | 65.6 Detected    | 54.9 Detected    | 105.4 Detected   | Itgam         | 1.616564417 | 0.84202454 | 1.60670732 | 0.8368902 |

|            |                  |                  |                  |                  |               |             |            |            |           |
|------------|------------------|------------------|------------------|------------------|---------------|-------------|------------|------------|-----------|
| A_55_P2042 | 361.2 Detected   | 439.4 Detected   | 587.9 Detected   | 583.9 Detected   | Ormdl2        | 1.616555925 | 1.62763012 | 1.32885753 | 1.3379609 |
| A_55_P2023 | 698.8 Detected   | 817.7 Detected   | 883.6 Detected   | 1129.5 Detected  | Pgap1         | 1.616342301 | 1.26445335 | 1.38131344 | 1.0805919 |
| A_51_P4213 | 51.6 Detected    | 46.1 Detected    | 48.1 Detected    | 83.4 Detected    | Caly          | 1.61627907  | 0.93217054 | 1.80911063 | 1.0433839 |
| A_52_P6163 | 1198.1 Detected  | 1630.4 Detected  | 1022.3 Detected  | 1936.4 Detected  | Sbno2         | 1.616225691 | 0.85326767 | 1.187684   | 0.627024  |
| A_51_P2804 | 3643.4 Detected  | 2954.1 Detected  | 5135.3 Detected  | 5888.5 Detected  | Sdf2l1        | 1.616210133 | 1.40948016 | 1.9933313  | 1.7383636 |
| A_51_P3909 | 72.6 Detected    | 79.3 Detected    | 94.8 Detected    | 117.3 Detected   | Sloc43a3      | 1.615702479 | 1.30578512 | 1.47919294 | 1.1954603 |
| A_55_P2108 | 5.2 Not Detect   | 16.6 Detected    | 3 Not Detect     | 8.4 Not Detect   | Armcx6        | 1.615384615 | 0.57692308 | 0.5060241  | 0.1807229 |
| A_55_P2074 | 24.7 Detected    | 279.2 Detected   | 8.8 Not Detect   | 39.9 Not Detect  | Prkar1b       | 1.615384615 | 0.3562753  | 0.14290831 | 0.0315186 |
| A_55_P2162 | 5035.4 Detected  | 5429.5 Detected  | 4451 Detected    | 8134.1 Detected  | Fbxo31        | 1.615383088 | 0.88394169 | 1.49813058 | 0.8197808 |
| A_55_P2170 | 11594.4 Detected | 14723.6 Detected | 11041.1 Detected | 18727.3 Detected | Rheb          | 1.615202167 | 0.95227869 | 1.27192399 | 0.7498913 |
| A_55_P2063 | 531.4 Detected   | 665.6 Detected   | 713.3 Detected   | 858.3 Detected   | Matk          | 1.615167482 | 1.34230335 | 1.28951322 | 1.0716647 |
| A_52_P3514 | 943.3 Detected   | 1231.6 Detected  | 1909.9 Detected  | 1523.4 Detected  | Sgsm3         | 1.614968727 | 2.02470052 | 1.23692757 | 1.550747  |
| A_55_P1968 | 1098.6 Detected  | 1212.8 Detected  | 1392.5 Detected  | 1774.1 Detected  | Stk38l        | 1.614873475 | 1.2675223  | 1.46281332 | 1.1481695 |
| A_52_P2165 | 661.6 Detected   | 789.5 Detected   | 737.3 Detected   | 1068 Detected    | Fbxw8         | 1.61426844  | 1.11441959 | 1.35275491 | 0.9338822 |
| A_51_P4526 | 217.5 Detected   | 406.9 Detected   | 274.6 Detected   | 351.1 Detected   | Tlr2          | 1.614252874 | 1.26252874 | 0.86286557 | 0.6748587 |
| A_51_P4129 | 60.9 Detected    | 259.1 Detected   | 65.2 Detected    | 98.3 Detected    | Efs           | 1.614121511 | 1.07060755 | 0.3793902  | 0.2516403 |
| A_52_P3239 | 279.1 Detected   | 412.3 Detected   | 211.6 Detected   | 450.5 Detected   | Farsa         | 1.614116804 | 0.7581512  | 1.09265098 | 0.5132185 |
| A_55_P2078 | 21.5 Detected    | 21.1 Detected    | 11.9 Not Detect  | 34.7 Not Detect  | Olfir95       | 1.613953488 | 0.55348837 | 1.64454976 | 0.563981  |
| A_55_P2009 | 6851.1 Detected  | 2438.5 Detected  | 9974.4 Detected  | 11057.2 Detected | Trib3         | 1.61393061  | 1.455883   | 4.5344269  | 4.0903834 |
| A_55_P2069 | 68.1 Detected    | 84.7 Detected    | 78.5 Detected    | 109.9 Detected   | Anapc15       | 1.613803231 | 1.15271659 | 1.29752066 | 0.9268005 |
| A_55_P2010 | 97.1 Detected    | 26.7 Detected    | 446.6 Detected   | 156.7 Detected   | Serpina1c     | 1.613800206 | 4.59938208 | 5.86891386 | 16.726592 |
| A_51_P3048 | 1390.2 Detected  | 1228.3 Detected  | 2099.2 Detected  | 2243.4 Detected  | Zfand6        | 1.613724644 | 1.50999856 | 1.82642677 | 1.7090287 |
| A_52_P1655 | 129.9 Detected   | 155.1 Detected   | 153.8 Detected   | 209.6 Detected   | Fancg         | 1.613548884 | 1.18398768 | 1.3513862  | 0.9916183 |
| A_55_P2320 | 35.7 Detected    | 32.9 Detected    | 48.4 Detected    | 57.6 Detected    | Hmga2-ps1     | 1.613445378 | 1.3557423  | 1.75075988 | 1.4711246 |
| A_55_P2125 | 9431.3 Detected  | 11413.4 Detected | 15240.1 Detected | 15216.1 Detected | Gm11127       | 1.613361891 | 1.61590661 | 1.33317854 | 1.3352813 |
| A_52_P5545 | 60 Detected      | 85.5 Detected    | 84 Detected      | 96.8 Detected    | Klhdc1        | 1.613333333 | 1.4        | 1.13216374 | 0.9824561 |
| A_51_P4417 | 2106.3 Detected  | 4661.9 Detected  | 3112.7 Detected  | 3398.1 Detected  | Micu2         | 1.613302948 | 1.47780468 | 0.72890881 | 0.6676891 |
| A_55_P1981 | 153.5 Detected   | 117.4 Detected   | 160 Detected     | 247.6 Detected   | Grm1          | 1.613029316 | 1.04234528 | 2.10902896 | 1.362862  |
| A_51_P4455 | 6.2 Not Detect   | 17.8 Detected    | 7.5 Not Detect   | 10 Not Detect    | Chst10        | 1.612903226 | 1.20967742 | 0.56179775 | 0.4213483 |
| A_55_P2027 | 2094.5 Detected  | 2890.5 Detected  | 2880.8 Detected  | 3378.1 Detected  | Engase        | 1.612843161 | 1.37541179 | 1.16869054 | 0.9966442 |
| A_55_P2017 | 7505.3 Detected  | 16033.4 Detected | 6273.4 Detected  | 12104.8 Detected | Tap2          | 1.612833598 | 0.83586266 | 0.75497399 | 0.3912707 |
| A_55_P2187 | 253.6 Detected   | 295.4 Detected   | 260.9 Detected   | 409 Detected     | 4930560O18Rik | 1.612776025 | 1.02878549 | 1.3845633  | 0.8832092 |
| A_51_P3967 | 35200.8 Detected | 44869.8 Detected | 40076.1 Detected | 56766.2 Detected | Arl2bp        | 1.612639485 | 1.13849969 | 1.26513156 | 0.8931642 |
| A_52_P1272 | 28.9 Detected    | 31.8 Detected    | 36.4 Detected    | 46.6 Detected    | Gm9           | 1.612456747 | 1.25951557 | 1.46540881 | 1.1446541 |
| A_55_P1977 | 55.2 Detected    | 64.8 Detected    | 59.3 Detected    | 89 Detected      | Pde11a        | 1.612318841 | 1.07427536 | 1.37345679 | 0.9151235 |
| A_51_P3592 | 734.7 Detected   | 843.4 Detected   | 753.7 Detected   | 1184.5 Detected  | Ubxn2b        | 1.612222676 | 1.0258609  | 1.40443443 | 0.8936448 |
| A_51_P2865 | 7432.1 Detected  | 6764.8 Detected  | 6907.6 Detected  | 11980.9 Detected | Gna13         | 1.612047739 | 0.92942775 | 1.77106492 | 1.0211093 |
| A_52_P6497 | 29.9 Detected    | 26.6 Detected    | 40.8 Detected    | 48.2 Not Detect  | Smyd3         | 1.612040134 | 1.36454849 | 1.81203008 | 1.5338346 |
| A_51_P1411 | 137.9 Detected   | 151.4 Detected   | 174.1 Detected   | 222.3 Detected   | Dffa          | 1.612037708 | 1.26250906 | 1.4682959  | 1.1499339 |
| A_55_P2095 | 1422.9 Detected  | 1655.4 Detected  | 1549.7 Detected  | 2293.3 Detected  | Lamtor3       | 1.611708483 | 1.08911378 | 1.38534493 | 0.9361484 |

|            |         |            |         |            |         |          |         |            |               |             |            |            |           |
|------------|---------|------------|---------|------------|---------|----------|---------|------------|---------------|-------------|------------|------------|-----------|
| A_51_P1131 | 1197.4  | Detected   | 573.7   | Detected   | 2944    | Detected | 1929.7  | Detected   | Upk1b         | 1.611575079 | 2.45866043 | 3.36360467 | 5.1316019 |
| A_55_P2266 | 12046.7 | Detected   | 8959.6  | Detected   | 22535.2 | Detected | 19413.9 | Detected   | Ahcy12        | 1.611553371 | 1.87065337 | 2.16682664 | 2.5152016 |
| A_55_P2119 | 628.6   | Detected   | 491.7   | Detected   | 603.6   | Detected | 1012.9  | Detected   | Mapk1ip1      | 1.611358575 | 0.96022908 | 2.05999593 | 1.2275778 |
| A_55_P2062 | 644     | Detected   | 753.9   | Detected   | 1003.5  | Detected | 1037.7  | Detected   | Etv3          | 1.611335404 | 1.55822981 | 1.3764425  | 1.3310784 |
| A_55_P2234 | 56.6    | Detected   | 52.3    | Detected   | 217.9   | Detected | 91.2    | Detected   | 9330195124Rik | 1.61130742  | 3.84982332 | 1.74378585 | 4.166348  |
| A_55_P2029 | 835.1   | Detected   | 1218.5  | Detected   | 630.3   | Detected | 1345.6  | Detected   | Hmox1         | 1.611304035 | 0.75475991 | 1.10430858 | 0.5172753 |
| A_55_P2172 | 30.1    | Detected   | 32.6    | Detected   | 25.9    | Detected | 48.5    | Not Detect | Wdr92         | 1.611295681 | 0.86046512 | 1.48773006 | 0.7944785 |
| A_52_P3828 | 712.1   | Detected   | 603.3   | Detected   | 861.6   | Detected | 1147.3  | Detected   | Bloc1s3       | 1.611150119 | 1.20994242 | 1.90170728 | 1.4281452 |
| A_55_P1972 | 39467.3 | Detected   | 44584.8 | Detected   | 55096.8 | Detected | 63580.6 | Detected   | Sars          | 1.610969081 | 1.39601138 | 1.42606    | 1.2357754 |
| A_51_P4320 | 23.9    | Detected   | 19.3    | Not Detect | 23.9    | Detected | 38.5    | Not Detect | Trrap         | 1.610878661 | 1          | 1.99481865 | 1.238342  |
| A_55_P2065 | 8051.4  | Detected   | 9938    | Detected   | 8179.9  | Detected | 12969   | Detected   | Kdm5b         | 1.610775766 | 1.01595996 | 1.30499094 | 0.8230932 |
| A_51_P1791 | 3606.9  | Detected   | 3493.2  | Detected   | 7712.4  | Detected | 5809    | Detected   | Vasp          | 1.610524273 | 2.13823505 | 1.66294515 | 2.2078324 |
| A_51_P3328 | 25314.5 | Detected   | 42993.2 | Detected   | 24398   | Detected | 40769   | Detected   | Abce1         | 1.610499911 | 0.96379545 | 0.94826624 | 0.5674851 |
| A_55_P2191 | 102.4   | Detected   | 105.1   | Detected   | 86.1    | Detected | 164.9   | Detected   | 2610027K06Rik | 1.610351563 | 0.84082031 | 1.56898192 | 0.8192198 |
| A_55_P2116 | 11335.3 | Detected   | 15160.4 | Detected   | 15513.7 | Detected | 18252.3 | Detected   | Hax1          | 1.610217639 | 1.36861839 | 1.20394581 | 1.0233041 |
| A_55_P1958 | 26033   | Detected   | 24755.3 | Detected   | 36905   | Detected | 41912.1 | Detected   | Got1          | 1.609960435 | 1.41762379 | 1.69305563 | 1.4907919 |
| A_55_P2155 | 2148.6  | Detected   | 2305.3  | Detected   | 2586    | Detected | 3459    | Detected   | Ezh1          | 1.609885507 | 1.20357442 | 1.50045547 | 1.1217629 |
| A_51_P3453 | 711.3   | Detected   | 2671.9  | Detected   | 514.9   | Detected | 1145.1  | Detected   | Psmb8         | 1.609869253 | 0.72388584 | 0.42857143 | 0.1927093 |
| A_51_P5125 | 4710.2  | Detected   | 5810    | Detected   | 5681.3  | Detected | 7582.8  | Detected   | Cdc42se1      | 1.609867946 | 1.20616959 | 1.30512909 | 0.9778485 |
| A_55_P2185 | 1925.7  | Detected   | 2269.5  | Detected   | 2164.9  | Detected | 3100.1  | Detected   | Cln3          | 1.609856156 | 1.12421457 | 1.3659837  | 0.9539106 |
| A_55_P2055 | 66.1    | Detected   | 81.4    | Detected   | 62.5    | Detected | 106.4   | Detected   | Fbxo25        | 1.6096823   | 0.94553707 | 1.30712531 | 0.7678133 |
| A_55_P2090 | 13830.6 | Detected   | 18695.1 | Detected   | 12593.7 | Detected | 22252.7 | Detected   | Ebna1bp2      | 1.608946828 | 0.91056787 | 1.19029585 | 0.6736364 |
| A_55_P1980 | 3575.5  | Detected   | 5267.3  | Detected   | 4334.7  | Detected | 5751.2  | Detected   | Mettl23       | 1.608502307 | 1.21233394 | 1.0918687  | 0.8229453 |
| A_51_P3101 | 21.2    | Detected   | 22.6    | Detected   | 22.9    | Detected | 34.1    | Not Detect | 2810459M11Rik | 1.608490566 | 1.08018868 | 1.50884956 | 1.0132743 |
| A_52_P5556 | 5915.3  | Detected   | 7485.8  | Detected   | 8023.5  | Detected | 9514    | Detected   | Trappc12      | 1.608371511 | 1.35639782 | 1.27093965 | 1.0718293 |
| A_55_P2183 | 2570.3  | Detected   | 5125    | Detected   | 2989.3  | Detected | 4133.4  | Detected   | Spcc3         | 1.608139128 | 1.16301599 | 0.80651707 | 0.583278  |
| A_55_P2303 | 144.4   | Detected   | 151.5   | Detected   | 223     | Detected | 232.2   | Detected   | D830044D21Rik | 1.608033241 | 1.54432133 | 1.53267327 | 1.4719472 |
| A_55_P1958 | 12.5    | Not Detect | 12.9    | Not Detect | 19      | Detected | 20.1    | Not Detect | Gm7550        | 1.608       | 1.52       | 1.55813953 | 1.4728682 |
| A_51_P2209 | 2319.3  | Detected   | 2583.6  | Detected   | 4049.4  | Detected | 3728.8  | Detected   | Vstm5         | 1.607726469 | 1.74595783 | 1.44325747 | 1.5673479 |
| A_55_P2256 | 44.6    | Detected   | 51.5    | Detected   | 36.9    | Detected | 71.7    | Detected   | 4930506C21Rik | 1.607623318 | 0.82735426 | 1.39223301 | 0.7165049 |
| A_52_P6503 | 6438.1  | Detected   | 9156.4  | Detected   | 8739.8  | Detected | 10349.6 | Detected   | Strap         | 1.607555024 | 1.35751231 | 1.13031322 | 0.9545018 |
| A_51_P4287 | 673.2   | Detected   | 1244.1  | Detected   | 987.5   | Detected | 1082.2  | Detected   | Pus7l         | 1.607546049 | 1.46687463 | 0.86986577 | 0.7937465 |
| A_55_P2059 | 3514.8  | Detected   | 3538.8  | Detected   | 3839.8  | Detected | 5649.8  | Detected   | Snx7          | 1.607431433 | 1.09246614 | 1.5965299  | 1.0850571 |
| A_55_P2033 | 2157    | Detected   | 3521.8  | Detected   | 2019.9  | Detected | 3467.1  | Detected   | Fut10         | 1.607371349 | 0.9364395  | 0.98446817 | 0.5735419 |
| A_66_P1198 | 1373.7  | Detected   | 1011.6  | Detected   | 1621.5  | Detected | 2208    | Detected   | Optn          | 1.607337847 | 1.18038873 | 2.1826809  | 1.6029063 |
| A_55_P2157 | 112.3   | Detected   | 103.4   | Detected   | 109.2   | Detected | 180.5   | Detected   | Gm5741        | 1.60730187  | 0.97239537 | 1.74564797 | 1.0560928 |
| A_66_P1106 | 93.7    | Detected   | 97.5    | Detected   | 107.7   | Detected | 150.6   | Detected   | Sqstm1        | 1.607257204 | 1.14941302 | 1.54461538 | 1.1046154 |
| A_55_P1957 | 5533.3  | Detected   | 4753.8  | Detected   | 5959.8  | Detected | 8892.9  | Detected   | Tmub1         | 1.607160284 | 1.07707878 | 1.87069292 | 1.2536918 |
| A_66_P1325 | 409.3   | Detected   | 468.1   | Detected   | 422.5   | Detected | 657.8   | Detected   | Chmp4c        | 1.607134131 | 1.03225018 | 1.40525529 | 0.9025849 |
| A_55_P2344 | 51.1    | Detected   | 43.3    | Detected   | 70.5    | Detected | 82.1    | Detected   | D7Wsu130e     | 1.60665362  | 1.37964775 | 1.8960739  | 1.6281755 |



|            |         |            |         |          |         |            |         |            |               |             |            |            |           |
|------------|---------|------------|---------|----------|---------|------------|---------|------------|---------------|-------------|------------|------------|-----------|
| A_52_P2444 | 256.9   | Detected   | 374.6   | Detected | 326.9   | Detected   | 412.7   | Detected   | D16Ert472e    | 1.606461658 | 1.27247956 | 1.10170849 | 0.8726642 |
| A_66_P1086 | 4614.3  | Detected   | 5670.5  | Detected | 5211.3  | Detected   | 7409.5  | Detected   | Mtg1          | 1.605769022 | 1.1293804  | 1.3066749  | 0.9190195 |
| A_55_P1990 | 97.9    | Detected   | 115.8   | Detected | 98.8    | Detected   | 157.2   | Detected   | Dclre1b       | 1.605720123 | 1.00919305 | 1.35751295 | 0.8531952 |
| A_55_P2132 | 8950.9  | Detected   | 8844.5  | Detected | 11427.8 | Detected   | 14372   | Detected   | 1810037117Rik | 1.605648594 | 1.27672078 | 1.62496467 | 1.2920798 |
| A_52_P9574 | 2234.5  | Detected   | 2464    | Detected | 1920.5  | Detected   | 3587.3  | Detected   | Smim19        | 1.605415082 | 0.85947639 | 1.45588474 | 0.7794237 |
| A_51_P1586 | 287.1   | Detected   | 346.7   | Detected | 539.9   | Detected   | 460.9   | Detected   | Ggnbp1        | 1.605363985 | 1.88052943 | 1.3293914  | 1.5572541 |
| A_52_P5885 | 1297.9  | Detected   | 1349.8  | Detected | 1596.3  | Detected   | 2083.6  | Detected   | Snapiin       | 1.605362509 | 1.22990985 | 1.54363609 | 1.1826196 |
| A_55_P2057 | 4856.9  | Detected   | 3208.4  | Detected | 7912.1  | Detected   | 7795.8  | Detected   | Magi1         | 1.605097902 | 1.62904322 | 2.42980925 | 2.4660578 |
| A_55_P2067 | 11.9    | Not Detect | 25.1    | Detected | 30.3    | Detected   | 19.1    | Not Detect | Dpep2         | 1.605042017 | 2.54621849 | 0.76095618 | 1.2071713 |
| A_55_P2072 | 439     | Detected   | 442.4   | Detected | 451.6   | Detected   | 704.6   | Detected   | Lypd5         | 1.60501139  | 1.02870159 | 1.59267631 | 1.0207957 |
| A_55_P1984 | 1193.3  | Detected   | 1366.8  | Detected | 1495.8  | Detected   | 1915.2  | Detected   | Parp4         | 1.604961032 | 1.2534987  | 1.40122915 | 1.094381  |
| A_51_P1678 | 375     | Detected   | 539.1   | Detected | 650.6   | Detected   | 601.8   | Detected   | Tfrc          | 1.6048      | 1.73493333 | 1.11630495 | 1.2068262 |
| A_51_P4454 | 433.7   | Detected   | 311.9   | Detected | 548.6   | Detected   | 696     | Detected   | Mturn         | 1.604795942 | 1.26492967 | 2.23148445 | 1.7588971 |
| A_51_P3698 | 10535.5 | Detected   | 13398.2 | Detected | 11529.4 | Detected   | 16906.1 | Detected   | Nceh1         | 1.604679417 | 1.09433819 | 1.26181875 | 0.8605186 |
| A_55_P1976 | 1037.4  | Detected   | 1153.9  | Detected | 1157.5  | Detected   | 1664.6  | Detected   | Hsd12         | 1.604588394 | 1.11577019 | 1.44258601 | 1.0031199 |
| A_55_P2051 | 455     | Detected   | 683.1   | Detected | 457.1   | Detected   | 730     | Detected   | Cbr4          | 1.604395604 | 1.00461538 | 1.06865759 | 0.6691553 |
| A_51_P2716 | 624.2   | Detected   | 523.7   | Detected | 895.2   | Detected   | 1001.4  | Detected   | Hps1          | 1.604293496 | 1.43415572 | 1.91216345 | 1.7093756 |
| A_55_P2014 | 1543.3  | Detected   | 1390.3  | Detected | 1787.1  | Detected   | 2475.8  | Detected   | Zfp82         | 1.604224713 | 1.15797317 | 1.78076674 | 1.285406  |
| A_52_P5101 | 37.9    | Detected   | 61.1    | Detected | 54      | Detected   | 60.8    | Detected   | Acrbp         | 1.604221636 | 1.42480211 | 0.99509002 | 0.8837971 |
| A_51_P2828 | 28.8    | Detected   | 108.3   | Detected | 25.8    | Detected   | 46.2    | Not Detect | St14          | 1.604166667 | 0.89583333 | 0.4265928  | 0.2382271 |
| A_51_P4982 | 4031.1  | Detected   | 2617.5  | Detected | 7147.4  | Detected   | 6466.3  | Detected   | Rnf141        | 1.604103098 | 1.77306442 | 2.4704107  | 2.7306208 |
| A_55_P2055 | 2693.1  | Detected   | 2175.6  | Detected | 2142.3  | Detected   | 4319.9  | Detected   | Maoa          | 1.604062233 | 0.79547733 | 1.98561316 | 0.9846939 |
| A_51_P4528 | 3286.7  | Detected   | 4454.4  | Detected | 4704.6  | Detected   | 5272    | Detected   | Rpl31         | 1.604040527 | 1.43140536 | 1.18354885 | 1.0561692 |
| A_52_P5320 | 344     | Detected   | 272     | Detected | 464.8   | Detected   | 551.7   | Detected   | Zfyve27       | 1.60377907  | 1.35116279 | 2.02830882 | 1.7088235 |
| A_55_P2066 | 2466.5  | Detected   | 2434.7  | Detected | 2205    | Detected   | 3955.5  | Detected   | Oacyl         | 1.603689438 | 0.89397932 | 1.62463548 | 0.9056557 |
| A_52_P7094 | 22.7    | Detected   | 17.9    | Detected | 18.1    | Detected   | 36.4    | Not Detect | Khdc1c        | 1.603524229 | 0.79735683 | 2.03351955 | 1.0111732 |
| A_55_P2097 | 112.2   | Detected   | 136.1   | Detected | 139     | Detected   | 179.9   | Detected   | Gm6713        | 1.603386809 | 1.23885918 | 1.32182219 | 1.0213079 |
| A_52_P5786 | 342.9   | Detected   | 1696.1  | Detected | 374.1   | Detected   | 549.8   | Detected   | Cela1         | 1.60338291  | 1.09098863 | 0.32415542 | 0.2205648 |
| A_55_P2145 | 4707.1  | Detected   | 6389.9  | Detected | 6782.3  | Detected   | 7546.9  | Detected   | Mpst          | 1.603301396 | 1.44086593 | 1.181067   | 1.0614094 |
| A_55_P1980 | 2069.7  | Detected   | 2569.3  | Detected | 2648.9  | Detected   | 3318    | Detected   | Apba3         | 1.603130889 | 1.27984732 | 1.29140233 | 1.0309812 |
| A_51_P3733 | 6.8     | Not Detect | 39.7    | Detected | 4       | Not Detect | 10.9    | Not Detect | Lce3c         | 1.602941176 | 0.58823529 | 0.27455919 | 0.1007557 |
| A_55_P2092 | 47.6    | Detected   | 89.1    | Detected | 79.2    | Detected   | 76.3    | Detected   | Nup210        | 1.602941176 | 1.66386555 | 0.85634119 | 0.8888889 |
| A_52_P2505 | 3001.6  | Detected   | 2108.6  | Detected | 3028.6  | Detected   | 4810.5  | Detected   | Dnajc13       | 1.602645256 | 1.0089952  | 2.28137153 | 1.4363085 |
| A_52_P5583 | 354     | Detected   | 519.6   | Detected | 257     | Detected   | 567.3   | Detected   | Zdhhc1        | 1.602542373 | 0.7259887  | 1.09180139 | 0.4946112 |
| A_55_P1962 | 55.6    | Detected   | 86.8    | Detected | 288.6   | Detected   | 89.1    | Detected   | Hba-a1        | 1.602517986 | 5.19064748 | 1.0264977  | 3.3248848 |
| A_52_P1770 | 1270.8  | Detected   | 1139.4  | Detected | 1791.7  | Detected   | 2036.3  | Detected   | Pts           | 1.602376456 | 1.40989928 | 1.78716869 | 1.5724943 |
| A_55_P2205 | 26.9    | Detected   | 24.1    | Detected | 17.4    | Detected   | 43.1    | Not Detect | D17H6S56E-5   | 1.602230483 | 0.64684015 | 1.78838174 | 0.7219917 |
| A_55_P2046 | 2655.8  | Detected   | 4569.3  | Detected | 1965.8  | Detected   | 4255.2  | Detected   | Mlkl          | 1.602229084 | 0.74019128 | 0.93125862 | 0.4302191 |
| A_66_P1333 | 20626.4 | Detected   | 23181.6 | Detected | 30327   | Detected   | 33047.7 | Detected   | Tpd52         | 1.602203972 | 1.4703002  | 1.42560048 | 1.3082358 |
| A_52_P3271 | 47.5    | Detected   | 55.2    | Detected | 67.6    | Detected   | 76.1    | Detected   | 0610008F07Rik | 1.602105263 | 1.42315789 | 1.37862319 | 1.2246377 |

|            |          |            |          |          |         |            |          |            |              |             |             |            |            |           |
|------------|----------|------------|----------|----------|---------|------------|----------|------------|--------------|-------------|-------------|------------|------------|-----------|
| A_51_P1058 | 19.6     | Detected   | 18.2     | Detected | 25.2    | Detected   | 31.4     | Not Detect | Col6a6       | 1.602040816 | 1.28571429  | 1.72527473 | 1.3846154  |           |
| A_55_P2158 | 1724.2   | Detected   | 1712.1   | Detected | 1806.2  | Detected   | 2762     | Detected   | Iqcc         | 1.601902332 | 1.04755829  | 1.61322353 | 1.0549617  |           |
| A_55_P2028 | 118.8    | Detected   | 111.6    | Detected | 68.3    | Detected   | 190.3    | Detected   | LOC100862497 | 1.601851852 | 0.57491582  | 1.70519713 | 0.6120072  |           |
| A_66_P1175 | 460.6    | Detected   | 929.5    | Detected | 259.8   | Detected   | 737.8    | Detected   | Mtmr7        | 1.601823708 | 0.5640469   | 0.79376009 | 0.2795051  |           |
| A_55_P1970 | 119812.3 | Detected   | 169273.2 | Detected | 162659  | Detected   | 191907.1 | Detected   | Mif          | 1.601731208 | 1.3576152   | 1.13371225 | 0.9609259  |           |
| A_55_P1953 | 4112.3   | Detected   | 3414.2   | Detected | 5146.5  | Detected   | 6586.5   | Detected   | Fam98c       | 1.601658439 | 1.25148943  | 1.92914885 | 1.5073809  |           |
| A_55_P1988 | 7024.7   | Detected   | 6107.7   | Detected | 6402.9  | Detected   | 11250.7  | Detected   | Cdkn2b       | 1.601591527 | 0.91148376  | 1.84205184 | 1.0483324  |           |
| A_52_P3154 | 563.7    | Detected   | 395.4    | Detected | 676.2   | Detected   | 902.8    | Detected   | Btg2         | 1.601561114 | 1.19957424  | 2.28325746 | 1.7101669  |           |
| A_55_P2002 | 507.9    | Detected   | 581.1    | Detected | 544     | Detected   | 813.4    | Detected   | Srebfl       | 1.601496358 | 1.07107698  | 1.39975908 | 0.9361556  |           |
| A_51_P1195 | 2793.4   | Detected   | 5281     | Detected | 3131.6  | Detected   | 4473.6   | Detected   | Aga          | 1.601489225 | 1.1210711   | 0.84711229 | 0.5929938  |           |
| A_52_P5390 | 30340.9  | Detected   | 31121.4  | Detected | 44339.2 | Detected   | 48590.2  | Detected   | Ccnd2        | 1.601475236 | 1.46136733  | 1.56131151 | 1.4247174  |           |
| A_55_P2083 | 16.3     | Detected   | 20.2     | Detected | 16.2    | Detected   | 26.1     | Not Detect | Gm10024      | 1.601226994 | 0.99386503  | 1.29207921 | 0.8019802  |           |
| A_52_P3814 | 210.6    | Detected   | 355.6    | Detected | 205.8   | Detected   | 337.2    | Detected   | Tbc1d4       | 1.601139601 | 0.97720798  | 0.94825647 | 0.5787402  |           |
| A_52_P4516 | 53.4     | Detected   | 58.3     | Detected | 59.2    | Detected   | 85.5     | Detected   | Ndn          | 1.601123596 | 1.10861423  | 1.46655232 | 1.0154374  |           |
| A_55_P2182 | 750.2    | Detected   | 624.3    | Detected | 1359.9  | Detected   | 1201.1   | Detected   | Kcnh4        | 1.601039723 | 1.81271661  | 1.92391478 | 2.1782797  |           |
| A_55_P2173 | 7590.9   | Detected   | 6919.8   | Detected | 12932.1 | Detected   | 12152.5  | Detected   | Isg20        | 1.600930061 | 1.70363198  | 1.75619238 | 1.8688546  |           |
| A_51_P3713 | 963.9    | Detected   | 1163.6   | Detected | 1466    | Detected   | 1543.1   | Detected   | Mpp5         | 1.600892209 | 1.52090466  | 1.326143   | 1.2598831  |           |
| A_55_P2145 | 578.2    | Detected   | 1039.9   | Detected | 513.2   | Detected   | 925.6    | Detected   | Krt80        | 1.600830163 | 0.88758215  | 0.89008559 | 0.493509   |           |
| A_55_P2024 | 1242.9   | Detected   | 1869.1   | Detected | 1231    | Detected   | 1989.6   | Detected   | Tbc1d4       | 1.600772387 | 0.99042562  | 1.06446953 | 0.6586057  |           |
| A_51_P3935 | 20734    | Detected   | 22885.5  | Detected | 27264.3 | Detected   | 33186.4  | Detected   | Atp6v1d      | 1.60057876  | 1.31495611  | 1.45010596 | 1.1913351  |           |
| A_52_P2782 | 166.2    | Detected   | 202.7    | Detected | 267.5   | Detected   | 266      | Detected   | Atxn3        | 1.600481348 | 1.60950662  | 1.31228416 | 1.3196843  |           |
| A_55_P2049 | 523.3    | Detected   | 850.3    | Detected | 905.9   | Detected   | 837.5    | Detected   | Cops7b       | 1.600420409 | 1.73112937  | 0.98494649 | 1.0653887  |           |
| A_55_P2091 | 2059.7   | Detected   | 1408.1   | Detected | 3378.9  | Detected   | 3296.3   | Detected   | Hrct1        | 1.600378696 | 1.64048162  | 2.3409559  | 2.3996165  |           |
| A_55_P2035 | 19925.2  | Detected   | 27289.7  | Detected | 18977.3 | Detected   | 31883.7  | Detected   | Tcf25        | 1.600169634 | 0.95242708  | 1.1683419  | 0.6954016  |           |
| A_52_P6828 | 264.1    | Detected   | 329.4    | Detected | 401.7   | Detected   | 422.6    | Detected   | Xk           | 1.600151458 | 1.52101477  | 1.28293868 | 1.21949    |           |
| A_55_P2067 | 11993.2  | Detected   | 15648.3  | Detected | 18190.3 | Detected   | 19190.6  | Detected   | Psg23        | 1.600123403 | 1.51671781  | 1.22636964 | 1.1624458  |           |
| A_55_P2077 | 10116.4  | Detected   | 6299.1   | Detected | 6955.5  | Detected   | 16186.7  | Detected   | Stxbp1       | 1.600045471 | 0.68754695  | 2.56968456 | 1.1042054  |           |
| A_55_P2076 | 5959.6   | Detected   | 9111.1   | Detected | 7216.6  | Detected   | 9535.4   | Detected   |              | 8-Mar       | 1.600006712 | 1.2109202  | 1.04656957 | 0.7920668 |
| A_55_P2030 | 97.4     | Detected   | 157.8    | Detected | 152.6   | Detected   | 155.8    | Detected   | Tm7sf3       | 1.599589322 | 1.56673511  | 0.98732573 | 0.9670469  |           |
| A_55_P2027 | 15333.6  | Detected   | 18945.1  | Detected | 14825.5 | Detected   | 24521.9  | Detected   | Golga7       | 1.599226535 | 0.96686362  | 1.29436635 | 0.7825506  |           |
| A_55_P2073 | 19096.5  | Detected   | 21788    | Detected | 25865.2 | Detected   | 30531.9  | Detected   | Hadhb        | 1.598821774 | 1.35444715  | 1.40131724 | 1.1871305  |           |
| A_55_P2250 | 687.2    | Detected   | 461.5    | Detected | 588     | Detected   | 1098.6   | Detected   | Taok3        | 1.598661234 | 0.8556461   | 2.38049837 | 1.2741062  |           |
| A_66_P1099 | 545.6    | Detected   | 596.3    | Detected | 985.1   | Detected   | 872.2    | Detected   | Mamdc4       | 1.598607038 | 1.80553519  | 1.46268657 | 1.6520208  |           |
| A_55_P2015 | 1674.2   | Detected   | 1897.2   | Detected | 1915.8  | Detected   | 2676.3   | Detected   | Gm10374      | 1.598554534 | 1.14430773  | 1.41065781 | 1.0098039  |           |
| A_55_P2094 | 246.8    | Detected   | 146.7    | Detected | 146.3   | Detected   | 394.5    | Detected   | Zfp523       | 1.598460292 | 0.59278768  | 2.68916155 | 0.9972733  |           |
| A_51_P3146 | 279.3    | Detected   | 555.1    | Detected | 221.2   | Detected   | 446.4    | Detected   | Glt28d2      | 1.598281418 | 0.79197995  | 0.80417943 | 0.3984868  |           |
| A_55_P2058 | 138.9    | Detected   | 161.7    | Detected | 82.7    | Detected   | 222      | Detected   | Pde4dip      | 1.598272138 | 0.59539237  | 1.3729128  | 0.5114409  |           |
| A_52_P3871 | 282.5    | Detected   | 300.4    | Detected | 239.3   | Detected   | 451.5    | Detected   | Zfp324       | 1.598230088 | 0.84707965  | 1.50299601 | 0.7966045  |           |
| A_51_P3540 | 8957.3   | Detected   | 8007.9   | Detected | 11146.1 | Detected   | 14313.1  | Detected   | Tmc6         | 1.597925714 | 1.24435935  | 1.78737247 | 1.391888   |           |
| A_55_P1999 | 9.2      | Not Detect | 21.2     | Detected | 5       | Not Detect | 14.7     | Not Detect | 150009C09Rik | 1.597826087 | 0.54347826  | 0.69339623 | 0.2358491  |           |

|            |         |            |         |            |         |            |         |            |               |             |            |            |           |
|------------|---------|------------|---------|------------|---------|------------|---------|------------|---------------|-------------|------------|------------|-----------|
| A_51_P3387 | 5275.1  | Detected   | 4131.2  | Detected   | 8376.6  | Detected   | 8427.3  | Detected   | Sdhaf1        | 1.597562132 | 1.58795094 | 2.03991576 | 2.0276433 |
| A_55_P2228 | 165.4   | Detected   | 110.4   | Detected   | 246.2   | Detected   | 264.2   | Detected   | LOC101055834  | 1.597339782 | 1.4885127  | 2.39311594 | 2.2300725 |
| A_52_P2279 | 21.1    | Detected   | 44.3    | Detected   | 22.9    | Detected   | 33.7    | Not Detect | Olf1036       | 1.597156398 | 1.08530806 | 0.76072235 | 0.51693   |
| A_51_P1151 | 2441.5  | Detected   | 2981.5  | Detected   | 2560.2  | Detected   | 3899.4  | Detected   | Scara3        | 1.59713291  | 1.04861765 | 1.30786517 | 0.8586953 |
| A_55_P2149 | 41.7    | Detected   | 43.9    | Detected   | 37.8    | Detected   | 66.6    | Detected   | Panct2        | 1.597122302 | 0.90647482 | 1.51708428 | 0.8610478 |
| A_66_P1020 | 5341.8  | Detected   | 7944.5  | Detected   | 7067.1  | Detected   | 8531.3  | Detected   | Zfp1          | 1.59708338  | 1.32298102 | 1.07386242 | 0.8895588 |
| A_51_P5182 | 3820.2  | Detected   | 3767.5  | Detected   | 7365.5  | Detected   | 6101    | Detected   | Fibp          | 1.597036804 | 1.92804042 | 1.61937624 | 1.95501   |
| A_55_P2121 | 1624.7  | Detected   | 1557.4  | Detected   | 1718.1  | Detected   | 2594.3  | Detected   | Bbs9          | 1.596787099 | 1.05748754 | 1.66578914 | 1.1031848 |
| A_51_P4590 | 268.2   | Detected   | 371.1   | Detected   | 377.6   | Detected   | 428.2   | Detected   | Ybey          | 1.596569724 | 1.40790455 | 1.15386688 | 1.0175155 |
| A_52_P5519 | 5.7     | Not Detect | 4.3     | Not Detect | 20.6    | Detected   | 9.1     | Not Detect | Ffar1         | 1.596491228 | 3.61403509 | 2.11627907 | 4.7906977 |
| A_55_P2063 | 5.7     | Not Detect | 45.1    | Detected   | 3.3     | Not Detect | 9.1     | Not Detect | Ank1          | 1.596491228 | 0.57894737 | 0.20177384 | 0.0731707 |
| A_55_P2074 | 330.5   | Detected   | 516.4   | Detected   | 415.1   | Detected   | 527.6   | Detected   | Ccdc122       | 1.596369138 | 1.25597579 | 1.02168861 | 0.8038342 |
| A_51_P2889 | 21.3    | Detected   | 19.9    | Detected   | 28.3    | Detected   | 34      | Not Detect | Olf391-ps     | 1.596244131 | 1.3286385  | 1.70854271 | 1.4221106 |
| A_51_P1650 | 5040.3  | Detected   | 4615.7  | Detected   | 6989.6  | Detected   | 8045.5  | Detected   | Gga2          | 1.596234351 | 1.38674285 | 1.74307256 | 1.5143099 |
| A_51_P3378 | 311.6   | Detected   | 325     | Detected   | 275.1   | Detected   | 497.3   | Detected   | Prrc1         | 1.595956354 | 0.88286264 | 1.53015385 | 0.8464615 |
| A_55_P2161 | 49      | Detected   | 41.7    | Detected   | 49.7    | Detected   | 78.2    | Detected   | Rgs6          | 1.595918367 | 1.01428571 | 1.87529976 | 1.1918465 |
| A_55_P2034 | 28.7    | Detected   | 27.8    | Detected   | 24.7    | Detected   | 45.8    | Not Detect | Il12rb1       | 1.595818815 | 0.86062718 | 1.64748201 | 0.8884892 |
| A_51_P3313 | 2924.1  | Detected   | 2965    | Detected   | 4538.8  | Detected   | 4665.8  | Detected   | Paip2b        | 1.595636264 | 1.5522041  | 1.57362563 | 1.5307926 |
| A_51_P2497 | 1620.9  | Detected   | 1541.5  | Detected   | 2353.1  | Detected   | 2585.6  | Detected   | Dusp28        | 1.595163181 | 1.45172435 | 1.67732728 | 1.5265002 |
| A_55_P2403 | 143     | Detected   | 88.3    | Detected   | 42.3    | Detected   | 228.1   | Detected   | AI451458      | 1.595104895 | 0.2958042  | 2.58323896 | 0.4790487 |
| A_55_P2042 | 1875.1  | Detected   | 3692.4  | Detected   | 732.4   | Detected   | 2990.8  | Detected   | Glrp1         | 1.595008266 | 0.3905925  | 0.80998808 | 0.1983534 |
| A_51_P3089 | 7327.9  | Detected   | 7391.9  | Detected   | 8327    | Detected   | 11686.2 | Detected   | Hmgcl         | 1.594754295 | 1.13634193 | 1.58094671 | 1.1265033 |
| A_52_P4550 | 4212.4  | Detected   | 4551.3  | Detected   | 4514.4  | Detected   | 6717.6  | Detected   | Eif3c         | 1.594720349 | 1.0716931  | 1.4759739  | 0.9918924 |
| A_55_P2094 | 471.3   | Detected   | 402.6   | Detected   | 488.8   | Detected   | 751.5   | Detected   | Lrch1         | 1.59452578  | 1.03713134 | 1.86661699 | 1.2141083 |
| A_51_P4827 | 42572.8 | Detected   | 44143.9 | Detected   | 42022.6 | Detected   | 67881.2 | Detected   | Dhcr24        | 1.594473467 | 0.98707626 | 1.53772548 | 0.9519458 |
| A_66_P1006 | 7534.8  | Detected   | 4192.9  | Detected   | 13179   | Detected   | 12014   | Detected   | Slc26a2       | 1.594468334 | 1.74908425 | 2.86531995 | 3.1431706 |
| A_55_P2001 | 10.6    | Not Detect | 53      | Detected   | 9.2     | Not Detect | 16.9    | Not Detect | Mmel1         | 1.594339623 | 0.86792453 | 0.31886792 | 0.1735849 |
| A_55_P2308 | 146.4   | Detected   | 152.8   | Detected   | 99.9    | Detected   | 233.4   | Detected   | Fam120c       | 1.594262295 | 0.68237705 | 1.52748691 | 0.6537958 |
| A_55_P2408 | 774.8   | Detected   | 384.5   | Detected   | 1464.7  | Detected   | 1235.2  | Detected   | Lgr4          | 1.594217863 | 1.89042334 | 3.21248375 | 3.8093628 |
| A_55_P2044 | 153     | Detected   | 158.9   | Detected   | 149.3   | Detected   | 243.9   | Detected   | Fhl3          | 1.594117647 | 0.97581699 | 1.53492763 | 0.9395846 |
| A_52_P5945 | 2888.2  | Detected   | 2726.7  | Detected   | 3969.2  | Detected   | 4604.1  | Detected   | Nprl2         | 1.594107056 | 1.37428156 | 1.68852459 | 1.455679  |
| A_51_P4780 | 440     | Detected   | 560.7   | Detected   | 1078    | Detected   | 701.4   | Detected   | Epb4.1i5      | 1.594090909 | 2.45       | 1.25093633 | 1.9225968 |
| A_51_P4324 | 44.8    | Detected   | 37      | Detected   | 107.9   | Detected   | 71.4    | Detected   | Ppp1r14a      | 1.59375     | 2.40848214 | 1.92972973 | 2.9162162 |
| A_55_P1974 | 16      | Detected   | 14.9    | Not Detect | 17.4    | Detected   | 25.5    | Not Detect | Pde1c         | 1.59375     | 1.0875     | 1.7114094  | 1.1677852 |
| A_55_P1960 | 32      | Detected   | 31.5    | Detected   | 36.2    | Detected   | 51      | Detected   | Fam47e        | 1.59375     | 1.13125    | 1.61904762 | 1.1492063 |
| A_52_P2448 | 43.8    | Detected   | 69.7    | Detected   | 75.3    | Detected   | 69.8    | Detected   | D630033O11Rik | 1.593607306 | 1.71917808 | 1.00143472 | 1.0803443 |
| A_55_P1994 | 785.3   | Detected   | 202.8   | Detected   | 513.1   | Detected   | 1251.2  | Detected   | Rab3il1       | 1.593276455 | 0.65338087 | 6.16962525 | 2.5300789 |
| A_55_P2114 | 20401.8 | Detected   | 24375.2 | Detected   | 28474.4 | Detected   | 32503.1 | Detected   | Mrpl24        | 1.593148644 | 1.39568077 | 1.33344957 | 1.1681709 |
| A_66_P1237 | 3500.3  | Detected   | 4191.4  | Detected   | 4888.4  | Detected   | 5575.7  | Detected   | Lars2         | 1.592920607 | 1.39656601 | 1.33027151 | 1.1662929 |
| A_55_P2070 | 11573.6 | Detected   | 7744.2  | Detected   | 17794   | Detected   | 18434.7 | Detected   | Lgals9        | 1.592823322 | 1.53746457 | 2.38045247 | 2.2977196 |

|            |         |            |         |            |         |            |          |            |               |             |            |            |           |
|------------|---------|------------|---------|------------|---------|------------|----------|------------|---------------|-------------|------------|------------|-----------|
| A_66_P1125 | 15188.5 | Detected   | 13652.4 | Detected   | 25640.3 | Detected   | 24191.3  | Detected   | Isg20         | 1.592737927 | 1.68813905 | 1.77194486 | 1.87808   |
| A_52_P5616 | 124.7   | Detected   | 314.5   | Detected   | 88.5    | Detected   | 198.6    | Detected   | Vwa1          | 1.592622294 | 0.70970329 | 0.63147854 | 0.281399  |
| A_52_P4635 | 5.4     | Not Detect | 16.1    | Detected   | 3.1     | Not Detect | 8.6      | Not Detect | Cd200r1       | 1.592592593 | 0.57407407 | 0.53416149 | 0.1925466 |
| A_55_P2051 | 96.2    | Detected   | 83.7    | Detected   | 77.7    | Detected   | 153.2    | Detected   | Ankrd61       | 1.592515593 | 0.80769231 | 1.83034648 | 0.9283154 |
| A_65_P1049 | 168.3   | Detected   | 132.1   | Detected   | 115.8   | Detected   | 268      | Detected   | Raph1         | 1.592394534 | 0.68805704 | 2.02876609 | 0.8766086 |
| A_51_P2279 | 13      | Not Detect | 9.4     | Not Detect | 21.9    | Detected   | 20.7     | Not Detect | Dynlrb2       | 1.592307692 | 1.68461538 | 2.20212766 | 2.3297872 |
| A_55_P2175 | 2673.2  | Detected   | 5084.8  | Detected   | 3991.4  | Detected   | 4256.5   | Detected   | Rangrf        | 1.592286398 | 1.49311686 | 0.83710274 | 0.784967  |
| A_52_P1673 | 315.6   | Detected   | 247.2   | Detected   | 465.8   | Detected   | 502.5    | Detected   | Tmem8         | 1.592205323 | 1.47591888 | 2.03276699 | 1.8843042 |
| A_55_P1982 | 6443.4  | Detected   | 7791.9  | Detected   | 8016    | Detected   | 10257.3  | Detected   | Hmgn5         | 1.591907999 | 1.24406369 | 1.3164055  | 1.0287606 |
| A_51_P1760 | 14.2    | Not Detect | 22.6    | Detected   | 23.3    | Detected   | 22.6     | Not Detect | Ffar2         | 1.591549296 | 1.64084507 | 1          | 1.0309735 |
| A_51_P3003 | 58.5    | Detected   | 67.5    | Detected   | 69.5    | Detected   | 93.1     | Detected   | 1700007K09Rik | 1.591452991 | 1.18803419 | 1.37925926 | 1.0296296 |
| A_55_P2092 | 399.3   | Detected   | 376.9   | Detected   | 396.6   | Detected   | 635.4    | Detected   | Camkmt        | 1.591284748 | 0.99323817 | 1.68585832 | 1.0522685 |
| A_66_P1248 | 1937.5  | Detected   | 2318.8  | Detected   | 1928.3  | Detected   | 3083     | Detected   | Ing1          | 1.591225806 | 0.99525161 | 1.32956702 | 0.8315939 |
| A_52_P2825 | 1720.5  | Detected   | 850.8   | Detected   | 1193.8  | Detected   | 2737.3   | Detected   | Kif21b        | 1.590990991 | 0.69386806 | 3.21732487 | 1.40315   |
| A_55_P2021 | 203.4   | Detected   | 141.3   | Detected   | 289.6   | Detected   | 323.6    | Detected   | Enpp5         | 1.590953786 | 1.42379548 | 2.29016277 | 2.04954   |
| A_51_P2073 | 19.3    | Detected   | 12.3    | Not Detect | 15.6    | Not Detect | 30.7     | Not Detect | 4930526D03Rik | 1.590673575 | 0.80829016 | 2.49593496 | 1.2682927 |
| A_55_P1955 | 21      | Detected   | 21.3    | Detected   | 29.5    | Detected   | 33.4     | Not Detect | Myo1g         | 1.59047619  | 1.4047619  | 1.56807512 | 1.3849765 |
| A_55_P2152 | 21      | Detected   | 23.5    | Detected   | 22.5    | Detected   | 33.4     | Not Detect | Ints10        | 1.59047619  | 1.07142857 | 1.4212766  | 0.9574468 |
| A_55_P1966 | 62972.3 | Detected   | 71323.4 | Detected   | 94154.4 | Detected   | 100154.4 | Detected   | Fdps          | 1.590451675 | 1.49517169 | 1.40422919 | 1.3201053 |
| A_51_P1961 | 6554.7  | Detected   | 10997   | Detected   | 7213    | Detected   | 10423.7  | Detected   | Papss1        | 1.590263475 | 1.10043175 | 0.9478676  | 0.6559062 |
| A_55_P1999 | 34.9    | Detected   | 34.2    | Detected   | 39.6    | Detected   | 55.5     | Detected   | Cyp2e1        | 1.59025788  | 1.13467049 | 1.62280702 | 1.1578947 |
| A_55_P2333 | 42.7    | Detected   | 44.6    | Detected   | 72.9    | Detected   | 67.9     | Detected   | BC020402      | 1.590163934 | 1.70725995 | 1.52242152 | 1.6345291 |
| A_52_P1341 | 2408.4  | Detected   | 1818.4  | Detected   | 3148.9  | Detected   | 3829.4   | Detected   | Pyurf         | 1.590018269 | 1.30746554 | 2.10591729 | 1.7316872 |
| A_55_P2186 | 226.1   | Detected   | 271.8   | Detected   | 262.5   | Detected   | 359.5    | Detected   | Pdik1l        | 1.590004423 | 1.16099071 | 1.32266372 | 0.9657837 |
| A_51_P1048 | 591.5   | Detected   | 645.4   | Detected   | 594.1   | Detected   | 940.4    | Detected   | Alkbh5        | 1.589856298 | 1.0043956  | 1.45708088 | 0.9205144 |
| A_55_P2127 | 21841.4 | Detected   | 25340.1 | Detected   | 26723.8 | Detected   | 34723.8  | Detected   | Kri1          | 1.589815671 | 1.22353878 | 1.3703103  | 1.0546052 |
| A_55_P2289 | 116.6   | Detected   | 175.5   | Detected   | 138.8   | Detected   | 185.3    | Detected   | B230308N11Rik | 1.589193825 | 1.19039451 | 1.05584046 | 0.7908832 |
| A_55_P2115 | 765.8   | Detected   | 718.5   | Detected   | 958.5   | Detected   | 1217     | Detected   | Parva         | 1.589187777 | 1.25163228 | 1.69380654 | 1.3340292 |
| A_52_P1382 | 902.8   | Detected   | 816     | Detected   | 956.9   | Detected   | 1434.7   | Detected   | Plekha8       | 1.589167036 | 1.05992468 | 1.75821078 | 1.1726716 |
| A_51_P4989 | 379.8   | Detected   | 445.5   | Detected   | 564.1   | Detected   | 603.5    | Detected   | Loh12cr1      | 1.588994207 | 1.4852554  | 1.35465769 | 1.2662177 |
| A_55_P1973 | 50.6    | Detected   | 67.7    | Detected   | 88.8    | Detected   | 80.4     | Detected   | Ksr1          | 1.588932806 | 1.75494071 | 1.18759232 | 1.3116691 |
| A_52_P6068 | 509.7   | Detected   | 586.8   | Detected   | 714.7   | Detected   | 809.6    | Detected   | Pigh          | 1.588385325 | 1.40219737 | 1.37968643 | 1.2179618 |
| A_51_P5020 | 11520.2 | Detected   | 14133.7 | Detected   | 15937.9 | Detected   | 18297.1  | Detected   | Gtf2b         | 1.588262357 | 1.38347425 | 1.29457255 | 1.1276523 |
| A_52_P6684 | 488.5   | Detected   | 621.1   | Detected   | 482     | Detected   | 775.8    | Detected   | Rhbdd2        | 1.588126919 | 0.98669396 | 1.24907422 | 0.7760425 |
| A_55_P2001 | 30.1    | Detected   | 27.6    | Detected   | 32.7    | Detected   | 47.8     | Detected   | Klhl3         | 1.588039867 | 1.08637874 | 1.73188406 | 1.1847826 |
| A_51_P3485 | 31474.6 | Detected   | 40727.7 | Detected   | 46703.7 | Detected   | 49982.3  | Detected   | Ecsit         | 1.588020181 | 1.48385365 | 1.2272311  | 1.1467306 |
| A_55_P2045 | 5276.7  | Detected   | 5517.9  | Detected   | 5007.1  | Detected   | 8378     | Detected   | Btnl10        | 1.587734758 | 0.94890746 | 1.51833125 | 0.9074286 |
| A_55_P2172 | 22.8    | Detected   | 22.7    | Detected   | 21.8    | Detected   | 36.2     | Not Detect | 1700061117Rik | 1.587719298 | 0.95614035 | 1.59471366 | 0.9603524 |
| A_52_P2505 | 393.9   | Detected   | 496.9   | Detected   | 436.2   | Detected   | 625.4    | Detected   | Dynll1        | 1.587712617 | 1.10738766 | 1.25860334 | 0.8778426 |
| A_51_P2692 | 43.4    | Detected   | 47.3    | Detected   | 48.5    | Detected   | 68.9     | Detected   | Acr           | 1.587557604 | 1.11751152 | 1.45665962 | 1.02537   |

|            |         |            |         |          |         |            |         |            |               |             |            |            |           |
|------------|---------|------------|---------|----------|---------|------------|---------|------------|---------------|-------------|------------|------------|-----------|
| A_52_P6743 | 3483.2  | Detected   | 3630.5  | Detected | 6466.4  | Detected   | 5529.1  | Detected   | Thtpa         | 1.587362196 | 1.85645384 | 1.52295827 | 1.7811321 |
| A_55_P1979 | 1504.7  | Detected   | 1641.4  | Detected | 2587.7  | Detected   | 2388.4  | Detected   | Abtb1         | 1.587293148 | 1.7197448  | 1.45509931 | 1.57652   |
| A_55_P2139 | 8958    | Detected   | 7547.4  | Detected | 16869.6 | Detected   | 14218.3 | Detected   | Gtf2a2        | 1.587218129 | 1.88318821 | 1.88386729 | 2.2351538 |
| A_52_P6395 | 2539.7  | Detected   | 2376.9  | Detected | 2980.8  | Detected   | 4031    | Detected   | Ate1          | 1.587195338 | 1.17368193 | 1.69590643 | 1.2540704 |
| A_55_P2057 | 2074.8  | Detected   | 3395.1  | Detected | 2208.1  | Detected   | 3293    | Detected   | Upk3bl        | 1.587140929 | 1.06424716 | 0.96992725 | 0.6503785 |
| A_51_P2964 | 11939.9 | Detected   | 12707.1 | Detected | 16059.6 | Detected   | 18949.1 | Detected   | Casp2         | 1.587040092 | 1.34503639 | 1.49122144 | 1.2638289 |
| A_55_P1997 | 12218.2 | Detected   | 9671.5  | Detected | 23080.2 | Detected   | 19388.9 | Detected   | Smim15        | 1.586886775 | 1.88900165 | 2.0047459  | 2.3864137 |
| A_55_P2171 | 1525.4  | Detected   | 1542.5  | Detected | 1705    | Detected   | 2420.5  | Detected   | Stx3          | 1.586796906 | 1.11773961 | 1.56920583 | 1.1053485 |
| A_51_P1160 | 14559.4 | Detected   | 14071   | Detected | 19310.5 | Detected   | 23102.7 | Detected   | Rexo2         | 1.586789291 | 1.32632526 | 1.64186625 | 1.3723616 |
| A_55_P2225 | 24.2    | Detected   | 28.5    | Detected | 18.5    | Detected   | 38.4    | Not Detect | A230092J17Rik | 1.58677686  | 0.76446281 | 1.34736842 | 0.6491228 |
| A_55_P2091 | 4028.2  | Detected   | 4007.4  | Detected | 3801.6  | Detected   | 6387    | Detected   | Krt222        | 1.585571719 | 0.94374659 | 1.59380147 | 0.948645  |
| A_52_P6126 | 2876.2  | Detected   | 3909.7  | Detected | 2467.1  | Detected   | 4559.1  | Detected   | Polb          | 1.585112301 | 0.85776372 | 1.1660997  | 0.6310203 |
| A_51_P4125 | 45.3    | Detected   | 49.4    | Detected | 59.5    | Detected   | 71.8    | Detected   | Irx4          | 1.584988962 | 1.31346578 | 1.4534413  | 1.2044534 |
| A_55_P2011 | 10.6    | Not Detect | 16.9    | Detected | 11      | Not Detect | 16.8    | Not Detect | Gpr111        | 1.58490566  | 1.03773585 | 0.99408284 | 0.6508876 |
| A_51_P3846 | 1243    | Detected   | 1290    | Detected | 1076.8  | Detected   | 1969.9  | Detected   | Dhdds         | 1.584794851 | 0.86629123 | 1.52705426 | 0.8347287 |
| A_52_P6580 | 6276.4  | Detected   | 5974.7  | Detected | 7737.7  | Detected   | 9946.1  | Detected   | Tspyl1        | 1.584682302 | 1.23282455 | 1.66470283 | 1.2950776 |
| A_55_P2134 | 24.8    | Detected   | 20.8    | Detected | 26.4    | Detected   | 39.3    | Not Detect | LOC101055680  | 1.584677419 | 1.06451613 | 1.88942308 | 1.2692308 |
| A_55_P2003 | 62.6    | Detected   | 78.5    | Detected | 133     | Detected   | 99.2    | Detected   | P4ha3         | 1.584664537 | 2.12460064 | 1.26369427 | 1.6942675 |
| A_52_P5287 | 49358.9 | Detected   | 55129.6 | Detected | 74738.4 | Detected   | 78216.7 | Detected   | Mrp63         | 1.584652413 | 1.51418285 | 1.41877866 | 1.3556855 |
| A_66_P1289 | 19.5    | Detected   | 17.3    | Detected | 19.6    | Detected   | 30.9    | Not Detect | Cyp2d9        | 1.584615385 | 1.00512821 | 1.78612717 | 1.132948  |
| A_55_P2180 | 2671.4  | Detected   | 2026.9  | Detected | 3582.8  | Detected   | 4232.8  | Detected   | Aldh3a2       | 1.584487535 | 1.34116942 | 2.0883122  | 1.7676254 |
| A_51_P2154 | 318.7   | Detected   | 2131    | Detected | 859.2   | Detected   | 504.9   | Detected   | Prodh         | 1.58424851  | 2.69595231 | 0.23693102 | 0.403191  |
| A_51_P2004 | 6770.8  | Detected   | 10558   | Detected | 8216.8  | Detected   | 10726   | Detected   | Hspa4         | 1.584155491 | 1.21356413 | 1.0159121  | 0.7782535 |
| A_51_P3172 | 3486.4  | Detected   | 4586.8  | Detected | 5399.8  | Detected   | 5522.9  | Detected   | Hpd1          | 1.584126893 | 1.54881827 | 1.20408564 | 1.1772478 |
| A_55_P2125 | 142.8   | Detected   | 160.8   | Detected | 130     | Detected   | 226.2   | Detected   | Tmem210       | 1.584033613 | 0.91036415 | 1.40671642 | 0.8084577 |
| A_55_P2106 | 119.2   | Detected   | 141.7   | Detected | 146.6   | Detected   | 188.8   | Detected   | Pcdha8        | 1.583892617 | 1.22986577 | 1.33239238 | 1.0345801 |
| A_51_P4677 | 2329.7  | Detected   | 2365.8  | Detected | 2769.6  | Detected   | 3689.8  | Detected   | Snx19         | 1.583809074 | 1.1888226  | 1.55964156 | 1.1706822 |
| A_55_P2177 | 124.6   | Detected   | 124.7   | Detected | 115.9   | Detected   | 197.3   | Detected   | Pde6g         | 1.583467095 | 0.93017657 | 1.58219727 | 0.9294306 |
| A_55_P1979 | 61.2    | Detected   | 58.4    | Detected | 66.7    | Detected   | 96.9    | Detected   | Hoxa9         | 1.583333333 | 1.08986928 | 1.65924658 | 1.1421233 |
| A_51_P5170 | 9603.1  | Detected   | 8673    | Detected | 11611.2 | Detected   | 15200.6 | Detected   | Tysnd1        | 1.582884693 | 1.20910956 | 1.75263461 | 1.3387755 |
| A_55_P1957 | 27.8    | Detected   | 67.2    | Detected | 55.5    | Detected   | 44      | Not Detect | Gm4567        | 1.582733813 | 1.99640288 | 0.6547619  | 0.8258929 |
| A_66_P1290 | 62      | Detected   | 64.4    | Detected | 83.6    | Detected   | 98.1    | Detected   | C2cd3         | 1.582258065 | 1.3483871  | 1.52329193 | 1.2981366 |
| A_51_P3165 | 1064.6  | Detected   | 1261.6  | Detected | 880.3   | Detected   | 1684.4  | Detected   | Irf2          | 1.582190494 | 0.82688334 | 1.33512999 | 0.6977647 |
| A_55_P2137 | 200.3   | Detected   | 180.2   | Detected | 273.7   | Detected   | 316.9   | Detected   | Kctd21        | 1.58212681  | 1.36645032 | 1.75860155 | 1.5188679 |
| A_52_P8391 | 498.4   | Detected   | 583.8   | Detected | 516.4   | Detected   | 788.5   | Detected   | Ssx2ip        | 1.5820626   | 1.03611557 | 1.35063378 | 0.8845495 |
| A_55_P2037 | 68.9    | Detected   | 77.1    | Detected | 85.6    | Detected   | 109     | Detected   | Ppp1r12b      | 1.582002903 | 1.24238026 | 1.41374838 | 1.1102464 |
| A_55_P1955 | 171     | Detected   | 140.2   | Detected | 241.9   | Detected   | 270.5   | Detected   | Synj1         | 1.581871345 | 1.41461988 | 1.92938659 | 1.7253923 |
| A_55_P2020 | 899     | Detected   | 1040.6  | Detected | 2507.9  | Detected   | 1422.1  | Detected   | Zfp239        | 1.581868743 | 2.78965517 | 1.36661541 | 2.4100519 |
| A_65_P0164 | 894.6   | Detected   | 809     | Detected | 837.6   | Detected   | 1415.1  | Detected   | Chd2          | 1.581824279 | 0.93628437 | 1.74919654 | 1.0353523 |
| A_55_P2120 | 967.6   | Detected   | 1021.1  | Detected | 1020.9  | Detected   | 1530.5  | Detected   | Wdtdc1        | 1.581748656 | 1.05508475 | 1.49887376 | 0.9998041 |

|            |          |            |          |          |          |            |          |            |               |             |            |            |           |
|------------|----------|------------|----------|----------|----------|------------|----------|------------|---------------|-------------|------------|------------|-----------|
| A_51_P1434 | 13208.5  | Detected   | 17820.9  | Detected | 14410.1  | Detected   | 20886.4  | Detected   | Timm44        | 1.581284779 | 1.09097172 | 1.17201713 | 0.8086067 |
| A_55_P2170 | 263      | Detected   | 193      | Detected | 83.2     | Detected   | 415.8    | Detected   | B930041F14Rik | 1.580988593 | 0.31634981 | 2.15440415 | 0.4310881 |
| A_51_P1553 | 8750.6   | Detected   | 9288.4   | Detected | 12080.6  | Detected   | 13833.7  | Detected   | Chmp2a        | 1.580885882 | 1.38054533 | 1.48935231 | 1.3006115 |
| A_55_P2034 | 2189.2   | Detected   | 2839.7   | Detected | 1944.6   | Detected   | 3460.8   | Detected   | Terf2         | 1.580851453 | 0.88826969 | 1.21872029 | 0.6847906 |
| A_51_P3799 | 5371.1   | Detected   | 4044.3   | Detected | 7681.4   | Detected   | 8490.4   | Detected   | Arl4a         | 1.58075627  | 1.43013535 | 2.0993497  | 1.8993151 |
| A_55_P2149 | 1821.2   | Detected   | 2716.3   | Detected | 1765.1   | Detected   | 2878.8   | Detected   | Rsrc1         | 1.580716011 | 0.96919613 | 1.05982403 | 0.6498178 |
| A_52_P4626 | 6.2      | Not Detect | 138.5    | Detected | 3.5      | Not Detect | 9.8      | Not Detect | Gm11545       | 1.580645161 | 0.56451613 | 0.07075812 | 0.0252708 |
| A_55_P1984 | 750.9    | Detected   | 819.1    | Detected | 812.7    | Detected   | 1186.8   | Detected   | Trim43c       | 1.580503396 | 1.08230124 | 1.44890734 | 0.9921865 |
| A_55_P1970 | 114.4    | Detected   | 136.7    | Detected | 281.6    | Detected   | 180.8    | Detected   | Cdk3-ps       | 1.58041958  | 2.46153846 | 1.32260424 | 2.0599854 |
| A_55_P2208 | 24399.4  | Detected   | 15360.4  | Detected | 39474.5  | Detected   | 38560.9  | Detected   | Onecut2       | 1.580403616 | 1.61784716 | 2.51040989 | 2.5698875 |
| A_51_P4530 | 4086.7   | Detected   | 6955.7   | Detected | 4022.5   | Detected   | 6458.6   | Detected   | Mphosph6      | 1.58039494  | 0.9842905  | 0.92853343 | 0.5783027 |
| A_55_P2139 | 434.2    | Detected   | 463.8    | Detected | 508.9    | Detected   | 686.2    | Detected   | Slc22a28      | 1.580377706 | 1.17204053 | 1.47951703 | 1.0972402 |
| A_55_P2102 | 19020.7  | Detected   | 15981.1  | Detected | 17017.9  | Detected   | 30056.4  | Detected   | Cc2d1b        | 1.580194209 | 0.89470419 | 1.88074663 | 1.0648766 |
| A_51_P1126 | 8854.5   | Detected   | 8332.1   | Detected | 15524.4  | Detected   | 13991.5  | Detected   | Mrpl50        | 1.580156982 | 1.75327799 | 1.67922853 | 1.8632038 |
| A_55_P2035 | 2260.1   | Detected   | 2471.2   | Detected | 2797.5   | Detected   | 3571.3   | Detected   | Zfp653        | 1.580151321 | 1.23777709 | 1.44516834 | 1.1320411 |
| A_52_P1554 | 60.7     | Detected   | 70.8     | Detected | 2149.7   | Compromis  | 95.9     | Detected   | Zfp317        | 1.579901153 | 35.4151565 | 1.35451977 | 30.362994 |
| A_55_P2110 | 44.5     | Detected   | 68.1     | Detected | 44.3     | Detected   | 70.3     | Detected   | Tmem91        | 1.579775281 | 0.99550562 | 1.03230543 | 0.650514  |
| A_55_P2330 | 109.4    | Detected   | 107.4    | Detected | 172.1    | Detected   | 172.8    | Detected   | AU019278      | 1.57952468  | 1.57312614 | 1.60893855 | 1.6024209 |
| A_52_P1555 | 18693.5  | Detected   | 13947.1  | Detected | 31224.9  | Detected   | 29523.3  | Detected   | Cdc42ep2      | 1.579335063 | 1.67036136 | 2.11680564 | 2.2388095 |
| A_51_P1353 | 14407.1  | Detected   | 16635.1  | Detected | 20079.8  | Detected   | 22750.3  | Detected   | Panx1         | 1.579103359 | 1.39374336 | 1.36760825 | 1.2070742 |
| A_55_P1980 | 361.6    | Detected   | 381.9    | Detected | 428.1    | Detected   | 570.8    | Detected   | Gm4312        | 1.578539823 | 1.18390487 | 1.4946321  | 1.1209741 |
| A_51_P5192 | 51529.1  | Detected   | 72772.5  | Detected | 60701.3  | Detected   | 81340.1  | Detected   | Ndufb7        | 1.578527473 | 1.17800039 | 1.11773129 | 0.8341242 |
| A_55_P2068 | 105639.3 | Detected   | 149248.1 | Detected | 140301.2 | Detected   | 166749.5 | Detected   | Mif           | 1.578479789 | 1.32811558 | 1.1172638  | 0.9400535 |
| A_55_P2019 | 19573.4  | Detected   | 24616.2  | Detected | 28437    | Detected   | 30889.1  | Detected   | Paox          | 1.578116219 | 1.45283906 | 1.25482812 | 1.1552149 |
| A_51_P4303 | 2778.6   | Detected   | 4221     | Detected | 3965.4   | Detected   | 4384.9   | Detected   | Gmpr2         | 1.578096883 | 1.42712157 | 1.03882966 | 0.9394456 |
| A_55_P2078 | 24.4     | Detected   | 32.2     | Detected | 38.5     | Detected   | 38.5     | Not Detect | Xk            | 1.577868852 | 1.57786885 | 1.19565217 | 1.1956522 |
| A_55_P1973 | 9        | Not Detect | 23.8     | Detected | 5.5      | Not Detect | 14.2     | Not Detect | Mmel1         | 1.577777778 | 0.61111111 | 0.59663866 | 0.2310924 |
| A_55_P1998 | 169.1    | Detected   | 325.9    | Detected | 209.2    | Detected   | 266.7    | Detected   | H2-M11        | 1.57717327  | 1.23713779 | 0.81834919 | 0.6419147 |
| A_52_P5773 | 17255.9  | Detected   | 15589.7  | Detected | 21455.7  | Detected   | 27212    | Detected   | Epdr1         | 1.576967878 | 1.24338342 | 1.74551146 | 1.3762741 |
| A_51_P4180 | 304.1    | Detected   | 304.6    | Detected | 244.4    | Detected   | 479.5    | Detected   | Ccnj          | 1.576783953 | 0.803683   | 1.57419567 | 0.8023638 |
| A_51_P1763 | 2857.4   | Detected   | 2459.3   | Detected | 3220.2   | Detected   | 4505.3   | Detected   | Usp25         | 1.576713096 | 1.12696857 | 1.83194405 | 1.309397  |
| A_51_P2781 | 2961.1   | Detected   | 2696.4   | Detected | 3803.8   | Detected   | 4668     | Detected   | Stampb        | 1.576441187 | 1.28459019 | 1.73119715 | 1.4106957 |
| A_55_P2419 | 283.4    | Detected   | 439.2    | Detected | 357.6    | Detected   | 446.7    | Detected   | 9330188P03Rik | 1.576217361 | 1.26182075 | 1.0170765  | 0.8142077 |
| A_55_P1966 | 21.7     | Detected   | 25.9     | Detected | 27.7     | Detected   | 34.2     | Not Detect | Gm6600        | 1.576036866 | 1.2764977  | 1.32046332 | 1.0694981 |
| A_55_P2001 | 6.6      | Not Detect | 27.6     | Detected | 9.5      | Not Detect | 10.4     | Not Detect | Rps4y2        | 1.575757576 | 1.43939394 | 0.37681159 | 0.3442029 |
| A_55_P2135 | 6097.8   | Detected   | 5980.7   | Detected | 6341.8   | Detected   | 9605.8   | Detected   | Hyi           | 1.575289449 | 1.04001443 | 1.60613306 | 1.0603775 |
| A_52_P1522 | 392.5    | Detected   | 456.1    | Detected | 319.9    | Detected   | 618.3    | Detected   | Rpgrip11      | 1.575286624 | 0.81503185 | 1.35562377 | 0.7013813 |
| A_55_P2336 | 9929.2   | Detected   | 10121.1  | Detected | 16602.3  | Detected   | 15638.7  | Detected   | Chn2          | 1.57502115  | 1.67206824 | 1.54515813 | 1.6403652 |
| A_52_P1773 | 13201.1  | Detected   | 16148.9  | Detected | 15147.7  | Detected   | 20791.9  | Detected   | Cox19         | 1.575012688 | 1.14745741 | 1.28751184 | 0.938002  |
| A_51_P4292 | 3595     | Detected   | 2582.5   | Detected | 3697.6   | Detected   | 5661.9   | Detected   | Tmod3         | 1.574937413 | 1.02853964 | 2.19241045 | 1.4317909 |

|            |         |            |         |            |         |            |          |            |               |             |            |            |           |
|------------|---------|------------|---------|------------|---------|------------|----------|------------|---------------|-------------|------------|------------|-----------|
| A_55_P2027 | 98066.9 | Detected   | 80884.7 | Detected   | 108946  | Detected   | 154445.1 | Detected   | Bri3          | 1.574895301 | 1.11093549 | 1.90944765 | 1.3469296 |
| A_55_P1974 | 20.7    | Detected   | 18.3    | Detected   | 31.7    | Detected   | 32.6     | Not Detect | Usp20         | 1.574879227 | 1.53140097 | 1.78142077 | 1.7322404 |
| A_52_P1378 | 659.2   | Detected   | 793.2   | Detected   | 599.4   | Detected   | 1038.1   | Detected   | Pdpr          | 1.574787621 | 0.90928398 | 1.30874937 | 0.7556732 |
| A_52_P3369 | 2852    | Detected   | 2962.9  | Detected   | 2764.1  | Detected   | 4491.2   | Detected   | 9430020K01Rik | 1.574754558 | 0.96917952 | 1.51581221 | 0.9329036 |
| A_66_P1104 | 17.4    | Detected   | 29.7    | Detected   | 25.7    | Detected   | 27.4     | Not Detect | Kif6          | 1.574712644 | 1.47701149 | 0.92255892 | 0.8653199 |
| A_52_P3919 | 2879.3  | Detected   | 3114.8  | Detected   | 4326.8  | Detected   | 4534     | Detected   | Nt5c2         | 1.574688292 | 1.50272636 | 1.45563118 | 1.3891101 |
| A_55_P2166 | 7907.5  | Detected   | 10741.1 | Detected   | 6982.1  | Detected   | 12451.2  | Detected   | Cnot1         | 1.574606386 | 0.88297186 | 1.15921088 | 0.6500358 |
| A_51_P4894 | 27.5    | Detected   | 24.7    | Detected   | 26.6    | Detected   | 43.3     | Not Detect | Cdo1          | 1.574545455 | 0.96727273 | 1.75303644 | 1.0769231 |
| A_55_P2157 | 24.2    | Detected   | 41.2    | Detected   | 54.6    | Detected   | 38.1     | Not Detect | Cdx1          | 1.574380165 | 2.25619835 | 0.92475728 | 1.3252427 |
| A_51_P4180 | 19766.4 | Detected   | 18632.8 | Detected   | 27614.6 | Detected   | 31119.4  | Detected   | Sc5d          | 1.574358507 | 1.39704751 | 1.67014083 | 1.4820424 |
| A_51_P1350 | 305.8   | Detected   | 359.8   | Detected   | 289.1   | Detected   | 481.4    | Detected   | Preb          | 1.574231524 | 0.94538914 | 1.33796554 | 0.8035019 |
| A_55_P1959 | 52.8    | Detected   | 277.9   | Detected   | 135.6   | Detected   | 83.1     | Detected   | Ins1          | 1.573863636 | 2.56818182 | 0.29902843 | 0.4879453 |
| A_66_P1044 | 539.5   | Detected   | 616.6   | Detected   | 563.9   | Detected   | 849      | Detected   | Cog6          | 1.573679333 | 1.04522706 | 1.37690561 | 0.9145313 |
| A_51_P1607 | 6.8     | Not Detect | 3.9     | Not Detect | 207.8   | Detected   | 10.7     | Not Detect | Alb           | 1.573529412 | 30.5588235 | 2.74358974 | 53.282051 |
| A_52_P4648 | 533.8   | Detected   | 289.1   | Detected   | 206.7   | Detected   | 839.9    | Detected   | Dlx1          | 1.573435744 | 0.38722368 | 2.90522311 | 0.7149775 |
| A_66_P1176 | 1222.7  | Detected   | 1813.7  | Detected   | 1133.4  | Detected   | 1923.7   | Detected   | Nfatc3        | 1.573321338 | 0.92696491 | 1.0606495  | 0.6249104 |
| A_55_P2042 | 4014.9  | Detected   | 4611.8  | Detected   | 5367.6  | Detected   | 6315.2   | Detected   | Nrtn          | 1.572940796 | 1.33691997 | 1.36935687 | 1.1638839 |
| A_55_P2067 | 34211.8 | Detected   | 42055.8 | Detected   | 54445.7 | Detected   | 53805.8  | Detected   | Atp5l         | 1.572726369 | 1.59143044 | 1.27939071 | 1.2946062 |
| A_66_P1342 | 25.5    | Detected   | 25.2    | Detected   | 30.3    | Detected   | 40.1     | Not Detect | Olf978        | 1.57254902  | 1.18823529 | 1.59126984 | 1.202381  |
| A_55_P2043 | 2471.6  | Detected   | 2192    | Detected   | 4405.2  | Detected   | 3886.5   | Detected   | Magef1        | 1.572463182 | 1.78232724 | 1.77303832 | 2.0096715 |
| A_55_P2088 | 2195.9  | Detected   | 1770.4  | Detected   | 2380.7  | Detected   | 3452.7   | Detected   | Ap3s2         | 1.57233936  | 1.08415684 | 1.95023723 | 1.3447244 |
| A_51_P1415 | 7966.1  | Detected   | 7975.6  | Detected   | 10122.8 | Detected   | 12524.6  | Detected   | Oat           | 1.572237356 | 1.27073474 | 1.57036461 | 1.2692211 |
| A_52_P4910 | 4302.5  | Detected   | 4066.5  | Detected   | 6115    | Detected   | 6763.4   | Detected   | Nek8          | 1.571969785 | 1.42126671 | 1.66319931 | 1.5037502 |
| A_55_P2185 | 1117.7  | Detected   | 1298.8  | Detected   | 1901.9  | Detected   | 1756.8   | Detected   | Bpnt1         | 1.571799231 | 1.7016194  | 1.3526332  | 1.4643517 |
| A_51_P3883 | 3342.1  | Detected   | 4867.3  | Detected   | 5186.1  | Detected   | 5252.2   | Detected   | Ppil4         | 1.571526884 | 1.5517489  | 1.07907875 | 1.0654983 |
| A_65_P1354 | 193.2   | Detected   | 108     | Detected   | 234.2   | Detected   | 303.6    | Detected   | Jup           | 1.571428571 | 1.21221532 | 2.81111111 | 2.1685185 |
| A_55_P1959 | 625.7   | Detected   | 863.3   | Detected   | 581.5   | Detected   | 983.1    | Detected   | Cth           | 1.571200256 | 0.92935912 | 1.13876984 | 0.6735781 |
| A_51_P4642 | 4733.5  | Detected   | 5130.3  | Detected   | 7541.3  | Detected   | 7437.1   | Detected   | Atf4          | 1.571162987 | 1.5931763  | 1.44964232 | 1.469953  |
| A_51_P1163 | 49.2    | Detected   | 50.3    | Detected   | 50      | Detected   | 77.3     | Detected   | P2rx3         | 1.571138211 | 1.01626016 | 1.53677932 | 0.9940358 |
| A_55_P2053 | 4844.1  | Detected   | 6611.1  | Detected   | 7528.7  | Detected   | 7610.7   | Detected   | Poli          | 1.571127764 | 1.55419995 | 1.15120025 | 1.1387969 |
| A_55_P1988 | 31108.5 | Detected   | 43787   | Detected   | 41846.6 | Detected   | 48875.4  | Detected   | Tpi1          | 1.571126862 | 1.34518218 | 1.11620801 | 0.9556855 |
| A_55_P2035 | 972.5   | Detected   | 996.4   | Detected   | 864.7   | Detected   | 1527.3   | Detected   | E330020D12Rik | 1.570488432 | 0.88915167 | 1.53281815 | 0.8678242 |
| A_55_P2018 | 32080.1 | Detected   | 51809.1 | Detected   | 36492.3 | Detected   | 50379.8  | Detected   | Gcsh          | 1.570437748 | 1.13753698 | 0.97241218 | 0.7043608 |
| A_55_P2401 | 98      | Detected   | 56.1    | Detected   | 90.5    | Detected   | 153.9    | Detected   | AU015680      | 1.570408163 | 0.92346939 | 2.74331551 | 1.6131907 |
| A_55_P2059 | 2332.1  | Detected   | 2461.2  | Detected   | 3341.9  | Detected   | 3662.2   | Detected   | Arl6          | 1.570344325 | 1.4330003  | 1.48797335 | 1.3578336 |
| A_55_P2003 | 9096.5  | Detected   | 8914.3  | Detected   | 14051.8 | Detected   | 14283.1  | Detected   | Ngrn          | 1.570175342 | 1.54474798 | 1.60226827 | 1.5763212 |
| A_52_P2449 | 10.7    | Not Detect | 23.9    | Detected   | 5       | Not Detect | 16.8     | Not Detect | Aicda         | 1.570093458 | 0.46728972 | 0.70292887 | 0.209205  |
| A_55_P1958 | 1702.3  | Detected   | 2103.6  | Detected   | 2892.8  | Detected   | 2671.8   | Detected   | Prepl         | 1.569523586 | 1.69934794 | 1.27010839 | 1.3751664 |
| A_51_P2653 | 81.3    | Detected   | 88.8    | Detected   | 103.8   | Detected   | 127.6    | Detected   | Ldb3          | 1.569495695 | 1.27675277 | 1.43693694 | 1.1689189 |
| A_51_P3988 | 2695.9  | Detected   | 6910.1  | Detected   | 2876.1  | Detected   | 4231.1   | Detected   | Ctns          | 1.569457324 | 1.06684224 | 0.61230662 | 0.4162168 |

|            |         |          |          |          |         |            |          |            |               |             |            |            |           |
|------------|---------|----------|----------|----------|---------|------------|----------|------------|---------------|-------------|------------|------------|-----------|
| A_52_P3741 | 199.4   | Detected | 261.9    | Detected | 279.4   | Detected   | 312.9    | Detected   | Kbtbd8        | 1.569207623 | 1.40120361 | 1.19473081 | 1.0668194 |
| A_55_P2077 | 23.2    | Detected | 21.9     | Detected | 14.3    | Not Detect | 36.4     | Not Detect | Phxr4         | 1.568965517 | 0.61637931 | 1.66210046 | 0.652968  |
| A_55_P2178 | 60.3    | Detected | 84.8     | Detected | 69.1    | Detected   | 94.6     | Detected   |               | 1.568822554 | 1.14593698 | 1.11556604 | 0.8148585 |
| A_55_P2016 | 21.8    | Detected | 20.8     | Detected | 48.3    | Detected   | 34.2     | Not Detect | Gpr31b        | 1.568807339 | 2.21559633 | 1.64423077 | 2.3221154 |
| A_51_P3409 | 6065.7  | Detected | 6042.7   | Detected | 7597.4  | Detected   | 9515.5   | Detected   | Selo          | 1.568738975 | 1.25251826 | 1.57470998 | 1.2572857 |
| A_55_P2212 | 164.1   | Detected | 157.8    | Detected | 153.8   | Detected   | 257.4    | Detected   | 2410087M07Rik | 1.568555759 | 0.93723339 | 1.63117871 | 0.9746515 |
| A_55_P2135 | 174.7   | Detected | 106.4    | Detected | 453.5   | Detected   | 274      | Detected   | Gm3363        | 1.568402977 | 2.59587865 | 2.57518797 | 4.262218  |
| A_52_P3519 | 312.3   | Detected | 305.6    | Detected | 374.9   | Detected   | 489.8    | Detected   | Ank3          | 1.568363753 | 1.20044829 | 1.60274869 | 1.226767  |
| A_55_P2071 | 796.5   | Detected | 659.1    | Detected | 919.1   | Detected   | 1249.2   | Detected   | Fam86         | 1.568361582 | 1.15392341 | 1.89531179 | 1.3944773 |
| A_51_P2109 | 5561.5  | Detected | 6433.4   | Detected | 9252.9  | Detected   | 8722.2   | Detected   | Tsta3         | 1.5683179   | 1.6637418  | 1.35576833 | 1.4382597 |
| A_55_P2143 | 146.1   | Detected | 173.8    | Detected | 155.5   | Detected   | 229.1    | Detected   | Syt11         | 1.568104038 | 1.06433949 | 1.31818182 | 0.8947066 |
| A_55_P2189 | 38.2    | Detected | 28       | Detected | 42.8    | Detected   | 59.9     | Detected   | 9030425P06Rik | 1.568062827 | 1.12041885 | 2.13928571 | 1.5285714 |
| A_55_P1971 | 2563.7  | Detected | 3140     | Detected | 3841.6  | Detected   | 4020     | Detected   | Hdac10        | 1.568046183 | 1.49845926 | 1.28025478 | 1.2234395 |
| A_55_P1958 | 51419.7 | Detected | 55008.6  | Detected | 62031.3 | Detected   | 80625.4  | Detected   | Higd1a        | 1.567986589 | 1.20637227 | 1.46568718 | 1.1276655 |
| A_51_P1049 | 64.1    | Detected | 103.2    | Detected | 60.2    | Detected   | 100.5    | Detected   | Klra5         | 1.567862715 | 0.93915757 | 0.97383721 | 0.5833333 |
| A_66_P1206 | 23.6    | Detected | 29.4     | Detected | 19.6    | Detected   | 37       | Not Detect | Vax2os        | 1.56779661  | 0.83050847 | 1.2585034  | 0.6666667 |
| A_55_P1984 | 31.9    | Detected | 32.2     | Detected | 29.4    | Detected   | 50       | Not Detect | Gfra3         | 1.567398119 | 0.92163009 | 1.55279503 | 0.9130435 |
| A_55_P2103 | 2688.7  | Detected | 5258.7   | Detected | 882     | Detected   | 4213.9   | Detected   | Isg15         | 1.56726299  | 0.32803957 | 0.80131972 | 0.1677221 |
| A_55_P2043 | 3449.3  | Detected | 5069.2   | Detected | 3241.6  | Detected   | 5405.5   | Detected   | Atmin         | 1.567129563 | 0.93978488 | 1.06634183 | 0.6394697 |
| A_55_P2155 | 723.5   | Detected | 1588.7   | Detected | 579.1   | Detected   | 1133.8   | Detected   | Lck           | 1.567104354 | 0.80041465 | 0.71366526 | 0.3645119 |
| A_55_P2021 | 6331.3  | Detected | 5344     | Detected | 8423.1  | Detected   | 9921.7   | Detected   | Abcb8         | 1.567087328 | 1.33039028 | 1.85660554 | 1.5761789 |
| A_51_P3128 | 81.3    | Detected | 20.5     | Detected | 174.9   | Detected   | 127.4    | Detected   | Pspn          | 1.56703567  | 2.15129151 | 6.21463415 | 8.5317073 |
| A_51_P4104 | 723.6   | Detected | 737.3    | Detected | 875.8   | Detected   | 1133.9   | Detected   | Tube1         | 1.567025981 | 1.2103372  | 1.53790859 | 1.1878476 |
| A_66_P1274 | 86.1    | Detected | 118.7    | Detected | 101.5   | Detected   | 134.9    | Detected   | Zbed4         | 1.566782811 | 1.17886179 | 1.13647852 | 0.8550969 |
| A_55_P1959 | 79.6    | Detected | 96       | Detected | 101.7   | Detected   | 124.7    | Detected   | Slc16a3       | 1.566582915 | 1.27763819 | 1.29895833 | 1.059375  |
| A_55_P2075 | 997.7   | Detected | 1599.1   | Detected | 1276.8  | Detected   | 1562.5   | Detected   | Ube2n         | 1.566102035 | 1.27974341 | 0.97711213 | 0.7984491 |
| A_52_P6207 | 3538.2  | Detected | 5698.1   | Detected | 4643.5  | Detected   | 5540.6   | Detected   | Eif2a         | 1.565937482 | 1.31239048 | 0.97235921 | 0.8149208 |
| A_55_P2185 | 38      | Detected | 48.5     | Detected | 28.2    | Detected   | 59.5     | Detected   | Wnk1          | 1.565789474 | 0.74210526 | 1.22680412 | 0.5814433 |
| A_52_P1225 | 154.8   | Detected | 193.1    | Detected | 192.5   | Detected   | 242.3    | Detected   | Rasgrp4       | 1.565245478 | 1.24354005 | 1.25479026 | 0.9968928 |
| A_51_P4267 | 82522.5 | Detected | 116122.6 | Detected | 82754.8 | Detected   | 129148.4 | Detected   | Anxa5         | 1.565008331 | 1.00281499 | 1.11217282 | 0.7126503 |
| A_52_P3284 | 3359.3  | Detected | 4066.1   | Detected | 2888.7  | Detected   | 5257.1   | Detected   | Cdk10         | 1.564939124 | 0.85991129 | 1.29290967 | 0.7104351 |
| A_52_P1639 | 1418.1  | Detected | 1203.3   | Detected | 1623.5  | Detected   | 2219.2   | Detected   | Cln6          | 1.564910796 | 1.14484169 | 1.84426161 | 1.3492063 |
| A_52_P2767 | 7520.3  | Detected | 7720.4   | Detected | 11612.3 | Detected   | 11766.7  | Detected   | Foxp1         | 1.564658325 | 1.54412723 | 1.52410497 | 1.504106  |
| A_51_P2224 | 13389.7 | Detected | 16249.4  | Detected | 17579.8 | Detected   | 20947.3  | Detected   | Ehbp111       | 1.564433856 | 1.31293457 | 1.28911221 | 1.0818738 |
| A_52_P1002 | 1074.1  | Detected | 1156.7   | Detected | 1049.2  | Detected   | 1680.1   | Detected   | Fasn          | 1.564193278 | 0.9768178  | 1.45249416 | 0.9070632 |
| A_66_P1174 | 427.4   | Detected | 423.1    | Detected | 995.4   | Detected   | 668.5    | Detected   | Pvrl3         | 1.564108563 | 2.32896584 | 1.58000473 | 2.3526353 |
| A_55_P1952 | 197.7   | Detected | 366.7    | Detected | 299     | Detected   | 309.2    | Detected   | AI854703      | 1.563985837 | 1.51239251 | 0.84319607 | 0.8153804 |
| A_51_P3674 | 22      | Detected | 32.4     | Detected | 34.2    | Detected   | 34.4     | Not Detect | Cldnd2        | 1.563636364 | 1.55454545 | 1.0617284  | 1.0555556 |
| A_51_P3422 | 8087.9  | Detected | 8313.1   | Detected | 8814.7  | Detected   | 12645    | Detected   | Setd6         | 1.56344663  | 1.08986263 | 1.52109321 | 1.0603385 |
| A_55_P2128 | 19059.1 | Detected | 29740.8  | Detected | 21113.2 | Detected   | 29797.4  | Detected   | LOC674321     | 1.563421148 | 1.10777529 | 1.00190311 | 0.7099069 |



|            |                  |                  |                  |                  |               |             |            |            |           |
|------------|------------------|------------------|------------------|------------------|---------------|-------------|------------|------------|-----------|
| A_55_P2068 | 628.7 Detected   | 767 Detected     | 531.2 Detected   | 982.9 Detected   | Pigv          | 1.563384762 | 0.84491808 | 1.28148631 | 0.6925684 |
| A_55_P2171 | 7.1 Not Detect   | 57 Detected      | 3.3 Not Detect   | 11.1 Not Detect  | Wipf1         | 1.563380282 | 0.46478873 | 0.19473684 | 0.0578947 |
| A_55_P2058 | 791.1 Detected   | 807.8 Detected   | 885.8 Detected   | 1236.7 Detected  | Pclo          | 1.563266338 | 1.11970674 | 1.53094825 | 1.0965586 |
| A_55_P2017 | 49 Detected      | 56.9 Detected    | 60.7 Detected    | 76.6 Detected    | Ezh1          | 1.563265306 | 1.23877551 | 1.34622144 | 1.0667838 |
| A_52_P4461 | 5253.6 Detected  | 6519.6 Detected  | 7783.2 Detected  | 8212.5 Detected  | Commd6        | 1.563213796 | 1.4814984  | 1.25966317 | 1.1938156 |
| A_55_P1977 | 1989.5 Detected  | 2546 Detected    | 2626 Detected    | 3109.9 Detected  | Apba3         | 1.563156572 | 1.31992963 | 1.22148468 | 1.0314218 |
| A_51_P3703 | 17062.1 Detected | 14352.2 Detected | 16786.5 Detected | 26662.3 Detected | Galnt2        | 1.562662275 | 0.98384724 | 1.85771519 | 1.1696116 |
| A_55_P2000 | 67.9 Detected    | 84.9 Detected    | 76.5 Detected    | 106.1 Detected   | Slc36a1       | 1.562592047 | 1.12665685 | 1.24970554 | 0.9010601 |
| A_55_P2136 | 10253.6 Detected | 10419.5 Detected | 9718.2 Detected  | 16020.5 Detected | Tmem128       | 1.562426855 | 0.94778419 | 1.53754979 | 0.9326935 |
| A_55_P1964 | 5310.3 Detected  | 10011.9 Detected | 7360.3 Detected  | 8296.5 Detected  | Rangrf        | 1.562341111 | 1.38604222 | 0.82866389 | 0.7351552 |
| A_55_P2024 | 1373.9 Detected  | 1274.3 Detected  | 1597.9 Detected  | 2146.5 Detected  | Vps33b        | 1.562340782 | 1.16303952 | 1.68445421 | 1.2539433 |
| A_52_P2405 | 766.2 Detected   | 909.9 Detected   | 901.2 Detected   | 1197 Detected    | Zfp317        | 1.562255286 | 1.17619421 | 1.31552918 | 0.9904385 |
| A_52_P5967 | 9721.3 Detected  | 11860.1 Detected | 16020.3 Detected | 15186 Detected   | Dnph1         | 1.562136751 | 1.64795861 | 1.28042765 | 1.3507728 |
| A_55_P1974 | 15856.8 Detected | 20272.3 Detected | 19280.2 Detected | 24769.8 Detected | Ndufb6        | 1.562093234 | 1.21589476 | 1.22185445 | 0.9510613 |
| A_52_P6747 | 1384.5 Detected  | 2741.8 Detected  | 1774.8 Detected  | 2162.6 Detected  | Btbd3         | 1.562007945 | 1.28190683 | 0.78875191 | 0.647312  |
| A_55_P1996 | 171.2 Detected   | 196.8 Detected   | 141.3 Detected   | 267.4 Detected   | Olf1443       | 1.561915888 | 0.82535047 | 1.35873984 | 0.7179878 |
| A_52_P1126 | 3150.4 Detected  | 2848.3 Detected  | 3248.8 Detected  | 4920.1 Detected  | Lman2         | 1.561738192 | 1.03123413 | 1.72738124 | 1.1406102 |
| A_55_P2256 | 73 Detected      | 78.4 Detected    | 93.8 Detected    | 114 Detected     | LOC100049077  | 1.561643836 | 1.28493151 | 1.45408163 | 1.1964286 |
| A_55_P2173 | 27.6 Detected    | 26.8 Detected    | 28.2 Detected    | 43.1 Not Detect  | Prdm15        | 1.561594203 | 1.02173913 | 1.60820896 | 1.0522388 |
| A_55_P2190 | 217.6 Detected   | 324.7 Detected   | 110.6 Detected   | 339.8 Detected   | 4921509J17Rik | 1.561580882 | 0.50827206 | 1.04650447 | 0.3406221 |
| A_51_P1788 | 230.3 Detected   | 229.4 Detected   | 257.5 Detected   | 359.6 Detected   | H1foo         | 1.561441598 | 1.11810682 | 1.56756757 | 1.1224935 |
| A_66_P1212 | 28.5 Detected    | 27.3 Detected    | 23.6 Detected    | 44.5 Not Detect  | Tceal6        | 1.561403509 | 0.82807018 | 1.63003663 | 0.8644689 |
| A_66_P1334 | 9.8 Not Detect   | 9.2 Not Detect   | 19.6 Detected    | 15.3 Not Detect  | 170002211Rik  | 1.56122449  | 2          | 1.66304348 | 2.1304348 |
| A_55_P2046 | 3282.9 Detected  | 5000.3 Detected  | 3483.1 Detected  | 5125.3 Detected  | Amfr          | 1.561211124 | 1.06098267 | 1.0249985  | 0.6965782 |
| A_52_P5825 | 743.7 Detected   | 1001.9 Detected  | 694.8 Detected   | 1160.8 Detected  | Rbm48         | 1.560844427 | 0.93424768 | 1.15859866 | 0.6934824 |
| A_51_P3911 | 1102.3 Detected  | 267.2 Detected   | 1891.9 Detected  | 1720.5 Detected  | Ang           | 1.560827361 | 1.71632042 | 6.43899701 | 7.0804641 |
| A_55_P2196 | 74 Detected      | 74 Detected      | 57.9 Detected    | 115.5 Detected   | Kcnq1ot1      | 1.560810811 | 0.78243243 | 1.56081081 | 0.7824324 |
| A_55_P2111 | 5846.4 Detected  | 5360.9 Detected  | 6032.5 Detected  | 9124.6 Detected  | Ppp1r2        | 1.560721128 | 1.03183155 | 1.70206495 | 1.1252775 |
| A_51_P3408 | 11020.2 Detected | 5100 Detected    | 20375.2 Detected | 17199.4 Detected | AA986860      | 1.560715776 | 1.84889566 | 3.37243137 | 3.9951373 |
| A_52_P2488 | 87.4 Detected    | 90.3 Detected    | 133.5 Detected   | 136.4 Detected   | Lmbr1         | 1.560640732 | 1.52745995 | 1.51052049 | 1.4784053 |
| A_55_P2171 | 744 Detected     | 804.3 Detected   | 833.1 Detected   | 1161.1 Detected  | Grm2          | 1.56061828  | 1.11975806 | 1.44361557 | 1.0358075 |
| A_55_P2006 | 2171.8 Detected  | 2186.1 Detected  | 2723.9 Detected  | 3388.7 Detected  | Ogdh          | 1.56031863  | 1.2542131  | 1.55011207 | 1.2460089 |
| A_55_P2067 | 1435.4 Detected  | 2380.6 Detected  | 2252.4 Detected  | 2239.6 Detected  | Phykpl        | 1.560261948 | 1.56917932 | 0.94077123 | 0.946148  |
| A_66_P1047 | 52.3 Detected    | 61.2 Detected    | 66.5 Detected    | 81.6 Detected    | Ermard        | 1.560229446 | 1.27151052 | 1.33333333 | 1.0866013 |
| A_51_P1291 | 5116.8 Detected  | 7157.9 Detected  | 5539.6 Detected  | 7983.3 Detected  | Gatad2a       | 1.560213415 | 1.08262977 | 1.11531315 | 0.7739141 |
| A_55_P2422 | 65.9 Detected    | 87.5 Detected    | 58.8 Detected    | 102.8 Detected   | C130021H21Rik | 1.559939302 | 0.892261   | 1.17485714 | 0.672     |
| A_55_P1976 | 331.4 Detected   | 340 Detected     | 485.1 Detected   | 516.8 Detected   | Nsdhl         | 1.55944478  | 1.46378998 | 1.52       | 1.4267647 |
| A_52_P3249 | 237.2 Detected   | 226 Detected     | 291.8 Detected   | 369.9 Detected   | Srprb         | 1.559443508 | 1.2301855  | 1.63672566 | 1.2911504 |
| A_51_P4064 | 1762.6 Detected  | 2128.6 Detected  | 2285.2 Detected  | 2748.6 Detected  | Pdk1          | 1.559400885 | 1.29649382 | 1.29127126 | 1.0735695 |
| A_52_P4363 | 896 Detected     | 1367 Detected    | 1564.6 Detected  | 1397.2 Detected  | Rps25         | 1.559375    | 1.74620536 | 1.02209217 | 1.1445501 |

|            |         |            |         |            |         |            |         |            |               |             |            |            |           |
|------------|---------|------------|---------|------------|---------|------------|---------|------------|---------------|-------------|------------|------------|-----------|
| A_52_P2731 | 1485.8  | Detected   | 1577.7  | Detected   | 1677.9  | Detected   | 2316.7  | Detected   | Sh3d19        | 1.559227352 | 1.12929062 | 1.46840337 | 1.0635102 |
| A_55_P1957 | 1567.7  | Detected   | 1371.6  | Detected   | 2465.5  | Detected   | 2444.3  | Detected   | Asap2         | 1.559163105 | 1.5726861  | 1.78207932 | 1.7975357 |
| A_55_P1994 | 394.6   | Detected   | 405.9   | Detected   | 709.5   | Detected   | 615.2   | Detected   | Mamdc4        | 1.559047136 | 1.79802331 | 1.51564425 | 1.7479675 |
| A_51_P3639 | 541.1   | Detected   | 489.8   | Detected   | 126.7   | Detected   | 843.6   | Detected   | Cdkn1a        | 1.559046387 | 0.23415265 | 1.72233565 | 0.258677  |
| A_52_P9862 | 584.3   | Detected   | 545.1   | Detected   | 767.6   | Detected   | 910.9   | Detected   | Sowahc        | 1.558959439 | 1.31370871 | 1.67106953 | 1.408182  |
| A_51_P2849 | 3051.2  | Detected   | 4550.3  | Detected   | 4053.7  | Detected   | 4756.6  | Detected   | Nrbf2         | 1.558927635 | 1.32855926 | 1.04533767 | 0.8908643 |
| A_55_P2062 | 43.3    | Detected   | 76.6    | Detected   | 50.4    | Detected   | 67.5    | Detected   | C1qtnf3       | 1.558891455 | 1.16397229 | 0.88120104 | 0.6579634 |
| A_52_P1184 | 2086.9  | Detected   | 2734.8  | Detected   | 2155    | Detected   | 3252.7  | Detected   | Ipmk          | 1.558627629 | 1.03263213 | 1.18937399 | 0.7879918 |
| A_51_P1810 | 2264.2  | Detected   | 3041.2  | Detected   | 3032.9  | Detected   | 3528.2  | Detected   | Ccdc132       | 1.558254571 | 1.33950181 | 1.16013416 | 0.9972708 |
| A_55_P2051 | 3355.7  | Detected   | 2500.3  | Detected   | 2756.4  | Detected   | 5228.2  | Detected   | Golgb1        | 1.558005781 | 0.82140835 | 2.09102908 | 1.1024277 |
| A_51_P2488 | 5773.4  | Detected   | 4466.9  | Detected   | 4662.9  | Detected   | 8994.5  | Detected   | Foxf2         | 1.557920809 | 0.80765234 | 2.01358884 | 1.0438783 |
| A_66_P1033 | 791.2   | Detected   | 803.9   | Detected   | 660     | Detected   | 1232.5  | Detected   | Dicer1        | 1.557760364 | 0.83417594 | 1.53315089 | 0.8209976 |
| A_55_P2125 | 2450.9  | Detected   | 3313.8  | Detected   | 2236.2  | Detected   | 3816.8  | Detected   | Lrrc8e        | 1.55730548  | 0.91239953 | 1.15178949 | 0.6748144 |
| A_51_P4809 | 1708.6  | Detected   | 1621.8  | Detected   | 1795.7  | Detected   | 2660.7  | Detected   | Zfyve16       | 1.557239845 | 1.05097741 | 1.64058454 | 1.1072265 |
| A_66_P1274 | 689.2   | Detected   | 597     | Detected   | 744.5   | Detected   | 1073.2  | Detected   | Acat2         | 1.557167731 | 1.08023796 | 1.79765494 | 1.2470687 |
| A_55_P1972 | 282.7   | Detected   | 284.1   | Detected   | 260.3   | Detected   | 440.2   | Detected   | Sh3bp1        | 1.557127697 | 0.92076406 | 1.54945442 | 0.9162267 |
| A_52_P2076 | 2100.8  | Detected   | 3538.9  | Detected   | 2178.8  | Detected   | 3271    | Detected   | Csnk2a2       | 1.557025895 | 1.03712871 | 0.92429851 | 0.6156715 |
| A_55_P2182 | 203.5   | Detected   | 296.3   | Detected   | 263.4   | Detected   | 316.8   | Detected   | Adat1         | 1.556756757 | 1.29434889 | 1.06918664 | 0.8889639 |
| A_51_P4546 | 1972.9  | Detected   | 2318    | Detected   | 2353.7  | Detected   | 3071.3  | Detected   | 4930430F08Rik | 1.55674388  | 1.19301536 | 1.32497843 | 1.0154012 |
| A_52_P3208 | 892     | Detected   | 1174.2  | Detected   | 1398.8  | Detected   | 1388.6  | Detected   | Crbn          | 1.556726457 | 1.56816143 | 1.1825924  | 1.1912792 |
| A_55_P1978 | 9.7     | Not Detect | 9.1     | Not Detect | 19.3    | Detected   | 15.1    | Not Detect | C2cd4c        | 1.556701031 | 1.98969072 | 1.65934066 | 2.1208791 |
| A_55_P2133 | 3407.6  | Detected   | 3538.8  | Detected   | 4664.2  | Detected   | 5304    | Detected   | Arhgef39      | 1.556520718 | 1.36876394 | 1.49881316 | 1.3180174 |
| A_51_P3310 | 3789.5  | Detected   | 3637.9  | Detected   | 4472.6  | Detected   | 5897.9  | Detected   | Ttc32         | 1.55637947  | 1.18026125 | 1.62123753 | 1.2294456 |
| A_55_P2085 | 14375.9 | Detected   | 15375.8 | Detected   | 19376.1 | Detected   | 22372.8 | Detected   | Lamtor2       | 1.55627126  | 1.34781822 | 1.45506575 | 1.2601686 |
| A_51_P1604 | 2234.5  | Detected   | 1785.4  | Detected   | 1510.1  | Detected   | 3477.1  | Detected   | Crybg3        | 1.556097561 | 0.67581114 | 1.94751876 | 0.8458049 |
| A_51_P2416 | 1020.2  | Detected   | 806.7   | Detected   | 1115.6  | Detected   | 1587.5  | Detected   | Prkdc         | 1.556067438 | 1.09351108 | 1.96789389 | 1.3829181 |
| A_55_P1965 | 553     | Detected   | 667.5   | Detected   | 953.1   | Detected   | 860.5   | Detected   | Rap1gap2      | 1.556057866 | 1.72350814 | 1.28913858 | 1.4278652 |
| A_55_P2129 | 137.5   | Detected   | 182.8   | Detected   | 153.4   | Detected   | 213.9   | Detected   | Zbtb44        | 1.555636364 | 1.11563636 | 1.17013129 | 0.8391685 |
| A_55_P2065 | 1724.9  | Detected   | 2141    | Detected   | 1320.8  | Detected   | 2683.3  | Detected   | Myo9b         | 1.555626413 | 0.76572555 | 1.25329285 | 0.616908  |
| A_66_P1083 | 657     | Detected   | 1831    | Detected   | 791.6   | Detected   | 1021.8  | Detected   | Sgcb          | 1.555251142 | 1.20487062 | 0.55805571 | 0.4323321 |
| A_55_P2175 | 214.9   | Detected   | 134.5   | Detected   | 246.3   | Detected   | 334.2   | Detected   | Gm2379        | 1.555141926 | 1.14611447 | 2.48475836 | 1.8312268 |
| A_51_P3962 | 1044.8  | Detected   | 1218.5  | Detected   | 858.6   | Detected   | 1624.8  | Detected   | Hsd1l         | 1.555130168 | 0.82178407 | 1.33344276 | 0.7046368 |
| A_55_P2343 | 20      | Detected   | 16.6    | Not Detect | 18.9    | Detected   | 31.1    | Not Detect | F930015N05Rik | 1.555       | 0.945      | 1.87349398 | 1.1385542 |
| A_52_P1549 | 1024    | Detected   | 1008.8  | Detected   | 2185.8  | Detected   | 1592.2  | Detected   | Pvrl3         | 1.554882813 | 2.13457031 | 1.57831086 | 2.1667328 |
| A_51_P3950 | 16.4    | Detected   | 14.6    | Not Detect | 15.6    | Not Detect | 25.5    | Not Detect | Wdtdc1        | 1.554878049 | 0.95121951 | 1.74657534 | 1.0684932 |
| A_55_P2262 | 543.3   | Detected   | 1033.9  | Detected   | 475.7   | Detected   | 844.7   | Detected   | 5430434G16Rik | 1.554757961 | 0.87557519 | 0.81700358 | 0.4601025 |
| A_55_P1979 | 89.6    | Detected   | 88.3    | Detected   | 91.7    | Detected   | 139.3   | Detected   | Tbata         | 1.5546875   | 1.0234375  | 1.57757644 | 1.0385051 |
| A_55_P2004 | 17794.8 | Detected   | 16871.9 | Detected   | 16421.8 | Detected   | 27664.6 | Detected   | Hexim2        | 1.554645177 | 0.92284263 | 1.63968492 | 0.9733225 |
| A_52_P5813 | 620.8   | Detected   | 560.2   | Detected   | 510.3   | Detected   | 965.1   | Detected   | Kif1c         | 1.554606959 | 0.82200387 | 1.72277758 | 0.9109247 |
| A_51_P3574 | 6722.7  | Detected   | 7431.5  | Detected   | 5862.6  | Detected   | 10450.1 | Detected   | Coprs         | 1.554449849 | 0.87206033 | 1.40618987 | 0.7888852 |

|            |                  |                  |                  |                  |               |             |            |            |           |
|------------|------------------|------------------|------------------|------------------|---------------|-------------|------------|------------|-----------|
| A_51_P1135 | 7.4 Not Detect   | 15.8 Not Detect  | 51.6 Detected    | 11.5 Not Detect  | Oit1          | 1.554054054 | 6.97297297 | 0.7278481  | 3.2658228 |
| A_55_P2005 | 599.8 Detected   | 1549.4 Detected  | 19.1 Detected    | 932 Detected     | Zfp422        | 1.553851284 | 0.03184395 | 0.60152317 | 0.0123274 |
| A_55_P1994 | 6.5 Not Detect   | 32 Detected      | 3.6 Not Detect   | 10.1 Not Detect  | Klhl23        | 1.553846154 | 0.55384615 | 0.315625   | 0.1125    |
| A_55_P2073 | 34.5 Detected    | 33.4 Detected    | 33.6 Detected    | 53.6 Detected    | Slc27a5       | 1.553623188 | 0.97391304 | 1.60479042 | 1.005988  |
| A_51_P3453 | 2237.3 Detected  | 3689 Detected    | 2303 Detected    | 3475.8 Detected  | Upk3bl        | 1.553569034 | 1.02936575 | 0.94220656 | 0.6242884 |
| A_55_P2028 | 3587 Detected    | 3187.7 Detected  | 4318.2 Detected  | 5572 Detected    | Kdm4b         | 1.553387232 | 1.20384723 | 1.74796875 | 1.3546444 |
| A_66_P1371 | 14269.2 Detected | 16438.1 Detected | 16773 Detected   | 22163.3 Detected | Zbtb8os       | 1.55322653  | 1.17546884 | 1.34828843 | 1.0203734 |
| A_52_P3031 | 22291.6 Detected | 22054.4 Detected | 28785.8 Detected | 34622.4 Detected | 1810037117Rik | 1.553159037 | 1.29132947 | 1.56986361 | 1.305218  |
| A_52_P2974 | 1484.8 Detected  | 1432.9 Detected  | 1675.1 Detected  | 2306.1 Detected  | 0610030E20Rik | 1.55313847  | 1.12816541 | 1.60939354 | 1.1690278 |
| A_51_P3360 | 51.2 Detected    | 86.6 Detected    | 42.1 Detected    | 79.5 Detected    | Lcat          | 1.552734375 | 0.82226563 | 0.91801386 | 0.4861432 |
| A_55_P2090 | 346.4 Detected   | 420.6 Detected   | 432 Detected     | 537.8 Detected   | Nat9          | 1.552540416 | 1.24711316 | 1.27864955 | 1.0271041 |
| A_55_P2019 | 170.7 Detected   | 293.9 Detected   | 248.2 Detected   | 265 Detected     | Apol7b        | 1.552431166 | 1.45401289 | 0.90166723 | 0.8445049 |
| A_51_P5179 | 24.8 Detected    | 17.4 Not Detect  | 21.4 Detected    | 38.5 Not Detect  | Tpcn2         | 1.552419355 | 0.86290323 | 2.21264368 | 1.2298851 |
| A_51_P3496 | 5238.7 Detected  | 5306.8 Detected  | 5813.3 Detected  | 8131.7 Detected  | Ano10         | 1.552236242 | 1.1096837  | 1.53231703 | 1.0954436 |
| A_52_P1957 | 391.9 Detected   | 442.3 Detected   | 488.7 Detected   | 608.3 Detected   | Atp5s         | 1.552181679 | 1.24700179 | 1.37531087 | 1.1049062 |
| A_51_P4087 | 288.2 Detected   | 383.7 Detected   | 285.5 Detected   | 447.3 Detected   | 4933439C10Rik | 1.552047189 | 0.99063151 | 1.1657545  | 0.7440709 |
| A_51_P3887 | 1675.5 Detected  | 1843.5 Detected  | 2049.7 Detected  | 2600.3 Detected  | Slc11a2       | 1.55195464  | 1.22333632 | 1.41052346 | 1.1118525 |
| A_55_P2143 | 49.3 Detected    | 81.1 Detected    | 109.1 Detected   | 76.5 Detected    | Rasgrp2       | 1.551724138 | 2.21298174 | 0.9432799  | 1.3452528 |
| A_52_P5047 | 1030 Detected    | 1027 Detected    | 1040.1 Detected  | 1597.8 Detected  | Rnf123        | 1.551262136 | 1.00980583 | 1.55579357 | 1.0127556 |
| A_51_P4531 | 5267.3 Detected  | 4255.7 Detected  | 4987.9 Detected  | 8170.5 Detected  | Hexb          | 1.551174226 | 0.94695575 | 1.91989567 | 1.1720516 |
| A_55_P2126 | 836.8 Detected   | 952.6 Detected   | 957.2 Detected   | 1297.7 Detected  | 1700066B19Rik | 1.550788719 | 1.14388145 | 1.36227168 | 1.0048289 |
| A_55_P1969 | 20228.9 Detected | 24836.7 Detected | 29475.3 Detected | 31367.6 Detected | Paox          | 1.550633005 | 1.45708862 | 1.26295361 | 1.1867639 |
| A_55_P1996 | 51.4 Detected    | 55.9 Detected    | 46.9 Detected    | 79.7 Detected    | 5730422E09Rik | 1.550583658 | 0.91245136 | 1.42576029 | 0.8389982 |
| A_55_P2098 | 51.4 Detected    | 66.7 Detected    | 52.5 Detected    | 79.7 Detected    | Asic5         | 1.550583658 | 1.02140078 | 1.19490255 | 0.7871064 |
| A_55_P2022 | 6267.8 Detected  | 7116 Detected    | 5853 Detected    | 9717.8 Detected  | Elovl1        | 1.550432369 | 0.93382048 | 1.36562676 | 0.8225126 |
| A_55_P2045 | 1312.7 Detected  | 1707.9 Detected  | 1134.5 Detected  | 2035.2 Detected  | Hmgxb4        | 1.550392321 | 0.86424926 | 1.19163885 | 0.6642661 |
| A_52_P2745 | 2902.5 Detected  | 2588.7 Detected  | 3606 Detected    | 4499.4 Detected  | Snx14         | 1.550180879 | 1.24237726 | 1.73809248 | 1.3929772 |
| A_51_P2103 | 659.7 Detected   | 602.1 Detected   | 1005 Detected    | 1022.6 Detected  | 2610306M01Rik | 1.55009853  | 1.52341974 | 1.69838897 | 1.6691579 |
| A_55_P2022 | 1136.8 Detected  | 1037.7 Detected  | 1869.8 Detected  | 1762.1 Detected  | Ptrh2         | 1.55005278  | 1.6447924  | 1.6980823  | 1.8018695 |
| A_66_P1295 | 704.3 Detected   | 809 Detected     | 919.1 Detected   | 1091.7 Detected  | Hyls1         | 1.550049695 | 1.30498367 | 1.34944376 | 1.1360939 |
| A_51_P4137 | 8963.9 Detected  | 10780.3 Detected | 9191.6 Detected  | 13893.5 Detected | Ap3d1         | 1.549939201 | 1.02540189 | 1.28878603 | 0.8526293 |
| A_55_P2177 | 100.2 Detected   | 131.3 Detected   | 69.3 Detected    | 155.3 Detected   | Dact3         | 1.5499002   | 0.69161677 | 1.18278751 | 0.5277989 |
| A_55_P1971 | 41.1 Detected    | 45.4 Detected    | 27.3 Detected    | 63.7 Detected    | Atp2b2        | 1.549878345 | 0.66423358 | 1.4030837  | 0.6013216 |
| A_55_P1988 | 36584.5 Detected | 36275.8 Detected | 35304.4 Detected | 56699.9 Detected | BC053749      | 1.549833946 | 0.96500977 | 1.56302273 | 0.9732218 |
| A_51_P2083 | 16554.6 Detected | 12250.8 Detected | 26509.5 Detected | 25650.8 Detected | Ak3           | 1.549466614 | 1.60133739 | 2.09380612 | 2.1638995 |
| A_55_P2084 | 623.9 Detected   | 638.5 Detected   | 559.2 Detected   | 966.7 Detected   | Pdik1l        | 1.549447027 | 0.89629748 | 1.51401723 | 0.8758027 |
| A_55_P2124 | 1314.3 Detected  | 1193.6 Detected  | 1277.8 Detected  | 2036.4 Detected  | Invs          | 1.549417941 | 0.97222856 | 1.7060992  | 1.0705429 |
| A_55_P1969 | 2294.5 Detected  | 2320.9 Detected  | 2431.9 Detected  | 3555 Detected    | Tbx3          | 1.549357158 | 1.05988233 | 1.53173338 | 1.0478263 |
| A_66_P1289 | 103.4 Detected   | 153.9 Detected   | 148.3 Detected   | 160.2 Detected   | Mipep         | 1.549323017 | 1.43423598 | 1.04093567 | 0.9636127 |
| A_55_P2000 | 301.1 Detected   | 324.8 Detected   | 333.9 Detected   | 466.5 Detected   | Gabarap       | 1.549319163 | 1.10893391 | 1.43626847 | 1.0280172 |

|            |         |          |         |          |         |          |          |            |               |             |            |            |           |
|------------|---------|----------|---------|----------|---------|----------|----------|------------|---------------|-------------|------------|------------|-----------|
| A_55_P2146 | 138.8   | Detected | 118.3   | Detected | 89.5    | Detected | 215      | Detected   | Trim7         | 1.548991354 | 0.64481268 | 1.81741336 | 0.7565511 |
| A_51_P3424 | 8517.3  | Detected | 6953.6  | Detected | 12073.6 | Detected | 13192.7  | Detected   | Gpd2          | 1.548929825 | 1.41753842 | 1.89724747 | 1.7363092 |
| A_55_P2056 | 4569.9  | Detected | 6503.9  | Detected | 5988.1  | Detected | 7078.1   | Detected   | Flad1         | 1.548852272 | 1.31033502 | 1.08828549 | 0.9206937 |
| A_55_P1970 | 166.2   | Detected | 229.8   | Detected | 167.8   | Detected | 257.4    | Detected   | Cdh8          | 1.548736462 | 1.00962696 | 1.12010444 | 0.7302002 |
| A_51_P2177 | 670.7   | Detected | 685.4   | Detected | 625.6   | Detected | 1038.7   | Detected   | Ribc1         | 1.548680483 | 0.93275682 | 1.51546542 | 0.9127517 |
| A_55_P2060 | 17203.4 | Detected | 15304.4 | Detected | 19628.1 | Detected | 26637    | Detected   | Tprgl         | 1.54835672  | 1.14094307 | 1.74047986 | 1.2825135 |
| A_55_P1961 | 330.5   | Detected | 92.5    | Detected | 385.7   | Detected | 511.6    | Detected   | Adamts7       | 1.54795764  | 1.16701967 | 5.53081081 | 4.1697297 |
| A_55_P2030 | 97863.4 | Detected | 95152.5 | Detected | 135881  | Detected | 151484.5 | Detected   | Gpi1          | 1.547917812 | 1.38847618 | 1.59201808 | 1.4280339 |
| A_55_P2058 | 2082.4  | Detected | 1322.7  | Detected | 1917.7  | Detected | 3223.1   | Detected   | Ralgds        | 1.547781406 | 0.92090857 | 2.43675815 | 1.4498375 |
| A_55_P1971 | 24.1    | Detected | 19.7    | Detected | 18.8    | Detected | 37.3     | Not Detect | Cr2           | 1.547717842 | 0.78008299 | 1.89340102 | 0.9543147 |
| A_55_P2067 | 29.4    | Detected | 388.6   | Detected | 28.8    | Detected | 45.5     | Not Detect | Mxra7         | 1.547619048 | 0.97959184 | 0.11708698 | 0.0741122 |
| A_51_P2546 | 5681.1  | Detected | 3700    | Detected | 7020.6  | Detected | 8792     | Detected   | Jdp2          | 1.547587615 | 1.2357818  | 2.37621622 | 1.8974595 |
| A_55_P2404 | 210.2   | Detected | 162     | Detected | 335.6   | Detected | 325.3    | Detected   | 1700001L05Rik | 1.547573739 | 1.59657469 | 2.00802469 | 2.0716049 |
| A_52_P9390 | 12049.7 | Detected | 16649   | Detected | 17520.9 | Detected | 18646    | Detected   | Alg5          | 1.547424417 | 1.4540528  | 1.11994714 | 1.0523695 |
| A_55_P2176 | 1665.6  | Detected | 2040.6  | Detected | 2485.3  | Detected | 2577.2   | Detected   | Slc33a1       | 1.547310279 | 1.49213497 | 1.26296187 | 1.2179261 |
| A_55_P2170 | 1230.1  | Detected | 414.8   | Detected | 1518.9  | Detected | 1903.3   | Detected   | Ppfibp2       | 1.547272579 | 1.23477766 | 4.58847637 | 3.6617647 |
| A_55_P2359 | 108     | Detected | 193.6   | Detected | 116.7   | Detected | 167.1    | Detected   | C230073G13Rik | 1.547222222 | 1.08055556 | 0.86311983 | 0.6027893 |
| A_55_P2002 | 4469.5  | Detected | 5772.9  | Detected | 4545.2  | Detected | 6915.1   | Detected   | Zfp747        | 1.547175299 | 1.01693702 | 1.1978555  | 0.7873339 |
| A_55_P2024 | 678.7   | Detected | 1081.4  | Detected | 541.8   | Detected | 1050     | Detected   | Napepld       | 1.547075291 | 0.79829085 | 0.97096357 | 0.5010172 |
| A_55_P1993 | 8649    | Detected | 7731.4  | Detected | 8758.1  | Detected | 13380.1  | Detected   | Tbc1d14       | 1.547011215 | 1.01261418 | 1.730618   | 1.1327961 |
| A_52_P4786 | 742.1   | Detected | 748.1   | Detected | 871.1   | Detected | 1147.9   | Detected   | Arcn1         | 1.546826573 | 1.17383102 | 1.53442053 | 1.1644165 |
| A_55_P2052 | 48.1    | Detected | 64.3    | Detected | 18.2    | Detected | 74.4     | Detected   | Lrrc14b       | 1.546777547 | 0.37837838 | 1.15707621 | 0.2830482 |
| A_52_P7154 | 1422.3  | Detected | 1905    | Detected | 2124.1  | Detected | 2199.9   | Detected   | Slc25a26      | 1.546720101 | 1.49342614 | 1.15480315 | 1.1150131 |
| A_55_P1964 | 73.9    | Detected | 67.2    | Detected | 84.7    | Detected | 114.3    | Detected   | Slc23a3       | 1.546684709 | 1.14614344 | 1.70089286 | 1.2604167 |
| A_55_P2071 | 49.4    | Detected | 40.2    | Detected | 53      | Detected | 76.4     | Detected   | Gab2          | 1.546558704 | 1.07287449 | 1.90049751 | 1.318408  |
| A_52_P3238 | 379.2   | Detected | 496     | Detected | 550.9   | Detected | 586.3    | Detected   | Ufm1          | 1.546149789 | 1.45279536 | 1.18205645 | 1.1106855 |
| A_55_P1999 | 15226.2 | Detected | 12773.1 | Detected | 15863.4 | Detected | 23541.9  | Detected   | Adrbk1        | 1.546144146 | 1.04184892 | 1.84308429 | 1.2419381 |
| A_55_P1985 | 4475.2  | Detected | 5107    | Detected | 3901.9  | Detected | 6918.8   | Detected   | Gatad1        | 1.546031462 | 0.87189399 | 1.35476797 | 0.7640298 |
| A_66_P1399 | 1676.9  | Detected | 1703.7  | Detected | 2195.7  | Detected | 2591.5   | Detected   | Arl6          | 1.545411175 | 1.3093804  | 1.52110113 | 1.2887832 |
| A_55_P1955 | 12077.2 | Detected | 15030.7 | Detected | 17789.3 | Detected | 18664    | Detected   | Afg3l2        | 1.545391316 | 1.47296559 | 1.24172527 | 1.183531  |
| A_51_P4372 | 2576.1  | Detected | 4300.3  | Detected | 2651.9  | Detected | 3980.6   | Detected   | Smco4         | 1.545203991 | 1.02942432 | 0.92565635 | 0.6166779 |
| A_55_P2103 | 120.2   | Detected | 106.7   | Detected | 87.7    | Detected | 185.7    | Detected   | Gm831         | 1.544925125 | 0.7296173  | 1.74039363 | 0.8219306 |
| A_55_P2177 | 959.6   | Detected | 601.1   | Detected | 863.9   | Detected | 1482.3   | Detected   | Gm10725       | 1.544706128 | 0.90027095 | 2.46597904 | 1.4371985 |
| A_55_P2000 | 875     | Detected | 874.6   | Detected | 901.1   | Detected | 1351.6   | Detected   | Gskip         | 1.544685714 | 1.02982857 | 1.54539218 | 1.0302996 |
| A_55_P2184 | 3325    | Detected | 4257.2  | Detected | 5563.1  | Detected | 5135.7   | Detected   | Cdadc1        | 1.544571429 | 1.67311278 | 1.20635629 | 1.3067509 |
| A_55_P1997 | 6004.9  | Detected | 7011.6  | Detected | 5423.3  | Detected | 9274.4   | Detected   | Vps9d1        | 1.544472015 | 0.90314576 | 1.32272235 | 0.7734754 |
| A_55_P2032 | 9063.2  | Detected | 10061.1 | Detected | 10149.2 | Detected | 13997.7  | Detected   | Zbtb8os       | 1.544454497 | 1.11982523 | 1.39126934 | 1.0087565 |
| A_51_P3878 | 563.6   | Detected | 596.1   | Detected | 678.3   | Detected | 870.4    | Detected   | Tekt4         | 1.5443577   | 1.20351313 | 1.46015769 | 1.1378963 |
| A_52_P1100 | 1951.9  | Detected | 1790    | Detected | 2557.6  | Detected | 3014.3   | Detected   | Ndufaf3       | 1.544290179 | 1.31031303 | 1.68396648 | 1.4288268 |
| A_55_P2078 | 334.1   | Detected | 328.9   | Detected | 430     | Detected | 515.9    | Detected   | Tstd1         | 1.544148459 | 1.28703981 | 1.56856187 | 1.3073883 |

|            |                  |                   |                   |                   |               |             |            |            |           |
|------------|------------------|-------------------|-------------------|-------------------|---------------|-------------|------------|------------|-----------|
| A_55_P2071 | 51.5 Detected    | 59.3 Detected     | 50.8 Detected     | 79.5 Detected     | Spocd1        | 1.54368932  | 0.98640777 | 1.34064081 | 0.856661  |
| A_55_P2102 | 2195.6 Detected  | 2269.7 Detected   | 3249.4 Detected   | 3388.8 Detected   | Prorsd1       | 1.543450537 | 1.47995992 | 1.49306076 | 1.4316429 |
| A_55_P2097 | 143.2 Detected   | 170.1 Detected    | 130.1 Detected    | 221 Detected      | Tulp1         | 1.543296089 | 0.90851955 | 1.29923574 | 0.7648442 |
| A_55_P2150 | 99.8 Detected    | 97.6 Detected     | 156.7 Detected    | 154 Detected      | Mul1          | 1.543086172 | 1.57014028 | 1.57786885 | 1.6055328 |
| A_51_P2979 | 2521.8 Detected  | 2702.2 Detected   | 3502.3 Detected   | 3891.3 Detected   | Recql         | 1.543064478 | 1.38880958 | 1.44004885 | 1.2960921 |
| A_55_P2180 | 1992.6 Detected  | 2985.1 Detected   | 3560.4 Detected   | 3074.7 Detected   | Pex3          | 1.543059319 | 1.7868112  | 1.03001574 | 1.1927239 |
| A_52_P1065 | 4241.4 Detected  | 5378.1 Detected   | 5904.5 Detected   | 6543.6 Detected   | Chrac1        | 1.542792474 | 1.3921111  | 1.21671222 | 1.0978784 |
| A_55_P2001 | 28.2 Detected    | 21.3 Detected     | 32.8 Detected     | 43.5 Not Detect   | Cpz           | 1.542553191 | 1.16312057 | 2.04225352 | 1.5399061 |
| A_55_P1984 | 6812.4 Detected  | 6650.9 Detected   | 6453.3 Detected   | 10507.7 Detected  | Pdcd4         | 1.54243732  | 0.9472873  | 1.57989144 | 0.9702897 |
| A_55_P1954 | 349.4 Detected   | 1117.3 Detected   | 3.7 Not Detect    | 538.9 Detected    | Ldhd          | 1.542358329 | 0.01058958 | 0.48232346 | 0.0033116 |
| A_55_P2030 | 52 Detected      | 53.6 Detected     | 81 Detected       | 80.2 Detected     | Nedd4l        | 1.542307692 | 1.55769231 | 1.49626866 | 1.511194  |
| A_55_P2075 | 404.4 Detected   | 405.1 Detected    | 408.7 Detected    | 623.6 Detected    | Gpatch2       | 1.542037587 | 1.01063304 | 1.53937299 | 1.0088867 |
| A_55_P2132 | 3151 Detected    | 3027.6 Detected   | 2603.8 Detected   | 4858.7 Detected   | Szt2          | 1.541954935 | 0.82634084 | 1.60480248 | 0.8600211 |
| A_55_P2098 | 26804.1 Detected | 25113.4 Detected  | 29411.9 Detected  | 41327.8 Detected  | Galnt10       | 1.54184621  | 1.09729109 | 1.64564734 | 1.1711636 |
| A_52_P6106 | 56.3 Detected    | 38.5 Detected     | 31.3 Detected     | 86.8 Detected     | Evc           | 1.541740675 | 0.55595027 | 2.25454545 | 0.812987  |
| A_55_P2304 | 173.9 Detected   | 201.1 Detected    | 179.7 Detected    | 268.1 Detected    | 5730407M17Rik | 1.541690627 | 1.0333525  | 1.33316758 | 0.8935853 |
| A_55_P2117 | 40.8 Detected    | 28.3 Detected     | 27.3 Detected     | 62.9 Detected     | Fcer2a        | 1.541666667 | 0.66911765 | 2.22261484 | 0.9646643 |
| A_66_P1176 | 9.6 Not Detect   | 21.4 Detected     | 8.5 Not Detect    | 14.8 Not Detect   | Csnk2a2       | 1.541666667 | 0.88541667 | 0.69158879 | 0.3971963 |
| A_55_P2083 | 120.6 Detected   | 107.8 Detected    | 98.3 Detected     | 185.9 Detected    | Rad1          | 1.54145937  | 0.81509121 | 1.7244898  | 0.9118738 |
| A_55_P1980 | 2993.8 Detected  | 4125.8 Detected   | 3331.7 Detected   | 4614.3 Detected   | Rbms2         | 1.541285323 | 1.11286659 | 1.11840128 | 0.8075282 |
| A_55_P2110 | 55.8 Detected    | 53.7 Detected     | 67.1 Detected     | 86 Detected       | Rasgrp1       | 1.541218638 | 1.20250896 | 1.60148976 | 1.2495345 |
| A_55_P2047 | 253.7 Detected   | 280.9 Detected    | 241.1 Detected    | 391 Detected      | Ankrd23       | 1.541190382 | 0.95033504 | 1.39195443 | 0.8583126 |
| A_52_P3669 | 13509.7 Detected | 12670.7 Detected  | 15970.7 Detected  | 20820.6 Detected  | Gna11         | 1.541159315 | 1.18216541 | 1.64320835 | 1.2604434 |
| A_55_P1992 | 99149.7 Detected | 100157.6 Detected | 141467.7 Detected | 152785.4 Detected | Gpi1          | 1.540956755 | 1.42680916 | 1.52544989 | 1.412451  |
| A_55_P2153 | 630.4 Detected   | 703 Detected      | 523.6 Detected    | 971.4 Detected    | Ermap         | 1.540926396 | 0.83058376 | 1.38179232 | 0.744808  |
| A_55_P2076 | 2761.5 Detected  | 2948.1 Detected   | 3395.2 Detected   | 4254.9 Detected   | Vps25         | 1.540793047 | 1.22947673 | 1.44326855 | 1.151657  |
| A_55_P2372 | 327.2 Detected   | 313.3 Detected    | 539.8 Detected    | 504 Detected      | 5330438D12Rik | 1.540342298 | 1.6497555  | 1.60868177 | 1.7229492 |
| A_55_P2168 | 646.1 Detected   | 917.2 Detected    | 617 Detected      | 995.2 Detected    | Prmt7         | 1.540318836 | 0.95496053 | 1.08504143 | 0.6726995 |
| A_51_P1109 | 2422.3 Detected  | 2625.9 Detected   | 3464.8 Detected   | 3730.4 Detected   | Znrd1as       | 1.540023944 | 1.43037609 | 1.42061769 | 1.3194714 |
| A_55_P2025 | 4332.4 Detected  | 4294.5 Detected   | 3955.7 Detected   | 6670.2 Detected   | Tacr2         | 1.539608531 | 0.9130505  | 1.55319595 | 0.9211084 |
| A_55_P2062 | 277.8 Detected   | 246.5 Detected    | 277.5 Detected    | 427.7 Detected    | Dbdd2         | 1.539596832 | 0.99892009 | 1.73509128 | 1.1257606 |
| A_51_P5121 | 127.7 Detected   | 179.1 Detected    | 162.7 Detected    | 196.6 Detected    | Tet1          | 1.53954581  | 1.27407987 | 1.09771078 | 0.908431  |
| A_51_P2319 | 103.8 Detected   | 115.3 Detected    | 105 Detected      | 159.8 Detected    | 1700029P11Rik | 1.539499037 | 1.01156069 | 1.3859497  | 0.9106678 |
| A_55_P2030 | 67.1 Detected    | 100.3 Detected    | 110.2 Detected    | 103.3 Detected    | 2700046G09Rik | 1.539493294 | 1.64232489 | 1.02991027 | 1.0987039 |
| A_52_P6173 | 1454.1 Detected  | 1357.6 Detected   | 1833.7 Detected   | 2238.3 Detected   | Rcan1         | 1.539302661 | 1.26105495 | 1.64871833 | 1.3506924 |
| A_55_P2164 | 11.5 Not Detect  | 21.2 Detected     | 15.5 Not Detect   | 17.7 Not Detect   | Scrt1         | 1.539130435 | 1.34782609 | 0.83490566 | 0.7311321 |
| A_55_P2302 | 244.7 Detected   | 208.8 Detected    | 231.8 Detected    | 376.6 Detected    | AI426330      | 1.53902738  | 0.94728239 | 1.80363985 | 1.1101533 |
| A_51_P4501 | 16424.9 Detected | 14820.8 Detected  | 18932.8 Detected  | 25275.9 Detected  | Mrpl36        | 1.538876949 | 1.15268891 | 1.70543425 | 1.2774479 |
| A_55_P2036 | 20.6 Detected    | 28.6 Detected     | 21.7 Detected     | 31.7 Not Detect   | Synb          | 1.538834951 | 1.05339806 | 1.10839161 | 0.7587413 |
| A_55_P2225 | 595.6 Detected   | 590 Detected      | 608 Detected      | 916.5 Detected    | 5430439M09Rik | 1.538784419 | 1.02081934 | 1.55338983 | 1.0305085 |

|            |          |          |          |          |          |          |          |            |               |             |            |            |           |
|------------|----------|----------|----------|----------|----------|----------|----------|------------|---------------|-------------|------------|------------|-----------|
| A_52_P6451 | 1927.9   | Detected | 1957.3   | Detected | 2203.9   | Detected | 2966.2   | Detected   | Sec24a        | 1.538565278 | 1.14316095 | 1.51545496 | 1.1259899 |
| A_55_P1994 | 112840.4 | Detected | 159555.5 | Detected | 153450.4 | Detected | 173608   | Detected   | Mif           | 1.538526981 | 1.35988883 | 1.0880728  | 0.9617368 |
| A_55_P2062 | 2798.1   | Detected | 3913     | Detected | 4953.8   | Detected | 4304.3   | Detected   | Gm6524        | 1.538293842 | 1.77041564 | 1.1        | 1.2659852 |
| A_52_P6034 | 152.1    | Detected | 148.1    | Detected | 178.6    | Detected | 233.9    | Detected   | Gm166         | 1.537804076 | 1.17422748 | 1.57933828 | 1.2059419 |
| A_55_P2372 | 205.5    | Detected | 175.8    | Detected | 143.9    | Detected | 316      | Detected   | 5730480H06Rik | 1.537712895 | 0.70024331 | 1.79749716 | 0.8185438 |
| A_66_P1309 | 897      | Detected | 955.3    | Detected | 1222.8   | Detected | 1379.2   | Detected   | Cyb5r4        | 1.537569677 | 1.3632107  | 1.44373495 | 1.2800167 |
| A_51_P3128 | 5145.3   | Detected | 4588     | Detected | 7282.8   | Detected | 7910.9   | Detected   | Fbxo9         | 1.537500243 | 1.41542767 | 1.72425894 | 1.5873583 |
| A_55_P2041 | 234.8    | Detected | 255.7    | Detected | 335      | Detected | 361      | Detected   | Ttc38         | 1.537478705 | 1.42674617 | 1.41181072 | 1.3101291 |
| A_51_P3350 | 644.9    | Detected | 662.6    | Detected | 641.7    | Detected | 991.4    | Detected   | Zcchc4        | 1.537292604 | 0.99503799 | 1.49622698 | 0.9684576 |
| A_65_P0303 | 1500     | Detected | 1491.7   | Detected | 1833.2   | Detected | 2305.9   | Detected   | Ncapd3        | 1.537266667 | 1.22213333 | 1.54582021 | 1.2289334 |
| A_55_P2086 | 6608.7   | Detected | 7479.5   | Detected | 6521.5   | Detected | 10157.9  | Detected   | Pan3          | 1.537049647 | 0.98680527 | 1.3580988  | 0.8719166 |
| A_55_P2343 | 3587.1   | Detected | 4915.1   | Detected | 4482.4   | Detected | 5512.4   | Detected   | Akap1         | 1.536728834 | 1.2495888  | 1.12152347 | 0.9119652 |
| A_55_P2015 | 4099.8   | Detected | 5337.6   | Detected | 6208.7   | Detected | 6299.9   | Detected   | 1500011K16Rik | 1.536635933 | 1.51439095 | 1.18028702 | 1.1632007 |
| A_55_P2020 | 35.6     | Detected | 30.7     | Detected | 25.4     | Detected | 54.7     | Detected   | Gm11543       | 1.536516854 | 0.71348315 | 1.78175896 | 0.8273616 |
| A_55_P2076 | 247.9    | Detected | 292      | Detected | 247.4    | Detected | 380.9    | Detected   | 9430076C15Rik | 1.536506656 | 0.99798306 | 1.30445205 | 0.8472603 |
| A_51_P1108 | 301.6    | Detected | 248.4    | Detected | 451.6    | Detected | 463.4    | Detected   | Pck2          | 1.536472149 | 1.49734748 | 1.86553945 | 1.8180354 |
| A_51_P3605 | 100.1    | Detected | 146.5    | Detected | 115.6    | Detected | 153.8    | Detected   | Hoxa6         | 1.536463536 | 1.15484515 | 1.04982935 | 0.7890785 |
| A_55_P2036 | 4854     | Detected | 8958     | Detected | 6435.9   | Detected | 7457.1   | Detected   | Rangrf        | 1.536279357 | 1.32589617 | 0.83245144 | 0.7184528 |
| A_51_P4963 | 44.2     | Detected | 46.7     | Detected | 38.2     | Detected | 67.9     | Detected   | Rfx4          | 1.536199095 | 0.86425339 | 1.45396146 | 0.8179872 |
| A_66_P1096 | 30.4     | Detected | 35       | Detected | 19       | Detected | 46.7     | Not Detect | LOC101056244  | 1.536184211 | 0.625      | 1.33428571 | 0.5428571 |
| A_55_P2375 | 336.3    | Detected | 333.4    | Detected | 192.3    | Detected | 516.6    | Detected   | 1110035E04Rik | 1.536128457 | 0.57181088 | 1.5494901  | 0.5767846 |
| A_52_P5150 | 24072.8  | Detected | 22812.4  | Detected | 31001.7  | Detected | 36976.3  | Detected   | Slc25a24      | 1.536019906 | 1.28783108 | 1.62088601 | 1.3589846 |
| A_66_P1268 | 1518.4   | Detected | 1397.1   | Detected | 1571     | Detected | 2332.1   | Detected   | Zbtb44        | 1.535893045 | 1.03464173 | 1.66924343 | 1.1244721 |
| A_55_P2070 | 3426.5   | Detected | 3737.4   | Detected | 4600.6   | Detected | 5262.7   | Detected   | Ing4          | 1.535882095 | 1.34265285 | 1.40811794 | 1.2309627 |
| A_55_P1957 | 29.5     | Detected | 29.9     | Detected | 25       | Detected | 45.3     | Not Detect | Speer8-ps1    | 1.53559322  | 0.84745763 | 1.51505017 | 0.8361204 |
| A_51_P1969 | 26.7     | Detected | 23.9     | Detected | 26.7     | Detected | 41       | Not Detect | Slc4a1        | 1.535580524 | 1          | 1.71548117 | 1.1171548 |
| A_52_P5987 | 4630.5   | Detected | 7964     | Detected | 4024.2   | Detected | 7110.3   | Detected   | Afg3l1        | 1.535536119 | 0.86906382 | 0.89280512 | 0.5052988 |
| A_55_P2040 | 1195.2   | Detected | 1212.3   | Detected | 1352.8   | Detected | 1834.9   | Detected   | Ano10         | 1.53522423  | 1.13186078 | 1.51356925 | 1.1158954 |
| A_51_P1609 | 34.2     | Detected | 109.6    | Detected | 49       | Detected | 52.5     | Detected   | Mr1           | 1.535087719 | 1.43274854 | 0.4790146  | 0.4470803 |
| A_55_P2099 | 8957.3   | Detected | 12401.5  | Detected | 11033.5  | Detected | 13749.9  | Detected   | Usp15         | 1.535049624 | 1.2317886  | 1.10872878 | 0.8896908 |
| A_55_P2062 | 279.2    | Detected | 317.5    | Detected | 336.3    | Detected | 428.5    | Detected   | 4932438A13Rik | 1.53474212  | 1.20451289 | 1.3496063  | 1.0592126 |
| A_52_P3845 | 5665.6   | Detected | 4964.5   | Detected | 8682     | Detected | 8693.9   | Detected   | Stard4        | 1.534506495 | 1.5324061  | 1.75121362 | 1.7488166 |
| A_55_P2024 | 91545.6  | Detected | 111077.2 | Detected | 87625.8  | Detected | 140456.5 | Detected   | Zfp658        | 1.534279092 | 0.95718199 | 1.26449442 | 0.788873  |
| A_51_P2277 | 2899.8   | Detected | 4539.3   | Detected | 4707.1   | Detected | 4448.8   | Detected   | Phykpl        | 1.534174771 | 1.62324988 | 0.98006301 | 1.0369661 |
| A_55_P2143 | 55.6     | Detected | 148.4    | Detected | 207.7    | Detected | 85.3     | Detected   | Rasgrp2       | 1.534172662 | 3.73561151 | 0.57479784 | 1.3995957 |
| A_51_P1868 | 58.6     | Detected | 56.2     | Detected | 64.6     | Detected | 89.9     | Detected   | Krt5          | 1.534129693 | 1.10238908 | 1.59964413 | 1.1494662 |
| A_51_P2648 | 33.7     | Detected | 45.2     | Detected | 40.3     | Detected | 51.7     | Detected   | Olfrl395      | 1.534124629 | 1.1958457  | 1.14380531 | 0.8915929 |
| A_51_P2423 | 12638.9  | Detected | 16285.9  | Detected | 14696.1  | Detected | 19388.7  | Detected   | Fam114a2      | 1.53404964  | 1.16276733 | 1.19052063 | 0.9023818 |
| A_55_P1953 | 8783.4   | Detected | 11304.9  | Detected | 9476.9   | Detected | 13473.1  | Detected   | Pex2          | 1.533927636 | 1.07895576 | 1.19179294 | 0.8383002 |
| A_55_P2012 | 2057.5   | Detected | 2378.3   | Detected | 2548.8   | Detected | 3156     | Detected   | Gopc          | 1.533900365 | 1.23878493 | 1.32699828 | 1.0716899 |

|            |         |            |         |            |         |          |         |            |               |             |            |            |           |
|------------|---------|------------|---------|------------|---------|----------|---------|------------|---------------|-------------|------------|------------|-----------|
| A_52_P6222 | 152.3   | Detected   | 297.1   | Detected   | 190.6   | Detected | 233.6   | Detected   | Gm4890        | 1.533814839 | 1.25147735 | 0.78626725 | 0.6415348 |
| A_55_P2172 | 73.1    | Detected   | 103.7   | Detected   | 76.3    | Detected | 112.1   | Detected   | Insr          | 1.533515732 | 1.04377565 | 1.08100289 | 0.7357763 |
| A_51_P4358 | 295.6   | Detected   | 294.1   | Detected   | 30.7    | Detected | 453.3   | Detected   | Zbtb8a        | 1.533491204 | 0.10385656 | 1.54131248 | 0.1043863 |
| A_55_P2068 | 1290    | Detected   | 1616.7  | Detected   | 2164.8  | Detected | 1978.2  | Detected   | Hist1h3g      | 1.533488372 | 1.67813953 | 1.22360364 | 1.3390239 |
| A_52_P6128 | 4112.1  | Detected   | 4379.4  | Detected   | 4784.9  | Detected | 6305.7  | Detected   | Ccng1         | 1.533450062 | 1.1636147  | 1.43985477 | 1.0925926 |
| A_52_P6727 | 88.3    | Detected   | 75.7    | Detected   | 109.6   | Detected | 135.4   | Detected   | 4930515G01Rik | 1.533408834 | 1.2412231  | 1.78863937 | 1.4478203 |
| A_55_P2103 | 77.3    | Detected   | 128.7   | Detected   | 84.8    | Detected | 118.5   | Detected   | Mrpl9         | 1.532988357 | 1.09702458 | 0.92074592 | 0.6588967 |
| A_52_P3875 | 32830.4 | Detected   | 38924.3 | Detected   | 41674   | Detected | 50322.9 | Detected   | Tmpo          | 1.532814099 | 1.26937229 | 1.29284021 | 1.0706422 |
| A_55_P2097 | 1460.6  | Detected   | 1033.3  | Detected   | 1925.1  | Detected | 2238.5  | Detected   | Arl4a         | 1.532589347 | 1.31801999 | 2.16636021 | 1.8630601 |
| A_52_P3333 | 311     | Detected   | 407.9   | Detected   | 365.4   | Detected | 476.6   | Detected   | Raver1        | 1.532475884 | 1.17491961 | 1.16842363 | 0.8958078 |
| A_52_P4046 | 1603.4  | Detected   | 1825.2  | Detected   | 1729.1  | Detected | 2456.7  | Detected   | Baz2a         | 1.532181614 | 1.07839591 | 1.34598948 | 0.9473482 |
| A_55_P2044 | 1817.2  | Detected   | 2729.4  | Detected   | 1900.8  | Detected | 2784.1  | Detected   | Zfp869        | 1.532082324 | 1.04600484 | 1.02004103 | 0.6964168 |
| A_52_P3530 | 3724    | Detected   | 4402.4  | Detected   | 4519    | Detected | 5705.4  | Detected   | Chkb          | 1.532062299 | 1.21348013 | 1.29597492 | 1.0264856 |
| A_51_P4916 | 25      | Detected   | 22.8    | Detected   | 31.4    | Detected | 38.3    | Not Detect | Derl3         | 1.532       | 1.256      | 1.67982456 | 1.377193  |
| A_55_P2287 | 6010.8  | Detected   | 5516.1  | Detected   | 5855.4  | Detected | 9206.8  | Detected   | Snap23        | 1.531709589 | 0.97414654 | 1.66907779 | 1.0615109 |
| A_55_P2030 | 674.5   | Detected   | 639     | Detected   | 740.1   | Detected | 1033.1  | Detected   | 2010002M12Rik | 1.531653076 | 1.09725723 | 1.61674491 | 1.158216  |
| A_52_P5991 | 343.1   | Detected   | 316.5   | Detected   | 359.9   | Detected | 525.5   | Detected   | Sptlc2        | 1.531623433 | 1.04896532 | 1.66034755 | 1.1371248 |
| A_52_P2498 | 590.2   | Detected   | 762.3   | Detected   | 569.7   | Detected | 903.9   | Detected   | Cc2d2a        | 1.531514741 | 0.96526601 | 1.18575364 | 0.7473436 |
| A_55_P2100 | 93.9    | Detected   | 95.7    | Detected   | 84.7    | Detected | 143.8   | Detected   | Zscan22       | 1.5314164   | 0.90202343 | 1.50261233 | 0.8850575 |
| A_55_P2073 | 76.4    | Detected   | 70.2    | Detected   | 71.2    | Detected | 117     | Detected   | 2610528J11Rik | 1.531413613 | 0.93193717 | 1.66666667 | 1.014245  |
| A_51_P1273 | 100.3   | Detected   | 102.5   | Detected   | 155.8   | Detected | 153.6   | Detected   | Zfp91         | 1.531405783 | 1.55333998 | 1.49853659 | 1.52      |
| A_52_P5052 | 3799    | Detected   | 4828.1  | Detected   | 5508.6  | Detected | 5817.8  | Detected   | Stt3a         | 1.531403001 | 1.45001316 | 1.20498747 | 1.1409457 |
| A_55_P2169 | 13933.8 | Detected   | 13042.1 | Detected   | 12476.1 | Detected | 21336.3 | Detected   | Fgf23         | 1.531262111 | 0.89538389 | 1.63595587 | 0.9566021 |
| A_55_P2051 | 76.8    | Detected   | 88.8    | Detected   | 108.1   | Detected | 117.6   | Detected   | Nfkbib        | 1.53125     | 1.40755208 | 1.32432432 | 1.2173423 |
| A_52_P4955 | 243.6   | Detected   | 289.7   | Detected   | 211.6   | Detected | 373     | Detected   | Efnb3         | 1.531198686 | 0.86863711 | 1.28753883 | 0.7304108 |
| A_52_P2949 | 40.3    | Detected   | 38.5    | Detected   | 51.3    | Detected | 61.7    | Detected   | Cd6           | 1.53101737  | 1.27295285 | 1.6025974  | 1.3324675 |
| A_65_P0756 | 1257.6  | Detected   | 1171    | Detected   | 1215.7  | Detected | 1925.4  | Compromis  | Rock1         | 1.53101145  | 0.96668257 | 1.6442357  | 1.0381725 |
| A_55_P2439 | 92.9    | Detected   | 102.1   | Detected   | 61.5    | Detected | 142.2   | Detected   | Ddhd2         | 1.530678149 | 0.66200215 | 1.3927522  | 0.6023506 |
| A_51_P1496 | 296.8   | Detected   | 885.4   | Detected   | 661     | Detected | 454.3   | Detected   | Leprel2       | 1.530660377 | 2.22708895 | 0.51310142 | 0.7465552 |
| A_52_P6636 | 658.4   | Detected   | 932.6   | Detected   | 1029.4  | Detected | 1007.7  | Detected   | Pak1          | 1.530528554 | 1.56348724 | 1.08052756 | 1.1037958 |
| A_55_P1974 | 162.7   | Detected   | 180.8   | Detected   | 177.5   | Detected | 249     | Detected   | Trappc9       | 1.530424093 | 1.09096497 | 1.37721239 | 0.9817478 |
| A_51_P2552 | 1050.2  | Detected   | 773.2   | Detected   | 1160    | Detected | 1607.2  | Detected   | Gltf          | 1.530375167 | 1.10455151 | 2.07863425 | 1.5002587 |
| A_65_P1675 | 6.6     | Not Detect | 6.2     | Not Detect | 21.2    | Detected | 10.1    | Not Detect | Bex1          | 1.53030303  | 3.21212121 | 1.62903226 | 3.4193548 |
| A_52_P4887 | 36.4    | Detected   | 8.3     | Not Detect | 111.8   | Detected | 55.7    | Detected   | Pilrb2        | 1.53021978  | 3.07142857 | 6.71084337 | 13.46988  |
| A_51_P3512 | 6890    | Detected   | 6761.7  | Detected   | 10769.6 | Detected | 10542.8 | Detected   | Plgrkt        | 1.530159652 | 1.56307692 | 1.55919369 | 1.5927356 |
| A_55_P2258 | 61.5    | Detected   | 55.9    | Detected   | 52.4    | Detected | 94.1    | Detected   | E330032C10Rik | 1.530081301 | 0.85203252 | 1.68336315 | 0.9373882 |
| A_55_P1973 | 151.3   | Detected   | 174     | Detected   | 149.6   | Detected | 231.5   | Detected   | Ybx2          | 1.530072703 | 0.98876404 | 1.33045977 | 0.8597701 |
| A_51_P1915 | 11495.1 | Detected   | 14055.9 | Detected   | 13187.5 | Detected | 17586.3 | Detected   | Arpc1a        | 1.529895347 | 1.14722795 | 1.25116855 | 0.9382181 |
| A_55_P2000 | 177.4   | Detected   | 138.4   | Detected   | 263.9   | Detected | 271.4   | Detected   | Slc6a1        | 1.529875986 | 1.48759865 | 1.96098266 | 1.9067919 |
| A_55_P2096 | 2400.2  | Detected   | 2638.5  | Detected   | 2454.4  | Detected | 3671.9  | Detected   | Rc3h1         | 1.529830847 | 1.02258145 | 1.39166193 | 0.9302255 |

|            |         |          |         |            |         |          |         |            |               |             |            |            |           |
|------------|---------|----------|---------|------------|---------|----------|---------|------------|---------------|-------------|------------|------------|-----------|
| A_55_P2051 | 5400.2  | Detected | 4669.4  | Detected   | 8353.6  | Detected | 8260.6  | Detected   | Efh2          | 1.529684086 | 1.54690567 | 1.76909239 | 1.7890093 |
| A_55_P2171 | 69.3    | Detected | 133.8   | Detected   | 120.4   | Detected | 106     | Detected   | Prcp          | 1.52958153  | 1.73737374 | 0.7922272  | 0.8998505 |
| A_55_P2092 | 382.8   | Detected | 423.8   | Detected   | 282.5   | Detected | 585.5   | Detected   | Wdfy1         | 1.529519331 | 0.73798328 | 1.3815479  | 0.666588  |
| A_52_P5852 | 31554.3 | Detected | 31581.3 | Detected   | 46731.7 | Detected | 48250.3 | Detected   | Neu1          | 1.529119645 | 1.48099308 | 1.52781234 | 1.4797269 |
| A_52_P5687 | 204.7   | Detected | 305.6   | Detected   | 196.1   | Detected | 313     | Detected   | Sec63         | 1.529066927 | 0.9579873  | 1.02421466 | 0.6416885 |
| A_55_P2240 | 466.1   | Detected | 418.5   | Detected   | 830.3   | Detected | 712.6   | Detected   | 1110019D14Rik | 1.528856469 | 1.78137739 | 1.70274791 | 1.9839904 |
| A_55_P2018 | 251.8   | Detected | 351     | Detected   | 336.3   | Detected | 384.9   | Detected   | Adh5          | 1.528594122 | 1.3355838  | 1.0965812  | 0.9581197 |
| A_55_P1983 | 591.8   | Detected | 543.2   | Detected   | 473.1   | Detected | 904.6   | Detected   | Gm3556        | 1.528556945 | 0.79942548 | 1.66531664 | 0.8709499 |
| A_51_P4444 | 11131.1 | Detected | 6176.2  | Detected   | 10574.6 | Detected | 17013.2 | Detected   | Cebpδ         | 1.528438339 | 0.95000494 | 2.75463877 | 1.7121531 |
| A_55_P2010 | 1639.4  | Detected | 1547.2  | Detected   | 1222.8  | Detected | 2505.1  | Detected   | BC037034      | 1.528059046 | 0.74588264 | 1.61911841 | 0.7903309 |
| A_52_P2299 | 633.7   | Detected | 561.7   | Detected   | 272.7   | Detected | 968.3   | Detected   | 6-Sep         | 1.528010099 | 0.43032981 | 1.72387395 | 0.4854905 |
| A_55_P1975 | 13846.7 | Detected | 23925.3 | Detected   | 14485   | Detected | 21157.7 | Detected   | Nutf2         | 1.52799584  | 1.04609763 | 0.88432329 | 0.6054261 |
| A_55_P2171 | 11254.9 | Detected | 13548.1 | Detected   | 13226.3 | Detected | 17197.3 | Detected   | Lta4h         | 1.527983367 | 1.17515926 | 1.26935142 | 0.9762476 |
| A_55_P1969 | 16.1    | Detected | 16.8    | Not Detect | 23.8    | Detected | 24.6    | Not Detect | Dpp10         | 1.527950311 | 1.47826087 | 1.46428571 | 1.4166667 |
| A_55_P2112 | 982.5   | Detected | 1382.9  | Detected   | 993.1   | Detected | 1501.1  | Detected   | Rwdd4a        | 1.52783715  | 1.0107888  | 1.08547256 | 0.7181286 |
| A_55_P1977 | 16689.7 | Detected | 15526.5 | Detected   | 15786.5 | Detected | 25498.9 | Detected   | Itgam         | 1.527822549 | 0.94588279 | 1.64228255 | 1.0167456 |
| A_55_P2052 | 932.1   | Detected | 1297.5  | Detected   | 851.4   | Detected | 1423.9  | Detected   | Pcm1          | 1.527625791 | 0.91342131 | 1.09741811 | 0.656185  |
| A_55_P2032 | 4061.9  | Detected | 1439.8  | Detected   | 6598    | Detected | 6204.4  | Detected   | Dbp           | 1.527462518 | 1.62436298 | 4.30920961 | 4.5825809 |
| A_55_P2031 | 25.8    | Detected | 15.3    | Not Detect | 100.8   | Detected | 39.4    | Not Detect | 9030617O03Rik | 1.527131783 | 3.90697674 | 2.5751634  | 6.5882353 |
| A_52_P6230 | 631     | Detected | 852.3   | Detected   | 653.1   | Detected | 963.6   | Detected   | R3hdm4        | 1.527099842 | 1.03502377 | 1.13058782 | 0.7662795 |
| A_55_P2070 | 5396.8  | Detected | 6549.2  | Detected   | 6297.4  | Detected | 8240.9  | Detected   | Mfn1          | 1.52699748  | 1.16687667 | 1.25830636 | 0.9615526 |
| A_55_P1993 | 37.6    | Detected | 46.2    | Detected   | 61.7    | Detected | 57.4    | Detected   | BC048609      | 1.526595745 | 1.64095745 | 1.24242424 | 1.3354978 |
| A_55_P2113 | 236.1   | Detected | 411.2   | Detected   | 374.8   | Detected | 360.4   | Detected   | Pecr          | 1.526471834 | 1.58746294 | 0.87645914 | 0.9114786 |
| A_55_P1959 | 13897.1 | Detected | 12956.8 | Detected   | 12958   | Detected | 21213.4 | Detected   | Ppp1r2        | 1.526462355 | 0.93242475 | 1.63724068 | 1.0000926 |
| A_51_P1632 | 399.8   | Detected | 678.7   | Detected   | 506.4   | Detected | 610.2   | Detected   | Schip1        | 1.526263132 | 1.26663332 | 0.89907175 | 0.7461323 |
| A_55_P2077 | 397.6   | Detected | 520.9   | Detected   | 456.6   | Detected | 606.8   | Detected   | Dcxr          | 1.526156942 | 1.14839034 | 1.16490689 | 0.8765598 |
| A_55_P2065 | 3755.8  | Detected | 5881.8  | Detected   | 4805.2  | Detected | 5731.4  | Detected   | Mettl1        | 1.5260131   | 1.27940785 | 0.9744296  | 0.8169608 |
| A_55_P1983 | 1158.4  | Detected | 1005.6  | Detected   | 1171.5  | Detected | 1767.6  | Detected   | Enox2         | 1.52589779  | 1.0113087  | 1.75775656 | 1.1649761 |
| A_52_P3334 | 275.2   | Detected | 435.1   | Detected   | 264.2   | Detected | 419.9   | Detected   | Nfatc3        | 1.525799419 | 0.96002907 | 0.9650655  | 0.6072167 |
| A_66_P1089 | 2240.6  | Detected | 3096.5  | Detected   | 3043.6  | Detected | 3418.3  | Detected   | Smpdl3b       | 1.525618138 | 1.35838615 | 1.10392378 | 0.9829162 |
| A_51_P1420 | 11098.5 | Detected | 12026.5 | Detected   | 15103.1 | Detected | 16929.6 | Detected   | Asb8          | 1.525395324 | 1.36082353 | 1.40769135 | 1.2558184 |
| A_55_P2135 | 3004.1  | Detected | 3712.3  | Detected   | 3921.8  | Detected | 4581.7  | Detected   | Ccdc174       | 1.525148963 | 1.30548251 | 1.23419443 | 1.056434  |
| A_52_P2202 | 7008.9  | Detected | 6016.1  | Detected   | 8587.8  | Detected | 10688.9 | Detected   | Plekhh2       | 1.525046726 | 1.22527073 | 1.77671581 | 1.4274696 |
| A_55_P2060 | 28852.2 | Detected | 30656.4 | Detected   | 31046.2 | Detected | 43996.1 | Detected   | Lamtor3       | 1.524878519 | 1.07604273 | 1.43513589 | 1.0127151 |
| A_52_P1999 | 13361.7 | Detected | 19069.8 | Detected   | 15256.4 | Detected | 20374.8 | Detected   | Cnbp          | 1.524865848 | 1.14180082 | 1.06843281 | 0.8000294 |
| A_55_P1982 | 4816.6  | Detected | 3901.1  | Detected   | 4200.7  | Detected | 7342.3  | Detected   | Gys1          | 1.52437404  | 0.87212972 | 1.88211017 | 1.0767989 |
| A_55_P1956 | 1345.8  | Detected | 1926.9  | Detected   | 1148.2  | Detected | 2051.5  | Detected   | Syt11         | 1.524372121 | 0.85317283 | 1.06466345 | 0.5958794 |
| A_55_P1991 | 866.6   | Detected | 1226.5  | Detected   | 857.1   | Detected | 1321    | Detected   | Sesn1         | 1.524348027 | 0.98903762 | 1.07704851 | 0.6988178 |
| A_52_P2791 | 14770.2 | Detected | 13689.5 | Detected   | 23553.3 | Detected | 22514.1 | Detected   | Vamp8         | 1.524292156 | 1.59465004 | 1.64462544 | 1.7205376 |
| A_51_P3823 | 1006.5  | Detected | 1329.4  | Detected   | 799.3   | Detected | 1534.2  | Detected   | Zfp608        | 1.524292101 | 0.7941381  | 1.15405446 | 0.6012487 |



|            |         |            |         |            |         |          |         |            |               |             |            |            |           |
|------------|---------|------------|---------|------------|---------|----------|---------|------------|---------------|-------------|------------|------------|-----------|
| A_65_P1893 | 41.2    | Detected   | 31.9    | Detected   | 36.3    | Detected | 62.8    | Detected   | Grin1         | 1.524271845 | 0.88106796 | 1.96865204 | 1.137931  |
| A_51_P3185 | 22853.4 | Detected   | 26384.5 | Detected   | 33621.8 | Detected | 34830.4 | Detected   | Fdx1l         | 1.524079568 | 1.47119466 | 1.3201084  | 1.2743012 |
| A_55_P2072 | 54      | Detected   | 80.6    | Detected   | 37.2    | Detected | 82.3    | Detected   | Sin3b         | 1.524074074 | 0.68888889 | 1.02109181 | 0.4615385 |
| A_51_P5058 | 6706.1  | Detected   | 6742.9  | Detected   | 7375.2  | Detected | 10220.3 | Detected   | Endod1        | 1.52403036  | 1.09977483 | 1.51571282 | 1.0937727 |
| A_55_P2064 | 360.3   | Detected   | 336.2   | Detected   | 427.2   | Detected | 549.1   | Detected   | Hemk1         | 1.524007771 | 1.1856786  | 1.63325402 | 1.2706722 |
| A_51_P1508 | 7025    | Detected   | 7087.4  | Detected   | 7184.4  | Detected | 10706.1 | Detected   | Mpv17         | 1.524       | 1.02269039 | 1.51058216 | 1.0136863 |
| A_55_P2153 | 5013.4  | Detected   | 3550.9  | Detected   | 4046.7  | Detected | 7639.7  | Detected   | Ahnak         | 1.523856066 | 0.80717677 | 2.15148272 | 1.1396266 |
| A_55_P2181 | 4471.5  | Detected   | 4279.3  | Detected   | 4240.2  | Detected | 6813.8  | Detected   | Ppp1r2        | 1.523828693 | 0.94827239 | 1.59226976 | 0.990863  |
| A_55_P1996 | 12.6    | Not Detect | 8.7     | Not Detect | 17.4    | Detected | 19.2    | Not Detect | Nphs2         | 1.523809524 | 1.38095238 | 2.20689655 | 2         |
| A_51_P1741 | 6.3     | Not Detect | 10.9    | Not Detect | 26.1    | Detected | 9.6     | Not Detect | Pip           | 1.523809524 | 4.14285714 | 0.88073394 | 2.3944954 |
| A_66_P1384 | 6817.2  | Detected   | 2915.4  | Detected   | 265.8   | Detected | 10387.7 | Detected   | Sprr2h        | 1.523748753 | 0.03898961 | 3.56304452 | 0.091171  |
| A_52_P9445 | 178.6   | Detected   | 188.6   | Detected   | 272.3   | Detected | 272.1   | Detected   | Xndr          | 1.523516237 | 1.52463606 | 1.44273595 | 1.4437964 |
| A_51_P1686 | 59.6    | Detected   | 215.8   | Detected   | 34.9    | Detected | 90.8    | Detected   | Nuak1         | 1.523489933 | 0.58557047 | 0.42075996 | 0.1617238 |
| A_51_P4256 | 5576.1  | Detected   | 5502.8  | Detected   | 8959.7  | Detected | 8494.1  | Detected   | Nt5c2         | 1.523304819 | 1.60680404 | 1.54359599 | 1.6282075 |
| A_55_P2133 | 58.3    | Detected   | 54.3    | Detected   | 57.8    | Detected | 88.8    | Detected   | Ino80e        | 1.523156089 | 0.99142367 | 1.63535912 | 1.0644567 |
| A_51_P1706 | 1603.1  | Detected   | 1903.2  | Detected   | 2265.7  | Detected | 2441.7  | Detected   | Dcaf4         | 1.523111472 | 1.41332418 | 1.28294451 | 1.1904687 |
| A_52_P5813 | 546.4   | Detected   | 785.5   | Detected   | 554     | Detected | 832.2   | Detected   | Hcfc2         | 1.523060029 | 1.01390922 | 1.05945258 | 0.7052833 |
| A_55_P2243 | 1788.4  | Detected   | 2468.9  | Detected   | 1696.2  | Detected | 2723.8  | Detected   | Ap1g1         | 1.523037352 | 0.94844554 | 1.10324436 | 0.6870266 |
| A_66_P1329 | 17.4    | Detected   | 27.8    | Detected   | 30      | Detected | 26.5    | Not Detect | 4930429E23Rik | 1.522988506 | 1.72413793 | 0.95323741 | 1.0791367 |
| A_66_P1238 | 458.6   | Detected   | 614.6   | Detected   | 593.6   | Detected | 698.4   | Detected   | Fbxo30        | 1.52289577  | 1.29437418 | 1.13634884 | 0.9658314 |
| A_55_P2114 | 3065.5  | Detected   | 2409.4  | Detected   | 3180.5  | Detected | 4668.4  | Detected   | Ankra2        | 1.522883706 | 1.03751427 | 1.93757782 | 1.3200382 |
| A_52_P4672 | 621.7   | Detected   | 579     | Detected   | 537.1   | Detected | 946.7   | Detected   | Mtf1          | 1.522760174 | 0.86392151 | 1.63506045 | 0.9276339 |
| A_55_P2147 | 123.8   | Detected   | 221.8   | Detected   | 176.7   | Detected | 188.5   | Detected   | Nt5dc1        | 1.522617124 | 1.4273021  | 0.84986474 | 0.7966637 |
| A_52_P5720 | 122.5   | Detected   | 132.3   | Detected   | 109     | Detected | 186.5   | Detected   | Pfkip         | 1.52244898  | 0.88979592 | 1.40967498 | 0.8238851 |
| A_55_P1975 | 971.6   | Detected   | 1286.7  | Detected   | 1094.5  | Detected | 1479.2  | Detected   | Fbxo33        | 1.522437217 | 1.12649238 | 1.14960752 | 0.8506256 |
| A_55_P2155 | 73.7    | Detected   | 49.9    | Detected   | 97.6    | Detected | 112.2   | Detected   | 2010315B03Rik | 1.52238806  | 1.32428765 | 2.24849699 | 1.9559118 |
| A_55_P2414 | 13.4    | Not Detect | 14      | Not Detect | 73.8    | Detected | 20.4    | Not Detect | 0610009L18Rik | 1.52238806  | 5.50746269 | 1.45714286 | 5.2714286 |
| A_51_P4893 | 36497.7 | Detected   | 32994.2 | Detected   | 46837.6 | Detected | 55554.5 | Detected   | Sri           | 1.522137011 | 1.28330278 | 1.68376563 | 1.4195707 |
| A_55_P2362 | 27.2    | Detected   | 25.5    | Detected   | 28      | Detected | 41.4    | Not Detect | Tgm4          | 1.522058824 | 1.02941176 | 1.62352941 | 1.0980392 |
| A_55_P2052 | 27.6    | Detected   | 33.8    | Detected   | 43.2    | Detected | 42      | Not Detect | Tia1          | 1.52173913  | 1.56521739 | 1.24260355 | 1.2781065 |
| A_55_P2060 | 14478.1 | Detected   | 15006.7 | Detected   | 12574   | Detected | 22025.7 | Detected   | Uso1          | 1.521311498 | 0.86848412 | 1.46772442 | 0.8378924 |
| A_55_P2182 | 155.4   | Detected   | 159.7   | Detected   | 186.9   | Detected | 236.4   | Detected   | Smg9          | 1.521235521 | 1.2027027  | 1.48027552 | 1.1703193 |
| A_55_P2181 | 115.5   | Detected   | 122.1   | Detected   | 145.1   | Detected | 175.7   | Detected   | E430018J23Rik | 1.521212121 | 1.25627706 | 1.43898444 | 1.1883702 |
| A_52_P3816 | 5633    | Detected   | 4094.4  | Detected   | 6166.1  | Detected | 8567.8  | Detected   | Aff1          | 1.521001243 | 1.09463874 | 2.09256546 | 1.5059838 |
| A_55_P1968 | 1251.2  | Detected   | 1308.9  | Detected   | 1625.3  | Detected | 1903    | Detected   | Btbd9         | 1.520939898 | 1.29899297 | 1.45389258 | 1.2417297 |
| A_66_P1086 | 26.5    | Detected   | 25.4    | Detected   | 30.3    | Detected | 40.3    | Not Detect | E030018B13Rik | 1.520754717 | 1.14339623 | 1.58661417 | 1.1929134 |
| A_55_P2088 | 1863.6  | Detected   | 2115.7  | Detected   | 2362.3  | Detected | 2834    | Detected   | Mtif3         | 1.520712599 | 1.26760034 | 1.33950938 | 1.1165572 |
| A_51_P4927 | 294.6   | Detected   | 384.6   | Detected   | 508.4   | Detected | 448     | Detected   | Bbs10         | 1.520706042 | 1.7257298  | 1.16484659 | 1.3218929 |
| A_55_P2393 | 979     | Detected   | 1085.9  | Detected   | 300.1   | Detected | 1488.7  | Detected   | 4933421H12Rik | 1.520633299 | 0.30653728 | 1.37093655 | 0.2763606 |
| A_55_P1996 | 537.6   | Detected   | 807.5   | Detected   | 757.6   | Detected | 817.4   | Detected   | 4930430D24Rik | 1.52046131  | 1.40922619 | 1.01226006 | 0.9382043 |

|            |                  |                  |                  |                  |               |             |            |            |           |
|------------|------------------|------------------|------------------|------------------|---------------|-------------|------------|------------|-----------|
| A_51_P4865 | 4583.2 Detected  | 5807 Detected    | 7714.4 Detected  | 6968.2 Detected  | Letmd1        | 1.520378775 | 1.68319078 | 1.19996556 | 1.3284656 |
| A_55_P2158 | 10346.5 Detected | 8799.7 Detected  | 9921.6 Detected  | 15729.8 Detected | Nkiras2       | 1.520301551 | 0.95893297 | 1.78753821 | 1.127493  |
| A_52_P3574 | 1406.8 Detected  | 1709.1 Detected  | 1876.4 Detected  | 2138.7 Detected  | Nfrkb         | 1.520258743 | 1.33380722 | 1.25136037 | 1.0978878 |
| A_55_P2168 | 98.8 Detected    | 107.9 Detected   | 100.5 Detected   | 150.2 Detected   | Gm5958        | 1.520242915 | 1.01720648 | 1.39202966 | 0.931418  |
| A_51_P3645 | 213.4 Detected   | 166.8 Detected   | 267.6 Detected   | 324.4 Detected   | D330050I16Rik | 1.520149953 | 1.25398313 | 1.94484412 | 1.6043165 |
| A_55_P2020 | 270.5 Detected   | 255.7 Detected   | 240.3 Detected   | 411.2 Detected   | 2610035D17Rik | 1.520147874 | 0.8883549  | 1.60813453 | 0.9397732 |
| A_55_P1973 | 20890.7 Detected | 19373.1 Detected | 26930.6 Detected | 31747.6 Detected | Gm19958       | 1.519700154 | 1.28911908 | 1.63874651 | 1.3901028 |
| A_55_P2136 | 17411.4 Detected | 14273.2 Detected | 27287.2 Detected | 26457.2 Detected | Cdc42se2      | 1.519533179 | 1.5672031  | 1.85362778 | 1.9117787 |
| A_66_P1147 | 1081.4 Detected  | 1546.3 Detected  | 698 Detected     | 1643.2 Detected  | Nr2f1         | 1.519511744 | 0.64545959 | 1.06266572 | 0.4514001 |
| A_55_P1976 | 33.5 Detected    | 42.6 Detected    | 49.9 Detected    | 50.9 Detected    | Slc39a9       | 1.519402985 | 1.48955224 | 1.19483568 | 1.1713615 |
| A_66_P1363 | 6027.4 Detected  | 9489.8 Detected  | 9308.5 Detected  | 9156.5 Detected  | Mrpl9         | 1.5191459   | 1.54436407 | 0.96487808 | 0.9808953 |
| A_52_P5829 | 99.4 Detected    | 145.2 Detected   | 132.1 Detected   | 151 Detected     | Entpd4        | 1.519114688 | 1.32897384 | 1.0399449  | 0.9097796 |
| A_52_P1253 | 3222.3 Detected  | 4403.3 Detected  | 3265.3 Detected  | 4894.4 Detected  | Anp32e        | 1.518915061 | 1.01334451 | 1.11152999 | 0.7415575 |
| A_55_P2113 | 5069.4 Detected  | 6430.9 Detected  | 4579.3 Detected  | 7699.4 Detected  | Zkscan5       | 1.518799069 | 0.90332189 | 1.19725077 | 0.7120776 |
| A_52_P1149 | 107.6 Detected   | 467.5 Detected   | 18.6 Detected    | 163.4 Detected   | Ifitm10       | 1.518587361 | 0.17286245 | 0.34951872 | 0.0397861 |
| A_55_P2062 | 2714.2 Detected  | 2606.5 Detected  | 2406.7 Detected  | 4121.7 Detected  | Pdzrn3        | 1.518569007 | 0.88670695 | 1.58131594 | 0.9233455 |
| A_55_P2174 | 191.9 Detected   | 242 Detected     | 234.1 Detected   | 291.4 Detected   | Nova1         | 1.518499218 | 1.2199062  | 1.20413223 | 0.9673554 |
| A_51_P2129 | 260.4 Detected   | 333 Detected     | 228.7 Detected   | 395.4 Detected   | Usb1          | 1.51843318  | 0.87826421 | 1.18738739 | 0.6867868 |
| A_51_P3684 | 25386 Detected   | 20411.4 Detected | 37380.4 Detected | 38546.2 Detected | Tmem98        | 1.518403845 | 1.47248089 | 1.88846429 | 1.8313491 |
| A_55_P2092 | 330.6 Detected   | 333.6 Detected   | 322.8 Detected   | 501.9 Detected   | Jmjd1c        | 1.51814882  | 0.97640653 | 1.5044964  | 0.9676259 |
| A_55_P2067 | 91.1 Detected    | 114.3 Detected   | 106.8 Detected   | 138.3 Detected   | Slc16a3       | 1.518111965 | 1.17233809 | 1.20997375 | 0.9343832 |
| A_55_P2178 | 31.1 Detected    | 45.4 Detected    | 37.4 Detected    | 47.2 Detected    | Fam53b        | 1.517684887 | 1.20257235 | 1.03964758 | 0.8237885 |
| A_52_P1327 | 65.1 Detected    | 73.4 Detected    | 98.2 Detected    | 98.8 Detected    | Stat6         | 1.517665131 | 1.50844854 | 1.34604905 | 1.3378747 |
| A_51_P1923 | 15792.2 Detected | 18198.9 Detected | 10849.5 Detected | 23965.8 Detected | Ash2l         | 1.517571966 | 0.68701638 | 1.31688179 | 0.5961624 |
| A_66_P1081 | 25.9 Detected    | 27.2 Detected    | 31.8 Detected    | 39.3 Not Detect  | Fbxw10        | 1.517374517 | 1.22779923 | 1.44485294 | 1.1691176 |
| A_51_P3775 | 3490 Detected    | 4224.1 Detected  | 5569.8 Detected  | 5295.4 Detected  | Sreb2         | 1.51730659  | 1.59593123 | 1.25361615 | 1.3185767 |
| A_55_P2158 | 14.9 Detected    | 14.3 Not Detect  | 32.9 Detected    | 22.6 Not Detect  | Nphp4         | 1.516778523 | 2.20805369 | 1.58041958 | 2.3006993 |
| A_52_P2280 | 2423.8 Detected  | 2337.4 Detected  | 4166.8 Detected  | 3676.3 Detected  | Tmem179b      | 1.516750557 | 1.71911874 | 1.57281595 | 1.7826645 |
| A_51_P4978 | 321.9 Detected   | 305.5 Detected   | 368.1 Detected   | 488.2 Detected   | Zfp790        | 1.516620068 | 1.14352283 | 1.59803601 | 1.20491   |
| A_66_P1386 | 18.2 Detected    | 10.5 Not Detect  | 6.2 Not Detect   | 27.6 Not Detect  | Olf1390       | 1.516483516 | 0.34065934 | 2.62857143 | 0.5904762 |
| A_55_P1957 | 21.7 Detected    | 29.8 Detected    | 33 Detected      | 32.9 Not Detect  | Gm16508       | 1.516129032 | 1.52073733 | 1.10402685 | 1.1073826 |
| A_55_P2139 | 65.5 Detected    | 64.4 Detected    | 64.6 Detected    | 99.3 Detected    | Ccdc142       | 1.516030534 | 0.98625954 | 1.54192547 | 1.0031056 |
| A_52_P5040 | 895.6 Detected   | 932.4 Detected   | 763.9 Detected   | 1357.7 Detected  | Cdk8          | 1.51596695  | 0.85294774 | 1.45613471 | 0.8192836 |
| A_55_P2018 | 292.9 Detected   | 303.3 Detected   | 275.7 Detected   | 444 Detected     | Tbx10         | 1.515875726 | 0.94127689 | 1.46389713 | 0.909001  |
| A_55_P2126 | 12.6 Not Detect  | 34.8 Detected    | 10.7 Not Detect  | 19.1 Not Detect  | Scn2a1        | 1.515873016 | 0.84920635 | 0.54885057 | 0.3074713 |
| A_55_P2068 | 2444.8 Detected  | 2229.9 Detected  | 2218 Detected    | 3705.7 Detected  | Nufip2        | 1.515747709 | 0.90723168 | 1.6618234  | 0.9946634 |
| A_51_P4654 | 528.8 Detected   | 584 Detected     | 454.8 Detected   | 801.5 Detected   | Btf3l4        | 1.515695915 | 0.86006051 | 1.37243151 | 0.7787671 |
| A_55_P2173 | 38.6 Detected    | 40.1 Detected    | 38.1 Detected    | 58.5 Detected    | Arhgap4       | 1.515544041 | 0.98704663 | 1.45885287 | 0.9501247 |
| A_52_P1024 | 32.4 Detected    | 25.7 Detected    | 20.6 Detected    | 49.1 Detected    | AW549877      | 1.515432099 | 0.63580247 | 1.91050584 | 0.8015564 |
| A_52_P2712 | 13 Not Detect    | 26.1 Detected    | 13.7 Not Detect  | 19.7 Not Detect  | Ago4          | 1.515384615 | 1.05384615 | 0.75478927 | 0.5249042 |

|            |         |            |          |            |          |            |          |            |               |             |            |            |           |
|------------|---------|------------|----------|------------|----------|------------|----------|------------|---------------|-------------|------------|------------|-----------|
| A_55_P2027 | 2026.4  | Detected   | 2196.4   | Detected   | 2593.9   | Detected   | 3070.6   | Detected   | Rgs3          | 1.515298066 | 1.2800533  | 1.39801493 | 1.180978  |
| A_51_P4942 | 78.6    | Detected   | 76.4     | Detected   | 159.3    | Detected   | 119.1    | Detected   | 9130024F11Rik | 1.515267176 | 2.02671756 | 1.55890052 | 2.0850785 |
| A_55_P1961 | 3051.1  | Detected   | 3122     | Detected   | 3145.7   | Detected   | 4623     | Detected   | 5830418K08Rik | 1.515191243 | 1.03100521 | 1.48078155 | 1.0075913 |
| A_52_P2658 | 11450.8 | Detected   | 11147.4  | Detected   | 14497.4  | Detected   | 17349.9  | Detected   | Aldh9a1       | 1.515169246 | 1.26606001 | 1.55640777 | 1.3005185 |
| A_55_P2153 | 19.8    | Detected   | 19.9     | Detected   | 20.3     | Detected   | 30       | Not Detect | Tsix          | 1.515151515 | 1.02525253 | 1.50753769 | 1.0201005 |
| A_55_P2078 | 2777.7  | Detected   | 2066     | Detected   | 2362.9   | Detected   | 4208.6   | Detected   | Kmt2e         | 1.515138424 | 0.85066782 | 2.03707648 | 1.1437076 |
| A_51_P2544 | 1147.2  | Detected   | 1236.9   | Detected   | 1545     | Detected   | 1738.1   | Detected   | Birc2         | 1.515080195 | 1.34675732 | 1.40520656 | 1.2490905 |
| A_55_P2074 | 412.2   | Detected   | 372.6    | Detected   | 3.2      | Not Detect | 624.5    | Detected   | Ppm1h         | 1.515041242 | 0.00776322 | 1.67606012 | 0.0085883 |
| A_55_P2028 | 86.8    | Detected   | 95.7     | Detected   | 63.5     | Detected   | 131.5    | Detected   | BE691133      | 1.514976959 | 0.73156682 | 1.37408568 | 0.6635319 |
| A_51_P2282 | 2777.3  | Detected   | 2876.1   | Detected   | 2229.6   | Detected   | 4207.2   | Detected   | Zdhc21        | 1.514852555 | 0.80279408 | 1.46281423 | 0.7752164 |
| A_55_P1968 | 4003.8  | Detected   | 4098.5   | Detected   | 3034.8   | Detected   | 6064.9   | Detected   | Kat6a         | 1.514785953 | 0.75797992 | 1.47978529 | 0.740466  |
| A_55_P2325 | 583.2   | Detected   | 386.8    | Detected   | 787.3    | Detected   | 883.4    | Detected   | 2010002M09Rik | 1.514746228 | 1.34996571 | 2.28386763 | 2.0354188 |
| A_55_P1957 | 15639.5 | Detected   | 16091.7  | Detected   | 18403    | Detected   | 23688    | Detected   | Apob          | 1.514626427 | 1.17670002 | 1.47206324 | 1.1436331 |
| A_55_P2177 | 9288.1  | Detected   | 12957.3  | Detected   | 10720.6  | Detected   | 14065.4  | Detected   | Tmem208       | 1.514346314 | 1.15422961 | 1.08551936 | 0.8273792 |
| A_51_P2016 | 7291.5  | Detected   | 10207.7  | Detected   | 10198.4  | Detected   | 11041    | Detected   | Xrcc5         | 1.514228897 | 1.39866968 | 1.08163445 | 0.9990889 |
| A_55_P2108 | 872.3   | Detected   | 680.9    | Detected   | 1229.1   | Detected   | 1320.8   | Detected   | AV356131      | 1.514157973 | 1.40903359 | 1.93978558 | 1.8051109 |
| A_51_P1990 | 89.1    | Detected   | 86.7     | Detected   | 147.4    | Detected   | 134.9    | Detected   | Zfp108        | 1.514029181 | 1.65432099 | 1.55594002 | 1.7001153 |
| A_55_P2093 | 57.8    | Detected   | 79.5     | Detected   | 147.4    | Detected   | 87.5     | Detected   | Myh7          | 1.51384083  | 2.55017301 | 1.10062893 | 1.8540881 |
| A_52_P9877 | 527.6   | Detected   | 135.1    | Detected   | 1018.7   | Detected   | 798.7    | Detected   | Ang4          | 1.51383624  | 1.9308188  | 5.9119171  | 7.5403405 |
| A_55_P2087 | 511     | Detected   | 734.5    | Detected   | 462.8    | Detected   | 773.5    | Detected   | Exoc8         | 1.51369863  | 0.90567515 | 1.05309735 | 0.6300885 |
| A_52_P3346 | 3112    | Detected   | 3209.3   | Detected   | 2438.2   | Detected   | 4710.6   | Detected   | Clock         | 1.513688946 | 0.78348329 | 1.46779672 | 0.7597295 |
| A_55_P2088 | 18.3    | Detected   | 59.5     | Detected   | 10.3     | Not Detect | 27.7     | Not Detect | Cyp27b1       | 1.513661202 | 0.56284153 | 0.46554622 | 0.1731092 |
| A_51_P4973 | 332.6   | Detected   | 338.8    | Detected   | 395.1    | Detected   | 503.4    | Detected   | Tcp11l2       | 1.513529765 | 1.18791341 | 1.48583235 | 1.1661747 |
| A_51_P2407 | 281.8   | Detected   | 375.9    | Detected   | 291.2    | Detected   | 426.5    | Detected   | 1700022A21Rik | 1.513484741 | 1.03335699 | 1.13461027 | 0.7746741 |
| A_55_P2030 | 22.6    | Detected   | 20.3     | Detected   | 20.1     | Detected   | 34.2     | Not Detect | Fan1          | 1.513274336 | 0.88938053 | 1.68472906 | 0.9901478 |
| A_51_P4032 | 10992.2 | Detected   | 9781.2   | Detected   | 12247.7  | Detected   | 16633.3  | Detected   | Tax1bp1       | 1.513191172 | 1.11421735 | 1.70053777 | 1.2521674 |
| A_55_P2002 | 94250.2 | Detected   | 111509.7 | Detected   | 149096.1 | Detected   | 142615.7 | Detected   | Atp5l         | 1.513160715 | 1.58191813 | 1.27895331 | 1.3370684 |
| A_55_P1959 | 15.2    | Detected   | 3.5      | Not Detect | 3.5      | Not Detect | 23       | Not Detect | Cst10         | 1.513157895 | 0.23026316 | 6.57142857 | 1         |
| A_52_P2442 | 10518.6 | Detected   | 11314.2  | Detected   | 8649.9   | Detected   | 15916.3  | Detected   | Ankrd11       | 1.513157645 | 0.82234328 | 1.40675434 | 0.7645172 |
| A_55_P1999 | 52041.2 | Detected   | 84342.5  | Detected   | 56167.8  | Detected   | 78745.9  | Detected   | Nutf2         | 1.513145354 | 1.07929487 | 0.93364437 | 0.665949  |
| A_51_P2170 | 2167.1  | Detected   | 3066.1   | Detected   | 2124.7   | Detected   | 3279     | Detected   | Gng10         | 1.513081999 | 0.98043468 | 1.06943674 | 0.692965  |
| A_55_P2123 | 30.6    | Detected   | 24.5     | Detected   | 13.5     | Not Detect | 46.3     | Detected   | Plekhn1       | 1.513071895 | 0.44117647 | 1.88979592 | 0.5510204 |
| A_55_P1952 | 1168.2  | Detected   | 1270     | Detected   | 1077     | Detected   | 1767.5   | Detected   | Sh3rf1        | 1.513011471 | 0.92193118 | 1.39173228 | 0.8480315 |
| A_66_P1110 | 31      | Detected   | 40.7     | Detected   | 29.1     | Detected   | 46.9     | Not Detect | Nlrp6         | 1.512903226 | 0.93870968 | 1.15233415 | 0.7149877 |
| A_55_P2116 | 62.2    | Detected   | 55       | Detected   | 80.6     | Detected   | 94.1     | Detected   | Gfm1          | 1.512861736 | 1.29581994 | 1.71090909 | 1.4654545 |
| A_55_P2171 | 11.7    | Not Detect | 45.7     | Detected   | 104.3    | Detected   | 17.7     | Not Detect | Pdzk1ip1      | 1.512820513 | 8.91452991 | 0.38730853 | 2.2822757 |
| A_66_P1393 | 417.4   | Detected   | 466.9    | Detected   | 497.7    | Detected   | 631.4    | Detected   | Atf6          | 1.512697652 | 1.19238141 | 1.35232384 | 1.065967  |
| A_52_P3111 | 13287.3 | Detected   | 18199.9  | Detected   | 13069.1  | Detected   | 20094.2  | Detected   | Brd7          | 1.512286168 | 0.9835783  | 1.10408299 | 0.7180864 |
| A_55_P2084 | 1958.5  | Detected   | 3097     | Detected   | 2118.6   | Detected   | 2961.4   | Detected   | Gm9047        | 1.512075568 | 1.08174623 | 0.95621569 | 0.6840814 |
| A_55_P2003 | 4421.8  | Detected   | 4136.1   | Detected   | 6337.9   | Detected   | 6685.4   | Detected   | Tmem143       | 1.511918223 | 1.43333032 | 1.61635357 | 1.5323372 |

|            |         |            |         |            |         |            |         |            |               |             |            |            |           |
|------------|---------|------------|---------|------------|---------|------------|---------|------------|---------------|-------------|------------|------------|-----------|
| A_52_P3191 | 2230.6  | Detected   | 2263    | Detected   | 2376.2  | Detected   | 3372.4  | Detected   | Vps13b        | 1.511880212 | 1.06527392 | 1.4902342  | 1.0500221 |
| A_55_P2112 | 303.2   | Detected   | 469     | Detected   | 254.3   | Detected   | 458.4   | Detected   | Sipa111       | 1.511873351 | 0.83872032 | 0.97739872 | 0.5422175 |
| A_55_P2091 | 67.4    | Detected   | 77.3    | Detected   | 53.4    | Detected   | 101.9   | Detected   | Ublcp1        | 1.511869436 | 0.79228487 | 1.31824062 | 0.690815  |
| A_55_P2387 | 46.7    | Detected   | 33.6    | Detected   | 15.2    | Not Detect | 70.6    | Detected   | 4933412L11Rik | 1.511777302 | 0.3254818  | 2.10119048 | 0.452381  |
| A_55_P2051 | 725.2   | Detected   | 799     | Detected   | 786.9   | Detected   | 1096.3  | Detected   | Zfp568        | 1.511720905 | 1.08507998 | 1.37209011 | 0.9848561 |
| A_55_P1990 | 90.7    | Detected   | 97.2    | Detected   | 100     | Detected   | 137.1   | Detected   | Pikfyve       | 1.511576626 | 1.10253583 | 1.41049383 | 1.0288066 |
| A_55_P2136 | 716.7   | Detected   | 751.7   | Detected   | 663.6   | Detected   | 1083.3  | Detected   | Camta2        | 1.511511093 | 0.92591042 | 1.44113343 | 0.882799  |
| A_52_P4428 | 204.7   | Detected   | 179.2   | Detected   | 217.5   | Detected   | 309.4   | Detected   | Kbtbd7        | 1.511480215 | 1.06253053 | 1.7265625  | 1.2137277 |
| A_51_P4003 | 17.6    | Detected   | 76      | Detected   | 5.5     | Not Detect | 26.6    | Not Detect | Rhbg          | 1.511363636 | 0.3125     | 0.35       | 0.0723684 |
| A_66_P1019 | 168     | Detected   | 187.1   | Detected   | 128.6   | Detected   | 253.9   | Detected   | Lce1k         | 1.511309524 | 0.76547619 | 1.35702833 | 0.687333  |
| A_55_P2042 | 459.4   | Detected   | 444.9   | Detected   | 480.2   | Detected   | 694.2   | Detected   | Zcchc4        | 1.511101437 | 1.04527645 | 1.56035064 | 1.0793437 |
| A_51_P3275 | 13673.8 | Detected   | 13490   | Detected   | 21010.1 | Detected   | 20653.6 | Detected   | Fam96a        | 1.510450643 | 1.5365224  | 1.53103039 | 1.5574574 |
| A_55_P2053 | 19.6    | Detected   | 24.9    | Detected   | 26.6    | Detected   | 29.6    | Not Detect | Iqcf4         | 1.510204082 | 1.35714286 | 1.18875502 | 1.0682731 |
| A_52_P6039 | 16357.3 | Detected   | 20957.9 | Detected   | 20290.1 | Detected   | 24702.6 | Detected   | Jtb           | 1.510188112 | 1.24043088 | 1.17867725 | 0.9681361 |
| A_55_P2126 | 292.3   | Detected   | 317.5   | Detected   | 235.5   | Detected   | 441.4   | Detected   | Slc35e2       | 1.510092371 | 0.8056791  | 1.39023622 | 0.7417323 |
| A_55_P1998 | 10      | Not Detect | 9.9     | Not Detect | 17.7    | Detected   | 15.1    | Not Detect | DXBay18       | 1.51        | 1.77       | 1.52525253 | 1.7878788 |
| A_55_P1965 | 1149.7  | Detected   | 2619.1  | Detected   | 1022.7  | Detected   | 1736    | Detected   | Ccdc66        | 1.50995912  | 0.8895364  | 0.66282311 | 0.3904776 |
| A_52_P4327 | 2444.4  | Detected   | 2046.6  | Detected   | 4449.8  | Detected   | 3690.3  | Detected   | Mrpl50        | 1.509695631 | 1.82040583 | 1.80313691 | 2.1742402 |
| A_51_P1908 | 5422.5  | Detected   | 5113.2  | Detected   | 4976.6  | Detected   | 8186    | Detected   | Ankrd13a      | 1.509635777 | 0.91776856 | 1.60095439 | 0.9732848 |
| A_52_P3088 | 176.3   | Detected   | 191.7   | Detected   | 217.8   | Detected   | 266.1   | Detected   | Apobec3       | 1.509359047 | 1.23539421 | 1.38810642 | 1.1361502 |
| A_52_P1808 | 4481.8  | Detected   | 4790.9  | Detected   | 5176.3  | Detected   | 6762.4  | Detected   | Tmem206       | 1.508858048 | 1.15496006 | 1.41150932 | 1.0804442 |
| A_52_P2441 | 39352.3 | Detected   | 35149.1 | Detected   | 29098.8 | Detected   | 59371.5 | Detected   | Cd24a         | 1.508717407 | 0.73944344 | 1.68913287 | 0.8278676 |
| A_55_P2390 | 40.7    | Detected   | 33.7    | Detected   | 40.9    | Detected   | 61.4    | Detected   | 5031420N21Rik | 1.508599509 | 1.004914   | 1.82195846 | 1.2136499 |
| A_52_P3516 | 2011.1  | Detected   | 2303.5  | Detected   | 2987.9  | Detected   | 3033.4  | Detected   | Gcc2          | 1.508328775 | 1.48570434 | 1.31686564 | 1.2971131 |
| A_51_P3321 | 3941.3  | Detected   | 2032.2  | Detected   | 4256.2  | Detected   | 5943.6  | Detected   | Cln2          | 1.508030345 | 1.0798975  | 2.92471213 | 2.0943805 |
| A_51_P1015 | 927.2   | Detected   | 2261.3  | Detected   | 3129.4  | Detected   | 1398.1  | Detected   | Hgfac         | 1.507873167 | 3.37510785 | 0.61827268 | 1.3838942 |
| A_52_P1365 | 26.2    | Detected   | 22.8    | Detected   | 13.9    | Not Detect | 39.5    | Not Detect | Zfp775        | 1.507633588 | 0.53053435 | 1.73245614 | 0.6096491 |
| A_51_P1659 | 19443.3 | Detected   | 26637   | Detected   | 25113.7 | Detected   | 29312.6 | Detected   | Phb           | 1.507593876 | 1.29163774 | 1.10044675 | 0.9428126 |
| A_55_P2382 | 484.1   | Detected   | 532     | Detected   | 528.3   | Detected   | 729.8   | Detected   | 4930593A02Rik | 1.507539765 | 1.09130345 | 1.37180451 | 0.9930451 |
| A_55_P2156 | 67.8    | Detected   | 58.1    | Detected   | 65.9    | Detected   | 102.2   | Detected   | Gm3146        | 1.507374631 | 0.9719764  | 1.75903614 | 1.1342513 |
| A_55_P2114 | 2300.5  | Detected   | 2320.1  | Detected   | 2265.2  | Detected   | 3467.6  | Detected   | Ddx46         | 1.507324495 | 0.98465551 | 1.49459075 | 0.9763372 |
| A_55_P2008 | 12477.2 | Detected   | 17554.4 | Detected   | 12980.4 | Detected   | 18807   | Detected   | Rps6          | 1.507309332 | 1.04032956 | 1.07135533 | 0.7394385 |
| A_55_P2132 | 1567.4  | Detected   | 1482.3  | Detected   | 2241.9  | Detected   | 2362.5  | Detected   | Sdcbp         | 1.507273191 | 1.43033048 | 1.59380692 | 1.5124469 |
| A_52_P1416 | 42.2    | Detected   | 28.6    | Detected   | 276.3   | Detected   | 63.6    | Detected   | Gpr3711       | 1.507109005 | 6.54739336 | 2.22377622 | 9.6608392 |
| A_55_P2147 | 21.3    | Detected   | 22.2    | Detected   | 19.9    | Detected   | 32.1    | Not Detect | Ercc5         | 1.507042254 | 0.9342723  | 1.44594595 | 0.8963964 |
| A_55_P1971 | 2751.9  | Detected   | 1578.9  | Detected   | 3124    | Detected   | 4147.2  | Detected   | Cln2          | 1.507031506 | 1.13521567 | 2.6266388  | 1.9785927 |
| A_55_P2048 | 561.2   | Detected   | 396.3   | Detected   | 536.1   | Detected   | 845.7   | Detected   | Slc44a1       | 1.506949394 | 0.95527441 | 2.1339894  | 1.3527631 |
| A_51_P3836 | 2304.2  | Detected   | 3013.3  | Detected   | 1999.1  | Detected   | 3472.1  | Detected   | Vps4a         | 1.506857044 | 0.86758962 | 1.15225832 | 0.6634255 |
| A_51_P2826 | 6534.9  | Detected   | 3825.9  | Detected   | 7062.3  | Detected   | 9847.1  | Detected   | Hexa          | 1.506847848 | 1.08070514 | 2.57379963 | 1.8459186 |
| A_66_P1324 | 573.2   | Detected   | 773.7   | Detected   | 736     | Detected   | 863.7   | Detected   | Usp15         | 1.506803908 | 1.28401954 | 1.11632416 | 0.9512731 |

|            |         |            |         |            |         |            |         |            |          |             |            |            |           |
|------------|---------|------------|---------|------------|---------|------------|---------|------------|----------|-------------|------------|------------|-----------|
| A_52_P6741 | 147.4   | Detected   | 145     | Detected   | 169.5   | Detected   | 222.1   | Detected   | Rsbn11   | 1.506784261 | 1.14993216 | 1.53172414 | 1.1689655 |
| A_55_P1991 | 4559.1  | Detected   | 5459.4  | Detected   | 7496.3  | Detected   | 6868.2  | Detected   | Lmf1     | 1.506481542 | 1.64424996 | 1.25805034 | 1.3730996 |
| A_55_P2108 | 226.1   | Detected   | 248.9   | Detected   | 185.6   | Detected   | 340.6   | Detected   | Med12    | 1.506413092 | 0.82087572 | 1.36842105 | 0.745681  |
| A_55_P2047 | 2736.6  | Detected   | 2867.9  | Detected   | 3733.2  | Detected   | 4121.7  | Detected   | Cyb5r4   | 1.506139005 | 1.36417452 | 1.437184   | 1.301719  |
| A_55_P2166 | 35775   | Detected   | 35906.8 | Detected   | 46594.7 | Detected   | 53876.3 | Detected   | Pam16    | 1.50597624  | 1.30243746 | 1.50044838 | 1.2976567 |
| A_55_P1997 | 119     | Detected   | 118.8   | Detected   | 125.9   | Detected   | 179.2   | Detected   | Gm4850   | 1.505882353 | 1.05798319 | 1.50841751 | 1.0597643 |
| A_55_P2347 | 93.9    | Detected   | 144.8   | Detected   | 109.2   | Detected   | 141.4   | Detected   | AI662501 | 1.505857295 | 1.1629393  | 0.97651934 | 0.7541436 |
| A_55_P2079 | 23609   | Detected   | 17479.5 | Detected   | 17945.6 | Detected   | 35550.6 | Detected   | Mpp1     | 1.505807107 | 0.7601169  | 2.03384536 | 1.0266655 |
| A_51_P2410 | 11017.9 | Detected   | 14626.7 | Detected   | 14497.6 | Detected   | 16588.9 | Detected   | Map2k1   | 1.505631745 | 1.31582243 | 1.13415193 | 0.9911737 |
| A_55_P2155 | 8.9     | Not Detect | 19.4    | Detected   | 14.4    | Not Detect | 13.4    | Not Detect | Gm16501  | 1.505617978 | 1.61797753 | 0.69072165 | 0.742268  |
| A_55_P2041 | 18.4    | Detected   | 23.9    | Detected   | 30      | Detected   | 27.7    | Not Detect | Gm10002  | 1.505434783 | 1.63043478 | 1.15899582 | 1.2552301 |
| A_55_P2031 | 293.5   | Detected   | 661.9   | Detected   | 54      | Detected   | 441.8   | Detected   | Zfpm2    | 1.50528109  | 0.18398637 | 0.66747243 | 0.0815833 |
| A_55_P2025 | 5676.7  | Detected   | 6459.6  | Detected   | 6539.8  | Detected   | 8544.6  | Detected   | Trabd    | 1.505205489 | 1.15204256 | 1.3227754  | 1.0124156 |
| A_55_P2057 | 8581.6  | Detected   | 7309.3  | Detected   | 11740   | Detected   | 12913.7 | Detected   | Mif4gd   | 1.504812622 | 1.36804326 | 1.76674921 | 1.606173  |
| A_51_P1108 | 9786.1  | Detected   | 12956.4 | Detected   | 13499.9 | Detected   | 14725.8 | Detected   | Mrps35   | 1.504766965 | 1.37949745 | 1.13656571 | 1.0419484 |
| A_66_P1154 | 504.2   | Detected   | 724.2   | Detected   | 1121.8  | Detected   | 758.7   | Detected   | Sfta2    | 1.504760016 | 2.22491075 | 1.04763877 | 1.5490196 |
| A_55_P1986 | 8641.9  | Detected   | 8447.9  | Detected   | 11528.9 | Detected   | 13003.5 | Detected   | Tmem41b  | 1.504703827 | 1.33407005 | 1.53925828 | 1.364706  |
| A_55_P2003 | 255.3   | Detected   | 265.1   | Detected   | 240.1   | Detected   | 384.1   | Detected   | Wwp1     | 1.504504505 | 0.9404622  | 1.44888721 | 0.905696  |
| A_55_P2131 | 7006.1  | Detected   | 6287.1  | Detected   | 8729.7  | Detected   | 10540.3 | Detected   | Sphk2    | 1.504446126 | 1.24601419 | 1.67649632 | 1.3885098 |
| A_55_P2103 | 73.2    | Detected   | 70.5    | Detected   | 64.6    | Detected   | 110.1   | Detected   | Gm9876   | 1.504098361 | 0.88251366 | 1.56170213 | 0.9163121 |
| A_66_P1374 | 14006.5 | Detected   | 14155   | Detected   | 15378.2 | Detected   | 21066.8 | Detected   | Dnajb14  | 1.504073109 | 1.0979331  | 1.48829389 | 1.0864147 |
| A_55_P2277 | 15132.1 | Detected   | 13889.8 | Detected   | 13475.9 | Detected   | 22758.9 | Detected   | AA522020 | 1.504014644 | 0.89055055 | 1.63853331 | 0.9702012 |
| A_55_P1987 | 24985   | Detected   | 27944.7 | Detected   | 26390.8 | Detected   | 37571.6 | Detected   | Pgm2     | 1.50376626  | 1.05626576 | 1.34449824 | 0.9443937 |
| A_55_P2048 | 65328.6 | Detected   | 73757.4 | Detected   | 98393   | Detected   | 98238.7 | Detected   | Atp5l    | 1.503762517 | 1.50612442 | 1.33191653 | 1.3340085 |
| A_55_P2064 | 561.5   | Detected   | 712.6   | Detected   | 623.8   | Detected   | 844.3   | Detected   | Gm10624  | 1.503650935 | 1.1109528  | 1.18481617 | 0.8753859 |
| A_51_P3598 | 13.7    | Detected   | 7.1     | Not Detect | 3.2     | Not Detect | 20.6    | Not Detect | Glec11a  | 1.503649635 | 0.23357664 | 2.90140845 | 0.4507042 |
| A_55_P2018 | 84.4    | Detected   | 124.2   | Detected   | 123.4   | Detected   | 126.9   | Detected   | Defa-rs7 | 1.503554502 | 1.46208531 | 1.02173913 | 0.9935588 |
| A_52_P4188 | 127.7   | Detected   | 148.4   | Detected   | 152.2   | Detected   | 192     | Detected   | Pmch     | 1.503523884 | 1.19185591 | 1.29380054 | 1.0256065 |
| A_55_P2060 | 56476.4 | Detected   | 62731.2 | Detected   | 62716.4 | Detected   | 84904   | Detected   | Lamt0r3  | 1.503353613 | 1.11048863 | 1.35345729 | 0.9997641 |
| A_55_P2117 | 3138.9  | Detected   | 3404.6  | Detected   | 3686.5  | Detected   | 4718.6  | Detected   | Rnf115   | 1.503265475 | 1.17445602 | 1.38594842 | 1.0827997 |
| A_55_P2041 | 54962.3 | Detected   | 109863  | Detected   | 56163.6 | Detected   | 82605.4 | Detected   | Tom20    | 1.502946565 | 1.0218568  | 0.75189463 | 0.5112149 |
| A_52_P6117 | 8768.6  | Detected   | 11329.6 | Detected   | 10595.2 | Detected   | 13177.2 | Detected   | Ddx5     | 1.502771252 | 1.20831148 | 1.16307725 | 0.9351786 |
| A_51_P4199 | 11979.1 | Detected   | 11982.4 | Detected   | 11806.1 | Detected   | 17999.9 | Detected   | Tmem106b | 1.50260871  | 0.98555818 | 1.50219489 | 0.9852868 |
| A_55_P2417 | 1109.2  | Detected   | 1085.2  | Detected   | 1079.7  | Detected   | 1666.4  | Detected   | AU024581 | 1.502344032 | 0.97340426 | 1.53556948 | 0.9949318 |
| A_51_P3920 | 2809.1  | Detected   | 3057.4  | Detected   | 3572.2  | Detected   | 4220.1  | Detected   | Tmem19   | 1.502296109 | 1.27165284 | 1.38029044 | 1.1683784 |
| A_51_P3339 | 1077.7  | Detected   | 1351    | Detected   | 1517.6  | Detected   | 1619    | Detected   | Cisd2    | 1.50227336  | 1.4081841  | 1.19837158 | 1.1233161 |
| A_66_P1221 | 1222.4  | Detected   | 1300.6  | Detected   | 1502.1  | Detected   | 1836.3  | Detected   | Pisd-ps3 | 1.50220877  | 1.22881217 | 1.41188682 | 1.1549285 |
| A_55_P2024 | 2000.8  | Detected   | 1527.4  | Detected   | 3058.1  | Detected   | 3005.6  | Detected   | Fam149a  | 1.50219912  | 1.52843862 | 1.9677884  | 2.0021605 |
| A_52_P4754 | 551.2   | Detected   | 677.9   | Detected   | 470.7   | Detected   | 828     | Detected   | Rbm48    | 1.502177068 | 0.85395501 | 1.22141909 | 0.6943502 |
| A_52_P4958 | 621.7   | Detected   | 1115.2  | Detected   | 185     | Detected   | 933.9   | Detected   | Mafb     | 1.502171465 | 0.29757118 | 0.83742826 | 0.1658895 |

|            |                  |                  |                  |                  |               |             |            |            |           |
|------------|------------------|------------------|------------------|------------------|---------------|-------------|------------|------------|-----------|
| A_55_P1979 | 23.5 Detected    | 12.3 Not Detect  | 74.7 Detected    | 35.3 Not Detect  | Tuba3a        | 1.50212766  | 3.1787234  | 2.8699187  | 6.0731707 |
| A_55_P1977 | 4198.4 Detected  | 4208.1 Detected  | 4594 Detected    | 6304.9 Detected  | 4933426M11Rik | 1.501738758 | 1.09422637 | 1.49827713 | 1.0917041 |
| A_51_P3968 | 4119.9 Detected  | 4892.1 Detected  | 3969.3 Detected  | 6186.7 Detected  | 2810428115Rik | 1.501662662 | 0.96344571 | 1.26463073 | 0.8113694 |
| A_55_P1969 | 3911.6 Detected  | 4446.9 Detected  | 6394.6 Detected  | 5873.2 Detected  | Pex26         | 1.501482769 | 1.63477861 | 1.32074029 | 1.4379905 |
| A_66_P1270 | 38.9 Detected    | 48.5 Detected    | 61.7 Detected    | 58.4 Detected    | Iqck          | 1.501285347 | 1.58611825 | 1.20412371 | 1.2721649 |
| A_55_P2133 | 2139.4 Detected  | 2684.7 Detected  | 2689.1 Detected  | 3211.7 Detected  | Ap4b1         | 1.501215294 | 1.2569412  | 1.19629754 | 1.0016389 |
| A_51_P3105 | 204 Detected     | 252.5 Detected   | 243.4 Detected   | 306.2 Detected   | Smim8         | 1.500980392 | 1.19313725 | 1.21267327 | 0.9639604 |
| A_55_P1962 | 10288.9 Detected | 14532 Detected   | 12563.1 Detected | 15443.4 Detected | Churc1        | 1.500976781 | 1.22103432 | 1.06271676 | 0.8645128 |
| A_55_P2060 | 3029.9 Detected  | 3619.1 Detected  | 2409.6 Detected  | 4547.8 Detected  | Whsc111       | 1.500973629 | 0.79527377 | 1.25661076 | 0.6658009 |
| A_51_P1037 | 3333.4 Detected  | 3159.3 Detected  | 4090.6 Detected  | 5003 Detected    | Sft2d2        | 1.500869983 | 1.22715546 | 1.58357864 | 1.2947805 |
| A_55_P1967 | 486.8 Detected   | 820.1 Detected   | 525.7 Detected   | 730.6 Detected   | Sf3b3         | 1.500821693 | 1.07990961 | 0.89086697 | 0.6410194 |
| A_55_P1974 | 1302.2 Detected  | 1826.5 Detected  | 1308.7 Detected  | 1954.3 Detected  | Zfp868        | 1.500767931 | 1.00499155 | 1.06996989 | 0.716507  |
| A_55_P1983 | 371.8 Detected   | 423.1 Detected   | 432.4 Detected   | 557.9 Detected   | Cflar         | 1.500537924 | 1.16299086 | 1.3186008  | 1.0219806 |
| A_55_P2028 | 4483.9 Detected  | 4295.7 Detected  | 5006.6 Detected  | 6727.4 Detected  | Slc31a1       | 1.500345681 | 1.11657263 | 1.56607771 | 1.1654911 |
| A_51_P2066 | 9310.4 Detected  | 11638.4 Detected | 9851 Detected    | 13968.4 Detected | Lsm1          | 1.500300739 | 1.0580641  | 1.20019934 | 0.8464222 |
| A_55_P2392 | 604.2 Detected   | 446.7 Detected   | 872.3 Detected   | 906.4 Detected   | K230015D01Rik | 1.500165508 | 1.44372724 | 2.02910231 | 1.9527647 |
| A_55_P1991 | 57.8 Detected    | 53.2 Detected    | 75.5 Detected    | 86.7 Detected    | Gm5431        | 1.5         | 1.30622837 | 1.62969925 | 1.4191729 |
| A_55_P1960 | 11.2 Not Detect  | 11.6 Not Detect  | 17.3 Detected    | 16.8 Not Detect  | Gm10789       | 1.5         | 1.54464286 | 1.44827586 | 1.4913793 |
| A_66_P1332 | 23 Detected      | 23.5 Detected    | 29.4 Detected    | 34.5 Not Detect  | Hesx1         | 1.5         | 1.27826087 | 1.46808511 | 1.2510638 |
| A_55_P2141 | 14.6 Detected    | 19.6 Detected    | 23.6 Detected    | 21.9 Not Detect  | Ighv5-12      | 1.5         | 1.61643836 | 1.11734694 | 1.2040816 |
| A_55_P2059 | 6.4 Not Detect   | 22.4 Detected    | 5.3 Not Detect   | 9.6 Not Detect   | Igsf1         | 1.5         | 0.828125   | 0.42857143 | 0.2366071 |
| A_51_P4799 | 10931.1 Detected | 12915.4 Detected | 14552.7 Detected | 16395.6 Detected | Mars          | 1.499903944 | 1.33131158 | 1.26946126 | 1.1267711 |
| A_55_P2122 | 1388.1 Detected  | 1771.1 Detected  | 1207.2 Detected  | 2081.9 Detected  | Airn          | 1.499819898 | 0.86967798 | 1.17548416 | 0.6816103 |
| A_55_P1963 | 13461 Detected   | 14746.7 Detected | 13736.8 Detected | 20187.8 Detected | Klhdc7a       | 1.499725132 | 1.02048882 | 1.36897068 | 0.9315169 |
| A_55_P2057 | 8548.1 Detected  | 5591 Detected    | 13718.5 Detected | 12815.9 Detected | Cdc42ep5      | 1.499268843 | 1.60485956 | 2.29223752 | 2.4536755 |
| A_55_P2115 | 370.8 Detected   | 408.6 Detected   | 488.8 Detected   | 555.9 Detected   | Alg12         | 1.499190939 | 1.31823085 | 1.36049927 | 1.19628   |
| A_55_P2141 | 5888.5 Detected  | 6192.5 Detected  | 7859.7 Detected  | 8827.5 Detected  | Synj2bp       | 1.499108432 | 1.33475418 | 1.42551474 | 1.2692289 |
| A_51_P3990 | 659 Detected     | 707.8 Detected   | 878.3 Detected   | 987.9 Detected   | Anp32a        | 1.49908953  | 1.33277693 | 1.39573326 | 1.2408873 |
| A_55_P1959 | 44.9 Detected    | 71.5 Detected    | 55.6 Detected    | 67.3 Detected    | Cox16         | 1.498886414 | 1.23830735 | 0.94125874 | 0.7776224 |
| A_51_P4042 | 16224.8 Detected | 20136.7 Detected | 15444.5 Detected | 24314.6 Detected | Atp6v0b       | 1.498607071 | 0.95190696 | 1.2074769  | 0.7669827 |
| A_55_P2093 | 8877.7 Detected  | 11300.1 Detected | 11024.9 Detected | 13303.7 Detected | Ufm1          | 1.498552553 | 1.24186445 | 1.17730817 | 0.9756462 |
| A_55_P1953 | 131.4 Detected   | 177.3 Detected   | 140.4 Detected   | 196.9 Detected   | Wfdc3         | 1.49847793  | 1.06849315 | 1.1105471  | 0.7918782 |
| A_51_P3708 | 14828.9 Detected | 23618.9 Detected | 14310.9 Detected | 22218.4 Detected | Ccdc124       | 1.498317475 | 0.96506821 | 0.94070427 | 0.6059088 |
| A_51_P3490 | 8231.4 Detected  | 10393.7 Detected | 15116.8 Detected | 12333.1 Detected | Lsm3          | 1.498299196 | 1.83647982 | 1.1865938  | 1.4544195 |
| A_55_P1989 | 22991.5 Detected | 20286.5 Detected | 33602.3 Detected | 34448.1 Detected | Rnf181        | 1.498297197 | 1.46150969 | 1.69808    | 1.6563873 |
| A_55_P1952 | 13887.8 Detected | 11432.4 Detected | 23016.4 Detected | 20807.3 Detected | Gtf2a2        | 1.498243062 | 1.65731073 | 1.82002904 | 2.0132606 |
| A_55_P2250 | 1755.7 Detected  | 2033.9 Detected  | 2050.1 Detected  | 2630.2 Detected  | 9530029O12Rik | 1.498091929 | 1.16768241 | 1.29318059 | 1.007965  |
| A_55_P2083 | 809.4 Detected   | 680.4 Detected   | 705.6 Detected   | 1212.5 Detected  | Tle2          | 1.498023227 | 0.87175686 | 1.78203998 | 1.037037  |
| A_55_P1987 | 173.7 Detected   | 216.7 Detected   | 153.8 Detected   | 260.2 Detected   | Atg2b         | 1.497985032 | 0.88543466 | 1.20073835 | 0.709737  |
| A_55_P2015 | 140.8 Detected   | 214.9 Detected   | 171 Detected     | 210.9 Detected   | Zfp961        | 1.497869318 | 1.21448864 | 0.98138669 | 0.7957189 |

|            |                  |                  |                  |                  |               |             |            |            |           |
|------------|------------------|------------------|------------------|------------------|---------------|-------------|------------|------------|-----------|
| A_52_P6252 | 22.5 Detected    | 20.1 Detected    | 19.8 Detected    | 33.7 Not Detect  | 1700024G13Rik | 1.497777778 | 0.88       | 1.67661692 | 0.9850746 |
| A_55_P2122 | 888.5 Detected   | 584 Detected     | 788.9 Detected   | 1330.5 Detected  | Ssfa2         | 1.497467642 | 0.88790096 | 2.27825342 | 1.3508562 |
| A_51_P4818 | 2009.5 Detected  | 2909.8 Detected  | 2155.8 Detected  | 3009.1 Detected  | Rabggta       | 1.497437173 | 1.07280418 | 1.03412606 | 0.7408757 |
| A_55_P2033 | 57.3 Detected    | 27.8 Detected    | 67.3 Detected    | 85.8 Detected    | Tnfrsf1b      | 1.497382199 | 1.17452007 | 3.08633094 | 2.4208633 |
| A_51_P4756 | 37.2 Detected    | 34.1 Detected    | 26.5 Detected    | 55.7 Detected    | Paqr6         | 1.497311828 | 0.71236559 | 1.63343109 | 0.7771261 |
| A_52_P1226 | 1201.9 Detected  | 1472.1 Detected  | 1226 Detected    | 1799.6 Detected  | Cep41         | 1.497295948 | 1.02005158 | 1.2224713  | 0.8328239 |
| A_51_P3440 | 3339.6 Detected  | 4870.1 Detected  | 4164.5 Detected  | 5000.3 Detected  | Nt5m          | 1.497275123 | 1.24700563 | 1.02673456 | 0.8551159 |
| A_51_P2941 | 453.7 Detected   | 414.9 Detected   | 430.2 Detected   | 679.3 Detected   | Chd2          | 1.497244875 | 0.94820366 | 1.63726199 | 1.0368764 |
| A_55_P2423 | 348.5 Detected   | 430.8 Detected   | 348.6 Detected   | 521.7 Detected   | AI464196      | 1.496987088 | 1.00028694 | 1.21100279 | 0.8091922 |
| A_51_P4253 | 4246.3 Detected  | 4020 Detected    | 4450.3 Detected  | 6356.5 Detected  | Smg9          | 1.496950286 | 1.04804182 | 1.58121891 | 1.1070398 |
| A_55_P2083 | 14734.5 Detected | 21563.4 Detected | 15867.4 Detected | 22056.2 Detected | Atp13a1       | 1.496908616 | 1.07688758 | 1.02285354 | 0.7358487 |
| A_55_P2209 | 31.4 Detected    | 58.8 Detected    | 43.6 Detected    | 47 Detected      | B430105A11Rik | 1.496815287 | 1.38853503 | 0.79931973 | 0.7414966 |
| A_51_P2020 | 9282.8 Detected  | 9934.6 Detected  | 9824.5 Detected  | 13894.6 Detected | Taf12         | 1.496811307 | 1.05835524 | 1.39860689 | 0.9889175 |
| A_51_P4363 | 324.3 Detected   | 327.9 Detected   | 9.7 Not Detect   | 485.4 Detected   | Hoxb5         | 1.496762257 | 0.02991058 | 1.48032937 | 0.0295822 |
| A_51_P3981 | 2217.5 Detected  | 2371.6 Detected  | 1688.6 Detected  | 3318.4 Detected  | Klhl2         | 1.496459977 | 0.76148816 | 1.39922415 | 0.7120088 |
| A_55_P2185 | 68.9 Detected    | 76.8 Detected    | 87.7 Detected    | 103.1 Detected   | Cage1         | 1.496371553 | 1.27285922 | 1.34244792 | 1.1419271 |
| A_55_P2173 | 51.8 Detected    | 48.6 Detected    | 43.3 Detected    | 77.5 Detected    | Samd3         | 1.496138996 | 0.83590734 | 1.59465021 | 0.8909465 |
| A_52_P4419 | 7043.6 Detected  | 7294.2 Detected  | 4088 Detected    | 10537.1 Detected | Evc2          | 1.495982168 | 0.58038503 | 1.44458611 | 0.5604453 |
| A_55_P2044 | 21735 Detected   | 22534.9 Detected | 27259.8 Detected | 32513.3 Detected | 1810037117Rik | 1.49589602  | 1.2541891  | 1.44279762 | 1.2096703 |
| A_55_P2183 | 5667.4 Detected  | 4148.3 Detected  | 7422.5 Detected  | 8476.9 Detected  | P2rx4         | 1.495729964 | 1.30968345 | 2.04346359 | 1.7892872 |
| A_51_P3102 | 944.1 Detected   | 1243.5 Detected  | 845 Detected     | 1412.1 Detected  | Fam118a       | 1.4957102   | 0.89503231 | 1.13558504 | 0.6795336 |
| A_55_P2076 | 3822 Detected    | 5411.6 Detected  | 4344.6 Detected  | 5716.4 Detected  | Ints10        | 1.495656724 | 1.13673469 | 1.05632345 | 0.802831  |
| A_55_P1956 | 1327.5 Detected  | 1483.2 Detected  | 1577.1 Detected  | 1985.3 Detected  | Ttc5          | 1.495517891 | 1.1880226  | 1.33852481 | 1.0633091 |
| A_51_P3582 | 1392.4 Detected  | 1494.2 Detected  | 2033 Detected    | 2082.3 Detected  | Tstd3         | 1.495475438 | 1.46006895 | 1.39358854 | 1.3605943 |
| A_55_P2158 | 21.8 Detected    | 24.4 Detected    | 26 Detected      | 32.6 Not Detect  | Olfcr39       | 1.495412844 | 1.19266055 | 1.33606557 | 1.0655738 |
| A_55_P2042 | 14013.9 Detected | 18180 Detected   | 11193.2 Detected | 20956.3 Detected | Acd           | 1.495393859 | 0.79872127 | 1.15271177 | 0.6156876 |
| A_55_P2080 | 649.3 Detected   | 624.1 Detected   | 517.7 Detected   | 970.9 Detected   | Zfp691        | 1.495302634 | 0.79732019 | 1.55568018 | 0.8295145 |
| A_52_P6456 | 144.8 Detected   | 145.6 Detected   | 209.9 Detected   | 216.5 Detected   | Senp8         | 1.495165746 | 1.44958564 | 1.48695055 | 1.4416209 |
| A_55_P2159 | 4695 Detected    | 4032 Detected    | 4024.4 Detected  | 7019.7 Detected  | Herc1         | 1.49514377  | 0.8571672  | 1.74099702 | 0.9981151 |
| A_55_P2020 | 19.8 Detected    | 22.2 Detected    | 24.2 Detected    | 29.6 Not Detect  | Sgca          | 1.494949495 | 1.22222222 | 1.33333333 | 1.0900901 |
| A_55_P2069 | 57.6 Detected    | 49.2 Detected    | 59.8 Detected    | 86.1 Detected    | N6amt1        | 1.494791667 | 1.03819444 | 1.75       | 1.2154472 |
| A_55_P2097 | 220.1 Detected   | 305 Detected     | 239.5 Detected   | 329 Detected     | Itga10        | 1.494775102 | 1.08814175 | 1.07868852 | 0.7852459 |
| A_51_P3404 | 4908.9 Detected  | 5594.3 Detected  | 6349.1 Detected  | 7337.6 Detected  | Eefsec        | 1.494754426 | 1.29338548 | 1.31162076 | 1.134923  |
| A_51_P3721 | 319.6 Detected   | 318.8 Detected   | 620.4 Detected   | 477.7 Detected   | Pnkd          | 1.494680851 | 1.94117647 | 1.49843162 | 1.9460477 |
| A_52_P1629 | 1065.9 Detected  | 786.4 Detected   | 2390.1 Detected  | 1593.1 Detected  | Frat2         | 1.494605498 | 2.24233042 | 2.02581384 | 3.039293  |
| A_51_P4871 | 9511 Detected    | 12087.1 Detected | 10743.7 Detected | 14214.9 Detected | Bud31         | 1.494574703 | 1.12960782 | 1.17603892 | 0.8888567 |
| A_51_P3486 | 252.4 Detected   | 375.9 Detected   | 327.7 Detected   | 377.2 Detected   | Zdhhc17       | 1.494453249 | 1.29833597 | 1.00345837 | 0.8717744 |
| A_55_P2079 | 2451.6 Detected  | 2616 Detected    | 1617.2 Detected  | 3663.8 Detected  | Ccdc68        | 1.494452602 | 0.65965084 | 1.40053517 | 0.6181957 |
| A_52_P4144 | 3992.5 Detected  | 4624 Detected    | 5171.8 Detected  | 5966.4 Detected  | Dcun1d1       | 1.494402004 | 1.29537884 | 1.29031142 | 1.1184689 |
| A_51_P2255 | 11273.3 Detected | 10380.7 Detected | 13148.4 Detected | 16846 Detected   | Pnrc2         | 1.494327304 | 1.16633107 | 1.62281927 | 1.2666198 |

|            |         |          |         |          |         |          |         |            |               |             |            |            |           |
|------------|---------|----------|---------|----------|---------|----------|---------|------------|---------------|-------------|------------|------------|-----------|
| A_55_P2000 | 3529.2  | Detected | 4256.6  | Detected | 4467.1  | Detected | 5272.9  | Detected   | Mthfd11       | 1.494077978 | 1.26575428 | 1.23875863 | 1.0494526 |
| A_66_P1242 | 33.4    | Detected | 25      | Detected | 29.8    | Detected | 49.9    | Not Detect | Gm9910        | 1.494011976 | 0.89221557 | 1.996      | 1.192     |
| A_51_P2681 | 949.4   | Detected | 821.3   | Detected | 1064.2  | Detected | 1418.2  | Detected   | Nat6          | 1.493785549 | 1.12091847 | 1.72677463 | 1.2957506 |
| A_51_P4575 | 36097.1 | Detected | 27643.2 | Detected | 46986.2 | Detected | 53920.8 | Detected   | Ccnb2         | 1.493770968 | 1.30166135 | 1.95059906 | 1.6997381 |
| A_55_P2207 | 54.3    | Detected | 88.5    | Detected | 39.9    | Detected | 81.1    | Detected   | LOC101056197  | 1.493554328 | 0.73480663 | 0.91638418 | 0.4508475 |
| A_51_P4465 | 1135.9  | Detected | 1242    | Detected | 1483.5  | Detected | 1696.4  | Detected   | 1810026J23Rik | 1.493441324 | 1.30601285 | 1.36586151 | 1.1944444 |
| A_55_P1986 | 486.4   | Detected | 682.6   | Detected | 466.8   | Detected | 726.4   | Detected   | Card6         | 1.493421053 | 0.95970395 | 1.06416642 | 0.6838558 |
| A_55_P1961 | 256     | Detected | 245.8   | Detected | 174.9   | Detected | 382.3   | Detected   | Fam194a       | 1.493359375 | 0.68320313 | 1.55532954 | 0.7115541 |
| A_55_P2316 | 383.4   | Detected | 581.8   | Detected | 472.5   | Detected | 572.5   | Detected   | Gfm2          | 1.493218571 | 1.23239437 | 0.98401513 | 0.8121348 |
| A_55_P2106 | 79.3    | Detected | 73.5    | Detected | 75.8    | Detected | 118.4   | Detected   | Gm12349       | 1.493064313 | 0.95586381 | 1.61088435 | 1.0312925 |
| A_55_P2410 | 115     | Detected | 93.6    | Detected | 78.9    | Detected | 171.7   | Detected   | 2610028D06Rik | 1.493043478 | 0.68608696 | 1.83440171 | 0.8429487 |
| A_52_P5051 | 580.5   | Detected | 864.1   | Detected | 599.7   | Detected | 866.7   | Detected   | Jrk           | 1.493023256 | 1.03307494 | 1.00300891 | 0.6940169 |
| A_55_P2119 | 16096.3 | Detected | 21497   | Detected | 16736.3 | Detected | 24031.8 | Detected   | Usp10         | 1.493001497 | 1.03976069 | 1.11791413 | 0.7785412 |
| A_51_P2293 | 76.5    | Detected | 98.4    | Detected | 89.6    | Detected | 114.2   | Detected   | Trmt10b       | 1.492810458 | 1.17124183 | 1.16056911 | 0.9105691 |
| A_55_P2030 | 401     | Detected | 496.6   | Detected | 374.8   | Detected | 598.4   | Detected   | Rnaseh2a      | 1.492269327 | 0.93466334 | 1.20499396 | 0.7547322 |
| A_52_P1083 | 321.3   | Detected | 274.5   | Detected | 408.5   | Detected | 479.4   | Detected   | Ccdc71        | 1.492063492 | 1.27139745 | 1.74644809 | 1.4881603 |
| A_55_P2167 | 17669.9 | Detected | 15138   | Detected | 20898.6 | Detected | 26363.2 | Detected   | Kank2         | 1.491983543 | 1.18272316 | 1.74152464 | 1.380539  |
| A_55_P2009 | 51949.6 | Detected | 38612.2 | Detected | 71551.7 | Detected | 77505.8 | Detected   | Me1           | 1.49194219  | 1.37732918 | 2.00728785 | 1.8530853 |
| A_55_P1985 | 3303.7  | Detected | 2867.6  | Detected | 2396.9  | Detected | 4928.3  | Detected   | Atg16l2       | 1.491751672 | 0.72551987 | 1.71861487 | 0.8358558 |
| A_55_P2134 | 403.9   | Detected | 247.2   | Detected | 800.3   | Detected | 602.5   | Detected   | Rnf141        | 1.491705868 | 1.98143105 | 2.43729773 | 3.2374595 |
| A_51_P3551 | 126.3   | Detected | 135.1   | Detected | 194.2   | Detected | 188.4   | Detected   | Gm7008        | 1.491686461 | 1.53760887 | 1.39452258 | 1.4374537 |
| A_55_P2143 | 34.8    | Detected | 22.5    | Detected | 29.6    | Detected | 51.9    | Detected   | Ccdc108       | 1.49137931  | 0.85057471 | 2.30666667 | 1.3155556 |
| A_55_P2214 | 144.5   | Detected | 78.7    | Detected | 142.6   | Detected | 215.5   | Detected   | LOC552907     | 1.491349481 | 0.98685121 | 2.73824651 | 1.8119441 |
| A_55_P2098 | 34.6    | Detected | 48.5    | Detected | 37.2    | Detected | 51.6    | Detected   | Pp2d1         | 1.49132948  | 1.07514451 | 1.06391753 | 0.7670103 |
| A_52_P2732 | 4550.7  | Detected | 5112.2  | Detected | 4816.5  | Detected | 6785.4  | Detected   | Mfn1          | 1.491067308 | 1.0584086  | 1.32729549 | 0.942158  |
| A_55_P2078 | 3202.6  | Detected | 2305.9  | Detected | 2430    | Detected | 4775.2  | Detected   | Kmt2e         | 1.491038531 | 0.75875851 | 2.0708617  | 1.0538185 |
| A_51_P1650 | 454.2   | Detected | 547.8   | Detected | 518.8   | Detected | 677.2   | Detected   | Slc22a5       | 1.49097314  | 1.14222809 | 1.2362176  | 0.947061  |
| A_51_P4842 | 2514    | Detected | 4086.6  | Detected | 4160    | Detected | 3748.2  | Detected   | Slc7a6        | 1.490930788 | 1.65473349 | 0.91719278 | 1.0179611 |
| A_51_P1091 | 12524   | Detected | 15659.5 | Detected | 18486.5 | Detected | 18670.8 | Detected   | Os9           | 1.490801661 | 1.47608592 | 1.1922986  | 1.1805294 |
| A_55_P2059 | 10557.6 | Detected | 8956    | Detected | 8271.7  | Detected | 15737.6 | Detected   | Fastk         | 1.490641813 | 0.78348299 | 1.75721304 | 0.9235931 |
| A_66_P1168 | 25.7    | Detected | 25.9    | Detected | 22.4    | Detected | 38.3    | Not Detect | Gm1070        | 1.490272374 | 0.87159533 | 1.47876448 | 0.8648649 |
| A_55_P2104 | 479.3   | Detected | 542.4   | Detected | 514.7   | Detected | 714.2   | Detected   | Sox21         | 1.490089714 | 1.07385771 | 1.31674041 | 0.9489307 |
| A_55_P2328 | 396.2   | Detected | 284.9   | Detected | 874.7   | Detected | 590.3   | Detected   | Tle4          | 1.489904089 | 2.20772337 | 2.07195507 | 3.0702001 |
| A_55_P2088 | 924.8   | Detected | 988.2   | Detected | 1029.3  | Detected | 1377.8  | Detected   | Trip4         | 1.48983564  | 1.1129974  | 1.39425218 | 1.0415908 |
| A_51_P4177 | 493.9   | Detected | 404.8   | Detected | 417.8   | Detected | 735.8   | Detected   | Apaf1         | 1.489775258 | 0.84592023 | 1.81768775 | 1.0321146 |
| A_55_P2004 | 106     | Detected | 111.8   | Detected | 116.8   | Detected | 157.9   | Detected   | Gm2694        | 1.489622642 | 1.10188679 | 1.41234347 | 1.0447227 |
| A_51_P3788 | 158.1   | Detected | 175.9   | Detected | 170     | Detected | 235.5   | Detected   | Atg10         | 1.489563567 | 1.07526882 | 1.33882888 | 0.9664582 |
| A_51_P3496 | 7384.8  | Detected | 11455.3 | Detected | 8474.5  | Detected | 11000.1 | Detected   | Taf5l         | 1.489559636 | 1.14755985 | 0.96026294 | 0.7397886 |
| A_55_P2013 | 7994.5  | Detected | 7882.4  | Detected | 7448.4  | Detected | 11906.9 | Detected   | Prkag2        | 1.489386453 | 0.93169054 | 1.51056785 | 0.9449406 |
| A_66_P1025 | 1291.3  | Detected | 1722.9  | Detected | 1484.7  | Detected | 1923.1  | Detected   | Fam114a2      | 1.489274375 | 1.14977155 | 1.11619943 | 0.8617447 |



|            |         |            |         |            |          |            |          |            |               |             |            |            |           |
|------------|---------|------------|---------|------------|----------|------------|----------|------------|---------------|-------------|------------|------------|-----------|
| A_55_P1954 | 4817.5  | Detected   | 6509.1  | Detected   | 6639.1   | Detected   | 7174.3   | Detected   | Ccdc115       | 1.489216399 | 1.37812143 | 1.10219539 | 1.019972  |
| A_55_P2096 | 277.2   | Detected   | 237.4   | Detected   | 266.2    | Detected   | 412.8    | Detected   | Rasgrf2       | 1.489177489 | 0.96031746 | 1.73883741 | 1.1213142 |
| A_55_P2029 | 9.2     | Not Detect | 14.9    | Detected   | 10.2     | Not Detect | 13.7     | Not Detect | Gm7849        | 1.489130435 | 1.10869565 | 0.91946309 | 0.6845638 |
| A_51_P2852 | 7285.9  | Detected   | 5595.9  | Detected   | 7679.1   | Detected   | 10849.3  | Detected   | Ccdc61        | 1.489081651 | 1.05396725 | 1.93879447 | 1.3722726 |
| A_51_P2936 | 393.3   | Detected   | 467.6   | Detected   | 614.2    | Detected   | 585.6    | Detected   | Mrps14        | 1.488939741 | 1.56165777 | 1.25235244 | 1.3135158 |
| A_55_P2097 | 15201.9 | Detected   | 14520.1 | Detected   | 13687    | Detected   | 22630.6  | Detected   | Idua          | 1.48866918  | 0.90034798 | 1.55857053 | 0.9426244 |
| A_55_P2397 | 339.1   | Detected   | 239.2   | Detected   | 369.9    | Detected   | 504.8    | Detected   | B430316J06Rik | 1.488646417 | 1.09082866 | 2.11036789 | 1.5464047 |
| A_51_P1445 | 14505.8 | Detected   | 19093.2 | Detected   | 23422.4  | Detected   | 21593    | Detected   | Pgrmc1        | 1.488576983 | 1.61469205 | 1.13092619 | 1.2267404 |
| A_66_P1387 | 3403.5  | Detected   | 3139.5  | Detected   | 3473.9   | Detected   | 5066.3   | Detected   | Trappc10      | 1.488555898 | 1.02068459 | 1.6137283  | 1.1065138 |
| A_51_P2263 | 89912.5 | Detected   | 76688.9 | Detected   | 127984.1 | Detected   | 133834.7 | Detected   | Coa3          | 1.488499374 | 1.42342945 | 1.7451639  | 1.6688739 |
| A_55_P2023 | 47.3    | Detected   | 53.8    | Detected   | 43.4     | Detected   | 70.4     | Detected   | Cd300c        | 1.488372093 | 0.91754757 | 1.30855019 | 0.8066914 |
| A_55_P1974 | 25.4    | Detected   | 39.5    | Detected   | 16.2     | Not Detect | 37.8     | Not Detect | Plch2         | 1.488188976 | 0.63779528 | 0.95696203 | 0.4101266 |
| A_65_P1978 | 1983.3  | Detected   | 2207.5  | Detected   | 2602.3   | Detected   | 2951     | Detected   | Klf9          | 1.487924167 | 1.31210609 | 1.33680634 | 1.1788448 |
| A_66_P1152 | 20.7    | Detected   | 11.7    | Not Detect | 38       | Detected   | 30.8     | Not Detect | 1810010D01Rik | 1.487922705 | 1.83574879 | 2.63247863 | 3.2478632 |
| A_55_P2075 | 24.8    | Detected   | 11      | Not Detect | 22.2     | Detected   | 36.9     | Not Detect | Ankrd16       | 1.487903226 | 0.89516129 | 3.35454545 | 2.0181818 |
| A_55_P2169 | 77.7    | Detected   | 78.4    | Detected   | 62.5     | Detected   | 115.6    | Detected   | Gm3764        | 1.487773488 | 0.8043758  | 1.4744898  | 0.7971939 |
| A_55_P2143 | 40.8    | Detected   | 38.7    | Detected   | 43.2     | Detected   | 60.7     | Detected   | Fsbp          | 1.487745098 | 1.05882353 | 1.56847545 | 1.1162791 |
| A_55_P1987 | 3798.9  | Detected   | 4366.3  | Detected   | 5177.6   | Detected   | 5651.5   | Detected   | Fuom          | 1.487667483 | 1.36292085 | 1.29434533 | 1.1858095 |
| A_55_P2118 | 1648.5  | Detected   | 1488.5  | Detected   | 1907     | Detected   | 2452.3   | Detected   | Hk1           | 1.487594783 | 1.15680922 | 1.64749748 | 1.2811555 |
| A_55_P2153 | 780.5   | Detected   | 492.3   | Detected   | 706.5    | Detected   | 1160.9   | Detected   | Ralgsd        | 1.487379885 | 0.90518898 | 2.35811497 | 1.4351005 |
| A_52_P5466 | 523.8   | Detected   | 408.5   | Detected   | 502.8    | Detected   | 779      | Detected   | 1700029I15Rik | 1.487208858 | 0.95990836 | 1.90697674 | 1.2308446 |
| A_66_P1081 | 5925.6  | Detected   | 6601.8  | Detected   | 5604.6   | Detected   | 8811.5   | Detected   | Cbr1          | 1.487022411 | 0.94582827 | 1.33471175 | 0.8489503 |
| A_55_P2082 | 11479.3 | Detected   | 13652.8 | Detected   | 16705.8  | Detected   | 17069.9  | Detected   | 1500011K16Rik | 1.487015759 | 1.4552978  | 1.25028566 | 1.2236171 |
| A_55_P2015 | 34.5    | Detected   | 46.6    | Detected   | 111      | Detected   | 51.3     | Detected   | Enho          | 1.486956522 | 3.2173913  | 1.10085837 | 2.3819742 |
| A_55_P2396 | 1266.2  | Detected   | 1508.6  | Detected   | 1114.7   | Detected   | 1882.7   | Detected   | 1810073O08Rik | 1.486889907 | 0.88035066 | 1.24797826 | 0.738897  |
| A_51_P4183 | 5326.7  | Detected   | 7169.9  | Detected   | 6692.6   | Detected   | 7918.8   | Detected   | Nudcd2        | 1.486623989 | 1.25642518 | 1.10445055 | 0.93343   |
| A_55_P2068 | 263.3   | Detected   | 178.7   | Detected   | 291.2    | Detected   | 391.4    | Detected   | Spaca4        | 1.486517281 | 1.10596278 | 2.19026301 | 1.6295467 |
| A_65_P1679 | 593     | Detected   | 582     | Detected   | 537.2    | Detected   | 881.5    | Detected   | Psd4          | 1.486509275 | 0.90590219 | 1.51460481 | 0.9230241 |
| A_51_P3133 | 40.5    | Detected   | 44.9    | Detected   | 50.4     | Detected   | 60.2     | Detected   | 1700121C10Rik | 1.486419753 | 1.24444444 | 1.34075724 | 1.1224944 |
| A_52_P6428 | 231.5   | Detected   | 297.7   | Detected   | 302.9    | Detected   | 344.1    | Detected   | Lats1         | 1.486393089 | 1.30842333 | 1.15586161 | 1.0174672 |
| A_52_P7265 | 19778.6 | Detected   | 17303.5 | Detected   | 19074.7  | Detected   | 29395.5  | Detected   | Slc25a17      | 1.486227539 | 0.96441103 | 1.69881816 | 1.1023608 |
| A_66_P1205 | 28883.1 | Detected   | 28056.4 | Detected   | 37499.9  | Detected   | 42912.8  | Detected   | Pam16         | 1.485740797 | 1.29833363 | 1.52951911 | 1.3365899 |
| A_55_P2025 | 202.2   | Detected   | 287.6   | Detected   | 327.3    | Detected   | 300.4    | Detected   | Hif3a         | 1.485657765 | 1.61869436 | 1.04450626 | 1.1380389 |
| A_55_P2061 | 2573.6  | Detected   | 4383.3  | Detected   | 3495.3   | Detected   | 3822.4   | Detected   | Hspa4         | 1.485234691 | 1.35813646 | 0.87203705 | 0.7974129 |
| A_51_P1143 | 917.6   | Detected   | 1025.4  | Detected   | 1038.8   | Detected   | 1362.8   | Detected   | Ctu1          | 1.485178727 | 1.1320837  | 1.32904232 | 1.0130681 |
| A_55_P2098 | 1436.5  | Detected   | 913.4   | Detected   | 3448.7   | Detected   | 2133.4   | Detected   | Sh2d3c        | 1.485137487 | 2.40076575 | 2.33566893 | 3.7756733 |
| A_51_P2782 | 33.4    | Detected   | 32.2    | Detected   | 69.9     | Detected   | 49.6     | Detected   | Gltpd2        | 1.48502994  | 2.09281437 | 1.54037267 | 2.1708075 |
| A_55_P2015 | 1379.5  | Detected   | 2299.8  | Detected   | 4487.8   | Detected   | 2048.3   | Detected   | C1ra          | 1.484813338 | 3.25320768 | 0.89064266 | 1.9513871 |
| A_52_P3814 | 1908.4  | Detected   | 2091    | Detected   | 2358.2   | Detected   | 2833.5   | Detected   | Slc35b4       | 1.484751624 | 1.23569482 | 1.35509326 | 1.1277857 |
| A_66_P1272 | 4102.6  | Detected   | 4284.9  | Detected   | 5177.4   | Detected   | 6090.7   | Detected   | Ing3          | 1.484595135 | 1.26198021 | 1.42143341 | 1.2082896 |

|            |          |          |          |            |          |            |          |            |               |             |            |            |           |
|------------|----------|----------|----------|------------|----------|------------|----------|------------|---------------|-------------|------------|------------|-----------|
| A_55_P2052 | 168567.2 | Detected | 233182.6 | Detected   | 224681.4 | Detected   | 250226.4 | Detected   | Mif           | 1.484431135 | 1.3328892  | 1.07309207 | 0.9635427 |
| A_55_P2120 | 35.3     | Detected | 37.2     | Detected   | 43.5     | Detected   | 52.4     | Not Detect | Map3k12       | 1.484419263 | 1.23229462 | 1.40860215 | 1.1693548 |
| A_55_P2131 | 32253.5  | Detected | 29754.6  | Detected   | 30113.5  | Detected   | 47875.6  | Detected   | Zfp663        | 1.484353636 | 0.93365061 | 1.60901508 | 1.012062  |
| A_55_P2320 | 49.6     | Detected | 70.2     | Detected   | 61.7     | Detected   | 73.6     | Detected   | D15ErtD509e   | 1.483870968 | 1.24395161 | 1.04843305 | 0.8789174 |
| A_55_P2000 | 589.5    | Detected | 714.6    | Detected   | 587.1    | Detected   | 874.7    | Detected   | Dnaic1        | 1.48379983  | 0.99592875 | 1.22404142 | 0.8215785 |
| A_55_P2080 | 2965.4   | Detected | 3782.7   | Detected   | 3423.4   | Detected   | 4399.9   | Detected   | Cmtm7         | 1.483745869 | 1.15444797 | 1.16316388 | 0.9050149 |
| A_51_P4293 | 386.8    | Detected | 654.1    | Detected   | 5.5      | Not Detect | 573.9    | Detected   | Neto2         | 1.483712513 | 0.01421923 | 0.87738878 | 0.0084085 |
| A_55_P1994 | 15.3     | Detected | 17.8     | Detected   | 23.8     | Detected   | 22.7     | Not Detect | Emx2os        | 1.483660131 | 1.55555556 | 1.2752809  | 1.3370787 |
| A_55_P2075 | 1579.8   | Detected | 1345.5   | Detected   | 1456.1   | Detected   | 2343.5   | Detected   | Apc2          | 1.483415622 | 0.92169895 | 1.7417317  | 1.0821999 |
| A_55_P2023 | 23.8     | Detected | 17.6     | Not Detect | 31.8     | Detected   | 35.3     | Not Detect | Nlrp1a        | 1.483193277 | 1.33613445 | 2.00568182 | 1.8068182 |
| A_52_P5471 | 4385.1   | Detected | 5367.4   | Detected   | 7100.7   | Detected   | 6503.9   | Detected   | Tab2          | 1.483181683 | 1.61927892 | 1.21174125 | 1.322931  |
| A_55_P1968 | 3146.1   | Detected | 3748.4   | Detected   | 2958.6   | Detected   | 4666     | Detected   | Cbr4          | 1.483106068 | 0.9404024  | 1.24479778 | 0.7892968 |
| A_51_P5189 | 2370.5   | Detected | 2215.7   | Detected   | 2325.8   | Detected   | 3515.3   | Detected   | 2310047M10Rik | 1.482936089 | 0.98114322 | 1.5865415  | 1.0496908 |
| A_55_P2129 | 712.1    | Detected | 583.1    | Detected   | 180.2    | Detected   | 1055.9   | Detected   | Smad9         | 1.48279736  | 0.25305435 | 1.81083862 | 0.3090379 |
| A_51_P2925 | 5699.3   | Detected | 8189.8   | Detected   | 7264.4   | Detected   | 8450.2   | Detected   | Xpot          | 1.482673311 | 1.27461267 | 1.03179565 | 0.8870058 |
| A_51_P2672 | 127.7    | Detected | 93.3     | Detected   | 139.3    | Detected   | 189.3    | Detected   | Slc15a2       | 1.482380579 | 1.0908379  | 2.02893891 | 1.4930332 |
| A_55_P2117 | 31041.3  | Detected | 31178.6  | Detected   | 41043.5  | Detected   | 46008    | Detected   | Pam16         | 1.48215442  | 1.32222233 | 1.47562751 | 1.3163997 |
| A_66_P1002 | 63.5     | Detected | 84.5     | Detected   | 53.7     | Detected   | 94.1     | Detected   | Rhox1         | 1.481889764 | 0.84566929 | 1.11360947 | 0.635503  |
| A_55_P1970 | 914.6    | Detected | 929      | Detected   | 1303.5   | Detected   | 1355.3   | Detected   | Aamdc         | 1.481849989 | 1.42521321 | 1.45888052 | 1.4031216 |
| A_55_P2015 | 164      | Detected | 205.2    | Detected   | 119.8    | Detected   | 243      | Detected   | Wwox          | 1.481707317 | 0.7304878  | 1.18421053 | 0.5838207 |
| A_55_P1999 | 84840    | Detected | 101119.1 | Detected   | 80899.1  | Detected   | 125705.5 | Detected   | Gm10631       | 1.481677275 | 0.95354903 | 1.24314299 | 0.8000378 |
| A_52_P1890 | 128.1    | Detected | 149.9    | Detected   | 136.2    | Detected   | 189.8    | Detected   | Gk5           | 1.481654957 | 1.06323185 | 1.26617745 | 0.9086057 |
| A_55_P1956 | 392.2    | Detected | 475.6    | Detected   | 470.9    | Detected   | 581.1    | Detected   | Dis3l2        | 1.481642019 | 1.20066293 | 1.22182506 | 0.9901177 |
| A_55_P2161 | 372.9    | Detected | 338.7    | Detected   | 398.4    | Detected   | 552.5    | Detected   | Serpina3b     | 1.481630464 | 1.06838294 | 1.63123708 | 1.1762622 |
| A_55_P2275 | 805.4    | Detected | 663.5    | Detected   | 719.6    | Detected   | 1193.3   | Detected   | Th            | 1.481624038 | 0.89346908 | 1.79849284 | 1.0845516 |
| A_52_P5636 | 10833.5  | Detected | 11706.1  | Detected   | 10123.4  | Detected   | 16050.2  | Detected   | Ssbp4         | 1.48153413  | 0.93445332 | 1.37109712 | 0.864797  |
| A_55_P2426 | 73.1     | Detected | 70.1     | Detected   | 83.3     | Detected   | 108.3    | Detected   | D530017H19Rik | 1.481532148 | 1.13953488 | 1.54493581 | 1.1883024 |
| A_55_P2096 | 442.3    | Detected | 461.1    | Detected   | 400.6    | Detected   | 655.2    | Detected   | Polr2c        | 1.481347502 | 0.9057201  | 1.4209499  | 0.868792  |
| A_55_P2102 | 627.6    | Detected | 585.1    | Detected   | 744.8    | Detected   | 929.6    | Detected   | Fbxl4         | 1.481198215 | 1.18674315 | 1.58878824 | 1.2729448 |
| A_55_P2279 | 292.2    | Detected | 302      | Detected   | 281.5    | Detected   | 432.8    | Detected   | 5430400D12Rik | 1.481177276 | 0.96338125 | 1.43311258 | 0.9321192 |
| A_55_P2024 | 77374    | Detected | 90026.9  | Detected   | 117643.1 | Detected   | 114601.8 | Detected   | Atp5l         | 1.481140952 | 1.52044744 | 1.27297286 | 1.306755  |
| A_52_P1869 | 136.2    | Detected | 151.1    | Detected   | 230.5    | Detected   | 201.7    | Detected   | Dennd6a       | 1.480910426 | 1.69236417 | 1.33487756 | 1.5254798 |
| A_55_P1995 | 898.2    | Detected | 1013.4   | Detected   | 1327.8   | Detected   | 1330.1   | Detected   | H2-Q10        | 1.48085059  | 1.47828991 | 1.31251233 | 1.3102427 |
| A_52_P3909 | 33.9     | Detected | 21.4     | Detected   | 10.2     | Not Detect | 50.2     | Detected   | Ccdc96        | 1.480825959 | 0.30088496 | 2.34579439 | 0.4766355 |
| A_66_P1094 | 156.2    | Detected | 236.4    | Detected   | 257.4    | Detected   | 231.2    | Detected   | Mtfr2         | 1.480153649 | 1.64788732 | 0.97800338 | 1.0888325 |
| A_55_P2066 | 122.7    | Detected | 161.3    | Detected   | 70.6     | Detected   | 181.6    | Detected   | Prmt6         | 1.4800326   | 0.57538712 | 1.12585245 | 0.4376937 |
| A_51_P1771 | 37.5     | Detected | 28.9     | Detected   | 46       | Detected   | 55.5     | Detected   | Rdh19         | 1.48        | 1.22666667 | 1.92041522 | 1.5916955 |
| A_55_P2035 | 234.4    | Detected | 283.3    | Detected   | 777.6    | Detected   | 346.9    | Detected   | D5ErtD605e    | 1.479948805 | 3.31740614 | 1.224497   | 2.7447935 |
| A_55_P2040 | 2286.3   | Detected | 2744.3   | Detected   | 2647.7   | Detected   | 3383.4   | Detected   | Gm1604b       | 1.479858286 | 1.15807199 | 1.2328827  | 0.9647998 |
| A_51_P1514 | 20554.6  | Detected | 27418.7  | Detected   | 38994.1  | Detected   | 30415.1  | Detected   | Atp1b1        | 1.479722301 | 1.89709846 | 1.10928308 | 1.4221717 |

|            |                  |                  |                  |                   |               |             |            |            |           |
|------------|------------------|------------------|------------------|-------------------|---------------|-------------|------------|------------|-----------|
| A_55_P1968 | 22.1 Detected    | 23.7 Detected    | 89 Detected      | 32.7 Not Detect   | Agbl3         | 1.479638009 | 4.02714932 | 1.37974684 | 3.7552743 |
| A_51_P3318 | 38.8 Detected    | 38.3 Detected    | 34.1 Detected    | 57.4 Detected     | Tcl1b4        | 1.479381443 | 0.87886598 | 1.49869452 | 0.8903394 |
| A_55_P2022 | 1374.7 Detected  | 1560.8 Detected  | 2412 Detected    | 2033.6 Detected   | Pdss2         | 1.479304576 | 1.75456463 | 1.30292158 | 1.5453614 |
| A_51_P3938 | 4712.7 Detected  | 5008.6 Detected  | 6775.5 Detected  | 6970.8 Detected   | Mpi           | 1.479152078 | 1.43771087 | 1.39176616 | 1.3527732 |
| A_55_P2025 | 14770.1 Detected | 16987.2 Detected | 21835.5 Detected | 21846.9 Detected  | Immt          | 1.479130135 | 1.4783583  | 1.28608011 | 1.285409  |
| A_66_P1117 | 6702.1 Detected  | 8492 Detected    | 7097.5 Detected  | 9912.8 Detected   | Gatad2a       | 1.479058802 | 1.05899643 | 1.16731041 | 0.8357866 |
| A_55_P1975 | 23.8 Detected    | 36.3 Detected    | 29.2 Detected    | 35.2 Not Detect   | Crygc         | 1.478991597 | 1.22689076 | 0.96969697 | 0.8044077 |
| A_51_P2296 | 59.3 Detected    | 64.9 Detected    | 67.5 Detected    | 87.7 Detected     | Pcsk2         | 1.478920742 | 1.13827993 | 1.35130971 | 1.0400616 |
| A_55_P1984 | 10847.1 Detected | 16452.1 Detected | 10979.6 Detected | 16041.6 Detected  | Zc3h18        | 1.478883757 | 1.01221525 | 0.97504878 | 0.6673677 |
| A_51_P2863 | 32789.6 Detected | 42630.7 Detected | 30149.3 Detected | 48489.8 Detected  | 2310036O22Rik | 1.478816454 | 0.91947752 | 1.13743851 | 0.7072204 |
| A_52_P3855 | 47.2 Detected    | 52.8 Detected    | 16.2 Detected    | 69.8 Detected     | Ddx58         | 1.478813559 | 0.34322034 | 1.3219697  | 0.3068182 |
| A_51_P2287 | 28.2 Detected    | 34 Detected      | 18.3 Detected    | 41.7 Not Detect   | Kcnc4         | 1.478723404 | 0.64893617 | 1.22647059 | 0.5382353 |
| A_55_P1992 | 72318.2 Detected | 90258.7 Detected | 67358.8 Detected | 106917.8 Detected | Vdac3         | 1.478435581 | 0.93142252 | 1.18457057 | 0.746286  |
| A_55_P2008 | 1582.4 Detected  | 3363.2 Detected  | 2237.3 Detected  | 2339.3 Detected   | Itp1          | 1.478324065 | 1.41386502 | 0.6955578  | 0.6652295 |
| A_52_P2068 | 3075.5 Detected  | 2940.6 Detected  | 4462.6 Detected  | 4546 Detected     | Prpf18        | 1.478133637 | 1.45101609 | 1.545943   | 1.5175814 |
| A_55_P2011 | 20.5 Detected    | 42.4 Detected    | 26.3 Detected    | 30.3 Not Detect   | Meiob         | 1.47804878  | 1.28292683 | 0.71462264 | 0.620283  |
| A_51_P2264 | 997.2 Detected   | 1558.5 Detected  | 1385.8 Detected  | 1473.9 Detected   | Rhobtb2       | 1.478038508 | 1.38969114 | 0.94571704 | 0.8891883 |
| A_55_P1975 | 1674.1 Detected  | 1921.1 Detected  | 1535.2 Detected  | 2474.3 Detected   | Gm10777       | 1.477988173 | 0.91703005 | 1.28796002 | 0.7991255 |
| A_55_P1996 | 79173.2 Detected | 95871.8 Detected | 75735.4 Detected | 117013.9 Detected | Cdc20         | 1.477948346 | 0.95657874 | 1.2205247  | 0.7899653 |
| A_55_P2168 | 61.1 Detected    | 56.8 Detected    | 65.8 Detected    | 90.3 Detected     | Pik3c2b       | 1.477905074 | 1.07692308 | 1.58978873 | 1.1584507 |
| A_55_P2041 | 72.4 Detected    | 73.3 Detected    | 68.3 Detected    | 107 Detected      | Slc2a13       | 1.477900552 | 0.94337017 | 1.45975443 | 0.9317872 |
| A_52_P5062 | 2418.5 Detected  | 4017.1 Detected  | 3906.9 Detected  | 3574.2 Detected   | Cmtm4         | 1.477858177 | 1.61542278 | 0.88974633 | 0.9725673 |
| A_52_P4064 | 227.3 Detected   | 307.4 Detected   | 291 Detected     | 335.9 Detected    | Mbtps1        | 1.477782666 | 1.28024637 | 1.09271308 | 0.9466493 |
| A_55_P2038 | 181.9 Detected   | 116.1 Detected   | 188.1 Detected   | 268.8 Detected    | Ptprj         | 1.477735019 | 1.03408466 | 2.31524548 | 1.620155  |
| A_51_P3913 | 1678.9 Detected  | 802.1 Detected   | 1075.3 Detected  | 2480.4 Detected   | Fam63b        | 1.477395914 | 0.64047888 | 3.0923825  | 1.3406059 |
| A_51_P5083 | 15585.2 Detected | 25358.5 Detected | 16333.7 Detected | 23021.8 Detected  | Cdc16         | 1.477157816 | 1.04802633 | 0.90785338 | 0.6441114 |
| A_51_P3998 | 4401.9 Detected  | 5359.9 Detected  | 5416.3 Detected  | 6501.9 Detected   | Ap4b1         | 1.477066721 | 1.23044594 | 1.21306368 | 1.0105226 |
| A_55_P2125 | 103.4 Detected   | 154.3 Detected   | 93 Detected      | 152.7 Detected    | 4930523C07Rik | 1.476789168 | 0.89941973 | 0.98963059 | 0.602722  |
| A_55_P2119 | 34.4 Detected    | 23.2 Detected    | 28.5 Detected    | 50.8 Not Detect   | Foxe3         | 1.476744186 | 0.82848837 | 2.18965517 | 1.2284483 |
| A_55_P2032 | 47.2 Detected    | 37.2 Detected    | 48.3 Detected    | 69.7 Detected     | Ajap1         | 1.476694915 | 1.02330508 | 1.87365591 | 1.2983871 |
| A_55_P2074 | 379.1 Detected   | 322 Detected     | 337.8 Detected   | 559.8 Detected    | Cpt2          | 1.476655236 | 0.89105777 | 1.73850932 | 1.0490683 |
| A_55_P1998 | 111.2 Detected   | 114.1 Detected   | 118.6 Detected   | 164.2 Detected    | Ccser1        | 1.476618705 | 1.06654676 | 1.43908852 | 1.0394391 |
| A_55_P2009 | 172.5 Detected   | 190.8 Detected   | 169.9 Detected   | 254.7 Detected    | Ovch2         | 1.476521739 | 0.98492754 | 1.33490566 | 0.8904612 |
| A_51_P1477 | 593.9 Detected   | 1048 Detected    | 522 Detected     | 876.6 Detected    | Sugp2         | 1.476006062 | 0.87893585 | 0.83645038 | 0.4980916 |
| A_55_P2156 | 280.9 Detected   | 331.9 Detected   | 473.9 Detected   | 414.6 Detected    | Pdss2         | 1.475970096 | 1.68707725 | 1.24917144 | 1.4278397 |
| A_55_P2101 | 221.5 Detected   | 130 Detected     | 208.2 Detected   | 326.9 Detected    | Alpk1         | 1.475846501 | 0.93995485 | 2.51461538 | 1.6015385 |
| A_51_P4068 | 32.6 Detected    | 34.5 Detected    | 34.3 Detected    | 48.1 Detected     | Mei1          | 1.475460123 | 1.05214724 | 1.3942029  | 0.9942029 |
| A_55_P2146 | 703.6 Detected   | 723.7 Detected   | 1220.3 Detected  | 1038 Detected     | Ccdc107       | 1.47527004  | 1.73436612 | 1.43429598 | 1.6861959 |
| A_66_P1300 | 20.2 Detected    | 31.4 Detected    | 16.6 Not Detect  | 29.8 Not Detect   | Klk1b24       | 1.475247525 | 0.82178218 | 0.94904459 | 0.5286624 |
| A_55_P2173 | 80.6 Detected    | 85.1 Detected    | 91 Detected      | 118.9 Detected    | Insr          | 1.475186104 | 1.12903226 | 1.39717979 | 1.0693302 |

|            |                  |                  |                  |                  |               |             |            |            |           |
|------------|------------------|------------------|------------------|------------------|---------------|-------------|------------|------------|-----------|
| A_52_P5378 | 355.3 Detected   | 331.5 Detected   | 537.7 Detected   | 524.1 Detected   | Fam120b       | 1.475091472 | 1.51336898 | 1.58099548 | 1.6220211 |
| A_52_P3506 | 8644.7 Detected  | 8089.4 Detected  | 9830 Detected    | 12751.3 Detected | Mrm1          | 1.475042512 | 1.13711291 | 1.57629738 | 1.2151705 |
| A_55_P2034 | 3746.5 Detected  | 3650.2 Detected  | 4540 Detected    | 5525.4 Detected  | Zscan26       | 1.474816495 | 1.21179768 | 1.51372528 | 1.2437675 |
| A_52_P3166 | 2756.6 Detected  | 2799.4 Detected  | 4196.4 Detected  | 4065.4 Detected  | Bet1          | 1.474787782 | 1.52231009 | 1.45223977 | 1.4990355 |
| A_55_P2062 | 27724.6 Detected | 26139.4 Detected | 31977.4 Detected | 40883.7 Detected | Atp6v0a1      | 1.474636244 | 1.15339446 | 1.56406421 | 1.223341  |
| A_55_P1980 | 17.7 Detected    | 16.9 Not Detect  | 13.4 Not Detect  | 26.1 Not Detect  | 4921504E06Rik | 1.474576271 | 0.75706215 | 1.5443787  | 0.7928994 |
| A_51_P2089 | 5757.6 Detected  | 12204.8 Detected | 8021.7 Detected  | 8489.7 Detected  | Stc2          | 1.474520634 | 1.39323677 | 0.69560337 | 0.6572578 |
| A_55_P2010 | 17.5 Detected    | 25.9 Detected    | 19.2 Not Detect  | 25.8 Not Detect  | Apc           | 1.474285714 | 1.09714286 | 0.996139   | 0.7413127 |
| A_52_P6041 | 7707.4 Detected  | 7418.3 Detected  | 14043.4 Detected | 11362.5 Detected | Mbp           | 1.474232556 | 1.8220671  | 1.53168516 | 1.8930752 |
| A_55_P2156 | 789.4 Detected   | 824.3 Detected   | 825.2 Detected   | 1163.7 Detected  | Btbd16        | 1.474157588 | 1.0453509  | 1.4117433  | 1.0010918 |
| A_55_P2157 | 671.4 Detected   | 909.4 Detected   | 877 Detected     | 989.7 Detected   | Mlit3         | 1.474084004 | 1.3062258  | 1.08829998 | 0.9643721 |
| A_52_P5404 | 14173.2 Detected | 12514.7 Detected | 16766.6 Detected | 20890.9 Detected | Ppp1cc        | 1.473972003 | 1.18297914 | 1.66930889 | 1.3397525 |
| A_55_P2002 | 17.1 Detected    | 18.9 Detected    | 15.7 Not Detect  | 25.2 Not Detect  | Olah          | 1.473684211 | 0.91812865 | 1.33333333 | 0.8306878 |
| A_52_P6419 | 464.3 Detected   | 467 Detected     | 707.1 Detected   | 684.2 Detected   | Nhlrc3        | 1.473616196 | 1.52293776 | 1.46509636 | 1.5141328 |
| A_55_P2012 | 3108.8 Detected  | 3659.2 Detected  | 2623.7 Detected  | 4581.1 Detected  | Lrrc8e        | 1.473591096 | 0.84395908 | 1.25194031 | 0.7170146 |
| A_55_P2083 | 16794.5 Detected | 15659.8 Detected | 19081.7 Detected | 24745.2 Detected | Irf3          | 1.473410938 | 1.13618744 | 1.58017344 | 1.2185149 |
| A_55_P1990 | 14.8 Detected    | 13.3 Not Detect  | 17.4 Detected    | 21.8 Not Detect  | Dlgap3        | 1.472972973 | 1.17567568 | 1.63909774 | 1.3082707 |
| A_55_P2058 | 27.7 Detected    | 45.3 Detected    | 70.5 Detected    | 40.8 Not Detect  | Fancc         | 1.472924188 | 2.54512635 | 0.90066225 | 1.5562914 |
| A_52_P5891 | 1404.1 Detected  | 1624.8 Detected  | 1855.9 Detected  | 2068.1 Detected  | Rhno1         | 1.472900791 | 1.32177195 | 1.27283358 | 1.1422329 |
| A_55_P2408 | 250.5 Detected   | 312.6 Detected   | 234.9 Detected   | 368.9 Detected   | Kcnq1ot1      | 1.472654691 | 0.93772455 | 1.18010237 | 0.7514395 |
| A_55_P2151 | 3402.1 Detected  | 4339.5 Detected  | 4258.7 Detected  | 5009 Detected    | Dis3l2        | 1.472325916 | 1.25178566 | 1.15428045 | 0.9813803 |
| A_51_P2794 | 3663.5 Detected  | 5937.6 Detected  | 3302.4 Detected  | 5393.7 Detected  | Farsa         | 1.472280606 | 0.90143306 | 0.90839733 | 0.5561843 |
| A_55_P2070 | 3597.7 Detected  | 3599.1 Detected  | 2705.7 Detected  | 5296.5 Detected  | Wdfy1         | 1.472190566 | 0.75206382 | 1.4716179  | 0.7517713 |
| A_55_P2059 | 472.7 Detected   | 575.5 Detected   | 469.8 Detected   | 695.9 Detected   | Gon4l         | 1.472181087 | 0.99386503 | 1.20920938 | 0.8163336 |
| A_55_P1996 | 118.6 Detected   | 123 Detected     | 99.7 Detected    | 174.6 Detected   | Wdr38         | 1.472175379 | 0.84064081 | 1.4195122  | 0.8105691 |
| A_55_P2007 | 35749.1 Detected | 35367.2 Detected | 28278.4 Detected | 52627.2 Detected | Mepce         | 1.472126571 | 0.79102411 | 1.4880228  | 0.7995657 |
| A_55_P2169 | 5514.8 Detected  | 4123.9 Detected  | 3832.9 Detected  | 8117.6 Detected  | Mfsd6         | 1.471966345 | 0.69502067 | 1.96842794 | 0.9294357 |
| A_55_P2142 | 1976 Detected    | 1785.8 Detected  | 1794.7 Detected  | 2908 Detected    | Parp9         | 1.471659919 | 0.90824899 | 1.62840184 | 1.0049838 |
| A_55_P2122 | 1201.8 Detected  | 1202.9 Detected  | 897.7 Detected   | 1768.6 Detected  | Polm          | 1.471625894 | 0.74696289 | 1.47028016 | 0.7462798 |
| A_51_P3991 | 383.9 Detected   | 901.8 Detected   | 565 Detected     | 564.9 Detected   | Ppm1j         | 1.471476947 | 1.47173743 | 0.62641384 | 0.6265247 |
| A_52_P4897 | 395.3 Detected   | 262.1 Detected   | 807.7 Detected   | 581.6 Detected   | Ablim1        | 1.47128763  | 2.04325828 | 2.21900038 | 3.0816482 |
| A_51_P4419 | 170.6 Detected   | 190.7 Detected   | 180.9 Detected   | 251 Detected     | Stox2         | 1.471277843 | 1.06037515 | 1.31620346 | 0.9486104 |
| A_55_P2072 | 45.2 Detected    | 45.3 Detected    | 41.7 Detected    | 66.5 Detected    | Pisd-ps3      | 1.471238938 | 0.92256637 | 1.46799117 | 0.9205298 |
| A_51_P1594 | 32.9 Detected    | 27.2 Detected    | 25.9 Detected    | 48.4 Not Detect  | Ocrl          | 1.47112462  | 0.78723404 | 1.77941176 | 0.9522059 |
| A_55_P2050 | 13180 Detected   | 13807.4 Detected | 16840.8 Detected | 19389.1 Detected | I7Rn6         | 1.471100152 | 1.27775417 | 1.40425424 | 1.2196938 |
| A_51_P2273 | 36.3 Detected    | 27.8 Detected    | 56 Detected      | 53.4 Detected    | Dpep1         | 1.47107438  | 1.54269972 | 1.92086331 | 2.0143885 |
| A_52_P6622 | 389.8 Detected   | 469.2 Detected   | 510.3 Detected   | 573.3 Detected   | Slc25a47      | 1.470754233 | 1.30913289 | 1.22186701 | 1.0875959 |
| A_55_P1985 | 2487 Detected    | 4269.3 Detected  | 2134.9 Detected  | 3657.3 Detected  | Pard3         | 1.470566948 | 0.8584238  | 0.85665097 | 0.5000586 |
| A_55_P1971 | 14251.7 Detected | 13848.8 Detected | 20640.1 Detected | 20957.8 Detected | Ift46         | 1.470547373 | 1.4482553  | 1.51332967 | 1.4903891 |
| A_55_P2255 | 42.3 Detected    | 52.4 Detected    | 81.1 Detected    | 62.2 Detected    | 2610020C07Rik | 1.470449173 | 1.91725768 | 1.1870229  | 1.5477099 |

|            |                  |                  |                  |                   |               |             |            |            |           |
|------------|------------------|------------------|------------------|-------------------|---------------|-------------|------------|------------|-----------|
| A_52_P1138 | 84.2 Detected    | 102.4 Detected   | 92.5 Detected    | 123.8 Detected    | 1600025M17Rik | 1.470308789 | 1.09857482 | 1.20898438 | 0.9033203 |
| A_55_P2033 | 10961.1 Detected | 10289.8 Detected | 10543 Detected   | 16115.5 Detected  | Cpt2          | 1.470244775 | 0.96185602 | 1.56616261 | 1.0246069 |
| A_55_P2058 | 220.1 Detected   | 326.8 Detected   | 239.1 Detected   | 323.6 Detected    | Slc35e3       | 1.4702408   | 1.0863244  | 0.99020808 | 0.7316401 |
| A_55_P2054 | 78.5 Detected    | 70.6 Detected    | 63.3 Detected    | 115.4 Detected    | Gm3285        | 1.470063694 | 0.80636943 | 1.63456091 | 0.8966006 |
| A_51_P3242 | 433.6 Detected   | 520.1 Detected   | 541.1 Detected   | 637.4 Detected    | Dcaf5         | 1.47001845  | 1.24792435 | 1.22553355 | 1.0403769 |
| A_55_P2101 | 10871.9 Detected | 16047 Detected   | 15808.6 Detected | 15981.3 Detected  | Pcmt1         | 1.469963852 | 1.45407886 | 0.99590578 | 0.9851436 |
| A_55_P1974 | 412.2 Detected   | 834.2 Detected   | 326.3 Detected   | 605.9 Detected    | Pde1b         | 1.469917516 | 0.79160602 | 0.72632462 | 0.3911532 |
| A_52_P1933 | 651.2 Detected   | 791 Detected     | 644.9 Detected   | 957.2 Detected    | Chmp4c        | 1.46990172  | 0.99032555 | 1.21011378 | 0.8152971 |
| A_51_P4629 | 1386.5 Detected  | 1563.8 Detected  | 1905.7 Detected  | 2038 Detected     | Ap5m1         | 1.469888208 | 1.37446809 | 1.30323571 | 1.2186341 |
| A_55_P2033 | 6346.5 Detected  | 5649.3 Detected  | 6922.8 Detected  | 9328.2 Detected   | Sppl2a        | 1.46981801  | 1.09080596 | 1.65121342 | 1.2254262 |
| A_55_P2210 | 160.8 Detected   | 114 Detected     | 85.1 Detected    | 236.3 Detected    | Mroh1         | 1.469527363 | 0.52922886 | 2.07280702 | 0.7464912 |
| A_52_P2636 | 68.8 Detected    | 58.1 Detected    | 51.4 Detected    | 101.1 Detected    | Hes2          | 1.469476744 | 0.74709302 | 1.74010327 | 0.8846816 |
| A_52_P6403 | 247.1 Detected   | 404.6 Detected   | 331.9 Detected   | 363.1 Detected    | Usp53         | 1.469445569 | 1.3431809  | 0.89742956 | 0.8203164 |
| A_55_P2065 | 1049.5 Detected  | 892 Detected     | 1796.1 Detected  | 1541.9 Detected   | Zfp189        | 1.469175798 | 1.71138637 | 1.72858744 | 2.013565  |
| A_52_P2630 | 93745.9 Detected | 70254.3 Detected | 78513.8 Detected | 137722.2 Detected | Ahnak         | 1.469101049 | 0.83751716 | 1.96033837 | 1.1175658 |
| A_55_P2168 | 19.4 Detected    | 21.2 Detected    | 14.4 Not Detect  | 28.5 Not Detect   | Gm3881        | 1.469072165 | 0.74226804 | 1.34433962 | 0.6792453 |
| A_52_P1808 | 890.5 Detected   | 956 Detected     | 794.7 Detected   | 1308.2 Detected   | Exoc3         | 1.469062325 | 0.89241999 | 1.36841004 | 0.8312762 |
| A_55_P2135 | 4971.3 Detected  | 5654.8 Detected  | 3686.1 Detected  | 7301.2 Detected   | Zfp358        | 1.468670167 | 0.74147607 | 1.29115088 | 0.6518533 |
| A_55_P2054 | 1170.3 Detected  | 875.5 Detected   | 563.4 Detected   | 1718.5 Detected   | Fam178b       | 1.468426899 | 0.48141502 | 1.96287836 | 0.643518  |
| A_51_P5193 | 5216.8 Detected  | 4463.7 Detected  | 6673.1 Detected  | 7659.9 Detected   | Sacm1l        | 1.468313909 | 1.2791558  | 1.71604274 | 1.4949705 |
| A_55_P2243 | 913.5 Detected   | 916.2 Detected   | 642.3 Detected   | 1341.2 Detected   | Gdap10        | 1.468199234 | 0.70311987 | 1.46387252 | 0.7010478 |
| A_55_P2423 | 8636.2 Detected  | 9120.9 Detected  | 6677 Detected    | 12679.2 Detected  | B230369F24Rik | 1.468145712 | 0.77314096 | 1.39012597 | 0.732055  |
| A_55_P2028 | 90.8 Detected    | 72.1 Detected    | 97.8 Detected    | 133.3 Detected    | E030019B06Rik | 1.468061674 | 1.07709251 | 1.84882108 | 1.3564494 |
| A_55_P2152 | 139.6 Detected   | 111.8 Detected   | 91.1 Detected    | 204.9 Detected    | Mfsd6         | 1.467765043 | 0.6525788  | 1.83273703 | 0.8148479 |
| A_52_P3709 | 172.1 Detected   | 121.7 Detected   | 213.6 Detected   | 252.6 Detected    | Magi1         | 1.467751307 | 1.24113887 | 2.07559573 | 1.7551356 |
| A_55_P2182 | 133.2 Detected   | 147.5 Detected   | 132.1 Detected   | 195.5 Detected    | Wars2         | 1.467717718 | 0.99174174 | 1.32542373 | 0.8955932 |
| A_51_P2923 | 475.3 Detected   | 502.1 Detected   | 878.6 Detected   | 697.6 Detected    | Tmco6         | 1.467704608 | 1.84851673 | 1.38936467 | 1.7498506 |
| A_66_P1247 | 2739.8 Detected  | 5193.3 Detected  | 3995.9 Detected  | 4021 Detected     | Fut8          | 1.467625374 | 1.45846412 | 0.77426684 | 0.7694337 |
| A_55_P2252 | 33.8 Detected    | 33.3 Detected    | 66.3 Detected    | 49.6 Detected     | Stamos        | 1.467455621 | 1.96153846 | 1.48948949 | 1.990991  |
| A_52_P4098 | 3893 Detected    | 2568.3 Detected  | 5459.6 Detected  | 5712.7 Detected   | Plat          | 1.467428718 | 1.40241459 | 2.2243118  | 2.1257641 |
| A_55_P2079 | 23618.9 Detected | 39047.6 Detected | 24095.8 Detected | 34653.8 Detected  | LOC631033     | 1.467206347 | 1.02019146 | 0.8874758  | 0.6170879 |
| A_51_P3685 | 2903.6 Detected  | 2958.8 Detected  | 4519.6 Detected  | 4259.5 Detected   | Tle6          | 1.466972035 | 1.55655049 | 1.43960389 | 1.5275112 |
| A_51_P1892 | 3097.1 Detected  | 3840.5 Detected  | 3712.9 Detected  | 4542.7 Detected   | Mbnl2         | 1.466759226 | 1.19883116 | 1.18284078 | 0.9667752 |
| A_51_P2114 | 10145.6 Detected | 10407.3 Detected | 11136 Detected   | 14880.9 Detected  | Gusb          | 1.466734348 | 1.09761867 | 1.42985212 | 1.0700182 |
| A_55_P2073 | 194.6 Detected   | 244.8 Detected   | 172.8 Detected   | 285.4 Detected    | Mina          | 1.46659815  | 0.88797533 | 1.16584967 | 0.7058824 |
| A_55_P2382 | 76.1 Detected    | 62.1 Detected    | 66.9 Detected    | 111.6 Detected    | Slc38a9       | 1.466491459 | 0.87910644 | 1.79710145 | 1.0772947 |
| A_55_P2185 | 239.9 Detected   | 653.2 Detected   | 315 Detected     | 351.8 Detected    | Copz2         | 1.466444352 | 1.3130471  | 0.5385793  | 0.4822413 |
| A_55_P2097 | 28.3 Detected    | 52 Detected      | 50.6 Detected    | 41.5 Not Detect   | Tctex1d4      | 1.466431095 | 1.78798587 | 0.79807692 | 0.9730769 |
| A_55_P2111 | 238 Detected     | 324.7 Detected   | 223.8 Detected   | 349 Detected      | Itga10        | 1.466386555 | 0.94033613 | 1.07483831 | 0.6892516 |
| A_55_P2376 | 20.8 Detected    | 13.5 Not Detect  | 19.5 Detected    | 30.5 Not Detect   | 4.93E+23      | 1.466346154 | 0.9375     | 2.25925926 | 1.4444444 |

|            |          |            |          |          |          |            |          |            |               |             |            |            |           |
|------------|----------|------------|----------|----------|----------|------------|----------|------------|---------------|-------------|------------|------------|-----------|
| A_52_P7577 | 380      | Detected   | 2546.3   | Detected | 394.6    | Detected   | 557.2    | Detected   | Lgr6          | 1.466315789 | 1.03842105 | 0.21882732 | 0.15497   |
| A_52_P5659 | 687.6    | Detected   | 557.5    | Detected | 621.2    | Detected   | 1008.2   | Detected   | Nsd1          | 1.466259453 | 0.90343223 | 1.80843049 | 1.1142601 |
| A_51_P1028 | 1426.1   | Detected   | 1219.3   | Detected | 1587.1   | Detected   | 2091     | Detected   | Herpud2       | 1.466236589 | 1.11289531 | 1.7149184  | 1.3016485 |
| A_55_P2027 | 42095.3  | Detected   | 36809    | Detected | 48380.9  | Detected   | 61719    | Detected   | Hk1           | 1.466173183 | 1.14931833 | 1.67673667 | 1.3143769 |
| A_52_P5374 | 252.7    | Detected   | 283.1    | Detected | 211.3    | Detected   | 370.5    | Detected   | Sec62         | 1.466165414 | 0.83616937 | 1.30872483 | 0.7463794 |
| A_55_P2146 | 9330.5   | Detected   | 9753.2   | Detected | 8555.6   | Detected   | 13678.6  | Detected   | Camta2        | 1.466009324 | 0.91694979 | 1.40247303 | 0.8772095 |
| A_65_P0909 | 7628.9   | Detected   | 7297.5   | Detected | 8888.1   | Detected   | 11183.6  | Detected   | Arih2         | 1.465951841 | 1.16505656 | 1.53252484 | 1.2179651 |
| A_66_P1391 | 83.7     | Detected   | 71.8     | Detected | 110.5    | Detected   | 122.7    | Detected   | Hras1         | 1.465949821 | 1.32019116 | 1.70891365 | 1.5389972 |
| A_55_P2014 | 147.7    | Detected   | 162.2    | Detected | 201.9    | Detected   | 216.5    | Detected   | B430105G09Rik | 1.465809072 | 1.36696005 | 1.33477189 | 1.2447596 |
| A_55_P1969 | 13207    | Detected   | 15614.5  | Detected | 10777.5  | Detected   | 19357.2  | Detected   | Get4          | 1.465677292 | 0.81604452 | 1.23969387 | 0.6902238 |
| A_55_P2058 | 5232     | Detected   | 5632.7   | Detected | 5098.4   | Detected   | 7668.4   | Detected   | Ephb4         | 1.465672783 | 0.97446483 | 1.3614075  | 0.9051432 |
| A_55_P2028 | 2622.6   | Detected   | 2363.5   | Detected | 2111.2   | Detected   | 3843.7   | Detected   | Rnf170        | 1.46560665  | 0.80500267 | 1.62627459 | 0.8932515 |
| A_55_P2185 | 20974.5  | Detected   | 24804.7  | Detected | 20038.8  | Detected   | 30739.7  | Detected   | Cdk8          | 1.465574865 | 0.95538869 | 1.23926917 | 0.807863  |
| A_51_P2846 | 76.7     | Detected   | 107.1    | Detected | 77.6     | Detected   | 112.4    | Detected   | Aak1          | 1.465449804 | 1.01173403 | 1.04948646 | 0.7245565 |
| A_52_P3008 | 70.7     | Detected   | 78       | Detected | 67.8     | Detected   | 103.6    | Detected   | D130020L05Rik | 1.465346535 | 0.95898161 | 1.32820513 | 0.8692308 |
| A_55_P2000 | 333.3    | Detected   | 388.3    | Detected | 318.1    | Detected   | 488.4    | Detected   | Ccdc144b      | 1.465346535 | 0.95439544 | 1.25779037 | 0.8192119 |
| A_55_P2154 | 6777.1   | Detected   | 6307.9   | Detected | 8436.8   | Detected   | 9930.3   | Detected   | Ncapd3        | 1.465272757 | 1.24489826 | 1.57426402 | 1.3374974 |
| A_55_P2000 | 102062   | Detected   | 113479.2 | Detected | 156637.3 | Detected   | 149515.3 | Detected   | Atp5l         | 1.464945817 | 1.53472693 | 1.31755687 | 1.3803173 |
| A_55_P2237 | 11.4     | Not Detect | 18.8     | Detected | 6.9      | Not Detect | 16.7     | Not Detect | 1700008O03Rik | 1.464912281 | 0.60526316 | 0.88829787 | 0.3670213 |
| A_52_P4013 | 1382.7   | Detected   | 1782     | Detected | 1575.7   | Detected   | 2025.5   | Detected   | Capza1        | 1.464887539 | 1.13958198 | 1.13664422 | 0.8842312 |
| A_51_P3999 | 16764.7  | Detected   | 21051.7  | Detected | 12768.6  | Detected   | 24557.4  | Detected   | Myo9b         | 1.464827882 | 0.76163606 | 1.16652812 | 0.6065353 |
| A_55_P1963 | 167.2    | Detected   | 183.8    | Detected | 164.9    | Detected   | 244.9    | Detected   | Sycn          | 1.464712919 | 0.98624402 | 1.33242655 | 0.8971708 |
| A_55_P2098 | 3472.2   | Detected   | 2888.4   | Detected | 3427     | Detected   | 5084.7   | Detected   | Bloc1s4       | 1.464402972 | 0.98698232 | 1.76038637 | 1.18647   |
| A_55_P2017 | 81       | Detected   | 124.1    | Detected | 110.7    | Detected   | 118.6    | Detected   | D16Ert472e    | 1.464197531 | 1.36666667 | 0.9556809  | 0.8920226 |
| A_55_P2012 | 416.7    | Detected   | 450.7    | Detected | 281.5    | Detected   | 610.1    | Detected   | LOC101056104  | 1.46412287  | 0.67554596 | 1.35367207 | 0.624584  |
| A_55_P2003 | 6.9      | Not Detect | 45.7     | Detected | 3.6      | Not Detect | 10.1     | Not Detect | Sh2d7         | 1.463768116 | 0.52173913 | 0.22100656 | 0.0787746 |
| A_52_P5956 | 4756.2   | Detected   | 7438.9   | Detected | 5112.5   | Detected   | 6961.8   | Detected   | Smim7         | 1.46373155  | 1.07491275 | 0.93586417 | 0.6872656 |
| A_51_P2270 | 31.7     | Detected   | 39.6     | Detected | 37.1     | Detected   | 46.4     | Detected   | Mdh1b         | 1.463722397 | 1.170347   | 1.17171717 | 0.9368687 |
| A_51_P5040 | 206.2    | Detected   | 217.3    | Detected | 225.1    | Detected   | 301.8    | Detected   | Spa17         | 1.463627546 | 1.09165858 | 1.38886332 | 1.0358951 |
| A_51_P2113 | 1799.3   | Detected   | 1886.9   | Detected | 2208.4   | Detected   | 2633.4   | Detected   | Nudt2         | 1.463569166 | 1.2273662  | 1.39562245 | 1.1703853 |
| A_51_P1952 | 27202.7  | Detected   | 24346.8  | Detected | 38752.7  | Detected   | 39808.7  | Detected   | Fam149a       | 1.463409882 | 1.42459021 | 1.63506909 | 1.5916958 |
| A_51_P2960 | 3958.3   | Detected   | 5421.9   | Detected | 3613.8   | Detected   | 5792.5   | Detected   | Upf1          | 1.463380744 | 0.91296769 | 1.06835242 | 0.6665191 |
| A_52_P6766 | 54.6     | Detected   | 52.6     | Detected | 31.8     | Detected   | 79.9     | Detected   | Zfp518a       | 1.463369963 | 0.58241758 | 1.51901141 | 0.6045627 |
| A_55_P2007 | 99.3     | Detected   | 139.7    | Detected | 93.3     | Detected   | 145.3    | Detected   | Iqcg          | 1.463242699 | 0.93957704 | 1.0400859  | 0.6678597 |
| A_55_P2027 | 178223.1 | Detected   | 189406.7 | Detected | 218813.7 | Detected   | 260780.3 | Detected   | Myl6          | 1.463223903 | 1.22775162 | 1.37682722 | 1.1552585 |
| A_52_P3721 | 619.2    | Detected   | 1005     | Detected | 897.4    | Detected   | 906      | Detected   | Rpsa          | 1.463178295 | 1.44928941 | 0.90149254 | 0.8929353 |
| A_55_P2098 | 2922.3   | Detected   | 3555.8   | Detected | 4141.2   | Detected   | 4274.9   | Detected   | St7l          | 1.462854601 | 1.41710297 | 1.20223297 | 1.1646324 |
| A_55_P2404 | 1345     | Detected   | 1516     | Detected | 1009.8   | Detected   | 1967.4   | Detected   | Rps6ka3       | 1.462750929 | 0.75078067 | 1.29775726 | 0.666095  |
| A_51_P4771 | 3869.3   | Detected   | 4619.7   | Detected | 3289.6   | Detected   | 5659.8   | Detected   | Pmaip1        | 1.462745199 | 0.85017962 | 1.22514449 | 0.7120809 |
| A_55_P2085 | 159.5    | Detected   | 171.9    | Detected | 168.9    | Detected   | 233.3    | Detected   | Mia           | 1.462695925 | 1.05893417 | 1.35718441 | 0.982548  |

|            |                   |                  |                  |                   |               |             |            |            |           |
|------------|-------------------|------------------|------------------|-------------------|---------------|-------------|------------|------------|-----------|
| A_55_P1999 | 6.7 Not Detect    | 7.3 Not Detect   | 15.9 Detected    | 9.8 Not Detect    | AA474408      | 1.462686567 | 2.37313433 | 1.34246575 | 2.1780822 |
| A_55_P2029 | 9575.6 Detected   | 10307.5 Detected | 15813.4 Detected | 14005.3 Detected  | Dtd1          | 1.462602866 | 1.65142654 | 1.35874848 | 1.5341644 |
| A_51_P2073 | 22.7 Detected     | 14.7 Not Detect  | 22.3 Detected    | 33.2 Not Detect   | Tgm6          | 1.462555066 | 0.98237885 | 2.2585034  | 1.5170068 |
| A_55_P2078 | 2302.9 Detected   | 2168.4 Detected  | 2190.5 Detected  | 3367.2 Detected   | Ddx46         | 1.462156411 | 0.95119198 | 1.55285003 | 1.0101918 |
| A_51_P2358 | 12465.7 Detected  | 14217.3 Detected | 16256.9 Detected | 18226.6 Detected  | Guk1          | 1.462140112 | 1.30413053 | 1.28200151 | 1.143459  |
| A_55_P2340 | 217.5 Detected    | 287.2 Detected   | 234.2 Detected   | 318 Detected      | C630001G18Rik | 1.462068966 | 1.07678161 | 1.10724234 | 0.8154596 |
| A_55_P2202 | 40.7 Detected     | 48.9 Detected    | 93.4 Detected    | 59.5 Detected     | 0710001A04Rik | 1.461916462 | 2.29484029 | 1.21676892 | 1.9100204 |
| A_55_P2043 | 3089.6 Detected   | 2613.4 Detected  | 3210.6 Detected  | 4516.6 Detected   | Srd5a3        | 1.461872087 | 1.03916365 | 1.72824673 | 1.2285146 |
| A_52_P3065 | 799.7 Detected    | 1084.7 Detected  | 699 Detected     | 1169 Detected     | Emc1          | 1.461798174 | 0.87407778 | 1.07771734 | 0.6444178 |
| A_55_P2002 | 3302.7 Detected   | 4144.4 Detected  | 3159.6 Detected  | 4827.7 Detected   | Ephx2         | 1.461743422 | 0.95667181 | 1.16487308 | 0.7623781 |
| A_55_P2026 | 2315.5 Detected   | 1788.4 Detected  | 2213.8 Detected  | 3384.2 Detected   | Gys1          | 1.461541784 | 0.9560786  | 1.89230597 | 1.2378662 |
| A_55_P1954 | 8376.1 Detected   | 7692.1 Detected  | 10456.7 Detected | 12239.9 Detected  | D1Erd622e     | 1.461288667 | 1.24839723 | 1.59122996 | 1.3594077 |
| A_55_P2031 | 110852.9 Detected | 92361.4 Detected | 51181.9 Detected | 161974.2 Detected | Ly6e          | 1.461163398 | 0.46171007 | 1.75370014 | 0.5541482 |
| A_51_P4005 | 4244.3 Detected   | 6176.1 Detected  | 5324.9 Detected  | 6200.8 Detected   | Anp32e        | 1.460971185 | 1.25460029 | 1.00399929 | 0.8621784 |
| A_66_P1390 | 114.6 Detected    | 119.5 Detected   | 155.9 Detected   | 167.4 Detected    | Efcab9        | 1.460732984 | 1.36038394 | 1.40083682 | 1.3046025 |
| A_52_P1672 | 11716.1 Detected  | 13319.8 Detected | 14600.1 Detected | 17112.2 Detected  | Mthfd1l       | 1.460571351 | 1.246157   | 1.28471899 | 1.0961201 |
| A_55_P2176 | 7685.2 Detected   | 9000 Detected    | 9212.8 Detected  | 11223.1 Detected  | 0610010K14Rik | 1.460352366 | 1.19877167 | 1.24701111 | 1.0236444 |
| A_55_P2431 | 6107 Detected     | 5464.2 Detected  | 5803.3 Detected  | 8918.2 Detected   | Srpk2         | 1.460324218 | 0.95027018 | 1.63211449 | 1.0620585 |
| A_55_P2041 | 4962.2 Detected   | 5095.3 Detected  | 5302.8 Detected  | 7242.9 Detected   | Vps51         | 1.459614687 | 1.06863891 | 1.42148647 | 1.0407238 |
| A_51_P2842 | 25921.6 Detected  | 20491.7 Detected | 30257.6 Detected | 37832.4 Detected  | Tmed3         | 1.459493241 | 1.16727363 | 1.84623043 | 1.4765783 |
| A_55_P1958 | 212.9 Detected    | 243.4 Detected   | 217.5 Detected   | 310.7 Detected    | Aoc3          | 1.459370597 | 1.02160639 | 1.27649959 | 0.8935908 |
| A_51_P3952 | 31782.3 Detected  | 37503.3 Detected | 29277.9 Detected | 46377.6 Detected  | Ccz1          | 1.459227306 | 0.92120142 | 1.23662718 | 0.7806753 |
| A_55_P1987 | 439.4 Detected    | 549 Detected     | 509.1 Detected   | 641.1 Detected    | Fuom          | 1.459035048 | 1.1586254  | 1.16775956 | 0.9273224 |
| A_55_P2281 | 54.9 Detected     | 167.7 Detected   | 29.2 Detected    | 80.1 Detected     | Bnc2          | 1.459016393 | 0.53187614 | 0.47763864 | 0.1741205 |
| A_55_P2042 | 5525.4 Detected   | 5958.4 Detected  | 8374.4 Detected  | 8061.3 Detected   | Pigo          | 1.458953198 | 1.51561878 | 1.35293032 | 1.405478  |
| A_51_P3516 | 907.3 Detected    | 1308.7 Detected  | 1639.5 Detected  | 1323.3 Detected   | Mrpl35        | 1.458503251 | 1.80700981 | 1.01115611 | 1.2527699 |
| A_55_P2026 | 59978.7 Detected  | 70749.8 Detected | 90059.4 Detected | 87476.6 Detected  | Atp5l         | 1.458461087 | 1.50152304 | 1.23642187 | 1.272928  |
| A_55_P2012 | 15237 Detected    | 15147.4 Detected | 26191.1 Detected | 22222.1 Detected  | Rtkn          | 1.458430137 | 1.71891448 | 1.46705705 | 1.7290822 |
| A_55_P2047 | 506.3 Detected    | 520.1 Detected   | 667.8 Detected   | 738.4 Detected    | Zfp809        | 1.458423859 | 1.31898084 | 1.41972698 | 1.2839838 |
| A_55_P2055 | 3256.3 Detected   | 4495.2 Detected  | 3505.7 Detected  | 4748.9 Detected   | Scaf11        | 1.458373    | 1.07658999 | 1.05643798 | 0.7798763 |
| A_52_P2278 | 210.1 Detected    | 181.2 Detected   | 174.8 Detected   | 306.4 Detected    | Cenpf         | 1.458353165 | 0.83198477 | 1.69094923 | 0.9646799 |
| A_51_P1557 | 601.8 Detected    | 695.5 Detected   | 808.7 Detected   | 877.6 Detected    | Scyl3         | 1.458291791 | 1.34380193 | 1.26182602 | 1.1627606 |
| A_55_P1978 | 496.3 Detected    | 633.6 Detected   | 760.6 Detected   | 723.7 Detected    | Pet112        | 1.458190611 | 1.5325408  | 1.14220328 | 1.2004419 |
| A_55_P2106 | 4765.7 Detected   | 6356.9 Detected  | 5759.5 Detected  | 6948.1 Detected   | Nmnat3        | 1.457939023 | 1.2085318  | 1.09300131 | 0.9060234 |
| A_55_P2178 | 29451.5 Detected  | 24369.5 Detected | 29134 Detected   | 42930.2 Detected  | Inpp1l        | 1.457657505 | 0.98921956 | 1.76163647 | 1.1955108 |
| A_51_P3204 | 1507.1 Detected   | 1465 Detected    | 2316.6 Detected  | 2196.8 Detected   | Mcee          | 1.457633866 | 1.53712428 | 1.49952218 | 1.5812969 |
| A_55_P1998 | 499.1 Detected    | 531.2 Detected   | 604.6 Detected   | 727.5 Detected    | Aplf          | 1.457623723 | 1.21138048 | 1.36954066 | 1.1381777 |
| A_55_P2137 | 7885.8 Detected   | 7545.9 Detected  | 8076.8 Detected  | 11494.3 Detected  | Mpv17         | 1.457594664 | 1.02422075 | 1.52325104 | 1.0703561 |
| A_55_P2006 | 284.8 Detected    | 5285 Detected    | 215.7 Detected   | 415.1 Detected    | Krt15         | 1.457514045 | 0.7573736  | 0.07854305 | 0.0408136 |
| A_55_P2242 | 61 Detected       | 71.4 Detected    | 85.5 Detected    | 88.9 Detected     | 4930466K18Rik | 1.457377049 | 1.40163934 | 1.24509804 | 1.197479  |

|            |          |            |          |            |          |            |          |            |               |             |            |            |           |
|------------|----------|------------|----------|------------|----------|------------|----------|------------|---------------|-------------|------------|------------|-----------|
| A_55_P1988 | 2284.3   | Detected   | 2286.2   | Detected   | 3151.3   | Detected   | 3328.8   | Detected   | Hmbs          | 1.457251674 | 1.37954734 | 1.45604059 | 1.3784008 |
| A_55_P2085 | 74.8     | Detected   | 68.8     | Detected   | 67       | Detected   | 109      | Detected   | Fam83a        | 1.457219251 | 0.89572193 | 1.58430233 | 0.9738372 |
| A_55_P1968 | 5586.6   | Detected   | 6232.6   | Detected   | 5419     | Detected   | 8138     | Detected   | Tle1          | 1.456699961 | 0.96999964 | 1.30571511 | 0.8694606 |
| A_55_P2225 | 42.7     | Detected   | 50.3     | Detected   | 21.2     | Detected   | 62.2     | Detected   | 4831440D22Rik | 1.456674473 | 0.49648712 | 1.23658052 | 0.4214712 |
| A_51_P4421 | 11898    | Detected   | 13212.4  | Detected   | 11143.3  | Detected   | 17331.4  | Detected   | Itfg1         | 1.456664986 | 0.93656917 | 1.3117526  | 0.8433971 |
| A_55_P2078 | 979.5    | Detected   | 1050.3   | Detected   | 1297.5   | Detected   | 1426.8   | Detected   | Gm2444        | 1.456661562 | 1.32465544 | 1.35846901 | 1.2353613 |
| A_51_P2992 | 10029    | Detected   | 9425.5   | Detected   | 15021.5  | Detected   | 14607.3  | Detected   | Impa2         | 1.456506132 | 1.49780636 | 1.54976394 | 1.5937086 |
| A_55_P2073 | 1092.6   | Detected   | 1566.2   | Detected   | 1414.9   | Detected   | 1591.3   | Detected   | Mecr          | 1.456434194 | 1.29498444 | 1.01602605 | 0.9033968 |
| A_55_P2045 | 8494.3   | Detected   | 15944.5  | Detected   | 7368.1   | Detected   | 12371.1  | Detected   | Pes1          | 1.456400174 | 0.86741697 | 0.7758851  | 0.4621092 |
| A_55_P2004 | 529.2    | Detected   | 967.8    | Detected   | 673.2    | Detected   | 770.7    | Detected   | Klra1         | 1.456349206 | 1.27210884 | 0.79634222 | 0.6955983 |
| A_55_P2142 | 51.5     | Detected   | 60.2     | Detected   | 55.8     | Detected   | 75       | Detected   | Pifo          | 1.45631068  | 1.08349515 | 1.24584718 | 0.9269103 |
| A_55_P2303 | 103      | Detected   | 122.4    | Detected   | 106      | Detected   | 150      | Detected   | AW413774      | 1.45631068  | 1.02912621 | 1.2254902  | 0.8660131 |
| A_55_P2163 | 174093.2 | Detected   | 192171.2 | Detected   | 238472.7 | Detected   | 253520.4 | Detected   | Crip1         | 1.456233787 | 1.36979905 | 1.31924243 | 1.2409388 |
| A_51_P1083 | 177416.8 | Detected   | 239652.5 | Detected   | 180050.3 | Detected   | 258305.3 | Detected   | Slc25a4       | 1.455923565 | 1.01484358 | 1.0778327  | 0.7512974 |
| A_52_P1893 | 99.6     | Detected   | 109.4    | Detected   | 90.3     | Detected   | 145      | Detected   | 4930404N11Rik | 1.455823293 | 0.90662651 | 1.32541133 | 0.8254113 |
| A_52_P4583 | 4801.1   | Detected   | 5517.9   | Detected   | 5599.7   | Detected   | 6988.7   | Detected   | Pafah1b2      | 1.455645581 | 1.16633688 | 1.26655068 | 1.0148245 |
| A_55_P2296 | 67.6     | Detected   | 63.6     | Detected   | 91.4     | Detected   | 98.4     | Detected   | 4833420D23Rik | 1.455621302 | 1.35207101 | 1.54716981 | 1.4371069 |
| A_55_P2080 | 57437.4  | Detected   | 58430.7  | Detected   | 80623.1  | Detected   | 83606.2  | Detected   | Mrpl4         | 1.455605581 | 1.40366904 | 1.43086083 | 1.3798072 |
| A_51_P2174 | 3062.8   | Detected   | 4530     | Detected   | 4577.5   | Detected   | 4458.1   | Detected   | 2410016O06Rik | 1.455563537 | 1.49454747 | 0.98412804 | 1.0104857 |
| A_52_P3813 | 6686.4   | Detected   | 7441.9   | Detected   | 7289.5   | Detected   | 9732.2   | Detected   | Gins2         | 1.455521656 | 1.09019801 | 1.30775743 | 0.9795214 |
| A_55_P2088 | 27489    | Detected   | 27138.1  | Detected   | 42656.7  | Detected   | 40009.8  | Detected   | Foxp1         | 1.455484012 | 1.55177344 | 1.47430365 | 1.5718381 |
| A_55_P2124 | 922.4    | Detected   | 973.1    | Detected   | 1313.3   | Detected   | 1342.4   | Detected   | Zfp661        | 1.455333912 | 1.42378578 | 1.37950879 | 1.3496044 |
| A_52_P9391 | 16359.4  | Detected   | 15957.6  | Detected   | 11545.5  | Detected   | 23807.1  | Detected   | Nrp2          | 1.455255083 | 0.70574104 | 1.49189728 | 0.7235111 |
| A_52_P2103 | 24692.8  | Detected   | 29089.6  | Detected   | 28127    | Detected   | 35932.5  | Detected   | Ndufb6        | 1.455181267 | 1.13907698 | 1.23523527 | 0.9669091 |
| A_52_P2192 | 12921.6  | Detected   | 12880.1  | Detected   | 16097.8  | Detected   | 18802.4  | Detected   | Frmf8         | 1.455113918 | 1.24580547 | 1.45980233 | 1.2498195 |
| A_51_P2428 | 8159.7   | Detected   | 4398.1   | Detected   | 13709.7  | Detected   | 11873.2  | Detected   | Akr1c12       | 1.455102516 | 1.68017207 | 2.69962029 | 3.117187  |
| A_51_P4521 | 16.7     | Detected   | 8.7      | Not Detect | 18.8     | Detected   | 24.3     | Not Detect | Mzb1          | 1.45508982  | 1.1257485  | 2.79310345 | 2.1609195 |
| A_52_P4365 | 301.5    | Detected   | 318.1    | Detected   | 338.7    | Detected   | 438.7    | Detected   | Ddx59         | 1.455058043 | 1.12338308 | 1.37912606 | 1.0647595 |
| A_52_P3702 | 266      | Detected   | 312.7    | Detected   | 284.5    | Detected   | 387      | Detected   | Jarid2        | 1.454887218 | 1.06954887 | 1.23760793 | 0.9098177 |
| A_55_P2119 | 107.8    | Detected   | 76.5     | Detected   | 99.6     | Detected   | 156.8    | Detected   | Olfir96       | 1.454545455 | 0.92393321 | 2.0496732  | 1.3019608 |
| A_55_P2064 | 83.6     | Detected   | 87.5     | Detected   | 84       | Detected   | 121.6    | Detected   | Ctrc          | 1.454545455 | 1.00478469 | 1.38971429 | 0.96      |
| A_66_P1195 | 9.9      | Not Detect | 89       | Detected   | 37.6     | Detected   | 14.4     | Not Detect | Tuba8         | 1.454545455 | 3.7979798  | 0.16179775 | 0.4224719 |
| A_52_P1092 | 7.7      | Not Detect | 76.6     | Detected   | 50.4     | Detected   | 11.2     | Not Detect | Leprel1       | 1.454545455 | 6.54545455 | 0.1462141  | 0.6579634 |
| A_55_P2064 | 1179.8   | Detected   | 936      | Detected   | 1627.5   | Detected   | 1716     | Detected   | Msrb1         | 1.454483811 | 1.3794711  | 1.83333333 | 1.7387821 |
| A_51_P1531 | 20351.7  | Detected   | 27726.5  | Detected   | 18057.3  | Detected   | 29600.3  | Detected   | Cyb5r3        | 1.454438696 | 0.88726249 | 1.06758156 | 0.651265  |
| A_66_P1271 | 21.8     | Detected   | 61.7     | Detected   | 31.7     | Detected   | 31.7     | Not Detect | Cyp2u1        | 1.45412844  | 1.45412844 | 0.51377634 | 0.5137763 |
| A_55_P2004 | 6437.4   | Detected   | 8525.8   | Detected   | 8641.9   | Detected   | 9359.4   | Detected   | Ppih          | 1.453909964 | 1.34245192 | 1.09777382 | 1.0136175 |
| A_55_P2100 | 1758.4   | Detected   | 1579.3   | Detected   | 1989.6   | Detected   | 2556.4   | Detected   | Dnm2          | 1.453821656 | 1.13148317 | 1.61869183 | 1.2597986 |
| A_51_P1416 | 234.7    | Detected   | 378.1    | Detected   | 183.5    | Detected   | 341.2    | Detected   | Pskh1         | 1.453770771 | 0.78184917 | 0.90240677 | 0.4853213 |
| A_55_P2034 | 10.8     | Not Detect | 36.1     | Detected   | 8.9      | Not Detect | 15.7     | Not Detect | Qrfpr         | 1.453703704 | 0.82407407 | 0.43490305 | 0.2465374 |



|            |                  |                  |                  |                  |               |             |            |            |           |
|------------|------------------|------------------|------------------|------------------|---------------|-------------|------------|------------|-----------|
| A_51_P1719 | 9.7 Not Detect   | 29.5 Detected    | 3.7 Not Detect   | 14.1 Not Detect  | A630033H20Rik | 1.453608247 | 0.3814433  | 0.4779661  | 0.1254237 |
| A_55_P2025 | 47.4 Detected    | 77.1 Detected    | 50.9 Detected    | 68.9 Detected    | Adam5         | 1.453586498 | 1.07383966 | 0.89364462 | 0.6601816 |
| A_51_P4684 | 640.1 Detected   | 741.2 Detected   | 799.2 Detected   | 930.4 Detected   | Narg2         | 1.453522887 | 1.24855491 | 1.25526174 | 1.0782515 |
| A_55_P2021 | 7.5 Not Detect   | 20.4 Detected    | 5.2 Not Detect   | 10.9 Not Detect  | C87414        | 1.453333333 | 0.69333333 | 0.53431373 | 0.254902  |
| A_55_P1960 | 5575.5 Detected  | 3838.4 Detected  | 4866.2 Detected  | 8102.9 Detected  | Dnase111      | 1.453304636 | 0.87278271 | 2.1110098  | 1.2677678 |
| A_51_P4238 | 3979.3 Detected  | 4033.5 Detected  | 2867.6 Detected  | 5782.7 Detected  | Smarcd3       | 1.453195286 | 0.72062926 | 1.43366803 | 0.7109458 |
| A_65_P1119 | 3470.4 Detected  | 4799.2 Detected  | 4364 Detected    | 5042.8 Detected  | Flad1         | 1.453088981 | 1.25749193 | 1.05075846 | 0.9093182 |
| A_55_P2030 | 46.8 Detected    | 49.2 Detected    | 60.4 Detected    | 68 Detected      | Srsf2         | 1.452991453 | 1.29059829 | 1.38211382 | 1.2276423 |
| A_51_P1404 | 14.8 Not Detect  | 18.5 Detected    | 8.4 Not Detect   | 21.5 Not Detect  | Zg16          | 1.452702703 | 0.56756757 | 1.16216216 | 0.4540541 |
| A_55_P2048 | 53.9 Detected    | 100.7 Detected   | 81.8 Detected    | 78.3 Detected    | Klra23        | 1.452690167 | 1.51762523 | 0.7775571  | 0.8123138 |
| A_51_P3228 | 19 Detected      | 16.4 Not Detect  | 14.7 Not Detect  | 27.6 Not Detect  | Olfir622      | 1.452631579 | 0.77368421 | 1.68292683 | 0.8963415 |
| A_55_P1971 | 9.5 Not Detect   | 21 Detected      | 10.3 Not Detect  | 13.8 Not Detect  | Bcan          | 1.452631579 | 1.08421053 | 0.65714286 | 0.4904762 |
| A_51_P2416 | 515 Detected     | 590.5 Detected   | 627.8 Detected   | 748.1 Detected   | Tmem194       | 1.452621359 | 1.21902913 | 1.26689246 | 1.0631668 |
| A_51_P1388 | 4842.3 Detected  | 5783.1 Detected  | 3615.6 Detected  | 7034 Detected    | Ccdc102a      | 1.452615493 | 0.74666997 | 1.21630268 | 0.625201  |
| A_55_P2134 | 4210.3 Detected  | 4842.2 Detected  | 3383.6 Detected  | 6115.8 Detected  | Cmip          | 1.452580576 | 0.8036482  | 1.26302094 | 0.6987733 |
| A_55_P2131 | 332.9 Detected   | 5774.5 Detected  | 9.3 Not Detect   | 483.5 Detected   | Kprp          | 1.452388105 | 0.02793632 | 0.08373019 | 0.0016105 |
| A_55_P2097 | 19826.5 Detected | 15990.4 Detected | 18862.7 Detected | 28795 Detected   | C77080        | 1.452349129 | 0.95138829 | 1.80076796 | 1.1796265 |
| A_55_P2088 | 16389.6 Detected | 17972.7 Detected | 12033.8 Detected | 23802.6 Detected | Ash2l         | 1.452299019 | 0.7342339  | 1.3243753  | 0.6695599 |
| A_55_P2104 | 13795.3 Detected | 19854.7 Detected | 12727.3 Detected | 20034 Detected   | Edc4          | 1.452233732 | 0.92258233 | 1.00903061 | 0.641022  |
| A_51_P4201 | 4670.7 Detected  | 5982.3 Detected  | 5870.3 Detected  | 6782.5 Detected  | Emc2          | 1.452137795 | 1.25683516 | 1.13376126 | 0.9812781 |
| A_52_P9050 | 121 Detected     | 71.3 Detected    | 142.5 Detected   | 175.7 Detected   | Mfsd9         | 1.452066116 | 1.17768595 | 2.46423562 | 1.9985975 |
| A_51_P2194 | 6867.8 Detected  | 8050.4 Detected  | 8317 Detected    | 9972.3 Detected  | Plcl2         | 1.452037042 | 1.21101372 | 1.23873348 | 1.0331164 |
| A_51_P1446 | 143.8 Detected   | 161.8 Detected   | 155.1 Detected   | 208.8 Detected   | Vps13b        | 1.45201669  | 1.07858136 | 1.29048208 | 0.9585909 |
| A_55_P2165 | 10.4 Not Detect  | 19.6 Detected    | 15.5 Not Detect  | 15.1 Not Detect  | Lrrtm4        | 1.451923077 | 1.49038462 | 0.77040816 | 0.7908163 |
| A_55_P2081 | 60023.9 Detected | 72878.7 Detected | 64756.8 Detected | 87149.2 Detected | Atp5j2        | 1.451908323 | 1.07885026 | 1.19581167 | 0.8885559 |
| A_55_P1972 | 2214.6 Detected  | 3794.3 Detected  | 2993.4 Detected  | 3215.1 Detected  | Trmt11        | 1.451774587 | 1.35166622 | 0.84734997 | 0.7889202 |
| A_55_P2123 | 1190 Detected    | 1126.1 Detected  | 1089.6 Detected  | 1727.6 Detected  | Rhoh          | 1.451764706 | 0.91563025 | 1.53414439 | 0.9675872 |
| A_52_P6546 | 1316.9 Detected  | 1987.7 Detected  | 1986.1 Detected  | 1911.8 Detected  | Znhit3        | 1.451742729 | 1.50816311 | 0.96181516 | 0.999195  |
| A_55_P1971 | 15232.2 Detected | 12646.5 Detected | 13153.9 Detected | 22113 Detected   | Exoc1         | 1.451727262 | 0.86355878 | 1.74854703 | 1.0401218 |
| A_51_P2804 | 19641.4 Detected | 26250.1 Detected | 30341.2 Detected | 28513.8 Detected | Ndufa9        | 1.451719328 | 1.5447575  | 1.08623586 | 1.1558508 |
| A_55_P2016 | 6248.5 Detected  | 4986 Detected    | 5244.9 Detected  | 9070.5 Detected  | Nsd1          | 1.451628391 | 0.83938545 | 1.81919374 | 1.0519254 |
| A_55_P2025 | 732.6 Detected   | 690.8 Detected   | 943.7 Detected   | 1063.4 Detected  | Cep55         | 1.451542452 | 1.28815179 | 1.53937464 | 1.3660973 |
| A_55_P1966 | 132 Detected     | 290.9 Detected   | 180.4 Detected   | 191.6 Detected   | Nme5          | 1.451515152 | 1.36666667 | 0.65864558 | 0.6201444 |
| A_55_P2085 | 1218.8 Detected  | 1171.9 Detected  | 1110.5 Detected  | 1769.1 Detected  | Dennd4b       | 1.451509682 | 0.91114211 | 1.5095998  | 0.9476065 |
| A_51_P3857 | 2272.8 Detected  | 2980.6 Detected  | 2290.9 Detected  | 3298.8 Detected  | Eif2ak1       | 1.451425554 | 1.00796375 | 1.10675703 | 0.7686036 |
| A_52_P5387 | 465 Detected     | 434.7 Detected   | 685.1 Detected   | 674.9 Detected   | Tada3         | 1.451397849 | 1.47333333 | 1.55256499 | 1.5760294 |
| A_55_P2008 | 202.5 Detected   | 283.5 Detected   | 226.8 Detected   | 293.9 Detected   | Dnd1          | 1.451358025 | 1.12       | 1.0366843  | 0.8       |
| A_55_P1980 | 6219.7 Detected  | 6026 Detected    | 5966.2 Detected  | 9026.7 Detected  | Purb          | 1.451307941 | 0.95924241 | 1.49795885 | 0.9900763 |
| A_51_P3775 | 4239.4 Detected  | 4272.6 Detected  | 4865.4 Detected  | 6152.5 Detected  | Sts           | 1.451266689 | 1.14766241 | 1.4399897  | 1.1387446 |
| A_55_P1977 | 197.5 Detected   | 168.3 Detected   | 164.7 Detected   | 286.6 Detected   | Gm5833        | 1.451139241 | 0.83392405 | 1.70291147 | 0.9786096 |

|            |         |          |         |          |         |          |         |          |               |             |            |            |           |
|------------|---------|----------|---------|----------|---------|----------|---------|----------|---------------|-------------|------------|------------|-----------|
| A_55_P2101 | 2988.6  | Detected | 1564.6  | Detected | 2306.7  | Detected | 4336.7  | Detected | Ppfia3        | 1.451080774 | 0.77183297 | 2.77176275 | 1.4743065 |
| A_55_P2067 | 45.9    | Detected | 61.9    | Detected | 41.8    | Detected | 66.6    | Detected | Phykpl        | 1.450980392 | 0.91067538 | 1.07592892 | 0.6752827 |
| A_55_P2000 | 2314.8  | Detected | 3728.1  | Detected | 2373.9  | Detected | 3358.7  | Detected | Rbm34         | 1.450967686 | 1.02553136 | 0.90091468 | 0.6367587 |
| A_52_P1345 | 2349    | Detected | 2478.1  | Detected | 2714    | Detected | 3408    | Detected | Cd2bp2        | 1.45083014  | 1.15538527 | 1.37524717 | 1.0951939 |
| A_51_P3272 | 552.7   | Detected | 501.9   | Detected | 541     | Detected | 801.8   | Detected | Lenep         | 1.45069658  | 0.97883119 | 1.59752939 | 1.077904  |
| A_52_P2541 | 1329.7  | Detected | 887.9   | Detected | 781.4   | Detected | 1928.8  | Detected | Irgq          | 1.450552756 | 0.58765135 | 2.1723167  | 0.8800541 |
| A_55_P2061 | 593.1   | Detected | 757.8   | Detected | 608     | Detected | 860.3   | Detected | Fnta          | 1.450514247 | 1.02512224 | 1.13525996 | 0.8023225 |
| A_55_P1959 | 56.4    | Detected | 41.4    | Detected | 36      | Detected | 81.8    | Detected | 5031425E22Rik | 1.45035461  | 0.63829787 | 1.97584541 | 0.8695652 |
| A_51_P4488 | 3050.1  | Detected | 3423.2  | Detected | 3129.7  | Detected | 4423.7  | Detected | Zfp90         | 1.45034589  | 1.0260975  | 1.29227039 | 0.9142615 |
| A_52_P1238 | 549.6   | Detected | 659.5   | Detected | 568     | Detected | 797.1   | Detected | Rab21         | 1.450327511 | 1.03347889 | 1.20864291 | 0.8612585 |
| A_55_P2054 | 109.7   | Detected | 102.9   | Detected | 112.7   | Detected | 159.1   | Detected | Layn          | 1.450319052 | 1.02734731 | 1.54616132 | 1.0952381 |
| A_52_P4857 | 915.6   | Detected | 1230.6  | Detected | 1092.9  | Detected | 1327.6  | Detected | Zdhhc17       | 1.449978156 | 1.19364351 | 1.07882334 | 0.8881034 |
| A_51_P1841 | 4285.9  | Detected | 4539.4  | Detected | 4851.6  | Detected | 6214.4  | Detected | Smarcd2       | 1.449963835 | 1.13199095 | 1.3689915  | 1.0687756 |
| A_55_P1980 | 12815.8 | Detected | 10817.4 | Detected | 14911.7 | Detected | 18582.1 | Detected | Sidt2         | 1.449936797 | 1.16354032 | 1.71779725 | 1.3784921 |
| A_52_P8080 | 2111    | Detected | 2168.4  | Detected | 2276.7  | Detected | 3060.6  | Detected | Syncrip       | 1.449834202 | 1.0784936  | 1.41145545 | 1.0499447 |
| A_52_P2326 | 189     | Detected | 267.2   | Detected | 215.6   | Detected | 274     | Detected | Rhot1         | 1.44973545  | 1.14074074 | 1.0254491  | 0.8068862 |
| A_52_P4265 | 376.7   | Detected | 499.9   | Detected | 476     | Detected | 546.1   | Detected | Abhd14a       | 1.449694717 | 1.26360499 | 1.09241848 | 0.9521904 |
| A_52_P3829 | 663.5   | Detected | 875.4   | Detected | 549.5   | Detected | 961.8   | Detected | Champ1        | 1.449585531 | 0.82818387 | 1.09869774 | 0.627713  |
| A_55_P2045 | 100.8   | Detected | 87.9    | Detected | 95.9    | Detected | 146.1   | Detected | Dll3          | 1.449404762 | 0.95138889 | 1.66211604 | 1.0910125 |
| A_55_P2157 | 473.1   | Detected | 673.9   | Detected | 747.7   | Detected | 685.7   | Detected | Gm10734       | 1.449376453 | 1.58042697 | 1.01751002 | 1.1095118 |
| A_52_P2316 | 567.3   | Detected | 788.2   | Detected | 982.8   | Detected | 822.2   | Detected | Oxsm          | 1.449321347 | 1.73241671 | 1.04313626 | 1.2468917 |
| A_51_P4938 | 3852.3  | Detected | 5395.8  | Detected | 7096.9  | Detected | 5582.5  | Detected | Katna1        | 1.449134283 | 1.84225008 | 1.03460099 | 1.3152637 |
| A_55_P2049 | 1098.2  | Detected | 1411.1  | Detected | 1482.9  | Detected | 1591.1  | Detected | Ppih          | 1.448825351 | 1.35030049 | 1.12756006 | 1.0508823 |
| A_55_P2107 | 20092.8 | Detected | 21309.1 | Detected | 15131.1 | Detected | 29103.6 | Detected | Fat1          | 1.44845915  | 0.7530608  | 1.36578269 | 0.7100769 |
| A_51_P1002 | 254.7   | Detected | 253.9   | Detected | 288.8   | Detected | 368.9   | Detected | Stx3          | 1.448370632 | 1.133883   | 1.45293423 | 1.1374557 |
| A_52_P6727 | 252.6   | Detected | 314.3   | Detected | 266.9   | Detected | 365.8   | Detected | E430018J23Rik | 1.448139351 | 1.05661124 | 1.16385619 | 0.8491887 |
| A_51_P1000 | 9601.7  | Detected | 8368    | Detected | 13497.1 | Detected | 13904.5 | Detected | Mif4gd        | 1.448128977 | 1.40569899 | 1.66162763 | 1.6129422 |
| A_52_P3464 | 4969.3  | Detected | 3962.9  | Detected | 5008.9  | Detected | 7195.9  | Detected | Tollip        | 1.448071157 | 1.00796893 | 1.8158167  | 1.2639481 |
| A_52_P1486 | 972     | Detected | 915.4   | Detected | 1300.9  | Detected | 1407.2  | Detected | Mettl22       | 1.447736626 | 1.33837449 | 1.53725147 | 1.4211274 |
| A_66_P1011 | 939.3   | Detected | 1248.7  | Detected | 941.9   | Detected | 1359.8  | Detected | Brd7          | 1.4476738   | 1.00276802 | 1.08897253 | 0.7543045 |
| A_55_P2315 | 210.7   | Detected | 131.4   | Detected | 170.2   | Detected | 305     | Detected | 5330431K02Rik | 1.447555766 | 0.80778358 | 2.32115677 | 1.2952816 |
| A_51_P1336 | 41.8    | Detected | 37.1    | Detected | 43      | Detected | 60.5    | Detected | 3110021A11Rik | 1.447368421 | 1.02870813 | 1.63072776 | 1.1590296 |
| A_55_P2106 | 31125.5 | Detected | 29137.4 | Detected | 32520.1 | Detected | 45044.3 | Detected | Gch1          | 1.447183178 | 1.04480571 | 1.54592723 | 1.1160948 |
| A_51_P4464 | 132.4   | Detected | 663.1   | Detected | 437.2   | Detected | 191.6   | Detected | Dok2          | 1.447129909 | 3.3021148  | 0.28894586 | 0.6593274 |
| A_51_P1393 | 40576.8 | Detected | 44166.9 | Detected | 60255.8 | Detected | 58719.3 | Detected | Pcbd1         | 1.4471151   | 1.48498157 | 1.32948656 | 1.3642751 |
| A_55_P2008 | 38450.6 | Detected | 39807   | Detected | 37284.9 | Detected | 55642.1 | Detected | Chmp4b        | 1.447106157 | 0.96968318 | 1.39779687 | 0.9366418 |
| A_51_P4164 | 43840.5 | Detected | 61603.1 | Detected | 54775.9 | Detected | 63441.8 | Detected | Calr          | 1.447104846 | 1.24943602 | 1.02984752 | 0.8891744 |
| A_55_P2026 | 67.1    | Detected | 65.6    | Detected | 68.8    | Detected | 97.1    | Detected | Gal3st2       | 1.44709389  | 1.02533532 | 1.48018293 | 1.0487805 |
| A_52_P2388 | 5171.2  | Detected | 5757.4  | Detected | 8126.9  | Detected | 7482.8  | Detected | Bpnt1         | 1.447014233 | 1.57156946 | 1.29968389 | 1.4115573 |
| A_55_P2120 | 101.8   | Detected | 112.7   | Detected | 75.5    | Detected | 147.3   | Detected | Dleu2         | 1.446954813 | 0.74165029 | 1.30700976 | 0.6699201 |

|            |         |            |         |            |          |          |          |            |               |             |            |            |           |
|------------|---------|------------|---------|------------|----------|----------|----------|------------|---------------|-------------|------------|------------|-----------|
| A_55_P2079 | 3750.4  | Detected   | 2674.8  | Detected   | 2744.4   | Detected | 5426.2   | Detected   | Mpp1          | 1.446832338 | 0.73176195 | 2.02863766 | 1.0260206 |
| A_51_P5018 | 93485.9 | Detected   | 114120  | Detected   | 116808.4 | Detected | 135254.8 | Detected   | Smdt1         | 1.446793581 | 1.24947612 | 1.18519804 | 1.0235577 |
| A_55_P1964 | 291.8   | Detected   | 407.6   | Detected   | 220.1    | Detected | 422.1    | Detected   | Tnks          | 1.446538725 | 0.75428376 | 1.03557409 | 0.5399902 |
| A_55_P1975 | 40532   | Detected   | 42197.6 | Detected   | 47565.4  | Detected | 58630    | Detected   | Dctn1         | 1.446511398 | 1.17352709 | 1.38941551 | 1.1272063 |
| A_55_P1964 | 41.9    | Detected   | 75.2    | Detected   | 36.3     | Detected | 60.6     | Detected   | Slc14a2       | 1.446300716 | 0.86634845 | 0.80585106 | 0.4827128 |
| A_55_P2125 | 2375    | Detected   | 2222.3  | Detected   | 2683.6   | Detected | 3434.8   | Detected   | Gorasp1       | 1.446231579 | 1.12993684 | 1.5456059  | 1.2075777 |
| A_55_P1999 | 1514    | Detected   | 1544.6  | Detected   | 1952.6   | Detected | 2189.4   | Detected   | Prmt3         | 1.446103038 | 1.28969617 | 1.41745436 | 1.2641461 |
| A_51_P1491 | 27.8    | Detected   | 34.7    | Detected   | 48       | Detected | 40.2     | Not Detect | Vezt          | 1.446043165 | 1.72661871 | 1.15850144 | 1.3832853 |
| A_55_P2046 | 9822.8  | Detected   | 12467.7 | Detected   | 13064.7  | Detected | 14203.5  | Detected   | Bnip3l        | 1.445972635 | 1.33003828 | 1.13922375 | 1.0478837 |
| A_55_P2044 | 335.5   | Detected   | 227     | Detected   | 187.3    | Detected | 485.1    | Detected   | Rnase10       | 1.445901639 | 0.55827124 | 2.13700441 | 0.8251101 |
| A_52_P5776 | 23.1    | Detected   | 28.3    | Detected   | 19.5     | Detected | 33.4     | Not Detect | Ednrb         | 1.445887446 | 0.84415584 | 1.18021201 | 0.6890459 |
| A_55_P2128 | 1387.8  | Detected   | 1879.3  | Detected   | 1331.5   | Detected | 2006.4   | Detected   | Cc2d2a        | 1.445741461 | 0.95943219 | 1.06763156 | 0.7085085 |
| A_55_P2083 | 20818.8 | Detected   | 17365.6 | Detected   | 25807.6  | Detected | 30097.7  | Detected   | Alas1         | 1.445698119 | 1.23962957 | 1.73317939 | 1.4861335 |
| A_51_P3614 | 11388.8 | Detected   | 13757.5 | Detected   | 14688.5  | Detected | 16464.7  | Detected   | Arl8b         | 1.445692259 | 1.28973202 | 1.19677994 | 1.0676722 |
| A_55_P2045 | 27.6    | Detected   | 24.7    | Detected   | 29.2     | Detected | 39.9     | Not Detect | Olf901        | 1.445652174 | 1.05797101 | 1.61538462 | 1.1821862 |
| A_55_P2080 | 467.3   | Detected   | 383     | Detected   | 293.1    | Detected | 675.4    | Detected   | LOC101055828  | 1.445324203 | 0.6272202  | 1.76344648 | 0.7652742 |
| A_55_P2015 | 897.4   | Detected   | 1553.4  | Detected   | 654.9    | Detected | 1297     | Detected   | Cyld          | 1.445286383 | 0.72977491 | 0.83494271 | 0.4215913 |
| A_55_P2217 | 291.3   | Detected   | 239.4   | Detected   | 284.2    | Detected | 421      | Detected   | 2900054C01Rik | 1.445245451 | 0.9756265  | 1.75856307 | 1.1871345 |
| A_55_P2000 | 4026.6  | Detected   | 3490.7  | Detected   | 3651.1   | Detected | 5818.8   | Detected   | Stxbp2        | 1.44509015  | 0.90674514 | 1.66694359 | 1.0459507 |
| A_55_P1989 | 3890.7  | Detected   | 5421.2  | Detected   | 3127.5   | Detected | 5621.4   | Detected   | Cklf          | 1.444829979 | 0.80383993 | 1.03692909 | 0.5769018 |
| A_52_P1598 | 5168.4  | Detected   | 7803.5  | Detected   | 5573.6   | Detected | 7467.4   | Detected   | Ddx49         | 1.444818512 | 1.0783995  | 0.95692958 | 0.7142436 |
| A_55_P1988 | 25278.9 | Detected   | 35477.1 | Detected   | 21937.8  | Detected | 36520.9  | Detected   | Atp6v1g1      | 1.444718718 | 0.86783048 | 1.0294218  | 0.6183651 |
| A_51_P4530 | 6595.3  | Detected   | 7149.4  | Detected   | 7579.2   | Detected | 9528.2   | Detected   | Coa6          | 1.444695465 | 1.14918199 | 1.33272722 | 1.0601169 |
| A_55_P1972 | 7324.1  | Detected   | 6759.2  | Detected   | 10629.9  | Detected | 10580.4  | Detected   | Tada3         | 1.444600702 | 1.45135921 | 1.56533318 | 1.5726565 |
| A_55_P1975 | 540.5   | Detected   | 643.8   | Detected   | 742.1    | Detected | 780.8    | Detected   | Bid1          | 1.444588344 | 1.37298797 | 1.21279901 | 1.1526872 |
| A_55_P2109 | 7.2     | Not Detect | 11.4    | Not Detect | 25.1     | Detected | 10.4     | Not Detect | Gm9951        | 1.444444444 | 3.48611111 | 0.9122807  | 2.2017544 |
| A_65_P1962 | 21345.1 | Detected   | 25114   | Detected   | 20998    | Detected | 30830.4  | Detected   | Ssu72         | 1.444378335 | 0.98373866 | 1.22761806 | 0.8361074 |
| A_55_P2107 | 380.6   | Detected   | 369.2   | Detected   | 335.4    | Detected | 549.7    | Detected   | Flad1         | 1.444298476 | 0.88124015 | 1.48889491 | 0.9084507 |
| A_51_P3032 | 13308.2 | Detected   | 16522.4 | Detected   | 17846.7  | Detected | 19220.7  | Detected   | Tmed10        | 1.444274958 | 1.34103034 | 1.16331163 | 1.0801518 |
| A_55_P1954 | 62.8    | Detected   | 62.7    | Detected   | 63.3     | Detected | 90.7     | Detected   | Lekr1         | 1.444267516 | 1.00796178 | 1.44657097 | 1.0095694 |
| A_51_P1188 | 5784.6  | Detected   | 11143.1 | Detected   | 6256.8   | Detected | 8352.9   | Detected   | Amacr         | 1.443989213 | 1.08163054 | 0.74960289 | 0.5614955 |
| A_55_P2247 | 62.4    | Detected   | 64.5    | Detected   | 67.5     | Detected | 90.1     | Detected   | BC028777      | 1.443910256 | 1.08173077 | 1.39689922 | 1.0465116 |
| A_55_P2156 | 2270.8  | Detected   | 2279.3  | Detected   | 2408.7   | Detected | 3278.5   | Detected   | Ppfia3        | 1.443764312 | 1.0607275  | 1.4383802  | 1.0567718 |
| A_66_P1296 | 46.2    | Detected   | 50.1    | Detected   | 40.3     | Detected | 66.7     | Detected   | Gm6567        | 1.443722944 | 0.87229437 | 1.33133733 | 0.8043912 |
| A_55_P1992 | 5925    | Detected   | 9026.6  | Detected   | 7719.8   | Detected | 8552.9   | Detected   | Entpd4        | 1.443527426 | 1.30291983 | 0.94752177 | 0.8552279 |
| A_51_P4079 | 31556.2 | Detected   | 31114.1 | Detected   | 35767.5  | Detected | 45549.2  | Detected   | Trappc4       | 1.443431085 | 1.13345396 | 1.46394079 | 1.1495592 |
| A_52_P3866 | 747.9   | Detected   | 663.8   | Detected   | 704.5    | Detected | 1079.5   | Detected   | Irak3         | 1.443374783 | 0.94197085 | 1.62624284 | 1.0613136 |
| A_55_P2081 | 4328.1  | Detected   | 3381.8  | Detected   | 4350.5   | Detected | 6246.6   | Detected   | Gpa33         | 1.443266098 | 1.00517548 | 1.84712283 | 1.2864451 |
| A_52_P9655 | 722.6   | Detected   | 819.3   | Detected   | 664.6    | Detected | 1042.9   | Detected   | Ssr1          | 1.443260448 | 0.91973429 | 1.2729159  | 0.8111803 |
| A_55_P2061 | 2314.5  | Detected   | 2609.7  | Detected   | 2786.2   | Detected | 3339.9   | Detected   | Snapin        | 1.443033052 | 1.20380212 | 1.27980228 | 1.0676323 |

|            |          |            |          |          |         |            |         |            |               |             |            |            |           |
|------------|----------|------------|----------|----------|---------|------------|---------|------------|---------------|-------------|------------|------------|-----------|
| A_55_P1974 | 1968.7   | Detected   | 2615.4   | Detected | 2124.7  | Detected   | 2840.5  | Detected   | Lysmd1        | 1.442830294 | 1.07924011 | 1.08606714 | 0.8123805 |
| A_55_P1952 | 450.2    | Detected   | 373.4    | Detected | 348.2   | Detected   | 649.5   | Detected   | Kctd2         | 1.442692137 | 0.77343403 | 1.73942153 | 0.9325121 |
| A_55_P1989 | 2666.7   | Detected   | 3666.4   | Detected | 2438.2  | Detected   | 3846.4  | Detected   | Tmem175       | 1.44238197  | 0.91431357 | 1.04909448 | 0.665012  |
| A_55_P2100 | 1960.1   | Detected   | 1778.1   | Detected | 1655.2  | Detected   | 2827.1  | Detected   | Gm4425        | 1.442324371 | 0.84444671 | 1.58995557 | 0.9308813 |
| A_55_P2047 | 53.6     | Detected   | 59.3     | Detected | 55.2    | Detected   | 77.3    | Detected   | Ypel3         | 1.442164179 | 1.02985075 | 1.30354132 | 0.93086   |
| A_55_P1959 | 64.7     | Detected   | 61.1     | Detected | 51.9    | Detected   | 93.3    | Detected   | Clec2e        | 1.442040185 | 0.80216383 | 1.52700491 | 0.8494272 |
| A_52_P6658 | 339.5    | Detected   | 405.5    | Detected | 282.2   | Detected   | 489.5   | Detected   | Abhd13        | 1.441826215 | 0.83122239 | 1.20715166 | 0.6959309 |
| A_52_P4854 | 3303.3   | Detected   | 4731.8   | Detected | 5154.3  | Detected   | 4762.7  | Detected   | Vta1          | 1.441800624 | 1.56034874 | 1.00653028 | 1.0892895 |
| A_55_P2141 | 31281    | Detected   | 41370.6  | Detected | 31668.7 | Detected   | 45089.2 | Detected   | Gabarapl2     | 1.441424507 | 1.01239411 | 1.08988509 | 0.7654881 |
| A_55_P2141 | 448.4    | Detected   | 398.9    | Detected | 483     | Detected   | 646.3   | Detected   | Mcu           | 1.441347012 | 1.07716325 | 1.62020557 | 1.2108298 |
| A_55_P2042 | 510.1    | Detected   | 690.6    | Detected | 211.1   | Detected   | 735.2   | Detected   | Pde5a         | 1.441286022 | 0.41384042 | 1.06458152 | 0.3056762 |
| A_52_P4107 | 798.9    | Detected   | 961.6    | Detected | 702.6   | Detected   | 1151.4  | Detected   | Cnot7         | 1.441231694 | 0.87945926 | 1.19737937 | 0.7306572 |
| A_55_P1977 | 234.8    | Detected   | 302.1    | Detected | 207.2   | Detected   | 338.4   | Detected   | Ptprn2        | 1.441226576 | 0.88245315 | 1.12015889 | 0.6858656 |
| A_51_P5118 | 1255.3   | Detected   | 2256.6   | Detected | 911.8   | Detected   | 1808.9  | Detected   | Mthfsd        | 1.441010117 | 0.72636023 | 0.80160418 | 0.4040592 |
| A_55_P2126 | 331.3    | Detected   | 301.1    | Detected | 282.5   | Detected   | 477.4   | Detected   | Nsf           | 1.440990039 | 0.85270148 | 1.58551976 | 0.9382265 |
| A_51_P1928 | 1668.5   | Detected   | 1767.8   | Detected | 1474.8  | Detected   | 2403.9  | Detected   | Ghdc          | 1.440755169 | 0.8839077  | 1.35982577 | 0.8342573 |
| A_55_P1990 | 3756.2   | Detected   | 4278.8   | Detected | 4165    | Detected   | 5411.3  | Detected   | Ndufaf4       | 1.440631489 | 1.1088334  | 1.26467701 | 0.9734038 |
| A_55_P2146 | 34.5     | Detected   | 30.6     | Detected | 191.1   | Detected   | 49.7    | Detected   | Olfcr681      | 1.44057971  | 5.53913043 | 1.62418301 | 6.245098  |
| A_55_P2032 | 29878.9  | Detected   | 35949.6  | Detected | 36704   | Detected   | 43041.4 | Detected   | Cisd1         | 1.440528266 | 1.22842541 | 1.19727062 | 1.0209849 |
| A_52_P4765 | 11864.2  | Detected   | 6092.3   | Detected | 16957.5 | Detected   | 17089.2 | Detected   | Tpcn1         | 1.440400533 | 1.42929991 | 2.805049   | 2.7834315 |
| A_55_P2101 | 4164     | Detected   | 4088.6   | Detected | 3827.1  | Detected   | 5996.7  | Detected   | Vamp5         | 1.440129683 | 0.91909222 | 1.46668786 | 0.9360417 |
| A_55_P2098 | 32.5     | Detected   | 27.3     | Detected | 29.3    | Detected   | 46.8    | Detected   | Slc12a7       | 1.44        | 0.90153846 | 1.71428571 | 1.0732601 |
| A_51_P3591 | 419.8    | Detected   | 407.2    | Detected | 741.9   | Detected   | 604.5   | Detected   | Doc2g         | 1.439971415 | 1.76727013 | 1.48452849 | 1.8219548 |
| A_55_P1999 | 6514.6   | Detected   | 5923.8   | Detected | 6509.8  | Detected   | 9380.3  | Detected   | Inpp5b        | 1.439888865 | 0.99926319 | 1.5834937  | 1.098923  |
| A_55_P2039 | 148073.6 | Detected   | 194246.3 | Detected | 77941   | Detected   | 213203  | Detected   | Hspb1         | 1.43984478  | 0.52636662 | 1.09759105 | 0.4012483 |
| A_52_P5063 | 1543.5   | Detected   | 1434.4   | Detected | 1730.2  | Detected   | 2222.2  | Detected   | B3gat3        | 1.439714934 | 1.12095886 | 1.54921919 | 1.2062186 |
| A_55_P1956 | 3246.9   | Detected   | 5529.9   | Detected | 2435.2  | Detected   | 4674.6  | Detected   | Rab3a         | 1.439711725 | 0.7500077  | 0.84533174 | 0.4403696 |
| A_55_P2142 | 1314.6   | Detected   | 908      | Detected | 1286    | Detected   | 1892.5  | Detected   | Mapk1ip1      | 1.4396014   | 0.97824433 | 2.0842511  | 1.4162996 |
| A_55_P2080 | 27.3     | Detected   | 25.4     | Detected | 25.9    | Detected   | 39.3    | Not Detect | 6430710C18Rik | 1.43956044  | 0.94871795 | 1.54724409 | 1.019685  |
| A_51_P2417 | 6.6      | Not Detect | 100.1    | Detected | 7.2     | Not Detect | 9.5     | Not Detect | Rhd           | 1.439393939 | 1.09090909 | 0.09490509 | 0.0719281 |
| A_55_P2213 | 54.4     | Detected   | 70.1     | Detected | 41.3    | Detected   | 78.3    | Detected   | D7ErtD183e    | 1.439338235 | 0.75919118 | 1.11697575 | 0.5891583 |
| A_55_P2412 | 177.8    | Detected   | 167.6    | Detected | 175     | Detected   | 255.9   | Detected   | 4930581F22Rik | 1.439257593 | 0.98425197 | 1.52684964 | 1.0441527 |
| A_55_P2051 | 13874.2  | Detected   | 12519.2  | Detected | 11949.8 | Detected   | 19966.2 | Detected   | Snap25        | 1.43908838  | 0.86129651 | 1.59484632 | 0.9545179 |
| A_55_P2154 | 8216.8   | Detected   | 10944.3  | Detected | 8461.6  | Detected   | 11821.8 | Detected   | Ap1g1         | 1.438735274 | 1.02979262 | 1.08017872 | 0.7731513 |
| A_55_P2175 | 10567.2  | Detected   | 12795.6  | Detected | 9750.3  | Detected   | 15201.7 | Detected   | Tusc3         | 1.438574078 | 0.92269475 | 1.1880412  | 0.7620041 |
| A_52_P5102 | 513.6    | Detected   | 738.1    | Detected | 472.5   | Detected   | 738.6   | Detected   | 9930014A18Rik | 1.438084112 | 0.91997664 | 1.00067741 | 0.6401572 |
| A_55_P2125 | 931.6    | Detected   | 920.6    | Detected | 821     | Detected   | 1339.6  | Detected   | Mterf1b       | 1.437956204 | 0.88127952 | 1.45513795 | 0.8918097 |
| A_52_P6441 | 221.5    | Detected   | 234.8    | Detected | 199.7   | Detected   | 318.5   | Detected   | Ccdc18        | 1.437923251 | 0.90158014 | 1.35647359 | 0.8505111 |
| A_55_P2247 | 45.9     | Detected   | 26.9     | Detected | 53.6    | Detected   | 66      | Detected   | 4930414L22Rik | 1.437908497 | 1.16775599 | 2.4535316  | 1.9925651 |
| A_55_P2075 | 182.7    | Detected   | 154.8    | Detected | 223     | Detected   | 262.7   | Detected   | Senp8         | 1.4378763   | 1.22058019 | 1.69702842 | 1.4405685 |

|            |                  |                  |                  |                  |               |             |            |            |           |
|------------|------------------|------------------|------------------|------------------|---------------|-------------|------------|------------|-----------|
| A_55_P1975 | 16.9 Detected    | 33 Detected      | 22 Detected      | 24.3 Not Detect  | Npas4         | 1.437869822 | 1.30177515 | 0.73636364 | 0.6666667 |
| A_51_P5096 | 36032 Detected   | 17896.5 Detected | 53944.8 Detected | 51806.2 Detected | Uap1l1        | 1.437783082 | 1.49713588 | 2.89476713 | 3.0142654 |
| A_51_P4647 | 49.8 Detected    | 45.5 Detected    | 42.4 Detected    | 71.6 Detected    | Adap2         | 1.437751004 | 0.85140562 | 1.57362637 | 0.9318681 |
| A_55_P2231 | 61.7 Detected    | 83.4 Detected    | 63.6 Detected    | 88.7 Detected    | Lhx1          | 1.437601297 | 1.03079417 | 1.06354916 | 0.7625899 |
| A_51_P3338 | 17.6 Detected    | 13 Not Detect    | 32.1 Detected    | 25.3 Not Detect  | Olfr1393      | 1.4375      | 1.82386364 | 1.94615385 | 2.4692308 |
| A_55_P1955 | 6.4 Not Detect   | 25.7 Detected    | 15.3 Not Detect  | 9.2 Not Detect   | Gm11757       | 1.4375      | 2.390625   | 0.35797665 | 0.5953307 |
| A_55_P2114 | 50.3 Detected    | 48 Detected      | 46.8 Detected    | 72.3 Detected    | Mospd4        | 1.437375746 | 0.9304175  | 1.50625    | 0.975     |
| A_55_P1967 | 28522.9 Detected | 37967.6 Detected | 32834.3 Detected | 40997.5 Detected | Chtf8         | 1.437353846 | 1.15115574 | 1.07980225 | 0.8647979 |
| A_55_P2108 | 9962.9 Detected  | 13560.6 Detected | 14226.4 Detected | 14319.4 Detected | Lgmn          | 1.43727228  | 1.42793765 | 1.05595623 | 1.0490981 |
| A_51_P2654 | 15505.1 Detected | 13712.4 Detected | 18766.7 Detected | 22284.7 Detected | Ric8          | 1.437249679 | 1.21035659 | 1.6251495  | 1.3685934 |
| A_55_P2076 | 30744.9 Detected | 58093.8 Detected | 16929.8 Detected | 44183.7 Detected | Anxa6         | 1.437106642 | 0.55065393 | 0.76055793 | 0.2914218 |
| A_55_P2236 | 39.6 Detected    | 36.8 Detected    | 36.1 Detected    | 56.9 Detected    | 6430590A07Rik | 1.436868687 | 0.91161616 | 1.54619565 | 0.9809783 |
| A_55_P2018 | 105.1 Detected   | 166.5 Detected   | 104.5 Detected   | 151 Detected     | 9530077C05Rik | 1.436726927 | 0.99429115 | 0.90690691 | 0.6276276 |
| A_52_P5107 | 7112.1 Detected  | 5543.6 Detected  | 15199.1 Detected | 10218 Detected   | Ctsh          | 1.436706458 | 2.13707625 | 1.84320658 | 2.7417382 |
| A_55_P2124 | 134.9 Detected   | 168.9 Detected   | 155.8 Detected   | 193.8 Detected   | Cep41         | 1.436619718 | 1.15492958 | 1.14742451 | 0.9224393 |
| A_66_P1396 | 7.1 Not Detect   | 6.3 Not Detect   | 25 Detected      | 10.2 Not Detect  | Slc25a53      | 1.436619718 | 3.52112676 | 1.61904762 | 3.968254  |
| A_51_P1836 | 2953.8 Detected  | 2169.6 Detected  | 1918.1 Detected  | 4243.2 Detected  | Bcor          | 1.436522446 | 0.64936692 | 1.95575221 | 0.88408   |
| A_66_P1039 | 867.1 Detected   | 1160.9 Detected  | 817.6 Detected   | 1245.6 Detected  | Rsrc1         | 1.436512513 | 0.94291316 | 1.07296063 | 0.7042812 |
| A_55_P1983 | 7959.1 Detected  | 10628.5 Detected | 10163.4 Detected | 11433.3 Detected | Abhd14a       | 1.43650664  | 1.27695342 | 1.07572094 | 0.9562403 |
| A_51_P1814 | 295.1 Detected   | 415.7 Detected   | 386 Detected     | 423.9 Detected   | Efcab2        | 1.436462216 | 1.30803118 | 1.01972576 | 0.9285542 |
| A_51_P5045 | 6638.5 Detected  | 8137 Detected    | 6951.1 Detected  | 9534.7 Detected  | Tm2d2         | 1.436273255 | 1.04708895 | 1.17177092 | 0.8542583 |
| A_51_P1240 | 1339.3 Detected  | 1040.7 Detected  | 1351.7 Detected  | 1923.6 Detected  | Gtpbp2        | 1.43627268  | 1.00925857 | 1.84837129 | 1.2988373 |
| A_51_P2542 | 7625.4 Detected  | 10417 Detected   | 10932 Detected   | 10951.7 Detected | Chchd4        | 1.436213182 | 1.43362971 | 1.05132956 | 1.0494384 |
| A_55_P2062 | 135.5 Detected   | 137.7 Detected   | 141 Detected     | 194.6 Detected   | Spg21         | 1.436162362 | 1.04059041 | 1.41321714 | 1.0239651 |
| A_52_P5143 | 920.7 Detected   | 949.1 Detected   | 1211.4 Detected  | 1322.2 Detected  | Slc35a3       | 1.436081243 | 1.31573803 | 1.39310926 | 1.2763671 |
| A_55_P2103 | 22209.3 Detected | 24257.8 Detected | 27082.9 Detected | 31893.8 Detected | Ndufa5        | 1.436056067 | 1.2194396  | 1.31478535 | 1.1164615 |
| A_55_P2277 | 123.4 Detected   | 153.2 Detected   | 153.9 Detected   | 177.2 Detected   | Nudt5         | 1.435980551 | 1.2471637  | 1.15665796 | 1.0045692 |
| A_55_P2233 | 500.3 Detected   | 340.2 Detected   | 249.8 Detected   | 718.4 Detected   | D930023I05Rik | 1.435938437 | 0.49930042 | 2.111699   | 0.734274  |
| A_52_P4713 | 10618.5 Detected | 4979.9 Detected  | 13678.1 Detected | 15247.4 Detected | Ifngr2        | 1.435927862 | 1.28813863 | 3.06178839 | 2.7466616 |
| A_52_P6634 | 10162.2 Detected | 13574.7 Detected | 10085.3 Detected | 14591.8 Detected | P4ha2         | 1.435889866 | 0.99243274 | 1.07492615 | 0.7429483 |
| A_51_P1232 | 432.5 Detected   | 584.9 Detected   | 559.2 Detected   | 621 Detected     | Ppp1r7        | 1.43583815  | 1.29294798 | 1.06171995 | 0.9560609 |
| A_55_P2145 | 10715.4 Detected | 11007.7 Detected | 16469.2 Detected | 15383.7 Detected | Slmap         | 1.435662691 | 1.53696549 | 1.3975399  | 1.4961527 |
| A_52_P3092 | 129.7 Detected   | 125.3 Detected   | 146.1 Detected   | 186.2 Detected   | Srr           | 1.435620663 | 1.12644564 | 1.48603352 | 1.1660016 |
| A_51_P2457 | 16361.7 Detected | 15987.1 Detected | 13655.6 Detected | 23488.6 Detected | Pcolce2       | 1.435584322 | 0.83460765 | 1.46922206 | 0.8541637 |
| A_51_P3027 | 6.2 Not Detect   | 17.1 Detected    | 16.9 Detected    | 8.9 Not Detect   | Upp1          | 1.435483871 | 2.72580645 | 0.52046784 | 0.9883041 |
| A_55_P1953 | 1205.6 Detected  | 1275.1 Detected  | 1348.5 Detected  | 1730.3 Detected  | Rab13         | 1.435218978 | 1.11853019 | 1.35699161 | 1.0575641 |
| A_55_P1990 | 2906 Detected    | 3319.7 Detected  | 3841 Detected    | 4170.4 Detected  | Recql         | 1.435099794 | 1.32174811 | 1.2562581  | 1.1570323 |
| A_55_P2023 | 13278.5 Detected | 10609.4 Detected | 15989.6 Detected | 19055.9 Detected | 9030624J02Rik | 1.435094325 | 1.20417216 | 1.79613362 | 1.5071163 |
| A_52_P1226 | 4278.1 Detected  | 4552.4 Detected  | 7273.4 Detected  | 6138.7 Detected  | Arl2          | 1.434912695 | 1.70014726 | 1.34845356 | 1.5977067 |
| A_51_P3209 | 144.9 Detected   | 177.9 Detected   | 277.1 Detected   | 207.9 Detected   | Sfxn4         | 1.434782609 | 1.91235335 | 1.16863406 | 1.5576166 |

|            |                  |                  |                  |                  |               |             |            |            |           |
|------------|------------------|------------------|------------------|------------------|---------------|-------------|------------|------------|-----------|
| A_55_P2021 | 428.3 Detected   | 473.3 Detected   | 344.2 Detected   | 614.5 Detected   | C87414        | 1.434742003 | 0.80364231 | 1.29833087 | 0.7272343 |
| A_55_P2058 | 3003.9 Detected  | 2929.5 Detected  | 3137.7 Detected  | 4309.3 Detected  | Tmc8          | 1.434568394 | 1.0445421  | 1.47100188 | 1.0710701 |
| A_51_P5077 | 1359.4 Detected  | 1357.3 Detected  | 1696.3 Detected  | 1950.1 Detected  | Sergef        | 1.43452994  | 1.24782992 | 1.43674943 | 1.2497606 |
| A_51_P3131 | 12095.2 Detected | 15821.2 Detected | 13241.4 Detected | 17350.8 Detected | Arhgef5       | 1.434519479 | 1.09476487 | 1.0966804  | 0.8369403 |
| A_66_P1199 | 403.5 Detected   | 413.2 Detected   | 382.1 Detected   | 578.8 Detected   | Zcchc4        | 1.434448575 | 0.94696406 | 1.40077444 | 0.9247338 |
| A_51_P3568 | 56.4 Detected    | 39.9 Detected    | 47.4 Detected    | 80.9 Detected    | Vps13c        | 1.434397163 | 0.84042553 | 2.02756892 | 1.1879699 |
| A_55_P1976 | 10933.7 Detected | 13124.9 Detected | 8970.2 Detected  | 15681.6 Detected | Arhgef7       | 1.434244583 | 0.82041761 | 1.19479767 | 0.683449  |
| A_51_P2639 | 8442.5 Detected  | 11319.8 Detected | 5735.3 Detected  | 12108.3 Detected | Hmox1         | 1.434207877 | 0.67933669 | 1.06965671 | 0.5066609 |
| A_52_P4447 | 468.4 Detected   | 470.8 Detected   | 354.3 Detected   | 671.7 Detected   | N4bp2l2       | 1.434030743 | 0.75640478 | 1.42672048 | 0.7525489 |
| A_55_P1990 | 1285.9 Detected  | 1567.7 Detected  | 1207 Detected    | 1844 Detected    | Banp          | 1.434015087 | 0.9386422  | 1.17624546 | 0.7699177 |
| A_55_P2023 | 39.4 Detected    | 51.3 Detected    | 46.7 Detected    | 56.5 Detected    | Pcdha9        | 1.434010152 | 1.18527919 | 1.10136452 | 0.9103314 |
| A_55_P2031 | 1785.3 Detected  | 1815.2 Detected  | 1470.8 Detected  | 2560 Detected    | Sun1          | 1.433932672 | 0.82383913 | 1.41031291 | 0.8102688 |
| A_55_P2126 | 220.1 Detected   | 204 Detected     | 316.5 Detected   | 315.6 Detected   | Fam219b       | 1.433893685 | 1.43798274 | 1.54705882 | 1.5514706 |
| A_55_P2064 | 16.6 Detected    | 14.3 Not Detect  | 6.8 Not Detect   | 23.8 Not Detect  | Npbwr1        | 1.43373494  | 0.40963855 | 1.66433566 | 0.4755245 |
| A_55_P2023 | 3193.7 Detected  | 4996.8 Detected  | 3250.6 Detected  | 4578.9 Detected  | Dnaja2        | 1.433728904 | 1.01781633 | 0.91636647 | 0.6505363 |
| A_51_P2774 | 3659.8 Detected  | 8607.1 Detected  | 3982.2 Detected  | 5246.8 Detected  | Rnf19a        | 1.433630253 | 1.08809225 | 0.60958976 | 0.4626645 |
| A_51_P2025 | 11.3 Not Detect  | 14 Not Detect    | 23.4 Detected    | 16.2 Not Detect  | Sh3tc2        | 1.433628319 | 2.07079646 | 1.15714286 | 1.6714286 |
| A_55_P2102 | 10985.4 Detected | 15180.8 Detected | 10327 Detected   | 15747.2 Detected | Tmem184c      | 1.433466237 | 0.94006591 | 1.03731029 | 0.6802672 |
| A_51_P5132 | 47862.8 Detected | 52071.5 Detected | 40591.7 Detected | 68604.7 Detected | Rac1          | 1.433361609 | 0.84808452 | 1.31750958 | 0.7795378 |
| A_55_P2182 | 30.7 Detected    | 67.4 Detected    | 49.9 Detected    | 44 Not Detect    | 1700008O03Rik | 1.433224756 | 1.62540717 | 0.65281899 | 0.7403561 |
| A_55_P2143 | 348.6 Detected   | 224.8 Detected   | 482.9 Detected   | 499.6 Detected   | Gm996         | 1.433161216 | 1.38525531 | 2.22241993 | 2.1481317 |
| A_55_P2145 | 68.8 Detected    | 76.8 Detected    | 70.5 Detected    | 98.6 Detected    | Myh9          | 1.433139535 | 1.0247093  | 1.28385417 | 0.9179688 |
| A_52_P5978 | 921.2 Detected   | 761.1 Detected   | 932.3 Detected   | 1320 Detected    | Wasf2         | 1.432913591 | 1.0120495  | 1.73433189 | 1.2249376 |
| A_55_P1969 | 40523.3 Detected | 56629.1 Detected | 46438.6 Detected | 58065.6 Detected | Tcf25         | 1.432894162 | 1.14597281 | 1.02536682 | 0.8200483 |
| A_55_P2003 | 27129 Detected   | 34732.5 Detected | 25568 Detected   | 38872.5 Detected | Fkbp8         | 1.432876258 | 0.9424601  | 1.11919672 | 0.7361405 |
| A_55_P2001 | 13.4 Not Detect  | 45.9 Detected    | 17.2 Not Detect  | 19.2 Not Detect  | Pde6c         | 1.432835821 | 1.28358209 | 0.41830065 | 0.3747277 |
| A_55_P2064 | 369.6 Detected   | 487 Detected     | 622.9 Detected   | 529.5 Detected   | Nmb           | 1.43262987  | 1.6853355  | 1.08726899 | 1.2790554 |
| A_51_P2255 | 86668.6 Detected | 98145.1 Detected | 69955.4 Detected | 124159 Detected  | Tpm4          | 1.432571889 | 0.80715969 | 1.26505551 | 0.7127753 |
| A_55_P2184 | 203 Detected     | 294.1 Detected   | 225.7 Detected   | 290.8 Detected   | Nfatc3        | 1.432512315 | 1.11182266 | 0.98877933 | 0.767426  |
| A_55_P2155 | 1600 Detected    | 1656.9 Detected  | 2029.4 Detected  | 2291.9 Detected  | Snhg10        | 1.4324375   | 1.268375   | 1.38324582 | 1.2248174 |
| A_51_P4838 | 33.3 Detected    | 29 Detected      | 23.2 Detected    | 47.7 Detected    | Crygd         | 1.432432432 | 0.6966967  | 1.64482759 | 0.8       |
| A_55_P2329 | 562.5 Detected   | 781.7 Detected   | 763.4 Detected   | 805.7 Detected   | Dyrk2         | 1.432355556 | 1.35715556 | 1.03070232 | 0.9765895 |
| A_51_P4090 | 22723.4 Detected | 25074.5 Detected | 29719.9 Detected | 32546.9 Detected | Echs1         | 1.432307665 | 1.30789847 | 1.29800794 | 1.1852639 |
| A_51_P3937 | 1068.9 Detected  | 1117.6 Detected  | 1640.6 Detected  | 1530.8 Detected  | Osbp          | 1.432126485 | 1.53484891 | 1.36972083 | 1.4679671 |
| A_55_P2377 | 100.7 Detected   | 82.4 Detected    | 161.1 Detected   | 144.2 Detected   | 2310068J16Rik | 1.431976167 | 1.59980139 | 1.75       | 1.9550971 |
| A_55_P2035 | 12085.6 Detected | 12444.1 Detected | 20389.7 Detected | 17304.7 Detected | Nt5c3         | 1.431844509 | 1.68710697 | 1.39059474 | 1.6385034 |
| A_55_P2034 | 39.6 Detected    | 82.2 Detected    | 52.4 Detected    | 56.7 Detected    | Cage1         | 1.431818182 | 1.32323232 | 0.68978102 | 0.6374696 |
| A_52_P2593 | 2948.7 Detected  | 2841.1 Detected  | 3053 Detected    | 4221.8 Detected  | Fkbp15        | 1.431749585 | 1.03537152 | 1.48597374 | 1.0745838 |
| A_55_P1974 | 9.5 Not Detect   | 28.4 Detected    | 3.7 Not Detect   | 13.6 Not Detect  | Tnr           | 1.431578947 | 0.38947368 | 0.47887324 | 0.1302817 |
| A_55_P2256 | 24.1 Detected    | 25 Detected      | 22.7 Detected    | 34.5 Not Detect  | C230030N03Rik | 1.43153527  | 0.94190871 | 1.38       | 0.908     |

|            |                  |                  |                  |                  |               |             |            |            |           |
|------------|------------------|------------------|------------------|------------------|---------------|-------------|------------|------------|-----------|
| A_55_P2135 | 542.2 Detected   | 573.7 Detected   | 921.6 Detected   | 776.1 Detected   | Hist1h4m      | 1.431390631 | 1.69974179 | 1.35279763 | 1.6064145 |
| A_55_P2010 | 583 Detected     | 609.1 Detected   | 458 Detected     | 834.5 Detected   | Zfp113        | 1.431389365 | 0.78559177 | 1.37005418 | 0.7519291 |
| A_51_P4593 | 1822.6 Detected  | 1739.6 Detected  | 1769.8 Detected  | 2608.7 Detected  | Pacrgl        | 1.431306924 | 0.9710304  | 1.49959761 | 1.0173603 |
| A_66_P1170 | 13289.6 Detected | 15154.1 Detected | 17387.6 Detected | 19020.3 Detected | Atp6v1e1      | 1.431216891 | 1.30836143 | 1.25512568 | 1.1473859 |
| A_51_P4527 | 4545.1 Detected  | 4172.3 Detected  | 5671.8 Detected  | 6504.4 Detected  | Zfp524        | 1.431079624 | 1.24789334 | 1.5589483  | 1.3593941 |
| A_52_P1717 | 2452.3 Detected  | 2569 Detected    | 2379 Detected    | 3509.4 Detected  | Smg1          | 1.431064715 | 0.97010969 | 1.36605683 | 0.9260413 |
| A_52_P8266 | 350.6 Detected   | 430.2 Detected   | 415.4 Detected   | 501.7 Detected   | Mcm9          | 1.430975471 | 1.18482601 | 1.16620177 | 0.9655974 |
| A_55_P2044 | 24805.1 Detected | 23433.7 Detected | 36388.8 Detected | 35492.7 Detected | Fam96a        | 1.430863008 | 1.46698864 | 1.51460077 | 1.5528406 |
| A_55_P2075 | 64.3 Detected    | 77.3 Detected    | 74.8 Detected    | 92 Detected      | Rab11fip4     | 1.430793157 | 1.16329705 | 1.19016818 | 0.9676585 |
| A_51_P4152 | 20.2 Detected    | 16.7 Not Detect  | 8 Not Detect     | 28.9 Not Detect  | Zfp105        | 1.430693069 | 0.3960396  | 1.73053892 | 0.4790419 |
| A_55_P1982 | 13.7 Not Detect  | 31.7 Detected    | 15.6 Not Detect  | 19.6 Not Detect  | Phactr2       | 1.430656934 | 1.13868613 | 0.61829653 | 0.4921136 |
| A_55_P2000 | 7587.1 Detected  | 6388.8 Detected  | 7692.4 Detected  | 10854.3 Detected | Pcnx13        | 1.430625667 | 1.01387882 | 1.69895755 | 1.2040446 |
| A_55_P1992 | 98 Detected      | 101.8 Detected   | 82.6 Detected    | 140.2 Detected   | Olf1115       | 1.430612245 | 0.84285714 | 1.37721022 | 0.8113949 |
| A_51_P4569 | 617.4 Detected   | 639.2 Detected   | 645.1 Detected   | 883.2 Detected   | B630005N14Rik | 1.430515063 | 1.04486557 | 1.38172716 | 1.0092303 |
| A_51_P4914 | 6928.2 Detected  | 11733.2 Detected | 10027.5 Detected | 9910.8 Detected  | Ddx47         | 1.430501429 | 1.44734563 | 0.84468005 | 0.8546262 |
| A_55_P1986 | 7.9 Not Detect   | 21.6 Detected    | 8.6 Not Detect   | 11.3 Not Detect  | Tcp11         | 1.430379747 | 1.08860759 | 0.52314815 | 0.3981481 |
| A_52_P3606 | 1432.9 Detected  | 1392.8 Detected  | 1766.9 Detected  | 2049.1 Detected  | Abcb7         | 1.430036988 | 1.23309373 | 1.47120908 | 1.2685956 |
| A_55_P2462 | 13231.5 Detected | 13593.3 Detected | 16908.7 Detected | 18916.8 Detected | Nsf           | 1.429679175 | 1.27791256 | 1.39162676 | 1.2438996 |
| A_55_P1967 | 16231.1 Detected | 20275.1 Detected | 19076.6 Detected | 23204.9 Detected | Stra13        | 1.429656647 | 1.17531159 | 1.14450237 | 0.9408881 |
| A_55_P1970 | 2406 Detected    | 2632.3 Detected  | 2353.3 Detected  | 3439.3 Detected  | Per1          | 1.429467997 | 0.97809643 | 1.306576   | 0.894009  |
| A_51_P2376 | 15693.7 Detected | 16984.2 Detected | 18913.5 Detected | 22431.3 Detected | Gnai3         | 1.429318771 | 1.20516513 | 1.32071572 | 1.1135938 |
| A_55_P2124 | 3719 Detected    | 5114.2 Detected  | 4229.6 Detected  | 5315.6 Detected  | Lysmd1        | 1.429308954 | 1.13729497 | 1.03938055 | 0.8270306 |
| A_55_P2081 | 32.4 Detected    | 41.7 Detected    | 48.8 Detected    | 46.3 Not Detect  | Gnas          | 1.429012346 | 1.50617284 | 1.11031175 | 1.1702638 |
| A_55_P2182 | 365.3 Detected   | 519.8 Detected   | 446 Detected     | 521.9 Detected   | Adat1         | 1.428688749 | 1.22091432 | 1.00404002 | 0.8580223 |
| A_55_P2214 | 65.8 Detected    | 79.4 Detected    | 69.5 Detected    | 94 Detected      | 2810008D09Rik | 1.428571429 | 1.056231   | 1.18387909 | 0.8753149 |
| A_52_P5624 | 16.1 Detected    | 32.5 Detected    | 10.4 Not Detect  | 23 Not Detect    | Sync          | 1.428571429 | 0.64596273 | 0.70769231 | 0.32      |
| A_51_P2701 | 3057.8 Detected  | 2429.5 Detected  | 3508.5 Detected  | 4367.9 Detected  | Nhlrc2        | 1.428445287 | 1.14739355 | 1.79785964 | 1.4441243 |
| A_55_P2429 | 204 Detected     | 205.2 Detected   | 222.7 Detected   | 291.4 Detected   | Timmdc1       | 1.428431373 | 1.09166667 | 1.42007797 | 1.0852827 |
| A_55_P1960 | 341.5 Detected   | 325.5 Detected   | 386.6 Detected   | 487.8 Detected   | Vcan          | 1.4284041   | 1.13206442 | 1.49861751 | 1.1877112 |
| A_51_P3417 | 14010.9 Detected | 17478.7 Detected | 14645.2 Detected | 20008.7 Detected | Sugp1         | 1.428080994 | 1.0452719  | 1.14474761 | 0.8378884 |
| A_55_P2072 | 333.9 Detected   | 330.2 Detected   | 310.9 Detected   | 476.8 Detected   | 6720401G13Rik | 1.427972447 | 0.9311171  | 1.44397335 | 0.9415506 |
| A_51_P2691 | 2105.9 Detected  | 2505.5 Detected  | 2445.2 Detected  | 3007.1 Detected  | Alg9          | 1.427940548 | 1.16111876 | 1.20019956 | 0.9759329 |
| A_66_P1098 | 42989.5 Detected | 64701.1 Detected | 47785.2 Detected | 61382.2 Detected | Gcsh          | 1.427841682 | 1.11155515 | 0.94870412 | 0.7385531 |
| A_52_P5879 | 443.6 Detected   | 483.7 Detected   | 313 Detected     | 633.3 Detected   | Zfp11         | 1.427637511 | 0.70559062 | 1.30928261 | 0.6470953 |
| A_55_P2158 | 730.9 Detected   | 717.6 Detected   | 745.9 Detected   | 1043.3 Detected  | Nkiras2       | 1.427418251 | 1.02052264 | 1.45387402 | 1.039437  |
| A_52_P2970 | 3478.5 Detected  | 3301 Detected    | 2856.1 Detected  | 4964.5 Detected  | Heatr5a       | 1.42719563  | 0.8210723  | 1.5039382  | 0.8652227 |
| A_66_P1385 | 2580.1 Detected  | 2537.3 Detected  | 2149.7 Detected  | 3682.3 Detected  | Szt2          | 1.427192744 | 0.83318476 | 1.45126709 | 0.8472392 |
| A_55_P1961 | 98.6 Detected    | 122 Detected     | 138.9 Detected   | 140.7 Detected   | LOC101056590  | 1.426977688 | 1.40872211 | 1.15327869 | 1.1385246 |
| A_52_P2574 | 861.5 Detected   | 775.3 Detected   | 997.5 Detected   | 1229.2 Detected  | Eps8l2        | 1.426813697 | 1.15786419 | 1.58545079 | 1.2865987 |
| A_55_P2010 | 5883.6 Detected  | 6429.2 Detected  | 4144.1 Detected  | 8394.1 Detected  | Gm6252        | 1.426694541 | 0.70434768 | 1.30562123 | 0.6445748 |

|            |          |            |          |            |          |            |          |            |               |             |            |            |           |
|------------|----------|------------|----------|------------|----------|------------|----------|------------|---------------|-------------|------------|------------|-----------|
| A_51_P5056 | 1269.6   | Detected   | 1373.7   | Detected   | 1735     | Detected   | 1811.3   | Detected   | Inpp5k        | 1.426669817 | 1.36657215 | 1.31855573 | 1.2630123 |
| A_55_P2028 | 266.5    | Detected   | 335.7    | Detected   | 443.1    | Detected   | 380.2    | Detected   | 1810013A23Rik | 1.426641651 | 1.66266417 | 1.13255883 | 1.3199285 |
| A_55_P1954 | 16245.3  | Detected   | 18522.5  | Detected   | 32347    | Detected   | 23175.3  | Detected   | Esrra         | 1.42658492  | 1.99116052 | 1.25119719 | 1.7463625 |
| A_55_P2011 | 6.8      | Not Detect | 21       | Detected   | 10.8     | Not Detect | 9.7      | Not Detect | Gsdma2        | 1.426470588 | 1.58823529 | 0.46190476 | 0.5142857 |
| A_55_P2033 | 91.7     | Detected   | 122.7    | Detected   | 102.1    | Detected   | 130.8    | Detected   | Ltbp4         | 1.426390403 | 1.1134133  | 1.06601467 | 0.8321108 |
| A_52_P3819 | 3833.6   | Detected   | 3348.2   | Detected   | 2653.1   | Detected   | 5467.8   | Detected   | Ubqln2        | 1.426283389 | 0.6920649  | 1.63305657 | 0.7923959 |
| A_55_P2108 | 4625.9   | Detected   | 3343.2   | Detected   | 7292.5   | Detected   | 6597.7   | Detected   | Phkg2         | 1.426252189 | 1.57644999 | 1.97346853 | 2.1812934 |
| A_51_P2259 | 1742.5   | Detected   | 1176.4   | Detected   | 2067.9   | Detected   | 2484.8   | Detected   | Snx33         | 1.425997131 | 1.18674319 | 2.11220673 | 1.7578205 |
| A_52_P5707 | 1011     | Detected   | 783.9    | Detected   | 1227.1   | Detected   | 1441.6   | Detected   | Dpp8          | 1.425914936 | 1.21374876 | 1.83901008 | 1.5653782 |
| A_52_P1346 | 9703     | Detected   | 12022.4  | Detected   | 11800.3  | Detected   | 13835.6  | Detected   | Srpr          | 1.425909513 | 1.21614964 | 1.15081847 | 0.9815262 |
| A_51_P1832 | 9375.3   | Detected   | 9862.3   | Detected   | 11546.3  | Detected   | 13367.5  | Detected   | Sympk         | 1.42582104  | 1.23156592 | 1.35541405 | 1.1707512 |
| A_51_P2868 | 77.5     | Detected   | 66.1     | Detected   | 60.1     | Detected   | 110.5    | Detected   | 10-Mar        | 1.425806452 | 0.77548387 | 1.67170953 | 0.9092284 |
| A_55_P2011 | 139.9    | Detected   | 137.5    | Detected   | 191.7    | Detected   | 199.4    | Detected   | Scd4          | 1.425303788 | 1.37026447 | 1.45018182 | 1.3941818 |
| A_51_P3373 | 137.1    | Detected   | 161.9    | Detected   | 180.2    | Detected   | 195.4    | Detected   | Ern2          | 1.425237053 | 1.31436907 | 1.20691785 | 1.1130327 |
| A_66_P1141 | 123.7    | Detected   | 127.2    | Detected   | 237.4    | Detected   | 176.3    | Detected   | Hist2h2ab     | 1.425222312 | 1.91915926 | 1.38600629 | 1.8663522 |
| A_55_P1963 | 6029.4   | Detected   | 5410.8   | Detected   | 6037.6   | Detected   | 8593.2   | Detected   | Yae1d1        | 1.425216439 | 1.00136    | 1.58815702 | 1.1158424 |
| A_52_P1656 | 41.4     | Detected   | 35.1     | Detected   | 44.1     | Detected   | 59       | Detected   | Star          | 1.425120773 | 1.06521739 | 1.68091168 | 1.2564103 |
| A_52_P3494 | 1094.9   | Detected   | 1171.2   | Detected   | 1355     | Detected   | 1560.3   | Detected   | Tmlhe         | 1.425061649 | 1.23755594 | 1.33222336 | 1.1569331 |
| A_55_P2049 | 48.7     | Detected   | 51.2     | Detected   | 54.5     | Detected   | 69.4     | Detected   | Ly6h          | 1.425051335 | 1.11909651 | 1.35546875 | 1.0644531 |
| A_51_P1534 | 29679.3  | Detected   | 39753.9  | Detected   | 24722.2  | Detected   | 42288.9  | Detected   | Dnajb1        | 1.424861772 | 0.83297787 | 1.06376733 | 0.6218811 |
| A_55_P2034 | 3527.2   | Detected   | 4164.7   | Detected   | 6464.3   | Detected   | 5025.2   | Detected   | Fbxl12        | 1.424699478 | 1.83270016 | 1.20661752 | 1.5521646 |
| A_55_P2040 | 499      | Detected   | 253.1    | Detected   | 878.9    | Detected   | 710.9    | Detected   | Exd1          | 1.424649299 | 1.76132265 | 2.80877124 | 3.4725405 |
| A_55_P1952 | 13912.6  | Detected   | 11423.8  | Detected   | 11483.3  | Detected   | 19820.3  | Detected   | Kctd2         | 1.424629473 | 0.8253885  | 1.73500061 | 1.0052084 |
| A_52_P5320 | 2133     | Detected   | 2568.7   | Detected   | 2429.4   | Detected   | 3038.6   | Detected   | Tbk1          | 1.424566338 | 1.13895921 | 1.182933   | 0.9457702 |
| A_55_P2025 | 9213.1   | Detected   | 8795.4   | Detected   | 7929     | Detected   | 13122.9  | Detected   | Oprm1         | 1.424373989 | 0.86062237 | 1.49201856 | 0.901494  |
| A_52_P1620 | 6094.5   | Detected   | 7446.8   | Detected   | 6158.3   | Detected   | 8680.8   | Detected   | Ckap2         | 1.424366232 | 1.01046846 | 1.16570876 | 0.8269727 |
| A_55_P1993 | 6.6      | Not Detect | 22.1     | Detected   | 7.7      | Not Detect | 9.4      | Not Detect | Amelx         | 1.424242424 | 1.16666667 | 0.42533937 | 0.3484163 |
| A_55_P1974 | 75.9     | Detected   | 101.9    | Detected   | 90.7     | Detected   | 108.1    | Detected   | Hist2h4       | 1.424242424 | 1.19499341 | 1.06084396 | 0.8900883 |
| A_66_P1368 | 116      | Detected   | 109.9    | Detected   | 150.4    | Detected   | 165.2    | Detected   | 6030408B16Rik | 1.424137931 | 1.29655172 | 1.50318471 | 1.3685168 |
| A_55_P1970 | 370.7    | Detected   | 540.9    | Detected   | 387.9    | Detected   | 527.9    | Detected   | Mccc1         | 1.424062584 | 1.04639871 | 0.97596598 | 0.7171381 |
| A_51_P4338 | 116938.2 | Detected   | 155500.4 | Detected   | 157147.4 | Detected   | 166524.3 | Detected   | Tpi1          | 1.424036799 | 1.34385    | 1.07089307 | 1.0105916 |
| A_55_P2000 | 2354.3   | Detected   | 2091.6   | Detected   | 1060     | Detected   | 3352.5   | Detected   | Lonrf1        | 1.423990146 | 0.45023999 | 1.60283993 | 0.5067891 |
| A_51_P3258 | 258.5    | Detected   | 303.6    | Detected   | 227.6    | Detected   | 368.1    | Detected   | 1810033B17Rik | 1.423984526 | 0.88046422 | 1.21245059 | 0.7496706 |
| A_55_P2171 | 95.8     | Detected   | 79.3     | Detected   | 75.8     | Detected   | 136.4    | Detected   | Matn4         | 1.423799582 | 0.79123173 | 1.72005044 | 0.9558638 |
| A_66_P1238 | 47.9     | Detected   | 56.9     | Detected   | 61.9     | Detected   | 68.2     | Detected   | Olfr168       | 1.423799582 | 1.29227557 | 1.19859402 | 1.0878735 |
| A_55_P2005 | 5.9      | Not Detect | 4        | Not Detect | 69.2     | Detected   | 8.4      | Not Detect | Dcstamp       | 1.423728814 | 11.7288136 | 2.1        | 17.3      |
| A_51_P3376 | 519.6    | Detected   | 614.6    | Detected   | 52       | Detected   | 739.7    | Detected   | Ddx26b        | 1.423595073 | 0.10007698 | 1.20354702 | 0.0846079 |
| A_55_P2120 | 2415.9   | Detected   | 3205     | Detected   | 2847.7   | Detected   | 3439.1   | Detected   | Gas2l3        | 1.423527464 | 1.17873256 | 1.07304212 | 0.8885179 |
| A_55_P2039 | 307.9    | Detected   | 331.1    | Detected   | 353.8    | Detected   | 438.3    | Detected   | Dnajc14       | 1.423514128 | 1.14907437 | 1.32376925 | 1.0685593 |
| A_66_P1124 | 13726.2  | Detected   | 18336.1  | Detected   | 12770.7  | Detected   | 19539.4  | Detected   | Tmem184c      | 1.423511241 | 0.9303886  | 1.06562464 | 0.6964785 |



|            |          |          |          |            |          |            |          |            |               |             |            |            |           |
|------------|----------|----------|----------|------------|----------|------------|----------|------------|---------------|-------------|------------|------------|-----------|
| A_55_P2129 | 47.7     | Detected | 47.9     | Detected   | 44.3     | Detected   | 67.9     | Detected   | Gbe1          | 1.423480084 | 0.92872117 | 1.41753653 | 0.9248434 |
| A_55_P1975 | 33611.2  | Detected | 52718.2  | Detected   | 37001.1  | Detected   | 47844.5  | Detected   | FlnC          | 1.423468963 | 1.10085626 | 0.90755185 | 0.7018658 |
| A_55_P2001 | 27.4     | Detected | 27.3     | Detected   | 24.6     | Detected   | 39       | Not Detect | Igdcc4        | 1.423357664 | 0.89781022 | 1.42857143 | 0.9010989 |
| A_66_P1148 | 5471.5   | Detected | 5733.5   | Detected   | 4106.3   | Detected   | 7787.5   | Detected   | Ankrd11       | 1.423284291 | 0.7504889  | 1.3582454  | 0.7161943 |
| A_55_P2085 | 197.3    | Detected | 198.6    | Detected   | 347.5    | Detected   | 280.8    | Detected   | Gpam          | 1.423213381 | 1.76127724 | 1.41389728 | 1.7497482 |
| A_51_P2376 | 8460.4   | Detected | 8130.5   | Detected   | 9349.2   | Detected   | 12040    | Detected   | Smim14        | 1.423100563 | 1.10505413 | 1.48084374 | 1.1498924 |
| A_55_P2022 | 121720.7 | Detected | 114886.6 | Detected   | 158117.5 | Detected   | 173199.9 | Detected   | Gpi1          | 1.422928886 | 1.29901898 | 1.50757268 | 1.3762919 |
| A_51_P1493 | 12211    | Detected | 13981.3  | Detected   | 15779    | Detected   | 17372.8  | Detected   | Psmd8         | 1.422717222 | 1.29219556 | 1.24257401 | 1.1285789 |
| A_52_P6165 | 898.6    | Detected | 994.7    | Detected   | 912.7    | Detected   | 1278.3   | Detected   | Eri3          | 1.422546183 | 1.01569108 | 1.28511109 | 0.9175631 |
| A_51_P1614 | 257.5    | Detected | 303.2    | Detected   | 246.7    | Detected   | 366.3    | Detected   | Ccdc103       | 1.422524272 | 0.95805825 | 1.20811346 | 0.8136544 |
| A_55_P2215 | 415.4    | Detected | 429.9    | Detected   | 377.3    | Detected   | 590.9    | Detected   | Ephb2         | 1.422484352 | 0.90828117 | 1.3745057  | 0.877646  |
| A_55_P1991 | 26836.3  | Detected | 32165.4  | Detected   | 31968.5  | Detected   | 38170.8  | Detected   | Acadv1        | 1.422357031 | 1.19124097 | 1.18670373 | 0.9938785 |
| A_52_P3925 | 129.3    | Detected | 134.4    | Detected   | 211.1    | Detected   | 183.9    | Detected   | Gin1          | 1.422273782 | 1.63263728 | 1.36830357 | 1.5706845 |
| A_52_P1228 | 682.9    | Detected | 740      | Detected   | 803.4    | Detected   | 971.2    | Detected   | Gltscr11      | 1.422170157 | 1.17645336 | 1.31243243 | 1.0856757 |
| A_52_P6840 | 3884     | Detected | 3548.6   | Detected   | 4853.8   | Detected   | 5523.7   | Detected   | Snupn         | 1.422167868 | 1.24969104 | 1.5565857  | 1.367807  |
| A_55_P1959 | 928.8    | Detected | 1431.7   | Detected   | 1041.8   | Detected   | 1320.9   | Detected   | Zfp930        | 1.422157623 | 1.12166236 | 0.92260949 | 0.7276664 |
| A_52_P2006 | 25666.7  | Detected | 24004.3  | Detected   | 25711.3  | Detected   | 36501    | Detected   | Iars          | 1.422115036 | 1.00173766 | 1.52060256 | 1.0711123 |
| A_55_P2193 | 15.4     | Detected | 10.1     | Not Detect | 7.6      | Not Detect | 21.9     | Not Detect | 6720473M08Rik | 1.422077922 | 0.49350649 | 2.16831683 | 0.7524752 |
| A_55_P1964 | 6010.6   | Detected | 4442.6   | Detected   | 4346.1   | Detected   | 8546.6   | Detected   | Golga4        | 1.421921272 | 0.72307257 | 1.92378337 | 0.9782785 |
| A_55_P2062 | 23523.5  | Detected | 31826.7  | Detected   | 32774.5  | Detected   | 33447.8  | Detected   | Tomm5         | 1.42188875  | 1.39326631 | 1.05093522 | 1.02978   |
| A_55_P2381 | 202.9    | Detected | 161.6    | Detected   | 125.4    | Detected   | 288.5    | Detected   | Lias          | 1.421882701 | 0.61803844 | 1.78527228 | 0.7759901 |
| A_51_P4250 | 2610.3   | Detected | 2675.5   | Detected   | 3615.2   | Detected   | 3711.5   | Detected   | H2-Q2         | 1.421867218 | 1.38497491 | 1.38721734 | 1.3512241 |
| A_55_P2072 | 258.4    | Detected | 245.4    | Detected   | 213.7    | Detected   | 367.4    | Detected   | Pcmt1         | 1.421826625 | 0.82701238 | 1.49714751 | 0.8708231 |
| A_55_P2289 | 48.6     | Detected | 46       | Detected   | 34.1     | Detected   | 69.1     | Detected   | 170001D01Rik  | 1.4218107   | 0.70164609 | 1.50217391 | 0.7413043 |
| A_52_P5612 | 1722.2   | Detected | 1263.7   | Detected   | 2686.3   | Detected   | 2448.6   | Detected   | Stard4        | 1.421786088 | 1.55980722 | 1.93764343 | 2.1257419 |
| A_55_P2244 | 2999.1   | Detected | 2183.3   | Detected   | 3008.3   | Detected   | 4263.9   | Detected   | Klf13         | 1.421726518 | 1.00306759 | 1.95296111 | 1.3778684 |
| A_55_P2046 | 31.3     | Detected | 47.2     | Detected   | 25.2     | Detected   | 44.5     | Detected   | Cspg5         | 1.42172524  | 0.80511182 | 0.94279661 | 0.5338983 |
| A_52_P5411 | 5802.3   | Detected | 6302.1   | Detected   | 6641.2   | Detected   | 8248.4   | Detected   | Calu          | 1.421574203 | 1.1445806  | 1.30883356 | 1.0538075 |
| A_66_P1191 | 420.1    | Detected | 355.7    | Detected   | 410.4    | Detected   | 597.2    | Detected   | Phf21a        | 1.421566294 | 0.97691026 | 1.67894293 | 1.1537813 |
| A_52_P1540 | 121.7    | Detected | 97.5     | Detected   | 167.5    | Detected   | 173      | Detected   | Zcwpw1        | 1.421528348 | 1.37633525 | 1.77435897 | 1.7179487 |
| A_52_P4605 | 813.5    | Detected | 625.3    | Detected   | 781.4    | Detected   | 1156.4   | Detected   | Lpar2         | 1.421511985 | 0.96054087 | 1.84935231 | 1.2496402 |
| A_66_P1194 | 423.3    | Detected | 652.1    | Detected   | 558.8    | Detected   | 601.6    | Detected   | 6430531B16Rik | 1.421214269 | 1.32010395 | 0.92255789 | 0.8569238 |
| A_55_P1964 | 1181.6   | Detected | 1119.9   | Detected   | 1121.1   | Detected   | 1679.3   | Detected   | Pign          | 1.421208531 | 0.94879824 | 1.49950888 | 1.0010715 |
| A_55_P2037 | 4318.7   | Detected | 5685     | Detected   | 5610.8   | Detected   | 6137.7   | Detected   | Etv5          | 1.421191562 | 1.29918726 | 1.07963061 | 0.9869481 |
| A_55_P2065 | 806.3    | Detected | 761      | Detected   | 863.3    | Detected   | 1145.9   | Detected   | Gm15417       | 1.421183182 | 1.07069329 | 1.50578187 | 1.1344284 |
| A_52_P5930 | 25158.3  | Detected | 23394    | Detected   | 36322.2  | Detected   | 35753.6  | Detected   | Acs15         | 1.421145308 | 1.4437462  | 1.5283235  | 1.5526289 |
| A_55_P2111 | 38       | Detected | 38.4     | Detected   | 41.6     | Detected   | 54       | Not Detect | Rgs6          | 1.421052632 | 1.09473684 | 1.40625    | 1.0833333 |
| A_55_P1991 | 22758.3  | Detected | 19396.1  | Detected   | 29936.1  | Detected   | 32337.8  | Detected   | Aplp2         | 1.420923355 | 1.31539263 | 1.66723207 | 1.5434082 |
| A_55_P2113 | 49.9     | Detected | 41.7     | Detected   | 48.2     | Detected   | 70.9     | Detected   | Lrch3         | 1.420841683 | 0.96593186 | 1.70023981 | 1.1558753 |
| A_66_P1389 | 73.9     | Detected | 137      | Detected   | 29.2     | Detected   | 105      | Detected   | Fyn           | 1.420838972 | 0.39512855 | 0.76642336 | 0.2131387 |

|            |          |          |          |            |         |          |          |            |               |             |            |            |           |
|------------|----------|----------|----------|------------|---------|----------|----------|------------|---------------|-------------|------------|------------|-----------|
| A_66_P1216 | 886.9    | Detected | 1159.3   | Detected   | 951.5   | Detected | 1260.1   | Detected   | Rsrc1         | 1.420791521 | 1.07283797 | 1.08694902 | 0.8207539 |
| A_55_P1974 | 119.1    | Detected | 159      | Detected   | 109.4   | Detected | 169.2    | Detected   | Map2k7        | 1.420654912 | 0.91855584 | 1.06415094 | 0.6880503 |
| A_51_P3899 | 88.2     | Detected | 112.1    | Detected   | 275.1   | Detected | 125.3    | Detected   | Rgs14         | 1.420634921 | 3.11904762 | 1.11775201 | 2.4540589 |
| A_66_P1044 | 247.5    | Detected | 137.9    | Detected   | 426     | Detected | 351.6    | Detected   | Myrf          | 1.420606061 | 1.72121212 | 2.54967368 | 3.0891951 |
| A_55_P2083 | 23963.1  | Detected | 32611.9  | Detected   | 25515.1 | Detected | 34041.5  | Detected   | Atp13a1       | 1.420579975 | 1.06476624 | 1.04383676 | 0.7823862 |
| A_55_P2132 | 108.2    | Detected | 147.2    | Detected   | 114.8   | Detected | 153.7    | Detected   | Mageb1        | 1.42051756  | 1.06099815 | 1.04415761 | 0.7798913 |
| A_51_P4866 | 39       | Detected | 55.6     | Detected   | 49.4    | Detected | 55.4     | Detected   | Minos1        | 1.420512821 | 1.26666667 | 0.99640288 | 0.8884892 |
| A_55_P2072 | 1153.9   | Detected | 1205.6   | Detected   | 1297    | Detected | 1639.1   | Detected   | Tmem167b      | 1.420487044 | 1.12401421 | 1.359572   | 1.0758129 |
| A_55_P2098 | 1394.5   | Detected | 1317.7   | Detected   | 1556.8  | Detected | 1980.8   | Detected   | Tchp          | 1.420437433 | 1.1163858  | 1.50322532 | 1.1814525 |
| A_51_P4661 | 3713.3   | Detected | 4070.2   | Detected   | 7281.1  | Detected | 5273.7   | Detected   | Bckdha        | 1.420219212 | 1.96081652 | 1.29568572 | 1.7888802 |
| A_55_P2014 | 4605.3   | Detected | 4241.9   | Detected   | 4615.8  | Detected | 6540.4   | Detected   | Ccdc82        | 1.420189781 | 1.00227998 | 1.54185624 | 1.0881445 |
| A_51_P2017 | 6518.4   | Detected | 7220.8   | Detected   | 5652.6  | Detected | 9257.3   | Detected   | Tubgcp3       | 1.420179799 | 0.86717599 | 1.28203246 | 0.7828218 |
| A_55_P2145 | 23.8     | Detected | 13.4     | Not Detect | 25.3    | Detected | 33.8     | Not Detect | Atp6v1g3      | 1.420168067 | 1.06302521 | 2.52238806 | 1.8880597 |
| A_51_P2131 | 27353.4  | Detected | 37373.7  | Detected   | 30641.2 | Detected | 38844.9  | Detected   | Tmem208       | 1.420112308 | 1.12019712 | 1.03936458 | 0.81986   |
| A_52_P1548 | 319.3    | Detected | 360.5    | Detected   | 394.2   | Detected | 453.4    | Detected   | Ing3          | 1.419981209 | 1.23457563 | 1.25769764 | 1.0934813 |
| A_51_P3895 | 17762.4  | Detected | 22016.1  | Detected   | 13750.9 | Detected | 25219.9  | Detected   | Fam220a       | 1.419847543 | 0.77415777 | 1.14552078 | 0.6245838 |
| A_55_P2107 | 12748.1  | Detected | 16724.3  | Detected   | 16255.3 | Detected | 18099.4  | Detected   | LOC101056559  | 1.419772358 | 1.27511551 | 1.08222168 | 0.971957  |
| A_55_P2090 | 756.8    | Detected | 790.9    | Detected   | 917.1   | Detected | 1074.4   | Detected   | Nat9          | 1.419661734 | 1.2118129  | 1.3584524  | 1.1595651 |
| A_55_P1979 | 147848.4 | Detected | 146628.3 | Detected   | 208592  | Detected | 209806.7 | Detected   | Atf4          | 1.419066422 | 1.41085057 | 1.43087453 | 1.4225903 |
| A_52_P6600 | 95.7     | Detected | 93.9     | Detected   | 119.1   | Detected | 135.8    | Detected   | 1810034E14Rik | 1.419017764 | 1.24451411 | 1.44621938 | 1.2683706 |
| A_51_P2361 | 22327.9  | Detected | 21890.6  | Detected   | 26699.2 | Detected | 31682    | Detected   | Rit1          | 1.41894222  | 1.19577748 | 1.44728788 | 1.2196651 |
| A_52_P2701 | 19.1     | Detected | 3.8      | Not Detect | 32.4    | Detected | 27.1     | Not Detect | Mmp28         | 1.418848168 | 1.69633508 | 7.13157895 | 8.5263158 |
| A_55_P2021 | 331      | Detected | 310.1    | Detected   | 271.5   | Detected | 469.6    | Detected   | Mterf1b       | 1.418731118 | 0.82024169 | 1.51435021 | 0.875524  |
| A_55_P1999 | 304.1    | Detected | 297.6    | Detected   | 290.4   | Detected | 431.4    | Detected   | Inpp5b        | 1.418612299 | 0.95494903 | 1.44959677 | 0.9758065 |
| A_55_P2114 | 16164.3  | Detected | 25710.9  | Detected   | 14481   | Detected | 22929.6  | Detected   | Notum         | 1.418533435 | 0.89586311 | 0.89182409 | 0.5632242 |
| A_65_P0336 | 27       | Detected | 24.4     | Detected   | 18      | Detected | 38.3     | Not Detect | Dennd4a       | 1.418518519 | 0.66666667 | 1.56967213 | 0.7377049 |
| A_55_P2203 | 5937.9   | Detected | 5942.9   | Detected   | 7873.1  | Detected | 8423     | Detected   | Gt(ROSA)26Sor | 1.418514963 | 1.32590647 | 1.41732151 | 1.3247909 |
| A_51_P4657 | 444.1    | Detected | 344.7    | Detected   | 577.1   | Detected | 629.9    | Detected   | Lysmd4        | 1.41837424  | 1.2994821  | 1.82738613 | 1.6742095 |
| A_52_P1325 | 497.7    | Detected | 640.5    | Detected   | 881.2   | Detected | 705.8    | Detected   | Prune         | 1.418123367 | 1.7705445  | 1.1019516  | 1.3758002 |
| A_51_P1752 | 1410.6   | Detected | 1204.6   | Detected   | 1611.9  | Detected | 2000.4   | Detected   | Fbxl4         | 1.418119949 | 1.14270523 | 1.66063424 | 1.3381205 |
| A_51_P4967 | 42.1     | Detected | 40.8     | Detected   | 32.8    | Detected | 59.7     | Detected   | Dnmt3l        | 1.418052257 | 0.77909739 | 1.46323529 | 0.8039216 |
| A_55_P2078 | 4826.6   | Detected | 4365     | Detected   | 5566.5  | Detected | 6844.1   | Detected   | Stxbp3a       | 1.417996105 | 1.15329632 | 1.5679496  | 1.2752577 |
| A_51_P4178 | 466.1    | Detected | 855.4    | Detected   | 476.7   | Detected | 660.9    | Detected   | Rab20         | 1.417936065 | 1.0227419  | 0.772621   | 0.5572831 |
| A_52_P3912 | 331      | Detected | 497.9    | Detected   | 336.5   | Detected | 469.3    | Detected   | Terf2         | 1.417824773 | 1.01661631 | 0.94255875 | 0.6758385 |
| A_55_P2008 | 84.5     | Detected | 82.3     | Detected   | 100.6   | Detected | 119.8    | Detected   | Cox17         | 1.417751479 | 1.19053254 | 1.45565006 | 1.2223572 |
| A_51_P4819 | 69.9     | Detected | 289.4    | Detected   | 46.4    | Detected | 99.1     | Detected   | Cdh15         | 1.417739628 | 0.66380544 | 0.34243262 | 0.1603317 |
| A_55_P1981 | 71.1     | Detected | 146.7    | Detected   | 280.4   | Detected | 100.8    | Detected   | Lman1l        | 1.417721519 | 3.94374121 | 0.68711656 | 1.9113838 |
| A_51_P4915 | 1884.8   | Detected | 1597     | Detected   | 1561.2  | Detected | 2672.1   | Detected   | AW549877      | 1.417710102 | 0.8283107  | 1.67319975 | 0.977583  |
| A_55_P2019 | 46.7     | Detected | 131.1    | Detected   | 20.3    | Detected | 66.2     | Detected   | Acacb         | 1.417558887 | 0.43468951 | 0.50495805 | 0.1548436 |
| A_55_P2219 | 29.7     | Detected | 24.5     | Detected   | 31.9    | Detected | 42.1     | Not Detect | AI413759      | 1.417508418 | 1.07407407 | 1.71836735 | 1.3020408 |

|            |         |            |         |            |         |            |         |            |               |             |            |            |           |
|------------|---------|------------|---------|------------|---------|------------|---------|------------|---------------|-------------|------------|------------|-----------|
| A_51_P3236 | 39486.9 | Detected   | 48253.2 | Detected   | 52874   | Detected   | 55972.5 | Detected   | Thyn1         | 1.417495423 | 1.33902636 | 1.15997488 | 1.0957615 |
| A_55_P2184 | 38833.5 | Detected   | 35347.2 | Detected   | 51600.8 | Detected   | 55037.8 | Detected   | Ndufa3        | 1.417276321 | 1.32877026 | 1.55706251 | 1.4598271 |
| A_55_P2272 | 16.3    | Detected   | 14.2    | Not Detect | 38.9    | Detected   | 23.1    | Not Detect | 4930500G05Rik | 1.417177914 | 2.38650307 | 1.62676056 | 2.7394366 |
| A_55_P2062 | 501.4   | Detected   | 653     | Detected   | 432.3   | Detected   | 710.5   | Detected   | 4921524J17Rik | 1.41703231  | 0.86218588 | 1.08805513 | 0.6620214 |
| A_51_P2973 | 23.5    | Detected   | 20.6    | Detected   | 21      | Detected   | 33.3    | Not Detect | Olf530        | 1.417021277 | 0.89361702 | 1.61650485 | 1.0194175 |
| A_51_P4682 | 3134.9  | Detected   | 2873.7  | Detected   | 2699.5  | Detected   | 4442.2  | Detected   | Polg          | 1.417014897 | 0.861112   | 1.54581202 | 0.9393813 |
| A_55_P1979 | 92.1    | Detected   | 111.2   | Detected   | 99.4    | Detected   | 130.5   | Detected   | Il9r          | 1.416938111 | 1.07926167 | 1.17356115 | 0.8938849 |
| A_51_P4109 | 405.5   | Detected   | 394.8   | Detected   | 448.4   | Detected   | 574.5   | Detected   | Gm9856        | 1.41676942  | 1.10579531 | 1.45516717 | 1.1357649 |
| A_52_P3397 | 1563.3  | Detected   | 1937.4  | Detected   | 1332.1  | Detected   | 2214.7  | Detected   | Cyb5r3        | 1.416682658 | 0.85210772 | 1.14312997 | 0.687571  |
| A_55_P2414 | 6       | Not Detect | 34.3    | Detected   | 4.3     | Not Detect | 8.5     | Not Detect | 4933433F19Rik | 1.416666667 | 0.71666667 | 0.24781341 | 0.1253644 |
| A_52_P4833 | 1058    | Detected   | 1436    | Detected   | 1262.8  | Detected   | 1498.8  | Detected   | Mios          | 1.416635161 | 1.19357278 | 1.04373259 | 0.8793872 |
| A_51_P4292 | 2734.2  | Detected   | 4233.7  | Detected   | 3621    | Detected   | 3873    | Detected   | Pus10         | 1.416502085 | 1.32433619 | 0.91480265 | 0.8552803 |
| A_51_P4172 | 338.6   | Detected   | 237.1   | Detected   | 451.1   | Detected   | 479.6   | Detected   | 0610012G03Rik | 1.416420555 | 1.33225044 | 2.0227752  | 1.9025728 |
| A_52_P4549 | 25533.3 | Detected   | 17618   | Detected   | 29790.9 | Detected   | 36164.2 | Detected   | Pi4ka         | 1.416354329 | 1.16674695 | 2.05268475 | 1.6909354 |
| A_52_P6045 | 6400.8  | Detected   | 8510.1  | Detected   | 8791.5  | Detected   | 9064.9  | Detected   | Mrpl19        | 1.416213598 | 1.37350019 | 1.06519312 | 1.0330666 |
| A_55_P2093 | 31      | Detected   | 46.3    | Detected   | 35.9    | Detected   | 43.9    | Not Detect | Rell2         | 1.416129032 | 1.15806452 | 0.94816415 | 0.775378  |
| A_65_P0829 | 5434.5  | Detected   | 6362.4  | Detected   | 7311.6  | Detected   | 7695.8  | Detected   | Gpalpp1       | 1.416100837 | 1.34540436 | 1.209575   | 1.149189  |
| A_55_P2150 | 22705.1 | Detected   | 25404.3 | Detected   | 15356   | Detected   | 32151   | Detected   | Piezo1        | 1.416025474 | 0.67632382 | 1.26557315 | 0.6044646 |
| A_51_P1700 | 1758    | Detected   | 1769.6  | Detected   | 1775.6  | Detected   | 2489.3  | Detected   | Napg          | 1.415984073 | 1.01001138 | 1.40670208 | 1.0033906 |
| A_52_P1452 | 85.4    | Detected   | 70.1    | Detected   | 74.3    | Detected   | 120.9   | Detected   | Zyg11b        | 1.415690867 | 0.87002342 | 1.72467903 | 1.0599144 |
| A_52_P4574 | 38443.8 | Detected   | 40339.3 | Detected   | 52975.9 | Detected   | 54418   | Detected   | Ubl5          | 1.415520838 | 1.37800894 | 1.34900705 | 1.3132578 |
| A_55_P1991 | 3031.7  | Detected   | 3131    | Detected   | 2935.5  | Detected   | 4291.3  | Detected   | Zfp956        | 1.415476465 | 0.96826863 | 1.37058448 | 0.9375599 |
| A_55_P1960 | 2659.7  | Detected   | 2378.1  | Detected   | 2711    | Detected   | 3764.5  | Detected   | 2810408A11Rik | 1.415385194 | 1.01928789 | 1.58298642 | 1.1399857 |
| A_55_P2083 | 7857.7  | Detected   | 7001.1  | Detected   | 9224.7  | Detected   | 11119.4 | Detected   | Fam129a       | 1.41509602  | 1.17396948 | 1.58823613 | 1.3176072 |
| A_52_P6769 | 3432.7  | Detected   | 3392.6  | Detected   | 4150.1  | Detected   | 4857.1  | Detected   | Tirap         | 1.414950331 | 1.20899001 | 1.43167482 | 1.2232801 |
| A_55_P1984 | 1244.1  | Detected   | 1646.9  | Detected   | 1915.8  | Detected   | 1759.9  | Detected   | Cdadc1        | 1.414596897 | 1.53990837 | 1.06861376 | 1.1632765 |
| A_52_P6708 | 3640.5  | Detected   | 4651.3  | Detected   | 5239.4  | Detected   | 5149.3  | Detected   | Ebag9         | 1.414448565 | 1.43919791 | 1.10706684 | 1.1264378 |
| A_55_P1970 | 11.1    | Not Detect | 51.9    | Detected   | 35.4    | Detected   | 15.7    | Not Detect | 2010107G12Rik | 1.414414414 | 3.18918919 | 0.30250482 | 0.6820809 |
| A_55_P2112 | 621.8   | Detected   | 688.3   | Detected   | 644.4   | Detected   | 879.4   | Detected   | Vwa8          | 1.414281119 | 1.03634609 | 1.27764056 | 0.9362197 |
| A_55_P2032 | 484.7   | Detected   | 283     | Detected   | 473.6   | Detected   | 685.5   | Detected   | Inpp5e        | 1.414276872 | 0.97709924 | 2.42226148 | 1.6734982 |
| A_66_P1351 | 9.9     | Not Detect | 20.8    | Detected   | 21      | Detected   | 14      | Not Detect | Gm8149        | 1.414141414 | 2.12121212 | 0.67307692 | 1.0096154 |
| A_51_P4351 | 6295.5  | Detected   | 9554.6  | Detected   | 11904.2 | Detected   | 8902.2  | Detected   | Cryz          | 1.41405766  | 1.8909062  | 0.93171875 | 1.245913  |
| A_52_P4804 | 1856.8  | Detected   | 1649    | Detected   | 2276.5  | Detected   | 2624.4  | Detected   | Avl9          | 1.413399397 | 1.22603404 | 1.59151001 | 1.3805337 |
| A_55_P2097 | 915.1   | Detected   | 996.4   | Detected   | 789.6   | Detected   | 1293.4  | Detected   | Idua          | 1.413397443 | 0.86285652 | 1.29807306 | 0.7924528 |
| A_55_P2055 | 1168.6  | Detected   | 1118.5  | Detected   | 2067.6  | Detected   | 1651.6  | Detected   | Sdsl          | 1.413315078 | 1.76929659 | 1.47662047 | 1.8485472 |
| A_51_P1990 | 5924.6  | Detected   | 6966    | Detected   | 5744.2  | Detected   | 8373.2  | Detected   | Tmem107       | 1.413293724 | 0.96955069 | 1.20200976 | 0.8246052 |
| A_55_P2054 | 387.6   | Detected   | 817.3   | Detected   | 420.6   | Detected   | 547.7   | Detected   | Rnd1          | 1.413054696 | 1.08513932 | 0.67013337 | 0.5146213 |
| A_51_P1995 | 3818.2  | Detected   | 5975.9  | Detected   | 3498.3  | Detected   | 5395.1  | Detected   | Med26         | 1.412995652 | 0.91621707 | 0.90280962 | 0.5854014 |
| A_55_P2057 | 374.1   | Detected   | 234.5   | Detected   | 553.1   | Detected   | 528.6   | Detected   | Sft2d3        | 1.412991179 | 1.47848169 | 2.25415778 | 2.3586354 |
| A_66_P1217 | 58706.7 | Detected   | 69007.5 | Detected   | 68823.8 | Detected   | 82947.9 | Detected   | Tmem59        | 1.412920501 | 1.17233297 | 1.20201282 | 0.997338  |

|            |                  |                  |                  |                  |               |             |            |            |           |
|------------|------------------|------------------|------------------|------------------|---------------|-------------|------------|------------|-----------|
| A_55_P2155 | 41.9 Detected    | 65.2 Detected    | 38.3 Detected    | 59.2 Detected    | Grk4          | 1.412887828 | 0.91408115 | 0.90797546 | 0.5874233 |
| A_52_P5172 | 291.9 Detected   | 391.2 Detected   | 317.8 Detected   | 412.4 Detected   | Akap1         | 1.412812607 | 1.08872902 | 1.05419223 | 0.8123722 |
| A_55_P2123 | 104.2 Detected   | 124 Detected     | 78.1 Detected    | 147.2 Detected   | Zfp867        | 1.412667946 | 0.74952015 | 1.18709677 | 0.6298387 |
| A_55_P2149 | 403.6 Detected   | 349.2 Detected   | 491 Detected     | 570.1 Detected   | Kifc2         | 1.412537166 | 1.21655104 | 1.63258877 | 1.406071  |
| A_52_P4966 | 1280.1 Detected  | 1592.1 Detected  | 907.5 Detected   | 1808.1 Detected  | Leprotl1      | 1.412467776 | 0.70892899 | 1.13566987 | 0.5700019 |
| A_55_P2004 | 1198.2 Detected  | 1230.5 Detected  | 1608.5 Detected  | 1692.4 Detected  | Asb8          | 1.412452011 | 1.34243031 | 1.37537586 | 1.3071922 |
| A_55_P2012 | 478.3 Detected   | 347.7 Detected   | 249.9 Detected   | 675.5 Detected   | B930041F14Rik | 1.41229354  | 0.52247543 | 1.94276675 | 0.718723  |
| A_51_P4694 | 34.2 Detected    | 24.3 Detected    | 36 Detected      | 48.3 Not Detect  | Gm11149       | 1.412280702 | 1.05263158 | 1.98765432 | 1.4814815 |
| A_55_P1987 | 329.2 Detected   | 343.2 Detected   | 276.3 Detected   | 464.9 Detected   | Gm3448        | 1.412211422 | 0.83930741 | 1.35460373 | 0.8050699 |
| A_52_P6337 | 99 Detected      | 64.9 Detected    | 116.4 Detected   | 139.8 Detected   | Gm11696       | 1.412121212 | 1.17575758 | 2.1540832  | 1.7935285 |
| A_55_P2164 | 16.5 Detected    | 3.1 Not Detect   | 3.1 Not Detect   | 23.3 Not Detect  | Pr17b1        | 1.412121212 | 0.18787879 | 7.51612903 | 1         |
| A_55_P2075 | 39.8 Detected    | 50.7 Detected    | 41.8 Detected    | 56.2 Detected    | Ttl3          | 1.412060302 | 1.05025126 | 1.10848126 | 0.8244576 |
| A_55_P2027 | 116.8 Detected   | 169 Detected     | 147.2 Detected   | 164.9 Detected   | Ctu2          | 1.411815068 | 1.26027397 | 0.97573964 | 0.8710059 |
| A_51_P1200 | 276.6 Detected   | 276 Detected     | 248.2 Detected   | 390.5 Detected   | 9330151L19Rik | 1.411785973 | 0.89732466 | 1.41485507 | 0.8992754 |
| A_55_P2172 | 470.4 Detected   | 569 Detected     | 493.7 Detected   | 664.1 Detected   | Ubn2          | 1.411777211 | 1.04953231 | 1.16713533 | 0.8676626 |
| A_55_P2057 | 39.1 Detected    | 37.1 Detected    | 41.8 Detected    | 55.2 Detected    | Magix         | 1.411764706 | 1.06905371 | 1.48787062 | 1.1266846 |
| A_55_P2163 | 602.7 Detected   | 1027.2 Detected  | 644.1 Detected   | 850.7 Detected   | Ier2          | 1.411481666 | 1.06869089 | 0.82817368 | 0.6270444 |
| A_51_P2608 | 55128.8 Detected | 50598.3 Detected | 71038.7 Detected | 77810.7 Detected | Sdhd          | 1.411434677 | 1.28859507 | 1.53781254 | 1.403974  |
| A_55_P2302 | 51.3 Detected    | 38.9 Detected    | 39.8 Detected    | 72.4 Detected    | 3300002A11Rik | 1.411306043 | 0.77582846 | 1.86118252 | 1.0231362 |
| A_51_P2254 | 7426.7 Detected  | 6958.2 Detected  | 11230.6 Detected | 10481.2 Detected | Pkp2          | 1.411286305 | 1.51219249 | 1.5063091  | 1.6140094 |
| A_55_P2001 | 160 Detected     | 286.6 Detected   | 208.7 Detected   | 225.8 Detected   | Ppp2r3c       | 1.41125     | 1.304375   | 0.78785764 | 0.7281926 |
| A_55_P2019 | 925.5 Detected   | 800.1 Detected   | 1409.8 Detected  | 1306 Detected    | 1500011B03Rik | 1.411129119 | 1.52328471 | 1.63229596 | 1.7620297 |
| A_55_P2099 | 16.3 Detected    | 14.4 Not Detect  | 6.2 Not Detect   | 23 Not Detect    | Gm4151        | 1.411042945 | 0.3803681  | 1.59722222 | 0.4305556 |
| A_51_P4887 | 900.7 Detected   | 1014.1 Detected  | 1035.8 Detected  | 1270.9 Detected  | Slc25a44      | 1.411013656 | 1.14999445 | 1.25322946 | 1.0213983 |
| A_52_P8750 | 20.2 Detected    | 30 Detected      | 32.6 Detected    | 28.5 Not Detect  | Hbq1b         | 1.410891089 | 1.61386139 | 0.95       | 1.0866667 |
| A_52_P1567 | 16.8 Detected    | 24.4 Detected    | 13.5 Not Detect  | 23.7 Not Detect  | Adamts14      | 1.410714286 | 0.80357143 | 0.97131148 | 0.5532787 |
| A_51_P5211 | 24827.4 Detected | 21879.6 Detected | 33379.4 Detected | 35024.3 Detected | Rassf7        | 1.410711553 | 1.34445814 | 1.60077424 | 1.5255946 |
| A_55_P2037 | 945.1 Detected   | 1107.7 Detected  | 1202.7 Detected  | 1333.2 Detected  | AA684185      | 1.410644376 | 1.27256375 | 1.20357498 | 1.0857633 |
| A_51_P1540 | 459.8 Detected   | 572.9 Detected   | 610.8 Detected   | 648.6 Detected   | Mettl3        | 1.41061331  | 1.32840365 | 1.13213475 | 1.0661547 |
| A_65_P0903 | 1742.9 Detected  | 1476.3 Detected  | 3020.7 Detected  | 2458.3 Detected  | Cdc42se2      | 1.410465316 | 1.73314591 | 1.66517645 | 2.0461288 |
| A_55_P2169 | 15674.8 Detected | 12800.9 Detected | 15047.6 Detected | 22106.1 Detected | Atp6v1a       | 1.410295506 | 0.95998673 | 1.72691764 | 1.1755111 |
| A_55_P1992 | 79.7 Detected    | 74.1 Detected    | 70.8 Detected    | 112.4 Detected   | Rbbp8nl       | 1.410288582 | 0.88833124 | 1.5168691  | 0.9554656 |
| A_51_P2517 | 5394.8 Detected  | 5543.6 Detected  | 6443.9 Detected  | 7608 Detected    | I7Rn6         | 1.410246904 | 1.19446504 | 1.37239339 | 1.1624035 |
| A_55_P1962 | 371.3 Detected   | 360.3 Detected   | 359.6 Detected   | 523.6 Detected   | LOC101055716  | 1.410180447 | 0.96848909 | 1.45323342 | 0.9980572 |
| A_51_P1356 | 6508.8 Detected  | 5795.7 Detected  | 7346.8 Detected  | 9176.7 Detected  | Eif4ebp2      | 1.409891224 | 1.12874877 | 1.58336353 | 1.2676294 |
| A_55_P2162 | 351.4 Detected   | 1677.4 Detected  | 323.4 Detected   | 495.4 Detected   | Tmem179       | 1.409789414 | 0.92031873 | 0.29533802 | 0.1927984 |
| A_51_P2328 | 6549.8 Detected  | 7843.7 Detected  | 7941.1 Detected  | 9233 Detected    | Rpl14         | 1.409661364 | 1.2124187  | 1.17712304 | 1.0124176 |
| A_55_P1998 | 15890.2 Detected | 12142.1 Detected | 16380.6 Detected | 22399.5 Detected | Ncdn          | 1.409642421 | 1.03086179 | 1.84477973 | 1.3490747 |
| A_51_P3238 | 31407.9 Detected | 46512.7 Detected | 28079.4 Detected | 44272.3 Detected | Fam96b        | 1.409591217 | 0.89402348 | 0.95183251 | 0.6036932 |
| A_51_P3933 | 37.6 Detected    | 43.7 Detected    | 34.6 Detected    | 53 Detected      | Pikfyve       | 1.409574468 | 0.92021277 | 1.21281465 | 0.791762  |

|            |         |            |         |            |         |            |         |            |               |             |            |            |           |
|------------|---------|------------|---------|------------|---------|------------|---------|------------|---------------|-------------|------------|------------|-----------|
| A_55_P2168 | 155.8   | Detected   | 158.1   | Detected   | 183.9   | Detected   | 219.6   | Detected   | Pced1b        | 1.409499358 | 1.18035944 | 1.38899431 | 1.1631879 |
| A_55_P2002 | 405.9   | Detected   | 607.4   | Detected   | 460.5   | Detected   | 572.1   | Detected   | Ccdc67        | 1.409460458 | 1.13451589 | 0.94188344 | 0.7581495 |
| A_51_P4469 | 22971.6 | Detected   | 34177.5 | Detected   | 20226.3 | Detected   | 32377.4 | Detected   | Cfdp1         | 1.409453412 | 0.88049156 | 0.94733085 | 0.5918016 |
| A_55_P2052 | 982.8   | Detected   | 1129.7  | Detected   | 318.8   | Detected   | 1385.1  | Detected   | Fam73a        | 1.409340659 | 0.32437932 | 1.22607772 | 0.2821988 |
| A_52_P1685 | 203.5   | Detected   | 353.3   | Detected   | 581.6   | Detected   | 286.8   | Detected   | Cebpa         | 1.409336609 | 2.85798526 | 0.8117747  | 1.646193  |
| A_55_P1958 | 190.8   | Detected   | 161.4   | Detected   | 308.5   | Detected   | 268.9   | Detected   | Crebl2        | 1.40932914  | 1.61687631 | 1.66604709 | 1.9114002 |
| A_55_P1961 | 192.8   | Detected   | 173.5   | Detected   | 159.1   | Detected   | 271.7   | Detected   | Gm12472       | 1.409232365 | 0.82520747 | 1.56599424 | 0.9170029 |
| A_52_P2835 | 1049.1  | Detected   | 891.1   | Detected   | 843.4   | Detected   | 1478.2  | Detected   | Rcan3         | 1.409017253 | 0.80392718 | 1.65884861 | 0.9464707 |
| A_55_P1979 | 97.8    | Detected   | 99.1    | Detected   | 114.9   | Detected   | 137.8   | Detected   | Tbata         | 1.408997955 | 1.17484663 | 1.39051463 | 1.1594349 |
| A_51_P1187 | 775.7   | Detected   | 741.6   | Detected   | 672.7   | Detected   | 1092.8  | Detected   | Ap5z1         | 1.408792059 | 0.86721671 | 1.47357066 | 0.9070928 |
| A_55_P2112 | 3137.9  | Detected   | 2252.2  | Detected   | 2270    | Detected   | 4420.1  | Detected   | Lgals8        | 1.408617228 | 0.72341375 | 1.96256993 | 1.0079034 |
| A_55_P2021 | 136.4   | Detected   | 129.2   | Detected   | 138.9   | Detected   | 192.1   | Detected   | Olf700        | 1.408357771 | 1.01832845 | 1.48684211 | 1.0750774 |
| A_66_P1151 | 2535.4  | Detected   | 2346    | Detected   | 2645.8  | Detected   | 3570.1  | Detected   | Wwtr1         | 1.408101286 | 1.04354343 | 1.52178176 | 1.127792  |
| A_66_P1014 | 22.3    | Detected   | 47.7    | Detected   | 21.2    | Detected   | 31.4    | Not Detect | 2310026L22Rik | 1.408071749 | 0.95067265 | 0.65828092 | 0.4444444 |
| A_55_P2133 | 17.4    | Detected   | 10.6    | Not Detect | 11      | Not Detect | 24.5    | Not Detect | Ndufa5        | 1.408045977 | 0.63218391 | 2.31132075 | 1.0377358 |
| A_55_P2117 | 183.1   | Detected   | 239     | Detected   | 158.1   | Detected   | 257.8   | Detected   | Ccnj          | 1.407973785 | 0.86346259 | 1.07866109 | 0.6615063 |
| A_52_P3714 | 116.2   | Detected   | 90.8    | Detected   | 117.3   | Detected   | 163.6   | Detected   | Sbf2          | 1.407917384 | 1.00946644 | 1.80176211 | 1.2918502 |
| A_55_P2042 | 51.5    | Detected   | 102.8   | Detected   | 45.7    | Detected   | 72.5    | Detected   | Fam161a       | 1.40776699  | 0.88737864 | 0.70525292 | 0.4445525 |
| A_66_P1162 | 15.7    | Detected   | 26.4    | Detected   | 27.9    | Detected   | 22.1    | Not Detect | Gas2l2        | 1.407643312 | 1.77707006 | 0.83712121 | 1.0568182 |
| A_55_P2014 | 18.4    | Detected   | 20.7    | Detected   | 14.4    | Not Detect | 25.9    | Not Detect | Gm318         | 1.407608696 | 0.7826087  | 1.25120773 | 0.6956522 |
| A_55_P2049 | 70020.2 | Detected   | 73008.8 | Detected   | 93906.7 | Detected   | 98557.4 | Detected   | Dbi           | 1.407556677 | 1.34113727 | 1.34993864 | 1.2862381 |
| A_55_P2062 | 952.3   | Detected   | 1159.4  | Detected   | 769.7   | Detected   | 1340.4  | Detected   | Nasp          | 1.407539641 | 0.8082537  | 1.15611523 | 0.6638779 |
| A_55_P2083 | 5263    | Detected   | 4244.4  | Detected   | 7820.3  | Detected   | 7407.6  | Detected   | Pkp4          | 1.407486225 | 1.48590158 | 1.74526435 | 1.8424984 |
| A_52_P2998 | 1303.3  | Detected   | 1329.6  | Detected   | 1039.8  | Detected   | 1834.3  | Detected   | Sh3rf1        | 1.4074273   | 0.79782092 | 1.37958785 | 0.7820397 |
| A_51_P2303 | 10.8    | Not Detect | 22.5    | Detected   | 24.2    | Detected   | 15.2    | Not Detect | Efcab3        | 1.407407407 | 2.24074074 | 0.67555556 | 1.0755556 |
| A_55_P2040 | 58.2    | Detected   | 54.1    | Detected   | 60.8    | Detected   | 81.9    | Detected   | Susd2         | 1.407216495 | 1.04467354 | 1.51386322 | 1.1238447 |
| A_52_P5822 | 1108.1  | Detected   | 1082.8  | Detected   | 1157.8  | Detected   | 1559.3  | Detected   | Ikzf5         | 1.407183467 | 1.04485155 | 1.4400628  | 1.0692649 |
| A_55_P2022 | 3568.2  | Detected   | 2538.6  | Detected   | 3335.6  | Detected   | 5021.1  | Detected   | Klf13         | 1.407180091 | 0.93481307 | 1.97790121 | 1.3139526 |
| A_55_P2035 | 4006.2  | Detected   | 4893.8  | Detected   | 3669.2  | Detected   | 5636.8  | Detected   | 2610002J02Rik | 1.40701912  | 0.91588039 | 1.15182476 | 0.749765  |
| A_55_P2308 | 199.5   | Detected   | 328.3   | Detected   | 231.7   | Detected   | 280.7   | Detected   | E130110022Rik | 1.407017544 | 1.16140351 | 0.85501066 | 0.7057569 |
| A_52_P5542 | 6274.6  | Detected   | 6867    | Detected   | 7462.5  | Detected   | 8828.4  | Detected   | Ilf3          | 1.407006024 | 1.18931884 | 1.28562691 | 1.0867191 |
| A_55_P2035 | 4724.9  | Detected   | 6380.2  | Detected   | 1323.5  | Detected   | 6647.9  | Detected   | Aebp1         | 1.406992741 | 0.28011175 | 1.04195793 | 0.2074386 |
| A_55_P2131 | 6276    | Detected   | 5418.1  | Detected   | 6411.4  | Detected   | 8829.8  | Detected   | Atp6v1a       | 1.406915233 | 1.02157425 | 1.62968568 | 1.1833299 |
| A_55_P2420 | 5175    | Detected   | 3881.4  | Detected   | 6529.6  | Detected   | 7280.2  | Detected   | Igip          | 1.406801932 | 1.26175845 | 1.87566342 | 1.6822796 |
| A_55_P2051 | 273.6   | Detected   | 220.1   | Detected   | 266.8   | Detected   | 384.9   | Detected   | Tbcd          | 1.406798246 | 0.9751462  | 1.74875057 | 1.2121763 |
| A_55_P1973 | 28128.2 | Detected   | 30909.3 | Detected   | 29816.3 | Detected   | 39569.5 | Detected   | Unc5b         | 1.406755498 | 1.06001451 | 1.28018105 | 0.9646385 |
| A_55_P1977 | 373.2   | Detected   | 375.3   | Detected   | 327.2   | Detected   | 525     | Detected   | Ttc14         | 1.406752412 | 0.87674169 | 1.3988809  | 0.8718359 |
| A_52_P5364 | 31265.5 | Detected   | 33611.2 | Detected   | 38676   | Detected   | 43980.4 | Detected   | Mogs          | 1.406675089 | 1.23701844 | 1.30850431 | 1.1506879 |
| A_55_P2111 | 105.3   | Detected   | 134.1   | Detected   | 84.7    | Detected   | 148.1   | Detected   | Zfp157        | 1.40645774  | 0.80436847 | 1.1043997  | 0.6316182 |
| A_51_P4943 | 16319.7 | Detected   | 18900.8 | Detected   | 19046.7 | Detected   | 22951.4 | Detected   | Mbnl2         | 1.406361637 | 1.16709866 | 1.21430839 | 1.0077192 |

|            |          |            |          |            |          |            |          |            |               |             |            |            |           |
|------------|----------|------------|----------|------------|----------|------------|----------|------------|---------------|-------------|------------|------------|-----------|
| A_52_P5814 | 23298.1  | Detected   | 19075.4  | Detected   | 24064.6  | Detected   | 32764.7  | Detected   | Wasf2         | 1.406324979 | 1.03289968 | 1.71764157 | 1.2615515 |
| A_52_P3016 | 6.4      | Not Detect | 23.6     | Detected   | 5.1      | Not Detect | 9        | Not Detect | Gm4794        | 1.40625     | 0.796875   | 0.38135593 | 0.2161017 |
| A_55_P2329 | 19.7     | Detected   | 20.2     | Detected   | 15.1     | Not Detect | 27.7     | Not Detect | D130017N08Rik | 1.406091371 | 0.76649746 | 1.37128713 | 0.7475248 |
| A_51_P3303 | 5370.7   | Detected   | 6423.2   | Detected   | 4470.1   | Detected   | 7551.6   | Detected   | Ssx2ip        | 1.406073696 | 0.83231236 | 1.17567568 | 0.6959304 |
| A_55_P2154 | 173237.9 | Detected   | 187464.5 | Detected   | 210508.6 | Detected   | 243582.8 | Detected   | Gm10080       | 1.406059529 | 1.21514172 | 1.29935428 | 1.1229251 |
| A_55_P2018 | 63.3     | Detected   | 72.6     | Detected   | 29.2     | Detected   | 89       | Detected   | Sycp1         | 1.40600316  | 0.46129542 | 1.22589532 | 0.4022039 |
| A_51_P2399 | 26222.2  | Detected   | 39264.1  | Detected   | 25107.1  | Detected   | 36867.1  | Detected   | Polr2c        | 1.40594992  | 0.95747496 | 0.93895187 | 0.6394416 |
| A_55_P2048 | 21798.9  | Detected   | 26354.4  | Detected   | 23928    | Detected   | 30646.7  | Detected   | Gm8738        | 1.405882866 | 1.09767007 | 1.16286844 | 0.9079319 |
| A_51_P4574 | 21584.6  | Detected   | 17537.4  | Detected   | 37911.3  | Detected   | 30342.8  | Detected   | Tmem223       | 1.405761515 | 1.75640503 | 1.73017665 | 2.1617401 |
| A_55_P2074 | 12682.6  | Detected   | 11491.2  | Detected   | 16600.8  | Detected   | 17827.9  | Detected   | Exosc7        | 1.40569757  | 1.30894296 | 1.55143936 | 1.4446533 |
| A_55_P1953 | 1277.9   | Detected   | 1272.6   | Detected   | 1610.6   | Detected   | 1796.3   | Detected   | E130311K13Rik | 1.405665545 | 1.26034901 | 1.41151972 | 1.265598  |
| A_51_P4875 | 57.7     | Detected   | 48.7     | Detected   | 61.8     | Detected   | 81.1     | Detected   | Cd7           | 1.405545927 | 1.07105719 | 1.66529774 | 1.2689938 |
| A_55_P1967 | 13635.1  | Detected   | 16646.2  | Detected   | 17825    | Detected   | 19163.3  | Detected   | Use1          | 1.405438904 | 1.30728781 | 1.15121169 | 1.070815  |
| A_55_P2162 | 18.5     | Detected   | 18.3     | Detected   | 21       | Detected   | 26       | Not Detect | Art3          | 1.405405405 | 1.13513514 | 1.42076503 | 1.147541  |
| A_51_P2728 | 5458.2   | Detected   | 7013.6   | Detected   | 5895.8   | Detected   | 7670.3   | Detected   | Map2k3        | 1.405280129 | 1.08017295 | 1.09363237 | 0.8406239 |
| A_66_P1109 | 511.5    | Detected   | 535.9    | Detected   | 535.9    | Detected   | 718.8    | Detected   | Msantd2       | 1.405278592 | 1.04770283 | 1.34129502 | 1         |
| A_52_P2682 | 816.9    | Detected   | 698.1    | Detected   | 885.7    | Detected   | 1147.7   | Detected   | Zfp507        | 1.404945526 | 1.08422083 | 1.64403381 | 1.2687294 |
| A_55_P2047 | 40.5     | Detected   | 41.7     | Detected   | 39.6     | Detected   | 56.9     | Detected   | Mylk2         | 1.404938272 | 0.97777778 | 1.36450839 | 0.9496403 |
| A_55_P2163 | 37.3     | Detected   | 48.4     | Detected   | 37.5     | Detected   | 52.4     | Detected   | Olf611        | 1.404825737 | 1.00536193 | 1.08264463 | 0.7747934 |
| A_55_P2081 | 1097.1   | Detected   | 1125.4   | Detected   | 2074.2   | Detected   | 1541.2   | Detected   | Dennd5b       | 1.404794458 | 1.89062073 | 1.36946863 | 1.843078  |
| A_55_P1961 | 13.1     | Not Detect | 9.2      | Not Detect | 23.2     | Detected   | 18.4     | Not Detect | Cd72          | 1.404580153 | 1.77099237 | 2          | 2.5217391 |
| A_55_P2184 | 67.5     | Detected   | 107      | Detected   | 67.3     | Detected   | 94.8     | Detected   | Rnpc3         | 1.404444444 | 0.99703704 | 0.88598131 | 0.628972  |
| A_55_P2008 | 21751.9  | Detected   | 21181.1  | Detected   | 26178.3  | Detected   | 30543.6  | Detected   | Mpc1          | 1.404180784 | 1.20349487 | 1.44202142 | 1.2359273 |
| A_55_P2059 | 956.3    | Detected   | 854.5    | Detected   | 847.6    | Detected   | 1342.8   | Detected   | Dtx3l         | 1.404161874 | 0.88633274 | 1.57144529 | 0.9919251 |
| A_66_P1167 | 3850.5   | Detected   | 2972.7   | Detected   | 3361.9   | Detected   | 5405.6   | Detected   | Vps8          | 1.403869627 | 0.87310739 | 1.81841424 | 1.1309247 |
| A_55_P2120 | 15.6     | Detected   | 13       | Not Detect | 9.6      | Not Detect | 21.9     | Not Detect | Krt72         | 1.403846154 | 0.61538462 | 1.68461538 | 0.7384615 |
| A_52_P6760 | 1294.3   | Detected   | 1220.4   | Detected   | 1558.5   | Detected   | 1816.9   | Detected   | Tmem126b      | 1.403770378 | 1.20412578 | 1.48877417 | 1.2770403 |
| A_51_P2356 | 288.3    | Detected   | 1111.6   | Detected   | 242      | Detected   | 404.7    | Detected   | Alox5ap       | 1.403746098 | 0.8394034  | 0.36406981 | 0.2177042 |
| A_52_P2226 | 92.4     | Detected   | 234.5    | Detected   | 95.6     | Detected   | 129.7    | Detected   | Hspb2         | 1.403679654 | 1.03463203 | 0.55309168 | 0.4076759 |
| A_55_P2235 | 6505.7   | Detected   | 9516.7   | Detected   | 5825.2   | Detected   | 9131.4   | Detected   | 6230415J03Rik | 1.40359992  | 0.89539942 | 0.95951328 | 0.6121029 |
| A_55_P2119 | 13831.5  | Detected   | 15038.4  | Detected   | 15309.2  | Detected   | 19412.8  | Detected   | Yipf1         | 1.403520949 | 1.10683585 | 1.29088201 | 1.0180072 |
| A_51_P1480 | 2802.1   | Detected   | 3090.5   | Detected   | 2290.3   | Detected   | 3932.5   | Detected   | Ptgfrn        | 1.403411727 | 0.81735127 | 1.27244782 | 0.7410775 |
| A_55_P2056 | 12429.4  | Detected   | 13994.1  | Detected   | 19224.5  | Detected   | 17442.5  | Detected   | Coq6          | 1.403325985 | 1.54669574 | 1.24641813 | 1.3737575 |
| A_52_P5218 | 49.1     | Detected   | 51.1     | Detected   | 81.8     | Detected   | 68.9     | Detected   | Hddc3         | 1.403258656 | 1.66598778 | 1.34833659 | 1.6007828 |
| A_52_P2484 | 1114     | Detected   | 1133.1   | Detected   | 1460.8   | Detected   | 1563.2   | Detected   | Pten          | 1.403231598 | 1.31131059 | 1.37957815 | 1.2892066 |
| A_55_P2113 | 31.5     | Detected   | 55.5     | Detected   | 30.5     | Detected   | 44.2     | Not Detect | Ago4          | 1.403174603 | 0.96825397 | 0.7963964  | 0.5495495 |
| A_55_P2102 | 2177.1   | Detected   | 2401.5   | Detected   | 2897.3   | Detected   | 3054.6   | Detected   | Nprl3         | 1.403059115 | 1.33080704 | 1.27195503 | 1.2064543 |
| A_52_P4698 | 16677.8  | Detected   | 20480    | Detected   | 14011.4  | Detected   | 23399.1  | Detected   | Rfwd3         | 1.40300879  | 0.8401228  | 1.14253418 | 0.6841504 |
| A_52_P1930 | 2232.5   | Detected   | 2199.3   | Detected   | 2785.3   | Detected   | 3131.9   | Detected   | Hadha         | 1.402866741 | 1.24761478 | 1.42404401 | 1.2664484 |
| A_55_P2178 | 448.4    | Detected   | 394.9    | Detected   | 362.7    | Detected   | 629      | Detected   | Zbtb5         | 1.402765388 | 0.808876   | 1.59280831 | 0.9184604 |

|            |         |          |          |            |          |          |          |            |               |             |            |            |           |
|------------|---------|----------|----------|------------|----------|----------|----------|------------|---------------|-------------|------------|------------|-----------|
| A_51_P3832 | 852.3   | Detected | 1257.5   | Detected   | 816.9    | Detected | 1195.5   | Detected   | Tmem161a      | 1.402675114 | 0.95846533 | 0.95069583 | 0.6496223 |
| A_51_P3659 | 3581.6  | Detected | 4207.1   | Detected   | 5337.6   | Detected | 5023     | Detected   | Trdmt1        | 1.402445834 | 1.49028367 | 1.19393406 | 1.2687124 |
| A_55_P2295 | 186.4   | Detected | 204.8    | Detected   | 219.5    | Detected | 261.4    | Detected   | 3010027C24Rik | 1.402360515 | 1.17757511 | 1.27636719 | 1.0717773 |
| A_52_P6539 | 852.3   | Detected | 1226.2   | Detected   | 1259.4   | Detected | 1194.9   | Detected   | Eny2          | 1.401971137 | 1.47764872 | 0.97447398 | 1.0270755 |
| A_55_P2133 | 472.8   | Detected | 360.2    | Detected   | 739.5    | Detected | 662.8    | Detected   | Ccdc50        | 1.401861252 | 1.56408629 | 1.84008884 | 2.0530261 |
| A_55_P1959 | 78.4    | Detected | 113.2    | Detected   | 98.8     | Detected | 109.9    | Detected   | Atp4b         | 1.401785714 | 1.26020408 | 0.97084806 | 0.8727915 |
| A_52_P6664 | 56.5    | Detected | 73.5     | Detected   | 66.1     | Detected | 79.2     | Detected   | 4930519H02Rik | 1.401769912 | 1.1699115  | 1.07755102 | 0.8993197 |
| A_55_P2313 | 3270.6  | Detected | 3367.6   | Detected   | 2349.2   | Detected | 4583.7   | Detected   | D10Bwg1070e   | 1.401485966 | 0.71827799 | 1.36111771 | 0.6975888 |
| A_66_P1110 | 209.5   | Detected | 230.9    | Detected   | 87.9     | Detected | 293.6    | Detected   | Gata3         | 1.401431981 | 0.41957041 | 1.27154612 | 0.3806843 |
| A_55_P1962 | 16909.7 | Detected | 15043.6  | Detected   | 24017.2  | Detected | 23697.3  | Detected   | Stx5a         | 1.401402745 | 1.42032088 | 1.5752413  | 1.5965062 |
| A_55_P1983 | 175.4   | Detected | 128.4    | Detected   | 121.4    | Detected | 245.8    | Detected   | Cd300ld       | 1.401368301 | 0.69213227 | 1.91433022 | 0.9454829 |
| A_65_P1524 | 1369.6  | Detected | 1447.4   | Detected   | 751.3    | Detected | 1919.1   | Detected   | Nrp2          | 1.401212033 | 0.54855432 | 1.32589471 | 0.5190687 |
| A_55_P1992 | 91869.7 | Detected | 101096.8 | Detected   | 118182.3 | Detected | 128724.3 | Detected   | Vdac2         | 1.401161645 | 1.28641217 | 1.27327769 | 1.1690014 |
| A_52_P4667 | 3655.7  | Detected | 4314.3   | Detected   | 4772.7   | Detected | 5121.9   | Detected   | Fuom          | 1.401072298 | 1.30555024 | 1.18719143 | 1.1062513 |
| A_52_P5234 | 1939.4  | Detected | 2251     | Detected   | 1780.4   | Detected | 2717     | Detected   | Rfx1          | 1.400948747 | 0.91801588 | 1.2070191  | 0.7909374 |
| A_55_P2013 | 194.8   | Detected | 258      | Detected   | 281.6    | Detected | 272.9    | Detected   | Acad8         | 1.400924025 | 1.44558522 | 1.05775194 | 1.0914729 |
| A_51_P4302 | 452.5   | Detected | 258.2    | Detected   | 544.7    | Detected | 633.9    | Detected   | Gpd1l         | 1.400883978 | 1.20375691 | 2.45507359 | 2.109605  |
| A_55_P2142 | 11168.1 | Detected | 9502.6   | Detected   | 11204.3  | Detected | 15645.2  | Detected   | Mink1         | 1.400882872 | 1.00324137 | 1.64641256 | 1.1790773 |
| A_51_P3005 | 46.9    | Detected | 81.1     | Detected   | 59.6     | Detected | 65.7     | Detected   | 2810405F15Rik | 1.400852878 | 1.27078891 | 0.81011097 | 0.7348952 |
| A_66_P1332 | 3841.8  | Detected | 4501.5   | Detected   | 3193.5   | Detected | 5381.6   | Detected   | Ankrd50       | 1.400801708 | 0.83125098 | 1.19551261 | 0.7094302 |
| A_51_P4907 | 27.2    | Detected | 44.7     | Detected   | 23.6     | Detected | 38.1     | Not Detect | Ccdc40        | 1.400735294 | 0.86764706 | 0.85234899 | 0.5279642 |
| A_66_P1026 | 27.7    | Detected | 30.9     | Detected   | 27.9     | Detected | 38.8     | Not Detect | Olf951        | 1.400722022 | 1.00722022 | 1.25566343 | 0.9029126 |
| A_55_P2165 | 102.6   | Detected | 26       | Detected   | 471.4    | Detected | 143.7    | Detected   | Serpina1a     | 1.400584795 | 4.59454191 | 5.52692308 | 18.130769 |
| A_51_P1758 | 31670.3 | Detected | 41710.7  | Detected   | 31751.9  | Detected | 44356.4  | Detected   | Got2          | 1.400567724 | 1.00257655 | 1.06342977 | 0.7612411 |
| A_55_P2262 | 36.2    | Detected | 50.1     | Detected   | 22.7     | Detected | 50.7     | Detected   | Tbck          | 1.400552486 | 0.62707182 | 1.01197605 | 0.4530938 |
| A_55_P2178 | 23856.6 | Detected | 26318.9  | Detected   | 21740.7  | Detected | 33411.8  | Detected   | Rap1gds1      | 1.400526479 | 0.91130756 | 1.26949835 | 0.826049  |
| A_55_P1959 | 1393    | Detected | 1126.2   | Detected   | 1372.6   | Detected | 1950.7   | Detected   | Top3b         | 1.400358938 | 0.98535535 | 1.73210797 | 1.2187888 |
| A_55_P2025 | 13545.2 | Detected | 16046.5  | Detected   | 15979.1  | Detected | 18967.8  | Detected   | Snx3          | 1.400333698 | 1.17968727 | 1.18205216 | 0.9957997 |
| A_55_P1962 | 15984.6 | Detected | 15620.2  | Detected   | 19036.6  | Detected | 22382.9  | Detected   | Mpc1          | 1.400279019 | 1.19093377 | 1.4329458  | 1.2187168 |
| A_55_P2123 | 534.2   | Detected | 667.3    | Detected   | 739      | Detected | 748      | Detected   | Lmbrd1        | 1.400224635 | 1.38337701 | 1.12093511 | 1.1074479 |
| A_55_P1963 | 1973.2  | Detected | 1971.4   | Detected   | 2051.2   | Detected | 2762.7   | Detected   | Yae1d1        | 1.400111494 | 1.0395297  | 1.40138988 | 1.0404788 |
| A_51_P2390 | 5020.8  | Detected | 5174.3   | Detected   | 5054.8   | Detected | 7029.6   | Detected   | Ubn2          | 1.400095602 | 1.00677183 | 1.35856058 | 0.9769051 |
| A_55_P2015 | 23893.4 | Detected | 22981.7  | Detected   | 31625.2  | Detected | 33452.7  | Detected   | Syvn1         | 1.400081194 | 1.32359564 | 1.45562339 | 1.3761036 |
| A_55_P2007 | 68      | Detected | 85.2     | Detected   | 62.5     | Detected | 95.2     | Detected   | Gm20604       | 1.4         | 0.91911765 | 1.11737089 | 0.7335681 |
| A_52_P2060 | 15      | Detected | 14.7     | Not Detect | 30.3     | Detected | 21       | Not Detect | Apitd1        | 1.4         | 2.02       | 1.42857143 | 2.0612245 |
| A_55_P1994 | 4529.9  | Detected | 4917.2   | Detected   | 6610.4   | Detected | 6341.8   | Detected   | Gm16381       | 1.399986755 | 1.45928166 | 1.28971773 | 1.3443423 |
| A_55_P1993 | 4128.6  | Detected | 4274.7   | Detected   | 4300.3   | Detected | 5779.9   | Detected   | Mbd6          | 1.39996609  | 1.04158795 | 1.35211828 | 1.0059887 |
| A_55_P2059 | 5686.2  | Detected | 4144.4   | Detected   | 8091.6   | Detected | 7959.9   | Detected   | Abhd14b       | 1.399862826 | 1.42302416 | 1.9206399  | 1.9524177 |
| A_52_P4527 | 1828.3  | Detected | 1719.4   | Detected   | 1890.8   | Detected | 2559     | Detected   | Pdcd6ip       | 1.399660887 | 1.03418476 | 1.48830988 | 1.0996859 |
| A_66_P1029 | 454.9   | Detected | 436.8    | Detected   | 358.4    | Detected | 636.7    | Detected   | Gm2155        | 1.399648274 | 0.78786546 | 1.45764652 | 0.8205128 |

|            |                  |                  |                   |                   |               |             |            |            |           |
|------------|------------------|------------------|-------------------|-------------------|---------------|-------------|------------|------------|-----------|
| A_55_P2121 | 476.2 Detected   | 514.8 Detected   | 530.9 Detected    | 666.5 Detected    | Tpm2          | 1.399622008 | 1.1148677  | 1.29467754 | 1.0312743 |
| A_55_P2012 | 4344.7 Detected  | 3953.7 Detected  | 2962.1 Detected   | 6080.9 Detected   | Gigyf1        | 1.399613322 | 0.68177319 | 1.53802767 | 0.749197  |
| A_55_P2094 | 35.8 Detected    | 59.1 Detected    | 26.9 Detected     | 50.1 Detected     | Srgn          | 1.399441341 | 0.75139665 | 0.84771574 | 0.4551607 |
| A_55_P2001 | 248.1 Detected   | 230.7 Detected   | 223.6 Detected    | 347.2 Detected    | Cd80          | 1.399435711 | 0.9012495  | 1.50498483 | 0.9692241 |
| A_52_P3953 | 32.3 Detected    | 42.3 Detected    | 45 Detected       | 45.2 Not Detect   | 4930412M03Rik | 1.399380805 | 1.39318885 | 1.06855792 | 1.0638298 |
| A_55_P2273 | 286.2 Detected   | 337.2 Detected   | 435.5 Detected    | 400.5 Detected    | Msh5          | 1.399371069 | 1.52166317 | 1.18772242 | 1.2915184 |
| A_51_P1686 | 31.3 Detected    | 68.7 Detected    | 35.8 Detected     | 43.8 Not Detect   | Klf1          | 1.399361022 | 1.14376997 | 0.63755459 | 0.5211063 |
| A_52_P2235 | 374 Detected     | 545.3 Detected   | 486.4 Detected    | 523.3 Detected    | Dennd6b       | 1.399197861 | 1.30053476 | 0.95965524 | 0.8919861 |
| A_52_P6822 | 77.2 Detected    | 50.4 Detected    | 80.7 Detected     | 108 Detected      | 4933421O10Rik | 1.398963731 | 1.04533679 | 2.14285714 | 1.6011905 |
| A_55_P2247 | 392.1 Detected   | 393.7 Detected   | 395.1 Detected    | 548.5 Detected    | Gm21710       | 1.398877837 | 1.00765111 | 1.39319279 | 1.003556  |
| A_51_P2675 | 1642.7 Detected  | 2208.1 Detected  | 1809.7 Detected   | 2297.7 Detected   | Frg1          | 1.398733792 | 1.1016619  | 1.04057787 | 0.8195734 |
| A_66_P1003 | 8531.5 Detected  | 8013.2 Detected  | 8658.9 Detected   | 11932.4 Detected  | Esyt2         | 1.398628612 | 1.0149329  | 1.489093   | 1.0805795 |
| A_55_P2132 | 71 Detected      | 99 Detected      | 127 Detected      | 99.3 Detected     | Sdcbp         | 1.398591549 | 1.78873239 | 1.0030303  | 1.2828283 |
| A_55_P2077 | 194.7 Detected   | 288.2 Detected   | 170.4 Detected    | 272.3 Detected    | Klra5         | 1.39856189  | 0.8751926  | 0.94482998 | 0.5912561 |
| A_51_P3498 | 266.5 Detected   | 60.6 Detected    | 508.4 Detected    | 372.7 Detected    | Ang2          | 1.398499062 | 1.90769231 | 6.15016502 | 8.3894389 |
| A_52_P2278 | 1487.6 Detected  | 1960 Detected    | 1250.2 Detected   | 2080.2 Detected   | Zfp866        | 1.398359774 | 0.84041409 | 1.06132653 | 0.6378571 |
| A_51_P4783 | 4670.4 Detected  | 6572 Detected    | 6206.5 Detected   | 6530.8 Detected   | Nmd3          | 1.398338472 | 1.32890116 | 0.99373098 | 0.9443853 |
| A_52_P1671 | 222.2 Detected   | 243.8 Detected   | 269 Detected      | 310.7 Detected    | Recql5        | 1.398289829 | 1.21062106 | 1.27440525 | 1.1033634 |
| A_51_P4645 | 4981.1 Detected  | 5350 Detected    | 7344.7 Detected   | 6964.6 Detected   | Psen1         | 1.398205216 | 1.47451366 | 1.30179439 | 1.3728411 |
| A_52_P5856 | 2765.1 Detected  | 2564.8 Detected  | 2359.6 Detected   | 3866.1 Detected   | Fndc3b        | 1.398177281 | 0.85335069 | 1.507369   | 0.9199938 |
| A_55_P2180 | 1223.1 Detected  | 1179 Detected    | 1507.9 Detected   | 1710 Detected     | Lrrc28        | 1.398086829 | 1.23285095 | 1.45038168 | 1.2789652 |
| A_55_P2018 | 334.1 Detected   | 315.5 Detected   | 342.8 Detected    | 467.1 Detected    | Mob3a         | 1.398084406 | 1.02604011 | 1.48050713 | 1.0865293 |
| A_55_P2178 | 465.5 Detected   | 431.8 Detected   | 539.6 Detected    | 650.8 Detected    | Abcc8         | 1.398066595 | 1.15918367 | 1.50717925 | 1.2496526 |
| A_52_P1476 | 1588.2 Detected  | 1899.8 Detected  | 1909.9 Detected   | 2220.4 Detected   | Slc30a7       | 1.398060698 | 1.20255635 | 1.16875461 | 1.0053163 |
| A_55_P2371 | 67.1 Detected    | 129 Detected     | 78.1 Detected     | 93.8 Detected     | LOC100502705  | 1.397913562 | 1.16393443 | 0.72713178 | 0.6054264 |
| A_51_P4398 | 2327.8 Detected  | 3000.6 Detected  | 1831.4 Detected   | 3254 Detected     | Dnajc21       | 1.397886416 | 0.78675144 | 1.08444978 | 0.6103446 |
| A_55_P2147 | 9547.1 Detected  | 10668.1 Detected | 9014.8 Detected   | 13344.6 Detected  | Fam118a       | 1.397764766 | 0.94424485 | 1.25088816 | 0.8450239 |
| A_55_P2084 | 4823 Detected    | 4593.9 Detected  | 5801.5 Detected   | 6741.2 Detected   | Rab5b         | 1.397719262 | 1.20288202 | 1.46742419 | 1.2628703 |
| A_66_P1128 | 13694.9 Detected | 14206 Detected   | 14664.8 Detected  | 19139.8 Detected  | Ubl3          | 1.397585963 | 1.07082198 | 1.34730396 | 1.0322962 |
| A_55_P2027 | 63957 Detected   | 69181.9 Detected | 81548.8 Detected  | 89378 Detected    | Ndufa5        | 1.397470175 | 1.27505668 | 1.29192751 | 1.1787592 |
| A_55_P1984 | 710.2 Detected   | 649 Detected     | 691.7 Detected    | 992.4 Detected    | Vapb          | 1.397352858 | 0.973951   | 1.52912173 | 1.0657935 |
| A_55_P2009 | 4746 Detected    | 4193 Detected    | 5629.2 Detected   | 6631 Detected     | Stxbp3a       | 1.39717657  | 1.18609355 | 1.58144527 | 1.3425233 |
| A_51_P3246 | 3882.6 Detected  | 3043.9 Detected  | 7282.1 Detected   | 5424.6 Detected   | C330018D20Rik | 1.397156545 | 1.87557307 | 1.78212162 | 2.3923585 |
| A_52_P4005 | 1192.8 Detected  | 865.8 Detected   | 1246.5 Detected   | 1666.4 Detected   | Atm           | 1.39704896  | 1.04502012 | 1.92469392 | 1.4397089 |
| A_52_P8490 | 659.9 Detected   | 214.6 Detected   | 691 Detected      | 921.8 Detected    | Slc44a1       | 1.396878315 | 1.04712835 | 4.29543336 | 3.2199441 |
| A_55_P2116 | 92301.7 Detected | 95885.7 Detected | 128321.4 Detected | 128926.1 Detected | Dbi           | 1.396790092 | 1.39023875 | 1.3445811  | 1.3382746 |
| A_55_P2006 | 10763 Detected   | 8636.5 Detected  | 8780.6 Detected   | 15033.2 Detected  | Slc4a2        | 1.396748119 | 0.81581343 | 1.74065883 | 1.016685  |
| A_55_P2244 | 436.3 Detected   | 422.3 Detected   | 570 Detected      | 609.4 Detected    | Taf9b         | 1.396745359 | 1.30644052 | 1.44304996 | 1.3497514 |
| A_55_P2155 | 18.4 Detected    | 22 Detected      | 29.3 Detected     | 25.7 Not Detect   | Syp12         | 1.39673913  | 1.5923913  | 1.16818182 | 1.3318182 |
| A_66_P1079 | 2295.3 Detected  | 3157.7 Detected  | 2568.4 Detected   | 3205.9 Detected   | Prpf38b       | 1.39672374  | 1.11898227 | 1.01526427 | 0.8133768 |



|            |         |            |         |          |         |            |         |            |               |             |            |            |           |
|------------|---------|------------|---------|----------|---------|------------|---------|------------|---------------|-------------|------------|------------|-----------|
| A_55_P2410 | 677.4   | Detected   | 631.8   | Detected | 592.4   | Detected   | 946.1   | Detected   | Iigp1         | 1.396663714 | 0.87452022 | 1.49746755 | 0.9376385 |
| A_55_P2167 | 1041.2  | Detected   | 1494.9  | Detected | 1486.9  | Detected   | 1454.1  | Detected   | Pcsk4         | 1.39656166  | 1.42806377 | 0.9727072  | 0.9946485 |
| A_52_P4245 | 33307.8 | Detected   | 24564.1 | Detected | 37243.1 | Detected   | 46514   | Detected   | Ctnnb1        | 1.396489711 | 1.1181495  | 1.8935764  | 1.5161598 |
| A_52_P2763 | 721     | Detected   | 995.1   | Detected | 870.6   | Detected   | 1006.6  | Detected   | D19Bwg1357e   | 1.396116505 | 1.2074896  | 1.01155663 | 0.8748869 |
| A_66_P1027 | 1397.7  | Detected   | 905     | Detected | 1880.8  | Detected   | 1951.3  | Detected   | Ccdc28b       | 1.396079273 | 1.34563926 | 2.1561326  | 2.078232  |
| A_51_P2503 | 1230.6  | Detected   | 1526.1  | Detected | 1145.4  | Detected   | 1717.9  | Detected   | Prpf39        | 1.395985698 | 0.93076548 | 1.12567984 | 0.7505406 |
| A_52_P5043 | 4339.4  | Detected   | 3353.2  | Detected | 5791.5  | Detected   | 6057.7  | Detected   | Naglu         | 1.395976402 | 1.33463152 | 1.806543   | 1.7271561 |
| A_52_P4230 | 358.7   | Detected   | 346.6   | Detected | 415.6   | Detected   | 500.7   | Detected   | Zfp654        | 1.395873989 | 1.15862838 | 1.44460473 | 1.1990767 |
| A_55_P1991 | 2645.3  | Detected   | 2540.2  | Detected | 3308.2  | Detected   | 3692.3  | Detected   | Tmf1          | 1.395796318 | 1.2505954  | 1.45354696 | 1.3023384 |
| A_55_P1990 | 330     | Detected   | 323.9   | Detected | 377.8   | Detected   | 460.6   | Detected   | Arhgap28      | 1.395757576 | 1.14484848 | 1.42204384 | 1.1664094 |
| A_55_P2033 | 10481.7 | Detected   | 11931.1 | Detected | 15235.7 | Detected   | 14628.9 | Detected   | Cept1         | 1.395661009 | 1.45355238 | 1.22611494 | 1.2769736 |
| A_51_P1412 | 3524.5  | Detected   | 5471.3  | Detected | 2005.4  | Detected   | 4918.9  | Detected   | Sec24d        | 1.395630586 | 0.56898851 | 0.89903679 | 0.3665308 |
| A_55_P1964 | 5427.9  | Detected   | 7978.7  | Detected | 4805.8  | Detected   | 7573.7  | Detected   | Smarca5-ps    | 1.395327843 | 0.88538846 | 0.94923985 | 0.6023287 |
| A_55_P2101 | 43851.1 | Detected   | 41155.4 | Detected | 52284.1 | Detected   | 61185.6 | Detected   | Tomm7         | 1.395303653 | 1.19230989 | 1.48669676 | 1.2704068 |
| A_55_P2002 | 3048.2  | Detected   | 3631.9  | Detected | 2642.9  | Detected   | 4253    | Detected   | Zfp747        | 1.395249656 | 0.86703628 | 1.17101242 | 0.7276907 |
| A_55_P2074 | 7313.4  | Detected   | 10482.7 | Detected | 9909    | Detected   | 10203.3 | Detected   | Snap47        | 1.395151366 | 1.35491016 | 0.97334656 | 0.9452717 |
| A_55_P1989 | 854.5   | Detected   | 1003.7  | Detected | 1261.5  | Detected   | 1192.1  | Detected   | Lin52         | 1.395084845 | 1.47630193 | 1.18770549 | 1.2568497 |
| A_52_P3758 | 15.7    | Detected   | 22      | Detected | 11.5    | Not Detect | 21.9    | Not Detect | Catsperg2     | 1.394904459 | 0.73248408 | 0.99545455 | 0.5227273 |
| A_55_P2240 | 510.6   | Detected   | 528.1   | Detected | 560.3   | Detected   | 712.2   | Detected   | 1110008J03Rik | 1.394829612 | 1.09733647 | 1.34860822 | 1.0609733 |
| A_55_P1955 | 831.5   | Detected   | 1026.3  | Detected | 770.2   | Detected   | 1159.8  | Detected   | Rgma          | 1.394828623 | 0.92627781 | 1.13007892 | 0.7504628 |
| A_55_P2138 | 22.8    | Detected   | 26.3    | Detected | 40.1    | Detected   | 31.8    | Not Detect | Tpk1          | 1.394736842 | 1.75877193 | 1.20912548 | 1.5247148 |
| A_55_P2295 | 462.2   | Detected   | 438.1   | Detected | 479.4   | Detected   | 644.6   | Detected   | D9Erd720e     | 1.394634357 | 1.03721333 | 1.47135357 | 1.0942707 |
| A_51_P1701 | 149.3   | Detected   | 152.7   | Detected | 154.1   | Detected   | 208.2   | Detected   | Alx4          | 1.394507703 | 1.03215003 | 1.36345776 | 1.0091683 |
| A_55_P2014 | 191.9   | Detected   | 214.6   | Detected | 170.3   | Detected   | 267.6   | Detected   | BC068281      | 1.39447629  | 0.88744138 | 1.24697111 | 0.7935694 |
| A_55_P1990 | 18      | Detected   | 16.3    | Detected | 19      | Detected   | 25.1    | Not Detect | Masp2         | 1.394444444 | 1.05555556 | 1.5398773  | 1.1656442 |
| A_52_P7709 | 158.2   | Detected   | 125.9   | Detected | 130.4   | Detected   | 220.6   | Detected   | 1600014C10Rik | 1.394437421 | 0.82427307 | 1.75218427 | 1.0357427 |
| A_66_P1207 | 82.4    | Detected   | 89.5    | Detected | 81.9    | Detected   | 114.9   | Detected   | Gpr45         | 1.394417476 | 0.99393204 | 1.28379888 | 0.9150838 |
| A_55_P2223 | 74.8    | Detected   | 63.9    | Detected | 82.2    | Detected   | 104.3   | Detected   | B130019D13Rik | 1.394385027 | 1.09893048 | 1.63223787 | 1.286385  |
| A_55_P1997 | 21.3    | Detected   | 15.7    | Detected | 19.4    | Detected   | 29.7    | Not Detect | Nupr11        | 1.394366197 | 0.91079812 | 1.89171975 | 1.2356688 |
| A_55_P2058 | 26183.2 | Detected   | 27124.4 | Detected | 21339   | Detected   | 36508.6 | Detected   | Cmip          | 1.394352104 | 0.81498824 | 1.34596894 | 0.7867086 |
| A_55_P1985 | 1732.4  | Detected   | 5123.5  | Detected | 1906.3  | Detected   | 2415.4  | Detected   | Tiparp        | 1.39425075  | 1.10038097 | 0.47143554 | 0.3720699 |
| A_55_P2030 | 12721   | Detected   | 12849.7 | Detected | 15123.7 | Detected   | 17735.8 | Detected   | Rp9           | 1.394214291 | 1.18887666 | 1.38025012 | 1.1769691 |
| A_52_P1162 | 27.4    | Detected   | 22.3    | Detected | 14.4    | Not Detect | 38.2    | Not Detect | Adhfe1        | 1.394160584 | 0.52554745 | 1.71300448 | 0.6457399 |
| A_52_P3815 | 6.6     | Not Detect | 24.2    | Detected | 3.7     | Not Detect | 9.2     | Not Detect | Btbd17        | 1.393939394 | 0.56060606 | 0.03691814 | 0.0148475 |
| A_52_P1984 | 394.5   | Detected   | 480.7   | Detected | 501.9   | Detected   | 549.9   | Detected   | Pcgf5         | 1.39391635  | 1.27224335 | 1.14395673 | 1.0441024 |
| A_55_P2052 | 6449    | Detected   | 6848.6  | Detected | 6604.5  | Detected   | 8988.5  | Detected   | Ccdc82        | 1.393781982 | 1.02411227 | 1.31245802 | 0.9643577 |
| A_52_P3025 | 1201.1  | Detected   | 1227    | Detected | 1223.5  | Detected   | 1673.7  | Detected   | Chn2          | 1.39347265  | 1.01864957 | 1.36405868 | 0.9971475 |
| A_55_P2003 | 1194.8  | Detected   | 1111.4  | Detected | 1066.3  | Detected   | 1664.9  | Detected   | Fam107a       | 1.393454972 | 0.89245062 | 1.49802051 | 0.9594206 |
| A_51_P5107 | 1140.7  | Detected   | 1119.5  | Detected | 1540.6  | Detected   | 1589.4  | Detected   | 1110008J03Rik | 1.393354957 | 1.35057421 | 1.41974096 | 1.3761501 |
| A_55_P1983 | 23.9    | Detected   | 25.7    | Detected | 31.3    | Detected   | 33.3    | Not Detect | Adam39        | 1.393305439 | 1.30962343 | 1.29571984 | 1.2178988 |

|            |          |            |          |            |          |            |          |            |               |             |            |            |           |
|------------|----------|------------|----------|------------|----------|------------|----------|------------|---------------|-------------|------------|------------|-----------|
| A_55_P2053 | 2861     | Detected   | 3284.7   | Detected   | 2411.6   | Detected   | 3986.1   | Detected   | Itsn2         | 1.393254107 | 0.84292206 | 1.21353548 | 0.7341919 |
| A_55_P1965 | 47.3     | Detected   | 59.9     | Detected   | 94.1     | Detected   | 65.9     | Detected   | Atp2a3        | 1.393234672 | 1.98942918 | 1.10016694 | 1.5709516 |
| A_52_P2012 | 37872.2  | Detected   | 30571    | Detected   | 45225.9  | Detected   | 52756.3  | Detected   | Scrn1         | 1.393008592 | 1.19417145 | 1.72569756 | 1.4793726 |
| A_55_P2085 | 6155.1   | Detected   | 5358.3   | Detected   | 7977.4   | Detected   | 8574.1   | Detected   | Fam103a1      | 1.393007425 | 1.29606343 | 1.60015303 | 1.4887931 |
| A_51_P3140 | 21260.5  | Detected   | 24542.8  | Detected   | 34004.8  | Detected   | 29614.4  | Detected   | Banf1         | 1.392930552 | 1.59943557 | 1.20664309 | 1.3855306 |
| A_55_P2037 | 198.3    | Detected   | 128.1    | Detected   | 194.6    | Detected   | 276.2    | Detected   | Tmem106a      | 1.392839133 | 0.9813414  | 2.15612802 | 1.5191257 |
| A_55_P2059 | 43235.2  | Detected   | 57610.6  | Detected   | 53890.3  | Detected   | 60215.8  | Detected   | Gm13315       | 1.392749426 | 1.24644503 | 1.04522084 | 0.9354233 |
| A_52_P6834 | 5147.6   | Detected   | 3815.2   | Detected   | 5189.3   | Detected   | 7168.8   | Detected   | Capn5         | 1.392649001 | 1.00810086 | 1.87901027 | 1.3601646 |
| A_55_P2123 | 986.4    | Detected   | 1285.1   | Detected   | 920.2    | Detected   | 1373.7   | Detected   | Dnal4         | 1.392639903 | 0.93288727 | 1.06894405 | 0.7160532 |
| A_55_P2409 | 127596.7 | Detected   | 148110.8 | Detected   | 118466.1 | Detected   | 177688.8 | Detected   | Luc7l2        | 1.39258147  | 0.92844172 | 1.19970184 | 0.7998478 |
| A_55_P2113 | 678.4    | Detected   | 716.9    | Detected   | 683.2    | Detected   | 944.7    | Detected   | Miip          | 1.392541274 | 1.00707547 | 1.31775701 | 0.952992  |
| A_55_P2065 | 56.3     | Detected   | 59       | Detected   | 81.9     | Detected   | 78.4     | Detected   | 2310067B10Rik | 1.392539964 | 1.45470693 | 1.32881356 | 1.3881356 |
| A_52_P2140 | 137.4    | Detected   | 137.1    | Detected   | 159.6    | Detected   | 191.3    | Detected   | Lmbr1         | 1.392285298 | 1.16157205 | 1.39533187 | 1.1641138 |
| A_51_P3984 | 1127.5   | Detected   | 1113.1   | Detected   | 1099.1   | Detected   | 1569.8   | Detected   | Bsdc1         | 1.392283814 | 0.97481153 | 1.41029557 | 0.9874225 |
| A_51_P3365 | 437.7    | Detected   | 1009.5   | Detected   | 90.6     | Detected   | 609.4    | Detected   | Zfpm2         | 1.392277816 | 0.20699109 | 0.60366518 | 0.0897474 |
| A_51_P1420 | 2815.6   | Detected   | 2242.6   | Detected   | 3337.7   | Detected   | 3919.8   | Detected   | Oxld1         | 1.392172184 | 1.18543117 | 1.74788192 | 1.4883171 |
| A_55_P2010 | 81.1     | Detected   | 85.4     | Detected   | 121      | Detected   | 112.9    | Detected   | Tspan32       | 1.392108508 | 1.4919852  | 1.32201405 | 1.4168618 |
| A_66_P1214 | 14238.1  | Detected   | 11865.3  | Detected   | 20732.7  | Detected   | 19820.9  | Detected   | Chmp6         | 1.392102879 | 1.45614232 | 1.67049295 | 1.7473389 |
| A_51_P1477 | 27.8     | Detected   | 57.3     | Detected   | 25       | Detected   | 38.7     | Not Detect | Cpne9         | 1.392086331 | 0.89928058 | 0.67539267 | 0.4363002 |
| A_55_P1953 | 100.5    | Detected   | 95.6     | Detected   | 105      | Detected   | 139.9    | Detected   | Lhb           | 1.392039801 | 1.04477612 | 1.46338912 | 1.0983264 |
| A_55_P2173 | 130680.8 | Detected   | 151896.2 | Detected   | 117490.6 | Detected   | 181867.3 | Detected   | Rrm2          | 1.391691052 | 0.89906551 | 1.19731303 | 0.7734927 |
| A_55_P1973 | 60.8     | Detected   | 102.6    | Detected   | 41.6     | Detected   | 84.6     | Detected   | Gm2240        | 1.391447368 | 0.68421053 | 0.8245614  | 0.4054581 |
| A_55_P2131 | 7147     | Detected   | 9122.5   | Detected   | 8619.8   | Detected   | 9943     | Detected   | Churc1        | 1.391213096 | 1.20607248 | 1.08994245 | 0.9448945 |
| A_55_P2146 | 7258     | Detected   | 8155.5   | Detected   | 6623.9   | Detected   | 10096.6  | Detected   | Cnr2          | 1.391099476 | 0.91263433 | 1.23801116 | 0.8122004 |
| A_52_P5213 | 15.6     | Detected   | 18.1     | Not Detect | 15.4     | Not Detect | 21.7     | Not Detect | A930024E05Rik | 1.391025641 | 0.98717949 | 1.19889503 | 0.8508287 |
| A_52_P2299 | 13.3     | Not Detect | 23.8     | Detected   | 15       | Not Detect | 18.5     | Not Detect | Slc22a1       | 1.390977444 | 1.12781955 | 0.77731092 | 0.6302521 |
| A_55_P2118 | 45.8     | Detected   | 43.9     | Detected   | 54.9     | Detected   | 63.7     | Detected   | Leng8         | 1.390829694 | 1.19868996 | 1.45102506 | 1.2505695 |
| A_51_P2325 | 93.4     | Detected   | 85.4     | Detected   | 112.8    | Detected   | 129.9    | Detected   | Nphp3         | 1.390792291 | 1.20770878 | 1.52107728 | 1.3208431 |
| A_55_P2055 | 11931    | Detected   | 10785.8  | Detected   | 13712.6  | Detected   | 16593.3  | Detected   | Snapin        | 1.390771939 | 1.14932529 | 1.53843943 | 1.2713568 |
| A_55_P2144 | 11968.4  | Detected   | 10833.3  | Detected   | 12516.2  | Detected   | 16644.7  | Detected   | Mink1         | 1.390720564 | 1.04577053 | 1.53643857 | 1.1553451 |
| A_55_P2044 | 73.2     | Detected   | 104.6    | Detected   | 100.3    | Detected   | 101.8    | Detected   | Gm14025       | 1.390710383 | 1.37021858 | 0.97323136 | 0.958891  |
| A_51_P2981 | 1227.4   | Detected   | 876.9    | Detected   | 1232.8   | Detected   | 1706.9   | Detected   | Sbf2          | 1.39066319  | 1.00439954 | 1.94651614 | 1.4058616 |
| A_51_P2431 | 3102     | Detected   | 2837.4   | Detected   | 3531.9   | Detected   | 4313.8   | Detected   | Adcy6         | 1.390651193 | 1.13858801 | 1.52033552 | 1.2447663 |
| A_55_P2128 | 913.5    | Detected   | 832.1    | Detected   | 1093.4   | Detected   | 1270.2   | Detected   | LOC101056555  | 1.39047619  | 1.19693487 | 1.52649922 | 1.3140248 |
| A_51_P2821 | 1408.1   | Detected   | 1277.1   | Detected   | 1117.1   | Detected   | 1957.9   | Detected   | Mtor          | 1.390455223 | 0.79333854 | 1.53308277 | 0.8747162 |
| A_55_P2349 | 649.7    | Detected   | 508      | Detected   | 645.8    | Detected   | 903.2    | Detected   | D330022H12Rik | 1.390180083 | 0.99399723 | 1.77795276 | 1.2712598 |
| A_55_P2009 | 142      | Detected   | 107.6    | Detected   | 460.6    | Detected   | 197.4    | Detected   | Gm608         | 1.390140845 | 3.24366197 | 1.83457249 | 4.2806691 |
| A_55_P2212 | 81.3     | Detected   | 93.9     | Detected   | 53.8     | Detected   | 113      | Detected   | Pon2          | 1.389913899 | 0.66174662 | 1.20340788 | 0.5729499 |
| A_55_P2090 | 16087.8  | Detected   | 21509.5  | Detected   | 18794.4  | Detected   | 22360.4  | Detected   | Larp4         | 1.389897935 | 1.16823929 | 1.03955926 | 0.8737721 |
| A_55_P2141 | 14578.8  | Detected   | 17968.5  | Detected   | 16993.9  | Detected   | 20259.1  | Detected   | Ldha          | 1.389627404 | 1.16565835 | 1.12747864 | 0.9457606 |

|            |          |            |          |            |          |            |          |            |               |             |            |            |           |
|------------|----------|------------|----------|------------|----------|------------|----------|------------|---------------|-------------|------------|------------|-----------|
| A_51_P4935 | 13456.3  | Detected   | 13295.8  | Detected   | 15723.4  | Detected   | 18696.8  | Detected   | Rnpep         | 1.389445836 | 1.16847871 | 1.40621851 | 1.182584  |
| A_51_P4188 | 18.5     | Detected   | 12.4     | Not Detect | 17.9     | Detected   | 25.7     | Not Detect | Tfap2c        | 1.389189189 | 0.96756757 | 2.07258065 | 1.4435484 |
| A_51_P4755 | 2091.9   | Detected   | 2688.6   | Detected   | 1411.4   | Detected   | 2906     | Detected   | Ugp2          | 1.389167742 | 0.67469764 | 1.08085993 | 0.5249572 |
| A_55_P2086 | 652.5    | Detected   | 629.5    | Detected   | 649.7    | Detected   | 906.4    | Detected   | Cntf          | 1.389118774 | 0.99570881 | 1.43987292 | 1.032089  |
| A_55_P1967 | 71861.8  | Detected   | 88465.6  | Detected   | 70208.2  | Detected   | 99813.2  | Detected   | Gm8526        | 1.388960477 | 0.97698917 | 1.12827133 | 0.7936215 |
| A_52_P2467 | 13095.5  | Detected   | 15622.5  | Detected   | 16250.8  | Detected   | 18187    | Detected   | Ghitm         | 1.388797679 | 1.24094536 | 1.16415426 | 1.0402176 |
| A_55_P1989 | 547.1    | Detected   | 575.9    | Detected   | 221.4    | Detected   | 759.8    | Detected   | Galnt11       | 1.388777189 | 0.40467922 | 1.31932627 | 0.3844417 |
| A_52_P1207 | 634.3    | Detected   | 566.9    | Detected   | 684.5    | Detected   | 880.9    | Detected   | 0610030E20Rik | 1.388775028 | 1.07914236 | 1.55388957 | 1.207444  |
| A_51_P3133 | 3736     | Detected   | 2570.6   | Detected   | 6796     | Detected   | 5188.3   | Detected   | 2700089E24Rik | 1.388731263 | 1.81905782 | 2.01832257 | 2.6437408 |
| A_51_P1654 | 117435.2 | Detected   | 147165.7 | Detected   | 129841.9 | Detected   | 163082.1 | Detected   | Cox4i1        | 1.388698618 | 1.1056472  | 1.10815292 | 0.8822837 |
| A_51_P1832 | 26.5     | Detected   | 35.8     | Detected   | 37.4     | Detected   | 36.8     | Not Detect | Riia1         | 1.388679245 | 1.41132075 | 1.02793296 | 1.0446927 |
| A_52_P4764 | 1666     | Detected   | 1070     | Detected   | 848      | Detected   | 2313.5   | Detected   | Evc           | 1.388655462 | 0.5090036  | 2.16214953 | 0.7925234 |
| A_55_P2004 | 8823.7   | Detected   | 8088.7   | Detected   | 8280.5   | Detected   | 12253    | Detected   | Tacc2         | 1.388646486 | 0.93843852 | 1.51482933 | 1.0237121 |
| A_55_P1953 | 3125.2   | Detected   | 3144.7   | Detected   | 2797.9   | Detected   | 4339.5   | Detected   | Triobp        | 1.388551133 | 0.8952707  | 1.37994085 | 0.8897192 |
| A_55_P2038 | 22010.8  | Detected   | 25415.9  | Detected   | 33513.5  | Detected   | 30562.1  | Detected   | Tmco1         | 1.388504734 | 1.52259345 | 1.20247955 | 1.3186037 |
| A_55_P2048 | 2285.8   | Detected   | 3895.4   | Detected   | 1992.1   | Detected   | 3173.6   | Detected   | Fam84b        | 1.388397935 | 0.87151107 | 0.81470452 | 0.5113981 |
| A_52_P4384 | 749      | Detected   | 888      | Detected   | 756.8    | Detected   | 1039.9   | Detected   | Sco1          | 1.388384513 | 1.01041389 | 1.17105856 | 0.8522523 |
| A_66_P1226 | 43       | Detected   | 49.4     | Detected   | 28       | Detected   | 59.7     | Detected   | Mrgpra4       | 1.388372093 | 0.65116279 | 1.20850202 | 0.5668016 |
| A_55_P2270 | 3469.7   | Detected   | 2311.3   | Detected   | 1968     | Detected   | 4817.2   | Detected   | C230096K16Rik | 1.388362106 | 0.56719601 | 2.08419504 | 0.8514689 |
| A_52_P6859 | 3064.1   | Detected   | 3259.3   | Detected   | 2525.3   | Detected   | 4253.9   | Detected   | Efcab14       | 1.388303254 | 0.82415718 | 1.30515755 | 0.7747983 |
| A_51_P1807 | 4240.9   | Detected   | 3978.9   | Detected   | 5813.8   | Detected   | 5887.3   | Detected   | Mlh1          | 1.388219482 | 1.37088825 | 1.47963005 | 1.4611576 |
| A_51_P1795 | 425.4    | Detected   | 78.8     | Detected   | 684.4    | Detected   | 590.5    | Detected   | Ang3          | 1.388105313 | 1.60883874 | 7.49365482 | 8.6852792 |
| A_52_P1316 | 5349.8   | Detected   | 5415.2   | Detected   | 6796.8   | Detected   | 7424.4   | Detected   | Rbm7          | 1.387790198 | 1.2704774  | 1.37102969 | 1.2551337 |
| A_55_P2086 | 6693.5   | Detected   | 8200.8   | Detected   | 8689.4   | Detected   | 9288.6   | Detected   | Bcdin3d       | 1.387704489 | 1.29818481 | 1.1326456  | 1.0595796 |
| A_55_P2079 | 580.1    | Detected   | 544.4    | Detected   | 614.4    | Detected   | 804.9    | Detected   | Dnm1          | 1.387519393 | 1.05912774 | 1.47850845 | 1.1285819 |
| A_51_P3444 | 99.1     | Detected   | 104.5    | Detected   | 94.3     | Detected   | 137.5    | Detected   | Zfp748        | 1.387487386 | 0.95156408 | 1.31578947 | 0.9023923 |
| A_52_P5606 | 1113.9   | Detected   | 751.5    | Detected   | 1320.6   | Detected   | 1545.5   | Detected   | 1300002E11Rik | 1.387467457 | 1.18556423 | 2.05655356 | 1.7572854 |
| A_55_P2029 | 200.8    | Detected   | 204.3    | Detected   | 128.9    | Detected   | 278.6    | Detected   | Ppp1r3f       | 1.387450199 | 0.64193227 | 1.36368086 | 0.6309349 |
| A_55_P2129 | 104.8    | Detected   | 85       | Detected   | 81.8     | Detected   | 145.4    | Detected   | Prrt1         | 1.38740458  | 0.78053435 | 1.71058824 | 0.9623529 |
| A_51_P2481 | 1463.6   | Detected   | 1099.6   | Detected   | 2146.1   | Detected   | 2030.6   | Detected   | Bbc3          | 1.387400929 | 1.46631593 | 1.84667152 | 1.9517097 |
| A_52_P9735 | 11.1     | Not Detect | 30.1     | Detected   | 11       | Not Detect | 15.4     | Not Detect | Hoxb9         | 1.387387387 | 0.99099099 | 0.51162791 | 0.3654485 |
| A_55_P2042 | 38       | Detected   | 35.5     | Detected   | 37.4     | Detected   | 52.7     | Not Detect | Sorcs2        | 1.386842105 | 0.98421053 | 1.48450704 | 1.0535211 |
| A_51_P1220 | 7052.1   | Detected   | 6558.1   | Detected   | 6648.4   | Detected   | 9780     | Detected   | Usp20         | 1.386820947 | 0.94275464 | 1.49128559 | 1.0137692 |
| A_55_P2202 | 571.7    | Detected   | 455.1    | Detected   | 494.3    | Detected   | 792.8    | Detected   | C430045I18Rik | 1.386741298 | 0.86461431 | 1.74203472 | 1.0861349 |
| A_55_P2001 | 596.1    | Detected   | 704.8    | Detected   | 384.4    | Detected   | 826.6    | Detected   | Klhl8         | 1.386680087 | 0.64485825 | 1.17281498 | 0.545403  |
| A_52_P3465 | 18554.5  | Detected   | 20356.2  | Detected   | 18741.4  | Detected   | 25728.4  | Detected   | Glt25d1       | 1.38663936  | 1.01007303 | 1.26390977 | 0.9206728 |
| A_55_P1981 | 477.8    | Detected   | 521.1    | Detected   | 439.5    | Detected   | 662.5    | Detected   | Sdccag8       | 1.386563416 | 0.91984094 | 1.27134907 | 0.8434082 |
| A_55_P1985 | 138.4    | Detected   | 174.4    | Detected   | 126.2    | Detected   | 191.9    | Detected   | Pogz          | 1.386560694 | 0.91184971 | 1.10034404 | 0.7236239 |
| A_55_P1966 | 28.2     | Detected   | 56.4     | Detected   | 69.2     | Detected   | 39.1     | Not Detect | Prss32        | 1.386524823 | 2.45390071 | 0.69326241 | 1.2269504 |
| A_66_P1209 | 266.3    | Detected   | 294.2    | Detected   | 303.6    | Detected   | 369.2    | Detected   | Rad51d        | 1.386406309 | 1.14006759 | 1.25492862 | 1.0319511 |

|            |         |            |         |            |         |            |         |            |               |             |            |            |           |
|------------|---------|------------|---------|------------|---------|------------|---------|------------|---------------|-------------|------------|------------|-----------|
| A_55_P1958 | 3557.1  | Detected   | 2157.6  | Detected   | 3707.3  | Detected   | 4931.5  | Detected   | Hr            | 1.386382165 | 1.04222541 | 2.28564145 | 1.7182518 |
| A_55_P2087 | 1890.9  | Detected   | 2280.4  | Detected   | 2959.3  | Detected   | 2621.4  | Detected   | Mipep         | 1.386323973 | 1.56502195 | 1.14953517 | 1.2977109 |
| A_55_P2321 | 53.6    | Detected   | 43      | Detected   | 39.2    | Detected   | 74.3    | Detected   | D230040A04Rik | 1.38619403  | 0.73134328 | 1.72790698 | 0.9116279 |
| A_55_P2177 | 216.8   | Detected   | 210.1   | Detected   | 215.2   | Detected   | 300.5   | Detected   | Tmem29        | 1.386070111 | 0.99261993 | 1.4302713  | 1.0242742 |
| A_51_P5128 | 2322.7  | Detected   | 2623.7  | Detected   | 3388.9  | Detected   | 3218.8  | Detected   | Dera          | 1.385801007 | 1.45903474 | 1.22681709 | 1.2916492 |
| A_55_P1966 | 285.2   | Detected   | 416.9   | Detected   | 250.2   | Detected   | 395.2   | Detected   | Fam84b        | 1.38569425  | 0.8772791  | 0.94794915 | 0.6001439 |
| A_55_P2039 | 157.2   | Detected   | 179.5   | Detected   | 163.3   | Detected   | 217.8   | Detected   | Gm4858        | 1.385496183 | 1.03880407 | 1.21337047 | 0.9097493 |
| A_55_P2071 | 875     | Detected   | 828.9   | Detected   | 1264.7  | Detected   | 1212.2  | Detected   | Eml2          | 1.385371429 | 1.44537143 | 1.46242007 | 1.525757  |
| A_51_P1164 | 16910.5 | Detected   | 10496.6 | Detected   | 24493   | Detected   | 23426.3 | Detected   | Abcc5         | 1.385310902 | 1.44839005 | 2.23179887 | 2.3334223 |
| A_52_P1309 | 23.1    | Detected   | 18      | Not Detect | 39.8    | Detected   | 32      | Not Detect | ExpH5         | 1.385281385 | 1.72294372 | 1.77777778 | 2.2111111 |
| A_55_P2014 | 586.2   | Detected   | 464     | Detected   | 497.9   | Detected   | 811.9   | Detected   | Taok3         | 1.385022177 | 0.84936882 | 1.74978448 | 1.0730603 |
| A_55_P2074 | 4513.1  | Detected   | 4361.2  | Detected   | 5140.6  | Detected   | 6250.5  | Detected   | Gtf2h1        | 1.384968204 | 1.13903968 | 1.43320646 | 1.1787123 |
| A_55_P2043 | 483.7   | Detected   | 498.1   | Detected   | 419.8   | Detected   | 669.9   | Detected   | Mtm1          | 1.384949349 | 0.86789332 | 1.34491066 | 0.8428027 |
| A_55_P2071 | 27.8    | Detected   | 30.9    | Detected   | 20.7    | Detected   | 38.5    | Not Detect | Pde3a         | 1.384892086 | 0.74460432 | 1.24595469 | 0.6699029 |
| A_55_P2255 | 342.6   | Detected   | 391.4   | Detected   | 182     | Detected   | 474.4   | Detected   | F630048H11Rik | 1.384705196 | 0.53123176 | 1.21205927 | 0.4649974 |
| A_51_P4668 | 2184.8  | Detected   | 3215.1  | Detected   | 1357.1  | Detected   | 3025.1  | Detected   | Scoc          | 1.384611864 | 0.62115525 | 0.94090386 | 0.422102  |
| A_66_P1065 | 37.2    | Detected   | 39.2    | Detected   | 32.5    | Detected   | 51.5    | Detected   | Pot1a         | 1.384408602 | 0.87365591 | 1.31377551 | 0.8290816 |
| A_55_P2084 | 1771.1  | Detected   | 1448.4  | Detected   | 2121.4  | Detected   | 2451.9  | Detected   | AW146154      | 1.38439388  | 1.19778669 | 1.69283347 | 1.4646506 |
| A_52_P9381 | 129.6   | Detected   | 217     | Detected   | 117.4   | Detected   | 179.4   | Detected   | Nacc1         | 1.384259259 | 0.9058642  | 0.82672811 | 0.5410138 |
| A_55_P2166 | 9453.9  | Detected   | 9510    | Detected   | 11594.1 | Detected   | 13086.3 | Detected   | Timm10b       | 1.384222384 | 1.22638276 | 1.37605678 | 1.2191483 |
| A_55_P1970 | 18320.5 | Detected   | 18832.9 | Detected   | 19367.4 | Detected   | 25359.3 | Detected   | Scp2          | 1.384203488 | 1.05714364 | 1.34654249 | 1.0283812 |
| A_52_P1191 | 21229.2 | Detected   | 22970.3 | Detected   | 32271.8 | Detected   | 29385.2 | Detected   | Tmem258       | 1.384187817 | 1.52016091 | 1.27926932 | 1.4049359 |
| A_55_P2321 | 16.4    | Detected   | 17.7    | Detected   | 13.8    | Not Detect | 22.7    | Not Detect | C130030J05    | 1.384146341 | 0.84146341 | 1.28248588 | 0.779661  |
| A_55_P1982 | 5720.4  | Detected   | 6607    | Detected   | 7873.1  | Detected   | 7917.3  | Detected   | Kdm3a         | 1.38404657  | 1.37631984 | 1.19831996 | 1.1916301 |
| A_51_P4191 | 12.5    | Not Detect | 148.7   | Detected   | 18.1    | Detected   | 17.3    | Not Detect | Rab15         | 1.384       | 1.448      | 0.11634163 | 0.1217216 |
| A_51_P4752 | 1093.1  | Detected   | 948.2   | Detected   | 900.6   | Detected   | 1512.8  | Detected   | Zfp110        | 1.383953893 | 0.82389534 | 1.595444   | 0.9497996 |
| A_66_P1289 | 654.8   | Detected   | 431.3   | Detected   | 980.9   | Detected   | 906.2   | Detected   | Hacl1         | 1.383934026 | 1.49801466 | 2.10108973 | 2.274287  |
| A_55_P1981 | 1895.5  | Detected   | 1881.2  | Detected   | 2569.7  | Detected   | 2623.2  | Detected   | Ccdc101       | 1.383909259 | 1.35568452 | 1.39442909 | 1.3659898 |
| A_66_P1002 | 53.4    | Detected   | 117.9   | Detected   | 95.2    | Detected   | 73.9    | Detected   | Hcn3          | 1.383895131 | 1.78277154 | 0.62680237 | 0.807464  |
| A_66_P1332 | 59.2    | Detected   | 46.2    | Detected   | 48.9    | Detected   | 81.9    | Detected   | Ppip5k1       | 1.383445946 | 0.82601351 | 1.77272727 | 1.0584416 |
| A_55_P2045 | 19.3    | Detected   | 18.2    | Detected   | 16.2    | Detected   | 26.7    | Not Detect | Olfir279      | 1.383419689 | 0.83937824 | 1.46703297 | 0.8901099 |
| A_51_P1225 | 4142.9  | Detected   | 3801.2  | Detected   | 2971.7  | Detected   | 5730.6  | Detected   | Daglb         | 1.383233967 | 0.71729948 | 1.50757655 | 0.7817794 |
| A_51_P1594 | 24854   | Detected   | 30815.5 | Detected   | 37897.2 | Detected   | 34377.7 | Detected   | Gcat          | 1.383185805 | 1.52479279 | 1.11559767 | 1.2298097 |
| A_51_P2953 | 22071   | Detected   | 20509   | Detected   | 22036.7 | Detected   | 30525.9 | Detected   | Gabarap       | 1.383077341 | 0.99844592 | 1.48841484 | 1.0744892 |
| A_55_P2095 | 5115.8  | Detected   | 7859.1  | Detected   | 6941.9  | Detected   | 7075    | Detected   | Mat2a         | 1.382970405 | 1.35695297 | 0.90023031 | 0.8832945 |
| A_51_P4647 | 16385   | Detected   | 19490.8 | Detected   | 14797.7 | Detected   | 22658.1 | Detected   | Slc2a1        | 1.382856271 | 0.90312481 | 1.16250231 | 0.7592146 |
| A_52_P4914 | 38.4    | Detected   | 49.6    | Detected   | 43.1    | Detected   | 53.1    | Detected   | Rps15a        | 1.3828125   | 1.12239583 | 1.07056452 | 0.8689516 |
| A_55_P2162 | 33.7    | Detected   | 26.8    | Detected   | 44.9    | Detected   | 46.6    | Detected   | Asic3         | 1.382789318 | 1.33234421 | 1.73880597 | 1.6753731 |
| A_66_P1135 | 2580.1  | Detected   | 2664    | Detected   | 2011.5  | Detected   | 3567.5  | Detected   | Fgd4          | 1.382698345 | 0.77962094 | 1.33915165 | 0.7550676 |
| A_66_P1236 | 170.9   | Detected   | 160.5   | Detected   | 154.3   | Detected   | 236.3   | Detected   | Csf2rb        | 1.38267993  | 0.90286717 | 1.47227414 | 0.9613707 |

|            |         |            |         |            |         |            |         |            |               |             |            |            |           |
|------------|---------|------------|---------|------------|---------|------------|---------|------------|---------------|-------------|------------|------------|-----------|
| A_52_P5302 | 7009.7  | Detected   | 6854    | Detected   | 8578.9  | Detected   | 9690.2  | Detected   | Nsa2          | 1.382398676 | 1.22386122 | 1.41380216 | 1.2516633 |
| A_51_P4386 | 35482.2 | Detected   | 41211.8 | Detected   | 48328.1 | Detected   | 49047.4 | Detected   | Vti1b         | 1.382310003 | 1.36203787 | 1.19013001 | 1.1726763 |
| A_55_P1964 | 1939.5  | Detected   | 1802.9  | Detected   | 1716    | Detected   | 2680.8  | Detected   | Lcn12         | 1.38221191  | 0.88476411 | 1.48693771 | 0.9517999 |
| A_55_P2007 | 14118.4 | Detected   | 13630.7 | Detected   | 19686.6 | Detected   | 19514.2 | Detected   | Fam189b       | 1.382182117 | 1.39439313 | 1.43163594 | 1.4442839 |
| A_55_P2016 | 26158   | Detected   | 16944.7 | Detected   | 33829.6 | Detected   | 36152.5 | Detected   | Me1           | 1.382081963 | 1.2932793  | 2.13355799 | 1.9964709 |
| A_55_P2127 | 17.8    | Detected   | 76.5    | Detected   | 43.2    | Detected   | 24.6    | Not Detect | Dok7          | 1.382022472 | 2.42696629 | 0.32156863 | 0.5647059 |
| A_55_P1991 | 323.1   | Detected   | 383.6   | Detected   | 349.5   | Detected   | 446.5   | Detected   | Nwd1          | 1.381925101 | 1.08170845 | 1.16397289 | 0.9111053 |
| A_51_P4954 | 11      | Not Detect | 22.8    | Detected   | 16.2    | Not Detect | 15.2    | Not Detect | Gad2          | 1.381818182 | 1.47272727 | 0.66666667 | 0.7105263 |
| A_51_P1245 | 56347.5 | Detected   | 42101.1 | Detected   | 44713.7 | Detected   | 77858.7 | Detected   | Mpp1          | 1.381759617 | 0.79353476 | 1.84932698 | 1.0620554 |
| A_55_P1973 | 136     | Detected   | 160.4   | Detected   | 202.6   | Detected   | 187.9   | Detected   | Bbs10         | 1.381617647 | 1.48970588 | 1.17144638 | 1.2630923 |
| A_52_P6717 | 560.1   | Detected   | 437.4   | Detected   | 626.8   | Detected   | 773.8   | Detected   | Plscr4        | 1.381539011 | 1.11908588 | 1.76909008 | 1.4330133 |
| A_51_P3349 | 1092.5  | Detected   | 1572.2  | Detected   | 17958.3 | Detected   | 1509.3  | Detected   | Apoc2         | 1.381510297 | 16.4378032 | 0.95999237 | 11.422402 |
| A_55_P2091 | 407.4   | Detected   | 3224.5  | Detected   | 1175    | Detected   | 562.8   | Detected   | BC051142      | 1.381443299 | 2.88414335 | 0.17453869 | 0.3643976 |
| A_51_P5139 | 2849.6  | Detected   | 2948.8  | Detected   | 2787.8  | Detected   | 3936.4  | Detected   | Lrpap1        | 1.381386861 | 0.97831275 | 1.3349159  | 0.9454015 |
| A_55_P2073 | 2824.5  | Detected   | 2681.6  | Detected   | 4352.4  | Detected   | 3901.6  | Detected   | Bfar          | 1.38134183  | 1.5409453  | 1.45495227 | 1.6230609 |
| A_55_P2009 | 144     | Detected   | 378.3   | Detected   | 173.4   | Detected   | 198.9   | Detected   | Creb3l1       | 1.38125     | 1.20416667 | 0.5257732  | 0.4583664 |
| A_55_P2098 | 57441.2 | Detected   | 60513   | Detected   | 78509.5 | Detected   | 79331.5 | Detected   | Uqcrq         | 1.381090576 | 1.36678029 | 1.31098276 | 1.2973989 |
| A_55_P2067 | 4747.8  | Detected   | 4821.9  | Detected   | 4602.5  | Detected   | 6557.1  | Detected   | Scfd2         | 1.381081764 | 0.96939635 | 1.35985815 | 0.9544993 |
| A_51_P2471 | 6.3     | Not Detect | 3.1     | Not Detect | 23.9    | Detected   | 8.7     | Not Detect | Wdr96         | 1.380952381 | 3.79365079 | 2.80645161 | 7.7096774 |
| A_51_P2953 | 10.5    | Not Detect | 18      | Detected   | 13      | Not Detect | 14.5    | Not Detect | Ankrd2        | 1.380952381 | 1.23809524 | 0.80555556 | 0.7222222 |
| A_55_P2048 | 17008.7 | Detected   | 12655   | Detected   | 15123.2 | Detected   | 23487.9 | Detected   | Larp4b        | 1.380934463 | 0.88914497 | 1.85601738 | 1.1950375 |
| A_55_P2136 | 19014.6 | Detected   | 20194.8 | Detected   | 23315.6 | Detected   | 26257.1 | Detected   | Uqcr10        | 1.380891525 | 1.22619461 | 1.30019114 | 1.1545348 |
| A_51_P1214 | 6776.9  | Detected   | 8761.2  | Detected   | 8903.4  | Detected   | 9358.1  | Detected   | Tab1          | 1.380882114 | 1.31378654 | 1.06812994 | 1.0162307 |
| A_51_P4135 | 16153.6 | Detected   | 14725.1 | Detected   | 20877.9 | Detected   | 22306.2 | Detected   | Txndc11       | 1.380881042 | 1.29246112 | 1.514842   | 1.4178444 |
| A_66_P1283 | 9127.5  | Detected   | 9746.9  | Detected   | 11444   | Detected   | 12603.9 | Detected   | Mtmr2         | 1.380870994 | 1.25379348 | 1.29311884 | 1.1741169 |
| A_51_P2057 | 12641.5 | Detected   | 10889   | Detected   | 14784.4 | Detected   | 17454.9 | Detected   | Ube3b         | 1.380761777 | 1.16951311 | 1.60298466 | 1.3577372 |
| A_51_P2026 | 963.9   | Detected   | 1067.3  | Detected   | 1326.3  | Detected   | 1330.9  | Detected   | Mterfd3       | 1.380744891 | 1.37597261 | 1.24697836 | 1.2426684 |
| A_55_P1959 | 8973.1  | Detected   | 5954    | Detected   | 11667.2 | Detected   | 12388   | Detected   | Rbm47         | 1.380570817 | 1.30024183 | 2.08061807 | 1.9595566 |
| A_55_P1999 | 11782   | Detected   | 10893.9 | Detected   | 14360.4 | Detected   | 16263.7 | Detected   | Tma7          | 1.380385334 | 1.2188423  | 1.49291806 | 1.3182056 |
| A_55_P2336 | 16.3    | Detected   | 23.7    | Detected   | 30.6    | Detected   | 22.5    | Not Detect | 6330564D18Rik | 1.380368098 | 1.87730061 | 0.94936709 | 1.2911392 |
| A_51_P5200 | 26957.7 | Detected   | 31833.6 | Detected   | 27002.9 | Detected   | 37211.1 | Detected   | Lypla2        | 1.380351439 | 1.0016767  | 1.16892529 | 0.8482515 |
| A_51_P3444 | 31.3    | Detected   | 15.6    | Not Detect | 43.3    | Detected   | 43.2    | Not Detect | Prrt2         | 1.380191693 | 1.38338658 | 2.76923077 | 2.775641  |
| A_66_P1125 | 1077.4  | Detected   | 1401.8  | Detected   | 1331.2  | Detected   | 1487    | Detected   | Yeats4        | 1.380174494 | 1.23556711 | 1.060779   | 0.9496362 |
| A_55_P2279 | 96.8    | Detected   | 169     | Detected   | 53.3    | Detected   | 133.6   | Detected   | 5930430L01Rik | 1.380165289 | 0.55061983 | 0.79053254 | 0.3153846 |
| A_55_P2023 | 5966.9  | Detected   | 6274.4  | Detected   | 6009.8  | Detected   | 8233.8  | Detected   | Ift43         | 1.379912517 | 1.00718966 | 1.31228484 | 0.9578286 |
| A_55_P2162 | 420.9   | Detected   | 400.5   | Detected   | 413.1   | Detected   | 580.8   | Detected   | Zfp780b       | 1.379900214 | 0.98146828 | 1.45018727 | 1.0314607 |
| A_52_P6525 | 18476.1 | Detected   | 24158.4 | Detected   | 24770   | Detected   | 25493.9 | Detected   | Lman1         | 1.379831241 | 1.34065089 | 1.05528098 | 1.0253162 |
| A_55_P1978 | 2277.7  | Detected   | 2322.7  | Detected   | 3356    | Detected   | 3142.7  | Detected   | Wasf1         | 1.379769065 | 1.47341617 | 1.35303741 | 1.4448702 |
| A_52_P6841 | 120.6   | Detected   | 108     | Detected   | 114.1   | Detected   | 166.4   | Detected   | 4933432I09Rik | 1.379767828 | 0.94610282 | 1.54074074 | 1.0564815 |
| A_51_P3856 | 30214.7 | Detected   | 37878.3 | Detected   | 44103.8 | Detected   | 41687.9 | Detected   | Mrpl53        | 1.379722453 | 1.45968022 | 1.10057474 | 1.1643553 |

|            |          |          |          |          |          |          |          |          |               |             |            |            |           |
|------------|----------|----------|----------|----------|----------|----------|----------|----------|---------------|-------------|------------|------------|-----------|
| A_52_P4970 | 98.5     | Detected | 118.4    | Detected | 110.9    | Detected | 135.9    | Detected | Supt20        | 1.379695431 | 1.12588832 | 1.14780405 | 0.9366554 |
| A_52_P1093 | 2793.4   | Detected | 3039.8   | Detected | 3162.8   | Detected | 3854     | Detected | Tbl2          | 1.379680676 | 1.13224028 | 1.26784657 | 1.0404632 |
| A_55_P2172 | 128.8    | Detected | 145      | Detected | 160.7    | Detected | 177.7    | Detected | Mettl6        | 1.379658385 | 1.24767081 | 1.22551724 | 1.1082759 |
| A_55_P2076 | 41422.8  | Detected | 31514.9  | Detected | 55803.6  | Detected | 57137.3  | Detected | Acaa1a        | 1.379368367 | 1.34717112 | 1.81302495 | 1.7707053 |
| A_51_P2555 | 792.3    | Detected | 933.6    | Detected | 777.2    | Detected | 1092.8   | Detected | Smarcad1      | 1.379275527 | 0.98094156 | 1.17052271 | 0.8324764 |
| A_51_P4117 | 25931.7  | Detected | 49937.9  | Detected | 26556.9  | Detected | 35765.1  | Detected | Nip7          | 1.379203832 | 1.02410949 | 0.71619151 | 0.5317985 |
| A_52_P2385 | 80.2     | Detected | 79.9     | Detected | 71.7     | Detected | 110.6    | Detected | Sprn          | 1.379052369 | 0.89401496 | 1.38423029 | 0.8973717 |
| A_55_P2219 | 381.6    | Detected | 422.9    | Detected | 477.5    | Detected | 526.2    | Detected | Tmf1          | 1.378930818 | 1.25131027 | 1.24426578 | 1.1291085 |
| A_55_P2279 | 832.5    | Detected | 918.2    | Detected | 743.5    | Detected | 1147.9   | Detected | 2900076A07Rik | 1.378858859 | 0.89309309 | 1.25016336 | 0.8097364 |
| A_55_P2145 | 90.3     | Detected | 89.3     | Detected | 108.5    | Detected | 124.5    | Detected | Pcf11         | 1.378737542 | 1.20155039 | 1.39417693 | 1.2150056 |
| A_55_P2071 | 445.2    | Detected | 602.3    | Detected | 599.3    | Detected | 613.8    | Detected | Pick1         | 1.378706199 | 1.34613657 | 1.01909348 | 0.9950191 |
| A_55_P2159 | 8759.7   | Detected | 9706.5   | Detected | 8497.6   | Detected | 12077    | Detected | Ing1          | 1.378700184 | 0.97007888 | 1.24421779 | 0.8754546 |
| A_55_P2099 | 183191.4 | Detected | 284783.7 | Detected | 240017.1 | Detected | 252559.9 | Detected | H2afz         | 1.378666793 | 1.31019851 | 0.88684816 | 0.8428049 |
| A_55_P2021 | 145.8    | Detected | 153      | Detected | 165.1    | Detected | 201      | Detected | Gm13931       | 1.378600823 | 1.13237311 | 1.31372549 | 1.079085  |
| A_51_P4832 | 5667.1   | Detected | 8959.8   | Detected | 4924.3   | Detected | 7812.1   | Detected | Prnp          | 1.378500468 | 0.86892767 | 0.87190562 | 0.5495993 |
| A_52_P3803 | 161.2    | Detected | 252.7    | Detected | 233.4    | Detected | 222.2    | Detected | Phf11d        | 1.378411911 | 1.44789082 | 0.87930352 | 0.9236249 |
| A_55_P1992 | 22233.7  | Detected | 9064.4   | Detected | 10447.8  | Detected | 30645.2  | Detected | 2210407C18Rik | 1.378322097 | 0.46990829 | 3.3808305  | 1.152619  |
| A_55_P2018 | 1939.7   | Detected | 1841.5   | Detected | 2604.4   | Detected | 2673.4   | Detected | Pgap3         | 1.378254369 | 1.34268186 | 1.45175129 | 1.4142818 |
| A_55_P2355 | 368.4    | Detected | 348.3    | Detected | 319.8    | Detected | 507.7    | Detected | A130019P10Rik | 1.378121607 | 0.86807818 | 1.45765145 | 0.918174  |
| A_51_P3433 | 4148.5   | Detected | 5118.4   | Detected | 4453.6   | Detected | 5716.6   | Detected | Cmas          | 1.377992045 | 1.07354465 | 1.11687246 | 0.8701157 |
| A_55_P2043 | 2871.6   | Detected | 2426.4   | Detected | 2940.1   | Detected | 3956.6   | Detected | Akr1e1        | 1.377838139 | 1.0238543  | 1.63064622 | 1.2117128 |
| A_55_P2001 | 2153.4   | Detected | 2236.9   | Detected | 2346.9   | Detected | 2966.9   | Detected | Rnf180        | 1.377774682 | 1.0898579  | 1.32634449 | 1.0491752 |
| A_55_P2037 | 3229.8   | Detected | 3470.5   | Detected | 4010.3   | Detected | 4449.9   | Detected | AA684185      | 1.377763329 | 1.24165583 | 1.28220717 | 1.1555395 |
| A_55_P2052 | 31449.7  | Detected | 35463.5  | Detected | 52318.3  | Detected | 43329.1  | Detected | Eif1ad        | 1.377726974 | 1.66355482 | 1.22179424 | 1.4752718 |
| A_55_P2060 | 4078.6   | Detected | 4213.1   | Detected | 5088.7   | Detected | 5618.8   | Detected | Clk2          | 1.377629579 | 1.24765851 | 1.33364981 | 1.207828  |
| A_52_P1526 | 1998.6   | Detected | 2914.2   | Detected | 2105.9   | Detected | 2753.2   | Detected | Tmem17        | 1.377564295 | 1.05368758 | 0.94475328 | 0.722634  |
| A_55_P2007 | 559.4    | Detected | 577.7    | Detected | 475      | Detected | 770.6    | Detected | Prkaca        | 1.377547372 | 0.84912406 | 1.33391033 | 0.8222261 |
| A_51_P3330 | 6041.4   | Detected | 7664.1   | Detected | 7515.6   | Detected | 8321.9   | Detected | Anapc16       | 1.37747873  | 1.24401629 | 1.08582873 | 0.9806239 |
| A_55_P2003 | 415.5    | Detected | 417.6    | Detected | 433.2    | Detected | 572.3    | Detected | P4ha3         | 1.377376655 | 1.04259928 | 1.37045019 | 1.0373563 |
| A_55_P2069 | 48.8     | Detected | 44.8     | Detected | 54.2     | Detected | 67.2     | Detected | Zfp82         | 1.37704918  | 1.11065574 | 1.5        | 1.2098214 |
| A_52_P5627 | 644.3    | Detected | 1420.4   | Detected | 577      | Detected | 887.2    | Detected | Ccdc66        | 1.376998293 | 0.89554555 | 0.62461279 | 0.4062236 |
| A_52_P2003 | 46825.8  | Detected | 54946.3  | Detected | 60833.6  | Detected | 64473    | Detected | Aco2          | 1.376869162 | 1.29914705 | 1.17338201 | 1.1071464 |
| A_66_P1147 | 116.5    | Detected | 157.1    | Detected | 112.5    | Detected | 160.4    | Detected | Kcna7         | 1.376824034 | 0.96566524 | 1.02100573 | 0.7161044 |
| A_55_P1999 | 1655.6   | Detected | 1520.5   | Detected | 1856.9   | Detected | 2279.3   | Detected | Tchp          | 1.37672143  | 1.12158734 | 1.49904637 | 1.221243  |
| A_52_P8169 | 36.9     | Detected | 41.3     | Detected | 32.7     | Detected | 50.8     | Detected | LOC100502592  | 1.376693767 | 0.88617886 | 1.23002421 | 0.7917676 |
| A_55_P2091 | 1387     | Detected | 1369.1   | Detected | 1547.3   | Detected | 1909.4   | Detected | Gm6209        | 1.376640231 | 1.11557318 | 1.39463881 | 1.1301585 |
| A_52_P2922 | 373.6    | Detected | 386.6    | Detected | 377.9    | Detected | 514.3    | Detected | Rnf115        | 1.376605996 | 1.01150964 | 1.33031557 | 0.9774961 |
| A_66_P1019 | 449.6    | Detected | 822.4    | Detected | 131.4    | Detected | 618.9    | Detected | Gm9706        | 1.37655694  | 0.29225979 | 0.7525535  | 0.1597763 |
| A_55_P1999 | 194.2    | Detected | 167.7    | Detected | 199.3    | Detected | 267.3    | Detected | Zfp760        | 1.376416066 | 1.02626159 | 1.59391771 | 1.1884317 |
| A_51_P4593 | 44068.9  | Detected | 29026.6  | Detected | 61137.6  | Detected | 60656.2  | Detected | Dstn          | 1.376394691 | 1.38731849 | 2.08967637 | 2.1062612 |

|            |                  |                   |                   |                   |               |             |            |            |           |
|------------|------------------|-------------------|-------------------|-------------------|---------------|-------------|------------|------------|-----------|
| A_55_P2081 | 72 Detected      | 116.6 Detected    | 76 Detected       | 99.1 Detected     | Gnas          | 1.376388889 | 1.05555556 | 0.84991424 | 0.651801  |
| A_52_P3079 | 746.6 Detected   | 616.1 Detected    | 693.8 Detected    | 1027.6 Detected   | Abca5         | 1.37637289  | 0.9292794  | 1.66791105 | 1.1261159 |
| A_55_P2103 | 817.3 Detected   | 864.7 Detected    | 941.7 Detected    | 1124.9 Detected   | Hic2          | 1.376361189 | 1.15220849 | 1.30091361 | 1.0890482 |
| A_52_P3049 | 22.6 Detected    | 19.5 Detected     | 18.9 Detected     | 31.1 Not Detect   | Olfr153       | 1.376106195 | 0.83628319 | 1.59487179 | 0.9692308 |
| A_55_P2098 | 32037.3 Detected | 28004.9 Detected  | 32801.8 Detected  | 44085.7 Detected  | Trim25        | 1.376074139 | 1.02386281 | 1.5742138  | 1.1712879 |
| A_52_P3599 | 5327.2 Detected  | 4183.4 Detected   | 6018.9 Detected   | 7330.4 Detected   | Cpd           | 1.376032437 | 1.12984307 | 1.75225893 | 1.4387579 |
| A_55_P2045 | 6783.2 Detected  | 7143 Detected     | 13083.5 Detected  | 9333.3 Detected   | Tmem242       | 1.375943507 | 1.92880941 | 1.30663587 | 1.8316534 |
| A_51_P3513 | 2087.8 Detected  | 3326.2 Detected   | 2503.4 Detected   | 2872.6 Detected   | Vps45         | 1.375898075 | 1.19906121 | 0.86362816 | 0.7526306 |
| A_52_P4929 | 10712.2 Detected | 8802.2 Detected   | 9764.6 Detected   | 14738.3 Detected  | Stx4a         | 1.375842497 | 0.91154011 | 1.67438822 | 1.1093363 |
| A_52_P5947 | 89579.7 Detected | 97912.8 Detected  | 90580.4 Detected  | 123245.8 Detected | Aprt          | 1.375822871 | 1.01117106 | 1.25873022 | 0.925113  |
| A_55_P1989 | 6332.4 Detected  | 6689.8 Detected   | 7527.1 Detected   | 8709.4 Detected   | Nfkbib        | 1.375371107 | 1.18866465 | 1.30189243 | 1.1251607 |
| A_66_P1250 | 189.7 Detected   | 165.2 Detected    | 155.7 Detected    | 260.9 Detected    | Gm9648        | 1.375329468 | 0.82076964 | 1.57929782 | 0.9424939 |
| A_55_P1981 | 195.3 Detected   | 230.3 Detected    | 326.2 Detected    | 268.6 Detected    | Pex26         | 1.37532002  | 1.6702509  | 1.16630482 | 1.4164134 |
| A_52_P3428 | 3260.8 Detected  | 3858 Detected     | 4818.6 Detected   | 4484.5 Detected   | Mrps33        | 1.375276006 | 1.47773553 | 1.16238984 | 1.2489891 |
| A_51_P1937 | 3600.7 Detected  | 4835.8 Detected   | 5286.2 Detected   | 4951.6 Detected   | Supv3l1       | 1.375177049 | 1.46810342 | 1.0239464  | 1.0931387 |
| A_55_P2131 | 332.4 Detected   | 436.2 Detected    | 492.5 Detected    | 457.1 Detected    | Rmnd5a        | 1.375150421 | 1.48164862 | 1.0479138  | 1.1290692 |
| A_51_P3659 | 1784.8 Detected  | 1675.2 Detected   | 2525.6 Detected   | 2454.2 Detected   | Ankzf1        | 1.375056029 | 1.41506051 | 1.4650191  | 1.5076409 |
| A_66_P1062 | 142.4 Detected   | 170.8 Detected    | 151.1 Detected    | 195.8 Detected    | Nccrp1        | 1.375       | 1.06109551 | 1.14637002 | 0.8846604 |
| A_55_P2013 | 17.6 Detected    | 16.8 Detected     | 10.9 Not Detect   | 24.2 Not Detect   | LOC101056654  | 1.375       | 0.61931818 | 1.44047619 | 0.6488095 |
| A_66_P1130 | 9968 Detected    | 15280.2 Detected  | 9698.7 Detected   | 13703.9 Detected  | Itgb1         | 1.374789326 | 0.97298355 | 0.89684036 | 0.6347234 |
| A_66_P1300 | 147.3 Detected   | 190.3 Detected    | 153.8 Detected    | 202.5 Detected    | Zbtb44        | 1.374745418 | 1.04412763 | 1.0641093  | 0.8081976 |
| A_55_P2137 | 4619.9 Detected  | 6000.6 Detected   | 3255.3 Detected   | 6350.9 Detected   | Kctd11        | 1.374683435 | 0.70462564 | 1.0583775  | 0.5424958 |
| A_51_P5099 | 135.6 Detected   | 148.2 Detected    | 128.9 Detected    | 186.4 Detected    | Slc5a10       | 1.374631268 | 0.95058997 | 1.25775978 | 0.8697706 |
| A_55_P2183 | 22.7 Detected    | 21.5 Detected     | 27.2 Detected     | 31.2 Not Detect   | Atg9b         | 1.374449339 | 1.19823789 | 1.45116279 | 1.2651163 |
| A_55_P2249 | 369.5 Detected   | 334.5 Detected    | 338.8 Detected    | 507.8 Detected    | E130304I02Rik | 1.374289581 | 0.91691475 | 1.5180867  | 1.012855  |
| A_55_P1998 | 443.6 Detected   | 481.2 Detected    | 509.5 Detected    | 609.6 Detected    | Ncdn          | 1.374211001 | 1.14855726 | 1.26683292 | 1.0588113 |
| A_52_P6483 | 20043.8 Detected | 23659.8 Detected  | 24241 Detected    | 27544.2 Detected  | Pigs          | 1.374200501 | 1.20940141 | 1.16417721 | 1.0245649 |
| A_51_P3045 | 4593.1 Detected  | 3935.3 Detected   | 5152.7 Detected   | 6311.4 Detected   | BC017158      | 1.374104635 | 1.12183493 | 1.60379132 | 1.3093538 |
| A_51_P3491 | 68.2 Detected    | 57 Detected       | 107 Detected      | 93.7 Detected     | Ctnnd1        | 1.373900293 | 1.56891496 | 1.64385965 | 1.877193  |
| A_55_P1963 | 5569.7 Detected  | 6757.1 Detected   | 5745.5 Detected   | 7651.8 Detected   | Abcb10        | 1.373826238 | 1.03156364 | 1.13240887 | 0.8502908 |
| A_55_P2044 | 2721.8 Detected  | 6080 Detected     | 2265.2 Detected   | 3739.2 Detected   | Loxl4         | 1.373796752 | 0.83224337 | 0.615      | 0.3725658 |
| A_55_P2090 | 20.6 Detected    | 90.8 Detected     | 3.5 Not Detect    | 28.3 Not Detect   | Mab21l3       | 1.373786408 | 0.16990291 | 0.31167401 | 0.0385463 |
| A_55_P2017 | 1463.2 Detected  | 1570.2 Detected   | 1531.2 Detected   | 2009.9 Detected   | Cdc14a        | 1.373633133 | 1.04647348 | 1.28002802 | 0.9751624 |
| A_55_P1963 | 4705.9 Detected  | 6804.4 Detected   | 5292.8 Detected   | 6463.9 Detected   | Chchd7        | 1.373573599 | 1.12471578 | 0.94995885 | 0.7778496 |
| A_55_P2074 | 1761.9 Detected  | 2162.1 Detected   | 1774.1 Detected   | 2419.8 Detected   | Ngf           | 1.373403712 | 1.00692434 | 1.11918968 | 0.8205448 |
| A_55_P2023 | 158.1 Detected   | 127.5 Detected    | 132.2 Detected    | 217.1 Detected    | Prss28        | 1.373181531 | 0.83617963 | 1.7027451  | 1.0368627 |
| A_51_P1181 | 2938.1 Detected  | 4241.3 Detected   | 3083 Detected     | 4034.1 Detected   | Skil          | 1.37303019  | 1.04931759 | 0.95114705 | 0.7268998 |
| A_52_P5331 | 1464.2 Detected  | 1357.9 Detected   | 1596.4 Detected   | 2010.3 Detected   | Ddit3         | 1.372968174 | 1.09028821 | 1.48044775 | 1.1756389 |
| A_55_P2035 | 90397.7 Detected | 112346.1 Detected | 137288.3 Detected | 124107 Detected   | Prkcsb        | 1.372899974 | 1.51871452 | 1.10468454 | 1.2220122 |
| A_66_P1160 | 82.6 Detected    | 98.5 Detected     | 106.1 Detected    | 113.4 Detected    | Ints9         | 1.372881356 | 1.28450363 | 1.15126904 | 1.0771574 |

|            |          |            |         |          |          |          |          |            |               |             |            |            |           |
|------------|----------|------------|---------|----------|----------|----------|----------|------------|---------------|-------------|------------|------------|-----------|
| A_55_P2056 | 1972.5   | Detected   | 1940    | Detected | 2904.9   | Detected | 2707.8   | Detected   | Pdlim5        | 1.372775665 | 1.47269962 | 1.3957732  | 1.4973711 |
| A_55_P2096 | 87.2     | Detected   | 85      | Detected | 97.5     | Detected | 119.7    | Detected   | Ank2          | 1.372706422 | 1.11811927 | 1.40823529 | 1.1470588 |
| A_55_P2188 | 10539.9  | Detected   | 14017.4 | Detected | 12030.2  | Detected | 14467.6  | Detected   | Uhrf1bp1l     | 1.372650594 | 1.14139603 | 1.03211723 | 0.8582333 |
| A_55_P2079 | 10.2     | Not Detect | 21      | Detected | 18.9     | Detected | 14       | Not Detect | Ccdc78        | 1.37254902  | 1.85294118 | 0.66666667 | 0.9       |
| A_55_P2003 | 195.7    | Detected   | 186.2   | Detected | 202.5    | Detected | 268.6    | Detected   | Arl9          | 1.372508942 | 1.03474706 | 1.44253491 | 1.0875403 |
| A_51_P4135 | 29.8     | Detected   | 40.6    | Detected | 34.7     | Detected | 40.9     | Not Detect | 2010109A12Rik | 1.372483221 | 1.16442953 | 1.00738916 | 0.8546798 |
| A_55_P2046 | 101.5    | Detected   | 88.1    | Detected | 110.9    | Detected | 139.3    | Detected   | Mapkap1       | 1.372413793 | 1.09261084 | 1.58115778 | 1.2587968 |
| A_51_P2351 | 912      | Detected   | 870.2   | Detected | 1682.1   | Detected | 1251.6   | Detected   | Nfkbie        | 1.372368421 | 1.84440789 | 1.43829005 | 1.9330039 |
| A_55_P2075 | 3621     | Detected   | 3265.9  | Detected | 4472.5   | Detected | 4968.9   | Detected   | Sirt3         | 1.372245236 | 1.23515603 | 1.52144891 | 1.3694541 |
| A_55_P2103 | 2926.9   | Detected   | 2687.1  | Detected | 4155.9   | Detected | 4016.3   | Detected   | Twf2          | 1.372202672 | 1.41989819 | 1.49465967 | 1.5466116 |
| A_55_P2180 | 5273.9   | Detected   | 5993.7  | Detected | 5948     | Detected | 7236.7   | Detected   | Mrpl10        | 1.372172396 | 1.12781812 | 1.20738442 | 0.9923753 |
| A_52_P8872 | 176      | Detected   | 152.1   | Detected | 190.9    | Detected | 241.5    | Detected   | Senp7         | 1.372159091 | 1.08465909 | 1.5877712  | 1.2550953 |
| A_65_P0254 | 2885     | Detected   | 2487.2  | Detected | 2648     | Detected | 3958.6   | Detected   | Srp72         | 1.372131716 | 0.91785095 | 1.59158894 | 1.064651  |
| A_52_P4036 | 7984.3   | Detected   | 10296.1 | Detected | 10740.8  | Detected | 10955    | Detected   | Mrpl42        | 1.372067683 | 1.34524003 | 1.0639951  | 1.0431911 |
| A_55_P2048 | 421.7    | Detected   | 1082    | Detected | 75.1     | Detected | 578.6    | Detected   | Kif5c         | 1.372065449 | 0.17808869 | 0.53475046 | 0.0694085 |
| A_55_P2431 | 3486.2   | Detected   | 2368.6  | Detected | 3357.8   | Detected | 4782.9   | Detected   | Its1          | 1.371952269 | 0.96316907 | 2.0192941  | 1.4176307 |
| A_52_P5626 | 19.9     | Detected   | 36.3    | Detected | 23       | Detected | 27.3     | Not Detect | Sult4a1       | 1.371859296 | 1.15577889 | 0.75206612 | 0.6336088 |
| A_55_P2146 | 9186.7   | Detected   | 6406.7  | Detected | 8595.2   | Detected | 12602.8  | Detected   | Cerk          | 1.371852787 | 0.93561344 | 1.96712816 | 1.3415955 |
| A_55_P1971 | 4424.4   | Detected   | 4210.2  | Detected | 3339.6   | Detected | 6069.3   | Detected   | Eya3          | 1.371779224 | 0.75481421 | 1.44157047 | 0.7932165 |
| A_55_P2033 | 776      | Detected   | 1001.9  | Detected | 767.9    | Detected | 1064.4   | Detected   | Tsga8         | 1.371649485 | 0.98956186 | 1.06238148 | 0.7664438 |
| A_55_P2002 | 379.5    | Detected   | 383.5   | Detected | 448.4    | Detected | 520.5    | Detected   | Aifm2         | 1.371541502 | 1.18155468 | 1.35723598 | 1.1692308 |
| A_55_P2027 | 3281.7   | Detected   | 3485.1  | Detected | 4554.3   | Detected | 4500.8   | Detected   | Irak1bp1      | 1.371484292 | 1.38778682 | 1.2914407  | 1.3067918 |
| A_55_P2166 | 67318    | Detected   | 77661.7 | Detected | 84474    | Detected | 92323.4  | Detected   | Uqcr10        | 1.371451915 | 1.25485011 | 1.18878933 | 1.0877176 |
| A_51_P4317 | 534.5    | Detected   | 905.9   | Detected | 541.7    | Detected | 733      | Detected   | Cth           | 1.371375117 | 1.01347053 | 0.80914008 | 0.5979689 |
| A_55_P1987 | 282.2    | Detected   | 301.1   | Detected | 327.7    | Detected | 387      | Detected   | Epb4.1l2      | 1.371367824 | 1.16123317 | 1.28528728 | 1.0883427 |
| A_52_P1684 | 1454.4   | Detected   | 1287.9  | Detected | 1829.9   | Detected | 1994.5   | Detected   | Mapk11        | 1.371355886 | 1.25818207 | 1.54864508 | 1.4208401 |
| A_55_P2148 | 75.4     | Detected   | 47.8    | Detected | 59.4     | Detected | 103.4    | Detected   | Slc4a3        | 1.371352785 | 0.78779841 | 2.16317992 | 1.2426778 |
| A_66_P1116 | 3393.3   | Detected   | 3625.6  | Detected | 4129.5   | Detected | 4653     | Detected   | Nprl3         | 1.371231545 | 1.21695694 | 1.28337379 | 1.1389839 |
| A_55_P2050 | 38.8     | Detected   | 42.6    | Detected | 29.5     | Detected | 53.2     | Detected   | Scml2         | 1.371134021 | 0.76030928 | 1.24882629 | 0.6924883 |
| A_51_P3777 | 567.8    | Detected   | 325.1   | Detected | 448.7    | Detected | 778.5    | Detected   | Rnasel        | 1.371081367 | 0.79024304 | 2.3946478  | 1.3801907 |
| A_51_P3535 | 10305.7  | Detected   | 9676.9  | Detected | 13649.5  | Detected | 14129.7  | Detected   | Commd4        | 1.371056794 | 1.32446122 | 1.46014736 | 1.410524  |
| A_55_P2118 | 132670.9 | Detected   | 157349  | Detected | 146683.4 | Detected | 181897.1 | Detected   | Atp5j2        | 1.371039919 | 1.10561849 | 1.15601052 | 0.9322169 |
| A_52_P4259 | 64.7     | Detected   | 59.8    | Detected | 62.5     | Detected | 88.7     | Detected   | 1700067K01Rik | 1.370942813 | 0.96599691 | 1.48327759 | 1.0451505 |
| A_55_P2033 | 79       | Detected   | 85.8    | Detected | 69.9     | Detected | 108.3    | Detected   | A230051N06Rik | 1.370886076 | 0.88481013 | 1.26223776 | 0.8146853 |
| A_55_P1989 | 6524.7   | Detected   | 5350.4  | Detected | 9178.7   | Detected | 8944.4   | Detected   | Eml2          | 1.3708523   | 1.406762   | 1.67172548 | 1.7155166 |
| A_52_P5213 | 3211.5   | Detected   | 5028.9  | Detected | 4040.6   | Detected | 4402.2   | Detected   | Chd1l         | 1.370761326 | 1.25816597 | 0.8753803  | 0.8034759 |
| A_55_P2021 | 880.8    | Detected   | 827.8   | Detected | 844.5    | Detected | 1207.3   | Detected   | Clic4         | 1.37068574  | 0.95878747 | 1.45844407 | 1.020174  |
| A_52_P3838 | 6777.5   | Detected   | 5913    | Detected | 7487     | Detected | 9289.8   | Detected   | Cmc1          | 1.370682405 | 1.10468462 | 1.57108067 | 1.2661931 |
| A_55_P2095 | 5170.7   | Detected   | 5155.6  | Detected | 5889.9   | Detected | 7087.2   | Detected   | Syncrip       | 1.370646141 | 1.13909142 | 1.37466056 | 1.1424277 |
| A_52_P8423 | 100.1    | Detected   | 81.1    | Detected | 158.8    | Detected | 137.2    | Detected   | Map4k2        | 1.370629371 | 1.58641359 | 1.69173859 | 1.9580764 |



|            |          |            |          |            |          |            |          |            |               |             |            |            |           |
|------------|----------|------------|----------|------------|----------|------------|----------|------------|---------------|-------------|------------|------------|-----------|
| A_55_P2146 | 273.9    | Detected   | 276      | Detected   | 286.7    | Detected   | 375.4    | Detected   | Lmx1b         | 1.370573202 | 1.04673238 | 1.36014493 | 1.0387681 |
| A_66_P1244 | 35989.2  | Detected   | 31740    | Detected   | 50236.7  | Detected   | 49324.1  | Detected   | Imp3          | 1.370525046 | 1.39588265 | 1.55400441 | 1.5827568 |
| A_52_P6539 | 61.3     | Detected   | 72.6     | Detected   | 49.9     | Detected   | 84       | Detected   | Thap2         | 1.370309951 | 0.81402936 | 1.15702479 | 0.6873278 |
| A_51_P3200 | 6238.7   | Detected   | 5999.6   | Detected   | 8413.9   | Detected   | 8548.8   | Detected   | Gclm          | 1.370285476 | 1.34866238 | 1.42489499 | 1.4024102 |
| A_51_P4222 | 23081.9  | Detected   | 24767.7  | Detected   | 26765.3  | Detected   | 31627    | Detected   | Dpagt1        | 1.370207825 | 1.15957958 | 1.27694538 | 1.0806534 |
| A_55_P2131 | 2898.4   | Detected   | 2258.9   | Detected   | 2067.8   | Detected   | 3971     | Detected   | Helq          | 1.370066243 | 0.7134281  | 1.75793528 | 0.9154013 |
| A_55_P2075 | 1778     | Detected   | 2426.4   | Detected   | 1875.1   | Detected   | 2435.9   | Detected   | Tti2          | 1.370022497 | 1.05461192 | 1.00391527 | 0.772791  |
| A_55_P1976 | 316.1    | Detected   | 318.5    | Detected   | 327      | Detected   | 433      | Detected   | Tmod4         | 1.369819677 | 1.03448276 | 1.35949765 | 1.0266876 |
| A_51_P4667 | 757.8    | Detected   | 1031.7   | Detected   | 727.6    | Detected   | 1038     | Detected   | Mau2          | 1.369754553 | 0.9601478  | 1.00610643 | 0.7052438 |
| A_55_P1984 | 4391.3   | Detected   | 4822.1   | Detected   | 3843.2   | Detected   | 6014.2   | Detected   | Efcab14       | 1.369571653 | 0.87518502 | 1.24721594 | 0.7969972 |
| A_55_P2032 | 294.3    | Detected   | 289.3    | Detected   | 274.6    | Detected   | 403      | Detected   | Trim7         | 1.369351002 | 0.9330615  | 1.39301763 | 0.9491877 |
| A_52_P2880 | 12564.3  | Detected   | 12099.9  | Detected   | 16050.9  | Detected   | 17198.9  | Detected   | Foxm1         | 1.36887053  | 1.27750054 | 1.42140844 | 1.3265316 |
| A_55_P2089 | 50.7     | Detected   | 52.1     | Detected   | 56.5     | Detected   | 69.4     | Detected   | Atf7          | 1.368836292 | 1.11439842 | 1.33205374 | 1.084453  |
| A_52_P3564 | 28.5     | Detected   | 29.9     | Detected   | 31.3     | Detected   | 39       | Not Detect | Tmem95        | 1.368421053 | 1.09824561 | 1.30434783 | 1.0468227 |
| A_55_P2276 | 77.9     | Detected   | 72.3     | Detected   | 73.4     | Detected   | 106.6    | Detected   | 1700064N11Rik | 1.368421053 | 0.94223363 | 1.47441217 | 1.0152144 |
| A_55_P2176 | 1108     | Detected   | 1008.7   | Detected   | 886.6    | Detected   | 1516.1   | Detected   | St6galnac4    | 1.3683213   | 0.80018051 | 1.50302369 | 0.8789531 |
| A_52_P5004 | 24937.5  | Detected   | 27355.1  | Detected   | 36206.1  | Detected   | 34105.4  | Detected   | Lars          | 1.367635088 | 1.45187368 | 1.24676569 | 1.3235594 |
| A_51_P2762 | 791.3    | Detected   | 981.6    | Detected   | 1171.5   | Detected   | 1082.2   | Detected   | Pnpla7        | 1.367622899 | 1.48047517 | 1.10248574 | 1.1934597 |
| A_55_P2054 | 567      | Detected   | 690      | Detected   | 708.8    | Detected   | 775.4    | Detected   | Cox4i2        | 1.367548501 | 1.25008818 | 1.12376812 | 1.0272464 |
| A_55_P1969 | 5970.8   | Detected   | 6265.8   | Detected   | 8706.5   | Detected   | 8165     | Detected   | Sdcbp         | 1.367488444 | 1.45817981 | 1.30310575 | 1.3895273 |
| A_55_P2167 | 505.2    | Detected   | 552.3    | Detected   | 461.3    | Detected   | 690.8    | Detected   | Cort          | 1.367379256 | 0.91310372 | 1.25076951 | 0.8352345 |
| A_55_P2153 | 1731.5   | Detected   | 1800.8   | Detected   | 1860.4   | Detected   | 2367.5   | Detected   | Zkscan3       | 1.36731158  | 1.07444412 | 1.31469347 | 1.0330964 |
| A_55_P2058 | 6947.4   | Detected   | 5923.6   | Detected   | 7785.7   | Detected   | 9499     | Detected   | Mvk           | 1.367274088 | 1.12066385 | 1.60358566 | 1.3143528 |
| A_52_P6716 | 3626.4   | Detected   | 6673.6   | Detected   | 3420.6   | Detected   | 4957.9   | Detected   | Mak16         | 1.367168542 | 0.9432495  | 0.74291237 | 0.5125569 |
| A_51_P4746 | 7.9      | Not Detect | 60       | Detected   | 7.2      | Not Detect | 10.8     | Not Detect | Esr1          | 1.367088608 | 0.91139241 | 0.18       | 0.12      |
| A_55_P2133 | 18.8     | Detected   | 13.4     | Not Detect | 21.2     | Detected   | 25.7     | Not Detect | 1110017D15Rik | 1.367021277 | 1.12765957 | 1.91791045 | 1.5820896 |
| A_55_P1967 | 84327.1  | Detected   | 123743.9 | Detected   | 111321.7 | Detected   | 115272.6 | Detected   | Gm5069        | 1.366969812 | 1.32011773 | 0.93154168 | 0.8996136 |
| A_66_P1134 | 55082.7  | Detected   | 48064    | Detected   | 75908.8  | Detected   | 75295.9  | Detected   | Pacsin2       | 1.366960951 | 1.37808786 | 1.56657582 | 1.5793276 |
| A_51_P2576 | 293.9    | Detected   | 196.8    | Detected   | 220.5    | Detected   | 401.7    | Detected   | Tspy14        | 1.366791426 | 0.75025519 | 2.04115854 | 1.1204268 |
| A_52_P6104 | 1183.1   | Detected   | 1477.7   | Detected   | 1425.6   | Detected   | 1616.9   | Detected   | Sf1           | 1.366663849 | 1.20496999 | 1.09420045 | 0.9647425 |
| A_51_P1943 | 5375.7   | Detected   | 3919.3   | Detected   | 7482.4   | Detected   | 7346.1   | Detected   | Lrrc1         | 1.366538311 | 1.39189315 | 1.87433981 | 1.9091164 |
| A_52_P6602 | 17149.2  | Detected   | 21446.5  | Detected   | 25605.5  | Detected   | 23435    | Detected   | Isy1          | 1.366536048 | 1.49310172 | 1.09271909 | 1.1939244 |
| A_51_P1137 | 970.9    | Detected   | 911.2    | Detected   | 1272.5   | Detected   | 1326.7   | Detected   | Slx1b         | 1.366464105 | 1.31063961 | 1.4559921  | 1.3965101 |
| A_66_P1269 | 102540.2 | Detected   | 110090.7 | Detected   | 106321.8 | Detected   | 140116   | Detected   | Fis1          | 1.366449451 | 1.03687919 | 1.27273239 | 0.9657655 |
| A_66_P1183 | 450      | Detected   | 495.2    | Detected   | 454.7    | Detected   | 614.9    | Detected   | Gm216         | 1.366444444 | 1.01044444 | 1.24172052 | 0.9182149 |
| A_52_P2632 | 1191     | Detected   | 1059.3   | Detected   | 1554.4   | Detected   | 1627.4   | Detected   | 3110040N11Rik | 1.366414777 | 1.30512175 | 1.53629755 | 1.4673841 |
| A_51_P1032 | 117.1    | Detected   | 51.9     | Detected   | 21.1     | Detected   | 160      | Detected   | Flrt2         | 1.366353544 | 0.18018787 | 3.08285164 | 0.4065511 |
| A_51_P2722 | 16370.3  | Detected   | 18186.6  | Detected   | 19159.3  | Detected   | 22367.3  | Detected   | Snf8          | 1.366334154 | 1.17036951 | 1.22987804 | 1.0534844 |
| A_55_P2141 | 69640.9  | Detected   | 92559.4  | Detected   | 81010.2  | Detected   | 95148.5  | Detected   | Ldha          | 1.366273268 | 1.16325608 | 1.02797231 | 0.8752239 |
| A_51_P3622 | 3894.9   | Detected   | 3943     | Detected   | 4419.1   | Detected   | 5321.4   | Detected   | Commd10       | 1.366248171 | 1.13458625 | 1.34958154 | 1.1207456 |

|            |         |          |         |          |         |          |         |            |               |             |            |            |           |
|------------|---------|----------|---------|----------|---------|----------|---------|------------|---------------|-------------|------------|------------|-----------|
| A_51_P2081 | 114.7   | Detected | 148.2   | Detected | 120.1   | Detected | 156.7   | Detected   | 3930402G23Rik | 1.366172624 | 1.04707934 | 1.05735493 | 0.8103914 |
| A_52_P2671 | 394.2   | Detected | 335.1   | Detected | 346.7   | Detected | 538.5   | Detected   | Ksr2          | 1.366057839 | 0.87950279 | 1.60698299 | 1.0346165 |
| A_55_P2151 | 33347.5 | Detected | 34805   | Detected | 35362.2 | Detected | 45553.9 | Detected   | Micu1         | 1.366036435 | 1.06041532 | 1.30883206 | 1.0160092 |
| A_55_P2286 | 309.1   | Detected | 257.9   | Detected | 167.4   | Detected | 422.2   | Detected   | 6720462K09Rik | 1.365901003 | 0.54157231 | 1.63706863 | 0.6490888 |
| A_55_P2088 | 28.7    | Detected | 43.8    | Detected | 35.2    | Detected | 39.2    | Not Detect | Cbln2         | 1.365853659 | 1.22648084 | 0.89497717 | 0.803653  |
| A_55_P2401 | 29.8    | Detected | 34.8    | Detected | 31.8    | Detected | 40.7    | Not Detect | BE949265      | 1.365771812 | 1.06711409 | 1.16954023 | 0.9137931 |
| A_55_P2182 | 259.5   | Detected | 271.7   | Detected | 320.7   | Detected | 354.4   | Detected   | Gm10835       | 1.365703276 | 1.23583815 | 1.30437983 | 1.180346  |
| A_55_P2159 | 2159    | Detected | 1613.9  | Detected | 1858.7  | Detected | 2948.5  | Detected   | Zbtb7a        | 1.365678555 | 0.86090783 | 1.82694095 | 1.1516823 |
| A_55_P2184 | 1583.1  | Detected | 1641.4  | Detected | 1621.4  | Detected | 2162    | Detected   | Gpn2          | 1.365674942 | 1.02419304 | 1.31716827 | 0.9878153 |
| A_51_P1337 | 510.9   | Detected | 501.7   | Detected | 563.7   | Detected | 697.7   | Detected   | Prickle3      | 1.365629282 | 1.10334703 | 1.39067172 | 1.1235798 |
| A_55_P2135 | 55.8    | Detected | 50.4    | Detected | 52.9    | Detected | 76.2    | Detected   | Mcoln3        | 1.365591398 | 0.94802867 | 1.51190476 | 1.0496032 |
| A_55_P2095 | 4162.7  | Detected | 5534.3  | Detected | 4900.4  | Detected | 5684.3  | Detected   | Pdf           | 1.365531986 | 1.17721671 | 1.0271037  | 0.8854598 |
| A_55_P2087 | 449.6   | Detected | 331.2   | Detected | 353     | Detected | 613.9   | Detected   | Mroh1         | 1.365435943 | 0.78514235 | 1.8535628  | 1.0658213 |
| A_51_P5177 | 114.4   | Detected | 108.6   | Detected | 105.7   | Detected | 156.2   | Detected   | Fgf11         | 1.365384615 | 0.92395105 | 1.43830571 | 0.9732965 |
| A_65_P1215 | 651.2   | Detected | 359     | Detected | 817.3   | Detected | 889.1   | Detected   | Rasa2         | 1.365325553 | 1.25506757 | 2.47660167 | 2.2766017 |
| A_55_P2100 | 184.5   | Detected | 143.6   | Detected | 108.3   | Detected | 251.9   | Detected   | 6330408A02Rik | 1.365311653 | 0.58699187 | 1.75417827 | 0.7541783 |
| A_52_P7514 | 1349.3  | Detected | 936.2   | Detected | 1473    | Detected | 1842.1  | Detected   | Lymr2         | 1.365226414 | 1.09167717 | 1.96763512 | 1.5733818 |
| A_55_P2400 | 29.3    | Detected | 25.8    | Detected | 18.8    | Detected | 40      | Not Detect | D7Ert661e     | 1.365187713 | 0.64163823 | 1.5503876  | 0.7286822 |
| A_55_P2229 | 99.7    | Detected | 64.9    | Detected | 79      | Detected | 136.1   | Detected   | Gm10452       | 1.365095286 | 0.79237713 | 2.09707242 | 1.2172573 |
| A_52_P3225 | 296.2   | Detected | 232.3   | Detected | 290.3   | Detected | 404.3   | Detected   | Mplkip        | 1.364956111 | 0.98008103 | 1.74042187 | 1.2496771 |
| A_55_P2142 | 95.1    | Detected | 126.4   | Detected | 111.8   | Detected | 129.8   | Detected   | K230010J24Rik | 1.364879075 | 1.17560463 | 1.02689873 | 0.8844937 |
| A_55_P1994 | 20382.5 | Detected | 19686.4 | Detected | 23417.1 | Detected | 27819.2 | Detected   | Golim4        | 1.364857108 | 1.14888262 | 1.41311769 | 1.1895065 |
| A_52_P4113 | 30.7    | Detected | 39.6    | Detected | 44.6    | Detected | 41.9    | Not Detect | Sptlc3        | 1.364820847 | 1.45276873 | 1.05808081 | 1.1262626 |
| A_66_P1334 | 20936.3 | Detected | 18588.2 | Detected | 21845.5 | Detected | 28571.6 | Detected   | Pdcd6ip       | 1.364691947 | 1.04342697 | 1.53708267 | 1.1752348 |
| A_55_P1969 | 43.6    | Detected | 36.4    | Detected | 44.4    | Detected | 59.5    | Detected   | Asb18         | 1.364678899 | 1.01834862 | 1.63461538 | 1.2197802 |
| A_55_P2112 | 698.6   | Detected | 868.1   | Detected | 655.9   | Detected | 953.3   | Detected   | Dab1          | 1.364586315 | 0.93887776 | 1.09814537 | 0.7555581 |
| A_66_P1207 | 9627    | Detected | 11546.6 | Detected | 11415.8 | Detected | 13135.7 | Detected   | Armc1         | 1.364464527 | 1.18581074 | 1.13762493 | 0.988672  |
| A_51_P4006 | 6291.7  | Detected | 11846.2 | Detected | 8466.4  | Detected | 8584.7  | Detected   | Bcap29        | 1.3644484   | 1.34564585 | 0.72467964 | 0.7146933 |
| A_52_P8056 | 1495.9  | Detected | 1954.2  | Detected | 1527.2  | Detected | 2040.9  | Detected   | Nbas          | 1.364329166 | 1.02092386 | 1.04436598 | 0.7814963 |
| A_51_P4511 | 5642.8  | Detected | 5355.2  | Detected | 2975.2  | Detected | 7698.5  | Detected   | Brca2         | 1.364304955 | 0.52725597 | 1.43757469 | 0.5555722 |
| A_55_P2247 | 2301.7  | Detected | 2782    | Detected | 2461.5  | Detected | 3140.1  | Detected   | 4931428A05Rik | 1.364252509 | 1.06942695 | 1.12872035 | 0.8847951 |
| A_55_P1993 | 126.3   | Detected | 158.5   | Detected | 126.2   | Detected | 172.3   | Detected   | LOC101055939  | 1.364212193 | 0.99920823 | 1.08706625 | 0.7962145 |
| A_55_P2089 | 3802.8  | Detected | 2962.3  | Detected | 3294.5  | Detected | 5187.8  | Detected   | Fam76a        | 1.364205322 | 0.86633533 | 1.75127435 | 1.1121426 |
| A_55_P1961 | 67      | Detected | 66.5    | Detected | 78.9    | Detected | 91.4    | Detected   | A930028N01Rik | 1.364179104 | 1.17761194 | 1.37443609 | 1.1864662 |
| A_52_P3039 | 7773.5  | Detected | 7960.9  | Detected | 7321    | Detected | 10602.5 | Detected   | Rab2a         | 1.363928732 | 0.94178941 | 1.33182178 | 0.9196196 |
| A_55_P2100 | 39.6    | Detected | 52.6    | Detected | 39.5    | Detected | 54      | Detected   | Gpha2         | 1.363636364 | 0.99747475 | 1.02661597 | 0.7509506 |
| A_51_P1171 | 2537.2  | Detected | 2544.5  | Detected | 4422.8  | Detected | 3459.7  | Detected   | Ilvbl         | 1.363589784 | 1.74318146 | 1.35967774 | 1.7381804 |
| A_55_P1960 | 770.5   | Detected | 737.7   | Detected | 645.3   | Detected | 1050.6  | Detected   | Ppp1r2        | 1.363530175 | 0.83750811 | 1.42415616 | 0.8747458 |
| A_52_P5520 | 895.4   | Detected | 798.3   | Detected | 783.1   | Detected | 1220.9  | Detected   | Adat1         | 1.363524682 | 0.87458119 | 1.52937492 | 0.9809595 |
| A_55_P1955 | 58.6    | Detected | 64.1    | Detected | 97.4    | Detected | 79.9    | Detected   | Aqp7          | 1.363481229 | 1.66211604 | 1.24648986 | 1.5195008 |

|            |         |          |         |            |         |          |         |            |               |             |            |            |           |
|------------|---------|----------|---------|------------|---------|----------|---------|------------|---------------|-------------|------------|------------|-----------|
| A_51_P2830 | 13158.4 | Detected | 16083   | Detected   | 16064.1 | Detected | 17941.1 | Detected   | Armc1         | 1.363471243 | 1.22082472 | 1.11553193 | 0.9988248 |
| A_55_P2122 | 4167.2  | Detected | 5810.6  | Detected   | 5004.4  | Detected | 5681.2  | Detected   | Arl1          | 1.363313496 | 1.20090228 | 0.97773035 | 0.8612536 |
| A_55_P2108 | 6652.8  | Detected | 6290.9  | Detected   | 8423    | Detected | 9069.8  | Detected   | Gnptab        | 1.363305676 | 1.26608345 | 1.4417333  | 1.3389181 |
| A_51_P2717 | 6734.7  | Detected | 5863.6  | Detected   | 7108    | Detected | 9181    | Detected   | Fundc1        | 1.363238155 | 1.05542934 | 1.56576165 | 1.2122246 |
| A_55_P2122 | 17573.1 | Detected | 22895.4 | Detected   | 20972.9 | Detected | 23956.3 | Detected   | Arl1          | 1.363236993 | 1.19346615 | 1.04633682 | 0.9160312 |
| A_55_P2073 | 254.7   | Detected | 286     | Detected   | 184.3   | Detected | 347.2   | Detected   | LOC101056104  | 1.36317236  | 0.72359639 | 1.21398601 | 0.6444056 |
| A_52_P8094 | 153.1   | Detected | 109.7   | Detected   | 105.3   | Detected | 208.7   | Detected   | Zfp36         | 1.363161332 | 0.68778576 | 1.90246126 | 0.9598906 |
| A_55_P2136 | 65176.6 | Detected | 60006.2 | Detected   | 86527.5 | Detected | 88839.9 | Detected   | Dazap2        | 1.363064351 | 1.32758536 | 1.48051201 | 1.441976  |
| A_55_P2183 | 381.4   | Detected | 524.6   | Detected   | 768.1   | Detected | 519.7   | Detected   | Rab30         | 1.362611432 | 2.01389617 | 0.99065955 | 1.4641632 |
| A_55_P2049 | 29.8    | Detected | 30.6    | Detected   | 35.5    | Detected | 40.6    | Not Detect | Apoa5         | 1.362416107 | 1.19127517 | 1.32679739 | 1.1601307 |
| A_55_P2107 | 3323.5  | Detected | 762.9   | Detected   | 580.6   | Detected | 4527.5  | Detected   | Galnt18       | 1.362268693 | 0.17469535 | 5.93459169 | 0.7610434 |
| A_55_P2059 | 10335.8 | Detected | 14616.5 | Detected   | 9738.2  | Detected | 14079.8 | Detected   | Smarca5       | 1.362236111 | 0.94218154 | 0.96328122 | 0.666247  |
| A_66_P1074 | 17.4    | Detected | 12.6    | Not Detect | 17.2    | Detected | 23.7    | Not Detect | A930035D04Rik | 1.362068966 | 0.98850575 | 1.88095238 | 1.3650794 |
| A_55_P1961 | 640.3   | Detected | 298.3   | Detected   | 1118.4  | Detected | 872.1   | Detected   | Npb           | 1.362017804 | 1.74668124 | 2.92356688 | 3.7492457 |
| A_55_P2123 | 1187.5  | Detected | 1132.7  | Detected   | 1770    | Detected | 1617.2  | Detected   | Thap6         | 1.361852632 | 1.49052632 | 1.42773903 | 1.5626379 |
| A_55_P2403 | 3288.5  | Detected | 3719.6  | Detected   | 3434.7  | Detected | 4478.4  | Detected   | BC037032      | 1.361836704 | 1.04445796 | 1.20400043 | 0.9234057 |
| A_55_P1965 | 69.4    | Detected | 78.1    | Detected   | 72.8    | Detected | 94.5    | Detected   | Zfp939        | 1.361671147 | 1.04899135 | 1.2099872  | 0.9321383 |
| A_55_P2039 | 137.7   | Detected | 168.4   | Detected   | 158.2   | Detected | 187.5   | Detected   | S100a2        | 1.361655773 | 1.14887436 | 1.11342043 | 0.9394299 |
| A_55_P2248 | 22.4    | Detected | 22.9    | Detected   | 23.2    | Detected | 30.5    | Not Detect | D030045P18Rik | 1.361607143 | 1.03571429 | 1.33187773 | 1.0131004 |
| A_52_P3383 | 114.5   | Detected | 146.6   | Detected   | 245.5   | Detected | 155.9   | Detected   | Lrrc27        | 1.361572052 | 2.1441048  | 1.06343793 | 1.6746248 |
| A_51_P5110 | 3726.2  | Detected | 4295    | Detected   | 5109.9  | Detected | 5073.4  | Detected   | Csgalnact2    | 1.361547958 | 1.37134346 | 1.18123399 | 1.1897322 |
| A_52_P2710 | 2422.7  | Detected | 2413.7  | Detected   | 2581.2  | Detected | 3298.1  | Detected   | Necap2        | 1.361332398 | 1.06542288 | 1.36640842 | 1.0693955 |
| A_55_P2015 | 430.1   | Detected | 474.4   | Detected   | 265.3   | Detected | 585.5   | Detected   | Ccdc19        | 1.361311323 | 0.61683329 | 1.23419056 | 0.5592327 |
| A_52_P4983 | 3026.7  | Detected | 4320.2  | Detected   | 3090.4  | Detected | 4119.1  | Detected   | Lymr4         | 1.360921135 | 1.02104602 | 0.95345123 | 0.7153373 |
| A_55_P1955 | 3610.1  | Detected | 2667.7  | Detected   | 3468.5  | Detected | 4912.5  | Detected   | Synj1         | 1.36076563  | 0.96077671 | 1.84147393 | 1.3001837 |
| A_55_P2062 | 255.4   | Detected | 233     | Detected   | 229.4   | Detected | 347.5   | Detected   | 1700027A15Rik | 1.360610807 | 0.8981989  | 1.49141631 | 0.9845494 |
| A_55_P2123 | 10741.3 | Detected | 5518.3  | Detected   | 11338.6 | Detected | 14613.3 | Detected   | Jam2          | 1.360477782 | 1.05560779 | 2.64815251 | 2.054727  |
| A_55_P2025 | 2070.7  | Detected | 2742.5  | Detected   | 3983.7  | Detected | 2816.9  | Detected   | Tst           | 1.360361231 | 1.92384218 | 1.02712853 | 1.4525798 |
| A_52_P2649 | 4633.7  | Detected | 5575.3  | Detected   | 5094.4  | Detected | 6303.2  | Detected   | Dnajc3        | 1.360295228 | 1.09942379 | 1.130558   | 0.9137446 |
| A_55_P2151 | 85.5    | Detected | 116.3   | Detected   | 120.3   | Detected | 116.3   | Detected   | C1qtnf7       | 1.360233918 | 1.40701754 | 1          | 1.0343938 |
| A_55_P2086 | 425.9   | Detected | 978.1   | Detected   | 309.2   | Detected | 579.3   | Detected   | Tspan33       | 1.360178446 | 0.72599202 | 0.59227073 | 0.3161231 |
| A_55_P2029 | 35010.8 | Detected | 40950.3 | Detected   | 37780.4 | Detected | 47620.8 | Detected   | Ndufs5        | 1.360174575 | 1.07910702 | 1.16289258 | 0.9225915 |
| A_55_P2059 | 1985.3  | Detected | 1437.4  | Detected   | 1877.4  | Detected | 2700    | Detected   | Stat2         | 1.35999597  | 0.94565053 | 1.87839154 | 1.3061083 |
| A_55_P1989 | 4526.6  | Detected | 4322.7  | Detected   | 5034.9  | Detected | 6156.1  | Detected   | Chfr          | 1.35998321  | 1.11229179 | 1.42413306 | 1.1647581 |
| A_51_P5163 | 6638.1  | Detected | 7043.9  | Detected   | 6702.1  | Detected | 9027.7  | Detected   | Vps11         | 1.359982525 | 1.00964131 | 1.28163375 | 0.9514757 |
| A_55_P2138 | 10293.6 | Detected | 11140.3 | Detected   | 8017.4  | Detected | 13998.8 | Detected   | Cc2d1a        | 1.359951815 | 0.77887231 | 1.25659094 | 0.7196754 |
| A_66_P1374 | 3266    | Detected | 2751.6  | Detected   | 3750.9  | Detected | 4441.2  | Detected   | Nsdhl         | 1.359828536 | 1.14846908 | 1.61404274 | 1.3631705 |
| A_55_P2046 | 21.4    | Detected | 27.6    | Detected   | 21.4    | Detected | 29.1    | Not Detect | Gm807         | 1.359813084 | 1          | 1.05434783 | 0.7753623 |
| A_55_P2006 | 37.8    | Detected | 36.1    | Detected   | 38.8    | Detected | 51.4    | Detected   | Eif4e2        | 1.35978836  | 1.02645503 | 1.42382271 | 1.0747922 |
| A_55_P1975 | 5998.4  | Detected | 4094.3  | Detected   | 6489.6  | Detected | 8156.2  | Detected   | Sipa113       | 1.359729261 | 1.0818885  | 1.99208656 | 1.5850329 |

|            |         |            |         |            |         |            |         |            |               |             |            |            |           |
|------------|---------|------------|---------|------------|---------|------------|---------|------------|---------------|-------------|------------|------------|-----------|
| A_55_P2117 | 5169.4  | Detected   | 5771.8  | Detected   | 4592.1  | Detected   | 7028.8  | Detected   | Mtmr1         | 1.359693581 | 0.8883236  | 1.21778301 | 0.7956097 |
| A_51_P2449 | 3219.5  | Detected   | 3256.6  | Detected   | 3724    | Detected   | 4377.5  | Detected   | Rmnd5b        | 1.359683181 | 1.15670135 | 1.34419333 | 1.1435239 |
| A_55_P1999 | 250.5   | Detected   | 230.1   | Detected   | 314.2   | Detected   | 340.6   | Detected   | Vmn1r217      | 1.359680639 | 1.25429142 | 1.48022599 | 1.3654933 |
| A_66_P1159 | 325.5   | Detected   | 340.5   | Detected   | 356.2   | Detected   | 442.5   | Detected   | 1700016H13Rik | 1.359447005 | 1.09431644 | 1.29955947 | 1.0461087 |
| A_51_P4054 | 148.3   | Detected   | 187.5   | Detected   | 164.3   | Detected   | 201.6   | Detected   | Fcer1g        | 1.359406608 | 1.10788941 | 1.0752     | 0.8762667 |
| A_55_P2130 | 8372.6  | Detected   | 10433.3 | Detected   | 10467.6 | Detected   | 11380.7 | Detected   | Armc1         | 1.359279077 | 1.25022096 | 1.0908054  | 1.0032876 |
| A_55_P2005 | 43.7    | Detected   | 61      | Detected   | 54.6    | Detected   | 59.4    | Detected   | Col9a1        | 1.359267735 | 1.24942792 | 0.97377049 | 0.895082  |
| A_55_P2016 | 27      | Detected   | 22.3    | Detected   | 32.3    | Detected   | 36.7    | Not Detect | Fbxo40        | 1.359259259 | 1.1962963  | 1.64573991 | 1.4484305 |
| A_51_P3326 | 5353.9  | Detected   | 7884.5  | Detected   | 5904.3  | Detected   | 7276.3  | Detected   | Top1mt        | 1.359065354 | 1.10280356 | 0.92286131 | 0.748849  |
| A_55_P2098 | 3070.9  | Detected   | 2590.3  | Detected   | 4343.1  | Detected   | 4173.5  | Detected   | Chmp6         | 1.359047836 | 1.41427595 | 1.61120334 | 1.6766784 |
| A_66_P1351 | 247.6   | Detected   | 264.5   | Detected   | 220.4   | Detected   | 336.5   | Detected   | Nfib          | 1.35904685  | 0.8901454  | 1.27221172 | 0.8332703 |
| A_55_P1966 | 41.5    | Detected   | 34.8    | Detected   | 47.4    | Detected   | 56.4    | Detected   | A930033H14Rik | 1.359036145 | 1.14216867 | 1.62068966 | 1.362069  |
| A_52_P2694 | 1413.5  | Detected   | 1302.7  | Detected   | 1021    | Detected   | 1920.7  | Detected   | Ddhd2         | 1.35882561  | 0.72232048 | 1.47439932 | 0.7837568 |
| A_55_P2279 | 53.8    | Detected   | 56.5    | Detected   | 74.9    | Detected   | 73.1    | Detected   | AW492981      | 1.358736059 | 1.39219331 | 1.29380531 | 1.3256637 |
| A_52_P2469 | 100.1   | Detected   | 95.6    | Detected   | 86      | Detected   | 136     | Detected   | 4930558C23Rik | 1.358641359 | 0.85914086 | 1.42259414 | 0.8995816 |
| A_55_P2017 | 14.5    | Not Detect | 16.4    | Not Detect | 22.2    | Detected   | 19.7    | Not Detect | Pde8b         | 1.35862069  | 1.53103448 | 1.20121951 | 1.3536585 |
| A_55_P2008 | 4288.2  | Detected   | 5018.9  | Detected   | 4510.7  | Detected   | 5826    | Detected   | Ap1g1         | 1.358612005 | 1.05188657 | 1.16081213 | 0.8987428 |
| A_51_P2285 | 145.6   | Detected   | 157.7   | Detected   | 147.2   | Detected   | 197.8   | Detected   | Tat           | 1.358516484 | 1.01098901 | 1.25428028 | 0.9334179 |
| A_55_P2168 | 386.7   | Detected   | 459.6   | Detected   | 438.2   | Detected   | 525.3   | Detected   | Relb          | 1.358417378 | 1.13317817 | 1.14295039 | 0.9534378 |
| A_55_P1970 | 2108.2  | Detected   | 2679    | Detected   | 2084.7  | Detected   | 2863.8  | Detected   | Vps54         | 1.358410018 | 0.98885305 | 1.06898096 | 0.7781635 |
| A_51_P4124 | 82.6    | Detected   | 98.8    | Detected   | 77.6    | Detected   | 112.2   | Detected   | Antxrl        | 1.358353511 | 0.93946731 | 1.13562753 | 0.7854251 |
| A_51_P1908 | 1820.9  | Detected   | 1664.1  | Detected   | 1837.4  | Detected   | 2473.4  | Detected   | Atp6v1b2      | 1.358339283 | 1.00906145 | 1.48632895 | 1.1041404 |
| A_51_P1044 | 85.4    | Detected   | 165.3   | Detected   | 40.8    | Detected   | 116     | Detected   | Magee1        | 1.358313817 | 0.47775176 | 0.70175439 | 0.246824  |
| A_52_P2111 | 398.3   | Detected   | 239.3   | Detected   | 516.6   | Detected   | 541     | Detected   | Mturn         | 1.358272659 | 1.2970123  | 2.26076055 | 2.1587965 |
| A_55_P2034 | 6574.2  | Detected   | 10224.8 | Detected   | 6656.4  | Detected   | 8929.5  | Detected   | Polr2c        | 1.358264123 | 1.01250342 | 0.87331782 | 0.6510054 |
| A_55_P2117 | 43      | Detected   | 55      | Detected   | 46.4    | Detected   | 58.4    | Detected   | Syt5          | 1.358139535 | 1.07906977 | 1.06181818 | 0.8436364 |
| A_52_P6003 | 7101.6  | Detected   | 6051.9  | Detected   | 8153.4  | Detected   | 9643.6  | Detected   | Scamp2        | 1.357947505 | 1.14810747 | 1.59348304 | 1.3472463 |
| A_52_P5649 | 645.4   | Detected   | 523.3   | Detected   | 723.4   | Detected   | 876.4   | Detected   | C2cd3         | 1.35791757  | 1.12085528 | 1.67475635 | 1.382381  |
| A_51_P1230 | 5189.1  | Detected   | 4590.7  | Detected   | 6860.5  | Detected   | 7046.3  | Detected   | Gmcl1         | 1.357904068 | 1.32209824 | 1.53490753 | 1.4944344 |
| A_52_P9484 | 1460.2  | Detected   | 952.7   | Detected   | 1685.3  | Detected   | 1982.7  | Detected   | Nicn1         | 1.357827695 | 1.15415696 | 2.08113782 | 1.7689724 |
| A_52_P6460 | 1894.1  | Detected   | 1676.2  | Detected   | 1986.4  | Detected   | 2571.8  | Detected   | Nfatc2ip      | 1.357795259 | 1.04873027 | 1.53430378 | 1.1850614 |
| A_55_P2101 | 37448.8 | Detected   | 47988.9 | Detected   | 43271.7 | Detected   | 50847.4 | Detected   | Rpl13a        | 1.357784495 | 1.15548963 | 1.05956586 | 0.9017023 |
| A_51_P4819 | 33183.7 | Detected   | 36787.5 | Detected   | 34007.7 | Detected   | 45055.6 | Detected   | Ccna2         | 1.357762998 | 1.02483147 | 1.22475297 | 0.9244363 |
| A_55_P2090 | 1455.4  | Detected   | 1067.5  | Detected   | 1651.9  | Detected   | 1976    | Detected   | Macrod2       | 1.35770235  | 1.13501443 | 1.85105386 | 1.5474473 |
| A_55_P2086 | 15854.2 | Detected   | 16740.7 | Detected   | 12395.9 | Detected   | 21524.9 | Detected   | Nfib          | 1.357678092 | 0.78186853 | 1.28578255 | 0.7404649 |
| A_51_P2673 | 77.2    | Detected   | 113.9   | Detected   | 135.9   | Detected   | 104.8   | Detected   | Tbc1d10c      | 1.357512953 | 1.76036269 | 0.92010536 | 1.1931519 |
| A_55_P2020 | 1759.3  | Detected   | 1959.5  | Detected   | 1526.9  | Detected   | 2388.2  | Detected   | Slc39a3       | 1.357471722 | 0.86790201 | 1.2187803  | 0.7792294 |
| A_55_P2062 | 475.6   | Detected   | 475.4   | Detected   | 375.1   | Detected   | 645.6   | Detected   | D430041D05Rik | 1.35744323  | 0.78868797 | 1.3580143  | 0.7890198 |
| A_52_P1530 | 29.1    | Detected   | 18.8    | Detected   | 8.4     | Not Detect | 39.5    | Not Detect | Hoxb2         | 1.357388316 | 0.28865979 | 2.10106383 | 0.4468085 |
| A_55_P2014 | 12296.4 | Detected   | 9984.7  | Detected   | 19957.3 | Detected   | 16690.1 | Detected   | Ccdc12        | 1.357315962 | 1.62301975 | 1.6715675  | 1.9987881 |

|            |         |            |         |            |         |          |         |            |               |             |            |            |           |
|------------|---------|------------|---------|------------|---------|----------|---------|------------|---------------|-------------|------------|------------|-----------|
| A_66_P1192 | 31903.8 | Detected   | 29812.8 | Detected   | 25397.4 | Detected | 43302.7 | Detected   | Gatad1        | 1.357289727 | 0.79606191 | 1.45248685 | 0.8518958 |
| A_55_P2054 | 7188.6  | Detected   | 8403.3  | Detected   | 8465    | Detected | 9756.8  | Detected   | Adprm         | 1.357260106 | 1.17755891 | 1.16106768 | 1.0073424 |
| A_55_P2398 | 306.8   | Detected   | 296.4   | Detected   | 296.7   | Detected | 416.4   | Detected   | Lelp1         | 1.357235984 | 0.96707953 | 1.4048583  | 1.0010121 |
| A_55_P1985 | 92.1    | Detected   | 85.5    | Detected   | 83      | Detected | 125     | Detected   | Susd3         | 1.357220413 | 0.90119435 | 1.4619883  | 0.9707602 |
| A_55_P2173 | 7       | Not Detect | 6.9     | Not Detect | 33.1    | Detected | 9.5     | Not Detect | Galnt15       | 1.357142857 | 4.72857143 | 1.37681159 | 4.7971014 |
| A_55_P2127 | 54.6    | Detected   | 57.3    | Detected   | 46.9    | Detected | 74.1    | Detected   | Gm9868        | 1.357142857 | 0.85897436 | 1.29319372 | 0.8184991 |
| A_55_P2122 | 876.8   | Detected   | 820.1   | Detected   | 746.3   | Detected | 1189.9  | Detected   | Cym           | 1.357093978 | 0.85116332 | 1.45092062 | 0.910011  |
| A_55_P1958 | 1545.7  | Detected   | 1225.9  | Detected   | 1523.2  | Detected | 2097.6  | Detected   | Nipsnap3b     | 1.357055056 | 0.98544349 | 1.71106942 | 1.2425157 |
| A_55_P1980 | 1757    | Detected   | 2611.4  | Detected   | 2018.1  | Detected | 2384.3  | Detected   | Ankrd24       | 1.357029027 | 1.14860558 | 0.91303515 | 0.7728039 |
| A_55_P2078 | 7315.6  | Detected   | 6507.7  | Detected   | 7171.3  | Detected | 9927.3  | Detected   | Tpm1          | 1.35700421  | 0.98027503 | 1.52546983 | 1.1019715 |
| A_55_P2139 | 20397.7 | Detected   | 21252.9 | Detected   | 23708.1 | Detected | 27679.5 | Detected   | Ilk           | 1.356991229 | 1.16229281 | 1.30238697 | 1.1155231 |
| A_55_P2087 | 39.5    | Detected   | 41.7    | Detected   | 30.9    | Detected | 53.6    | Detected   | Ppp6r2        | 1.356962025 | 0.78227848 | 1.2853717  | 0.7410072 |
| A_51_P4729 | 53658.3 | Detected   | 52325.5 | Detected   | 70771.9 | Detected | 72812.2 | Detected   | Slc3a2        | 1.356960619 | 1.31893668 | 1.39152421 | 1.3525317 |
| A_66_P1259 | 38.1    | Detected   | 21.2    | Detected   | 35.6    | Detected | 51.7    | Not Detect | 2500004C02Rik | 1.356955381 | 0.9343832  | 2.43867925 | 1.6792453 |
| A_55_P2006 | 31334.1 | Detected   | 30760.9 | Detected   | 34219.5 | Detected | 42517.1 | Detected   | Ogdh          | 1.356895523 | 1.09208498 | 1.38217998 | 1.1124349 |
| A_51_P2405 | 26.9    | Detected   | 27.7    | Detected   | 26.5    | Detected | 36.5    | Not Detect | Olfr578       | 1.356877323 | 0.98513011 | 1.31768953 | 0.9566787 |
| A_51_P1504 | 65.3    | Detected   | 75.1    | Detected   | 61.1    | Detected | 88.6    | Detected   | Gsdmc         | 1.356814701 | 0.93568147 | 1.17976032 | 0.8135819 |
| A_55_P1967 | 3991.2  | Detected   | 4242.3  | Detected   | 4226.9  | Detected | 5414.6  | Detected   | Tas2r109      | 1.356634596 | 1.05905492 | 1.27633595 | 0.9963699 |
| A_51_P4505 | 28871.2 | Detected   | 41351.1 | Detected   | 23954   | Detected | 39164.6 | Detected   | 2700029M09Rik | 1.356528305 | 0.82968495 | 0.94712353 | 0.5792833 |
| A_52_P2076 | 1357.2  | Detected   | 1454.1  | Detected   | 1490.6  | Detected | 1841    | Detected   | Zfc3h1        | 1.356469201 | 1.0982906  | 1.26607524 | 1.0251014 |
| A_51_P2569 | 1093.3  | Detected   | 1118.2  | Detected   | 1121.7  | Detected | 1483    | Detected   | Ankmy2        | 1.356443794 | 1.0259764  | 1.3262386  | 1.00313   |
| A_66_P1103 | 1183.1  | Detected   | 982.8   | Detected   | 1281.6  | Detected | 1604.7  | Detected   | Snx10         | 1.356351957 | 1.08325585 | 1.63278388 | 1.3040293 |
| A_55_P2186 | 162.2   | Detected   | 173.4   | Detected   | 162.8   | Detected | 220     | Detected   | Ablim2        | 1.356350185 | 1.00369914 | 1.26874279 | 0.9388697 |
| A_66_P1346 | 3094.9  | Detected   | 2469.6  | Detected   | 4548.6  | Detected | 4197.2  | Detected   | Far1          | 1.356166597 | 1.46970823 | 1.69954649 | 1.8418367 |
| A_55_P2004 | 150.5   | Detected   | 151.4   | Detected   | 186.7   | Detected | 204.1   | Detected   | BC025920      | 1.356146179 | 1.24053156 | 1.34808454 | 1.2331572 |
| A_55_P2118 | 23080.9 | Detected   | 29582.8 | Detected   | 25027.4 | Detected | 31297.4 | Detected   | Tnip1         | 1.355986985 | 1.0843338  | 1.05795935 | 0.8460119 |
| A_55_P2122 | 3725.7  | Detected   | 4151.4  | Detected   | 3355.4  | Detected | 5051.9  | Detected   | Dlx3          | 1.355959954 | 0.90060928 | 1.21691478 | 0.8082575 |
| A_52_P1853 | 1870.8  | Detected   | 1786.5  | Detected   | 2653.2  | Detected | 2536.7  | Detected   | Gna13         | 1.355943981 | 1.41821681 | 1.41992723 | 1.4851385 |
| A_55_P2160 | 97.8    | Detected   | 57      | Detected   | 97.1    | Detected | 132.6   | Detected   | 6720475J19Rik | 1.355828221 | 0.99284254 | 2.32631579 | 1.7035088 |
| A_51_P3547 | 3756.8  | Detected   | 3014.7  | Detected   | 5184.4  | Detected | 5092.9  | Detected   | Cox15         | 1.355648424 | 1.38000426 | 1.68935549 | 1.7197068 |
| A_55_P2251 | 18      | Detected   | 16      | Detected   | 18.8    | Detected | 24.4    | Not Detect | 2900076A13Rik | 1.355555556 | 1.04444444 | 1.525      | 1.175     |
| A_55_P1991 | 2886.5  | Detected   | 4327.8  | Detected   | 2928.9  | Detected | 3912.8  | Detected   | Milr1         | 1.355551706 | 1.01468907 | 0.90410832 | 0.6767642 |
| A_52_P4640 | 308     | Detected   | 343.6   | Detected   | 534.7   | Detected | 417.5   | Detected   | Hdac8         | 1.355519481 | 1.73603896 | 1.21507567 | 1.55617   |
| A_55_P2062 | 68.1    | Detected   | 71.2    | Detected   | 77.6    | Detected | 92.3    | Detected   | Mag           | 1.355359765 | 1.13950073 | 1.29634831 | 1.0898876 |
| A_51_P4388 | 1071.6  | Detected   | 1162.3  | Detected   | 885.6   | Detected | 1452.4  | Detected   | Pycard        | 1.355356476 | 0.82642777 | 1.24959133 | 0.7619375 |
| A_51_P1484 | 2573    | Detected   | 2659.7  | Detected   | 2827.1  | Detected | 3487.3  | Detected   | Rnft1         | 1.355343956 | 1.09875632 | 1.31116291 | 1.0629394 |
| A_55_P1996 | 29270.6 | Detected   | 39641.7 | Detected   | 27753.1 | Detected | 39668.1 | Detected   | Ttc13         | 1.355219913 | 0.94815617 | 1.00066597 | 0.7000986 |
| A_55_P2177 | 36.6    | Detected   | 41.8    | Detected   | 30.6    | Detected | 49.6    | Detected   | Atp6v0a1      | 1.355191257 | 0.83606557 | 1.18660287 | 0.7320574 |
| A_55_P2067 | 5972.9  | Detected   | 8504.9  | Detected   | 5607.2  | Detected | 8094.3  | Detected   | Fam179b       | 1.355170855 | 0.93877346 | 0.95172195 | 0.6592905 |
| A_55_P2301 | 27.6    | Detected   | 38.3    | Detected   | 36.2    | Detected | 37.4    | Not Detect | 9430062P05Rik | 1.355072464 | 1.3115942  | 0.97650131 | 0.9451697 |

|            |         |            |         |          |         |            |          |            |               |             |            |            |           |
|------------|---------|------------|---------|----------|---------|------------|----------|------------|---------------|-------------|------------|------------|-----------|
| A_52_P6635 | 860.2   | Detected   | 1072.6  | Detected | 1182    | Detected   | 1165.6   | Detected   | 10-Sep        | 1.355033713 | 1.37409905 | 1.0867052  | 1.1019952 |
| A_55_P2038 | 35.5    | Detected   | 26.3    | Detected | 26      | Detected   | 48.1     | Detected   | Acot3         | 1.354929577 | 0.73239437 | 1.82889734 | 0.9885932 |
| A_52_P8163 | 558.4   | Detected   | 507.8   | Detected | 823.7   | Detected   | 756.5    | Detected   | 2810001G20Rik | 1.35476361  | 1.47510745 | 1.48975975 | 1.6220953 |
| A_55_P1982 | 15975.2 | Detected   | 15479.2 | Detected | 16627.5 | Detected   | 21638.3  | Detected   | Nadk          | 1.354493214 | 1.04083204 | 1.39789524 | 1.0741834 |
| A_55_P2160 | 274.2   | Detected   | 331.7   | Detected | 279     | Detected   | 371.4    | Detected   | Tfcp2         | 1.354485777 | 1.01750547 | 1.11968646 | 0.8411215 |
| A_55_P2099 | 409.1   | Detected   | 644.6   | Detected | 443.7   | Detected   | 554.1    | Detected   | Rhobtb1       | 1.354436568 | 1.0845759  | 0.85960285 | 0.6883339 |
| A_55_P1984 | 16233.6 | Detected   | 21164   | Detected | 14395.3 | Detected   | 21986.8  | Detected   | Rsph3b        | 1.354400749 | 0.88675956 | 1.03887734 | 0.6801786 |
| A_66_P1284 | 3375.3  | Detected   | 3087.2  | Detected | 3115.2  | Detected   | 4571.4   | Detected   | BB094273      | 1.354368501 | 0.92294018 | 1.48075926 | 1.0090697 |
| A_55_P2079 | 67008.4 | Detected   | 66522.9 | Detected | 99085.7 | Detected   | 90743.4  | Detected   | Ndufv1        | 1.354209323 | 1.47870565 | 1.36409267 | 1.4894976 |
| A_55_P2133 | 24.3    | Detected   | 49.3    | Detected | 22.2    | Detected   | 32.9     | Not Detect | Pop5          | 1.353909465 | 0.91358025 | 0.6673428  | 0.4503043 |
| A_55_P2058 | 72.9    | Detected   | 156     | Detected | 92.6    | Detected   | 98.7     | Detected   | Gm4419        | 1.353909465 | 1.2702332  | 0.63269231 | 0.5935897 |
| A_66_P1245 | 3859.4  | Detected   | 1751    | Detected | 4059.4  | Detected   | 5225.1   | Detected   | Akap13        | 1.353863295 | 1.05182153 | 2.98406625 | 2.3183324 |
| A_55_P2130 | 128.3   | Detected   | 133     | Detected | 136.7   | Detected   | 173.7    | Detected   | Zfp599        | 1.353858145 | 1.06547155 | 1.30601504 | 1.0278195 |
| A_51_P2240 | 23.2    | Detected   | 17.6    | Detected | 36.4    | Detected   | 31.4     | Not Detect | Klhl38        | 1.353448276 | 1.56896552 | 1.78409091 | 2.0681818 |
| A_52_P1373 | 175.2   | Detected   | 71.9    | Detected | 3.4     | Not Detect | 237.1    | Detected   | Prkaa2        | 1.353310502 | 0.01940639 | 3.29763561 | 0.0472879 |
| A_55_P2362 | 50.1    | Detected   | 47.1    | Detected | 43.5    | Detected   | 67.8     | Detected   | D4Ert681e     | 1.353293413 | 0.86826347 | 1.43949045 | 0.9235669 |
| A_55_P2011 | 208.4   | Detected   | 156.3   | Detected | 255.3   | Detected   | 282      | Detected   | Tead1         | 1.353166987 | 1.22504798 | 1.80422265 | 1.6333973 |
| A_55_P2146 | 132.8   | Detected   | 104.8   | Detected | 149     | Detected   | 179.7    | Detected   | Gm13178       | 1.353162651 | 1.12198795 | 1.71469466 | 1.4217557 |
| A_66_P1060 | 35.4    | Detected   | 26.9    | Detected | 35.3    | Detected   | 47.9     | Detected   | Gm4906        | 1.353107345 | 0.99717514 | 1.78066914 | 1.3122677 |
| A_51_P3872 | 7371.6  | Detected   | 7406.9  | Detected | 8346.2  | Detected   | 9974.2   | Detected   | Nampt         | 1.353057681 | 1.1322101  | 1.34660924 | 1.1268142 |
| A_51_P3006 | 1791.6  | Detected   | 1516.1  | Detected | 2012    | Detected   | 2424     | Detected   | Tbccd1        | 1.352980576 | 1.12301853 | 1.59883913 | 1.3270892 |
| A_55_P2287 | 326.6   | Detected   | 234.6   | Detected | 340     | Detected   | 441.8    | Detected   | AI415730      | 1.352725046 | 1.04102878 | 1.88320546 | 1.4492754 |
| A_55_P2169 | 41.7    | Detected   | 42.4    | Detected | 43.3    | Detected   | 56.4     | Detected   | Mfsd6         | 1.352517986 | 1.0383693  | 1.33018868 | 1.0212264 |
| A_55_P2053 | 78239.6 | Detected   | 73874   | Detected | 88276.1 | Detected   | 105818.4 | Detected   | Scamp3        | 1.352491577 | 1.12827903 | 1.43241736 | 1.1949549 |
| A_52_P4385 | 88.8    | Detected   | 116.4   | Detected | 80.1    | Detected   | 120.1    | Detected   | Fubp1         | 1.352477477 | 0.90202703 | 1.03178694 | 0.6881443 |
| A_55_P2176 | 99.3    | Detected   | 119.3   | Detected | 111.3   | Detected   | 134.3    | Detected   | D830039M14Rik | 1.352467271 | 1.12084592 | 1.12573345 | 0.9329422 |
| A_55_P1952 | 24.4    | Detected   | 27      | Detected | 23.5    | Detected   | 33       | Not Detect | Olf51         | 1.352459016 | 0.96311475 | 1.22222222 | 0.8703704 |
| A_51_P3627 | 1485.2  | Detected   | 1480.1  | Detected | 1772.3  | Detected   | 2008.6   | Detected   | Dusp18        | 1.35241045  | 1.1933073  | 1.35707047 | 1.1974191 |
| A_52_P5589 | 147     | Detected   | 220.9   | Detected | 387.8   | Detected   | 198.8    | Detected   | Gpr155        | 1.352380952 | 2.63809524 | 0.89995473 | 1.7555455 |
| A_51_P4667 | 365.8   | Detected   | 289.9   | Detected | 307.6   | Detected   | 494.7    | Detected   | Zfp646        | 1.352378349 | 0.84089666 | 1.7064505  | 1.0610555 |
| A_51_P2342 | 105.3   | Detected   | 110.4   | Detected | 111.1   | Detected   | 142.4    | Detected   | Adam6b        | 1.352326686 | 1.05508072 | 1.28985507 | 1.0063406 |
| A_51_P1690 | 26793.9 | Detected   | 35870.4 | Detected | 28161.8 | Detected   | 36231.1  | Detected   | 2810004N23Rik | 1.352214497 | 1.05105266 | 1.01005564 | 0.7850986 |
| A_55_P2091 | 5648.4  | Detected   | 5540.3  | Detected | 9032.5  | Detected   | 7637.4   | Detected   | Tmem219       | 1.352135118 | 1.59912542 | 1.37851741 | 1.6303269 |
| A_55_P2015 | 237.8   | Detected   | 259     | Detected | 247.2   | Detected   | 321.4    | Detected   | Hhat          | 1.351555929 | 1.03952902 | 1.24092664 | 0.9544402 |
| A_52_P2463 | 2682.4  | Detected   | 3633    | Detected | 2937.6  | Detected   | 3625.4   | Detected   | Azin1         | 1.35155085  | 1.09513868 | 0.99790806 | 0.8085879 |
| A_55_P2133 | 951.5   | Detected   | 902.6   | Detected | 1032.8  | Detected   | 1286     | Detected   | Nbr1          | 1.351550184 | 1.08544404 | 1.42477288 | 1.1442499 |
| A_55_P2325 | 728.1   | Detected   | 491.1   | Detected | 919.1   | Detected   | 984      | Detected   | Pura          | 1.351462711 | 1.2623266  | 2.00366524 | 1.8715129 |
| A_52_P2449 | 1681.9  | Detected   | 2318.1  | Detected | 885.8   | Detected   | 2273     | Detected   | Akap11        | 1.351447767 | 0.52666627 | 0.98054441 | 0.3821233 |
| A_55_P2106 | 910.1   | Detected   | 943.2   | Detected | 2208.3  | Detected   | 1229.9   | Detected   | Nkain4        | 1.351389957 | 2.42643666 | 1.30396522 | 2.341285  |
| A_51_P3171 | 7.4     | Not Detect | 26.7    | Detected | 3.6     | Not Detect | 10       | Not Detect | Csf3          | 1.351351351 | 0.48648649 | 0.37453184 | 0.1348315 |

|            |          |            |          |            |         |            |          |            |               |             |            |            |           |
|------------|----------|------------|----------|------------|---------|------------|----------|------------|---------------|-------------|------------|------------|-----------|
| A_51_P2476 | 165.7    | Detected   | 174.9    | Detected   | 190.4   | Detected   | 223.9    | Detected   | 6330419J24Rik | 1.351237176 | 1.14906457 | 1.28016009 | 1.0886221 |
| A_51_P2417 | 428.5    | Detected   | 608.6    | Detected   | 392.7   | Detected   | 579      | Detected   | Mlf1ip        | 1.351225204 | 0.91645274 | 0.95136379 | 0.6452514 |
| A_55_P2019 | 2900.8   | Detected   | 2943.5   | Detected   | 2482.9  | Detected   | 3919.3   | Detected   | Klhl17        | 1.351110039 | 0.85593629 | 1.33151011 | 0.8435196 |
| A_52_P4670 | 181.2    | Detected   | 211.6    | Detected   | 192.9   | Detected   | 244.8    | Detected   | Tmem33        | 1.350993377 | 1.06456954 | 1.15689981 | 0.9116257 |
| A_52_P1447 | 315.7    | Detected   | 244.1    | Detected   | 323.1   | Detected   | 426.5    | Detected   | Tceanc2       | 1.350966107 | 1.02343997 | 1.74723474 | 1.3236379 |
| A_51_P3689 | 35222    | Detected   | 26875.6  | Detected   | 43971   | Detected   | 47582    | Detected   | Anapc13       | 1.35091704  | 1.24839589 | 1.7704535  | 1.6360937 |
| A_51_P2517 | 3499.6   | Detected   | 5635.9   | Detected   | 3987.4  | Detected   | 4727.6   | Detected   | Reep5         | 1.350897245 | 1.13938736 | 0.83883674 | 0.7075001 |
| A_52_P1958 | 5408.3   | Detected   | 4682.3   | Detected   | 7238.2  | Detected   | 7305.6   | Detected   | Ctsc          | 1.35081264  | 1.33835031 | 1.56025885 | 1.5458642 |
| A_55_P2098 | 15264.5  | Detected   | 20812.2  | Detected   | 19055.1 | Detected   | 20617.9  | Detected   | Btg1          | 1.350709162 | 1.24832782 | 0.99066413 | 0.9155736 |
| A_52_P3151 | 3431.1   | Detected   | 3591.6   | Detected   | 3050.6  | Detected   | 4634.2   | Detected   | Pdx1          | 1.350645566 | 0.88910262 | 1.29028845 | 0.8493708 |
| A_55_P1979 | 10992.1  | Detected   | 12089.7  | Detected   | 15072.9 | Detected   | 14845.2  | Detected   | Glod4         | 1.350533565 | 1.37124844 | 1.22792129 | 1.2467555 |
| A_55_P2067 | 226      | Detected   | 287.4    | Detected   | 225.1   | Detected   | 305.2    | Detected   | Fam179b       | 1.350442478 | 0.9960177  | 1.06193459 | 0.7832289 |
| A_51_P2024 | 100470.8 | Detected   | 110750.1 | Detected   | 99236   | Detected   | 135679.6 | Detected   | Pdap1         | 1.350438137 | 0.98770986 | 1.22509686 | 0.8960353 |
| A_55_P2025 | 159.8    | Detected   | 185.3    | Detected   | 185.9   | Detected   | 215.8    | Detected   | Dnah8         | 1.350438048 | 1.16332916 | 1.16459795 | 1.003238  |
| A_55_P2029 | 2036.1   | Detected   | 2097.7   | Detected   | 1814    | Detected   | 2749.6   | Detected   | Zfp57         | 1.350424832 | 0.89091891 | 1.31076894 | 0.8647566 |
| A_51_P3482 | 796.8    | Detected   | 689.7    | Detected   | 820.9   | Detected   | 1076     | Detected   | Stoml1        | 1.350401606 | 1.03024598 | 1.56009859 | 1.1902276 |
| A_55_P2090 | 74574.6  | Detected   | 94201.5  | Detected   | 70147.6 | Detected   | 100704.5 | Detected   | Ebna1bp2      | 1.350386056 | 0.94063662 | 1.06903287 | 0.7446548 |
| A_52_P5672 | 29.4     | Detected   | 22.7     | Detected   | 14.9    | Not Detect | 39.7     | Not Detect | Cyp2w1        | 1.350340136 | 0.50680272 | 1.74889868 | 0.6563877 |
| A_55_P1952 | 7384.6   | Detected   | 7491.9   | Detected   | 7601.9  | Detected   | 9971.7   | Detected   | Tm2d1         | 1.350337188 | 1.0294261  | 1.33099748 | 1.0146825 |
| A_65_P0217 | 390.8    | Detected   | 218.1    | Detected   | 937.4   | Detected   | 527.7    | Detected   | Gstm4         | 1.350307062 | 2.3986694  | 2.41953232 | 4.2980284 |
| A_66_P1162 | 98.2     | Detected   | 115.4    | Detected   | 130.7   | Detected   | 132.6    | Detected   | Tdg           | 1.350305499 | 1.33095723 | 1.14904679 | 1.1325823 |
| A_55_P2069 | 19567.9  | Detected   | 22508.9  | Detected   | 27238.2 | Detected   | 26421.9  | Detected   | Ormdl2        | 1.35026753  | 1.39198381 | 1.17384235 | 1.210108  |
| A_55_P2099 | 24428.4  | Detected   | 18454.9  | Detected   | 32173.9 | Detected   | 32983.9  | Detected   | Cars          | 1.350227604 | 1.31706948 | 1.78727059 | 1.7433798 |
| A_55_P2052 | 455.2    | Detected   | 400.7    | Detected   | 411.9   | Detected   | 614.6    | Detected   | Ip6k2         | 1.350175747 | 0.90487698 | 1.53381582 | 1.0279511 |
| A_51_P3804 | 3590.1   | Detected   | 4424.7   | Detected   | 3312    | Detected   | 4846.1   | Detected   | Cars2         | 1.349850979 | 0.92253698 | 1.0952381  | 0.7485253 |
| A_55_P2098 | 32461.5  | Detected   | 35046.8  | Detected   | 37597   | Detected   | 43815.1  | Detected   | Slc39a1       | 1.349755865 | 1.15820279 | 1.25018832 | 1.0727656 |
| A_51_P1486 | 820.9    | Detected   | 897.4    | Detected   | 1465.9  | Detected   | 1108     | Detected   | Cox7a1        | 1.349738092 | 1.78572299 | 1.23467796 | 1.6334968 |
| A_52_P4968 | 2001     | Detected   | 2287.1   | Detected   | 2748    | Detected   | 2700.7   | Detected   | 2310011J03Rik | 1.349675162 | 1.37331334 | 1.18084037 | 1.2015216 |
| A_55_P2030 | 153      | Detected   | 170      | Detected   | 154.6   | Detected   | 206.5    | Detected   | Ifnab         | 1.349673203 | 1.01045752 | 1.21470588 | 0.9094118 |
| A_51_P2869 | 502.3    | Detected   | 562      | Detected   | 741.8   | Detected   | 677.9    | Detected   | 3110001I22Rik | 1.349591877 | 1.47680669 | 1.20622776 | 1.3199288 |
| A_52_P8224 | 15435.1  | Detected   | 14899.5  | Detected   | 25170.9 | Detected   | 20829.4  | Detected   | Cycs          | 1.349482673 | 1.63075717 | 1.39799322 | 1.6893788 |
| A_55_P1962 | 25.2     | Detected   | 11.3     | Not Detect | 31.8    | Detected   | 34       | Not Detect | Klhl24        | 1.349206349 | 1.26190476 | 3.00884956 | 2.8141593 |
| A_52_P4123 | 2427.2   | Detected   | 2910.3   | Detected   | 3026    | Detected   | 3274.6   | Detected   | Pcgf6         | 1.349126566 | 1.24670402 | 1.1251761  | 1.0397554 |
| A_51_P1933 | 2164     | Detected   | 2473.9   | Detected   | 2623.3  | Detected   | 2919.4   | Detected   | Nucb2         | 1.349075786 | 1.21224584 | 1.18008004 | 1.0603905 |
| A_66_P1000 | 2433.7   | Detected   | 2682.3   | Detected   | 2933.6  | Detected   | 3283.2   | Detected   | 1810043H04Rik | 1.349056991 | 1.2054074  | 1.22402416 | 1.0936883 |
| A_51_P1409 | 24170.8  | Detected   | 23069.1  | Detected   | 29059.5 | Detected   | 32606.5  | Detected   | Rp9           | 1.349003757 | 1.20225644 | 1.41342749 | 1.259672  |
| A_52_P4206 | 14.9     | Not Detect | 29.1     | Detected   | 5.3     | Not Detect | 20.1     | Not Detect | Prokr1        | 1.348993289 | 0.3557047  | 0.69072165 | 0.1821306 |
| A_51_P3172 | 1320.5   | Detected   | 1765.4   | Detected   | 1030.2  | Detected   | 1781.1   | Detected   | Cmtm2a        | 1.34880727  | 0.78015903 | 1.00889317 | 0.5835505 |
| A_55_P2108 | 63439.8  | Detected   | 91037.6  | Detected   | 84644.2 | Detected   | 85558.7  | Detected   | Gm8709        | 1.348659674 | 1.33424443 | 0.93981717 | 0.9297719 |
| A_55_P2345 | 39.3     | Detected   | 44.3     | Detected   | 30.6    | Detected   | 53       | Detected   | N4bp2I1       | 1.348600509 | 0.77862595 | 1.19638826 | 0.6907449 |

|            |          |            |          |            |          |          |          |            |               |             |            |            |           |
|------------|----------|------------|----------|------------|----------|----------|----------|------------|---------------|-------------|------------|------------|-----------|
| A_55_P1973 | 1886.4   | Detected   | 1914.4   | Detected   | 2024.3   | Detected | 2544     | Detected   | Sema4b        | 1.348600509 | 1.07310221 | 1.32887589 | 1.057407  |
| A_55_P2161 | 1173.8   | Detected   | 970.6    | Detected   | 2024     | Detected | 1582.9   | Detected   | Smim15        | 1.348526154 | 1.72431419 | 1.6308469  | 2.0853081 |
| A_55_P2034 | 13819.9  | Detected   | 14993.9  | Detected   | 12729.4  | Detected | 18636.3  | Detected   | Cdk8          | 1.348511928 | 0.92109205 | 1.24292546 | 0.8489719 |
| A_51_P1149 | 342.9    | Detected   | 338.9    | Detected   | 260.6    | Detected | 462.4    | Detected   | Prss37        | 1.348498104 | 0.75998833 | 1.36441428 | 0.7689584 |
| A_55_P2134 | 1099.7   | Detected   | 1220.9   | Detected   | 1448.7   | Detected | 1482.9   | Detected   | Fdxacb1       | 1.348458671 | 1.31735928 | 1.21459579 | 1.1865837 |
| A_55_P2042 | 140639.7 | Detected   | 162115.4 | Detected   | 136991.8 | Detected | 189639   | Detected   | Aoc2          | 1.348403047 | 0.97406209 | 1.16977782 | 0.8450264 |
| A_51_P1756 | 250.6    | Detected   | 243      | Detected   | 227.5    | Detected | 337.9    | Detected   | Lpo           | 1.348363927 | 0.90782123 | 1.39053498 | 0.936214  |
| A_55_P1968 | 2803.4   | Detected   | 3132.7   | Detected   | 3296.8   | Detected | 3779.9   | Detected   | Rbm25         | 1.348327031 | 1.17600057 | 1.20659495 | 1.0523829 |
| A_51_P1024 | 98.8     | Detected   | 3.1      | Not Detect | 1028.5   | Detected | 133.2    | Detected   | Ugt2b36       | 1.348178138 | 10.409919  | 42.9677419 | 331.77419 |
| A_55_P1994 | 61688.6  | Detected   | 91650.3  | Detected   | 82565.9  | Detected | 83166.4  | Detected   | Gapdh         | 1.348164815 | 1.33843044 | 0.90743184 | 0.9008798 |
| A_51_P2956 | 25287.2  | Detected   | 30908.1  | Detected   | 35160.1  | Detected | 34090.1  | Detected   | Arf4          | 1.348116834 | 1.39043073 | 1.10295036 | 1.1375691 |
| A_55_P2046 | 1202.8   | Detected   | 1413.3   | Detected   | 1452.1   | Detected | 1621.5   | Detected   | Eogt          | 1.348104423 | 1.20726638 | 1.1473148  | 1.0274535 |
| A_51_P5043 | 311.2    | Detected   | 150.8    | Detected   | 346.3    | Detected | 419.5    | Detected   | Nrarp         | 1.348007712 | 1.1127892  | 2.78183024 | 2.2964191 |
| A_51_P4832 | 4698.2   | Detected   | 3308.7   | Detected   | 7786.3   | Detected | 6332.5   | Detected   | Impact        | 1.347856626 | 1.65729428 | 1.91389367 | 2.3532807 |
| A_55_P1989 | 3909.3   | Detected   | 5314     | Detected   | 3073.9   | Detected | 5269.1   | Detected   | Cklf          | 1.347837209 | 0.78630445 | 0.99155062 | 0.5784531 |
| A_55_P2030 | 6.9      | Not Detect | 13.6     | Not Detect | 17.1     | Detected | 9.3      | Not Detect | 4933416108Rik | 1.347826087 | 2.47826087 | 0.68382353 | 1.2573529 |
| A_55_P2112 | 24129.4  | Detected   | 25073.1  | Detected   | 24888.8  | Detected | 32519.6  | Detected   | Hmg20b        | 1.347716893 | 1.03147198 | 1.2969916  | 0.9926495 |
| A_51_P3124 | 16814.6  | Detected   | 12395.3  | Detected   | 22066.2  | Detected | 22661.3  | Detected   | Dhrs7         | 1.347715676 | 1.31232381 | 1.82821715 | 1.780207  |
| A_55_P2157 | 42       | Detected   | 40.3     | Detected   | 58.5     | Detected | 56.6     | Detected   | Ccl1          | 1.347619048 | 1.39285714 | 1.4044665  | 1.4516129 |
| A_51_P3922 | 9790.1   | Detected   | 8027     | Detected   | 9965.5   | Detected | 13193.3  | Detected   | Tbcd          | 1.34761647  | 1.01791606 | 1.6436153  | 1.2414974 |
| A_51_P1052 | 317.6    | Detected   | 226.6    | Detected   | 339      | Detected | 428      | Detected   | Nat14         | 1.347607053 | 1.06738035 | 1.88879082 | 1.4960282 |
| A_55_P2163 | 553.5    | Detected   | 282.2    | Detected   | 556.7    | Detected | 745.9    | Detected   | 0610042G04Rik | 1.347606143 | 1.00578139 | 2.64316088 | 1.9727144 |
| A_55_P2058 | 1616.3   | Detected   | 1415.3   | Detected   | 1328.4   | Detected | 2177.6   | Detected   | Mterf1a       | 1.34727464  | 0.82187713 | 1.53861372 | 0.9385996 |
| A_51_P3973 | 1770.1   | Detected   | 2338.3   | Detected   | 2928.8   | Detected | 2384.8   | Detected   | Pet112        | 1.347268516 | 1.65459579 | 1.01988624 | 1.2525339 |
| A_51_P2329 | 1294.2   | Detected   | 1338.7   | Detected   | 1347.4   | Detected | 1743.4   | Detected   | Cnp           | 1.347087004 | 1.04110648 | 1.30230821 | 1.0064988 |
| A_55_P2080 | 29.1     | Detected   | 36.9     | Detected   | 27.2     | Detected | 39.2     | Not Detect | Cyp2b19       | 1.347079038 | 0.9347079  | 1.06233062 | 0.7371274 |
| A_51_P1659 | 11616.7  | Detected   | 15726.9  | Detected   | 17550.3  | Detected | 15645.8  | Detected   | Aup1          | 1.346836881 | 1.51078189 | 0.99484323 | 1.1159415 |
| A_55_P2090 | 107959.8 | Detected   | 11026.9  | Detected   | 100187.1 | Detected | 145402.5 | Detected   | Plcd4         | 1.346820761 | 0.92800376 | 13.1861629 | 9.0856995 |
| A_51_P2299 | 42.4     | Detected   | 42.9     | Detected   | 64.8     | Detected | 57.1     | Detected   | Rab30         | 1.346698113 | 1.52830189 | 1.33100233 | 1.5104895 |
| A_55_P2014 | 674.8    | Detected   | 658.1    | Detected   | 719.2    | Detected | 908.7    | Detected   | Iws1          | 1.346621221 | 1.06579727 | 1.38079319 | 1.092843  |
| A_55_P2106 | 91370    | Detected   | 91910.1  | Detected   | 125474   | Detected | 123009.4 | Detected   | Syngn2        | 1.346277772 | 1.37325161 | 1.33836651 | 1.3651818 |
| A_51_P2552 | 93.9     | Detected   | 103.5    | Detected   | 97.7     | Detected | 126.4    | Detected   | Olf15l3       | 1.346112886 | 1.04046858 | 1.22125604 | 0.9439614 |
| A_55_P2079 | 17878.2  | Detected   | 18112.7  | Detected   | 11329.7  | Detected | 24064.4  | Detected   | Ccdc68        | 1.346019174 | 0.63371592 | 1.32859264 | 0.6255114 |
| A_55_P2153 | 13854.5  | Detected   | 10321.5  | Detected   | 13196.9  | Detected | 18648.4  | Detected   | Sik3          | 1.346017539 | 0.95253528 | 1.80675289 | 1.2785835 |
| A_55_P2157 | 2304.8   | Detected   | 2039.4   | Detected   | 2738.4   | Detected | 3102.3   | Detected   | Tsc1          | 1.346017008 | 1.18812912 | 1.5211827  | 1.3427479 |
| A_52_P4987 | 158.4    | Detected   | 150.6    | Detected   | 165.4    | Detected | 213.2    | Detected   | Gsdmc3        | 1.345959596 | 1.04419192 | 1.41567065 | 1.0982736 |
| A_51_P3468 | 27402.1  | Detected   | 30448.9  | Detected   | 29991.5  | Detected | 36881.3  | Detected   | Snrnp27       | 1.345929692 | 1.09449641 | 1.21125229 | 0.9849781 |
| A_51_P1089 | 100.6    | Detected   | 111.8    | Detected   | 106.8    | Detected | 135.4    | Detected   | 4931414P19Rik | 1.345924453 | 1.06163022 | 1.21109123 | 0.9552773 |
| A_66_P1156 | 164.5    | Detected   | 144.4    | Detected   | 177      | Detected | 221.4    | Detected   | 1700071A11Rik | 1.345896657 | 1.07598784 | 1.533241   | 1.2257618 |
| A_55_P2142 | 50.6     | Detected   | 41.3     | Detected   | 48.5     | Detected | 68.1     | Detected   | Parp9         | 1.345849802 | 0.95849802 | 1.64891041 | 1.1743341 |



|            |          |            |          |          |          |            |          |            |               |             |            |            |           |
|------------|----------|------------|----------|----------|----------|------------|----------|------------|---------------|-------------|------------|------------|-----------|
| A_51_P5091 | 2157     | Detected   | 2049.6   | Detected | 2771.9   | Detected   | 2902.9   | Detected   | U2af114       | 1.345804358 | 1.28507186 | 1.41632514 | 1.3524102 |
| A_55_P2280 | 1179.2   | Detected   | 1114.5   | Detected | 737.7    | Detected   | 1586.9   | Detected   | A130088B03Rik | 1.345742877 | 0.62559362 | 1.42386721 | 0.6619112 |
| A_51_P1675 | 3958     | Detected   | 3113.4   | Detected | 4179.9   | Detected   | 5326     | Detected   | Leng1         | 1.345629106 | 1.05606367 | 1.71067001 | 1.3425516 |
| A_55_P2162 | 738.1    | Detected   | 894.6    | Detected | 927.3    | Detected   | 993.2    | Detected   | Pkhd1         | 1.345617125 | 1.25633383 | 1.11021686 | 1.0365526 |
| A_55_P1984 | 3844.2   | Detected   | 3825.4   | Detected | 2719.3   | Detected   | 5172.4   | Detected   | Usp48         | 1.345507518 | 0.70737735 | 1.35212004 | 0.7108538 |
| A_55_P2385 | 178.3    | Detected   | 167.2    | Detected | 118.4    | Detected   | 239.9    | Detected   | A130014A01Rik | 1.345485137 | 0.66404936 | 1.43480861 | 0.708134  |
| A_55_P1977 | 20203    | Detected   | 19620.7  | Detected | 26887.9  | Detected   | 27181.9  | Detected   | Nfu1          | 1.345438796 | 1.3308865  | 1.38536851 | 1.3703843 |
| A_55_P2203 | 1415.6   | Detected   | 1511.8   | Detected | 1508.6   | Detected   | 1904.5   | Detected   | 2900011F02Rik | 1.345365923 | 1.06569652 | 1.25975658 | 0.9978833 |
| A_55_P1953 | 19.4     | Detected   | 27.5     | Detected | 22.2     | Detected   | 26.1     | Not Detect | Tex35         | 1.345360825 | 1.1443299  | 0.94909091 | 0.8072727 |
| A_51_P2952 | 8097.4   | Detected   | 11124.8  | Detected | 7917.8   | Detected   | 10893.9  | Detected   | Alkbh5        | 1.345357769 | 0.97782004 | 0.97924457 | 0.7117252 |
| A_55_P2109 | 403.4    | Detected   | 450.7    | Detected | 415.6    | Detected   | 542.7    | Detected   | Zdhhc21       | 1.345314824 | 1.03024294 | 1.20412691 | 0.9221211 |
| A_51_P1673 | 1936.4   | Detected   | 1729.3   | Detected | 2152.1   | Detected   | 2604.8   | Detected   | Gpatch1       | 1.345176616 | 1.11139227 | 1.50627422 | 1.244492  |
| A_55_P2172 | 31869.9  | Detected   | 36853.6  | Detected | 39475.6  | Detected   | 42866    | Detected   | Scamp4        | 1.345030891 | 1.23864838 | 1.16314281 | 1.0711464 |
| A_52_P5695 | 2691.8   | Detected   | 3089.6   | Detected | 2182.6   | Detected   | 3620.3   | Detected   | Lig4          | 1.344936474 | 0.8108329  | 1.17176981 | 0.7064345 |
| A_55_P2040 | 3249.9   | Detected   | 3585.4   | Detected | 3816.8   | Detected   | 4370.9   | Detected   | Mtfr1         | 1.34493369  | 1.17443614 | 1.21908295 | 1.0645395 |
| A_52_P6082 | 385.6    | Detected   | 404.1    | Detected | 374.4    | Detected   | 518.6    | Detected   | Pim2          | 1.344917012 | 0.97095436 | 1.28334571 | 0.9265033 |
| A_52_P6006 | 907.3    | Detected   | 1020.2   | Detected | 794.2    | Detected   | 1220.2   | Detected   | Rad23b        | 1.344869393 | 0.87534443 | 1.19603999 | 0.7784748 |
| A_55_P2127 | 394.9    | Detected   | 450.2    | Detected | 467.3    | Detected   | 531      | Detected   | Bcas3         | 1.344644214 | 1.18333755 | 1.17947579 | 1.0379831 |
| A_55_P2041 | 109.4    | Detected   | 101.7    | Detected | 109      | Detected   | 147.1    | Detected   | 1500009C09Rik | 1.344606947 | 0.99634369 | 1.44641101 | 1.0717797 |
| A_51_P2917 | 6410.1   | Detected   | 11360.3  | Detected | 11130.3  | Detected   | 8618.3   | Detected   | Pecr          | 1.344487605 | 1.73636917 | 0.75863313 | 0.9797541 |
| A_66_P1065 | 5764.6   | Detected   | 5539.6   | Detected | 7339.2   | Detected   | 7750.1   | Detected   | Vhl           | 1.344429796 | 1.27314991 | 1.39903603 | 1.324861  |
| A_55_P2137 | 171.9    | Detected   | 142.9    | Detected | 325.9    | Detected   | 231.1    | Detected   | Crb3          | 1.344386271 | 1.89586969 | 1.61721484 | 2.2806158 |
| A_55_P2011 | 24.4     | Detected   | 21.2     | Detected | 29.6     | Detected   | 32.8     | Not Detect | Cyb561a3      | 1.344262295 | 1.21311475 | 1.54716981 | 1.3962264 |
| A_55_P2133 | 4649     | Detected   | 4511     | Detected | 7059.6   | Detected   | 6249.1   | Detected   | Vkorc1        | 1.344181544 | 1.51852011 | 1.38530259 | 1.5649745 |
| A_55_P2101 | 700.8    | Detected   | 660.2    | Detected | 828.5    | Detected   | 942      | Detected   | Stxbp3b       | 1.344178082 | 1.18222032 | 1.42684035 | 1.2549228 |
| A_55_P2033 | 180853.1 | Detected   | 218931.5 | Detected | 178764.5 | Detected   | 243091.5 | Detected   | Gm5445        | 1.344137867 | 0.9884514  | 1.11035415 | 0.8165317 |
| A_55_P1981 | 18.6     | Detected   | 18.9     | Detected | 11.6     | Not Detect | 25       | Not Detect | Rreb1         | 1.344086022 | 0.62365591 | 1.32275132 | 0.6137566 |
| A_55_P1976 | 221.2    | Detected   | 248.4    | Detected | 109.2    | Detected   | 297.3    | Detected   | Ccdc176       | 1.34403255  | 0.49367089 | 1.1968599  | 0.4396135 |
| A_55_P2120 | 234      | Detected   | 179.5    | Detected | 239.4    | Detected   | 314.5    | Detected   | Zmynd11       | 1.344017094 | 1.02307692 | 1.75208914 | 1.3337047 |
| A_51_P4318 | 9774.9   | Detected   | 14949.6  | Detected | 7230.9   | Detected   | 13137.5  | Detected   | Map1s         | 1.344003519 | 0.73974158 | 0.87878605 | 0.4836852 |
| A_55_P2029 | 3003.4   | Detected   | 4242.1   | Detected | 3775.4   | Detected   | 4036.1   | Detected   | Snap47        | 1.343843644 | 1.25704202 | 0.95143915 | 0.8899837 |
| A_51_P3301 | 57.3     | Detected   | 34.8     | Detected | 49.4     | Detected   | 77       | Detected   | Ift140        | 1.343804538 | 0.86212914 | 2.21264368 | 1.4195402 |
| A_51_P1460 | 9123.1   | Detected   | 5480.6   | Detected | 9743.2   | Detected   | 12257    | Detected   | Ccdc92        | 1.343512622 | 1.06797032 | 2.23643397 | 1.7777616 |
| A_55_P2109 | 9.9      | Not Detect | 16.4     | Detected | 16.8     | Detected   | 13.3     | Not Detect | Scn11a        | 1.343434343 | 1.6969697  | 0.81097561 | 1.0243902 |
| A_51_P1119 | 1476     | Detected   | 1610.6   | Detected | 1716.4   | Detected   | 1982.9   | Detected   | Tor1aip2      | 1.343428184 | 1.16287263 | 1.23115609 | 1.0656898 |
| A_55_P2114 | 720.1    | Detected   | 839.8    | Detected | 879.9    | Detected   | 967.4    | Detected   | Acrbp         | 1.343424524 | 1.22191362 | 1.15194094 | 1.0477495 |
| A_55_P2017 | 1779.4   | Detected   | 2260     | Detected | 3048.7   | Detected   | 2390.3   | Detected   | Phf7          | 1.343317972 | 1.71333034 | 1.05765487 | 1.3489823 |
| A_55_P2106 | 433.2    | Detected   | 590.8    | Detected | 518.2    | Detected   | 581.9    | Detected   | Gm11110       | 1.343259464 | 1.19621422 | 0.98493568 | 0.8771158 |
| A_55_P2259 | 50.4     | Detected   | 50.5     | Detected | 58       | Detected   | 67.7     | Detected   | AK155734      | 1.343253968 | 1.15079365 | 1.34059406 | 1.1485149 |
| A_52_P2177 | 1574     | Detected   | 2753.1   | Detected | 1645.6   | Detected   | 2113.9   | Detected   | Fzd6          | 1.343011436 | 1.0454892  | 0.76782536 | 0.5977262 |

|            |                  |                  |                   |                   |               |             |            |            |           |
|------------|------------------|------------------|-------------------|-------------------|---------------|-------------|------------|------------|-----------|
| A_55_P2094 | 151.6 Detected   | 165 Detected     | 144.6 Detected    | 203.6 Detected    | Sox10         | 1.343007916 | 0.95382586 | 1.23393939 | 0.8763636 |
| A_51_P3969 | 173.2 Detected   | 111.1 Detected   | 221.1 Detected    | 232.6 Detected    | Ssu2          | 1.34295612  | 1.27655889 | 2.09360936 | 1.990099  |
| A_55_P2147 | 35.3 Detected    | 39.4 Detected    | 40.8 Detected     | 47.4 Detected     | Slc38a11      | 1.342776204 | 1.15580737 | 1.20304569 | 1.035533  |
| A_55_P2113 | 1294.1 Detected  | 1490.4 Detected  | 1727.3 Detected   | 1737.6 Detected   | Scnm1         | 1.342709219 | 1.33475002 | 1.16586151 | 1.1589506 |
| A_55_P2116 | 1897.5 Detected  | 1735.2 Detected  | 2735.1 Detected   | 2547.7 Detected   | 9430038I01Rik | 1.342661397 | 1.44142292 | 1.46824574 | 1.5762448 |
| A_55_P1960 | 6230.9 Detected  | 4938.9 Detected  | 6508.5 Detected   | 8365.9 Detected   | Ubn1          | 1.34264713  | 1.04455215 | 1.6938792  | 1.3178036 |
| A_55_P2107 | 36.2 Detected    | 38.5 Detected    | 39.9 Detected     | 48.6 Not Detect   | Col25a1       | 1.342541436 | 1.10220994 | 1.26233766 | 1.0363636 |
| A_51_P2725 | 2858.5 Detected  | 3102.5 Detected  | 3376.9 Detected   | 3837.6 Detected   | Dym           | 1.342522302 | 1.18135386 | 1.23693795 | 1.0884448 |
| A_55_P2081 | 12997 Detected   | 15392.5 Detected | 16129.6 Detected  | 17446.7 Detected  | BC052688      | 1.342363622 | 1.24102485 | 1.1334546  | 1.047887  |
| A_55_P2024 | 8673.3 Detected  | 12328.6 Detected | 9239.3 Detected   | 11641.2 Detected  | Fars2         | 1.342188094 | 1.06525775 | 0.94424347 | 0.74942   |
| A_55_P1996 | 1951.9 Detected  | 1920.4 Detected  | 2089.5 Detected   | 2619.8 Detected   | Polr2a        | 1.342179415 | 1.07049541 | 1.36419496 | 1.0880546 |
| A_52_P5502 | 979.3 Detected   | 1083.3 Detected  | 1321.4 Detected   | 1314.1 Detected   | Trmt12        | 1.341876851 | 1.34933115 | 1.21305271 | 1.2197914 |
| A_55_P2128 | 1242.4 Detected  | 1374.2 Detected  | 1247.1 Detected   | 1667 Detected     | Trappc13      | 1.341757888 | 1.003783   | 1.21306942 | 0.9075098 |
| A_55_P1967 | 4646.5 Detected  | 4865 Detected    | 4813.2 Detected   | 6233.8 Detected   | Fln           | 1.341611966 | 1.03587647 | 1.28135663 | 0.9893525 |
| A_51_P2964 | 187.7 Detected   | 232.7 Detected   | 206.4 Detected    | 251.8 Detected    | Tmem170       | 1.341502397 | 1.09962706 | 1.08207993 | 0.8869789 |
| A_51_P1526 | 648.8 Detected   | 672.5 Detected   | 831.7 Detected    | 870.2 Detected    | Nol7          | 1.341245376 | 1.28190506 | 1.2939777  | 1.2367286 |
| A_66_P1326 | 1504.2 Detected  | 1409.3 Detected  | 1237.3 Detected   | 2017.4 Detected   | C230057M02Rik | 1.341178035 | 0.82256349 | 1.43149081 | 0.8779536 |
| A_52_P1540 | 25.5 Detected    | 32.1 Detected    | 20 Detected       | 34.2 Not Detect   | Blk           | 1.341176471 | 0.78431373 | 1.06542056 | 0.623053  |
| A_55_P2059 | 148302 Detected  | 157890 Detected  | 135281.3 Detected | 198839.6 Detected | Lamp1         | 1.340774905 | 0.91220145 | 1.25935525 | 0.8568073 |
| A_51_P3574 | 2296.5 Detected  | 1966.4 Detected  | 2885.6 Detected   | 3079 Detected     | Ap1g2         | 1.340735902 | 1.25652079 | 1.56580553 | 1.4674532 |
| A_55_P1992 | 1005.2 Detected  | 1282.2 Detected  | 1308.9 Detected   | 1347.6 Detected   | Shq1          | 1.340628731 | 1.30212893 | 1.05100608 | 1.0208236 |
| A_51_P2468 | 4128 Detected    | 3955.3 Detected  | 4281.4 Detected   | 5534.1 Detected   | Napa          | 1.340625    | 1.03716085 | 1.39916062 | 1.0824463 |
| A_52_P3707 | 23.2 Detected    | 18.3 Not Detect  | 22.2 Detected     | 31.1 Not Detect   | 1700084E18Rik | 1.340517241 | 0.95689655 | 1.69945355 | 1.2131148 |
| A_55_P2077 | 39216.8 Detected | 34615.9 Detected | 42338.8 Detected  | 52568 Detected    | Ppp1cc        | 1.340445931 | 1.07960874 | 1.5186085  | 1.2231027 |
| A_55_P1987 | 26072.2 Detected | 21695 Detected   | 33340.2 Detected  | 34946.9 Detected  | Psenen        | 1.34038938  | 1.27876435 | 1.61082738 | 1.5367688 |
| A_55_P2150 | 374.4 Detected   | 397.4 Detected   | 507.1 Detected    | 501.8 Detected    | Lalba         | 1.340277778 | 1.35443376 | 1.2627076  | 1.2760443 |
| A_55_P2149 | 187.2 Detected   | 215.6 Detected   | 205.8 Detected    | 250.9 Detected    | Khsrp         | 1.340277778 | 1.09935897 | 1.16372913 | 0.9545455 |
| A_55_P1958 | 3591.1 Detected  | 2900 Detected    | 4025.1 Detected   | 4813 Detected     | Parp6         | 1.34025786  | 1.12085433 | 1.65965517 | 1.3879655 |
| A_51_P2685 | 25820.7 Detected | 26675.9 Detected | 26046.5 Detected  | 34604.4 Detected  | Idh3a         | 1.340180553 | 1.00874492 | 1.29721584 | 0.9764057 |
| A_55_P2001 | 8703.2 Detected  | 8572.9 Detected  | 7104.7 Detected   | 11663 Detected    | Stx18         | 1.340081809 | 0.81633192 | 1.36044979 | 0.8287394 |
| A_55_P2178 | 1339 Detected    | 1246.6 Detected  | 1185.2 Detected   | 1794.3 Detected   | Zbtb5         | 1.340029873 | 0.88513816 | 1.43935505 | 0.950746  |
| A_66_P1199 | 15 Detected      | 9.9 Not Detect   | 16.8 Not Detect   | 20.1 Not Detect   | Thpo          | 1.34        | 1.12       | 2.03030303 | 1.6969697 |
| A_55_P2113 | 13653.1 Detected | 9819.9 Detected  | 12649.9 Detected  | 18294 Detected    | Sik3          | 1.339915477 | 0.92652218 | 1.86295176 | 1.2881903 |
| A_55_P1975 | 2363.6 Detected  | 2257.7 Detected  | 2662.6 Detected   | 3167 Detected     | Timmdc1       | 1.339905229 | 1.12650195 | 1.40275502 | 1.1793418 |
| A_55_P2016 | 61.2 Detected    | 55.7 Detected    | 46.9 Detected     | 82 Detected       | Ppfia4        | 1.339869281 | 0.76633987 | 1.47217235 | 0.8420108 |
| A_55_P1975 | 2715.3 Detected  | 3759.9 Detected  | 3413.1 Detected   | 3638.1 Detected   | Rad18         | 1.33985195  | 1.25698818 | 0.96760552 | 0.9077635 |
| A_51_P2058 | 71.8 Detected    | 42.7 Detected    | 70 Detected       | 96.2 Detected     | Klf11         | 1.339832869 | 0.97493036 | 2.2529274  | 1.6393443 |
| A_55_P2024 | 296.4 Detected   | 453.7 Detected   | 312.3 Detected    | 397.1 Detected    | Lama3         | 1.33974359  | 1.05364372 | 0.87524796 | 0.6883403 |
| A_52_P3493 | 20.9 Detected    | 25.1 Detected    | 33.8 Detected     | 28 Not Detect     | B3gat1        | 1.339712919 | 1.61722488 | 1.11553785 | 1.3466135 |
| A_55_P2379 | 981.9 Detected   | 969.7 Detected   | 1250.2 Detected   | 1315.4 Detected   | Asph          | 1.339647622 | 1.27324575 | 1.35650201 | 1.2892647 |

|            |          |          |          |          |          |            |          |            |               |             |            |            |           |
|------------|----------|----------|----------|----------|----------|------------|----------|------------|---------------|-------------|------------|------------|-----------|
| A_52_P6744 | 483.3    | Detected | 508.6    | Detected | 567.2    | Detected   | 647.4    | Detected   | Irak4         | 1.339540658 | 1.17359818 | 1.27290602 | 1.1152182 |
| A_51_P4480 | 9575.9   | Detected | 9212.7   | Detected | 13142.2  | Detected   | 12826.6  | Detected   | Cox6b1        | 1.339466786 | 1.37242452 | 1.39227371 | 1.4265308 |
| A_55_P2403 | 38.6     | Detected | 32.3     | Detected | 53.4     | Detected   | 51.7     | Detected   | 1700092C02Rik | 1.339378238 | 1.38341969 | 1.6006192  | 1.6532508 |
| A_52_P6567 | 56.3     | Detected | 69.9     | Detected | 76.1     | Detected   | 75.4     | Detected   | Ctf2          | 1.339253996 | 1.35168739 | 1.07868383 | 1.0886981 |
| A_55_P2162 | 5537.3   | Detected | 4733.6   | Detected | 5530.5   | Detected   | 7415.6   | Detected   | Lrsam1        | 1.33920864  | 0.99877196 | 1.5665878  | 1.1683497 |
| A_55_P2002 | 6494.3   | Detected | 6552.3   | Detected | 5819.4   | Detected   | 8697.1   | Detected   | Zmiz2         | 1.339189751 | 0.8960781  | 1.32733544 | 0.8881461 |
| A_52_P3345 | 17.1     | Detected | 63.3     | Detected | 21.7     | Detected   | 22.9     | Not Detect | Vdr           | 1.339181287 | 1.26900585 | 0.36176935 | 0.342812  |
| A_55_P2371 | 128      | Detected | 125.3    | Detected | 87.5     | Detected   | 171.4    | Detected   | 9030601B04Rik | 1.3390625   | 0.68359375 | 1.367917   | 0.698324  |
| A_52_P6841 | 1451.2   | Detected | 999.4    | Detected | 1775     | Detected   | 1943.2   | Detected   | 2510002D24Rik | 1.339029768 | 1.22312569 | 1.94436662 | 1.7760656 |
| A_55_P1977 | 649.8    | Detected | 741.8    | Detected | 606.8    | Detected   | 870.1    | Detected   | Ttc14         | 1.339027393 | 0.93382579 | 1.17295767 | 0.8180102 |
| A_55_P2003 | 5160     | Detected | 6170.1   | Detected | 7094.2   | Detected   | 6908     | Detected   | Scnm1         | 1.33875969  | 1.37484496 | 1.11959288 | 1.1497707 |
| A_55_P2022 | 658      | Detected | 825.9    | Detected | 513      | Detected   | 880.9    | Detected   | Zfp866        | 1.338753799 | 0.77963526 | 1.06659402 | 0.6211406 |
| A_55_P2040 | 8120.8   | Detected | 9025.8   | Detected | 7251.9   | Detected   | 10871.3  | Detected   | Dhx15         | 1.338698158 | 0.89300315 | 1.20446941 | 0.8034634 |
| A_55_P2201 | 261.3    | Detected | 228.7    | Detected | 263.6    | Detected   | 349.8    | Detected   | AI790442      | 1.33869116  | 1.00880214 | 1.52951465 | 1.1526017 |
| A_52_P4739 | 3101.2   | Detected | 2035.1   | Detected | 3827.3   | Detected   | 4151.4   | Detected   | Ctdspl        | 1.338643106 | 1.23413517 | 2.03989976 | 1.8806447 |
| A_55_P2002 | 45.2     | Detected | 46.3     | Detected | 43.1     | Detected   | 60.5     | Detected   | Gm833         | 1.338495575 | 0.95353982 | 1.30669546 | 0.9308855 |
| A_55_P2026 | 33786.2  | Detected | 31389.7  | Detected | 41006.6  | Detected   | 45217.1  | Detected   | Capns1        | 1.338330443 | 1.21370856 | 1.44050756 | 1.3063712 |
| A_55_P2030 | 162      | Detected | 166.9    | Detected | 134      | Detected   | 216.8    | Detected   | Ifna5         | 1.338271605 | 0.82716049 | 1.29898143 | 0.802876  |
| A_51_P4568 | 107.1    | Detected | 258.4    | Detected | 443.1    | Detected   | 143.3    | Detected   | Foxj1         | 1.338001867 | 4.1372549  | 0.55456656 | 1.7147833 |
| A_52_P1035 | 5508.6   | Detected | 6677.1   | Detected | 5007.2   | Detected   | 7370.5   | Detected   | Tfdp1         | 1.337998766 | 0.90897869 | 1.10384748 | 0.7499064 |
| A_55_P2090 | 3172.8   | Detected | 3275.3   | Detected | 3431.5   | Detected   | 4244.6   | Detected   | Zfp956        | 1.337808875 | 1.08153681 | 1.29594236 | 1.0476903 |
| A_55_P2097 | 906      | Detected | 518      | Detected | 672.4    | Detected   | 1212     | Detected   | Stxbp1        | 1.337748344 | 0.74216336 | 2.33976834 | 1.2980695 |
| A_55_P2010 | 58940.7  | Detected | 56159.5  | Detected | 58925    | Detected   | 78847.1  | Detected   | Gabarap       | 1.337736064 | 0.99973363 | 1.40398508 | 1.0492437 |
| A_55_P2167 | 4199.5   | Detected | 1943     | Detected | 7437.5   | Detected   | 5617.3   | Detected   | Pvrl2         | 1.33761162  | 1.77104417 | 2.89104478 | 3.8278435 |
| A_55_P1994 | 101.6    | Detected | 93.7     | Detected | 91       | Detected   | 135.9    | Detected   | Shank1        | 1.337598425 | 0.89566929 | 1.45037353 | 0.9711846 |
| A_52_P2495 | 2206.7   | Detected | 2225.3   | Detected | 2124.4   | Detected   | 2951.6   | Detected   | Ado           | 1.337562877 | 0.96270449 | 1.32638296 | 0.9546578 |
| A_55_P2085 | 194.4    | Detected | 254.9    | Detected | 171.6    | Detected   | 260      | Detected   | Aco1          | 1.33744856  | 0.88271605 | 1.02000785 | 0.6732052 |
| A_55_P2042 | 48.6     | Detected | 84       | Detected | 37.4     | Detected   | 65       | Detected   | Fam161a       | 1.33744856  | 0.76954733 | 0.77380952 | 0.4452381 |
| A_55_P2171 | 31734.3  | Detected | 35829.6  | Detected | 43781.7  | Detected   | 42442.3  | Detected   | Mrps33        | 1.337426696 | 1.37963339 | 1.18455969 | 1.2219422 |
| A_55_P1980 | 120177.3 | Detected | 120976.8 | Detected | 143414.5 | Detected   | 160713.4 | Detected   | Pcbp1         | 1.337302469 | 1.19335765 | 1.32846463 | 1.1854711 |
| A_51_P4206 | 8988.3   | Detected | 11400.4  | Detected | 11308.2  | Detected   | 12020    | Detected   | Reep4         | 1.337294038 | 1.2581022  | 1.05434897 | 0.9919126 |
| A_55_P2027 | 17535    | Detected | 25391.2  | Detected | 27611.5  | Detected   | 23448.7  | Detected   | Adck5         | 1.337251212 | 1.5746507  | 0.92349712 | 1.0874437 |
| A_55_P1982 | 730.1    | Detected | 544.7    | Detected | 632.9    | Detected   | 976.2    | Detected   | Dnajb5        | 1.337077113 | 0.86686755 | 1.79217918 | 1.161924  |
| A_51_P1144 | 27       | Detected | 29.9     | Detected | 71.5     | Detected   | 36.1     | Not Detect | Ccl17         | 1.337037037 | 2.64814815 | 1.20735786 | 2.3913043 |
| A_55_P2032 | 18.1     | Detected | 17.6     | Detected | 13.7     | Not Detect | 24.2     | Not Detect | Slc5a4a       | 1.337016575 | 0.75690608 | 1.375      | 0.7784091 |
| A_55_P2181 | 81.6     | Detected | 88.7     | Detected | 91.4     | Detected   | 109.1    | Detected   | Mfap2         | 1.337009804 | 1.12009804 | 1.22998873 | 1.0304397 |
| A_55_P2177 | 1077.2   | Detected | 1139.6   | Detected | 1164.3   | Detected   | 1440.2   | Detected   | Chrna2        | 1.336984775 | 1.08085778 | 1.26377676 | 1.0216743 |
| A_55_P2467 | 1076.4   | Detected | 1092.5   | Detected | 922.8    | Detected   | 1439.1   | Detected   | B3galt6       | 1.336956522 | 0.85730212 | 1.317254   | 0.8446682 |
| A_51_P4834 | 16571.1  | Detected | 12103    | Detected | 19852.6  | Detected   | 22154.6  | Detected   | St3gal5       | 1.336942026 | 1.19802548 | 1.83050483 | 1.6403041 |
| A_55_P2023 | 232.4    | Detected | 218.5    | Detected | 267.6    | Detected   | 310.7    | Detected   | Lsm2          | 1.336919105 | 1.15146299 | 1.42196796 | 1.224714  |

|            |         |          |         |            |         |            |          |            |          |             |            |            |           |
|------------|---------|----------|---------|------------|---------|------------|----------|------------|----------|-------------|------------|------------|-----------|
| A_51_P3368 | 8825.6  | Detected | 12364.1 | Detected   | 10054.3 | Detected   | 11798.9  | Detected   | Cyb5b    | 1.336894942 | 1.13922    | 0.95428701 | 0.8131849 |
| A_55_P1975 | 15305.4 | Detected | 15284.9 | Detected   | 17197.5 | Detected   | 20460.6  | Detected   | Ppp2r5a  | 1.336822298 | 1.12362304 | 1.33861523 | 1.12513   |
| A_55_P1970 | 5432    | Detected | 7494.4  | Detected   | 5910.3  | Detected   | 7261.2   | Detected   | Pemt     | 1.336745214 | 1.08805228 | 0.96888343 | 0.7886288 |
| A_52_P5278 | 740.4   | Detected | 1209.3  | Detected   | 934.3   | Detected   | 989.6    | Detected   | Reps1    | 1.336574824 | 1.26188547 | 0.81832465 | 0.7725957 |
| A_51_P2295 | 1052.4  | Detected | 969.3   | Detected   | 1567.9  | Detected   | 1406.6   | Detected   | Etnk1    | 1.336564044 | 1.48983276 | 1.45115031 | 1.6175591 |
| A_55_P2022 | 7789.7  | Detected | 6767.2  | Detected   | 7242.6  | Detected   | 10411.1  | Detected   | Zfp579   | 1.336521304 | 0.92976623 | 1.53846495 | 1.0702506 |
| A_52_P3677 | 1145.7  | Detected | 1171.4  | Detected   | 1022.6  | Detected   | 1531.1   | Detected   | Zfp821   | 1.336388234 | 0.89255477 | 1.30706847 | 0.8729725 |
| A_52_P4458 | 16356.9 | Detected | 16026.4 | Detected   | 15509.9 | Detected   | 21858.5  | Detected   | Abcf2    | 1.336347352 | 0.94821757 | 1.36390581 | 0.9677719 |
| A_55_P1999 | 6487.6  | Detected | 6137    | Detected   | 7030.8  | Detected   | 8668.6   | Detected   | Ino80e   | 1.336179789 | 1.08372896 | 1.41251426 | 1.1456412 |
| A_55_P1992 | 23.5    | Detected | 15.6    | Not Detect | 13.2    | Not Detect | 31.4     | Not Detect | Gm3414   | 1.336170213 | 0.56170213 | 2.01282051 | 0.8461538 |
| A_55_P2032 | 5762.8  | Detected | 1973.2  | Detected   | 10007.7 | Detected   | 7699.4   | Detected   | Dbp      | 1.336051919 | 1.73660373 | 3.90198662 | 5.0718123 |
| A_55_P2126 | 360.2   | Detected | 563.4   | Detected   | 606.4   | Detected   | 481.2    | Detected   | Nmb      | 1.335924486 | 1.68350916 | 0.85410011 | 1.0763223 |
| A_55_P2143 | 7452.7  | Detected | 7930.6  | Detected   | 5989.2  | Detected   | 9956     | Detected   | Nfib     | 1.33589169  | 0.80362822 | 1.25539051 | 0.7552014 |
| A_55_P2016 | 30865.2 | Detected | 34656.3 | Detected   | 33354.7 | Detected   | 41232.1  | Detected   | Gm5068   | 1.335876651 | 1.08065718 | 1.18974328 | 0.9624426 |
| A_55_P1956 | 37453.9 | Detected | 39074.7 | Detected   | 32620.3 | Detected   | 50030.5  | Detected   | H2-Q4    | 1.335788796 | 0.87094535 | 1.28038091 | 0.8348189 |
| A_55_P1963 | 2117.8  | Detected | 1770.5  | Detected   | 2477.6  | Detected   | 2828.4   | Detected   | Nxpe3    | 1.335536878 | 1.16989329 | 1.59751483 | 1.3993787 |
| A_51_P1220 | 3179.5  | Detected | 3190.4  | Detected   | 3081.4  | Detected   | 4245.8   | Detected   | Nipa1    | 1.335367196 | 0.96914609 | 1.33080491 | 0.965835  |
| A_55_P2154 | 89335.9 | Detected | 87141.1 | Detected   | 93409.3 | Detected   | 119286.9 | Detected   | Smarca4  | 1.335262756 | 1.04559645 | 1.36889367 | 1.0719316 |
| A_52_P2839 | 4908    | Detected | 4991.6  | Detected   | 6299.4  | Detected   | 6553.4   | Detected   | Hnrnpdl  | 1.335248574 | 1.28349633 | 1.31288565 | 1.2620002 |
| A_55_P2064 | 26744.1 | Detected | 22884.1 | Detected   | 23690.7 | Detected   | 35704.3  | Detected   | Prkci    | 1.335034643 | 0.88582902 | 1.56022304 | 1.0352472 |
| A_55_P1972 | 6415.3  | Detected | 6789.1  | Detected   | 6626.5  | Detected   | 8564.4   | Detected   | Rars2    | 1.334996025 | 1.0329213  | 1.26149269 | 0.9760498 |
| A_55_P2072 | 327.5   | Detected | 286.6   | Detected   | 400.5   | Detected   | 437.2    | Detected   | Zfp954   | 1.334961832 | 1.22290076 | 1.52547104 | 1.397418  |
| A_51_P4137 | 21539.1 | Detected | 16245.9 | Detected   | 22823.1 | Detected   | 28753.8  | Detected   | Commd3   | 1.334958285 | 1.05961252 | 1.76991118 | 1.4048529 |
| A_51_P1084 | 8222.4  | Detected | 10747.7 | Detected   | 7667.6  | Detected   | 10976.3  | Detected   | Gtl3     | 1.334926542 | 0.93252578 | 1.02126967 | 0.7134178 |
| A_55_P2016 | 305.3   | Detected | 319.3   | Detected   | 238.2   | Detected   | 407.5    | Detected   | Ylpm1    | 1.334752702 | 0.78021618 | 1.27622925 | 0.7460069 |
| A_66_P1083 | 26.3    | Detected | 39.6    | Detected   | 48.5    | Detected   | 35.1     | Not Detect | Rbakdn   | 1.33460076  | 1.84410646 | 0.88636364 | 1.2247475 |
| A_55_P2162 | 254.1   | Detected | 350.7   | Detected   | 321.7   | Detected   | 339.1    | Detected   | Lrsam1   | 1.334513971 | 1.26603699 | 0.9669233  | 0.9173082 |
| A_55_P2101 | 445.8   | Detected | 489     | Detected   | 386.6   | Detected   | 594.9    | Detected   | Gpbar1   | 1.334454913 | 0.86720502 | 1.21656442 | 0.790593  |
| A_55_P1972 | 3472.3  | Detected | 2806.8  | Detected   | 3879.3  | Detected   | 4633.6   | Detected   | Eftud1   | 1.334446908 | 1.11721337 | 1.65084794 | 1.3821077 |
| A_55_P2134 | 4909.3  | Detected | 6452.4  | Detected   | 6289.5  | Detected   | 6551.2   | Detected   | Cnot2    | 1.334446866 | 1.28113988 | 1.01531213 | 0.9747536 |
| A_55_P1957 | 8929.4  | Detected | 7035    | Detected   | 9911.9  | Detected   | 11914.4  | Detected   | Rsu1     | 1.334288978 | 1.11002979 | 1.6935892  | 1.408941  |
| A_66_P1057 | 462.5   | Detected | 611.1   | Detected   | 562.8   | Detected   | 617.1    | Detected   | Ap4s1    | 1.33427027  | 1.21686486 | 1.00981836 | 0.9209622 |
| A_51_P1726 | 4311.4  | Detected | 3569.8  | Detected   | 3851.2  | Detected   | 5752.5   | Detected   | Stard3nl | 1.334253375 | 0.89325973 | 1.61143481 | 1.0788279 |
| A_51_P3914 | 16397.4 | Detected | 13994.6 | Detected   | 26729.4 | Detected   | 21877.7  | Detected   | Ifngr1   | 1.33421762  | 1.63009989 | 1.56329584 | 1.9099796 |
| A_55_P2169 | 6757.1  | Detected | 7161.4  | Detected   | 7565.7  | Detected   | 9014.9   | Detected   | Ccdc53   | 1.334137426 | 1.11966672 | 1.25881811 | 1.0564554 |
| A_66_P1303 | 209.2   | Detected | 220     | Detected   | 221     | Detected   | 279.1    | Detected   | Stk38l   | 1.334130019 | 1.05640535 | 1.26863636 | 1.0045455 |
| A_55_P2052 | 36002.8 | Detected | 45747.6 | Detected   | 41046.8 | Detected   | 48031    | Detected   | Rpl13a   | 1.334090682 | 1.14010021 | 1.049913   | 0.8972449 |
| A_55_P2159 | 14563.4 | Detected | 13512.9 | Detected   | 17627.1 | Detected   | 19426.3  | Detected   | Decr1    | 1.333912411 | 1.21036983 | 1.43761147 | 1.3044646 |
| A_55_P1999 | 45783   | Detected | 50314.3 | Detected   | 55710.5 | Detected   | 61061.2  | Detected   | Krt85    | 1.333709019 | 1.21683813 | 1.21359534 | 1.1072498 |
| A_55_P2051 | 536.7   | Detected | 689.8   | Detected   | 671.9   | Detected   | 715.8    | Detected   | Sco1     | 1.333705981 | 1.25190982 | 1.03769208 | 0.9740504 |

|            |                  |                  |                  |                  |               |             |            |            |           |
|------------|------------------|------------------|------------------|------------------|---------------|-------------|------------|------------|-----------|
| A_51_P4038 | 101.9 Detected   | 97.4 Detected    | 84.8 Detected    | 135.9 Detected   | Syngn3        | 1.333660451 | 0.83218842 | 1.39527721 | 0.8706366 |
| A_52_P5141 | 130.7 Detected   | 148.8 Detected   | 189.3 Detected   | 174.3 Detected   | Glrx2         | 1.33358837  | 1.44835501 | 1.17137097 | 1.2721774 |
| A_52_P3097 | 516.5 Detected   | 553 Detected     | 506.6 Detected   | 688.7 Detected   | D14Abb1e      | 1.33339787  | 0.98083253 | 1.24538879 | 0.916094  |
| A_51_P3949 | 555.5 Detected   | 499.7 Detected   | 574.1 Detected   | 740.7 Detected   | 1700020L24Rik | 1.333393339 | 1.03348335 | 1.48228937 | 1.1488893 |
| A_55_P2155 | 617.4 Detected   | 668.1 Detected   | 613.1 Detected   | 823.2 Detected   | Hace1         | 1.333333333 | 0.99303531 | 1.23215088 | 0.917677  |
| A_55_P2160 | 46.8 Detected    | 64 Detected      | 46.5 Detected    | 62.4 Detected    | Slc8a3        | 1.333333333 | 0.99358974 | 0.975      | 0.7265625 |
| A_55_P2104 | 7.2 Not Detect   | 3.6 Not Detect   | 24.2 Detected    | 9.6 Not Detect   | Cysltr1       | 1.333333333 | 3.36111111 | 2.66666667 | 6.7222222 |
| A_51_P3833 | 32.7 Detected    | 17.5 Detected    | 2184.6 Detected  | 43.6 Detected    | Aldh1a7       | 1.333333333 | 66.8073394 | 2.49142857 | 124.83429 |
| A_55_P2391 | 26.1 Detected    | 23.7 Detected    | 27.6 Detected    | 34.8 Not Detect  | 4933415J04Rik | 1.333333333 | 1.05747126 | 1.46835443 | 1.164557  |
| A_55_P1976 | 11.4 Not Detect  | 11.4 Not Detect  | 16.7 Detected    | 15.2 Not Detect  | Olf46         | 1.333333333 | 1.46491228 | 1.33333333 | 1.4649123 |
| A_51_P2424 | 18 Detected      | 19.9 Detected    | 18.3 Detected    | 24 Not Detect    | Ankrd60       | 1.333333333 | 1.01666667 | 1.20603015 | 0.919598  |
| A_55_P2046 | 9.3 Not Detect   | 19.5 Detected    | 16.7 Detected    | 12.4 Not Detect  | Kbtbd11       | 1.333333333 | 1.79569892 | 0.63589744 | 0.8564103 |
| A_55_P2087 | 18045 Detected   | 13652.6 Detected | 23467.8 Detected | 24059.5 Detected | Dnaja3        | 1.333305625 | 1.30051538 | 1.76226506 | 1.7189253 |
| A_51_P3562 | 14087.6 Detected | 22527.9 Detected | 14548.7 Detected | 18782.7 Detected | Fbxo31        | 1.333278912 | 1.03273091 | 0.83375281 | 0.6458081 |
| A_51_P3504 | 1049.8 Detected  | 948.3 Detected   | 1189.8 Detected  | 1399.6 Detected  | Exoc4         | 1.333206325 | 1.13335873 | 1.47590425 | 1.2546662 |
| A_52_P2015 | 208 Detected     | 137.1 Detected   | 121.3 Detected   | 277.3 Detected   | Myo9a         | 1.333173077 | 0.58317308 | 2.02261123 | 0.8847557 |
| A_52_P4466 | 463.1 Detected   | 1193.3 Detected  | 329.9 Detected   | 617.3 Detected   | Rhbdl2        | 1.33297344  | 0.71237314 | 0.51730495 | 0.2764602 |
| A_55_P2010 | 175.1 Detected   | 227.5 Detected   | 220.3 Detected   | 233.4 Detected   | Serpina11     | 1.332952599 | 1.25813821 | 1.02593407 | 0.9683516 |
| A_55_P2047 | 35132.2 Detected | 42551.6 Detected | 31198.5 Detected | 46828.3 Detected | Pop7          | 1.332916811 | 0.88803149 | 1.10050621 | 0.7331922 |
| A_55_P2083 | 4293.1 Detected  | 5280.2 Detected  | 4726.9 Detected  | 5722.2 Detected  | Scfd1         | 1.332882998 | 1.10104586 | 1.08370895 | 0.8952123 |
| A_55_P2210 | 8876.3 Detected  | 9317.1 Detected  | 7987.9 Detected  | 11830.5 Detected | Get4          | 1.332818855 | 0.89991325 | 1.26976205 | 0.8573376 |
| A_51_P4674 | 2760.4 Detected  | 2720.7 Detected  | 2510.4 Detected  | 3678.9 Detected  | Pif1          | 1.332741632 | 0.90943342 | 1.35218877 | 0.9227037 |
| A_55_P1959 | 464.8 Detected   | 424 Detected     | 443.2 Detected   | 619.3 Detected   | Rltpr         | 1.332401033 | 0.9535284  | 1.46061321 | 1.045283  |
| A_51_P4488 | 71.3 Detected    | 58 Detected      | 68.3 Detected    | 95 Detected      | Elf4          | 1.332398317 | 0.95792426 | 1.63793103 | 1.1775862 |
| A_55_P2103 | 104.7 Detected   | 507 Detected     | 24.2 Detected    | 139.5 Detected   | Gbp4          | 1.332378223 | 0.23113658 | 0.27514793 | 0.0477318 |
| A_52_P5690 | 4429.8 Detected  | 6183.7 Detected  | 5565.8 Detected  | 5902.1 Detected  | Cnot2         | 1.332362635 | 1.25644499 | 0.95446092 | 0.900076  |
| A_55_P1990 | 34.3 Detected    | 28.3 Detected    | 40.9 Detected    | 45.7 Detected    | Bai1          | 1.332361516 | 1.19241983 | 1.61484099 | 1.4452297 |
| A_52_P4380 | 2949.2 Detected  | 2496.1 Detected  | 3907.2 Detected  | 3929.2 Detected  | Cebpg         | 1.332293503 | 1.32483385 | 1.57413565 | 1.5653219 |
| A_55_P1992 | 809.9 Detected   | 752.7 Detected   | 887.1 Detected   | 1079 Detected    | Col4a3bp      | 1.332263242 | 1.09532041 | 1.43350604 | 1.1785572 |
| A_51_P2721 | 3155.5 Detected  | 4246 Detected    | 4747.9 Detected  | 4203.8 Detected  | Cirbp         | 1.332213595 | 1.50464269 | 0.99006123 | 1.1182054 |
| A_55_P2045 | 16472.9 Detected | 17484 Detected   | 19234.2 Detected | 21945.3 Detected | Tmem59        | 1.33220623  | 1.16762683 | 1.25516472 | 1.100103  |
| A_55_P2281 | 620.4 Detected   | 551.1 Detected   | 490.7 Detected   | 826.5 Detected   | 2610002M06Rik | 1.332205029 | 0.79094133 | 1.49972782 | 0.890401  |
| A_51_P5208 | 17803.3 Detected | 21010.5 Detected | 21760.8 Detected | 23715.9 Detected | Gm12060       | 1.332106969 | 1.22229025 | 1.12876419 | 1.0357107 |
| A_51_P1856 | 169 Detected     | 183.5 Detected   | 264.5 Detected   | 225.1 Detected   | Slc2a2        | 1.331952663 | 1.56508876 | 1.226703   | 1.4414169 |
| A_55_P2154 | 23.2 Detected    | 26.4 Detected    | 24.9 Detected    | 30.9 Not Detect  | Cd8b1         | 1.331896552 | 1.07327586 | 1.17045455 | 0.9431818 |
| A_55_P2140 | 7276.4 Detected  | 7806.8 Detected  | 7603.6 Detected  | 9689 Detected    | Flcn          | 1.33156506  | 1.04496729 | 1.2410975  | 0.9739714 |
| A_66_P1241 | 726.9 Detected   | 639.4 Detected   | 699.2 Detected   | 967.9 Detected   | Ttc16         | 1.331544917 | 0.96189297 | 1.5137629  | 1.0935252 |
| A_55_P1966 | 5243.7 Detected  | 10370.9 Detected | 7580.1 Detected  | 6981.6 Detected  | Krt81         | 1.331426283 | 1.44556325 | 0.67319133 | 0.7309009 |
| A_51_P3312 | 2042.8 Detected  | 3015 Detected    | 797.6 Detected   | 2719.7 Detected  | Tmem218       | 1.331358919 | 0.39044449 | 0.90205638 | 0.2645439 |
| A_55_P2151 | 55141.6 Detected | 60567.4 Detected | 51504.4 Detected | 73400.4 Detected | Elovl1        | 1.331125684 | 0.93403891 | 1.21187966 | 0.850365  |

|            |         |            |         |          |         |            |         |            |               |             |            |            |           |
|------------|---------|------------|---------|----------|---------|------------|---------|------------|---------------|-------------|------------|------------|-----------|
| A_52_P1891 | 2880.6  | Detected   | 3414.4  | Detected | 3114.8  | Detected   | 3834    | Detected   | Thap1         | 1.330972714 | 1.08130251 | 1.12289128 | 0.912254  |
| A_55_P2026 | 9986.7  | Detected   | 13781.4 | Detected | 8808.1  | Detected   | 13290.5 | Detected   | Usp11         | 1.330819991 | 0.88198304 | 0.96437953 | 0.6391296 |
| A_52_P5102 | 2305.8  | Detected   | 2678.7  | Detected | 1383.3  | Detected   | 3068.6  | Detected   | Ralgapa1      | 1.330817937 | 0.59992194 | 1.14555568 | 0.5164072 |
| A_52_P1831 | 115.8   | Detected   | 93.8    | Detected | 108.4   | Detected   | 154.1   | Detected   | Zfp60         | 1.33074266  | 0.93609672 | 1.64285714 | 1.1556503 |
| A_55_P2393 | 36.9    | Detected   | 36.9    | Detected | 30.3    | Detected   | 49.1    | Not Detect | A430106G13Rik | 1.330623306 | 0.82113821 | 1.33062331 | 0.8211382 |
| A_55_P2095 | 5656.8  | Detected   | 4957.5  | Detected | 5566    | Detected   | 7526.3  | Detected   | Akr1b10       | 1.330487201 | 0.98394852 | 1.5181644  | 1.1227433 |
| A_51_P2268 | 1145.6  | Detected   | 1281.2  | Detected | 1455.8  | Detected   | 1524.2  | Detected   | Gga1          | 1.330481844 | 1.27077514 | 1.18966594 | 1.1362785 |
| A_55_P2074 | 3529.5  | Detected   | 3375.4  | Detected | 3274.8  | Detected   | 4694.6  | Detected   | Zfp609        | 1.330103414 | 0.9278368  | 1.39082775 | 0.9701961 |
| A_55_P2467 | 887.1   | Detected   | 1277.5  | Detected | 813.6   | Detected   | 1179.9  | Detected   | Srp54a        | 1.330064254 | 0.91714576 | 0.92360078 | 0.6368689 |
| A_55_P1970 | 16592.2 | Detected   | 16498   | Detected | 17890.2 | Detected   | 22068.6 | Detected   | Unc45a        | 1.330058702 | 1.07822953 | 1.33765305 | 1.084386  |
| A_55_P2383 | 161     | Detected   | 108.3   | Detected | 109.1   | Detected   | 214.1   | Detected   | 2810040C05Rik | 1.329813665 | 0.67763975 | 1.97691597 | 1.0073869 |
| A_55_P2035 | 22101.9 | Detected   | 28370.2 | Detected | 18470.9 | Detected   | 29387.4 | Detected   | Haus8         | 1.329632294 | 0.83571548 | 1.03585452 | 0.651067  |
| A_55_P2010 | 1421.8  | Detected   | 1084.9  | Detected | 1866.3  | Detected   | 1890.4  | Detected   | Zfp688        | 1.32958222  | 1.31263188 | 1.74246474 | 1.7202507 |
| A_52_P4094 | 53.1    | Detected   | 54.9    | Detected | 49.9    | Detected   | 70.6    | Detected   | Ppcdc         | 1.329566855 | 0.93973635 | 1.2859745  | 0.9089253 |
| A_55_P1996 | 147.2   | Detected   | 104.6   | Detected | 132.1   | Detected   | 195.7   | Detected   | 5033417F24Rik | 1.329483696 | 0.89741848 | 1.8709369  | 1.2629063 |
| A_51_P1111 | 4064.1  | Detected   | 9139.4  | Detected | 4253.9  | Detected   | 5403.1  | Detected   | Rnd1          | 1.329470239 | 1.04670161 | 0.59118761 | 0.4654463 |
| A_51_P3244 | 2844.3  | Detected   | 3090.4  | Detected | 2488.4  | Detected   | 3781.1  | Detected   | Wdr35         | 1.329360475 | 0.87487255 | 1.22349858 | 0.8052032 |
| A_55_P2030 | 65.9    | Detected   | 61.4    | Detected | 58.4    | Detected   | 87.6    | Detected   | A430033K04Rik | 1.329286798 | 0.8861912  | 1.4267101  | 0.9511401 |
| A_55_P1961 | 27322.9 | Detected   | 43336.5 | Detected | 28983.5 | Detected   | 36319.8 | Detected   | Gm11974       | 1.329280567 | 1.06077686 | 0.83808799 | 0.6688011 |
| A_52_P2233 | 201.2   | Detected   | 206     | Detected | 186.3   | Detected   | 267.4   | Detected   | Akap10        | 1.329025845 | 0.92594433 | 1.29805825 | 0.9043689 |
| A_55_P2096 | 3198.3  | Detected   | 2290.9  | Detected | 4173.6  | Detected   | 4250.5  | Detected   | Tprn          | 1.328987274 | 1.30494325 | 1.85538435 | 1.8218168 |
| A_55_P1962 | 8816.2  | Detected   | 8947.6  | Detected | 10291.4 | Detected   | 11715.7 | Detected   | Anxa7         | 1.328883192 | 1.16732833 | 1.30936788 | 1.1501855 |
| A_55_P1984 | 3275.4  | Detected   | 3206.8  | Detected | 2283    | Detected   | 4352.6  | Detected   | Usp48         | 1.328875862 | 0.69701411 | 1.35730323 | 0.7119247 |
| A_51_P2605 | 16748.9 | Detected   | 17663.5 | Detected | 12290.1 | Detected   | 22257   | Detected   | Glg1          | 1.328863388 | 0.7337855  | 1.26005605 | 0.6957908 |
| A_55_P2125 | 2264.2  | Detected   | 2098.9  | Detected | 2553.4  | Detected   | 3008.8  | Detected   | Gpatch1       | 1.328857875 | 1.12772723 | 1.43351279 | 1.216542  |
| A_55_P2054 | 315.1   | Detected   | 397     | Detected | 275.4   | Detected   | 418.7   | Detected   | Adprm         | 1.328784513 | 0.87400825 | 1.05465995 | 0.6937028 |
| A_51_P4722 | 16078.3 | Detected   | 22372.1 | Detected | 16932   | Detected   | 21364.5 | Detected   | Slc7a7        | 1.32877854  | 1.05309641 | 0.95496176 | 0.7568355 |
| A_52_P6727 | 672.3   | Detected   | 569.5   | Detected | 540     | Detected   | 893.3   | Detected   | Rala          | 1.328722297 | 0.80321285 | 1.56856892 | 0.9482002 |
| A_55_P1955 | 802.9   | Detected   | 625.4   | Detected | 913.8   | Detected   | 1066.8  | Detected   | Camk2d        | 1.328683522 | 1.1381243  | 1.7057883  | 1.4611449 |
| A_55_P2372 | 7       | Not Detect | 18.2    | Detected | 8.2     | Not Detect | 9.3     | Not Detect | 4833441D16Rik | 1.328571429 | 1.17142857 | 0.51098901 | 0.4505495 |
| A_55_P2049 | 70446.2 | Detected   | 82990.8 | Detected | 68409.3 | Detected   | 93574.5 | Detected   | Gm3201        | 1.328311534 | 0.97108574 | 1.12752859 | 0.8242998 |
| A_51_P4727 | 6462.2  | Detected   | 4607.2  | Detected | 13719.7 | Detected   | 8583.8  | Detected   | Pdlim2        | 1.328309245 | 2.12306954 | 1.86312728 | 2.9778824 |
| A_51_P5152 | 19.5    | Detected   | 27.3    | Detected | 28.5    | Detected   | 25.9    | Not Detect | Strip2        | 1.328205128 | 1.46153846 | 0.94871795 | 1.043956  |
| A_55_P2009 | 19933.3 | Detected   | 28671.2 | Detected | 24656.6 | Detected   | 26475.3 | Detected   | Gm8709        | 1.328194529 | 1.23695525 | 0.92341095 | 0.859978  |
| A_51_P4866 | 2379.7  | Detected   | 2889.3  | Detected | 2107    | Detected   | 3160.5  | Detected   | Afg3l1        | 1.328108585 | 0.88540572 | 1.09386357 | 0.7292424 |
| A_55_P2379 | 57      | Detected   | 44.4    | Detected | 39.6    | Detected   | 75.7    | Detected   | BC037438      | 1.328070175 | 0.69473684 | 1.70495495 | 0.8918919 |
| A_55_P1981 | 1764.3  | Detected   | 2034.6  | Detected | 2066.8  | Detected   | 2343.1  | Detected   | Fkbp14        | 1.328062121 | 1.1714561  | 1.15162686 | 1.0158262 |
| A_55_P2023 | 268.3   | Detected   | 345.1   | Detected | 271.9   | Detected   | 356.3   | Detected   | Oog2          | 1.327991055 | 1.01341782 | 1.03245436 | 0.7878876 |
| A_55_P2000 | 520.3   | Detected   | 639.7   | Detected | 488.3   | Detected   | 690.9   | Detected   | Polk          | 1.327887757 | 0.93849702 | 1.08003752 | 0.7633266 |
| A_55_P2020 | 334.1   | Detected   | 1430.5  | Detected | 267.2   | Detected   | 443.6   | Detected   | Tmem179       | 1.327746184 | 0.79976055 | 0.31010136 | 0.1867878 |

|            |         |          |         |          |         |          |         |          |               |             |            |            |           |
|------------|---------|----------|---------|----------|---------|----------|---------|----------|---------------|-------------|------------|------------|-----------|
| A_51_P4170 | 24426   | Detected | 25969.9 | Detected | 26343.7 | Detected | 32431.3 | Detected | Tuft1         | 1.327736838 | 1.0785106  | 1.24880342 | 1.0143936 |
| A_51_P4687 | 1847.6  | Detected | 1560.3  | Detected | 1760.3  | Detected | 2453.1  | Detected | Hmg20a        | 1.327722451 | 0.95274951 | 1.57219765 | 1.1281805 |
| A_51_P4300 | 3641.9  | Detected | 4534    | Detected | 6905.8  | Detected | 4835.3  | Detected | Tst           | 1.327686098 | 1.89620802 | 1.06645346 | 1.5231142 |
| A_52_P5607 | 2915.7  | Detected | 2753.8  | Detected | 4097.9  | Detected | 3871.1  | Detected | Serhl         | 1.327674315 | 1.4054601  | 1.40573026 | 1.4880892 |
| A_51_P1070 | 7906.6  | Detected | 7699.2  | Detected | 10965.1 | Detected | 10497   | Detected | BC031181      | 1.327625022 | 1.38682873 | 1.3633884  | 1.4241869 |
| A_51_P3511 | 442.6   | Detected | 374.9   | Detected | 375.7   | Detected | 587.6   | Detected | Tbce          | 1.32760958  | 0.84884772 | 1.56735129 | 1.0021339 |
| A_55_P2017 | 290.3   | Detected | 257.2   | Detected | 421.2   | Detected | 385.4   | Detected | Nup188        | 1.327592146 | 1.45091285 | 1.49844479 | 1.6376361 |
| A_55_P2092 | 4342.9  | Detected | 4482.9  | Detected | 4151.4  | Detected | 5765.5  | Detected | Slc45a3       | 1.327569136 | 0.95590504 | 1.28610944 | 0.9260523 |
| A_55_P2133 | 246.7   | Detected | 283.5   | Detected | 238.1   | Detected | 327.5   | Detected | Prss48        | 1.327523308 | 0.96513985 | 1.15520282 | 0.8398589 |
| A_55_P1959 | 534.5   | Detected | 573     | Detected | 479.3   | Detected | 709.4   | Detected | BC080695      | 1.327221703 | 0.89672591 | 1.23804538 | 0.8364747 |
| A_55_P2051 | 1526.9  | Detected | 1807.7  | Detected | 1703.7  | Detected | 2026.4  | Detected | Atp2c1        | 1.327133408 | 1.11579016 | 1.12098246 | 0.9424683 |
| A_55_P2073 | 446.4   | Detected | 367.8   | Detected | 600.2   | Detected | 592.4   | Detected | Syn1          | 1.327060932 | 1.34453405 | 1.61065797 | 1.6318651 |
| A_55_P2006 | 1107.4  | Detected | 1156.6  | Detected | 1536.8  | Detected | 1469.5  | Detected | Pik3c3        | 1.32698212  | 1.3877551  | 1.27053432 | 1.3287221 |
| A_51_P2877 | 67.6    | Detected | 85.4    | Detected | 102.3   | Detected | 89.7    | Detected | Zscan2        | 1.326923077 | 1.51331361 | 1.05035129 | 1.1978923 |
| A_55_P2075 | 6321.7  | Detected | 7409.5  | Detected | 10731.4 | Detected | 8387.1  | Detected | Tmem216       | 1.326715915 | 1.69754971 | 1.13193873 | 1.4483298 |
| A_52_P2533 | 1555.8  | Detected | 1825.9  | Detected | 1904.3  | Detected | 2064.1  | Detected | 4930481A15Rik | 1.326712945 | 1.22400051 | 1.13045621 | 1.0429377 |
| A_55_P2091 | 2853.6  | Detected | 1845.3  | Detected | 1133    | Detected | 3785.9  | Detected | Hipk2         | 1.326710121 | 0.39704233 | 2.05164472 | 0.6139923 |
| A_51_P4185 | 3210.9  | Detected | 2686.3  | Detected | 2595.6  | Detected | 4259.8  | Detected | Lnx2          | 1.326668535 | 0.80837148 | 1.58574992 | 0.9662361 |
| A_55_P1989 | 2907.7  | Detected | 3429.9  | Detected | 3937.9  | Detected | 3857.5  | Detected | Elf1          | 1.326649929 | 1.35430065 | 1.12466836 | 1.1481093 |
| A_52_P4218 | 97.1    | Detected | 129.9   | Detected | 50.6    | Detected | 128.8   | Detected | Morc4         | 1.326467559 | 0.52111226 | 0.99153195 | 0.3895304 |
| A_55_P1970 | 1050.6  | Detected | 1844.3  | Detected | 1238.7  | Detected | 1393.5  | Detected | Pemt          | 1.326384923 | 1.17904055 | 0.75557122 | 0.6716369 |
| A_55_P2151 | 10696.7 | Detected | 10196.1 | Detected | 10380.5 | Detected | 14187.5 | Detected | Phactr4       | 1.326343639 | 0.97043948 | 1.3914634  | 1.0180853 |
| A_55_P1956 | 1116.5  | Detected | 1042.8  | Detected | 1392.7  | Detected | 1480.8  | Detected | Stam          | 1.326287506 | 1.24738021 | 1.42002301 | 1.3355389 |
| A_55_P1957 | 14309.2 | Detected | 12427.1 | Detected | 15561.5 | Detected | 18977.9 | Detected | Sgk3          | 1.326272608 | 1.08751712 | 1.52713827 | 1.252223  |
| A_55_P2007 | 9171    | Detected | 8737.4  | Detected | 8362.2  | Detected | 12163   | Detected | Lrsam1        | 1.326245775 | 0.91180896 | 1.39206171 | 0.9570582 |
| A_55_P2253 | 8149.3  | Detected | 9948.1  | Detected | 8495.8  | Detected | 10807.6 | Detected | Galnt7        | 1.326199796 | 1.04251899 | 1.08639841 | 0.8540123 |
| A_51_P3767 | 1722.3  | Detected | 1702.5  | Detected | 1311.8  | Detected | 2284    | Detected | Athl1         | 1.326133658 | 0.76165593 | 1.34155653 | 0.770514  |
| A_51_P3896 | 5742.7  | Detected | 4514.9  | Detected | 8500.3  | Detected | 7615.4  | Detected | Kcnn4         | 1.326100963 | 1.48019224 | 1.68672617 | 1.8827217 |
| A_55_P2169 | 2118.7  | Detected | 2500.1  | Detected | 2223.6  | Detected | 2809.6  | Detected | Nanos3        | 1.326096191 | 1.04951149 | 1.12379505 | 0.8894044 |
| A_51_P5196 | 78.2    | Detected | 89.4    | Detected | 84.5    | Detected | 103.7   | Detected | Mical3        | 1.326086957 | 1.08056266 | 1.15995526 | 0.9451902 |
| A_55_P2183 | 1272.5  | Detected | 1206.1  | Detected | 1433.1  | Detected | 1687.4  | Detected | 2610015P09Rik | 1.326051081 | 1.12620825 | 1.3990548  | 1.1882099 |
| A_55_P2206 | 379.2   | Detected | 337.5   | Detected | 224.7   | Detected | 502.8   | Detected | 5830444B04Rik | 1.325949367 | 0.59256329 | 1.48977778 | 0.6657778 |
| A_55_P2081 | 45.1    | Detected | 45.8    | Detected | 35.4    | Detected | 59.8    | Detected | Kcraj13       | 1.32594235  | 0.78492239 | 1.30567686 | 0.7729258 |
| A_55_P2322 | 258.4   | Detected | 271.9   | Detected | 300.3   | Detected | 342.6   | Detected | Gm16853       | 1.325851393 | 1.1621517  | 1.26002207 | 1.1044502 |
| A_55_P1962 | 1361.3  | Detected | 1995.5  | Detected | 1004.1  | Detected | 1804.8  | Detected | Hist2h2aa2    | 1.325791523 | 0.73760376 | 0.90443498 | 0.5031822 |
| A_51_P3286 | 50002.6 | Detected | 46851.4 | Detected | 49342.6 | Detected | 66286.9 | Detected | Acot7         | 1.325669065 | 0.98680069 | 1.41483285 | 1.0531724 |
| A_55_P2163 | 1777.7  | Detected | 1842.9  | Detected | 1524.4  | Detected | 2356.5  | Detected | Tm4sf5        | 1.325589245 | 0.85751252 | 1.27869119 | 0.8271746 |
| A_66_P1141 | 24212   | Detected | 23077.2 | Detected | 33676.1 | Detected | 32091.6 | Detected | Zfp36l2       | 1.32544193  | 1.39088469 | 1.39061931 | 1.4592802 |
| A_51_P2463 | 2079.3  | Detected | 1648.7  | Detected | 1904.6  | Detected | 2755.9  | Detected | Nktr          | 1.32539797  | 0.91598134 | 1.67155941 | 1.1552132 |
| A_55_P1995 | 3205.2  | Detected | 3889.3  | Detected | 3157.6  | Detected | 4248.1  | Detected | Atad3a        | 1.325377512 | 0.98514913 | 1.0922531  | 0.8118685 |

|            |         |            |         |            |         |            |         |            |               |             |            |            |           |
|------------|---------|------------|---------|------------|---------|------------|---------|------------|---------------|-------------|------------|------------|-----------|
| A_55_P2024 | 1192.7  | Detected   | 1351.6  | Detected   | 1362.8  | Detected   | 1580.7  | Detected   | Cep5711       | 1.325312317 | 1.14261759 | 1.16950281 | 1.0082865 |
| A_55_P2181 | 62.1    | Detected   | 59.8    | Detected   | 67.2    | Detected   | 82.3    | Detected   | Dennd1b       | 1.325281804 | 1.0821256  | 1.37625418 | 1.1237458 |
| A_51_P3317 | 172.5   | Detected   | 219.3   | Detected   | 255.8   | Detected   | 228.6   | Detected   | Fam151b       | 1.325217391 | 1.48289855 | 1.04240766 | 1.1664387 |
| A_55_P1983 | 276.8   | Detected   | 275.8   | Detected   | 303.8   | Detected   | 366.8   | Detected   | Gm4593        | 1.325144509 | 1.09754335 | 1.32994924 | 1.1015228 |
| A_51_P1588 | 51475   | Detected   | 64945.3 | Detected   | 70758   | Detected   | 68203.4 | Detected   | Dctpp1        | 1.324981059 | 1.37460903 | 1.05016683 | 1.0895015 |
| A_52_P2672 | 49670.8 | Detected   | 63634.3 | Detected   | 54677.8 | Detected   | 65811.4 | Detected   | LOC100861738  | 1.324951481 | 1.10080369 | 1.03421268 | 0.8592504 |
| A_55_P1996 | 27032.7 | Detected   | 27227.7 | Detected   | 36187.7 | Detected   | 35814.4 | Detected   | Gm16381       | 1.324854713 | 1.33866391 | 1.31536634 | 1.3290766 |
| A_55_P2150 | 128.4   | Detected   | 145.6   | Detected   | 69.3    | Detected   | 170.1   | Detected   | Gzmm          | 1.324766355 | 0.53971963 | 1.16826923 | 0.4759615 |
| A_52_P7243 | 13309.1 | Detected   | 15634.4 | Detected   | 17362.6 | Detected   | 17631.1 | Detected   | Khk           | 1.324740215 | 1.30456605 | 1.12771197 | 1.1105383 |
| A_55_P2157 | 406.2   | Detected   | 457.6   | Detected   | 1276.3  | Detected   | 538.1   | Detected   | Neu2          | 1.324716888 | 3.14204825 | 1.17591783 | 2.7891171 |
| A_55_P2227 | 683.9   | Detected   | 716.9   | Detected   | 483.7   | Detected   | 905.9   | Detected   | A530041M06Rik | 1.324608861 | 0.70726714 | 1.2636351  | 0.6747106 |
| A_55_P2104 | 4404.3  | Detected   | 5264.4  | Detected   | 4580.5  | Detected   | 5833.4  | Detected   | Ttc33         | 1.324478351 | 1.04000636 | 1.10808449 | 0.8700897 |
| A_51_P4328 | 8102.2  | Detected   | 8472.5  | Detected   | 12634   | Detected   | 10730.6 | Detected   | Rbm4          | 1.324405717 | 1.55932956 | 1.2665211  | 1.4911773 |
| A_52_P6476 | 510     | Detected   | 435     | Detected   | 453.5   | Detected   | 675.4   | Detected   | Ubr4          | 1.324313725 | 0.88921569 | 1.55264368 | 1.0425287 |
| A_51_P2706 | 13862.6 | Detected   | 19312.3 | Detected   | 13089.9 | Detected   | 18357.9 | Detected   | Usp11         | 1.324275388 | 0.9442601  | 0.95058072 | 0.6778012 |
| A_55_P2006 | 39899   | Detected   | 38291.6 | Detected   | 44205.6 | Detected   | 52835.5 | Detected   | Ogdh          | 1.324231184 | 1.10793754 | 1.37981959 | 1.1544464 |
| A_66_P1203 | 12319.2 | Detected   | 13342   | Detected   | 11265.2 | Detected   | 16312.9 | Detected   | Sstr5         | 1.324185012 | 0.9144425  | 1.22267276 | 0.8443412 |
| A_55_P1969 | 112.9   | Detected   | 95.1    | Detected   | 78.5    | Detected   | 149.5   | Detected   | Lynx1         | 1.324180691 | 0.69530558 | 1.57202944 | 0.8254469 |
| A_55_P1996 | 14.5    | Detected   | 8.7     | Not Detect | 10.1    | Not Detect | 19.2    | Not Detect | 9430078G10Rik | 1.324137931 | 0.69655172 | 2.20689655 | 1.1609195 |
| A_55_P2204 | 29      | Detected   | 23.5    | Detected   | 14.3    | Not Detect | 38.4    | Not Detect | 6030458E02Rik | 1.324137931 | 0.49310345 | 1.63404255 | 0.6085106 |
| A_66_P1246 | 14.5    | Detected   | 17.3    | Detected   | 13.3    | Not Detect | 19.2    | Not Detect | Ipcef1        | 1.324137931 | 0.91724138 | 1.10982659 | 0.7687861 |
| A_51_P1265 | 1288.9  | Detected   | 1621.6  | Detected   | 1276.8  | Detected   | 1706.6  | Detected   | D230025D16Rik | 1.324074792 | 0.99061215 | 1.05241737 | 0.7873705 |
| A_51_P2239 | 1030.2  | Detected   | 981.4   | Detected   | 818.2   | Detected   | 1364    | Detected   | Ash11         | 1.324014754 | 0.79421472 | 1.38985123 | 0.8337069 |
| A_55_P2279 | 64.2    | Detected   | 67      | Detected   | 80.8    | Detected   | 85      | Detected   | C79015        | 1.323987539 | 1.25856698 | 1.26865672 | 1.2059701 |
| A_51_P2213 | 3538.4  | Detected   | 4193.9  | Detected   | 2959.8  | Detected   | 4684.7  | Detected   | Ranbp10       | 1.323959982 | 0.83647976 | 1.11702711 | 0.7057393 |
| A_51_P4980 | 20907.7 | Detected   | 19388.5 | Detected   | 28212.5 | Detected   | 27680.9 | Detected   | Scyl1         | 1.323957202 | 1.34938324 | 1.42769683 | 1.4551151 |
| A_51_P4409 | 7.1     | Not Detect | 56.2    | Detected   | 9.8     | Not Detect | 9.4     | Not Detect | Fgf15         | 1.323943662 | 1.38028169 | 0.16725979 | 0.1743772 |
| A_51_P3039 | 16597.2 | Detected   | 16832.6 | Detected   | 15560.7 | Detected   | 21972.8 | Detected   | Actr2         | 1.323885957 | 0.93754971 | 1.30537172 | 0.9244383 |
| A_55_P2163 | 282     | Detected   | 212.4   | Detected   | 215.8   | Detected   | 373.3   | Detected   | LOC386400     | 1.323758865 | 0.76524823 | 1.75753296 | 1.0160075 |
| A_55_P2084 | 93.6    | Detected   | 110.6   | Detected   | 92.1    | Detected   | 123.9   | Detected   | Klk12         | 1.323717949 | 0.98397436 | 1.12025316 | 0.8327306 |
| A_55_P2065 | 11698.8 | Detected   | 11170.8 | Detected   | 15210.2 | Detected   | 15485.8 | Detected   | Setd3         | 1.323708415 | 1.30015044 | 1.38627493 | 1.3616035 |
| A_51_P1849 | 26876.4 | Detected   | 24458.4 | Detected   | 47911.8 | Detected   | 35576.4 | Detected   | Phpt1         | 1.323704068 | 1.78267179 | 1.45456776 | 1.9589098 |
| A_51_P4531 | 6.8     | Not Detect | 817.3   | Detected   | 3.2     | Not Detect | 9       | Not Detect | Brinp3        | 1.323529412 | 0.47058824 | 0.01101187 | 0.0039153 |
| A_52_P4990 | 1339    | Detected   | 1927.9  | Detected   | 1434.5  | Detected   | 1772.2  | Detected   | 9130008F23Rik | 1.323525019 | 1.07132188 | 0.91923855 | 0.7440739 |
| A_65_P1352 | 1440.5  | Detected   | 3047    | Detected   | 1193.1  | Detected   | 1906.5  | Detected   | Osbpl8        | 1.323498785 | 0.82825408 | 0.62569741 | 0.3915655 |
| A_55_P2086 | 3326.4  | Detected   | 3758.8  | Detected   | 2549.1  | Detected   | 4402.3  | Detected   | Nfib          | 1.323442761 | 0.76632395 | 1.17119825 | 0.6781686 |
| A_51_P3828 | 43.3    | Detected   | 55.2    | Detected   | 46      | Detected   | 57.3    | Detected   | Zbbp2         | 1.323325635 | 1.06235566 | 1.03804348 | 0.8333333 |
| A_51_P4860 | 724.5   | Detected   | 648.6   | Detected   | 622.3   | Detected   | 958.7   | Detected   | Mob3a         | 1.323257419 | 0.8589372  | 1.47810669 | 0.9594511 |
| A_55_P2134 | 19.8    | Detected   | 6.6     | Not Detect | 23.7    | Detected   | 26.2    | Not Detect | Ms4a13        | 1.323232323 | 1.1969697  | 3.96969697 | 3.5909091 |
| A_66_P1236 | 548.3   | Detected   | 540.8   | Detected   | 881     | Detected   | 725.3   | Detected   | Nabp1         | 1.322815977 | 1.60678461 | 1.34116124 | 1.629068  |



|            |         |          |         |          |         |          |         |            |               |             |            |            |           |
|------------|---------|----------|---------|----------|---------|----------|---------|------------|---------------|-------------|------------|------------|-----------|
| A_51_P4186 | 1108.7  | Detected | 1074.5  | Detected | 1157.1  | Detected | 1466.6  | Detected   | Vps37c        | 1.322810499 | 1.04365473 | 1.36491391 | 1.076873  |
| A_51_P2282 | 1769.9  | Detected | 1882.8  | Detected | 1818.9  | Detected | 2341.2  | Detected   | Gbas          | 1.322786598 | 1.02768518 | 1.24346718 | 0.9660612 |
| A_51_P2599 | 8209.8  | Detected | 13992.8 | Detected | 5161    | Detected | 10859.4 | Detected   | Aspa          | 1.322736242 | 0.62863894 | 0.77607055 | 0.3688325 |
| A_55_P2241 | 109.7   | Detected | 136.7   | Detected | 119.1   | Detected | 145.1   | Detected   | 1500015A07Rik | 1.322698268 | 1.08568824 | 1.06144843 | 0.8712509 |
| A_51_P1214 | 3221.2  | Detected | 3301.3  | Detected | 4771.8  | Detected | 4260.5  | Detected   | Slc25a39      | 1.322643735 | 1.4813734  | 1.29055221 | 1.4454306 |
| A_66_P1367 | 34431.9 | Detected | 28440.3 | Detected | 38823.1 | Detected | 45538.1 | Detected   | Ubald2        | 1.322555537 | 1.1275329  | 1.60118213 | 1.3650735 |
| A_51_P2431 | 27.3    | Detected | 25.8    | Detected | 33.7    | Detected | 36.1    | Not Detect | Sec14l3       | 1.322344322 | 1.23443223 | 1.39922481 | 1.3062016 |
| A_55_P2069 | 21534   | Detected | 23809.8 | Detected | 26247.7 | Detected | 28473.8 | Detected   | Tnpo3         | 1.322271756 | 1.2188957  | 1.19588573 | 1.1023906 |
| A_55_P2006 | 200.8   | Detected | 206.8   | Detected | 265.4   | Detected | 265.5   | Detected   | Eif4e2        | 1.322211155 | 1.32171315 | 1.28384913 | 1.2833656 |
| A_51_P3277 | 19630.3 | Detected | 17802.4 | Detected | 15347.2 | Detected | 25955.2 | Detected   | Itgb5         | 1.322200883 | 0.78181179 | 1.45796072 | 0.862086  |
| A_55_P2090 | 47.5    | Detected | 43.6    | Detected | 41      | Detected | 62.8    | Detected   | Vmn2r121      | 1.322105263 | 0.86315789 | 1.44036697 | 0.940367  |
| A_51_P2677 | 139.4   | Detected | 114.5   | Detected | 128.3   | Detected | 184.3   | Detected   | Gkn3          | 1.322094692 | 0.92037303 | 1.60960699 | 1.120524  |
| A_52_P6190 | 367.7   | Detected | 367.4   | Detected | 334     | Detected | 486.1   | Detected   | Atp8b5        | 1.322001632 | 0.9083492  | 1.32308111 | 0.9090909 |
| A_55_P2027 | 29454.3 | Detected | 26125.4 | Detected | 27256.8 | Detected | 38937.6 | Detected   | Mrps18c       | 1.321966572 | 0.9253929  | 1.49041163 | 1.0433065 |
| A_55_P2093 | 1286.8  | Detected | 1503.3  | Detected | 1507.4  | Detected | 1701.1  | Detected   | Mphosph10     | 1.321961455 | 1.17143301 | 1.1315772  | 1.0027273 |
| A_55_P2009 | 455     | Detected | 379.9   | Detected | 480.5   | Detected | 601.4   | Detected   | Stxbp3a       | 1.321758242 | 1.05604396 | 1.58304817 | 1.2648065 |
| A_55_P2061 | 21653.9 | Detected | 24485.7 | Detected | 21629.9 | Detected | 28620.2 | Detected   | Ing1          | 1.321711101 | 0.99889165 | 1.16885366 | 0.8833687 |
| A_55_P1980 | 25.8    | Detected | 20.3    | Detected | 19.4    | Detected | 34.1    | Not Detect | Lca5l         | 1.321705426 | 0.75193798 | 1.67980296 | 0.955665  |
| A_52_P2649 | 4923    | Detected | 5553.4  | Detected | 6036.8  | Detected | 6506.3  | Detected   | Cab39l        | 1.321612838 | 1.22624416 | 1.17158858 | 1.0870458 |
| A_55_P2110 | 19804.7 | Detected | 22812.1 | Detected | 21752.2 | Detected | 26173   | Detected   | Lmo7          | 1.321554984 | 1.09833524 | 1.14732971 | 0.9535378 |
| A_55_P2049 | 101.1   | Detected | 162     | Detected | 88.7    | Detected | 133.6   | Detected   | Plvap         | 1.321463897 | 0.87734916 | 0.82469136 | 0.5475309 |
| A_55_P2129 | 67.2    | Detected | 55.5    | Detected | 68.6    | Detected | 88.8    | Detected   | Sh3pxd2a      | 1.321428571 | 1.02083333 | 1.6        | 1.236036  |
| A_66_P1408 | 3122.7  | Detected | 1852.1  | Detected | 3050.1  | Detected | 4126    | Detected   | Prr24         | 1.321292471 | 0.97675089 | 2.22774148 | 1.6468333 |
| A_51_P2304 | 4885.3  | Detected | 1555.1  | Detected | 6108.7  | Detected | 6454.8  | Detected   | Ppfibp2       | 1.321269932 | 1.25042474 | 4.15072986 | 3.9281718 |
| A_51_P1674 | 102.1   | Detected | 76.8    | Detected | 90.8    | Detected | 134.9   | Detected   | Herc1         | 1.321253673 | 0.88932419 | 1.75651042 | 1.1822917 |
| A_55_P2154 | 150.4   | Detected | 411.1   | Detected | 103     | Detected | 198.7   | Detected   | Acap1         | 1.321143617 | 0.68484043 | 0.48333739 | 0.2505473 |
| A_51_P1772 | 138.3   | Detected | 151.5   | Detected | 112.5   | Detected | 182.7   | Detected   | Stac3         | 1.321041215 | 0.81344902 | 1.20594059 | 0.7425743 |
| A_55_P2177 | 35.2    | Detected | 51      | Detected | 42.7    | Detected | 46.5    | Detected   | B130024G19Rik | 1.321022727 | 1.21306818 | 0.91176471 | 0.8372549 |
| A_55_P1998 | 15688.1 | Detected | 17324.4 | Detected | 19273.6 | Detected | 20723.5 | Detected   | Chchd3        | 1.320969397 | 1.22854903 | 1.19620304 | 1.1125118 |
| A_51_P2536 | 2731.3  | Detected | 2527.9  | Detected | 3003.4  | Detected | 3607.8  | Detected   | Rpain         | 1.320909457 | 1.09962289 | 1.42719253 | 1.1881008 |
| A_55_P2275 | 1695.8  | Detected | 1744.5  | Detected | 1803.5  | Detected | 2239.9  | Detected   | Nrap          | 1.320851516 | 1.06350985 | 1.28397822 | 1.0338206 |
| A_55_P2165 | 2271.8  | Detected | 2481.6  | Detected | 1698.1  | Detected | 3000.7  | Detected   | Aebp2         | 1.320846906 | 0.74746897 | 1.20917956 | 0.6842763 |
| A_55_P2130 | 228.8   | Detected | 230.8   | Detected | 206.9   | Detected | 302.2   | Detected   | Kcnab1        | 1.320804196 | 0.90428322 | 1.30935875 | 0.8964471 |
| A_51_P5056 | 63.6    | Detected | 58.1    | Detected | 42.4    | Detected | 84      | Detected   | Noxred1       | 1.320754717 | 0.66666667 | 1.44578313 | 0.7297762 |
| A_55_P2100 | 50.2    | Detected | 53.8    | Detected | 73      | Detected | 66.3    | Detected   | L1cam         | 1.320717131 | 1.45418327 | 1.23234201 | 1.3568773 |
| A_55_P2047 | 302.9   | Detected | 322.7   | Detected | 280.4   | Detected | 400     | Detected   | Gjc2          | 1.320567844 | 0.92571806 | 1.23954137 | 0.8689185 |
| A_55_P1959 | 1227.4  | Detected | 1627.6  | Detected | 1526.2  | Detected | 1620.8  | Detected   | Lrrfip1       | 1.32051491  | 1.24344142 | 0.99582207 | 0.9376997 |
| A_55_P1955 | 34859   | Detected | 41236.6 | Detected | 34146.9 | Detected | 46029.7 | Detected   | Atad3a        | 1.320453828 | 0.97957199 | 1.11623412 | 0.8280726 |
| A_55_P2099 | 15671.5 | Detected | 15670.2 | Detected | 16406.4 | Detected | 20693   | Detected   | Micu1         | 1.320422423 | 1.04689404 | 1.32053197 | 1.0469809 |
| A_66_P1285 | 194.5   | Detected | 409.9   | Detected | 71.2    | Detected | 256.8   | Detected   | Isg15         | 1.320308483 | 0.36606684 | 0.62649427 | 0.1737009 |

|            |                  |                   |                  |                   |               |             |            |            |           |
|------------|------------------|-------------------|------------------|-------------------|---------------|-------------|------------|------------|-----------|
| A_55_P2181 | 58.7 Detected    | 74.7 Detected     | 82.2 Detected    | 77.5 Detected     | Stpg2         | 1.320272572 | 1.40034072 | 1.03748327 | 1.1004016 |
| A_55_P2155 | 8540.8 Detected  | 8020.4 Detected   | 8305 Detected    | 11276 Detected    | Dock3         | 1.32025103  | 0.97239135 | 1.40591492 | 1.0354845 |
| A_55_P2397 | 50.9 Detected    | 45.1 Detected     | 50.1 Detected    | 67.2 Detected     | AI428406      | 1.320235756 | 0.98428291 | 1.49002217 | 1.1108647 |
| A_51_P3582 | 26505.7 Detected | 34691 Detected    | 34596.5 Detected | 34993.7 Detected  | Serinc1       | 1.320233006 | 1.30524755 | 1.00872561 | 0.997276  |
| A_55_P2118 | 3020.2 Detected  | 5554.9 Detected   | 3432 Detected    | 3987.3 Detected   | Rcor2         | 1.320210582 | 1.13634859 | 0.7177987  | 0.6178329 |
| A_52_P5275 | 2559 Detected    | 2720.6 Detected   | 2255.7 Detected  | 3378.4 Detected   | Helb          | 1.320203204 | 0.88147714 | 1.2417849  | 0.8291186 |
| A_55_P2017 | 218.3 Detected   | 192.2 Detected    | 283.3 Detected   | 288.2 Detected    | Gnb1l         | 1.320201557 | 1.29775538 | 1.49947971 | 1.4739854 |
| A_52_P3412 | 2943.9 Detected  | 3404.6 Detected   | 3754.6 Detected  | 3886.5 Detected   | Med17         | 1.320187506 | 1.275383   | 1.14154379 | 1.1028021 |
| A_55_P2411 | 7171.4 Detected  | 6237 Detected     | 6212.7 Detected  | 9467.4 Detected   | B230213L16Rik | 1.320160638 | 0.8663162  | 1.51794132 | 0.9961039 |
| A_55_P2178 | 961.9 Detected   | 1010.9 Detected   | 953.7 Detected   | 1269.8 Detected   | Cul4a         | 1.320095644 | 0.99147521 | 1.25610842 | 0.9434168 |
| A_51_P1592 | 1158 Detected    | 1424.6 Detected   | 1373.5 Detected  | 1528.6 Detected   | Bud13         | 1.320034542 | 1.18609672 | 1.07300295 | 0.9641303 |
| A_55_P2180 | 732.5 Detected   | 662.1 Detected    | 814.6 Detected   | 966.9 Detected    | Sik3          | 1.32        | 1.11208191 | 1.46035342 | 1.2303277 |
| A_55_P1989 | 5680.8 Detected  | 3724.7 Detected   | 4820.5 Detected  | 7497.3 Detected   | Lin54         | 1.319761301 | 0.84856006 | 2.0128601  | 1.2941982 |
| A_51_P2722 | 122.3 Detected   | 106.2 Detected    | 119.6 Detected   | 161.4 Detected    | Tmem89        | 1.319705642 | 0.97792314 | 1.51977401 | 1.126177  |
| A_52_P3817 | 242.8 Detected   | 396.3 Detected    | 8 Not Detect     | 320.4 Detected    | Neto2         | 1.319604613 | 0.03294893 | 0.80847843 | 0.0201867 |
| A_52_P2377 | 177.2 Detected   | 292 Detected      | 212.7 Detected   | 233.8 Detected    | Slc19a1       | 1.319413093 | 1.2003386  | 0.80068493 | 0.7284247 |
| A_55_P2086 | 509.8 Detected   | 531.2 Detected    | 420.6 Detected   | 672.6 Detected    | Nfib          | 1.319340918 | 0.82502942 | 1.26618976 | 0.7917922 |
| A_52_P1509 | 90.5 Detected    | 80.3 Detected     | 106.3 Detected   | 119.4 Detected    | Txndc11       | 1.319337017 | 1.17458564 | 1.48692403 | 1.3237858 |
| A_51_P2483 | 89.9 Detected    | 92.1 Detected     | 104.7 Detected   | 118.6 Detected    | Zfp618        | 1.319243604 | 1.16462736 | 1.28773073 | 1.1368078 |
| A_55_P2159 | 1875.6 Detected  | 3160.6 Detected   | 1162.7 Detected  | 2474.2 Detected   | Fam160a1      | 1.319151205 | 0.6199083  | 0.78282605 | 0.3678732 |
| A_55_P2034 | 166.7 Detected   | 190.7 Detected    | 235.1 Detected   | 219.9 Detected    | Hrh1          | 1.319136173 | 1.41031794 | 1.15312008 | 1.2328264 |
| A_55_P1965 | 50830.4 Detected | 63142.4 Detected  | 56762 Detected   | 67037.5 Detected  | Bud31         | 1.318846596 | 1.11669395 | 1.06168755 | 0.8989522 |
| A_55_P1999 | 6.9 Not Detect   | 10.1 Not Detect   | 20.1 Detected    | 9.1 Not Detect    | Pi16          | 1.31884058  | 2.91304348 | 0.9009901  | 1.990099  |
| A_55_P2106 | 3769.3 Detected  | 4192.2 Detected   | 3782.8 Detected  | 4970.2 Detected   | Mbnl2         | 1.318600271 | 1.00358157 | 1.18558275 | 0.9023424 |
| A_51_P2445 | 2317.8 Detected  | 2137 Detected     | 2161.9 Detected  | 3056.2 Detected   | Rab3gap2      | 1.318577962 | 0.93273794 | 1.4301357  | 1.0116518 |
| A_51_P3772 | 628 Detected     | 669.6 Detected    | 558.8 Detected   | 828 Detected      | Caap1         | 1.318471338 | 0.88980892 | 1.23655914 | 0.8345281 |
| A_66_P1376 | 58.1 Detected    | 72.4 Detected     | 54 Detected      | 76.6 Detected     | Fam166b       | 1.318416523 | 0.92943201 | 1.05801105 | 0.7458564 |
| A_55_P2012 | 42.4 Detected    | 39.8 Detected     | 44.5 Detected    | 55.9 Detected     | Ooep          | 1.318396226 | 1.0495283  | 1.40452261 | 1.1180905 |
| A_55_P2108 | 69.1 Detected    | 74.8 Detected     | 69.1 Detected    | 91.1 Detected     | Kcnp3         | 1.318379161 | 1          | 1.21791444 | 0.9237968 |
| A_55_P2124 | 304.4 Detected   | 384.3 Detected    | 348.2 Detected   | 401.3 Detected    | Cep41         | 1.318331143 | 1.14388962 | 1.04423627 | 0.906063  |
| A_55_P2119 | 71 Detected      | 51.1 Detected     | 92.8 Detected    | 93.6 Detected     | Gnal          | 1.318309859 | 1.30704225 | 1.83170254 | 1.816047  |
| A_51_P2929 | 7658.8 Detected  | 8415 Detected     | 6534.1 Detected  | 10096.3 Detected  | Eil           | 1.318261346 | 0.85314932 | 1.19979798 | 0.7764825 |
| A_51_P4668 | 11197.9 Detected | 11328.4 Detected  | 11044.9 Detected | 14761.2 Detected  | Sbds          | 1.31821145  | 0.98633672 | 1.30302602 | 0.9749744 |
| A_51_P4714 | 17.6 Detected    | 10.4 Not Detect   | 10.3 Not Detect  | 23.2 Not Detect   | Sult5a1       | 1.318181818 | 0.58522727 | 2.23076923 | 0.9903846 |
| A_55_P2118 | 44 Detected      | 44.1 Detected     | 39 Detected      | 58 Detected       | Gm10046       | 1.318181818 | 0.88636364 | 1.31519274 | 0.8843537 |
| A_55_P1957 | 1493.5 Detected  | 1506 Detected     | 3001.8 Detected  | 1968.7 Detected   | Ensa          | 1.318178775 | 2.00990961 | 1.30723772 | 1.9932271 |
| A_52_P1270 | 969.2 Detected   | 1086.2 Detected   | 706.4 Detected   | 1277.5 Detected   | Tnks          | 1.3180974   | 0.72884853 | 1.17611858 | 0.6503406 |
| A_55_P1952 | 2097.3 Detected  | 1839.3 Detected   | 2000.6 Detected  | 2764.4 Detected   | Odf2          | 1.318075621 | 0.9538931  | 1.50296308 | 1.0876964 |
| A_55_P2060 | 82910.1 Detected | 110280.8 Detected | 85272.7 Detected | 109277.3 Detected | Ddx39         | 1.318021568 | 1.02849593 | 0.9909005  | 0.7732325 |
| A_55_P1992 | 262.4 Detected   | 252.5 Detected    | 336.3 Detected   | 345.8 Detected    | 5830418K08Rik | 1.317835366 | 1.2816311  | 1.36950495 | 1.3318812 |

|            |          |          |          |          |          |            |          |            |               |             |            |            |           |
|------------|----------|----------|----------|----------|----------|------------|----------|------------|---------------|-------------|------------|------------|-----------|
| A_51_P3644 | 3194.8   | Detected | 3162.8   | Detected | 3077     | Detected   | 4209.8   | Detected   | Vamp7         | 1.317703769 | 0.96312758 | 1.33103579 | 0.9728721 |
| A_51_P2614 | 5773.7   | Detected | 6588.1   | Detected | 5352.3   | Detected   | 7607.8   | Detected   | Mlx           | 1.317664583 | 0.92701387 | 1.15477907 | 0.8124194 |
| A_55_P2116 | 25164.4  | Detected | 26602    | Detected | 26717.1  | Detected   | 33152.9  | Detected   | Aim1          | 1.317452433 | 1.06170225 | 1.24625592 | 1.0043267 |
| A_51_P3813 | 109706.2 | Detected | 133910.1 | Detected | 115353.4 | Detected   | 144529.3 | Detected   | Ndufa13       | 1.31742144  | 1.05147567 | 1.07930096 | 0.8614242 |
| A_51_P1575 | 1369.6   | Detected | 2020     | Detected | 1226.7   | Detected   | 1804     | Detected   | E2f4          | 1.317172897 | 0.89566297 | 0.89306931 | 0.6072772 |
| A_55_P1982 | 61.2     | Detected | 61.3     | Detected | 58.4     | Detected   | 80.6     | Detected   | Grip1         | 1.316993464 | 0.95424837 | 1.31484502 | 0.9526917 |
| A_55_P1957 | 5110     | Detected | 8059.4   | Detected | 6561.4   | Detected   | 6729.1   | Detected   | Krr1          | 1.316849315 | 1.28403131 | 0.83493808 | 0.8141301 |
| A_51_P3955 | 14278.9  | Detected | 13892.2  | Detected | 21741    | Detected   | 18800.8  | Detected   | Vkorc1        | 1.316684058 | 1.52259628 | 1.35333496 | 1.5649789 |
| A_55_P2053 | 530.5    | Detected | 658.2    | Detected | 588.8    | Detected   | 698.5    | Detected   | Gng4          | 1.316682375 | 1.10989632 | 1.06122759 | 0.8945609 |
| A_66_P1191 | 16014.1  | Detected | 14738.3  | Detected | 15840.9  | Detected   | 21083.8  | Detected   | Dusp3         | 1.316577266 | 0.98918453 | 1.43054491 | 1.0748119 |
| A_66_P1120 | 531.7    | Detected | 509.5    | Detected | 378.7    | Detected   | 700      | Detected   | Olf1r1252     | 1.316531879 | 0.71224375 | 1.37389598 | 0.7432777 |
| A_66_P1087 | 32740.6  | Detected | 33053.8  | Detected | 22656.7  | Detected   | 43103.2  | Detected   | Oxct1         | 1.316506112 | 0.69200626 | 1.30403161 | 0.6854492 |
| A_55_P2052 | 870.9    | Detected | 476.5    | Detected | 933.1    | Detected   | 1146.5   | Detected   | Akap13        | 1.316454243 | 1.07142037 | 2.40608604 | 1.9582371 |
| A_55_P2128 | 1209.1   | Detected | 1582.4   | Detected | 2081.3   | Detected   | 1591.7   | Detected   | Hsf2          | 1.316433711 | 1.721363   | 1.00587715 | 1.3152806 |
| A_55_P2065 | 3289.2   | Detected | 3092.4   | Detected | 2454.9   | Detected   | 4330     | Detected   | Hook3         | 1.316429527 | 0.7463517  | 1.40020696 | 0.7938494 |
| A_55_P2012 | 9333.2   | Detected | 10846.1  | Detected | 11466.3  | Detected   | 12286.1  | Detected   | Impa1         | 1.316386663 | 1.22854969 | 1.13276662 | 1.0571818 |
| A_55_P2094 | 55       | Detected | 69.1     | Detected | 48.6     | Detected   | 72.4     | Detected   | Gzma          | 1.316363636 | 0.88363636 | 1.04775687 | 0.7033285 |
| A_55_P2038 | 1825.9   | Detected | 2286.3   | Detected | 2056.4   | Detected   | 2403.5   | Detected   | 6-Mar         | 1.316337149 | 1.12623911 | 1.05126186 | 0.8994445 |
| A_52_P5178 | 8144.6   | Detected | 6638.6   | Detected | 9322     | Detected   | 10721    | Detected   | Man2c1        | 1.316332294 | 1.14456204 | 1.61494894 | 1.4042117 |
| A_52_P1896 | 1725.1   | Detected | 1656.4   | Detected | 1912.3   | Detected   | 2270.8   | Detected   | Armc8         | 1.316329488 | 1.10851545 | 1.3709249  | 1.1544917 |
| A_55_P2454 | 3026.8   | Detected | 3294.2   | Detected | 3286.5   | Detected   | 3984.1   | Detected   | Amn1          | 1.316274613 | 1.08580019 | 1.20942869 | 0.9976626 |
| A_52_P5611 | 134.4    | Detected | 129.9    | Detected | 239.1    | Detected   | 176.9    | Detected   | Dennd5b       | 1.316220238 | 1.77901786 | 1.36181678 | 1.8406467 |
| A_55_P2055 | 2377.1   | Detected | 2321.4   | Detected | 2287.2   | Detected   | 3128.7   | Detected   | Gpn2          | 1.316183585 | 0.96218081 | 1.34776428 | 0.9852675 |
| A_55_P1965 | 80250.3  | Detected | 90556.6  | Detected | 95206.6  | Detected   | 105621.5 | Detected   | Uqcrh         | 1.316150843 | 1.18637064 | 1.16635894 | 1.0513491 |
| A_55_P1967 | 1637.4   | Detected | 2922.9   | Detected | 1967.2   | Detected   | 2154.5   | Detected   | Pemt          | 1.315805545 | 1.20141688 | 0.7371104  | 0.6730302 |
| A_52_P5508 | 6261     | Detected | 7769.8   | Detected | 7305.8   | Detected   | 8237.8   | Detected   | Desi2         | 1.315732311 | 1.1668743  | 1.06023321 | 0.9402816 |
| A_51_P3293 | 25723.5  | Detected | 31897.2  | Detected | 34017    | Detected   | 33835.8  | Detected   | Snrnp25       | 1.315365327 | 1.32240947 | 1.06077649 | 1.0664572 |
| A_51_P3959 | 14112.1  | Detected | 22746.3  | Detected | 18733.3  | Detected   | 18562.5  | Detected   | Uchl4         | 1.315360577 | 1.32746367 | 0.81606679 | 0.8235757 |
| A_55_P2127 | 133.5    | Detected | 139.9    | Detected | 150.3    | Detected   | 175.6    | Detected   | Ccl19         | 1.315355805 | 1.1258427  | 1.25518227 | 1.0743388 |
| A_55_P2101 | 26015.1  | Detected | 31254.7  | Detected | 27487.9  | Detected   | 34219    | Detected   | Ncaph2        | 1.315351469 | 1.05661327 | 1.09484334 | 0.8794805 |
| A_55_P2149 | 169.4    | Detected | 205.2    | Detected | 212.9    | Detected   | 222.8    | Detected   | 2810410L24Rik | 1.315230224 | 1.25678867 | 1.08576998 | 1.0375244 |
| A_55_P1990 | 30404.1  | Detected | 34329.3  | Detected | 27592.1  | Detected   | 39987.8  | Detected   | Fnta          | 1.315210777 | 0.90751247 | 1.16483004 | 0.8037478 |
| A_51_P1207 | 292.2    | Detected | 245.5    | Detected | 263.2    | Detected   | 384.3    | Detected   | Magea7-ps     | 1.315195072 | 0.90075291 | 1.56537678 | 1.0720978 |
| A_55_P2016 | 947.7    | Detected | 1036.7   | Detected | 996      | Detected   | 1246.4   | Detected   | Kif3c         | 1.31518413  | 1.0509655  | 1.20227645 | 0.9607408 |
| A_55_P2070 | 77.1     | Detected | 80.9     | Detected | 16.6     | Not Detect | 101.4    | Detected   | Itpkb         | 1.315175097 | 0.2153048  | 1.25339926 | 0.2051916 |
| A_55_P1985 | 21584    | Detected | 7647.2   | Detected | 30846.3  | Detected   | 28386.5  | Detected   | Abcc3         | 1.31516401  | 1.42912806 | 3.71201224 | 4.0336725 |
| A_55_P2030 | 16.5     | Detected | 26.5     | Detected | 23.7     | Detected   | 21.7     | Not Detect | Gm5796        | 1.315151515 | 1.43636364 | 0.81886792 | 0.8943396 |
| A_55_P2168 | 40.3     | Detected | 66.5     | Detected | 36.6     | Detected   | 53       | Detected   | Banf2         | 1.315136476 | 0.90818859 | 0.79699248 | 0.5503759 |
| A_51_P3698 | 1663.1   | Detected | 2046.2   | Detected | 2420     | Detected   | 2187.2   | Detected   | Zfp410        | 1.315134388 | 1.45511394 | 1.06890822 | 1.1826801 |
| A_55_P2183 | 89.5     | Detected | 86.3     | Detected | 78.4     | Detected   | 117.7    | Detected   | Tmem201       | 1.315083799 | 0.87597765 | 1.36384705 | 0.9084589 |

|            |          |            |          |          |          |            |          |            |               |             |            |            |           |
|------------|----------|------------|----------|----------|----------|------------|----------|------------|---------------|-------------|------------|------------|-----------|
| A_51_P5160 | 126      | Detected   | 119.8    | Detected | 125.8    | Detected   | 165.7    | Detected   | Dntt          | 1.315079365 | 0.9984127  | 1.38313856 | 1.0500835 |
| A_51_P3208 | 5321.1   | Detected   | 6173.3   | Detected | 7254.2   | Detected   | 6996.8   | Detected   | Cln5          | 1.314916089 | 1.36328955 | 1.13339705 | 1.1750927 |
| A_55_P2117 | 12490.6  | Detected   | 15063.5  | Detected | 14901.7  | Detected   | 16422.1  | Detected   | Snrnp25       | 1.314756697 | 1.19303316 | 1.09019152 | 0.9892588 |
| A_55_P2020 | 157.9    | Detected   | 130.8    | Detected | 120.7    | Detected   | 207.6    | Detected   | 2-Mar         | 1.314756175 | 0.76440785 | 1.58715596 | 0.9227829 |
| A_52_P3093 | 285.4    | Detected   | 505.5    | Detected | 437      | Detected   | 375.2    | Detected   | Metap2        | 1.314646111 | 1.5311843  | 0.74223541 | 0.8644906 |
| A_51_P2632 | 989.3    | Detected   | 872      | Detected | 1224.3   | Detected   | 1300.5   | Detected   | Taf5          | 1.314565855 | 1.2375417  | 1.49139908 | 1.4040138 |
| A_66_P1409 | 6955.8   | Detected   | 11929.2  | Detected | 10114.4  | Detected   | 9143.4   | Detected   | Rpl15         | 1.314500129 | 1.45409586 | 0.76647219 | 0.8478691 |
| A_51_P1767 | 5760.1   | Detected   | 4946.9   | Detected | 9052.1   | Detected   | 7571.6   | Detected   | Atxn7l3b      | 1.314491068 | 1.57151786 | 1.5305747  | 1.829853  |
| A_55_P1965 | 473.5    | Detected   | 510.6    | Detected | 439.2    | Detected   | 622.4    | Detected   | Syt6          | 1.314466737 | 0.92756072 | 1.21895809 | 0.8601645 |
| A_51_P1804 | 14785.3  | Detected   | 15047.7  | Detected | 16228.3  | Detected   | 19434.5  | Detected   | Crk           | 1.314447458 | 1.09759694 | 1.29152628 | 1.0784572 |
| A_55_P2097 | 7901.3   | Detected   | 7160.8   | Detected | 8327.8   | Detected   | 10385.6  | Detected   | Nudt4         | 1.314416615 | 1.05397846 | 1.45034074 | 1.1629706 |
| A_66_P1280 | 341239.8 | Detected   | 351213.2 | Detected | 399542.7 | Detected   | 448490.9 | Detected   | Krt8          | 1.314298332 | 1.1708561  | 1.27697621 | 1.1376073 |
| A_55_P2297 | 6622.8   | Detected   | 5768.4   | Detected | 5232.5   | Detected   | 8704     | Detected   | Ago2          | 1.31424775  | 0.79007368 | 1.50891062 | 0.9070973 |
| A_55_P1966 | 21128.3  | Detected   | 29059.3  | Detected | 22197.2  | Detected   | 27767.3  | Detected   | Ctu2          | 1.314223104 | 1.05059091 | 0.95553919 | 0.7638587 |
| A_55_P2097 | 102.5    | Detected   | 104.5    | Detected | 75.4     | Detected   | 134.7    | Detected   | Uap1          | 1.314146341 | 0.73560976 | 1.28899522 | 0.7215311 |
| A_55_P2104 | 568.9    | Detected   | 543.8    | Detected | 461.2    | Detected   | 747.6    | Detected   | Utf1          | 1.314114959 | 0.81068729 | 1.37477014 | 0.8481059 |
| A_55_P2006 | 3910.4   | Detected   | 3145.7   | Detected | 3933.2   | Detected   | 5138.2   | Detected   | Myo5a         | 1.313983224 | 1.00583061 | 1.63340433 | 1.2503417 |
| A_66_P1213 | 158683.3 | Detected   | 158425.3 | Detected | 177317.8 | Detected   | 208499.1 | Detected   | Gars          | 1.313932216 | 1.11743202 | 1.31607199 | 1.1192518 |
| A_51_P1350 | 6033     | Detected   | 6309.4   | Detected | 8069.5   | Detected   | 7926.9   | Detected   | Zfp212        | 1.313923421 | 1.33756009 | 1.25636352 | 1.2789647 |
| A_66_P1056 | 53.2     | Detected   | 44.2     | Detected | 30.7     | Detected   | 69.9     | Detected   | Trim34a       | 1.313909774 | 0.57706767 | 1.58144796 | 0.6945701 |
| A_51_P3522 | 649.3    | Detected   | 644.4    | Detected | 842      | Detected   | 853.1    | Detected   | Cyb561d1      | 1.313876482 | 1.29678115 | 1.32386716 | 1.3066418 |
| A_55_P2078 | 23.9     | Detected   | 22.6     | Detected | 15       | Not Detect | 31.4     | Not Detect | 1700020114Rik | 1.313807531 | 0.62761506 | 1.38938053 | 0.6637168 |
| A_55_P2008 | 63.1     | Detected   | 64.5     | Detected | 63.9     | Detected   | 82.9     | Detected   | Nnt           | 1.313787639 | 1.01267829 | 1.28527132 | 0.9906977 |
| A_65_P1818 | 415.1    | Detected   | 441.6    | Detected | 505      | Detected   | 545.3    | Detected   | Runx2         | 1.313659359 | 1.21657432 | 1.2348279  | 1.1435688 |
| A_55_P2015 | 5181.9   | Detected   | 6441.4   | Detected | 7022.4   | Detected   | 6807.2   | Detected   | Atg5          | 1.313649434 | 1.3551786  | 1.0567889  | 1.0901978 |
| A_55_P2252 | 44       | Detected   | 49.2     | Detected | 35       | Detected   | 57.8     | Detected   | 3426406K10Rik | 1.313636364 | 0.79545455 | 1.17479675 | 0.7113821 |
| A_52_P6804 | 16640.1  | Detected   | 18872.3  | Detected | 21708.7  | Detected   | 21858.4  | Detected   | Pdcd10        | 1.313597875 | 1.30460153 | 1.15822661 | 1.1502943 |
| A_52_P2729 | 617.5    | Detected   | 595.5    | Detected | 563.7    | Detected   | 811.1    | Detected   | Ccnh          | 1.313522267 | 0.91287449 | 1.3620487  | 0.9465995 |
| A_66_P1301 | 633.3    | Detected   | 816.6    | Detected | 740      | Detected   | 831.8    | Detected   | Ube2t         | 1.313437549 | 1.16848255 | 1.01861376 | 0.9061964 |
| A_51_P3608 | 1343.6   | Detected   | 1400.9   | Detected | 1786.3   | Detected   | 1764.7   | Detected   | Zfp266        | 1.31341173  | 1.32948794 | 1.2596902  | 1.2751089 |
| A_51_P1799 | 582      | Detected   | 593.5    | Detected | 555.7    | Detected   | 764.4    | Detected   | Igdcc3        | 1.313402062 | 0.954811   | 1.28795282 | 0.93631   |
| A_55_P2185 | 657.8    | Detected   | 745.4    | Detected | 653.1    | Detected   | 863.9    | Detected   | Mettl7a3      | 1.313317118 | 0.99285497 | 1.15897505 | 0.8761739 |
| A_55_P2004 | 334      | Detected   | 395.9    | Detected | 325.9    | Detected   | 438.6    | Detected   | Ass1          | 1.313173653 | 0.9757485  | 1.10785552 | 0.8231877 |
| A_55_P2154 | 1817     | Detected   | 1762.7   | Detected | 1772.9   | Detected   | 2385.6   | Detected   | Ccdc28a       | 1.312933407 | 0.97572922 | 1.35337834 | 1.0057866 |
| A_55_P2117 | 32.6     | Detected   | 41.5     | Detected | 17.5     | Not Detect | 42.8     | Not Detect | Cacng7        | 1.312883436 | 0.53680982 | 1.0313253  | 0.4216867 |
| A_51_P3747 | 13122.2  | Detected   | 12037.7  | Detected | 13989.3  | Detected   | 17226.8  | Detected   | Epn3          | 1.312798159 | 1.06607886 | 1.43107072 | 1.162124  |
| A_55_P2136 | 51.8     | Detected   | 62.4     | Detected | 47.1     | Detected   | 68       | Detected   | Cnn3          | 1.312741313 | 0.90926641 | 1.08974359 | 0.7548077 |
| A_52_P5977 | 34457    | Detected   | 40948.8  | Detected | 40060.3  | Detected   | 45228.8  | Detected   | Gprc5a        | 1.312615724 | 1.16261718 | 1.10452077 | 0.9783022 |
| A_55_P2110 | 9.6      | Not Detect | 34.9     | Detected | 38.5     | Detected   | 12.6     | Not Detect | C1qtnf6       | 1.3125      | 4.01041667 | 0.36103152 | 1.1031519 |
| A_55_P2234 | 1154.1   | Detected   | 865.8    | Detected | 890.3    | Detected   | 1514.7   | Detected   | Spice1        | 1.312451261 | 0.77142362 | 1.74948025 | 1.0282975 |

|            |         |            |          |          |          |            |          |            |               |             |            |            |           |
|------------|---------|------------|----------|----------|----------|------------|----------|------------|---------------|-------------|------------|------------|-----------|
| A_55_P2418 | 69.8    | Detected   | 89.6     | Detected | 115.1    | Detected   | 91.6     | Detected   | 4732416N19Rik | 1.312320917 | 1.64899713 | 1.02232143 | 1.2845982 |
| A_51_P4908 | 6914.2  | Detected   | 7323.2   | Detected | 9123.6   | Detected   | 9073.5   | Detected   | Me2           | 1.312299326 | 1.31954528 | 1.23900754 | 1.2458488 |
| A_66_P1289 | 978.1   | Detected   | 828.2    | Detected | 759.7    | Detected   | 1283.5   | Detected   | Pml           | 1.312238012 | 0.77670995 | 1.54974644 | 0.9172905 |
| A_55_P2055 | 520.2   | Detected   | 513.2    | Detected | 454.9    | Detected   | 682.6    | Detected   | Gm5878        | 1.31218762  | 0.87447136 | 1.33008574 | 0.8863991 |
| A_66_P1325 | 74924.1 | Detected   | 69814.8  | Detected | 82989.4  | Detected   | 98311.4  | Detected   | Scamp3        | 1.312146559 | 1.10764627 | 1.4081742  | 1.1887078 |
| A_51_P4703 | 909.8   | Detected   | 1042.8   | Detected | 1039.4   | Detected   | 1193.7   | Detected   | Cby1          | 1.312046604 | 1.14244889 | 1.14470656 | 0.9967395 |
| A_52_P1287 | 68147.8 | Detected   | 79057.8  | Detected | 71225.9  | Detected   | 89402.7  | Detected   | Hspa8         | 1.311894148 | 1.045168   | 1.13085236 | 0.9009345 |
| A_55_P1952 | 372.6   | Detected   | 513.3    | Detected | 381.5    | Detected   | 488.8    | Detected   | Fgd6          | 1.311862587 | 1.02388621 | 0.95226963 | 0.7432301 |
| A_55_P2128 | 31423.7 | Detected   | 37134.2  | Detected | 38956.3  | Detected   | 41222.6  | Detected   | Selk          | 1.311831516 | 1.23971079 | 1.11009797 | 1.049068  |
| A_55_P1992 | 9213.6  | Detected   | 8927.2   | Detected | 11565    | Detected   | 12086.6  | Detected   | LOC101055725  | 1.311821655 | 1.25520969 | 1.35390716 | 1.295479  |
| A_51_P1566 | 38088.4 | Detected   | 37358.3  | Detected | 42205.6  | Detected   | 49962.3  | Detected   | Glrx5         | 1.311745833 | 1.1080959  | 1.33738152 | 1.1297516 |
| A_55_P2054 | 6251.1  | Detected   | 7364.3   | Detected | 7715.1   | Detected   | 8199.6   | Detected   | Polr3c        | 1.31170514  | 1.23419878 | 1.11342558 | 1.0476352 |
| A_52_P3893 | 5469    | Detected   | 3649.2   | Detected | 6511.7   | Detected   | 7172.9   | Detected   | Snap29        | 1.311556043 | 1.19065643 | 1.9656089  | 1.7844185 |
| A_52_P1163 | 1194.1  | Detected   | 1174.5   | Detected | 1724.6   | Detected   | 1566.1   | Detected   | Ppp1r15b      | 1.311531698 | 1.44426765 | 1.33341848 | 1.4683695 |
| A_55_P2345 | 12.2    | Not Detect | 18.6     | Detected | 10.6     | Not Detect | 16       | Not Detect | 1700003P14Rik | 1.31147541  | 0.86885246 | 0.86021505 | 0.5698925 |
| A_52_P4441 | 8376.2  | Detected   | 5634.8   | Detected | 10244.6  | Detected   | 10984.7  | Detected   | Rab11a        | 1.311418065 | 1.22306058 | 1.9494392  | 1.8180947 |
| A_52_P1756 | 651     | Detected   | 565.7    | Detected | 684.7    | Detected   | 853.7    | Detected   | Gm13023       | 1.311367127 | 1.05176651 | 1.50910377 | 1.2103588 |
| A_55_P2062 | 597.7   | Detected   | 569.6    | Detected | 594.6    | Detected   | 783.8    | Detected   | 4932438A13Rik | 1.311360214 | 0.99481345 | 1.37605337 | 1.0438904 |
| A_55_P2407 | 121.1   | Detected   | 161.3    | Detected | 135      | Detected   | 158.8    | Detected   | Tomm20l       | 1.311312964 | 1.11478117 | 0.98450093 | 0.8369498 |
| A_51_P1287 | 580.1   | Detected   | 522.8    | Detected | 560.5    | Detected   | 760.6    | Detected   | Zfp84         | 1.311153249 | 0.96621272 | 1.45485845 | 1.0721117 |
| A_55_P2246 | 1075.1  | Detected   | 966.3    | Detected | 709.2    | Detected   | 1409.6   | Detected   | 9330159M07Rik | 1.311133848 | 0.65965957 | 1.45876022 | 0.7339336 |
| A_51_P4502 | 789.8   | Detected   | 920.8    | Detected | 723.1    | Detected   | 1035.5   | Detected   | Thap3         | 1.311091416 | 0.91554824 | 1.1245656  | 0.7852954 |
| A_55_P1969 | 19384.4 | Detected   | 11541.1  | Detected | 16868.1  | Detected   | 25413.2  | Detected   | Pitpnm1       | 1.31101298  | 0.87018943 | 2.20197382 | 1.4615678 |
| A_55_P2041 | 79044.2 | Detected   | 95561.1  | Detected | 110076.3 | Detected   | 103624.6 | Detected   | Atp5a1        | 1.310970318 | 1.39259174 | 1.08438057 | 1.1518944 |
| A_52_P3376 | 38432.7 | Detected   | 47572.3  | Detected | 39465.2  | Detected   | 50381.9  | Detected   | Canx          | 1.310912322 | 1.02686514 | 1.05905958 | 0.8295836 |
| A_55_P2053 | 92539.9 | Detected   | 87724.8  | Detected | 89583.1  | Detected   | 121308.6 | Detected   | Mrfap1        | 1.310878875 | 0.96804838 | 1.38283131 | 1.0211833 |
| A_51_P2054 | 8997.4  | Detected   | 9526.6   | Detected | 10699.8  | Detected   | 11793.9  | Detected   | Mtmr6         | 1.310812012 | 1.18921022 | 1.23799677 | 1.1231499 |
| A_52_P1932 | 5843    | Detected   | 5745.3   | Detected | 6399.7   | Detected   | 7659     | Detected   | Trnau1ap      | 1.310799247 | 1.0952764  | 1.33308966 | 1.1139018 |
| A_51_P3065 | 77621.1 | Detected   | 67514.2  | Detected | 93291.9  | Detected   | 101745.4 | Detected   | Ywhah         | 1.310795647 | 1.2018884  | 1.50702223 | 1.3818115 |
| A_55_P2132 | 248.1   | Detected   | 218.9    | Detected | 264.2    | Detected   | 325.2    | Detected   | Zfp367        | 1.31076179  | 1.06489319 | 1.48560987 | 1.2069438 |
| A_55_P2012 | 459.2   | Detected   | 710.5    | Detected | 620.3    | Detected   | 601.9    | Detected   | Bmp8a         | 1.31075784  | 1.35082753 | 0.84714989 | 0.8730471 |
| A_55_P2162 | 1952    | Detected   | 1273.5   | Detected | 1470.5   | Detected   | 2558.5   | Detected   | Ahnak         | 1.310706967 | 0.75332992 | 2.00903023 | 1.1546918 |
| A_55_P1982 | 135.5   | Detected   | 140.5    | Detected | 170      | Detected   | 177.6    | Detected   | Ctrb1         | 1.310701107 | 1.25461255 | 1.26405694 | 1.2099644 |
| A_55_P2295 | 411.8   | Detected   | 405.9    | Detected | 336.3    | Detected   | 539.7    | Detected   | 5830427D02Rik | 1.310587664 | 0.81665857 | 1.32963784 | 0.8285292 |
| A_51_P4893 | 3600.5  | Detected   | 3425.1   | Detected | 4094.3   | Detected   | 4718.5   | Detected   | Becn1         | 1.310512429 | 1.13714762 | 1.37762401 | 1.1953812 |
| A_55_P2025 | 84999.7 | Detected   | 101166.4 | Detected | 83268.3  | Detected   | 111381.5 | Detected   | Gins3         | 1.310375213 | 0.97963052 | 1.10097325 | 0.8230826 |
| A_52_P2416 | 90919.1 | Detected   | 96023.4  | Detected | 115004.5 | Detected   | 119136.6 | Detected   | Mrpl51        | 1.31035833  | 1.26491023 | 1.24070383 | 1.1976716 |
| A_55_P2330 | 20.3    | Detected   | 20.5     | Detected | 10.5     | Not Detect | 26.6     | Not Detect | 4930474G06Rik | 1.310344828 | 0.51724138 | 1.29756098 | 0.5121951 |
| A_55_P1954 | 46.4    | Detected   | 61.8     | Detected | 52.7     | Detected   | 60.8     | Detected   | Pars2         | 1.310344828 | 1.13577586 | 0.98381877 | 0.8527508 |
| A_55_P2138 | 16426   | Detected   | 16092.5  | Detected | 17396.7  | Detected   | 21520.4  | Detected   | U2af114       | 1.310142457 | 1.05909534 | 1.33729377 | 1.081044  |

|            |         |            |         |          |         |            |         |            |               |             |            |            |           |
|------------|---------|------------|---------|----------|---------|------------|---------|------------|---------------|-------------|------------|------------|-----------|
| A_52_P6778 | 596     | Detected   | 541.9   | Detected | 432.5   | Detected   | 780.7   | Detected   | Trmt44        | 1.309899329 | 0.72567114 | 1.44067171 | 0.7981177 |
| A_51_P3738 | 633     | Detected   | 712.1   | Detected | 591.3   | Detected   | 829.1   | Detected   | Guca1b        | 1.309794629 | 0.93412322 | 1.16430277 | 0.8303609 |
| A_55_P2093 | 12218.1 | Detected   | 16003.8 | Detected | 12251.3 | Detected   | 16001.7 | Detected   | Zmpste24      | 1.309671717 | 1.00271728 | 0.99986878 | 0.7655244 |
| A_55_P1985 | 124.7   | Detected   | 106.3   | Detected | 169     | Detected   | 163.3   | Detected   | Tmem241       | 1.309542903 | 1.35525261 | 1.53621825 | 1.5898401 |
| A_51_P4098 | 1720.7  | Detected   | 1294.2  | Detected | 2082    | Detected   | 2253.3  | Detected   | Prkar2a       | 1.309525193 | 1.20997269 | 1.74107557 | 1.6087158 |
| A_52_P4822 | 13620.8 | Detected   | 14521.4 | Detected | 19170.3 | Detected   | 17836.3 | Detected   | Tsen2         | 1.309489898 | 1.40742834 | 1.22827689 | 1.3201413 |
| A_52_P5932 | 23619   | Detected   | 42604.3 | Detected | 25278.7 | Detected   | 30926.7 | Detected   | Lsm6          | 1.309399212 | 1.0702697  | 0.7259056  | 0.5933368 |
| A_52_P4203 | 13735.7 | Detected   | 9727.4  | Detected | 13571.3 | Detected   | 17985.1 | Detected   | Apeh          | 1.309369017 | 0.98803119 | 1.84891132 | 1.3951621 |
| A_51_P1403 | 3726.1  | Detected   | 4739.9  | Detected | 7484.8  | Detected   | 4878.4  | Detected   | Nadsyn1       | 1.309250959 | 2.00874909 | 1.02922003 | 1.579105  |
| A_52_P1403 | 5069.1  | Detected   | 3950.3  | Detected | 5678.1  | Detected   | 6636.7  | Detected   | Calm3         | 1.309246217 | 1.12013967 | 1.68004962 | 1.4373845 |
| A_52_P6422 | 2975    | Detected   | 2409.4  | Detected | 3577.2  | Detected   | 3894.9  | Detected   | Mkrn1         | 1.309210084 | 1.20242017 | 1.61654354 | 1.484685  |
| A_55_P2268 | 259.8   | Detected   | 362.4   | Detected | 171.6   | Detected   | 340.1   | Detected   | Arhgap10      | 1.309083911 | 0.66050808 | 0.93846578 | 0.4735099 |
| A_65_P1432 | 217.1   | Detected   | 328.5   | Detected | 330.3   | Detected   | 284.2   | Detected   | Atl2          | 1.309074159 | 1.5214187  | 0.8651446  | 1.0054795 |
| A_55_P2305 | 404.8   | Detected   | 297.8   | Detected | 278.1   | Detected   | 529.9   | Detected   | C81189        | 1.309041502 | 0.68700593 | 1.77938214 | 0.9338482 |
| A_51_P2338 | 13802.6 | Detected   | 13013.5 | Detected | 17475.8 | Detected   | 18067.2 | Detected   | Tmem126a      | 1.308970774 | 1.26612377 | 1.38834287 | 1.3428978 |
| A_52_P2460 | 75.8    | Detected   | 95.3    | Detected | 125.6   | Detected   | 99.2    | Detected   | Lrrc40        | 1.308707124 | 1.65699208 | 1.0409234  | 1.3179433 |
| A_55_P1963 | 8.1     | Not Detect | 50.9    | Detected | 3.8     | Not Detect | 10.6    | Not Detect | Lcn5          | 1.308641975 | 0.4691358  | 0.20825147 | 0.0746562 |
| A_55_P2088 | 22218.6 | Detected   | 19249.9 | Detected | 27919   | Detected   | 29072.3 | Detected   | Plscr1        | 1.30846678  | 1.25655982 | 1.5102572  | 1.4503452 |
| A_55_P2092 | 639     | Detected   | 567.3   | Detected | 493.7   | Detected   | 836     | Detected   | Tmco3         | 1.30829421  | 0.77261346 | 1.4736471  | 0.8702626 |
| A_55_P2117 | 6194.9  | Detected   | 7348.8  | Detected | 7624.5  | Detected   | 8104.2  | Detected   | Rmnd1         | 1.308205136 | 1.23077047 | 1.10279229 | 1.0375163 |
| A_51_P4382 | 12210.5 | Detected   | 16859.2 | Detected | 17832   | Detected   | 15973.3 | Detected   | Sil1          | 1.308161009 | 1.46038246 | 0.94745302 | 1.0577014 |
| A_55_P2028 | 72147.4 | Detected   | 70457   | Detected | 90411.6 | Detected   | 94378.5 | Detected   | Hnrnpf        | 1.308134458 | 1.25315119 | 1.33951914 | 1.2832167 |
| A_55_P2151 | 13855.5 | Detected   | 20907.8 | Detected | 12017.1 | Detected   | 18124.6 | Detected   | Farsa         | 1.308115911 | 0.86731623 | 0.86688222 | 0.5747664 |
| A_55_P2160 | 819.6   | Detected   | 1097.8  | Detected | 966.9   | Detected   | 1072.1  | Detected   | Tfcp2         | 1.308077111 | 1.17972182 | 0.97658954 | 0.8807615 |
| A_52_P6258 | 861     | Detected   | 1068.3  | Detected | 1164.6  | Detected   | 1126.2  | Detected   | Tmem209       | 1.308013937 | 1.35261324 | 1.05419826 | 1.0901432 |
| A_52_P3517 | 369.8   | Detected   | 469.4   | Detected | 472     | Detected   | 483.7   | Detected   | Tfam          | 1.308004327 | 1.2763656  | 1.03046442 | 1.005539  |
| A_52_P2955 | 9085.9  | Detected   | 6507.5  | Detected | 9918.6  | Detected   | 11883.3 | Detected   | Slc25a28      | 1.307883644 | 1.0916475  | 1.82609297 | 1.5241798 |
| A_55_P2322 | 219.9   | Detected   | 147.4   | Detected | 167.7   | Detected   | 287.6   | Detected   | 4633401B06Rik | 1.307867212 | 0.76261937 | 1.95115332 | 1.1377205 |
| A_55_P2061 | 35133.1 | Detected   | 44415.6 | Detected | 48170.5 | Detected   | 45948.3 | Detected   | Atp5d         | 1.307835062 | 1.37108596 | 1.03450815 | 1.0845401 |
| A_51_P5198 | 9909.1  | Detected   | 13796.8 | Detected | 8004.3  | Detected   | 12958.2 | Detected   | Cherp         | 1.307707057 | 0.80777265 | 0.93921779 | 0.5801563 |
| A_55_P1956 | 15574.3 | Detected   | 15819.9 | Detected | 13159.5 | Detected   | 20365.6 | Detected   | Atp5g1        | 1.307641435 | 0.84494969 | 1.28734063 | 0.8318321 |
| A_51_P4004 | 432     | Detected   | 504.5   | Detected | 510.1   | Detected   | 564.9   | Detected   | Agmat         | 1.307638889 | 1.18078704 | 1.1197225  | 1.0111001 |
| A_52_P5274 | 28820.7 | Detected   | 25739.6 | Detected | 37354.1 | Detected   | 37686.8 | Detected   | D15Erttd621e  | 1.307629586 | 1.2960858  | 1.4641564  | 1.4512308 |
| A_55_P2116 | 13645.3 | Detected   | 11687.5 | Detected | 12365.7 | Detected   | 17841   | Detected   | Ap2a1         | 1.307483163 | 0.90622412 | 1.52650267 | 1.0580278 |
| A_66_P1274 | 4000.5  | Detected   | 2835    | Detected | 4604.3  | Detected   | 5229.9  | Detected   | Zfp652        | 1.307311586 | 1.15093113 | 1.8447619  | 1.6240917 |
| A_55_P2137 | 14      | Detected   | 109.6   | Detected | 8.8     | Not Detect | 18.3    | Not Detect | Srgap3        | 1.307142857 | 0.62857143 | 0.1669708  | 0.080292  |
| A_55_P2112 | 3022.7  | Detected   | 3312.1  | Detected | 2183.7  | Detected   | 3950.8  | Detected   | Crtc1         | 1.307043372 | 0.72243359 | 1.19283838 | 0.6593098 |
| A_55_P2025 | 38.8    | Detected   | 40.2    | Detected | 39.9    | Detected   | 50.7    | Not Detect | Fanci         | 1.306701031 | 1.02835052 | 1.26119403 | 0.9925373 |
| A_55_P2046 | 4051    | Detected   | 4571.5  | Detected | 4394.2  | Detected   | 5293.1  | Detected   | Tvp23b        | 1.30661565  | 1.08471982 | 1.15784753 | 0.9612162 |
| A_55_P2091 | 4056.2  | Detected   | 3507.9  | Detected | 3867.7  | Detected   | 5299.4  | Detected   | Fnip1         | 1.306493763 | 0.95352793 | 1.51070441 | 1.1025685 |

|            |                  |                  |                  |                  |               |             |            |            |           |
|------------|------------------|------------------|------------------|------------------|---------------|-------------|------------|------------|-----------|
| A_66_P1143 | 38.5 Detected    | 38.1 Detected    | 125.8 Detected   | 50.3 Detected    | Ypel2         | 1.306493506 | 3.26753247 | 1.32020997 | 3.3018373 |
| A_55_P1976 | 9500.1 Detected  | 7541.6 Detected  | 11107.1 Detected | 12411.5 Detected | C130074G19Rik | 1.306459932 | 1.16915611 | 1.6457383  | 1.4727777 |
| A_55_P2047 | 24533.8 Detected | 31596.5 Detected | 22065.9 Detected | 32052.1 Detected | Mbtps1        | 1.306446617 | 0.89940816 | 1.01441932 | 0.6983653 |
| A_55_P2101 | 135.1 Detected   | 138.4 Detected   | 122 Detected     | 176.5 Detected   | L1td1         | 1.306439674 | 0.90303479 | 1.27528902 | 0.8815029 |
| A_55_P1954 | 2723.9 Detected  | 3334.5 Detected  | 2145.3 Detected  | 3558.6 Detected  | Zfp672        | 1.306435625 | 0.78758398 | 1.06720648 | 0.6433648 |
| A_51_P1627 | 594.5 Detected   | 591 Detected     | 752.4 Detected   | 776.5 Detected   | Zfp623        | 1.306139613 | 1.26560135 | 1.31387479 | 1.2730964 |
| A_55_P1998 | 1001.9 Detected  | 819.7 Detected   | 693.5 Detected   | 1308.6 Detected  | Trim16        | 1.306118375 | 0.69218485 | 1.59643772 | 0.8460412 |
| A_51_P3480 | 10531.5 Detected | 14062.1 Detected | 11455.3 Detected | 13755.3 Detected | Nudt21        | 1.306110241 | 1.0877178  | 0.97818249 | 0.8146223 |
| A_55_P2185 | 66 Detected      | 62.8 Detected    | 53.5 Detected    | 86.2 Detected    | Kmt2a         | 1.306060606 | 0.81060606 | 1.37261146 | 0.8519108 |
| A_55_P1963 | 2731.9 Detected  | 3530.9 Detected  | 2785.8 Detected  | 3567.9 Detected  | Ampd2         | 1.306014129 | 1.01972986 | 1.01047891 | 0.7889773 |
| A_51_P3626 | 396 Detected     | 466.5 Detected   | 317.7 Detected   | 517.1 Detected   | Spin4         | 1.305808081 | 0.80227273 | 1.10846731 | 0.6810289 |
| A_55_P2165 | 324.4 Detected   | 568.2 Detected   | 305.3 Detected   | 423.6 Detected   | Fut10         | 1.305795314 | 0.94112207 | 0.74551214 | 0.5373108 |
| A_55_P1971 | 2937.7 Detected  | 2109.1 Detected  | 3781.2 Detected  | 3835.8 Detected  | Zfp688        | 1.305715356 | 1.28712939 | 1.81869044 | 1.7928026 |
| A_55_P1965 | 126 Detected     | 109.3 Detected   | 104.5 Detected   | 164.5 Detected   | Fbxl2         | 1.305555556 | 0.82936508 | 1.50503202 | 0.9560842 |
| A_55_P1987 | 129.6 Detected   | 271.3 Detected   | 120.5 Detected   | 169.2 Detected   | Nav3          | 1.305555556 | 0.92978395 | 0.62366384 | 0.4441578 |
| A_51_P4061 | 7.2 Not Detect   | 26.2 Detected    | 11.3 Not Detect  | 9.4 Not Detect   | Asb10         | 1.305555556 | 1.56944444 | 0.35877863 | 0.4312977 |
| A_55_P1991 | 10.8 Not Detect  | 6.9 Not Detect   | 46.8 Detected    | 14.1 Not Detect  | Icos          | 1.305555556 | 4.33333333 | 2.04347826 | 6.7826087 |
| A_55_P1979 | 39373.9 Detected | 50870.8 Detected | 54766.9 Detected | 51403.6 Detected | Uqcr11        | 1.305524726 | 1.39094425 | 1.01047359 | 1.0765881 |
| A_55_P1957 | 1114.5 Detected  | 935.5 Detected   | 1159.4 Detected  | 1454.9 Detected  | Tom1          | 1.305428443 | 1.04028712 | 1.55521112 | 1.2393373 |
| A_55_P2009 | 120.5 Detected   | 97.1 Detected    | 103.5 Detected   | 157.3 Detected   | Gtpbp3        | 1.305394191 | 0.85892116 | 1.6199794  | 1.0659114 |
| A_55_P1992 | 16.7 Detected    | 35.3 Detected    | 6.4 Not Detect   | 21.8 Not Detect  | Gpc4          | 1.305389222 | 0.38323353 | 0.61756374 | 0.1813031 |
| A_55_P2150 | 26.2 Detected    | 30.5 Detected    | 48.6 Detected    | 34.2 Not Detect  | Foxo4         | 1.305343511 | 1.85496183 | 1.12131148 | 1.5934426 |
| A_51_P2029 | 6457.2 Detected  | 8757.4 Detected  | 5432.5 Detected  | 8428.6 Detected  | Csnk2a2       | 1.305302608 | 0.84130893 | 0.96245461 | 0.6203325 |
| A_55_P2052 | 9024.4 Detected  | 8196.9 Detected  | 9599.3 Detected  | 11779.1 Detected | O610009B22Rik | 1.305250211 | 1.06370507 | 1.43701887 | 1.1710891 |
| A_55_P2391 | 39 Detected      | 45.9 Detected    | 36.3 Detected    | 50.9 Detected    | C230014O12Rik | 1.305128205 | 0.93076923 | 1.10893246 | 0.7908497 |
| A_52_P1045 | 55.4 Detected    | 144.5 Detected   | 67.6 Detected    | 72.3 Detected    | Gm11237       | 1.305054152 | 1.22021661 | 0.50034602 | 0.4678201 |
| A_55_P2033 | 33986.3 Detected | 46193.7 Detected | 43713.3 Detected | 44353.3 Detected | Gm6981        | 1.305034676 | 1.28620356 | 0.96015907 | 0.9463044 |
| A_55_P2043 | 141 Detected     | 69.9 Detected    | 114.3 Detected   | 184 Detected     | A930007A09Rik | 1.304964539 | 0.8106383  | 2.6323319  | 1.6351931 |
| A_55_P1991 | 10967.7 Detected | 9498.9 Detected  | 12866 Detected   | 14312.3 Detected | Slc25a46      | 1.30494999  | 1.17308096 | 1.50673236 | 1.3544726 |
| A_55_P2128 | 5240.9 Detected  | 5661 Detected    | 5086.4 Detected  | 6839.1 Detected  | Ubp2l         | 1.304947623 | 0.97052033 | 1.20810811 | 0.8984985 |
| A_51_P1359 | 834.7 Detected   | 1219 Detected    | 833.9 Detected   | 1089 Detected    | Rnf219        | 1.304660357 | 0.99904157 | 0.89335521 | 0.6840853 |
| A_55_P2235 | 27.9 Detected    | 25.7 Detected    | 26.8 Detected    | 36.4 Not Detect  | 1700069L16Rik | 1.304659498 | 0.96057348 | 1.41634241 | 1.0428016 |
| A_55_P2043 | 54.5 Detected    | 72.6 Detected    | 51.4 Detected    | 71.1 Detected    | Gm10071       | 1.304587156 | 0.94311927 | 0.97933884 | 0.707989  |
| A_55_P2136 | 787.3 Detected   | 784.2 Detected   | 950.7 Detected   | 1027.1 Detected  | Slc36a4       | 1.304585292 | 1.20754477 | 1.30974241 | 1.2123183 |
| A_55_P1967 | 24.3 Detected    | 21.2 Detected    | 26.4 Detected    | 31.7 Not Detect  | Ankef1        | 1.304526749 | 1.08641975 | 1.49528302 | 1.245283  |
| A_55_P2091 | 5071.2 Detected  | 3501.4 Detected  | 5067.3 Detected  | 6615.5 Detected  | Tango2        | 1.304523584 | 0.99923095 | 1.8893871  | 1.4472211 |
| A_55_P2177 | 218.1 Detected   | 194.9 Detected   | 128.9 Detected   | 284.5 Detected   | Evc2          | 1.304447501 | 0.5910133  | 1.45972293 | 0.6613648 |
| A_55_P2140 | 180 Detected     | 191.2 Detected   | 187.6 Detected   | 234.8 Detected   | Krt31         | 1.304444444 | 1.04222222 | 1.22803347 | 0.9811715 |
| A_52_P4284 | 6886 Detected    | 6350.8 Detected  | 8053.3 Detected  | 8982.2 Detected  | Rhoa          | 1.304414755 | 1.16951786 | 1.4143415  | 1.2680765 |
| A_52_P7079 | 6.9 Not Detect   | 7.6 Not Detect   | 19.6 Detected    | 9 Not Detect     | Cxcr5         | 1.304347826 | 2.84057971 | 1.18421053 | 2.5789474 |

|            |                   |                   |                   |                   |               |             |            |            |           |
|------------|-------------------|-------------------|-------------------|-------------------|---------------|-------------|------------|------------|-----------|
| A_51_P1673 | 6.9 Not Detect    | 37.1 Detected     | 6.4 Not Detect    | 9 Not Detect      | Ptpn7         | 1.304347826 | 0.92753623 | 0.2425876  | 0.1725067 |
| A_55_P1992 | 29623.1 Detected  | 35325 Detected    | 37265.1 Detected  | 38638.6 Detected  | Tars2         | 1.304340194 | 1.25797435 | 1.09380326 | 1.0549214 |
| A_55_P1966 | 58661.1 Detected  | 63340.2 Detected  | 49954.3 Detected  | 76506.4 Detected  | Gsr           | 1.304210115 | 0.85157455 | 1.20786483 | 0.7886666 |
| A_65_P0886 | 65.1 Detected     | 108.7 Detected    | 44.2 Detected     | 84.9 Detected     | Dph5          | 1.304147465 | 0.67895545 | 0.78104876 | 0.4066237 |
| A_55_P1973 | 71150.8 Detected  | 61711.6 Detected  | 98722.2 Detected  | 92788.6 Detected  | Atp6v1f       | 1.30411183  | 1.38750654 | 1.50358442 | 1.5997349 |
| A_55_P2091 | 124412 Detected   | 169778.3 Detected | 162352.4 Detected | 162246 Detected   | 3000002C10Rik | 1.304102498 | 1.30495772 | 0.9556345  | 0.9562612 |
| A_51_P2044 | 24530.8 Detected  | 34891.3 Detected  | 25871 Detected    | 31990.6 Detected  | Shcbp1        | 1.304099336 | 1.05463336 | 0.91686466 | 0.7414742 |
| A_66_P1005 | 31828.2 Detected  | 34298.2 Detected  | 48329 Detected    | 41506.6 Detected  | Ccdc107       | 1.304082543 | 1.51843334 | 1.21016846 | 1.4090827 |
| A_51_P3313 | 147 Detected      | 136.1 Detected    | 155.2 Detected    | 191.7 Detected    | Gpihbp1       | 1.304081633 | 1.05578231 | 1.40852314 | 1.140338  |
| A_66_P1194 | 1156.3 Detected   | 1222 Detected     | 1098.3 Detected   | 1507.9 Detected   | Foxk1         | 1.304073337 | 0.94984001 | 1.23396072 | 0.8987725 |
| A_51_P2141 | 3224.9 Detected   | 3170.7 Detected   | 3548.1 Detected   | 4205.2 Detected   | Stk17b        | 1.303978418 | 1.10022016 | 1.32626865 | 1.1190273 |
| A_55_P2043 | 15238.8 Detected  | 23784.4 Detected  | 13771.4 Detected  | 19870.2 Detected  | Slc12a4       | 1.303921569 | 0.90370633 | 0.83542995 | 0.5790098 |
| A_55_P2163 | 36.2 Detected     | 34.5 Detected     | 40.1 Detected     | 47.2 Detected     | LOC101055734  | 1.303867403 | 1.10773481 | 1.36811594 | 1.1623188 |
| A_66_P1329 | 144842.8 Detected | 174178.6 Detected | 148028 Detected   | 188854.6 Detected | Gm12618       | 1.30385908  | 1.02199074 | 1.08425834 | 0.8498633 |
| A_55_P2136 | 42491.7 Detected  | 83670.8 Detected  | 44972.3 Detected  | 55402.6 Detected  | Tom20         | 1.303845222 | 1.05837846 | 0.66214976 | 0.537491  |
| A_51_P4955 | 123.1 Detected    | 140.7 Detected    | 517.4 Detected    | 160.5 Detected    | Tlr1          | 1.303818034 | 4.20308692 | 1.14072495 | 3.6773276 |
| A_55_P2021 | 396.3 Detected    | 422.5 Detected    | 388.2 Detected    | 516.7 Detected    | Ptcd1         | 1.303810245 | 0.97956094 | 1.22295858 | 0.9188166 |
| A_55_P2009 | 17287.4 Detected  | 17793.5 Detected  | 26035.3 Detected  | 22539 Detected    | Dpf2          | 1.303781945 | 1.50602751 | 1.26669851 | 1.4631916 |
| A_55_P2081 | 651.5 Detected    | 686.2 Detected    | 667.2 Detected    | 849.4 Detected    | Rltpr         | 1.303760553 | 1.02409823 | 1.23783154 | 0.9723113 |
| A_52_P1502 | 42.8 Detected     | 42 Detected       | 41.8 Detected     | 55.8 Detected     | Apom          | 1.303738318 | 0.97663551 | 1.32857143 | 0.9952381 |
| A_51_P2711 | 65.2 Detected     | 86.8 Detected     | 44.3 Detected     | 85 Detected       | Olf1r166      | 1.303680982 | 0.67944785 | 0.97926267 | 0.5103687 |
| A_51_P1562 | 103.4 Detected    | 119.7 Detected    | 123.1 Detected    | 134.8 Detected    | F9            | 1.303675048 | 1.19052224 | 1.12614871 | 1.0284043 |
| A_51_P3156 | 1355.1 Detected   | 1327.1 Detected   | 1636.1 Detected   | 1766.6 Detected   | Nedd1         | 1.303667626 | 1.20736477 | 1.33117323 | 1.2328385 |
| A_55_P2037 | 17559.8 Detected  | 13630.8 Detected  | 20066 Detected    | 22891.9 Detected  | Plcd3         | 1.3036538   | 1.14272372 | 1.67942454 | 1.4721073 |
| A_51_P4932 | 603.7 Detected    | 680.1 Detected    | 633.3 Detected    | 787 Detected      | Pex10         | 1.30362763  | 1.04903098 | 1.15718277 | 0.9311866 |
| A_51_P3411 | 13509.4 Detected  | 12828.3 Detected  | 13341.7 Detected  | 17610.6 Detected  | Iqgap1        | 1.30358121  | 0.98758642 | 1.37279297 | 1.0400209 |
| A_55_P2345 | 22.4 Detected     | 42 Detected       | 32 Detected       | 29.2 Not Detect   | 2510016G02Rik | 1.303571429 | 1.42857143 | 0.6952381  | 0.7619048 |
| A_55_P2103 | 26079.3 Detected  | 35292.2 Detected  | 30185.3 Detected  | 33994.8 Detected  | Ptpla         | 1.303516582 | 1.15744288 | 0.96323834 | 0.8552966 |
| A_55_P2171 | 3201.6 Detected   | 2888.9 Detected   | 3285.3 Detected   | 4173.1 Detected   | Mkrn1         | 1.303442029 | 1.02614318 | 1.44452906 | 1.1372149 |
| A_51_P2327 | 924.8 Detected    | 907.8 Detected    | 887.4 Detected    | 1205.4 Detected   | Npff          | 1.303416955 | 0.95955882 | 1.32782551 | 0.9775281 |
| A_55_P2026 | 79.1 Detected     | 75.7 Detected     | 83.3 Detected     | 103.1 Detected    | Vprbp         | 1.303413401 | 1.05309735 | 1.36195509 | 1.1003963 |
| A_52_P5854 | 12890.6 Detected  | 13051.2 Detected  | 12230.8 Detected  | 16801.7 Detected  | Ptp4a2        | 1.303407134 | 0.94881542 | 1.28736821 | 0.9371399 |
| A_55_P2201 | 1206.9 Detected   | 1422.8 Detected   | 1110 Detected     | 1573 Detected     | Cyp2r1        | 1.303339133 | 0.91971166 | 1.10556649 | 0.7801518 |
| A_51_P2667 | 4430.7 Detected   | 4273.1 Detected   | 3608.5 Detected   | 5774.1 Detected   | Mfn2          | 1.303202654 | 0.81443113 | 1.35126723 | 0.8444689 |
| A_55_P2101 | 423.6 Detected    | 407.8 Detected    | 449.6 Detected    | 552 Detected      | Mrps25        | 1.303116147 | 1.06137866 | 1.35360471 | 1.1025012 |
| A_52_P6066 | 1076.2 Detected   | 1234.7 Detected   | 900.4 Detected    | 1402.4 Detected   | Tceb3         | 1.303103512 | 0.83664746 | 1.13582247 | 0.729246  |
| A_55_P1975 | 179191.1 Detected | 216398.9 Detected | 178253.8 Detected | 233500 Detected   | Gm10045       | 1.30307811  | 0.99476927 | 1.07902582 | 0.8237278 |
| A_51_P4684 | 1360.1 Detected   | 2275.6 Detected   | 1121.6 Detected   | 1772.2 Detected   | S100a3        | 1.302992427 | 0.82464525 | 0.77878362 | 0.492881  |
| A_55_P1956 | 114011.7 Detected | 137940.3 Detected | 114119.4 Detected | 148552.8 Detected | LOC100505283  | 1.302961012 | 1.00094464 | 1.07693546 | 0.8273101 |
| A_55_P2049 | 229.1 Detected    | 271.6 Detected    | 222.9 Detected    | 298.5 Detected    | Gm8149        | 1.302924487 | 0.97293758 | 1.09904271 | 0.8206922 |



|            |          |            |          |          |          |          |          |            |               |             |            |            |           |
|------------|----------|------------|----------|----------|----------|----------|----------|------------|---------------|-------------|------------|------------|-----------|
| A_55_P2158 | 138      | Detected   | 130.9    | Detected | 193.9    | Detected | 179.8    | Detected   | Odf3          | 1.302898551 | 1.40507246 | 1.37356761 | 1.4812834 |
| A_51_P1605 | 26294    | Detected   | 21116.2  | Detected | 45252.9  | Detected | 34258.3  | Detected   | Efemp2        | 1.302894196 | 1.72103522 | 1.6223705  | 2.1430418 |
| A_52_P3720 | 5489.7   | Detected   | 8196.8   | Detected | 5758.4   | Detected | 7152.3   | Detected   | Ddx21         | 1.30285808  | 1.04894621 | 0.87257222 | 0.7025181 |
| A_52_P3010 | 502.9    | Detected   | 806.7    | Detected | 329.4    | Detected | 655.2    | Detected   | Dctd          | 1.302843508 | 0.65500099 | 0.81219784 | 0.4083302 |
| A_51_P1330 | 9024.2   | Detected   | 6740.3   | Detected | 11111.1  | Detected | 11756.4  | Detected   | Glyr1         | 1.30276368  | 1.23125596 | 1.74419536 | 1.6484578 |
| A_55_P2045 | 467.4    | Detected   | 518.5    | Detected | 447.6    | Detected | 608.9    | Detected   | Mysm1         | 1.302738554 | 0.957638   | 1.17434908 | 0.8632594 |
| A_55_P2176 | 4927.8   | Detected   | 5198.4   | Detected | 5988.4   | Detected | 6419.6   | Detected   | Gm4858        | 1.302731442 | 1.21522789 | 1.23491844 | 1.1519698 |
| A_55_P2011 | 709.8    | Detected   | 630.1    | Detected | 692.2    | Detected | 924.6    | Detected   | Rnf214        | 1.302620456 | 0.97520428 | 1.46738613 | 1.0985558 |
| A_55_P2120 | 160.6    | Detected   | 166.6    | Detected | 153.8    | Detected | 209.2    | Detected   | BC018473      | 1.302615193 | 0.95765878 | 1.25570228 | 0.9231693 |
| A_51_P2671 | 5418.4   | Detected   | 4460.4   | Detected | 5520.5   | Detected | 7057.8   | Detected   | Faim          | 1.302561642 | 1.0188432  | 1.58232446 | 1.2376693 |
| A_52_P1340 | 4643     | Detected   | 3702.1   | Detected | 7376.6   | Detected | 6047.7   | Detected   | Cyhr1         | 1.30254146  | 1.58875727 | 1.63358634 | 1.9925448 |
| A_55_P2015 | 4845     | Detected   | 4662     | Detected | 4463.6   | Detected | 6309.4   | Detected   | Gpn2          | 1.302249742 | 0.92127967 | 1.35336765 | 0.9574432 |
| A_55_P2013 | 135.4    | Detected   | 130.7    | Detected | 133.1    | Detected | 176.3    | Detected   | LOC100861916  | 1.302067947 | 0.98301329 | 1.34889059 | 1.0183627 |
| A_55_P2117 | 102      | Detected   | 243      | Detected | 94.6     | Detected | 132.8    | Detected   | Vangl2        | 1.301960784 | 0.92745098 | 0.54650206 | 0.3893004 |
| A_55_P2308 | 141.1    | Detected   | 145.6    | Detected | 107.3    | Detected | 183.7    | Detected   | A430106A12Rik | 1.301913536 | 0.76045358 | 1.26167582 | 0.7369505 |
| A_55_P2416 | 31.8     | Detected   | 34.9     | Detected | 24.3     | Detected | 41.4     | Not Detect | Tmem175       | 1.301886792 | 0.76415094 | 1.18624642 | 0.6962751 |
| A_55_P2080 | 5801.3   | Detected   | 5525     | Detected | 6836.2   | Detected | 7552.5   | Detected   | Rab7          | 1.301863375 | 1.17839105 | 1.36696833 | 1.2373213 |
| A_51_P4321 | 4812.4   | Detected   | 6723.9   | Detected | 3876.6   | Detected | 6264.9   | Detected   | Sap30         | 1.301824453 | 0.80554401 | 0.93173605 | 0.5765404 |
| A_55_P1980 | 2303.3   | Detected   | 2134.5   | Detected | 2013.8   | Detected | 2998.3   | Detected   | Zfp488        | 1.30174098  | 0.87431077 | 1.40468494 | 0.9434528 |
| A_55_P2070 | 11.6     | Not Detect | 20       | Detected | 137.8    | Detected | 15.1     | Not Detect | Cxxc4         | 1.301724138 | 11.8793103 | 0.755      | 6.89      |
| A_55_P1993 | 257.9    | Detected   | 197      | Detected | 237.2    | Detected | 335.7    | Detected   | Tbc1d14       | 1.301667313 | 0.91973633 | 1.70406091 | 1.2040609 |
| A_55_P1969 | 2358.9   | Detected   | 1726.2   | Detected | 2217.8   | Detected | 3070.5   | Detected   | Slc36a1       | 1.301666031 | 0.94018398 | 1.7787626  | 1.2847874 |
| A_55_P2071 | 126.3    | Detected   | 127.9    | Detected | 71.8     | Detected | 164.4    | Detected   | Rasgef1c      | 1.301662708 | 0.56848773 | 1.2853792  | 0.5613761 |
| A_55_P1997 | 1349     | Detected   | 1624.4   | Detected | 1506.5   | Detected | 1755.8   | Detected   | Gyltl1b       | 1.301556709 | 1.11675315 | 1.08089141 | 0.9274194 |
| A_55_P2099 | 5167.7   | Detected   | 4097.1   | Detected | 4647.4   | Detected | 6726     | Detected   | Irak1         | 1.301546142 | 0.89931691 | 1.64164897 | 1.1343145 |
| A_55_P2149 | 288.9    | Detected   | 233.1    | Detected | 258.6    | Detected | 376      | Detected   | Agfg2         | 1.301488404 | 0.89511942 | 1.61304161 | 1.1093951 |
| A_52_P1995 | 11527    | Detected   | 12958.9  | Detected | 8074.4   | Detected | 15000.9  | Detected   | Kpna6         | 1.301370695 | 0.70047714 | 1.1575751  | 0.6230776 |
| A_51_P4317 | 297.8    | Detected   | 272.2    | Detected | 439.2    | Detected | 387.5    | Detected   | Ndufa3        | 1.301208865 | 1.47481531 | 1.4235856  | 1.6135195 |
| A_66_P1351 | 5703.5   | Detected   | 7044.6   | Detected | 5682.7   | Detected | 7421.4   | Detected   | Tmem161a      | 1.301201017 | 0.99635312 | 1.05348778 | 0.8066746 |
| A_55_P2056 | 35.2     | Detected   | 37.7     | Detected | 51.9     | Detected | 45.8     | Not Detect | Tk1           | 1.301136364 | 1.47443182 | 1.21485411 | 1.3766578 |
| A_51_P2119 | 5067.2   | Detected   | 4717.7   | Detected | 7189.5   | Detected | 6592.8   | Detected   | Lcmt1         | 1.301073571 | 1.41883091 | 1.39746063 | 1.5239418 |
| A_55_P1973 | 163138.4 | Detected   | 183158.7 | Detected | 151927.6 | Detected | 212242.6 | Detected   | Pde4c         | 1.30099719  | 0.93128043 | 1.15879071 | 0.8294861 |
| A_55_P2086 | 605.1    | Detected   | 639.4    | Detected | 585.1    | Detected | 787.2    | Detected   | Krt85         | 1.300941993 | 0.96694761 | 1.23115421 | 0.9150766 |
| A_52_P2582 | 668.6    | Detected   | 640.6    | Detected | 615      | Detected | 869.8    | Detected   | Proser1       | 1.300927311 | 0.91983249 | 1.35778957 | 0.9600375 |
| A_55_P2150 | 3168.1   | Detected   | 3707.6   | Detected | 2374.9   | Detected | 4121.4   | Detected   | Dnajc21       | 1.300905906 | 0.74962912 | 1.11160859 | 0.6405491 |
| A_51_P1946 | 571      | Detected   | 833.3    | Detected | 459.5    | Detected | 742.8    | Detected   | Pcid2         | 1.300875657 | 0.80472855 | 0.89139566 | 0.5514221 |
| A_55_P2174 | 41.9     | Detected   | 35.5     | Detected | 57.3     | Detected | 54.5     | Detected   | 9430038I01Rik | 1.30071599  | 1.36754177 | 1.53521127 | 1.6140845 |
| A_55_P2047 | 3540.1   | Detected   | 4229.1   | Detected | 4249.3   | Detected | 4604.6   | Detected   | Ppih          | 1.30069772  | 1.20033332 | 1.08878958 | 1.0047764 |
| A_52_P2086 | 4002.9   | Detected   | 5251.8   | Detected | 4190.2   | Detected | 5206.5   | Detected   | Bms1          | 1.300682006 | 1.04679108 | 0.99137439 | 0.7978598 |
| A_51_P1200 | 4501.3   | Detected   | 4025.3   | Detected | 4825.7   | Detected | 5854.7   | Detected   | Snx10         | 1.300668696 | 1.07206807 | 1.45447544 | 1.1988423 |

|            |          |          |          |            |          |            |          |            |               |             |            |            |           |
|------------|----------|----------|----------|------------|----------|------------|----------|------------|---------------|-------------|------------|------------|-----------|
| A_52_P3596 | 338      | Detected | 505.7    | Detected   | 426.5    | Detected   | 439.6    | Detected   | Dohh          | 1.300591716 | 1.26183432 | 0.86929009 | 0.8433854 |
| A_55_P2021 | 4811.1   | Detected | 5607.9   | Detected   | 5148.5   | Detected   | 6256.5   | Detected   | Zfml          | 1.300430255 | 1.07012949 | 1.11565827 | 0.9180799 |
| A_55_P2019 | 23.3     | Detected | 29.4     | Detected   | 29.8     | Detected   | 30.3     | Not Detect | Lrrtm1        | 1.300429185 | 1.27896996 | 1.03061224 | 1.0136054 |
| A_55_P1971 | 31.3     | Detected | 21.2     | Detected   | 35.2     | Detected   | 40.7     | Not Detect | 170002211Rik  | 1.300319489 | 1.12460064 | 1.91981132 | 1.6603774 |
| A_55_P2016 | 2133.8   | Detected | 2133.9   | Detected   | 2178.6   | Detected   | 2774.4   | Detected   | Nova2         | 1.300215578 | 1.02099541 | 1.30015465 | 1.0209476 |
| A_55_P2077 | 354.2    | Detected | 264.2    | Detected   | 306.7    | Detected   | 460.5    | Detected   | Vps8          | 1.300112931 | 0.86589497 | 1.74299773 | 1.160863  |
| A_55_P2117 | 132.3    | Detected | 146.9    | Detected   | 142.5    | Detected   | 172      | Detected   | 1700007K09Rik | 1.300075586 | 1.07709751 | 1.17086453 | 0.9700477 |
| A_55_P2084 | 3487.4   | Detected | 2866.5   | Detected   | 5202     | Detected   | 4533.5   | Detected   | B4galt6       | 1.29996559  | 1.49165567 | 1.58154544 | 1.8147567 |
| A_51_P4226 | 4701     | Detected | 6193     | Detected   | 5432.8   | Detected   | 6110.8   | Detected   | Tbpl1         | 1.29989364  | 1.15566901 | 0.98672695 | 0.8772485 |
| A_51_P3868 | 5246.9   | Detected | 4284.7   | Detected   | 6336.7   | Detected   | 6820.2   | Detected   | Gmppb         | 1.299853247 | 1.2077036  | 1.59175672 | 1.4789133 |
| A_55_P2145 | 38361.9  | Detected | 46368.3  | Detected   | 45866.7  | Detected   | 49863.2  | Detected   | Atp5f1        | 1.299810489 | 1.1956316  | 1.07537261 | 0.9891823 |
| A_55_P2035 | 4127     | Detected | 4859.6   | Detected   | 5406.3   | Detected   | 5363.5   | Detected   | Pgap2         | 1.299612309 | 1.30998304 | 1.10369166 | 1.112499  |
| A_55_P2016 | 30309.9  | Detected | 31083.3  | Detected   | 39384.5  | Detected   | 39390.8  | Detected   | Nfu1          | 1.29960178  | 1.29939393 | 1.2672657  | 1.267063  |
| A_55_P2168 | 172382.3 | Detected | 188573.7 | Detected   | 185679.5 | Detected   | 224022.3 | Detected   | Tmsb10        | 1.299566719 | 1.07713785 | 1.18798274 | 0.9846522 |
| A_51_P2999 | 2183.3   | Detected | 2886.1   | Detected   | 2468.2   | Detected   | 2837.3   | Detected   | BC048403      | 1.299546558 | 1.13049054 | 0.98309137 | 0.8552025 |
| A_55_P2186 | 4047.6   | Detected | 3688.8   | Detected   | 7270.1   | Detected   | 5259.4   | Detected   | Tmem242       | 1.299387291 | 1.79615081 | 1.42577532 | 1.9708577 |
| A_66_P1306 | 223.5    | Detected | 125.7    | Detected   | 207.8    | Detected   | 290.4    | Detected   | 2810408A11Rik | 1.299328859 | 0.92975391 | 2.31026253 | 1.6531424 |
| A_66_P1153 | 11457.3  | Detected | 18365.6  | Detected   | 10905.5  | Detected   | 14886.6  | Detected   | Cirh1a        | 1.299311356 | 0.95183857 | 0.81056976 | 0.5938004 |
| A_51_P3448 | 5870.4   | Detected | 8215     | Detected   | 7890.8   | Detected   | 7626.3   | Detected   | Thop1         | 1.299110793 | 1.34416735 | 0.92833841 | 0.9605356 |
| A_52_P8903 | 5026.9   | Detected | 5135.4   | Detected   | 5157.6   | Detected   | 6530.3   | Detected   | Tmem251       | 1.299070998 | 1.02600012 | 1.27162441 | 1.0043229 |
| A_51_P3184 | 985.9    | Detected | 1043.3   | Detected   | 1224.7   | Detected   | 1280.7   | Detected   | Ap1ar         | 1.299016127 | 1.24221523 | 1.22754721 | 1.1738714 |
| A_55_P2096 | 30.1     | Detected | 27.7     | Detected   | 18.3     | Not Detect | 39.1     | Not Detect | Ssxb9         | 1.299003322 | 0.60797342 | 1.41155235 | 0.6606498 |
| A_55_P2018 | 17.4     | Detected | 10.3     | Not Detect | 15.5     | Detected   | 22.6     | Not Detect | Pabpc4l       | 1.298850575 | 0.8908046  | 2.19417476 | 1.5048544 |
| A_55_P2422 | 8426.7   | Detected | 9422.9   | Detected   | 9160.4   | Detected   | 10943.7  | Detected   | 5031425E22Rik | 1.298693439 | 1.08706848 | 1.16139405 | 0.9721423 |
| A_55_P2040 | 4399     | Detected | 5173.9   | Detected   | 3464.8   | Detected   | 5712.5   | Detected   | Upf3a         | 1.298590589 | 0.78763355 | 1.10409942 | 0.6696689 |
| A_55_P2220 | 314.2    | Detected | 266.6    | Detected   | 337.9    | Detected   | 408      | Detected   | 4932416H05Rik | 1.298535964 | 1.07542966 | 1.5303826  | 1.2674419 |
| A_55_P2326 | 117.3    | Detected | 99.3     | Detected   | 90.2     | Detected   | 152.3    | Detected   | 2810405F17Rik | 1.298380222 | 0.76896846 | 1.53373615 | 0.9083585 |
| A_51_P2603 | 985      | Detected | 833.2    | Detected   | 863.1    | Detected   | 1278.9   | Detected   | Ikbkg         | 1.298375635 | 0.87624365 | 1.53492559 | 1.0358857 |
| A_55_P2130 | 127.7    | Detected | 144.6    | Detected   | 149.6    | Detected   | 165.8    | Detected   | Zfp599        | 1.298355521 | 1.17149569 | 1.14661134 | 1.0345781 |
| A_55_P2016 | 256.5    | Detected | 333      | Detected   | 200.7    | Detected   | 333      | Detected   | Cd22          | 1.298245614 | 0.78245614 | 1          | 0.6027027 |
| A_55_P2020 | 98875.2  | Detected | 104932.1 | Detected   | 121225.6 | Detected   | 128357.4 | Detected   | Cycc          | 1.298175882 | 1.22604657 | 1.22324246 | 1.1552766 |
| A_55_P2046 | 59.7     | Detected | 59.4     | Detected   | 78       | Detected   | 77.5     | Detected   | Olf1311       | 1.298157454 | 1.30653266 | 1.3047138  | 1.3131313 |
| A_52_P3302 | 8105.5   | Detected | 7371.6   | Detected   | 6874     | Detected   | 10521.9  | Detected   | Fanca         | 1.298118561 | 0.84806613 | 1.42735634 | 0.9324977 |
| A_51_P3284 | 145.3    | Detected | 155.9    | Detected   | 154.8    | Detected   | 188.6    | Detected   | Zfp423        | 1.298004129 | 1.06538197 | 1.20974984 | 0.9929442 |
| A_55_P2066 | 26594    | Detected | 15688.5  | Detected   | 29241.1  | Detected   | 34518.6  | Detected   | Bcl3          | 1.297984508 | 1.09953749 | 2.20024859 | 1.8638557 |
| A_66_P1259 | 22.5     | Detected | 17.2     | Detected   | 17.2     | Detected   | 29.2     | Not Detect | Cntn2         | 1.297777778 | 0.76444444 | 1.69767442 | 1         |
| A_55_P1988 | 233.1    | Detected | 203.2    | Detected   | 185.6    | Detected   | 302.5    | Detected   | Gm2347        | 1.297726298 | 0.7962248  | 1.4886811  | 0.9133858 |
| A_55_P2105 | 83.3     | Detected | 91.3     | Detected   | 63.5     | Detected   | 108.1    | Detected   | Ccdc18        | 1.297719088 | 0.76230492 | 1.18400876 | 0.6955093 |
| A_55_P2103 | 545.8    | Detected | 474.4    | Detected   | 714.1    | Detected   | 708.2    | Detected   | Cox15         | 1.297544888 | 1.30835471 | 1.49283305 | 1.5052698 |
| A_51_P3222 | 969.3    | Detected | 1054.9   | Detected   | 813.5    | Detected   | 1257.7   | Detected   | Tecpr2        | 1.297534303 | 0.83926545 | 1.19224571 | 0.7711631 |

|            |         |            |          |            |          |            |          |            |               |             |            |            |           |
|------------|---------|------------|----------|------------|----------|------------|----------|------------|---------------|-------------|------------|------------|-----------|
| A_55_P1961 | 134.8   | Detected   | 116.3    | Detected   | 109.4    | Detected   | 174.9    | Detected   | Grid2ip       | 1.297477745 | 0.8115727  | 1.5038693  | 0.9406707 |
| A_52_P8789 | 1108.8  | Detected   | 1005.1   | Detected   | 1229.4   | Detected   | 1438.6   | Detected   | Fam175b       | 1.297438672 | 1.10876623 | 1.43130037 | 1.2231619 |
| A_65_P2043 | 2656.1  | Detected   | 2614.9   | Detected   | 3013.8   | Detected   | 3446.1   | Detected   | Parppb        | 1.297428561 | 1.13467113 | 1.31787066 | 1.1525489 |
| A_55_P2036 | 1706.4  | Detected   | 1873.7   | Detected   | 1906.5   | Detected   | 2213.9   | Detected   | Med24         | 1.297409752 | 1.11726442 | 1.18156589 | 1.0175055 |
| A_52_P1310 | 38      | Detected   | 29.7     | Detected   | 58.9     | Detected   | 49.3     | Detected   | Krtap8-1      | 1.297368421 | 1.55       | 1.65993266 | 1.983165  |
| A_51_P2115 | 1285    | Detected   | 1634     | Detected   | 918.1    | Detected   | 1667.1   | Detected   | Wdr47         | 1.297354086 | 0.71447471 | 1.02025704 | 0.5618727 |
| A_51_P3091 | 3650.6  | Detected   | 4081     | Detected   | 4088.3   | Detected   | 4736.1   | Detected   | Pxmp2         | 1.297348381 | 1.1198981  | 1.16052438 | 1.0017888 |
| A_52_P1505 | 4407.8  | Detected   | 4903.1   | Detected   | 6087.9   | Detected   | 5718.4   | Detected   | Usp39         | 1.29733654  | 1.38116521 | 1.16628256 | 1.241643  |
| A_55_P2047 | 14.8    | Detected   | 10.9     | Not Detect | 11.7     | Not Detect | 19.2     | Not Detect | Oog4          | 1.297297297 | 0.79054054 | 1.76146789 | 1.0733945 |
| A_55_P2268 | 197.5   | Detected   | 216.4    | Detected   | 214.2    | Detected   | 256.2    | Detected   | 9330199G10Rik | 1.29721519  | 1.08455696 | 1.18391867 | 0.9898336 |
| A_55_P2132 | 1800.4  | Detected   | 7741.9   | Detected   | 2309.7   | Detected   | 2335.5   | Detected   | Ngef          | 1.297211731 | 1.28288158 | 0.30167013 | 0.2983376 |
| A_51_P3141 | 2229.2  | Detected   | 2571.6   | Detected   | 3060.1   | Detected   | 2891.7   | Detected   | Qtrt1         | 1.297191818 | 1.37273461 | 1.12447503 | 1.1899596 |
| A_66_P1010 | 59.9    | Detected   | 78.5     | Detected   | 62.4     | Detected   | 77.7     | Detected   | Tssk4         | 1.297161937 | 1.04173623 | 0.98980892 | 0.7949045 |
| A_51_P3797 | 97069.3 | Detected   | 114914.8 | Detected   | 131410.3 | Detected   | 125913.2 | Detected   | Rpn1          | 1.297147502 | 1.35377818 | 1.09570917 | 1.1435455 |
| A_55_P2074 | 105     | Detected   | 96.5     | Detected   | 109.6    | Detected   | 136.2    | Detected   | Gm7932        | 1.297142857 | 1.04380952 | 1.41139896 | 1.1357513 |
| A_51_P2548 | 130.6   | Detected   | 146.6    | Detected   | 104.6    | Detected   | 169.4    | Detected   | Cyp4a10       | 1.297090352 | 0.80091884 | 1.15552524 | 0.7135061 |
| A_55_P2094 | 146.1   | Detected   | 155.8    | Detected   | 226.5    | Detected   | 189.5    | Detected   | Fgfr2         | 1.29705681  | 1.55030801 | 1.21630295 | 1.4537869 |
| A_55_P2154 | 4673.1  | Detected   | 4220.4   | Detected   | 4399.7   | Detected   | 6061     | Detected   | Smarca4       | 1.29699771  | 0.94149494 | 1.4361198  | 1.0424841 |
| A_55_P2073 | 9286.8  | Detected   | 10866.6  | Detected   | 13610.8  | Detected   | 12044.9  | Detected   | Commd5        | 1.296991429 | 1.4656071  | 1.10843318 | 1.2525353 |
| A_51_P5209 | 5432.4  | Detected   | 6084.5   | Detected   | 8995.7   | Detected   | 7045.3   | Detected   | Bcar3         | 1.296903763 | 1.65593476 | 1.15790944 | 1.4784617 |
| A_55_P2080 | 19.2    | Detected   | 15.9     | Detected   | 14.4     | Not Detect | 24.9     | Not Detect | Cmtm5         | 1.296875    | 0.75       | 1.56603774 | 0.9056604 |
| A_55_P2136 | 1612.2  | Detected   | 1602.3   | Detected   | 1832.4   | Detected   | 2090.8   | Detected   | Gm8675        | 1.296861432 | 1.13658355 | 1.30487424 | 1.1436061 |
| A_52_P6361 | 11028.6 | Detected   | 10630.9  | Detected   | 11783.9  | Detected   | 14301.9  | Detected   | Golph3        | 1.296801045 | 1.06848557 | 1.34531413 | 1.1084574 |
| A_55_P1998 | 2882.5  | Detected   | 4149     | Detected   | 2450.7   | Detected   | 3738     | Detected   | Ifi47         | 1.29679098  | 0.85019948 | 0.90093999 | 0.5906725 |
| A_52_P9140 | 14974.1 | Detected   | 15670.8  | Detected   | 15676.8  | Detected   | 19417.8  | Detected   | Zcchc17       | 1.296759071 | 1.0469277  | 1.23910713 | 1.0003829 |
| A_51_P3780 | 1757.2  | Detected   | 2074.9   | Detected   | 1835     | Detected   | 2278.5   | Detected   | Blzf1         | 1.296665149 | 1.04427498 | 1.09812521 | 0.88438   |
| A_55_P2412 | 11.8    | Not Detect | 16.6     | Detected   | 12.1     | Not Detect | 15.3     | Not Detect | 2210011G09Rik | 1.296610169 | 1.02542373 | 0.92168675 | 0.7289157 |
| A_52_P5876 | 1423.3  | Detected   | 2093.9   | Detected   | 1402.1   | Detected   | 1845.3   | Detected   | Ddx19a        | 1.296494063 | 0.98510504 | 0.88127418 | 0.6696117 |
| A_55_P1965 | 11049.5 | Detected   | 7885.7   | Detected   | 12409.6  | Detected   | 14323.8  | Detected   | Naa60         | 1.296330151 | 1.12309154 | 1.8164272  | 1.573684  |
| A_55_P2013 | 15.2    | Not Detect | 27.1     | Detected   | 29.9     | Detected   | 19.7     | Not Detect | 2410125D13Rik | 1.296052632 | 1.96710526 | 0.72693727 | 1.103321  |
| A_52_P5844 | 876.8   | Detected   | 969.3    | Detected   | 688.1    | Detected   | 1136.2   | Detected   | Cars2         | 1.29584854  | 0.78478558 | 1.17218611 | 0.7098937 |
| A_55_P2159 | 32.8    | Detected   | 37.9     | Detected   | 25.3     | Detected   | 42.5     | Not Detect | Pfn2          | 1.295731707 | 0.77134146 | 1.12137203 | 0.6675462 |
| A_66_P1306 | 175.5   | Detected   | 178.3    | Detected   | 185.8    | Detected   | 227.4    | Detected   | Hist1h4h      | 1.295726496 | 1.05868946 | 1.27537858 | 1.0420639 |
| A_55_P2267 | 226.9   | Detected   | 205.4    | Detected   | 197      | Detected   | 294      | Detected   | Rufy2         | 1.295724989 | 0.86822389 | 1.43135346 | 0.9591042 |
| A_51_P2074 | 3943.1  | Detected   | 5659.5   | Detected   | 4779.5   | Detected   | 5109.1   | Detected   | Pwp1          | 1.295706424 | 1.21211737 | 0.90274759 | 0.8445092 |
| A_55_P1976 | 5601.9  | Detected   | 6146.4   | Detected   | 6754.3   | Detected   | 7258.3   | Detected   | Snrnp35       | 1.295685392 | 1.20571592 | 1.18090264 | 1.0989034 |
| A_55_P2039 | 18479.2 | Detected   | 21497.7  | Detected   | 21262.6  | Detected   | 23943.1  | Detected   | Mat2b         | 1.295678384 | 1.1506234  | 1.1137517  | 0.9890639 |
| A_52_P4065 | 1393.2  | Detected   | 1328.3   | Detected   | 1659     | Detected   | 1805.1   | Detected   | Mus81         | 1.295650301 | 1.19078381 | 1.35895506 | 1.2489648 |
| A_55_P2056 | 2556.4  | Detected   | 1438.2   | Detected   | 2703.1   | Detected   | 3312.2   | Detected   | Akap13        | 1.295650133 | 1.05738539 | 2.30301766 | 1.8795022 |
| A_52_P6281 | 276.1   | Detected   | 304.1    | Detected   | 270.7    | Detected   | 357.7    | Detected   | Zfp592        | 1.295545092 | 0.98044187 | 1.17625781 | 0.8901677 |

|            |          |            |          |          |          |            |          |            |               |             |            |            |           |
|------------|----------|------------|----------|----------|----------|------------|----------|------------|---------------|-------------|------------|------------|-----------|
| A_55_P2026 | 187.8    | Detected   | 172.9    | Detected | 242.7    | Detected   | 243.3    | Detected   | Fmo5          | 1.295527157 | 1.29233227 | 1.40717178 | 1.4037016 |
| A_55_P1953 | 13765.9  | Detected   | 15520.3  | Detected | 19168.1  | Detected   | 17833.8  | Detected   | Ece2          | 1.295505561 | 1.39243348 | 1.14906284 | 1.2350341 |
| A_55_P2065 | 56.2     | Detected   | 33.9     | Detected | 28.6     | Detected   | 72.8     | Detected   | Syt15         | 1.295373665 | 0.5088968  | 2.14749263 | 0.8436578 |
| A_51_P5130 | 1393.4   | Detected   | 1249.5   | Detected | 1514.9   | Detected   | 1804.7   | Detected   | Rdh13         | 1.295177264 | 1.08719678 | 1.44433774 | 1.212405  |
| A_55_P2171 | 112645.4 | Detected   | 151115.5 | Detected | 129721.5 | Detected   | 145888.9 | Detected   | Oaz1          | 1.295116356 | 1.15159163 | 0.96541321 | 0.8584262 |
| A_55_P2013 | 9188.8   | Detected   | 8732     | Detected | 10326    | Detected   | 11900.2  | Detected   | Slc25a19      | 1.295076615 | 1.12375936 | 1.36282639 | 1.182547  |
| A_55_P2032 | 126315.7 | Detected   | 160481.3 | Detected | 137489.5 | Detected   | 163586.8 | Detected   | Rpl13         | 1.295063084 | 1.08845931 | 1.01935116 | 0.8567322 |
| A_51_P3928 | 1284.5   | Detected   | 1375.6   | Detected | 1788.9   | Detected   | 1663.4   | Detected   | Pex12         | 1.294978591 | 1.39268198 | 1.2092178  | 1.3004507 |
| A_52_P1425 | 1314.1   | Detected   | 1083.8   | Detected | 1094.2   | Detected   | 1701.6   | Detected   | Phc3          | 1.294878624 | 0.83266114 | 1.57003137 | 1.0095959 |
| A_51_P5016 | 934      | Detected   | 539.4    | Detected | 1163.3   | Detected   | 1209.4   | Detected   | Kdelc2        | 1.294860814 | 1.24550321 | 2.24212088 | 2.1566555 |
| A_51_P2360 | 3224.5   | Detected   | 2986.1   | Detected | 3422.6   | Detected   | 4175.2   | Detected   | Rnf40         | 1.294836409 | 1.06143588 | 1.39821171 | 1.1461773 |
| A_51_P5081 | 50.2     | Detected   | 56.3     | Detected | 54.2     | Detected   | 65       | Detected   | Trank1        | 1.294820717 | 1.07968127 | 1.15452931 | 0.9626998 |
| A_55_P2028 | 1112.3   | Detected   | 1855.8   | Detected | 1456.3   | Detected   | 1440.2   | Detected   | Uchl3         | 1.29479457  | 1.30926908 | 0.77605345 | 0.784729  |
| A_55_P2021 | 852.6    | Detected   | 812.4    | Detected | 1028.2   | Detected   | 1103.9   | Detected   | Ccdc114       | 1.294745484 | 1.20595825 | 1.35881339 | 1.2656327 |
| A_55_P1953 | 22.4     | Detected   | 22.5     | Detected | 31.3     | Detected   | 29       | Not Detect | Lrrc4b        | 1.294642857 | 1.39732143 | 1.28888889 | 1.3911111 |
| A_66_P1053 | 16.3     | Detected   | 23.8     | Detected | 16.9     | Not Detect | 21.1     | Not Detect | Cacna2d4      | 1.294478528 | 1.03680982 | 0.88655462 | 0.710084  |
| A_55_P2107 | 30852.9  | Detected   | 29622.4  | Detected | 33229    | Detected   | 39934.1  | Detected   | Rab5c         | 1.29433862  | 1.07701383 | 1.34810481 | 1.1217525 |
| A_51_P1768 | 498.1    | Detected   | 537.9    | Detected | 651.4    | Detected   | 644.7    | Detected   | 2700050L05Rik | 1.29431841  | 1.30776952 | 1.19854992 | 1.2110058 |
| A_66_P1280 | 48.6     | Detected   | 49.3     | Detected | 45.1     | Detected   | 62.9     | Detected   | Map7d2        | 1.294238683 | 0.92798354 | 1.27586207 | 0.9148073 |
| A_55_P2006 | 814      | Detected   | 838.2    | Detected | 938.8    | Detected   | 1053.5   | Detected   | Pi4kb         | 1.294226044 | 1.15331695 | 1.25685994 | 1.1200191 |
| A_55_P2077 | 4144.5   | Detected   | 3288.3   | Detected | 4507.8   | Detected   | 5363.6   | Detected   | Oxsr1         | 1.294148872 | 1.08765834 | 1.63111638 | 1.3708603 |
| A_52_P2511 | 578.7    | Detected   | 504.8    | Detected | 752.9    | Detected   | 748.9    | Detected   | Tmem177       | 1.294107482 | 1.30101953 | 1.48355784 | 1.4914818 |
| A_51_P2959 | 218.3    | Detected   | 410.7    | Detected | 261.4    | Detected   | 282.5    | Detected   | Proc          | 1.294090701 | 1.19743472 | 0.68785001 | 0.6364743 |
| A_55_P2147 | 12508.2  | Detected   | 14990.6  | Detected | 13951.5  | Detected   | 16186.2  | Detected   | Ak2           | 1.294047105 | 1.11538831 | 1.07975665 | 0.9306832 |
| A_52_P4897 | 91295.4  | Detected   | 104549.1 | Detected | 113253.5 | Detected   | 118124.7 | Detected   | Sec61a1       | 1.293873514 | 1.24051705 | 1.12984904 | 1.0832566 |
| A_55_P1967 | 85191.3  | Detected   | 68937.2  | Detected | 100007.6 | Detected   | 110221.9 | Detected   | Plxnb2        | 1.293816387 | 1.17391799 | 1.59887405 | 1.4507059 |
| A_55_P2013 | 185.5    | Detected   | 214.4    | Detected | 197.2    | Detected   | 240      | Detected   | Tubg2         | 1.293800539 | 1.06307278 | 1.11940299 | 0.9197761 |
| A_66_P1287 | 7035.1   | Detected   | 11070.9  | Detected | 10614.6  | Detected   | 9101.7   | Detected   | Nup43         | 1.293755597 | 1.50880584 | 0.82212828 | 0.9587838 |
| A_55_P2127 | 12.6     | Not Detect | 19.1     | Detected | 15.3     | Detected   | 16.3     | Not Detect | 6330403A02Rik | 1.293650794 | 1.21428571 | 0.85340314 | 0.8010471 |
| A_55_P2164 | 23.5     | Detected   | 27.2     | Detected | 20.8     | Detected   | 30.4     | Not Detect | 5830415F09Rik | 1.293617021 | 0.88510638 | 1.11764706 | 0.7647059 |
| A_66_P1249 | 109      | Detected   | 109.2    | Detected | 130.3    | Detected   | 141      | Detected   | Slc36a4       | 1.293577982 | 1.19541284 | 1.29120879 | 1.1932234 |
| A_55_P1997 | 436.3    | Detected   | 582.6    | Detected | 328.9    | Detected   | 564.3    | Detected   | Zfp68         | 1.293376117 | 0.7538391  | 0.96858908 | 0.5645383 |
| A_51_P2754 | 405      | Detected   | 541.2    | Detected | 397.9    | Detected   | 523.8    | Detected   | BC026762      | 1.293333333 | 0.98246914 | 0.96784922 | 0.735218  |
| A_51_P3786 | 264.9    | Detected   | 273.2    | Detected | 244.6    | Detected   | 342.6    | Detected   | Sohlh2        | 1.293318233 | 0.92336731 | 1.25402635 | 0.8953148 |
| A_55_P2037 | 28195.7  | Detected   | 33005.8  | Detected | 28074.4  | Detected   | 36465.5  | Detected   | Smc4          | 1.293300042 | 0.99569793 | 1.10482097 | 0.8505899 |
| A_52_P4231 | 1708.4   | Detected   | 1351.4   | Detected | 1812.9   | Detected   | 2209.2   | Detected   | Acaa1b        | 1.29313978  | 1.06116834 | 1.63474915 | 1.3414977 |
| A_51_P1465 | 3304.9   | Detected   | 3519.6   | Detected | 2687.4   | Detected   | 4273.4   | Detected   | Atp11b        | 1.293049714 | 0.81315622 | 1.21417207 | 0.7635527 |
| A_55_P2088 | 1161.3   | Detected   | 1157.5   | Detected | 957      | Detected   | 1501.4   | Detected   | Hcn2          | 1.292861448 | 0.82407647 | 1.29710583 | 0.8267819 |
| A_55_P2003 | 1986.1   | Detected   | 2511.4   | Detected | 2412.6   | Detected   | 2567.6   | Detected   | Pla2g6        | 1.292784855 | 1.21474246 | 1.02237796 | 0.9606594 |
| A_66_P1208 | 2171.5   | Detected   | 2352.3   | Detected | 2354     | Detected   | 2807     | Detected   | Nfkbib        | 1.292654847 | 1.08404329 | 1.19330017 | 1.0007227 |

|            |         |          |         |          |          |          |          |            |               |             |            |            |           |
|------------|---------|----------|---------|----------|----------|----------|----------|------------|---------------|-------------|------------|------------|-----------|
| A_55_P2083 | 199.6   | Detected | 151.8   | Detected | 194.9    | Detected | 258      | Detected   | Sp8           | 1.29258517  | 0.97645291 | 1.69960474 | 1.2839262 |
| A_51_P4732 | 4709.3  | Detected | 4705.7  | Detected | 5790.1   | Detected | 6087     | Detected   | Zfp426        | 1.292548786 | 1.22950332 | 1.29353762 | 1.2304439 |
| A_55_P2139 | 29.4    | Detected | 31.8    | Detected | 30.6     | Detected | 38       | Not Detect | Fgf13         | 1.292517007 | 1.04081633 | 1.19496855 | 0.9622642 |
| A_55_P2060 | 8519.6  | Detected | 9287.1  | Detected | 11448.5  | Detected | 11011.7  | Detected   | 3110062M04Rik | 1.292513733 | 1.34378375 | 1.18569844 | 1.2327314 |
| A_51_P1892 | 5250.1  | Detected | 6774    | Detected | 6795.1   | Detected | 6785.7   | Detected   | 4933417G07Rik | 1.292489667 | 1.29428011 | 1.00172719 | 1.0031149 |
| A_51_P5028 | 78015.5 | Detected | 74222.4 | Detected | 112006.1 | Detected | 100824.2 | Detected   | 2200002D01Rik | 1.292361133 | 1.43569034 | 1.35840663 | 1.5090606 |
| A_55_P2004 | 945.2   | Detected | 1445.1  | Detected | 1048.7   | Detected | 1221.5   | Detected   | Cyb5r1        | 1.292319086 | 1.10950063 | 0.84527022 | 0.7256937 |
| A_55_P2005 | 9712.5  | Detected | 10852.6 | Detected | 11710.8  | Detected | 12550.4  | Detected   | Mbnl1         | 1.292190476 | 1.20574517 | 1.15644177 | 1.0790778 |
| A_55_P2002 | 3170.8  | Detected | 4059    | Detected | 3185     | Detected | 4097.2   | Detected   | Bre           | 1.292166015 | 1.00447837 | 1.00941119 | 0.784676  |
| A_51_P2290 | 217.7   | Detected | 225.5   | Detected | 328.5    | Detected | 281.3    | Detected   | Rhbdd1        | 1.292145154 | 1.50895728 | 1.24745011 | 1.4567627 |
| A_55_P2064 | 5319.1  | Detected | 6849.7  | Detected | 6121.3   | Detected | 6873     | Detected   | Ipo8          | 1.292135888 | 1.15081499 | 1.00340161 | 0.8936596 |
| A_55_P2058 | 21152.9 | Detected | 19699.4 | Detected | 19106.3  | Detected | 27332.2  | Detected   | Cap1          | 1.29212543  | 0.90324731 | 1.38746358 | 0.9698925 |
| A_66_P1311 | 402.8   | Detected | 476.1   | Detected | 481.5    | Detected | 520.4    | Detected   | Zfp473        | 1.291956306 | 1.19538232 | 1.09304768 | 1.0113422 |
| A_52_P5058 | 846.2   | Detected | 754     | Detected | 980      | Detected | 1093.2   | Detected   | Cyb5r4        | 1.291893169 | 1.15811865 | 1.44986737 | 1.2997347 |
| A_51_P3106 | 16319.5 | Detected | 12784.4 | Detected | 12086.2  | Detected | 21082.9  | Detected   | Arsa          | 1.291883943 | 0.74059867 | 1.64911142 | 0.9453866 |
| A_55_P1952 | 518.9   | Detected | 538     | Detected | 514.9    | Detected | 670.3    | Detected   | Cyp4f18       | 1.291771054 | 0.99229139 | 1.24591078 | 0.9570632 |
| A_55_P2112 | 688.7   | Detected | 369.8   | Detected | 568.9    | Detected | 889.6    | Detected   | Slc4a3        | 1.291709017 | 0.82604908 | 2.40562466 | 1.5383991 |
| A_52_P3742 | 916.7   | Detected | 1363    | Detected | 1081.7   | Detected | 1184.1   | Detected   | Tefm          | 1.291698484 | 1.17999345 | 0.86874541 | 0.793617  |
| A_51_P3060 | 10465.5 | Detected | 14022.8 | Detected | 13434.9  | Detected | 13517.3  | Detected   | Sec13         | 1.291605752 | 1.28373226 | 0.96395156 | 0.9580754 |
| A_51_P4037 | 1916.3  | Detected | 1672.4  | Detected | 1470.5   | Detected | 2475     | Detected   | Braf          | 1.291551427 | 0.76736419 | 1.47990911 | 0.8792753 |
| A_55_P2073 | 641.9   | Detected | 640.6   | Detected | 741.7    | Detected | 829      | Detected   | Fgf6          | 1.291478423 | 1.15547593 | 1.29409928 | 1.1578208 |
| A_51_P1243 | 173.6   | Detected | 201.4   | Detected | 138.6    | Detected | 224.2    | Detected   | Olf414        | 1.291474654 | 0.7983871  | 1.11320755 | 0.6881827 |
| A_52_P4787 | 1179.3  | Detected | 1134.9  | Detected | 1914.3   | Detected | 1523     | Detected   | Atg2a         | 1.291444077 | 1.62325108 | 1.34196846 | 1.6867565 |
| A_55_P2002 | 534.7   | Detected | 592.9   | Detected | 568.8    | Detected | 690.5    | Detected   | Zfp619        | 1.291378343 | 1.06377408 | 1.16461461 | 0.9593523 |
| A_55_P2022 | 122.2   | Detected | 97.3    | Detected | 131.5    | Detected | 157.8    | Detected   | Trpc1         | 1.291325696 | 1.07610475 | 1.62178828 | 1.3514902 |
| A_55_P2335 | 640.9   | Detected | 402.3   | Detected | 664.2    | Detected | 827.6    | Detected   | 4921531C22Rik | 1.291309097 | 1.03635513 | 2.05717127 | 1.6510067 |
| A_55_P1989 | 310.5   | Detected | 287.6   | Detected | 290.1    | Detected | 400.9    | Detected   | Tcte1         | 1.291143317 | 0.93429952 | 1.39394993 | 1.0086926 |
| A_55_P1954 | 450     | Detected | 374.2   | Detected | 343.6    | Detected | 581      | Detected   | Wdr44         | 1.291111111 | 0.76355556 | 1.55264564 | 0.9182255 |
| A_51_P3846 | 9308.7  | Detected | 10201.3 | Detected | 10347.8  | Detected | 12018.3  | Detected   | Mrpl10        | 1.291082536 | 1.11162676 | 1.17811455 | 1.0143609 |
| A_55_P2084 | 2142.1  | Detected | 2401    | Detected | 2330.1   | Detected | 2765.6   | Detected   | Zkscan6       | 1.291069511 | 1.08776434 | 1.15185339 | 0.9704706 |
| A_55_P1992 | 341.2   | Detected | 335.9   | Detected | 375.2    | Detected | 440.5    | Detected   | P2rx3         | 1.291031653 | 1.0996483  | 1.3114022  | 1.1169991 |
| A_55_P2325 | 95.2    | Detected | 80.7    | Detected | 110.1    | Detected | 122.9    | Detected   | Cers3         | 1.290966387 | 1.15651261 | 1.52292441 | 1.3643123 |
| A_51_P2702 | 1075.6  | Detected | 975.3   | Detected | 1065.8   | Detected | 1388.4   | Detected   | Dync1li1      | 1.290814429 | 0.99088881 | 1.42356198 | 1.092792  |
| A_55_P2173 | 12935.6 | Detected | 8714.5  | Detected | 17393.3  | Detected | 16696.3  | Detected   | Ctdspl        | 1.290724821 | 1.34460713 | 1.91592174 | 1.9959034 |
| A_65_P0782 | 289.3   | Detected | 349     | Detected | 261.2    | Detected | 373.4    | Detected   | Gm2701        | 1.290701694 | 0.90286899 | 1.06991404 | 0.7484241 |
| A_55_P2094 | 633.3   | Detected | 830.5   | Detected | 472.5    | Detected | 817.4    | Detected   | Scgb2b15      | 1.290699511 | 0.7460919  | 0.98422637 | 0.5689344 |
| A_55_P2004 | 60.2    | Detected | 105.9   | Detected | 46.4     | Detected | 77.7     | Detected   | Klra6         | 1.290697674 | 0.77076412 | 0.73371105 | 0.4381492 |
| A_51_P3670 | 38408.7 | Detected | 50650.4 | Detected | 39156.5  | Detected | 49568.1  | Detected   | Ifrd1         | 1.290543549 | 1.01946955 | 0.97863196 | 0.7730739 |
| A_55_P2054 | 9158.6  | Detected | 9364.6  | Detected | 12832    | Detected | 11819.5  | Detected   | Alg8          | 1.290535671 | 1.4010875  | 1.26214681 | 1.3702667 |
| A_55_P1961 | 5027.6  | Detected | 6070.4  | Detected | 6646.1   | Detected | 6488.1   | Detected   | Mettl3        | 1.29049646  | 1.32192299 | 1.0688093  | 1.0948372 |

|            |          |            |          |          |          |            |          |            |               |             |            |            |           |
|------------|----------|------------|----------|----------|----------|------------|----------|------------|---------------|-------------|------------|------------|-----------|
| A_55_P2168 | 7060.3   | Detected   | 8199.4   | Detected | 5654.4   | Detected   | 9110.6   | Detected   | Slc46a1       | 1.290398425 | 0.80087248 | 1.11113008 | 0.6896114 |
| A_66_P1168 | 16448.3  | Detected   | 21158.3  | Detected | 18654.8  | Detected   | 21224.6  | Detected   | Selt          | 1.290382593 | 1.1341476  | 1.00313352 | 0.8816776 |
| A_55_P1954 | 6045.6   | Detected   | 5475     | Detected | 7362.4   | Detected   | 7800.8   | Detected   | Btbd10        | 1.290326849 | 1.2178113  | 1.42480365 | 1.3447306 |
| A_51_P1464 | 1285.8   | Detected   | 1409.7   | Detected | 1344.5   | Detected   | 1659.1   | Detected   | Fam104a       | 1.290325089 | 1.04565251 | 1.17691707 | 0.953749  |
| A_51_P5084 | 26.2     | Detected   | 17.4     | Detected | 17.8     | Detected   | 33.8     | Not Detect | Olf103        | 1.290076336 | 0.67938931 | 1.94252874 | 1.0229885 |
| A_55_P2272 | 1053.4   | Detected   | 889.4    | Detected | 1094.7   | Detected   | 1358.9   | Detected   | Lrrfip2       | 1.29001329  | 1.03920638 | 1.52788397 | 1.2308298 |
| A_66_P1235 | 382.1    | Detected   | 344.2    | Detected | 347      | Detected   | 492.9    | Detected   | Mog           | 1.289976446 | 0.90813923 | 1.43201627 | 1.0081348 |
| A_55_P2146 | 639.7    | Detected   | 825.3    | Detected | 746.6    | Detected   | 825.1    | Detected   | Slc2a12       | 1.289823355 | 1.16710958 | 0.99975766 | 0.9046407 |
| A_55_P2019 | 2007     | Detected   | 2477.7   | Detected | 1834.5   | Detected   | 2588.6   | Detected   | Tmem120b      | 1.28978575  | 0.91405082 | 1.04475925 | 0.7404044 |
| A_55_P2348 | 81.1     | Detected   | 91.4     | Detected | 71.7     | Detected   | 104.6    | Detected   | 1500032F14Rik | 1.289765721 | 0.88409371 | 1.14442013 | 0.7844639 |
| A_55_P2034 | 2122.6   | Detected   | 3690.8   | Detected | 2026.5   | Detected   | 2737.6   | Detected   | Terf2         | 1.289738999 | 0.95472534 | 0.74173621 | 0.549068  |
| A_52_P4048 | 488.5    | Detected   | 388      | Detected | 817.3    | Detected   | 630      | Detected   | Tmem62        | 1.289662231 | 1.67308086 | 1.62371134 | 2.1064433 |
| A_55_P2054 | 21849.9  | Detected   | 25299.3  | Detected | 20206    | Detected   | 28176.2  | Detected   | Trappc1       | 1.289534506 | 0.92476396 | 1.11371461 | 0.7986782 |
| A_55_P1965 | 114713.3 | Detected   | 119767.5 | Detected | 148440.5 | Detected   | 147922.5 | Detected   | Uqcrq         | 1.289497382 | 1.29401299 | 1.23508047 | 1.2394055 |
| A_55_P2162 | 7.6      | Not Detect | 18.5     | Detected | 10.3     | Not Detect | 9.8      | Not Detect | Rtn1          | 1.289473684 | 1.35526316 | 0.52972973 | 0.5567568 |
| A_52_P1959 | 39055.7  | Detected   | 52002.7  | Detected | 36970.4  | Detected   | 50358.4  | Detected   | Exosc6        | 1.289399499 | 0.94660703 | 0.96838049 | 0.7109323 |
| A_55_P2133 | 464.6    | Detected   | 582.2    | Detected | 615.6    | Detected   | 599      | Detected   | Tgds          | 1.289281102 | 1.32501076 | 1.02885606 | 1.0573686 |
| A_52_P5896 | 386.5    | Detected   | 377.8    | Detected | 378.8    | Detected   | 498.3    | Detected   | Zfp846        | 1.289262613 | 0.98007762 | 1.31895183 | 1.0026469 |
| A_55_P2004 | 262.8    | Detected   | 251.8    | Detected | 317.2    | Detected   | 338.8    | Detected   | Gm10353       | 1.289193303 | 1.20700152 | 1.34551231 | 1.2597299 |
| A_52_P1373 | 50.5     | Detected   | 29.1     | Detected | 42.3     | Detected   | 65.1     | Detected   | Slc35d1       | 1.289108911 | 0.83762376 | 2.2371134  | 1.4536082 |
| A_51_P2822 | 2312.5   | Detected   | 3180.9   | Detected | 2030.8   | Detected   | 2981     | Detected   | Snopc1        | 1.289081081 | 0.87818378 | 0.93715615 | 0.6384357 |
| A_55_P1995 | 115.9    | Detected   | 119.4    | Detected | 99.2     | Detected   | 149.4    | Detected   | Btnl2         | 1.289042278 | 0.85591027 | 1.25125628 | 0.8308208 |
| A_55_P2144 | 5705.1   | Detected   | 8089.6   | Detected | 6586.8   | Detected   | 7353.9   | Detected   | LOC101055971  | 1.289004575 | 1.15454593 | 0.90905607 | 0.8142306 |
| A_52_P4044 | 4320     | Detected   | 3357.4   | Detected | 4782.2   | Detected   | 5568.2   | Detected   | Tmem60        | 1.288935185 | 1.10699074 | 1.65848573 | 1.424376  |
| A_55_P2096 | 54       | Detected   | 57.6     | Detected | 40.8     | Detected   | 69.6     | Detected   | Zfp11         | 1.288888889 | 0.75555556 | 1.20833333 | 0.7083333 |
| A_55_P2001 | 1139.6   | Detected   | 867      | Detected | 708.1    | Detected   | 1468.8   | Detected   | 6330408A02Rik | 1.288873289 | 0.62135837 | 1.69411765 | 0.8167243 |
| A_55_P1978 | 104.9    | Detected   | 143.6    | Detected | 120.8    | Detected   | 135.2    | Detected   | H2-Q5         | 1.28884652  | 1.15157293 | 0.94150418 | 0.8412256 |
| A_52_P4016 | 6103.9   | Detected   | 8101.4   | Detected | 5708.7   | Detected   | 7866.6   | Detected   | Bpgm          | 1.288782582 | 0.93525451 | 0.97101736 | 0.704656  |
| A_55_P2008 | 5051.3   | Detected   | 4913.8   | Detected | 4727.1   | Detected   | 6509.9   | Detected   | Cltc          | 1.28875735  | 0.9358185  | 1.32481989 | 0.962005  |
| A_51_P5079 | 927.7    | Detected   | 1488.4   | Detected | 958.7    | Detected   | 1195.5   | Detected   | Brf2          | 1.288670907 | 1.03341597 | 0.8032115  | 0.6441145 |
| A_55_P2084 | 44.7     | Detected   | 45.7     | Detected | 53       | Detected   | 57.6     | Detected   | Hist1h2al     | 1.288590604 | 1.18568233 | 1.26039387 | 1.1597374 |
| A_55_P2066 | 189.2    | Detected   | 218.4    | Detected | 235.5    | Detected   | 243.8    | Detected   | Galt          | 1.28858351  | 1.24471459 | 1.11630037 | 1.0782967 |
| A_66_P1057 | 4236.8   | Detected   | 3178.6   | Detected | 2680.3   | Detected   | 5459.4   | Detected   | Net1          | 1.288566843 | 0.63262368 | 1.71754861 | 0.8432329 |
| A_51_P3161 | 81.8     | Detected   | 74.4     | Detected | 74.7     | Detected   | 105.4    | Detected   | Vmn1r192      | 1.288508557 | 0.91320293 | 1.41666667 | 1.0040323 |
| A_55_P1993 | 821.3    | Detected   | 755.8    | Detected | 789.8    | Detected   | 1058.2   | Detected   | Gm2824        | 1.288445148 | 0.96164617 | 1.40010585 | 1.0449854 |
| A_52_P3763 | 876.3    | Detected   | 813.5    | Detected | 1156.5   | Detected   | 1129     | Detected   | Acn9          | 1.288371562 | 1.31975351 | 1.38783036 | 1.4216349 |
| A_51_P1620 | 9023.6   | Detected   | 10631.2  | Detected | 9871.6   | Detected   | 11625.5  | Detected   | Ndufaf4       | 1.288343898 | 1.0939758  | 1.0935266  | 0.9285499 |
| A_66_P1169 | 11.1     | Not Detect | 24.6     | Detected | 7.8      | Not Detect | 14.3     | Not Detect | Tro           | 1.288288288 | 0.7027027  | 0.58130081 | 0.3170732 |
| A_55_P2161 | 107.2    | Detected   | 127.7    | Detected | 107.4    | Detected   | 138.1    | Detected   | Arr3          | 1.288246269 | 1.00186567 | 1.08144088 | 0.8410337 |
| A_51_P1587 | 48996.2  | Detected   | 53369.6  | Detected | 61351.9  | Detected   | 63117.2  | Detected   | Elof1         | 1.288206024 | 1.2521767  | 1.1826433  | 1.1495664 |

|            |          |          |         |          |          |          |          |            |               |             |            |            |           |
|------------|----------|----------|---------|----------|----------|----------|----------|------------|---------------|-------------|------------|------------|-----------|
| A_51_P2618 | 180.8    | Detected | 180.7   | Detected | 171.1    | Detected | 232.9    | Detected   | Tmem8c        | 1.288163717 | 0.94634956 | 1.28887659 | 0.9468733 |
| A_55_P2186 | 28621.9  | Detected | 29944.3 | Detected | 26833.4  | Detected | 36869.1  | Detected   | Lypla2        | 1.288142995 | 0.93751288 | 1.23125603 | 0.8961104 |
| A_65_P1181 | 17.7     | Detected | 21.3    | Detected | 21.9     | Detected | 22.8     | Not Detect | Cnot2         | 1.288135593 | 1.23728814 | 1.07042254 | 1.028169  |
| A_55_P2402 | 510.6    | Detected | 435.7   | Detected | 315.4    | Detected | 657.6    | Detected   | 9130020K20Rik | 1.287896592 | 0.61770466 | 1.50929539 | 0.7238926 |
| A_55_P2144 | 407.1    | Detected | 805.3   | Detected | 358.3    | Detected | 524.3    | Detected   | Ccdc90b       | 1.287889953 | 0.88012773 | 0.65106172 | 0.4449274 |
| A_51_P4937 | 6394.1   | Detected | 7468.6  | Detected | 9053.9   | Detected | 8234.8   | Detected   | Tfam          | 1.28787476  | 1.41597723 | 1.10258951 | 1.212262  |
| A_55_P1956 | 8313.7   | Detected | 7266.2  | Detected | 8974.2   | Detected | 10706    | Detected   | Cyfp1         | 1.287753948 | 1.07944718 | 1.47339737 | 1.235061  |
| A_51_P4808 | 14434.2  | Detected | 17479.3 | Detected | 13510.4  | Detected | 18586.1  | Detected   | Thap11        | 1.287643236 | 0.93599922 | 1.06332061 | 0.7729371 |
| A_55_P2117 | 120.3    | Detected | 122.4   | Detected | 121.8    | Detected | 154.9    | Detected   | 5830415F09Rik | 1.287614298 | 1.01246883 | 1.26552288 | 0.995098  |
| A_55_P2131 | 424.2    | Detected | 169.7   | Detected | 302      | Detected | 546.2    | Detected   | Mical2        | 1.287600189 | 0.71192834 | 3.2186211  | 1.7796111 |
| A_51_P1569 | 13611.4  | Detected | 22025.9 | Detected | 13999.3  | Detected | 17525.8  | Detected   | Dnajc15       | 1.287582468 | 1.02849817 | 0.79569053 | 0.6355836 |
| A_55_P2100 | 111      | Detected | 121.8   | Detected | 101.2    | Detected | 142.9    | Detected   | Sprtn         | 1.287387387 | 0.91171171 | 1.17323481 | 0.8308703 |
| A_55_P2031 | 137.1    | Detected | 239.6   | Detected | 68.6     | Detected | 176.5    | Detected   | Gpr85         | 1.287381473 | 0.5003647  | 0.73664441 | 0.2863105 |
| A_51_P2195 | 146.5    | Detected | 108.2   | Detected | 90.2     | Detected | 188.6    | Detected   | Slc41a2       | 1.287372014 | 0.61569966 | 1.74306839 | 0.8336414 |
| A_55_P2171 | 36.2     | Detected | 32.2    | Detected | 31.1     | Detected | 46.6     | Not Detect | Vsig10l       | 1.287292818 | 0.85911602 | 1.44720497 | 0.9658385 |
| A_52_P3138 | 1002.3   | Detected | 1198.1  | Detected | 1715.8   | Detected | 1290.1   | Detected   | Slc25a26      | 1.287139579 | 1.71186272 | 1.07678825 | 1.4321008 |
| A_55_P2195 | 108.7    | Detected | 94.1    | Detected | 94.1     | Detected | 139.9    | Detected   | 1700016K05Rik | 1.287028519 | 0.86568537 | 1.48671626 | 1         |
| A_66_P1239 | 511.2    | Detected | 586.1   | Detected | 526.6    | Detected | 657.8    | Detected   | Ikzf5         | 1.286776213 | 1.0301252  | 1.12233407 | 0.8984815 |
| A_51_P2033 | 27.2     | Detected | 25.6    | Detected | 28.9     | Detected | 35       | Not Detect | Vmn1r216      | 1.286764706 | 1.0625     | 1.3671875  | 1.1289063 |
| A_51_P1859 | 97.3     | Detected | 94.9    | Detected | 98.4     | Detected | 125.2    | Detected   | Gper1         | 1.286742035 | 1.01130524 | 1.31928346 | 1.0368809 |
| A_66_P1232 | 43.6     | Detected | 38.2    | Detected | 37.5     | Detected | 56.1     | Detected   | Vmn1r56       | 1.286697248 | 0.86009174 | 1.46858639 | 0.9816754 |
| A_55_P2147 | 220379.7 | Detected | 296029  | Detected | 236376.5 | Detected | 283557.8 | Detected   | Gm4883        | 1.286678401 | 1.07258745 | 0.9578717  | 0.798491  |
| A_55_P1973 | 237.2    | Detected | 273     | Detected | 243.9    | Detected | 305.2    | Detected   | Ddhd2         | 1.286677909 | 1.02824621 | 1.11794872 | 0.8934066 |
| A_55_P2172 | 62.1     | Detected | 53      | Detected | 56.3     | Detected | 79.9     | Detected   | Mxd4          | 1.286634461 | 0.90660225 | 1.50754717 | 1.0622642 |
| A_51_P2264 | 9574.2   | Detected | 10176.9 | Detected | 9758.1   | Detected | 12317.4  | Detected   | Rraga         | 1.286520023 | 1.01920787 | 1.21032928 | 0.958848  |
| A_55_P2012 | 2736.3   | Detected | 3100.5  | Detected | 2636.2   | Detected | 3520.2   | Detected   | Eea1          | 1.286481745 | 0.96341775 | 1.13536526 | 0.85025   |
| A_55_P1979 | 26509.3  | Detected | 25105.4 | Detected | 30426    | Detected | 34103.7  | Detected   | Morf4l1       | 1.286480594 | 1.14774815 | 1.3584209  | 1.2119305 |
| A_51_P4408 | 5821.8   | Detected | 7409.4  | Detected | 5456.3   | Detected | 7489     | Detected   | Dph2          | 1.286371912 | 0.93721873 | 1.01074311 | 0.7364024 |
| A_55_P2036 | 244.1    | Detected | 213.7   | Detected | 212.3    | Detected | 314      | Detected   | Gm13547       | 1.28635805  | 0.86972552 | 1.46934956 | 0.9934488 |
| A_55_P2079 | 51       | Detected | 47.3    | Detected | 46.6     | Detected | 65.6     | Detected   | Cacna1i       | 1.28627451  | 0.91372549 | 1.38689218 | 0.9852008 |
| A_55_P2009 | 21324.9  | Detected | 34071.9 | Detected | 20827.6  | Detected | 27429.6  | Detected   | Tom20         | 1.286270979 | 0.97667984 | 0.8050505  | 0.6112838 |
| A_55_P2159 | 1270     | Detected | 941.2   | Detected | 1380.1   | Detected | 1633.5   | Detected   | Ap5s1         | 1.286220472 | 1.08669291 | 1.73555036 | 1.4663196 |
| A_55_P2121 | 387.3    | Detected | 425.6   | Detected | 319.9    | Detected | 498.1    | Detected   | Ncor1         | 1.28608314  | 0.8259747  | 1.17034774 | 0.7516447 |
| A_55_P1995 | 979.3    | Detected | 885.4   | Detected | 907.7    | Detected | 1259.4   | Detected   | Zc3hav1       | 1.286020627 | 0.92688655 | 1.42240795 | 1.0251864 |
| A_55_P2012 | 47.9     | Detected | 35      | Detected | 42.1     | Detected | 61.6     | Detected   | Gm10847       | 1.286012526 | 0.87891441 | 1.76       | 1.2028571 |
| A_51_P1899 | 41993.8  | Detected | 50273.7 | Detected | 52034.8  | Detected | 53996    | Detected   | Dad1          | 1.285808857 | 1.23910673 | 1.0740407  | 1.0350302 |
| A_51_P5191 | 13065.1  | Detected | 15769.4 | Detected | 14707.4  | Detected | 16799.1  | Detected   | Eif3i         | 1.285799573 | 1.1257013  | 1.06529735 | 0.9326544 |
| A_55_P2083 | 610.5    | Detected | 693.5   | Detected | 643.3    | Detected | 784.9    | Detected   | Scfd1         | 1.285667486 | 1.05372645 | 1.13179524 | 0.9276136 |
| A_52_P1942 | 2197.8   | Detected | 1948.7  | Detected | 2062     | Detected | 2825.6   | Detected   | Sel1l         | 1.285649286 | 0.93821094 | 1.4499923  | 1.0581413 |
| A_55_P2118 | 25518.9  | Detected | 33188.7 | Detected | 27264.8  | Detected | 32806.3  | Detected   | Tnfp1         | 1.285568735 | 1.06841596 | 0.98847801 | 0.8215085 |

|            |          |            |          |            |         |            |          |            |               |             |            |            |           |
|------------|----------|------------|----------|------------|---------|------------|----------|------------|---------------|-------------|------------|------------|-----------|
| A_55_P2080 | 5595.4   | Detected   | 7377.2   | Detected   | 6325.3  | Detected   | 7193.1   | Detected   | Qdpr          | 1.285538121 | 1.13044644 | 0.97504473 | 0.857412  |
| A_55_P1952 | 204.9    | Detected   | 192.1    | Detected   | 232.3   | Detected   | 263.4    | Detected   | Gm833         | 1.285505124 | 1.13372377 | 1.37116085 | 1.209266  |
| A_51_P4879 | 21511.9  | Detected   | 27279.7  | Detected   | 18446.7 | Detected   | 27652.8  | Detected   | Psmid7        | 1.285465254 | 0.85751142 | 1.01367684 | 0.6762061 |
| A_51_P4247 | 15360.9  | Detected   | 18526.1  | Detected   | 17534.5 | Detected   | 19744    | Detected   | 0610009D07Rik | 1.285341354 | 1.14150213 | 1.06573969 | 0.9464755 |
| A_55_P2069 | 84.5     | Detected   | 96.4     | Detected   | 90      | Detected   | 108.6    | Detected   | Fxyd2         | 1.285207101 | 1.06508876 | 1.12655602 | 0.93361   |
| A_55_P2324 | 175.7    | Detected   | 312.8    | Detected   | 203.8   | Detected   | 225.8    | Detected   | 6230400D17Rik | 1.285145134 | 1.1599317  | 0.72186701 | 0.6515345 |
| A_55_P2128 | 2928.4   | Detected   | 2997.4   | Detected   | 2098.5  | Detected   | 3763.4   | Detected   | Ikbip         | 1.285138642 | 0.71660292 | 1.25555481 | 0.7001068 |
| A_51_P1437 | 5152.9   | Detected   | 5498.9   | Detected   | 5396.1  | Detected   | 6621.6   | Detected   | Vipas39       | 1.285023967 | 1.04719672 | 1.20416811 | 0.9813054 |
| A_51_P4025 | 7037.6   | Detected   | 5440.4   | Detected   | 6617.8  | Detected   | 9042.9   | Detected   | Uvrag         | 1.284940889 | 0.94034898 | 1.66217558 | 1.2164179 |
| A_55_P2091 | 654.2    | Detected   | 595.8    | Detected   | 596.1   | Detected   | 840.6    | Detected   | 2610318M16Rik | 1.284928157 | 0.91118924 | 1.41087613 | 1.0005035 |
| A_55_P2131 | 3159.4   | Detected   | 2767     | Detected   | 3836.7  | Detected   | 4058.9   | Detected   | Mettl10       | 1.284705957 | 1.21437615 | 1.46689555 | 1.386592  |
| A_51_P1762 | 617      | Detected   | 644.7    | Detected   | 533.8   | Detected   | 792.6    | Detected   | Trip11        | 1.284602917 | 0.86515397 | 1.22940903 | 0.827982  |
| A_52_P2547 | 51034.3  | Detected   | 56858.4  | Detected   | 63499.7 | Detected   | 65557.4  | Detected   | Ndufc1        | 1.284575276 | 1.24425533 | 1.1529941  | 1.1168042 |
| A_51_P3173 | 522.2    | Detected   | 386.4    | Detected   | 506.9   | Detected   | 670.8    | Detected   | Pddc1         | 1.284565301 | 0.97070088 | 1.73602484 | 1.311853  |
| A_51_P2850 | 168.7    | Detected   | 182      | Detected   | 207.8   | Detected   | 216.7    | Detected   | Wdr38         | 1.284528749 | 1.23177238 | 1.19065934 | 1.1417582 |
| A_55_P2040 | 22.5     | Detected   | 26.3     | Detected   | 20.5    | Detected   | 28.9     | Not Detect | Gm11517       | 1.284444444 | 0.91111111 | 1.09885932 | 0.7794677 |
| A_55_P2324 | 820.7    | Detected   | 336.2    | Detected   | 906.5   | Detected   | 1054.1   | Detected   | 5033406O09Rik | 1.284391373 | 1.1045449  | 3.13533611 | 2.6963117 |
| A_55_P1981 | 17803.1  | Detected   | 18509.6  | Detected   | 18456.4 | Detected   | 22864.1  | Detected   | Phldb1        | 1.284276334 | 1.03669586 | 1.2352563  | 0.9971258 |
| A_55_P2107 | 99.2     | Detected   | 87.4     | Detected   | 114.9   | Detected   | 127.4    | Detected   | Rab5b         | 1.284274194 | 1.15826613 | 1.4576659  | 1.3146453 |
| A_51_P4631 | 392.4    | Detected   | 326.2    | Detected   | 643.1   | Detected   | 503.9    | Detected   | Tbc1d2b       | 1.284148828 | 1.63888889 | 1.54475782 | 1.9714899 |
| A_55_P1978 | 259.8    | Detected   | 308      | Detected   | 261.6   | Detected   | 333.6    | Detected   | Gbp10         | 1.284064665 | 1.00692841 | 1.08311688 | 0.8493506 |
| A_55_P1986 | 4381.3   | Detected   | 4438     | Detected   | 4079.1  | Detected   | 5624.9   | Detected   | Gne           | 1.283842695 | 0.93102504 | 1.26744029 | 0.9191302 |
| A_55_P2033 | 7.4      | Not Detect | 64.7     | Detected   | 5.7     | Not Detect | 9.5      | Not Detect | Nkain2        | 1.283783784 | 0.77027027 | 0.14683153 | 0.0880989 |
| A_51_P4422 | 2098.8   | Detected   | 4138.8   | Detected   | 809.4   | Detected   | 2694.4   | Detected   | Dnajc12       | 1.283781208 | 0.38564894 | 0.65100995 | 0.1955639 |
| A_55_P2222 | 129.7    | Detected   | 135.4    | Detected   | 123.4   | Detected   | 166.5    | Detected   | Erc1          | 1.283731689 | 0.95142637 | 1.22968981 | 0.9113737 |
| A_55_P2153 | 12582    | Detected   | 15541.6  | Detected   | 11478.2 | Detected   | 16150    | Detected   | Afg3l1        | 1.283579717 | 0.9122715  | 1.03914655 | 0.7385469 |
| A_52_P2189 | 286      | Detected   | 303.8    | Detected   | 403     | Detected   | 367.1    | Detected   | D3Erd751e     | 1.283566434 | 1.40909091 | 1.20836076 | 1.3265306 |
| A_51_P2714 | 1030.5   | Detected   | 1067.2   | Detected   | 1103.2  | Detected   | 1322.7   | Detected   | Lhfpl4        | 1.283551674 | 1.07054828 | 1.23941154 | 1.0337331 |
| A_52_P2812 | 3674.3   | Detected   | 3058.3   | Detected   | 3173.2  | Detected   | 4716.1   | Detected   | Kdm4a         | 1.283537    | 0.86362028 | 1.54206585 | 1.0375699 |
| A_51_P2539 | 12.7     | Not Detect | 10.6     | Not Detect | 20.8    | Detected   | 16.3     | Not Detect | Pcp4          | 1.283464567 | 1.63779528 | 1.53773585 | 1.9622642 |
| A_55_P1956 | 100036.1 | Detected   | 117945.1 | Detected   | 94105.1 | Detected   | 128388.9 | Detected   | LOC634339     | 1.283425683 | 0.9407114  | 1.08854798 | 0.7978721 |
| A_51_P1250 | 8892.4   | Detected   | 11428.6  | Detected   | 13932.2 | Detected   | 11412.7  | Detected   | Wdr74         | 1.283421798 | 1.56675363 | 0.99860875 | 1.2190645 |
| A_66_P1367 | 53680    | Detected   | 52396.7  | Detected   | 71405.3 | Detected   | 68888.7  | Detected   | Scpep1        | 1.283321535 | 1.33020306 | 1.31475265 | 1.3627824 |
| A_51_P4194 | 165.6    | Detected   | 146.3    | Detected   | 170     | Detected   | 212.5    | Detected   | Gnmt          | 1.28321256  | 1.02657005 | 1.45249487 | 1.1619959 |
| A_66_P1075 | 634.6    | Detected   | 755.2    | Detected   | 563.6   | Detected   | 814.3    | Detected   | Fam133b       | 1.283170501 | 0.8881185  | 1.07825742 | 0.7462924 |
| A_66_P1309 | 279.4    | Detected   | 295.7    | Detected   | 255.6   | Detected   | 358.5    | Detected   | Map3k13       | 1.283106657 | 0.91481747 | 1.21237741 | 0.8643896 |
| A_55_P2034 | 919.6    | Detected   | 926.9    | Detected   | 763.5   | Detected   | 1179.9   | Detected   | 2610028H24Rik | 1.283057851 | 0.83025228 | 1.27295285 | 0.8237135 |
| A_55_P1968 | 140.3    | Detected   | 157.7    | Detected   | 168.1   | Detected   | 180      | Detected   | Rbm25         | 1.282965075 | 1.19814683 | 1.14140774 | 1.065948  |
| A_55_P2127 | 2109.3   | Detected   | 2404.4   | Detected   | 2866.3  | Detected   | 2706.1   | Detected   | Mtmr2         | 1.282937467 | 1.35888683 | 1.12547829 | 1.1921061 |
| A_55_P2136 | 2234.5   | Detected   | 2278.4   | Detected   | 2508.3  | Detected   | 2866.7   | Detected   | Pkn2          | 1.282926829 | 1.12253301 | 1.25820751 | 1.1009041 |



|            |                   |                   |                   |                  |               |             |            |            |           |
|------------|-------------------|-------------------|-------------------|------------------|---------------|-------------|------------|------------|-----------|
| A_55_P2032 | 20.5 Detected     | 26.1 Detected     | 18.9 Detected     | 26.3 Not Detect  | Rnase13       | 1.282926829 | 0.92195122 | 1.00766284 | 0.7241379 |
| A_51_P4434 | 8432.1 Detected   | 9120.8 Detected   | 8261.7 Detected   | 10816.9 Detected | 5830417110Rik | 1.28282397  | 0.97979151 | 1.18595956 | 0.9058087 |
| A_55_P2054 | 4242.3 Detected   | 3982 Detected     | 5477.7 Detected   | 5442.1 Detected  | 2810408111Rik | 1.282818283 | 1.29120996 | 1.36667504 | 1.3756153 |
| A_55_P2028 | 13033.6 Detected  | 15807.3 Detected  | 18969.6 Detected  | 16718.7 Detected | Dnajs19       | 1.282738461 | 1.45543825 | 1.05765691 | 1.2000531 |
| A_51_P3578 | 1190.3 Detected   | 1133.3 Detected   | 1298.6 Detected   | 1526.8 Detected  | Fbxo46        | 1.28270184  | 1.09098547 | 1.34721609 | 1.1458572 |
| A_51_P2600 | 10737.6 Detected  | 14014.7 Detected  | 15887.3 Detected  | 13773 Detected   | Sar1b         | 1.282688869 | 1.47959507 | 0.98275382 | 1.1336168 |
| A_51_P1998 | 31874.6 Detected  | 37378.6 Detected  | 35782 Detected    | 40884.6 Detected | Pin1          | 1.282670214 | 1.12258664 | 1.09379699 | 0.9572857 |
| A_52_P2941 | 139.4 Detected    | 122.5 Detected    | 162.9 Detected    | 178.8 Detected   | D2hgdh        | 1.282639885 | 1.16857963 | 1.45959184 | 1.3297959 |
| A_65_P1086 | 8526.9 Detected   | 10352.9 Detected  | 9714.7 Detected   | 10936.7 Detected | Scfd1         | 1.2826115   | 1.13930033 | 1.05639    | 0.9383554 |
| A_51_P2916 | 136 Detected      | 120.2 Detected    | 123.3 Detected    | 174.4 Detected   | Hspb9         | 1.282352941 | 0.90661765 | 1.45091514 | 1.0257903 |
| A_55_P2067 | 340.1 Detected    | 204.3 Detected    | 436.1 Detected    | 436.1 Detected   | Mep1a         | 1.282269921 | 1.28226992 | 2.13460597 | 2.134606  |
| A_55_P1991 | 13289.4 Detected  | 10699.2 Detected  | 12645.5 Detected  | 17039.9 Detected | Atraid        | 1.282217406 | 0.95154785 | 1.59263309 | 1.1819108 |
| A_55_P1996 | 201785.5 Detected | 229605.2 Detected | 198984.5 Detected | 258713 Detected  | LOC100505283  | 1.282118884 | 0.98611892 | 1.12677326 | 0.8666376 |
| A_55_P2026 | 324 Detected      | 338.1 Detected    | 295.1 Detected    | 415.4 Detected   | Erc2          | 1.282098765 | 0.91080247 | 1.22863058 | 0.8728187 |
| A_55_P2052 | 4176 Detected     | 4765.5 Detected   | 5152.4 Detected   | 5353.9 Detected  | Pgap2         | 1.282064176 | 1.23381226 | 1.12347078 | 1.0811877 |
| A_55_P2052 | 468.7 Detected    | 490.9 Detected    | 649.7 Detected    | 600.9 Detected   | Tia1          | 1.282056753 | 1.38617453 | 1.22407822 | 1.3234875 |
| A_51_P3577 | 111.7 Detected    | 129 Detected      | 122.2 Detected    | 143.2 Detected   | Inhbe         | 1.282005372 | 1.09400179 | 1.11007752 | 0.9472868 |
| A_55_P2160 | 46271.6 Detected  | 55750.8 Detected  | 56391.7 Detected  | 59317.8 Detected | Atp5f1        | 1.281948323 | 1.21871083 | 1.06398114 | 1.0114958 |
| A_51_P2387 | 21181.1 Detected  | 26993.3 Detected  | 24075.4 Detected  | 27152 Detected   | Mcl1          | 1.281897541 | 1.13664541 | 1.00587924 | 0.8919028 |
| A_51_P3693 | 14.9 Detected     | 18.9 Detected     | 11.8 Not Detect   | 19.1 Not Detect  | Nox4          | 1.281879195 | 0.79194631 | 1.01058201 | 0.6243386 |
| A_55_P2090 | 37791.6 Detected  | 47949.2 Detected  | 48046.2 Detected  | 48442.4 Detected | Pop5          | 1.281829825 | 1.27134601 | 1.01028589 | 1.002023  |
| A_51_P1944 | 1324.3 Detected   | 1052.9 Detected   | 1464.6 Detected   | 1697.4 Detected  | 1110059G10Rik | 1.281733746 | 1.10594276 | 1.61211891 | 1.3910153 |
| A_55_P2141 | 28.4 Detected     | 31.9 Detected     | 38.2 Detected     | 36.4 Not Detect  | Efcab9        | 1.281690141 | 1.34507042 | 1.14106583 | 1.1974922 |
| A_55_P2111 | 1068.3 Detected   | 1625.9 Detected   | 1056.3 Detected   | 1369.2 Detected  | 3110009E18Rik | 1.281662454 | 0.9887672  | 0.84211821 | 0.649671  |
| A_55_P1959 | 2340.7 Detected   | 1501 Detected     | 3281.5 Detected   | 2999.7 Detected  | Rbm47         | 1.28153971  | 1.40193105 | 1.99846769 | 2.1862092 |
| A_55_P2140 | 1978.2 Detected   | 1694.1 Detected   | 2009.4 Detected   | 2535.1 Detected  | Slc25a51      | 1.281518552 | 1.01577191 | 1.49642878 | 1.1861165 |
| A_51_P1009 | 46.2 Detected     | 39.5 Detected     | 38.3 Detected     | 59.2 Detected    | Serpib3c      | 1.281385281 | 0.82900433 | 1.49873418 | 0.9696203 |
| A_51_P2453 | 1749.6 Detected   | 2045.5 Detected   | 2173.3 Detected   | 2241.9 Detected  | L3mbtl2       | 1.281378601 | 1.24216964 | 1.09601564 | 1.0624786 |
| A_55_P2096 | 10255.8 Detected  | 11644.4 Detected  | 13736.7 Detected  | 13141.2 Detected | Bcs1l         | 1.28134324  | 1.33940794 | 1.12854248 | 1.1796829 |
| A_66_P1223 | 23048.9 Detected  | 18085.5 Detected  | 25121.8 Detected  | 29532.7 Detected | Aldh16a1      | 1.281306266 | 1.08993488 | 1.63294905 | 1.3890575 |
| A_51_P3508 | 45.2 Detected     | 402.4 Detected    | 35.5 Detected     | 57.9 Detected    | Cnn1          | 1.280973451 | 0.78539823 | 0.14388668 | 0.0882207 |
| A_55_P2059 | 261.7 Detected    | 207.9 Detected    | 307.5 Detected    | 335.2 Detected   | Nav1          | 1.280855942 | 1.17500955 | 1.61231361 | 1.4790765 |
| A_51_P2666 | 2345.6 Detected   | 4959.2 Detected   | 2158.3 Detected   | 3004.2 Detected  | Nob1          | 1.280781037 | 0.92014836 | 0.60578319 | 0.4352113 |
| A_55_P2094 | 141.4 Detected    | 145.7 Detected    | 132.6 Detected    | 181.1 Detected   | Atp1a3        | 1.280763791 | 0.93776521 | 1.242965   | 0.9100892 |
| A_55_P2030 | 1684.4 Detected   | 2046.3 Detected   | 1385.6 Detected   | 2157.3 Detected  | Trem1         | 1.28075279  | 0.82260746 | 1.05424425 | 0.6771246 |
| A_52_P2650 | 952.7 Detected    | 1036.3 Detected   | 975.3 Detected    | 1220.1 Detected  | Pik3ca        | 1.280675974 | 1.02372205 | 1.17736177 | 0.9411367 |
| A_55_P1963 | 2809.9 Detected   | 3611.6 Detected   | 2656.6 Detected   | 3598.3 Detected  | Npr2          | 1.28057938  | 0.9454429  | 0.99631742 | 0.7355743 |
| A_55_P2164 | 41864.6 Detected  | 49288.9 Detected  | 59526.3 Detected  | 53610.8 Detected | LOC546711     | 1.280575952 | 1.42187672 | 1.08768506 | 1.2077019 |
| A_51_P4303 | 5475.4 Detected   | 3879.4 Detected   | 6527.1 Detected   | 7011.4 Detected  | Dnajs30       | 1.28052745  | 1.19207729 | 1.80734134 | 1.6825024 |
| A_51_P1596 | 24556.3 Detected  | 19901 Detected    | 26781.7 Detected  | 31440.5 Detected | Snx1          | 1.280343537 | 1.0906244  | 1.57984523 | 1.3457464 |

|            |         |            |         |            |         |            |         |            |               |             |            |            |           |
|------------|---------|------------|---------|------------|---------|------------|---------|------------|---------------|-------------|------------|------------|-----------|
| A_55_P2098 | 826.5   | Detected   | 768.2   | Detected   | 958.8   | Detected   | 1058.2  | Detected   | Tubd1         | 1.280338778 | 1.1600726  | 1.37750586 | 1.2481125 |
| A_55_P1961 | 7911.6  | Detected   | 6019.9  | Detected   | 7492    | Detected   | 10129.4 | Detected   | Tctex1d2      | 1.280322564 | 0.94696395 | 1.68265254 | 1.2445389 |
| A_55_P2021 | 6031.6  | Detected   | 5860.9  | Detected   | 7079.5  | Detected   | 7722.3  | Detected   | Fkbp1a        | 1.28030705  | 1.173735   | 1.31759627 | 1.2079203 |
| A_55_P1971 | 62.8    | Detected   | 91.5    | Detected   | 47.9    | Detected   | 80.4    | Detected   | Kctd11        | 1.280254777 | 0.76273885 | 0.87868852 | 0.5234973 |
| A_66_P1396 | 43.9    | Detected   | 37.6    | Detected   | 36.8    | Detected   | 56.2    | Detected   | Stfa2         | 1.280182232 | 0.83826879 | 1.49468085 | 0.9787234 |
| A_52_P4389 | 48.9    | Detected   | 54.8    | Detected   | 55.3    | Detected   | 62.6    | Detected   | Olfir524      | 1.280163599 | 1.13087935 | 1.14233577 | 1.0091241 |
| A_55_P2062 | 12968.5 | Detected   | 9544    | Detected   | 19390.9 | Detected   | 16600.9 | Detected   | Tmem41a       | 1.280094074 | 1.49523075 | 1.73940696 | 2.0317372 |
| A_52_P6760 | 8853.2  | Detected   | 8929.2  | Detected   | 11010.8 | Detected   | 11332.9 | Detected   | Rbx1          | 1.280090815 | 1.24370849 | 1.26919545 | 1.2331228 |
| A_52_P3945 | 7619.3  | Detected   | 7910.2  | Detected   | 8289    | Detected   | 9753.1  | Detected   | Tex2          | 1.280051973 | 1.08789521 | 1.23297767 | 1.0478875 |
| A_55_P2029 | 15      | Detected   | 22.7    | Detected   | 30.3    | Detected   | 19.2    | Not Detect | Sry           | 1.28        | 2.02       | 0.84581498 | 1.3348018 |
| A_51_P1503 | 7.5     | Not Detect | 34.3    | Detected   | 4.8     | Not Detect | 9.6     | Not Detect | Crtam         | 1.28        | 0.64       | 0.27988338 | 0.1399417 |
| A_55_P2027 | 18243.4 | Detected   | 17111   | Detected   | 24289.6 | Detected   | 23351.3 | Detected   | Ccdc101       | 1.279986187 | 1.33141849 | 1.36469523 | 1.4195313 |
| A_52_P5702 | 22602.1 | Detected   | 36452.3 | Detected   | 24212.3 | Detected   | 28929.6 | Detected   | Psmb10        | 1.279951863 | 1.07124117 | 0.79362893 | 0.6642187 |
| A_52_P1574 | 250.8   | Detected   | 464.8   | Detected   | 241.2   | Detected   | 321     | Detected   | Abhd1         | 1.279904306 | 0.96172249 | 0.69061962 | 0.5189329 |
| A_51_P3761 | 10391.1 | Detected   | 12676.9 | Detected   | 13294.2 | Detected   | 13299.6 | Detected   | N6amt2        | 1.279902994 | 1.27938332 | 1.04912084 | 1.0486949 |
| A_55_P2015 | 306.6   | Detected   | 282.9   | Detected   | 312.8   | Detected   | 392.4   | Detected   | Clps          | 1.279843444 | 1.02022179 | 1.38706257 | 1.1056911 |
| A_51_P2077 | 151.9   | Detected   | 269     | Detected   | 113.9   | Detected   | 194.4   | Detected   | Guca1a        | 1.279789335 | 0.74983542 | 0.72267658 | 0.4234201 |
| A_55_P1953 | 132.6   | Detected   | 119.7   | Detected   | 132.7   | Detected   | 169.7   | Detected   | Mob3c         | 1.279788839 | 1.00075415 | 1.41771094 | 1.1086048 |
| A_55_P2128 | 33.6    | Detected   | 32.2    | Detected   | 37.7    | Detected   | 43      | Not Detect | Gm10673       | 1.279761905 | 1.12202381 | 1.33540373 | 1.1708075 |
| A_51_P4918 | 233.9   | Detected   | 276.8   | Detected   | 277.5   | Detected   | 299.3   | Detected   | Taf1b         | 1.27960667  | 1.18640445 | 1.08128613 | 1.0025289 |
| A_55_P2166 | 5014.7  | Detected   | 5548.8  | Detected   | 5544.9  | Detected   | 6416.2  | Detected   | Ppcs          | 1.279478334 | 1.10572916 | 1.15632209 | 0.9992971 |
| A_55_P2110 | 3171.2  | Detected   | 2741.8  | Detected   | 2918.9  | Detected   | 4057.3  | Detected   | Slc35a2       | 1.279421039 | 0.92044021 | 1.4797943  | 1.0645926 |
| A_51_P3920 | 146.4   | Detected   | 16.2    | Detected   | 94.6    | Detected   | 187.3   | Detected   | Car8          | 1.279371585 | 0.64617486 | 11.5617284 | 5.8395062 |
| A_52_P6414 | 409.9   | Detected   | 454.7   | Detected   | 307.9   | Detected   | 524.4   | Detected   | Wars2         | 1.279336424 | 0.75115882 | 1.15328788 | 0.6771498 |
| A_55_P2174 | 413.6   | Detected   | 374.6   | Detected   | 362.5   | Detected   | 529.1   | Detected   | Cngb1         | 1.279255319 | 0.87645068 | 1.41243994 | 0.9676989 |
| A_55_P2051 | 38435.7 | Detected   | 36548.5 | Detected   | 38176.2 | Detected   | 49160   | Detected   | Scaf1         | 1.279019245 | 0.99324846 | 1.34506204 | 1.0445353 |
| A_52_P1003 | 176.1   | Detected   | 233.8   | Detected   | 204.4   | Detected   | 225.2   | Detected   | Asf1a         | 1.278818853 | 1.16070415 | 0.96321642 | 0.8742515 |
| A_55_P2070 | 281.6   | Detected   | 282.4   | Detected   | 322.3   | Detected   | 360.1   | Detected   | Tyw1          | 1.278764205 | 1.14453125 | 1.27514164 | 1.141289  |
| A_52_P2401 | 3684.6  | Detected   | 3366.2  | Detected   | 3629.5  | Detected   | 4711.7  | Detected   | Snx27         | 1.278754817 | 0.98504587 | 1.39970887 | 1.0782188 |
| A_52_P4573 | 216     | Detected   | 227.4   | Detected   | 261     | Detected   | 276.2   | Detected   | Trim35        | 1.278703704 | 1.20833333 | 1.21459982 | 1.1477573 |
| A_55_P1978 | 54.9    | Detected   | 45.5    | Detected   | 56.1    | Detected   | 70.2    | Detected   | Zfp606        | 1.278688525 | 1.02185792 | 1.54285714 | 1.232967  |
| A_51_P2800 | 9858.8  | Detected   | 11966.5 | Detected   | 7958.3  | Detected   | 12606.3 | Detected   | Zfp655        | 1.278685033 | 0.80722806 | 1.05346593 | 0.6650483 |
| A_55_P2026 | 48.1    | Detected   | 62      | Detected   | 50      | Detected   | 61.5    | Detected   | 9230111E07Rik | 1.278586279 | 1.03950104 | 0.99193548 | 0.8064516 |
| A_55_P2166 | 13252.7 | Detected   | 11284.8 | Detected   | 14516.5 | Detected   | 16944.4 | Detected   | Mrps36        | 1.278562104 | 1.0953617  | 1.50152417 | 1.2863764 |
| A_52_P4097 | 800     | Detected   | 805.6   | Detected   | 839     | Detected   | 1022.8  | Detected   | Sec24a        | 1.2785      | 1.04875    | 1.26961271 | 1.0414598 |
| A_51_P5201 | 1923    | Detected   | 1958.7  | Detected   | 1938.5  | Detected   | 2458.5  | Detected   | Adprhl2       | 1.278471139 | 1.00806032 | 1.25516924 | 0.989687  |
| A_55_P2150 | 18175.9 | Detected   | 18771.1 | Detected   | 16661.9 | Detected   | 23237.3 | Detected   | Lhfpl4        | 1.278467641 | 0.91670289 | 1.23792958 | 0.8876358 |
| A_66_P1341 | 17.6    | Detected   | 14      | Not Detect | 20.4    | Detected   | 22.5    | Not Detect | B020031H02Rik | 1.278409091 | 1.15909091 | 1.60714286 | 1.4571429 |
| A_55_P2022 | 168.1   | Detected   | 177.9   | Detected   | 159.9   | Detected   | 214.9   | Detected   | 1700027J07Rik | 1.278405711 | 0.95121951 | 1.20798201 | 0.8988196 |
| A_55_P2059 | 1209.6  | Detected   | 1307.5  | Detected   | 937.7   | Detected   | 1546.3  | Detected   | Gm9920        | 1.278356481 | 0.77521495 | 1.18263862 | 0.7171702 |

|            |          |            |          |            |          |            |         |            |               |             |            |            |           |
|------------|----------|------------|----------|------------|----------|------------|---------|------------|---------------|-------------|------------|------------|-----------|
| A_55_P2100 | 31940.4  | Detected   | 51645.9  | Detected   | 32841.6  | Detected   | 40828.8 | Detected   | Lsm6          | 1.278280798 | 1.02821505 | 0.79055259 | 0.6358995 |
| A_55_P2035 | 118641.5 | Detected   | 161601.4 | Detected   | 132716.5 | Detected   | 151654  | Detected   | Oaz1          | 1.278254237 | 1.11863471 | 0.93844484 | 0.8212584 |
| A_52_P5787 | 114.3    | Detected   | 110.5    | Detected   | 104.8    | Detected   | 146.1   | Detected   | Dok3          | 1.278215223 | 0.91688539 | 1.32217195 | 0.9484163 |
| A_55_P2017 | 63641.6  | Detected   | 71850.5  | Detected   | 93172.5  | Detected   | 81347.1 | Detected   | LOC636901     | 1.278206393 | 1.46401882 | 1.13217166 | 1.2967551 |
| A_51_P3242 | 9203.2   | Detected   | 8343.3   | Detected   | 11667.8  | Detected   | 11763.5 | Detected   | Kif23         | 1.278196714 | 1.26779816 | 1.40993372 | 1.3984634 |
| A_66_P1095 | 5688.2   | Detected   | 5442     | Detected   | 8367.6   | Detected   | 7269.5  | Detected   | Plcb3         | 1.277996554 | 1.47104532 | 1.33581404 | 1.5375965 |
| A_55_P2156 | 25854    | Detected   | 21499.9  | Detected   | 25567.5  | Detected   | 33041   | Detected   | Stx4a         | 1.277984064 | 0.98891854 | 1.53679785 | 1.1891916 |
| A_51_P4435 | 48552.6  | Detected   | 72029.4  | Detected   | 56872.1  | Detected   | 62048.8 | Detected   | Ppa1          | 1.277970696 | 1.17135025 | 0.86143714 | 0.7895679 |
| A_55_P2062 | 86       | Detected   | 83.6     | Detected   | 83.4     | Detected   | 109.9   | Detected   | B630005N14Rik | 1.277906977 | 0.96976744 | 1.3145933  | 0.9976077 |
| A_55_P2075 | 128.5    | Detected   | 156.1    | Detected   | 145.8    | Detected   | 164.2   | Detected   | Fat2          | 1.277821012 | 1.13463035 | 1.05188981 | 0.9340167 |
| A_55_P2155 | 17750    | Detected   | 15353.6  | Detected   | 20634.1  | Detected   | 22679.8 | Detected   | Chmp3         | 1.277735211 | 1.16248451 | 1.47716496 | 1.3439259 |
| A_55_P1955 | 1492.1   | Detected   | 2027.2   | Detected   | 1912.3   | Detected   | 1906.5  | Detected   | Slc18b1       | 1.277729375 | 1.28161651 | 0.94045975 | 0.9433208 |
| A_51_P2593 | 549.5    | Detected   | 454.1    | Detected   | 489.9    | Detected   | 702.1   | Detected   | Fbrs          | 1.277707006 | 0.89153776 | 1.54613521 | 1.0788373 |
| A_55_P2056 | 334.4    | Detected   | 362.3    | Detected   | 340.4    | Detected   | 427.2   | Detected   | Kif24         | 1.277511962 | 1.01794258 | 1.17913331 | 0.9395529 |
| A_51_P3702 | 6877.6   | Detected   | 7371.4   | Detected   | 7634     | Detected   | 8785.8  | Detected   | Med24         | 1.277451437 | 1.10998023 | 1.19187671 | 1.0356242 |
| A_55_P1969 | 29360.9  | Detected   | 18166.2  | Detected   | 27136.5  | Detected   | 37505.8 | Detected   | Pitpnm1       | 1.277406347 | 0.92423938 | 2.06459248 | 1.4937907 |
| A_51_P4396 | 3204.7   | Detected   | 3111.8   | Detected   | 2945.7   | Detected   | 4093.7  | Detected   | Dnajb2        | 1.277405061 | 0.9191812  | 1.31554084 | 0.9466225 |
| A_51_P2736 | 2911.2   | Detected   | 2200.6   | Detected   | 2760.1   | Detected   | 3718.6  | Detected   | Gbe1          | 1.277342677 | 0.948097   | 1.68981187 | 1.2542488 |
| A_55_P2007 | 9145.2   | Detected   | 14857.5  | Detected   | 9648.7   | Detected   | 11680.1 | Detected   | Cd97          | 1.277183659 | 1.0550562  | 0.78614168 | 0.6494161 |
| A_52_P2467 | 18584.5  | Detected   | 17418.5  | Detected   | 20082.7  | Detected   | 23733.9 | Detected   | Chmp5         | 1.277080363 | 1.08061557 | 1.36256853 | 1.1529523 |
| A_66_P1251 | 9228.4   | Detected   | 7564.6   | Detected   | 11125.8  | Detected   | 11784.1 | Detected   | Aip           | 1.276938581 | 1.20560444 | 1.55779552 | 1.4707718 |
| A_66_P1358 | 41585    | Detected   | 47370.7  | Detected   | 42505    | Detected   | 53100.4 | Detected   | Rrp1          | 1.276912348 | 1.02212336 | 1.12095451 | 0.8972846 |
| A_52_P4492 | 121      | Detected   | 129.2    | Detected   | 90       | Detected   | 154.5   | Detected   | Atp11b        | 1.276859504 | 0.74380165 | 1.19582043 | 0.6965944 |
| A_51_P2473 | 320.4    | Detected   | 327.9    | Detected   | 363.9    | Detected   | 409.1   | Detected   | Ptprcap       | 1.276841448 | 1.13576779 | 1.24763647 | 1.1097896 |
| A_55_P1963 | 96.1     | Detected   | 95.7     | Detected   | 121.8    | Detected   | 122.7   | Detected   | Myoz3         | 1.276795005 | 1.26742976 | 1.28213166 | 1.2727273 |
| A_55_P1958 | 94.3     | Detected   | 90       | Detected   | 97.8     | Detected   | 120.4   | Detected   | Gm9802        | 1.276776246 | 1.03711559 | 1.33777778 | 1.0866667 |
| A_55_P2135 | 15.9     | Detected   | 18.7     | Detected   | 20.6     | Detected   | 20.3    | Not Detect | Olf1348       | 1.27672956  | 1.29559748 | 1.0855615  | 1.1016043 |
| A_66_P1357 | 33487.8  | Detected   | 22964.3  | Detected   | 27260.9  | Detected   | 42754.2 | Detected   | Wdr1          | 1.276709727 | 0.81405467 | 1.86176805 | 1.1870991 |
| A_55_P1952 | 1549.4   | Detected   | 1167.1   | Detected   | 1966.5   | Detected   | 1977.9  | Detected   | Npb           | 1.276558668 | 1.26920098 | 1.69471339 | 1.6849456 |
| A_55_P2151 | 106.7    | Detected   | 141.8    | Detected   | 112.5    | Detected   | 136.2   | Detected   | Mcm9          | 1.276476101 | 1.05435801 | 0.96050776 | 0.7933709 |
| A_55_P2040 | 12.3     | Not Detect | 19.5     | Detected   | 9.9      | Not Detect | 15.7    | Not Detect | Dnali1        | 1.276422764 | 0.80487805 | 0.80512821 | 0.5076923 |
| A_55_P1974 | 4426.5   | Detected   | 4046.6   | Detected   | 4576.3   | Detected   | 5649.9  | Detected   | Fam172a       | 1.276380888 | 1.03384164 | 1.39620916 | 1.1309    |
| A_65_P1568 | 5227     | Detected   | 4218.5   | Detected   | 7118.2   | Detected   | 6670.1  | Detected   | Mut           | 1.276085709 | 1.36181366 | 1.58115444 | 1.687377  |
| A_55_P2010 | 20.3     | Detected   | 14       | Not Detect | 70.6     | Detected   | 25.9    | Not Detect | Serpina1a     | 1.275862069 | 3.47783251 | 1.85       | 5.0428571 |
| A_51_P1662 | 1071     | Detected   | 882.1    | Detected   | 1380     | Detected   | 1366.4  | Detected   | Acy1          | 1.275816993 | 1.28851541 | 1.54903072 | 1.5644485 |
| A_55_P1986 | 67.1     | Detected   | 47.2     | Detected   | 66.6     | Detected   | 85.6    | Detected   | Cacna1h       | 1.275707899 | 0.99254844 | 1.81355932 | 1.4110169 |
| A_51_P2759 | 11266.2  | Detected   | 11294.5  | Detected   | 15948.6  | Detected   | 14371.4 | Detected   | Dcps          | 1.275620884 | 1.41561485 | 1.27242463 | 1.4120678 |
| A_55_P1991 | 19579.1  | Detected   | 16818.4  | Detected   | 16653.2  | Detected   | 24975   | Detected   | Tom1l2        | 1.275594895 | 0.85056004 | 1.48498074 | 0.9901774 |
| A_55_P2025 | 25.4     | Detected   | 31.7     | Detected   | 26.9     | Detected   | 32.4    | Not Detect | Rfesd         | 1.275590551 | 1.05905512 | 1.02208202 | 0.8485804 |
| A_55_P2062 | 63.5     | Detected   | 84       | Detected   | 90.7     | Detected   | 81      | Detected   | Ppp3cc        | 1.275590551 | 1.42834646 | 0.96428571 | 1.0797619 |

|            |          |            |          |          |          |            |          |            |               |             |            |            |           |
|------------|----------|------------|----------|----------|----------|------------|----------|------------|---------------|-------------|------------|------------|-----------|
| A_55_P2048 | 26967.5  | Detected   | 27834.3  | Detected | 38369.7  | Detected   | 34397.7  | Detected   | Ganab         | 1.275524242 | 1.42281264 | 1.23580259 | 1.3785042 |
| A_55_P1957 | 159      | Detected   | 205.9    | Detected | 189.5    | Detected   | 202.8    | Detected   | Ggnbp1        | 1.275471698 | 1.1918239  | 0.98494415 | 0.9203497 |
| A_51_P1899 | 23847.9  | Detected   | 31910.6  | Detected | 32192    | Detected   | 30415.2  | Detected   | Ppan          | 1.275382738 | 1.34988825 | 0.95313783 | 1.0088184 |
| A_55_P2196 | 38.5     | Detected   | 34.8     | Detected | 44.1     | Detected   | 49.1     | Detected   | 4930533B01Rik | 1.275324675 | 1.14545455 | 1.41091954 | 1.2672414 |
| A_55_P1964 | 10635.6  | Detected   | 9829.3   | Detected | 10457.6  | Detected   | 13563.8  | Detected   | Pla2g4b       | 1.275320621 | 0.98326376 | 1.3799355  | 1.0639211 |
| A_55_P2007 | 454.5    | Detected   | 445.1    | Detected | 344.3    | Detected   | 579.6    | Detected   | Fmn2          | 1.275247525 | 0.75753575 | 1.30217929 | 0.773534  |
| A_55_P2117 | 62.5     | Detected   | 55.7     | Detected | 52.9     | Detected   | 79.7     | Detected   | Asb4          | 1.2752      | 0.8464     | 1.43087971 | 0.9497307 |
| A_55_P2122 | 28       | Detected   | 27.5     | Detected | 22.5     | Detected   | 35.7     | Not Detect | Asb11         | 1.275       | 0.80357143 | 1.29818182 | 0.8181818 |
| A_55_P2048 | 207.3    | Detected   | 215      | Detected | 211.3    | Detected   | 264.3    | Detected   | 4930515G16Rik | 1.274963821 | 1.01929571 | 1.22930233 | 0.9827907 |
| A_52_P6251 | 456.2    | Detected   | 473.2    | Detected | 614.5    | Detected   | 581.6    | Detected   | Asph          | 1.274879439 | 1.34699693 | 1.22907861 | 1.2986052 |
| A_52_P6110 | 352.6    | Detected   | 284.1    | Detected | 417.6    | Detected   | 449.5    | Detected   | Esd           | 1.274815655 | 1.18434487 | 1.58218937 | 1.469905  |
| A_55_P2035 | 108.1    | Detected   | 123.5    | Detected | 123.3    | Detected   | 137.8    | Detected   | Zfp473        | 1.274745606 | 1.14061055 | 1.11578947 | 0.9983806 |
| A_55_P2425 | 1746.5   | Detected   | 1695.6   | Detected | 1550.8   | Detected   | 2226.1   | Detected   | D030063E12    | 1.274606356 | 0.88794732 | 1.3128686  | 0.9146025 |
| A_55_P1980 | 23788    | Detected   | 20548.9  | Detected | 29503.3  | Detected   | 30320.2  | Detected   | Psenen        | 1.274600639 | 1.24025979 | 1.4755145  | 1.4357606 |
| A_55_P2082 | 222377.2 | Detected   | 253663.5 | Detected | 220432.5 | Detected   | 283437.5 | Detected   | Rpl21         | 1.274579858 | 0.99125495 | 1.11737597 | 0.8689957 |
| A_52_P4006 | 3970.2   | Detected   | 3687.1   | Detected | 3931.9   | Detected   | 5060.3   | Detected   | AW209491      | 1.274570551 | 0.99035313 | 1.37243362 | 1.0663936 |
| A_55_P1989 | 25.5     | Detected   | 28.5     | Detected | 25.1     | Detected   | 32.5     | Not Detect | Slco3a1       | 1.274509804 | 0.98431373 | 1.14035088 | 0.8807018 |
| A_52_P6707 | 15.3     | Detected   | 18.5     | Detected | 8.2      | Not Detect | 19.5     | Not Detect | 1700030J22Rik | 1.274509804 | 0.53594771 | 1.05405405 | 0.4432432 |
| A_55_P2414 | 1916.7   | Detected   | 2105.5   | Detected | 3279     | Detected   | 2442.8   | Detected   | B130021B11Rik | 1.274482183 | 1.71075286 | 1.16019948 | 1.5573498 |
| A_52_P2371 | 1154.7   | Detected   | 1489.6   | Detected | 1324.6   | Detected   | 1471.6   | Detected   | Spty2d1       | 1.274443578 | 1.14713778 | 0.98791622 | 0.889232  |
| A_51_P3169 | 4693.7   | Detected   | 4530.6   | Detected | 4020.4   | Detected   | 5981.4   | Detected   | Ccdc6         | 1.274346464 | 0.8565524  | 1.32022249 | 0.887388  |
| A_55_P2032 | 597.2    | Detected   | 649.9    | Detected | 548.1    | Detected   | 761      | Detected   | Gm6934        | 1.274279973 | 0.91778299 | 1.17094938 | 0.8433605 |
| A_55_P2132 | 43.4     | Detected   | 40.3     | Detected | 43.8     | Detected   | 55.3     | Detected   | Glp1r         | 1.274193548 | 1.00921659 | 1.37220844 | 1.0868486 |
| A_51_P3711 | 2858.8   | Detected   | 2455.5   | Detected | 2795.9   | Detected   | 3642.5   | Detected   | Sos2          | 1.274136001 | 0.97799776 | 1.4834046  | 1.1386276 |
| A_55_P2166 | 61.3     | Detected   | 60.9     | Detected | 50.8     | Detected   | 78.1     | Detected   | Foxi1         | 1.27406199  | 0.82871126 | 1.28243021 | 0.8341544 |
| A_51_P2844 | 5111.9   | Detected   | 5202.3   | Detected | 4374.2   | Detected   | 6511.7   | Detected   | Tsc22d4       | 1.273831648 | 0.85568967 | 1.25169637 | 0.8408204 |
| A_55_P2251 | 9.5      | Not Detect | 20.3     | Detected | 38.4     | Detected   | 12.1     | Not Detect | A930038B10Rik | 1.273684211 | 4.04210526 | 0.59605911 | 1.8916256 |
| A_55_P2185 | 689.6    | Detected   | 755.1    | Detected | 768.3    | Detected   | 878.3    | Detected   | 1700016P03Rik | 1.273636891 | 1.11412413 | 1.1631572  | 1.0174811 |
| A_51_P3457 | 4819.3   | Detected   | 5347.9   | Detected | 4335.1   | Detected   | 6138     | Detected   | E130309D02Rik | 1.27362895  | 0.89952898 | 1.14774023 | 0.8106173 |
| A_55_P2115 | 10.6     | Not Detect | 18.8     | Detected | 12.3     | Not Detect | 13.5     | Not Detect | 1700012D14Rik | 1.273584906 | 1.16037736 | 0.71808511 | 0.6542553 |
| A_51_P5021 | 16243.5  | Detected   | 11429.2  | Detected | 17140.2  | Detected   | 20686.6  | Detected   | Slc9a3r1      | 1.273530951 | 1.05520362 | 1.80997795 | 1.499685  |
| A_51_P5121 | 970.4    | Detected   | 1015.6   | Detected | 905.6    | Detected   | 1235.8   | Detected   | AF067063      | 1.273495466 | 0.93322341 | 1.21681764 | 0.8916896 |
| A_66_P1217 | 7041.7   | Detected   | 9077     | Detected | 8674.8   | Detected   | 8967.2   | Detected   | Ilf2          | 1.273442493 | 1.23191843 | 0.98790349 | 0.9556902 |
| A_55_P2111 | 4666.3   | Detected   | 4698.1   | Detected | 6551.1   | Detected   | 5942     | Detected   | Spint2        | 1.273385766 | 1.40391745 | 1.26476661 | 1.3944148 |
| A_55_P2038 | 428.4    | Detected   | 380.5    | Detected | 461.5    | Detected   | 545.5    | Detected   | Zfp235        | 1.27334267  | 1.07726424 | 1.43363995 | 1.2128778 |
| A_51_P4239 | 122.3    | Detected   | 134.1    | Detected | 110.4    | Detected   | 155.7    | Detected   | Tas1r3        | 1.273098937 | 0.90269828 | 1.16107383 | 0.8232662 |
| A_66_P1182 | 32.6     | Detected   | 60.8     | Detected | 28.7     | Detected   | 41.5     | Not Detect | Wdfy1         | 1.273006135 | 0.8803681  | 0.68256579 | 0.4720395 |
| A_55_P2183 | 154.6    | Detected   | 173.8    | Detected | 168.9    | Detected   | 196.8    | Detected   | Tmem201       | 1.272962484 | 1.09249677 | 1.13233602 | 0.9718067 |
| A_51_P3577 | 35908    | Detected   | 39790.8  | Detected | 28102.1  | Detected   | 45699.7  | Detected   | Jund          | 1.272688537 | 0.7826139  | 1.14849915 | 0.7062462 |
| A_55_P2064 | 349.3    | Detected   | 386.6    | Detected | 389.4    | Detected   | 444.5    | Detected   | Gng7          | 1.27254509  | 1.11480103 | 1.1497672  | 1.0072426 |

|            |          |          |          |            |          |            |          |            |               |             |            |            |           |
|------------|----------|----------|----------|------------|----------|------------|----------|------------|---------------|-------------|------------|------------|-----------|
| A_55_P2133 | 206.6    | Detected | 188.7    | Detected   | 194.5    | Detected   | 262.9    | Detected   | Ttll10        | 1.27250726  | 0.94143272 | 1.39321675 | 1.0307366 |
| A_66_P1230 | 1274.5   | Detected | 1395.5   | Detected   | 1162.4   | Detected   | 1621.7   | Detected   | LOC432754     | 1.272420557 | 0.91204394 | 1.16209244 | 0.8329631 |
| A_55_P2009 | 211618.6 | Detected | 243119.8 | Detected   | 206071.3 | Detected   | 269249.4 | Detected   | LOC100505283  | 1.272333339 | 0.97378633 | 1.10747623 | 0.8476122 |
| A_55_P1975 | 1442     | Detected | 1150.5   | Detected   | 1230.4   | Detected   | 1834.6   | Detected   | Arhgef11      | 1.272260749 | 0.85325936 | 1.59461104 | 1.0694481 |
| A_55_P2158 | 228.9    | Detected | 240.7    | Detected   | 235.2    | Detected   | 291.2    | Detected   | Cldn7         | 1.272171254 | 1.02752294 | 1.20980474 | 0.97715   |
| A_55_P2121 | 15.8     | Detected | 15.1     | Detected   | 13.6     | Not Detect | 20.1     | Not Detect | Ankfn1        | 1.272151899 | 0.86075949 | 1.33112583 | 0.9006623 |
| A_55_P2005 | 31.6     | Detected | 46.1     | Detected   | 36       | Detected   | 40.2     | Not Detect | Foxr1         | 1.272151899 | 1.13924051 | 0.87201735 | 0.7809111 |
| A_66_P1310 | 25767    | Detected | 21628.3  | Detected   | 31922.5  | Detected   | 32778.3  | Detected   | Rabl6         | 1.272103854 | 1.23889083 | 1.51552827 | 1.4759597 |
| A_55_P2340 | 1547.6   | Detected | 1843.8   | Detected   | 1633.7   | Detected   | 1968.7   | Detected   | E230006M18Rik | 1.272098734 | 1.05563453 | 1.06774054 | 0.8860505 |
| A_51_P4875 | 11006.8  | Detected | 11220.6  | Detected   | 12618.6  | Detected   | 14001.7  | Detected   | Mob1a         | 1.272095432 | 1.14643675 | 1.24785662 | 1.1245923 |
| A_55_P2169 | 26.1     | Detected | 34.4     | Detected   | 28.6     | Detected   | 33.2     | Not Detect | Gm15056       | 1.272030651 | 1.09578544 | 0.96511628 | 0.8313953 |
| A_55_P2064 | 418      | Detected | 437.2    | Detected   | 471.6    | Detected   | 531.7    | Detected   | Uba3          | 1.272009569 | 1.12822967 | 1.21614822 | 1.0786825 |
| A_55_P2073 | 61.4     | Detected | 59.1     | Detected   | 79.9     | Detected   | 78.1     | Detected   | Ankrd40       | 1.271986971 | 1.30130293 | 1.321489   | 1.3519459 |
| A_66_P1263 | 4810.5   | Detected | 5012.5   | Detected   | 6651     | Detected   | 6118.6   | Detected   | Mrpl46        | 1.271925995 | 1.38260056 | 1.22066833 | 1.3268828 |
| A_51_P2439 | 1642.1   | Detected | 2116.5   | Detected   | 1902.8   | Detected   | 2088.6   | Detected   | Qrs1          | 1.271907923 | 1.15876012 | 0.98681786 | 0.8990314 |
| A_51_P1037 | 6210     | Detected | 5624.5   | Detected   | 7488.3   | Detected   | 7898.4   | Detected   | Kat8          | 1.271884058 | 1.20584541 | 1.40428483 | 1.3313717 |
| A_51_P1114 | 1884.8   | Detected | 2183.3   | Detected   | 1619.7   | Detected   | 2397     | Detected   | Arl15         | 1.271752971 | 0.85934847 | 1.09787936 | 0.7418587 |
| A_55_P2115 | 5292.9   | Detected | 4247.4   | Detected   | 6643.6   | Detected   | 6730.5   | Detected   | Aip           | 1.271609137 | 1.25519092 | 1.58461647 | 1.5641569 |
| A_55_P1995 | 5174.2   | Detected | 6305     | Detected   | 4934.7   | Detected   | 6579.3   | Detected   | Pomp          | 1.271558888 | 0.95371265 | 1.04350515 | 0.7826646 |
| A_66_P1009 | 24171.1  | Detected | 19676.2  | Detected   | 27457.2  | Detected   | 30732.3  | Detected   | Tmem256       | 1.271448134 | 1.13595161 | 1.5619022  | 1.3954524 |
| A_55_P1971 | 46.1     | Detected | 55.3     | Detected   | 46.1     | Detected   | 58.6     | Detected   | Fbll1         | 1.271149675 | 1          | 1.0596745  | 0.8336347 |
| A_51_P3553 | 56.8     | Detected | 96.8     | Detected   | 44.9     | Detected   | 72.2     | Detected   | Cyp3a11       | 1.271126761 | 0.79049296 | 0.74586777 | 0.463843  |
| A_51_P3789 | 804.5    | Detected | 889.5    | Detected   | 1065.3   | Detected   | 1022.6   | Detected   | Ccdc159       | 1.271100062 | 1.32417651 | 1.14963463 | 1.1976391 |
| A_55_P2014 | 27.3     | Detected | 27.6     | Detected   | 35.4     | Detected   | 34.7     | Not Detect | Olf94         | 1.271062271 | 1.2967033  | 1.25724638 | 1.2826087 |
| A_55_P2003 | 32.1     | Detected | 28       | Detected   | 24.9     | Detected   | 40.8     | Not Detect | Pcdh1         | 1.271028037 | 0.77570093 | 1.45714286 | 0.8892857 |
| A_55_P2029 | 15.5     | Detected | 10.4     | Not Detect | 19.6     | Detected   | 19.7     | Not Detect | Btbd8         | 1.270967742 | 1.26451613 | 1.89423077 | 1.8846154 |
| A_55_P2203 | 952.7    | Detected | 965.8    | Detected   | 1072.5   | Detected   | 1210.8   | Detected   | Scn5a         | 1.270914244 | 1.12574787 | 1.25367571 | 1.1104784 |
| A_51_P3465 | 689.9    | Detected | 589.1    | Detected   | 474.1    | Detected   | 876.8    | Detected   | Zcchc7        | 1.270908827 | 0.68720104 | 1.48837209 | 0.804787  |
| A_51_P3783 | 733.7    | Detected | 886.2    | Detected   | 672.2    | Detected   | 932.4    | Detected   | 4933436C20Rik | 1.270819136 | 0.91617827 | 1.0521327  | 0.7585195 |
| A_51_P4361 | 3740.9   | Detected | 3745.6   | Detected   | 6834     | Detected   | 4754     | Detected   | Nudt22        | 1.270817183 | 1.82683312 | 1.26922255 | 1.8245408 |
| A_55_P2248 | 132.6    | Detected | 144.6    | Detected   | 111.3    | Detected   | 168.5    | Detected   | C430003N24Rik | 1.270739065 | 0.83936652 | 1.16528354 | 0.7697095 |
| A_55_P2053 | 11044.5  | Detected | 7670.6   | Detected   | 6012.9   | Detected   | 14034.3  | Detected   | Map4          | 1.270704876 | 0.54442483 | 1.82962219 | 0.7838891 |
| A_55_P2347 | 716.3    | Detected | 734.2    | Detected   | 1085     | Detected   | 910.2    | Detected   | 3010003L21Rik | 1.270696635 | 1.51472847 | 1.2397167  | 1.477799  |
| A_51_P4060 | 4792.5   | Detected | 6253     | Detected   | 5552.9   | Detected   | 6089.2   | Detected   | Fam203a       | 1.270568597 | 1.15866458 | 0.97380457 | 0.8880377 |
| A_52_P6241 | 67254.9  | Detected | 79791.2  | Detected   | 80176.1  | Detected   | 85446.8  | Detected   | Hsp90b1       | 1.270491815 | 1.1921228  | 1.07088    | 1.0048238 |
| A_52_P4302 | 4764.1   | Detected | 7079.8   | Detected   | 3667.6   | Detected   | 6052.3   | Detected   | Nacc1         | 1.270397347 | 0.7698411  | 0.85486878 | 0.5180372 |
| A_51_P1685 | 1992.5   | Detected | 2068.2   | Detected   | 2202.2   | Detected   | 2531.2   | Detected   | Mob1a         | 1.270363864 | 1.10524467 | 1.22386616 | 1.0647906 |
| A_51_P1774 | 105.8    | Detected | 135.4    | Detected   | 103.6    | Detected   | 134.4    | Detected   | Ctrl          | 1.270321361 | 0.97920605 | 0.99261448 | 0.7651403 |
| A_51_P4352 | 7584.2   | Detected | 8399.5   | Detected   | 5858.2   | Detected   | 9633.5   | Detected   | Cul4a         | 1.270206482 | 0.77242161 | 1.14691351 | 0.6974463 |
| A_55_P2113 | 23949.9  | Detected | 27915.2  | Detected   | 27310.4  | Detected   | 30419.8  | Detected   | Nup205        | 1.27014309  | 1.14031374 | 1.08972173 | 0.9783344 |

|            |         |            |         |          |         |            |         |            |               |             |            |            |           |
|------------|---------|------------|---------|----------|---------|------------|---------|------------|---------------|-------------|------------|------------|-----------|
| A_55_P1970 | 676.1   | Detected   | 579.4   | Detected | 496.3   | Detected   | 858.7   | Detected   | Igsf9b        | 1.270078391 | 0.73406301 | 1.4820504  | 0.8565758 |
| A_52_P8721 | 15621.7 | Detected   | 17863.8 | Detected | 17839.6 | Detected   | 19838.8 | Detected   | Dcun1d5       | 1.269951414 | 1.14197559 | 1.11055878 | 0.9986453 |
| A_51_P4603 | 285.4   | Detected   | 310.6   | Detected | 242.5   | Detected   | 362.4   | Detected   | Zfp65         | 1.269796776 | 0.84968465 | 1.16677399 | 0.7807469 |
| A_55_P1964 | 1038    | Detected   | 728.6   | Detected | 696.8   | Detected   | 1318    | Detected   | Agfg2         | 1.269749518 | 0.67129094 | 1.80894867 | 0.9563547 |
| A_55_P2130 | 10225.9 | Detected   | 10978.6 | Detected | 10974.5 | Detected   | 12984.3 | Detected   | Tuft1         | 1.269746428 | 1.07320627 | 1.18269178 | 0.9996265 |
| A_52_P2094 | 48.2    | Detected   | 21.9    | Detected | 34.3    | Detected   | 61.2    | Detected   | Tmem88        | 1.269709544 | 0.71161826 | 2.79452055 | 1.56621   |
| A_55_P2091 | 1663.9  | Detected   | 1424.4  | Detected | 1530.9  | Detected   | 2112.6  | Detected   | Cep164        | 1.269667648 | 0.92006731 | 1.4831508  | 1.0747683 |
| A_55_P2128 | 29185.7 | Detected   | 29851.2 | Detected | 27632   | Detected   | 37056   | Detected   | Clta          | 1.269662883 | 0.94676503 | 1.24135713 | 0.9256579 |
| A_52_P6285 | 2503.8  | Detected   | 2835.4  | Detected | 1914.8  | Detected   | 3178.7  | Detected   | Pvr           | 1.269550284 | 0.76475757 | 1.12107639 | 0.6753192 |
| A_55_P2030 | 208.5   | Detected   | 240     | Detected | 237.8   | Detected   | 264.7   | Detected   | Ifna1         | 1.269544365 | 1.14052758 | 1.10291667 | 0.9908333 |
| A_52_P7110 | 1340.3  | Detected   | 903.2   | Detected | 1546.9  | Detected   | 1701.4  | Detected   | Sertad3       | 1.269417295 | 1.15414459 | 1.88374668 | 1.7126882 |
| A_55_P2005 | 21.9    | Detected   | 23.6    | Detected | 26.4    | Detected   | 27.8    | Not Detect | Dcps          | 1.269406393 | 1.20547945 | 1.1779661  | 1.1186441 |
| A_55_P2100 | 1957.9  | Detected   | 2001.2  | Detected | 1821.2  | Detected   | 2485.1  | Detected   | Irf6          | 1.269268093 | 0.9301803  | 1.24180492 | 0.910054  |
| A_51_P2055 | 7.8     | Not Detect | 90.3    | Detected | 3.5     | Not Detect | 9.9     | Not Detect | Otor          | 1.269230769 | 0.44871795 | 0.10963455 | 0.0387597 |
| A_55_P2161 | 76.9    | Detected   | 97.5    | Detected | 105.7   | Detected   | 97.6    | Detected   | Zfp94         | 1.269180754 | 1.37451235 | 1.00102564 | 1.0841026 |
| A_55_P2098 | 45.7    | Detected   | 36.1    | Detected | 24.5    | Detected   | 58      | Detected   | Dnajc2        | 1.269146608 | 0.53610503 | 1.6066482  | 0.6786704 |
| A_52_P5557 | 25109.3 | Detected   | 24598.1 | Detected | 18612.8 | Detected   | 31866.5 | Detected   | Ywhag         | 1.269111445 | 0.74127116 | 1.29548624 | 0.7566763 |
| A_66_P1117 | 1397.4  | Detected   | 1298.6  | Detected | 1480.8  | Detected   | 1773.4  | Detected   | 4930432M17Rik | 1.269071132 | 1.05968227 | 1.36562452 | 1.1403049 |
| A_51_P1918 | 2233    | Detected   | 1537.2  | Detected | 3100.2  | Detected   | 2833.8  | Detected   | 2410022M11Rik | 1.269055083 | 1.38835647 | 1.84348165 | 2.0167838 |
| A_55_P1976 | 903.2   | Detected   | 758.8   | Detected | 1010.4  | Detected   | 1146.2  | Detected   | Fbxl20        | 1.269043401 | 1.11868911 | 1.51054296 | 1.3315762 |
| A_55_P1961 | 74796.8 | Detected   | 62477.7 | Detected | 75734.6 | Detected   | 94906.9 | Detected   | Ppp1cc        | 1.268863106 | 1.01253797 | 1.5190524  | 1.2121861 |
| A_51_P1760 | 3659.8  | Detected   | 5251.9  | Detected | 3134.2  | Detected   | 4643.6  | Detected   | Cmtr2         | 1.268812503 | 0.85638559 | 0.88417525 | 0.5967745 |
| A_55_P2435 | 2552.5  | Detected   | 2368.2  | Detected | 2483.5  | Detected   | 3238.6  | Detected   | 5830418K08Rik | 1.268795299 | 0.97296768 | 1.36753653 | 1.0486868 |
| A_51_P2363 | 2464.9  | Detected   | 2328    | Detected | 3045.5  | Detected   | 3127.3  | Detected   | Gtf2e1        | 1.268733011 | 1.23554708 | 1.34334192 | 1.3082045 |
| A_55_P2074 | 596.9   | Detected   | 699.8   | Detected | 526.4   | Detected   | 757.3   | Detected   | Lyar          | 1.268721729 | 0.88188976 | 1.08216633 | 0.7522149 |
| A_55_P2133 | 108.3   | Detected   | 102.7   | Detected | 117.9   | Detected   | 137.4   | Detected   | Gm436         | 1.268698061 | 1.08864266 | 1.33787731 | 1.1480039 |
| A_55_P1967 | 93.8    | Detected   | 112.9   | Detected | 123.7   | Detected   | 119     | Detected   | Kdelc1        | 1.268656716 | 1.31876333 | 1.05403012 | 1.0956599 |
| A_55_P2132 | 13.4    | Detected   | 16.6    | Detected | 13.5    | Not Detect | 17      | Not Detect | Gm9804        | 1.268656716 | 1.00746269 | 1.02409639 | 0.813253  |
| A_55_P2125 | 37.6    | Detected   | 37.3    | Detected | 48.9    | Detected   | 47.7    | Not Detect | Cacna1d       | 1.268617021 | 1.30053191 | 1.27882038 | 1.310992  |
| A_65_P0482 | 57      | Detected   | 68.8    | Detected | 47      | Detected   | 72.3    | Detected   | Cwc25         | 1.268421053 | 0.8245614  | 1.05087209 | 0.6831395 |
| A_51_P1055 | 31030.1 | Detected   | 32652.8 | Detected | 34066.4 | Detected   | 39356.7 | Detected   | Nomo1         | 1.268339451 | 1.09785015 | 1.20530858 | 1.0432918 |
| A_52_P4943 | 590.7   | Detected   | 1685.7  | Detected | 461.8   | Detected   | 749.2   | Detected   | Zxdc          | 1.268325715 | 0.78178432 | 0.44444444 | 0.2739515 |
| A_55_P1983 | 15936.6 | Detected   | 16491.2 | Detected | 19487.4 | Detected   | 20212.7 | Detected   | Sdhc          | 1.268319466 | 1.22280788 | 1.22566581 | 1.1816848 |
| A_55_P2356 | 8.2     | Not Detect | 19.4    | Detected | 11.3    | Not Detect | 10.4    | Not Detect | 6430562O15Rik | 1.268292683 | 1.37804878 | 0.53608247 | 0.5824742 |
| A_51_P1696 | 711.7   | Detected   | 847.5   | Detected | 819.4   | Detected   | 902.6   | Detected   | Utp15         | 1.268230996 | 1.15132781 | 1.06501475 | 0.9668437 |
| A_51_P2884 | 18876   | Detected   | 25115   | Detected | 19342.4 | Detected   | 23939.1 | Detected   | Nup133        | 1.268229498 | 1.02470862 | 0.95317937 | 0.7701533 |
| A_51_P2017 | 49.6    | Detected   | 56.4    | Detected | 88      | Detected   | 62.9    | Detected   | Morn5         | 1.268145161 | 1.77419355 | 1.11524823 | 1.5602837 |
| A_66_P1360 | 23614.7 | Detected   | 21807.5 | Detected | 24421.2 | Detected   | 29944.5 | Detected   | Coasy         | 1.268044904 | 1.03415246 | 1.37312851 | 1.1198533 |
| A_55_P2231 | 65.3    | Detected   | 72.2    | Detected | 57.2    | Detected   | 82.8    | Detected   | Gm13372       | 1.267993874 | 0.87595712 | 1.1468144  | 0.7922438 |
| A_51_P5118 | 844.3   | Detected   | 673.2   | Detected | 767.6   | Detected   | 1070.5  | Detected   | Oma1          | 1.267914248 | 0.90915551 | 1.59016637 | 1.1402258 |

|            |          |            |          |            |         |          |          |            |               |             |            |            |           |
|------------|----------|------------|----------|------------|---------|----------|----------|------------|---------------|-------------|------------|------------|-----------|
| A_55_P1989 | 8507.5   | Detected   | 5444.1   | Detected   | 8114.6  | Detected | 10786.4  | Detected   | Tmem164       | 1.267869527 | 0.95381722 | 1.98130086 | 1.490531  |
| A_66_P1211 | 66.1     | Detected   | 55.2     | Detected   | 72.9    | Detected | 83.8     | Detected   | Gm15413       | 1.267776097 | 1.10287443 | 1.51811594 | 1.3206522 |
| A_55_P2181 | 348.8    | Detected   | 450.4    | Detected   | 332.2   | Detected | 442.2    | Detected   | Btg1          | 1.267775229 | 0.95240826 | 0.98179396 | 0.7375666 |
| A_55_P2040 | 10533.6  | Detected   | 8873.7   | Detected   | 8203    | Detected | 13354.1  | Detected   | Lrrc45        | 1.267762209 | 0.77874611 | 1.50490776 | 0.9244171 |
| A_55_P1960 | 1711.2   | Detected   | 1577.8   | Detected   | 1448.8  | Detected | 2169.2   | Detected   | Polg          | 1.267648434 | 0.84665732 | 1.37482571 | 0.9182406 |
| A_55_P2002 | 29734    | Detected   | 21178.5  | Detected   | 35743.3 | Detected | 37690.5  | Detected   | Nelfb         | 1.267589292 | 1.20210197 | 1.77965862 | 1.6877163 |
| A_55_P2103 | 25083.9  | Detected   | 27987.9  | Detected   | 21835.5 | Detected | 31794.5  | Detected   | Gsr           | 1.267526182 | 0.87049861 | 1.13600878 | 0.7801764 |
| A_52_P2380 | 49       | Detected   | 47.2     | Detected   | 51.6    | Detected | 62.1     | Detected   | Anapc11       | 1.267346939 | 1.05306122 | 1.31567797 | 1.0932203 |
| A_51_P2296 | 20148.4  | Detected   | 17297.3  | Detected   | 24249.2 | Detected | 25535    | Detected   | Plscr1        | 1.267346291 | 1.20352981 | 1.47624196 | 1.4019067 |
| A_51_P4617 | 15466.6  | Detected   | 14110.6  | Detected   | 13297.2 | Detected | 19601.2  | Detected   | Atp6ap2       | 1.267324428 | 0.85973646 | 1.38911173 | 0.9423554 |
| A_55_P2007 | 34.8     | Detected   | 41.2     | Detected   | 42.3    | Detected | 44.1     | Not Detect | A530021J07Rik | 1.267241379 | 1.21551724 | 1.07038835 | 1.026699  |
| A_55_P2021 | 76017.5  | Detected   | 71241.7  | Detected   | 99083.4 | Detected | 96327.3  | Detected   | Tbrg1         | 1.26717269  | 1.30342882 | 1.35211962 | 1.3908062 |
| A_51_P3721 | 22215.4  | Detected   | 27195.5  | Detected   | 12785.9 | Detected | 28150.7  | Detected   | Plod3         | 1.267170521 | 0.57554219 | 1.03512346 | 0.4701476 |
| A_55_P2043 | 464.5    | Detected   | 403.2    | Detected   | 707.3   | Detected | 588.6    | Detected   | Zfp607        | 1.267168999 | 1.52271259 | 1.45982143 | 1.7542163 |
| A_55_P2045 | 5070.2   | Detected   | 4953     | Detected   | 4091.9  | Detected | 6424.8   | Detected   | Mlxpl         | 1.267168948 | 0.80704903 | 1.29715324 | 0.8261458 |
| A_55_P2094 | 14.6     | Not Detect | 49.8     | Detected   | 23.1    | Detected | 18.5     | Not Detect | Ms4a10        | 1.267123288 | 1.58219178 | 0.37148594 | 0.4638554 |
| A_65_P1105 | 20441.6  | Detected   | 18043.5  | Detected   | 23896.6 | Detected | 25901.9  | Detected   | Letm1         | 1.267117055 | 1.16901808 | 1.43552526 | 1.3243883 |
| A_51_P2084 | 7293.2   | Detected   | 6565.1   | Detected   | 7688.2  | Detected | 9241.1   | Detected   | Ppp1r12c      | 1.267084407 | 1.05416004 | 1.40760994 | 1.1710713 |
| A_55_P1980 | 5773.3   | Detected   | 5535.3   | Detected   | 5347    | Detected | 7315.1   | Detected   | Zkscan1       | 1.267056969 | 0.92616008 | 1.32153632 | 0.965982  |
| A_65_P0539 | 1825.7   | Detected   | 2439.2   | Detected   | 2179.2  | Detected | 2313.2   | Detected   | Rad18         | 1.267020869 | 1.19362436 | 0.94834372 | 0.8934077 |
| A_52_P4287 | 10131.5  | Detected   | 7078.5   | Detected   | 10916.5 | Detected | 12836.7  | Detected   | Camk2d        | 1.267008834 | 1.07748112 | 1.81347743 | 1.5422053 |
| A_55_P2136 | 181528.6 | Detected   | 244972.1 | Detected   | 219447  | Detected | 229973.4 | Detected   | Gm6981        | 1.266871446 | 1.20888389 | 0.93877384 | 0.8958041 |
| A_66_P1264 | 31165.1  | Detected   | 34761.5  | Detected   | 44269.7 | Detected | 39481.7  | Detected   | Brk1          | 1.266856195 | 1.42048959 | 1.13578816 | 1.2735267 |
| A_66_P1242 | 3177.1   | Detected   | 1860.1   | Detected   | 2258.5  | Detected | 4024.7   | Detected   | Gm6557        | 1.266784174 | 0.7108684  | 2.16370088 | 1.214182  |
| A_55_P1985 | 1222.5   | Detected   | 1138     | Detected   | 1470.4  | Detected | 1548.5   | Detected   | Fastkd1       | 1.266666667 | 1.20278119 | 1.36072056 | 1.2920914 |
| A_51_P4722 | 32901    | Detected   | 27781.1  | Detected   | 47537   | Detected | 41673.9  | Detected   | Sapcd2        | 1.266645391 | 1.4448497  | 1.50008099 | 1.7111273 |
| A_52_P5965 | 3203.4   | Detected   | 3243.4   | Detected   | 3439.5  | Detected | 4057.3   | Detected   | Kdelr1        | 1.266560529 | 1.07370294 | 1.25094037 | 1.0604612 |
| A_51_P1650 | 177.6    | Detected   | 103.3    | Detected   | 230.7   | Detected | 224.9    | Detected   | Tmem191c      | 1.266328829 | 1.29898649 | 2.17715392 | 2.2333011 |
| A_55_P2178 | 947.8    | Detected   | 830.9    | Detected   | 728.7   | Detected | 1200.2   | Detected   | Arhgap27      | 1.266300907 | 0.76883309 | 1.44445782 | 0.8770008 |
| A_55_P1973 | 1969.7   | Detected   | 2377.7   | Detected   | 2032.7  | Detected | 2494     | Detected   | Cttnbp2nl     | 1.266182667 | 1.03198457 | 1.04891281 | 0.8549018 |
| A_51_P3030 | 37.2     | Detected   | 4.1      | Not Detect | 75.2    | Detected | 47.1     | Detected   | Adcy8         | 1.266129032 | 2.02150538 | 11.4878049 | 18.341463 |
| A_55_P2002 | 16439.1  | Detected   | 18729.8  | Detected   | 19381.5 | Detected | 20812.6  | Detected   | Rap1b         | 1.266042545 | 1.1789879  | 1.11120247 | 1.0347948 |
| A_55_P2123 | 940.5    | Detected   | 1001.2   | Detected   | 945.1   | Detected | 1190.7   | Detected   | Grb2          | 1.266028708 | 1.00489102 | 1.18927287 | 0.9439672 |
| A_52_P4248 | 477.5    | Detected   | 670.6    | Detected   | 659.6   | Detected | 604.5    | Detected   | Crbn          | 1.265968586 | 1.38136126 | 0.90143155 | 0.9835968 |
| A_51_P2713 | 3756.9   | Detected   | 3571.2   | Detected   | 3547.5  | Detected | 4756.1   | Detected   | Wipf2         | 1.26596396  | 0.94426256 | 1.33179323 | 0.9933636 |
| A_55_P2137 | 528.3    | Detected   | 499.4    | Detected   | 445.2   | Detected | 668.8    | Detected   | Mrfap1        | 1.265947378 | 0.84270301 | 1.33920705 | 0.8914698 |
| A_66_P1113 | 73.7     | Detected   | 69.8     | Detected   | 105     | Detected | 93.3     | Detected   | Tmem178b      | 1.265943012 | 1.42469471 | 1.33667622 | 1.504298  |
| A_55_P2093 | 1607.7   | Detected   | 1862.7   | Detected   | 1745.4  | Detected | 2035.2   | Detected   | Zfp599        | 1.265907819 | 1.08565031 | 1.09260751 | 0.9370269 |
| A_55_P2011 | 2823.7   | Detected   | 2226.1   | Detected   | 2278.2  | Detected | 3574.5   | Detected   | Kif13a        | 1.265892269 | 0.80681376 | 1.60572301 | 1.0234042 |
| A_55_P2250 | 623.5    | Detected   | 601.2    | Detected   | 557.7   | Detected | 789.2    | Detected   | 6330566A10Rik | 1.265757819 | 0.89446672 | 1.31270792 | 0.9276447 |

|            |         |          |         |          |         |          |         |            |               |             |            |            |           |
|------------|---------|----------|---------|----------|---------|----------|---------|------------|---------------|-------------|------------|------------|-----------|
| A_55_P1969 | 63766.5 | Detected | 68154.6 | Detected | 55638.5 | Detected | 80709.1 | Detected   | Cops6         | 1.265697506 | 0.87253495 | 1.1842062  | 0.8163572 |
| A_52_P1825 | 888.4   | Detected | 1108.6  | Detected | 745.3   | Detected | 1124.4  | Detected   | Timm9         | 1.265646105 | 0.83892391 | 1.01425221 | 0.6722894 |
| A_55_P2134 | 935.1   | Detected | 847.3   | Detected | 878.3   | Detected | 1183.5  | Detected   | Fam71e1       | 1.265640038 | 0.93925783 | 1.3967898  | 1.0365868 |
| A_51_P5164 | 22844.9 | Detected | 20760.6 | Detected | 28216.4 | Detected | 28913.4 | Detected   | Eif3f         | 1.265639158 | 1.23512907 | 1.39270541 | 1.3591322 |
| A_55_P1994 | 389.7   | Detected | 420.6   | Detected | 388.6   | Detected | 493.2   | Detected   | Tmem14a       | 1.265588915 | 0.99717732 | 1.17261056 | 0.9239182 |
| A_51_P3675 | 1736.3  | Detected | 1848.9  | Detected | 1596.2  | Detected | 2197.4  | Detected   | Rsph3a        | 1.265564707 | 0.91931118 | 1.18849045 | 0.8633241 |
| A_52_P5986 | 7065    | Detected | 9345.6  | Detected | 9927.2  | Detected | 8941    | Detected   | 1190007107Rik | 1.265534324 | 1.40512385 | 0.9567069  | 1.0622325 |
| A_51_P1603 | 19703.5 | Detected | 15391.1 | Detected | 23683.3 | Detected | 24934.1 | Detected   | Wbp1          | 1.265465526 | 1.20198442 | 1.62003366 | 1.5387659 |
| A_51_P2014 | 187.6   | Detected | 244.8   | Detected | 232.4   | Detected | 237.4   | Detected   | Nrf1          | 1.265458422 | 1.23880597 | 0.96977124 | 0.9493464 |
| A_55_P2023 | 55.4    | Detected | 57      | Detected | 27      | Detected | 70.1    | Detected   | Kiss1r        | 1.26534296  | 0.48736462 | 1.22982456 | 0.4736842 |
| A_55_P2033 | 112.7   | Detected | 88.9    | Detected | 88.5    | Detected | 142.6   | Detected   | Gm12253       | 1.265306122 | 0.78527063 | 1.60404949 | 0.9955006 |
| A_55_P2084 | 493.5   | Detected | 514.4   | Detected | 609.9   | Detected | 624.4   | Detected   | Csrnp3        | 1.265248227 | 1.23586626 | 1.21384137 | 1.1856532 |
| A_51_P1827 | 386.6   | Detected | 508.6   | Detected | 408     | Detected | 489.1   | Detected   | Stx1a         | 1.265131919 | 1.05535437 | 0.96165946 | 0.8022021 |
| A_51_P4804 | 11267.9 | Detected | 14463.3 | Detected | 11414.9 | Detected | 14255.1 | Detected   | Emc8          | 1.265107074 | 1.01304591 | 0.98560494 | 0.7892321 |
| A_52_P5814 | 14648.4 | Detected | 11740   | Detected | 13621.7 | Detected | 18531.7 | Detected   | Pdha1         | 1.265100625 | 0.92991043 | 1.57850937 | 1.1602811 |
| A_55_P2384 | 367.9   | Detected | 325.4   | Detected | 370.2   | Detected | 465.3   | Detected   | 4930425O10Rik | 1.264745855 | 1.0062517  | 1.42993239 | 1.1376767 |
| A_55_P2125 | 15698.2 | Detected | 23302.7 | Detected | 4282.2  | Detected | 19854   | Detected   | Pdgfa         | 1.264730988 | 0.27278287 | 0.85200427 | 0.1837641 |
| A_52_P1789 | 1005.6  | Detected | 1366.6  | Detected | 1505.8  | Detected | 1271.8  | Detected   | Seh1l         | 1.264717582 | 1.49741448 | 0.93063076 | 1.1018586 |
| A_55_P2081 | 582.2   | Detected | 551.9   | Detected | 791.8   | Detected | 736.3   | Detected   | 1700056E22Rik | 1.264685675 | 1.36001374 | 1.3341185  | 1.4346802 |
| A_55_P2032 | 3366.5  | Detected | 2506.1  | Detected | 3850.6  | Detected | 4257.5  | Detected   | 2610034B18Rik | 1.264666568 | 1.1437992  | 1.69885479 | 1.536491  |
| A_55_P2228 | 244.1   | Detected | 253.7   | Detected | 264.6   | Detected | 308.7   | Detected   | Agtppb1       | 1.264645637 | 1.08398197 | 1.21679149 | 1.0429641 |
| A_55_P2006 | 125.9   | Detected | 123.5   | Detected | 121.2   | Detected | 159.2   | Detected   | 4930451C15Rik | 1.264495631 | 0.96266878 | 1.28906883 | 0.9813765 |
| A_55_P2169 | 48.4    | Detected | 46.5    | Detected | 33.3    | Detected | 61.2    | Detected   | Tnfrsf13b     | 1.26446281  | 0.68801653 | 1.31612903 | 0.716129  |
| A_55_P2083 | 4313.6  | Detected | 5027.9  | Detected | 4874.4  | Detected | 5454.1  | Detected   | Spryd7        | 1.264396328 | 1.13000742 | 1.084767   | 0.9694704 |
| A_51_P4372 | 116.5   | Detected | 126.6   | Detected | 108.1   | Detected | 147.3   | Detected   | Arap1         | 1.264377682 | 0.927897   | 1.16350711 | 0.8538705 |
| A_55_P2045 | 1148.3  | Detected | 1112    | Detected | 1484.5  | Detected | 1451.6  | Detected   | Sirt7         | 1.264129583 | 1.29278063 | 1.30539568 | 1.334982  |
| A_55_P2062 | 5767.8  | Detected | 7508.1  | Detected | 7004.3  | Detected | 7290.6  | Detected   | Arl1          | 1.264017476 | 1.21437983 | 0.97103129 | 0.9328991 |
| A_51_P5140 | 28.8    | Detected | 18.8    | Detected | 96.1    | Detected | 36.4    | Not Detect | Mx2           | 1.263888889 | 3.33680556 | 1.93617021 | 5.1117021 |
| A_51_P4832 | 3408.8  | Detected | 2678.5  | Detected | 3997.9  | Detected | 4307.9  | Detected   | Pomt1         | 1.263758507 | 1.17281741 | 1.60832556 | 1.4925891 |
| A_55_P2103 | 32087.2 | Detected | 26988.3 | Detected | 28743   | Detected | 40548.7 | Detected   | Hgs           | 1.263703284 | 0.89577776 | 1.50245477 | 1.0650171 |
| A_55_P2008 | 3151    | Detected | 3429.1  | Detected | 3201.9  | Detected | 3981.9  | Detected   | Syp           | 1.263694065 | 1.0161536  | 1.16120848 | 0.9337435 |
| A_65_P1668 | 703.1   | Detected | 512.5   | Detected | 595.3   | Detected | 888.5   | Detected   | Taok2         | 1.263689376 | 0.84667899 | 1.73365854 | 1.161561  |
| A_55_P2069 | 767.5   | Detected | 685     | Detected | 699.1   | Detected | 969.8   | Detected   | Sacs          | 1.263583062 | 0.91087948 | 1.41576642 | 1.0205839 |
| A_55_P2102 | 8749.7  | Detected | 6717    | Detected | 7374.5  | Detected | 11055.3 | Detected   | Spag9         | 1.263506177 | 0.8428289  | 1.64586869 | 1.097886  |
| A_55_P1995 | 47018.5 | Detected | 38752.5 | Detected | 52717.2 | Detected | 59407.4 | Detected   | Ubald2        | 1.263489903 | 1.12120123 | 1.53299529 | 1.3603561 |
| A_52_P3768 | 7304.7  | Detected | 7181.7  | Detected | 8663    | Detected | 9229.4  | Detected   | Fkbp9         | 1.263487891 | 1.18594877 | 1.28512748 | 1.2062604 |
| A_52_P4272 | 766.4   | Detected | 657.2   | Detected | 714.2   | Detected | 968.3   | Detected   | Ltn1          | 1.263439457 | 0.93188935 | 1.47337188 | 1.0867316 |
| A_52_P3030 | 1217.9  | Detected | 1045.1  | Detected | 1524.1  | Detected | 1538.5  | Detected   | Rogdi         | 1.263240003 | 1.25141637 | 1.47210793 | 1.4583293 |
| A_55_P2420 | 325.6   | Detected | 320.6   | Detected | 297.4   | Detected | 411.3   | Detected   | AL118220      | 1.263206388 | 0.91339066 | 1.28290705 | 0.9276357 |
| A_51_P5016 | 55.1    | Detected | 44.7    | Detected | 47.6    | Detected | 69.6    | Detected   | 1700120K04Rik | 1.263157895 | 0.86388385 | 1.55704698 | 1.064877  |



|            |          |            |          |          |          |            |          |            |               |             |            |            |           |
|------------|----------|------------|----------|----------|----------|------------|----------|------------|---------------|-------------|------------|------------|-----------|
| A_52_P2122 | 405.1    | Detected   | 444.6    | Detected | 337.3    | Detected   | 511.7    | Detected   | Pomt2         | 1.263144902 | 0.83263392 | 1.15092218 | 0.7586595 |
| A_55_P2081 | 4935.4   | Detected   | 5803.2   | Detected | 3831     | Detected   | 6233.4   | Detected   | Slc46a1       | 1.262997933 | 0.77622888 | 1.07413151 | 0.660153  |
| A_55_P1985 | 324.6    | Detected   | 319.4    | Detected | 363.1    | Detected   | 409.9    | Detected   | Gbbp111       | 1.262784966 | 1.11860752 | 1.28334377 | 1.136819  |
| A_55_P2108 | 12026.6  | Detected   | 9521.7   | Detected | 14162.8  | Detected   | 15186.4  | Detected   | Dgcr2         | 1.262734272 | 1.17762294 | 1.59492528 | 1.4874235 |
| A_52_P5525 | 1706.7   | Detected   | 1624.3   | Detected | 1589.3   | Detected   | 2155     | Detected   | Agtrap        | 1.262670651 | 0.93121228 | 1.32672536 | 0.9784523 |
| A_52_P4621 | 6590.6   | Detected   | 8660.6   | Detected | 5911.4   | Detected   | 8320.9   | Detected   | Smarca5-ps    | 1.262540588 | 0.89694413 | 0.96077639 | 0.6825624 |
| A_55_P2093 | 92.6     | Detected   | 99.8     | Detected | 79.9     | Detected   | 116.9    | Detected   | Gm5092        | 1.262419006 | 0.86285097 | 1.17134269 | 0.8006012 |
| A_55_P2091 | 676.6    | Detected   | 731.3    | Detected | 578.5    | Detected   | 854.1    | Detected   | Trim33        | 1.262341117 | 0.85501035 | 1.16792014 | 0.791057  |
| A_55_P2158 | 156990.4 | Detected   | 222314.9 | Detected | 167365   | Detected   | 198172   | Detected   | Rpl18a        | 1.262319225 | 1.0660843  | 0.89140224 | 0.7528285 |
| A_55_P2139 | 39734.8  | Detected   | 30512.5  | Detected | 50484.2  | Detected   | 50151.6  | Detected   | Myl12b        | 1.262158108 | 1.2705286  | 1.64364113 | 1.6545416 |
| A_55_P2052 | 51280.3  | Detected   | 56031.4  | Detected | 58537.9  | Detected   | 64713.5  | Detected   | Uqcrh         | 1.261956346 | 1.14152803 | 1.15495062 | 1.0447338 |
| A_51_P3119 | 70823.8  | Detected   | 74128.5  | Detected | 83748.4  | Detected   | 89371.7  | Detected   | P4hb          | 1.261887953 | 1.1824895  | 1.20563211 | 1.1297733 |
| A_55_P2127 | 86.3     | Detected   | 112.2    | Detected | 71.6     | Detected   | 108.9    | Detected   | Bcas3         | 1.261877173 | 0.82966396 | 0.97058824 | 0.6381462 |
| A_55_P1968 | 104.3    | Detected   | 106.5    | Detected | 96.7     | Detected   | 131.6    | Detected   | Vmn1r173      | 1.261744966 | 0.92713327 | 1.23568075 | 0.9079812 |
| A_51_P1841 | 2913.6   | Detected   | 3140.2   | Detected | 3183.7   | Detected   | 3676.2   | Detected   | Capn7         | 1.261738056 | 1.09270319 | 1.17068976 | 1.0138526 |
| A_51_P3443 | 5816.8   | Detected   | 6379.2   | Detected | 9686.4   | Detected   | 7338.6   | Detected   | Rilpl2        | 1.26162151  | 1.6652455  | 1.15039503 | 1.5184349 |
| A_51_P1657 | 100277.7 | Detected   | 104434.5 | Detected | 97944.6  | Detected   | 126508.2 | Detected   | Mcm7          | 1.261578596 | 0.97673361 | 1.21136406 | 0.9378567 |
| A_55_P2172 | 9936.2   | Detected   | 10834.7  | Detected | 8210.4   | Detected   | 12533.5  | Detected   | F10           | 1.261397717 | 0.82631187 | 1.15679253 | 0.7577875 |
| A_52_P3542 | 2543.1   | Detected   | 1855.5   | Detected | 2456.9   | Detected   | 3207.6   | Detected   | Ap2a2         | 1.26129527  | 0.96610436 | 1.72869846 | 1.3241175 |
| A_66_P1241 | 125.6    | Detected   | 111.4    | Detected | 107      | Detected   | 158.4    | Detected   | Prkx          | 1.261146497 | 0.85191083 | 1.42190305 | 0.9605027 |
| A_51_P4892 | 150649.3 | Detected   | 165852.6 | Detected | 186257.5 | Detected   | 189967.7 | Detected   | Eif3g         | 1.260992915 | 1.23636486 | 1.1454008  | 1.1230303 |
| A_55_P2214 | 105      | Detected   | 104.3    | Detected | 73.9     | Detected   | 132.4    | Detected   | 4932439E07Rik | 1.260952381 | 0.70380952 | 1.26941515 | 0.7085331 |
| A_55_P2349 | 5485.6   | Detected   | 3769.7   | Detected | 6424.3   | Detected   | 6916.7   | Detected   | 5830408B19Rik | 1.260883039 | 1.17112075 | 1.83481444 | 1.704194  |
| A_55_P1967 | 166406.1 | Detected   | 227851.9 | Detected | 208530.5 | Detected   | 209814.5 | Detected   | Gm5069        | 1.260858226 | 1.25314216 | 0.92083718 | 0.9152019 |
| A_55_P2142 | 11689.6  | Detected   | 11297.3  | Detected | 12250.9  | Detected   | 14738.7  | Detected   | Lrrc48        | 1.260838694 | 1.04801704 | 1.30462146 | 1.0844095 |
| A_66_P1380 | 32135.6  | Detected   | 40114.5  | Detected | 40297.5  | Detected   | 40515.2  | Detected   | Gfm1          | 1.26075754  | 1.25398312 | 1.00998891 | 1.0045619 |
| A_52_P6572 | 929.1    | Detected   | 1173.1   | Detected | 1125     | Detected   | 1171.3   | Detected   | Cdc40         | 1.260682381 | 1.21084921 | 0.9984656  | 0.9589975 |
| A_51_P1612 | 16.5     | Detected   | 18.7     | Detected | 37.4     | Detected   | 20.8     | Not Detect | Scg3          | 1.260606061 | 2.26666667 | 1.11229947 | 2         |
| A_52_P6615 | 14.2     | Not Detect | 33.9     | Detected | 53.4     | Detected   | 17.9     | Not Detect | Ccdc141       | 1.26056338  | 3.76056338 | 0.5280236  | 1.5752212 |
| A_55_P2160 | 516.2    | Detected   | 184.1    | Detected | 418.9    | Detected   | 650.7    | Detected   | Foxd2         | 1.260557923 | 0.81150717 | 3.53449212 | 2.2753938 |
| A_51_P3141 | 33.4     | Detected   | 65.5     | Detected | 56.1     | Detected   | 42.1     | Not Detect | Gsdma         | 1.260479042 | 1.67964072 | 0.64274809 | 0.8564885 |
| A_55_P1964 | 40775.1  | Detected   | 41682.7  | Detected | 51136.8  | Detected   | 51394.4  | Detected   | Tprkb         | 1.260435903 | 1.25411832 | 1.23299115 | 1.2268111 |
| A_55_P2009 | 19.2     | Detected   | 17.3     | Detected | 11.5     | Not Detect | 24.2     | Not Detect | Hlf           | 1.260416667 | 0.59895833 | 1.39884393 | 0.6647399 |
| A_52_P3879 | 7301.9   | Detected   | 6105.6   | Detected | 8267.9   | Detected   | 9202.9   | Detected   | Dctn5         | 1.260343198 | 1.13229433 | 1.50728839 | 1.3541503 |
| A_55_P2083 | 8971.1   | Detected   | 6147.2   | Detected | 8068.1   | Detected   | 11306.4  | Detected   | Sec16a        | 1.260313674 | 0.89934345 | 1.83927642 | 1.3124837 |
| A_55_P1961 | 56513.8  | Detected   | 69429.8  | Detected | 78870.2  | Detected   | 71222.2  | Detected   | Uqcr11        | 1.260262095 | 1.39559187 | 1.025816   | 1.1359704 |
| A_51_P2424 | 3781.5   | Detected   | 4007     | Detected | 2348.8   | Detected   | 4765.6   | Detected   | Micall1       | 1.260240645 | 0.62112918 | 1.18931869 | 0.5861742 |
| A_55_P1974 | 22548.9  | Detected   | 22038.3  | Detected | 26833.5  | Detected   | 28416.9  | Detected   | Ptges         | 1.260234424 | 1.1900137  | 1.28943249 | 1.2175848 |
| A_52_P9816 | 433.6    | Detected   | 380.6    | Detected | 641.4    | Detected   | 546.4    | Detected   | Zfp874a       | 1.260147601 | 1.47924354 | 1.43562796 | 1.6852338 |
| A_55_P2172 | 57.3     | Detected   | 58.4     | Detected | 68.7     | Detected   | 72.2     | Detected   | Nrgn          | 1.260034904 | 1.19895288 | 1.23630137 | 1.1763699 |

|            |                   |                   |                   |                   |                |             |            |            |           |
|------------|-------------------|-------------------|-------------------|-------------------|----------------|-------------|------------|------------|-----------|
| A_52_P6321 | 662 Detected      | 675.9 Detected    | 694.7 Detected    | 834.1 Detected    | Nfx1           | 1.259969789 | 1.04939577 | 1.23405829 | 1.0278148 |
| A_66_P1205 | 14480.5 Detected  | 11642.5 Detected  | 17441.6 Detected  | 18244.6 Detected  | Plcd3          | 1.259942682 | 1.2044888  | 1.56706893 | 1.4980975 |
| A_55_P2133 | 14218.1 Detected  | 12510.2 Detected  | 16834.2 Detected  | 17913.8 Detected  | Wwc1           | 1.259929245 | 1.18399786 | 1.43193554 | 1.345638  |
| A_55_P2087 | 22.7 Detected     | 43.4 Detected     | 31.6 Detected     | 28.6 Not Detect   | Gm4022         | 1.259911894 | 1.39207048 | 0.65898618 | 0.7281106 |
| A_51_P2785 | 15099.8 Detected  | 19326.6 Detected  | 13264.9 Detected  | 19023.1 Detected  | Tecr           | 1.259824633 | 0.87848183 | 0.98429625 | 0.6863546 |
| A_55_P2172 | 2174.3 Detected   | 2184.7 Detected   | 1769.6 Detected   | 2739.2 Detected   | Mfn2           | 1.259807754 | 0.81387113 | 1.25381059 | 0.8099968 |
| A_51_P2793 | 2808.5 Detected   | 2196.9 Detected   | 4432.3 Detected   | 3538.1 Detected   | Acbd5          | 1.259782802 | 1.5781734  | 1.61049661 | 2.0175247 |
| A_55_P2341 | 82 Detected       | 73.2 Detected     | 84.3 Detected     | 103.3 Detected    | 4930529I22Rik  | 1.259756098 | 1.02804878 | 1.41120219 | 1.1516393 |
| A_55_P1956 | 1401.1 Detected   | 1433.6 Detected   | 1302.8 Detected   | 1764.9 Detected   | 6030458C11Rik  | 1.25965313  | 0.92984084 | 1.23109654 | 0.9087612 |
| A_55_P2137 | 1454.2 Detected   | 1783.3 Detected   | 1359.7 Detected   | 1831.7 Detected   | Mettl20        | 1.259592903 | 0.93501582 | 1.02714069 | 0.7624628 |
| A_55_P2154 | 14253.8 Detected  | 10452.4 Detected  | 19000.2 Detected  | 17953.7 Detected  | Gfpt1          | 1.259572886 | 1.3329919  | 1.71766293 | 1.8177835 |
| A_55_P2003 | 853.5 Detected    | 456.2 Detected    | 595.8 Detected    | 1075 Detected     | Stxbp6         | 1.259519625 | 0.69806678 | 2.35642262 | 1.3060061 |
| A_55_P2063 | 18.5 Detected     | 24 Detected       | 14.5 Not Detect   | 23.3 Not Detect   | Aldoat2        | 1.259459459 | 0.78378378 | 0.97083333 | 0.6041667 |
| A_55_P2026 | 172201.7 Detected | 221467.4 Detected | 184710.4 Detected | 216878.3 Detected | Gm4802         | 1.259443432 | 1.07263982 | 0.97927867 | 0.8340297 |
| A_51_P2988 | 5584.2 Detected   | 6512.8 Detected   | 5837.3 Detected   | 7032.9 Detected   | Pcbd2          | 1.259428387 | 1.04532431 | 1.07985813 | 0.8962812 |
| A_55_P2050 | 16335.6 Detected  | 16718.1 Detected  | 16424.9 Detected  | 20573.1 Detected  | Fcrl5          | 1.259402777 | 1.00546659 | 1.2305884  | 0.9824621 |
| A_52_P2500 | 173.1 Detected    | 149 Detected      | 140.5 Detected    | 218 Detected      | Ticrr          | 1.259387637 | 0.81166956 | 1.46308725 | 0.942953  |
| A_66_P1115 | 34.7 Detected     | 19.4 Detected     | 27 Detected       | 43.7 Detected     | LOC101055727   | 1.259365994 | 0.77809798 | 2.25257732 | 1.3917526 |
| A_55_P2079 | 49906 Detected    | 74026.2 Detected  | 49020.7 Detected  | 62847 Detected    | Kars           | 1.259307498 | 0.98226065 | 0.8489832  | 0.6622074 |
| A_55_P2085 | 8.1 Not Detect    | 20.7 Detected     | 6.7 Not Detect    | 10.2 Not Detect   | Kif26a         | 1.259259259 | 0.82716049 | 0.49275362 | 0.3236715 |
| A_51_P4753 | 611 Detected      | 1114.9 Detected   | 1008.2 Detected   | 769.3 Detected    | Chrnbl         | 1.25908347  | 1.65008183 | 0.69001704 | 0.9042963 |
| A_66_P1324 | 47.1 Detected     | 33 Detected       | 46.1 Detected     | 59.3 Detected     | Asic3          | 1.259023355 | 0.97876858 | 1.7969697  | 1.3969697 |
| A_51_P1341 | 97.3 Detected     | 86.3 Detected     | 74.7 Detected     | 122.5 Detected    | Cyp2c70        | 1.258992806 | 0.76772867 | 1.41946698 | 0.8655852 |
| A_55_P2171 | 132.9 Detected    | 113.5 Detected    | 119.4 Detected    | 167.3 Detected    | Dnmt3aos       | 1.258841234 | 0.89841986 | 1.47400881 | 1.0519824 |
| A_66_P1349 | 85 Detected       | 88.2 Detected     | 68 Detected       | 107 Detected      | Gm410          | 1.258823529 | 0.8        | 1.21315193 | 0.7709751 |
| A_66_P1347 | 417.3 Detected    | 604.8 Detected    | 401.4 Detected    | 525.3 Detected    | 2610044O15Rik8 | 1.258806614 | 0.96189792 | 0.86855159 | 0.6636905 |
| A_55_P1955 | 105.1 Detected    | 165.6 Detected    | 176.6 Detected    | 132.3 Detected    | Bbs1           | 1.258801142 | 1.68030447 | 0.79891304 | 1.0664251 |
| A_51_P4320 | 22.8 Detected     | 28.3 Detected     | 24.4 Detected     | 28.7 Not Detect   | Gm9744         | 1.25877193  | 1.07017544 | 1.01413428 | 0.8621908 |
| A_55_P2035 | 34.4 Detected     | 23 Detected       | 19.5 Detected     | 43.3 Not Detect   | Fgf7           | 1.25872093  | 0.56686047 | 1.8826087  | 0.8478261 |
| A_66_P1066 | 226.5 Detected    | 216.9 Detected    | 217.1 Detected    | 285.1 Detected    | Ffar3          | 1.258719647 | 0.9584989  | 1.31443061 | 1.0009221 |
| A_55_P2154 | 720.5 Detected    | 661.9 Detected    | 722.3 Detected    | 906.9 Detected    | 2810006K23Rik  | 1.25870923  | 1.00249827 | 1.37014655 | 1.0912525 |
| A_55_P2124 | 1484.8 Detected   | 1498.8 Detected   | 1059.8 Detected   | 1868.9 Detected   | Grhl1          | 1.258688039 | 0.71376616 | 1.24693088 | 0.707099  |
| A_51_P2764 | 84.3 Detected     | 74.1 Detected     | 57.7 Detected     | 106.1 Detected    | Tigd5          | 1.258600237 | 0.68446026 | 1.43184885 | 0.7786775 |
| A_55_P2036 | 7619.5 Detected   | 7617.1 Detected   | 6660.7 Detected   | 9589.7 Detected   | Fbxl12os       | 1.258573397 | 0.87416497 | 1.25896995 | 0.8744404 |
| A_51_P1521 | 143.1 Detected    | 103.2 Detected    | 100.7 Detected    | 180.1 Detected    | Pias3          | 1.258560447 | 0.7037037  | 1.74515504 | 0.9757752 |
| A_51_P1500 | 236.7 Detected    | 249.8 Detected    | 220.1 Detected    | 297.9 Detected    | Rrp7a          | 1.258555133 | 0.92986903 | 1.19255404 | 0.8811049 |
| A_55_P2106 | 61.5 Detected     | 72 Detected       | 55.4 Detected     | 77.4 Detected     | Scn2a1         | 1.258536585 | 0.90081301 | 1.075      | 0.7694444 |
| A_55_P2279 | 240.8 Detected    | 233.4 Detected    | 256 Detected      | 303 Detected      | 5730414N17Rik  | 1.258305648 | 1.06312292 | 1.29820051 | 1.0968295 |
| A_66_P1062 | 1381.6 Detected   | 1807.5 Detected   | 1303.5 Detected   | 1738.4 Detected   | Vps54          | 1.258251303 | 0.94347134 | 0.9617704  | 0.7211618 |
| A_51_P2147 | 98 Detected       | 85.7 Detected     | 93.4 Detected     | 123.3 Detected    | Atp6v1e2       | 1.258163265 | 0.95306122 | 1.43873979 | 1.0898483 |

|            |          |          |          |          |          |          |          |          |               |             |            |            |           |
|------------|----------|----------|----------|----------|----------|----------|----------|----------|---------------|-------------|------------|------------|-----------|
| A_55_P2072 | 527.2    | Detected | 403.3    | Detected | 437.2    | Detected | 663.3    | Detected | Vsig10        | 1.258156297 | 0.8292868  | 1.64468138 | 1.0840565 |
| A_51_P2914 | 147463.7 | Detected | 194267.4 | Detected | 175762.5 | Detected | 185531.3 | Detected | Gm6498        | 1.258148955 | 1.1919035  | 0.95503054 | 0.9047452 |
| A_52_P6154 | 1906     | Detected | 1275.1   | Detected | 1940.5   | Detected | 2397.8   | Detected | Tpra1         | 1.258027282 | 1.01810073 | 1.88047996 | 1.5218414 |
| A_55_P2142 | 514.3    | Detected | 524.6    | Detected | 820.9    | Detected | 646.9    | Detected | Serpina3h     | 1.257826171 | 1.59615011 | 1.23313    | 1.5648113 |
| A_52_P1025 | 3883.9   | Detected | 3937.9   | Detected | 4714.3   | Detected | 4885.2   | Detected | Dars2         | 1.257807874 | 1.21380571 | 1.24055969 | 1.1971609 |
| A_52_P2144 | 685.9    | Detected | 775.3    | Detected | 813.8    | Detected | 862.7    | Detected | Ccdc47        | 1.257763522 | 1.18647033 | 1.11273056 | 1.0496582 |
| A_55_P2065 | 1696.5   | Detected | 1573     | Detected | 1363.4   | Detected | 2133.7   | Detected | D430042O09Rik | 1.257707044 | 0.80365458 | 1.35645264 | 0.8667514 |
| A_66_P1080 | 25740.2  | Detected | 28680.5  | Detected | 23635.1  | Detected | 32373.4  | Detected | Heatr1        | 1.257698075 | 0.91821742 | 1.12875996 | 0.8240826 |
| A_55_P2220 | 250.5    | Detected | 303.5    | Detected | 190.7    | Detected | 315      | Detected | D230035N22Rik | 1.25748503  | 0.76127745 | 1.03789127 | 0.6283361 |
| A_55_P1957 | 1987     | Detected | 2083.4   | Detected | 2162.1   | Detected | 2498.6   | Detected | Atad2b        | 1.257473578 | 1.0881228  | 1.19928962 | 1.0377748 |
| A_51_P1349 | 7409.7   | Detected | 5562.7   | Detected | 8235.1   | Detected | 9317.5   | Detected | Shkbp1        | 1.257473312 | 1.11139452 | 1.67499596 | 1.4804142 |
| A_55_P2167 | 47       | Detected | 49.6     | Detected | 48.6     | Detected | 59.1     | Detected | Cdk15         | 1.257446809 | 1.03404255 | 1.19153226 | 0.9798387 |
| A_55_P1986 | 19624.7  | Detected | 19510.2  | Detected | 20208.9  | Detected | 24674.5  | Detected | Def8          | 1.257318583 | 1.02976861 | 1.26469744 | 1.035812  |
| A_52_P3924 | 2749.7   | Detected | 1852.1   | Detected | 3379.1   | Detected | 3457     | Detected | Hbp1          | 1.257228061 | 1.2288977  | 1.86652988 | 1.8244695 |
| A_55_P2180 | 128.3    | Detected | 144.6    | Detected | 126.3    | Detected | 161.3    | Detected | Zfp740        | 1.257209665 | 0.98441154 | 1.11549101 | 0.873444  |
| A_55_P2015 | 5178.8   | Detected | 4448.1   | Detected | 4437.6   | Detected | 6510.2   | Detected | Plekha1       | 1.257086584 | 0.85687804 | 1.4635912  | 0.9976394 |
| A_55_P2108 | 4525.9   | Detected | 4665.8   | Detected | 7217.1   | Detected | 5688.9   | Detected | Tlcd1         | 1.256965465 | 1.59462206 | 1.21927644 | 1.5468087 |
| A_51_P1373 | 11705    | Detected | 5718.4   | Detected | 15367    | Detected | 14712.1  | Detected | Cdh1          | 1.256907305 | 1.31285775 | 2.57276511 | 2.6872902 |
| A_55_P2043 | 8044.9   | Detected | 8525.6   | Detected | 9498.6   | Detected | 10111.5  | Detected | Aes           | 1.256883243 | 1.18069833 | 1.18601623 | 1.1141269 |
| A_55_P1992 | 14569    | Detected | 16387.7  | Detected | 12460.3  | Detected | 18311.1  | Detected | Gyg           | 1.256853593 | 0.85526117 | 1.11736851 | 0.7603446 |
| A_55_P2042 | 121.9    | Detected | 601.7    | Detected | 36.2     | Detected | 153.2    | Detected | Gbp11         | 1.256767842 | 0.29696473 | 0.25461193 | 0.0601629 |
| A_55_P2080 | 440.9    | Detected | 387      | Detected | 582.6    | Detected | 554.1    | Detected | BC003965      | 1.256747562 | 1.32138807 | 1.43178295 | 1.5054264 |
| A_52_P1280 | 123397.2 | Detected | 170367.7 | Detected | 148082.8 | Detected | 155077.1 | Detected | Gm5069        | 1.256731109 | 1.20004992 | 0.91024942 | 0.8691953 |
| A_55_P2221 | 299.8    | Detected | 278.6    | Detected | 228.8    | Detected | 376.7    | Detected | 4930421J07Rik | 1.256504336 | 0.76317545 | 1.35211773 | 0.8212491 |
| A_51_P2089 | 50.3     | Detected | 58.5     | Detected | 47.8     | Detected | 63.2     | Detected | Pgm3          | 1.256461233 | 0.95029821 | 1.08034188 | 0.817094  |
| A_52_P3704 | 6771.7   | Detected | 8401.2   | Detected | 7996.5   | Detected | 8508.1   | Detected | Riok3         | 1.256420101 | 1.18087039 | 1.01272437 | 0.9518283 |
| A_51_P5210 | 50.7     | Detected | 62.6     | Detected | 50.5     | Detected | 63.7     | Detected | Fam63a        | 1.256410256 | 0.99605523 | 1.01757188 | 0.8067093 |
| A_55_P1966 | 206399.3 | Detected | 219615.1 | Detected | 202638.3 | Detected | 259321.9 | Detected | Bpifc         | 1.256408815 | 0.98177804 | 1.18080178 | 0.9226975 |
| A_55_P1981 | 39733.5  | Detected | 42029.5  | Detected | 46547.7  | Detected | 49916.8  | Detected | Park7         | 1.256290032 | 1.1714976  | 1.18766105 | 1.1075007 |
| A_55_P2083 | 2574.2   | Detected | 2905.3   | Detected | 3702.4   | Detected | 3233.7   | Detected | Tatdn3        | 1.2561961   | 1.43827208 | 1.1130348  | 1.2743607 |
| A_55_P2086 | 6213.9   | Detected | 5692     | Detected | 9128.7   | Detected | 7805.8   | Detected | Rgl3          | 1.256183717 | 1.46907739 | 1.37136332 | 1.6037772 |
| A_55_P2028 | 1570.5   | Detected | 1384.7   | Detected | 1327.7   | Detected | 1972.8   | Detected | AW551984      | 1.256160458 | 0.84539955 | 1.42471293 | 0.9588358 |
| A_52_P1026 | 2847.4   | Detected | 2555.6   | Detected | 2630.7   | Detected | 3576.5   | Detected | Tbc1d8b       | 1.256058158 | 0.92389548 | 1.39947566 | 1.0293864 |
| A_51_P1489 | 5993.6   | Detected | 8139.7   | Detected | 7513     | Detected | 7528.2   | Detected | Dhx36         | 1.256039776 | 1.25350374 | 0.92487438 | 0.923007  |
| A_55_P2036 | 10462.4  | Detected | 11027.1  | Detected | 10265.5  | Detected | 13141.1  | Detected | Cpsf3l        | 1.256031121 | 0.98118023 | 1.19170952 | 0.9309338 |
| A_55_P1963 | 3796.1   | Detected | 2737.2   | Detected | 2895.3   | Detected | 4767.9   | Detected | Mib2          | 1.255999579 | 0.76270383 | 1.74188952 | 1.0577598 |
| A_52_P2843 | 10034    | Detected | 9199.1   | Detected | 11560.8  | Detected | 12601.8  | Detected | Smim20        | 1.255909906 | 1.15216265 | 1.36989488 | 1.2567316 |
| A_66_P1075 | 122.7    | Detected | 77.6     | Detected | 142.3    | Detected | 154.1    | Detected | Gm9958        | 1.25590872  | 1.1597392  | 1.98582474 | 1.8337629 |
| A_51_P1334 | 172      | Detected | 159.2    | Detected | 164.1    | Detected | 216      | Detected | Nck2          | 1.255813953 | 0.95406977 | 1.35678392 | 1.0307789 |
| A_55_P1992 | 5839.9   | Detected | 7183.6   | Detected | 6756.2   | Detected | 7333.7   | Detected | Tars2         | 1.255792051 | 1.15690337 | 1.02089482 | 0.9405034 |

|            |         |          |         |          |         |            |         |            |                |             |            |            |           |
|------------|---------|----------|---------|----------|---------|------------|---------|------------|----------------|-------------|------------|------------|-----------|
| A_55_P2087 | 61810.7 | Detected | 62657.6 | Detected | 55782.9 | Detected   | 77619.4 | Detected   | Rapsn          | 1.255759925 | 0.90247967 | 1.23878668 | 0.8902815 |
| A_55_P1957 | 3030.2  | Detected | 2742.4  | Detected | 3355.2  | Detected   | 3805.2  | Detected   | Caskin2        | 1.255758696 | 1.10725365 | 1.38754376 | 1.2234539 |
| A_55_P1984 | 39.5    | Detected | 31.6    | Detected | 27.7    | Detected   | 49.6    | Detected   | Gm9948         | 1.255696203 | 0.70126582 | 1.56962025 | 0.8765823 |
| A_55_P2019 | 2929    | Detected | 3051.1  | Detected | 3513.4  | Detected   | 3677.9  | Detected   | Ythdf3         | 1.255684534 | 1.19952202 | 1.20543411 | 1.1515191 |
| A_51_P1483 | 7275.6  | Detected | 5814.5  | Detected | 7721    | Detected   | 9135.3  | Detected   | Zfp710         | 1.255607785 | 1.06121832 | 1.57112391 | 1.3278872 |
| A_51_P1613 | 1841.6  | Detected | 1433.5  | Detected | 2119.8  | Detected   | 2312.2  | Detected   | Sesn2          | 1.255538662 | 1.15106429 | 1.61297524 | 1.4787583 |
| A_55_P1988 | 3674.2  | Detected | 4357.1  | Detected | 3046.4  | Detected   | 4613    | Detected   | Mlf1ip         | 1.255511404 | 0.82913287 | 1.05873173 | 0.6991806 |
| A_55_P2083 | 1665.6  | Detected | 1941.1  | Detected | 1479.7  | Detected   | 2091    | Detected   | BC023829       | 1.255403458 | 0.88838857 | 1.07722425 | 0.7622997 |
| A_55_P2186 | 26619.7 | Detected | 38801.8 | Detected | 25802.1 | Detected   | 33417.9 | Detected   | Rbmxl1         | 1.255382292 | 0.9692859  | 0.86124613 | 0.6649717 |
| A_55_P2018 | 9695.9  | Detected | 12310.1 | Detected | 11271   | Detected   | 12171.2 | Detected   | Ptges3         | 1.255293475 | 1.16245011 | 0.98871658 | 0.9155896 |
| A_52_P5233 | 42.7    | Detected | 34.7    | Detected | 30.8    | Detected   | 53.6    | Detected   | Psapl1         | 1.255269321 | 0.72131148 | 1.54466859 | 0.8876081 |
| A_55_P2034 | 2786.5  | Detected | 3310.3  | Detected | 2805.9  | Detected   | 3497.8  | Detected   | Ddx19a         | 1.255266463 | 1.00696214 | 1.05664139 | 0.8476271 |
| A_55_P1978 | 281.7   | Detected | 251.3   | Detected | 244.9   | Detected   | 353.6   | Detected   | Wasf2          | 1.255236067 | 0.86936457 | 1.40708317 | 0.9745324 |
| A_55_P2140 | 23.9    | Detected | 41.4    | Detected | 37      | Detected   | 30      | Not Detect | Gm5129         | 1.255230126 | 1.54811715 | 0.72463768 | 0.8937198 |
| A_52_P6169 | 23.9    | Detected | 52.1    | Detected | 13.6    | Not Detect | 30      | Not Detect | 9930111J21Rik2 | 1.255230126 | 0.56903766 | 0.57581574 | 0.2610365 |
| A_55_P2049 | 13184.7 | Detected | 13693.2 | Detected | 11864.4 | Detected   | 16549.2 | Detected   | Aggf1          | 1.255182143 | 0.8998612  | 1.20857068 | 0.8664447 |
| A_55_P2024 | 45227.5 | Detected | 44169.7 | Detected | 46485.6 | Detected   | 56766.1 | Detected   | Sec24c         | 1.255123542 | 1.02781715 | 1.28518192 | 1.0524319 |
| A_55_P2033 | 3047.9  | Detected | 3943.1  | Detected | 3856.9  | Detected   | 3825.3  | Detected   | Med6           | 1.255060862 | 1.26542866 | 0.97012503 | 0.978139  |
| A_55_P2147 | 213.1   | Detected | 243.3   | Detected | 181.9   | Detected   | 267.4   | Detected   | Ttc37          | 1.254809948 | 0.85358986 | 1.09905467 | 0.7476367 |
| A_55_P2155 | 4122.9  | Detected | 4132.2  | Detected | 4023.7  | Detected   | 5173.1  | Detected   | Mafa           | 1.254723617 | 0.97593927 | 1.25189971 | 0.9737428 |
| A_55_P2148 | 1975.9  | Detected | 1521.4  | Detected | 1760.7  | Detected   | 2479.2  | Detected   | Cat            | 1.254719368 | 0.89108761 | 1.62955173 | 1.1572893 |
| A_52_P5651 | 568.5   | Detected | 561.6   | Detected | 482.4   | Detected   | 713.3   | Detected   | Gcfc2          | 1.254705365 | 0.84854881 | 1.27012108 | 0.8589744 |
| A_55_P2038 | 3126.2  | Detected | 3803.1  | Detected | 3537.5  | Detected   | 3922.4  | Detected   | Rps3           | 1.2546862   | 1.13156548 | 1.03136915 | 0.9301622 |
| A_51_P4377 | 11610.9 | Detected | 10778.8 | Detected | 12935.2 | Detected   | 14566.8 | Detected   | 0610031J06Rik  | 1.254579748 | 1.11405662 | 1.35143059 | 1.2000594 |
| A_55_P2070 | 1042    | Detected | 1079.1  | Detected | 1281.3  | Detected   | 1307.2  | Detected   | Emc10          | 1.254510557 | 1.22965451 | 1.21137985 | 1.1873784 |
| A_51_P5066 | 5286.7  | Detected | 4906.2  | Detected | 6351.5  | Detected   | 6631.6  | Detected   | Rpp38          | 1.2543931   | 1.20141109 | 1.35167747 | 1.2945864 |
| A_51_P3637 | 6692.8  | Detected | 8015.1  | Detected | 8398.5  | Detected   | 8395.4  | Detected   | Ap3m1          | 1.25439278  | 1.25485596 | 1.04744794 | 1.0478347 |
| A_55_P2002 | 13586.9 | Detected | 17703.3 | Detected | 15643.2 | Detected   | 17043.2 | Detected   | Bre            | 1.254384738 | 1.15134431 | 0.96271317 | 0.8836319 |
| A_55_P2042 | 5239.4  | Detected | 4920.6  | Detected | 3815.2  | Detected   | 6571.8  | Detected   | Polm           | 1.254303928 | 0.72817498 | 1.33556883 | 0.7753526 |
| A_52_P5302 | 744.4   | Detected | 1250.1  | Detected | 432.5   | Detected   | 933.7   | Detected   | Pim1           | 1.254298764 | 0.58100484 | 0.74690025 | 0.3459723 |
| A_51_P5149 | 2711.5  | Detected | 7473.4  | Detected | 2475.2  | Detected   | 3400.5  | Detected   | Tiparp         | 1.254102895 | 0.91285266 | 0.45501378 | 0.3312013 |
| A_51_P1945 | 61.8    | Detected | 86.9    | Detected | 61.2    | Detected   | 77.5    | Detected   | Alx3           | 1.254045307 | 0.99029126 | 0.89182969 | 0.7042578 |
| A_51_P4063 | 10291.9 | Detected | 9866.4  | Detected | 14191.9 | Detected   | 12905   | Detected   | Maf1           | 1.253898697 | 1.37893878 | 1.30797454 | 1.4384071 |
| A_55_P2055 | 5943.1  | Detected | 5163.3  | Detected | 7394.4  | Detected   | 7451.9  | Detected   | Enpp4          | 1.253874241 | 1.24419916 | 1.44324366 | 1.4321074 |
| A_55_P2262 | 46.5    | Detected | 54.1    | Detected | 49.1    | Detected   | 58.3    | Detected   | 4930563F15Rik  | 1.253763441 | 1.05591398 | 1.07763401 | 0.9075786 |
| A_55_P2126 | 17539.6 | Detected | 15574.2 | Detected | 27005.7 | Detected   | 21990.1 | Detected   | Atxn7I3b       | 1.253740108 | 1.53969874 | 1.41195695 | 1.7340024 |
| A_55_P2051 | 948.6   | Detected | 1167.2  | Detected | 764.7   | Detected   | 1189.2  | Detected   | Gm4146         | 1.253636939 | 0.80613536 | 1.01884853 | 0.6551576 |
| A_55_P1961 | 190.1   | Detected | 201.8   | Detected | 210     | Detected   | 238.3   | Detected   | Pou3f1         | 1.253550763 | 1.10468175 | 1.18087215 | 1.0406343 |
| A_55_P2085 | 218.5   | Detected | 166.8   | Detected | 189.9   | Detected   | 273.9   | Detected   | Nxph4          | 1.253546911 | 0.86910755 | 1.64208633 | 1.1384892 |
| A_52_P5196 | 303.3   | Detected | 271.6   | Detected | 361.3   | Detected   | 380.2   | Detected   | Abca5          | 1.253544346 | 1.19122981 | 1.39985272 | 1.3302651 |

|            |          |          |          |            |          |            |          |            |               |             |            |            |           |
|------------|----------|----------|----------|------------|----------|------------|----------|------------|---------------|-------------|------------|------------|-----------|
| A_51_P1045 | 3763.6   | Detected | 3439.7   | Detected   | 3886.9   | Detected   | 4717.4   | Detected   | Atrip         | 1.253427569 | 1.03276119 | 1.37145681 | 1.1300113 |
| A_52_P5921 | 3912.3   | Detected | 3903.7   | Detected   | 4373.5   | Detected   | 4903.7   | Detected   | Fam21         | 1.253405925 | 1.11788462 | 1.25616723 | 1.1203474 |
| A_55_P2148 | 1566.9   | Detected | 1625.3   | Detected   | 1726.9   | Detected   | 1963.9   | Detected   | 5830403L16Rik | 1.25336652  | 1.10211245 | 1.20833077 | 1.0625115 |
| A_55_P2159 | 30.4     | Detected | 48.4     | Detected   | 33.5     | Detected   | 38.1     | Not Detect | Tas2r131      | 1.253289474 | 1.10197368 | 0.78719008 | 0.6921488 |
| A_55_P2010 | 1969.7   | Detected | 1902.4   | Detected   | 2335.2   | Detected   | 2468.2   | Detected   | Zdhhc6        | 1.253084226 | 1.18556125 | 1.29741379 | 1.2275021 |
| A_55_P2083 | 28722.9  | Detected | 30312.1  | Detected   | 35077.4  | Detected   | 35989.9  | Detected   | Snf8          | 1.253003701 | 1.22123462 | 1.18731134 | 1.1572078 |
| A_55_P2090 | 3346.1   | Detected | 2936.4   | Detected   | 2927.3   | Detected   | 4192.6   | Detected   | Tbc1d8b       | 1.252981082 | 0.87483937 | 1.42780275 | 0.996901  |
| A_51_P4652 | 983.3    | Detected | 1094.1   | Detected   | 1144.1   | Detected   | 1231.8   | Detected   | Mettl17       | 1.252720431 | 1.16353097 | 1.12585687 | 1.0456997 |
| A_65_P2078 | 46.7     | Detected | 41.7     | Detected   | 19       | Detected   | 58.5     | Detected   | Vps8          | 1.25267666  | 0.40685225 | 1.4028777  | 0.4556355 |
| A_55_P2099 | 131      | Detected | 125.3    | Detected   | 94.2     | Detected   | 164.1    | Detected   | Ect2          | 1.252671756 | 0.71908397 | 1.30965682 | 0.7517957 |
| A_52_P2662 | 19       | Detected | 17.8     | Not Detect | 21.4     | Detected   | 23.8     | Not Detect | Fam92b        | 1.252631579 | 1.12631579 | 1.33707865 | 1.2022472 |
| A_51_P4434 | 9870.5   | Detected | 10625.3  | Detected   | 12697.5  | Detected   | 12363.7  | Detected   | Bccip         | 1.252591054 | 1.286409   | 1.1636095  | 1.1950251 |
| A_55_P1976 | 19.4     | Detected | 18       | Not Detect | 20.1     | Detected   | 24.3     | Not Detect | Pnp2          | 1.25257732  | 1.03608247 | 1.35       | 1.1166667 |
| A_55_P1999 | 17258.3  | Detected | 17198.5  | Detected   | 15706.4  | Detected   | 21616.4  | Detected   | Gm10318       | 1.252521975 | 0.91007805 | 1.25687705 | 0.9132424 |
| A_55_P2081 | 161.2    | Detected | 131.3    | Detected   | 141.1    | Detected   | 201.9    | Detected   | Cln6          | 1.25248139  | 0.87531017 | 1.53769992 | 1.0746382 |
| A_55_P2183 | 103      | Detected | 113.2    | Detected   | 67.5     | Detected   | 129      | Detected   | Tbc1d2        | 1.252427184 | 0.65533981 | 1.13957597 | 0.5962898 |
| A_51_P4950 | 2858.4   | Detected | 3784.1   | Detected   | 1736.8   | Detected   | 3579.4   | Detected   | Rab15         | 1.252239015 | 0.60761265 | 0.94590524 | 0.4589731 |
| A_52_P1724 | 1049.7   | Detected | 986.9    | Detected   | 1280.9   | Detected   | 1314.4   | Detected   | A230046K03Rik | 1.252167286 | 1.22025341 | 1.3318472  | 1.2979025 |
| A_66_P1081 | 1424.5   | Detected | 1471.3   | Detected   | 1503.4   | Detected   | 1783.6   | Detected   | Lin52         | 1.252088452 | 1.05538786 | 1.21226127 | 1.0218174 |
| A_52_P2365 | 180.5    | Detected | 163.6    | Detected   | 168.5    | Detected   | 226      | Detected   | 4930431P19Rik | 1.252077562 | 0.93351801 | 1.38141809 | 1.0299511 |
| A_51_P3005 | 158.7    | Detected | 156.7    | Detected   | 187.8    | Detected   | 198.7    | Detected   | Cox6b2        | 1.252047889 | 1.18336484 | 1.26802808 | 1.1984684 |
| A_51_P2432 | 2511.6   | Detected | 2462.3   | Detected   | 2605.4   | Detected   | 3144.5   | Detected   | Zfp574        | 1.251990763 | 1.03734671 | 1.27705804 | 1.0581164 |
| A_51_P4757 | 37.7     | Detected | 39.2     | Detected   | 32.7     | Detected   | 47.2     | Not Detect | Zfp689        | 1.25198939  | 0.86737401 | 1.20408163 | 0.8341837 |
| A_55_P2055 | 938.2    | Detected | 886.9    | Detected   | 877.4    | Detected   | 1174.6   | Detected   | Airn          | 1.251971861 | 0.93519505 | 1.32438832 | 0.9892885 |
| A_52_P1179 | 10441.8  | Detected | 13848.6  | Detected   | 14002.1  | Detected   | 13072.2  | Detected   | Fam173b       | 1.25191059  | 1.34096612 | 0.94393657 | 1.0110842 |
| A_55_P1980 | 8432.1   | Detected | 7935.6   | Detected   | 7089.8   | Detected   | 10556.2  | Detected   | Tbc1d9b       | 1.251906405 | 0.84081071 | 1.33023338 | 0.893417  |
| A_55_P2437 | 3332     | Detected | 3901.8   | Detected   | 2858.9   | Detected   | 4171.3   | Detected   | Nae1          | 1.251890756 | 0.85801321 | 1.06907069 | 0.7327131 |
| A_52_P5619 | 3099.6   | Detected | 3101.1   | Detected   | 2686.6   | Detected   | 3879.9   | Detected   | Ncor1         | 1.25174216  | 0.866757   | 1.25113669 | 0.8663378 |
| A_55_P2007 | 227706.8 | Detected | 246792.2 | Detected   | 241717.3 | Detected   | 285028.1 | Detected   | Aldoa         | 1.25173293  | 1.06152869 | 1.15493156 | 0.9794365 |
| A_51_P2799 | 193.1    | Detected | 178.7    | Detected   | 189.3    | Detected   | 241.7    | Detected   | E330017A01Rik | 1.251683066 | 0.98032108 | 1.35254617 | 1.0593173 |
| A_66_P1395 | 7444.3   | Detected | 7334.9   | Detected   | 7246.9   | Detected   | 9317.9   | Detected   | Helz          | 1.251682495 | 0.97348307 | 1.27035133 | 0.9880026 |
| A_55_P1953 | 93.8     | Detected | 126.8    | Detected   | 119.2    | Detected   | 117.4    | Detected   | Uchl3         | 1.251599147 | 1.27078891 | 0.92586751 | 0.9400631 |
| A_55_P2081 | 110.9    | Detected | 112.5    | Detected   | 103.1    | Detected   | 138.8    | Detected   | Galp          | 1.251577998 | 0.92966637 | 1.23377778 | 0.9164444 |
| A_51_P3968 | 3567     | Detected | 2056.4   | Detected   | 1073.6   | Detected   | 4464.3   | Detected   | Fam122a       | 1.251555929 | 0.30098122 | 2.17092978 | 0.5220774 |
| A_51_P5081 | 15867.2  | Detected | 10593.1  | Detected   | 18185.9  | Detected   | 19858.6  | Detected   | Dscr3         | 1.251550368 | 1.14613164 | 1.87467314 | 1.7167685 |
| A_51_P2488 | 16.3     | Detected | 8.7      | Not Detect | 7        | Not Detect | 20.4     | Not Detect | Fam212a       | 1.251533742 | 0.42944785 | 2.34482759 | 0.8045977 |
| A_55_P2107 | 3924.9   | Detected | 2184.7   | Detected   | 5485.8   | Detected   | 4912.1   | Detected   | Gm6484        | 1.251522332 | 1.39769166 | 2.24840939 | 2.5110084 |
| A_55_P2121 | 8485.2   | Detected | 4919.3   | Detected   | 7838.4   | Detected   | 10618.7  | Detected   | Mapk3         | 1.251437798 | 0.92377316 | 2.15857947 | 1.5933974 |
| A_51_P2816 | 159.5    | Detected | 166.5    | Detected   | 141.2    | Detected   | 199.6    | Detected   | Olf609        | 1.251410658 | 0.88526646 | 1.1987988  | 0.848048  |
| A_55_P1981 | 9908.1   | Detected | 8680     | Detected   | 9392.6   | Detected   | 12397.9  | Detected   | Trafd1        | 1.251289349 | 0.94797186 | 1.42832949 | 1.0820968 |

|            |          |            |          |          |          |            |          |            |               |             |            |            |           |
|------------|----------|------------|----------|----------|----------|------------|----------|------------|---------------|-------------|------------|------------|-----------|
| A_51_P1505 | 5173.5   | Detected   | 5943.5   | Detected | 5650.9   | Detected   | 6473.2   | Detected   | Mgat2         | 1.251222577 | 1.09227795 | 1.08912257 | 0.9507697 |
| A_55_P2046 | 61.7     | Detected   | 65.9     | Detected | 48.2     | Detected   | 77.2     | Detected   | Mpped1        | 1.251215559 | 0.78119935 | 1.17147193 | 0.7314112 |
| A_55_P2164 | 42.2     | Detected   | 28.3     | Detected | 56.9     | Detected   | 52.8     | Not Detect | Pik3c2b       | 1.251184834 | 1.34834123 | 1.86572438 | 2.0106007 |
| A_55_P2005 | 64.9     | Detected   | 58.7     | Detected | 65.1     | Detected   | 81.2     | Detected   | Mfap4         | 1.251155624 | 1.00308166 | 1.38330494 | 1.109029  |
| A_55_P2368 | 130.2    | Detected   | 146.2    | Detected | 129.3    | Detected   | 162.9    | Detected   | 1110002J07Rik | 1.251152074 | 0.99308756 | 1.11422709 | 0.8844049 |
| A_51_P2940 | 1622     | Detected   | 1389.7   | Detected | 1677.9   | Detected   | 2029.3   | Detected   | Ticam1        | 1.251109741 | 1.03446363 | 1.46024322 | 1.2073829 |
| A_55_P2088 | 172386.6 | Detected   | 227642.7 | Detected | 215590.7 | Detected   | 215671.1 | Detected   | Gapdh         | 1.251089702 | 1.25062331 | 0.94741057 | 0.9470574 |
| A_55_P1987 | 683.2    | Detected   | 629.4    | Detected | 895.4    | Detected   | 854.7    | Detected   | Tnrc6b        | 1.25102459  | 1.31059719 | 1.35795996 | 1.4226247 |
| A_55_P2071 | 725.7    | Detected   | 716.5    | Detected | 673.3    | Detected   | 907.8    | Detected   | Ppara         | 1.250930136 | 0.92779385 | 1.26699232 | 0.9397069 |
| A_66_P1405 | 399      | Detected   | 421.9    | Detected | 429.7    | Detected   | 499.1    | Detected   | Sdk1          | 1.250877193 | 1.07694236 | 1.18298175 | 1.0184878 |
| A_55_P2026 | 3993.3   | Detected   | 4572     | Detected | 5724.8   | Detected   | 4995     | Detected   | Tfam          | 1.250845166 | 1.43360128 | 1.09251969 | 1.2521435 |
| A_55_P1955 | 10970.4  | Detected   | 8712.4   | Detected | 11248.7  | Detected   | 13721.8  | Detected   | Med15         | 1.250802159 | 1.02536826 | 1.5749736  | 1.2911138 |
| A_55_P2186 | 31636    | Detected   | 46124.6  | Detected | 30762    | Detected   | 39570.3  | Detected   | Rbmx1         | 1.250799722 | 0.97237325 | 0.85790012 | 0.6669326 |
| A_55_P2124 | 128      | Detected   | 92.9     | Detected | 186      | Detected   | 160.1    | Detected   | Epm2aip1      | 1.25078125  | 1.453125   | 1.72335845 | 2.0021529 |
| A_55_P2041 | 11424.4  | Detected   | 9824.6   | Detected | 12079.2  | Detected   | 14287.7  | Detected   | Arhgef1       | 1.25063023  | 1.05731592 | 1.45427804 | 1.2294852 |
| A_55_P1989 | 97706.6  | Detected   | 111908   | Detected | 128412.4 | Detected   | 122177.1 | Detected   | Gm4963        | 1.250448793 | 1.31426536 | 1.09176377 | 1.1474819 |
| A_55_P2084 | 62.3     | Detected   | 41.7     | Detected | 42.4     | Detected   | 77.9     | Detected   | Asb3          | 1.250401284 | 0.68057785 | 1.86810552 | 1.0167866 |
| A_55_P2226 | 62.7     | Detected   | 63.3     | Detected | 68.8     | Detected   | 78.4     | Detected   | 1700095A13Rik | 1.250398724 | 1.09728868 | 1.2385466  | 1.0868878 |
| A_51_P4797 | 18154.1  | Detected   | 22640.8  | Detected | 18326.7  | Detected   | 22696.3  | Detected   | Ampd2         | 1.250202434 | 1.00950749 | 1.00245133 | 0.8094546 |
| A_55_P2017 | 510.8    | Detected   | 643      | Detected | 547.2    | Detected   | 638.6    | Detected   | Exog          | 1.250195771 | 1.07126077 | 0.99315708 | 0.8510109 |
| A_55_P1977 | 2353.8   | Detected   | 1852.8   | Detected | 225.7    | Detected   | 2942.6   | Detected   | Zfp629        | 1.250148696 | 0.0958875  | 1.58819085 | 0.1218156 |
| A_52_P2432 | 22316.8  | Detected   | 12542.8  | Detected | 20064.4  | Detected   | 27897.5  | Detected   | Mapk3         | 1.250067214 | 0.89907155 | 2.22418439 | 1.5996747 |
| A_51_P1851 | 9853.4   | Detected   | 11928.2  | Detected | 12022.9  | Detected   | 12317.3  | Detected   | Fkbp4         | 1.250055818 | 1.22017781 | 1.03262018 | 1.0079392 |
| A_52_P3429 | 424.8    | Detected   | 465.1    | Detected | 457      | Detected   | 531      | Detected   | Them6         | 1.25        | 1.07580038 | 1.14168996 | 0.9825844 |
| A_55_P2078 | 7.2      | Not Detect | 23.5     | Detected | 3.2      | Not Detect | 9        | Not Detect | Fbxl13        | 1.25        | 0.44444444 | 0.38297872 | 0.1361702 |
| A_51_P4376 | 3348.9   | Detected   | 3486.9   | Detected | 3516.1   | Detected   | 4186.1   | Detected   | Tulp3         | 1.249992535 | 1.04992684 | 1.20052195 | 1.0083742 |
| A_52_P6153 | 4377.2   | Detected   | 2664.7   | Detected | 7559.6   | Detected   | 5471.2   | Detected   | Hist3h2a      | 1.249931463 | 1.72704012 | 2.05321425 | 2.8369422 |
| A_52_P4640 | 9332.5   | Detected   | 7091.2   | Detected | 8646.4   | Detected   | 11664.5  | Detected   | Atg3          | 1.249879454 | 0.92648272 | 1.64492611 | 1.2193141 |
| A_55_P1965 | 1537.4   | Detected   | 1406.1   | Detected | 980.9    | Detected   | 1921.5   | Detected   | Ddx58         | 1.249837388 | 0.63802524 | 1.36654576 | 0.6976033 |
| A_51_P4443 | 13551.9  | Detected   | 17117.2  | Detected | 11389.4  | Detected   | 16937.3  | Detected   | Acp6          | 1.24980999  | 0.84042828 | 0.9894901  | 0.6653775 |
| A_55_P2116 | 7906.2   | Detected   | 8943     | Detected | 8945.5   | Detected   | 9881.2   | Detected   | Brpf1         | 1.249803951 | 1.1314538  | 1.10490887 | 1.0002795 |
| A_55_P2111 | 673.4    | Detected   | 461.9    | Detected | 810      | Detected   | 841.6    | Detected   | Rogdi         | 1.24977725  | 1.2028512  | 1.8220394  | 1.7536263 |
| A_52_P4569 | 1228.8   | Detected   | 996.2    | Detected | 1301.6   | Detected   | 1535.7   | Detected   | Deaf1         | 1.249755859 | 1.05924479 | 1.54155792 | 1.3065649 |
| A_66_P1175 | 253.2    | Detected   | 223      | Detected | 275.7    | Detected   | 316.4    | Detected   | Sec24a        | 1.249605055 | 1.08886256 | 1.41883408 | 1.2363229 |
| A_55_P2024 | 286.9    | Detected   | 317.8    | Detected | 225.4    | Detected   | 358.5    | Detected   | Mapk6         | 1.249564308 | 0.7856396  | 1.12806797 | 0.7092511 |
| A_51_P4385 | 11191.8  | Detected   | 11836.5  | Detected | 13225.3  | Detected   | 13984.5  | Detected   | Cyb5r1        | 1.249530907 | 1.18169553 | 1.18147256 | 1.117332  |
| A_51_P4396 | 16214    | Detected   | 18633.9  | Detected | 18791.3  | Detected   | 20258.1  | Detected   | Map2k2        | 1.249420254 | 1.15895522 | 1.08716372 | 1.008447  |
| A_55_P2162 | 67442.2  | Detected   | 58245.4  | Detected | 72419.6  | Detected   | 84259.8  | Detected   | Ptms          | 1.249363158 | 1.07380246 | 1.44663441 | 1.2433531 |
| A_55_P2341 | 34.9     | Detected   | 37.9     | Detected | 41.1     | Detected   | 43.6     | Not Detect | Zbtb38        | 1.249283668 | 1.17765043 | 1.15039578 | 1.0844327 |
| A_51_P1486 | 5848.1   | Detected   | 4913.6   | Detected | 5799.1   | Detected   | 7305.5   | Detected   | Dag1          | 1.249209145 | 0.99162121 | 1.48679176 | 1.1802141 |

|            |          |            |         |          |          |            |          |            |               |             |            |            |           |
|------------|----------|------------|---------|----------|----------|------------|----------|------------|---------------|-------------|------------|------------|-----------|
| A_51_P1519 | 10646.7  | Detected   | 9551.1  | Detected | 14352.4  | Detected   | 13299.9  | Detected   | Eif2b5        | 1.249203979 | 1.3480609  | 1.39249929 | 1.502696  |
| A_55_P1969 | 893.3    | Detected   | 982.4   | Detected | 1012.5   | Detected   | 1115.9   | Detected   | D19ErtD737e   | 1.249188403 | 1.13343781 | 1.13589169 | 1.0306393 |
| A_52_P1039 | 1092.4   | Detected   | 1161.2  | Detected | 785.6    | Detected   | 1364.5   | Detected   | Ints8         | 1.249084584 | 0.71915049 | 1.17507751 | 0.6765415 |
| A_55_P1999 | 5514.5   | Detected   | 3743.5  | Detected | 5531.8   | Detected   | 6888     | Detected   | Cep110        | 1.249070632 | 1.00313718 | 1.83998931 | 1.477708  |
| A_55_P2039 | 456.6    | Detected   | 417     | Detected | 456.7    | Detected   | 570.3    | Detected   | Gfra4         | 1.249014455 | 1.00021901 | 1.3676259  | 1.0952038 |
| A_55_P2115 | 5122.2   | Detected   | 5801    | Detected | 4851.3   | Detected   | 6397.6   | Detected   | Rnaseh2a      | 1.248994573 | 0.94711257 | 1.10284434 | 0.8362868 |
| A_55_P2024 | 33475.3  | Detected   | 38004.1 | Detected | 34756.3  | Detected   | 41810.3  | Detected   | Gaa           | 1.248989553 | 1.03826702 | 1.10015235 | 0.9145408 |
| A_55_P1984 | 1385.3   | Detected   | 1340.4  | Detected | 1099.7   | Detected   | 1730.2   | Detected   | Mfn2          | 1.248971342 | 0.79383527 | 1.29080871 | 0.8204267 |
| A_66_P1345 | 60744    | Detected   | 73926.8 | Detected | 53952.4  | Detected   | 75861.5  | Detected   | Anln          | 1.248872317 | 0.88819307 | 1.02617048 | 0.7298084 |
| A_55_P1991 | 696      | Detected   | 861     | Detected | 662      | Detected   | 869.2    | Detected   | Pprc1         | 1.248850575 | 0.95114943 | 1.00952381 | 0.7688734 |
| A_52_P7085 | 1253.9   | Detected   | 1296.7  | Detected | 1434     | Detected   | 1565.9   | Detected   | Tob2          | 1.24882367  | 1.14363187 | 1.20760392 | 1.1058842 |
| A_51_P4706 | 20.1     | Detected   | 23.6    | Detected | 18.6     | Detected   | 25.1     | Not Detect | 2310014L17Rik | 1.248756219 | 0.92537313 | 1.06355932 | 0.7881356 |
| A_55_P2092 | 19.7     | Detected   | 19.1    | Detected | 13.5     | Not Detect | 24.6     | Not Detect | Krtap20-2     | 1.248730964 | 0.68527919 | 1.28795812 | 0.7068063 |
| A_51_P3084 | 310.4    | Detected   | 354.6   | Detected | 301.7    | Detected   | 387.6    | Detected   | 1700094D03Rik | 1.24871134  | 0.97197165 | 1.09306261 | 0.8508178 |
| A_55_P2157 | 48760.8  | Detected   | 51808.5 | Detected | 56619.3  | Detected   | 60886.7  | Detected   | Uqcr10        | 1.248681318 | 1.1611643  | 1.17522607 | 1.0928573 |
| A_55_P1969 | 56.3     | Detected   | 71.8    | Detected | 68.6     | Detected   | 70.3     | Detected   | Pnck          | 1.248667851 | 1.21847247 | 0.97910864 | 0.9554318 |
| A_55_P1970 | 419.1    | Detected   | 365.7   | Detected | 389.2    | Detected   | 523.3    | Detected   | Tmem67        | 1.248628012 | 0.92865665 | 1.43095433 | 1.0642603 |
| A_51_P4239 | 67.6     | Detected   | 69.3    | Detected | 76.2     | Detected   | 84.4     | Detected   | Cnga2         | 1.24852071  | 1.12721893 | 1.21789322 | 1.0995671 |
| A_52_P5577 | 16.9     | Detected   | 19.2    | Detected | 15.7     | Not Detect | 21.1     | Not Detect | Tbxa2r        | 1.24852071  | 0.92899408 | 1.09895833 | 0.8177083 |
| A_55_P2021 | 9784.7   | Detected   | 11658.6 | Detected | 12608.6  | Detected   | 12215.5  | Detected   | Oxnad1        | 1.248428669 | 1.28860364 | 1.04776731 | 1.0814849 |
| A_55_P2103 | 30510.7  | Detected   | 25826.4 | Detected | 26315.5  | Detected   | 38090    | Detected   | Hgs           | 1.248414491 | 0.8625007  | 1.47484744 | 1.018938  |
| A_55_P1993 | 1416.2   | Detected   | 1607.5  | Detected | 2281.3   | Detected   | 1768     | Detected   | Tmem216       | 1.248411241 | 1.61086005 | 1.09984448 | 1.4191602 |
| A_55_P2064 | 167.9    | Detected   | 134.8   | Detected | 113.4    | Detected   | 209.6    | Detected   | Casp14        | 1.24836212  | 0.67540203 | 1.55489614 | 0.8412463 |
| A_55_P2024 | 649.9    | Detected   | 680.5   | Detected | 587.9    | Detected   | 811.3    | Detected   | Gaa           | 1.248345899 | 0.90460071 | 1.19221161 | 0.8639236 |
| A_51_P1763 | 720.2    | Detected   | 598.6   | Detected | 551.4    | Detected   | 899      | Detected   | Hook3         | 1.248264371 | 0.76562066 | 1.50183762 | 0.9211493 |
| A_55_P2025 | 15732.4  | Detected   | 19691.5 | Detected | 13925.4  | Detected   | 19637.8  | Detected   | Heatr3        | 1.248239302 | 0.88514149 | 0.99727294 | 0.7071782 |
| A_52_P3098 | 7723     | Detected   | 8036.8  | Detected | 6266.7   | Detected   | 9640     | Detected   | Cdkn3         | 1.248219604 | 0.81143338 | 1.19948238 | 0.7797506 |
| A_55_P2123 | 77130.3  | Detected   | 84693.3 | Detected | 81392.5  | Detected   | 96275.1  | Detected   | Minos1        | 1.248213737 | 1.05525974 | 1.1367499  | 0.9610264 |
| A_55_P2003 | 12.9     | Not Detect | 16.9    | Detected | 15       | Not Detect | 16.1     | Not Detect | Arhgef7       | 1.248062016 | 1.1627907  | 0.95266272 | 0.887574  |
| A_52_P5688 | 47139    | Detected   | 42744.8 | Detected | 58981.4  | Detected   | 58831.4  | Detected   | Ubxn1         | 1.2480409   | 1.25122298 | 1.37634051 | 1.3798497 |
| A_55_P2137 | 252.4    | Detected   | 285.8   | Detected | 253.8    | Detected   | 315      | Detected   | Cd79a         | 1.248019017 | 1.00554675 | 1.10216935 | 0.8880336 |
| A_51_P3251 | 685.5    | Detected   | 697     | Detected | 763.7    | Detected   | 855.4    | Detected   | Il27          | 1.247848286 | 1.11407732 | 1.22725968 | 1.0956958 |
| A_55_P2081 | 104942.1 | Detected   | 110569  | Detected | 111933.3 | Detected   | 130948.7 | Detected   | Raver1        | 1.247818559 | 1.06661959 | 1.18431658 | 1.0123389 |
| A_52_P3441 | 22.6     | Detected   | 29.3    | Detected | 17.8     | Not Detect | 28.2     | Not Detect | Pik3ip1       | 1.247787611 | 0.78761062 | 0.96245734 | 0.6075085 |
| A_52_P5154 | 1472.1   | Detected   | 1870.2  | Detected | 1038.5   | Detected   | 1836.8   | Detected   | Pard3         | 1.247741322 | 0.70545479 | 0.98214095 | 0.5552882 |
| A_55_P2052 | 27932.2  | Detected   | 22715   | Detected | 30661.1  | Detected   | 34851.2  | Detected   | Lamtor1       | 1.247706948 | 1.09769728 | 1.53428131 | 1.3498173 |
| A_55_P2091 | 75.1     | Detected   | 85.9    | Detected | 85.2     | Detected   | 93.7     | Detected   | Arr3          | 1.247669774 | 1.13448735 | 1.09080326 | 0.991851  |
| A_55_P2025 | 74.3     | Detected   | 106.7   | Detected | 150.2    | Detected   | 92.7     | Detected   | Tacr2         | 1.247644684 | 2.02153432 | 0.868791   | 1.4076851 |
| A_55_P2121 | 9861.1   | Detected   | 9030    | Detected | 11580.1  | Detected   | 12303    | Detected   | Cnot6l        | 1.247629575 | 1.17432132 | 1.36245847 | 1.2824031 |
| A_51_P2892 | 30.7     | Detected   | 48.8    | Detected | 49.2     | Detected   | 38.3     | Not Detect | F8            | 1.247557003 | 1.60260586 | 0.78483607 | 1.0081967 |

|            |         |            |         |          |         |            |         |            |               |             |            |            |           |
|------------|---------|------------|---------|----------|---------|------------|---------|------------|---------------|-------------|------------|------------|-----------|
| A_55_P2061 | 470.6   | Detected   | 446.6   | Detected | 781.4   | Detected   | 587.1   | Detected   | Gm3219        | 1.247556311 | 1.66043349 | 1.31459919 | 1.7496641 |
| A_55_P2046 | 3205.8  | Detected   | 2225.3  | Detected | 5290.1  | Detected   | 3999.3  | Detected   | Amot          | 1.24752012  | 1.65016533 | 1.79719588 | 2.3772525 |
| A_55_P2033 | 130.9   | Detected   | 145.3   | Detected | 128.3   | Detected   | 163.3   | Detected   | Lgi4          | 1.247517189 | 0.98013751 | 1.12388162 | 0.8830007 |
| A_51_P2119 | 2607.7  | Detected   | 2851.7  | Detected | 2558.3  | Detected   | 3253.1  | Detected   | Golga5        | 1.247497795 | 0.9810561  | 1.14075814 | 0.897114  |
| A_66_P1176 | 33690.6 | Detected   | 38808.5 | Detected | 43064.7 | Detected   | 42028.1 | Detected   | Zfp259        | 1.247472589 | 1.27824081 | 1.08296121 | 1.1096719 |
| A_55_P2074 | 154     | Detected   | 150.2   | Detected | 143     | Detected   | 192.1   | Detected   | Gm581         | 1.247402597 | 0.92857143 | 1.27896138 | 0.9520639 |
| A_55_P2161 | 47013.6 | Detected   | 59819.8 | Detected | 43479.7 | Detected   | 58642.6 | Detected   | Hmgb1-rs17    | 1.247353957 | 0.92483239 | 0.9803209  | 0.7268446 |
| A_52_P4782 | 13029.6 | Detected   | 17010.5 | Detected | 15514.8 | Detected   | 16252.4 | Detected   | Samm50        | 1.247344508 | 1.19073494 | 0.95543341 | 0.912072  |
| A_55_P2167 | 332.6   | Detected   | 404.8   | Detected | 316.5   | Detected   | 414.8   | Detected   | Homer3        | 1.247143716 | 0.95159351 | 1.02470356 | 0.7818676 |
| A_55_P2110 | 46060.5 | Detected   | 43656.7 | Detected | 63550.3 | Detected   | 57443.2 | Detected   | Cisd3         | 1.247124977 | 1.37971364 | 1.31579345 | 1.4556826 |
| A_55_P1959 | 339.7   | Detected   | 355.5   | Detected | 308.8   | Detected   | 423.6   | Detected   | Oas1b         | 1.246982632 | 0.90903739 | 1.19156118 | 0.8686357 |
| A_51_P2083 | 21881.5 | Detected   | 23260   | Detected | 21476.3 | Detected   | 27283   | Detected   | Trappc5       | 1.246852364 | 0.98148207 | 1.17295787 | 0.9233147 |
| A_51_P2947 | 1994.2  | Detected   | 1669.1  | Detected | 2336.1  | Detected   | 2486    | Detected   | Zfp954        | 1.246615184 | 1.1714472  | 1.48942544 | 1.3996166 |
| A_52_P6620 | 1303.3  | Detected   | 926.4   | Detected | 873.7   | Detected   | 1624.7  | Detected   | Net1          | 1.246604773 | 0.6703752  | 1.75377807 | 0.9431131 |
| A_55_P2132 | 7855.2  | Detected   | 8021.6  | Detected | 6189.2  | Detected   | 9791.8  | Detected   | Hsd3b2        | 1.246537326 | 0.78791119 | 1.22067917 | 0.7715668 |
| A_55_P2074 | 71.8    | Detected   | 59.7    | Detected | 55      | Detected   | 89.5    | Detected   | Ptgis         | 1.246518106 | 0.76601671 | 1.49916248 | 0.921273  |
| A_55_P2143 | 192.7   | Detected   | 174.9   | Detected | 220.7   | Detected   | 240.2   | Detected   | Gm9465        | 1.246497146 | 1.14530358 | 1.3733562  | 1.2618639 |
| A_52_P1920 | 28.4    | Detected   | 21.3    | Detected | 29.8    | Detected   | 35.4    | Not Detect | Nup210l       | 1.246478873 | 1.04929577 | 1.66197183 | 1.399061  |
| A_55_P2169 | 63.7    | Detected   | 52.8    | Detected | 68.9    | Detected   | 79.4    | Detected   | Olf458        | 1.246467818 | 1.08163265 | 1.50378788 | 1.3049242 |
| A_51_P3924 | 719.9   | Detected   | 544.2   | Detected | 916.4   | Detected   | 897.3   | Detected   | Mrgpre        | 1.246423114 | 1.27295458 | 1.64884234 | 1.6839397 |
| A_55_P2262 | 404.6   | Detected   | 203.9   | Detected | 223.7   | Detected   | 504.3   | Detected   | 9530053J19Rik | 1.246416214 | 0.55289174 | 2.47327121 | 1.0971064 |
| A_55_P1986 | 69.4    | Detected   | 64.9    | Detected | 63      | Detected   | 86.5    | Detected   | Plekhg5       | 1.246397695 | 0.90778098 | 1.33281972 | 0.9707242 |
| A_55_P2040 | 47.1    | Detected   | 58      | Detected | 57.1    | Detected   | 58.7    | Detected   | Gm10033       | 1.246284501 | 1.21231423 | 1.01206897 | 0.9844828 |
| A_51_P3171 | 564.9   | Detected   | 755.7   | Detected | 625.2   | Detected   | 704     | Detected   | Wdr18         | 1.246238272 | 1.10674456 | 0.93158661 | 0.8273124 |
| A_55_P2011 | 35670.4 | Detected   | 35105.9 | Detected | 45450.1 | Detected   | 44446.3 | Detected   | LOC675851     | 1.246027519 | 1.2741685  | 1.26606354 | 1.294657  |
| A_55_P2093 | 5969.5  | Detected   | 5579.6  | Detected | 6787.2  | Detected   | 7438.1  | Detected   | Pold3         | 1.246017254 | 1.13697965 | 1.33308839 | 1.2164313 |
| A_51_P2880 | 43.9    | Detected   | 77      | Detected | 58.7    | Detected   | 54.7    | Detected   | Chrng         | 1.246013667 | 1.33712984 | 0.71038961 | 0.7623377 |
| A_55_P2372 | 43.5    | Detected   | 43.9    | Detected | 34      | Detected   | 54.2    | Detected   | Zim3          | 1.245977011 | 0.7816092  | 1.23462415 | 0.7744875 |
| A_55_P2314 | 67.9    | Detected   | 67.5    | Detected | 60.7    | Detected   | 84.6    | Detected   | C920021A13    | 1.245949926 | 0.89396171 | 1.25333333 | 0.8992593 |
| A_66_P1000 | 13158.8 | Detected   | 14176.5 | Detected | 15041.2 | Detected   | 16394.2 | Detected   | Ccdc47        | 1.245873484 | 1.14305256 | 1.15643495 | 1.0609953 |
| A_55_P2111 | 11.8    | Not Detect | 15      | Detected | 12.7    | Not Detect | 14.7    | Not Detect | Tekt1         | 1.245762712 | 1.07627119 | 0.98       | 0.8466667 |
| A_52_P5957 | 1107.3  | Detected   | 1521.5  | Detected | 1437.2  | Detected   | 1379.4  | Detected   | Smug1         | 1.245732864 | 1.29793191 | 0.90660532 | 0.9445942 |
| A_51_P5067 | 29812.7 | Detected   | 26116.3 | Detected | 26228.4 | Detected   | 37138.1 | Detected   | Grf1          | 1.245714075 | 0.87977271 | 1.42202762 | 1.0042923 |
| A_52_P6099 | 51.3    | Detected   | 57.2    | Detected | 52.3    | Detected   | 63.9    | Detected   | Eln           | 1.245614035 | 1.01949318 | 1.11713287 | 0.9143357 |
| A_55_P2052 | 340     | Detected   | 287.4   | Detected | 279.6   | Detected   | 423.5   | Detected   | Scd3          | 1.245588235 | 0.82235294 | 1.47355602 | 0.9728601 |
| A_55_P2043 | 12674.2 | Detected   | 11351.4 | Detected | 11717.1 | Detected   | 15786.6 | Detected   | Rabac1        | 1.24556974  | 0.92448439 | 1.39071833 | 1.0322163 |
| A_55_P1959 | 308.7   | Detected   | 328.3   | Detected | 262.4   | Detected   | 384.5   | Detected   | Urgcp         | 1.245545837 | 0.8500162  | 1.17118489 | 0.799269  |
| A_55_P2183 | 50.1    | Detected   | 39.2    | Detected | 56.2    | Detected   | 62.4    | Detected   | Rdh13         | 1.245508982 | 1.12175649 | 1.59183673 | 1.4336735 |
| A_55_P2055 | 151.6   | Detected   | 147.5   | Detected | 166.8   | Detected   | 188.8   | Detected   | Mast1         | 1.245382586 | 1.10026385 | 1.28       | 1.1308475 |
| A_55_P1952 | 398.6   | Detected   | 384.8   | Detected | 400.1   | Detected   | 496.4   | Detected   | Ildr2         | 1.245358756 | 1.00376317 | 1.29002079 | 1.0397609 |



|            |         |            |         |            |         |          |         |            |               |             |            |            |           |
|------------|---------|------------|---------|------------|---------|----------|---------|------------|---------------|-------------|------------|------------|-----------|
| A_55_P1992 | 300     | Detected   | 269.5   | Detected   | 565.1   | Detected | 373.6   | Detected   | Mbp           | 1.245333333 | 1.88366667 | 1.38627087 | 2.096846  |
| A_55_P2105 | 510.1   | Detected   | 542.9   | Detected   | 408.9   | Detected | 635.2   | Detected   | Tmed5         | 1.24524603  | 0.80160753 | 1.17001289 | 0.7531774 |
| A_55_P2173 | 9168.1  | Detected   | 10623.5 | Detected   | 7241.1  | Detected | 11416.2 | Detected   | Hspa4l        | 1.245208931 | 0.78981468 | 1.07461759 | 0.6816115 |
| A_51_P3535 | 17711   | Detected   | 17655.9 | Detected   | 23328.8 | Detected | 22053.5 | Detected   | Sharpin       | 1.245186607 | 1.31719271 | 1.24907255 | 1.3213034 |
| A_55_P2345 | 46.1    | Detected   | 51.4    | Detected   | 47.7    | Detected | 57.4    | Detected   | Tcrg-V1       | 1.245119306 | 1.03470716 | 1.11673152 | 0.9280156 |
| A_51_P5185 | 9771.8  | Detected   | 12730.8 | Detected   | 13839.5 | Detected | 12166.4 | Detected   | Emg1          | 1.245052089 | 1.41626926 | 0.95566657 | 1.087088  |
| A_55_P2005 | 1278.1  | Detected   | 1276.4  | Detected   | 1008.6  | Detected | 1591.3  | Detected   | Bbs7          | 1.245051248 | 0.78914013 | 1.2467095  | 0.7901912 |
| A_55_P2075 | 633.8   | Detected   | 620.1   | Detected   | 958.2   | Detected | 789.1   | Detected   | Sptbn4        | 1.245029978 | 1.51183339 | 1.27253669 | 1.5452346 |
| A_55_P2050 | 76544.2 | Detected   | 89242.6 | Detected   | 97193.3 | Detected | 95298.7 | Detected   | Rpl36al       | 1.245015298 | 1.26976701 | 1.06786109 | 1.0890909 |
| A_55_P1962 | 733.1   | Detected   | 741.3   | Detected   | 716.5   | Detected | 912.7   | Detected   | Gbp1l1        | 1.244987041 | 0.97735643 | 1.23121543 | 0.9665453 |
| A_51_P4638 | 112.3   | Detected   | 110.9   | Detected   | 121.1   | Detected | 139.8   | Detected   | Fam161b       | 1.244879786 | 1.07836153 | 1.26059513 | 1.0919748 |
| A_51_P4350 | 1488.3  | Detected   | 1263.5  | Detected   | 1623    | Detected | 1852.6  | Detected   | Acadsb        | 1.244775919 | 1.09050595 | 1.46624456 | 1.2845271 |
| A_55_P2092 | 7947.4  | Detected   | 7224.2  | Detected   | 6315.9  | Detected | 9892.3  | Detected   | Pik3r2        | 1.244721544 | 0.79471274 | 1.36932809 | 0.8742698 |
| A_55_P2167 | 137.3   | Detected   | 144     | Detected   | 124.1   | Detected | 170.9   | Detected   | Gm6936        | 1.244719592 | 0.90386016 | 1.18680556 | 0.8618056 |
| A_55_P1957 | 19841.9 | Detected   | 25514.4 | Detected   | 23545.6 | Detected | 24697   | Detected   | Mpr1p         | 1.244689269 | 1.18666055 | 0.96796319 | 0.9228357 |
| A_55_P2424 | 258     | Detected   | 299.8   | Detected   | 245.8   | Detected | 321.1   | Detected   | C78228        | 1.244573643 | 0.95271318 | 1.07104736 | 0.8198799 |
| A_55_P1984 | 69.1    | Detected   | 48.4    | Detected   | 54.9    | Detected | 86      | Detected   | Gmcl1         | 1.244573082 | 0.79450072 | 1.7768595  | 1.1342975 |
| A_55_P2007 | 17754.3 | Detected   | 26486.4 | Detected   | 4660.5  | Detected | 22095.7 | Detected   | Pdgfa         | 1.244526678 | 0.26249979 | 0.83422813 | 0.1759582 |
| A_66_P1378 | 103.5   | Detected   | 98.5    | Detected   | 96.7    | Detected | 128.8   | Detected   | Gm9054        | 1.244444444 | 0.93429952 | 1.30761421 | 0.9817259 |
| A_55_P2010 | 6801.3  | Detected   | 7662.4  | Detected   | 6803.2  | Detected | 8463.7  | Detected   | Ewsr1         | 1.24442386  | 1.00027936 | 1.10457559 | 0.887868  |
| A_52_P5949 | 7715.2  | Detected   | 7314.3  | Detected   | 6472.5  | Detected | 9599.6  | Detected   | Pip4k2c       | 1.244245127 | 0.83892835 | 1.31244275 | 0.8849104 |
| A_55_P2060 | 10865.8 | Detected   | 10340.5 | Detected   | 9774.2  | Detected | 13519.1 | Detected   | Acsf2         | 1.244188187 | 0.899538   | 1.30739326 | 0.9452348 |
| A_51_P1324 | 19373.9 | Detected   | 19560.1 | Detected   | 20970.3 | Detected | 24100.7 | Detected   | Rpl27a        | 1.243977723 | 1.08239952 | 1.23213583 | 1.0720957 |
| A_55_P2076 | 2828.2  | Detected   | 2647.9  | Detected   | 3133    | Detected | 3518    | Detected   | 1700028116Rik | 1.243900714 | 1.10777173 | 1.32860002 | 1.1832018 |
| A_55_P2128 | 65614.5 | Detected   | 72813.4 | Detected   | 54724   | Detected | 81614.8 | Detected   | Cops6         | 1.243853112 | 0.83402297 | 1.1208761  | 0.751565  |
| A_55_P2088 | 24198.3 | Detected   | 28684   | Detected   | 27818.8 | Detected | 30094.7 | Detected   | Lamtor5       | 1.24367001  | 1.14961795 | 1.04918073 | 0.9698368 |
| A_51_P4353 | 11494.5 | Detected   | 12732.6 | Detected   | 12927.6 | Detected | 14294   | Detected   | Dctn2         | 1.243551264 | 1.12467702 | 1.1226301  | 1.015315  |
| A_55_P2133 | 988.9   | Detected   | 777     | Detected   | 687.5   | Detected | 1229.7  | Detected   | Tnrc6c        | 1.243502882 | 0.69521691 | 1.58262548 | 0.8848134 |
| A_51_P4991 | 2626.7  | Detected   | 2916.4  | Detected   | 3057.5  | Detected | 3266.3  | Detected   | Cog3          | 1.243499448 | 1.16400807 | 1.11997668 | 1.0483816 |
| A_55_P2035 | 38.2    | Detected   | 28      | Detected   | 62.9    | Detected | 47.5    | Detected   | Gm5817        | 1.243455497 | 1.64659686 | 1.69642857 | 2.2464286 |
| A_55_P2146 | 20095.4 | Detected   | 20238.1 | Detected   | 23861.2 | Detected | 24986.7 | Detected   | Sdhc          | 1.243403963 | 1.18739612 | 1.23463665 | 1.1790237 |
| A_55_P2058 | 4626.5  | Detected   | 3731.4  | Detected   | 3174.6  | Detected | 5752.6  | Detected   | Fancf         | 1.24340214  | 0.68617746 | 1.54167337 | 0.8507799 |
| A_55_P2175 | 650.9   | Detected   | 775.9   | Detected   | 711.1   | Detected | 809.3   | Detected   | Tet3          | 1.243355354 | 1.09248733 | 1.04304678 | 0.9164841 |
| A_52_P1048 | 6175.6  | Detected   | 6113.9  | Detected   | 5894.5  | Detected | 7678.4  | Detected   | Diap3         | 1.243344776 | 0.95448216 | 1.25589231 | 0.9641146 |
| A_52_P5143 | 852.3   | Detected   | 359.3   | Detected   | 1339.7  | Detected | 1059.7  | Detected   | Kcnk5         | 1.243341546 | 1.57186437 | 2.94934595 | 3.728639  |
| A_55_P2129 | 512.6   | Detected   | 549     | Detected   | 521.9   | Detected | 637.3   | Detected   | Slc38a10      | 1.243269606 | 1.0181428  | 1.16083789 | 0.9506375 |
| A_55_P2150 | 28449.9 | Detected   | 40910.9 | Detected   | 29974.5 | Detected | 35370.8 | Detected   | Gadd45gip1    | 1.243266233 | 1.05358894 | 0.86458132 | 0.7326776 |
| A_55_P2159 | 7.4     | Not Detect | 6.7     | Not Detect | 98.9    | Detected | 9.2     | Not Detect | Gm6818        | 1.243243243 | 13.3648649 | 1.37313433 | 14.761194 |
| A_52_P2655 | 7.4     | Not Detect | 11.4    | Not Detect | 18.8    | Detected | 9.2     | Not Detect | Vmo1          | 1.243243243 | 2.54054054 | 0.80701754 | 1.6491228 |
| A_55_P1990 | 3103.6  | Detected   | 2152    | Detected   | 2940.3  | Detected | 3858.4  | Detected   | Casp9         | 1.243201443 | 0.94738368 | 1.7929368  | 1.3663104 |

|            |          |          |          |            |          |            |          |            |               |             |            |            |           |
|------------|----------|----------|----------|------------|----------|------------|----------|------------|---------------|-------------|------------|------------|-----------|
| A_55_P1989 | 122460.8 | Detected | 142997.4 | Detected   | 163478.7 | Detected   | 152243   | Detected   | Gm4963        | 1.243197823 | 1.33494718 | 1.06465572 | 1.1432285 |
| A_55_P2029 | 32.9     | Detected | 28.8     | Detected   | 31.5     | Detected   | 40.9     | Not Detect | Nt5c1a        | 1.243161094 | 0.95744681 | 1.42013889 | 1.09375   |
| A_51_P4221 | 21.8     | Detected | 22.5     | Detected   | 15.7     | Not Detect | 27.1     | Not Detect | Pxt1          | 1.243119266 | 0.72018349 | 1.20444444 | 0.6977778 |
| A_55_P2061 | 195      | Detected | 195.5    | Detected   | 188.6    | Detected   | 242.4    | Detected   | Tbx6          | 1.243076923 | 0.96717949 | 1.2398977  | 0.9647059 |
| A_51_P2206 | 2911.6   | Detected | 2736.9   | Detected   | 3371.4   | Detected   | 3619.2   | Detected   | Fam134c       | 1.243027888 | 1.15792004 | 1.32237203 | 1.2318316 |
| A_55_P2043 | 293      | Detected | 299.6    | Detected   | 292.8    | Detected   | 364.2    | Detected   | Gm9258        | 1.243003413 | 0.99931741 | 1.21562083 | 0.9773031 |
| A_55_P2066 | 1943.5   | Detected | 2059.6   | Detected   | 2627.3   | Detected   | 2415.7   | Detected   | Cav2          | 1.242963725 | 1.35183946 | 1.17289765 | 1.275636  |
| A_55_P2038 | 11115.2  | Detected | 11511.6  | Detected   | 10093.1  | Detected   | 13815.7  | Detected   | BC051019      | 1.242955592 | 0.90804484 | 1.20015463 | 0.8767765 |
| A_66_P1236 | 159.7    | Detected | 151.1    | Detected   | 144.1    | Detected   | 198.5    | Detected   | Gdap1l1       | 1.242955542 | 0.90231684 | 1.31369954 | 0.9536731 |
| A_66_P1261 | 901.9    | Detected | 710.4    | Detected   | 805.8    | Detected   | 1121     | Detected   | Ercc5         | 1.242931589 | 0.89344717 | 1.57798423 | 1.1342905 |
| A_55_P2046 | 735.6    | Detected | 743.9    | Detected   | 684.5    | Detected   | 914.3    | Detected   | Vmn1r70       | 1.242930941 | 0.9305329  | 1.22906305 | 0.9201506 |
| A_51_P4932 | 742.1    | Detected | 795.1    | Detected   | 841.5    | Detected   | 922.3    | Detected   | Dapk3         | 1.242824417 | 1.13394421 | 1.15997988 | 1.0583574 |
| A_55_P2003 | 309.3    | Detected | 248.9    | Detected   | 318.5    | Detected   | 384.4    | Detected   | Rmdn1         | 1.242806337 | 1.02974458 | 1.54439534 | 1.2796304 |
| A_52_P1907 | 51.9     | Detected | 67.8     | Detected   | 60.1     | Detected   | 64.5     | Detected   | Ppp1r3fos     | 1.242774566 | 1.15799615 | 0.95132743 | 0.8864307 |
| A_55_P2007 | 5937.5   | Detected | 6082     | Detected   | 6467.2   | Detected   | 7378.8   | Detected   | Eprs          | 1.242745263 | 1.08921263 | 1.21321934 | 1.0633344 |
| A_51_P3378 | 2179.8   | Detected | 2046.5   | Detected   | 2361.4   | Detected   | 2708.9   | Detected   | Ubl7          | 1.242728691 | 1.0833104  | 1.32367457 | 1.1538725 |
| A_51_P1613 | 3837.3   | Detected | 2691.6   | Detected   | 5418.5   | Detected   | 4768.7   | Detected   | Abcb6         | 1.242722748 | 1.41206056 | 1.77169713 | 2.0131149 |
| A_55_P1969 | 133.9    | Detected | 111.5    | Detected   | 104.5    | Detected   | 166.4    | Detected   | Zdhc9         | 1.242718447 | 0.78043316 | 1.49237668 | 0.9372197 |
| A_55_P2228 | 900.8    | Detected | 945.1    | Detected   | 1005.9   | Detected   | 1119.3   | Detected   | 4921529L05Rik | 1.242562167 | 1.11667407 | 1.18431912 | 1.0643318 |
| A_55_P2149 | 176.9    | Detected | 200.5    | Detected   | 207.6    | Detected   | 219.8    | Detected   | Gm16491       | 1.242509893 | 1.17354438 | 1.09625935 | 1.0354115 |
| A_55_P2301 | 73       | Detected | 92.8     | Detected   | 52       | Detected   | 90.7     | Detected   | 9930024M15Rik | 1.242465753 | 0.71232877 | 0.97737069 | 0.5603448 |
| A_55_P2106 | 572.9    | Detected | 785.5    | Detected   | 719      | Detected   | 711.8    | Detected   | Zfp410        | 1.242450689 | 1.25501833 | 0.90617441 | 0.9153405 |
| A_52_P8906 | 1240.3   | Detected | 1216.7   | Detected   | 1427.8   | Detected   | 1540.8   | Detected   | Dusp18        | 1.242280094 | 1.1511731  | 1.26637626 | 1.1735021 |
| A_51_P1679 | 9348.3   | Detected | 10193    | Detected   | 11893.5  | Detected   | 11612.8  | Detected   | Bace1         | 1.242236556 | 1.27226341 | 1.13929167 | 1.1668302 |
| A_51_P1601 | 14166.5  | Detected | 13126.7  | Detected   | 18987.1  | Detected   | 17596.9  | Detected   | Copb1         | 1.242148731 | 1.34028165 | 1.34054256 | 1.4464488 |
| A_55_P2065 | 81724.4  | Detected | 89810.8  | Detected   | 86130.7  | Detected   | 101513.2 | Detected   | S100a11       | 1.242140658 | 1.05391658 | 1.13030059 | 0.9590239 |
| A_55_P1955 | 44.2     | Detected | 58.3     | Detected   | 20.7     | Detected   | 54.9     | Detected   | Gm6146        | 1.242081448 | 0.46832579 | 0.94168096 | 0.35506   |
| A_55_P2419 | 25.2     | Detected | 18.9     | Detected   | 8.4      | Not Detect | 31.3     | Not Detect | 1110028F11Rik | 1.242063492 | 0.33333333 | 1.65608466 | 0.4444444 |
| A_51_P1299 | 100.8    | Detected | 86       | Detected   | 120.5    | Detected   | 125.2    | Detected   | Cacfd1        | 1.242063492 | 1.19543651 | 1.45581395 | 1.4011628 |
| A_55_P2020 | 15.7     | Detected | 9.9      | Not Detect | 9.3      | Not Detect | 19.5     | Not Detect | Trim42        | 1.242038217 | 0.59235669 | 1.96969697 | 0.9393939 |
| A_51_P4499 | 13742.2  | Detected | 13574.9  | Detected   | 12658.2  | Detected   | 17067.5  | Detected   | Cnot6         | 1.241977267 | 0.92111889 | 1.25728366 | 0.932471  |
| A_51_P4242 | 2490.5   | Detected | 1946     | Detected   | 2546     | Detected   | 3093     | Detected   | Irf2bp2       | 1.241919293 | 1.02228468 | 1.58941418 | 1.3083248 |
| A_55_P2029 | 83.5     | Detected | 78.6     | Detected   | 71.5     | Detected   | 103.7    | Detected   | Gm9510        | 1.241916168 | 0.85628743 | 1.31933842 | 0.9096692 |
| A_52_P4651 | 38409.6  | Detected | 23917.4  | Detected   | 41694.7  | Detected   | 47699.8  | Detected   | Chp1          | 1.241871824 | 1.0855281  | 1.99435557 | 1.743279  |
| A_51_P5010 | 5652.2   | Detected | 5367.2   | Detected   | 5888.1   | Detected   | 7019.1   | Detected   | Nek2          | 1.241835038 | 1.04173596 | 1.30777687 | 1.0970525 |
| A_55_P2054 | 28622.5  | Detected | 28911.1  | Detected   | 35674.3  | Detected   | 35542.6  | Detected   | Fam136a       | 1.241771334 | 1.24637261 | 1.22937557 | 1.2339309 |
| A_55_P2410 | 193.2    | Detected | 183.2    | Detected   | 84.7     | Detected   | 239.9    | Detected   | A430061O12Rik | 1.241718427 | 0.4384058  | 1.30949782 | 0.4623362 |
| A_55_P1994 | 19228.2  | Detected | 24866.3  | Detected   | 14254.9  | Detected   | 23874.4  | Detected   | Ppp2cb        | 1.241634682 | 0.74135384 | 0.96011067 | 0.5732618 |
| A_52_P6529 | 6854.1   | Detected | 5951.3   | Detected   | 1720.6   | Detected   | 8509.6   | Detected   | Akip1         | 1.241534264 | 0.25103223 | 1.42987246 | 0.2891133 |
| A_55_P2078 | 1742.8   | Detected | 1974.8   | Detected   | 1193.3   | Detected   | 2163.7   | Detected   | Prr5          | 1.241507918 | 0.68470278 | 1.09565526 | 0.6042637 |

|            |         |            |          |            |         |            |          |            |               |             |            |            |            |
|------------|---------|------------|----------|------------|---------|------------|----------|------------|---------------|-------------|------------|------------|------------|
| A_55_P2037 | 128.9   | Detected   | 155.7    | Detected   | 136.9   | Detected   | 160      | Detected   | Dnah14        | 1.241272304 | 1.06206362 | 1.02761721 | 0.879255   |
| A_55_P2016 | 62.6    | Detected   | 57.5     | Detected   | 51.3    | Detected   | 77.7     | Detected   | Rhox3f        | 1.241214058 | 0.81948882 | 1.35130435 | 0.8921739  |
| A_55_P2337 | 96.2    | Detected   | 87.4     | Detected   | 86.4    | Detected   | 119.4    | Detected   | 2310065F04Rik | 1.241164241 | 0.8981289  | 1.36613272 | 0.9885584  |
| A_51_P3302 | 21582.3 | Detected   | 22270.6  | Detected   | 19158.2 | Detected   | 26786.6  | Detected   | Asf1b         | 1.241137414 | 0.88768111 | 1.20277855 | 0.8602462  |
| A_52_P6744 | 3297.7  | Detected   | 3361.7   | Detected   | 3568.3  | Detected   | 4092.2   | Detected   | Mkln1         | 1.240925494 | 1.08205719 | 1.21730077 | 1.061457   |
| A_51_P4817 | 3564.4  | Detected   | 2949.9   | Detected   | 3944.7  | Detected   | 4423     | Detected   | Mapk1         | 1.240882056 | 1.10669397 | 1.49937286 | 1.3372318  |
| A_55_P2012 | 16.2    | Detected   | 21.7     | Detected   | 14      | Not Detect | 20.1     | Not Detect | Tnfrsf19      | 1.240740741 | 0.86419753 | 0.92626728 | 0.6451613  |
| A_55_P2127 | 33108.2 | Detected   | 31491.9  | Detected   | 35430.8 | Detected   | 41076.6  | Detected   | Trim35        | 1.240677536 | 1.07015181 | 1.30435445 | 1.1250766  |
| A_55_P2002 | 16009.9 | Detected   | 11466.8  | Detected   | 14746.4 | Detected   | 19861.7  | Detected   | Golga2        | 1.240588636 | 0.92108008 | 1.73210486 | 1.2860083  |
| A_55_P2063 | 48199.9 | Detected   | 61459.2  | Detected   | 67118.3 | Detected   | 59794    | Detected   | Tomm5         | 1.240541993 | 1.39249874 | 0.9729056  | 1.092079   |
| A_66_P1197 | 7.9     | Not Detect | 6        | Not Detect | 22.7    | Detected   | 9.8      | Not Detect | Nme8          | 1.240506329 | 2.87341772 | 1.63333333 | 3.7833333  |
| A_55_P2205 | 97.3    | Detected   | 115.8    | Detected   | 103.2   | Detected   | 120.7    | Detected   | Polk          | 1.24049332  | 1.0606372  | 1.04231434 | 0.8911917  |
| A_55_P2044 | 24708.7 | Detected   | 32226.3  | Detected   | 34440.8 | Detected   | 30648.6  | Detected   | Mpp6          | 1.240397107 | 1.39387341 | 0.95104309 | 1.0687172  |
| A_55_P2071 | 144.8   | Detected   | 128.4    | Detected   | 173.5   | Detected   | 179.6    | Detected   | Pcnx          | 1.240331492 | 1.19820442 | 1.39875389 | 1.3512461  |
| A_51_P5067 | 3962    | Detected   | 2702.5   | Detected   | 3377.6  | Detected   | 4914.1   | Detected   | Tep1          | 1.240307925 | 0.85249874 | 1.81835338 | 1.2498057  |
| A_51_P4772 | 32.9    | Detected   | 35.3     | Detected   | 28.1    | Detected   | 40.8     | Not Detect | Olf780        | 1.240121581 | 0.85410334 | 1.15580737 | 0.796034   |
| A_55_P2084 | 110     | Detected   | 105.6    | Detected   | 96.1    | Detected   | 136.4    | Detected   | Ighmbp2       | 1.240121581 | 1.24       | 0.87363636 | 1.29166667 |
| A_55_P2101 | 2754    | Detected   | 2364     | Detected   | 2321.8  | Detected   | 3414.7   | Detected   | Zhx3          | 1.239905592 | 0.84306463 | 1.44445854 | 0.9821489  |
| A_55_P2166 | 97402.6 | Detected   | 108196.9 | Detected   | 72216.9 | Detected   | 120767.8 | Detected   | Gm5637        | 1.239882714 | 0.74142682 | 1.1161854  | 0.6674581  |
| A_51_P3600 | 135.9   | Detected   | 151.6    | Detected   | 151.5   | Detected   | 168.5    | Detected   | Ocstamp       | 1.239882266 | 1.11479029 | 1.11147757 | 0.9993404  |
| A_55_P1981 | 6860.6  | Detected   | 6428.4   | Detected   | 6566.7  | Detected   | 8505.5   | Detected   | Zcchc6        | 1.239760371 | 0.95716118 | 1.32311306 | 1.0215139  |
| A_55_P2166 | 14.6    | Detected   | 14.3     | Not Detect | 16.2    | Not Detect | 18.1     | Not Detect | Dspp          | 1.239726027 | 1.10958904 | 1.26573427 | 1.1328671  |
| A_51_P1779 | 15606.4 | Detected   | 12639.7  | Detected   | 17748   | Detected   | 19344.9  | Detected   | Itfg3         | 1.239549159 | 1.13722575 | 1.53048727 | 1.4041473  |
| A_66_P1041 | 950.1   | Detected   | 666.9    | Detected   | 871.6   | Detected   | 1177.6   | Detected   | Gsk3b         | 1.239448479 | 0.91737712 | 1.76578198 | 1.3069426  |
| A_52_P3772 | 852     | Detected   | 691.3    | Detected   | 955.7   | Detected   | 1056     | Detected   | Zbtb11        | 1.23943662  | 1.12171362 | 1.52755678 | 1.3824678  |
| A_55_P2079 | 768.9   | Detected   | 655.6    | Detected   | 631     | Detected   | 953      | Detected   | LOC101056153  | 1.239432956 | 0.82065288 | 1.45363026 | 0.9624771  |
| A_52_P4217 | 965.8   | Detected   | 907.4    | Detected   | 1668    | Detected   | 1197     | Detected   | 9930012K11Rik | 1.239387037 | 1.72706565 | 1.31915363 | 1.8382191  |
| A_55_P2137 | 1638.9  | Detected   | 851.3    | Detected   | 2377    | Detected   | 2031.2   | Detected   | Cd82          | 1.239367869 | 1.45036305 | 2.38599789 | 2.7922002  |
| A_55_P2035 | 3685.8  | Detected   | 4017.3   | Detected   | 3682.6  | Detected   | 4568     | Detected   | Mark3         | 1.239351023 | 0.9991318  | 1.13708212 | 0.9166853  |
| A_55_P2021 | 463.8   | Detected   | 401.6    | Detected   | 384.2   | Detected   | 574.8    | Detected   | Cltb          | 1.239327296 | 0.8283743  | 1.4312749  | 0.9566733  |
| A_51_P1186 | 2924.5  | Detected   | 3100.6   | Detected   | 2373    | Detected   | 3624.2   | Detected   | Wdr6          | 1.239254573 | 0.81142076 | 1.16887054 | 0.7653357  |
| A_55_P2236 | 442.7   | Detected   | 468.2    | Detected   | 643     | Detected   | 548.6    | Detected   | Ccnc          | 1.239213915 | 1.45245087 | 1.17172149 | 1.3733447  |
| A_51_P3998 | 328.2   | Detected   | 225.2    | Detected   | 102.9   | Detected   | 406.7    | Detected   | Zfp704        | 1.239183425 | 0.31352834 | 1.80595027 | 0.4569272  |
| A_55_P2170 | 2837.9  | Detected   | 2316     | Detected   | 3198.5  | Detected   | 3516.5   | Detected   | Yipf2         | 1.239120476 | 1.12706579 | 1.5183506  | 1.3810449  |
| A_55_P2117 | 24731.3 | Detected   | 21805.9  | Detected   | 24183   | Detected   | 30644.3  | Detected   | Coasy         | 1.239089736 | 0.97782971 | 1.4053215  | 1.1090118  |
| A_51_P2597 | 289.9   | Detected   | 340.5    | Detected   | 286.6   | Detected   | 359.2    | Detected   | Gm10627       | 1.239047948 | 0.98861676 | 1.05491924 | 0.8417034  |
| A_52_P1431 | 61.5    | Detected   | 81       | Detected   | 74      | Detected   | 76.2     | Detected   | Eno4          | 1.23902439  | 1.20325203 | 0.94074074 | 0.9135802  |
| A_55_P2114 | 4763.3  | Detected   | 4778.7   | Detected   | 4630.8  | Detected   | 5901.1   | Detected   | Zcchc7        | 1.238868012 | 0.97218315 | 1.23487559 | 0.9690502  |
| A_55_P1985 | 117.7   | Detected   | 138.3    | Detected   | 130.1   | Detected   | 145.8    | Detected   | Nkx2-2        | 1.238742566 | 1.10535259 | 1.05422993 | 0.9407086  |
| A_55_P2141 | 66.6    | Detected   | 66.1     | Detected   | 40.9    | Detected   | 82.5     | Detected   | Gm13271       | 1.238738739 | 0.61411411 | 1.24810893 | 0.6187595  |

|            |         |            |         |            |         |            |         |            |               |             |            |            |           |
|------------|---------|------------|---------|------------|---------|------------|---------|------------|---------------|-------------|------------|------------|-----------|
| A_51_P3412 | 37.7    | Detected   | 35.8    | Detected   | 37.4    | Detected   | 46.7    | Detected   | Dmrtb1        | 1.23872679  | 0.99204244 | 1.30446927 | 1.0446927 |
| A_52_P5384 | 343.2   | Detected   | 300.2   | Detected   | 394.1   | Detected   | 425.1   | Detected   | Bloc1s5       | 1.238636364 | 1.14831002 | 1.41605596 | 1.3127915 |
| A_55_P1959 | 8.8     | Not Detect | 21.1    | Detected   | 7.9     | Not Detect | 10.9    | Not Detect | Xlr3b         | 1.238636364 | 0.89772727 | 0.51658768 | 0.3744076 |
| A_51_P1482 | 549.4   | Detected   | 435.5   | Detected   | 689.9   | Detected   | 680.5   | Detected   | Son           | 1.238623953 | 1.25573353 | 1.56257176 | 1.5841561 |
| A_52_P4908 | 20697.7 | Detected   | 21401.7 | Detected   | 32154.1 | Detected   | 25636.6 | Detected   | Nop10         | 1.238620716 | 1.55351078 | 1.1978768  | 1.5024087 |
| A_55_P2030 | 2221.9  | Detected   | 2825.8  | Detected   | 1553.1  | Detected   | 2752    | Detected   | Sirt1         | 1.238579594 | 0.69899635 | 0.9738835  | 0.5496143 |
| A_51_P3251 | 19.7    | Detected   | 23.1    | Detected   | 19.9    | Detected   | 24.4    | Not Detect | 3110009E18Rik | 1.23857868  | 1.01015228 | 1.05627706 | 0.8614719 |
| A_51_P1323 | 72.1    | Detected   | 65.2    | Detected   | 56.1    | Detected   | 89.3    | Detected   | Akt3          | 1.238557559 | 0.77808599 | 1.3696319  | 0.8604294 |
| A_51_P4287 | 933.7   | Detected   | 1022.7  | Detected   | 1371.7  | Detected   | 1156.4  | Detected   | Grik5         | 1.238513441 | 1.46910142 | 1.13073238 | 1.3412535 |
| A_55_P1989 | 44180   | Detected   | 34341.8 | Detected   | 43619.7 | Detected   | 54715.1 | Detected   | Zbtb7b        | 1.238458579 | 0.98731779 | 1.59325079 | 1.2701635 |
| A_65_P0199 | 453.5   | Detected   | 316.4   | Detected   | 475     | Detected   | 561.6   | Detected   | Prrg4         | 1.238368247 | 1.04740904 | 1.77496839 | 1.5012642 |
| A_52_P5525 | 1837.5  | Detected   | 1036.8  | Detected   | 2138.6  | Detected   | 2275.5  | Detected   | 1110054M08Rik | 1.238367347 | 1.16386395 | 2.1947338  | 2.0626929 |
| A_55_P2325 | 1749.1  | Detected   | 1139.1  | Detected   | 1908.2  | Detected   | 2166    | Detected   | Tnfrsf11a     | 1.238351152 | 1.09096107 | 1.90150119 | 1.6751822 |
| A_66_P1235 | 32692.1 | Detected   | 28833.3 | Detected   | 40776.1 | Detected   | 40481.5 | Detected   | Ndufb4        | 1.238265514 | 1.24727687 | 1.40398428 | 1.4142016 |
| A_51_P1585 | 4420.3  | Detected   | 4093.8  | Detected   | 5784.1  | Detected   | 5473.1  | Detected   | Poll          | 1.23817388  | 1.3085311  | 1.33692413 | 1.4128927 |
| A_55_P2165 | 597.7   | Detected   | 524.7   | Detected   | 639.1   | Detected   | 740     | Detected   | Arhgef1       | 1.238079304 | 1.06926552 | 1.41032971 | 1.2180294 |
| A_55_P2079 | 3985.1  | Detected   | 3058.3  | Detected   | 2123.8  | Detected   | 4933.8  | Detected   | Rnf43         | 1.23806178  | 0.53293518 | 1.61324919 | 0.6944381 |
| A_55_P1975 | 37.4    | Detected   | 39.3    | Detected   | 36.6    | Detected   | 46.3    | Not Detect | Acyp1         | 1.237967914 | 0.97860963 | 1.17811705 | 0.9312977 |
| A_55_P2043 | 279.9   | Detected   | 263.1   | Detected   | 242.4   | Detected   | 346.5   | Detected   | 4930480E11Rik | 1.237942122 | 0.86602358 | 1.31698974 | 0.9213227 |
| A_51_P3330 | 10285.2 | Detected   | 10458.4 | Detected   | 13440.3 | Detected   | 12731.9 | Detected   | Ier3ip1       | 1.237885505 | 1.30676117 | 1.21738507 | 1.2851201 |
| A_51_P1432 | 866.9   | Detected   | 902.2   | Detected   | 838.1   | Detected   | 1073.1  | Detected   | Wdr59         | 1.237859038 | 0.96677818 | 1.18942585 | 0.9289515 |
| A_55_P2248 | 6105.6  | Detected   | 5545.9  | Detected   | 5891.3  | Detected   | 7557.6  | Detected   | Aak1          | 1.237814465 | 0.96490107 | 1.36273644 | 1.0622802 |
| A_55_P1986 | 860.9   | Detected   | 774.1   | Detected   | 1081.1  | Detected   | 1065.6  | Detected   | Gdpgp1        | 1.237774422 | 1.25577884 | 1.37656634 | 1.3965896 |
| A_51_P5186 | 390.8   | Detected   | 460     | Detected   | 734.5   | Detected   | 483.7   | Detected   | Hist1h3a      | 1.237717503 | 1.87947799 | 1.05152174 | 1.5967391 |
| A_55_P2195 | 46.7    | Detected   | 38.9    | Detected   | 52.6    | Detected   | 57.8    | Detected   | 9030407P20Rik | 1.237687366 | 1.12633833 | 1.48586118 | 1.3521851 |
| A_51_P4065 | 7383.8  | Detected   | 5255.3  | Detected   | 7639.5  | Detected   | 9138.3  | Detected   | Myo1e         | 1.237614778 | 1.03462987 | 1.73887314 | 1.4536753 |
| A_51_P2795 | 11266.3 | Detected   | 10925.7 | Detected   | 16889.1 | Detected   | 13942.6 | Detected   | Cav2          | 1.237549151 | 1.49908133 | 1.27612876 | 1.545814  |
| A_51_P2255 | 8       | Not Detect | 13.5    | Not Detect | 20.8    | Detected   | 9.9     | Not Detect | Olf981        | 1.2375      | 2.6        | 0.73333333 | 1.5407407 |
| A_52_P1894 | 8       | Not Detect | 32.8    | Detected   | 13.7    | Not Detect | 9.9     | Not Detect | Atp8a2        | 1.2375      | 1.7125     | 0.30182927 | 0.4176829 |
| A_55_P2022 | 370.6   | Detected   | 455.9   | Detected   | 399.7   | Detected   | 458.6   | Detected   | Ndufv3        | 1.237452779 | 1.07852132 | 1.00592235 | 0.8767274 |
| A_55_P2122 | 1606.4  | Detected   | 1573.6  | Detected   | 1587.7  | Detected   | 1987.8  | Detected   | Nfic          | 1.237425299 | 0.98835906 | 1.2632181  | 1.0089603 |
| A_51_P1048 | 4228.5  | Detected   | 4129.6  | Detected   | 3134.4  | Detected   | 5232.4  | Detected   | Ept1          | 1.237412794 | 0.74125576 | 1.26704766 | 0.7590081 |
| A_55_P2442 | 327.7   | Detected   | 313.2   | Detected   | 488.8   | Detected   | 405.5   | Detected   | Samd8         | 1.237412267 | 1.49160818 | 1.29469987 | 1.5606641 |
| A_51_P5003 | 43856   | Detected   | 59978.9 | Detected   | 53572.2 | Detected   | 54264   | Detected   | Mat2a         | 1.237322145 | 1.22154779 | 0.90471816 | 0.8931841 |
| A_55_P2101 | 15.6    | Detected   | 13.7    | Not Detect | 14.6    | Not Detect | 19.3    | Not Detect | Pard3b        | 1.237179487 | 0.93589744 | 1.40875912 | 1.0656934 |
| A_51_P3436 | 2786.6  | Detected   | 2209.3  | Detected   | 4024.2  | Detected   | 3447.3  | Detected   | Ehd2          | 1.237098974 | 1.44412546 | 1.56035848 | 1.8214819 |
| A_51_P2644 | 352.3   | Detected   | 410.1   | Detected   | 397.4   | Detected   | 435.8   | Detected   | Pgam2         | 1.237013909 | 1.1280159  | 1.06266764 | 0.9690319 |
| A_52_P8880 | 2374.8  | Detected   | 2601.4  | Detected   | 1860.3  | Detected   | 2937.6  | Detected   | Vps37a        | 1.236988378 | 0.78335018 | 1.1292381  | 0.7151149 |
| A_51_P1286 | 39934.7 | Detected   | 39893.8 | Detected   | 50424.9 | Detected   | 49397.6 | Detected   | Uqcrc2        | 1.236959336 | 1.26268383 | 1.23822749 | 1.2639784 |
| A_55_P2141 | 42994.7 | Detected   | 39540.2 | Detected   | 50774.4 | Detected   | 53179.2 | Detected   | Tagln2        | 1.236878034 | 1.18094556 | 1.34494009 | 1.284121  |

|            |         |          |         |          |         |          |         |            |               |             |            |            |           |
|------------|---------|----------|---------|----------|---------|----------|---------|------------|---------------|-------------|------------|------------|-----------|
| A_51_P1454 | 17068.1 | Detected | 14188.7 | Detected | 24440.1 | Detected | 21110.4 | Detected   | Lpcat3        | 1.236833625 | 1.43191685 | 1.48783187 | 1.7225045 |
| A_55_P2133 | 125     | Detected | 69.7    | Detected | 86.8    | Detected | 154.6   | Detected   | Eid2b         | 1.2368      | 0.6944     | 2.21807747 | 1.2453372 |
| A_55_P2002 | 15126.7 | Detected | 11220.4 | Detected | 15890.4 | Detected | 18707   | Detected   | Trim26        | 1.236687447 | 1.05048689 | 1.66723111 | 1.4162062 |
| A_51_P1295 | 286.5   | Detected | 312     | Detected | 337.1   | Detected | 354.3   | Detected   | Sstr4         | 1.236649215 | 1.17661431 | 1.13557692 | 1.0804487 |
| A_55_P2056 | 88.4    | Detected | 70.7    | Detected | 110.6   | Detected | 109.3   | Detected   | Igfbp2        | 1.236425339 | 1.25113122 | 1.54596888 | 1.5643564 |
| A_55_P2054 | 643     | Detected | 708.5   | Detected | 697.9   | Detected | 795     | Detected   | Trappc1       | 1.236391913 | 1.08538103 | 1.12208892 | 0.9850388 |
| A_52_P4533 | 33      | Detected | 42.5    | Detected | 39.1    | Detected | 40.8    | Not Detect | Lrrn4cl       | 1.236363636 | 1.18484848 | 0.96       | 0.92      |
| A_55_P2043 | 333.4   | Detected | 310.7   | Detected | 404.7   | Detected | 412.2   | Detected   | C330027C09Rik | 1.236352729 | 1.21385723 | 1.32668169 | 1.3025426 |
| A_55_P2133 | 2532.2  | Detected | 586.4   | Detected | 1275.5  | Detected | 3130.6  | Detected   | Dmkn          | 1.236316247 | 0.50371219 | 5.33867667 | 2.1751364 |
| A_55_P2021 | 18778.1 | Detected | 20088   | Detected | 18593.4 | Detected | 23214.4 | Detected   | Elp5          | 1.236248609 | 0.99016407 | 1.15563521 | 0.9255974 |
| A_52_P1830 | 216.3   | Detected | 211.5   | Detected | 391.6   | Detected | 267.4   | Detected   | Rnf146        | 1.236245955 | 1.81044845 | 1.2643026  | 1.8515366 |
| A_52_P2370 | 383.2   | Detected | 391.7   | Detected | 176.5   | Detected | 473.7   | Detected   | Prmt6         | 1.236169102 | 0.46059499 | 1.20934389 | 0.4505999 |
| A_51_P2755 | 46323.3 | Detected | 58886.9 | Detected | 54315.2 | Detected | 57261.5 | Detected   | Mprp          | 1.236127392 | 1.17252441 | 0.97239794 | 0.9223647 |
| A_65_P1623 | 493.4   | Detected | 527     | Detected | 258.8   | Detected | 609.9   | Detected   | Ttc39b        | 1.236116741 | 0.52452371 | 1.1573055  | 0.4910816 |
| A_66_P1106 | 4811.7  | Detected | 5135.5  | Detected | 4623    | Detected | 5947.7  | Detected   | Sart1         | 1.236091194 | 0.96078309 | 1.15815403 | 0.9002045 |
| A_51_P2837 | 11009.9 | Detected | 10222.7 | Detected | 12346.4 | Detected | 13607.8 | Detected   | Cpsf7         | 1.235960363 | 1.12139075 | 1.33113561 | 1.2077436 |
| A_55_P2131 | 5518.8  | Detected | 4877.4  | Detected | 5669    | Detected | 6820.8  | Detected   | Trnau1ap      | 1.235920852 | 1.02721606 | 1.39844999 | 1.1622996 |
| A_55_P1989 | 324.7   | Detected | 303.4   | Detected | 236.3   | Detected | 401.3   | Detected   | LOC101055722  | 1.235910071 | 0.72774869 | 1.32267633 | 0.7788398 |
| A_55_P1966 | 1304.4  | Detected | 1462.7  | Detected | 1259.8  | Detected | 1612.1  | Detected   | Mef2d         | 1.235893898 | 0.96580803 | 1.10213988 | 0.8612839 |
| A_55_P1969 | 127.6   | Detected | 107.7   | Detected | 118.2   | Detected | 157.7   | Detected   | Mrpl41        | 1.235893417 | 0.92633229 | 1.46425255 | 1.097493  |
| A_55_P1965 | 22346.2 | Detected | 18663.3 | Detected | 29101.8 | Detected | 27616.5 | Detected   | Pnkp          | 1.235847706 | 1.30231538 | 1.47972224 | 1.5593062 |
| A_51_P2162 | 4392.5  | Detected | 4402.3  | Detected | 4960.9  | Detected | 5428.4  | Detected   | Ptk2          | 1.235833808 | 1.12940239 | 1.23308271 | 1.1268882 |
| A_55_P1968 | 2648.9  | Detected | 2674.3  | Detected | 2648.1  | Detected | 3273.6  | Detected   | Rab33b        | 1.235833742 | 0.99969799 | 1.22409603 | 0.990203  |
| A_55_P1956 | 4599.6  | Detected | 5328.6  | Detected | 3680.5  | Detected | 5684.3  | Detected   | Git2          | 1.235824854 | 0.80017828 | 1.06675299 | 0.6907068 |
| A_55_P2045 | 75905.8 | Detected | 47029.9 | Detected | 83274.4 | Detected | 93801.3 | Detected   | Chp1          | 1.235759323 | 1.09707559 | 1.9945035  | 1.7706693 |
| A_55_P2117 | 1008.9  | Detected | 1036    | Detected | 1040.5  | Detected | 1246.6  | Detected   | Vangl2        | 1.235603132 | 1.03132124 | 1.20328185 | 1.0043436 |
| A_55_P2139 | 458.5   | Detected | 386.2   | Detected | 536.7   | Detected | 566.5   | Detected   | Rab6a         | 1.235550709 | 1.17055616 | 1.46685655 | 1.3896945 |
| A_51_P3483 | 2209.7  | Detected | 2643.5  | Detected | 2305.1  | Detected | 2730    | Detected   | Poc1b         | 1.235461827 | 1.04317328 | 1.03272177 | 0.8719879 |
| A_55_P1976 | 146.1   | Detected | 171.9   | Detected | 152.6   | Detected | 180.5   | Detected   | Selplg        | 1.235455168 | 1.04449008 | 1.05002909 | 0.8877254 |
| A_55_P2009 | 341.9   | Detected | 352.7   | Detected | 325.3   | Detected | 422.4   | Detected   | Gm5441        | 1.235448962 | 0.95144779 | 1.19761837 | 0.9223136 |
| A_51_P2125 | 1741.8  | Detected | 1654.8  | Detected | 1670    | Detected | 2151.9  | Detected   | Cog7          | 1.23544609  | 0.95877828 | 1.30039884 | 1.0091854 |
| A_51_P2226 | 33364.5 | Detected | 35913.6 | Detected | 34980.1 | Detected | 41219   | Detected   | Tspo          | 1.235414887 | 1.04842272 | 1.14772677 | 0.9740071 |
| A_55_P1952 | 913.9   | Detected | 639     | Detected | 1243.9  | Detected | 1129    | Detected   | Npb           | 1.23536492  | 1.36108983 | 1.76682316 | 1.9466354 |
| A_52_P4661 | 25.5    | Detected | 25.5    | Detected | 26.1    | Detected | 31.5    | Not Detect | Ints6         | 1.235294118 | 1.02352941 | 1.23529412 | 1.0235294 |
| A_51_P2535 | 460.1   | Detected | 351.2   | Detected | 519.8   | Detected | 568.3   | Detected   | Rffl          | 1.235166268 | 1.1297544  | 1.61816629 | 1.4800683 |
| A_51_P5032 | 1420.4  | Detected | 1542.3  | Detected | 997.8   | Detected | 1754.4  | Detected   | Lrrc8c        | 1.23514503  | 0.70247818 | 1.13752188 | 0.6469558 |
| A_55_P2050 | 8321.2  | Detected | 10773.3 | Detected | 8950    | Detected | 10277.4 | Detected   | Slc25a3       | 1.235086286 | 1.07556602 | 0.95396954 | 0.8307575 |
| A_55_P2086 | 1317.5  | Detected | 1428.1  | Detected | 1228.2  | Detected | 1627.2  | Detected   | Kcnq4         | 1.235066414 | 0.93222011 | 1.13941601 | 0.8600238 |
| A_55_P2247 | 129.8   | Detected | 115.8   | Detected | 114.5   | Detected | 160.3   | Detected   | AI662245      | 1.234976888 | 0.88212635 | 1.38428325 | 0.9887737 |
| A_52_P5263 | 89.8    | Detected | 71      | Detected | 85.1    | Detected | 110.9   | Detected   | Stx3          | 1.234966592 | 0.94766147 | 1.56197183 | 1.1985915 |

|            |         |          |         |          |         |            |         |            |               |             |            |            |           |
|------------|---------|----------|---------|----------|---------|------------|---------|------------|---------------|-------------|------------|------------|-----------|
| A_51_P2422 | 233.3   | Detected | 241.5   | Detected | 242.2   | Detected   | 288.1   | Detected   | Cel           | 1.234890699 | 1.03814831 | 1.19296066 | 1.0028986 |
| A_55_P2103 | 28151.2 | Detected | 33310.5 | Detected | 36918.3 | Detected   | 34762.5 | Detected   | Ndufb5        | 1.234849669 | 1.311429   | 1.04358986 | 1.1083082 |
| A_55_P1955 | 28040.4 | Detected | 34362.8 | Detected | 25526.8 | Detected   | 34621.5 | Detected   | Nup93         | 1.234700646 | 0.91035791 | 1.00752849 | 0.7428615 |
| A_55_P2134 | 35.8    | Detected | 22.4    | Detected | 17.6    | Detected   | 44.2    | Not Detect | Lancl3        | 1.234636872 | 0.49162011 | 1.97321429 | 0.7857143 |
| A_65_P1978 | 1745.2  | Detected | 1330.6  | Detected | 2233.9  | Detected   | 2154.5  | Detected   | Asb7          | 1.234528994 | 1.28002521 | 1.61919435 | 1.6788667 |
| A_55_P2071 | 63415.8 | Detected | 82022.9 | Detected | 95841.9 | Detected   | 78287.8 | Detected   | Erh           | 1.234515689 | 1.51132525 | 0.95446272 | 1.1684773 |
| A_55_P2018 | 5439.6  | Detected | 4847.4  | Detected | 4751.1  | Detected   | 6714.6  | Detected   | Arap1         | 1.234392235 | 0.87342819 | 1.38519619 | 0.9801337 |
| A_51_P4902 | 8599.6  | Detected | 7560.7  | Detected | 7829    | Detected   | 10614.8 | Detected   | Fbxo4         | 1.234336481 | 0.91039118 | 1.40394408 | 1.0354861 |
| A_66_P1210 | 28.6    | Detected | 27.3    | Detected | 19      | Detected   | 35.3    | Not Detect | Mirg          | 1.234265734 | 0.66433566 | 1.29304029 | 0.6959707 |
| A_55_P1957 | 126.4   | Detected | 125.2   | Detected | 150.8   | Detected   | 156     | Detected   | Tns4          | 1.234177215 | 1.19303797 | 1.24600639 | 1.2044728 |
| A_52_P6378 | 603.5   | Detected | 418.2   | Detected | 508.5   | Detected   | 744.8   | Detected   | Prrg4         | 1.234134217 | 0.84258492 | 1.78096604 | 1.2159254 |
| A_51_P2427 | 15471.8 | Detected | 15225.5 | Detected | 17825.7 | Detected   | 19094.2 | Detected   | Tex261        | 1.23412919  | 1.15214132 | 1.25409346 | 1.1707793 |
| A_55_P2158 | 41060.1 | Detected | 54085.6 | Detected | 55399.9 | Detected   | 50672.9 | Detected   | Gm8460        | 1.234115358 | 1.34923929 | 0.93690187 | 1.0243004 |
| A_51_P4309 | 1484.5  | Detected | 1199.2  | Detected | 2071.5  | Detected   | 1832    | Detected   | Paqr7         | 1.234085551 | 1.39541933 | 1.52768512 | 1.7274016 |
| A_55_P2034 | 1308.3  | Detected | 3069.5  | Detected | 1403.6  | Detected   | 1614.5  | Detected   | Pias4         | 1.234044179 | 1.07284262 | 0.52598143 | 0.4572732 |
| A_55_P2109 | 381.2   | Detected | 351.8   | Detected | 386.1   | Detected   | 470.4   | Detected   | Tank          | 1.233997901 | 1.01285414 | 1.33712337 | 1.0974986 |
| A_55_P2132 | 1321.6  | Detected | 1259.1  | Detected | 1098    | Detected   | 1630.7  | Detected   | Bcl2l2        | 1.233883172 | 0.83081114 | 1.29513144 | 0.8720515 |
| A_55_P2000 | 184     | Detected | 262     | Detected | 121.3   | Detected   | 227     | Detected   | 5031439G07Rik | 1.233695652 | 0.65923913 | 0.86641221 | 0.4629771 |
| A_55_P2001 | 2603.6  | Detected | 1674.6  | Detected | 2638    | Detected   | 3211.5  | Detected   | Kitl          | 1.233484406 | 1.01321248 | 1.91777141 | 1.5753016 |
| A_55_P2129 | 8635.5  | Detected | 8797.3  | Detected | 9686.1  | Detected   | 10651.2 | Detected   | AB124611      | 1.233420184 | 1.12166059 | 1.21073511 | 1.101031  |
| A_55_P2122 | 27061.6 | Detected | 31448   | Detected | 33336.6 | Detected   | 33377.3 | Detected   | Zfp259        | 1.233382357 | 1.23187838 | 1.06134889 | 1.0600547 |
| A_55_P2068 | 36      | Detected | 45.8    | Detected | 12.5    | Not Detect | 44.4    | Not Detect | Ccl27a        | 1.233333333 | 0.34722222 | 0.96943231 | 0.2729258 |
| A_52_P1518 | 5973.3  | Detected | 5387.2  | Detected | 7142.6  | Detected   | 7367    | Detected   | Tpd52         | 1.233321615 | 1.19575444 | 1.36750074 | 1.3258465 |
| A_55_P2109 | 235.3   | Detected | 176.8   | Detected | 245.1   | Detected   | 290.2   | Detected   | Hist1h2be     | 1.233319167 | 1.04164896 | 1.64140271 | 1.3863122 |
| A_65_P1235 | 26969.5 | Detected | 30957.1 | Detected | 29096.9 | Detected   | 33261.2 | Detected   | Pin1rt1       | 1.233289457 | 1.0788817  | 1.07442881 | 0.9399104 |
| A_55_P2185 | 34.3    | Detected | 30.5    | Detected | 23.4    | Detected   | 42.3    | Not Detect | Masp2         | 1.233236152 | 0.68221574 | 1.38688525 | 0.7672131 |
| A_55_P2165 | 2332.5  | Detected | 1857.4  | Detected | 1171.1  | Detected   | 2876.5  | Detected   | Zbtb4         | 1.233226152 | 0.50207931 | 1.54867018 | 0.630505  |
| A_55_P2117 | 36.9    | Detected | 40      | Detected | 30.9    | Detected   | 45.5    | Not Detect | BC005764      | 1.233062331 | 0.83739837 | 1.1375     | 0.7725    |
| A_51_P4438 | 754     | Detected | 928.4   | Detected | 714.4   | Detected   | 929.7   | Detected   | Slu7          | 1.233023873 | 0.94748011 | 1.00140026 | 0.7694959 |
| A_51_P2577 | 23988.6 | Detected | 32226.9 | Detected | 34733.2 | Detected   | 29577.8 | Detected   | Dnajc22       | 1.232994005 | 1.44790442 | 0.91779849 | 1.0777704 |
| A_65_P1944 | 188.9   | Detected | 230.6   | Detected | 188.4   | Detected   | 232.9   | Detected   | Tatdn1        | 1.232927475 | 0.9973531  | 1.00997398 | 0.8169991 |
| A_55_P2043 | 1251.2  | Detected | 890.6   | Detected | 1616.9  | Detected   | 1542.5  | Detected   | N6amt1        | 1.232816496 | 1.29227941 | 1.73197844 | 1.8155176 |
| A_55_P2174 | 30.5    | Detected | 40.5    | Detected | 29.3    | Detected   | 37.6    | Not Detect | Nuf2          | 1.232786885 | 0.96065574 | 0.92839506 | 0.7234568 |
| A_55_P1962 | 28309.3 | Detected | 29061.7 | Detected | 25511.9 | Detected   | 34897   | Detected   | Trim41        | 1.232704447 | 0.90118442 | 1.20079004 | 0.877853  |
| A_51_P3411 | 853.7   | Detected | 601     | Detected | 840.1   | Detected   | 1052.3  | Detected   | Ddah2         | 1.232634415 | 0.98406935 | 1.75091514 | 1.3978369 |
| A_55_P2120 | 1545.1  | Detected | 1550.1  | Detected | 1749.2  | Detected   | 1904.5  | Detected   | Zfp282        | 1.232606304 | 1.13209501 | 1.22863041 | 1.1284433 |
| A_55_P2335 | 4444    | Detected | 5202.3  | Detected | 3869    | Detected   | 5477.7  | Detected   | Nlgn3         | 1.232605761 | 0.87061206 | 1.05293812 | 0.7437095 |
| A_66_P1116 | 21.5    | Detected | 22.8    | Detected | 13.8    | Not Detect | 26.5    | Not Detect | Dnah14        | 1.23255814  | 0.64186047 | 1.1622807  | 0.6052632 |
| A_52_P4454 | 1914.3  | Detected | 1700    | Detected | 1142    | Detected   | 2359.1  | Detected   | Lmtk2         | 1.232356475 | 0.59656271 | 1.38770588 | 0.6717647 |
| A_51_P2338 | 147.2   | Detected | 144.5   | Detected | 165.7   | Detected   | 181.4   | Detected   | Adprhl1       | 1.232336957 | 1.12567935 | 1.25536332 | 1.1467128 |

|            |          |          |          |          |          |            |          |            |               |             |            |            |           |
|------------|----------|----------|----------|----------|----------|------------|----------|------------|---------------|-------------|------------|------------|-----------|
| A_55_P2339 | 333.6    | Detected | 416      | Detected | 355.6    | Detected   | 411.1    | Detected   | Sass6         | 1.232314149 | 1.06594724 | 0.98822115 | 0.8548077 |
| A_55_P2007 | 8630.2   | Detected | 8796.1   | Detected | 8450.3   | Detected   | 10635.1  | Detected   | Tmem215       | 1.232312113 | 0.9791546  | 1.20906993 | 0.9606871 |
| A_66_P1290 | 12375.3  | Detected | 14047.9  | Detected | 10881.4  | Detected   | 15249.8  | Detected   | 2610002J02Rik | 1.232277197 | 0.87928373 | 1.08555727 | 0.7745926 |
| A_55_P2214 | 104.2    | Detected | 125.9    | Detected | 138.3    | Detected   | 128.4    | Detected   | Irs3          | 1.232245681 | 1.32725528 | 1.01985703 | 1.0984909 |
| A_51_P1080 | 137.9    | Detected | 246.7    | Detected | 86.4     | Detected   | 169.9    | Detected   | Zmynd15       | 1.232052212 | 0.62654097 | 0.68869072 | 0.3502229 |
| A_55_P1953 | 42866.3  | Detected | 46929.2  | Detected | 53098.6  | Detected   | 52813.1  | Detected   | Copz1         | 1.23204242  | 1.23870266 | 1.12537823 | 1.1314619 |
| A_52_P4639 | 8801.8   | Detected | 8489     | Detected | 6749.5   | Detected   | 10843.9  | Detected   | Tmem140       | 1.232009362 | 0.76683178 | 1.27740605 | 0.7950878 |
| A_52_P5525 | 484.7    | Detected | 761.6    | Detected | 801      | Detected   | 597.1    | Detected   | Map4k1        | 1.231896018 | 1.6525686  | 0.78400735 | 1.0517332 |
| A_55_P2041 | 170897.1 | Detected | 188554.7 | Detected | 165324.8 | Detected   | 210489.6 | Detected   | Utp6          | 1.231674499 | 0.96739383 | 1.11633176 | 0.8768002 |
| A_55_P2139 | 594.4    | Detected | 611.3    | Detected | 605.5    | Detected   | 732.1    | Detected   | Odf2l         | 1.23166218  | 1.01867429 | 1.19761165 | 0.990512  |
| A_55_P2058 | 28249.1  | Detected | 22208.9  | Detected | 30106.4  | Detected   | 34789.8  | Detected   | Mvk           | 1.23153658  | 1.06574723 | 1.5664801  | 1.3556007 |
| A_51_P3801 | 18362.5  | Detected | 14743.5  | Detected | 15416.9  | Detected   | 22613.3  | Detected   | Ubr4          | 1.231493533 | 0.83958611 | 1.53378099 | 1.0456744 |
| A_66_P1292 | 361.2    | Detected | 390.9    | Detected | 369.3    | Detected   | 444.8    | Detected   | Lekr1         | 1.23145072  | 1.02242525 | 1.13788693 | 0.9447429 |
| A_52_P5562 | 14336.1  | Detected | 12355.7  | Detected | 13872.5  | Detected   | 17654.2  | Detected   | G3bp2         | 1.231450673 | 0.96766206 | 1.42883042 | 1.1227612 |
| A_66_P1309 | 205.3    | Detected | 63.2     | Detected | 380.1    | Detected   | 252.8    | Detected   | Proser2       | 1.231368729 | 1.85143692 | 4          | 6.0142405 |
| A_51_P3716 | 4478.6   | Detected | 5694.4   | Detected | 4468.4   | Detected   | 5514.5   | Detected   | Slc7a6os      | 1.23129996  | 0.9977225  | 0.96840756 | 0.7847008 |
| A_51_P5043 | 2935.4   | Detected | 3372.1   | Detected | 3042.3   | Detected   | 3614     | Detected   | Prpf38b       | 1.231178034 | 1.03641752 | 1.07173571 | 0.9021974 |
| A_55_P2102 | 5395.6   | Detected | 4652.8   | Detected | 5114.8   | Detected   | 6642.6   | Detected   | Usp4          | 1.231114241 | 0.9479576  | 1.42765646 | 1.099295  |
| A_55_P2055 | 10405.9  | Detected | 10812.5  | Detected | 9255.8   | Detected   | 12810.4  | Detected   | Gm5878        | 1.231070835 | 0.88947616 | 1.18477688 | 0.8560277 |
| A_55_P2051 | 11158.5  | Detected | 11873.1  | Detected | 11836.9  | Detected   | 13736.9  | Detected   | LOC101055680  | 1.231070484 | 1.0607967  | 1.1569767  | 0.9969511 |
| A_55_P1957 | 229.4    | Detected | 185.2    | Detected | 326.6    | Detected   | 282.4    | Detected   | Bbip1         | 1.231037489 | 1.42371404 | 1.52483801 | 1.7634989 |
| A_55_P2154 | 346.7    | Detected | 311.4    | Detected | 326.3    | Detected   | 426.8    | Detected   | 1700008J07Rik | 1.231035477 | 0.9411595  | 1.37058446 | 1.0478484 |
| A_51_P1572 | 8235     | Detected | 8102.7   | Detected | 6913.3   | Detected   | 10136.7  | Detected   | Efcab14       | 1.230928962 | 0.83950213 | 1.25102744 | 0.8532094 |
| A_55_P2034 | 1841     | Detected | 1614.3   | Detected | 1825.6   | Detected   | 2266     | Detected   | Usp28         | 1.230852797 | 0.99163498 | 1.40370439 | 1.1308926 |
| A_55_P1993 | 7777.5   | Detected | 8632.5   | Detected | 7753.2   | Detected   | 9572.8   | Detected   | Efr3a         | 1.23083253  | 0.9968756  | 1.10892557 | 0.8981407 |
| A_55_P2125 | 6651.2   | Detected | 4766.2   | Detected | 9439.7   | Detected   | 8186.3   | Detected   | Agpat2        | 1.230800457 | 1.41924765 | 1.71757375 | 1.9805505 |
| A_51_P1126 | 59.8     | Detected | 54.3     | Detected | 66.9     | Detected   | 73.6     | Detected   | Olfr159       | 1.230769231 | 1.1187291  | 1.35543278 | 1.2320442 |
| A_51_P3591 | 230.6    | Detected | 17.8     | Detected | 3.3      | Not Detect | 283.8    | Detected   | Syt7          | 1.230702515 | 0.01431049 | 15.9438202 | 0.1853933 |
| A_51_P1364 | 202      | Detected | 218.2    | Detected | 343.6    | Detected   | 248.6    | Detected   | Nudt12        | 1.230693069 | 1.7009901  | 1.13932172 | 1.5747021 |
| A_51_P2981 | 37866.5  | Detected | 41364.4  | Detected | 37050.2  | Detected   | 46600.7  | Detected   | Dctn3         | 1.230657705 | 0.97844269 | 1.12658953 | 0.8957026 |
| A_51_P4969 | 880      | Detected | 736.5    | Detected | 963      | Detected   | 1082.9   | Detected   | Hps3          | 1.230568182 | 1.09431818 | 1.47033265 | 1.3075356 |
| A_55_P2002 | 16557.6  | Detected | 13519.5  | Detected | 18215.5  | Detected   | 20374.9  | Detected   | Vps26a        | 1.230546698 | 1.10012925 | 1.50707497 | 1.3473501 |
| A_55_P2138 | 1849.1   | Detected | 1361.2   | Detected | 1909.1   | Detected   | 2275.4   | Detected   | Mad211        | 1.230544589 | 1.03244822 | 1.67161328 | 1.4025125 |
| A_55_P2002 | 2592     | Detected | 2174.9   | Detected | 5489.8   | Detected   | 3189.5   | Detected   | Cystm1        | 1.230516975 | 2.1179784  | 1.46650421 | 2.524162  |
| A_52_P4903 | 49.9     | Detected | 37.4     | Detected | 42.5     | Detected   | 61.4     | Detected   | Sbf2          | 1.230460922 | 0.85170341 | 1.64171123 | 1.1363636 |
| A_51_P3819 | 24.3     | Detected | 36.4     | Detected | 13.3     | Not Detect | 29.9     | Not Detect | Hmx1          | 1.230452675 | 0.5473251  | 0.82142857 | 0.3653846 |
| A_55_P1972 | 999.8    | Detected | 905.2    | Detected | 809.7    | Detected   | 1230.2   | Detected   | Stil          | 1.230446089 | 0.80986197 | 1.35903668 | 0.8944985 |
| A_55_P2022 | 591.1    | Detected | 615.2    | Detected | 652.3    | Detected   | 727.3    | Detected   | Cyp4f17       | 1.230417865 | 1.10353578 | 1.18221717 | 1.0603056 |
| A_51_P1839 | 1946.1   | Detected | 1934.2   | Detected | 2173.1   | Detected   | 2394.5   | Detected   | Barhl1        | 1.230409537 | 1.11664354 | 1.23797953 | 1.1235136 |
| A_55_P2010 | 24633.6  | Detected | 22181.7  | Detected | 22971.5  | Detected   | 30309    | Detected   | Gm4971        | 1.230392634 | 0.93252712 | 1.36639662 | 1.0356059 |

|            |                  |                  |                  |                   |                |             |            |            |           |
|------------|------------------|------------------|------------------|-------------------|----------------|-------------|------------|------------|-----------|
| A_55_P2000 | 17.8 Detected    | 9.1 Not Detect   | 18.5 Detected    | 21.9 Not Detect   | Irf1           | 1.230337079 | 1.03932584 | 2.40659341 | 2.032967  |
| A_55_P2131 | 95.1 Detected    | 126.3 Detected   | 125.8 Detected   | 117 Detected      | Sv2c           | 1.230283912 | 1.32281809 | 0.9263658  | 0.9960412 |
| A_52_P8041 | 30.4 Detected    | 24.4 Detected    | 51.2 Detected    | 37.4 Not Detect   | 9130023H24Rik  | 1.230263158 | 1.68421053 | 1.53278689 | 2.0983607 |
| A_51_P2166 | 74.7 Detected    | 65.1 Detected    | 156.9 Detected   | 91.9 Detected     | Hbp1           | 1.230254351 | 2.10040161 | 1.41167435 | 2.4101382 |
| A_55_P1987 | 93.4 Detected    | 53.1 Detected    | 64.6 Detected    | 114.9 Detected    | Fam196a        | 1.230192719 | 0.69164882 | 2.16384181 | 1.2165725 |
| A_55_P2019 | 23.9 Detected    | 21.6 Detected    | 16.9 Detected    | 29.4 Not Detect   | Aim1l          | 1.230125523 | 0.70711297 | 1.36111111 | 0.7824074 |
| A_55_P2030 | 94.3 Detected    | 104.6 Detected   | 84 Detected      | 116 Detected      | Ifna2          | 1.230116649 | 0.89077413 | 1.10898662 | 0.8030593 |
| A_65_P0106 | 3001.8 Detected  | 3244.3 Detected  | 4148.1 Detected  | 3692.5 Detected   | Phf14          | 1.230095276 | 1.38187088 | 1.13814999 | 1.2785809 |
| A_55_P2140 | 2052.2 Detected  | 522.7 Detected   | 1129.3 Detected  | 2524.4 Detected   | Dmkn           | 1.230094533 | 0.5502875  | 4.82953893 | 2.1605127 |
| A_55_P2096 | 1695.9 Detected  | 1749.4 Detected  | 1624.8 Detected  | 2086.1 Detected   | Tsc22d4        | 1.230084321 | 0.95807536 | 1.19246599 | 0.9287756 |
| A_66_P1060 | 32.6 Detected    | 35.6 Detected    | 34.1 Detected    | 40.1 Not Detect   | Dtx3l          | 1.23006135  | 1.04601227 | 1.12640449 | 0.9578652 |
| A_52_P4106 | 396.9 Detected   | 412.6 Detected   | 421.5 Detected   | 488.2 Detected    | Trp73          | 1.230032754 | 1.06198035 | 1.18322831 | 1.0215705 |
| A_52_P2189 | 538.2 Detected   | 922.7 Detected   | 356.5 Detected   | 662 Detected      | Cyld           | 1.230026013 | 0.66239316 | 0.71745963 | 0.3863661 |
| A_55_P2083 | 94.4 Detected    | 79.4 Detected    | 163.4 Detected   | 116.1 Detected    | Ranbp6         | 1.229872881 | 1.7309322  | 1.46221662 | 2.0579345 |
| A_55_P2000 | 4178.3 Detected  | 3381.1 Detected  | 4177.2 Detected  | 5138.4 Detected   | Ccnyl1         | 1.229782447 | 0.99973674 | 1.5197421  | 1.2354559 |
| A_51_P3700 | 1877.6 Detected  | 1961.8 Detected  | 2122.4 Detected  | 2309 Detected     | Nagpa          | 1.229761398 | 1.13037921 | 1.17698032 | 1.0818636 |
| A_55_P2207 | 433.5 Detected   | 428.1 Detected   | 383.6 Detected   | 533.1 Detected    | Nron           | 1.229757785 | 0.88489043 | 1.2452698  | 0.8960523 |
| A_52_P6418 | 712.5 Detected   | 731.2 Detected   | 1108 Detected    | 876.2 Detected    | Khnyln         | 1.229754386 | 1.55508772 | 1.19830416 | 1.5153173 |
| A_52_P2635 | 7.4 Not Detect   | 165 Detected     | 4.4 Not Detect   | 9.1 Not Detect    | Gng2           | 1.22972973  | 0.59459459 | 0.05515152 | 0.0266667 |
| A_55_P1986 | 13590 Detected   | 9364.8 Detected  | 14636.5 Detected | 16711.9 Detected  | Prr14          | 1.229720383 | 1.07700515 | 1.78454425 | 1.5629271 |
| A_52_P6733 | 191.2 Detected   | 161.8 Detected   | 242.9 Detected   | 235.1 Detected    | 2610044O15Rik8 | 1.22960251  | 1.27039749 | 1.45302843 | 1.5012361 |
| A_55_P2077 | 5277.4 Detected  | 4467 Detected    | 5616 Detected    | 6488.9 Detected   | Deaf1          | 1.2295638   | 1.06416038 | 1.4526304  | 1.2572196 |
| A_66_P1032 | 13619.6 Detected | 12388.2 Detected | 15562.6 Detected | 16744.4 Detected  | Irf2bp2        | 1.229434051 | 1.14266205 | 1.35164108 | 1.2562438 |
| A_52_P2203 | 585.4 Detected   | 543.2 Detected   | 599.1 Detected   | 719.7 Detected    | Ufd1l          | 1.229415784 | 1.0234028  | 1.32492636 | 1.1029087 |
| A_52_P6492 | 1520.1 Detected  | 2273.9 Detected  | 1663 Detected    | 1868.8 Detected   | Cdc26          | 1.229392803 | 1.09400697 | 0.82184793 | 0.7313426 |
| A_55_P2122 | 10374.3 Detected | 2592.4 Detected  | 11082.6 Detected | 12752.4 Detected  | Klf4           | 1.229229924 | 1.06827449 | 4.91914828 | 4.2750347 |
| A_55_P1959 | 779 Detected     | 687.3 Detected   | 742.4 Detected   | 957.5 Detected    | Alas1          | 1.229139923 | 0.95301669 | 1.39313255 | 1.0801688 |
| A_55_P2020 | 14722.9 Detected | 14555.8 Detected | 18499.9 Detected | 18095.6 Detected  | Iscu           | 1.22907851  | 1.25653913 | 1.24318828 | 1.2709642 |
| A_55_P1971 | 86.9 Detected    | 83.2 Detected    | 82 Detected      | 106.8 Detected    | 4932438A13Rik  | 1.228998849 | 0.94361335 | 1.28365385 | 0.9855769 |
| A_52_P8942 | 6206.1 Detected  | 6168.5 Detected  | 4377 Detected    | 7627.2 Detected   | Pcnt           | 1.228984386 | 0.70527384 | 1.23647564 | 0.7095728 |
| A_55_P2007 | 83859.6 Detected | 60484.2 Detected | 93516 Detected   | 103057.7 Detected | Epn1           | 1.228931452 | 1.11514961 | 1.70387804 | 1.5461228 |
| A_55_P2061 | 4612.3 Detected  | 4482.4 Detected  | 6118.6 Detected  | 5668.1 Detected   | Osgep          | 1.228909655 | 1.32658327 | 1.26452347 | 1.3650277 |
| A_55_P2061 | 40235.8 Detected | 39399.9 Detected | 52285.9 Detected | 49442.3 Detected  | Ndufc2         | 1.228813644 | 1.29948702 | 1.2548839  | 1.3270567 |
| A_66_P1128 | 21529 Detected   | 19220.5 Detected | 24373.4 Detected | 26453.6 Detected  | AI413582       | 1.228742626 | 1.13211947 | 1.37632216 | 1.268094  |
| A_55_P2105 | 2929 Detected    | 3325.9 Detected  | 2402.8 Detected  | 3598.9 Detected   | Ppp2r5c        | 1.228712871 | 0.82034824 | 1.08208305 | 0.7224511 |
| A_55_P1976 | 2574.1 Detected  | 2510.4 Detected  | 4057.9 Detected  | 3162.7 Detected   | Zfp707         | 1.228662445 | 1.57643448 | 1.25983907 | 1.6164356 |
| A_55_P2153 | 32.8 Detected    | 26.6 Detected    | 29 Detected      | 40.3 Not Detect   | Zap70          | 1.228658537 | 0.88414634 | 1.51503759 | 1.0902256 |
| A_55_P2362 | 14 Not Detect    | 28.9 Detected    | 8.9 Not Detect   | 17.2 Not Detect   | AI836737       | 1.228571429 | 0.63571429 | 0.59515571 | 0.3079585 |
| A_55_P2087 | 44.2 Detected    | 43.3 Detected    | 53.9 Detected    | 54.3 Detected     | Oprm1          | 1.228506787 | 1.21945701 | 1.25404157 | 1.2448037 |
| A_55_P1980 | 1200 Detected    | 1390 Detected    | 1166.2 Detected  | 1474.2 Detected   | Hace1          | 1.2285      | 0.97183333 | 1.06057554 | 0.8389928 |



|            |          |            |          |            |          |            |          |            |               |             |            |            |           |
|------------|----------|------------|----------|------------|----------|------------|----------|------------|---------------|-------------|------------|------------|-----------|
| A_55_P2129 | 316      | Detected   | 367.8    | Detected   | 226.4    | Detected   | 388.2    | Detected   | Gm9519        | 1.228481013 | 0.7164557  | 1.05546493 | 0.6155519 |
| A_51_P3468 | 10469.3  | Detected   | 12895.5  | Detected   | 12308.3  | Detected   | 12860    | Detected   | Ift20         | 1.228353376 | 1.17565644 | 0.9972471  | 0.9544647 |
| A_55_P1972 | 241.8    | Detected   | 240.4    | Detected   | 233.5    | Detected   | 297      | Detected   | Smok3b        | 1.228287841 | 0.96567411 | 1.23544093 | 0.9712978 |
| A_55_P2135 | 103.5    | Detected   | 101.6    | Detected   | 79       | Detected   | 127.1    | Detected   | Setdb2        | 1.228019324 | 0.76328502 | 1.25098425 | 0.7775591 |
| A_55_P2091 | 105.7    | Detected   | 127.2    | Detected   | 101.4    | Detected   | 129.8    | Detected   | 2210015D19Rik | 1.228003784 | 0.95931883 | 1.02044025 | 0.7971698 |
| A_55_P2304 | 27.2     | Detected   | 19.4     | Detected   | 18       | Detected   | 33.4     | Not Detect | Hoxa3         | 1.227941176 | 0.66176471 | 1.72164948 | 0.9278351 |
| A_52_P3829 | 88560.6  | Detected   | 73220    | Detected   | 57087    | Detected   | 108744.7 | Detected   | Trip6         | 1.227912864 | 0.64460945 | 1.48517755 | 0.779664  |
| A_51_P5021 | 8708.4   | Detected   | 14343.2  | Detected   | 11040.8  | Detected   | 10693.1  | Detected   | Slc19a1       | 1.227906389 | 1.26783336 | 0.74551704 | 0.7697585 |
| A_55_P1966 | 7.9      | Not Detect | 18.4     | Detected   | 3.4      | Not Detect | 9.7      | Not Detect | Gm9839        | 1.227848101 | 0.43037975 | 0.52717391 | 0.1847826 |
| A_51_P3967 | 7185.2   | Detected   | 7684.5   | Detected   | 8836.4   | Detected   | 8822.3   | Detected   | Med21         | 1.227843345 | 1.22980571 | 1.14806429 | 1.1498991 |
| A_51_P4587 | 205      | Detected   | 216      | Detected   | 234.1    | Detected   | 251.7    | Detected   | Zfp438        | 1.227804878 | 1.14195122 | 1.16527778 | 1.0837963 |
| A_51_P2471 | 22790    | Detected   | 18150.1  | Detected   | 23416.4  | Detected   | 27981.3  | Detected   | Hn1           | 1.227788504 | 1.02748574 | 1.54166093 | 1.2901527 |
| A_55_P2351 | 79.9     | Detected   | 62.2     | Detected   | 68.9     | Detected   | 98.1     | Detected   | 3300002P13Rik | 1.227784731 | 0.86232791 | 1.57717042 | 1.107717  |
| A_55_P2019 | 18       | Detected   | 18.4     | Not Detect | 21.2     | Detected   | 22.1     | Not Detect | Col19a1       | 1.227777778 | 1.17777778 | 1.20108696 | 1.1521739 |
| A_51_P2810 | 492881.4 | Detected   | 542152   | Detected   | 567865.1 | Detected   | 605102.3 | Detected   | S100a6        | 1.227683374 | 1.15213335 | 1.1161119  | 1.0474278 |
| A_52_P2223 | 49961.2  | Detected   | 43348.5  | Detected   | 42595.5  | Detected   | 61333.1  | Detected   | Flnb          | 1.227614629 | 0.8525716  | 1.41488402 | 0.9826292 |
| A_51_P4982 | 608.3    | Detected   | 602.2    | Detected   | 539.1    | Detected   | 746.7    | Detected   | Ube2j1        | 1.227519316 | 0.88624034 | 1.2399535  | 0.8952175 |
| A_55_P2186 | 48487.9  | Detected   | 56649.7  | Detected   | 47340    | Detected   | 59519.8  | Detected   | Sub1          | 1.227518618 | 0.97632605 | 1.05066399 | 0.835662  |
| A_55_P2018 | 4763.2   | Detected   | 6510.2   | Detected   | 4895.1   | Detected   | 5846.5   | Detected   | Hmgb1         | 1.227431139 | 1.02769147 | 0.89805229 | 0.7519124 |
| A_51_P2387 | 2549.1   | Detected   | 2390.7   | Detected   | 2116.8   | Detected   | 3128.8   | Detected   | Mfsd11        | 1.227413597 | 0.83041073 | 1.30873803 | 0.885431  |
| A_66_P1089 | 22       | Detected   | 20.9     | Detected   | 19.3     | Detected   | 27       | Not Detect | Tcrg-V7       | 1.227272727 | 0.87727273 | 1.29186603 | 0.923445  |
| A_55_P2002 | 24872.5  | Detected   | 36007    | Detected   | 24304.8  | Detected   | 30525.3  | Detected   | Srm           | 1.227271083 | 0.9771756  | 0.84776016 | 0.6750021 |
| A_51_P4247 | 669.7    | Detected   | 667.3    | Detected   | 683.2    | Detected   | 821.9    | Detected   | Wdr54         | 1.22726594  | 1.02015828 | 1.2316799  | 1.0238274 |
| A_52_P3746 | 2896.4   | Detected   | 3592     | Detected   | 3732.8   | Detected   | 3554.3   | Detected   | Kdm5a         | 1.227144041 | 1.28877227 | 0.98950445 | 1.0391982 |
| A_51_P1224 | 277.8    | Detected   | 518.3    | Detected   | 323.2    | Detected   | 340.9    | Detected   | Ctf1          | 1.227141829 | 1.16342693 | 0.65772719 | 0.6235771 |
| A_55_P2129 | 7383.3   | Detected   | 6424.2   | Detected   | 10630    | Detected   | 9060.2   | Detected   | 2210016L21Rik | 1.227120664 | 1.43973562 | 1.41032346 | 1.6546807 |
| A_55_P2092 | 234736.5 | Detected   | 242048.3 | Detected   | 244557.9 | Detected   | 288044.7 | Detected   | Tmsb10        | 1.227098044 | 1.04184011 | 1.19002984 | 1.0103682 |
| A_55_P1997 | 131.7    | Detected   | 136.6    | Detected   | 125.1    | Detected   | 161.6    | Detected   | Ccdc142       | 1.227031131 | 0.9498861  | 1.18301611 | 0.9158126 |
| A_55_P2129 | 4275     | Detected   | 4523.6   | Detected   | 4805.1   | Detected   | 5245.4   | Detected   | Capn11        | 1.226994152 | 1.124      | 1.15956318 | 1.0622292 |
| A_51_P1506 | 28099.1  | Detected   | 31798.7  | Detected   | 42597.9  | Detected   | 34475.9  | Detected   | Jagn1         | 1.226939653 | 1.51598806 | 1.08419212 | 1.3396114 |
| A_55_P1960 | 31551    | Detected   | 24805.7  | Detected   | 33010    | Detected   | 38710.7  | Detected   | Pafah1b3      | 1.226924662 | 1.04624259 | 1.56055665 | 1.3307425 |
| A_55_P1966 | 90466.7  | Detected   | 111005.2 | Detected   | 126419.9 | Detected   | 110994.9 | Detected   | Erh           | 1.226914434 | 1.39741916 | 0.99990721 | 1.1388647 |
| A_51_P2425 | 839.7    | Detected   | 1006.2   | Detected   | 1073.2   | Detected   | 1030.2   | Detected   | Shq1          | 1.226866738 | 1.2780755  | 1.02385212 | 1.0665872 |
| A_55_P2053 | 113.3    | Detected   | 195.2    | Detected   | 169.7    | Detected   | 139      | Detected   | A730020M07Rik | 1.226831421 | 1.49779347 | 0.71209016 | 0.8693648 |
| A_51_P3471 | 10628.6  | Detected   | 10011.3  | Detected   | 12391.2  | Detected   | 13039.5  | Detected   | Snx2          | 1.226831379 | 1.16583558 | 1.3024782  | 1.2377214 |
| A_51_P1822 | 7303.4   | Detected   | 7414.3   | Detected   | 7982.8   | Detected   | 8959.9   | Detected   | Ccdc53        | 1.22681217  | 1.09302517 | 1.20846203 | 1.0766762 |
| A_55_P1990 | 2177.7   | Detected   | 2664.9   | Detected   | 1618.3   | Detected   | 2671.6   | Detected   | Banp          | 1.226798916 | 0.74312348 | 1.00251417 | 0.6072648 |
| A_52_P3365 | 299.4    | Detected   | 309.1    | Detected   | 348.9    | Detected   | 367.3    | Detected   | Als2          | 1.226786907 | 1.16533066 | 1.18828858 | 1.1287609 |
| A_55_P2075 | 102.3    | Detected   | 118      | Detected   | 60.4     | Detected   | 125.5    | Detected   | Gm13286       | 1.226783969 | 0.59042033 | 1.06355932 | 0.5118644 |
| A_55_P2143 | 10382.9  | Detected   | 10127.4  | Detected   | 11713.4  | Detected   | 12735.7  | Detected   | Rpain         | 1.226603357 | 1.12814339 | 1.25754883 | 1.1566049 |

|            |         |          |         |          |          |          |         |            |               |             |            |            |           |
|------------|---------|----------|---------|----------|----------|----------|---------|------------|---------------|-------------|------------|------------|-----------|
| A_51_P5070 | 6661.7  | Detected | 8166    | Detected | 4996.1   | Detected | 8170.5  | Detected   | Nt5dc3        | 1.226488734 | 0.74997373 | 1.00055107 | 0.6118173 |
| A_55_P2074 | 4136    | Detected | 3289.6  | Detected | 3718.4   | Detected | 5072.7  | Detected   | Ap2b1         | 1.226474855 | 0.89903288 | 1.54204159 | 1.1303502 |
| A_55_P2114 | 173.1   | Detected | 132.6   | Detected | 189.1    | Detected | 212.3   | Detected   | Kcnk16        | 1.226458694 | 1.09243212 | 1.60105581 | 1.4260935 |
| A_55_P2175 | 5619.3  | Detected | 5275.5  | Detected | 7117.2   | Detected | 6891.7  | Detected   | Hmbox1        | 1.226433897 | 1.26656345 | 1.30635959 | 1.3491044 |
| A_51_P1437 | 42.4    | Detected | 38.1    | Detected | 37.3     | Detected | 52      | Detected   | Tdh           | 1.226415094 | 0.87971698 | 1.3648294  | 0.9790026 |
| A_55_P2007 | 81546.1 | Detected | 43254.7 | Detected | 108817.6 | Detected | 100009  | Detected   | Rnf128        | 1.226410582 | 1.33443046 | 2.31209556 | 2.5157405 |
| A_51_P3774 | 787.2   | Detected | 974.9   | Detected | 977.5    | Detected | 965.4   | Detected   | Mettl14       | 1.226371951 | 1.24174289 | 0.99025541 | 1.0026669 |
| A_55_P1955 | 459.9   | Detected | 495.4   | Detected | 439.9    | Detected | 564     | Detected   | Gm4881        | 1.226353555 | 0.95651229 | 1.13847396 | 0.8879693 |
| A_55_P2022 | 165.7   | Detected | 225.4   | Detected | 202.7    | Detected | 203.2   | Detected   | Uncx          | 1.226312613 | 1.22329511 | 0.90150843 | 0.8992902 |
| A_66_P1054 | 3876.3  | Detected | 1563    | Detected | 2954.3   | Detected | 4753.5  | Detected   | Lonrf3        | 1.226298274 | 0.76214431 | 3.04126679 | 1.8901472 |
| A_52_P5316 | 2174.6  | Detected | 1638.9  | Detected | 2981     | Detected | 2666.6  | Detected   | Ttc9c         | 1.226248505 | 1.37082682 | 1.62706694 | 1.8189029 |
| A_51_P3818 | 27104.2 | Detected | 25288.7 | Detected | 29312.6  | Detected | 33235.6 | Detected   | Bub3          | 1.226215863 | 1.08147815 | 1.31424707 | 1.1591185 |
| A_51_P2400 | 15322.9 | Detected | 16113   | Detected | 12513.5  | Detected | 18788.9 | Detected   | Gyg           | 1.226197391 | 0.81665351 | 1.16607087 | 0.7766089 |
| A_55_P2170 | 1588.6  | Detected | 875     | Detected | 1518.7   | Detected | 1947.9  | Detected   | Ankrd13d      | 1.22617399  | 0.95599899 | 2.22617143 | 1.7356571 |
| A_55_P1995 | 70.3    | Detected | 68.1    | Detected | 57.5     | Detected | 86.2    | Detected   | Drp2          | 1.226173542 | 0.81792319 | 1.26578561 | 0.8443465 |
| A_55_P2131 | 152.1   | Detected | 119.7   | Detected | 118.4    | Detected | 186.5   | Detected   | Mical2        | 1.226166995 | 0.77843524 | 1.55806182 | 0.9891395 |
| A_66_P1123 | 158.8   | Detected | 156     | Detected | 152.4    | Detected | 194.7   | Detected   | Cacna1i       | 1.226070529 | 0.95969773 | 1.24807692 | 0.9769231 |
| A_55_P2153 | 2553.7  | Detected | 2666.4  | Detected | 3904.1   | Detected | 3130.9  | Detected   | Tatdn3        | 1.226024983 | 1.52880135 | 1.17420492 | 1.4641839 |
| A_55_P1980 | 33.2    | Detected | 43.9    | Detected | 21.7     | Detected | 40.7    | Not Detect | Cbx7          | 1.225903614 | 0.65361446 | 0.92710706 | 0.4943052 |
| A_55_P2052 | 51.8    | Detected | 54.4    | Detected | 62.4     | Detected | 63.5    | Detected   | Olf1382       | 1.225868726 | 1.2046332  | 1.16727941 | 1.1470588 |
| A_66_P1341 | 250.6   | Detected | 214.4   | Detected | 251.2    | Detected | 307.2   | Detected   | Aym1          | 1.225857941 | 1.00239425 | 1.43283582 | 1.1716418 |
| A_55_P1993 | 5347.7  | Detected | 4020.2  | Detected | 3387.6   | Detected | 6555.4  | Detected   | D5Erd579e     | 1.225835406 | 0.63346859 | 1.63061539 | 0.8426446 |
| A_55_P1984 | 311.4   | Detected | 289.9   | Detected | 310.2    | Detected | 381.7   | Detected   | Smarcc1       | 1.225754656 | 0.99614644 | 1.31666092 | 1.0700241 |
| A_55_P2065 | 35      | Detected | 32.5    | Detected | 39.9     | Detected | 42.9    | Not Detect | Olf1500       | 1.225714286 | 1.14       | 1.32       | 1.2276923 |
| A_55_P1955 | 7694.9  | Detected | 8233.4  | Detected | 8666.1   | Detected | 9431.2  | Detected   | Ptpn5         | 1.225642958 | 1.12621347 | 1.1454806  | 1.0525542 |
| A_55_P2085 | 1556.9  | Detected | 1440.8  | Detected | 1737.3   | Detected | 1908.2  | Detected   | Nsa2          | 1.225640696 | 1.11587128 | 1.32440311 | 1.2057885 |
| A_55_P2049 | 135.2   | Detected | 123.7   | Detected | 159.4    | Detected | 165.7   | Detected   | 1700023D09Rik | 1.225591716 | 1.17899408 | 1.33953112 | 1.2886015 |
| A_55_P1979 | 33221.2 | Detected | 26451.6 | Detected | 26604.7  | Detected | 40711.8 | Detected   | Pitrm1        | 1.225476503 | 0.80083501 | 1.53910538 | 1.0057879 |
| A_51_P3461 | 27.5    | Detected | 32.2    | Detected | 32.7     | Detected | 33.7    | Not Detect | Rhox9         | 1.225454545 | 1.18909091 | 1.04658385 | 1.015528  |
| A_51_P3144 | 1765    | Detected | 1719.2  | Detected | 1571.4   | Detected | 2162.8  | Detected   | Blm           | 1.225382436 | 0.89031161 | 1.25802699 | 0.9140298 |
| A_51_P2969 | 2696.5  | Detected | 2019.6  | Detected | 3044.6   | Detected | 3303.9  | Detected   | Ppat          | 1.22525496  | 1.12909327 | 1.635918   | 1.5075262 |
| A_52_P1172 | 66.6    | Detected | 46.7    | Detected | 43       | Detected | 81.6    | Detected   | Fryl          | 1.225225225 | 0.64564565 | 1.74732334 | 0.9207709 |
| A_55_P2091 | 4540.7  | Detected | 4116.1  | Detected | 4288.7   | Detected | 5562.7  | Detected   | Cep164        | 1.225075429 | 0.94450195 | 1.35144919 | 1.0419329 |
| A_51_P2093 | 44579.4 | Detected | 49620.8 | Detected | 49768.9  | Detected | 54612.8 | Detected   | Slc35b1       | 1.225068081 | 1.11641027 | 1.10060297 | 1.0029846 |
| A_55_P2227 | 884.2   | Detected | 697.5   | Detected | 517      | Detected | 1083.2  | Detected   | Ptpre         | 1.225062203 | 0.58470934 | 1.55297491 | 0.7412186 |
| A_55_P2015 | 814.5   | Detected | 850.1   | Detected | 993.7    | Detected | 997.8   | Detected   | Aph1a         | 1.225046041 | 1.22001228 | 1.17374427 | 1.1689213 |
| A_51_P2613 | 9020    | Detected | 8831.7  | Detected | 13952.7  | Detected | 11049.6 | Detected   | Mrpl49        | 1.225011086 | 1.54686253 | 1.25112945 | 1.5798431 |
| A_55_P2130 | 128     | Detected | 144.4   | Detected | 130.1    | Detected | 156.8   | Detected   | B830017H08Rik | 1.225       | 1.01640625 | 1.08587258 | 0.9009695 |
| A_55_P2033 | 3563.6  | Detected | 4423.8  | Detected | 4737.1   | Detected | 4364.7  | Detected   | Med6          | 1.224800763 | 1.32930183 | 0.98664044 | 1.0708215 |
| A_51_P3280 | 14120.2 | Detected | 19059.4 | Detected | 16666.2  | Detected | 17290.9 | Detected   | Cops3         | 1.224550644 | 1.18030906 | 0.90721114 | 0.8744347 |

|            |          |          |          |            |          |            |          |            |               |             |            |            |           |
|------------|----------|----------|----------|------------|----------|------------|----------|------------|---------------|-------------|------------|------------|-----------|
| A_55_P1965 | 1107.1   | Detected | 1322.8   | Detected   | 1100.8   | Detected   | 1355.6   | Detected   | Sp2           | 1.224460302 | 0.99430946 | 1.02479589 | 0.8321742 |
| A_66_P1284 | 70.4     | Detected | 67.6     | Detected   | 58.4     | Detected   | 86.2     | Detected   | Fam122b       | 1.224431818 | 0.82954545 | 1.27514793 | 0.8639053 |
| A_55_P2017 | 202.3    | Detected | 198.8    | Detected   | 237.8    | Detected   | 247.7    | Detected   | Ina           | 1.224419179 | 1.17548196 | 1.24597586 | 1.1961771 |
| A_55_P1989 | 342.7    | Detected | 357.3    | Detected   | 344.6    | Detected   | 419.6    | Detected   | Gm3561        | 1.224394514 | 1.00554421 | 1.17436328 | 0.9644556 |
| A_51_P4178 | 1418.2   | Detected | 1812.9   | Detected   | 1944     | Detected   | 1736.4   | Detected   | Smyd5         | 1.224368918 | 1.37075166 | 0.95780242 | 1.0723151 |
| A_51_P4148 | 3554.3   | Detected | 3993.9   | Detected   | 3244.1   | Detected   | 4351.6   | Detected   | Faf1          | 1.224319838 | 0.91272543 | 1.08956158 | 0.8122637 |
| A_55_P2045 | 47.7     | Detected | 54.3     | Detected   | 40.9     | Detected   | 58.4     | Detected   | Gpc5          | 1.224318658 | 0.85744235 | 1.07550645 | 0.7532228 |
| A_55_P1953 | 6290.5   | Detected | 5592.7   | Detected   | 8172.2   | Detected   | 7701.1   | Detected   | Map2k5        | 1.224242906 | 1.29913361 | 1.37699144 | 1.4612262 |
| A_55_P2413 | 1051.1   | Detected | 974.9    | Detected   | 1051.6   | Detected   | 1286.8   | Detected   | Gm10404       | 1.224241271 | 1.00047569 | 1.31993025 | 1.0786747 |
| A_51_P1777 | 154.3    | Detected | 154.9    | Detected   | 172.9    | Detected   | 188.9    | Detected   | Rdh9          | 1.224238496 | 1.12054439 | 1.21949645 | 1.116204  |
| A_55_P2176 | 124      | Detected | 108.9    | Detected   | 151.7    | Detected   | 151.8    | Detected   | Rffl          | 1.224193548 | 1.2233871  | 1.39393939 | 1.3930211 |
| A_52_P4953 | 1039.5   | Detected | 1120     | Detected   | 1235.7   | Detected   | 1272.5   | Detected   | Peo1          | 1.224146224 | 1.18874459 | 1.13616071 | 1.1033036 |
| A_52_P6401 | 23.2     | Detected | 41.6     | Detected   | 25.6     | Detected   | 28.4     | Not Detect | Klhl32        | 1.224137931 | 1.10344828 | 0.68269231 | 0.6153846 |
| A_51_P2954 | 6886.2   | Detected | 5610.5   | Detected   | 7423.7   | Detected   | 8429.6   | Detected   | Zc3h7a        | 1.224129418 | 1.07805466 | 1.50246859 | 1.3231798 |
| A_51_P4912 | 28669.4  | Detected | 30725.9  | Detected   | 39047.5  | Detected   | 35094.4  | Detected   | Sucg1         | 1.224106539 | 1.36199223 | 1.14217647 | 1.2708334 |
| A_55_P2070 | 84.8     | Detected | 79.5     | Detected   | 71       | Detected   | 103.8    | Detected   | Pkd1l3        | 1.224056604 | 0.83726415 | 1.30566038 | 0.8930818 |
| A_55_P1993 | 255.9    | Detected | 224.6    | Detected   | 292.7    | Detected   | 313.2    | Detected   | Mesdc1        | 1.223915592 | 1.14380617 | 1.39447907 | 1.3032057 |
| A_52_P1854 | 11627.8  | Detected | 13292.3  | Detected   | 14604.3  | Detected   | 14231.4  | Detected   | Arpc4         | 1.22391166  | 1.25598136 | 1.07064993 | 1.0987038 |
| A_52_P6350 | 612.3    | Detected | 679.7    | Detected   | 928.6    | Detected   | 749.4    | Detected   | Gpr39         | 1.223909848 | 1.51657684 | 1.10254524 | 1.366191  |
| A_51_P1983 | 3493.6   | Detected | 2450.4   | Detected   | 4096.9   | Detected   | 4275.7   | Detected   | Uckl1         | 1.223866499 | 1.1726872  | 1.74489879 | 1.6719311 |
| A_55_P1965 | 106168.7 | Detected | 136604.1 | Detected   | 131329.9 | Detected   | 129930   | Detected   | Gapdh         | 1.223807017 | 1.23699264 | 0.95114275 | 0.9613906 |
| A_55_P2179 | 9459.8   | Detected | 8954.4   | Detected   | 9870.7   | Detected   | 11576.6  | Detected   | Usp33         | 1.223767944 | 1.04343644 | 1.29283927 | 1.1023296 |
| A_66_P1125 | 5508.4   | Detected | 5972.4   | Detected   | 5511.9   | Detected   | 6740.6   | Detected   | Sec61b        | 1.223694721 | 1.00063539 | 1.12862501 | 0.9228953 |
| A_55_P2034 | 301.1    | Detected | 368.5    | Detected   | 243.6    | Detected   | 368.4    | Detected   | Gm5523        | 1.223513783 | 0.80903354 | 0.99972863 | 0.6610583 |
| A_55_P2016 | 85534.5  | Detected | 69857.8  | Detected   | 94924.2  | Detected   | 104648.6 | Detected   | Eif3c         | 1.223466554 | 1.10977676 | 1.49802313 | 1.3588203 |
| A_55_P2072 | 32.7     | Detected | 38.6     | Detected   | 26.2     | Detected   | 40       | Not Detect | Etv3l         | 1.22324159  | 0.80122324 | 1.03626943 | 0.6787565 |
| A_55_P1989 | 7283.1   | Detected | 7553.6   | Detected   | 8489.8   | Detected   | 8908.4   | Detected   | Tm9sf1        | 1.223160467 | 1.16568494 | 1.17935819 | 1.1239409 |
| A_52_P6201 | 235.8    | Detected | 205.8    | Detected   | 295.6    | Detected   | 288.4    | Detected   | Gm16039       | 1.223070399 | 1.25360475 | 1.40136054 | 1.436346  |
| A_66_P1074 | 39.9     | Detected | 41.9     | Detected   | 26.1     | Detected   | 48.8     | Not Detect | Sfxn5         | 1.223057644 | 0.65413534 | 1.1646778  | 0.6229117 |
| A_55_P1970 | 45525    | Detected | 33150.9  | Detected   | 64052    | Detected   | 55679.1  | Detected   | Agpat2        | 1.223044481 | 1.40696321 | 1.67956526 | 1.9321346 |
| A_55_P2337 | 15.7     | Detected | 15.6     | Detected   | 6        | Not Detect | 19.2     | Not Detect | 4930557J02Rik | 1.222929936 | 0.38216561 | 1.23076923 | 0.3846154 |
| A_55_P2070 | 19.3     | Detected | 15.2     | Not Detect | 17.5     | Not Detect | 23.6     | Not Detect | Vmn2r59       | 1.222797927 | 0.90673575 | 1.55263158 | 1.1513158 |
| A_51_P4608 | 4754.1   | Detected | 4753.7   | Detected   | 5865.9   | Detected   | 5812.9   | Detected   | Rgl2          | 1.222713027 | 1.2338613  | 1.22281591 | 1.2339651 |
| A_55_P2025 | 22.9     | Detected | 27       | Detected   | 21.5     | Detected   | 28       | Not Detect | Syce1l        | 1.222707424 | 0.93886463 | 1.03703704 | 0.7962963 |
| A_51_P4666 | 973.4    | Detected | 1197.7   | Detected   | 742.5    | Detected   | 1190.1   | Detected   | Homer3        | 1.222621738 | 0.76279022 | 0.9936545  | 0.6199382 |
| A_52_P5320 | 2308     | Detected | 2616.1   | Detected   | 2487.1   | Detected   | 2821.7   | Detected   | Hlhf          | 1.222573657 | 1.07759965 | 1.07859027 | 0.95069   |
| A_52_P4421 | 35.5     | Detected | 12.2     | Not Detect | 21.9     | Detected   | 43.4     | Not Detect | Bsn           | 1.222535211 | 0.61690141 | 3.55737705 | 1.795082  |
| A_55_P2156 | 1428.5   | Detected | 1284.7   | Detected   | 1529     | Detected   | 1746.2   | Detected   | Cd3e          | 1.22240112  | 1.07035352 | 1.35922784 | 1.1901611 |
| A_55_P2090 | 3597.4   | Detected | 2845.9   | Detected   | 3279     | Detected   | 4397.4   | Detected   | Stk40         | 1.222382832 | 0.91149163 | 1.54517024 | 1.1521838 |
| A_55_P2037 | 18.9     | Detected | 22.2     | Detected   | 14       | Not Detect | 23.1     | Not Detect | Cyp2d10       | 1.222222222 | 0.74074074 | 1.04054054 | 0.6306306 |

|            |                   |                   |                   |                   |               |                   |            |            |           |
|------------|-------------------|-------------------|-------------------|-------------------|---------------|-------------------|------------|------------|-----------|
| A_55_P1975 | 15.3 Detected     | 18.4 Not Detect   | 28 Detected       | 18.7 Not Detect   | Jhdm1d        | 1.22222222        | 1.83006536 | 1.01630435 | 1.5217391 |
| A_55_P2134 | 6438.8 Detected   | 6487.9 Detected   | 4619.9 Detected   | 7869.1 Detected   | A130077B15Rik | 1.222137665       | 0.71750947 | 1.21288861 | 0.7120794 |
| A_55_P2105 | 6823.4 Detected   | 5041.8 Detected   | 5791.8 Detected   | 8338.6 Detected   | Wdr62         | 1.222059384       | 0.84881437 | 1.65389345 | 1.1487564 |
| A_55_P1959 | 45.5 Detected     | 50.3 Detected     | 36 Detected       | 55.6 Detected     | Chat          | 1.221978022       | 0.79120879 | 1.10536779 | 0.7157058 |
| A_51_P3046 | 5152.1 Detected   | 4736.8 Detected   | 5379.9 Detected   | 6295.5 Detected   | Clpx          | 1.221928922       | 1.04421498 | 1.32906181 | 1.1357668 |
| A_55_P2081 | 279 Detected      | 274.1 Detected    | 183 Detected      | 340.9 Detected    | Gpr26         | 1.221863799       | 0.65591398 | 1.24370668 | 0.6676395 |
| A_55_P1976 | 3637.6 Detected   | 3955.8 Detected   | 4232.9 Detected   | 4444.6 Detected   | Snrnp35       | 1.221849571       | 1.16365186 | 1.1235654  | 1.070049  |
| A_55_P1955 | 30887.8 Detected  | 32582.2 Detected  | 35858.6 Detected  | 37739.6 Detected  |               | 7-Sep 1.221828683 | 1.16093085 | 1.15828888 | 1.100558  |
| A_55_P2090 | 6290.1 Detected   | 6374 Detected     | 6087.6 Detected   | 7685.1 Detected   | Phrf1         | 1.221777078       | 0.96780655 | 1.20569501 | 0.9550675 |
| A_55_P2178 | 74.4 Detected     | 77.6 Detected     | 64 Detected       | 90.9 Detected     | Gprc5d        | 1.221774194       | 0.86021505 | 1.17139175 | 0.8247423 |
| A_55_P2041 | 215.6 Detected    | 153.8 Detected    | 201.8 Detected    | 263.4 Detected    | Cep350        | 1.221706865       | 0.93599258 | 1.71261378 | 1.3120936 |
| A_51_P4075 | 314.9 Detected    | 338.4 Detected    | 248.3 Detected    | 384.7 Detected    | Usp24         | 1.221657669       | 0.78850429 | 1.13682033 | 0.733747  |
| A_55_P2035 | 17227 Detected    | 14015.1 Detected  | 19412.9 Detected  | 21044.4 Detected  | Rab6a         | 1.221594009       | 1.12688802 | 1.5015519  | 1.3851417 |
| A_51_P5099 | 14.9 Not Detect   | 20 Detected       | 32.8 Detected     | 18.2 Not Detect   | Cox6a2        | 1.22147651        | 2.20134228 | 0.91       | 1.64      |
| A_51_P4853 | 3203.1 Detected   | 2377.5 Detected   | 3920.4 Detected   | 3912.4 Detected   | Parn          | 1.221441728       | 1.22393931 | 1.64559411 | 1.648959  |
| A_55_P2020 | 74.1 Detected     | 104.7 Detected    | 111.1 Detected    | 90.5 Detected     | Mapk8         | 1.221322537       | 1.49932524 | 0.8643744  | 1.061127  |
| A_55_P2001 | 72.3 Detected     | 91.9 Detected     | 104.6 Detected    | 88.3 Detected     | Olf297        | 1.221300138       | 1.44674965 | 0.96082699 | 1.1381937 |
| A_52_P2513 | 1317.3 Detected   | 1430.3 Detected   | 972.1 Detected    | 1608.8 Detected   | Neil3         | 1.221285964       | 0.73794883 | 1.12479899 | 0.6796476 |
| A_55_P2125 | 207.9 Detected    | 178.6 Detected    | 164.3 Detected    | 253.9 Detected    | Brd1          | 1.221260221       | 0.79028379 | 1.42161254 | 0.9199328 |
| A_66_P1198 | 2697 Detected     | 2412.9 Detected   | 3048.7 Detected   | 3293.3 Detected   | Wdr91         | 1.221097516       | 1.13040415 | 1.36487215 | 1.2635004 |
| A_55_P2092 | 29.4 Detected     | 15.1 Not Detect   | 34.6 Detected     | 35.9 Not Detect   | Gm7694        | 1.221088435       | 1.17687075 | 2.37748344 | 2.2913907 |
| A_55_P2069 | 627.5 Detected    | 589.2 Detected    | 577.7 Detected    | 766.2 Detected    | Dennd4a       | 1.221035857       | 0.92063745 | 1.30040733 | 0.980482  |
| A_55_P2208 | 1366.3 Detected   | 1431.8 Detected   | 1053.4 Detected   | 1668.3 Detected   | D230019N24Rik | 1.221034912       | 0.77098734 | 1.1651767  | 0.7357173 |
| A_55_P2052 | 206208.2 Detected | 233132.6 Detected | 205450.6 Detected | 251771.5 Detected | Gm12618       | 1.22095775        | 0.99632604 | 1.07994978 | 0.8812607 |
| A_65_P1045 | 1260.7 Detected   | 1638.3 Detected   | 1332.2 Detected   | 1539.1 Detected   | Tmpo          | 1.220829698       | 1.05671452 | 0.93944943 | 0.81316   |
| A_55_P1984 | 60.7 Detected     | 48.9 Detected     | 56.2 Detected     | 74.1 Detected     | Gfra4         | 1.220757825       | 0.92586491 | 1.51533742 | 1.1492843 |
| A_55_P1965 | 4374.4 Detected   | 6492.6 Detected   | 4670.3 Detected   | 5339.8 Detected   | Rwdd1         | 1.220693124       | 1.06764356 | 0.82244401 | 0.7193266 |
| A_55_P2172 | 121 Detected      | 93.4 Detected     | 88.7 Detected     | 147.7 Detected    | Thnsl1        | 1.220661157       | 0.73305785 | 1.58137045 | 0.9496788 |
| A_52_P6493 | 13502.8 Detected  | 16365.2 Detected  | 16786.5 Detected  | 16481.9 Detected  | Sdf4          | 1.220628314       | 1.2431866  | 1.00713099 | 1.0257437 |
| A_51_P5149 | 1525.9 Detected   | 1536.1 Detected   | 2048.2 Detected   | 1862.5 Detected   | Ccar2         | 1.220591127       | 1.3422898  | 1.21248617 | 1.3333767 |
| A_55_P2128 | 725.6 Detected    | 816.4 Detected    | 721.9 Detected    | 885.6 Detected    | Rap1a         | 1.220507166       | 0.99490077 | 1.08476237 | 0.8842479 |
| A_55_P2141 | 142.9 Detected    | 127.4 Detected    | 122.1 Detected    | 174.4 Detected    | Zbtb49        | 1.22043387        | 0.85444367 | 1.3689168  | 0.9583987 |
| A_52_P3541 | 1834.6 Detected   | 1906.1 Detected   | 2625 Detected     | 2238.9 Detected   | Rheb1         | 1.220375014       | 1.43082961 | 1.17459735 | 1.3771575 |
| A_55_P2002 | 54 Detected       | 55.6 Detected     | 31.4 Detected     | 65.9 Detected     | Inpp4a        | 1.22037037        | 0.58148148 | 1.1852518  | 0.5647482 |
| A_55_P2099 | 165.7 Detected    | 163.1 Detected    | 191.9 Detected    | 202.2 Detected    | Gm10461       | 1.22027761        | 1.15811708 | 1.23973023 | 1.1765788 |
| A_51_P3982 | 1490.5 Detected   | 1926.5 Detected   | 1400.2 Detected   | 1818.8 Detected   | Dnajc11       | 1.220261657       | 0.9394163  | 0.94409551 | 0.7268103 |
| A_55_P2424 | 106.3 Detected    | 82 Detected       | 93.9 Detected     | 129.7 Detected    | Nrg3os        | 1.220131703       | 0.88334901 | 1.58170732 | 1.145122  |
| A_55_P2130 | 15.9 Detected     | 27.9 Detected     | 15.6 Not Detect   | 19.4 Not Detect   | Olf1135       | 1.220125786       | 0.98113208 | 0.6953405  | 0.5591398 |
| A_55_P1974 | 1408.1 Detected   | 2274.5 Detected   | 1592.6 Detected   | 1718 Detected     | Eif4e         | 1.220083801       | 1.13102763 | 0.75533084 | 0.7001978 |
| A_51_P3764 | 214.1 Detected    | 181.6 Detected    | 204.4 Detected    | 261.2 Detected    | Tcaim         | 1.219990659       | 0.95469407 | 1.43832599 | 1.1255507 |

|            |         |            |         |            |         |          |         |            |               |             |            |            |           |
|------------|---------|------------|---------|------------|---------|----------|---------|------------|---------------|-------------|------------|------------|-----------|
| A_55_P2173 | 605.6   | Detected   | 594     | Detected   | 645.3   | Detected | 738.8   | Detected   | Crk           | 1.21994716  | 1.06555482 | 1.24377104 | 1.0863636 |
| A_52_P1381 | 487.4   | Detected   | 443.8   | Detected   | 441.9   | Detected | 594.6   | Detected   | 1110032A03Rik | 1.219942552 | 0.90664752 | 1.3397927  | 0.9957188 |
| A_55_P2127 | 124.6   | Detected   | 132.6   | Detected   | 141.8   | Detected | 152     | Detected   | Ccl19         | 1.219903692 | 1.13804173 | 1.14630468 | 1.0693816 |
| A_55_P2057 | 7942.5  | Detected   | 8712.6  | Detected   | 8235.5  | Detected | 9688.7  | Detected   | Ccdc134       | 1.219855209 | 1.03689015 | 1.11203315 | 0.9452402 |
| A_55_P2319 | 130.1   | Detected   | 128.5   | Detected   | 128.7   | Detected | 158.7   | Detected   | AW552889      | 1.219830899 | 0.98923905 | 1.23501946 | 1.0015564 |
| A_55_P2042 | 2763.5  | Detected   | 3133.5  | Detected   | 2166.6  | Detected | 3371    | Detected   | Alkbh4        | 1.219829926 | 0.78400579 | 1.07579384 | 0.6914313 |
| A_55_P1953 | 980.1   | Detected   | 1195.5  | Detected   | 1030.2  | Detected | 1195.5  | Detected   | Lemd3         | 1.219773493 | 1.05111723 | 1          | 0.8617315 |
| A_51_P3685 | 3755.7  | Detected   | 4177.9  | Detected   | 3177.2  | Detected | 4581    | Detected   | Abhd8         | 1.219745986 | 0.84596746 | 1.09648388 | 0.7604778 |
| A_55_P2225 | 127     | Detected   | 112.2   | Detected   | 85.9    | Detected | 154.9   | Detected   | 6330415G19Rik | 1.219685039 | 0.67637795 | 1.38057041 | 0.7655971 |
| A_52_P1838 | 564.7   | Detected   | 1107.5  | Detected   | 432.2   | Detected | 688.7   | Detected   | Dctd          | 1.219585621 | 0.76536214 | 0.62185102 | 0.3902483 |
| A_51_P4412 | 136.2   | Detected   | 185.8   | Detected   | 198.6   | Detected | 166.1   | Detected   | Ttc5          | 1.219530103 | 1.45814978 | 0.89397201 | 1.0688913 |
| A_52_P4844 | 16417.4 | Detected   | 15306   | Detected   | 18329.5 | Detected | 20021.4 | Detected   | Twf1          | 1.219523189 | 1.11646789 | 1.30807526 | 1.1975369 |
| A_55_P2083 | 8.2     | Not Detect | 15.5    | Not Detect | 21.1    | Detected | 10      | Not Detect | Phgr1         | 1.219512195 | 2.57317073 | 0.64516129 | 1.3612903 |
| A_52_P6300 | 1187.2  | Detected   | 1244.6  | Detected   | 1519.7  | Detected | 1447.8  | Detected   | Bet1l         | 1.219508086 | 1.28007075 | 1.16326531 | 1.2210349 |
| A_55_P1963 | 159.5   | Detected   | 178.8   | Detected   | 154.1   | Detected | 194.5   | Detected   | Chchd7        | 1.219435737 | 0.9661442  | 1.08780761 | 0.8618568 |
| A_55_P2021 | 79.3    | Detected   | 79.4    | Detected   | 78.4    | Detected | 96.7    | Detected   | Mum1          | 1.219419924 | 0.98865069 | 1.21788413 | 0.9874055 |
| A_55_P1966 | 6926.2  | Detected   | 7853.3  | Detected   | 6603.3  | Detected | 8445.9  | Detected   | Rnaseh2a      | 1.219413242 | 0.95337992 | 1.07545872 | 0.8408312 |
| A_55_P2122 | 349.8   | Detected   | 248.2   | Detected   | 323.5   | Detected | 426.5   | Detected   | Ppp2r3d       | 1.219268153 | 0.92481418 | 1.71837228 | 1.3033844 |
| A_55_P1975 | 3698.1  | Detected   | 6470.6  | Detected   | 817.4   | Detected | 4508.8  | Detected   | Ifi204        | 1.219220681 | 0.22103242 | 0.69681328 | 0.1263252 |
| A_51_P4193 | 9513.6  | Detected   | 9422.6  | Detected   | 11880.6 | Detected | 11599   | Detected   | Pdcd2l        | 1.219201985 | 1.24880172 | 1.23097659 | 1.2608622 |
| A_55_P1964 | 5857.1  | Detected   | 6102    | Detected   | 6378.8  | Detected | 7140.9  | Detected   | Carm1         | 1.21918697  | 1.08907138 | 1.17025565 | 1.0453622 |
| A_52_P1763 | 2433.7  | Detected   | 2319.9  | Detected   | 2347.8  | Detected | 2966.9  | Detected   | Med1          | 1.219090274 | 0.96470395 | 1.27889133 | 1.0120264 |
| A_55_P2061 | 9002.8  | Detected   | 10098.5 | Detected   | 13006.8 | Detected | 10974.8 | Detected   | Lsm5          | 1.219042964 | 1.44475052 | 1.08677526 | 1.2879933 |
| A_55_P2080 | 119.2   | Detected   | 94.6    | Detected   | 142     | Detected | 145.3   | Detected   | Ttc30a2       | 1.218959732 | 1.19127517 | 1.5359408  | 1.5010571 |
| A_55_P2055 | 319.7   | Detected   | 376.1   | Detected   | 456.2   | Detected | 389.7   | Detected   | Zfp800        | 1.218955271 | 1.42696278 | 1.0361606  | 1.2129753 |
| A_55_P1964 | 34734.8 | Detected   | 40242.9 | Detected   | 35364.6 | Detected | 42339.8 | Detected   | Nme1          | 1.218944689 | 1.01813167 | 1.05210609 | 0.8787786 |
| A_55_P1954 | 1387.7  | Detected   | 1488    | Detected   | 1577.1  | Detected | 1691.5  | Detected   | 2310081J21Rik | 1.218923398 | 1.13648483 | 1.13676075 | 1.059879  |
| A_52_P4891 | 3851.7  | Detected   | 4764.9  | Detected   | 3965.6  | Detected | 4694.9  | Detected   | Nol6          | 1.218916323 | 1.02957136 | 0.98530924 | 0.8322525 |
| A_55_P2147 | 6563.9  | Detected   | 7532.1  | Detected   | 8159.4  | Detected | 8000.6  | Detected   | Abhd17a       | 1.21887902  | 1.24307195 | 1.06220045 | 1.0832835 |
| A_55_P2133 | 1233.6  | Detected   | 856.6   | Detected   | 1093.4  | Detected | 1503.5  | Detected   | Tollip        | 1.218790532 | 0.8863489  | 1.75519496 | 1.2764417 |
| A_55_P2093 | 13620.9 | Detected   | 11399.8 | Detected   | 12054.2 | Detected | 16600.5 | Detected   | Zc3h4         | 1.218752065 | 0.88497823 | 1.45620976 | 1.0574045 |
| A_55_P2235 | 139     | Detected   | 104     | Detected   | 142.4   | Detected | 169.4   | Detected   | Gm9856        | 1.218705036 | 1.02446043 | 1.62884615 | 1.3692308 |
| A_55_P2261 | 606.4   | Detected   | 615     | Detected   | 379.8   | Detected | 739     | Detected   | D230040J21Rik | 1.218667546 | 0.62631926 | 1.20162602 | 0.617561  |
| A_52_P6484 | 30184.7 | Detected   | 24263.9 | Detected   | 30024.2 | Detected | 36782   | Detected   | Nedd4         | 1.218564372 | 0.99468274 | 1.51591459 | 1.2374021 |
| A_51_P3743 | 8652.2  | Detected   | 9625.9  | Detected   | 10265.7 | Detected | 10543.2 | Detected   | Rchy1         | 1.21855713  | 1.18648436 | 1.09529499 | 1.0664665 |
| A_55_P2043 | 171.6   | Detected   | 192.8   | Detected   | 166.5   | Detected | 209.1   | Detected   | Exoc4         | 1.218531469 | 0.97027972 | 1.08454357 | 0.8635892 |
| A_66_P1343 | 15512.6 | Detected   | 16499.8 | Detected   | 13910.8 | Detected | 18901.5 | Detected   | Gm5079        | 1.218461122 | 0.896742   | 1.14555934 | 0.843089  |
| A_55_P1961 | 8461.5  | Detected   | 7374.2  | Detected   | 10051.2 | Detected | 10310   | Detected   | Prka          | 1.218460084 | 1.18787449 | 1.39811776 | 1.3630224 |
| A_52_P1753 | 606.1   | Detected   | 553.6   | Detected   | 816.9   | Detected | 738.4   | Detected   | Yme1l1        | 1.218280812 | 1.34779739 | 1.33381503 | 1.4756142 |
| A_55_P2103 | 3299.5  | Detected   | 2866.2  | Detected   | 2621.6  | Detected | 4019.6  | Detected   | Ppp1r2        | 1.218245189 | 0.79454463 | 1.40241435 | 0.9146605 |

|            |                   |                   |                   |                   |               |             |            |            |           |
|------------|-------------------|-------------------|-------------------|-------------------|---------------|-------------|------------|------------|-----------|
| A_55_P2157 | 47.2 Detected     | 30.9 Detected     | 43.2 Detected     | 57.5 Detected     | Gm13375       | 1.218220339 | 0.91525424 | 1.86084142 | 1.3980583 |
| A_55_P2178 | 6675.7 Detected   | 6268.7 Detected   | 7064.3 Detected   | 8132.3 Detected   | Apoa2         | 1.218194347 | 1.05821112 | 1.29728652 | 1.1269163 |
| A_66_P1400 | 3100.1 Detected   | 4086.1 Detected   | 3729.6 Detected   | 3776.5 Detected   | Wdyhv1        | 1.21818651  | 1.20305797 | 0.92423093 | 0.912753  |
| A_51_P2513 | 8498.8 Detected   | 7847.2 Detected   | 11226 Detected    | 10353.1 Detected  | Slc25a13      | 1.218183744 | 1.32089236 | 1.31933683 | 1.430574  |
| A_55_P2000 | 3400.5 Detected   | 3437.9 Detected   | 4032.6 Detected   | 4142.4 Detected   | Nrf1          | 1.218173798 | 1.18588443 | 1.20492161 | 1.1729835 |
| A_66_P1294 | 2334 Detected     | 1831.5 Detected   | 3080.7 Detected   | 2843.2 Detected   | Pnkp          | 1.218166238 | 1.31992288 | 1.55238875 | 1.6820639 |
| A_51_P4404 | 22253.5 Detected  | 24017.1 Detected  | 33508.2 Detected  | 27108.3 Detected  | Exosc5        | 1.218158941 | 1.50574966 | 1.1287083  | 1.3951809 |
| A_55_P2270 | 6689.7 Detected   | 6649.2 Detected   | 5509.8 Detected   | 8148.9 Detected   | B930036G03Rik | 1.218126373 | 0.82362438 | 1.22554593 | 0.828641  |
| A_55_P2086 | 136.2 Detected    | 139.8 Detected    | 149.5 Detected    | 165.9 Detected    | Wscd2         | 1.218061674 | 1.09765051 | 1.18669528 | 1.0693848 |
| A_55_P2193 | 181.7 Detected    | 177.2 Detected    | 177.3 Detected    | 221.3 Detected    | 4731420N21    | 1.217941662 | 0.97578426 | 1.24887133 | 1.0005643 |
| A_51_P1933 | 10191.6 Detected  | 12199.2 Detected  | 13056.2 Detected  | 12412.7 Detected  | Mrps7         | 1.217934377 | 1.28107461 | 1.01750115 | 1.0702505 |
| A_55_P2213 | 51.4 Detected     | 53.7 Detected     | 33.3 Detected     | 62.6 Detected     | Hnrnpr        | 1.217898833 | 0.64785992 | 1.16573557 | 0.6201117 |
| A_52_P3754 | 8407.2 Detected   | 9604.2 Detected   | 7288.9 Detected   | 10239 Detected    | Tfdp1         | 1.21788467  | 0.86698306 | 1.06609608 | 0.7589284 |
| A_55_P2113 | 28 Detected       | 16.3 Not Detect   | 17.2 Not Detect   | 34.1 Not Detect   | St6gal2       | 1.217857143 | 0.61428571 | 2.09202454 | 1.0552147 |
| A_55_P2014 | 66905.6 Detected  | 62915.6 Detected  | 62355.2 Detected  | 81474.2 Detected  | Naip5         | 1.217748589 | 0.93198776 | 1.29497613 | 0.9910928 |
| A_55_P2135 | 167.2 Detected    | 132.1 Detected    | 184 Detected      | 203.6 Detected    | Dnase1l2      | 1.217703349 | 1.10047847 | 1.54125662 | 1.3928842 |
| A_66_P1392 | 46899.2 Detected  | 45140.8 Detected  | 53309 Detected    | 57109.3 Detected  | Tom70         | 1.217703074 | 1.13667184 | 1.26513708 | 1.1809494 |
| A_55_P1958 | 19.3 Detected     | 9.6 Not Detect    | 14 Not Detect     | 23.5 Not Detect   | Bcl11a        | 1.21761658  | 0.7253886  | 2.44791667 | 1.4583333 |
| A_55_P1977 | 3928.4 Detected   | 3696.8 Detected   | 3289 Detected     | 4783.1 Detected   | Cd244         | 1.217569494 | 0.83723653 | 1.29384873 | 0.8896884 |
| A_51_P2869 | 37.7 Detected     | 34.6 Detected     | 40.8 Detected     | 45.9 Detected     | 1700034O15Rik | 1.217506631 | 1.08222812 | 1.3265896  | 1.1791908 |
| A_55_P1981 | 1162.2 Detected   | 1071.5 Detected   | 1226.4 Detected   | 1414.9 Detected   | Nr2c2         | 1.217432456 | 1.05524006 | 1.3204853  | 1.1445637 |
| A_51_P3105 | 8575.6 Detected   | 8221.1 Detected   | 11134.6 Detected  | 10440 Detected    | Osgep         | 1.217407528 | 1.29840478 | 1.26990305 | 1.354393  |
| A_51_P4487 | 66.7 Detected     | 71.5 Detected     | 54.3 Detected     | 81.2 Detected     | Nrsn1         | 1.217391304 | 0.81409295 | 1.13566434 | 0.7594406 |
| A_55_P2124 | 201529.1 Detected | 262710.6 Detected | 250714.5 Detected | 245326.3 Detected | Gm6981        | 1.217324446 | 1.24406103 | 0.93382718 | 0.9543372 |
| A_55_P1979 | 10991.3 Detected  | 8671.5 Detected   | 16950 Detected    | 13379.6 Detected  | Tef           | 1.217290038 | 1.54212877 | 1.54293951 | 1.9546791 |
| A_55_P2157 | 8036.7 Detected   | 8005.6 Detected   | 10768.2 Detected  | 9782.4 Detected   | Rpusd3        | 1.217216022 | 1.33987831 | 1.22194464 | 1.3450834 |
| A_55_P2011 | 329.7 Detected    | 333.5 Detected    | 296.1 Detected    | 401.3 Detected    | Kif19a        | 1.217167122 | 0.89808917 | 1.20329835 | 0.8878561 |
| A_51_P3846 | 1808.9 Detected   | 1933 Detected     | 2166.8 Detected   | 2201.7 Detected   | Ddx10         | 1.217148543 | 1.19785505 | 1.13900673 | 1.1209519 |
| A_55_P2121 | 705.6 Detected    | 884 Detected      | 857.5 Detected    | 858.8 Detected    | Tdg           | 1.217120181 | 1.21527778 | 0.97149321 | 0.9700226 |
| A_55_P2172 | 14367 Detected    | 11523.1 Detected  | 11667.5 Detected  | 17486.2 Detected  | Ptpn23        | 1.217108652 | 0.81210413 | 1.51749095 | 1.0125314 |
| A_55_P2009 | 2625.3 Detected   | 2722.9 Detected   | 2558.9 Detected   | 3195.1 Detected   | Nrsn2         | 1.217041862 | 0.97470765 | 1.17341805 | 0.9397701 |
| A_51_P2438 | 14439.2 Detected  | 13092.6 Detected  | 15701.3 Detected  | 17572.5 Detected  | Copb2         | 1.216999557 | 1.08740789 | 1.34217039 | 1.19925   |
| A_51_P5125 | 7216.3 Detected   | 8316.5 Detected   | 6020.3 Detected   | 8781.7 Detected   | Zfp68         | 1.216925571 | 0.8342641  | 1.05593699 | 0.7238983 |
| A_51_P2702 | 6112.7 Detected   | 7623.5 Detected   | 6896.1 Detected   | 7437.6 Detected   | Ccdc41        | 1.216745464 | 1.12815941 | 0.97561488 | 0.9045845 |
| A_55_P1996 | 2326.2 Detected   | 2241.8 Detected   | 3315.1 Detected   | 2830.3 Detected   | Kat5          | 1.216705356 | 1.42511392 | 1.26251227 | 1.4787671 |
| A_55_P2102 | 1738.6 Detected   | 999.2 Detected    | 2244.2 Detected   | 2115.3 Detected   | Etl4          | 1.216668584 | 1.2908087  | 2.11699359 | 2.2459968 |
| A_55_P1963 | 78 Detected       | 75.5 Detected     | 63.3 Detected     | 94.9 Detected     | Ppfia4        | 1.216666667 | 0.81153846 | 1.25695364 | 0.8384106 |
| A_51_P3195 | 3430.2 Detected   | 3468.7 Detected   | 2429.7 Detected   | 4173.4 Detected   | Usp42         | 1.216663751 | 0.70832605 | 1.20315969 | 0.7004642 |
| A_55_P2135 | 19.4 Detected     | 12.4 Not Detect   | 4.4 Not Detect    | 23.6 Not Detect   | Cnpy4         | 1.216494845 | 0.22680412 | 1.90322581 | 0.3548387 |
| A_55_P1954 | 2462.3 Detected   | 2976.8 Detected   | 2830 Detected     | 2995.1 Detected   | Ssh2          | 1.216383056 | 1.14933193 | 1.00614754 | 0.9506853 |

|            |          |            |          |            |          |          |          |            |          |             |            |            |           |
|------------|----------|------------|----------|------------|----------|----------|----------|------------|----------|-------------|------------|------------|-----------|
| A_55_P1972 | 30939.3  | Detected   | 21573    | Detected   | 24143.6  | Detected | 37633.8  | Detected   | Klf3     | 1.21637529  | 0.78035379 | 1.74448616 | 1.1191582 |
| A_52_P4338 | 363.3    | Detected   | 354.5    | Detected   | 369.5    | Detected | 441.9    | Detected   | Tctn3    | 1.216350124 | 1.01706579 | 1.24654443 | 1.0423131 |
| A_55_P1992 | 124156.5 | Detected   | 102657.7 | Detected   | 164675.6 | Detected | 151014.4 | Detected   | Edf1     | 1.216322947 | 1.32635504 | 1.47104796 | 1.6041232 |
| A_55_P1968 | 4896.4   | Detected   | 2981.1   | Detected   | 9090.1   | Detected | 5955.6   | Detected   | Smagg    | 1.216322196 | 1.8564864  | 1.99778605 | 3.0492436 |
| A_51_P1321 | 22.2     | Detected   | 49.8     | Detected   | 48.8     | Detected | 27       | Not Detect | Ccdc141  | 1.216216216 | 2.1981982  | 0.54216867 | 0.9799197 |
| A_51_P3902 | 1632.7   | Detected   | 1774     | Detected   | 1522.2   | Detected | 1985.6   | Detected   | Cwc25    | 1.216145036 | 0.9323207  | 1.11927847 | 0.8580609 |
| A_51_P3240 | 9056.5   | Detected   | 8460.5   | Detected   | 8165     | Detected | 11013.8  | Detected   | Med1     | 1.216121018 | 0.90156241 | 1.30179067 | 0.965073  |
| A_55_P2032 | 63006    | Detected   | 79006.1  | Detected   | 58594.1  | Detected | 76619.7  | Detected   | Hmgb1    | 1.216069898 | 0.92997651 | 0.96979474 | 0.7416402 |
| A_55_P2161 | 18308.7  | Detected   | 18911.6  | Detected   | 18216.5  | Detected | 22264.6  | Detected   | Srp68    | 1.216066679 | 0.99496414 | 1.17729859 | 0.9632448 |
| A_52_P2114 | 650.1    | Detected   | 632.9    | Detected   | 547.1    | Detected | 790.4    | Detected   | G2e3     | 1.215812952 | 0.84156284 | 1.24885448 | 0.8644336 |
| A_52_P8000 | 19       | Detected   | 20.4     | Detected   | 21.9     | Detected | 23.1     | Not Detect | Gpr139   | 1.215789474 | 1.15263158 | 1.13235294 | 1.0735294 |
| A_55_P2117 | 10008    | Detected   | 10084.7  | Detected   | 10368    | Detected | 12167.6  | Detected   | Rnf185   | 1.21578737  | 1.03597122 | 1.2065406  | 1.0280921 |
| A_51_P3178 | 346.4    | Detected   | 367.9    | Detected   | 330.4    | Detected | 421.1    | Detected   | Cetn1    | 1.215646651 | 0.95381062 | 1.14460451 | 0.8980701 |
| A_52_P6523 | 2530.8   | Detected   | 2078.7   | Detected   | 3251.3   | Detected | 3076.5   | Detected   | Mapre2   | 1.215623518 | 1.28469259 | 1.48001155 | 1.5641026 |
| A_51_P2211 | 1969.3   | Detected   | 2222     | Detected   | 2203.5   | Detected | 2393.8   | Detected   | L2hgdh   | 1.215558828 | 1.11892551 | 1.07731773 | 0.9916742 |
| A_55_P1979 | 1302.8   | Detected   | 1186.2   | Detected   | 1178.1   | Detected | 1583.6   | Detected   | Zfp648   | 1.215535769 | 0.90428308 | 1.33501939 | 0.9931715 |
| A_55_P2053 | 238580.8 | Detected   | 249698   | Detected   | 266588.3 | Detected | 289998   | Detected   | Gm6548   | 1.215512732 | 1.1173921  | 1.16139497 | 1.0676429 |
| A_55_P2060 | 25386.7  | Detected   | 18346.5  | Detected   | 14033.9  | Detected | 30856    | Detected   | Usp12    | 1.215439581 | 0.55280521 | 1.68184667 | 0.7649361 |
| A_51_P4389 | 1645.2   | Detected   | 1686.3   | Detected   | 1493.9   | Detected | 1999.5   | Detected   | Bag4     | 1.215353756 | 0.9080355  | 1.18573208 | 0.8859041 |
| A_55_P1978 | 16100.3  | Detected   | 14116.3  | Detected   | 17524.7  | Detected | 19566.6  | Detected   | Nr1h2    | 1.215294125 | 1.0884704  | 1.38609976 | 1.2414514 |
| A_55_P2050 | 113.8    | Detected   | 122.2    | Detected   | 88.2     | Detected | 138.3    | Detected   | Cyp4a31  | 1.215289982 | 0.77504394 | 1.13175123 | 0.7217676 |
| A_55_P1989 | 7.9      | Not Detect | 7.2      | Not Detect | 127.6    | Detected | 9.6      | Not Detect | Olfir694 | 1.215189873 | 16.1518987 | 1.33333333 | 17.722222 |
| A_55_P2019 | 191.5    | Detected   | 195.7    | Detected   | 308.3    | Detected | 232.7    | Detected   | Ncoa7    | 1.215143603 | 1.60992167 | 1.1890649  | 1.5753705 |
| A_52_P6999 | 17386.8  | Detected   | 19280.4  | Detected   | 16531.7  | Detected | 21126.6  | Detected   | Kdelr2   | 1.215094209 | 0.95081901 | 1.09575527 | 0.8574355 |
| A_55_P2013 | 236.2    | Detected   | 190      | Detected   | 247.9    | Detected | 287      | Detected   | S100z    | 1.215071973 | 1.04953429 | 1.51052632 | 1.3047368 |
| A_55_P2077 | 1443.4   | Detected   | 1660.2   | Detected   | 1337     | Detected | 1753.8   | Detected   | Hdac1    | 1.215047804 | 0.92628516 | 1.05637875 | 0.8053247 |
| A_55_P2080 | 580.6    | Detected   | 587.1    | Detected   | 480.3    | Detected | 705.4    | Detected   | Tgif2lx1 | 1.214950052 | 0.82724767 | 1.20149889 | 0.8180889 |
| A_55_P2147 | 2331.5   | Detected   | 2251.4   | Detected   | 2517.7   | Detected | 2832.5   | Detected   | Med27    | 1.214883122 | 1.07986275 | 1.25810607 | 1.118282  |
| A_52_P1826 | 93372.9  | Detected   | 103496   | Detected   | 92669.8  | Detected | 113437.1 | Detected   | Cs       | 1.214882477 | 0.99246998 | 1.09605299 | 0.895395  |
| A_55_P2029 | 13339    | Detected   | 15194    | Detected   | 17443.1  | Detected | 16204    | Detected   | Arf4     | 1.214783717 | 1.30767674 | 1.06647361 | 1.1480255 |
| A_52_P6036 | 2467.8   | Detected   | 3009     | Detected   | 2527.4   | Detected | 2997.7   | Detected   | Stx8     | 1.214725667 | 1.02415107 | 0.9962446  | 0.8399468 |
| A_51_P5173 | 35.4     | Detected   | 29       | Detected   | 38.9     | Detected | 43       | Detected   | Wbscr28  | 1.214689266 | 1.09887006 | 1.48275862 | 1.3413793 |
| A_52_P4191 | 3374.4   | Detected   | 4017.9   | Detected   | 4664.4   | Detected | 4098.7   | Detected   | Cyhr1    | 1.214645567 | 1.38229018 | 1.02011001 | 1.160905  |
| A_52_P5520 | 2451.7   | Detected   | 2841     | Detected   | 2625.4   | Detected | 2977.9   | Detected   | Zfyve20  | 1.214626586 | 1.0708488  | 1.04818726 | 0.9241112 |
| A_55_P1994 | 1847.4   | Detected   | 1105.5   | Detected   | 1743.7   | Detected | 2243.9   | Detected   | Its1     | 1.214625961 | 0.94386706 | 2.02976029 | 1.5772953 |
| A_52_P5968 | 4514.2   | Detected   | 5487.1   | Detected   | 8893.1   | Detected | 5482.9   | Detected   | Hrsp12   | 1.214589518 | 1.97002791 | 0.99923457 | 1.6207286 |
| A_55_P1987 | 27.5     | Detected   | 32.4     | Detected   | 25.5     | Detected | 33.4     | Not Detect | Glipr113 | 1.214545455 | 0.92727273 | 1.0308642  | 0.787037  |
| A_55_P1999 | 85.3     | Detected   | 110.2    | Detected   | 91.2     | Detected | 103.6    | Detected   | Aurkc    | 1.214536928 | 1.06916764 | 0.94010889 | 0.8275862 |
| A_66_P1272 | 1128.1   | Detected   | 1154     | Detected   | 1368.3   | Detected | 1370.1   | Detected   | Krt10    | 1.214519989 | 1.21292439 | 1.1872617  | 1.1857019 |
| A_55_P2066 | 14960.3  | Detected   | 13794    | Detected   | 18736.5  | Detected | 18169.2  | Detected   | Akt2     | 1.214494362 | 1.25241472 | 1.31718138 | 1.358308  |

|            |          |            |          |          |          |            |          |            |               |             |            |            |           |
|------------|----------|------------|----------|----------|----------|------------|----------|------------|---------------|-------------|------------|------------|-----------|
| A_52_P1093 | 1063.8   | Detected   | 1176.3   | Detected | 882.5    | Detected   | 1291.9   | Detected   | E2f5          | 1.214420004 | 0.82957323 | 1.09827425 | 0.7502338 |
| A_55_P1994 | 65.3     | Detected   | 66.3     | Detected | 77.3     | Detected   | 79.3     | Detected   | Sema5b        | 1.2143951   | 1.18376723 | 1.19607843 | 1.1659125 |
| A_52_P8435 | 1157.7   | Detected   | 1446.7   | Detected | 1511.7   | Detected   | 1405.9   | Detected   | Homez         | 1.214390602 | 1.3057787  | 0.97179788 | 1.0449298 |
| A_55_P2136 | 165.6    | Detected   | 181.1    | Detected | 145      | Detected   | 201.1    | Detected   | Gm11213       | 1.214371981 | 0.87560386 | 1.11043622 | 0.8006626 |
| A_55_P2047 | 118.5    | Detected   | 139      | Detected | 112.4    | Detected   | 143.9    | Detected   | Unc13a        | 1.214345992 | 0.94852321 | 1.0352518  | 0.8086331 |
| A_55_P1987 | 7        | Not Detect | 15.3     | Detected | 9.6      | Not Detect | 8.5      | Not Detect | 4833424O15Rik | 1.214285714 | 1.37142857 | 0.55555556 | 0.627451  |
| A_55_P2145 | 3451.9   | Detected   | 3614.1   | Detected | 3557     | Detected   | 4191.4   | Detected   | Stk38l        | 1.214229844 | 1.030447   | 1.15973548 | 0.9842008 |
| A_55_P1984 | 221986.5 | Detected   | 276720.4 | Detected | 258538.7 | Detected   | 269532.2 | Detected   | Gapdh         | 1.214182844 | 1.16465956 | 0.9740236  | 0.9342958 |
| A_55_P2440 | 327.3    | Detected   | 301.2    | Detected | 200      | Detected   | 397.4    | Detected   | Usp24         | 1.214176596 | 0.61106019 | 1.31938911 | 0.6640106 |
| A_55_P2168 | 423.5    | Detected   | 380.6    | Detected | 469.7    | Detected   | 514.2    | Detected   | Brox          | 1.214167651 | 1.10909091 | 1.3510247  | 1.234104  |
| A_52_P1390 | 18851.8  | Detected   | 23958.5  | Detected | 28158.3  | Detected   | 22888.1  | Detected   | LOC101055659  | 1.214106876 | 1.49366639 | 0.95532275 | 1.1752948 |
| A_51_P3427 | 586.5    | Detected   | 741.8    | Detected | 705.3    | Detected   | 712      | Detected   | Mlh3          | 1.213981245 | 1.20255754 | 0.95982745 | 0.9507954 |
| A_55_P2037 | 694.2    | Detected   | 669      | Detected | 650.9    | Detected   | 842.7    | Detected   | Jsrp1         | 1.213915298 | 0.93762604 | 1.25964126 | 0.9729447 |
| A_52_P1899 | 5774.6   | Detected   | 5867.4   | Detected | 4967.9   | Detected   | 7009.7   | Detected   | Dbnl          | 1.213884944 | 0.86030201 | 1.19468589 | 0.8466953 |
| A_55_P2090 | 13746.4  | Detected   | 13122    | Detected | 21544.9  | Detected   | 16685.8  | Detected   | Mrpl48        | 1.21383053  | 1.56731217 | 1.2715897  | 1.6418915 |
| A_55_P2061 | 36288.9  | Detected   | 37661.1  | Detected | 48344.2  | Detected   | 44045.4  | Detected   | Ghitm         | 1.213743045 | 1.33220351 | 1.16951974 | 1.283664  |
| A_55_P2374 | 26.7     | Detected   | 21.4     | Detected | 23.9     | Detected   | 32.4     | Not Detect | 9530085L11Rik | 1.213483146 | 0.89513109 | 1.51401869 | 1.1168224 |
| A_55_P2110 | 34153.7  | Detected   | 37463.4  | Detected | 37338.3  | Detected   | 41444.6  | Detected   | Lmo7          | 1.213473211 | 1.09324319 | 1.10626905 | 0.9966607 |
| A_55_P2105 | 192.1    | Detected   | 178.4    | Detected | 138.9    | Detected   | 233.1    | Detected   | Tmed5         | 1.213430505 | 0.72306091 | 1.30661435 | 0.7785874 |
| A_55_P2014 | 41008.3  | Detected   | 44499.2  | Detected | 42214.5  | Detected   | 49759.3  | Detected   | Amd2          | 1.213395825 | 1.02941356 | 1.11820662 | 0.9486575 |
| A_55_P1963 | 18539.3  | Detected   | 19040.2  | Detected | 27053.1  | Detected   | 22495.4  | Detected   | Tsen54        | 1.213389934 | 1.45922985 | 1.18146868 | 1.4208412 |
| A_55_P2170 | 1307     | Detected   | 1423.8   | Detected | 892.4    | Detected   | 1585.9   | Detected   | Rgl1          | 1.213389441 | 0.682785   | 1.11385026 | 0.6267734 |
| A_51_P5133 | 905.9    | Detected   | 765.3    | Detected | 1009.5   | Detected   | 1099.2   | Detected   | Azi2          | 1.21337896  | 1.11436141 | 1.43629949 | 1.3190906 |
| A_55_P1962 | 14180    | Detected   | 10556    | Detected | 13574.3  | Detected   | 17205.5  | Detected   | Als2cl        | 1.213363893 | 0.95728491 | 1.62992611 | 1.2859322 |
| A_55_P1991 | 187.5    | Detected   | 155.6    | Detected | 172.9    | Detected   | 227.5    | Detected   | Lair1         | 1.213333333 | 0.92213333 | 1.46208226 | 1.1111825 |
| A_51_P2251 | 913.6    | Detected   | 866.3    | Detected | 963.8    | Detected   | 1108.5   | Detected   | Smndc1        | 1.213331874 | 1.05494746 | 1.27957982 | 1.1125476 |
| A_52_P5123 | 810.1    | Detected   | 701.4    | Detected | 1107.9   | Detected   | 982.9    | Detected   | Zfp219        | 1.213306999 | 1.36760894 | 1.40134018 | 1.5795552 |
| A_55_P2168 | 465.2    | Detected   | 419.5    | Detected | 504.8    | Detected   | 564.4    | Detected   | Brox          | 1.213241617 | 1.08512468 | 1.3454112  | 1.2033373 |
| A_55_P2029 | 27.2     | Detected   | 34.8     | Detected | 35.2     | Detected   | 33       | Not Detect | Muc4          | 1.213235294 | 1.29411765 | 0.94827586 | 1.0114943 |
| A_66_P1371 | 1797.8   | Detected   | 2089.9   | Detected | 1952.5   | Detected   | 2181     | Detected   | Spryd7        | 1.213149405 | 1.08604962 | 1.0435906  | 0.9342552 |
| A_55_P2150 | 2264.3   | Detected   | 2254.5   | Detected | 2205.4   | Detected   | 2746.8   | Detected   | E030030I06Rik | 1.213090138 | 0.97398755 | 1.21836327 | 0.9782213 |
| A_52_P1276 | 2276.2   | Detected   | 1606.3   | Detected | 2756.9   | Detected   | 2761.2   | Detected   | Dagla         | 1.213074422 | 1.21118531 | 1.71898151 | 1.7163046 |
| A_55_P2042 | 3867.6   | Detected   | 5036.7   | Detected | 4230.5   | Detected   | 4691.4   | Detected   | Zfp639        | 1.21300031  | 1.0938308  | 0.93144321 | 0.8399349 |
| A_51_P1149 | 39182.3  | Detected   | 36604.9  | Detected | 43028.1  | Detected   | 47525.9  | Detected   | Cstb          | 1.212943089 | 1.09815146 | 1.29834804 | 1.1754738 |
| A_52_P2876 | 953.8    | Detected   | 989.6    | Detected | 1193.1   | Detected   | 1156.9   | Detected   | Pik3c3        | 1.212937723 | 1.25089117 | 1.16905821 | 1.2056386 |
| A_51_P1621 | 8269.7   | Detected   | 8492.8   | Detected | 8147.3   | Detected   | 10030.5  | Detected   | Trappc3       | 1.212921871 | 0.98519898 | 1.18105925 | 0.9593185 |
| A_66_P1162 | 233.2    | Detected   | 224.3    | Detected | 252.5    | Detected   | 282.8    | Detected   | Efh2          | 1.212692967 | 1.08276158 | 1.26081141 | 1.1257245 |
| A_55_P2179 | 840.2    | Detected   | 620.6    | Detected | 898.9    | Detected   | 1018.8   | Detected   | Macrod2       | 1.212568436 | 1.06986432 | 1.64163713 | 1.448437  |
| A_55_P2148 | 73.4     | Detected   | 52       | Detected | 68.1     | Detected   | 89       | Detected   | 2810021J22Rik | 1.21253406  | 0.92779292 | 1.71153846 | 1.3096154 |
| A_51_P2095 | 4938.2   | Detected   | 5900.3   | Detected | 4666.9   | Detected   | 5987.6   | Detected   | Bcl10         | 1.212506581 | 0.94506095 | 1.01479586 | 0.7909598 |



|            |         |          |         |          |         |            |         |            |               |             |            |            |           |
|------------|---------|----------|---------|----------|---------|------------|---------|------------|---------------|-------------|------------|------------|-----------|
| A_52_P5393 | 14392.2 | Detected | 11610.8 | Detected | 18181.6 | Detected   | 17450.2 | Detected   | Serp2         | 1.212476202 | 1.2632954  | 1.50292831 | 1.5659214 |
| A_55_P1953 | 417     | Detected | 214.4   | Detected | 266.3   | Detected   | 505.6   | Detected   | Cry2          | 1.212470024 | 0.63860911 | 2.35820896 | 1.2420709 |
| A_55_P1966 | 3614.7  | Detected | 4399.2  | Detected | 3980.4  | Detected   | 4382.7  | Detected   | Arhgdib       | 1.212465765 | 1.10117022 | 0.99624932 | 0.9048009 |
| A_52_P6552 | 1367.4  | Detected | 1792.3  | Detected | 1751.3  | Detected   | 1657.9  | Detected   | Bora          | 1.21244698  | 1.28075179 | 0.92501255 | 0.9771244 |
| A_55_P1958 | 4654.4  | Detected | 3428    | Detected | 4469.9  | Detected   | 5643.1  | Detected   | Nipsnap3b     | 1.212422654 | 0.96036009 | 1.64617853 | 1.3039382 |
| A_55_P2380 | 201.1   | Detected | 190.3   | Detected | 224     | Detected   | 243.8   | Detected   | 5430440L12Rik | 1.212332173 | 1.11387369 | 1.28113505 | 1.1770888 |
| A_55_P1967 | 6038.7  | Detected | 6631.1  | Detected | 8812.5  | Detected   | 7320.9  | Detected   | Lsm5          | 1.212330468 | 1.45933727 | 1.10402497 | 1.328965  |
| A_55_P2100 | 13288.4 | Detected | 19505.3 | Detected | 14932   | Detected   | 16108.5 | Detected   | Ptges3        | 1.21222269  | 1.12368682 | 0.82585246 | 0.7655355 |
| A_55_P1988 | 6464.2  | Detected | 8322.9  | Detected | 9275.3  | Detected   | 7835.9  | Detected   | Gstz1         | 1.212199499 | 1.43487206 | 0.94148674 | 1.1144313 |
| A_51_P3085 | 41      | Detected | 42.9    | Detected | 34.7    | Detected   | 49.7    | Not Detect | Gcm2          | 1.212195122 | 0.84634146 | 1.15850816 | 0.8088578 |
| A_55_P2111 | 167.3   | Detected | 184.8   | Detected | 166.8   | Detected   | 202.8   | Detected   | Higd1b        | 1.212193664 | 0.99701136 | 1.0974026  | 0.9025974 |
| A_55_P2129 | 190.4   | Detected | 167.5   | Detected | 220.7   | Detected   | 230.8   | Detected   | Palb2         | 1.212184874 | 1.15913866 | 1.37791045 | 1.3176119 |
| A_55_P2061 | 721.3   | Detected | 702.6   | Detected | 595.8   | Detected   | 874.3   | Detected   | Pnlcd1        | 1.212117011 | 0.8260086  | 1.24437802 | 0.8479932 |
| A_55_P2100 | 41.5    | Detected | 38.7    | Detected | 46.4    | Detected   | 50.3    | Not Detect | Duox2         | 1.212048193 | 1.11807229 | 1.2997416  | 1.1989664 |
| A_55_P2008 | 2614    | Detected | 2502.5  | Detected | 2829.8  | Detected   | 3168.1  | Detected   | Gm15348       | 1.211973986 | 1.08255547 | 1.26597403 | 1.1307892 |
| A_52_P1685 | 194.5   | Detected | 180.6   | Detected | 190.2   | Detected   | 235.7   | Detected   | Zdhhc21       | 1.211825193 | 0.97789203 | 1.30509413 | 1.0531561 |
| A_55_P2022 | 1344.4  | Detected | 1275.3  | Detected | 1395.1  | Detected   | 1629.1  | Detected   | Mgat5b        | 1.211767331 | 1.03771199 | 1.27742492 | 1.0939387 |
| A_55_P2166 | 454.8   | Detected | 499.2   | Detected | 452.3   | Detected   | 551.1   | Detected   | Atp9a         | 1.211741425 | 0.99450308 | 1.10396635 | 0.9060497 |
| A_55_P2043 | 5042    | Detected | 4514.3  | Detected | 6361.1  | Detected   | 6108.7  | Detected   | Rnf26         | 1.211562872 | 1.26162237 | 1.35318876 | 1.4091    |
| A_55_P1970 | 20.8    | Detected | 17      | Detected | 14      | Not Detect | 25.2    | Not Detect | Zscan10       | 1.211538462 | 0.67307692 | 1.48235294 | 0.8235294 |
| A_51_P3427 | 21653   | Detected | 20538.7 | Detected | 20290.8 | Detected   | 26233   | Detected   | Ppp1cb        | 1.211518034 | 0.93708955 | 1.27724734 | 0.9879301 |
| A_55_P2173 | 1003.9  | Detected | 1421.8  | Detected | 943.9   | Detected   | 1216.2  | Detected   | Gm20939       | 1.211475247 | 0.94023309 | 0.85539457 | 0.6638768 |
| A_55_P2013 | 2945.1  | Detected | 3184.2  | Detected | 3810.4  | Detected   | 3567.9  | Detected   | Arpc4         | 1.211469899 | 1.29381006 | 1.12050122 | 1.1966585 |
| A_55_P2149 | 7202.6  | Detected | 9495.4  | Detected | 7040.5  | Detected   | 8725.7  | Detected   | Srsf11        | 1.211465304 | 0.97749424 | 0.9189397  | 0.7414643 |
| A_55_P2000 | 8617.6  | Detected | 8012.7  | Detected | 6610.1  | Detected   | 10439.9 | Detected   | Slc5a6        | 1.211462588 | 0.76704651 | 1.30291912 | 0.8249529 |
| A_55_P1975 | 16292.8 | Detected | 22795   | Detected | 20877.3 | Detected   | 19737.8 | Detected   | Nup37         | 1.211443091 | 1.28138196 | 0.86588287 | 0.9158719 |
| A_55_P2166 | 5610.1  | Detected | 4385.5  | Detected | 6831.2  | Detected   | 6796.3  | Detected   | Dedd2         | 1.211440081 | 1.217661   | 1.54972067 | 1.5576787 |
| A_66_P1256 | 2887.1  | Detected | 3332.4  | Detected | 2755.7  | Detected   | 3497.5  | Detected   | Wdr63         | 1.211423227 | 0.9544872  | 1.04954387 | 0.8269415 |
| A_55_P2055 | 116.5   | Detected | 94.6    | Detected | 122.6   | Detected   | 141.1   | Detected   | Zscan26       | 1.211158798 | 1.05236052 | 1.49154334 | 1.2959831 |
| A_55_P2034 | 755     | Detected | 1362.6  | Detected | 855.4   | Detected   | 914.4   | Detected   | BC147527      | 1.211125828 | 1.13298013 | 0.67107001 | 0.6277704 |
| A_55_P2015 | 59.7    | Detected | 39.3    | Detected | 102.1   | Detected   | 72.3    | Detected   | Tuba3a        | 1.211055276 | 1.71021776 | 1.83969466 | 2.5979644 |
| A_55_P2443 | 578.6   | Detected | 685.5   | Detected | 602.2   | Detected   | 700.7   | Detected   | Xpo7          | 1.211026616 | 1.04078811 | 1.0221736  | 0.8784829 |
| A_51_P4018 | 8407.3  | Detected | 8580.4  | Detected | 7952.3  | Detected   | 10181.3 | Detected   | 2510003E04Rik | 1.211007101 | 0.94588037 | 1.18657638 | 0.9267983 |
| A_51_P5167 | 5319.8  | Detected | 5546.9  | Detected | 5503.5  | Detected   | 6442.1  | Detected   | Hap1          | 1.210966578 | 1.03453137 | 1.16138744 | 0.9921758 |
| A_55_P2002 | 22209.6 | Detected | 17927.9 | Detected | 30430.3 | Detected   | 26890.8 | Detected   | Hmha1         | 1.210773719 | 1.37014174 | 1.49994143 | 1.6973711 |
| A_55_P2115 | 713.9   | Detected | 798.5   | Detected | 751.3   | Detected   | 864.3   | Detected   | Prpf4         | 1.210673764 | 1.05238829 | 1.08240451 | 0.9408892 |
| A_55_P2045 | 264.9   | Detected | 255.1   | Detected | 343.8   | Detected   | 320.7   | Detected   | Zfp953        | 1.210645527 | 1.29784824 | 1.25715406 | 1.3477068 |
| A_55_P2161 | 5806.8  | Detected | 5981.3  | Detected | 4624.4  | Detected   | 7029.6  | Detected   | Trp63         | 1.210580698 | 0.79637666 | 1.1752629  | 0.773143  |
| A_55_P2420 | 342.5   | Detected | 439.3   | Detected | 321.8   | Detected   | 414.6   | Detected   | 2900016J10Rik | 1.210510949 | 0.93956204 | 0.94377419 | 0.732529  |
| A_52_P1001 | 1403.5  | Detected | 1086.9  | Detected | 1480.9  | Detected   | 1698.7  | Detected   | Tmem64        | 1.210331315 | 1.05514784 | 1.56288527 | 1.3624988 |

|            |          |          |          |            |         |            |          |            |               |             |            |            |           |
|------------|----------|----------|----------|------------|---------|------------|----------|------------|---------------|-------------|------------|------------|-----------|
| A_55_P2198 | 2670.8   | Detected | 2696.7   | Detected   | 3761.9  | Detected   | 3232.5   | Detected   | Tsen54        | 1.210311517 | 1.40852928 | 1.19868728 | 1.3950013 |
| A_55_P2096 | 9743.5   | Detected | 10369.4  | Detected   | 11955.7 | Detected   | 11792.3  | Detected   | Bcs1l         | 1.210273516 | 1.22704367 | 1.13722105 | 1.152979  |
| A_51_P5084 | 5355.5   | Detected | 6731.3   | Detected   | 5198.3  | Detected   | 6481.5   | Detected   | Tmtc4         | 1.210251144 | 0.970647   | 0.96288978 | 0.772258  |
| A_55_P2028 | 14301    | Detected | 17279.1  | Detected   | 18035.3 | Detected   | 17307.8  | Detected   | Stoml2        | 1.210251031 | 1.2611216  | 1.00166097 | 1.0437639 |
| A_55_P2035 | 50.9     | Detected | 49.8     | Detected   | 35.6    | Detected   | 61.6     | Detected   | 3110099E03Rik | 1.21021611  | 0.69941061 | 1.23694779 | 0.7148594 |
| A_55_P2150 | 406.3    | Detected | 677.6    | Detected   | 443     | Detected   | 491.7    | Detected   | Cpne7         | 1.210189515 | 1.09032734 | 0.72564935 | 0.653778  |
| A_55_P2301 | 342.1    | Detected | 282.3    | Detected   | 420.6   | Detected   | 414      | Detected   | C78653        | 1.210172464 | 1.22946507 | 1.46652497 | 1.4899044 |
| A_55_P2088 | 53879.7  | Detected | 58661.2  | Detected   | 60827.1 | Detected   | 65203.4  | Detected   | Hcn2          | 1.210166352 | 1.12894281 | 1.11152516 | 1.0369222 |
| A_55_P1962 | 1832.4   | Detected | 2437.9   | Detected   | 1814.3  | Detected   | 2217.5   | Detected   | Ccnt1         | 1.210161537 | 0.99012224 | 0.90959432 | 0.7442061 |
| A_55_P2058 | 626.3    | Detected | 623.3    | Detected   | 515.9   | Detected   | 757.9    | Detected   | Mast3         | 1.210122944 | 0.82372665 | 1.21594738 | 0.8276913 |
| A_52_P4484 | 944.7    | Detected | 1046.2   | Detected   | 691.6   | Detected   | 1143.2   | Detected   | BC004004      | 1.210119615 | 0.73208426 | 1.0927165  | 0.6610591 |
| A_55_P2091 | 6599.3   | Detected | 5885.9   | Detected   | 11273.4 | Detected   | 7985.5   | Detected   | Gpr137        | 1.210052581 | 1.70827209 | 1.3567169  | 1.9153231 |
| A_55_P2025 | 51410.8  | Detected | 82809.2  | Detected   | 51234.7 | Detected   | 62200.1  | Detected   | Lsm6          | 1.209864464 | 0.99657465 | 0.75112548 | 0.6187078 |
| A_55_P1981 | 23069.7  | Detected | 24633.7  | Detected   | 24969   | Detected   | 27910.7  | Detected   | Ap1b1         | 1.209842347 | 1.08232877 | 1.13302914 | 1.0136114 |
| A_55_P2157 | 24609    | Detected | 31630.5  | Detected   | 35029   | Detected   | 29772.5  | Detected   | Phb2          | 1.20982161  | 1.42342233 | 0.94125923 | 1.1074438 |
| A_52_P8147 | 277.4    | Detected | 331.6    | Detected   | 264.5   | Detected   | 335.6    | Detected   | Ttc26         | 1.209805335 | 0.95349676 | 1.01206273 | 0.7976478 |
| A_52_P6814 | 440.5    | Detected | 355.4    | Detected   | 346.6   | Detected   | 532.9    | Detected   | Stx17         | 1.209761635 | 0.78683314 | 1.49943725 | 0.9752392 |
| A_52_P5957 | 26909.5  | Detected | 26403.1  | Detected   | 37536.6 | Detected   | 32553.5  | Detected   | Tmbim6        | 1.209740055 | 1.39492001 | 1.23294234 | 1.421674  |
| A_52_P1034 | 227.5    | Detected | 269.2    | Detected   | 260.8   | Detected   | 275.2    | Detected   | Elf1          | 1.20967033  | 1.14637363 | 1.02228826 | 0.9687964 |
| A_55_P2408 | 1377.8   | Detected | 1509.1   | Detected   | 1219.1  | Detected   | 1666.3   | Detected   | Arntl         | 1.209391784 | 0.88481637 | 1.10416805 | 0.8078325 |
| A_52_P4766 | 32       | Detected | 23.1     | Detected   | 3.4     | Not Detect | 38.7     | Not Detect | Pogk          | 1.209375    | 0.10625    | 1.67532468 | 0.1471861 |
| A_55_P2011 | 109.9    | Detected | 123.3    | Detected   | 103.6   | Detected   | 132.9    | Detected   | Gm1604A       | 1.209281165 | 0.94267516 | 1.07785888 | 0.8402271 |
| A_52_P1389 | 333.6    | Detected | 201      | Detected   | 250.5   | Detected   | 403.4    | Detected   | Trpm4         | 1.209232614 | 0.75089928 | 2.00696517 | 1.2462687 |
| A_55_P1995 | 2530.7   | Detected | 2166.4   | Detected   | 2586.6  | Detected   | 3060.2   | Detected   | Cnppd1        | 1.209230648 | 1.02208875 | 1.41257386 | 1.1939623 |
| A_55_P2169 | 82.7     | Detected | 80       | Detected   | 94.5    | Detected   | 100      | Detected   | Tenm4         | 1.209189843 | 1.1426844  | 1.25       | 1.18125   |
| A_55_P1962 | 2959.2   | Detected | 3265.5   | Detected   | 2743.7  | Detected   | 3577.5   | Detected   | Ccar1         | 1.208941606 | 0.92717626 | 1.09554433 | 0.8402082 |
| A_55_P1976 | 3632.6   | Detected | 3294.2   | Detected   | 4849.7  | Detected   | 4391.6   | Detected   | Fads3         | 1.208941254 | 1.33504928 | 1.33313096 | 1.4721936 |
| A_55_P2171 | 468.3    | Detected | 339.3    | Detected   | 500.8   | Detected   | 566.1    | Detected   | Sec22c        | 1.208840487 | 1.06939996 | 1.66843501 | 1.47598   |
| A_55_P2250 | 242.5    | Detected | 258.8    | Detected   | 168.5   | Detected   | 293.1    | Detected   | Nbea          | 1.208659794 | 0.69484536 | 1.13253478 | 0.6510819 |
| A_55_P2161 | 16.3     | Detected | 17.6     | Not Detect | 12      | Not Detect | 19.7     | Not Detect | Ptchd2        | 1.208588957 | 0.73619632 | 1.11931818 | 0.6818182 |
| A_51_P1569 | 676      | Detected | 520      | Detected   | 584.7   | Detected   | 817      | Detected   | Arid4a        | 1.208579882 | 0.86494083 | 1.57115385 | 1.1244231 |
| A_55_P2039 | 177500.5 | Detected | 196470.6 | Detected   | 174791  | Detected   | 214508.6 | Detected   | Cla1          | 1.208495751 | 0.98473525 | 1.09181017 | 0.8896547 |
| A_52_P3996 | 1890.4   | Detected | 1845.5   | Detected   | 2894.6  | Detected   | 2284.4   | Detected   | Tprkb         | 1.208421498 | 1.53121033 | 1.23782173 | 1.5684638 |
| A_55_P2168 | 271.1    | Detected | 273      | Detected   | 319.2   | Detected   | 327.6    | Detected   | Khk           | 1.208410181 | 1.1774253  | 1.2        | 1.1692308 |
| A_55_P2428 | 14.4     | Detected | 15.4     | Not Detect | 14.5    | Not Detect | 17.4     | Not Detect | Retn          | 1.208333333 | 1.00694444 | 1.12987013 | 0.9415584 |
| A_55_P2003 | 82.1     | Detected | 111.6    | Detected   | 97.3    | Detected   | 99.2     | Detected   | D830025C05Rik | 1.208282582 | 1.18514007 | 0.88888889 | 0.8718638 |
| A_66_P1199 | 4196.1   | Detected | 3850     | Detected   | 4224.1  | Detected   | 5069.4   | Detected   | Atg7          | 1.208121827 | 1.00667286 | 1.31672727 | 1.0971688 |
| A_55_P1995 | 61408.8  | Detected | 73386    | Detected   | 56256.5 | Detected   | 74184.9  | Detected   | Pomp          | 1.208049986 | 0.91609834 | 1.01088627 | 0.7665835 |
| A_52_P4125 | 1968.3   | Detected | 2264.9   | Detected   | 1911.3  | Detected   | 2377.8   | Detected   | Dcaf15        | 1.208047554 | 0.971041   | 1.04984768 | 0.8438783 |
| A_55_P2055 | 5668.7   | Detected | 6706.5   | Detected   | 6864.9  | Detected   | 6847.7   | Detected   | Sdf4          | 1.207984194 | 1.2110184  | 1.0210542  | 1.0236189 |

|            |          |            |          |          |          |            |          |            |               |             |            |            |           |
|------------|----------|------------|----------|----------|----------|------------|----------|------------|---------------|-------------|------------|------------|-----------|
| A_52_P1088 | 326.1    | Detected   | 110.9    | Detected | 200.5    | Detected   | 393.9    | Detected   | Clip3         | 1.207911684 | 0.61484207 | 3.55184851 | 1.8079351 |
| A_55_P2037 | 324314.8 | Detected   | 400033.8 | Detected | 380930.8 | Detected   | 391737.3 | Detected   | Gapdh         | 1.207892147 | 1.17457113 | 0.9792605  | 0.9522465 |
| A_55_P1986 | 18273.4  | Detected   | 14566.8  | Detected | 17408.4  | Detected   | 22070.1  | Detected   | Enoph1        | 1.207771953 | 0.95266343 | 1.51509597 | 1.1950737 |
| A_52_P2896 | 18862.7  | Detected   | 19509.7  | Detected | 23934.3  | Detected   | 22780.6  | Detected   | Ssbp1         | 1.207706214 | 1.26886925 | 1.16765506 | 1.2267898 |
| A_55_P2083 | 7021.8   | Detected   | 8358.6   | Detected | 6996.8   | Detected   | 8480.1   | Detected   | Mtus2         | 1.207681791 | 0.99643966 | 1.01453593 | 0.837078  |
| A_65_P0877 | 60.2     | Detected   | 15.3     | Detected | 51.4     | Detected   | 72.7     | Detected   | Zfp937        | 1.207641196 | 0.8538206  | 4.75163399 | 3.3594771 |
| A_55_P2102 | 527.9    | Detected   | 522.4    | Detected | 480.1    | Detected   | 637.5    | Detected   | Dzip1         | 1.207615079 | 0.90945255 | 1.22032925 | 0.9190276 |
| A_55_P1953 | 28550.6  | Detected   | 30714.1  | Detected | 32120.1  | Detected   | 34476.9  | Detected   | Yap1          | 1.20757182  | 1.12502364 | 1.12251051 | 1.045777  |
| A_55_P1965 | 21.2     | Detected   | 47.9     | Detected | 8.1      | Not Detect | 25.6     | Not Detect | Xlr3b         | 1.20754717  | 0.38207547 | 0.53444676 | 0.1691023 |
| A_55_P2175 | 19480.4  | Detected   | 24406.6  | Detected | 21461.9  | Detected   | 23519.8  | Detected   | Csde1         | 1.207357138 | 1.10171762 | 0.96366557 | 0.8793482 |
| A_52_P2902 | 112.4    | Detected   | 77.2     | Detected | 91.4     | Detected   | 135.7    | Detected   | Zfp182        | 1.207295374 | 0.81316726 | 1.75777202 | 1.1839378 |
| A_55_P2039 | 35.7     | Detected   | 30.2     | Detected | 43.5     | Detected   | 43.1     | Not Detect | Dio1          | 1.207282913 | 1.21848739 | 1.42715232 | 1.4403974 |
| A_52_P1881 | 2020.1   | Detected   | 2057.2   | Detected | 2055.2   | Detected   | 2438.8   | Detected   | Gosr2         | 1.207266967 | 1.01737538 | 1.18549485 | 0.9990278 |
| A_51_P3692 | 850.2    | Detected   | 962.4    | Detected | 1298.5   | Detected   | 1026.4   | Detected   | 4632434111Rik | 1.207245354 | 1.5272877  | 1.06650042 | 1.3492311 |
| A_51_P1100 | 1873.2   | Detected   | 1677.2   | Detected | 2006.3   | Detected   | 2261.4   | Detected   | Pik3r4        | 1.207238949 | 1.07105488 | 1.34831863 | 1.1962199 |
| A_66_P1245 | 63616.4  | Detected   | 78016.9  | Detected | 82962.5  | Detected   | 76793.8  | Detected   | Rps15         | 1.207138411 | 1.30410555 | 0.98432263 | 1.0633914 |
| A_55_P1997 | 1185.1   | Detected   | 1144.8   | Detected | 935.8    | Detected   | 1430.5   | Detected   | Nlrx1         | 1.207071133 | 0.78963801 | 1.24956324 | 0.8174354 |
| A_55_P1985 | 672.3    | Detected   | 685.6    | Detected | 468.2    | Detected   | 811.5    | Detected   | Pard3         | 1.207050424 | 0.69641529 | 1.18363477 | 0.6829055 |
| A_55_P2089 | 3714.9   | Detected   | 4168.8   | Detected | 4430.4   | Detected   | 4483.7   | Detected   | Eif2d         | 1.206950389 | 1.19260276 | 1.07553732 | 1.0627519 |
| A_55_P2069 | 213.1    | Detected   | 162      | Detected | 184.9    | Detected   | 257.2    | Detected   | 1110017D15Rik | 1.206945096 | 0.86766776 | 1.58765432 | 1.141358  |
| A_55_P2174 | 214.1    | Detected   | 252.5    | Detected | 177.8    | Detected   | 258.4    | Detected   | Stam2         | 1.206912658 | 0.83045306 | 1.02336634 | 0.7041584 |
| A_51_P1227 | 45308.3  | Detected   | 41847.3  | Detected | 47679.8  | Detected   | 54683    | Detected   | Grpel1        | 1.206909109 | 1.0523414  | 1.30672708 | 1.1393758 |
| A_55_P2394 | 8.7      | Not Detect | 20.7     | Detected | 17.4     | Not Detect | 10.5     | Not Detect | 9330198N18Rik | 1.206896552 | 2          | 0.50724638 | 0.8405797 |
| A_51_P3119 | 616.4    | Detected   | 629.6    | Detected | 708.2    | Detected   | 743.9    | Detected   | Elp6          | 1.206846204 | 1.14892927 | 1.18154384 | 1.1248412 |
| A_55_P2098 | 1062.8   | Detected   | 1015     | Detected | 932.2    | Detected   | 1282.6   | Detected   | Cfhr2         | 1.206812194 | 0.87711705 | 1.26364532 | 0.9184236 |
| A_52_P3153 | 1472.5   | Detected   | 1605     | Detected | 1773.9   | Detected   | 1777     | Detected   | Cyb5r1        | 1.206791171 | 1.20468591 | 1.10716511 | 1.1052336 |
| A_55_P1994 | 48141.3  | Detected   | 62050.5  | Detected | 50746    | Detected   | 58095.9  | Detected   | Hmgb2         | 1.206778795 | 1.05410531 | 0.93626804 | 0.8178177 |
| A_55_P2014 | 3949.5   | Detected   | 3907.3   | Detected | 4621.6   | Detected   | 4766     | Detected   | Ercc2         | 1.20673503  | 1.17017344 | 1.21976813 | 1.1828117 |
| A_55_P2042 | 1309.5   | Detected   | 1301.9   | Detected | 996.2    | Detected   | 1580.2   | Detected   | Trim37        | 1.206720122 | 0.76074838 | 1.2137645  | 0.7651893 |
| A_55_P2016 | 8574.1   | Detected   | 10993.5  | Detected | 9088.9   | Detected   | 10346    | Detected   | Ddx39b        | 1.206657258 | 1.06004129 | 0.94110156 | 0.8267522 |
| A_55_P2074 | 684.9    | Detected   | 657.5    | Detected | 662.3    | Detected   | 826.4    | Detected   | Zbtb24        | 1.206599504 | 0.96700248 | 1.25688213 | 1.0073004 |
| A_52_P2514 | 350      | Detected   | 304.6    | Detected | 444.1    | Detected   | 422.3    | Detected   | Trappc8       | 1.206571429 | 1.26885714 | 1.3864084  | 1.4579777 |
| A_55_P2016 | 1570.7   | Detected   | 1357     | Detected | 1812.5   | Detected   | 1895.1   | Detected   | Aaed1         | 1.206532119 | 1.1539441  | 1.39653648 | 1.3356669 |
| A_55_P2037 | 2030.7   | Detected   | 1688.2   | Detected | 1870.3   | Detected   | 2450     | Detected   | Pdxdc1        | 1.206480524 | 0.92101246 | 1.45124985 | 1.1078664 |
| A_52_P6058 | 33362.8  | Detected   | 26176.5  | Detected | 31568.8  | Detected   | 40250.8  | Detected   | Pthr1         | 1.206457492 | 0.94622753 | 1.53766928 | 1.2059977 |
| A_55_P2368 | 6309.3   | Detected   | 6628.1   | Detected | 3523.3   | Detected   | 7611.8   | Detected   | 2610319H10Rik | 1.206441285 | 0.55842962 | 1.14841357 | 0.5315701 |
| A_55_P2016 | 9286.3   | Detected   | 13685.7  | Detected | 8272.9   | Detected   | 11202.9  | Detected   | Ppid          | 1.206390058 | 0.8908715  | 0.81858436 | 0.6044923 |
| A_51_P2339 | 24396.8  | Detected   | 16972.2  | Detected | 23351.5  | Detected   | 29431    | Detected   | Tbc1d10b      | 1.206346734 | 0.95715422 | 1.73407101 | 1.3758676 |
| A_52_P4309 | 2113.1   | Detected   | 2096.2   | Detected | 2212.7   | Detected   | 2549.1   | Detected   | Dcun1d1       | 1.206331929 | 1.04713454 | 1.21605763 | 1.0555768 |
| A_51_P3294 | 13468.3  | Detected   | 18425.2  | Detected | 17009.2  | Detected   | 16246.2  | Detected   | Bsg           | 1.206254687 | 1.26290623 | 0.88173805 | 0.9231487 |

|            |          |          |          |          |          |            |          |            |               |             |            |            |           |
|------------|----------|----------|----------|----------|----------|------------|----------|------------|---------------|-------------|------------|------------|-----------|
| A_55_P1954 | 342.8    | Detected | 243.8    | Detected | 273      | Detected   | 413.5    | Detected   | Ptdss1        | 1.206242707 | 0.79638273 | 1.69606235 | 1.1197703 |
| A_51_P5111 | 6050.3   | Detected | 6588.2   | Detected | 8318.6   | Detected   | 7298.1   | Detected   | Triap1        | 1.206237707 | 1.37490703 | 1.10775326 | 1.2626514 |
| A_51_P4048 | 15561    | Detected | 15462.1  | Detected | 20461.5  | Detected   | 18770    | Detected   | Ccdc58        | 1.20622068  | 1.31492192 | 1.21393601 | 1.3233325 |
| A_52_P3856 | 1812.2   | Detected | 4167.4   | Detected | 1504.7   | Detected   | 2185.7   | Detected   | Rnpc3         | 1.206103079 | 0.83031674 | 0.52447569 | 0.3610645 |
| A_51_P4276 | 17948.9  | Detected | 8720     | Detected | 18770.1  | Detected   | 21648    | Detected   | Cpt1a         | 1.206090624 | 1.04575211 | 2.48256881 | 2.1525344 |
| A_55_P2074 | 16.5     | Detected | 15.8     | Detected | 10.1     | Not Detect | 19.9     | Not Detect | Sym           | 1.206060606 | 0.61212121 | 1.25949367 | 0.6392405 |
| A_51_P3142 | 24133.3  | Detected | 29895.6  | Detected | 29871.3  | Detected   | 29105.8  | Detected   | Ssr2          | 1.206043102 | 1.23776276 | 0.9735814  | 0.9991872 |
| A_55_P1988 | 160494.5 | Detected | 171499   | Detected | 174210.4 | Detected   | 193554.2 | Detected   | Gng5          | 1.205986498 | 1.08546025 | 1.1286025  | 1.01581   |
| A_52_P4078 | 3398     | Detected | 4029.3   | Detected | 2887.8   | Detected   | 4097.9   | Detected   | Dda1          | 1.205974102 | 0.84985285 | 1.01702529 | 0.7167002 |
| A_55_P2100 | 1733.7   | Detected | 1720.1   | Detected | 1251.9   | Detected   | 2090.7   | Detected   | Usp48         | 1.205917979 | 0.72209725 | 1.21545259 | 0.7278065 |
| A_51_P2956 | 82211.4  | Detected | 108336.3 | Detected | 105250.4 | Detected   | 99132.3  | Detected   | Cyc1          | 1.20582182  | 1.28024094 | 0.91504233 | 0.9715155 |
| A_55_P2153 | 125.4    | Detected | 81.7     | Detected | 99       | Detected   | 151.2    | Detected   | Ski           | 1.205741627 | 0.78947368 | 1.85067319 | 1.2117503 |
| A_55_P2142 | 3436.1   | Detected | 3907.7   | Detected | 3473.2   | Detected   | 4142.9   | Detected   | Mark3         | 1.205698321 | 1.01079712 | 1.06018886 | 0.8888093 |
| A_51_P4387 | 4024.4   | Detected | 4924.3   | Detected | 4537.2   | Detected   | 4852.2   | Detected   | Atpaf2        | 1.205695259 | 1.12742272 | 0.98535833 | 0.9213898 |
| A_55_P1979 | 98.7     | Detected | 116.1    | Detected | 88.3     | Detected   | 119      | Detected   | Srp54b        | 1.205673759 | 0.89463019 | 1.02497847 | 0.7605512 |
| A_55_P2058 | 487.8    | Detected | 354.7    | Detected | 495.9    | Detected   | 588.1    | Detected   | 4833420G17Rik | 1.205617056 | 1.01660517 | 1.65802086 | 1.3980829 |
| A_55_P2097 | 304.5    | Detected | 288.8    | Detected | 306.1    | Detected   | 367.1    | Detected   | Frem2         | 1.205582923 | 1.00525452 | 1.27112188 | 1.059903  |
| A_55_P1960 | 36.5     | Detected | 39.9     | Detected | 28.9     | Detected   | 44       | Not Detect | Fer116        | 1.205479452 | 0.79178082 | 1.10275689 | 0.7243108 |
| A_66_P1290 | 29387.3  | Detected | 25702.5  | Detected | 34860.5  | Detected   | 35419.8  | Detected   | Taf10         | 1.205275748 | 1.18624372 | 1.37806828 | 1.3563078 |
| A_55_P2108 | 2377.7   | Detected | 2021     | Detected | 2352.3   | Detected   | 2865.5   | Detected   | Hps5          | 1.205156243 | 0.98931741 | 1.41786244 | 1.1639287 |
| A_66_P1101 | 3418.9   | Detected | 3044.7   | Detected | 3037.5   | Detected   | 4120.3   | Detected   | Myo18b        | 1.205153704 | 0.88844365 | 1.35326962 | 0.9976352 |
| A_55_P2085 | 128.7    | Detected | 128      | Detected | 117.8    | Detected   | 155.1    | Detected   | 2010007E15Rik | 1.205128205 | 0.91530692 | 1.21171875 | 0.9203125 |
| A_55_P2160 | 160.4    | Detected | 204.1    | Detected | 122      | Detected   | 193.3    | Detected   | Ntpcr         | 1.205112219 | 0.7605985  | 0.94708476 | 0.5977462 |
| A_51_P4368 | 8105.3   | Detected | 7586.6   | Detected | 9219.4   | Detected   | 9767.7   | Detected   | Sertad1       | 1.205100366 | 1.13745327 | 1.28749374 | 1.2152216 |
| A_55_P2124 | 458.4    | Detected | 414      | Detected | 496.3    | Detected   | 552.4    | Detected   | Zfp444        | 1.205061082 | 1.08267888 | 1.33429952 | 1.1987923 |
| A_51_P2024 | 8334.5   | Detected | 8820     | Detected | 10676.8  | Detected   | 10043.3  | Detected   | Sar1a         | 1.205027296 | 1.28103665 | 1.13869615 | 1.2105215 |
| A_55_P2040 | 141      | Detected | 166.3    | Detected | 167.7    | Detected   | 169.9    | Detected   | Pabpc5        | 1.204964539 | 1.1893617  | 1.02164762 | 1.0084185 |
| A_55_P1976 | 19913.3  | Detected | 24173.1  | Detected | 21260.8  | Detected   | 23993.7  | Detected   | Ect2          | 1.204908277 | 1.06766834 | 0.99257853 | 0.8795231 |
| A_51_P4122 | 452.9    | Detected | 522      | Detected | 202      | Detected   | 545.7    | Detected   | Tbc1d16       | 1.204901744 | 0.44601457 | 1.0454023  | 0.3869732 |
| A_55_P2179 | 114.7    | Detected | 121.8    | Detected | 141.3    | Detected   | 138.2    | Detected   | Slc18a3       | 1.204882302 | 1.23190933 | 1.13464696 | 1.1600985 |
| A_55_P2368 | 65.9     | Detected | 77.5     | Detected | 76.3     | Detected   | 79.4     | Detected   | 2010320M18Rik | 1.204855842 | 1.15781487 | 1.02451613 | 0.9845161 |
| A_55_P2186 | 67.4     | Detected | 53.6     | Detected | 67.7     | Detected   | 81.2     | Detected   | Chrna9        | 1.204747774 | 1.00445104 | 1.51492537 | 1.2630597 |
| A_55_P2118 | 68.9     | Detected | 57.5     | Detected | 60.4     | Detected   | 83       | Detected   | St6galnac1    | 1.204644412 | 0.8766328  | 1.44347826 | 1.0504348 |
| A_55_P2000 | 6848     | Detected | 4317     | Detected | 7611.9   | Detected   | 8248.4   | Detected   | E2f8          | 1.204497664 | 1.11155082 | 1.91067871 | 1.7632384 |
| A_55_P2008 | 17378.4  | Detected | 20054.1  | Detected | 18466.5  | Detected   | 20932.1  | Detected   | Qdpr          | 1.204489481 | 1.06261221 | 1.04378157 | 0.9208341 |
| A_51_P5063 | 45.5     | Detected | 43       | Detected | 37.7     | Detected   | 54.8     | Detected   | Hrg           | 1.204395604 | 0.82857143 | 1.2744186  | 0.8767442 |
| A_55_P2173 | 36227.6  | Detected | 34325.2  | Detected | 33213.9  | Detected   | 43631.5  | Detected   | Samd1         | 1.204371805 | 0.91681204 | 1.27112151 | 0.9676244 |
| A_55_P2120 | 1613.8   | Detected | 1871.3   | Detected | 1693.9   | Detected   | 1943.6   | Detected   | Snx11         | 1.204362375 | 1.0496344  | 1.03863624 | 0.9051996 |
| A_55_P2057 | 169067.2 | Detected | 188333   | Detected | 216941.4 | Detected   | 203604.5 | Detected   | Gm4963        | 1.204281493 | 1.28316669 | 1.08108775 | 1.1519033 |
| A_55_P1994 | 40407.6  | Detected | 52721.9  | Detected | 41318.3  | Detected   | 48661.8  | Detected   | Gar1          | 1.204273454 | 1.02253784 | 0.92299026 | 0.7837028 |

|            |          |          |          |            |          |            |          |            |             |             |            |            |           |
|------------|----------|----------|----------|------------|----------|------------|----------|------------|-------------|-------------|------------|------------|-----------|
| A_51_P5188 | 784      | Detected | 741.9    | Detected   | 724.8    | Detected   | 944.1    | Detected   | Ccin        | 1.204209184 | 0.9244898  | 1.27254347 | 0.9769511 |
| A_65_P0454 | 97.5     | Detected | 95       | Detected   | 93.3     | Detected   | 117.4    | Detected   | Zfp207      | 1.204102564 | 0.95692308 | 1.23578947 | 0.9821053 |
| A_52_P5204 | 24840.2  | Detected | 32332.4  | Detected   | 31463.2  | Detected   | 29908.6  | Detected   | Serp1       | 1.204040225 | 1.26662426 | 0.92503495 | 0.9731167 |
| A_55_P1965 | 64419.4  | Detected | 56122.7  | Detected   | 75979.6  | Detected   | 77561.4  | Detected   | Ndufb4      | 1.204006867 | 1.17945215 | 1.38199695 | 1.3538123 |
| A_55_P2078 | 60.3     | Detected | 71.6     | Detected   | 36.3     | Detected   | 72.6     | Detected   | Morc4       | 1.2039801   | 0.60199005 | 1.01396648 | 0.5069832 |
| A_51_P5137 | 7626.1   | Detected | 8371.1   | Detected   | 7006.4   | Detected   | 9181.5   | Detected   | Ctcf        | 1.203957462 | 0.91873959 | 1.09680926 | 0.8369748 |
| A_55_P1965 | 6225.5   | Detected | 6969.8   | Detected   | 6329     | Detected   | 7495.2   | Detected   | Orc3        | 1.20395149  | 1.01662517 | 1.07538236 | 0.9080605 |
| A_55_P2028 | 26       | Detected | 12.6     | Not Detect | 25.3     | Detected   | 31.3     | Not Detect | Gm21944     | 1.203846154 | 0.97307692 | 2.48412698 | 2.0079365 |
| A_55_P2023 | 78854.1  | Detected | 79002.6  | Detected   | 57292.9  | Detected   | 94927.1  | Detected   | Arpc1b      | 1.203832141 | 0.72656843 | 1.20156932 | 0.7252027 |
| A_55_P2366 | 546.2    | Detected | 450.1    | Detected   | 510.9    | Detected   | 657.5    | Detected   | Amn1        | 1.203771512 | 0.93537166 | 1.46078649 | 1.1350811 |
| A_51_P1572 | 6713.4   | Detected | 7608.7   | Detected   | 7791.9   | Detected   | 8081.3   | Detected   | Hiat1       | 1.203756666 | 1.16064885 | 1.06211311 | 1.0240777 |
| A_55_P2073 | 149.7    | Detected | 147.8    | Detected   | 153.7    | Detected   | 180.2    | Detected   | Gm438       | 1.203740815 | 1.02672011 | 1.21921516 | 1.0399188 |
| A_55_P2076 | 210.1    | Detected | 231      | Detected   | 201.3    | Detected   | 252.9    | Detected   | Zfp850      | 1.203712518 | 0.95811518 | 1.09480519 | 0.8714286 |
| A_51_P3203 | 1365.2   | Detected | 1622     | Detected   | 906.2    | Detected   | 1643.2   | Detected   | Plod1       | 1.203633167 | 0.66378553 | 1.01307028 | 0.558693  |
| A_66_P1061 | 146185.8 | Detected | 170102.3 | Detected   | 150900.4 | Detected   | 175953.1 | Detected   | Eef2        | 1.203626481 | 1.03225074 | 1.03439577 | 0.8871156 |
| A_55_P2046 | 16.7     | Detected | 16.4     | Not Detect | 37.7     | Detected   | 20.1     | Not Detect | Dio1        | 1.203592814 | 2.25748503 | 1.22560976 | 2.2987805 |
| A_66_P1096 | 3021.9   | Detected | 2436.1   | Detected   | 3116.5   | Detected   | 3637.1   | Detected   | Sh2b3       | 1.203580529 | 1.03130481 | 1.49300111 | 1.2792989 |
| A_66_P1063 | 7431.3   | Detected | 8576.7   | Detected   | 7495.7   | Detected   | 8943.8   | Detected   | Itgb1bp1    | 1.203531011 | 1.00866605 | 1.04280201 | 0.8739608 |
| A_52_P3720 | 96.8     | Detected | 106.7    | Detected   | 59.8     | Detected   | 116.5    | Detected   | Zfp9        | 1.203512397 | 0.6177686  | 1.0918463  | 0.5604499 |
| A_65_P1018 | 10560.2  | Detected | 12177.4  | Detected   | 10785.9  | Detected   | 12709.1  | Detected   | Rad23b      | 1.203490464 | 1.0213727  | 1.04366285 | 0.8857309 |
| A_55_P2138 | 326.8    | Detected | 256.6    | Detected   | 351.8    | Detected   | 393.3    | Detected   | Gm1698      | 1.203488372 | 1.07649939 | 1.53273578 | 1.3710055 |
| A_52_P6743 | 14678.2  | Detected | 13715.5  | Detected   | 15013.6  | Detected   | 17664.9  | Detected   | Mocs2       | 1.203478628 | 1.02285021 | 1.28795159 | 1.0946447 |
| A_51_P4017 | 3408.1   | Detected | 3390.5   | Detected   | 4134.7   | Detected   | 4101.4   | Detected   | Vwa9        | 1.203427129 | 1.21319797 | 1.20967409 | 1.2194956 |
| A_55_P1960 | 53286.4  | Detected | 61113.6  | Detected   | 63902.9  | Detected   | 64125    | Detected   | Txn2        | 1.203402744 | 1.1992347  | 1.04927545 | 1.0456412 |
| A_52_P2690 | 8780.3   | Detected | 8354.5   | Detected   | 8682.6   | Detected   | 10565.7  | Detected   | Nek9        | 1.203341571 | 0.98887282 | 1.26467173 | 1.0392722 |
| A_55_P2035 | 8871     | Detected | 9320.1   | Detected   | 9224.8   | Detected   | 10674.8  | Detected   | Hsf1        | 1.203336715 | 1.03988276 | 1.14535252 | 0.9897748 |
| A_51_P1549 | 13327.1  | Detected | 10946.3  | Detected   | 15897    | Detected   | 16035.9  | Detected   | Stard3      | 1.203255022 | 1.19283265 | 1.46496076 | 1.4522715 |
| A_55_P2102 | 6931.1   | Detected | 5237.4   | Detected   | 6256.3   | Detected   | 8339.7   | Detected   | Lztr1       | 1.203228925 | 0.90264172 | 1.59233589 | 1.1945431 |
| A_51_P3537 | 1950.8   | Detected | 1547     | Detected   | 2023.6   | Detected   | 2347     | Detected   | G6pd2       | 1.203096166 | 1.03731802 | 1.51712993 | 1.3080802 |
| A_55_P2016 | 1816.2   | Detected | 1705.4   | Detected   | 1239.8   | Detected   | 2184.9   | Detected   | Msl1        | 1.203006277 | 0.68263407 | 1.28116571 | 0.7269849 |
| A_55_P2048 | 27.1     | Detected | 33.2     | Detected   | 32.5     | Detected   | 32.6     | Not Detect | Spock1      | 1.20295203  | 1.19926199 | 0.98192771 | 0.9789157 |
| A_55_P1989 | 103      | Detected | 141.7    | Detected   | 73.9     | Detected   | 123.9    | Detected   | Purg        | 1.202912621 | 0.71747573 | 0.8743825  | 0.5215243 |
| A_55_P2061 | 186.3    | Detected | 237.3    | Detected   | 203      | Detected   | 224.1    | Detected   | Rnpc3       | 1.202898551 | 1.08964037 | 0.94437421 | 0.8554572 |
| A_55_P1953 | 7639.7   | Detected | 7252.6   | Detected   | 7393.3   | Detected   | 9189.4   | Detected   | Nsmaf       | 1.202848279 | 0.96774742 | 1.26704906 | 1.0193999 |
| A_55_P2061 | 28.1     | Detected | 19.4     | Detected   | 12.3     | Not Detect | 33.8     | Not Detect | Wfikkn2     | 1.202846975 | 0.43772242 | 1.74226804 | 0.6340206 |
| A_55_P2293 | 1266.9   | Detected | 1015.7   | Detected   | 1235.9   | Detected   | 1523.8   | Detected   | Slc2a4rg-ps | 1.202778436 | 0.97553082 | 1.50024614 | 1.2167963 |
| A_55_P2110 | 13349.6  | Detected | 13709    | Detected   | 16090.2  | Detected   | 16055.5  | Detected   | Rnf7        | 1.202695212 | 1.20529454 | 1.17116493 | 1.1736961 |
| A_55_P1980 | 83.9     | Detected | 76.1     | Detected   | 75.1     | Detected   | 100.9    | Detected   | Pcmt1       | 1.202622169 | 0.89511323 | 1.32588699 | 0.9868594 |
| A_52_P4293 | 261.6    | Detected | 894.8    | Detected   | 79.7     | Detected   | 314.6    | Detected   | Ccdc69      | 1.202599388 | 0.30466361 | 0.35158695 | 0.0890702 |
| A_55_P2001 | 31.1     | Detected | 27.6     | Detected   | 26.1     | Detected   | 37.4     | Not Detect | Mpz         | 1.202572347 | 0.8392283  | 1.35507246 | 0.9456522 |

|            |         |          |         |            |         |            |         |            |               |             |             |            |            |           |
|------------|---------|----------|---------|------------|---------|------------|---------|------------|---------------|-------------|-------------|------------|------------|-----------|
| A_55_P2096 | 4310.3  | Detected | 3929.8  | Detected   | 4169.2  | Detected   | 5183.4  | Detected   | Kdm1b         | 1.202561307 | 0.96726446  | 1.31899842 | 1.0609191  |           |
| A_55_P2365 | 15.8    | Detected | 11.8    | Not Detect | 9.4     | Not Detect | 19      | Not Detect | Frs3os        | 1.202531646 | 0.59493671  | 1.61016949 | 0.7966102  |           |
| A_55_P1981 | 23.7    | Detected | 25.1    | Detected   | 21.1    | Detected   | 28.5    | Not Detect | Vmn2r88       | 1.202531646 | 0.89029536  | 1.13545817 | 0.8406375  |           |
| A_51_P4968 | 21410.7 | Detected | 19672.4 | Detected   | 23786.7 | Detected   | 25745.3 | Detected   | Capza2        | 1.202450177 | 1.11097255  | 1.30870153 | 1.2091407  |           |
| A_66_P1247 | 572.4   | Detected | 591.4   | Detected   | 486.1   | Detected   | 688.2   | Detected   | LOC101056428  | 1.20230608  | 0.84923131  | 1.1636794  | 0.8219479  |           |
| A_55_P1972 | 8555.1  | Detected | 7109.1  | Detected   | 10741.9 | Detected   | 10284.4 | Detected   | Gjb4          | 1.202136737 | 1.25561361  | 1.44665288 | 1.511007   |           |
| A_55_P1999 | 26426.7 | Detected | 23064   | Detected   | 27532.6 | Detected   | 31768.3 | Detected   | Nudt4         | 1.202128908 | 1.04184783  | 1.37739768 | 1.1937478  |           |
| A_55_P2056 | 113.8   | Detected | 142.5   | Detected   | 80.9    | Detected   | 136.8   | Detected   | Cmtm2a        | 1.202108963 | 0.71089631  | 0.96       | 0.5677193  |           |
| A_55_P2144 | 211.3   | Detected | 186.9   | Detected   | 183.9   | Detected   | 254     | Detected   | Pcdh11x       | 1.202082347 | 0.87032655  | 1.35901552 | 0.9839486  |           |
| A_55_P2145 | 427.7   | Detected | 490     | Detected   | 291.6   | Detected   | 514.1   | Detected   | Gbp5          | 1.202010755 | 0.6817863   | 1.04918367 | 0.595102   |           |
| A_51_P1028 | 90.6    | Detected | 83.6    | Detected   | 105.5   | Detected   | 108.9   | Detected   | Muc5ac        | 1.201986755 | 1.16445916  | 1.30263158 | 1.2619617  |           |
| A_55_P2045 | 899.7   | Detected | 750.7   | Detected   | 840.4   | Detected   | 1081.4  | Detected   | Hipk4         | 1.201956208 | 0.93408914  | 1.44052218 | 1.1194885  |           |
| A_52_P6550 | 3336.5  | Detected | 2574.8  | Detected   | 4488.5  | Detected   | 4010.1  | Detected   | Tbc1d17       | 1.201888206 | 1.34527199  | 1.55744135 | 1.7432422  |           |
| A_55_P2180 | 63.9    | Detected | 65.3    | Detected   | 84.3    | Detected   | 76.8    | Detected   | Lrrc28        | 1.201877934 | 1.31924883  | 1.17611026 | 1.2909648  |           |
| A_55_P2074 | 5183.7  | Detected | 5413.9  | Detected   | 4777.4  | Detected   | 6230    | Detected   | Cdkn2c        | 1.201844243 | 0.92161969  | 1.15074161 | 0.8824323  |           |
| A_52_P4281 | 4791.1  | Detected | 4687.9  | Detected   | 4784.3  | Detected   | 5758.1  | Detected   | Atr           | 1.201832565 | 0.9985807   | 1.22828985 | 1.0205636  |           |
| A_52_P5182 | 49.1    | Detected | 52      | Detected   | 57.2    | Detected   | 59      | Detected   | Helz          | 1.201629328 | 1.16496945  | 1.13461538 | 1.1        |           |
| A_55_P2051 | 3546.2  | Detected | 3261.6  | Detected   | 4159.8  | Detected   | 4261    | Detected   | Gfm2          | 1.201567875 | 1.17303029  | 1.30641403 | 1.2753863  |           |
| A_51_P1156 | 6377    | Detected | 5748.8  | Detected   | 6229.3  | Detected   | 7662.2  | Detected   | Iqcd          | 1.201536773 | 0.97683864  | 1.33283468 | 1.0835827  |           |
| A_52_P6344 | 4084.4  | Detected | 3495.8  | Detected   | 4127.9  | Detected   | 4907.4  | Detected   | Hs1bp3        | 1.201498384 | 1.01065028  | 1.40379884 | 1.180817   |           |
| A_52_P1411 | 4509.1  | Detected | 4621.1  | Detected   | 5468.1  | Detected   | 5417.5  | Detected   | Hnrnpf        | 1.201459271 | 1.21268102  | 1.17233992 | 1.1832897  |           |
| A_55_P2079 | 221.9   | Detected | 235.8   | Detected   | 225.1   | Detected   | 266.6   | Detected   | Fam124b       | 1.201442091 | 1.01442091  | 1.13061917 | 0.9546226  |           |
| A_55_P2094 | 27.8    | Detected | 30.1    | Detected   | 23.7    | Detected   | 33.4    | Not Detect | Gm14135       | 1.201438849 | 0.85251799  | 1.10963455 | 0.7873754  |           |
| A_55_P2111 | 57962.4 | Detected | 61910.7 | Detected   | 76549.4 | Detected   | 69637.9 | Detected   |               | 15-Sep      | 1.201432308 | 1.3206734  | 1.12481203 | 1.2364486 |
| A_55_P1970 | 140.5   | Detected | 198     | Detected   | 117.7   | Detected   | 168.8   | Detected   | Sh3yl1        | 1.201423488 | 0.83772242  | 0.85252525 | 0.5944444  |           |
| A_52_P3013 | 7924.4  | Detected | 8931.3  | Detected   | 8925.6  | Detected   | 9520.2  | Detected   | Aaas          | 1.201378022 | 1.12634395  | 1.06593665 | 0.9993618  |           |
| A_55_P1971 | 2122.6  | Detected | 2235.5  | Detected   | 1617.6  | Detected   | 2550    | Detected   | Kif16b        | 1.201356827 | 0.76208424  | 1.14068441 | 0.7235965  |           |
| A_55_P2288 | 1246.6  | Detected | 1499    | Detected   | 880.2   | Detected   | 1497.6  | Detected   | Ppp2ca        | 1.201347666 | 0.70608054  | 0.99906604 | 0.5871915  |           |
| A_55_P2087 | 184.8   | Detected | 169.4   | Detected   | 165.8   | Detected   | 222     | Detected   | Gm9963        | 1.201298701 | 0.89718615  | 1.31050767 | 0.9787485  |           |
| A_55_P2223 | 95.4    | Detected | 56      | Detected   | 144.9   | Detected   | 114.6   | Detected   | 2700054A10Rik | 1.201257862 | 1.51886792  | 2.04642857 | 2.5875     |           |
| A_51_P2175 | 61205.3 | Detected | 54520.2 | Detected   | 86757.6 | Detected   | 73521   | Detected   | Actr3         | 1.201219502 | 1.41748509  | 1.34850936 | 1.5912928  |           |
| A_55_P1960 | 35106.1 | Detected | 37762.7 | Detected   | 35876.7 | Detected   | 42168.4 | Detected   | Tenm4         | 1.201170167 | 1.0219506   | 1.11666803 | 0.9500565  |           |
| A_66_P1343 | 17.9    | Detected | 26      | Detected   | 14.9    | Not Detect | 21.5    | Not Detect | Pde6c         | 1.201117318 | 0.83240223  | 0.82692308 | 0.5730769  |           |
| A_55_P2115 | 2650.6  | Detected | 2702    | Detected   | 2143    | Detected   | 3183.6  | Detected   | Sms           | 1.201086546 | 0.80849619  | 1.17823834 | 0.7931162  |           |
| A_55_P2105 | 6739    | Detected | 6991.9  | Detected   | 8209.4  | Detected   | 8093.7  | Detected   | Hscb          | 1.201023891 | 1.21819261  | 1.15758235 | 1.1741301  |           |
| A_55_P2124 | 72491.6 | Detected | 62637.5 | Detected   | 84179.2 | Detected   | 87053.5 | Detected   | Capns1        | 1.200877067 | 1.16122696  | 1.38979844 | 1.3439106  |           |
| A_55_P1979 | 49848.1 | Detected | 54920.3 | Detected   | 43641.7 | Detected   | 59859.7 | Detected   | Rab1          | 1.200842158 | 0.87549375  | 1.0899376  | 0.794637   |           |
| A_51_P2846 | 24.4    | Detected | 24.3    | Detected   | 20.3    | Detected   | 29.3    | Not Detect | Cd74          | 1.200819672 | 0.83196721  | 1.20576132 | 0.8353909  |           |
| A_52_P2888 | 28131.8 | Detected | 26474.9 | Detected   | 23720.3 | Detected   | 33777   | Detected   | Chmp4b        | 1.200669705 | 0.84318458  | 1.27581218 | 0.8959543  |           |
| A_55_P1996 | 45661.8 | Detected | 47712.8 | Detected   | 44220.3 | Detected   | 54823.5 | Detected   | Polr2j        | 1.20064255  | 0.96843094  | 1.14903129 | 0.9268016  |           |

|            |          |            |          |            |          |            |          |            |               |             |            |            |           |
|------------|----------|------------|----------|------------|----------|------------|----------|------------|---------------|-------------|------------|------------|-----------|
| A_51_P3650 | 1055.8   | Detected   | 1017.4   | Detected   | 1199.3   | Detected   | 1267.6   | Detected   | Tns1          | 1.200606175 | 1.13591589 | 1.24592098 | 1.1787891 |
| A_55_P2235 | 156.6    | Detected   | 142.2    | Detected   | 100.2    | Detected   | 188      | Detected   | Fam222b       | 1.200510856 | 0.63984674 | 1.32208158 | 0.7046414 |
| A_51_P2211 | 2848.8   | Detected   | 2768.9   | Detected   | 3539.7   | Detected   | 3419.9   | Detected   | Vwa8          | 1.200470373 | 1.24252317 | 1.23511142 | 1.2783777 |
| A_52_P5885 | 13880.7  | Detected   | 17675.3  | Detected   | 14514.1  | Detected   | 16662.6  | Detected   | Ube2d3        | 1.200414965 | 1.0456317  | 0.94270536 | 0.8211516 |
| A_55_P2124 | 450.6    | Detected   | 448.2    | Detected   | 462.5    | Detected   | 540.9    | Detected   | Brdt          | 1.200399467 | 1.02640923 | 1.20682731 | 1.0319054 |
| A_51_P2204 | 30198.3  | Detected   | 24659.7  | Detected   | 31924.4  | Detected   | 36250    | Detected   | Rnpepl1       | 1.200398698 | 1.05715885 | 1.47000977 | 1.2945981 |
| A_55_P1953 | 255.5    | Detected   | 235.5    | Detected   | 264.9    | Detected   | 306.7    | Detected   | Dcdc2b        | 1.200391389 | 1.03679061 | 1.30233546 | 1.1248408 |
| A_52_P5528 | 39712.3  | Detected   | 43509    | Detected   | 54564.1  | Detected   | 47670.3  | Detected   | Ndufa4        | 1.200391315 | 1.37398489 | 1.09564228 | 1.2540877 |
| A_55_P1977 | 13576.9  | Detected   | 11770.4  | Detected   | 12814.5  | Detected   | 16297.2  | Detected   | Epb4.1        | 1.20036238  | 0.9438458  | 1.38459186 | 1.0887056 |
| A_55_P2106 | 247.1    | Detected   | 186.6    | Detected   | 347.1    | Detected   | 296.6    | Detected   | Zfp114        | 1.200323756 | 1.40469446 | 1.58949625 | 1.8601286 |
| A_51_P1512 | 4632.2   | Detected   | 5269.5   | Detected   | 4891.4   | Detected   | 5559.9   | Detected   | Eif4b         | 1.200272009 | 1.05595613 | 1.05510959 | 0.9282475 |
| A_51_P2348 | 10943.8  | Detected   | 8474.3   | Detected   | 9784.5   | Detected   | 13132.8  | Detected   | Strn4         | 1.20002193  | 0.89406787 | 1.54972092 | 1.1546086 |
| A_52_P6411 | 14       | Detected   | 9.6      | Not Detect | 25.6     | Detected   | 16.8     | Not Detect | Sox14         | 1.2         | 1.82857143 | 1.75       | 2.6666667 |
| A_55_P1957 | 12       | Not Detect | 17.7     | Detected   | 3.5      | Not Detect | 14.4     | Not Detect | Gm2927        | 1.2         | 0.29166667 | 0.81355932 | 0.1977401 |
| A_55_P1960 | 265568.1 | Detected   | 299315.8 | Detected   | 255011.9 | Detected   | 318669.2 | Detected   | Gm20764       | 1.199952856 | 0.9602505  | 1.0646588  | 0.8519828 |
| A_51_P1368 | 389.2    | Detected   | 195.7    | Detected   | 204.7    | Detected   | 467      | Detected   | Tanc1         | 1.199897225 | 0.52595067 | 2.38630557 | 1.0459888 |
| A_55_P2056 | 1325.4   | Detected   | 1340     | Detected   | 1411.3   | Detected   | 1590.3   | Detected   | Stk11ip       | 1.199864192 | 1.06481062 | 1.18679104 | 1.053209  |
| A_55_P2277 | 1994.1   | Detected   | 2131.4   | Detected   | 1691.6   | Detected   | 2392.6   | Detected   | E430010N07Rik | 1.199839527 | 0.84830249 | 1.12254856 | 0.7936568 |
| A_52_P2174 | 347.8    | Detected   | 407.2    | Detected   | 457.5    | Detected   | 417.3    | Detected   | Htra3         | 1.199827487 | 1.31541116 | 1.02480354 | 1.1235265 |
| A_55_P2140 | 24228    | Detected   | 24664.4  | Detected   | 29441.2  | Detected   | 29069.1  | Detected   | Tufm          | 1.199814264 | 1.21517253 | 1.17858533 | 1.1936719 |
| A_51_P3522 | 27422    | Detected   | 25747.3  | Detected   | 31759.6  | Detected   | 32900.9  | Detected   | Sirt7         | 1.199799431 | 1.15817956 | 1.27783884 | 1.2335119 |
| A_55_P2162 | 1141.4   | Detected   | 1035.2   | Detected   | 1174.4   | Detected   | 1369.4   | Detected   | Ing4          | 1.199754687 | 1.02891186 | 1.32283617 | 1.1344668 |
| A_51_P3848 | 285077.1 | Detected   | 322446.9 | Detected   | 279094.3 | Detected   | 342008.1 | Detected   | Mdh2          | 1.19970387  | 0.9790134  | 1.06066487 | 0.8655512 |
| A_55_P2072 | 268.9    | Detected   | 308.7    | Detected   | 180.3    | Detected   | 322.6    | Detected   | Zfp142        | 1.199702492 | 0.67050948 | 1.04502753 | 0.5840622 |
| A_51_P5126 | 2283.1   | Detected   | 5695.8   | Detected   | 1749.7   | Detected   | 2739     | Detected   | Ttll5         | 1.199684639 | 0.76637029 | 0.48088065 | 0.3071913 |
| A_55_P1996 | 5818.7   | Detected   | 7828.4   | Detected   | 5505.5   | Detected   | 6979.6   | Detected   | Prmt10        | 1.199511918 | 0.94617354 | 0.89157427 | 0.7032727 |
| A_55_P1973 | 11623    | Detected   | 15433.7  | Detected   | 15736    | Detected   | 13941    | Detected   | Htra2         | 1.19943216  | 1.35386733 | 0.90328308 | 1.019587  |
| A_55_P1993 | 149987.9 | Detected   | 155432.6 | Detected   | 117678.4 | Detected   | 179897.8 | Detected   | Ap1s1         | 1.19941542  | 0.78458596 | 1.1574007  | 0.7571024 |
| A_55_P2043 | 18479.7  | Detected   | 18727.6  | Detected   | 13578.8  | Detected   | 22164.3  | Detected   | Luzp1         | 1.199386354 | 0.73479548 | 1.1835099  | 0.7250689 |
| A_55_P2152 | 9261.3   | Detected   | 8036.4   | Detected   | 9766.1   | Detected   | 11106.1  | Detected   | Zwilch        | 1.199194498 | 1.05450639 | 1.38197452 | 1.2152332 |
| A_55_P2042 | 11610.4  | Detected   | 10223.3  | Detected   | 16774.4  | Detected   | 13921.9  | Detected   | Fech          | 1.199088748 | 1.44477365 | 1.36178142 | 1.6408009 |
| A_51_P4862 | 2395.1   | Detected   | 1110     | Detected   | 2332.5   | Detected   | 2871.9   | Detected   | Wnk4          | 1.199073108 | 0.9738633  | 2.5872973  | 2.1013514 |
| A_55_P2074 | 20.1     | Detected   | 15.4     | Not Detect | 8.9      | Not Detect | 24.1     | Not Detect | Psg28         | 1.199004975 | 0.44278607 | 1.56493506 | 0.5779221 |
| A_51_P3439 | 296.5    | Detected   | 192.8    | Detected   | 276.1    | Detected   | 355.5    | Detected   | Prrg4         | 1.198988196 | 0.9311973  | 1.84387967 | 1.4320539 |
| A_55_P2010 | 400.1    | Detected   | 433.7    | Detected   | 416.4    | Detected   | 479.7    | Detected   | Ewsr1         | 1.198950262 | 1.04073982 | 1.1060641  | 0.9601107 |
| A_55_P2039 | 464.7    | Detected   | 435.8    | Detected   | 135.8    | Detected   | 557.1    | Detected   | Pax8          | 1.19883796  | 0.29223155 | 1.27833869 | 0.3116108 |
| A_51_P3438 | 563.3    | Detected   | 430.4    | Detected   | 524.6    | Detected   | 675.3    | Detected   | Tgfbra1       | 1.198828333 | 0.93129771 | 1.56900558 | 1.2188662 |
| A_55_P1998 | 24317.3  | Detected   | 22981.9  | Detected   | 27202.3  | Detected   | 29148.4  | Detected   | Oas1b         | 1.19866926  | 1.11863982 | 1.26831985 | 1.1836402 |
| A_55_P1987 | 3763.1   | Detected   | 4396.6   | Detected   | 4192.5   | Detected   | 4510.6   | Detected   | Gabrr2        | 1.19863942  | 1.11410805 | 1.02592913 | 0.9535778 |
| A_55_P2012 | 58.4     | Detected   | 69.3     | Detected   | 44.3     | Detected   | 70       | Detected   | LOC101056086  | 1.198630137 | 0.75856164 | 1.01010101 | 0.6392496 |

|            |                  |                  |                  |                  |               |             |            |            |           |
|------------|------------------|------------------|------------------|------------------|---------------|-------------|------------|------------|-----------|
| A_51_P4365 | 43.3 Detected    | 43.6 Detected    | 39.1 Detected    | 51.9 Detected    | Tmc2          | 1.198614319 | 0.90300231 | 1.19036697 | 0.896789  |
| A_52_P1454 | 699.9 Detected   | 720.3 Detected   | 565.6 Detected   | 838.9 Detected   | Rictor        | 1.1985998   | 0.80811545 | 1.16465362 | 0.7852284 |
| A_55_P2085 | 3583.3 Detected  | 3427.2 Detected  | 4483.9 Detected  | 4294.9 Detected  | Lmbr11        | 1.198587894 | 1.25133257 | 1.25318044 | 1.3083275 |
| A_55_P1967 | 13050.2 Detected | 8188.4 Detected  | 12170.4 Detected | 15640.5 Detected | Adam10        | 1.19848738  | 0.93258341 | 1.91008011 | 1.4862977 |
| A_55_P2031 | 461.1 Detected   | 449 Detected     | 342.7 Detected   | 552.6 Detected   | Rufy3         | 1.198438517 | 0.74322273 | 1.23073497 | 0.7632517 |
| A_51_P2766 | 24.2 Detected    | 13.2 Not Detect  | 14.7 Not Detect  | 29 Not Detect    | Vmn2r58       | 1.198347107 | 0.60743802 | 2.1969697  | 1.1136364 |
| A_55_P2254 | 642 Detected     | 605.1 Detected   | 723.4 Detected   | 769.3 Detected   | AU020094      | 1.198286604 | 1.12679128 | 1.27136011 | 1.1955049 |
| A_51_P4394 | 7989.6 Detected  | 7349.4 Detected  | 6858.8 Detected  | 9573.3 Detected  | Insig2        | 1.198220186 | 0.85846601 | 1.30259613 | 0.9332463 |
| A_55_P2071 | 311.8 Detected   | 179.5 Detected   | 300.1 Detected   | 373.6 Detected   | Tmc4          | 1.198203977 | 0.96247595 | 2.08133705 | 1.6718663 |
| A_51_P3498 | 7726.7 Detected  | 9418.5 Detected  | 9615.1 Detected  | 9258.1 Detected  | Med11         | 1.198195866 | 1.24439929 | 0.98296969 | 1.0208738 |
| A_55_P2081 | 855.4 Detected   | 897.7 Detected   | 830.8 Detected   | 1024.9 Detected  | Slc28a1       | 1.198152911 | 0.97124152 | 1.14169544 | 0.9254762 |
| A_52_P5757 | 15602.7 Detected | 16634.4 Detected | 18049.8 Detected | 18694.2 Detected | Mtfr1         | 1.198138784 | 1.15683824 | 1.12382773 | 1.0850887 |
| A_51_P3289 | 16757.7 Detected | 12888.8 Detected | 13802.9 Detected | 20077.9 Detected | Tmem165       | 1.198129815 | 0.82367509 | 1.55777885 | 1.070922  |
| A_51_P3902 | 20.7 Detected    | 25.3 Detected    | 16.8 Not Detect  | 24.8 Not Detect  | Larp6         | 1.198067633 | 0.8115942  | 0.98023715 | 0.6640316 |
| A_55_P2042 | 1984.4 Detected  | 1765.9 Detected  | 1799.3 Detected  | 2377.4 Detected  | Sgk2          | 1.198044749 | 0.90672243 | 1.34628235 | 1.0189139 |
| A_55_P2069 | 12270.5 Detected | 13510.9 Detected | 11604.3 Detected | 14700.6 Detected | Sqstm1        | 1.198044089 | 0.94570718 | 1.08805483 | 0.8588843 |
| A_52_P6541 | 1408.3 Detected  | 1474 Detected    | 1300.3 Detected  | 1687.2 Detected  | Dync1li2      | 1.19804019  | 0.92331179 | 1.14464043 | 0.8821574 |
| A_52_P1093 | 502.1 Detected   | 763.7 Detected   | 11.3 Not Detect  | 601.5 Detected   | Pik3r5        | 1.197968532 | 0.02250548 | 0.78761294 | 0.0147964 |
| A_51_P1487 | 225 Detected     | 241.3 Detected   | 221.4 Detected   | 269.5 Detected   | Msantd1       | 1.197777778 | 0.984      | 1.11686697 | 0.91753   |
| A_52_P6210 | 1836 Detected    | 1660.8 Detected  | 1334.2 Detected  | 2199 Detected    | Nmt1          | 1.197712418 | 0.72668845 | 1.32406069 | 0.8033478 |
| A_51_P1430 | 196.5 Detected   | 145.4 Detected   | 179.3 Detected   | 235.3 Detected   | Rab11fip2     | 1.197455471 | 0.91246819 | 1.61829436 | 1.2331499 |
| A_55_P2061 | 1638.6 Detected  | 1786.4 Detected  | 1688.4 Detected  | 1962 Detected    | ND6           | 1.197363603 | 1.0303918  | 1.09829825 | 0.9451411 |
| A_51_P1254 | 243.3 Detected   | 394.7 Detected   | 280.7 Detected   | 291.3 Detected   | Dph1          | 1.1972873   | 1.15371969 | 0.73802888 | 0.711173  |
| A_55_P2152 | 11540.9 Detected | 12869.4 Detected | 13255.3 Detected | 13817.6 Detected | Map2k2        | 1.19727231  | 1.14854994 | 1.07367865 | 1.0299859 |
| A_51_P2734 | 22731.9 Detected | 13626.6 Detected | 13520.8 Detected | 27214 Detected   | Prkg2         | 1.197172256 | 0.5947941  | 1.99712327 | 0.9922358 |
| A_55_P2038 | 1457.7 Detected  | 1248.7 Detected  | 1060.9 Detected  | 1744.9 Detected  | Tmem104       | 1.197022707 | 0.72779035 | 1.39737327 | 0.8496036 |
| A_55_P2093 | 64 Detected      | 65.6 Detected    | 52.2 Detected    | 76.6 Detected    | Zscan25       | 1.196875    | 0.815625   | 1.16768293 | 0.7957317 |
| A_55_P2129 | 63 Detected      | 80.5 Detected    | 76.9 Detected    | 75.4 Detected    | Nrp           | 1.196825397 | 1.22063492 | 0.93664596 | 0.9552795 |
| A_52_P3676 | 811.7 Detected   | 842.4 Detected   | 812 Detected     | 971.4 Detected   | Acin1         | 1.196747567 | 1.00036959 | 1.1531339  | 0.9639126 |
| A_55_P2077 | 4119.6 Detected  | 3326.4 Detected  | 3826 Detected    | 4929.7 Detected  | Nktr          | 1.196645305 | 0.92873094 | 1.48199254 | 1.1501924 |
| A_55_P1979 | 125.7 Detected   | 122.6 Detected   | 127.9 Detected   | 150.4 Detected   | Etnk2         | 1.196499602 | 1.01750199 | 1.22675367 | 1.04323   |
| A_55_P1955 | 29275.7 Detected | 27498.7 Detected | 27452.3 Detected | 35028 Detected   | Rabac1        | 1.196487189 | 0.93771626 | 1.27380567 | 0.9983126 |
| A_55_P2169 | 1766.2 Detected  | 1394.5 Detected  | 1404.9 Detected  | 2113.2 Detected  | Rufy3         | 1.196466991 | 0.79543653 | 1.51538186 | 1.0074579 |
| A_55_P1991 | 154.8 Detected   | 82.7 Detected    | 145.9 Detected   | 185.2 Detected   | Nos1ap        | 1.196382429 | 0.94250646 | 2.23941959 | 1.764208  |
| A_55_P2015 | 265.3 Detected   | 264.3 Detected   | 430.1 Detected   | 317.4 Detected   | Bcas1         | 1.196381455 | 1.62118357 | 1.20090806 | 1.6273174 |
| A_51_P3058 | 11576.8 Detected | 12277.4 Detected | 13361.3 Detected | 13849.4 Detected | Chordc1       | 1.196306406 | 1.1541445  | 1.12804014 | 1.0882842 |
| A_55_P2226 | 757 Detected     | 447.4 Detected   | 467.8 Detected   | 905.6 Detected   | 5033418A18Rik | 1.196301189 | 0.61796565 | 2.02413947 | 1.0455968 |
| A_55_P2002 | 5421.2 Detected  | 3619.2 Detected  | 5988.7 Detected  | 6484.8 Detected  | Ap5s1         | 1.196192725 | 1.10468162 | 1.79177719 | 1.6547027 |
| A_65_P1770 | 15498.6 Detected | 16938 Detected   | 15444 Detected   | 18537.7 Detected | Apobec3       | 1.196088679 | 0.9964771  | 1.09444444 | 0.911796  |
| A_51_P1980 | 22829.2 Detected | 19341.9 Detected | 29830.9 Detected | 27305.7 Detected | Mien1         | 1.196086591 | 1.30669931 | 1.41173825 | 1.5422942 |



|            |                  |                  |                  |                  |               |             |            |            |           |
|------------|------------------|------------------|------------------|------------------|---------------|-------------|------------|------------|-----------|
| A_52_P6189 | 15.3 Detected    | 9.3 Not Detect   | 7.9 Not Detect   | 18.3 Not Detect  | Lcn9          | 1.196078431 | 0.51633987 | 1.96774194 | 0.8494624 |
| A_55_P2008 | 14403.9 Detected | 14205.8 Detected | 16970.9 Detected | 17227.8 Detected | Rxrb          | 1.19605107  | 1.17821562 | 1.21273001 | 1.1946458 |
| A_51_P5139 | 2757.2 Detected  | 2931.9 Detected  | 3241 Detected    | 3297.5 Detected  | Rsl24d1       | 1.195959669 | 1.17546787 | 1.1246973  | 1.1054265 |
| A_55_P2031 | 144.6 Detected   | 145.3 Detected   | 136.4 Detected   | 172.9 Detected   | Ccdc6         | 1.19571231  | 0.94329184 | 1.18995182 | 0.9387474 |
| A_55_P2071 | 64.4 Detected    | 61 Detected      | 69.9 Detected    | 77 Detected      | Kcnma1        | 1.195652174 | 1.08540373 | 1.26229508 | 1.1459016 |
| A_55_P2180 | 50.1 Detected    | 30.6 Detected    | 56.4 Detected    | 59.9 Detected    | Mtch2         | 1.195608782 | 1.1257485  | 1.95751634 | 1.8431373 |
| A_55_P2044 | 14966.4 Detected | 12992.1 Detected | 15329.7 Detected | 17893.5 Detected | Vps29         | 1.195578095 | 1.02427437 | 1.37726003 | 1.1799247 |
| A_52_P7442 | 546.6 Detected   | 528.3 Detected   | 513.3 Detected   | 653.5 Detected   | Mms19         | 1.195572631 | 0.93907794 | 1.23698656 | 0.971607  |
| A_55_P2026 | 6368 Detected    | 6685.6 Detected  | 7909.7 Detected  | 7613.2 Detected  | Pdcd2l        | 1.195540201 | 1.24210113 | 1.13874596 | 1.183095  |
| A_55_P2087 | 720.1 Detected   | 680.1 Detected   | 672.3 Detected   | 860.9 Detected   | Specc1l       | 1.195528399 | 0.93362033 | 1.26584326 | 0.9885311 |
| A_55_P2003 | 1244.4 Detected  | 1158.1 Detected  | 1695.2 Detected  | 1487.7 Detected  | Gnpda1        | 1.195515911 | 1.36226294 | 1.28460409 | 1.4637769 |
| A_55_P2051 | 101.3 Detected   | 84.1 Detected    | 83.6 Detected    | 121.1 Detected   | Kdm2b         | 1.195459033 | 0.82527147 | 1.43995244 | 0.9940547 |
| A_52_P1880 | 39297.3 Detected | 37043.5 Detected | 41594.4 Detected | 46976.1 Detected | Eif3c         | 1.195402738 | 1.0584544  | 1.26813341 | 1.1228529 |
| A_51_P1564 | 1491.9 Detected  | 1572.9 Detected  | 1398 Detected    | 1783.4 Detected  | Slc25a33      | 1.195388431 | 0.93706012 | 1.13382923 | 0.8888041 |
| A_55_P1970 | 2106.2 Detected  | 1726.3 Detected  | 2270.6 Detected  | 2517.7 Detected  | Nr2c2         | 1.195375558 | 1.07805527 | 1.45843712 | 1.3152986 |
| A_55_P1998 | 30.2 Detected    | 37.4 Detected    | 24.3 Detected    | 36.1 Not Detect  | Gm3985        | 1.195364238 | 0.80463576 | 0.96524064 | 0.6497326 |
| A_55_P2024 | 2761.6 Detected  | 2809.7 Detected  | 2635.7 Detected  | 3300.9 Detected  | Gm10765       | 1.195285342 | 0.95441049 | 1.17482293 | 0.9380717 |
| A_55_P2021 | 18345.1 Detected | 19950.7 Detected | 18033.4 Detected | 21926.8 Detected | Elp5          | 1.195240146 | 0.98300909 | 1.09904916 | 0.9038981 |
| A_55_P1954 | 66.6 Detected    | 81 Detected      | 79.1 Detected    | 79.6 Detected    | Ugt3a1        | 1.195195195 | 1.18768769 | 0.98271605 | 0.9765432 |
| A_51_P4631 | 211.2 Detected   | 504 Detected     | 150.2 Detected   | 252.4 Detected   | Ptplad2       | 1.195075758 | 0.71117424 | 0.50079365 | 0.2980159 |
| A_55_P2050 | 7966 Detected    | 7314.5 Detected  | 9009.3 Detected  | 9519.7 Detected  | Ankrd27       | 1.195041426 | 1.13096912 | 1.30148335 | 1.2317041 |
| A_55_P2014 | 200 Detected     | 190.7 Detected   | 216 Detected     | 239 Detected     | Serpina11     | 1.195000000 | 1.19500000 | 1.2532774  | 1.1326691 |
| A_51_P3619 | 40029.2 Detected | 38135.5 Detected | 44762.7 Detected | 47829.8 Detected | Uqcrfs1       | 1.194872743 | 1.11825118 | 1.25420671 | 1.1737803 |
| A_51_P4148 | 4431.2 Detected  | 3884.3 Detected  | 3823.2 Detected  | 5294.5 Detected  | Ifi35         | 1.194823073 | 0.86279112 | 1.36305126 | 0.98427   |
| A_51_P2197 | 201.8 Detected   | 165.5 Detected   | 208.8 Detected   | 241.1 Detected   | Bpifa5        | 1.194747275 | 1.03468781 | 1.45679758 | 1.2616314 |
| A_55_P2167 | 8307.7 Detected  | 9264.4 Detected  | 8701.8 Detected  | 9925.2 Detected  | Cnnm3         | 1.194698894 | 1.04743792 | 1.0713268  | 0.9392729 |
| A_55_P2115 | 3306.3 Detected  | 3314.6 Detected  | 2212.6 Detected  | 3949.5 Detected  | Ikbip         | 1.194537701 | 0.66920727 | 1.19154649 | 0.6675315 |
| A_55_P1965 | 1178.1 Detected  | 1001.6 Detected  | 1438.1 Detected  | 1407.2 Detected  | Serpib6e      | 1.194465665 | 1.22069434 | 1.40495208 | 1.4358027 |
| A_55_P2123 | 3533.7 Detected  | 3952.4 Detected  | 3768.7 Detected  | 4220.6 Detected  | Slc35e1       | 1.194385488 | 1.06650253 | 1.0678575  | 0.9535219 |
| A_55_P2016 | 10837.3 Detected | 9037.4 Detected  | 8444.7 Detected  | 12943.5 Detected | Msl1          | 1.194347301 | 0.77922545 | 1.43221502 | 0.934417  |
| A_51_P3408 | 2222 Detected    | 1951.5 Detected  | 1875.5 Detected  | 2653.6 Detected  | Ipp           | 1.194239424 | 0.84405941 | 1.35977453 | 0.9610556 |
| A_65_P0846 | 102.5 Detected   | 87.7 Detected    | 98.9 Detected    | 122.4 Detected   | Tlk2          | 1.194146341 | 0.96487805 | 1.39566705 | 1.1277081 |
| A_55_P2008 | 3194.7 Detected  | 3764.2 Detected  | 3722 Detected    | 3814.9 Detected  | Cdkn2a        | 1.194134034 | 1.16505462 | 1.013469   | 0.9887891 |
| A_66_P1016 | 376.1 Detected   | 324.3 Detected   | 416.8 Detected   | 449.1 Detected   | Zfp27         | 1.194097315 | 1.1082159  | 1.38482886 | 1.2852297 |
| A_55_P2077 | 740.5 Detected   | 504.1 Detected   | 555 Detected     | 884.2 Detected   | Vps8          | 1.194058069 | 0.74949359 | 1.75401706 | 1.100972  |
| A_51_P3659 | 3718.8 Detected  | 4716.9 Detected  | 2092.2 Detected  | 4440.3 Detected  | 2310022B05Rik | 1.194014198 | 0.56260084 | 0.94135979 | 0.443554  |
| A_55_P2022 | 1791.7 Detected  | 1684.1 Detected  | 2580.9 Detected  | 2139.3 Detected  | Dhcr7         | 1.194005693 | 1.44047553 | 1.27029274 | 1.5325099 |
| A_52_P4187 | 19046.6 Detected | 14765 Detected   | 17808 Detected   | 22741.7 Detected | Rnf220        | 1.194003129 | 0.93497002 | 1.54024382 | 1.2060955 |
| A_51_P4461 | 318.1 Detected   | 301.5 Detected   | 284.6 Detected   | 379.8 Detected   | Lrrc38        | 1.193964162 | 0.89468721 | 1.25970149 | 0.9439469 |
| A_55_P2236 | 917.9 Detected   | 869.4 Detected   | 171.9 Detected   | 1095.8 Detected  | D8Erd158e     | 1.193811962 | 0.1872753  | 1.26040948 | 0.1977226 |

|            |                   |                   |                   |                   |               |             |            |            |           |
|------------|-------------------|-------------------|-------------------|-------------------|---------------|-------------|------------|------------|-----------|
| A_55_P2110 | 935.1 Detected    | 894.7 Detected    | 1090.7 Detected   | 1116.3 Detected   | Slc35a2       | 1.193776067 | 1.16639932 | 1.24768079 | 1.2190678 |
| A_55_P2057 | 3131.5 Detected   | 2415.6 Detected   | 3778.7 Detected   | 3738 Detected     | Golga1        | 1.193677152 | 1.20667412 | 1.54744163 | 1.5642904 |
| A_52_P1388 | 87.8 Detected     | 93.6 Detected     | 81.8 Detected     | 104.8 Detected    | Qsox2         | 1.193621868 | 0.93166287 | 1.11965812 | 0.8739316 |
| A_52_P4915 | 1155 Detected     | 616.3 Detected    | 967.2 Detected    | 1378.4 Detected   | Nedd9         | 1.193419913 | 0.8374026  | 2.2365731  | 1.5693656 |
| A_55_P1975 | 12551.6 Detected  | 13835.2 Detected  | 11828.5 Detected  | 14978.1 Detected  | Mdm2          | 1.193321967 | 0.94238981 | 1.08260813 | 0.8549569 |
| A_51_P1818 | 12926.5 Detected  | 10050.4 Detected  | 15659.8 Detected  | 15425 Detected    | Eml3          | 1.193285112 | 1.21144935 | 1.53476479 | 1.558127  |
| A_51_P2913 | 9706.2 Detected   | 9556.2 Detected   | 7289.9 Detected   | 11581.3 Detected  | Pafah1b1      | 1.193185799 | 0.75105603 | 1.21191478 | 0.7628451 |
| A_55_P2054 | 2674.9 Detected   | 3172.2 Detected   | 2546.1 Detected   | 3191.6 Detected   | Trappc1       | 1.1931661   | 0.95184867 | 1.00611563 | 0.8026291 |
| A_55_P1958 | 786.4 Detected    | 552.6 Detected    | 1214.5 Detected   | 938.2 Detected    | Arrdc1        | 1.193031536 | 1.54437945 | 1.69779225 | 2.1977923 |
| A_55_P2219 | 48.7 Detected     | 33.4 Detected     | 50.4 Detected     | 58.1 Detected     | C76332        | 1.19301848  | 1.0349076  | 1.73952096 | 1.508982  |
| A_55_P2166 | 6157.9 Detected   | 5940 Detected     | 8052.3 Detected   | 7346.4 Detected   | Rpusd3        | 1.193004109 | 1.30763734 | 1.23676768 | 1.3556061 |
| A_51_P3869 | 1284.1 Detected   | 1314.1 Detected   | 1672.6 Detected   | 1531.9 Detected   | Taco1         | 1.192975625 | 1.30254653 | 1.16574081 | 1.2728103 |
| A_51_P2493 | 16.6 Detected     | 5.9 Not Detect    | 11.9 Not Detect   | 19.8 Not Detect   | Sds           | 1.192771084 | 0.71686747 | 3.3559322  | 2.0169492 |
| A_55_P2216 | 8.3 Not Detect    | 15.5 Detected     | 8.5 Not Detect    | 9.9 Not Detect    | 2610209C05Rik | 1.192771084 | 1.02409639 | 0.63870968 | 0.5483871 |
| A_55_P2034 | 13629.8 Detected  | 12443.6 Detected  | 13691.6 Detected  | 16257.2 Detected  | Ctdsp1        | 1.192768786 | 1.00453418 | 1.3064708  | 1.1002925 |
| A_51_P2108 | 17361.3 Detected  | 14465.3 Detected  | 19671.3 Detected  | 20708 Detected    | Pcnp          | 1.192767823 | 1.13305455 | 1.43156381 | 1.3598958 |
| A_55_P2131 | 1371.1 Detected   | 1085.6 Detected   | 1500.1 Detected   | 1635.4 Detected   | 1110059G10Rik | 1.192764933 | 1.09408504 | 1.50644805 | 1.3818165 |
| A_55_P2068 | 15679 Detected    | 16692.5 Detected  | 14412.2 Detected  | 18699.2 Detected  | Nudc          | 1.192627081 | 0.91920403 | 1.12021567 | 0.8633937 |
| A_55_P2178 | 773.4 Detected    | 1011.4 Detected   | 517 Detected      | 922.3 Detected    | Dnmt3a        | 1.192526506 | 0.66847686 | 0.91190429 | 0.5111726 |
| A_55_P2115 | 26.5 Detected     | 31 Detected       | 21.7 Detected     | 31.6 Not Detect   | Fmr1nb        | 1.19245283  | 0.81886792 | 1.01935484 | 0.7       |
| A_52_P4803 | 7721.5 Detected   | 9227 Detected     | 7737 Detected     | 9207.2 Detected   | Loxl2         | 1.192410801 | 1.00200738 | 0.99785412 | 0.8385174 |
| A_55_P2068 | 404.4 Detected    | 377.2 Detected    | 351.6 Detected    | 482.2 Detected    | Sun5          | 1.192383778 | 0.8694362  | 1.27836691 | 0.9321315 |
| A_55_P2007 | 152.4 Detected    | 173.1 Detected    | 163.2 Detected    | 181.7 Detected    | Ift74         | 1.192257218 | 1.07086614 | 1.04968226 | 0.9428076 |
| A_51_P2406 | 310774.8 Detected | 383293.5 Detected | 283466.7 Detected | 370507.1 Detected | Tm4sf1        | 1.192204452 | 0.91212898 | 0.96664071 | 0.7395552 |
| A_55_P2047 | 38639.1 Detected  | 35726.7 Detected  | 34509 Detected    | 46064.9 Detected  | Bfar          | 1.192183565 | 0.89311086 | 1.28936902 | 0.9659162 |
| A_51_P1411 | 2658.6 Detected   | 2871.5 Detected   | 2696.9 Detected   | 3169.5 Detected   | Ddx50         | 1.192168811 | 1.01440608 | 1.10377851 | 0.9391955 |
| A_55_P1978 | 4032.3 Detected   | 3065.4 Detected   | 3880.6 Detected   | 4807 Detected     | Kmt2b         | 1.192123602 | 0.96237879 | 1.56814771 | 1.2659359 |
| A_55_P1955 | 247200 Detected   | 304582.7 Detected | 294039.7 Detected | 294688.8 Detected | Gm12070       | 1.192106796 | 1.18948099 | 0.96751654 | 0.9653854 |
| A_51_P5079 | 7908.4 Detected   | 7483.2 Detected   | 6469.4 Detected   | 9427 Detected     | Atp13a2       | 1.192023671 | 0.81804158 | 1.25975518 | 0.8645232 |
| A_66_P1354 | 40.1 Detected     | 46.6 Detected     | 42.8 Detected     | 47.8 Not Detect   | AI481877      | 1.19201995  | 1.06733167 | 1.02575107 | 0.9184549 |
| A_55_P2108 | 61758.4 Detected  | 42494 Detected    | 77358.9 Detected  | 73608.5 Detected  | Mtch2         | 1.191878352 | 1.25260531 | 1.73220925 | 1.8204664 |
| A_55_P1989 | 1244.6 Detected   | 974.9 Detected    | 1378.3 Detected   | 1483.4 Detected   | AI987944      | 1.191868874 | 1.10742407 | 1.52159196 | 1.413786  |
| A_51_P3863 | 19497.9 Detected  | 22519.8 Detected  | 13626.4 Detected  | 23238.3 Detected  | Wwp2          | 1.191836044 | 0.69886501 | 1.03190526 | 0.6050853 |
| A_55_P2012 | 20924.7 Detected  | 18758 Detected    | 22202.6 Detected  | 24937 Detected    | Twf1          | 1.191749464 | 1.06107137 | 1.32940612 | 1.1836336 |
| A_55_P2016 | 112.2 Detected    | 137 Detected      | 110.9 Detected    | 133.7 Detected    | Mrpl47        | 1.191622103 | 0.98841355 | 0.97591241 | 0.8094891 |
| A_55_P2004 | 108.1 Detected    | 120.5 Detected    | 78.2 Detected     | 128.8 Detected    | Prrg1         | 1.191489362 | 0.72340426 | 1.06887967 | 0.6489627 |
| A_55_P2013 | 7937.4 Detected   | 7128 Detected     | 7172.3 Detected   | 9456.5 Detected   | Cd4           | 1.191385088 | 0.90360823 | 1.32666947 | 1.0062149 |
| A_55_P2181 | 85.7 Detected     | 90.7 Detected     | 85.1 Detected     | 102.1 Detected    | Fndc9         | 1.191365228 | 0.99299883 | 1.12568908 | 0.938258  |
| A_51_P2565 | 16.2 Detected     | 7 Not Detect      | 3.4 Not Detect    | 19.3 Not Detect   | Gm3527        | 1.191358025 | 0.20987654 | 2.75714286 | 0.4857143 |
| A_52_P3414 | 2228.7 Detected   | 2069.6 Detected   | 2390.1 Detected   | 2655.1 Detected   | Pgm3          | 1.191322296 | 1.0724189  | 1.28290491 | 1.1548608 |

|            |          |          |          |          |          |          |          |           |               |             |            |            |           |
|------------|----------|----------|----------|----------|----------|----------|----------|-----------|---------------|-------------|------------|------------|-----------|
| A_55_P2047 | 390.5    | Detected | 277.3    | Detected | 339.7    | Detected | 465.2    | Detected  | Serac1        | 1.191293214 | 0.86991037 | 1.67760548 | 1.225027  |
| A_55_P2161 | 1653.8   | Detected | 1521     | Detected | 1554.1   | Detected | 1970     | Detected  | Mpp3          | 1.191196033 | 0.9397146  | 1.29520053 | 1.021762  |
| A_55_P1975 | 43472.2  | Detected | 50931.7  | Detected | 59319.2  | Detected | 51777.5  | Detected  | Sqlc          | 1.191048532 | 1.36453182 | 1.01660655 | 1.1646813 |
| A_55_P2184 | 57158.4  | Detected | 49356.6  | Detected | 80354.9  | Detected | 68071.3  | Detected  | Ndufv3        | 1.190923819 | 1.40582836 | 1.3791732  | 1.6280477 |
| A_52_P1183 | 9659.9   | Detected | 5904.1   | Detected | 12155.3  | Detected | 11503.9  | Detected  | Opa3          | 1.190892245 | 1.25832566 | 1.94845955 | 2.0587897 |
| A_55_P2119 | 1345.9   | Detected | 1594     | Detected | 1819.1   | Detected | 1602.8   | Detected  | Plekhj1       | 1.190875994 | 1.3515863  | 1.0055207  | 1.1412171 |
| A_51_P4834 | 52.4     | Detected | 47.8     | Detected | 45.5     | Detected | 62.4     | Detected  | Kif26b        | 1.190839695 | 0.86832061 | 1.30543933 | 0.9518828 |
| A_52_P4114 | 237.9    | Detected | 260.2    | Detected | 183.4    | Detected | 283.3    | Detected  | Gm5914        | 1.190836486 | 0.77091215 | 1.08877786 | 0.7048424 |
| A_55_P2022 | 843.9    | Detected | 697.1    | Detected | 763      | Detected | 1004.9   | Detected  | Nfe2l1        | 1.190780898 | 0.90413556 | 1.44154354 | 1.0945345 |
| A_66_P1402 | 286.3    | Detected | 263.8    | Detected | 270.7    | Detected | 340.9    | Detected  | Gzmk          | 1.190709046 | 0.9455117  | 1.29226687 | 1.0261562 |
| A_55_P2097 | 206.1    | Detected | 204      | Detected | 287      | Detected | 245.4    | Detected  | Slx1b         | 1.190684134 | 1.3925279  | 1.20294118 | 1.4068627 |
| A_55_P2093 | 252086.9 | Detected | 276665.2 | Detected | 241165.7 | Detected | 300146.4 | Detected  | Zfp408        | 1.190646559 | 0.95667684 | 1.08487226 | 0.8716879 |
| A_51_P1068 | 7896.3   | Detected | 5204.5   | Detected | 7547.1   | Detected | 9401.6   | Detected  | Lsm10         | 1.190633588 | 0.95577676 | 1.80643674 | 1.4501105 |
| A_55_P2101 | 176.8    | Detected | 183.4    | Detected | 158.6    | Detected | 210.5    | Detected  | Ptchd3        | 1.19061086  | 0.89705882 | 1.14776445 | 0.8647764 |
| A_55_P2028 | 308      | Detected | 423      | Detected | 267.8    | Detected | 366.7    | Detected  | Trappc1       | 1.190584416 | 0.86948052 | 0.86690307 | 0.6330969 |
| A_51_P2909 | 704.5    | Detected | 653.7    | Detected | 728.4    | Detected | 838.7    | Detected  | Raver2        | 1.190489709 | 1.03392477 | 1.28300444 | 1.1142726 |
| A_55_P2182 | 11122.2  | Detected | 9975.1   | Detected | 8342.5   | Detected | 13240.7  | Detected  | Rab3c         | 1.190474906 | 0.75007642 | 1.32737516 | 0.8363325 |
| A_55_P1958 | 28295.8  | Detected | 26401.4  | Detected | 29783.8  | Detected | 33684.1  | Detected  | Zfp692        | 1.190427555 | 1.05258731 | 1.27584522 | 1.1281144 |
| A_51_P2345 | 9560.8   | Detected | 11837.4  | Detected | 10485.9  | Detected | 11380.9  | Detected  | Azin1         | 1.190371099 | 1.09675969 | 0.96143579 | 0.885828  |
| A_65_P1297 | 15315.6  | Detected | 18222.2  | Detected | 13667.1  | Detected | 18230.8  | Detected  | Dnaja2        | 1.190341874 | 0.89236465 | 1.00047195 | 0.7500247 |
| A_55_P2028 | 3359.7   | Detected | 2732.4   | Detected | 2609     | Detected | 3998.9   | Detected  | 3110043O21Rik | 1.190255082 | 0.77655743 | 1.46351193 | 0.9548382 |
| A_55_P2085 | 240.8    | Detected | 229.7    | Detected | 206.1    | Detected | 286.6    | Detected  | Fbxo44        | 1.190199336 | 0.85589701 | 1.24771441 | 0.8972573 |
| A_55_P2045 | 40413.7  | Detected | 46568.2  | Detected | 36412.1  | Detected | 48100.2  | Detected  | Sigmar1       | 1.190195404 | 0.90098407 | 1.03289799 | 0.7819091 |
| A_55_P2049 | 284.5    | Detected | 288.7    | Detected | 207.1    | Detected | 338.6    | Detected  | Efn2          | 1.190158172 | 0.72794376 | 1.17284378 | 0.7173537 |
| A_55_P2362 | 190.4    | Detected | 221.7    | Detected | 206.5    | Detected | 226.6    | Detected  | 4921516112Rik | 1.19012605  | 1.08455882 | 1.02210194 | 0.9314389 |
| A_51_P5108 | 10400.3  | Detected | 4943.2   | Detected | 8681.3   | Detected | 12377.5  | Detected  | Tmem50b       | 1.190109901 | 0.83471631 | 2.50394481 | 1.7562106 |
| A_55_P1989 | 2099.2   | Detected | 781.4    | Detected | 2367.6   | Detected | 2498.2   | Compromis | Tnxb          | 1.190072409 | 1.12785823 | 3.19708216 | 3.0299463 |
| A_55_P2044 | 418.4    | Detected | 413.7    | Detected | 377.9    | Detected | 497.9    | Detected  | Zfp74         | 1.19000956  | 0.90320268 | 1.20352913 | 0.9134639 |
| A_51_P4244 | 115250   | Detected | 119316.9 | Detected | 119788.4 | Detected | 137128.5 | Detected  | Txn1          | 1.189835141 | 1.03937874 | 1.14927978 | 1.0039517 |
| A_55_P2156 | 90.1     | Detected | 96.7     | Detected | 87.9     | Detected | 107.2    | Detected  | Kcnk15        | 1.189789123 | 0.97558269 | 1.10858325 | 0.9089969 |
| A_55_P2043 | 199.7    | Detected | 226.1    | Detected | 181      | Detected | 237.6    | Detected  | Trpm1         | 1.189784677 | 0.90635954 | 1.05086245 | 0.8005307 |
| A_51_P5037 | 77       | Detected | 85.8     | Detected | 70       | Detected | 91.6     | Detected  | Tex19.2       | 1.18961039  | 0.90909091 | 1.06759907 | 0.8158508 |
| A_51_P4974 | 779.2    | Detected | 773.9    | Detected | 857.6    | Detected | 926.9    | Detected  | Dedd          | 1.189553388 | 1.10061602 | 1.19769996 | 1.1081535 |
| A_51_P4079 | 60.7     | Detected | 53.4     | Detected | 67.3     | Detected | 72.2     | Detected  | Grifin        | 1.189456343 | 1.10873147 | 1.35205993 | 1.2602996 |
| A_52_P4859 | 19966.6  | Detected | 18138.4  | Detected | 21095.9  | Detected | 23748.1  | Detected  | Scap          | 1.189391283 | 1.05655945 | 1.30927204 | 1.1630519 |
| A_55_P2102 | 52612.7  | Detected | 54802.8  | Detected | 53179.6  | Detected | 62568.5  | Detected  | Eif1          | 1.189228076 | 1.01077496 | 1.14170261 | 0.9703811 |
| A_55_P2316 | 207.2    | Detected | 196.6    | Detected | 219.8    | Detected | 246.4    | Detected  | Grm5          | 1.189189189 | 1.06081081 | 1.25330621 | 1.1180061 |
| A_51_P4367 | 6961     | Detected | 5148.5   | Detected | 3212.2   | Detected | 8277.7   | Detected  | Arrb1         | 1.189153857 | 0.46145669 | 1.60778868 | 0.6239099 |
| A_55_P1988 | 108.4    | Detected | 266.4    | Detected | 199.9    | Detected | 128.9    | Detected  | Gng7          | 1.189114391 | 1.84409594 | 0.48385886 | 0.7503754 |
| A_51_P1409 | 122.7    | Detected | 112.6    | Detected | 137.9    | Detected | 145.9    | Detected  | 4930519P11Rik | 1.189079055 | 1.12387938 | 1.29573712 | 1.2246892 |

|            |          |          |          |          |          |          |          |          |               |             |            |            |           |
|------------|----------|----------|----------|----------|----------|----------|----------|----------|---------------|-------------|------------|------------|-----------|
| A_55_P2103 | 259.7    | Detected | 188      | Detected | 124      | Detected | 308.8    | Detected | Dusp8         | 1.189064305 | 0.47747401 | 1.64255319 | 0.6595745 |
| A_51_P3678 | 41918.5  | Detected | 48105.5  | Detected | 57553.5  | Detected | 49836.9  | Detected | Polr2g        | 1.188899889 | 1.37298567 | 1.03599173 | 1.1964017 |
| A_55_P2122 | 332.1    | Detected | 437.2    | Detected | 448.2    | Detected | 394.8    | Detected | Pnpt1         | 1.188798555 | 1.3495935  | 0.90301921 | 1.0251601 |
| A_55_P2011 | 64.1     | Detected | 60       | Detected | 60.5     | Detected | 76.2     | Detected | 1600010M07Rik | 1.188767551 | 0.94383775 | 1.27       | 1.0083333 |
| A_55_P1992 | 152181.1 | Detected | 161377.4 | Detected | 122044   | Detected | 180895.9 | Detected | Ap1s1         | 1.188688346 | 0.80196555 | 1.1209494  | 0.7562645 |
| A_55_P2086 | 23264.4  | Detected | 39066.1  | Detected | 22177    | Detected | 27652.2  | Detected | Ppid          | 1.188605767 | 0.95325906 | 0.70783109 | 0.5676789 |
| A_55_P2041 | 977.2    | Detected | 965.6    | Detected | 972.3    | Detected | 1161.4   | Detected | Evx2          | 1.188497749 | 0.99498567 | 1.20277548 | 1.0069387 |
| A_55_P1968 | 4337.7   | Detected | 4068.2   | Detected | 4172.1   | Detected | 5155.3   | Detected | Def6          | 1.188486986 | 0.96182309 | 1.26721892 | 1.0255396 |
| A_52_P2280 | 1835.6   | Detected | 1948.6   | Detected | 1873.5   | Detected | 2181.5   | Detected | Atf1          | 1.188439747 | 1.0206472  | 1.11952171 | 0.9614595 |
| A_55_P2134 | 204.4    | Detected | 177.6    | Detected | 175.7    | Detected | 242.9    | Detected | Krtap10-4     | 1.188356164 | 0.85958904 | 1.36768018 | 0.9893018 |
| A_55_P2015 | 1275.6   | Detected | 1355.6   | Detected | 1418.4   | Detected | 1515.8   | Detected | Ltc4s         | 1.188303543 | 1.11194732 | 1.11817645 | 1.0463263 |
| A_52_P2887 | 212      | Detected | 198.2    | Detected | 200.1    | Detected | 251.9    | Detected | Gm527         | 1.188207547 | 0.94386792 | 1.27093845 | 1.0095863 |
| A_51_P1501 | 59033.6  | Detected | 53632.5  | Detected | 102237.5 | Detected | 70140.9  | Detected | Mgst2         | 1.188152171 | 1.73185271 | 1.3078059  | 1.9062602 |
| A_52_P3892 | 486.5    | Detected | 494      | Detected | 342.9    | Detected | 578      | Detected | Smarcc2       | 1.188078109 | 0.70483042 | 1.17004049 | 0.6941296 |
| A_66_P1117 | 2825.8   | Detected | 2688.2   | Detected | 3885.1   | Detected | 3357.1   | Detected | Znrf2         | 1.188017553 | 1.37486729 | 1.24882821 | 1.4452422 |
| A_66_P1394 | 9270.6   | Detected | 5567.7   | Detected | 9694.1   | Detected | 11012.6  | Detected | C330006A16Rik | 1.187905853 | 1.04568205 | 1.97794421 | 1.7411319 |
| A_66_P1298 | 1482.2   | Detected | 1247.6   | Detected | 1353.1   | Detected | 1760.4   | Detected | Rab8b         | 1.187693968 | 0.91289974 | 1.41102918 | 1.0845624 |
| A_51_P1387 | 1365.1   | Detected | 1186     | Detected | 1497.4   | Detected | 1621.1   | Detected | Plekhf2       | 1.187532049 | 1.09691598 | 1.36686341 | 1.2625632 |
| A_55_P1953 | 634.6    | Detected | 562.4    | Detected | 743.8    | Detected | 753.6    | Detected | Tnfsf12       | 1.187519697 | 1.1720769  | 1.33997155 | 1.3225462 |
| A_66_P1292 | 123.2    | Detected | 125.4    | Detected | 149.7    | Detected | 146.3    | Detected | Raver1        | 1.1875      | 1.2150974  | 1.16666667 | 1.1937799 |
| A_55_P1965 | 2854.6   | Detected | 2335.7   | Detected | 2352.8   | Detected | 3389.8   | Detected | Klhl18        | 1.187486863 | 0.82421355 | 1.4512994  | 1.0073211 |
| A_51_P1744 | 4695.7   | Detected | 3580.7   | Detected | 4730.3   | Detected | 5576     | Detected | Fam134a       | 1.187469387 | 1.00736844 | 1.55723741 | 1.3210545 |
| A_51_P2225 | 12190.2  | Detected | 11649    | Detected | 13817.1  | Detected | 14475.1  | Detected | Arf6          | 1.18743745  | 1.13345966 | 1.24260452 | 1.186119  |
| A_55_P2007 | 84.3     | Detected | 88       | Detected | 124.7    | Detected | 100.1    | Detected | Gm9112        | 1.18742586  | 1.47924081 | 1.1375     | 1.4170455 |
| A_55_P1998 | 73.1     | Detected | 189.5    | Detected | 72.1     | Detected | 86.8     | Detected | Speg          | 1.187414501 | 0.98632011 | 0.45804749 | 0.3804749 |
| A_66_P1373 | 1186.7   | Detected | 1099.2   | Detected | 1359.4   | Detected | 1409.1   | Detected | Ddx55         | 1.187410466 | 1.14552962 | 1.28193231 | 1.2367176 |
| A_51_P1921 | 1519.4   | Detected | 983.1    | Detected | 1182.9   | Detected | 1804.1   | Detected | Diap2         | 1.187376596 | 0.778531   | 1.83511342 | 1.2032347 |
| A_51_P4663 | 174      | Detected | 170.4    | Detected | 182.6    | Detected | 206.6    | Detected | Itgal         | 1.187356322 | 1.04942529 | 1.21244131 | 1.0715962 |
| A_52_P2516 | 11627    | Detected | 11559.3  | Detected | 11916.9  | Detected | 13805    | Detected | Arhgef40      | 1.187322611 | 1.02493334 | 1.19427647 | 1.0309361 |
| A_52_P5250 | 131.9    | Detected | 208.9    | Detected | 129.1    | Detected | 156.6    | Detected | Vamp4         | 1.187263078 | 0.9787718  | 0.74964098 | 0.617999  |
| A_55_P2347 | 954.3    | Detected | 1559.7   | Detected | 1098.3   | Detected | 1133     | Detected | Mir17hg       | 1.187257676 | 1.15089594 | 0.72642175 | 0.7041739 |
| A_55_P2461 | 643.8    | Detected | 444.6    | Detected | 640.5    | Detected | 764.3    | Detected | Guf1          | 1.187169929 | 0.99487418 | 1.71907332 | 1.4406208 |
| A_52_P6781 | 91.9     | Detected | 123.8    | Detected | 56.1     | Detected | 109.1    | Detected | Faf1          | 1.187159956 | 0.61044614 | 0.8812601  | 0.4531502 |
| A_52_P5404 | 3260.6   | Detected | 2829.2   | Detected | 2991.1   | Detected | 3870.5   | Detected | Zfp407        | 1.187051463 | 0.9173465  | 1.36805457 | 1.0572247 |
| A_55_P2158 | 710.5    | Detected | 643.6    | Detected | 594.1    | Detected | 843.4    | Detected | Aanat         | 1.187051372 | 0.83617171 | 1.31044127 | 0.9230889 |
| A_52_P3130 | 3020.8   | Detected | 2828     | Detected | 2675     | Detected | 3585.8   | Detected | Gosr1         | 1.187036547 | 0.88552701 | 1.26796322 | 0.9458982 |
| A_52_P6519 | 254.5    | Detected | 377.5    | Detected | 487.9    | Detected | 302.1    | Detected | Fam229b       | 1.187033399 | 1.91709234 | 0.8002649  | 1.2924503 |
| A_51_P2906 | 960      | Detected | 1080.6   | Detected | 1467.1   | Detected | 1139.5   | Detected | Ppp6r3        | 1.186979167 | 1.52822917 | 1.05450676 | 1.3576717 |
| A_55_P2099 | 1519.9   | Detected | 1324.6   | Detected | 1632.5   | Detected | 1804     | Detected | Akt1s1        | 1.186920192 | 1.07408382 | 1.36192058 | 1.2324475 |
| A_55_P2120 | 4666.9   | Detected | 5338.4   | Detected | 4855.5   | Detected | 5539     | Detected | Cited2        | 1.186869228 | 1.04041227 | 1.0375768  | 0.9095422 |

|            |                  |                  |                  |                  |               |             |            |            |           |
|------------|------------------|------------------|------------------|------------------|---------------|-------------|------------|------------|-----------|
| A_55_P2116 | 132.2 Detected   | 132.4 Detected   | 113 Detected     | 156.9 Detected   | Myo1c         | 1.186838124 | 0.85476551 | 1.18504532 | 0.8534743 |
| A_52_P5761 | 416.1 Detected   | 556 Detected     | 418.5 Detected   | 493.8 Detected   | Thap1         | 1.186733958 | 1.00576784 | 0.8881295  | 0.7526978 |
| A_51_P3794 | 14737 Detected   | 17354.1 Detected | 19207.7 Detected | 17487.6 Detected | Bclaf1        | 1.186645857 | 1.30336568 | 1.00769271 | 1.1068105 |
| A_55_P1962 | 121.1 Detected   | 106.4 Detected   | 104.3 Detected   | 143.7 Detected   | Clec1b        | 1.186622626 | 0.86127168 | 1.35056391 | 0.9802632 |
| A_52_P1051 | 3683.4 Detected  | 4425.7 Detected  | 3388.6 Detected  | 4370.6 Detected  | Frs2          | 1.186566759 | 0.91996525 | 0.98754999 | 0.7656642 |
| A_55_P2056 | 817.8 Detected   | 539.9 Detected   | 619 Detected     | 970.3 Detected   | Tanc1         | 1.186475911 | 0.75690878 | 1.79718466 | 1.1465086 |
| A_55_P2045 | 201.2 Detected   | 360.3 Detected   | 214.4 Detected   | 238.7 Detected   | Cpeb2         | 1.18638171  | 1.06560636 | 0.66250347 | 0.5950597 |
| A_55_P2129 | 14648.4 Detected | 15087 Detected   | 15719.9 Detected | 17377.9 Detected | Smarbcb1      | 1.186334344 | 1.07314792 | 1.15184596 | 1.04195   |
| A_55_P2185 | 9204.9 Detected  | 7770.3 Detected  | 6348.9 Detected  | 10919.9 Detected | Samd4b        | 1.186313811 | 0.68973047 | 1.40533828 | 0.8170727 |
| A_55_P2002 | 23478.6 Detected | 30072.6 Detected | 24418.1 Detected | 27850.2 Detected | Hmgb1         | 1.186195088 | 1.04001516 | 0.92609884 | 0.8119717 |
| A_55_P2179 | 2623 Detected    | 1878.9 Detected  | 2848.1 Detected  | 3111.3 Detected  | Mad2l1        | 1.186160884 | 1.08581777 | 1.6559157  | 1.5158337 |
| A_55_P2061 | 82.2 Detected    | 230.7 Detected   | 101.1 Detected   | 97.5 Detected    | Slc16a11      | 1.186131387 | 1.22992701 | 0.42262679 | 0.4382315 |
| A_51_P1664 | 129 Detected     | 240.1 Detected   | 206.5 Detected   | 153 Detected     | Fzd5          | 1.186046512 | 1.60077519 | 0.63723449 | 0.8600583 |
| A_52_P3124 | 328.6 Detected   | 212.6 Detected   | 12.4 Not Detect  | 389.7 Detected   | Hoxb3         | 1.185940353 | 0.03773585 | 1.83301976 | 0.0583255 |
| A_55_P2046 | 2857 Detected    | 2285.8 Detected  | 3248.9 Detected  | 3388.2 Detected  | Mapkap1       | 1.185929296 | 1.13717186 | 1.48228191 | 1.4213404 |
| A_52_P1181 | 144.7 Detected   | 119.2 Detected   | 154.1 Detected   | 171.6 Detected   | Slc6a16       | 1.185901866 | 1.06496199 | 1.43959732 | 1.2927852 |
| A_55_P2049 | 31.2 Detected    | 47 Detected      | 37.3 Detected    | 37 Not Detect    | Ube2d2b       | 1.185897436 | 1.19551282 | 0.78723404 | 0.793617  |
| A_55_P1991 | 32.3 Detected    | 30.6 Detected    | 37.1 Detected    | 38.3 Not Detect  | Cnga3         | 1.185758514 | 1.14860681 | 1.25163399 | 1.2124183 |
| A_52_P4731 | 30.7 Detected    | 30.3 Detected    | 21.6 Detected    | 36.4 Not Detect  | Otos          | 1.185667752 | 0.70358306 | 1.20132013 | 0.7128713 |
| A_55_P2170 | 3865 Detected    | 3408.3 Detected  | 3502.4 Detected  | 4582.6 Detected  | Ggps1         | 1.185666235 | 0.9061837  | 1.34454127 | 1.0276091 |
| A_52_P1128 | 2875.7 Detected  | 3026.5 Detected  | 2373.8 Detected  | 3409.6 Detected  | BC023829      | 1.185659144 | 0.82546858 | 1.12658186 | 0.7843383 |
| A_55_P1989 | 9.7 Not Detect   | 18.2 Detected    | 13.5 Not Detect  | 11.5 Not Detect  | Olf10         | 1.18556701  | 1.39175258 | 0.63186813 | 0.7417582 |
| A_55_P1998 | 132.6 Detected   | 175.4 Detected   | 301.6 Detected   | 157.2 Detected   | Slc17a9       | 1.185520362 | 2.2745098  | 0.89623717 | 1.7194983 |
| A_55_P2070 | 44.2 Detected    | 33.3 Detected    | 49.2 Detected    | 52.4 Not Detect  | 1700037C18Rik | 1.185520362 | 1.11312217 | 1.57357357 | 1.4774775 |
| A_51_P3041 | 5446 Detected    | 7842.8 Detected  | 5411.7 Detected  | 6456.3 Detected  | Necap1        | 1.185512303 | 0.9937018  | 0.82321365 | 0.6900214 |
| A_55_P2023 | 1320.8 Detected  | 1101.2 Detected  | 1100.9 Detected  | 1565.8 Detected  | Leng8         | 1.18549364  | 0.83350999 | 1.42190338 | 0.9997276 |
| A_55_P2056 | 36955.4 Detected | 33679.7 Detected | 41373.7 Detected | 43809.7 Detected | Kif22         | 1.185474924 | 1.11955763 | 1.30077465 | 1.2284462 |
| A_55_P2113 | 3511.6 Detected  | 2686.1 Detected  | 2346.9 Detected  | 4162.3 Detected  | Raph1         | 1.185300148 | 0.66832783 | 1.54957001 | 0.8737203 |
| A_55_P2111 | 806.3 Detected   | 1186.1 Detected  | 744.9 Detected   | 955.7 Detected   | 3110009E18Rik | 1.185290835 | 0.92384968 | 0.80574994 | 0.6280246 |
| A_55_P2109 | 310.9 Detected   | 348.8 Detected   | 318.8 Detected   | 368.5 Detected   | Vash1         | 1.185268575 | 1.0254101  | 1.05647936 | 0.9139908 |
| A_55_P1991 | 11911.6 Detected | 15712.8 Detected | 17069.3 Detected | 14118 Detected   | Rad51ap1      | 1.185231203 | 1.43299809 | 0.89850313 | 1.0863309 |
| A_55_P2363 | 175.5 Detected   | 131.2 Detected   | 95.6 Detected    | 208 Detected     | 2610020P09Rik | 1.185185185 | 0.54472934 | 1.58536585 | 0.7286585 |
| A_55_P2107 | 148.5 Detected   | 115.1 Detected   | 131.6 Detected   | 176 Detected     | Ggn           | 1.185185185 | 0.88619529 | 1.52910513 | 1.1433536 |
| A_51_P4752 | 1695.3 Detected  | 1777.4 Detected  | 1735.4 Detected  | 2009.2 Detected  | Moap1         | 1.185158969 | 1.02365363 | 1.13041521 | 0.97637   |
| A_55_P2137 | 17127 Detected   | 17763.8 Detected | 18831 Detected   | 20296.4 Detected | Tmpo          | 1.185052841 | 1.09949203 | 1.14257085 | 1.0600772 |
| A_51_P1858 | 4702.1 Detected  | 5529.6 Detected  | 4189.5 Detected  | 5571.9 Detected  | Dnal4         | 1.184981179 | 0.89098488 | 1.00764974 | 0.7576497 |
| A_51_P4690 | 1144 Detected    | 910.2 Detected   | 1261 Detected    | 1355.6 Detected  | Mfsd4         | 1.184965035 | 1.10227273 | 1.489343   | 1.3854098 |
| A_51_P1630 | 829.4 Detected   | 796 Detected     | 715.6 Detected   | 982.8 Detected   | Ptcd1         | 1.184952978 | 0.86279238 | 1.23467337 | 0.898995  |
| A_55_P2154 | 11914.8 Detected | 10871.4 Detected | 12237.5 Detected | 14117.5 Detected | Klhl9         | 1.184870917 | 1.02708396 | 1.2985908  | 1.12566   |
| A_55_P2048 | 37803.8 Detected | 38061.4 Detected | 50246.3 Detected | 44791.6 Detected | Ganab         | 1.184843852 | 1.32913358 | 1.17682481 | 1.320138  |

|            |          |            |          |            |          |            |          |            |               |             |            |            |           |
|------------|----------|------------|----------|------------|----------|------------|----------|------------|---------------|-------------|------------|------------|-----------|
| A_55_P2021 | 75.8     | Detected   | 74.9     | Detected   | 67.1     | Detected   | 89.8     | Detected   | Sfi1          | 1.18469657  | 0.88522427 | 1.19893191 | 0.8958611 |
| A_51_P4146 | 186.4    | Detected   | 473      | Detected   | 114.3    | Detected   | 220.8    | Detected   | Plvap         | 1.184549356 | 0.61319742 | 0.46680761 | 0.241649  |
| A_55_P2044 | 81.3     | Detected   | 79.9     | Detected   | 77.4     | Detected   | 96.3     | Detected   | Gm10796       | 1.184501845 | 0.95202952 | 1.20525657 | 0.9687109 |
| A_55_P2044 | 51.5     | Detected   | 49.6     | Detected   | 66.1     | Detected   | 61       | Detected   | Mfng          | 1.184466019 | 1.28349515 | 1.22983871 | 1.3326613 |
| A_55_P2110 | 79493.7  | Detected   | 73584.7  | Detected   | 74096.1  | Detected   | 94151.3  | Detected   | Mettl7a2      | 1.184386939 | 0.93210028 | 1.2794956  | 1.0069498 |
| A_52_P3381 | 63603.1  | Detected   | 78914.6  | Detected   | 78643.8  | Detected   | 75328.1  | Detected   | Timm13        | 1.18434636  | 1.23647747 | 0.95455214 | 0.9965684 |
| A_55_P2171 | 205073.6 | Detected   | 226329.2 | Detected   | 251447.5 | Detected   | 242866   | Detected   | Lgals3        | 1.184287007 | 1.22613296 | 1.07306525 | 1.1109813 |
| A_52_P5823 | 3654.7   | Detected   | 4128.9   | Detected   | 4881.4   | Detected   | 4328.2   | Detected   | Mrps11        | 1.184283252 | 1.33564998 | 1.04826951 | 1.1822519 |
| A_55_P2030 | 997      | Detected   | 884.8    | Detected   | 1216.5   | Detected   | 1180.7   | Detected   | Tfpt          | 1.184252758 | 1.22016048 | 1.33442586 | 1.374887  |
| A_51_P4185 | 18665.6  | Detected   | 16323.4  | Detected   | 19854.2  | Detected   | 22103.1  | Detected   | Sfxn1         | 1.184162309 | 1.06367864 | 1.35407452 | 1.216303  |
| A_55_P2076 | 3605.8   | Detected   | 4297.4   | Detected   | 3497.9   | Detected   | 4269.8   | Detected   | Gm10144       | 1.184147762 | 0.97007599 | 0.99357751 | 0.8139573 |
| A_52_P2020 | 1894.2   | Detected   | 1477     | Detected   | 1429.3   | Detected   | 2242.9   | Detected   | Trak2         | 1.184088269 | 0.75456657 | 1.51855112 | 0.9677048 |
| A_55_P2118 | 278.2    | Detected   | 320.3    | Detected   | 287.4    | Detected   | 329.4    | Detected   | Cd37          | 1.184040259 | 1.03306973 | 1.02841086 | 0.8972838 |
| A_55_P1986 | 10555.9  | Detected   | 8425.9   | Detected   | 11568.2  | Detected   | 12498    | Detected   | Pih1d1        | 1.183982417 | 1.09589898 | 1.48328368 | 1.3729335 |
| A_51_P4360 | 14.7     | Not Detect | 22.4     | Detected   | 14.1     | Not Detect | 17.4     | Not Detect | Gpr182        | 1.183673469 | 0.95918367 | 0.77678571 | 0.6294643 |
| A_65_P1911 | 546.7    | Detected   | 526.7    | Detected   | 607.2    | Detected   | 647.1    | Detected   | Zfp397        | 1.183647339 | 1.11066398 | 1.22859313 | 1.1528384 |
| A_55_P2011 | 1894.5   | Detected   | 1533.7   | Detected   | 1759.8   | Detected   | 2242.2   | Detected   | Dlg1          | 1.183531275 | 0.92889945 | 1.46195475 | 1.1474213 |
| A_55_P2044 | 12923.5  | Detected   | 12022.8  | Detected   | 14062.9  | Detected   | 15294.9  | Detected   | Vps29         | 1.183495183 | 1.08816497 | 1.2721579  | 1.1696859 |
| A_55_P2164 | 10.9     | Not Detect | 14.6     | Not Detect | 22.2     | Detected   | 12.9     | Not Detect | Gsdmc4        | 1.183486239 | 2.03669725 | 0.88356164 | 1.5205479 |
| A_66_P1091 | 16777.5  | Detected   | 18933.1  | Detected   | 19279.5  | Detected   | 19855.6  | Detected   | Farsb         | 1.183465951 | 1.1491283  | 1.04872419 | 1.018296  |
| A_52_P3670 | 27520.5  | Detected   | 24485.2  | Detected   | 25193.7  | Detected   | 32569.3  | Detected   | Atxn2l        | 1.183455969 | 0.91545212 | 1.33016271 | 1.0289358 |
| A_55_P2079 | 1850.2   | Detected   | 2031.9   | Detected   | 1748.2   | Detected   | 2189.5   | Detected   | 4930579G24Rik | 1.18338558  | 0.94487082 | 1.07756287 | 0.860377  |
| A_55_P1961 | 215535.7 | Detected   | 263678.3 | Detected   | 252704.2 | Detected   | 255056.8 | Detected   | Gm6981        | 1.183362199 | 1.17244707 | 0.96730296 | 0.9583807 |
| A_51_P2305 | 246.1    | Detected   | 220.2    | Detected   | 214.2    | Detected   | 291.2    | Detected   | Rfng          | 1.183258838 | 0.8703779  | 1.32243415 | 0.972752  |
| A_55_P1975 | 983.7    | Detected   | 967.9    | Detected   | 882.2    | Detected   | 1163.9   | Detected   | Lrig2         | 1.183185931 | 0.89681814 | 1.20250026 | 0.9114578 |
| A_52_P5767 | 6778.3   | Detected   | 6386.6   | Detected   | 8561     | Detected   | 8019.3   | Detected   | Tmem30a       | 1.183084254 | 1.26300105 | 1.25564463 | 1.3404628 |
| A_55_P2153 | 380874.4 | Detected   | 401815.8 | Detected   | 368564.1 | Detected   | 450600.2 | Detected   | 2610028H24Rik | 1.183067699 | 0.96767885 | 1.12140986 | 0.9172464 |
| A_51_P4053 | 124      | Detected   | 119.6    | Detected   | 128      | Detected   | 146.7    | Detected   | Mepe          | 1.183064516 | 1.03225806 | 1.22658863 | 1.0702341 |
| A_55_P1997 | 591.6    | Detected   | 534      | Detected   | 489.1    | Detected   | 699.9    | Detected   | Kdm5c         | 1.18306288  | 0.82674104 | 1.31067416 | 0.9159176 |
| A_52_P3574 | 966.5    | Detected   | 1082.4   | Detected   | 1094.9   | Detected   | 1143.4   | Detected   | Frk           | 1.183031557 | 1.13285049 | 1.05635625 | 1.0115484 |
| A_52_P3567 | 1981.5   | Detected   | 1784.6   | Detected   | 2060.6   | Detected   | 2344     | Detected   | Pdzd8         | 1.182942215 | 1.03991925 | 1.3134596  | 1.1546565 |
| A_55_P2133 | 1759.6   | Detected   | 1746     | Detected   | 2083.7   | Detected   | 2081.5   | Detected   | Luc7l2        | 1.182939304 | 1.18418959 | 1.19215349 | 1.1934135 |
| A_51_P3208 | 62620.9  | Detected   | 95481.9  | Detected   | 73140.6  | Detected   | 74071.8  | Detected   | Cd9           | 1.182860674 | 1.16799024 | 0.77576797 | 0.7660153 |
| A_51_P1965 | 1054.7   | Detected   | 1293.3   | Detected   | 1463.7   | Detected   | 1247.5   | Detected   | Plekhlj1      | 1.182800796 | 1.387788   | 0.96458672 | 1.131756  |
| A_51_P4169 | 5821.4   | Detected   | 6988.7   | Detected   | 5719.8   | Detected   | 6885.4   | Detected   | Ube2j2        | 1.182773903 | 0.98254715 | 0.985219   | 0.8184355 |
| A_55_P2100 | 458.1    | Detected   | 549.7    | Detected   | 431      | Detected   | 541.8    | Detected   | Fsd1l         | 1.182711198 | 0.94084261 | 0.98562852 | 0.784064  |
| A_55_P2065 | 51834.2  | Detected   | 47271.1  | Detected   | 51566.2  | Detected   | 61304.7  | Detected   | Medag         | 1.182707556 | 0.99482967 | 1.29687483 | 1.090861  |
| A_55_P1973 | 5514.6   | Detected   | 5192.7   | Detected   | 6118.4   | Detected   | 6522.1   | Detected   | Rnf7          | 1.182696841 | 1.10949117 | 1.25601325 | 1.1782695 |
| A_66_P1271 | 3314.2   | Detected   | 4376.7   | Detected   | 2778.4   | Detected   | 3919.6   | Detected   | Eif2b3        | 1.182668517 | 0.83833203 | 0.89556058 | 0.6348162 |
| A_55_P2034 | 75384    | Detected   | 72414.9  | Detected   | 84139.7  | Detected   | 89152.1  | Detected   | Pdcd5         | 1.182639552 | 1.11614799 | 1.23112923 | 1.1619114 |

|            |          |          |          |          |          |          |          |          |               |             |            |            |           |
|------------|----------|----------|----------|----------|----------|----------|----------|----------|---------------|-------------|------------|------------|-----------|
| A_55_P2098 | 31567.4  | Detected | 31457.1  | Detected | 28596.9  | Detected | 37332.8  | Detected | Sf3a2         | 1.182637785 | 0.90589976 | 1.18678454 | 0.9090762 |
| A_52_P9260 | 399.2    | Detected | 417.4    | Detected | 390.8    | Detected | 472.1    | Detected | Fam149b       | 1.18261523  | 0.97895792 | 1.13104935 | 0.9362722 |
| A_55_P2026 | 4718.1   | Detected | 4397.8   | Detected | 5304.8   | Detected | 5579.5   | Detected | Vprbp         | 1.182573494 | 1.1243509  | 1.26870253 | 1.2062395 |
| A_55_P2031 | 2120.8   | Detected | 1883.8   | Detected | 2484.1   | Detected | 2508     | Detected | Rin2          | 1.182572614 | 1.17130328 | 1.33135152 | 1.3186644 |
| A_55_P2308 | 1899     | Detected | 2709.6   | Detected | 2052.9   | Detected | 2245.1   | Detected | Gm16062       | 1.182253818 | 1.08104265 | 0.82857248 | 0.7576395 |
| A_51_P5184 | 81472.1  | Detected | 69050    | Detected | 86508.1  | Detected | 96318.6  | Detected | Atpif1        | 1.182228027 | 1.06181257 | 1.39491093 | 1.2528327 |
| A_52_P1003 | 487.7    | Detected | 393.1    | Detected | 552.2    | Detected | 576.5    | Detected | Zbtb42        | 1.182079147 | 1.13225343 | 1.46654795 | 1.4047316 |
| A_51_P3155 | 245274.5 | Detected | 266614   | Detected | 239400.1 | Detected | 289927.8 | Detected | CYTB          | 1.182054392 | 0.97604969 | 1.08744402 | 0.8979277 |
| A_55_P2030 | 3042.9   | Detected | 2782     | Detected | 3472.2   | Detected | 3596.8   | Detected | Tfpt          | 1.1820303   | 1.14108252 | 1.29288282 | 1.2480949 |
| A_52_P4783 | 45.6     | Detected | 56.7     | Detected | 52.4     | Detected | 53.9     | Detected | Shprh         | 1.182017544 | 1.14912281 | 0.95061728 | 0.9241623 |
| A_52_P1632 | 814.4    | Detected | 827.8    | Detected | 990.3    | Detected | 962.6    | Detected | Tmem106b      | 1.18197446  | 1.21598723 | 1.16284127 | 1.1963035 |
| A_66_P1128 | 3724.3   | Detected | 2972.4   | Detected | 4779.1   | Detected | 4401.9   | Detected | B4galt6       | 1.18194023  | 1.28322101 | 1.48092451 | 1.6078253 |
| A_55_P2012 | 993.3    | Detected | 652.7    | Detected | 888.8    | Detected | 1174     | Detected | Arid4b        | 1.181918856 | 0.89479513 | 1.7986824  | 1.3617282 |
| A_52_P4758 | 448.1    | Detected | 440.4    | Detected | 433.9    | Detected | 529.6    | Detected | Rc3h1         | 1.181879045 | 0.96831064 | 1.20254314 | 0.9852407 |
| A_55_P2078 | 236749.9 | Detected | 251192.6 | Detected | 232849.9 | Detected | 279800.3 | Detected | Lrrc31        | 1.181839148 | 0.98352692 | 1.11388751 | 0.9269775 |
| A_55_P2028 | 123.2    | Detected | 145      | Detected | 156      | Detected | 145.6    | Detected | Isg2012       | 1.181818182 | 1.26623377 | 1.00413793 | 1.0758621 |
| A_52_P3460 | 771.8    | Detected | 817.3    | Detected | 796.2    | Detected | 912.1    | Detected | Trmt11        | 1.181782845 | 1.03161441 | 1.11599168 | 0.9741833 |
| A_51_P4910 | 10365.7  | Detected | 13415    | Detected | 12377.6  | Detected | 12249.9  | Detected | Ints9         | 1.181772577 | 1.19409205 | 0.91314946 | 0.9226687 |
| A_66_P1320 | 444.6    | Detected | 439.3    | Detected | 432.8    | Detected | 525.4    | Detected | Gm5608        | 1.181736392 | 0.97345929 | 1.19599363 | 0.9852037 |
| A_55_P2413 | 106.8    | Detected | 90.4     | Detected | 69.5     | Detected | 126.2    | Detected | 1700048M11Rik | 1.18164794  | 0.65074906 | 1.3960177  | 0.7688053 |
| A_55_P2071 | 49       | Detected | 47.4     | Detected | 47.3     | Detected | 57.9     | Detected | Anapc1        | 1.181632653 | 0.96530612 | 1.22151899 | 0.9978903 |
| A_55_P1980 | 174955.7 | Detected | 183368.3 | Detected | 190933.8 | Detected | 206722.7 | Detected | Gm6548        | 1.181571678 | 1.09132655 | 1.12736334 | 1.0412585 |
| A_65_P1295 | 262.9    | Detected | 194.6    | Detected | 246.9    | Detected | 310.6    | Detected | Sec16a        | 1.181437809 | 0.93914036 | 1.59609455 | 1.2687564 |
| A_66_P1366 | 1642.2   | Detected | 934.6    | Detected | 1787     | Detected | 1940.1   | Detected | Chp1          | 1.181402996 | 1.0881744  | 2.07586133 | 1.9120479 |
| A_51_P4739 | 1413.2   | Detected | 1521.5   | Detected | 1385.2   | Detected | 1669.4   | Detected | Mycbp2        | 1.181290688 | 0.98018681 | 1.0972067  | 0.9104174 |
| A_55_P2007 | 42.5     | Detected | 29.3     | Detected | 25.2     | Detected | 50.2     | Detected | Muc5b         | 1.181176471 | 0.59294118 | 1.71331058 | 0.8600683 |
| A_66_P1074 | 94.5     | Detected | 93.4     | Detected | 86.2     | Detected | 111.6    | Detected | Trbv13-1      | 1.180952381 | 0.91216931 | 1.19486081 | 0.9229122 |
| A_55_P1986 | 1255     | Detected | 1271.2   | Detected | 1708.6   | Detected | 1482     | Detected | Tut1          | 1.180876494 | 1.36143426 | 1.16582756 | 1.3440843 |
| A_51_P3283 | 2590.9   | Detected | 2095.8   | Detected | 3569.5   | Detected | 3059.5   | Detected | Pdia4         | 1.180863793 | 1.37770659 | 1.45982441 | 1.7031682 |
| A_55_P2090 | 7600.7   | Detected | 9853.8   | Detected | 5688.5   | Detected | 8974.6   | Detected | H13           | 1.180759667 | 0.74841791 | 0.91077554 | 0.57729   |
| A_55_P2192 | 629.6    | Detected | 574      | Detected | 909.8    | Detected | 743.4    | Detected | Slmap         | 1.180749682 | 1.44504447 | 1.29512195 | 1.5850174 |
| A_55_P2027 | 109      | Detected | 93.2     | Detected | 96.1     | Detected | 128.7    | Detected | Neto1         | 1.180733945 | 0.88165138 | 1.38090129 | 1.0311159 |
| A_52_P1449 | 5007.6   | Detected | 6497.5   | Detected | 6352.1   | Detected | 5912.6   | Detected | Taf1d         | 1.180725298 | 1.26849189 | 0.90998076 | 0.9776222 |
| A_55_P2069 | 1286.5   | Detected | 876.9    | Detected | 886.2    | Detected | 1518.9   | Detected | Zmym6         | 1.180645161 | 0.68884571 | 1.73212453 | 1.0106055 |
| A_55_P2162 | 2261.9   | Detected | 2104.9   | Detected | 2746.7   | Detected | 2670.3   | Detected | Nipa2         | 1.18055617  | 1.21433308 | 1.26861134 | 1.3049076 |
| A_55_P2342 | 82.1     | Detected | 78.2     | Detected | 69.9     | Detected | 96.9     | Detected | 2610008G14Rik | 1.180267966 | 0.85140073 | 1.23913043 | 0.8938619 |
| A_52_P6792 | 3250     | Detected | 2756.4   | Detected | 2794.1   | Detected | 3835     | Detected | Slc35f6       | 1.18        | 0.85972308 | 1.3913075  | 1.0136773 |
| A_51_P2723 | 90       | Detected | 94.9     | Detected | 128.4    | Detected | 106.2    | Detected | Ankrd33       | 1.18        | 1.42666667 | 1.11907271 | 1.3530032 |
| A_51_P3871 | 246.2    | Detected | 208      | Detected | 104      | Detected | 290.5    | Detected | Oasl2         | 1.179935012 | 0.4224208  | 1.39663462 | 0.5       |
| A_55_P1955 | 3878     | Detected | 5229.9   | Detected | 4149.1   | Detected | 4575.2   | Detected | Extl2         | 1.179783394 | 1.06990717 | 0.87481596 | 0.7933421 |

|            |          |            |          |            |          |            |          |            |               |             |            |            |           |
|------------|----------|------------|----------|------------|----------|------------|----------|------------|---------------|-------------|------------|------------|-----------|
| A_55_P2137 | 170048.8 | Detected   | 185146.3 | Detected   | 209713.3 | Detected   | 200615.9 | Detected   | Rps25         | 1.17975487  | 1.23325363 | 1.08355338 | 1.1326897 |
| A_55_P1975 | 12.8     | Not Detect | 9.7      | Not Detect | 17.9     | Detected   | 15.1     | Not Detect | Amt           | 1.1796875   | 1.3984375  | 1.55670103 | 1.8453608 |
| A_51_P1984 | 12107.3  | Detected   | 11164.6  | Detected   | 11823.8  | Detected   | 14282.4  | Detected   | Grb2          | 1.179651946 | 0.97658437 | 1.27925765 | 1.0590438 |
| A_51_P1656 | 18961.8  | Detected   | 14710.9  | Detected   | 19926.9  | Detected   | 22368.1  | Detected   | Hirip3        | 1.179640119 | 1.05089707 | 1.520512   | 1.354567  |
| A_51_P1335 | 6648.8   | Detected   | 5602.9   | Detected   | 4898.6   | Detected   | 7842.5   | Detected   | Cbx4          | 1.179536157 | 0.73676453 | 1.39972157 | 0.8742972 |
| A_55_P2114 | 1709.3   | Detected   | 1560.5   | Detected   | 1464.3   | Detected   | 2016.1   | Detected   | Irf9          | 1.17948868  | 0.85666647 | 1.29195771 | 0.9383531 |
| A_55_P2009 | 318933.9 | Detected   | 363182.5 | Detected   | 327117.3 | Detected   | 376161.4 | Detected   | Rpl13         | 1.179433732 | 1.02565861 | 1.03573658 | 0.9006968 |
| A_55_P2247 | 12981.2  | Detected   | 11084.6  | Detected   | 14008.1  | Detected   | 15309.7  | Detected   | Ap2s1         | 1.179374788 | 1.07910671 | 1.38116847 | 1.2637443 |
| A_55_P2251 | 403.8    | Detected   | 304.6    | Detected   | 463.5    | Detected   | 476.2    | Detected   | Qk            | 1.179296682 | 1.14784547 | 1.56336179 | 1.5216678 |
| A_51_P2538 | 106      | Detected   | 59.2     | Detected   | 278.7    | Detected   | 125      | Detected   | Psca          | 1.179245283 | 2.62924528 | 2.11148649 | 4.7077703 |
| A_55_P2082 | 46966.8  | Detected   | 57086.6  | Detected   | 41748.3  | Detected   | 55382.8  | Detected   | Hmgb1         | 1.179190407 | 0.8888896  | 0.97015412 | 0.7313152 |
| A_55_P1979 | 222.2    | Detected   | 238.1    | Detected   | 231.4    | Detected   | 262      | Detected   | Tbata         | 1.179117912 | 1.04140414 | 1.10037799 | 0.9718606 |
| A_55_P2109 | 23041.2  | Detected   | 20105.4  | Detected   | 22109.3  | Detected   | 27166.9  | Detected   | Rfng          | 1.179057514 | 0.95955506 | 1.35122405 | 1.0996697 |
| A_55_P2010 | 5295.5   | Detected   | 4642.8   | Detected   | 4840.2   | Detected   | 6243.1   | Detected   | Slc30a5       | 1.178944387 | 0.91402134 | 1.34468424 | 1.0425174 |
| A_55_P2102 | 21.8     | Detected   | 18       | Detected   | 13.3     | Not Detect | 25.7     | Not Detect | Armc9         | 1.178899083 | 0.61009174 | 1.42777778 | 0.7388889 |
| A_55_P2151 | 21.8     | Detected   | 24.1     | Detected   | 32.4     | Detected   | 25.7     | Not Detect | Krtap16-1     | 1.178899083 | 1.48623853 | 1.06639004 | 1.3443983 |
| A_52_P5549 | 3865.4   | Detected   | 4452.2   | Detected   | 3368     | Detected   | 4556.8   | Detected   | Fam133b       | 1.17886894  | 0.87131992 | 1.023494   | 0.7564799 |
| A_52_P1083 | 4151.3   | Detected   | 6122.2   | Detected   | 4246.1   | Detected   | 4893.6   | Detected   | Myc           | 1.178811457 | 1.02283622 | 0.79932051 | 0.6935579 |
| A_55_P2130 | 81.1     | Detected   | 81.8     | Detected   | 96.3     | Detected   | 95.6     | Detected   | Gm4200        | 1.178791615 | 1.18742293 | 1.16870416 | 1.1772616 |
| A_55_P2000 | 20185.7  | Detected   | 17629.1  | Detected   | 15417    | Detected   | 23793.9  | Detected   | Ubp2          | 1.178750303 | 0.7637585  | 1.34969454 | 0.87452   |
| A_55_P2447 | 658.1    | Detected   | 714.2    | Detected   | 733.5    | Detected   | 775.7    | Detected   | Asxl2         | 1.178696247 | 1.11457225 | 1.08611033 | 1.0270232 |
| A_66_P1369 | 267.5    | Detected   | 307.9    | Detected   | 274.5    | Detected   | 315.3    | Detected   | Klk1b21       | 1.178691589 | 1.02616822 | 1.02403378 | 0.8915232 |
| A_55_P2150 | 4810.5   | Detected   | 5585.2   | Detected   | 6065.5   | Detected   | 5670     | Detected   | Yipf5         | 1.178671656 | 1.26088764 | 1.01518298 | 1.0859951 |
| A_51_P2780 | 22150.2  | Detected   | 24779.6  | Detected   | 20927.2  | Detected   | 26107.6  | Detected   | Vps36         | 1.178662044 | 0.94478605 | 1.05359247 | 0.8445334 |
| A_55_P2176 | 16.8     | Detected   | 8.8      | Not Detect | 17.2     | Detected   | 19.8     | Not Detect | Gucy2e        | 1.178571429 | 1.02380952 | 2.25       | 1.9545455 |
| A_55_P2182 | 29.7     | Detected   | 23.3     | Detected   | 29.5     | Detected   | 35       | Not Detect | Adig          | 1.178451178 | 0.99326599 | 1.50214592 | 1.2660944 |
| A_55_P2121 | 10273.4  | Detected   | 11012.5  | Detected   | 12204.1  | Detected   | 12106.3  | Detected   | Clcc1         | 1.17841221  | 1.18793194 | 1.0993235  | 1.1082043 |
| A_55_P2141 | 17302.1  | Detected   | 14707.9  | Detected   | 13616.8  | Detected   | 20383.7  | Detected   | Pls3          | 1.178105548 | 0.78700273 | 1.38590145 | 0.9258154 |
| A_66_P1190 | 26.4     | Detected   | 25.9     | Detected   | 38.6     | Detected   | 31.1     | Not Detect | Zfp870        | 1.178030303 | 1.46212121 | 1.2007722  | 1.4903475 |
| A_55_P2049 | 2983.7   | Detected   | 3419.7   | Detected   | 1979.7   | Detected   | 3514.8   | Detected   | Phtf2         | 1.178000469 | 0.66350504 | 1.02780946 | 0.5789104 |
| A_55_P2056 | 5626.9   | Detected   | 5789.8   | Detected   | 5593.7   | Detected   | 6628.4   | Detected   | Lrrk1         | 1.177984325 | 0.99409977 | 1.14484093 | 0.9661301 |
| A_55_P2000 | 427.9    | Detected   | 483.7    | Detected   | 426.9    | Detected   | 504      | Detected   | 9930104L06Rik | 1.177845291 | 0.99766301 | 1.04196816 | 0.8825718 |
| A_52_P2176 | 2625.8   | Detected   | 3076.1   | Detected   | 1985.5   | Detected   | 3092.6   | Detected   | Zfp692        | 1.177774393 | 0.75615051 | 1.00536393 | 0.6454602 |
| A_55_P2083 | 205.9    | Detected   | 302.6    | Detected   | 156.9    | Detected   | 242.5    | Detected   | Gm10272       | 1.177756192 | 0.7620204  | 0.80138797 | 0.5185063 |
| A_52_P1647 | 7121.1   | Detected   | 5714.4   | Detected   | 7968.7   | Detected   | 8386.7   | Detected   | Poc1a         | 1.177725351 | 1.11902655 | 1.46764315 | 1.3944946 |
| A_51_P5067 | 5531.5   | Detected   | 8821     | Detected   | 6031.2   | Detected   | 6514.5   | Detected   | Nap1l1        | 1.177709482 | 1.09033716 | 0.73852171 | 0.683732  |
| A_52_P6721 | 68.1     | Detected   | 73.7     | Detected   | 62.8     | Detected   | 80.2     | Detected   | 2900052N01Rik | 1.177679883 | 0.92217327 | 1.08819539 | 0.8521031 |
| A_55_P2148 | 2136.6   | Detected   | 2620.6   | Detected   | 2552.5   | Detected   | 2516.2   | Detected   | Nr1d2         | 1.17766545  | 1.19465506 | 0.9601618  | 0.9740136 |
| A_55_P1971 | 3398.5   | Detected   | 3714.9   | Detected   | 3874.6   | Detected   | 4002.2   | Detected   | Dnajc8        | 1.177637193 | 1.14009122 | 1.07733721 | 1.042989  |
| A_65_P1171 | 1487.1   | Detected   | 1632.6   | Detected   | 1308.2   | Detected   | 1751.2   | Detected   | Nol8          | 1.177593975 | 0.87969874 | 1.07264486 | 0.8012985 |



|            |          |          |         |            |          |          |          |            |               |             |            |            |           |
|------------|----------|----------|---------|------------|----------|----------|----------|------------|---------------|-------------|------------|------------|-----------|
| A_51_P1871 | 7975     | Detected | 7757.4  | Detected   | 8413.1   | Detected | 9390.6   | Detected   | Smim12        | 1.177504702 | 1.05493417 | 1.21053446 | 1.0845257 |
| A_52_P1733 | 3071.2   | Detected | 3340.2  | Detected   | 2970.2   | Detected | 3616.3   | Detected   | Gm21559       | 1.177487627 | 0.96711383 | 1.08265972 | 0.8892282 |
| A_55_P1990 | 75011.5  | Detected | 64675.4 | Detected   | 85815.4  | Detected | 88320.7  | Detected   | Scsep1        | 1.177428794 | 1.14402992 | 1.36559959 | 1.3268631 |
| A_55_P2169 | 104079.2 | Detected | 97351   | Detected   | 101529.2 | Detected | 122545.5 | Detected   | Prorsd1       | 1.177425461 | 0.97549943 | 1.25880063 | 1.0429189 |
| A_51_P3417 | 34.4     | Detected | 34      | Detected   | 38.1     | Detected | 40.5     | Not Detect | Mpl           | 1.177325581 | 1.10755814 | 1.19117647 | 1.1205882 |
| A_52_P4555 | 1710.5   | Detected | 2114.7  | Detected   | 1500.8   | Detected | 2013.8   | Detected   | Ric8b         | 1.177316574 | 0.87740427 | 0.95228638 | 0.7096988 |
| A_55_P2360 | 51.9     | Detected | 45.6    | Detected   | 38.7     | Detected | 61.1     | Detected   | D5Ertd798e    | 1.177263969 | 0.74566474 | 1.33991228 | 0.8486842 |
| A_55_P2141 | 53180.5  | Detected | 54541.2 | Detected   | 60426.7  | Detected | 62598.7  | Detected   | Park7         | 1.177098749 | 1.13625671 | 1.14773236 | 1.1079093 |
| A_52_P5610 | 2336.4   | Detected | 3140.2  | Detected   | 2788.5   | Detected | 2750.1   | Detected   | Slc25a32      | 1.177067283 | 1.19350282 | 0.87577224 | 0.8880008 |
| A_51_P1446 | 41.8     | Detected | 50.2    | Detected   | 54.3     | Detected | 49.2     | Detected   | Sit1          | 1.177033493 | 1.29904306 | 0.98007968 | 1.0816733 |
| A_55_P2173 | 22193    | Detected | 27510.7 | Detected   | 30061.8  | Detected | 26121.5  | Detected   | Mpp6          | 1.177015275 | 1.35456225 | 0.94950328 | 1.0927312 |
| A_55_P2176 | 5744.6   | Detected | 5216.6  | Detected   | 5845.5   | Detected | 6761.4   | Detected   | 0610010F05Rik | 1.17700101  | 1.01756432 | 1.29613158 | 1.1205575 |
| A_55_P2103 | 59.9     | Detected | 59.9    | Detected   | 71.3     | Detected | 70.5     | Detected   | Mknk2         | 1.176961603 | 1.1903172  | 1.1769616  | 1.1903172 |
| A_55_P2043 | 110.2    | Detected | 123.7   | Detected   | 119.3    | Detected | 129.7    | Detected   | Mtm1          | 1.176950998 | 1.08257713 | 1.04850445 | 0.9644301 |
| A_51_P5113 | 7100.9   | Detected | 8684.8  | Detected   | 7414.4   | Detected | 8357.4   | Detected   | Ranbp2        | 1.176949401 | 1.04414933 | 0.96230195 | 0.8537214 |
| A_55_P1979 | 10728.9  | Detected | 6889.5  | Detected   | 14200.9  | Detected | 12627.3  | Detected   | Shc1          | 1.17694265  | 1.32361193 | 1.83283257 | 2.0612381 |
| A_52_P4964 | 52       | Detected | 93.3    | Detected   | 27.1     | Detected | 61.2     | Detected   | 1700001O22Rik | 1.176923077 | 0.52115385 | 0.65594855 | 0.2904609 |
| A_52_P2607 | 114.2    | Detected | 84.6    | Detected   | 106.9    | Detected | 134.4    | Detected   | Dopey1        | 1.176882662 | 0.93607706 | 1.58865248 | 1.2635934 |
| A_55_P1952 | 1311.2   | Detected | 994.9   | Detected   | 1210.7   | Detected | 1543.1   | Detected   | Son           | 1.176860891 | 0.92335265 | 1.55101015 | 1.2169062 |
| A_55_P1965 | 329.8    | Detected | 234.7   | Detected   | 268.7    | Detected | 388.1    | Detected   | Zfp329        | 1.176773802 | 0.8147362  | 1.65360034 | 1.1448658 |
| A_55_P2025 | 290.9    | Detected | 244.6   | Detected   | 301.5    | Detected | 342.3    | Detected   | Gnaz          | 1.176693022 | 1.03643864 | 1.39942764 | 1.2326247 |
| A_66_P1075 | 4698.6   | Detected | 4932    | Detected   | 4754.8   | Detected | 5528.8   | Detected   | Taf2          | 1.176690929 | 1.01196101 | 1.12100568 | 0.9640714 |
| A_51_P3588 | 183.4    | Detected | 190     | Detected   | 161.1    | Detected | 215.8    | Detected   | Disc1         | 1.176663032 | 0.87840785 | 1.13578947 | 0.8478947 |
| A_51_P3498 | 78801.7  | Detected | 79647.6 | Detected   | 81100.7  | Detected | 92722    | Detected   | Txndc17       | 1.176649742 | 1.0291745  | 1.16415309 | 1.0182441 |
| A_55_P2060 | 173.8    | Detected | 226.3   | Detected   | 236.1    | Detected | 204.5    | Detected   | S100a5        | 1.176639816 | 1.358458   | 0.9036677  | 1.0433053 |
| A_55_P2047 | 1125.6   | Detected | 1068.5  | Detected   | 947.1    | Detected | 1324.3   | Detected   | Srr           | 1.176528074 | 0.84141791 | 1.23940103 | 0.8863828 |
| A_51_P3292 | 3071     | Detected | 2429.7  | Detected   | 2391.7   | Detected | 3612.9   | Detected   | Senp5         | 1.17645718  | 0.77880169 | 1.4869737  | 0.9843602 |
| A_51_P4552 | 923.5    | Detected | 801.5   | Detected   | 1213.8   | Detected | 1086.3   | Detected   | Ring1         | 1.176285869 | 1.31434759 | 1.35533375 | 1.5144105 |
| A_51_P3755 | 1873.1   | Detected | 2259.4  | Detected   | 1771.6   | Detected | 2203.2   | Detected   | Polr3b        | 1.176231915 | 0.94581176 | 0.97512614 | 0.784102  |
| A_51_P4084 | 71578.2  | Detected | 56333.4 | Detected   | 86065.8  | Detected | 84190.1  | Detected   | Cdipt         | 1.176197501 | 1.20240241 | 1.49449705 | 1.5277935 |
| A_55_P1996 | 19603.2  | Detected | 26415.2 | Detected   | 22932.4  | Detected | 23057.1  | Detected   | Polr2k        | 1.176190622 | 1.16982942 | 0.87287244 | 0.8681517 |
| A_66_P1206 | 17.6     | Detected | 12.6    | Not Detect | 18.3     | Detected | 20.7     | Not Detect | 4930544D05Rik | 1.176136364 | 1.03977273 | 1.64285714 | 1.452381  |
| A_51_P3929 | 25195.7  | Detected | 30494.3 | Detected   | 29792.5  | Detected | 29632.4  | Detected   | Mthfd1        | 1.176089571 | 1.18244383 | 0.9717357  | 0.9769859 |
| A_55_P2000 | 332.8    | Detected | 223.1   | Detected   | 312.5    | Detected | 391.4    | Detected   | Fmnl2         | 1.176081731 | 0.9390024  | 1.75437024 | 1.4007172 |
| A_55_P1958 | 8741.6   | Detected | 6688.6  | Detected   | 12308.2  | Detected | 10280    | Detected   | Arrdc1        | 1.17598609  | 1.40800311 | 1.53694346 | 1.8401758 |
| A_52_P4711 | 2797.7   | Detected | 2682.4  | Detected   | 2274.5   | Detected | 3289.7   | Detected   | Pusl1         | 1.175858741 | 0.81298924 | 1.22640173 | 0.8479347 |
| A_51_P2190 | 1208.3   | Detected | 1480.2  | Detected   | 1311.6   | Detected | 1420.7   | Detected   | Oxa1l         | 1.17578416  | 1.08549201 | 0.95980273 | 0.8860965 |
| A_55_P2186 | 13739.5  | Detected | 14842.6 | Detected   | 14608.7  | Detected | 16153    | Detected   | Chtop         | 1.175661414 | 1.06326286 | 1.08828642 | 0.9842413 |
| A_52_P2613 | 1579.3   | Detected | 878.5   | Detected   | 1280.4   | Detected | 1856.7   | Detected   | Tanc1         | 1.175647439 | 0.81073893 | 2.1134889  | 1.4574843 |
| A_55_P2131 | 7640.8   | Detected | 6720.5  | Detected   | 5662.2   | Detected | 8982.7   | Detected   | Krtap10-10    | 1.175622971 | 0.74104806 | 1.33661186 | 0.8425266 |

|            |          |          |          |          |          |            |          |            |               |             |            |            |           |
|------------|----------|----------|----------|----------|----------|------------|----------|------------|---------------|-------------|------------|------------|-----------|
| A_51_P3620 | 460.1    | Detected | 574.2    | Detected | 473.9    | Detected   | 540.9    | Detected   | Rexo1         | 1.175613997 | 1.02999348 | 0.94200627 | 0.8253222 |
| A_52_P9953 | 3280.8   | Detected | 3382.9   | Detected | 3911.1   | Detected   | 3856.8   | Detected   | Ippk          | 1.175566935 | 1.19211778 | 1.14008691 | 1.1561382 |
| A_55_P2033 | 15721.8  | Detected | 12671.5  | Detected | 12761.9  | Detected   | 18481.5  | Detected   | Sltm          | 1.175533336 | 0.81173275 | 1.45850925 | 1.0071341 |
| A_55_P2135 | 1628.1   | Detected | 1395.4   | Detected | 1926.4   | Detected   | 1913.6   | Detected   | Taf6l         | 1.175357779 | 1.1832197  | 1.37136305 | 1.380536  |
| A_51_P4820 | 1611.1   | Detected | 1101.1   | Detected | 2104     | Detected   | 1893.6   | Detected   | Epm2aip1      | 1.175346037 | 1.30594004 | 1.71973481 | 1.9108165 |
| A_51_P3710 | 3767.9   | Detected | 6450.6   | Detected | 4744.2   | Detected   | 4428.5   | Detected   | Glipr1        | 1.175323124 | 1.25910985 | 0.68652528 | 0.7354665 |
| A_52_P5902 | 1958.8   | Detected | 1240.1   | Detected | 2727.1   | Detected   | 2302.1   | Detected   | Vars2         | 1.175260363 | 1.39222994 | 1.85638255 | 2.1990968 |
| A_51_P3721 | 124.4    | Detected | 109.2    | Detected | 121.7    | Detected   | 146.2    | Detected   | 4930563E22Rik | 1.175241158 | 0.97829582 | 1.33882784 | 1.1144689 |
| A_55_P2046 | 110.8    | Detected | 101.9    | Detected | 115.9    | Detected   | 130.2    | Detected   | Mpped1        | 1.175090253 | 1.04602888 | 1.27772326 | 1.1373896 |
| A_51_P2339 | 3077.3   | Detected | 3051.9   | Detected | 2948     | Detected   | 3616.1   | Detected   | B4galnt1      | 1.175088552 | 0.95798265 | 1.18486844 | 0.9659556 |
| A_55_P2130 | 921.1    | Detected | 956.8    | Detected | 855.8    | Detected   | 1082.3   | Detected   | Ube2g2        | 1.175008142 | 0.9291065  | 1.13116639 | 0.8944398 |
| A_51_P3410 | 10655.1  | Detected | 10101.4  | Detected | 13904.5  | Detected   | 12518.5  | Detected   | Eif3k         | 1.174883389 | 1.30496194 | 1.23928366 | 1.3764924 |
| A_55_P2051 | 49.2     | Detected | 64.8     | Detected | 56.9     | Detected   | 57.8     | Detected   | Lbx1          | 1.174796748 | 1.15650407 | 0.89197531 | 0.8780864 |
| A_55_P2114 | 3370.7   | Detected | 3975.9   | Detected | 3357.8   | Detected   | 3959.7   | Detected   | Exosc10       | 1.174741152 | 0.9961729  | 0.99592545 | 0.8445383 |
| A_52_P5063 | 16.6     | Detected | 23.8     | Detected | 4.8      | Not Detect | 19.5     | Not Detect | Fbxo8         | 1.174698795 | 0.28915663 | 0.81932773 | 0.2016807 |
| A_55_P2031 | 14076.6  | Detected | 14203.2  | Detected | 11028.2  | Detected   | 16534.9  | Detected   | Plekhh3       | 1.174637341 | 0.78344202 | 1.16416723 | 0.7764588 |
| A_51_P3078 | 211.3    | Detected | 215.8    | Detected | 208.6    | Detected   | 248.2    | Detected   | 1700019N19Rik | 1.174633223 | 0.98722196 | 1.15013902 | 0.9666358 |
| A_55_P2166 | 4952.5   | Detected | 5055.6   | Detected | 6629.1   | Detected   | 5817.3   | Detected   | 1700011J10Rik | 1.174618879 | 1.33853609 | 1.15066461 | 1.311239  |
| A_55_P2084 | 1818.9   | Detected | 2290.7   | Detected | 2120.3   | Detected   | 2136.4   | Detected   | Dus4l         | 1.17455605  | 1.16570455 | 0.93264068 | 0.9256123 |
| A_55_P2121 | 940.4    | Detected | 1136.5   | Detected | 814.9    | Detected   | 1104.5   | Detected   | Nipbl         | 1.174500213 | 0.86654615 | 0.97184338 | 0.717026  |
| A_52_P3982 | 43       | Detected | 30.6     | Detected | 3.6      | Not Detect | 50.5     | Not Detect | Ddx26b        | 1.174418605 | 0.08372093 | 1.6503268  | 0.1176471 |
| A_55_P2130 | 43       | Detected | 38.3     | Detected | 34.5     | Detected   | 50.5     | Detected   | 6530409C15Rik | 1.174418605 | 0.80232558 | 1.31853786 | 0.9007833 |
| A_51_P4852 | 3544.6   | Detected | 4177.7   | Detected | 3078.2   | Detected   | 4162.7   | Detected   | Rgl1          | 1.174377927 | 0.86841957 | 0.99640951 | 0.7368169 |
| A_55_P2337 | 2915.7   | Detected | 3042.6   | Detected | 3279.6   | Detected   | 3424.1   | Detected   | BC003331      | 1.174366361 | 1.12480708 | 1.12538618 | 1.0778939 |
| A_51_P3426 | 159455.6 | Detected | 165942.3 | Detected | 180777.8 | Detected   | 187249.3 | Detected   | Pgam1         | 1.174303693 | 1.13371873 | 1.12840005 | 1.0894016 |
| A_55_P2142 | 361.2    | Detected | 188.8    | Detected | 77.1     | Detected   | 424.1    | Detected   | Spry3         | 1.17414175  | 0.21345515 | 2.24629237 | 0.4083686 |
| A_52_P6724 | 13846    | Detected | 16621.4  | Detected | 14965.6  | Detected   | 16255.5  | Detected   | Prpf3         | 1.174021378 | 1.0808609  | 0.97798621 | 0.9003814 |
| A_52_P3595 | 6919.1   | Detected | 9587.1   | Detected | 11009.5  | Detected   | 8123     | Detected   | Pdxk          | 1.173996618 | 1.59117515 | 0.84728437 | 1.148366  |
| A_55_P1987 | 159471.6 | Detected | 163984.5 | Detected | 131226.7 | Detected   | 187212.4 | Detected   | Gnb2          | 1.173954485 | 0.82288445 | 1.14164692 | 0.8002384 |
| A_55_P2207 | 125.9    | Detected | 132.5    | Detected | 119.4    | Detected   | 147.8    | Detected   | Slc30a7       | 1.173947577 | 0.94837172 | 1.1154717  | 0.9011321 |
| A_51_P1342 | 4374.2   | Detected | 3204.1   | Detected | 4394.6   | Detected   | 5134.9   | Detected   | 1700052K11Rik | 1.173906086 | 1.00466371 | 1.60260292 | 1.3715552 |
| A_52_P4877 | 3724.8   | Detected | 3132.2   | Detected | 4379.1   | Detected   | 4372.4   | Detected   | Copg2         | 1.173861684 | 1.17566044 | 1.39595173 | 1.3980908 |
| A_52_P3109 | 16952    | Detected | 21668.8  | Detected | 18818.5  | Detected   | 19899.2  | Detected   | Eif4e         | 1.173855592 | 1.110105   | 0.91833419 | 0.8684606 |
| A_51_P2727 | 70.2     | Detected | 71.7     | Detected | 50.6     | Detected   | 82.4     | Detected   | Gm7968        | 1.173789174 | 0.72079772 | 1.14923291 | 0.7057183 |
| A_51_P5173 | 17287.8  | Detected | 21245.5  | Detected | 17100.2  | Detected   | 20291.8  | Detected   | Cers2         | 1.173764157 | 0.98914842 | 0.95511049 | 0.8048857 |
| A_52_P6278 | 197.4    | Detected | 242.3    | Detected | 263.5    | Detected   | 231.7    | Detected   | Tgm1          | 1.173758865 | 1.33485309 | 0.95625258 | 1.0874948 |
| A_55_P2030 | 323.5    | Detected | 284      | Detected | 389.2    | Detected   | 379.7    | Detected   | Barx2         | 1.173724884 | 1.20309119 | 1.33697183 | 1.3704225 |
| A_51_P1429 | 957.4    | Detected | 818      | Detected | 1105.4   | Detected   | 1123.6   | Detected   | Zfp429        | 1.173595154 | 1.15458534 | 1.37359413 | 1.3513447 |
| A_66_P1197 | 214.3    | Detected | 249.2    | Detected | 261.3    | Detected   | 251.5    | Detected   | BC049265      | 1.173588427 | 1.21931871 | 1.00922953 | 1.0485554 |
| A_66_P1307 | 49       | Detected | 52.9     | Detected | 40.8     | Detected   | 57.5     | Detected   | Zfp963        | 1.173469388 | 0.83265306 | 1.08695652 | 0.7712665 |

|            |          |          |          |            |          |            |          |            |               |             |            |            |           |
|------------|----------|----------|----------|------------|----------|------------|----------|------------|---------------|-------------|------------|------------|-----------|
| A_52_P4178 | 957.2    | Detected | 1387.4   | Detected   | 696.6    | Detected   | 1123.2   | Detected   | Osgin2        | 1.173422482 | 0.7277476  | 0.80957186 | 0.5020902 |
| A_55_P2135 | 335.1    | Detected | 400.4    | Detected   | 374.6    | Detected   | 393.2    | Detected   | Prss36        | 1.17338108  | 1.11787526 | 0.98201798 | 0.9355644 |
| A_51_P4864 | 234.2    | Detected | 255.4    | Detected   | 212.3    | Detected   | 274.8    | Detected   | A530017D24Rik | 1.173356106 | 0.90649018 | 1.07595928 | 0.8312451 |
| A_51_P4774 | 11288.8  | Detected | 9439.3   | Detected   | 10762.3  | Detected   | 13244.9  | Detected   | Nfic          | 1.173277939 | 0.95336085 | 1.40316549 | 1.1401587 |
| A_55_P1997 | 111.4    | Detected | 97.1     | Detected   | 111.9    | Detected   | 130.7    | Detected   | Mylk          | 1.173249551 | 1.00448833 | 1.34603502 | 1.1524202 |
| A_51_P1367 | 127.6    | Detected | 165.6    | Detected   | 140.6    | Detected   | 149.7    | Detected   | Calcoco1      | 1.173197492 | 1.10188088 | 0.90398551 | 0.8490338 |
| A_52_P5764 | 27719.4  | Detected | 27520.1  | Detected   | 29323    | Detected   | 32519.3  | Detected   | Dap           | 1.173160314 | 1.05785118 | 1.18165632 | 1.0655121 |
| A_51_P1294 | 146568   | Detected | 121969.4 | Detected   | 166011.7 | Detected   | 171947.1 | Detected   | Scd2          | 1.173155805 | 1.13265993 | 1.40975605 | 1.361093  |
| A_51_P4161 | 1010.5   | Detected | 871.8    | Detected   | 890.6    | Detected   | 1185.4   | Detected   | Slc31a2       | 1.173082632 | 0.88134587 | 1.35971553 | 1.0215646 |
| A_55_P2054 | 83.8     | Detected | 75.6     | Detected   | 79.1     | Detected   | 98.3     | Detected   | Tmem255b      | 1.173031026 | 0.94391408 | 1.30026455 | 1.0462963 |
| A_55_P2091 | 453.8    | Detected | 552.5    | Detected   | 479.5    | Detected   | 532.3    | Detected   | Nxn1          | 1.172983693 | 1.05663288 | 0.96343891 | 0.8678733 |
| A_51_P4164 | 15955.5  | Detected | 13512.7  | Detected   | 19559    | Detected   | 18713.9  | Detected   | Zdhhc6        | 1.172880825 | 1.22584689 | 1.38491197 | 1.4474531 |
| A_55_P2056 | 20009.9  | Detected | 21109.4  | Detected   | 25196.2  | Detected   | 23468.8  | Detected   | Mrps21        | 1.172859435 | 1.2591867  | 1.11177011 | 1.193601  |
| A_55_P2019 | 6485.2   | Detected | 5948.9   | Detected   | 6301.1   | Detected   | 7606.2   | Detected   | Rnf20         | 1.172855116 | 0.97161229 | 1.27858932 | 1.0592042 |
| A_51_P4809 | 7278.7   | Detected | 8379.3   | Detected   | 7170.5   | Detected   | 8536.5   | Detected   | Blmh          | 1.172805583 | 0.98513471 | 1.01876052 | 0.8557397 |
| A_55_P2084 | 24.9     | Detected | 29.3     | Detected   | 22.4     | Detected   | 29.2     | Not Detect | Phlpp2        | 1.172690763 | 0.89959839 | 0.99658703 | 0.7645051 |
| A_66_P1016 | 141.3    | Detected | 88.1     | Detected   | 90.3     | Detected   | 165.7    | Detected   | Scai          | 1.172682236 | 0.63906582 | 1.88081725 | 1.0249716 |
| A_55_P1996 | 277.4    | Detected | 293.9    | Detected   | 298.1    | Detected   | 325.3    | Detected   | 5033417F24Rik | 1.172674838 | 1.07462149 | 1.10683906 | 1.0142906 |
| A_51_P2886 | 707.7    | Detected | 749.1    | Detected   | 696.2    | Detected   | 829.9    | Detected   | Dusp11        | 1.172672036 | 0.98375018 | 1.10786277 | 0.9293819 |
| A_51_P3002 | 2830.5   | Detected | 3138.5   | Detected   | 3254.1   | Detected   | 3319.2   | Detected   | Rsl24d1       | 1.172655008 | 1.14965554 | 1.05757527 | 1.0368329 |
| A_52_P8044 | 16339.1  | Detected | 12938.2  | Detected   | 20957.4  | Detected   | 19157.4  | Detected   | Dpm2          | 1.172488081 | 1.28265327 | 1.4806851  | 1.619808  |
| A_51_P2176 | 37.7     | Detected | 27.2     | Detected   | 26.2     | Detected   | 44.2     | Not Detect | 1700019L03Rik | 1.172413793 | 0.69496021 | 1.625      | 0.9632353 |
| A_55_P2064 | 13251.8  | Detected | 11494.8  | Detected   | 14941.4  | Detected   | 15535.3  | Detected   | Capzb         | 1.172316214 | 1.12749966 | 1.35150677 | 1.2998399 |
| A_52_P4301 | 1371.3   | Detected | 1352.3   | Detected   | 1220.5   | Detected   | 1607.5   | Detected   | Dip2b         | 1.172245315 | 0.89003136 | 1.18871552 | 0.9025364 |
| A_55_P1953 | 761.8    | Detected | 597.4    | Detected   | 327      | Detected   | 893      | Detected   | Lrrc8b        | 1.172223681 | 0.42924652 | 1.49481085 | 0.5473719 |
| A_55_P2074 | 18       | Detected | 16.2     | Not Detect | 16.7     | Not Detect | 21.1     | Not Detect | Raly1         | 1.172222222 | 0.92777778 | 1.30246914 | 1.0308642 |
| A_55_P1966 | 11528.1  | Detected | 13594.3  | Detected   | 13371.9  | Detected   | 13512.9  | Detected   | Pmf1          | 1.172170609 | 1.15993963 | 0.9940122  | 0.9836402 |
| A_55_P2210 | 273.7    | Detected | 282.3    | Detected   | 347.1    | Detected   | 320.8    | Detected   | Gm12992       | 1.172086226 | 1.26817684 | 1.13637974 | 1.229543  |
| A_55_P2051 | 318.5    | Detected | 351.2    | Detected   | 317      | Detected   | 373.3    | Detected   | Gm8479        | 1.172056515 | 0.99529042 | 1.06292711 | 0.9026196 |
| A_52_P2740 | 767.3    | Detected | 585      | Detected   | 730.7    | Detected   | 899.3    | Detected   | Ssr1          | 1.1720318   | 0.95230027 | 1.53726496 | 1.2490598 |
| A_52_P4960 | 335339.9 | Detected | 333037.2 | Detected   | 346464.4 | Detected   | 393018.6 | Detected   | Fth1          | 1.172000707 | 1.0331738  | 1.1801042  | 1.0403174 |
| A_55_P2035 | 19931    | Detected | 21235.3  | Detected   | 20033.3  | Detected   | 23358.9  | Detected   | Strip1        | 1.17198836  | 1.00513271 | 1.1000033  | 0.9433961 |
| A_66_P1099 | 32       | Detected | 27.4     | Detected   | 37       | Detected   | 37.5     | Not Detect | Bnip2         | 1.171875    | 1.15625    | 1.36861314 | 1.350365  |
| A_51_P1517 | 3353.7   | Detected | 4020.7   | Detected   | 3679.7   | Detected   | 3929.9   | Detected   | Mief1         | 1.171810239 | 1.09720607 | 0.97741687 | 0.9151889 |
| A_51_P5135 | 4308.2   | Detected | 4217.6   | Detected   | 8583.3   | Detected   | 5048.2   | Detected   | Rfk           | 1.17176547  | 1.99231698 | 1.19693665 | 2.0351148 |
| A_55_P2014 | 5768.3   | Detected | 5234.2   | Detected   | 6834.1   | Detected   | 6758.3   | Detected   | Dvl3          | 1.171627689 | 1.18476848 | 1.29118108 | 1.3056628 |
| A_55_P2051 | 1476.8   | Detected | 1434.3   | Detected   | 1463.4   | Detected   | 1730.2   | Detected   | Ephx3         | 1.171587216 | 0.99092633 | 1.20630273 | 1.0202886 |
| A_51_P4866 | 8064.1   | Detected | 6794.1   | Detected   | 8059.2   | Detected   | 9447     | Detected   | Akr1b10       | 1.171488449 | 0.99939237 | 1.39047114 | 1.1862057 |
| A_55_P1957 | 24.5     | Detected | 21.7     | Detected   | 20.1     | Detected   | 28.7     | Not Detect | Bpifb1        | 1.171428571 | 0.82040816 | 1.32258065 | 0.9262673 |
| A_55_P2020 | 1811.4   | Detected | 1092.5   | Detected   | 1840.4   | Detected   | 2121.9   | Detected   | Abcc10        | 1.171414376 | 1.01600972 | 1.94224256 | 1.6845767 |

|            |          |            |          |            |          |          |          |            |               |             |             |            |            |           |
|------------|----------|------------|----------|------------|----------|----------|----------|------------|---------------|-------------|-------------|------------|------------|-----------|
| A_55_P2076 | 2409.1   | Detected   | 2241.5   | Detected   | 2223     | Detected | 2822     | Detected   | Pkd1l2        | 1.171391806 | 0.92275123  | 1.25897836 | 0.9917466  |           |
| A_52_P2479 | 4697.2   | Detected   | 4120.9   | Detected   | 7114.5   | Detected | 5502.1   | Detected   | Parl          | 1.171357404 | 1.51462573  | 1.3351695  | 1.7264433  |           |
| A_52_P6394 | 85.8     | Detected   | 94.4     | Detected   | 44.5     | Detected | 100.5    | Detected   | Fam71f1       | 1.171328671 | 0.51864802  | 1.06461864 | 0.4713983  |           |
| A_52_P7489 | 81195.9  | Detected   | 73384    | Detected   | 94857.4  | Detected | 95106.6  | Detected   | Cfl1          | 1.17132269  | 1.16825357  | 1.29601275 | 1.2926169  |           |
| A_52_P5203 | 46145.3  | Detected   | 37870.8  | Detected   | 60702.1  | Detected | 54047.3  | Detected   | Timm8b        | 1.171241708 | 1.31545575  | 1.42714968 | 1.6028735  |           |
| A_52_P5231 | 220.9    | Detected   | 177.4    | Detected   | 193.1    | Detected | 258.7    | Detected   | Sh2d6         | 1.171118153 | 0.8741512   | 1.45828636 | 1.0885006  |           |
| A_55_P2048 | 24069.9  | Detected   | 27284.4  | Detected   | 20554.6  | Detected | 28188.2  | Detected   | Tmem97        | 1.171097512 | 0.85395452  | 1.03312516 | 0.7533462  |           |
| A_55_P2214 | 7.6      | Not Detect | 3.6      | Not Detect | 17.2     | Detected | 8.9      | Not Detect | 1700058M13Rik | 1.171052632 | 2.26315789  | 2.47222222 | 4.7777778  |           |
| A_55_P2176 | 589.4    | Detected   | 625.1    | Detected   | 577.3    | Detected | 690.2    | Detected   | Tollip        | 1.171021378 | 0.97947065  | 1.10414334 | 0.9235322  |           |
| A_51_P3110 | 30673    | Detected   | 29901    | Detected   | 35454.4  | Detected | 35918.5  | Detected   | Malsu1        | 1.171013595 | 1.15588302  | 1.20124745 | 1.1857262  |           |
| A_51_P2160 | 21226.3  | Detected   | 23193.5  | Detected   | 22951.6  | Detected | 24855.5  | Detected   | Ddost         | 1.170976572 | 1.08128124  | 1.07165801 | 0.9895704  |           |
| A_55_P2392 | 100.6    | Detected   | 95.8     | Detected   | 62.6     | Detected | 117.8    | Detected   | BC055308      | 1.170974155 | 0.6222664   | 1.22964509 | 0.6534447  |           |
| A_51_P1880 | 23.4     | Detected   | 21.1     | Detected   | 29.4     | Detected | 27.4     | Not Detect | Rabgap1       | 1.170940171 | 1.25641026  | 1.2985782  | 1.3933649  |           |
| A_55_P1973 | 50.9     | Detected   | 46.4     | Detected   | 34.7     | Detected | 59.6     | Detected   | Gm10753       | 1.170923379 | 0.68172888  | 1.28448276 | 0.7478448  |           |
| A_51_P1457 | 165.1    | Detected   | 200.3    | Detected   | 555.6    | Detected | 193.3    | Detected   | Ambp          | 1.170805572 | 3.36523319  | 0.96505242 | 2.7738392  |           |
| A_55_P2121 | 761.4    | Detected   | 768.6    | Detected   | 917.1    | Detected | 891.4    | Detected   | Cul2          | 1.170738114 | 1.20449173  | 1.15977101 | 1.1932084  |           |
| A_55_P2085 | 675      | Detected   | 522.7    | Detected   | 284.2    | Detected | 790.2    | Detected   |               | 6-Sep       | 1.170666667 | 0.42103704 | 1.51176583 | 0.5437153 |
| A_51_P1306 | 20838.3  | Detected   | 21544.7  | Detected   | 23766.5  | Detected | 24394.7  | Detected   | Adk           | 1.170666513 | 1.1405201   | 1.13228311 | 1.1031251  |           |
| A_55_P2081 | 466      | Detected   | 468.3    | Detected   | 388      | Detected | 545.5    | Detected   | 9430015G10Rik | 1.170600858 | 0.83261803  | 1.16485159 | 0.8285287  |           |
| A_51_P3293 | 2853.6   | Detected   | 2693.7   | Detected   | 3829.6   | Detected | 3340.4   | Detected   | Slc19a2       | 1.170591534 | 1.34202411  | 1.2400787  | 1.4216876  |           |
| A_55_P2031 | 646.7    | Detected   | 340.6    | Detected   | 339.7    | Detected | 757      | Detected   | Bend6         | 1.170558219 | 0.5252822   | 2.22254844 | 0.9973576  |           |
| A_55_P2002 | 21.7     | Detected   | 21.8     | Detected   | 26.6     | Detected | 25.4     | Not Detect | Bre           | 1.170506912 | 1.22580645  | 1.16513761 | 1.2201835  |           |
| A_55_P1994 | 783.5    | Detected   | 1729.7   | Detected   | 686.2    | Detected | 917      | Detected   | Tma16         | 1.170389279 | 0.87581366  | 0.53014974 | 0.3967162  |           |
| A_55_P2024 | 3894.8   | Detected   | 3821.2   | Detected   | 2985.4   | Detected | 4558.4   | Detected   | Hspb11        | 1.170381021 | 0.76650919  | 1.19292369 | 0.7812729  |           |
| A_55_P2096 | 611.8    | Detected   | 504.3    | Detected   | 476.7    | Detected | 716      | Detected   | Rnf170        | 1.170317097 | 0.7791762   | 1.41978981 | 0.9452707  |           |
| A_52_P3598 | 499.3    | Detected   | 365.1    | Detected   | 429.6    | Detected | 584.3    | Detected   | Ntf5          | 1.170238334 | 0.86040457  | 1.60038346 | 1.1766639  |           |
| A_55_P1980 | 18100.3  | Detected   | 18433.6  | Detected   | 17378    | Detected | 21180.4  | Detected   | Ubr5          | 1.17016845  | 0.96009458  | 1.1490105  | 0.942735   |           |
| A_52_P6305 | 1948.8   | Detected   | 1611.9   | Detected   | 1650.8   | Detected | 2280.4   | Detected   | Epg5          | 1.170155993 | 0.84708539  | 1.41472796 | 1.024133   |           |
| A_51_P5071 | 4235.8   | Detected   | 4017.4   | Detected   | 4251.3   | Detected | 4956.1   | Detected   | 2310022A10Rik | 1.170050522 | 1.00365929  | 1.23365859 | 1.0582217  |           |
| A_55_P2279 | 41.2     | Detected   | 44.3     | Detected   | 33.8     | Detected | 48.2     | Detected   | 4930549C15Rik | 1.169902913 | 0.82038835  | 1.08803612 | 0.7629797  |           |
| A_55_P2032 | 3676     | Detected   | 3267.7   | Detected   | 2099.3   | Detected | 4300.4   | Detected   | Ctif          | 1.169858542 | 0.5710827   | 1.31603268 | 0.6424396  |           |
| A_55_P2001 | 143555.6 | Detected   | 151367.6 | Detected   | 158902.5 | Detected | 167936.2 | Detected   | Atp5g1        | 1.169833848 | 1.10690562  | 1.10945936 | 1.0497788  |           |
| A_66_P1202 | 61782.5  | Detected   | 52065.8  | Detected   | 71159.6  | Detected | 72269.7  | Detected   | Taf10         | 1.16974386  | 1.15177599  | 1.38804551 | 1.3667244  |           |
| A_55_P2180 | 21.8     | Detected   | 18.5     | Detected   | 21.1     | Detected | 25.5     | Not Detect | Olf1r649      | 1.169724771 | 0.96788991  | 1.37837838 | 1.1405405  |           |
| A_51_P1419 | 360.6    | Detected   | 502.5    | Detected   | 464.1    | Detected | 421.8    | Detected   | 1110008L16Rik | 1.169717138 | 1.28702163  | 0.83940299 | 0.9235821  |           |
| A_51_P3671 | 23574.8  | Detected   | 19881.3  | Detected   | 26116    | Detected | 27575.2  | Detected   | Pold1         | 1.169689669 | 1.10779307  | 1.3869918  | 1.3135962  |           |
| A_51_P2455 | 113107.1 | Detected   | 117977.8 | Detected   | 93586    | Detected | 132290.8 | Detected   | ND4           | 1.169606506 | 0.82741048  | 1.12131943 | 0.7932509  |           |
| A_51_P1551 | 2287.8   | Detected   | 3111     | Detected   | 2988.7   | Detected | 2675.8   | Detected   | Zfp672        | 1.169595244 | 1.30636419  | 0.86010929 | 0.9606879  |           |
| A_55_P2144 | 891.2    | Detected   | 1143.2   | Detected   | 892.8    | Detected | 1042.3   | Detected   | Pofut2        | 1.169546679 | 1.00179533  | 0.91173898 | 0.7809657  |           |
| A_55_P1998 | 121      | Detected   | 112.7    | Detected   | 89.4     | Detected | 141.5    | Detected   | Eif2ak4       | 1.169421488 | 0.73884298  | 1.2555457  | 0.7932564  |           |

|            |          |            |          |          |          |            |          |            |               |             |            |            |           |
|------------|----------|------------|----------|----------|----------|------------|----------|------------|---------------|-------------|------------|------------|-----------|
| A_66_P1372 | 2140.9   | Detected   | 1915.6   | Detected | 2320.7   | Detected   | 2503.6   | Detected   | Otof          | 1.169414732 | 1.08398337 | 1.30695343 | 1.2114742 |
| A_66_P1114 | 16018.9  | Detected   | 25798.2  | Detected | 17698    | Detected   | 18732.6  | Detected   | 2410006H16Rik | 1.169406139 | 1.10481993 | 0.72612043 | 0.6860169 |
| A_55_P1999 | 3465.8   | Detected   | 3068.8   | Detected | 3220     | Detected   | 4052.9   | Detected   | Gm2696        | 1.169398119 | 0.92907842 | 1.32067909 | 1.0492701 |
| A_55_P2180 | 154.1    | Detected   | 139.3    | Detected | 143.2    | Detected   | 180.2    | Detected   | Zfp940        | 1.169370539 | 0.92926671 | 1.29361091 | 1.0279971 |
| A_66_P1274 | 166.5    | Detected   | 146.9    | Detected | 190.3    | Detected   | 194.7    | Detected   | Gm5860        | 1.169369369 | 1.14294294 | 1.32539142 | 1.2954391 |
| A_55_P1953 | 31255.2  | Detected   | 37191.7  | Detected | 38085.2  | Detected   | 36546.4  | Detected   | Bop1          | 1.16929023  | 1.21852364 | 0.98264935 | 1.0240242 |
| A_55_P1954 | 3396.3   | Detected   | 3232.8   | Detected | 3799.6   | Detected   | 3971.2   | Detected   | Pars2         | 1.169272444 | 1.11874687 | 1.22840881 | 1.1753279 |
| A_52_P8779 | 33.1     | Detected   | 26.2     | Detected | 25.9     | Detected   | 38.7     | Not Detect | Olfr635       | 1.16918429  | 0.78247734 | 1.47709924 | 0.9885496 |
| A_55_P1961 | 2338.8   | Detected   | 2446.5   | Detected | 2630.3   | Detected   | 2734.3   | Detected   | Dtd2          | 1.169103814 | 1.12463657 | 1.11763744 | 1.0751277 |
| A_55_P2167 | 410.4    | Detected   | 403.4    | Detected | 399.1    | Detected   | 479.8    | Detected   | Cnot3         | 1.169103314 | 0.97246589 | 1.18939018 | 0.9893406 |
| A_51_P1094 | 3296.3   | Detected   | 3714.1   | Detected | 3833.8   | Detected   | 3853.7   | Detected   | Eif2d         | 1.169098686 | 1.16306161 | 1.03758649 | 1.0322285 |
| A_52_P3381 | 1925.5   | Detected   | 1443.7   | Detected | 2536.2   | Detected   | 2250.9   | Detected   | Chmp1b        | 1.168995066 | 1.31716437 | 1.55911893 | 1.7567362 |
| A_51_P5190 | 1015.1   | Detected   | 1221.7   | Detected | 1252.6   | Detected   | 1186.6   | Detected   | Mkx           | 1.168948872 | 1.2339671  | 0.97126954 | 1.0252926 |
| A_51_P1186 | 2964.7   | Detected   | 2489.9   | Detected | 2911     | Detected   | 3465.5   | Detected   | Wdr82         | 1.16892097  | 0.98188687 | 1.39182296 | 1.1691233 |
| A_66_P1017 | 5731.1   | Detected   | 5254.1   | Detected | 5544.7   | Detected   | 6698.9   | Detected   | Sp1           | 1.168868106 | 0.9674757  | 1.27498525 | 1.0553092 |
| A_55_P2015 | 3653.9   | Detected   | 2604.4   | Detected | 3511.9   | Detected   | 4270.8   | Detected   | Cggbp1        | 1.168833301 | 0.96113741 | 1.63984027 | 1.3484488 |
| A_55_P2081 | 20206.4  | Detected   | 20482.2  | Detected | 24165.8  | Detected   | 23611.2  | Detected   | Mrpl55        | 1.168501069 | 1.19594782 | 1.15276679 | 1.179844  |
| A_52_P5795 | 518.8    | Detected   | 643.1    | Detected | 550.6    | Detected   | 606.2    | Detected   | Cox10         | 1.16846569  | 1.0612953  | 0.94262168 | 0.8561654 |
| A_51_P1870 | 66661.5  | Detected   | 57135.4  | Detected | 68034.9  | Detected   | 77891    | Detected   | G6pdx         | 1.168455555 | 1.0206026  | 1.36327041 | 1.1907661 |
| A_52_P2738 | 1677.6   | Detected   | 1226.9   | Detected | 1960.4   | Detected   | 1960.2   | Detected   | Abhd5         | 1.168454936 | 1.16857415 | 1.59768522 | 1.5978482 |
| A_55_P2083 | 38       | Detected   | 50.1     | Detected | 46       | Detected   | 44.4     | Not Detect | Gm10781       | 1.168421053 | 1.21052632 | 0.88622754 | 0.9181637 |
| A_52_P3202 | 9.5      | Not Detect | 62.1     | Detected | 12.8     | Not Detect | 11.1     | Not Detect | Cpa2          | 1.168421053 | 1.34736842 | 0.17874396 | 0.2061192 |
| A_55_P2006 | 183.5    | Detected   | 197.1    | Detected | 178.2    | Detected   | 214.4    | Detected   | Fgf22         | 1.168392371 | 0.97111717 | 1.0877727  | 0.9041096 |
| A_55_P2174 | 5444     | Detected   | 6617.6   | Detected | 5201.3   | Detected   | 6360.7   | Detected   | Elac2         | 1.168387215 | 0.95541881 | 0.96117928 | 0.7859798 |
| A_55_P2106 | 3567.6   | Detected   | 2353.7   | Detected | 3020.7   | Detected   | 4168.1   | Detected   | Herc2         | 1.16832044  | 0.84670367 | 1.77087139 | 1.2833836 |
| A_55_P2096 | 6078.4   | Detected   | 4806.2   | Detected | 6528.1   | Detected   | 7101.3   | Detected   | Fbxl19        | 1.168284417 | 1.07398329 | 1.47752903 | 1.3582664 |
| A_55_P2177 | 4911.4   | Detected   | 4732     | Detected | 5149.3   | Detected   | 5737.6   | Detected   | Adra1b        | 1.168220874 | 1.04843833 | 1.21251057 | 1.0881868 |
| A_55_P1953 | 24371    | Detected   | 31697.5  | Detected | 23466.6  | Detected   | 28470.6  | Detected   | Sdhb          | 1.168216323 | 0.96289032 | 0.89819702 | 0.7403297 |
| A_55_P2002 | 11128.8  | Detected   | 13487.7  | Detected | 12422.7  | Detected   | 12998.4  | Detected   | Sarnp         | 1.167996549 | 1.1162659  | 0.9637225  | 0.9210392 |
| A_51_P2801 | 33214.6  | Detected   | 31414.1  | Detected | 37212    | Detected   | 38794.5  | Detected   | Sf3b2         | 1.1679954   | 1.12035069 | 1.23493909 | 1.1845636 |
| A_55_P2023 | 2971.3   | Detected   | 2886.9   | Detected | 3072.6   | Detected   | 3470.4   | Detected   | Impg1         | 1.167973614 | 1.03409282 | 1.20211992 | 1.0643251 |
| A_51_P1528 | 7583.6   | Detected   | 8298.7   | Detected | 7678.7   | Detected   | 8857.4   | Detected   | Trim24        | 1.16796772  | 1.01254022 | 1.0673238  | 0.9252895 |
| A_52_P5394 | 3065     | Detected   | 3340.9   | Detected | 3667.7   | Detected   | 3579.7   | Detected   | Gtf2h3        | 1.167928222 | 1.19663948 | 1.07147775 | 1.097818  |
| A_55_P2007 | 244287.4 | Detected   | 294149.3 | Detected | 277022.8 | Detected   | 285291.3 | Detected   | Gm8709        | 1.167851064 | 1.13400364 | 0.96988604 | 0.9417762 |
| A_55_P2012 | 354100.1 | Detected   | 388091.7 | Detected | 364355.4 | Detected   | 413531.8 | Detected   | Ldha          | 1.167838699 | 1.02896158 | 1.06555178 | 0.9388384 |
| A_52_P1909 | 8120.6   | Detected   | 13020.1  | Detected | 7543.7   | Detected   | 9483.3   | Detected   | Vcl           | 1.167807797 | 0.92895845 | 0.72835846 | 0.5793888 |
| A_55_P2106 | 1711.6   | Detected   | 1857     | Detected | 1857.5   | Detected   | 1998.8   | Detected   | Wnt1          | 1.167796214 | 1.08524188 | 1.07635972 | 1.0002693 |
| A_55_P2185 | 64.4     | Detected   | 63.5     | Detected | 69.5     | Detected   | 75.2     | Detected   | Tmem28        | 1.167701863 | 1.07919255 | 1.18425197 | 1.0944882 |
| A_52_P6449 | 589.2    | Detected   | 533.9    | Detected | 551.4    | Detected   | 688      | Detected   | Zbtb39        | 1.167684997 | 0.93584521 | 1.28863083 | 1.0327777 |
| A_55_P2112 | 4828.4   | Detected   | 3313.7   | Detected | 5670.6   | Detected   | 5638     | Detected   | Nudt16l1      | 1.167674592 | 1.17442631 | 1.70142137 | 1.7112593 |

|            |                   |                  |                   |                   |               |             |            |            |           |
|------------|-------------------|------------------|-------------------|-------------------|---------------|-------------|------------|------------|-----------|
| A_52_P1404 | 537.4 Detected    | 511.3 Detected   | 511.2 Detected    | 627.5 Detected    | Golga3        | 1.167659099 | 0.95124674 | 1.22726384 | 0.9998044 |
| A_55_P2233 | 36.4 Detected     | 33.4 Detected    | 39.9 Detected     | 42.5 Not Detect   | 2700022O18Rik | 1.167582418 | 1.09615385 | 1.27245509 | 1.1946108 |
| A_55_P1962 | 1769.2 Detected   | 1791.2 Detected  | 1755.4 Detected   | 2065.3 Detected   | Adam11        | 1.16736378  | 0.99219986 | 1.1530259  | 0.9800134 |
| A_52_P1253 | 241.5 Detected    | 79.1 Detected    | 153.9 Detected    | 281.9 Detected    | Rbp2          | 1.167287785 | 0.63726708 | 3.56384324 | 1.9456384 |
| A_51_P3897 | 2447 Detected     | 2162.1 Detected  | 1780.6 Detected   | 2856.3 Detected   | Phlpp2        | 1.16726604  | 0.72766653 | 1.32107673 | 0.8235512 |
| A_51_P4223 | 176.4 Detected    | 184.2 Detected   | 177.4 Detected    | 205.9 Detected    | Zfp420        | 1.16723356  | 1.00566893 | 1.11780673 | 0.9630836 |
| A_55_P2298 | 1194.8 Detected   | 1541.2 Detected  | 958.8 Detected    | 1394.6 Detected   | Whsc111       | 1.16722464  | 0.8024774  | 0.90487931 | 0.6221126 |
| A_51_P1510 | 65.2 Detected     | 47.4 Detected    | 46.3 Detected     | 76.1 Detected     | Tnp1          | 1.167177914 | 0.7101227  | 1.60548523 | 0.9767932 |
| A_52_P4951 | 685 Detected      | 798.7 Detected   | 725.9 Detected    | 799.5 Detected    | Rrnad1        | 1.167153285 | 1.05970803 | 1.00100163 | 0.9088519 |
| A_51_P1109 | 37.1 Detected     | 42.8 Detected    | 35 Detected       | 43.3 Not Detect   | 1700010D01Rik | 1.167115903 | 0.94339623 | 1.01168224 | 0.817757  |
| A_55_P1986 | 620.7 Detected    | 472.5 Detected   | 872.8 Detected    | 724.4 Detected    | Olf1319       | 1.167069438 | 1.40615434 | 1.53312169 | 1.8471958 |
| A_51_P2505 | 46.1 Detected     | 34.4 Detected    | 23.3 Detected     | 53.8 Detected     | Kcnj14        | 1.1670282   | 0.50542299 | 1.56395349 | 0.6773256 |
| A_55_P2037 | 73605.1 Detected  | 93958.1 Detected | 89696.4 Detected  | 85889.7 Detected  | Gm6921        | 1.166898761 | 1.21861664 | 0.91412768 | 0.9546425 |
| A_51_P1339 | 174.4 Detected    | 136.5 Detected   | 101.3 Detected    | 203.5 Detected    | Lmln          | 1.166857798 | 0.58084862 | 1.49084249 | 0.7421245 |
| A_52_P3101 | 555.2 Detected    | 440 Detected     | 557.1 Detected    | 647.8 Detected    | 4922501C03Rik | 1.166786744 | 1.00342219 | 1.47227273 | 1.2661364 |
| A_55_P2035 | 289 Detected      | 281.8 Detected   | 306.4 Detected    | 337.2 Detected    | Cep89         | 1.166782007 | 1.06020761 | 1.19659333 | 1.087296  |
| A_55_P2036 | 146.3 Detected    | 160.7 Detected   | 130.3 Detected    | 170.7 Detected    | Gm13547       | 1.166780588 | 0.89063568 | 1.06222775 | 0.8108276 |
| A_55_P2052 | 70281.2 Detected  | 57022.6 Detected | 62711.8 Detected  | 82002.7 Detected  | Gdi2          | 1.166780021 | 0.89229837 | 1.43807368 | 1.099771  |
| A_52_P1179 | 1157.3 Detected   | 1201.7 Detected  | 1257.4 Detected   | 1350.3 Detected   | Selt          | 1.166767476 | 1.08649443 | 1.12365815 | 1.046351  |
| A_55_P2025 | 3145.7 Detected   | 3228.5 Detected  | 3470.9 Detected   | 3670.1 Detected   | Fanci         | 1.166703754 | 1.10337922 | 1.13678179 | 1.0750813 |
| A_52_P2333 | 6134 Detected     | 7170.1 Detected  | 6209.5 Detected   | 7156.4 Detected   | Pphln1        | 1.166677535 | 1.01230844 | 0.99808929 | 0.866027  |
| A_55_P2101 | 32185.8 Detected  | 32899 Detected   | 43076.5 Detected  | 37550.3 Detected  | Mrps25        | 1.166672881 | 1.33836972 | 1.1413812  | 1.3093559 |
| A_55_P2111 | 28.8 Detected     | 27.2 Detected    | 42.4 Detected     | 33.6 Not Detect   | 1700001C02Rik | 1.166666667 | 1.47222222 | 1.23529412 | 1.5588235 |
| A_52_P2850 | 9 Not Detect      | 152.2 Detected   | 3.7 Not Detect    | 10.5 Not Detect   | Sertad4       | 1.166666667 | 0.41111111 | 0.06898817 | 0.0243101 |
| A_55_P1966 | 24.6 Detected     | 58.9 Detected    | 22.1 Detected     | 28.7 Not Detect   | LnX1          | 1.166666667 | 0.89837398 | 0.48726655 | 0.3752122 |
| A_55_P2175 | 272.5 Detected    | 238.4 Detected   | 207 Detected      | 317.9 Detected    | Zfp467        | 1.166605505 | 0.75963303 | 1.33347315 | 0.8682886 |
| A_55_P2143 | 228.1 Detected    | 218.2 Detected   | 229.7 Detected    | 266.1 Detected    | Hrh4          | 1.166593599 | 1.00701447 | 1.21952337 | 1.0527039 |
| A_55_P2005 | 197.7 Detected    | 207.2 Detected   | 238.5 Detected    | 230.6 Detected    | Cntf          | 1.166413758 | 1.20637329 | 1.11293436 | 1.1510618 |
| A_51_P2144 | 4529.8 Detected   | 3080.5 Detected  | 3939 Detected     | 5283.3 Detected   | Tead1         | 1.166342885 | 0.86957482 | 1.71507872 | 1.2786885 |
| A_55_P2023 | 147.9 Detected    | 151.9 Detected   | 147.7 Detected    | 172.5 Detected    | Miox          | 1.1663286   | 0.99864773 | 1.13561554 | 0.9723502 |
| A_52_P6108 | 744.2 Detected    | 753.7 Detected   | 567.7 Detected    | 867.9 Detected    | Hexdc         | 1.166218758 | 0.76283257 | 1.15151917 | 0.7532175 |
| A_51_P5193 | 1801.5 Detected   | 1497.2 Detected  | 1609.5 Detected   | 2100.8 Detected   | Agtppb1       | 1.166139328 | 0.89342215 | 1.40315255 | 1.0750067 |
| A_55_P2144 | 147.5 Detected    | 181.4 Detected   | 143.9 Detected    | 172 Detected      | Gm10869       | 1.166101695 | 0.97559322 | 0.94818082 | 0.7932745 |
| A_55_P2170 | 4240.1 Detected   | 4236.7 Detected  | 3702.2 Detected   | 4944.3 Detected   | Cdca8         | 1.166080989 | 0.87313978 | 1.16701678 | 0.8738405 |
| A_55_P2107 | 1037.1 Detected   | 1196 Detected    | 1251.2 Detected   | 1209.3 Detected   | Ttll1         | 1.166039919 | 1.20644104 | 1.0111204  | 1.0461538 |
| A_55_P2111 | 7750 Detected     | 7770.3 Detected  | 6314.2 Detected   | 9036.8 Detected   | Pafah1b1      | 1.16603871  | 0.81473548 | 1.16299242 | 0.812607  |
| A_52_P3170 | 793.8 Detected    | 740.2 Detected   | 943.3 Detected    | 925.6 Detected    | Edem2         | 1.166036785 | 1.18833459 | 1.25047285 | 1.2743853 |
| A_55_P1954 | 2236.6 Detected   | 1875.5 Detected  | 2261.1 Detected   | 2607.9 Detected   | Il17rc        | 1.166010909 | 1.01095413 | 1.3905092  | 1.2055985 |
| A_55_P1965 | 92.2 Detected     | 116.5 Detected   | 57.1 Detected     | 107.5 Detected    | Wdr19         | 1.165943601 | 0.61930586 | 0.92274678 | 0.4901288 |
| A_55_P2143 | 176472.4 Detected | 192927 Detected  | 177066.7 Detected | 205756.4 Detected | LOC100505283  | 1.165940963 | 1.00336767 | 1.06649873 | 0.9177912 |

|            |          |          |          |            |          |            |          |            |               |             |            |            |           |
|------------|----------|----------|----------|------------|----------|------------|----------|------------|---------------|-------------|------------|------------|-----------|
| A_52_P2126 | 2046     | Detected | 1914.1   | Detected   | 2012.5   | Detected   | 2385.5   | Detected   | Lrrk1         | 1.165933529 | 0.98362659 | 1.24627762 | 1.051408  |
| A_52_P1948 | 51850.2  | Detected | 51371.6  | Detected   | 64216.5  | Detected   | 60451.7  | Detected   | Zfp706        | 1.165891356 | 1.23850053 | 1.1767533  | 1.2500389 |
| A_55_P1960 | 5582.5   | Detected | 5893.2   | Detected   | 5478.3   | Detected   | 6508.1   | Detected   | Med7          | 1.165803851 | 0.98133453 | 1.1043406  | 0.9295968 |
| A_55_P2181 | 203.3    | Detected | 133      | Detected   | 191.3    | Detected   | 237      | Detected   | Pydc3         | 1.165764879 | 0.94097393 | 1.78195489 | 1.4383459 |
| A_51_P1035 | 36.8     | Detected | 35.2     | Detected   | 28.8     | Detected   | 42.9     | Not Detect | Cacna1s       | 1.16576087  | 0.7826087  | 1.21875    | 0.8181818 |
| A_51_P2498 | 5680.2   | Detected | 6377.2   | Detected   | 6411.4   | Detected   | 6621.7   | Detected   | Snrnp48       | 1.165751206 | 1.12872786 | 1.03833971 | 1.0053629 |
| A_51_P1775 | 74564.2  | Detected | 87991.8  | Detected   | 91343.3  | Detected   | 86921.4  | Detected   | Ndufb9        | 1.165725643 | 1.2250289  | 0.98783523 | 1.0380888 |
| A_51_P1603 | 24137.7  | Detected | 19197.8  | Detected   | 21610.3  | Detected   | 28137.9  | Detected   | Cenpv         | 1.165724158 | 0.89529243 | 1.46568357 | 1.1256654 |
| A_55_P2106 | 1278.7   | Detected | 980.1    | Detected   | 935.6    | Detected   | 1490.6   | Detected   | Slc9a2        | 1.165715179 | 0.73168061 | 1.52086522 | 0.9545965 |
| A_55_P2108 | 17.5     | Detected | 25.4     | Detected   | 25.2     | Detected   | 20.4     | Not Detect | Epb4.1l4b     | 1.165714286 | 1.44       | 0.80314961 | 0.992126  |
| A_52_P1445 | 118.3    | Detected | 82       | Detected   | 94.5     | Detected   | 137.9    | Detected   | Atxn1         | 1.165680473 | 0.79881657 | 1.68170732 | 1.152439  |
| A_51_P5107 | 16.9     | Detected | 14.1     | Not Detect | 12.2     | Not Detect | 19.7     | Not Detect | Agmo          | 1.165680473 | 0.72189349 | 1.39716312 | 0.8652482 |
| A_55_P2134 | 33.2     | Detected | 37.3     | Detected   | 34.5     | Detected   | 38.7     | Not Detect | Rgs9bp        | 1.165662651 | 1.03915663 | 1.03753351 | 0.924933  |
| A_55_P2158 | 282844.9 | Detected | 346687.5 | Detected   | 296605.2 | Detected   | 329693.3 | Detected   | Rpl18a        | 1.165632826 | 1.04864963 | 0.95098122 | 0.8555405 |
| A_55_P2134 | 30.8     | Detected | 31.6     | Detected   | 35.2     | Detected   | 35.9     | Not Detect | Brsk2         | 1.165584416 | 1.14285714 | 1.13607595 | 1.1139241 |
| A_52_P5893 | 105.7    | Detected | 92.8     | Detected   | 104      | Detected   | 123.2    | Detected   | Doc2a         | 1.165562914 | 0.98391675 | 1.32758621 | 1.1206897 |
| A_55_P2393 | 2470.6   | Detected | 2267     | Detected   | 2154.6   | Detected   | 2879.5   | Detected   | 6430584L05Rik | 1.165506355 | 0.87209585 | 1.27018086 | 0.9504191 |
| A_52_P3991 | 293.2    | Detected | 333.4    | Detected   | 344.7    | Detected   | 341.7    | Detected   | Tmem138       | 1.165416098 | 1.17564802 | 1.02489502 | 1.0338932 |
| A_55_P2037 | 339.8    | Detected | 346.5    | Detected   | 380.2    | Detected   | 396      | Detected   | Tyw1          | 1.165391407 | 1.11889347 | 1.14285714 | 1.0972583 |
| A_55_P1958 | 5708.4   | Detected | 5246     | Detected   | 4685.9   | Detected   | 6652.1   | Detected   | Mospd1        | 1.165317777 | 0.820878   | 1.26803279 | 0.8932329 |
| A_55_P2131 | 24251.5  | Detected | 25030.3  | Detected   | 26122.1  | Detected   | 28260.6  | Detected   | Ybx1          | 1.165313486 | 1.07713337 | 1.12905558 | 1.0436191 |
| A_66_P1093 | 15148.2  | Detected | 18558.6  | Detected   | 11989    | Detected   | 17651.4  | Detected   | Snapc2        | 1.165247356 | 0.79144717 | 0.951117   | 0.6460078 |
| A_51_P4655 | 790.4    | Detected | 853.8    | Detected   | 939.9    | Detected   | 921      | Detected   | Hdhd3         | 1.165232794 | 1.18914474 | 1.07870696 | 1.1008433 |
| A_55_P1992 | 6593.5   | Detected | 6778     | Detected   | 5914.2   | Detected   | 7682.6   | Detected   | Nudc          | 1.165177827 | 0.89697429 | 1.1334612  | 0.8725583 |
| A_51_P2854 | 37912.9  | Detected | 33262.7  | Detected   | 38424.9  | Detected   | 44174.3  | Detected   | Lig1          | 1.165152231 | 1.01350464 | 1.32804312 | 1.1551949 |
| A_55_P1952 | 21.8     | Detected | 23.9     | Detected   | 23.8     | Detected   | 25.4     | Not Detect | Olf417        | 1.165137615 | 1.09174312 | 1.06276151 | 0.9958159 |
| A_55_P2002 | 830.5    | Detected | 1090.1   | Detected   | 923.3    | Detected   | 967.6    | Detected   | Wdr89         | 1.165081276 | 1.11173992 | 0.88762499 | 0.8469865 |
| A_55_P1961 | 353.9    | Detected | 264.6    | Detected   | 266.1    | Detected   | 412.3    | Detected   | Gm17778       | 1.165018367 | 0.75190732 | 1.55820106 | 1.0056689 |
| A_51_P2721 | 5975     | Detected | 5213     | Detected   | 6385.6   | Detected   | 6960.7   | Detected   | Emc9          | 1.164970711 | 1.06871967 | 1.33525801 | 1.2249377 |
| A_55_P2086 | 38.8     | Detected | 59.8     | Detected   | 26.1     | Detected   | 45.2     | Not Detect | Gm5590        | 1.164948454 | 0.67268041 | 0.75585284 | 0.4364548 |
| A_55_P2048 | 26882.3  | Detected | 34520.5  | Detected   | 21221.8  | Detected   | 31313.9  | Detected   | Cbfb          | 1.164851966 | 0.78943394 | 0.90711027 | 0.6147593 |
| A_51_P1901 | 46611.6  | Detected | 60149.4  | Detected   | 42247.7  | Detected   | 54292.6  | Detected   | Mcm5          | 1.164787306 | 0.90637738 | 0.90262912 | 0.7023794 |
| A_55_P2078 | 25866.5  | Detected | 27044.1  | Detected   | 27392.7  | Detected   | 30128.5  | Detected   | 1810022K09Rik | 1.164769103 | 1.05900296 | 1.11405075 | 1.0128901 |
| A_55_P2141 | 1855.7   | Detected | 1705.7   | Detected   | 1840.4   | Detected   | 2161.4   | Detected   | AU022252      | 1.164735679 | 0.99175513 | 1.26716304 | 1.0789705 |
| A_55_P1980 | 94.1     | Detected | 100.2    | Detected   | 109.4    | Detected   | 109.6    | Detected   | Gm5901        | 1.164718385 | 1.16259299 | 1.09381238 | 1.0918164 |
| A_52_P9941 | 40691.2  | Detected | 44097.5  | Detected   | 66795.6  | Detected   | 47393.7  | Detected   | Itm2b         | 1.164716204 | 1.64152446 | 1.074748   | 1.5147253 |
| A_51_P2601 | 2660.7   | Detected | 3867.8   | Detected   | 4130.9   | Detected   | 3098.8   | Detected   | Gstm5         | 1.164655918 | 1.55256136 | 0.80117896 | 1.0680232 |
| A_52_P2310 | 74.1     | Detected | 69.6     | Detected   | 97.4     | Detected   | 86.3     | Detected   | Carf          | 1.164642375 | 1.31443995 | 1.23994253 | 1.3994253 |
| A_51_P2173 | 6875.3   | Detected | 5178.8   | Detected   | 5808.6   | Detected   | 8007.2   | Detected   | Scamp1        | 1.164632816 | 0.84485041 | 1.54614969 | 1.1216112 |
| A_51_P4155 | 3300.8   | Detected | 3093.1   | Detected   | 3201.1   | Detected   | 3844.1   | Detected   | Tmem39a       | 1.164596461 | 0.9697952  | 1.24279849 | 1.0349164 |

|            |          |          |          |            |         |          |          |            |               |             |            |            |           |
|------------|----------|----------|----------|------------|---------|----------|----------|------------|---------------|-------------|------------|------------|-----------|
| A_55_P2021 | 13669.2  | Detected | 16284    | Detected   | 12272.4 | Detected | 15918.8  | Detected   | Sun2          | 1.164574372 | 0.89781406 | 0.97757308 | 0.7536478 |
| A_51_P3653 | 134.9    | Detected | 128.5    | Detected   | 105.9   | Detected | 157.1    | Detected   | Best2         | 1.164566345 | 0.78502595 | 1.22256809 | 0.8241245 |
| A_51_P3097 | 609.1    | Detected | 862.1    | Detected   | 883     | Detected | 709.3    | Detected   | Gpr89         | 1.164505007 | 1.44967986 | 0.82275838 | 1.0242431 |
| A_51_P3231 | 114.9    | Detected | 149.7    | Detected   | 93.1    | Detected | 133.8    | Detected   | Mfsd8         | 1.164490862 | 0.8102698  | 0.89378758 | 0.6219105 |
| A_55_P2165 | 80.9     | Detected | 62.1     | Detected   | 89.8    | Detected | 94.2     | Detected   | Olf9          | 1.164400494 | 1.11001236 | 1.51690821 | 1.4460548 |
| A_66_P1163 | 925.5    | Detected | 668.7    | Detected   | 598.8   | Detected | 1077.6   | Detected   | Tlcd2         | 1.164343598 | 0.64700162 | 1.61148497 | 0.8954688 |
| A_55_P2081 | 144.9    | Detected | 94.9     | Detected   | 137     | Detected | 168.7    | Detected   | Gpr27         | 1.164251208 | 0.94547964 | 1.7776607  | 1.4436249 |
| A_55_P1959 | 41738.7  | Detected | 35237.5  | Detected   | 48586.5 | Detected | 48592.8  | Detected   | Rbm42         | 1.164214506 | 1.16406357 | 1.37900816 | 1.3788294 |
| A_51_P1798 | 5795.2   | Detected | 4842.5   | Detected   | 4504.2  | Detected | 6746.7   | Detected   | Prkx          | 1.164187604 | 0.77722943 | 1.39322664 | 0.9301394 |
| A_55_P2094 | 319671.8 | Detected | 351415.3 | Detected   | 303432  | Detected | 372145.8 | Detected   | Phyhd1        | 1.164149606 | 0.94919852 | 1.05899146 | 0.863457  |
| A_51_P4168 | 37762.2  | Detected | 45137.8  | Detected   | 49429   | Detected | 43958.9  | Detected   | Nedd8         | 1.16409796  | 1.30895446 | 0.9738822  | 1.0950689 |
| A_55_P1955 | 434      | Detected | 408.7    | Detected   | 363.6   | Detected | 505.2    | Detected   | Ifitm7        | 1.1640553   | 0.83778802 | 1.23611451 | 0.8896501 |
| A_55_P2043 | 38272.8  | Detected | 29187.6  | Detected   | 40659.6 | Detected | 44551.6  | Detected   | Tfg           | 1.164053845 | 1.06236283 | 1.52638792 | 1.3930436 |
| A_55_P2001 | 5417.3   | Detected | 5736.5   | Detected   | 6169.1  | Detected | 6305.4   | Detected   | Pydc3         | 1.163937755 | 1.13877762 | 1.09917197 | 1.0754118 |
| A_55_P2101 | 77.5     | Detected | 82.7     | Detected   | 77.1    | Detected | 90.2     | Detected   | Apitd1        | 1.163870968 | 0.99483871 | 1.09068924 | 0.9322854 |
| A_55_P1961 | 3714.4   | Detected | 5639.8   | Detected   | 3425.7  | Detected | 4323     | Detected   | Dcc           | 1.163848805 | 0.92227547 | 0.76651654 | 0.6074152 |
| A_52_P1128 | 4828.6   | Detected | 4195.2   | Detected   | 3745.4  | Detected | 5619.4   | Detected   | Atp6v1h       | 1.163774179 | 0.77566997 | 1.33948322 | 0.8927822 |
| A_55_P2155 | 777.3    | Detected | 720.4    | Detected   | 640.7   | Detected | 904.6    | Detected   | Klc1          | 1.163772031 | 0.82426348 | 1.25569128 | 0.889367  |
| A_55_P2102 | 13999    | Detected | 14026.9  | Detected   | 11910.7 | Detected | 16291    | Detected   | Rdh12         | 1.16372598  | 0.85082506 | 1.16141129 | 0.8491327 |
| A_52_P6003 | 102      | Detected | 67.8     | Detected   | 100     | Detected | 118.7    | Detected   | Slc25a46      | 1.16372549  | 0.98039216 | 1.75073746 | 1.4749263 |
| A_51_P3576 | 23462.1  | Detected | 19438.8  | Detected   | 24963.6 | Detected | 27300.3  | Detected   | Hras1         | 1.163591494 | 1.06399683 | 1.40442311 | 1.2842151 |
| A_51_P4798 | 10878.9  | Detected | 12397.5  | Detected   | 12304.4 | Detected | 12658.2  | Detected   | Cpsf3         | 1.163555139 | 1.13103347 | 1.02102843 | 0.9924904 |
| A_55_P1955 | 105.8    | Detected | 112.5    | Detected   | 99.8    | Detected | 123.1    | Detected   | Gm1715        | 1.163516068 | 0.94328922 | 1.09422222 | 0.8871111 |
| A_55_P2028 | 83.8     | Detected | 75.7     | Detected   | 86.9    | Detected | 97.5     | Detected   | Lrrc36        | 1.163484487 | 1.03699284 | 1.28797886 | 1.1479524 |
| A_55_P2120 | 20415.8  | Detected | 22309.7  | Detected   | 21155.4 | Detected | 23753    | Detected   | Snrpa1        | 1.163461633 | 1.03622684 | 1.06469383 | 0.9482602 |
| A_52_P5369 | 188.5    | Detected | 218.9    | Detected   | 196.5   | Detected | 219.3    | Detected   | Satb2         | 1.163395225 | 1.04244032 | 1.00182732 | 0.8976702 |
| A_52_P4941 | 828.4    | Detected | 869.4    | Detected   | 791.2   | Detected | 963.7    | Detected   | Gatad2b       | 1.163326895 | 0.95509416 | 1.10846561 | 0.9100529 |
| A_51_P1442 | 797.1    | Detected | 628.8    | Detected   | 934     | Detected | 927.2    | Detected   | Ubr1          | 1.16321666  | 1.17174758 | 1.47455471 | 1.485369  |
| A_55_P2039 | 949.1    | Detected | 403.1    | Detected   | 860.3   | Detected | 1104     | Detected   | Nfkbiz        | 1.163207249 | 0.90643768 | 2.7387745  | 2.1342099 |
| A_55_P2000 | 148.9    | Detected | 150.3    | Detected   | 122.5   | Detected | 173.2    | Detected   | Cryba4        | 1.163196776 | 0.8226998  | 1.15236194 | 0.8150366 |
| A_55_P2111 | 131.2    | Detected | 122.6    | Detected   | 132.4   | Detected | 152.6    | Detected   | 9230113P08Rik | 1.163109756 | 1.00914634 | 1.24469821 | 1.0799347 |
| A_52_P5847 | 3201.1   | Detected | 4207.5   | Detected   | 2874.3  | Detected | 3723.2   | Detected   | Tmem199       | 1.163100184 | 0.89791009 | 0.88489602 | 0.6831373 |
| A_51_P3595 | 209.7    | Detected | 159.9    | Detected   | 86.1    | Detected | 243.9    | Detected   | Ifit3         | 1.163090129 | 0.41058655 | 1.52532833 | 0.5384615 |
| A_51_P3021 | 1920     | Detected | 2222.4   | Detected   | 2035.8  | Detected | 2232.9   | Detected   | Cfl2          | 1.16296875  | 1.0603125  | 1.00472462 | 0.9160367 |
| A_55_P2039 | 7642.5   | Detected | 8005.8   | Detected   | 8341.6  | Detected | 8887.8   | Detected   | Timmdc1       | 1.162944063 | 1.0914753  | 1.11017013 | 1.0419446 |
| A_55_P1979 | 440.7    | Detected | 390.8    | Detected   | 451.8   | Detected | 512.5    | Detected   | Spop          | 1.162922623 | 1.0251872  | 1.31141249 | 1.1560901 |
| A_55_P2010 | 5840.2   | Detected | 4515.1   | Detected   | 5922.4  | Detected | 6791.4   | Detected   | Unk           | 1.162871135 | 1.01407486 | 1.50415273 | 1.3116874 |
| A_55_P2125 | 25.8     | Detected | 10.4     | Not Detect | 18.6    | Detected | 30       | Not Detect | Faah          | 1.162790698 | 0.72093023 | 2.88461538 | 1.7884615 |
| A_55_P1981 | 2450.7   | Detected | 3782.3   | Detected   | 2356    | Detected | 2849.6   | Detected   | Rhox8         | 1.162769821 | 0.96135798 | 0.75340401 | 0.6229014 |
| A_51_P1973 | 65642.2  | Detected | 64524.5  | Detected   | 60756.8 | Detected | 76323.9  | Detected   | CltA          | 1.162726112 | 0.92557532 | 1.18286697 | 0.9416082 |



|            |          |            |          |            |          |            |          |            |               |             |            |            |           |
|------------|----------|------------|----------|------------|----------|------------|----------|------------|---------------|-------------|------------|------------|-----------|
| A_55_P2257 | 20.9     | Detected   | 15.4     | Not Detect | 18.5     | Detected   | 24.3     | Not Detect | 4930455D15Rik | 1.162679426 | 0.88516746 | 1.57792208 | 1.2012987 |
| A_51_P2708 | 1094.9   | Detected   | 977.1    | Detected   | 1400.5   | Detected   | 1273     | Detected   | 1700056E22Rik | 1.162663257 | 1.27911225 | 1.30283492 | 1.4333231 |
| A_51_P3969 | 2716.6   | Detected   | 1991     | Detected   | 2711.7   | Detected   | 3158.4   | Detected   | Zfyve21       | 1.162629758 | 0.99819627 | 1.58633852 | 1.3619789 |
| A_52_P6472 | 28.9     | Detected   | 36.2     | Detected   | 17.8     | Detected   | 33.6     | Not Detect | Asb3          | 1.162629758 | 0.61591696 | 0.9281768  | 0.4917127 |
| A_55_P2065 | 1418.8   | Detected   | 1380.3   | Detected   | 1462.4   | Detected   | 1649.5   | Detected   | Krtap19-5     | 1.162602199 | 1.03073019 | 1.19503007 | 1.0594798 |
| A_51_P3500 | 16946.9  | Detected   | 18966.9  | Detected   | 14956.9  | Detected   | 19701.8  | Detected   | Ndel1         | 1.162560704 | 0.88257439 | 1.03874645 | 0.7885791 |
| A_55_P2344 | 28.3     | Detected   | 23       | Detected   | 14       | Not Detect | 32.9     | Not Detect | E330037G11Rik | 1.16254417  | 0.49469965 | 1.43043478 | 0.6086957 |
| A_55_P2014 | 355.6    | Detected   | 397.1    | Detected   | 521.7    | Detected   | 413.4    | Detected   | 1700092M07Rik | 1.162542182 | 1.46709786 | 1.0410476  | 1.3137749 |
| A_51_P3407 | 28834.7  | Detected   | 28460.8  | Detected   | 33173.5  | Detected   | 33519.4  | Detected   | Prpf31        | 1.162467444 | 1.15047148 | 1.17773921 | 1.1655856 |
| A_66_P1043 | 1816.5   | Detected   | 2214.4   | Detected   | 1877.7   | Detected   | 2111.6   | Detected   | Atxn7l2       | 1.162455271 | 1.03369116 | 0.95357659 | 0.8479498 |
| A_55_P1958 | 17250.6  | Detected   | 21000.7  | Detected   | 20472.8  | Detected   | 20049.6  | Detected   | Stoml2        | 1.162255226 | 1.18678771 | 0.95471103 | 0.9748627 |
| A_55_P2144 | 486.3    | Detected   | 420.7    | Detected   | 582.1    | Detected   | 565.2    | Detected   | C130074G19Rik | 1.162245527 | 1.19699774 | 1.34347516 | 1.3836463 |
| A_51_P1955 | 4400.5   | Detected   | 4273     | Detected   | 4042.7   | Detected   | 5114.4   | Detected   | Dnmt1         | 1.162231565 | 0.91869106 | 1.19691084 | 0.9461034 |
| A_55_P2187 | 1178.2   | Detected   | 1107.6   | Detected   | 1493.9   | Detected   | 1369.3   | Detected   | Cep55         | 1.162196571 | 1.26795111 | 1.23627663 | 1.3487721 |
| A_55_P2063 | 3839.4   | Detected   | 3600.5   | Detected   | 3198.6   | Detected   | 4462.1   | Detected   | Piga          | 1.1621868   | 0.83309892 | 1.2393001  | 0.8883766 |
| A_52_P7812 | 4590.4   | Detected   | 4388.7   | Detected   | 4867.5   | Detected   | 5334.9   | Detected   | Dcaf12        | 1.162186302 | 1.06036511 | 1.21559915 | 1.1090984 |
| A_55_P2123 | 59.2     | Detected   | 54.3     | Detected   | 63.7     | Detected   | 68.8     | Detected   | Arid3b        | 1.162162162 | 1.07601351 | 1.26703499 | 1.1731123 |
| A_55_P2026 | 2755.1   | Detected   | 2727.6   | Detected   | 2520.4   | Detected   | 3201.8   | Detected   | Dlec1         | 1.162135676 | 0.91481253 | 1.17385247 | 0.9240358 |
| A_55_P2126 | 40880.3  | Detected   | 43689.9  | Detected   | 50852.2  | Detected   | 47506.9  | Detected   | Mrps21        | 1.162097636 | 1.24392923 | 1.08736573 | 1.1639349 |
| A_52_P6764 | 574.4    | Detected   | 526.7    | Detected   | 421.3    | Detected   | 667.5    | Detected   | Lpgat1        | 1.162082173 | 0.733461   | 1.26732485 | 0.7998861 |
| A_55_P2178 | 1526.2   | Detected   | 1510.9   | Detected   | 1578.5   | Detected   | 1773.5   | Detected   | U2surp        | 1.16203643  | 1.03426812 | 1.17380369 | 1.0447415 |
| A_52_P5030 | 230.2    | Detected   | 232.8    | Detected   | 212.5    | Detected   | 267.5    | Detected   | Ube2k         | 1.162033015 | 0.92311034 | 1.14905498 | 0.9128007 |
| A_51_P1545 | 3505     | Detected   | 2851.2   | Detected   | 3934.5   | Detected   | 4072.4   | Detected   | Bloc1s5       | 1.161883024 | 1.12253923 | 1.42831089 | 1.3799453 |
| A_55_P2034 | 41667.4  | Detected   | 43118.6  | Detected   | 43581.8  | Detected   | 48411.5  | Detected   | Elavl1        | 1.161855551 | 1.04594479 | 1.12275213 | 1.0107425 |
| A_55_P2093 | 331.3    | Detected   | 325.5    | Detected   | 179.6    | Detected   | 384.9    | Detected   | Arhgef19      | 1.1617869   | 0.54210685 | 1.18248848 | 0.5517665 |
| A_66_P1115 | 13.6     | Not Detect | 13.5     | Not Detect | 17.7     | Detected   | 15.8     | Not Detect | V1ra8         | 1.161764706 | 1.30147059 | 1.17037037 | 1.3111111 |
| A_55_P2114 | 2773     | Detected   | 3538.3   | Detected   | 2631.6   | Detected   | 3221.5   | Detected   | Gcm1          | 1.16173819  | 0.94900829 | 0.91046548 | 0.743747  |
| A_55_P2140 | 7513.5   | Detected   | 6842.5   | Detected   | 4124.4   | Detected   | 8728.7   | Detected   | Tinagl1       | 1.161735543 | 0.54893192 | 1.27565948 | 0.6027621 |
| A_52_P5804 | 6393.2   | Detected   | 4700.4   | Detected   | 6135.3   | Detected   | 7427     | Detected   | Arpc5         | 1.16170306  | 0.95966026 | 1.58007829 | 1.3052719 |
| A_55_P2041 | 56261.2  | Detected   | 38152.9  | Detected   | 54406    | Detected   | 65358.2  | Detected   | Mid1ip1       | 1.16169225  | 0.96702523 | 1.71305982 | 1.4259991 |
| A_66_P1087 | 5891.3   | Detected   | 6949.7   | Detected   | 5877.4   | Detected   | 6843     | Detected   | Rad1          | 1.161543293 | 0.99764059 | 0.98464682 | 0.8457056 |
| A_66_P1175 | 107.1    | Detected   | 106      | Detected   | 108.2    | Detected   | 124.4    | Detected   | Gm5535        | 1.161531279 | 1.01027077 | 1.17358491 | 1.0207547 |
| A_55_P2134 | 15101.3  | Detected   | 18237.8  | Detected   | 11954.5  | Detected   | 17540.2  | Detected   | Amfr          | 1.161502652 | 0.79162059 | 0.96174977 | 0.6554793 |
| A_51_P1904 | 5466.8   | Detected   | 4256.1   | Detected   | 5079.7   | Detected   | 6349.7   | Detected   | Ccdc181       | 1.161502158 | 0.92919075 | 1.49190574 | 1.1935105 |
| A_51_P1160 | 15494.8  | Detected   | 13249.9  | Detected   | 16734.7  | Detected   | 17996.7  | Detected   | Med27         | 1.161467073 | 1.08002039 | 1.35825176 | 1.2630058 |
| A_51_P1733 | 4171.8   | Detected   | 4017     | Detected   | 4336.8   | Detected   | 4845.4   | Detected   | Tada1         | 1.161465075 | 1.03955127 | 1.20622355 | 1.0796117 |
| A_52_P5472 | 7500.6   | Detected   | 6995.1   | Detected   | 9111.3   | Detected   | 8711.4   | Detected   | Tomm70a       | 1.161427086 | 1.21474282 | 1.24535746 | 1.3025261 |
| A_55_P2024 | 783.7    | Detected   | 1083.7   | Detected   | 896.7    | Detected   | 910.2    | Detected   | Rsbm1         | 1.161413806 | 1.14418783 | 0.83990034 | 0.827443  |
| A_55_P2102 | 113094.9 | Detected   | 118192.2 | Detected   | 147710.7 | Detected   | 131348.9 | Detected   | Gm4130        | 1.161404272 | 1.30607746 | 1.11131614 | 1.24975   |
| A_55_P2117 | 60.1     | Detected   | 56.4     | Detected   | 44.6     | Detected   | 69.8     | Detected   | Cep63         | 1.161397671 | 0.74209651 | 1.23758865 | 0.7907801 |

|            |          |            |         |            |          |            |          |            |               |             |            |            |           |
|------------|----------|------------|---------|------------|----------|------------|----------|------------|---------------|-------------|------------|------------|-----------|
| A_51_P5113 | 542.8    | Detected   | 663.8   | Detected   | 462.4    | Detected   | 630.4    | Detected   | D3Ertd254e    | 1.161385409 | 0.85187915 | 0.94968364 | 0.6965954 |
| A_52_P5352 | 2719.6   | Detected   | 2586.9  | Detected   | 2688.9   | Detected   | 3158.5   | Detected   | Syf2          | 1.161384027 | 0.98871158 | 1.22095945 | 1.0394294 |
| A_55_P2067 | 23845.2  | Detected   | 23217.7 | Detected   | 27716.8  | Detected   | 27693.4  | Detected   | Iqsec3        | 1.161382584 | 1.16236391 | 1.19277103 | 1.1937789 |
| A_66_P1117 | 211991.6 | Detected   | 204200  | Detected   | 216819.8 | Detected   | 246203.3 | Detected   | Pgk1          | 1.161382338 | 1.02277543 | 1.20569687 | 1.0618012 |
| A_52_P5427 | 36166.5  | Detected   | 33567.1 | Detected   | 35064.9  | Detected   | 42001.1  | Detected   | 2610507B11Rik | 1.161326089 | 0.96954087 | 1.25125793 | 1.0446211 |
| A_55_P2018 | 65.1     | Detected   | 56.5    | Detected   | 53.5     | Detected   | 75.6     | Detected   | Prpf31        | 1.161290323 | 0.8218126  | 1.3380531  | 0.9469027 |
| A_51_P1148 | 1064.5   | Detected   | 943     | Detected   | 224.1    | Detected   | 1236.1   | Detected   | H1fx          | 1.161202442 | 0.21052137 | 1.31081654 | 0.2376458 |
| A_55_P1955 | 14.9     | Not Detect | 100.7   | Detected   | 4.3      | Not Detect | 17.3     | Not Detect | Grb10         | 1.161073826 | 0.2885906  | 0.17179742 | 0.0427011 |
| A_52_P6566 | 35.4     | Detected   | 27.6    | Detected   | 48       | Detected   | 41.1     | Not Detect | Actn3         | 1.161016949 | 1.3559322  | 1.48913043 | 1.7391304 |
| A_52_P1804 | 10279.8  | Detected   | 12312.4 | Detected   | 11141.9  | Detected   | 11934.4  | Detected   | Bcas2         | 1.160956439 | 1.0838635  | 0.96929924 | 0.9049332 |
| A_65_P1786 | 1072.6   | Detected   | 1068.4  | Detected   | 968.2    | Detected   | 1245.2   | Detected   | Vma21         | 1.160917397 | 0.90266642 | 1.16548109 | 0.9062149 |
| A_51_P1557 | 23       | Detected   | 30.8    | Detected   | 17.8     | Not Detect | 26.7     | Not Detect | Pld6          | 1.160869565 | 0.77391304 | 0.86688312 | 0.5779221 |
| A_55_P2007 | 60.3     | Detected   | 72.5    | Detected   | 76.7     | Detected   | 70       | Detected   | Micu3         | 1.160862355 | 1.27197347 | 0.96551724 | 1.057931  |
| A_55_P2036 | 5307.3   | Detected   | 4351    | Detected   | 5691.2   | Detected   | 6161     | Detected   | Mbd2          | 1.160853918 | 1.07233433 | 1.41599632 | 1.3080211 |
| A_55_P2003 | 328.3    | Detected   | 404.1   | Detected   | 237.9    | Detected   | 381.1    | Detected   | Atrnl1        | 1.160828511 | 0.7246421  | 0.9430834  | 0.5887157 |
| A_55_P1962 | 986.5    | Detected   | 832.2   | Detected   | 844.9    | Detected   | 1145.1   | Detected   | Pigg          | 1.1607704   | 0.85646224 | 1.37599135 | 1.0152608 |
| A_55_P2105 | 22503.6  | Detected   | 17153.6 | Detected   | 15171.6  | Detected   | 26121.4  | Detected   | Trim47        | 1.160765389 | 0.67418546 | 1.52279405 | 0.8844557 |
| A_55_P2065 | 131.3    | Detected   | 101.1   | Detected   | 97.3     | Detected   | 152.4    | Detected   | Snx29         | 1.160700685 | 0.74105103 | 1.5074184  | 0.9624135 |
| A_52_P5782 | 516.2    | Detected   | 485.9   | Detected   | 524.7    | Detected   | 599.1    | Detected   | Tank          | 1.160596668 | 1.01646649 | 1.23296975 | 1.0798518 |
| A_52_P3014 | 1400.5   | Detected   | 1096.8  | Detected   | 1278     | Detected   | 1625.4   | Detected   | Vamp2         | 1.160585505 | 0.91253124 | 1.48194748 | 1.1652079 |
| A_55_P2236 | 538.1    | Detected   | 695     | Detected   | 375.3    | Detected   | 624.5    | Detected   | A430103D13Rik | 1.160564951 | 0.697454   | 0.89856115 | 0.54      |
| A_51_P3271 | 908.9    | Detected   | 825.2   | Detected   | 1000.6   | Detected   | 1054.8   | Detected   | Senp1         | 1.16052371  | 1.10089119 | 1.27823558 | 1.2125545 |
| A_66_P1174 | 2970     | Detected   | 2975.7  | Detected   | 3347.2   | Detected   | 3446.7   | Detected   | Capza1        | 1.160505051 | 1.12700337 | 1.15828208 | 1.1248446 |
| A_55_P1997 | 8.1      | Not Detect | 12.3    | Not Detect | 18.9     | Detected   | 9.4      | Not Detect | Slc6a18       | 1.160493827 | 2.33333333 | 0.76422764 | 1.5365854 |
| A_51_P3145 | 23221.7  | Detected   | 17125.4 | Detected   | 29536.9  | Detected   | 26948.5  | Detected   | Smim11        | 1.16048782  | 1.27195253 | 1.57359828 | 1.7247422 |
| A_55_P2197 | 1181.8   | Detected   | 1187.2  | Detected   | 1353.4   | Detected   | 1371.4   | Detected   | 1500016L03Rik | 1.160433237 | 1.14520223 | 1.15515499 | 1.1399933 |
| A_52_P4814 | 2580.5   | Detected   | 2974.3  | Detected   | 2143.9   | Detected   | 2994.4   | Detected   | Cttnbp2nl     | 1.160395272 | 0.83080798 | 1.00675789 | 0.7208083 |
| A_52_P1522 | 2560.7   | Detected   | 1871.5  | Detected   | 2373.2   | Detected   | 2971.2   | Detected   | Gabpa         | 1.160307728 | 0.92677783 | 1.58760353 | 1.2680737 |
| A_55_P2007 | 1501.9   | Detected   | 1408.6  | Detected   | 1294.1   | Detected   | 1742.6   | Detected   | Scgb1b3       | 1.160263666 | 0.86164192 | 1.23711487 | 0.9187136 |
| A_51_P2440 | 4476.6   | Detected   | 2333.8  | Detected   | 5974.3   | Detected   | 5194     | Detected   | Snapc5        | 1.160255551 | 1.33456194 | 2.22555489 | 2.5599023 |
| A_55_P2157 | 51.2     | Detected   | 53.3    | Detected   | 39.7     | Detected   | 59.4     | Detected   | Gm10866       | 1.16015625  | 0.77539063 | 1.11444653 | 0.7448405 |
| A_66_P1216 | 1290.7   | Detected   | 1320.5  | Detected   | 1254.4   | Detected   | 1497.4   | Detected   | Pcgf1         | 1.160145657 | 0.97187573 | 1.13396441 | 0.9499432 |
| A_55_P2173 | 30.6     | Detected   | 22.1    | Detected   | 20.6     | Detected   | 35.5     | Not Detect | Nfasc         | 1.160130719 | 0.67320261 | 1.60633484 | 0.9321267 |
| A_55_P1985 | 149.3    | Detected   | 131.3   | Detected   | 138.8    | Detected   | 173.2    | Detected   | Shisa7        | 1.160080375 | 0.9296718  | 1.31911653 | 1.0571211 |
| A_51_P3581 | 4746.8   | Detected   | 4197.1  | Detected   | 5237.3   | Detected   | 5506.4   | Detected   | Fads1         | 1.160023595 | 1.10333277 | 1.31195349 | 1.2478378 |
| A_55_P2173 | 638.1    | Detected   | 640.8   | Detected   | 520.7    | Detected   | 740.2    | Detected   | 1700097N02Rik | 1.160006269 | 0.8160163  | 1.1551186  | 0.812578  |
| A_55_P2156 | 65       | Detected   | 85      | Detected   | 58.3     | Detected   | 75.4     | Detected   | Slc10a7       | 1.16        | 0.89692308 | 0.88705882 | 0.6858824 |
| A_55_P2006 | 3612.4   | Detected   | 3330.8  | Detected   | 3441.7   | Detected   | 4190.3   | Detected   | Bmp1          | 1.159976747 | 0.9527461  | 1.25804612 | 1.0332953 |
| A_55_P2106 | 5262.1   | Detected   | 2733.2  | Detected   | 7162.1   | Detected   | 6103.9   | Detected   | Adcy9         | 1.159974155 | 1.36107258 | 2.23324309 | 2.6204083 |
| A_55_P2027 | 837.1    | Detected   | 819.1   | Detected   | 878      | Detected   | 971      | Detected   | Nfx1          | 1.159956994 | 1.04885916 | 1.18544744 | 1.0719082 |

|            |          |            |          |            |          |          |          |            |               |             |            |            |           |
|------------|----------|------------|----------|------------|----------|----------|----------|------------|---------------|-------------|------------|------------|-----------|
| A_55_P2074 | 5403.7   | Detected   | 5416.9   | Detected   | 7229.3   | Detected | 6267     | Detected   | Sdhaf2        | 1.159760905 | 1.33784259 | 1.15693478 | 1.3345825 |
| A_55_P1982 | 351664.3 | Detected   | 415100   | Detected   | 383910.7 | Detected | 407845.9 | Detected   | H2afz         | 1.159759179 | 1.09169654 | 0.98252445 | 0.9248632 |
| A_51_P2392 | 1090     | Detected   | 926.8    | Detected   | 1228.3   | Detected | 1264.1   | Detected   | Bcl2l12       | 1.159724771 | 1.12688073 | 1.36394044 | 1.3253129 |
| A_55_P2012 | 11.9     | Not Detect | 8        | Not Detect | 21.1     | Detected | 13.8     | Not Detect | Tceal7        | 1.159663866 | 1.77310924 | 1.725      | 2.6375    |
| A_55_P1985 | 402.1    | Detected   | 280      | Detected   | 480.6    | Detected | 466.3    | Detected   | C2cd3         | 1.159661776 | 1.19522507 | 1.66535714 | 1.7164286 |
| A_55_P2046 | 1891.8   | Detected   | 1883.9   | Detected   | 2425.3   | Detected | 2193.8   | Detected   | Gata5         | 1.159636325 | 1.28200655 | 1.16449918 | 1.2873826 |
| A_55_P2013 | 25178.9  | Detected   | 17902.4  | Detected   | 27930.6  | Detected | 29197.4  | Detected   | Napa          | 1.159597917 | 1.10928595 | 1.63092099 | 1.5601595 |
| A_55_P2055 | 774.8    | Detected   | 617.7    | Detected   | 633.5    | Detected | 898.4    | Detected   | Arid4a        | 1.159525039 | 0.81763036 | 1.45442772 | 1.0255788 |
| A_55_P1955 | 37       | Detected   | 35.4     | Detected   | 35.2     | Detected | 42.9     | Not Detect | 2810021J22Rik | 1.159459459 | 0.95135135 | 1.21186441 | 0.9943503 |
| A_51_P2167 | 3500.2   | Detected   | 3443.2   | Detected   | 3644.6   | Detected | 4058.2   | Detected   | Eogt          | 1.159419462 | 1.04125479 | 1.17861292 | 1.0584921 |
| A_55_P1965 | 12847.9  | Detected   | 12327.9  | Detected   | 10188.3  | Detected | 14896    | Detected   | Crebbp        | 1.159411266 | 0.79299341 | 1.2083161  | 0.8264425 |
| A_52_P4631 | 132305.2 | Detected   | 137194.5 | Detected   | 156669.2 | Detected | 153396.1 | Detected   | Cdc37         | 1.159410968 | 1.18414998 | 1.1180922  | 1.1419496 |
| A_55_P1973 | 8756.7   | Detected   | 7900.8   | Detected   | 10894.7  | Detected | 10152.1  | Detected   | Haus5         | 1.159352267 | 1.2441559  | 1.28494583 | 1.3789363 |
| A_55_P2120 | 40.8     | Detected   | 19.2     | Detected   | 26.4     | Detected | 47.3     | Detected   | Vsig10l       | 1.159313725 | 0.64705882 | 2.46354167 | 1.375     |
| A_55_P1990 | 6875.2   | Detected   | 6618     | Detected   | 7231.3   | Detected | 7970.3   | Detected   | R3hdm1        | 1.159282639 | 1.05179486 | 1.20433666 | 1.0926715 |
| A_55_P2057 | 1334.9   | Detected   | 655.6    | Detected   | 1330.5   | Detected | 1547.5   | Detected   | Cpt1a         | 1.159262866 | 0.99670387 | 2.36043319 | 2.0294387 |
| A_55_P1973 | 32192.9  | Detected   | 40370.8  | Detected   | 42410.7  | Detected | 37318.8  | Detected   | Htra2         | 1.15922455  | 1.31739297 | 0.9244008  | 1.0505291 |
| A_55_P2033 | 20.1     | Detected   | 23.4     | Detected   | 21.1     | Detected | 23.3     | Not Detect | Nkain2        | 1.15920398  | 1.04975124 | 0.9957265  | 0.9017094 |
| A_66_P1039 | 1751.5   | Detected   | 1622.3   | Detected   | 1359     | Detected | 2030.3   | Detected   | Bbs7          | 1.159177848 | 0.77590637 | 1.25149479 | 0.8376996 |
| A_55_P1992 | 4958.1   | Detected   | 4116.4   | Detected   | 5479.5   | Detected | 5747.2   | Detected   | Kdelr1        | 1.159153708 | 1.10516125 | 1.39617141 | 1.3311389 |
| A_51_P3204 | 10443.7  | Detected   | 9054.6   | Detected   | 10585.1  | Detected | 12105.7  | Detected   | Rab24         | 1.159139002 | 1.01353926 | 1.33696685 | 1.1690301 |
| A_55_P1994 | 1473.6   | Detected   | 1203.6   | Detected   | 2127.3   | Detected | 1708.1   | Detected   | Mkl1          | 1.159134093 | 1.44360749 | 1.41915919 | 1.7674477 |
| A_55_P2062 | 806.9    | Detected   | 863.6    | Detected   | 747.9    | Detected | 935.3    | Detected   | Zfp941        | 1.159127525 | 0.92688065 | 1.08302455 | 0.8660259 |
| A_55_P2094 | 11557    | Detected   | 11689.4  | Detected   | 13445.9  | Detected | 13395.7  | Detected   | Kdr           | 1.159098382 | 1.16344207 | 1.14596985 | 1.1502643 |
| A_51_P1438 | 2528     | Detected   | 1933     | Detected   | 2619.7   | Detected | 2930.1   | Detected   | Tmem42        | 1.159058544 | 1.03627373 | 1.51583032 | 1.3552509 |
| A_51_P3278 | 34197    | Detected   | 31299.2  | Detected   | 41842.6  | Detected | 39636.3  | Detected   | Ppib          | 1.159057812 | 1.22357517 | 1.26636783 | 1.3368585 |
| A_51_P1098 | 24614.4  | Detected   | 22071.8  | Detected   | 31954.7  | Detected | 28528.5  | Detected   | Uqcrc1        | 1.159016673 | 1.29821162 | 1.29253165 | 1.4477614 |
| A_55_P2183 | 504.6    | Detected   | 521.3    | Detected   | 451.5    | Detected | 584.8    | Detected   | Mknk1         | 1.158937772 | 0.89476813 | 1.12181086 | 0.866104  |
| A_51_P2782 | 85.6     | Detected   | 78.9     | Detected   | 96.7     | Detected | 99.2     | Detected   | Hinfp         | 1.158878505 | 1.1296729  | 1.25728771 | 1.225602  |
| A_55_P2115 | 2357.2   | Detected   | 2427.4   | Detected   | 2405.4   | Detected | 2731.5   | Detected   | Sike1         | 1.15879009  | 1.02044799 | 1.12527808 | 0.9909368 |
| A_55_P2064 | 548.6    | Detected   | 416.9    | Detected   | 465.3    | Detected | 635.7    | Detected   | Anks1         | 1.158767773 | 0.84815895 | 1.5248261  | 1.116095  |
| A_55_P1961 | 3260.9   | Detected   | 3235.4   | Detected   | 3440.2   | Detected | 3778.5   | Detected   | Tmem194       | 1.158729185 | 1.05498482 | 1.16786178 | 1.0632997 |
| A_55_P2064 | 33825.5  | Detected   | 33448.3  | Detected   | 29103.6  | Detected | 39194.3  | Detected   | Cnot6         | 1.158720492 | 0.86040413 | 1.1717875  | 0.870107  |
| A_51_P3695 | 16702.6  | Detected   | 11134.7  | Detected   | 19438.9  | Detected | 19350.7  | Detected   | Nudt16l1      | 1.158544179 | 1.16382479 | 1.73787349 | 1.7457947 |
| A_55_P2079 | 100.3    | Detected   | 111.2    | Detected   | 108.6    | Detected | 116.2    | Detected   | Gm14340       | 1.158524427 | 1.08275174 | 1.04496403 | 0.9766187 |
| A_55_P1983 | 2559.4   | Detected   | 2522     | Detected   | 2408.7   | Detected | 2964.9   | Detected   | Tdrd3         | 1.158435571 | 0.94111901 | 1.17561459 | 0.9550753 |
| A_52_P4674 | 310.7    | Detected   | 354.2    | Detected   | 465.4    | Detected | 359.9    | Detected   | Dffb          | 1.158352108 | 1.49790795 | 1.0160926  | 1.3139469 |
| A_55_P1973 | 104.2    | Detected   | 118.2    | Detected   | 125.1    | Detected | 120.7    | Detected   | Ksr1          | 1.158349328 | 1.20057582 | 1.02115059 | 1.0583756 |
| A_55_P1991 | 124137.7 | Detected   | 145550.8 | Detected   | 127673.5 | Detected | 143779.6 | Detected   | Rpl13         | 1.158226711 | 1.02848289 | 0.98783105 | 0.8771748 |
| A_55_P2072 | 763.5    | Detected   | 793.8    | Detected   | 785.5    | Detected | 884.3    | Detected   | Kansl1        | 1.15821873  | 1.02881467 | 1.11400857 | 0.989544  |

|            |         |          |         |            |         |            |         |            |               |             |            |            |           |
|------------|---------|----------|---------|------------|---------|------------|---------|------------|---------------|-------------|------------|------------|-----------|
| A_51_P3263 | 6874.3  | Detected | 5917    | Detected   | 7295.6  | Detected   | 7961.7  | Detected   | Gapvd1        | 1.158183379 | 1.06128624 | 1.34556363 | 1.2329897 |
| A_55_P2071 | 10357   | Detected | 12799.3 | Detected   | 9440.6  | Detected   | 11995   | Detected   | Rnf126        | 1.158153906 | 0.91151878 | 0.93716063 | 0.7375872 |
| A_51_P1555 | 120.8   | Detected | 129.4   | Detected   | 129.3   | Detected   | 139.9   | Detected   | Klk1b8        | 1.158112583 | 1.07036424 | 1.08114374 | 0.9992272 |
| A_66_P1137 | 679.9   | Detected | 430.9   | Detected   | 839.8   | Detected   | 787.4   | Detected   | Acvr2a        | 1.158111487 | 1.23518164 | 1.82733813 | 1.9489441 |
| A_52_P6280 | 40015.5 | Detected | 39883.7 | Detected   | 48501.9 | Detected   | 46341.3 | Detected   | Cdca3         | 1.158083743 | 1.21207782 | 1.16191076 | 1.2160833 |
| A_51_P1672 | 187.3   | Detected | 174.4   | Detected   | 346.7   | Detected   | 216.9   | Detected   | Chi3l3        | 1.158035238 | 1.85104111 | 1.24369266 | 1.9879587 |
| A_55_P2003 | 4671.3  | Detected | 4683.7  | Detected   | 5767.2  | Detected   | 5409.1  | Detected   | Clint1        | 1.157943185 | 1.23460279 | 1.15487755 | 1.2313342 |
| A_55_P2000 | 50758.2 | Detected | 43734.7 | Detected   | 53795.1 | Detected   | 58771   | Detected   | Arpc5         | 1.157862178 | 1.05983073 | 1.34380709 | 1.2300324 |
| A_51_P1204 | 6220.9  | Detected | 6349.9  | Detected   | 6013.1  | Detected   | 7202.3  | Detected   | Mina          | 1.157758524 | 0.96659647 | 1.13423833 | 0.9469598 |
| A_51_P4607 | 6712.8  | Detected | 5437.2  | Detected   | 9308.1  | Detected   | 7771.4  | Detected   | Prkcd         | 1.157698725 | 1.38661959 | 1.42930185 | 1.7119289 |
| A_51_P3711 | 34491.5 | Detected | 29726.8 | Detected   | 32511   | Detected   | 39930.6 | Detected   | Cops4         | 1.157693925 | 0.94258006 | 1.34325255 | 1.0936596 |
| A_51_P1480 | 3515.1  | Detected | 3542.4  | Detected   | 2263.5  | Detected   | 4069.4  | Detected   | Sh3pxd2b      | 1.157691104 | 0.64393616 | 1.1487692  | 0.6389736 |
| A_55_P1970 | 34.9    | Detected | 24.4    | Detected   | 27.6    | Detected   | 40.4    | Not Detect | Slc16a14      | 1.157593123 | 0.79083095 | 1.6557377  | 1.1311475 |
| A_52_P3105 | 2380.9  | Detected | 3460.3  | Detected   | 2466.5  | Detected   | 2755.9  | Detected   | Rbfox2        | 1.157503465 | 1.03595279 | 0.79643384 | 0.7127995 |
| A_55_P1978 | 636.2   | Detected | 574.3   | Detected   | 528.5   | Detected   | 736.3   | Detected   | Obp1a         | 1.157340459 | 0.83071361 | 1.28208254 | 0.9202507 |
| A_52_P2243 | 612.9   | Detected | 624.6   | Detected   | 638.4   | Detected   | 709.3   | Detected   | Ubox5         | 1.157285038 | 1.04160548 | 1.13560679 | 1.0220941 |
| A_55_P2045 | 19653.2 | Detected | 11325.9 | Detected   | 17626.2 | Detected   | 22743.6 | Detected   | Mgrn1         | 1.157246657 | 0.89686158 | 2.00810532 | 1.5562737 |
| A_55_P2077 | 936.3   | Detected | 878     | Detected   | 1337.9  | Detected   | 1083.5  | Detected   | Malt1         | 1.157214568 | 1.42892235 | 1.23405467 | 1.5238041 |
| A_52_P5099 | 14      | Detected | 12      | Not Detect | 19.6    | Detected   | 16.2    | Not Detect | Ager          | 1.157142857 | 1.4        | 1.35       | 1.6333333 |
| A_55_P2206 | 141.3   | Detected | 168.7   | Detected   | 125.2   | Detected   | 163.5   | Detected   | LOC627096     | 1.157112527 | 0.88605803 | 0.96917605 | 0.7421458 |
| A_55_P1989 | 438     | Detected | 596.5   | Detected   | 384.6   | Detected   | 506.8   | Detected   | Gcm1          | 1.157077626 | 0.87808219 | 0.8496228  | 0.6447611 |
| A_55_P2288 | 23.6    | Detected | 19.2    | Detected   | 19.7    | Detected   | 27.3    | Not Detect | AI852580      | 1.156779661 | 0.83474576 | 1.421875   | 1.0260417 |
| A_55_P2132 | 97      | Detected | 86.9    | Detected   | 74.8    | Detected   | 112.2   | Detected   | 1600023N17Rik | 1.156701031 | 0.77113402 | 1.29113924 | 0.8607595 |
| A_51_P4093 | 38.3    | Detected | 35.4    | Detected   | 29.5    | Detected   | 44.3    | Not Detect | Bpifb6        | 1.156657963 | 0.77023499 | 1.25141243 | 0.8333333 |
| A_52_P8078 | 24.9    | Detected | 24      | Detected   | 12.2    | Not Detect | 28.8    | Not Detect | A630038E17Rik | 1.156626506 | 0.48995984 | 1.2        | 0.5083333 |
| A_55_P2178 | 70.9    | Detected | 50.2    | Detected   | 65.5    | Detected   | 82      | Detected   | Gja5          | 1.156558533 | 0.92383639 | 1.63346614 | 1.3047809 |
| A_55_P1967 | 14421.4 | Detected | 11070.8 | Detected   | 12244.7 | Detected   | 16678   | Detected   | Ppp1r9b       | 1.156475793 | 0.84906458 | 1.50648553 | 1.1060357 |
| A_66_P1289 | 234.6   | Detected | 308.4   | Detected   | 116.5   | Detected   | 271.3   | Detected   | Gm6306        | 1.156436488 | 0.49658994 | 0.87970169 | 0.3777562 |
| A_55_P2157 | 13004.9 | Detected | 13315.6 | Detected   | 16960.6 | Detected   | 15038.6 | Detected   | Srsf5         | 1.156379518 | 1.30416997 | 1.1293971  | 1.2737391 |
| A_52_P4030 | 299.3   | Detected | 230     | Detected   | 267.1   | Detected   | 346.1   | Detected   | Xrn1          | 1.156364851 | 0.89241564 | 1.50478261 | 1.1613043 |
| A_52_P3518 | 2377.1  | Detected | 3296.2  | Detected   | 1956.8  | Detected   | 2748.6  | Detected   | Itgb1         | 1.156282866 | 0.82318792 | 0.8338693  | 0.5936533 |
| A_55_P1986 | 396.9   | Detected | 395.9   | Detected   | 335.2   | Detected   | 458.9   | Detected   | Gm19668       | 1.156210632 | 0.84454523 | 1.15913109 | 0.8466785 |
| A_51_P1628 | 36.5    | Detected | 51.2    | Detected   | 41.5    | Detected   | 42.2    | Not Detect | 4933405L10Rik | 1.156164384 | 1.1369863  | 0.82421875 | 0.8105469 |
| A_52_P2739 | 14123   | Detected | 13832.8 | Detected   | 16876.5 | Detected   | 16328.4 | Detected   | Mrpl17        | 1.156156624 | 1.19496566 | 1.18041177 | 1.220035  |
| A_55_P2200 | 9143.5  | Detected | 8568.7  | Detected   | 9977.1  | Detected   | 10571.1 | Detected   | 4733401D01Rik | 1.156132772 | 1.09116859 | 1.23368772 | 1.1643657 |
| A_52_P5170 | 13934.3 | Detected | 15741.6 | Detected   | 15401.9 | Detected   | 16109.9 | Detected   | Rpf1          | 1.156132708 | 1.10532284 | 1.02339661 | 0.9784202 |
| A_55_P2113 | 23025.7 | Detected | 25756.3 | Detected   | 23826.7 | Detected   | 26620   | Detected   | Snrpa1        | 1.156099489 | 1.03478722 | 1.03353354 | 0.9250824 |
| A_51_P4833 | 3358.7  | Detected | 3752.5  | Detected   | 3414    | Detected   | 3882.8  | Detected   | Rnaseh1       | 1.156042516 | 1.0164647  | 1.03472352 | 0.9097935 |
| A_55_P2017 | 50423.6 | Detected | 52812.6 | Detected   | 66636.9 | Detected   | 58290.8 | Detected   | Rpsa          | 1.15602218  | 1.3215419  | 1.10372903 | 1.2617614 |
| A_51_P3667 | 46.8    | Detected | 60.4    | Detected   | 48.2    | Detected   | 54.1    | Detected   | Rims1         | 1.155982906 | 1.02991453 | 0.89569536 | 0.7980132 |

|            |          |            |          |            |          |            |          |            |               |             |            |            |           |
|------------|----------|------------|----------|------------|----------|------------|----------|------------|---------------|-------------|------------|------------|-----------|
| A_55_P2082 | 2483.7   | Detected   | 2615.8   | Detected   | 3122.7   | Detected   | 2871.1   | Detected   | Wars          | 1.15597697  | 1.25727745 | 1.0975992  | 1.1937839 |
| A_51_P1320 | 717      | Detected   | 595.5    | Detected   | 777.3    | Detected   | 828.8    | Detected   | Rsl1          | 1.155927476 | 1.08410042 | 1.39177162 | 1.3052897 |
| A_52_P5737 | 225.9    | Detected   | 267.4    | Detected   | 195.7    | Detected   | 261.1    | Detected   | Rrm2b         | 1.15582116  | 0.86631253 | 0.97643979 | 0.7318624 |
| A_51_P3724 | 21921.2  | Detected   | 25092.4  | Detected   | 21284.8  | Detected   | 25334.3  | Detected   | Fxr1          | 1.155698593 | 0.97096874 | 1.00964037 | 0.8482568 |
| A_55_P2082 | 10484.5  | Detected   | 11587.3  | Detected   | 11252.4  | Detected   | 12116.7  | Detected   | Irak2         | 1.155677429 | 1.07324145 | 1.04568795 | 0.9710977 |
| A_51_P1343 | 14672.6  | Detected   | 16849.2  | Detected   | 19427    | Detected   | 16956.7  | Detected   | Pfdn5         | 1.155671115 | 1.32403255 | 1.00638012 | 1.1529924 |
| A_65_P2068 | 898.1    | Detected   | 872      | Detected   | 1115.2   | Detected   | 1037.9   | Detected   | Gm1070        | 1.155661953 | 1.24173255 | 1.19025229 | 1.2788991 |
| A_51_P1564 | 7731.8   | Detected   | 7324.7   | Detected   | 6744.9   | Detected   | 8935     | Detected   | Slc25a33      | 1.155617062 | 0.87235831 | 1.21984518 | 0.9208432 |
| A_55_P2388 | 23.8     | Detected   | 14.1     | Not Detect | 13.2     | Not Detect | 27.5     | Not Detect | C430019N01Rik | 1.155462185 | 0.55462185 | 1.95035461 | 0.9361702 |
| A_55_P1957 | 216.8    | Detected   | 179.4    | Detected   | 181.4    | Detected   | 250.5    | Detected   | D14ErtD670e   | 1.155442804 | 0.83671587 | 1.39632107 | 1.0111483 |
| A_55_P2166 | 4850.8   | Detected   | 4868     | Detected   | 6826.1   | Detected   | 5604     | Detected   | 1700011J10Rik | 1.155273357 | 1.40721118 | 1.15119145 | 1.4022391 |
| A_52_P1013 | 843.8    | Detected   | 1022.3   | Detected   | 1130.8   | Detected   | 974.8    | Detected   | Sap18         | 1.155250059 | 1.34012799 | 0.95353614 | 1.1061332 |
| A_55_P2022 | 21776.5  | Detected   | 19858.8  | Detected   | 17667.7  | Detected   | 25154.4  | Detected   | Cdk11b        | 1.155116754 | 0.81131954 | 1.26666264 | 0.889666  |
| A_55_P2173 | 50.3     | Detected   | 66.4     | Detected   | 59.9     | Detected   | 58.1     | Detected   | A230070E04Rik | 1.155069583 | 1.19085487 | 0.875      | 0.9021084 |
| A_51_P2651 | 1432.5   | Detected   | 1769.6   | Detected   | 1607.8   | Detected   | 1654.6   | Detected   | Dlat          | 1.15504363  | 1.12237347 | 0.93501356 | 0.9085669 |
| A_51_P2367 | 354.1    | Detected   | 331.3    | Detected   | 300.2    | Detected   | 409      | Detected   | Dlx6as2       | 1.155040949 | 0.84778311 | 1.23453064 | 0.9061274 |
| A_55_P2059 | 245.8    | Detected   | 175.7    | Detected   | 380.5    | Detected   | 283.9    | Detected   | Ppip5k2       | 1.155004068 | 1.54800651 | 1.61582242 | 2.1656232 |
| A_55_P1973 | 4301.4   | Detected   | 4463.3   | Detected   | 5284.9   | Detected   | 4967.9   | Detected   | Pex11b        | 1.154949551 | 1.22864649 | 1.11305536 | 1.184079  |
| A_51_P2451 | 7.1      | Not Detect | 7.3      | Not Detect | 375.8    | Detected   | 8.2      | Not Detect | Gdf2          | 1.154929577 | 52.9295775 | 1.12328767 | 51.479452 |
| A_51_P4165 | 52254.9  | Detected   | 82012.8  | Detected   | 62447.4  | Detected   | 60350.5  | Detected   | Ssr3          | 1.154925184 | 1.19505348 | 0.73586684 | 0.7614348 |
| A_51_P5132 | 1491.9   | Detected   | 1156.7   | Detected   | 1346.6   | Detected   | 1723     | Detected   | Cep164        | 1.154903144 | 0.90260741 | 1.48958243 | 1.1641739 |
| A_55_P1989 | 1406.4   | Detected   | 1458.3   | Detected   | 1608.2   | Detected   | 1624.2   | Detected   | Mynn          | 1.154863481 | 1.14348692 | 1.1137626  | 1.1027909 |
| A_55_P2110 | 137.7    | Detected   | 144.9    | Detected   | 136.3    | Detected   | 159      | Detected   | Flrt1         | 1.154684096 | 0.98983297 | 1.09730849 | 0.9406487 |
| A_55_P2307 | 83.4     | Detected   | 90.1     | Detected   | 50.4     | Detected   | 96.3     | Detected   | D130051D11Rik | 1.154676259 | 0.60431655 | 1.06881243 | 0.5593785 |
| A_52_P2367 | 100.9    | Detected   | 65.3     | Detected   | 300      | Detected   | 116.5    | Detected   | Setd3         | 1.154608523 | 2.97324083 | 1.78407351 | 4.5941807 |
| A_55_P2150 | 4125.7   | Detected   | 3933.3   | Detected   | 3910.3   | Detected   | 4763.5   | Detected   | E030030I06Rik | 1.154591948 | 0.94779068 | 1.21106959 | 0.9941525 |
| A_55_P2018 | 4515     | Detected   | 3979.9   | Detected   | 4279.7   | Detected   | 5211.9   | Detected   | Snx27         | 1.154352159 | 0.94788483 | 1.30955552 | 1.0753285 |
| A_51_P3359 | 154046   | Detected   | 134114.9 | Detected   | 181844.7 | Detected   | 177815   | Detected   | Cox5a         | 1.154298067 | 1.18045714 | 1.32584075 | 1.3558874 |
| A_51_P3461 | 20020.9  | Detected   | 22344.8  | Detected   | 22999.4  | Detected   | 23109.4  | Detected   | Sgta          | 1.154263794 | 1.14876954 | 1.03421825 | 1.0292954 |
| A_55_P2002 | 9556.9   | Detected   | 10529.9  | Detected   | 14384.9  | Detected   | 11031    | Detected   | Sumo3         | 1.154244577 | 1.50518474 | 1.0475883  | 1.3661003 |
| A_55_P1974 | 4355.1   | Detected   | 4687.3   | Detected   | 4881.4   | Detected   | 5026.7   | Detected   | Surf6         | 1.154210007 | 1.12084682 | 1.07240842 | 1.0414098 |
| A_52_P1108 | 784.8    | Detected   | 946.3    | Detected   | 1977.5   | Detected   | 905.8    | Detected   | Ggcx          | 1.154179409 | 2.51975025 | 0.95720173 | 2.0897178 |
| A_52_P4077 | 39331.2  | Detected   | 44918    | Detected   | 40340.3  | Detected   | 45391.4  | Detected   | Mdh1          | 1.154081238 | 1.02565648 | 1.0105392  | 0.8980876 |
| A_55_P1955 | 16240    | Detected   | 15178.6  | Detected   | 12970.6  | Detected   | 18741.8  | Detected   | Ap5z1         | 1.154051724 | 0.79868227 | 1.23475156 | 0.854532  |
| A_52_P5901 | 1915.7   | Detected   | 1922.8   | Detected   | 2010.8   | Detected   | 2210.7   | Detected   | Saal1         | 1.153990708 | 1.04964243 | 1.14972956 | 1.0457666 |
| A_55_P2181 | 348.8    | Detected   | 403.9    | Detected   | 374.1    | Detected   | 402.5    | Detected   | Cd164I2       | 1.153956422 | 1.0725344  | 0.9965338  | 0.9262194 |
| A_66_P1404 | 7957.4   | Detected   | 10857.1  | Detected   | 7995.4   | Detected   | 9182.3   | Detected   | D8ErtD738e    | 1.153932189 | 1.00477543 | 0.8457415  | 0.7364213 |
| A_55_P2163 | 1325.5   | Detected   | 1200.8   | Detected   | 1396.6   | Detected   | 1529.5   | Detected   | Foxm1         | 1.153904187 | 1.05364014 | 1.27373418 | 1.163058  |
| A_55_P2283 | 314.5    | Detected   | 260.6    | Detected   | 340.5    | Detected   | 362.9    | Detected   | Maz           | 1.153895072 | 1.08267091 | 1.39255564 | 1.3066002 |
| A_55_P2033 | 283230.3 | Detected   | 314842.5 | Detected   | 278609.9 | Detected   | 326811.7 | Detected   | Gm5528        | 1.153872661 | 0.98368677 | 1.03801647 | 0.8849183 |

|            |                  |                  |                  |                  |               |             |            |            |           |
|------------|------------------|------------------|------------------|------------------|---------------|-------------|------------|------------|-----------|
| A_55_P1987 | 23.4 Detected    | 19.8 Detected    | 15.1 Not Detect  | 27 Not Detect    | Pla2g4d       | 1.153846154 | 0.64529915 | 1.36363636 | 0.7626263 |
| A_51_P1250 | 7.8 Not Detect   | 13.2 Not Detect  | 39.7 Detected    | 9 Not Detect     | Oxct2a        | 1.153846154 | 5.08974359 | 0.68181818 | 3.0075758 |
| A_52_P5152 | 1046.1 Detected  | 1214.1 Detected  | 791.4 Detected   | 1207 Detected    | 1110051M20Rik | 1.153809387 | 0.75652423 | 0.99415205 | 0.6518409 |
| A_55_P1977 | 13938.1 Detected | 14365.4 Detected | 12760 Detected   | 16081.6 Detected | Epc2          | 1.153787102 | 0.91547628 | 1.11946761 | 0.8882454 |
| A_51_P1839 | 13300.5 Detected | 11115 Detected   | 14747.5 Detected | 15345.6 Detected | Paf1          | 1.153761137 | 1.1087929  | 1.38062078 | 1.3268106 |
| A_55_P1981 | 130.1 Detected   | 117.4 Detected   | 122.5 Detected   | 150.1 Detected   | Hbb-bh2       | 1.153727902 | 0.9415834  | 1.27853492 | 1.0434412 |
| A_55_P2274 | 34455.2 Detected | 28474.3 Detected | 20668.7 Detected | 39750.6 Detected | Agap3         | 1.153689429 | 0.59987172 | 1.39601676 | 0.7258721 |
| A_51_P3363 | 3194.2 Detected  | 4317.2 Detected  | 3262.8 Detected  | 3684.8 Detected  | Tmem18        | 1.153590883 | 1.02147643 | 0.85351617 | 0.7557676 |
| A_51_P1880 | 20977.2 Detected | 17584.2 Detected | 24444.6 Detected | 24199 Detected   | Dnajb11       | 1.153585798 | 1.16529375 | 1.37617861 | 1.3901457 |
| A_55_P2182 | 747 Detected     | 741.6 Detected   | 823.3 Detected   | 861.7 Detected   | Arl16         | 1.153547523 | 1.1021419  | 1.16194714 | 1.1101672 |
| A_55_P1970 | 45.6 Detected    | 49.3 Detected    | 62.1 Detected    | 52.6 Detected    | Il12rb2       | 1.153508772 | 1.36184211 | 1.06693712 | 1.2596349 |
| A_55_P1965 | 14736.7 Detected | 12618 Detected   | 14686.1 Detected | 16998.8 Detected | Trnau1ap      | 1.153501123 | 0.9965664  | 1.34718656 | 1.1639008 |
| A_55_P2006 | 215.7 Detected   | 173.3 Detected   | 217 Detected     | 248.8 Detected   | Lyzl6         | 1.153453871 | 1.00602689 | 1.4356607  | 1.2521639 |
| A_55_P1971 | 36.5 Detected    | 38.9 Detected    | 66 Detected      | 42.1 Not Detect  | Cr2           | 1.153424658 | 1.80821918 | 1.08226221 | 1.6966581 |
| A_51_P1636 | 2270.7 Detected  | 2341.3 Detected  | 1916.5 Detected  | 2619 Detected    | Rufy1         | 1.153388823 | 0.84401286 | 1.11860932 | 0.8185623 |
| A_51_P3951 | 4852.4 Detected  | 3609.2 Detected  | 7678.3 Detected  | 5596.7 Detected  | Nme3          | 1.153388014 | 1.58237161 | 1.55067605 | 2.1274244 |
| A_55_P2354 | 960.1 Detected   | 644.5 Detected   | 1557.8 Detected  | 1107.3 Detected  | 2610029K11Rik | 1.153317363 | 1.62253932 | 1.71807603 | 2.4170675 |
| A_55_P2117 | 6958.2 Detected  | 4360.5 Detected  | 6067 Detected    | 8024.8 Detected  | Acap2         | 1.15328677  | 0.8719209  | 1.84033941 | 1.3913542 |
| A_55_P2060 | 130.5 Detected   | 88.2 Detected    | 97 Detected      | 150.5 Detected   | Krtap5-5      | 1.153256705 | 0.74329502 | 1.70634921 | 1.0997732 |
| A_51_P4077 | 89.4 Detected    | 94 Detected      | 91.5 Detected    | 103.1 Detected   | Srcap         | 1.153243848 | 1.02348993 | 1.09680851 | 0.9734043 |
| A_55_P2086 | 75.7 Detected    | 64.3 Detected    | 83.8 Detected    | 87.3 Detected    | Arhgap19      | 1.15323646  | 1.10700132 | 1.35769829 | 1.3032659 |
| A_55_P1996 | 13566.8 Detected | 12411.3 Detected | 12130.9 Detected | 15645.6 Detected | Pcgf5         | 1.153226995 | 0.89416075 | 1.26059317 | 0.9774077 |
| A_51_P5106 | 1493.6 Detected  | 1545 Detected    | 1891.6 Detected  | 1722.4 Detected  | Supt3         | 1.153186931 | 1.26647027 | 1.11482201 | 1.2243366 |
| A_55_P2083 | 197.8 Detected   | 201.5 Detected   | 211.6 Detected   | 228.1 Detected   | Rps6kc1       | 1.153185035 | 1.06976744 | 1.13200993 | 1.0501241 |
| A_52_P1076 | 217.4 Detected   | 214.7 Detected   | 160.7 Detected   | 250.7 Detected   | LOC101056632  | 1.153173873 | 0.73919043 | 1.16767583 | 0.7484863 |
| A_55_P2083 | 249.4 Detected   | 253.2 Detected   | 196.3 Detected   | 287.6 Detected   | Cyp4f18       | 1.153167602 | 0.78708901 | 1.13586098 | 0.7752765 |
| A_55_P2105 | 19052.7 Detected | 23362.8 Detected | 20672 Detected   | 21968.7 Detected | Acin1         | 1.153049174 | 1.08499058 | 0.94032821 | 0.8848254 |
| A_55_P1978 | 17702 Detected   | 19391 Detected   | 14317.3 Detected | 20410.9 Detected | Dtx2          | 1.153027906 | 0.80879562 | 1.05259657 | 0.7383477 |
| A_66_P1249 | 35925.3 Detected | 34091.4 Detected | 39620.7 Detected | 41422.3 Detected | Pdcd5         | 1.153011944 | 1.10286344 | 1.21503664 | 1.1621905 |
| A_51_P3439 | 19214.5 Detected | 16881.9 Detected | 18171.4 Detected | 22154.3 Detected | Xrcc1         | 1.152999037 | 0.94571287 | 1.31231082 | 1.0763836 |
| A_52_P7355 | 1807.7 Detected  | 1583.7 Detected  | 2024.7 Detected  | 2084.2 Detected  | Gm7241        | 1.152956796 | 1.12004204 | 1.31603208 | 1.2784618 |
| A_51_P1326 | 17 Detected      | 20 Detected      | 19.3 Detected    | 19.6 Not Detect  | Alpl2         | 1.152941176 | 1.13529412 | 0.98       | 0.965     |
| A_55_P2040 | 39123.7 Detected | 37314.5 Detected | 49138.9 Detected | 45104.2 Detected | Bola2         | 1.152861309 | 1.25598806 | 1.20875799 | 1.3168849 |
| A_55_P2174 | 511.8 Detected   | 701.1 Detected   | 505.7 Detected   | 590 Detected     | Akap7         | 1.15279406  | 0.98808128 | 0.84153473 | 0.7212951 |
| A_55_P2053 | 13138.1 Detected | 9629.5 Detected  | 15584.4 Detected | 15145.4 Detected | Poc1a         | 1.152784649 | 1.18619892 | 1.57281271 | 1.6184018 |
| A_51_P3123 | 9771.5 Detected  | 10518.6 Detected | 10495.5 Detected | 11264.3 Detected | Mtbp          | 1.152770813 | 1.07409303 | 1.07089346 | 0.9978039 |
| A_55_P2039 | 7883.3 Detected  | 6831.7 Detected  | 8225 Detected    | 9087.6 Detected  | Wsb2          | 1.152765974 | 1.04334479 | 1.33021064 | 1.2039463 |
| A_55_P2010 | 12983.5 Detected | 13578.3 Detected | 14635.9 Detected | 14966.9 Detected | Surf6         | 1.152763122 | 1.12726923 | 1.10226612 | 1.077889  |
| A_55_P2109 | 15670.8 Detected | 13711.2 Detected | 16954 Detected   | 18064.6 Detected | Gtf3c5        | 1.152755443 | 1.08188478 | 1.31750686 | 1.2365074 |
| A_52_P4231 | 12941.3 Detected | 14297.7 Detected | 13046.4 Detected | 14917.5 Detected | Arglu1        | 1.152704906 | 1.00812129 | 1.04334963 | 0.9124824 |

|            |                   |                   |                   |                   |               |             |             |            |            |           |
|------------|-------------------|-------------------|-------------------|-------------------|---------------|-------------|-------------|------------|------------|-----------|
| A_55_P1999 | 26.2 Detected     | 11.8 Not Detect   | 21.7 Detected     | 30.2 Not Detect   | Gm10325       | 1.152671756 | 0.82824427  | 2.55932203 | 1.8389831  |           |
| A_52_P6791 | 3299.5 Detected   | 3290.7 Detected   | 3328.2 Detected   | 3803 Detected     | Clk1          | 1.152598879 | 1.00869829  | 1.15568116 | 1.0113958  |           |
| A_55_P2044 | 13805.3 Detected  | 12673.2 Detected  | 12840 Detected    | 15911.8 Detected  | Lst1          | 1.152586326 | 0.93007758  | 1.25554714 | 1.0131616  |           |
| A_55_P2101 | 57.7 Detected     | 47.9 Detected     | 46.4 Detected     | 66.5 Detected     | Zfp112        | 1.152512998 | 0.80415945  | 1.38830898 | 0.9686848  |           |
| A_51_P2467 | 2452.2 Detected   | 1761.2 Detected   | 3376.3 Detected   | 2826 Detected     | Sesn3         | 1.152434549 | 1.37684528  | 1.60458778 | 1.9170452  |           |
| A_52_P6279 | 970.8 Detected    | 1199.5 Detected   | 904.4 Detected    | 1118.6 Detected   | Usp36         | 1.152245571 | 0.9316028   | 0.93255523 | 0.7539808  |           |
| A_55_P1971 | 481.5 Detected    | 433.8 Detected    | 496 Detected      | 554.7 Detected    | Mdk           | 1.152024922 | 1.03011423  | 1.27869986 | 1.143384   |           |
| A_55_P1958 | 903.5 Detected    | 655.5 Detected    | 755.1 Detected    | 1040.8 Detected   | Slc27a3       | 1.151964582 | 0.83574986  | 1.58779558 | 1.1519451  |           |
| A_51_P4774 | 3136.2 Detected   | 3142.5 Detected   | 3279.3 Detected   | 3612.6 Detected   | Cnot10        | 1.151903578 | 1.04562847  | 1.14959427 | 1.0435322  |           |
| A_51_P5177 | 17944.2 Detected  | 16910.4 Detected  | 18527.7 Detected  | 20669.7 Detected  | Clptm11       | 1.151887518 | 1.03251747  | 1.22230698 | 1.0956394  |           |
| A_55_P2075 | 27 Detected       | 30 Detected       | 28.3 Detected     | 31.1 Not Detect   | Tnni3k        | 1.151851852 | 1.04814815  | 1.03666667 | 0.9433333  |           |
| A_55_P2119 | 14.5 Detected     | 13.2 Not Detect   | 8.7 Not Detect    | 16.7 Not Detect   | Pfkfb4        | 1.151724138 | 0.6         | 1.26515152 | 0.6590909  |           |
| A_55_P2016 | 156.9 Detected    | 98.4 Detected     | 110.7 Detected    | 180.7 Detected    | 1700039I01Rik | 1.151688974 | 0.70554493  | 1.83638211 | 1.125      |           |
| A_55_P2081 | 289463.3 Detected | 336616.1 Detected | 324947.9 Detected | 333355.6 Detected | Gapdh         | 1.151633385 | 1.12258756  | 0.99031389 | 0.9653368  |           |
| A_55_P2020 | 27.7 Detected     | 20.6 Detected     | 34.5 Detected     | 31.9 Not Detect   | Homez         | 1.151624549 | 1.24548736  | 1.54854369 | 1.6747573  |           |
| A_66_P1265 | 45566.3 Detected  | 60267.1 Detected  | 60016.7 Detected  | 52472.2 Detected  | Phb2          | 1.151557182 | 1.31712911  | 0.87066078 | 0.9958452  |           |
| A_55_P2063 | 7131.9 Detected   | 7805.3 Detected   | 4151.8 Detected   | 8212.4 Detected   | Dusp14        | 1.151502405 | 0.58214501  | 1.05215687 | 0.5319206  |           |
| A_66_P1162 | 3389.7 Detected   | 4378.8 Detected   | 3734.3 Detected   | 3903.1 Detected   | Dusp16        | 1.151458831 | 1.10166091  | 0.89136293 | 0.8528136  |           |
| A_55_P2122 | 355.9 Detected    | 414.1 Detected    | 451.6 Detected    | 409.8 Detected    | Top3a         | 1.151447036 | 1.26889576  | 0.98961603 | 1.0905578  |           |
| A_51_P2613 | 1521.7 Detected   | 1635 Detected     | 2046.2 Detected   | 1752 Detected     | Spats2        | 1.151343892 | 1.34468029  | 1.07155963 | 1.2514985  |           |
| A_51_P3984 | 1554.9 Detected   | 1484.7 Detected   | 1397.1 Detected   | 1790.2 Detected   | Kctd13        | 1.15132806  | 0.89851437  | 1.20576547 | 0.9409982  |           |
| A_51_P2483 | 334.1 Detected    | 352.4 Detected    | 423.6 Detected    | 384.6 Detected    | Pcyox11       | 1.15115235  | 1.26788387  | 1.09137344 | 1.2020431  |           |
| A_55_P2148 | 530.7 Detected    | 493.5 Detected    | 416.8 Detected    | 610.9 Detected    | Tsr2          | 1.151121161 | 0.7853778   | 1.2378926  | 0.8445795  |           |
| A_51_P3262 | 530.7 Detected    | 544 Detected      | 441.8 Detected    | 610.9 Detected    | Ddx25         | 1.151121161 | 0.8324854   | 1.12297794 | 0.8121324  |           |
| A_55_P1986 | 33.1 Detected     | 32.5 Detected     | 32.9 Detected     | 38.1 Not Detect   | Gm19402       | 1.151057402 | 0.9939577   | 1.17230769 | 1.0123077  |           |
| A_55_P2132 | 52.3 Detected     | 71.4 Detected     | 78.6 Detected     | 60.2 Detected     | Gm14486       | 1.151051625 | 1.50286807  | 0.84313725 | 1.1008403  |           |
| A_55_P2327 | 1512.5 Detected   | 998.3 Detected    | 1598.3 Detected   | 1740.6 Detected   | Ano6          | 1.150809917 | 1.05672727  | 1.74356406 | 1.6010217  |           |
| A_55_P2011 | 216010.4 Detected | 232609.9 Detected | 214436.9 Detected | 248580.4 Detected | Rpl13         | 1.150779777 | 0.99271563  | 1.06865787 | 0.9218735  |           |
| A_52_P3677 | 2522.2 Detected   | 2485.4 Detected   | 3361.9 Detected   | 2902.3 Detected   | Acads         | 1.150701768 | 1.33292364  | 1.1677396  | 1.3526595  |           |
| A_55_P1977 | 200.4 Detected    | 211.9 Detected    | 187.8 Detected    | 230.6 Detected    | Oscar         | 1.150698603 | 0.93712575  | 1.08824917 | 0.8862671  |           |
| A_55_P2036 | 8287.8 Detected   | 9747 Detected     | 9245.3 Detected   | 9536.3 Detected   | Hist2h2bb     | 1.150643114 | 1.11553126  | 0.97838309 | 0.9485278  |           |
| A_52_P1792 | 1100.8 Detected   | 1030.6 Detected   | 1142.4 Detected   | 1266.6 Detected   | H2afy         | 1.150617733 | 1.0377907   | 1.22899282 | 1.1084805  |           |
| A_55_P2032 | 6355.9 Detected   | 6839.1 Detected   | 6542 Detected     | 7313 Detected     | Trim24        | 1.150584496 | 1.02927988  | 1.06929274 | 0.9565586  |           |
| A_55_P2183 | 1436.7 Detected   | 1333.6 Detected   | 1768.7 Detected   | 1653 Detected     | Spcs2         | 1.150553351 | 1.23108513  | 1.2395021  | 1.3262597  |           |
| A_55_P2173 | 290.3 Detected    | 278.8 Detected    | 271 Detected      | 334 Detected      | Mroh5         | 1.15053393  | 0.93351705  | 1.19799139 | 0.972023   |           |
| A_55_P2108 | 2082.9 Detected   | 1942.3 Detected   | 2101.5 Detected   | 2396.4 Detected   |               | 2-Mar       | 1.150511306 | 1.00892986 | 1.23379499 | 1.0819647 |
| A_52_P4297 | 3267.4 Detected   | 3025.3 Detected   | 3373.3 Detected   | 3759 Detected     | Tmem115       | 1.15045602  | 1.03241109  | 1.2425214  | 1.1150299  |           |
| A_55_P2014 | 34508.8 Detected  | 40480.1 Detected  | 33416.5 Detected  | 39700.8 Detected  | Gjb3          | 1.150454377 | 0.9683472   | 0.98074857 | 0.8255044  |           |
| A_55_P2076 | 33.9 Detected     | 48.1 Detected     | 43.5 Detected     | 39 Not Detect     | Csn1s2b       | 1.150442478 | 1.28318584  | 0.81081081 | 0.9043659  |           |
| A_52_P4607 | 460.1 Detected    | 533.2 Detected    | 522.5 Detected    | 529.3 Detected    | Rassf3        | 1.150402087 | 1.13562269  | 0.99268567 | 0.9799325  |           |

|            |         |          |         |          |         |          |         |          |               |             |            |            |           |
|------------|---------|----------|---------|----------|---------|----------|---------|----------|---------------|-------------|------------|------------|-----------|
| A_52_P4925 | 2841.4  | Detected | 2064.2  | Detected | 3406.9  | Detected | 3268.7  | Detected | Erbp2         | 1.150383614 | 1.19902161 | 1.58351904 | 1.6504699 |
| A_52_P3620 | 10099.1 | Detected | 13062.6 | Detected | 12267.6 | Detected | 11616.4 | Detected | Polr2e        | 1.150241111 | 1.2147221  | 0.88928697 | 0.9391392 |
| A_55_P2120 | 1139.8  | Detected | 1138.4  | Detected | 1089.3  | Detected | 1311    | Detected | Gm8587        | 1.15020179  | 0.95569398 | 1.1516163  | 0.9568693 |
| A_51_P3494 | 60339.6 | Detected | 33951.2 | Detected | 53925.2 | Detected | 69402.5 | Detected | Mboat1        | 1.150198211 | 0.89369502 | 2.04418401 | 1.588315  |
| A_66_P1275 | 34008.3 | Detected | 35401.8 | Detected | 38832.9 | Detected | 39112.6 | Detected | Nxf1          | 1.150089831 | 1.14186537 | 1.10481953 | 1.0969188 |
| A_52_P3362 | 3188.3  | Detected | 2226.8  | Detected | 2390.4  | Detected | 3666.8  | Detected | Rap2a         | 1.15007998  | 0.74974124 | 1.64666786 | 1.0734687 |
| A_52_P5911 | 10573.4 | Detected | 8528.1  | Detected | 8777.2  | Detected | 12159.8 | Detected | Dpysl2        | 1.150036885 | 0.83012087 | 1.42585101 | 1.0292093 |
| A_55_P2090 | 54.7    | Detected | 49.4    | Detected | 49.4    | Detected | 62.9    | Detected | Spred1        | 1.149908592 | 0.90310786 | 1.27327935 | 1         |
| A_51_P4246 | 484.5   | Detected | 496     | Detected | 745.7   | Detected | 557.1   | Detected | Sirt4         | 1.149845201 | 1.53911249 | 1.12318548 | 1.5034274 |
| A_51_P3437 | 84.1    | Detected | 98.9    | Detected | 61.2    | Detected | 96.7    | Detected | Slc39a2       | 1.149821641 | 0.72770511 | 0.97775531 | 0.6188069 |
| A_55_P2008 | 329.1   | Detected | 317.3   | Detected | 346.5   | Detected | 378.4   | Detected | Ubr2          | 1.149802492 | 1.05287147 | 1.19256224 | 1.0920265 |
| A_51_P1090 | 6081.8  | Detected | 2990.5  | Detected | 8383.3  | Detected | 6992.8  | Detected | Paqr4         | 1.14979118  | 1.37842415 | 2.33833807 | 2.8033105 |
| A_55_P2157 | 652.6   | Detected | 883.6   | Detected | 711.3   | Detected | 750.3   | Detected | Gm9156        | 1.149708857 | 1.0899479  | 0.84913988 | 0.8050023 |
| A_55_P2149 | 14138.4 | Detected | 16353.5 | Detected | 12478   | Detected | 16254.7 | Detected | Sh3bp5l       | 1.149684547 | 0.88256097 | 0.99395848 | 0.7630171 |
| A_65_P0523 | 2899.6  | Detected | 2918.6  | Detected | 2558.8  | Detected | 3333.5  | Detected | Knop1         | 1.14964133  | 0.88246655 | 1.1421572  | 0.8767217 |
| A_55_P2142 | 1533    | Detected | 3064    | Detected | 846.5   | Detected | 1762.4  | Detected | Echdc2        | 1.149641226 | 0.55218526 | 0.57519582 | 0.2762728 |
| A_55_P2144 | 2809.4  | Detected | 2557.8  | Detected | 3079.3  | Detected | 3229.8  | Detected | BC030476      | 1.149640493 | 1.09607034 | 1.26272578 | 1.2038862 |
| A_51_P1124 | 6178.4  | Detected | 9068.3  | Detected | 7042.6  | Detected | 7102.4  | Detected | Wdr3          | 1.149553282 | 1.1398744  | 0.78321185 | 0.7766174 |
| A_51_P4109 | 1542.7  | Detected | 1586.2  | Detected | 1896.8  | Detected | 1773.4  | Detected | Polr3g        | 1.149543009 | 1.22953264 | 1.1180179  | 1.1958139 |
| A_51_P1815 | 916.5   | Detected | 752.6   | Detected | 681     | Detected | 1053.5  | Detected | Brwd1         | 1.149481724 | 0.74304419 | 1.39981398 | 0.9048631 |
| A_55_P2300 | 348.7   | Detected | 329.4   | Detected | 340.6   | Detected | 400.8   | Detected | Tmprss11bnl   | 1.149412102 | 0.97677086 | 1.21675774 | 1.0340012 |
| A_52_P4002 | 12153.9 | Detected | 10331.2 | Detected | 15833.1 | Detected | 13969.3 | Detected | Ccs           | 1.149367693 | 1.30271765 | 1.35214689 | 1.5325519 |
| A_51_P2239 | 1850    | Detected | 2032.1  | Detected | 1510.5  | Detected | 2126.2  | Detected | Pds5b         | 1.149297297 | 0.81648649 | 1.04630678 | 0.7433197 |
| A_55_P1991 | 80.4    | Detected | 65.6    | Detected | 64.2    | Detected | 92.4    | Detected | Slc34a1       | 1.149253731 | 0.79850746 | 1.40853659 | 0.9786585 |
| A_51_P2087 | 93.8    | Detected | 102.9   | Detected | 111.5   | Detected | 107.8   | Detected | Gm7544        | 1.149253731 | 1.18869936 | 1.04761905 | 1.0835763 |
| A_51_P1298 | 3820.4  | Detected | 3958.4  | Detected | 2288.2  | Detected | 4390.6  | Detected | Atxn1l        | 1.149251387 | 0.59894252 | 1.10918553 | 0.5780618 |
| A_55_P2117 | 98.5    | Detected | 101.8   | Detected | 98.3    | Detected | 113.2   | Detected | Lhfp15        | 1.149238579 | 0.99796954 | 1.11198428 | 0.9656189 |
| A_66_P1330 | 17602.1 | Detected | 14984.4 | Detected | 20685.2 | Detected | 20229   | Detected | Mbd2          | 1.149237875 | 1.17515524 | 1.350004   | 1.380449  |
| A_55_P2008 | 6432.5  | Detected | 5753.1  | Detected | 7073.5  | Detected | 7392.3  | Detected | SrpX2         | 1.149211038 | 1.09965021 | 1.28492465 | 1.229511  |
| A_55_P2133 | 16582.7 | Detected | 13683.7 | Detected | 18695.1 | Detected | 19056.6 | Detected | Sipa1         | 1.149185597 | 1.12738577 | 1.39264965 | 1.3662314 |
| A_51_P2071 | 12296.7 | Detected | 10402.3 | Detected | 15405.3 | Detected | 14129.8 | Detected | 1110008P14Rik | 1.149072515 | 1.25279953 | 1.35833421 | 1.4809513 |
| A_66_P1136 | 4070.1  | Detected | 3446.9  | Detected | 6824.1  | Detected | 4676.7  | Detected | Tmem62        | 1.149038107 | 1.67664185 | 1.35678436 | 1.9797789 |
| A_55_P1993 | 10544   | Detected | 13679   | Detected | 6300.2  | Detected | 12115.3 | Detected | Gas8          | 1.149023141 | 0.59751517 | 0.88568609 | 0.4605746 |
| A_55_P2040 | 39.6    | Detected | 51.1    | Detected | 35.9    | Detected | 45.5    | Detected | Gm7337        | 1.148989899 | 0.90656566 | 0.89041096 | 0.702544  |
| A_51_P4526 | 213.5   | Detected | 175.8   | Detected | 145.4   | Detected | 245.3   | Detected | Pou5f2        | 1.148946136 | 0.68103044 | 1.39533561 | 0.8270762 |
| A_55_P2177 | 208.2   | Detected | 154.7   | Detected | 205.1   | Detected | 239.2   | Detected | Mast1         | 1.148895293 | 0.98511047 | 1.54621849 | 1.3257919 |
| A_52_P4712 | 373.8   | Detected | 428.2   | Detected | 421.9   | Detected | 429.4   | Detected | ErcC8         | 1.148742643 | 1.12867844 | 1.00280243 | 0.9852872 |
| A_51_P1687 | 4997.6  | Detected | 4853.3  | Detected | 6423.1  | Detected | 5740.8  | Detected | Xylb          | 1.148711381 | 1.28523691 | 1.18286527 | 1.32345   |
| A_55_P2143 | 3303.8  | Detected | 1735.9  | Detected | 4082.3  | Detected | 3794.8  | Detected | Etl4          | 1.148616744 | 1.23563775 | 2.18607063 | 2.3516908 |
| A_55_P2013 | 57464.9 | Detected | 72197.7 | Detected | 51840   | Detected | 66003.9 | Detected | Hmgb1         | 1.148595055 | 0.9021159  | 0.91421056 | 0.7180284 |



|            |          |          |          |          |          |          |          |            |               |             |            |            |           |
|------------|----------|----------|----------|----------|----------|----------|----------|------------|---------------|-------------|------------|------------|-----------|
| A_55_P2047 | 683.9    | Detected | 523.5    | Detected | 935.9    | Detected | 785.5    | Detected   | Capn5         | 1.148559731 | 1.36847492 | 1.50047755 | 1.7877746 |
| A_51_P2316 | 47380.3  | Detected | 44414    | Detected | 54791.6  | Detected | 54418.7  | Detected   | Ik            | 1.148551191 | 1.15642155 | 1.22526005 | 1.2336561 |
| A_52_P1424 | 204      | Detected | 224.9    | Detected | 157.3    | Detected | 234.3    | Detected   | 5830409B07Rik | 1.148529412 | 0.77107843 | 1.04179635 | 0.699422  |
| A_55_P2041 | 25989.9  | Detected | 27208.5  | Detected | 23186.6  | Detected | 29849.8  | Detected   | Rbp3          | 1.148515385 | 0.89213887 | 1.09707628 | 0.8521822 |
| A_55_P2053 | 373890.6 | Detected | 398455   | Detected | 358012.8 | Detected | 429419   | Detected   | Pirb          | 1.1485151   | 0.95753357 | 1.07771016 | 0.8985025 |
| A_55_P1964 | 20107.2  | Detected | 25393.6  | Detected | 19928    | Detected | 23093.2  | Detected   | Slc35e4       | 1.148504018 | 0.99108777 | 0.90941025 | 0.7847647 |
| A_55_P2066 | 175.1    | Detected | 166.4    | Detected | 166.3    | Detected | 201.1    | Detected   | Oprl1         | 1.148486579 | 0.949743   | 1.20853365 | 0.999399  |
| A_51_P4779 | 4500.8   | Detected | 2317.6   | Detected | 3805.5   | Detected | 5169     | Detected   | Fbxw4         | 1.148462496 | 0.84551635 | 2.23032447 | 1.6420003 |
| A_66_P1407 | 61.3     | Detected | 112.3    | Detected | 74.2     | Detected | 70.4     | Detected   | Gm10584       | 1.148450245 | 1.21044046 | 0.62689225 | 0.6607302 |
| A_55_P2049 | 221      | Detected | 203.7    | Detected | 262.4    | Detected | 253.8    | Detected   | Zfp26         | 1.14841629  | 1.18733032 | 1.24594993 | 1.2881689 |
| A_51_P4204 | 5451.8   | Detected | 4491.3   | Detected | 5054.2   | Detected | 6260.6   | Detected   | Srd5a1        | 1.148354672 | 0.92706996 | 1.39393939 | 1.1253312 |
| A_55_P2183 | 20498.6  | Detected | 19110.1  | Detected | 22435.2  | Detected | 23539    | Detected   | Vwa3b         | 1.148322324 | 1.09447474 | 1.23175703 | 1.173997  |
| A_51_P1504 | 2221.1   | Detected | 2380     | Detected | 2473.3   | Detected | 2550.4   | Detected   | Mkrn2         | 1.148259871 | 1.11354734 | 1.07159664 | 1.0392017 |
| A_55_P2084 | 19203.7  | Detected | 19158    | Detected | 17805.8  | Detected | 22050.8  | Detected   | Acaca         | 1.148257888 | 0.92720674 | 1.15099697 | 0.9294185 |
| A_52_P6353 | 161.9    | Detected | 91.6     | Detected | 171.3    | Detected | 185.9    | Detected   | Fes           | 1.148239654 | 1.05806053 | 2.02947598 | 1.8700873 |
| A_51_P4388 | 1075.5   | Detected | 1366.4   | Detected | 1315.9   | Detected | 1234.9   | Detected   | Pmf1          | 1.148210135 | 1.22352394 | 0.90376171 | 0.9630416 |
| A_55_P2071 | 13152.9  | Detected | 12534.5  | Detected | 17568.7  | Detected | 15102    | Detected   | Gm6195        | 1.148187852 | 1.33572824 | 1.20483466 | 1.4016275 |
| A_55_P2091 | 44171.6  | Detected | 46484.9  | Detected | 36142.8  | Detected | 50716.5  | Detected   | ND4L          | 1.148169865 | 0.81823615 | 1.09103171 | 0.777517  |
| A_55_P2007 | 152837.8 | Detected | 118652.5 | Detected | 190433.2 | Detected | 175480.6 | Detected   | Edf1          | 1.148149214 | 1.24598234 | 1.47894566 | 1.6049658 |
| A_55_P1979 | 34337.8  | Detected | 26750.6  | Detected | 25132.1  | Detected | 39423.6  | Detected   | Rhoc          | 1.148110828 | 0.73190769 | 1.47374638 | 0.9394967 |
| A_51_P1037 | 3167.1   | Detected | 2487.1   | Detected | 2883.8   | Detected | 3636     | Detected   | Ip6k1         | 1.148053424 | 0.91054908 | 1.46194363 | 1.159503  |
| A_51_P4271 | 316.9    | Detected | 339      | Detected | 406.7    | Detected | 363.8    | Detected   | Lacc1         | 1.147996213 | 1.28337015 | 1.07315634 | 1.199705  |
| A_51_P2268 | 66.9     | Detected | 64.4     | Detected | 72       | Detected | 76.8     | Detected   | Sh2d2a        | 1.147982063 | 1.07623318 | 1.19254658 | 1.1180124 |
| A_55_P2023 | 42.6     | Detected | 50.2     | Detected | 36.5     | Detected | 48.9     | Not Detect | Gm13084       | 1.147887324 | 0.85680751 | 0.97410359 | 0.7270916 |
| A_55_P1970 | 28.4     | Detected | 36.3     | Detected | 41       | Detected | 32.6     | Not Detect | Igsf9b        | 1.147887324 | 1.44366197 | 0.89807163 | 1.1294766 |
| A_55_P2041 | 581.6    | Detected | 701.6    | Detected | 685.2    | Detected | 667.6    | Detected   | Zmym5         | 1.14786795  | 1.1781293  | 0.95153934 | 0.9766249 |
| A_51_P3629 | 10520.4  | Detected | 11305.8  | Detected | 12153.8  | Detected | 12075.8  | Detected   | Mrps22        | 1.14784609  | 1.15526026 | 1.06810664 | 1.0750057 |
| A_52_P1871 | 72527.1  | Detected | 79508.9  | Detected | 74923.5  | Detected | 83238.7  | Detected   | Ybx1          | 1.147691001 | 1.03304144 | 1.04691047 | 0.9423285 |
| A_55_P2051 | 93836.1  | Detected | 113227.4 | Detected | 96350.3  | Detected | 107693.7 | Detected   | Sec61b        | 1.147678772 | 1.02679353 | 0.95112755 | 0.8509451 |
| A_51_P2737 | 4363.5   | Detected | 4094.5   | Detected | 4154.4   | Detected | 5007.8   | Detected   | Exoc7         | 1.147656698 | 0.95207975 | 1.22305532 | 1.0146294 |
| A_51_P2357 | 3187.8   | Detected | 4114.7   | Detected | 4307.4   | Detected | 3658.5   | Detected   | Tsfm          | 1.147656691 | 1.351214   | 0.88912922 | 1.0468321 |
| A_55_P2008 | 40989.4  | Detected | 46296.6  | Detected | 45726.5  | Detected | 47037.3  | Detected   | Cdkn2a        | 1.147547903 | 1.1155689  | 1.01599902 | 0.9876859 |
| A_55_P2039 | 17655.9  | Detected | 19024.7  | Detected | 19117.6  | Detected | 20260.1  | Detected   | Eed           | 1.147497437 | 1.08278819 | 1.06493664 | 1.0048831 |
| A_52_P4427 | 4487.8   | Detected | 4057.1   | Detected | 3939     | Detected | 5149.6   | Detected   | Btf3l4        | 1.147466465 | 0.87771291 | 1.26928101 | 0.9708905 |
| A_51_P4472 | 84.1     | Detected | 101.2    | Detected | 97       | Detected | 96.5     | Detected   | Fkbp14        | 1.14744352  | 1.15338882 | 0.95355731 | 0.958498  |
| A_51_P3142 | 16151.8  | Detected | 26694.9  | Detected | 25233.7  | Detected | 18531.9  | Detected   | Tmem86a       | 1.147358189 | 1.56228408 | 0.69421125 | 0.945263  |
| A_55_P2050 | 132.4    | Detected | 144.5    | Detected | 224.9    | Detected | 151.9    | Detected   | LOC100048452  | 1.147280967 | 1.69864048 | 1.05121107 | 1.5564014 |
| A_55_P2133 | 6984     | Detected | 5775.4   | Detected | 7067.2   | Detected | 8012.6   | Detected   | Gapvd1        | 1.147279496 | 1.01191294 | 1.38736711 | 1.2236728 |
| A_55_P2075 | 1631.7   | Detected | 1654.5   | Detected | 1676.8   | Detected | 1871.9   | Detected   | Nf1           | 1.147208433 | 1.02763988 | 1.13139921 | 1.0134784 |
| A_55_P2037 | 1067.3   | Detected | 1012.2   | Detected | 1106.7   | Detected | 1224.4   | Detected   | Gm10427       | 1.147193854 | 1.03691558 | 1.20964236 | 1.093361  |

|            |         |          |         |          |         |          |         |            |               |             |            |            |           |
|------------|---------|----------|---------|----------|---------|----------|---------|------------|---------------|-------------|------------|------------|-----------|
| A_51_P1746 | 5152.4  | Detected | 5621.4  | Detected | 5545    | Detected | 5910.7  | Detected   | Asl           | 1.147174132 | 1.0761975  | 1.05146405 | 0.9864091 |
| A_55_P1982 | 13952.5 | Detected | 17455.5 | Detected | 16224.1 | Detected | 16005.8 | Detected   | Llph          | 1.147163591 | 1.16280953 | 0.91694881 | 0.9294549 |
| A_55_P1979 | 41267.2 | Detected | 55079.4 | Detected | 51717.7 | Detected | 47338.5 | Detected   | Eif3h         | 1.147121685 | 1.25323986 | 0.85945925 | 0.9389663 |
| A_55_P1983 | 12703   | Detected | 12497.7 | Detected | 7655.4  | Detected | 14571.8 | Detected   | Mapk6         | 1.147114855 | 0.60264504 | 1.16595854 | 0.6125447 |
| A_55_P1952 | 3875.3  | Detected | 3631.1  | Detected | 3188.9  | Detected | 4445.3  | Detected   | R3hdm2        | 1.147085387 | 0.82287823 | 1.22422957 | 0.8782187 |
| A_52_P2405 | 29060.1 | Detected | 36334.4 | Detected | 44473.3 | Detected | 33334   | Detected   | Id2           | 1.14707107  | 1.53039047 | 0.91742261 | 1.2239998 |
| A_55_P2066 | 1882.4  | Detected | 3221.6  | Detected | 398     | Detected | 2159.2  | Detected   | Ifi204        | 1.147046324 | 0.21143221 | 0.67022597 | 0.1235411 |
| A_55_P2183 | 472     | Detected | 456.9   | Detected | 430.3   | Detected | 541.4   | Detected   | Snx11         | 1.147033898 | 0.91165254 | 1.184942   | 0.9417816 |
| A_51_P1137 | 9684.1  | Detected | 11197.5 | Detected | 9859.8  | Detected | 11107.6 | Detected   | Fbxl14        | 1.146993525 | 1.01814314 | 0.99197142 | 0.8805358 |
| A_55_P1962 | 36923.8 | Detected | 42888.9 | Detected | 38049.2 | Detected | 42349.7 | Detected   | Ssr1          | 1.146948581 | 1.03047899 | 0.98742798 | 0.8871573 |
| A_55_P2038 | 1774.9  | Detected | 1792    | Detected | 2165.1  | Detected | 2035.7  | Detected   | Lancl2        | 1.146937856 | 1.21984337 | 1.1359933  | 1.2082031 |
| A_66_P1063 | 9677.7  | Detected | 11694.7 | Detected | 12162.8 | Detected | 11099.6 | Detected   | Strap         | 1.146925406 | 1.25678622 | 0.9491137  | 1.0400267 |
| A_55_P2198 | 437.3   | Detected | 402.3   | Detected | 421.4   | Detected | 501.5   | Detected   | 4930506A18Rik | 1.14680997  | 0.96364052 | 1.24658215 | 1.047477  |
| A_65_P1043 | 1813.9  | Detected | 2504.1  | Detected | 2335.8  | Detected | 2080.1  | Detected   | Rpp14         | 1.146755609 | 1.28772259 | 0.83067769 | 0.9327902 |
| A_55_P1986 | 1035.1  | Detected | 1439    | Detected | 1225.8  | Detected | 1187    | Detected   | Med23         | 1.146749106 | 1.18423341 | 0.82487839 | 0.8518416 |
| A_55_P2070 | 31239.3 | Detected | 33581.7 | Detected | 39160.5 | Detected | 35822.6 | Detected   | Dus1l         | 1.146715836 | 1.25356522 | 1.0667298  | 1.1661262 |
| A_55_P2020 | 33.4    | Detected | 31.5    | Detected | 27      | Detected | 38.3    | Not Detect | Sfrp5         | 1.146706587 | 0.80838323 | 1.21587302 | 0.8571429 |
| A_52_P1255 | 1585.8  | Detected | 1196.8  | Detected | 1615.4  | Detected | 1818.4  | Detected   | Rhod          | 1.146676756 | 1.01866566 | 1.51938503 | 1.349766  |
| A_55_P2107 | 211.5   | Detected | 141.1   | Detected | 189.1   | Detected | 242.5   | Detected   | Samd10        | 1.146572104 | 0.89408983 | 1.71863926 | 1.3401843 |
| A_52_P4787 | 682.7   | Detected | 604.7   | Detected | 650.3   | Detected | 782.7   | Detected   | Paxbp1        | 1.146477223 | 0.95254138 | 1.29436084 | 1.0754093 |
| A_66_P1213 | 1035    | Detected | 1046.6  | Detected | 965.3   | Detected | 1186.6  | Detected   | LOC101055820  | 1.14647343  | 0.932657   | 1.13376648 | 0.9223199 |
| A_55_P2027 | 5141.7  | Detected | 6191.8  | Detected | 6606.6  | Detected | 5894.8  | Detected   | Abhd17a       | 1.146469067 | 1.28490577 | 0.95203333 | 1.0669918 |
| A_55_P2012 | 23751.1 | Detected | 21094.1 | Detected | 22791   | Detected | 27229.6 | Detected   | App           | 1.146456375 | 0.95957661 | 1.29086332 | 1.0804443 |
| A_55_P1958 | 12551.1 | Detected | 11817.2 | Detected | 14492.8 | Detected | 14388.2 | Detected   | Map6          | 1.146369641 | 1.15470357 | 1.21756423 | 1.2264157 |
| A_52_P7283 | 1619.2  | Detected | 1533    | Detected | 1397.8  | Detected | 1856.2  | Detected   | Sec23a        | 1.146368577 | 0.86326581 | 1.21082844 | 0.9118069 |
| A_66_P1163 | 3375.9  | Detected | 2729.8  | Detected | 3571.4  | Detected | 3870    | Detected   | Kif5b         | 1.14636097  | 1.05791048 | 1.41768628 | 1.308301  |
| A_55_P2121 | 49.2    | Detected | 46.1    | Detected | 31.4    | Detected | 56.4    | Detected   | Ano8          | 1.146341463 | 0.63821138 | 1.22342733 | 0.681128  |
| A_55_P2133 | 5453.2  | Detected | 5433.6  | Detected | 7350.9  | Detected | 6251.1  | Detected   | Mmgt2         | 1.146317758 | 1.34799751 | 1.15045274 | 1.35286   |
| A_55_P1956 | 370.7   | Detected | 314.3   | Detected | 351.9   | Detected | 424.9   | Detected   | Gm14431       | 1.146209873 | 0.94928514 | 1.3518931  | 1.1196309 |
| A_55_P1962 | 26      | Detected | 25.8    | Detected | 73      | Detected | 29.8    | Not Detect | Jhdm1d        | 1.146153846 | 2.80769231 | 1.15503876 | 2.8294574 |
| A_52_P8877 | 3492.4  | Detected | 3307    | Detected | 4875.8  | Detected | 4002.8  | Detected   | Tor2a         | 1.146145917 | 1.39611728 | 1.21040218 | 1.4743877 |
| A_55_P1957 | 6824.9  | Detected | 7660.5  | Detected | 6725    | Detected | 7822.1  | Detected   | Ak2           | 1.146112031 | 0.98536242 | 1.02109523 | 0.87788   |
| A_52_P6571 | 1035.6  | Detected | 1145.8  | Detected | 800.3   | Detected | 1186.8  | Detected   | Spsb3         | 1.146002317 | 0.77278872 | 1.03578286 | 0.698464  |
| A_52_P3814 | 4717.4  | Detected | 3664.3  | Detected | 4229.6  | Detected | 5405.6  | Detected   | Spon2         | 1.145885445 | 0.89659558 | 1.47520672 | 1.1542723 |
| A_51_P4937 | 96      | Detected | 81.8    | Detected | 101.1   | Detected | 110     | Detected   | 2810474C18Rik | 1.145833333 | 1.053125   | 1.34474328 | 1.2359413 |
| A_55_P1957 | 54889.4 | Detected | 61739.1 | Detected | 57516.3 | Detected | 62894.1 | Detected   | Ak2           | 1.145833257 | 1.04785806 | 1.01870776 | 0.9316025 |
| A_55_P2065 | 160.5   | Detected | 236     | Detected | 185.5   | Detected | 183.9   | Detected   | Mrpl47        | 1.145794393 | 1.15576324 | 0.77923729 | 0.7860169 |
| A_55_P2185 | 38983.3 | Detected | 33258   | Detected | 41279.8 | Detected | 44665.6 | Detected   | Il17rc        | 1.145762416 | 1.05890984 | 1.34300319 | 1.2411991 |
| A_55_P2109 | 227.8   | Detected | 191     | Detected | 224.3   | Detected | 261     | Detected   | Trim6         | 1.145741879 | 0.98463565 | 1.36649215 | 1.1743455 |
| A_52_P3910 | 1678.9  | Detected | 1739.5  | Detected | 2145.2  | Detected | 1923.4  | Detected   | Hinfp         | 1.145631068 | 1.27774138 | 1.10572003 | 1.2332279 |

|            |                   |                   |                   |                   |               |             |            |            |           |
|------------|-------------------|-------------------|-------------------|-------------------|---------------|-------------|------------|------------|-----------|
| A_51_P2753 | 10.3 Not Detect   | 13.9 Not Detect   | 22 Detected       | 11.8 Not Detect   | Olfr1411      | 1.145631068 | 2.13592233 | 0.84892086 | 1.5827338 |
| A_52_P3066 | 109.2 Detected    | 65.7 Detected     | 69.9 Detected     | 125.1 Detected    | Dmd           | 1.145604396 | 0.64010989 | 1.90410959 | 1.0639269 |
| A_55_P2168 | 57.7 Detected     | 61.2 Detected     | 62.5 Detected     | 66.1 Detected     | A930017K11Rik | 1.145580589 | 1.08318891 | 1.08006536 | 1.0212418 |
| A_55_P2052 | 105.1 Detected    | 95.1 Detected     | 89.3 Detected     | 120.4 Detected    | Ushbp1        | 1.145575642 | 0.84966698 | 1.26603575 | 0.9390116 |
| A_55_P2065 | 59377.5 Detected  | 54534 Detected    | 51077.2 Detected  | 68021.2 Detected  | 9230110C19Rik | 1.145571976 | 0.86021136 | 1.24731727 | 0.936612  |
| A_55_P2111 | 6238.2 Detected   | 6736 Detected     | 5206.3 Detected   | 7146.2 Detected   | Rcc2          | 1.145554807 | 0.83458369 | 1.06089667 | 0.7729068 |
| A_52_P8517 | 69.4 Detected     | 85.6 Detected     | 80.8 Detected     | 79.5 Detected     | Tlr3          | 1.145533141 | 1.16426513 | 0.92873832 | 0.9439252 |
| A_51_P2439 | 118.9 Detected    | 162.3 Detected    | 111.9 Detected    | 136.2 Detected    | Nell2         | 1.145500421 | 0.941127   | 0.83918669 | 0.689464  |
| A_55_P2070 | 3203.2 Detected   | 3092.1 Detected   | 2974.2 Detected   | 3669.1 Detected   | Taf7l         | 1.145448302 | 0.92850899 | 1.18660457 | 0.9618706 |
| A_51_P4136 | 64155.2 Detected  | 68983 Detected    | 60108.7 Detected  | 73483.3 Detected  | Mrpl20        | 1.14539897  | 0.93692639 | 1.06523781 | 0.8713553 |
| A_55_P2185 | 152 Detected      | 173.7 Detected    | 185.5 Detected    | 174.1 Detected    | Sirt4         | 1.145394737 | 1.22039474 | 1.00230282 | 1.0679332 |
| A_51_P2586 | 3683.3 Detected   | 2841 Detected     | 3005.5 Detected   | 4218.8 Detected   | Phf8          | 1.145385931 | 0.81598024 | 1.48497008 | 1.0579021 |
| A_55_P2120 | 35146.3 Detected  | 26864.7 Detected  | 39814 Detected    | 40253.8 Detected  | Ube2l3        | 1.145321129 | 1.13280772 | 1.49839008 | 1.4820192 |
| A_55_P2025 | 223.8 Detected    | 194.4 Detected    | 242.9 Detected    | 256.3 Detected    | Loxhd1        | 1.145218945 | 1.08534406 | 1.31841564 | 1.2494856 |
| A_55_P2146 | 17983 Detected    | 16580.2 Detected  | 14711.8 Detected  | 20594.2 Detected  | Chmp4b        | 1.145203804 | 0.81809487 | 1.24209599 | 0.8873114 |
| A_55_P2233 | 251.5 Detected    | 282.8 Detected    | 356 Detected      | 288 Detected      | Tmem260       | 1.145129225 | 1.41550696 | 1.01838755 | 1.2588402 |
| A_55_P2039 | 38.6 Detected     | 35.1 Detected     | 45.8 Detected     | 44.2 Detected     | Camp          | 1.14507772  | 1.1865285  | 1.25925926 | 1.3048433 |
| A_51_P4505 | 3108.2 Detected   | 3506.9 Detected   | 3247.1 Detected   | 3559.1 Detected   | Tagln         | 1.145067885 | 1.04468824 | 1.01488494 | 0.9259175 |
| A_55_P2002 | 1333.7 Detected   | 1208.6 Detected   | 1103.3 Detected   | 1527.1 Detected   | Ago2          | 1.145010122 | 0.82724751 | 1.26352805 | 0.9128744 |
| A_51_P4715 | 2767.5 Detected   | 2084.9 Detected   | 3951.6 Detected   | 3168.7 Detected   | Stk25         | 1.144968383 | 1.42785908 | 1.51983309 | 1.8953427 |
| A_55_P2091 | 17514.7 Detected  | 18116.8 Detected  | 14940.7 Detected  | 20053.3 Detected  | Srp54c        | 1.144941107 | 0.85303773 | 1.10688974 | 0.8246876 |
| A_55_P2040 | 9620.1 Detected   | 11391.4 Detected  | 8542.5 Detected   | 11014.3 Detected  | Map6d1        | 1.144925728 | 0.88798453 | 0.96689608 | 0.7499078 |
| A_55_P1957 | 1656.3 Detected   | 1879.2 Detected   | 1866.7 Detected   | 1896.2 Detected   | Inip          | 1.14484091  | 1.12703013 | 1.0090464  | 0.9933482 |
| A_51_P1274 | 2302.7 Detected   | 1850.3 Detected   | 2547.1 Detected   | 2636.2 Detected   | Ppp1r37       | 1.144829982 | 1.10613627 | 1.42474193 | 1.3765876 |
| A_55_P2174 | 22.1 Detected     | 28.1 Detected     | 26.9 Detected     | 25.3 Not Detect   | Olfr314       | 1.14479638  | 1.21719457 | 0.90035587 | 0.9572954 |
| A_51_P3076 | 41895.1 Detected  | 45537.6 Detected  | 38803.4 Detected  | 47961 Detected    | Gtf3a         | 1.144787815 | 0.92620378 | 1.05321756 | 0.8521178 |
| A_55_P2152 | 4739.5 Detected   | 4488.2 Detected   | 4907.2 Detected   | 5425.5 Detected   | 2900040C04Rik | 1.144741006 | 1.03538348 | 1.2088365  | 1.0933559 |
| A_66_P1324 | 4510.3 Detected   | 5729.2 Detected   | 4382.9 Detected   | 5163.1 Detected   | Gnpnat1       | 1.144735383 | 0.97175354 | 0.90119039 | 0.7650108 |
| A_55_P2173 | 69.8 Detected     | 58.9 Detected     | 81.2 Detected     | 79.9 Detected     | Tox2          | 1.14469914  | 1.16332378 | 1.3565365  | 1.3786078 |
| A_52_P7452 | 742.5 Detected    | 599.5 Detected    | 780 Detected      | 849.9 Detected    | Gm9734        | 1.144646465 | 1.05050505 | 1.4176814  | 1.3010842 |
| A_55_P1960 | 36367.7 Detected  | 28574.1 Detected  | 45764.1 Detected  | 41627.4 Detected  | EglN2         | 1.144625588 | 1.25837213 | 1.45682279 | 1.6015938 |
| A_55_P1953 | 68.5 Detected     | 90.6 Detected     | 69.1 Detected     | 78.4 Detected     | Nkx6-1        | 1.144525547 | 1.00875912 | 0.86534216 | 0.7626932 |
| A_55_P2144 | 129.4 Detected    | 135.9 Detected    | 143.4 Detected    | 148.1 Detected    | Bcl2l2        | 1.144513138 | 1.10819165 | 1.08977189 | 1.0551876 |
| A_55_P2200 | 27 Detected       | 29.5 Detected     | 29.7 Detected     | 30.9 Not Detect   | 8030456M14Rik | 1.144444444 | 1.1        | 1.04745763 | 1.0067797 |
| A_52_P2290 | 1988.9 Detected   | 2393.3 Detected   | 1644.4 Detected   | 2276.1 Detected   | Slc20a2       | 1.144401428 | 0.82678868 | 0.95102996 | 0.6870848 |
| A_55_P2149 | 65.1 Detected     | 61.7 Detected     | 53 Detected       | 74.5 Detected     | Abhd15        | 1.144393241 | 0.8141321  | 1.20745543 | 0.8589951 |
| A_55_P2141 | 905.4 Detected    | 1239.1 Detected   | 949.1 Detected    | 1036.1 Detected   | Gnpnat1       | 1.144356086 | 1.04826596 | 0.83617141 | 0.7659592 |
| A_51_P5062 | 85.9 Detected     | 81.5 Detected     | 86.7 Detected     | 98.3 Detected     | Cckbr         | 1.1443539   | 1.00931315 | 1.20613497 | 1.0638037 |
| A_52_P3280 | 219421.2 Detected | 244627.8 Detected | 248553.8 Detected | 251084.1 Detected | Atp5b         | 1.144301918 | 1.13277022 | 1.02639234 | 1.0160489 |
| A_51_P1388 | 20.1 Detected     | 21 Detected       | 16.5 Not Detect   | 23 Not Detect     | LOC101055924  | 1.144278607 | 0.82089552 | 1.0952381  | 0.7857143 |

|            |          |            |          |          |          |            |          |            |               |             |            |            |           |
|------------|----------|------------|----------|----------|----------|------------|----------|------------|---------------|-------------|------------|------------|-----------|
| A_55_P1981 | 18002.5  | Detected   | 13527.1  | Detected | 21436.2  | Detected   | 20599.5  | Detected   | Lamc1         | 1.144257742 | 1.19073462 | 1.52283194 | 1.5846856 |
| A_55_P2159 | 211283.1 | Detected   | 221111.4 | Detected | 208387.2 | Detected   | 241757.3 | Detected   | Mfsd2b        | 1.144233969 | 0.98629375 | 1.0933733  | 0.9424534 |
| A_55_P1953 | 20.8     | Detected   | 23.9     | Detected | 15.9     | Not Detect | 23.8     | Not Detect | Gm3893        | 1.144230769 | 0.76442308 | 0.9958159  | 0.665272  |
| A_52_P8909 | 2177.6   | Detected   | 2507.7   | Detected | 2247.8   | Detected   | 2491.6   | Detected   | Nolc1         | 1.144195445 | 1.03223733 | 0.99357977 | 0.8963592 |
| A_55_P2072 | 10688.1  | Detected   | 9523.2   | Detected | 9849.6   | Detected   | 12229.1  | Detected   | Ckmt1         | 1.14417904  | 0.92154826 | 1.28413768 | 1.0342742 |
| A_51_P5127 | 1272.9   | Detected   | 1002.8   | Detected | 1367.8   | Detected   | 1456.4   | Detected   | Rmdn1         | 1.144159007 | 1.07455417 | 1.45233347 | 1.3639809 |
| A_55_P2045 | 650.2    | Detected   | 627.2    | Detected | 592.7    | Detected   | 743.9    | Detected   | Gm757         | 1.144109505 | 0.91156567 | 1.18606505 | 0.9449936 |
| A_55_P2096 | 128.5    | Detected   | 108.7    | Detected | 109.1    | Detected   | 147      | Detected   | Cyp20a1       | 1.143968872 | 0.84902724 | 1.35234591 | 1.0036799 |
| A_55_P1968 | 17384.7  | Detected   | 15904.8  | Detected | 11854.8  | Detected   | 19887.3  | Detected   | Rasa3         | 1.143954167 | 0.68190996 | 1.25039611 | 0.7453599 |
| A_55_P2067 | 3644.8   | Detected   | 1946.9   | Detected | 4241.3   | Detected   | 4169.4   | Detected   | Foxa2         | 1.14393108  | 1.16365781 | 2.14155837 | 2.1784889 |
| A_52_P5204 | 4725.8   | Detected   | 4624     | Detected | 4249.5   | Detected   | 5405.8   | Detected   | Kif18b        | 1.143890981 | 0.89921283 | 1.16907439 | 0.9190095 |
| A_55_P1955 | 993.1    | Detected   | 1265.4   | Detected | 480.9    | Detected   | 1135.9   | Detected   | Cux1          | 1.143792166 | 0.48424126 | 0.89766082 | 0.3800379 |
| A_55_P2112 | 399.8    | Detected   | 322      | Detected | 438.6    | Detected   | 457.2    | Detected   | C030034I22Rik | 1.143571786 | 1.09704852 | 1.41987578 | 1.3621118 |
| A_52_P3038 | 1308.2   | Detected   | 1468.8   | Detected | 1469.7   | Detected   | 1496     | Detected   | Nr1d2         | 1.143556031 | 1.12345207 | 1.01851852 | 1.0006127 |
| A_55_P2285 | 157.5    | Detected   | 129.3    | Detected | 82.3     | Detected   | 180.1    | Detected   | A430071A18Rik | 1.143492063 | 0.52253968 | 1.39288476 | 0.6365043 |
| A_55_P2146 | 2090.8   | Detected   | 2248.9   | Detected | 2051     | Detected   | 2390.8   | Detected   | Nmnat1        | 1.143485747 | 0.98096422 | 1.06309751 | 0.9120014 |
| A_51_P3255 | 8276.7   | Detected   | 8939     | Detected | 8094     | Detected   | 9462.9   | Detected   | 2410004B18Rik | 1.143317989 | 0.97792598 | 1.05860835 | 0.9054704 |
| A_55_P2177 | 3520.2   | Detected   | 2411.1   | Detected | 3832.8   | Detected   | 4024.6   | Detected   | Abhd5         | 1.143287313 | 1.08880177 | 1.66919663 | 1.5896479 |
| A_55_P2030 | 22691.2  | Detected   | 25229.4  | Detected | 19072.7  | Detected   | 25942.5  | Detected   | Supt6         | 1.143284621 | 0.84053289 | 1.02826464 | 0.7559712 |
| A_51_P1959 | 55198.3  | Detected   | 68099.5  | Detected | 51996.9  | Detected   | 63103.1  | Detected   | Phlda1        | 1.143207309 | 0.94200184 | 0.92663089 | 0.7635431 |
| A_51_P2085 | 3935.8   | Detected   | 3608.1   | Detected | 4822.6   | Detected   | 4499.2   | Detected   | Gltsr2        | 1.143147518 | 1.22531633 | 1.24697209 | 1.3366038 |
| A_55_P2002 | 1473.3   | Detected   | 1647.6   | Detected | 2435     | Detected   | 1684     | Detected   | Dph7          | 1.143012285 | 1.65275232 | 1.02209274 | 1.4779073 |
| A_55_P2056 | 36203.3  | Detected   | 43251.8  | Detected | 34706.1  | Detected   | 41380.5  | Detected   | Sf3b3         | 1.143003538 | 0.95864465 | 0.95673475 | 0.8024198 |
| A_55_P2085 | 357.5    | Detected   | 344.6    | Detected | 347.1    | Detected   | 408.6    | Detected   | 5330417C22Rik | 1.142937063 | 0.97090909 | 1.18572258 | 1.0072548 |
| A_55_P2417 | 58.8     | Detected   | 34.2     | Detected | 55.1     | Detected   | 67.2     | Detected   | BC031361      | 1.142857143 | 0.93707483 | 1.96491228 | 1.6111111 |
| A_55_P1991 | 7.7      | Not Detect | 37.9     | Detected | 3.2      | Not Detect | 8.8      | Not Detect | Mlc1          | 1.142857143 | 0.41558442 | 0.23218997 | 0.0844327 |
| A_55_P2012 | 8821     | Detected   | 9773.3   | Detected | 11662.8  | Detected   | 10080.8  | Detected   | Stk16         | 1.142818275 | 1.32216302 | 1.03146327 | 1.1933329 |
| A_51_P4464 | 1736     | Detected   | 1594.3   | Detected | 1859.3   | Detected   | 1983.9   | Detected   | Ufl1          | 1.142799539 | 1.07102535 | 1.24437057 | 1.1662171 |
| A_51_P4968 | 1096.7   | Detected   | 1897.7   | Detected | 1531.3   | Detected   | 1253.3   | Detected   | Adat2         | 1.142792012 | 1.39627975 | 0.66043105 | 0.8069242 |
| A_52_P2530 | 12128.3  | Detected   | 9694.4   | Detected | 13233.1  | Detected   | 13859.5  | Detected   | Ralb          | 1.142740532 | 1.09109273 | 1.42963979 | 1.3650252 |
| A_55_P2159 | 2235.8   | Detected   | 2048     | Detected | 2143.4   | Detected   | 2554.8   | Detected   | Lepre1        | 1.142678236 | 0.95867251 | 1.24746094 | 1.046582  |
| A_51_P1319 | 10148.3  | Detected   | 14512    | Detected | 9957.3   | Detected   | 11596    | Detected   | Dph5          | 1.142654435 | 0.98117911 | 0.79906284 | 0.6861425 |
| A_55_P1971 | 263.8    | Detected   | 249.4    | Detected | 246.9    | Detected   | 301.4    | Detected   | Fsip1         | 1.142532221 | 0.93593632 | 1.2085004  | 0.9899759 |
| A_55_P2059 | 702.3    | Detected   | 782.3    | Detected | 571      | Detected   | 802.4    | Detected   | Crabp2        | 1.142531682 | 0.81304286 | 1.02569347 | 0.729899  |
| A_55_P2105 | 1502.3   | Detected   | 2064     | Detected | 1578.3   | Detected   | 1716.2   | Detected   | Zfp7          | 1.142381681 | 1.0505891  | 0.83149225 | 0.7646802 |
| A_51_P3525 | 8576.5   | Detected   | 9187.8   | Detected | 10149.1  | Detected   | 9796.7   | Detected   | Mrpl38        | 1.142272489 | 1.18336151 | 1.06627267 | 1.1046279 |
| A_55_P1994 | 10779    | Detected   | 10231.5  | Detected | 11722.3  | Detected   | 12312.5  | Detected   | Cldn12        | 1.142267372 | 1.08751276 | 1.20339149 | 1.1457069 |
| A_55_P2178 | 2281.1   | Detected   | 2596.6   | Detected | 1974.5   | Detected   | 2605.5   | Detected   | Gas5          | 1.142212091 | 0.86559116 | 1.00342756 | 0.7604175 |
| A_55_P2136 | 6450.6   | Detected   | 7496.9   | Detected | 6417.3   | Detected   | 7367.7   | Detected   | Ublcp1        | 1.142172821 | 0.99483769 | 0.98276621 | 0.8559938 |
| A_55_P2184 | 22417.3  | Detected   | 27660.6  | Detected | 28977.2  | Detected   | 25598    | Detected   | Eif2s1        | 1.141885954 | 1.29262668 | 0.92543184 | 1.0475984 |

|            |          |          |          |          |         |            |          |            |               |             |            |            |           |
|------------|----------|----------|----------|----------|---------|------------|----------|------------|---------------|-------------|------------|------------|-----------|
| A_55_P2047 | 3219.7   | Detected | 2628.3   | Detected | 4043.7  | Detected   | 3676.5   | Detected   | Ankrd40       | 1.141876572 | 1.25592447 | 1.39881292 | 1.538523  |
| A_55_P2007 | 57.8     | Detected | 71.6     | Detected | 32.7    | Detected   | 66       | Detected   | Dnajc21       | 1.141868512 | 0.56574394 | 0.92178771 | 0.4567039 |
| A_66_P1263 | 15297.6  | Detected | 19122.3  | Detected | 20004.2 | Detected   | 17467.8  | Detected   | Mrpl47        | 1.141865391 | 1.30766918 | 0.91347798 | 1.0461189 |
| A_55_P2424 | 27.5     | Detected | 17.2     | Detected | 19.2    | Detected   | 31.4     | Not Detect | 1300014J16Rik | 1.141818182 | 0.69818182 | 1.8255814  | 1.1162791 |
| A_51_P1757 | 17010.6  | Detected | 21166.9  | Detected | 22655.4 | Detected   | 19422.3  | Detected   | 9430023L20Rik | 1.141776304 | 1.33184015 | 0.91757886 | 1.0703221 |
| A_51_P2209 | 30436.5  | Detected | 32184.6  | Detected | 31748   | Detected   | 34749.2  | Detected   | Pfn1          | 1.141695004 | 1.04308971 | 1.07968407 | 0.9864345 |
| A_55_P2107 | 735.8    | Detected | 891.2    | Detected | 852.6   | Detected   | 840      | Detected   | Gm9855        | 1.141614569 | 1.15873879 | 0.94254937 | 0.9566876 |
| A_52_P3964 | 170.2    | Detected | 104.8    | Detected | 175.8   | Detected   | 194.3    | Detected   | Itsn1         | 1.14159812  | 1.03290247 | 1.85400763 | 1.6774809 |
| A_52_P1137 | 20462.5  | Detected | 17444.5  | Detected | 21030.4 | Detected   | 23359.3  | Detected   | Sfxn1         | 1.14156628  | 1.02775321 | 1.33906389 | 1.2055605 |
| A_55_P2118 | 472.6    | Detected | 428.6    | Detected | 440.4   | Detected   | 539.5    | Detected   | Rmi1          | 1.141557342 | 0.93186627 | 1.25874942 | 1.0275315 |
| A_55_P2042 | 30.4     | Detected | 33.9     | Detected | 41.1    | Detected   | 34.7     | Not Detect | Pls1          | 1.141447368 | 1.35197368 | 1.02359882 | 1.2123894 |
| A_55_P2136 | 1857.4   | Detected | 2503.2   | Detected | 1519.8  | Detected   | 2120.1   | Detected   | Ermn          | 1.141434263 | 0.81824055 | 0.8469559  | 0.6071429 |
| A_51_P1121 | 88.4     | Detected | 100.3    | Detected | 82.6    | Detected   | 100.9    | Detected   | Ahi1          | 1.141402715 | 0.93438914 | 1.00598205 | 0.8235294 |
| A_52_P1155 | 910.4    | Detected | 580.8    | Detected | 906.1   | Detected   | 1039.1   | Detected   | Fbxo45        | 1.141366432 | 0.9952768  | 1.78908402 | 1.5600895 |
| A_52_P1901 | 15904.8  | Detected | 14557.4  | Detected | 18433.6 | Detected   | 18153.2  | Detected   | Clasrp        | 1.141366128 | 1.15899603 | 1.24700839 | 1.2662701 |
| A_51_P3978 | 151.4    | Detected | 147.3    | Detected | 165.2   | Detected   | 172.8    | Detected   | Dpm1          | 1.141347424 | 1.09114927 | 1.17311609 | 1.1215207 |
| A_52_P3775 | 37.5     | Detected | 42       | Detected | 33.7    | Detected   | 42.8     | Not Detect | Eps8l1        | 1.141333333 | 0.89866667 | 1.01904762 | 0.802381  |
| A_55_P2203 | 1125.8   | Detected | 955.6    | Detected | 1135.3  | Detected   | 1284.9   | Detected   | 4932433N03Rik | 1.141321727 | 1.00843844 | 1.34460025 | 1.1880494 |
| A_52_P6510 | 390.1    | Detected | 338.5    | Detected | 566.7   | Detected   | 445.2    | Detected   | Fyttd1        | 1.141245834 | 1.45270443 | 1.31521418 | 1.6741507 |
| A_55_P1976 | 67.3     | Detected | 46.1     | Detected | 59.4    | Detected   | 76.8     | Detected   | Fgf14         | 1.14115899  | 0.88261516 | 1.6659436  | 1.2885033 |
| A_55_P2026 | 41.8     | Detected | 41.8     | Detected | 41.2    | Detected   | 47.7     | Detected   | Usp35         | 1.141148325 | 0.98564593 | 1.14114833 | 0.9856459 |
| A_55_P1954 | 1231.4   | Detected | 1094.2   | Detected | 1765.6  | Detected   | 1405.1   | Detected   | Ttc23         | 1.141058957 | 1.43381517 | 1.28413453 | 1.613599  |
| A_52_P1039 | 46.8     | Detected | 32.6     | Detected | 41.7    | Detected   | 53.4     | Detected   | Slc29a3       | 1.141025641 | 0.89102564 | 1.63803681 | 1.2791411 |
| A_55_P2145 | 22030    | Detected | 23772.5  | Detected | 29740.8 | Detected   | 25136.7  | Detected   | Aen           | 1.141021335 | 1.35001362 | 1.05738563 | 1.251059  |
| A_66_P1185 | 1375.2   | Detected | 973.6    | Detected | 900.3   | Detected   | 1569.1   | Detected   | Atrx          | 1.140997673 | 0.65466841 | 1.61164749 | 0.9247124 |
| A_52_P2558 | 12320.9  | Detected | 11903.5  | Detected | 13353.5 | Detected   | 14057.9  | Detected   | Cbx1          | 1.140979961 | 1.08380881 | 1.18098878 | 1.1218129 |
| A_51_P4218 | 6618.5   | Detected | 8753.4   | Detected | 7468.6  | Detected   | 7551.5   | Detected   | Timm9         | 1.140968497 | 1.128443   | 0.86269335 | 0.8532227 |
| A_52_P6547 | 345.5    | Detected | 354      | Detected | 452.8   | Detected   | 394.2    | Detected   | Trub1         | 1.140955137 | 1.3105644  | 1.11355932 | 1.279096  |
| A_55_P2090 | 921.9    | Detected | 864.4    | Detected | 860.6   | Detected   | 1051.8   | Detected   | Kcna7         | 1.140904653 | 0.93350689 | 1.21679778 | 0.9956039 |
| A_55_P2136 | 141378.5 | Detected | 159683   | Detected | 152361  | Detected   | 161295.3 | Detected   | Rps3a1        | 1.140875734 | 1.07768154 | 1.01009688 | 0.9541467 |
| A_55_P2095 | 19444.3  | Detected | 17144.5  | Detected | 14640.3 | Detected   | 22182.9  | Detected   | Rab3c         | 1.140843332 | 0.75293531 | 1.2938785  | 0.8539357 |
| A_66_P1368 | 346.5    | Detected | 305.3    | Detected | 339.8   | Detected   | 395.3    | Detected   | Usp7          | 1.140836941 | 0.98066378 | 1.29479201 | 1.1130036 |
| A_55_P2055 | 947.3    | Detected | 879.5    | Detected | 919.5   | Detected   | 1080.7   | Detected   | Josd2         | 1.140821282 | 0.97065344 | 1.22876634 | 1.0454804 |
| A_66_P1087 | 61.8     | Detected | 55.6     | Detected | 49.4    | Detected   | 70.5     | Detected   | Arhgef38      | 1.140776699 | 0.79935275 | 1.26798561 | 0.8884892 |
| A_55_P2180 | 95.2     | Detected | 123.9    | Detected | 107.2   | Detected   | 108.6    | Detected   | Vwa8          | 1.140756303 | 1.12605042 | 0.87651332 | 0.8652139 |
| A_55_P2139 | 253277.8 | Detected | 303800.9 | Detected | 282089  | Detected   | 288925.3 | Detected   | Gm12070       | 1.140744669 | 1.11375336 | 0.95103504 | 0.9285325 |
| A_55_P2121 | 4341.5   | Detected | 3626.8   | Detected | 3943.7  | Detected   | 4952.1   | Detected   | Tbc1d22b      | 1.140642635 | 0.90837268 | 1.36541855 | 1.0873773 |
| A_55_P2084 | 25.6     | Detected | 18.3     | Detected | 8.1     | Not Detect | 29.2     | Not Detect | Fam78a        | 1.140625    | 0.31640625 | 1.59562842 | 0.442623  |
| A_51_P1565 | 56.9     | Detected | 50.6     | Detected | 49.9    | Detected   | 64.9     | Detected   | Zfp839        | 1.14059754  | 0.87697715 | 1.2826087  | 0.986166  |
| A_52_P3058 | 17282.1  | Detected | 18667.6  | Detected | 21756.1 | Detected   | 19711.6  | Detected   | Yipf5         | 1.140578981 | 1.25888058 | 1.05592578 | 1.1654471 |

|            |                   |                   |                   |                   |               |             |            |            |           |
|------------|-------------------|-------------------|-------------------|-------------------|---------------|-------------|------------|------------|-----------|
| A_55_P2041 | 31.3 Detected     | 45.3 Detected     | 35.9 Detected     | 35.7 Not Detect   | Chrna6        | 1.14057508  | 1.14696486 | 0.78807947 | 0.7924945 |
| A_51_P1874 | 31.3 Detected     | 54.8 Detected     | 42.4 Detected     | 35.7 Not Detect   | Rel           | 1.14057508  | 1.35463259 | 0.65145985 | 0.7737226 |
| A_51_P3888 | 2930.5 Detected   | 1696 Detected     | 2856.7 Detected   | 3342.3 Detected   | Stap2         | 1.140522095 | 0.97481658 | 1.97069575 | 1.684375  |
| A_55_P2014 | 17.8 Detected     | 26.3 Detected     | 8.6 Not Detect    | 20.3 Not Detect   | Pclo          | 1.140449438 | 0.48314607 | 0.77186312 | 0.3269962 |
| A_52_P2155 | 9561.1 Detected   | 8078.5 Detected   | 29593.6 Detected  | 10903.6 Detected  | Gcnt1         | 1.140412714 | 3.09520871 | 1.34970601 | 3.6632543 |
| A_55_P2043 | 35622 Detected    | 45010 Detected    | 39974.3 Detected  | 40623.2 Detected  | Eif5          | 1.140396384 | 1.12218011 | 0.90253721 | 0.8881204 |
| A_55_P2062 | 159.6 Detected    | 172.8 Detected    | 140 Detected      | 182 Detected      | Shank1        | 1.140350877 | 0.87719298 | 1.05324074 | 0.8101852 |
| A_52_P6565 | 4554.4 Detected   | 3303.7 Detected   | 4409.9 Detected   | 5193.4 Detected   | Pex6          | 1.140303882 | 0.96827244 | 1.57199504 | 1.3348367 |
| A_66_P1161 | 25249.1 Detected  | 21937.6 Detected  | 29340.9 Detected  | 28791.1 Detected  | Psmd13        | 1.140282228 | 1.16205726 | 1.31240883 | 1.3374708 |
| A_66_P1286 | 2204.5 Detected   | 2514.6 Detected   | 2136 Detected     | 2513.7 Detected   | Cinp          | 1.140258562 | 0.96892719 | 0.99964209 | 0.8494393 |
| A_52_P9591 | 1951.4 Detected   | 1706.1 Detected   | 1227 Detected     | 2225.1 Detected   | Ugcg          | 1.140258276 | 0.62877934 | 1.30420257 | 0.7191841 |
| A_55_P1973 | 20623.2 Detected  | 21961.3 Detected  | 22086 Detected    | 23514.1 Detected  | Raf1          | 1.140177082 | 1.07092983 | 1.0707062  | 1.0056782 |
| A_51_P3091 | 57.8 Detected     | 41.4 Detected     | 48.7 Detected     | 65.9 Detected     | Snx20         | 1.140138408 | 0.84256055 | 1.59178744 | 1.1763285 |
| A_55_P2175 | 4573.3 Detected   | 4694.1 Detected   | 4247.9 Detected   | 5213.9 Detected   | Ythdf2        | 1.140073907 | 0.92884788 | 1.11073475 | 0.9049445 |
| A_52_P5857 | 10033.2 Detected  | 8515.1 Detected   | 8558.2 Detected   | 11438.4 Detected  | Gns           | 1.140055017 | 0.85298808 | 1.34330777 | 1.0050616 |
| A_55_P2006 | 5925.3 Detected   | 5506.7 Detected   | 4363.1 Detected   | 6755.1 Detected   | Clip1         | 1.140043542 | 0.7363509  | 1.22670565 | 0.7923257 |
| A_55_P2366 | 95.7 Detected     | 83 Detected       | 82.1 Detected     | 109.1 Detected    | A430088P11Rik | 1.140020899 | 0.85788924 | 1.31445783 | 0.9891566 |
| A_55_P2027 | 137.9 Detected    | 135.3 Detected    | 129.5 Detected    | 157.2 Detected    | Skint10       | 1.13995649  | 0.93908629 | 1.16186253 | 0.9571323 |
| A_55_P2361 | 146.5 Detected    | 132.5 Detected    | 98.4 Detected     | 167 Detected      | Pitpnc1       | 1.139931741 | 0.67167235 | 1.26037736 | 0.7426415 |
| A_55_P2089 | 1321.7 Detected   | 1274 Detected     | 1207.7 Detected   | 1506.6 Detected   | Mtfr11        | 1.139895589 | 0.91374745 | 1.18257457 | 0.9479592 |
| A_51_P1946 | 664.2 Detected    | 567.7 Detected    | 618.7 Detected    | 757.1 Detected    | Tango6        | 1.13986751  | 0.93149654 | 1.33362692 | 1.0898362 |
| A_51_P1951 | 13107.8 Detected  | 11562.1 Detected  | 17411 Detected    | 14941 Detected    | Vps4b         | 1.139855658 | 1.32829308 | 1.2922393  | 1.5058683 |
| A_51_P4841 | 2003.8 Detected   | 2180.1 Detected   | 1652.3 Detected   | 2284 Detected     | Matn2         | 1.139834315 | 0.82458329 | 1.04765836 | 0.757901  |
| A_51_P4263 | 46.5 Detected     | 59.6 Detected     | 25.3 Detected     | 53 Detected       | Cib4          | 1.139784946 | 0.54408602 | 0.88926174 | 0.4244966 |
| A_51_P1041 | 2562.2 Detected   | 1803.8 Detected   | 2622.1 Detected   | 2920.3 Detected   | Fam76b        | 1.139762704 | 1.02337835 | 1.61897106 | 1.4536534 |
| A_55_P2079 | 17984.2 Detected  | 14391.5 Detected  | 13978 Detected    | 20497.6 Detected  | Pls3          | 1.139756008 | 0.7772378  | 1.42428517 | 0.9712678 |
| A_51_P3245 | 95713.6 Detected  | 77260.1 Detected  | 111707.3 Detected | 109090.1 Detected | Ctnna1        | 1.139755479 | 1.16709956 | 1.41198497 | 1.4458602 |
| A_55_P1996 | 72.3 Detected     | 88.3 Detected     | 65.4 Detected     | 82.4 Detected     | Nphs1         | 1.139695712 | 0.90456432 | 0.93318233 | 0.7406569 |
| A_55_P1975 | 18253.9 Detected  | 18307 Detected    | 24329.6 Detected  | 20803.4 Detected  | Dap3          | 1.139668783 | 1.33284394 | 1.13636314 | 1.328978  |
| A_52_P1414 | 637.4 Detected    | 440.3 Detected    | 594.2 Detected    | 726.4 Detected    | Grk5          | 1.139629746 | 0.93222466 | 1.64978424 | 1.3495344 |
| A_52_P3128 | 540.8 Detected    | 506.9 Detected    | 623.2 Detected    | 616.3 Detected    | Smarcc1       | 1.139607988 | 1.15236686 | 1.21582166 | 1.2294338 |
| A_55_P2077 | 2137.6 Detected   | 2607.6 Detected   | 2944.8 Detected   | 2436 Detected     | Rab7i1        | 1.139595808 | 1.37761976 | 0.93419236 | 1.1293143 |
| A_55_P2039 | 148881 Detected   | 127956.8 Detected | 165845.6 Detected | 169656.7 Detected | Ppp1ca        | 1.139545677 | 1.11394738 | 1.32589046 | 1.2961062 |
| A_55_P2004 | 8.6 Not Detect    | 25 Detected       | 8.4 Not Detect    | 9.8 Not Detect    | Car6          | 1.139534884 | 0.97674419 | 0.392      | 0.336     |
| A_51_P3918 | 3996.9 Detected   | 4641.3 Detected   | 3854.7 Detected   | 4554.4 Detected   | Exosc10       | 1.139483099 | 0.96442243 | 0.9812768  | 0.8305216 |
| A_51_P1521 | 3923.3 Detected   | 3580.8 Detected   | 3586.6 Detected   | 4470.5 Detected   | Glt8d1        | 1.139474422 | 0.91417939 | 1.24846403 | 1.0016197 |
| A_55_P2056 | 9518.3 Detected   | 7550.7 Detected   | 12048.9 Detected  | 10845.7 Detected  | Spc24         | 1.139457676 | 1.2658668  | 1.43638338 | 1.5957328 |
| A_55_P2000 | 134718.4 Detected | 146320.8 Detected | 131584.4 Detected | 153503.2 Detected | Arf1          | 1.139437523 | 0.97673666 | 1.04908666 | 0.899287  |
| A_55_P2037 | 128659.1 Detected | 153409.5 Detected | 155707.4 Detected | 146594.4 Detected | Rps15         | 1.139401721 | 1.21023231 | 0.95557576 | 1.0149789 |
| A_55_P1967 | 65.3 Detected     | 93.8 Detected     | 96.2 Detected     | 74.4 Detected     | Bai2          | 1.139356815 | 1.47320061 | 0.79317697 | 1.0255864 |

|            |                  |                  |                  |                  |               |             |            |            |           |
|------------|------------------|------------------|------------------|------------------|---------------|-------------|------------|------------|-----------|
| A_55_P2135 | 224.1 Detected   | 220.2 Detected   | 257.6 Detected   | 255.3 Detected   | C8g           | 1.139223561 | 1.14948684 | 1.15940054 | 1.1698456 |
| A_66_P1370 | 961.2 Detected   | 1132.3 Detected  | 859.9 Detected   | 1094.9 Detected  | 9930014A18Rik | 1.139096962 | 0.8946109  | 0.96696988 | 0.7594277 |
| A_55_P2069 | 3524.4 Detected  | 3185 Detected    | 3428 Detected    | 4014.3 Detected  | Prr11         | 1.139002383 | 0.97264783 | 1.26037677 | 1.0762951 |
| A_55_P1955 | 397.9 Detected   | 383.2 Detected   | 445.3 Detected   | 453.2 Detected   | Olf522        | 1.138979643 | 1.11912541 | 1.18267223 | 1.1620564 |
| A_55_P2118 | 10135.7 Detected | 9839.4 Detected  | 9169.3 Detected  | 11544.2 Detected | Foxj3         | 1.138964255 | 0.90465385 | 1.1732626  | 0.9318963 |
| A_55_P2010 | 105.8 Detected   | 77.7 Detected    | 122.6 Detected   | 120.5 Detected   | Serpina1e     | 1.138941399 | 1.15879017 | 1.55083655 | 1.5778636 |
| A_55_P1970 | 20699.2 Detected | 14427.9 Detected | 20731.2 Detected | 23575.1 Detected | Vopp1         | 1.138937737 | 1.00154595 | 1.63399386 | 1.4368827 |
| A_51_P1843 | 37544.5 Detected | 41191.1 Detected | 38645.5 Detected | 42757.1 Detected | Nr2f6         | 1.138837912 | 1.0293252  | 1.03801792 | 0.9382002 |
| A_55_P2017 | 1131.4 Detected  | 1018.8 Detected  | 964.7 Detected   | 1288.4 Detected  | Abcg4         | 1.13876613  | 0.85266042 | 1.26462505 | 0.9468983 |
| A_55_P1996 | 3788.9 Detected  | 4018.1 Detected  | 3374.5 Detected  | 4314.4 Detected  | Srrm1         | 1.138694608 | 0.89062789 | 1.07374132 | 0.8398248 |
| A_51_P4024 | 10180.7 Detected | 7628.7 Detected  | 12176.6 Detected | 11592.6 Detected | Trap1         | 1.13868398  | 1.19604742 | 1.5196036  | 1.5961566 |
| A_51_P2667 | 33.9 Detected    | 20.2 Detected    | 32.3 Detected    | 38.6 Not Detect  | Dopey1        | 1.138643068 | 0.95280236 | 1.91089109 | 1.5990099 |
| A_52_P4372 | 80691.2 Detected | 81647.8 Detected | 94170.9 Detected | 91878.4 Detected | Rbx1          | 1.138642132 | 1.16705291 | 1.1253016  | 1.1533795 |
| A_55_P2015 | 6289.3 Detected  | 6338.5 Detected  | 6458.4 Detected  | 7161.2 Detected  | BC003331      | 1.13863228  | 1.02688693 | 1.12979412 | 1.0189161 |
| A_55_P2217 | 976.9 Detected   | 735.5 Detected   | 829 Detected     | 1112.2 Detected  | LOC545198     | 1.138499335 | 0.84860272 | 1.51216859 | 1.1271244 |
| A_55_P2020 | 179.8 Detected   | 198.9 Detected   | 281.6 Detected   | 204.7 Detected   | Arl4d         | 1.138487208 | 1.56618465 | 1.02916038 | 1.4157868 |
| A_55_P2118 | 4900.2 Detected  | 4583 Detected    | 5021.3 Detected  | 5578.3 Detected  | Lrp6          | 1.138382107 | 1.02471328 | 1.21717216 | 1.095636  |
| A_51_P1401 | 7225.3 Detected  | 7441.7 Detected  | 7420.6 Detected  | 8224.6 Detected  | Hspb1         | 1.138305676 | 1.02703002 | 1.10520446 | 0.9971646 |
| A_55_P1957 | 2242.2 Detected  | 1956.7 Detected  | 1946.8 Detected  | 2552.3 Detected  | Insig2        | 1.138301668 | 0.86825439 | 1.30439004 | 0.9949405 |
| A_51_P1642 | 19733.3 Detected | 19232.1 Detected | 24143.2 Detected | 22461.8 Detected | Mta2          | 1.138268815 | 1.22347504 | 1.16793278 | 1.2553595 |
| A_55_P1969 | 44206.1 Detected | 47651.4 Detected | 36977.9 Detected | 50315.4 Detected | Tmem97        | 1.138200384 | 0.83648863 | 1.05590602 | 0.7760087 |
| A_51_P4436 | 11605 Detected   | 12053.2 Detected | 15474.7 Detected | 13207.4 Detected | 0610011F06Rik | 1.138078414 | 1.3334511  | 1.0957588  | 1.2838665 |
| A_51_P1088 | 33143.1 Detected | 44020.9 Detected | 36371.7 Detected | 37714.2 Detected | Cops7a        | 1.13792011  | 1.09741394 | 0.85673396 | 0.8262371 |
| A_55_P2006 | 763.8 Detected   | 837.7 Detected   | 887.7 Detected   | 869.1 Detected   | Tmc6          | 1.137863315 | 1.16221524 | 1.03748359 | 1.0596872 |
| A_55_P2085 | 2530 Detected    | 2413.1 Detected  | 2322.3 Detected  | 2878.7 Detected  | Igf1          | 1.137826087 | 0.91790514 | 1.19294683 | 0.9623721 |
| A_55_P1991 | 489.9 Detected   | 422.8 Detected   | 492.7 Detected   | 557.4 Detected   | Lman1l        | 1.137783221 | 1.00571545 | 1.31835383 | 1.1653264 |
| A_55_P2016 | 72907.1 Detected | 70582.6 Detected | 88849.7 Detected | 82951 Detected   | Eif3k         | 1.137762989 | 1.21867006 | 1.17523299 | 1.2588046 |
| A_55_P2017 | 12606.9 Detected | 12092.5 Detected | 11458.6 Detected | 14342.4 Detected | Cep89         | 1.137662709 | 0.90891496 | 1.18605747 | 0.9475791 |
| A_55_P2440 | 359 Detected     | 399.6 Detected   | 399.6 Detected   | 408.4 Detected   | Gabpb2        | 1.137604457 | 1.11309192 | 1.02202202 | 1         |
| A_55_P2007 | 968.9 Detected   | 802.8 Detected   | 968.4 Detected   | 1102.2 Detected  | Ppp1r12a      | 1.137578697 | 0.99948395 | 1.37294469 | 1.206278  |
| A_51_P1362 | 8 Not Detect     | 3.2 Not Detect   | 34.4 Detected    | 9.1 Not Detect   | Ms4a4b        | 1.1375      | 4.3        | 2.84375    | 10.75     |
| A_55_P1963 | 512.3 Detected   | 503.7 Detected   | 612.5 Detected   | 582.7 Detected   | Lctl          | 1.137419481 | 1.19558852 | 1.15683939 | 1.2160016 |
| A_51_P4988 | 57.5 Detected    | 51.7 Detected    | 77.6 Detected    | 65.4 Detected    | Cyp2c37       | 1.137391304 | 1.34956522 | 1.26499033 | 1.5009671 |
| A_51_P3280 | 342.2 Detected   | 260.9 Detected   | 748 Detected     | 389.2 Detected   | Crb3          | 1.137346581 | 2.18585622 | 1.49175929 | 2.8669989 |
| A_55_P2170 | 188.6 Detected   | 159 Detected     | 161.2 Detected   | 214.5 Detected   | Braf          | 1.137327678 | 0.85471898 | 1.3490566  | 1.0138365 |
| A_52_P4060 | 211.2 Detected   | 267.3 Detected   | 151.9 Detected   | 240.2 Detected   | Cdkn2aip      | 1.137310606 | 0.71922348 | 0.89861579 | 0.5682753 |
| A_52_P4189 | 23560.6 Detected | 25942.4 Detected | 25642.6 Detected | 26795.5 Detected | Sec22b        | 1.137301257 | 1.08836787 | 1.03288439 | 0.9884436 |
| A_55_P2108 | 4943.9 Detected  | 5428.7 Detected  | 5534.8 Detected  | 5622.2 Detected  | Galns         | 1.137199377 | 1.11952103 | 1.03564389 | 1.0195443 |
| A_55_P1980 | 2306.2 Detected  | 2332 Detected    | 2263.2 Detected  | 2622.6 Detected  | Kpna6         | 1.137195386 | 0.98135461 | 1.12461407 | 0.9704974 |
| A_52_P4086 | 2502.5 Detected  | 2384.2 Detected  | 3038.4 Detected  | 2845.7 Detected  | Sft2d2        | 1.137142857 | 1.21414585 | 1.19356598 | 1.2743897 |

|            |          |            |          |            |          |            |          |            |               |             |            |            |           |
|------------|----------|------------|----------|------------|----------|------------|----------|------------|---------------|-------------|------------|------------|-----------|
| A_55_P2386 | 1190.9   | Detected   | 1137.8   | Detected   | 839      | Detected   | 1354.2   | Detected   | D130062J10Rik | 1.137123184 | 0.70450919 | 1.1901916  | 0.7373879 |
| A_55_P2161 | 1855.4   | Detected   | 2154.4   | Detected   | 2457.7   | Detected   | 2109.7   | Detected   | Kdelc1        | 1.137059394 | 1.32462003 | 0.97925176 | 1.1407817 |
| A_55_P1994 | 502.2    | Detected   | 419.4    | Detected   | 607.6    | Detected   | 571      | Detected   | Far1          | 1.136997212 | 1.20987654 | 1.36146876 | 1.4487363 |
| A_52_P2272 | 86.2     | Detected   | 84.5     | Detected   | 103.5    | Detected   | 98       | Detected   | Vipr1         | 1.136890951 | 1.20069606 | 1.15976331 | 1.2248521 |
| A_51_P2542 | 85.5     | Detected   | 106.2    | Detected   | 86.2     | Detected   | 97.2     | Detected   | Nxph3         | 1.136842105 | 1.00818713 | 0.91525424 | 0.8116761 |
| A_55_P2005 | 9.5      | Not Detect | 43.7     | Detected   | 3.8      | Not Detect | 10.8     | Not Detect | Adamts8       | 1.136842105 | 0.4        | 0.24713959 | 0.0869565 |
| A_55_P1998 | 3471.4   | Detected   | 4811.5   | Detected   | 4549.2   | Detected   | 3946.4   | Detected   | Rpl17         | 1.136832402 | 1.31047992 | 0.8202016  | 0.9454848 |
| A_55_P2152 | 118.4    | Detected   | 103.9    | Detected   | 108.8    | Detected   | 134.6    | Detected   | Tom1l2        | 1.136824324 | 0.91891892 | 1.29547642 | 1.0471607 |
| A_52_P5381 | 91.4     | Detected   | 73.6     | Detected   | 87.7     | Detected   | 103.9    | Detected   | Cdc14a        | 1.136761488 | 0.9595186  | 1.41168478 | 1.1915761 |
| A_55_P2095 | 11898.7  | Detected   | 13946.7  | Detected   | 10442.7  | Detected   | 13525.7  | Detected   | Sh3bp5l       | 1.136737627 | 0.87763369 | 0.96981365 | 0.7487578 |
| A_55_P2065 | 255.3    | Detected   | 238.7    | Detected   | 224.5    | Detected   | 290.2    | Detected   | Rps15a-ps6    | 1.136701919 | 0.87935762 | 1.21575199 | 0.9405111 |
| A_52_P1280 | 13.9     | Detected   | 9.9      | Not Detect | 5.2      | Not Detect | 15.8     | Not Detect | Kazn          | 1.136690647 | 0.37410072 | 1.5959596  | 0.5252525 |
| A_55_P2100 | 338.8    | Detected   | 329      | Detected   | 381.2    | Detected   | 385.1    | Detected   | Auh           | 1.136658796 | 1.12514758 | 1.17051672 | 1.1586626 |
| A_55_P2148 | 114.9    | Detected   | 106.4    | Detected   | 125.6    | Detected   | 130.6    | Detected   | 2810021J22Rik | 1.136640557 | 1.09312446 | 1.22744361 | 1.1804511 |
| A_55_P2134 | 953.7    | Detected   | 892.5    | Detected   | 680.7    | Detected   | 1084     | Detected   | Zscan22       | 1.136625773 | 0.71374646 | 1.21456583 | 0.7626891 |
| A_55_P2128 | 3328.3   | Detected   | 4011     | Detected   | 3429.9   | Detected   | 3782.9   | Detected   | Rap1a         | 1.136586245 | 1.03052609 | 0.94313139 | 0.8551234 |
| A_52_P4340 | 858.7    | Detected   | 612.8    | Detected   | 666.2    | Detected   | 975.9    | Detected   | Wdr37         | 1.136485385 | 0.77582392 | 1.59252611 | 1.087141  |
| A_51_P1059 | 76.2     | Detected   | 146.3    | Detected   | 171.8    | Detected   | 86.6     | Detected   | Rasl12        | 1.13648294  | 2.25459318 | 0.59193438 | 1.1742994 |
| A_55_P2162 | 100.4    | Detected   | 68.4     | Detected   | 135.6    | Detected   | 114.1    | Detected   | Cacfd1        | 1.136454183 | 1.35059761 | 1.66812865 | 1.9824561 |
| A_55_P2162 | 431.7    | Detected   | 343.2    | Detected   | 418.7    | Detected   | 490.6    | Detected   | Bmx           | 1.136437341 | 0.9698865  | 1.42948718 | 1.2199883 |
| A_55_P2134 | 7405.6   | Detected   | 6078.3   | Detected   | 7465.8   | Detected   | 8415.9   | Detected   | Olfir544      | 1.136423787 | 1.00812898 | 1.38458122 | 1.2282711 |
| A_65_P0745 | 542.7    | Detected   | 511.7    | Detected   | 593.4    | Detected   | 616.7    | Detected   | Brd8          | 1.136355261 | 1.09342178 | 1.20519836 | 1.1596639 |
| A_55_P2027 | 5730.7   | Detected   | 4094.4   | Detected   | 6543     | Detected   | 6511.7   | Detected   | Zfp260        | 1.136283526 | 1.14174534 | 1.59039175 | 1.5980363 |
| A_52_P4769 | 219.4    | Detected   | 116.2    | Detected   | 154.4    | Detected   | 249.3    | Detected   | Chd6          | 1.136280766 | 0.70373747 | 2.1454389  | 1.3287435 |
| A_55_P2042 | 5610.7   | Detected   | 4896.9   | Detected   | 4719.9   | Detected   | 6375.3   | Detected   | Rad50         | 1.136275331 | 0.84123193 | 1.30190529 | 0.9638547 |
| A_51_P3386 | 14333.8  | Detected   | 12453.9  | Detected   | 15488.8  | Detected   | 16286.9  | Detected   | Tmem14c       | 1.136258354 | 1.08057877 | 1.30777507 | 1.2436907 |
| A_55_P2095 | 41.1     | Detected   | 103      | Detected   | 49.7     | Detected   | 46.7     | Detected   | Ccdc65        | 1.136253041 | 1.20924574 | 0.45339806 | 0.4825243 |
| A_66_P1027 | 10734    | Detected   | 9554.2   | Detected   | 11645    | Detected   | 12195.5  | Detected   | Spop          | 1.136156139 | 1.0848705  | 1.27645433 | 1.2188357 |
| A_51_P2034 | 5378.5   | Detected   | 4558.9   | Detected   | 4677.2   | Detected   | 6110.5   | Detected   | Tsg101        | 1.136097425 | 0.86961049 | 1.34034526 | 1.0259492 |
| A_55_P1954 | 260953.1 | Detected   | 271510   | Detected   | 256876.7 | Detected   | 296457   | Detected   | Endov         | 1.136054716 | 0.9843788  | 1.09188244 | 0.946104  |
| A_55_P1972 | 14.7     | Detected   | 20       | Detected   | 15.2     | Not Detect | 16.7     | Not Detect | A530016L24Rik | 1.136054422 | 1.03401361 | 0.835      | 0.76      |
| A_51_P1930 | 876.1    | Detected   | 784.6    | Detected   | 742.5    | Detected   | 995.2    | Detected   | Bbs4          | 1.135943385 | 0.84750599 | 1.26841703 | 0.9463421 |
| A_51_P5209 | 7886     | Detected   | 6233.4   | Detected   | 7588.2   | Detected   | 8957.7   | Detected   | Ccdc97        | 1.135899062 | 0.96223688 | 1.4370488  | 1.2173453 |
| A_55_P2109 | 193257.6 | Detected   | 202945.6 | Detected   | 184024.5 | Detected   | 219512.9 | Detected   | Milr1         | 1.135856494 | 0.95222387 | 1.08163419 | 0.9067676 |
| A_51_P3453 | 1068.8   | Detected   | 1198.9   | Detected   | 1317.4   | Detected   | 1214     | Detected   | Cep76         | 1.135853293 | 1.23259731 | 1.01259488 | 1.0988406 |
| A_55_P2040 | 151.7    | Detected   | 144.5    | Detected   | 159.7    | Detected   | 172.3    | Detected   | Acot5         | 1.135794331 | 1.05273566 | 1.19238754 | 1.1051903 |
| A_55_P1962 | 72268.7  | Detected   | 61160.7  | Detected   | 79008.5  | Detected   | 82078.4  | Detected   | Rnf26         | 1.135739262 | 1.09326029 | 1.34201211 | 1.2918181 |
| A_66_P1105 | 23.6     | Detected   | 21.2     | Detected   | 24       | Detected   | 26.8     | Not Detect | Zfp945        | 1.13559322  | 1.01694915 | 1.26415094 | 1.1320755 |
| A_51_P5031 | 45       | Detected   | 48.9     | Detected   | 48.4     | Detected   | 51.1     | Detected   | Wnt11         | 1.135555556 | 1.07555556 | 1.04498978 | 0.9897751 |
| A_55_P2176 | 34976.4  | Detected   | 45168    | Detected   | 27505.4  | Detected   | 39717.4  | Detected   | Hsph1         | 1.135548541 | 0.78639883 | 0.87932607 | 0.6089577 |



|            |          |          |          |          |          |          |          |          |               |             |            |            |           |
|------------|----------|----------|----------|----------|----------|----------|----------|----------|---------------|-------------|------------|------------|-----------|
| A_52_P3677 | 20931.8  | Detected | 27635.5  | Detected | 24281.3  | Detected | 23769    | Detected | Mri1          | 1.13554496  | 1.16001968 | 0.86008938 | 0.8786271 |
| A_52_P6331 | 9669.3   | Detected | 9921.2   | Detected | 12386.7  | Detected | 10979.1  | Detected | Aasdhppt      | 1.135459651 | 1.28103379 | 1.10663025 | 1.2485082 |
| A_52_P1029 | 199054   | Detected | 149996   | Detected | 217797.5 | Detected | 225994.3 | Detected | Lasp1         | 1.135341666 | 1.09416289 | 1.50666884 | 1.4520221 |
| A_55_P2170 | 229.2    | Detected | 312.8    | Detected | 121      | Detected | 260.2    | Detected | Klra22        | 1.135253054 | 0.52792321 | 0.83184143 | 0.3868286 |
| A_55_P2014 | 1265.2   | Detected | 1447.6   | Detected | 1206     | Detected | 1436.3   | Detected | Hes7          | 1.135235536 | 0.95320898 | 0.99219398 | 0.8331031 |
| A_52_P6294 | 1045.8   | Detected | 1029     | Detected | 917.4    | Detected | 1187.2   | Detected | Gon4l         | 1.135207497 | 0.87722318 | 1.1537415  | 0.8915452 |
| A_55_P2019 | 11996.6  | Detected | 11133.2  | Detected | 12257    | Detected | 13617.6  | Detected | Mocs2         | 1.135121618 | 1.02170615 | 1.22315237 | 1.1009413 |
| A_51_P3286 | 272.4    | Detected | 251.1    | Detected | 215      | Detected | 309.2    | Detected | Tlcd2         | 1.135095448 | 0.78928047 | 1.23138192 | 0.8562326 |
| A_52_P5665 | 8590.9   | Detected | 10229.3  | Detected | 10548.5  | Detected | 9750.9   | Detected | Emc3          | 1.135026598 | 1.22786902 | 0.95323238 | 1.0312045 |
| A_52_P3149 | 1448     | Detected | 1335.9   | Detected | 1273.7   | Detected | 1643.5   | Detected | Vamp3         | 1.135013812 | 0.87962707 | 1.23025676 | 0.9534396 |
| A_52_P2756 | 12694.7  | Detected | 12687.1  | Detected | 10739.8  | Detected | 14408.5  | Detected | Kpnb1         | 1.135001221 | 0.8460066  | 1.13568112 | 0.8465134 |
| A_55_P2008 | 4210.6   | Detected | 3319.2   | Detected | 5880.3   | Detected | 4779     | Detected | Prkcd         | 1.134992638 | 1.39654681 | 1.43980477 | 1.7716016 |
| A_55_P2057 | 20096.5  | Detected | 17383.5  | Detected | 21706.6  | Detected | 22808.5  | Detected | Gtf3c5        | 1.134948872 | 1.08011843 | 1.31207754 | 1.2486898 |
| A_55_P2159 | 41.5     | Detected | 71.1     | Detected | 94.5     | Detected | 47.1     | Detected | Fads6         | 1.134939759 | 2.27710843 | 0.66244726 | 1.3291139 |
| A_55_P1969 | 3006.1   | Detected | 2303.6   | Detected | 3741.3   | Detected | 3411.7   | Detected | Mettl10       | 1.134925651 | 1.24456938 | 1.48102969 | 1.6241101 |
| A_55_P1975 | 39101.3  | Detected | 42350.9  | Detected | 42000.6  | Detected | 44374.2  | Detected | Tmem259       | 1.134852294 | 1.07414843 | 1.04777466 | 0.9917286 |
| A_52_P2563 | 123.1    | Detected | 100.8    | Detected | 76.4     | Detected | 139.7    | Detected | Wdsub1        | 1.134849716 | 0.62063363 | 1.3859127  | 0.7579365 |
| A_55_P2153 | 169.1    | Detected | 137.9    | Detected | 160.6    | Detected | 191.9    | Detected | Snrpc         | 1.134831461 | 0.94973389 | 1.39158811 | 1.164612  |
| A_51_P5022 | 1248.4   | Detected | 585.1    | Detected | 1728.3   | Detected | 1416.7   | Detected | Slc22a4       | 1.13481256  | 1.38441205 | 2.42129551 | 2.953854  |
| A_55_P1978 | 45963.7  | Detected | 43583.3  | Detected | 53666.6  | Detected | 52159.8  | Detected | Incenp        | 1.134804204 | 1.1675866  | 1.19678409 | 1.231357  |
| A_66_P1189 | 5829     | Detected | 6337.7   | Detected | 4848.4   | Detected | 6614.7   | Detected | Plaa          | 1.134791559 | 0.83177217 | 1.04370671 | 0.7650094 |
| A_66_P1204 | 1547.6   | Detected | 1341.8   | Detected | 1843.7   | Detected | 1756.2   | Detected | Mbtd1         | 1.134789351 | 1.19132851 | 1.30883887 | 1.3740498 |
| A_55_P2009 | 111.3    | Detected | 88       | Detected | 82.5     | Detected | 126.3    | Detected | Gm5113        | 1.134770889 | 0.74123989 | 1.43522727 | 0.9375    |
| A_52_P6646 | 161.8    | Detected | 98.6     | Detected | 189      | Detected | 183.6    | Detected | Acvr2a        | 1.13473424  | 1.16810878 | 1.86206897 | 1.9168357 |
| A_55_P2047 | 208902.8 | Detected | 213136.2 | Detected | 226415.1 | Detected | 237028   | Detected | Calm1         | 1.134632949 | 1.0838299  | 1.1120964  | 1.0623024 |
| A_51_P3841 | 10741.2  | Detected | 7687     | Detected | 10186    | Detected | 12187    | Detected | Ryk           | 1.13460321  | 0.94831118 | 1.58540393 | 1.3250943 |
| A_51_P4188 | 143.4    | Detected | 114.2    | Detected | 178.9    | Detected | 162.7    | Detected | Airn          | 1.134588563 | 1.24755927 | 1.42469352 | 1.5665499 |
| A_55_P2010 | 27986.3  | Detected | 29703    | Detected | 31728.2  | Detected | 31752.1  | Detected | Mrps23        | 1.134558695 | 1.13370471 | 1.0689863  | 1.0681817 |
| A_55_P2017 | 330.3    | Detected | 327.5    | Detected | 291.4    | Detected | 374.7    | Detected | Gm2138        | 1.134423252 | 0.88222828 | 1.14412214 | 0.889771  |
| A_55_P2036 | 135.4    | Detected | 137.4    | Detected | 92.5     | Detected | 153.6    | Detected | Wbscr27       | 1.134416544 | 0.683161   | 1.11790393 | 0.6732169 |
| A_52_P5065 | 497      | Detected | 359.1    | Detected | 426.8    | Detected | 563.8    | Detected | Rabgap1l      | 1.134406439 | 0.85875252 | 1.5700362  | 1.1885269 |
| A_52_P2575 | 18225.4  | Detected | 14669.7  | Detected | 16127.2  | Detected | 20675    | Detected | 1110065P20Rik | 1.134405829 | 0.88487495 | 1.40936761 | 1.0993545 |
| A_51_P1847 | 1041     | Detected | 732.6    | Detected | 1032.1   | Detected | 1180.9   | Detected | Zfp101        | 1.13439001  | 0.99145053 | 1.61193011 | 1.4088179 |
| A_55_P2053 | 3589.6   | Detected | 3183.5   | Detected | 3531.3   | Detected | 4071.8   | Detected | Olf1368       | 1.134332516 | 0.98375864 | 1.27903251 | 1.1092508 |
| A_55_P1976 | 3241.8   | Detected | 3544.6   | Detected | 2770.7   | Detected | 3677.1   | Detected | Vrk2          | 1.134277253 | 0.8546795  | 1.0373808  | 0.7816679 |
| A_55_P2095 | 12269.6  | Detected | 14327.2  | Detected | 14987.3  | Detected | 13916.2  | Detected | Glxr2         | 1.134201604 | 1.22149866 | 0.97131331 | 1.0460732 |
| A_52_P2415 | 53.7     | Detected | 60.9     | Detected | 57.6     | Detected | 60.9     | Detected | Supt7l        | 1.134078212 | 1.0726257  | 1          | 0.9458128 |
| A_55_P2072 | 2521.2   | Detected | 2630.4   | Detected | 2629.4   | Detected | 2859.1   | Detected | Sirt6         | 1.134023481 | 1.04291607 | 1.08694495 | 0.9996198 |
| A_51_P4809 | 14782.1  | Detected | 14153.3  | Detected | 15319.9  | Detected | 16762.8  | Detected | Glo1          | 1.13399314  | 1.03638184 | 1.18437396 | 1.082426  |
| A_52_P5560 | 1217.3   | Detected | 882.5    | Detected | 772.7    | Detected | 1380.4   | Detected | Trmt2b        | 1.133985049 | 0.63476546 | 1.56419263 | 0.8755807 |

|            |          |          |          |          |          |          |          |            |               |             |            |            |           |
|------------|----------|----------|----------|----------|----------|----------|----------|------------|---------------|-------------|------------|------------|-----------|
| A_52_P3789 | 36041.6  | Detected | 35568.2  | Detected | 46325.9  | Detected | 40870.6  | Detected   | Cox7a2        | 1.133984063 | 1.28534527 | 1.14907698 | 1.3024528 |
| A_51_P2317 | 194.1    | Detected | 199.7    | Detected | 263.2    | Detected | 220.1    | Detected   | 2310035C23Rik | 1.133951571 | 1.35600206 | 1.10215323 | 1.317977  |
| A_66_P1396 | 39.6     | Detected | 37.1     | Detected | 45.2     | Detected | 44.9     | Not Detect | Gm12409       | 1.133838384 | 1.14141414 | 1.21024259 | 1.2183288 |
| A_51_P4181 | 19405    | Detected | 16454.9  | Detected | 19248.7  | Detected | 22001.2  | Detected   | Manf          | 1.13379026  | 0.99194537 | 1.33706069 | 1.1697853 |
| A_51_P3773 | 8014.6   | Detected | 10702.8  | Detected | 9296.1   | Detected | 9086.8   | Detected   | Gnl3          | 1.13378085  | 1.15989569 | 0.84901147 | 0.8685671 |
| A_51_P5080 | 1831.9   | Detected | 1626.8   | Detected | 2507.9   | Detected | 2076.9   | Detected   | Pcyox1        | 1.133740925 | 1.36901578 | 1.27667814 | 1.5416154 |
| A_66_P1276 | 37.4     | Detected | 27.8     | Detected | 32.2     | Detected | 42.4     | Not Detect | Taar7f        | 1.13368984  | 0.86096257 | 1.52517986 | 1.1582734 |
| A_55_P2066 | 35963    | Detected | 25495.5  | Detected | 22596.7  | Detected | 40770.7  | Detected   | Trim47        | 1.13368462  | 0.6283319  | 1.59913318 | 0.8863015 |
| A_55_P2087 | 211      | Detected | 189.6    | Detected | 260.9    | Detected | 239.2    | Detected   | Clpsl2        | 1.133649289 | 1.23649289 | 1.26160338 | 1.3760549 |
| A_55_P2027 | 279.9    | Detected | 279.1    | Detected | 233.6    | Detected | 317.3    | Detected   | Krtap20-2     | 1.13361915  | 0.83458378 | 1.13686851 | 0.836976  |
| A_51_P3724 | 4819.7   | Detected | 4760.4   | Detected | 5447.1   | Detected | 5463.2   | Detected   | Auh           | 1.133514534 | 1.13017408 | 1.14763465 | 1.1442526 |
| A_55_P2084 | 41.2     | Detected | 39.9     | Detected | 35.5     | Detected | 46.7     | Not Detect | Gm10814       | 1.133495146 | 0.86165049 | 1.17042607 | 0.8897243 |
| A_55_P1974 | 72297.9  | Detected | 67403.5  | Detected | 80305.9  | Detected | 81941.8  | Detected   | Ndufab1       | 1.13339115  | 1.11076394 | 1.21569058 | 1.1914203 |
| A_55_P2001 | 3570.4   | Detected | 3256.6   | Detected | 4589.4   | Detected | 4046.6   | Detected   | Uros          | 1.133374412 | 1.2854022  | 1.24258429 | 1.4092612 |
| A_55_P2208 | 121.5    | Detected | 110.2    | Detected | 97.4     | Detected | 137.7    | Detected   | 6820426E19Rik | 1.133333333 | 0.80164609 | 1.24954628 | 0.8838475 |
| A_55_P1974 | 2745.4   | Detected | 2358.3   | Detected | 2374.2   | Detected | 3111.2   | Detected   | Fam126b       | 1.133241058 | 0.86479202 | 1.3192554  | 1.0067421 |
| A_66_P1114 | 381.4    | Detected | 315.3    | Detected | 318      | Detected | 432.2    | Detected   | 1700018A04Rik | 1.133193498 | 0.83377032 | 1.37075801 | 1.0085633 |
| A_55_P2292 | 95.4     | Detected | 90.8     | Detected | 142.1    | Detected | 108.1    | Detected   | A930037H05Rik | 1.13312369  | 1.48951782 | 1.19052863 | 1.564978  |
| A_51_P4745 | 30.8     | Detected | 27.8     | Detected | 28.5     | Detected | 34.9     | Not Detect | Cyp19a1       | 1.133116883 | 0.92532468 | 1.25539568 | 1.0251799 |
| A_51_P5078 | 1130     | Detected | 941.8    | Detected | 1029.9   | Detected | 1280.3   | Detected   | Gcc1          | 1.13300885  | 0.91141593 | 1.35941814 | 1.0935443 |
| A_65_P0232 | 1292     | Detected | 1436.2   | Detected | 1094.9   | Detected | 1463.8   | Detected   | Usp36         | 1.132972136 | 0.84744582 | 1.01921738 | 0.762359  |
| A_51_P1607 | 26943.3  | Detected | 25739.9  | Detected | 35392.7  | Detected | 30524.9  | Detected   | Ndufb3        | 1.132931007 | 1.3135993  | 1.18589816 | 1.3750131 |
| A_55_P2253 | 398.1    | Detected | 385.3    | Detected | 294.8    | Detected | 451      | Detected   | Luc7l3        | 1.132881186 | 0.74051746 | 1.17051648 | 0.7651181 |
| A_51_P3007 | 38892.9  | Detected | 51248.1  | Detected | 37675.3  | Detected | 44059.8  | Detected   | Srm           | 1.13284944  | 0.96869351 | 0.85973529 | 0.7351551 |
| A_55_P2077 | 7978.3   | Detected | 8206     | Detected | 7176.8   | Detected | 9038.2   | Detected   | Epas1         | 1.13284785  | 0.89954    | 1.1014136  | 0.8745796 |
| A_51_P3248 | 403819.8 | Detected | 413125.2 | Detected | 465435.1 | Detected | 457463.5 | Detected   | Krt18         | 1.132840688 | 1.15258118 | 1.10732412 | 1.12662   |
| A_55_P2001 | 4352.1   | Detected | 3869.4   | Detected | 5213.9   | Detected | 4929.6   | Detected   | Copg2         | 1.132694561 | 1.19801935 | 1.27399597 | 1.3474699 |
| A_55_P2036 | 16748.8  | Detected | 16059.2  | Detected | 21587.9  | Detected | 18971    | Detected   | Mrps14        | 1.132678162 | 1.28892219 | 1.18131663 | 1.34427   |
| A_55_P2101 | 4469.3   | Detected | 3791.1   | Detected | 3202.2   | Detected | 5062.1   | Detected   | Spryd3        | 1.132638221 | 0.71648804 | 1.3352589  | 0.8446625 |
| A_66_P1396 | 3148.3   | Detected | 2787.2   | Detected | 3054.8   | Detected | 3565.7   | Detected   | Ppp2r5c       | 1.132579487 | 0.97030143 | 1.27931257 | 1.0960103 |
| A_55_P2029 | 22147.8  | Detected | 26015.5  | Detected | 19162    | Detected | 25082.4  | Detected   | Hnrnpa1       | 1.132500745 | 0.86518751 | 0.96413292 | 0.7365609 |
| A_55_P2056 | 14920    | Detected | 9023.4   | Detected | 21626.7  | Detected | 16896.6  | Detected   | Mgst3         | 1.132479893 | 1.44951072 | 1.87253142 | 2.3967352 |
| A_55_P2305 | 1569.4   | Detected | 1776.9   | Detected | 1546     | Detected | 1777.3   | Detected   | Ptpn21        | 1.132471008 | 0.98508984 | 1.00022511 | 0.8700546 |
| A_52_P3661 | 3975.3   | Detected | 3927.7   | Detected | 4004.4   | Detected | 4501.9   | Detected   | Tmem55b       | 1.13246799  | 1.0073202  | 1.14619243 | 1.019528  |
| A_55_P2128 | 11854.7  | Detected | 12323.3  | Detected | 11432.2  | Detected | 13425    | Detected   | Trappc13      | 1.13246223  | 0.96436013 | 1.08939975 | 0.9276898 |
| A_52_P3050 | 1409     | Detected | 1415.9   | Detected | 1205.6   | Detected | 1595.6   | Detected   | Pias1         | 1.132434351 | 0.8556423  | 1.12691574 | 0.8514726 |
| A_55_P2086 | 27556.5  | Detected | 44389.2  | Detected | 24338.8  | Detected | 31205.6  | Detected   | Ppid          | 1.132422477 | 0.88323263 | 0.70299983 | 0.5483045 |
| A_55_P1967 | 587.6    | Detected | 625.7    | Detected | 502.1    | Detected | 665.4    | Detected   | Thoc7         | 1.132402995 | 0.85449285 | 1.06344894 | 0.8024612 |
| A_52_P2817 | 332.4    | Detected | 140.3    | Detected | 351      | Detected | 376.4    | Detected   | Wdr5b         | 1.132370638 | 1.05595668 | 2.68282252 | 2.5017819 |
| A_52_P6368 | 11106.6  | Detected | 9394     | Detected | 11319.2  | Detected | 12575.5  | Detected   | G3bp2         | 1.132254695 | 1.01914177 | 1.33867362 | 1.2049393 |

|            |                   |                   |                   |                   |               |             |            |            |           |
|------------|-------------------|-------------------|-------------------|-------------------|---------------|-------------|------------|------------|-----------|
| A_55_P2036 | 46.9 Detected     | 47.5 Detected     | 49.6 Detected     | 53.1 Detected     | Cox17         | 1.132196162 | 1.0575693  | 1.11789474 | 1.0442105 |
| A_55_P2012 | 99.1 Detected     | 129.3 Detected    | 95.4 Detected     | 112.2 Detected    | Sox1          | 1.132189707 | 0.96266398 | 0.86774942 | 0.737819  |
| A_55_P2048 | 15697.1 Detected  | 7916.8 Detected   | 20681.6 Detected  | 17771.2 Detected  | Cd82          | 1.132132687 | 1.31754273 | 2.24474535 | 2.6123686 |
| A_52_P1710 | 1162.5 Detected   | 997.8 Detected    | 1369.1 Detected   | 1316.1 Detected   | Mcmbp         | 1.132129032 | 1.17772043 | 1.3190018  | 1.3721187 |
| A_55_P1998 | 37.1 Detected     | 11.2 Not Detect   | 33.1 Detected     | 42 Not Detect     | 9630028104Rik | 1.132075472 | 0.89218329 | 3.75       | 2.9553571 |
| A_55_P2209 | 357.4 Detected    | 350.1 Detected    | 339.2 Detected    | 404.6 Detected    | Pou2f1        | 1.132064913 | 0.94907666 | 1.15566981 | 0.968866  |
| A_52_P6026 | 4220.2 Detected   | 3525.1 Detected   | 4580.3 Detected   | 4777.5 Detected   | Serpnb6d      | 1.132055353 | 1.08532771 | 1.3552807  | 1.299339  |
| A_55_P2129 | 16327.1 Detected  | 15198.9 Detected  | 17008.7 Detected  | 18482.5 Detected  | Pkp3          | 1.132013646 | 1.04174654 | 1.21604195 | 1.1190744 |
| A_55_P2173 | 8693.9 Detected   | 8850.8 Detected   | 8969.9 Detected   | 9841.6 Detected   | Dnajc8        | 1.1320121   | 1.0317464  | 1.11194468 | 1.0134564 |
| A_55_P2160 | 1965.1 Detected   | 1639.7 Detected   | 2549.2 Detected   | 2224.4 Detected   | Nipa2         | 1.131952572 | 1.29723678 | 1.35658962 | 1.5546746 |
| A_55_P2131 | 14317.5 Detected  | 11925.8 Detected  | 12722.3 Detected  | 16206.4 Detected  | D4Wsu53e      | 1.131929457 | 0.8885839  | 1.35893609 | 1.066788  |
| A_55_P2159 | 683.8 Detected    | 598.5 Detected    | 774.4 Detected    | 774 Detected      | Zfp59         | 1.131909915 | 1.13249488 | 1.29323308 | 1.2939014 |
| A_55_P2099 | 2635.4 Detected   | 2218.8 Detected   | 1853.4 Detected   | 2982.8 Detected   | Bdp1          | 1.131820596 | 0.70327085 | 1.34433027 | 0.8353164 |
| A_55_P2049 | 7527.9 Detected   | 7648.6 Detected   | 7472.3 Detected   | 8520.2 Detected   | Mapkapk5      | 1.13181631  | 0.99261414 | 1.1139555  | 0.97695   |
| A_55_P2169 | 447 Detected      | 428.3 Detected    | 507.2 Detected    | 505.9 Detected    | 4732491K20Rik | 1.131767338 | 1.13467562 | 1.18118141 | 1.1842167 |
| A_51_P4199 | 2241.3 Detected   | 2055.1 Detected   | 2266.4 Detected   | 2536.5 Detected   | Arhgef40      | 1.131709276 | 1.01119886 | 1.23424651 | 1.1028174 |
| A_52_P2567 | 441.3 Detected    | 341.6 Detected    | 402.6 Detected    | 499.4 Detected    | Rhbdl1        | 1.13165647  | 0.91230455 | 1.46194379 | 1.1785714 |
| A_51_P2789 | 1579.9 Detected   | 1778.3 Detected   | 1339.9 Detected   | 1787.9 Detected   | Swap70        | 1.131653902 | 0.84809165 | 1.00539841 | 0.7534724 |
| A_51_P1656 | 171.7 Detected    | 254.6 Detected    | 237.8 Detected    | 194.3 Detected    | Lbx2          | 1.131624927 | 1.38497379 | 0.76315789 | 0.9340141 |
| A_66_P1001 | 11691.9 Detected  | 14463.8 Detected  | 11864.1 Detected  | 13230.2 Detected  | Cfl2          | 1.131569719 | 1.01472815 | 0.91471121 | 0.8202616 |
| A_66_P1206 | 66.9 Detected     | 72.5 Detected     | 353.2 Detected    | 75.7 Detected     | Fbxo34        | 1.131539611 | 5.27952167 | 1.04413793 | 4.8717241 |
| A_55_P2017 | 9793.9 Detected   | 8808.1 Detected   | 12104.9 Detected  | 11081.6 Detected  | Kat5          | 1.131479799 | 1.2359632  | 1.25811469 | 1.3742918 |
| A_51_P3684 | 4159.9 Detected   | 4335.7 Detected   | 5800.2 Detected   | 4706.5 Detected   | 1700123O20Rik | 1.131397389 | 1.39431236 | 1.08552252 | 1.3377771 |
| A_55_P2017 | 127.9 Detected    | 120.9 Detected    | 103.5 Detected    | 144.7 Detected    | Tdp1          | 1.131352619 | 0.80922596 | 1.19685691 | 0.8560794 |
| A_55_P2144 | 92.9 Detected     | 78.7 Detected     | 73.1 Detected     | 105.1 Detected    | Stard7        | 1.131324004 | 0.7868676  | 1.33545108 | 0.9288437 |
| A_51_P5046 | 839.4 Detected    | 740.9 Detected    | 904.5 Detected    | 949.5 Detected    | Mef2d         | 1.131165118 | 1.0775554  | 1.28154947 | 1.2208125 |
| A_52_P4496 | 1829.8 Detected   | 1942.8 Detected   | 1912.7 Detected   | 2069.8 Detected   | Ankrd13c      | 1.131161876 | 1.0453055  | 1.06536957 | 0.9845069 |
| A_55_P1984 | 225.7 Detected    | 231.2 Detected    | 229.7 Detected    | 255.3 Detected    | Cdan1         | 1.131147541 | 1.01772264 | 1.10423875 | 0.9935121 |
| A_52_P5625 | 3665.4 Detected   | 3561 Detected     | 4183.2 Detected   | 4146.1 Detected   | Tpgs1         | 1.131145305 | 1.14126698 | 1.16430778 | 1.1747262 |
| A_66_P1228 | 313164.1 Detected | 327626.3 Detected | 299151.3 Detected | 354228.4 Detected | Gm8526        | 1.131127099 | 0.95525413 | 1.08119647 | 0.913087  |
| A_51_P1001 | 5188.7 Detected   | 4786.1 Detected   | 4332.9 Detected   | 5868.8 Detected   | Mns1          | 1.131073294 | 0.83506466 | 1.22621759 | 0.9053091 |
| A_55_P2055 | 25.2 Detected     | 36.6 Detected     | 30.7 Detected     | 28.5 Not Detect   | D930048G16Rik | 1.130952381 | 1.21825397 | 0.77868852 | 0.8387978 |
| A_55_P2023 | 52.7 Detected     | 56.5 Detected     | 52.3 Detected     | 59.6 Detected     | LOC101056583  | 1.130929791 | 0.99240987 | 1.05486726 | 0.9256637 |
| A_55_P2020 | 243.7 Detected    | 299.1 Detected    | 252.3 Detected    | 275.6 Detected    | E2f7          | 1.130898646 | 1.03528929 | 0.92143096 | 0.8435306 |
| A_55_P1993 | 105331.4 Detected | 117173.9 Detected | 91866 Detected    | 119113.3 Detected | Aimp2         | 1.130843224 | 0.87216158 | 1.01655147 | 0.7840142 |
| A_52_P1806 | 565 Detected      | 521.2 Detected    | 516.2 Detected    | 638.9 Detected    | Txlng         | 1.13079646  | 0.91362832 | 1.22582502 | 0.9904068 |
| A_51_P3249 | 9611.7 Detected   | 8051.1 Detected   | 7640.8 Detected   | 10868.6 Detected  | Man2a1        | 1.13076771  | 0.79494782 | 1.34995218 | 0.949038  |
| A_51_P4816 | 2125.3 Detected   | 2023.2 Detected   | 2063.6 Detected   | 2403.2 Detected   | Zfp787        | 1.130758011 | 0.9709688  | 1.18782127 | 1.0199684 |
| A_51_P3284 | 2572 Detected     | 1524.4 Detected   | 2361.3 Detected   | 2908.3 Detected   | 1700025G04Rik | 1.130754277 | 0.91807932 | 1.90783259 | 1.5490029 |
| A_55_P2122 | 593.5 Detected    | 581.6 Detected    | 603.2 Detected    | 671.1 Detected    | Ubr2          | 1.130749789 | 1.01634372 | 1.15388583 | 1.0371389 |

|            |                   |                   |                   |                   |               |             |            |            |           |
|------------|-------------------|-------------------|-------------------|-------------------|---------------|-------------|------------|------------|-----------|
| A_55_P2011 | 1125.2 Detected   | 1235 Detected     | 1139.9 Detected   | 1272.3 Detected   | Cdk2          | 1.130732314 | 1.01306434 | 1.03020243 | 0.922996  |
| A_55_P2159 | 5266.8 Detected   | 6592.2 Detected   | 5936.4 Detected   | 5955.3 Detected   | Tatdn2        | 1.130724539 | 1.12713602 | 0.90338582 | 0.9005188 |
| A_55_P2003 | 15518.8 Detected  | 14896.9 Detected  | 17666.1 Detected  | 17546.7 Detected  | Rnf7          | 1.130673763 | 1.13836766 | 1.17787593 | 1.185891  |
| A_52_P3305 | 8155.1 Detected   | 5081.7 Detected   | 8725 Detected     | 9219.7 Detected   | Mis18a        | 1.130544077 | 1.06988265 | 1.81429443 | 1.7169451 |
| A_55_P1954 | 52.1 Detected     | 41.6 Detected     | 47.6 Detected     | 58.9 Detected     | D3Bwg0562e    | 1.130518234 | 0.91362764 | 1.41586538 | 1.1442308 |
| A_51_P1286 | 81.3 Detected     | 94.3 Detected     | 85.9 Detected     | 91.9 Detected     | Slc16a8       | 1.130381304 | 1.05658057 | 0.97454931 | 0.9109226 |
| A_52_P2390 | 5153.3 Detected   | 4741.6 Detected   | 5458.1 Detected   | 5825.1 Detected   | Zfp148        | 1.130363068 | 1.05914657 | 1.22850936 | 1.1511093 |
| A_51_P1757 | 22442.3 Detected  | 19317.6 Detected  | 18596 Detected    | 25367.8 Detected  | Flii          | 1.130356514 | 0.82861382 | 1.31319626 | 0.9626455 |
| A_55_P2068 | 109.7 Detected    | 142 Detected      | 35.6 Detected     | 124 Detected      | Hspa1a        | 1.130355515 | 0.32452142 | 0.87323944 | 0.2507042 |
| A_55_P1981 | 3673.2 Detected   | 3011.4 Detected   | 3467.5 Detected   | 4152 Detected     | Rreb1         | 1.130349559 | 0.94399978 | 1.37876071 | 1.1514578 |
| A_55_P2067 | 1720 Detected     | 1898.1 Detected   | 1404.6 Detected   | 1944.2 Detected   | Gmeb1         | 1.130348837 | 0.81662791 | 1.02428745 | 0.7400032 |
| A_55_P2001 | 38443.9 Detected  | 35028.3 Detected  | 40174.1 Detected  | 43455 Detected    | Lrrc19        | 1.130348378 | 1.04500584 | 1.24056834 | 1.1469041 |
| A_55_P2021 | 128.9 Detected    | 75.3 Detected     | 162.4 Detected    | 145.7 Detected    | Dyrk1b        | 1.130333592 | 1.25989139 | 1.93492696 | 2.1567065 |
| A_52_P3596 | 4961.4 Detected   | 4798.9 Detected   | 3330.2 Detected   | 5608 Detected     | Luzp1         | 1.130326118 | 0.67122183 | 1.16860114 | 0.6939507 |
| A_55_P2103 | 56.1 Detected     | 50.8 Detected     | 47.3 Detected     | 63.4 Detected     | Gm10362       | 1.130124777 | 0.84313725 | 1.2480315  | 0.9311024 |
| A_51_P3450 | 26411.9 Detected  | 34166.6 Detected  | 28622.3 Detected  | 29846.9 Detected  | Metap2        | 1.130055013 | 1.08368955 | 0.87356951 | 0.8377275 |
| A_51_P1360 | 216.3 Detected    | 176.5 Detected    | 283 Detected      | 244.4 Detected    | Ube2v2        | 1.129912159 | 1.30836801 | 1.38470255 | 1.6033994 |
| A_51_P4873 | 7032.6 Detected   | 6140.8 Detected   | 8739.5 Detected   | 7946 Detected     | Pstk          | 1.129880841 | 1.24271251 | 1.29396821 | 1.4231859 |
| A_55_P2054 | 3066.6 Detected   | 2432.1 Detected   | 2705.5 Detected   | 3464.5 Detected   | Rbm6          | 1.129752821 | 0.88224744 | 1.42448912 | 1.1124131 |
| A_55_P1991 | 840.1 Detected    | 676 Detected      | 565 Detected      | 949.1 Detected    | Iqsec2        | 1.129746459 | 0.67253898 | 1.40399408 | 0.8357988 |
| A_52_P5777 | 37 Detected       | 107 Detected      | 88.9 Detected     | 41.8 Not Detect   | Lpxn          | 1.12972973  | 2.4027027  | 0.39065421 | 0.8308411 |
| A_51_P5092 | 1705.9 Detected   | 1470.4 Detected   | 1684.5 Detected   | 1927.2 Detected   | Tnrc6a        | 1.129726244 | 0.9874553  | 1.31066376 | 1.1456066 |
| A_51_P2923 | 143792.1 Detected | 164036.1 Detected | 143461.5 Detected | 162444.7 Detected | Rps3a1        | 1.129719227 | 0.99770085 | 0.99029848 | 0.8745727 |
| A_66_P1121 | 3151.7 Detected   | 3723.3 Detected   | 4215.1 Detected   | 3560.4 Detected   | Rab7i1        | 1.129676048 | 1.33740521 | 0.95624849 | 1.1320871 |
| A_52_P5903 | 11072.6 Detected  | 10968.3 Detected  | 9853.9 Detected   | 12508.4 Detected  | Rab10         | 1.129671441 | 0.88993552 | 1.14041374 | 0.8983981 |
| A_51_P1843 | 29277.9 Detected  | 35649.8 Detected  | 31757.1 Detected  | 33071.9 Detected  | Aimp1         | 1.129585797 | 1.0846782  | 0.92768823 | 0.8908072 |
| A_55_P2037 | 26990.6 Detected  | 21447.3 Detected  | 22706.6 Detected  | 30486.4 Detected  | Cttn          | 1.129519166 | 0.84127807 | 1.42145631 | 1.058716  |
| A_55_P1964 | 80066.6 Detected  | 66243.5 Detected  | 96880 Detected    | 90434.1 Detected  | Ndufs6        | 1.129485953 | 1.20999268 | 1.36517696 | 1.4624831 |
| A_55_P2065 | 21794.7 Detected  | 20972 Detected    | 27514.3 Detected  | 24616.2 Detected  | Gm5848        | 1.129458079 | 1.26243077 | 1.17376502 | 1.311954  |
| A_51_P3221 | 368.8 Detected    | 458.9 Detected    | 377.9 Detected    | 416.5 Detected    | Rab10os       | 1.129338395 | 1.02467462 | 0.90760514 | 0.823491  |
| A_51_P4849 | 5505.9 Detected   | 6039.5 Detected   | 5671.1 Detected   | 6217.7 Detected   | Polrmt        | 1.1292795   | 1.03000418 | 1.02950575 | 0.9390016 |
| A_55_P2201 | 244.5 Detected    | 250.5 Detected    | 221.6 Detected    | 276.1 Detected    | 2310047N11Rik | 1.129243354 | 0.90633947 | 1.10219561 | 0.8846307 |
| A_51_P4036 | 11334.7 Detected  | 9610.5 Detected   | 11886.7 Detected  | 12799.6 Detected  | Uba5          | 1.129240297 | 1.04870001 | 1.33183497 | 1.2368451 |
| A_55_P2159 | 195.9 Detected    | 203.7 Detected    | 239.5 Detected    | 221.2 Detected    | Mob1a         | 1.129147524 | 1.22256253 | 1.08591065 | 1.1757486 |
| A_51_P3947 | 6729.4 Detected   | 7565.9 Detected   | 6201.6 Detected   | 7598 Detected     | Kti12         | 1.1290754   | 0.92156804 | 1.00424272 | 0.8196778 |
| A_52_P5950 | 402.1 Detected    | 424.5 Detected    | 444.7 Detected    | 454 Detected      | Vps72         | 1.12907237  | 1.1059438  | 1.06949352 | 1.0475854 |
| A_51_P3922 | 1570.9 Detected   | 1921.7 Detected   | 1235.4 Detected   | 1773.6 Detected   | Pcnx14        | 1.129034312 | 0.78642816 | 0.92293282 | 0.6428683 |
| A_52_P5619 | 6016.2 Detected   | 4944.1 Detected   | 6528.7 Detected   | 6791.9 Detected   | Sptssa        | 1.128935208 | 1.08518666 | 1.3737384  | 1.3205032 |
| A_66_P1016 | 419973.7 Detected | 443124 Detected   | 306397.8 Detected | 474120.6 Detected | COX1          | 1.128929264 | 0.72956426 | 1.06995017 | 0.6914493 |
| A_55_P2140 | 9548.6 Detected   | 9556.9 Detected   | 11404.2 Detected  | 10779.5 Detected  | Pex13         | 1.12890895  | 1.19433215 | 1.12792851 | 1.1932949 |

|            |          |          |          |            |          |            |          |            |               |             |            |            |           |
|------------|----------|----------|----------|------------|----------|------------|----------|------------|---------------|-------------|------------|------------|-----------|
| A_55_P2328 | 39.6     | Detected | 64.3     | Detected   | 29.3     | Detected   | 44.7     | Detected   | A530064N14Rik | 1.128787879 | 0.73989899 | 0.69517885 | 0.4556765 |
| A_55_P2016 | 125.8    | Detected | 168.3    | Detected   | 124      | Detected   | 142      | Detected   | Cdk1          | 1.128775835 | 0.98569157 | 0.84373143 | 0.7367796 |
| A_51_P2628 | 78247.9  | Detected | 80509.8  | Detected   | 88954.1  | Detected   | 88310.4  | Detected   | Tmed9         | 1.1285977   | 1.13682412 | 1.09689007 | 1.1048854 |
| A_55_P2089 | 6076.9   | Detected | 5605     | Detected   | 7203.5   | Detected   | 6858.3   | Detected   | Rnf121        | 1.128585298 | 1.18539058 | 1.22360393 | 1.2851918 |
| A_55_P2052 | 11379    | Detected | 10701.9  | Detected   | 11223.9  | Detected   | 12841.9  | Detected   | Sepw1         | 1.128561385 | 0.98636963 | 1.19996449 | 1.0487764 |
| A_51_P3514 | 2264.7   | Detected | 2525.2   | Detected   | 2272.1   | Detected   | 2555.7   | Detected   | Ccnl1         | 1.12849384  | 1.00326754 | 1.01207825 | 0.8997703 |
| A_51_P1775 | 13006.3  | Detected | 15664.4  | Detected   | 14475.8  | Detected   | 14676.7  | Detected   | Emc6          | 1.128430069 | 1.11298371 | 0.9369462  | 0.9241209 |
| A_55_P2060 | 4235.3   | Detected | 2998.2   | Detected   | 3896.6   | Detected   | 4778.4   | Detected   | Spidr         | 1.128231766 | 0.92002928 | 1.59375625 | 1.2996465 |
| A_55_P2096 | 160.7    | Detected | 128.8    | Detected   | 133.5    | Detected   | 181.3    | Detected   | Cdc42bpa      | 1.128189172 | 0.83074051 | 1.4076087  | 1.0364907 |
| A_55_P2048 | 887.2    | Detected | 415.1    | Detected   | 1178.6   | Detected   | 1000.9   | Detected   | Cd82          | 1.128155996 | 1.32844905 | 2.41122621 | 2.8393158 |
| A_55_P2027 | 1087.2   | Detected | 928      | Detected   | 852.8    | Detected   | 1226.5   | Detected   | Fbf1          | 1.128127299 | 0.78440029 | 1.32165948 | 0.9189655 |
| A_52_P1361 | 28.1     | Detected | 26.6     | Detected   | 35.6     | Detected   | 31.7     | Not Detect | Fdft1         | 1.128113879 | 1.26690391 | 1.19172932 | 1.3383459 |
| A_55_P2214 | 154.7    | Detected | 154.8    | Detected   | 118.3    | Detected   | 174.5    | Detected   | Phtf1os       | 1.127989657 | 0.76470588 | 1.12726098 | 0.7642119 |
| A_52_P4912 | 54.7     | Detected | 43.9     | Detected   | 50.4     | Detected   | 61.7     | Detected   | Tet3          | 1.12797075  | 0.9213894  | 1.40546697 | 1.1480638 |
| A_55_P2081 | 151280.8 | Detected | 175963.6 | Detected   | 179310.8 | Detected   | 170625.1 | Detected   | Atp5g2        | 1.127870159 | 1.18528458 | 0.96966134 | 1.0190221 |
| A_55_P2112 | 10998.3  | Detected | 10001.4  | Detected   | 8125.4   | Detected   | 12404.5  | Detected   | Arhgap17      | 1.127856123 | 0.7387869  | 1.24027636 | 0.8124263 |
| A_55_P1962 | 300920   | Detected | 306720.8 | Detected   | 304731.8 | Detected   | 339392   | Detected   | LOC100505283  | 1.127847933 | 1.01266715 | 1.10651772 | 0.9935153 |
| A_55_P2157 | 110735   | Detected | 99064.6  | Detected   | 104180.8 | Detected   | 124886.5 | Detected   | Wdr34         | 1.12779609  | 0.94081185 | 1.26065719 | 1.0516451 |
| A_55_P1953 | 28.2     | Detected | 21.9     | Detected   | 22.4     | Detected   | 31.8     | Not Detect | Rbfox1        | 1.127659574 | 0.79432624 | 1.45205479 | 1.0228311 |
| A_55_P2063 | 221.7    | Detected | 206      | Detected   | 182      | Detected   | 250      | Detected   | Rgp1          | 1.127649977 | 0.82092918 | 1.21359223 | 0.8834951 |
| A_52_P4623 | 2100.4   | Detected | 2347.8   | Detected   | 2436.2   | Detected   | 2368.4   | Detected   | Dr1           | 1.127594744 | 1.15987431 | 1.00877417 | 1.0376523 |
| A_52_P2154 | 188.1    | Detected | 172.4    | Detected   | 185.2    | Detected   | 212.1    | Detected   | Plekha1       | 1.127591707 | 0.98458267 | 1.23027842 | 1.0742459 |
| A_51_P1583 | 3127.5   | Detected | 2454.6   | Detected   | 3217.9   | Detected   | 3526.5   | Detected   | Cdk19         | 1.127577938 | 1.02890488 | 1.4366903  | 1.3109672 |
| A_55_P1987 | 977.1    | Detected | 695.7    | Detected   | 1045.9   | Detected   | 1101.7   | Detected   | Tbl1xr1       | 1.127520213 | 1.07041244 | 1.58358488 | 1.5033779 |
| A_52_P4086 | 572.5    | Detected | 541.8    | Detected   | 509.2    | Detected   | 645.5    | Detected   | Mycbp         | 1.127510917 | 0.88943231 | 1.19139904 | 0.9398302 |
| A_55_P2257 | 182.8    | Detected | 160.1    | Detected   | 154.5    | Detected   | 206.1    | Detected   | E330011O21Rik | 1.127461707 | 0.845186   | 1.28732042 | 0.9650219 |
| A_55_P2144 | 161665.1 | Detected | 172710.1 | Detected   | 175666   | Detected   | 182263.7 | Detected   | LOC101056141  | 1.127415255 | 1.08660434 | 1.05531582 | 1.0171148 |
| A_55_P2035 | 10356.8  | Detected | 12121.4  | Detected   | 10713.3  | Detected   | 11676.4  | Detected   | Rhot1         | 1.127413873 | 1.03442183 | 0.96328807 | 0.8838336 |
| A_55_P2125 | 16.5     | Detected | 23.5     | Detected   | 21.7     | Detected   | 18.6     | Not Detect | Lrrc4b        | 1.127272727 | 1.31515152 | 0.79148936 | 0.9234043 |
| A_55_P2085 | 81       | Detected | 89.2     | Detected   | 78.9     | Detected   | 91.3     | Detected   | Gm6287        | 1.127160494 | 0.97407407 | 1.0235426  | 0.8845291 |
| A_55_P2161 | 6784.6   | Detected | 6735     | Detected   | 7899.2   | Detected   | 7647     | Detected   | Tomm40        | 1.127111399 | 1.16428382 | 1.13541203 | 1.1728582 |
| A_55_P2010 | 4188.9   | Detected | 4430     | Detected   | 4758.3   | Detected   | 4721.2   | Detected   | Mrps23        | 1.127073933 | 1.13593067 | 1.06573363 | 1.0741084 |
| A_55_P2113 | 18.1     | Detected | 10.9     | Not Detect | 12.4     | Not Detect | 20.4     | Not Detect | Nupr1l        | 1.127071823 | 0.68508287 | 1.87155963 | 1.1376147 |
| A_51_P5130 | 13265.2  | Detected | 15096.4  | Detected   | 13488.9  | Detected   | 14950.8  | Detected   | Gins4         | 1.127069324 | 1.01686367 | 0.99035532 | 0.8935177 |
| A_66_P1255 | 3678.5   | Detected | 3781.6   | Detected   | 3594.8   | Detected   | 4145.9   | Detected   | H2afy2        | 1.127062661 | 0.97724616 | 1.09633488 | 0.9506029 |
| A_55_P2146 | 232160.1 | Detected | 233077.8 | Detected   | 223285.5 | Detected   | 261657.9 | Detected   | Gla           | 1.127058009 | 0.96177379 | 1.12262043 | 0.957987  |
| A_55_P1986 | 2682.8   | Detected | 2080.8   | Detected   | 2755.2   | Detected   | 3023.6   | Detected   | Fam134a       | 1.12703146  | 1.02698673 | 1.45309496 | 1.3241061 |
| A_52_P2879 | 3123.9   | Detected | 3886.4   | Detected   | 3993.4   | Detected   | 3520.7   | Detected   | Isg2012       | 1.127020711 | 1.27833797 | 0.90590263 | 1.0275319 |
| A_55_P2022 | 1232.1   | Detected | 1357.2   | Detected   | 1311     | Detected   | 1388.6   | Detected   | Tmem209       | 1.127018911 | 1.06403701 | 1.02313587 | 0.9659593 |
| A_51_P4793 | 63.8     | Detected | 87.3     | Detected   | 84.6     | Detected   | 71.9     | Detected   | Klhdc9        | 1.126959248 | 1.32601881 | 0.82359679 | 0.9690722 |

|            |          |          |          |          |          |            |          |            |               |             |            |            |           |
|------------|----------|----------|----------|----------|----------|------------|----------|------------|---------------|-------------|------------|------------|-----------|
| A_55_P2184 | 85.9     | Detected | 83.4     | Detected | 71.7     | Detected   | 96.8     | Detected   | Btbd10        | 1.126891735 | 0.8346915  | 1.16067146 | 0.8597122 |
| A_55_P2027 | 1027.4   | Detected | 1146.3   | Detected | 931.1    | Detected   | 1157.7   | Detected   | Cryba4        | 1.126824995 | 0.90626825 | 1.00994504 | 0.8122656 |
| A_66_P1297 | 11066    | Detected | 14548.3  | Detected | 13405.4  | Detected   | 12468.8  | Detected   | Ccdc59        | 1.126766673 | 1.2114043  | 0.85706234 | 0.921441  |
| A_55_P1961 | 21414.1  | Detected | 20171.1  | Detected | 18834.2  | Detected   | 24128.5  | Detected   | Tes           | 1.126757604 | 0.8795233  | 1.19619158 | 0.933722  |
| A_66_P1095 | 6802.1   | Detected | 6863.4   | Detected | 4430.8   | Detected   | 7664.1   | Detected   | Ube4b         | 1.12672557  | 0.65138707 | 1.1166623  | 0.6455693 |
| A_55_P2078 | 1949.9   | Detected | 2120.3   | Detected | 1806     | Detected   | 2196.9   | Detected   | Pqlc1         | 1.126673163 | 0.92620134 | 1.03612696 | 0.8517663 |
| A_55_P1957 | 51454.9  | Detected | 52455    | Detected | 47361.3  | Detected   | 57971.6  | Detected   | Tnfaip1       | 1.126648774 | 0.92044295 | 1.10516824 | 0.9028939 |
| A_55_P2041 | 302591.9 | Detected | 299233.5 | Detected | 278357.3 | Detected   | 340909.3 | Detected   | Rn4.5s        | 1.12663062  | 0.91990995 | 1.13927518 | 0.9302344 |
| A_51_P4821 | 2196.9   | Detected | 1828.6   | Detected | 1215.9   | Detected   | 2474.9   | Detected   | Edn2          | 1.126541945 | 0.5534617  | 1.35343979 | 0.6649349 |
| A_55_P1993 | 4246.3   | Detected | 3203     | Detected | 4348     | Detected   | 4783.5   | Detected   | Taz           | 1.126510138 | 1.02395026 | 1.49344365 | 1.3574774 |
| A_55_P2260 | 2039.4   | Detected | 1779.5   | Detected | 1591.8   | Detected   | 2297.3   | Detected   | Gm17753       | 1.126458762 | 0.78052368 | 1.29098061 | 0.8945209 |
| A_55_P1953 | 241907.2 | Detected | 258324.1 | Detected | 246926.6 | Detected   | 272496.8 | Detected   | LOC100505283  | 1.126451796 | 1.02074928 | 1.05486403 | 0.9558791 |
| A_52_P5944 | 726.8    | Detected | 533.4    | Detected | 653.4    | Detected   | 818.7    | Detected   | Anks3         | 1.126444689 | 0.89900936 | 1.53487064 | 1.2249719 |
| A_52_P1988 | 6491.2   | Detected | 5046.7   | Detected | 7421.6   | Detected   | 7311.7   | Detected   | Samd5         | 1.126401898 | 1.14333251 | 1.44880813 | 1.4705847 |
| A_51_P4070 | 18766.4  | Detected | 22398.4  | Detected | 15757.4  | Detected   | 21138.5  | Detected   | Prkrip1       | 1.126401441 | 0.83966024 | 0.94375045 | 0.7035056 |
| A_55_P2164 | 19       | Detected | 39.2     | Detected | 15.6     | Not Detect | 21.4     | Not Detect | Kcnj15        | 1.126315789 | 0.82105263 | 0.54591837 | 0.3979592 |
| A_55_P1968 | 1073.5   | Detected | 997.8    | Detected | 966.2    | Detected   | 1209     | Detected   | Tle1          | 1.126222636 | 0.90004658 | 1.21166566 | 0.9683303 |
| A_66_P1000 | 17414.1  | Detected | 17958.9  | Detected | 20602.7  | Detected   | 19612    | Detected   | Ncaph2        | 1.126213815 | 1.1831045  | 1.09204907 | 1.1472139 |
| A_52_P4561 | 902.8    | Detected | 900.6    | Detected | 951      | Detected   | 1016.7   | Detected   | Fchsd1        | 1.126163048 | 1.05338946 | 1.12891406 | 1.0559627 |
| A_55_P1972 | 634.9    | Detected | 558.5    | Detected | 464.8    | Detected   | 715      | Detected   | Napb          | 1.1261616   | 0.73208379 | 1.28021486 | 0.8322292 |
| A_51_P4257 | 1643.2   | Detected | 1956.8   | Detected | 1588.8   | Detected   | 1850.5   | Detected   | Mtus2         | 1.12615628  | 0.96689387 | 0.94567661 | 0.8119379 |
| A_55_P1998 | 38881.9  | Detected | 70391.3  | Detected | 36884.9  | Detected   | 43787    | Detected   | Trmt1         | 1.126153814 | 0.94863934 | 0.6220513  | 0.523998  |
| A_55_P2373 | 585.8    | Detected | 395.5    | Detected | 595.6    | Detected   | 659.7    | Detected   | 2310058N22Rik | 1.12615227  | 1.01672926 | 1.66801517 | 1.5059418 |
| A_51_P1719 | 5557.9   | Detected | 5198.8   | Detected | 4873.6   | Detected   | 6259     | Detected   | 1110058L19Rik | 1.126144767 | 0.87687796 | 1.20393168 | 0.9374471 |
| A_55_P2151 | 38666.5  | Detected | 38293    | Detected | 46318.2  | Detected   | 43543.7  | Detected   | Tufm          | 1.126135026 | 1.19788965 | 1.13711906 | 1.2095736 |
| A_55_P2369 | 76.2     | Detected | 66.4     | Detected | 78.5     | Detected   | 85.8     | Detected   | Gm5919        | 1.125984252 | 1.03018373 | 1.29216867 | 1.1822289 |
| A_51_P1568 | 17040.6  | Detected | 16253.7  | Detected | 20354    | Detected   | 19187.3  | Detected   | Smim3         | 1.125975611 | 1.19444151 | 1.18048814 | 1.2522687 |
| A_51_P4954 | 6299     | Detected | 5671.6   | Detected | 6146.3   | Detected   | 7092.4   | Detected   | Tmem55a       | 1.125956501 | 0.97575806 | 1.25051132 | 1.0836977 |
| A_55_P1974 | 326842.8 | Detected | 360797.7 | Detected | 332435.3 | Detected   | 367927.8 | Detected   | Sprr2a2       | 1.125702631 | 1.01711067 | 1.01976204 | 0.9213897 |
| A_55_P2148 | 261.8    | Detected | 255      | Detected | 313.3    | Detected   | 294.7    | Detected   | Krt2          | 1.125668449 | 1.19671505 | 1.15568627 | 1.2286275 |
| A_55_P2028 | 1343.9   | Detected | 1478.5   | Detected | 1611.6   | Detected   | 1512.7   | Detected   | Dusp12        | 1.125604584 | 1.19919637 | 1.02313155 | 1.0900237 |
| A_55_P2008 | 42590.1  | Detected | 39866.6  | Detected | 41746.6  | Detected   | 47938.7  | Detected   | Cltc          | 1.125583175 | 0.98019493 | 1.20247776 | 1.0471573 |
| A_52_P4034 | 16444    | Detected | 12947.3  | Detected | 14801.5  | Detected   | 18508.4  | Detected   | Tns3          | 1.125541231 | 0.90011554 | 1.42951812 | 1.1432113 |
| A_55_P2128 | 87.7     | Detected | 67       | Detected | 84.3     | Detected   | 98.7     | Detected   | D830031N03Rik | 1.125427594 | 0.96123147 | 1.47313433 | 1.258209  |
| A_51_P2692 | 239.6    | Detected | 996.6    | Detected | 236.9    | Detected   | 269.6    | Detected   | Trpv4         | 1.125208681 | 0.98873122 | 0.27051977 | 0.2377082 |
| A_52_P4453 | 41259.5  | Detected | 37212.2  | Detected | 50702.4  | Detected   | 46425.1  | Detected   | Cwc15         | 1.125197833 | 1.22886608 | 1.24757741 | 1.3625209 |
| A_55_P2083 | 88.7     | Detected | 64.8     | Detected | 77.1     | Detected   | 99.8     | Detected   | Rab8b         | 1.125140924 | 0.8692221  | 1.54012346 | 1.1898148 |
| A_55_P2052 | 410      | Detected | 443.4    | Detected | 568.4    | Detected   | 461.3    | Detected   | Dyrk2         | 1.125121951 | 1.38634146 | 1.04036987 | 1.2819125 |
| A_51_P4808 | 20.8     | Detected | 28.4     | Detected | 10.4     | Not Detect | 23.4     | Not Detect | Pga5          | 1.125       | 0.5        | 0.82394366 | 0.3661972 |
| A_55_P2207 | 33.6     | Detected | 22.3     | Detected | 21.2     | Detected   | 37.8     | Not Detect | Gm10065       | 1.125       | 0.63095238 | 1.69506726 | 0.9506726 |

|            |          |          |          |          |          |          |          |            |               |             |            |            |           |
|------------|----------|----------|----------|----------|----------|----------|----------|------------|---------------|-------------|------------|------------|-----------|
| A_55_P2151 | 14628.3  | Detected | 14117    | Detected | 13302.1  | Detected | 16455    | Detected   | Casc3         | 1.124874387 | 0.90934011 | 1.16561592 | 0.9422753 |
| A_51_P4013 | 60.9     | Detected | 61.8     | Detected | 56.6     | Detected | 68.5     | Detected   | Cldn14        | 1.124794745 | 0.92939245 | 1.10841424 | 0.9158576 |
| A_52_P4560 | 376.7    | Detected | 335.7    | Detected | 373.9    | Detected | 423.7    | Detected   | 2510003E04Rik | 1.12476772  | 0.99256703 | 1.26213881 | 1.1137921 |
| A_55_P2159 | 998.7    | Detected | 1218.6   | Detected | 1167     | Detected | 1123.3   | Detected   | Yaf2          | 1.124762191 | 1.16851907 | 0.9217955  | 0.9576563 |
| A_55_P2003 | 51.3     | Detected | 59.8     | Detected | 85.4     | Detected | 57.7     | Detected   | 4930480K23Rik | 1.124756335 | 1.66471735 | 0.96488294 | 1.4280936 |
| A_55_P2230 | 179.6    | Detected | 198.3    | Detected | 154.4    | Detected | 202      | Detected   | A730046J19Rik | 1.124721604 | 0.8596882  | 1.0186586  | 0.7786183 |
| A_66_P1332 | 15714.2  | Detected | 17588.2  | Detected | 14013.7  | Detected | 17673.6  | Detected   | Nfyc          | 1.124689771 | 0.89178577 | 1.00485553 | 0.7967672 |
| A_55_P2017 | 70.6     | Detected | 59.2     | Detected | 57.2     | Detected | 79.4     | Detected   | Aldh16a1      | 1.124645892 | 0.8101983  | 1.34121622 | 0.9662162 |
| A_55_P2056 | 261375.7 | Detected | 300847.2 | Detected | 284281.5 | Detected | 293954.2 | Detected   | Rps3a1        | 1.124642421 | 1.08763554 | 0.97708804 | 0.9449365 |
| A_55_P2101 | 585.1    | Detected | 590.7    | Detected | 566.5    | Detected | 658      | Detected   | Det1          | 1.124594086 | 0.96821056 | 1.11393262 | 0.9590317 |
| A_51_P3544 | 916.3    | Detected | 981.6    | Detected | 1043.9   | Detected | 1030.4   | Detected   | Ppie          | 1.124522536 | 1.1392557  | 1.04971475 | 1.0634678 |
| A_55_P2014 | 1412.9   | Detected | 871.3    | Detected | 1511.7   | Detected | 1588.8   | Detected   | Gm20056       | 1.124495718 | 1.0699271  | 1.82348215 | 1.7349937 |
| A_66_P1022 | 9958.2   | Detected | 11948.1  | Detected | 10854.5  | Detected | 11197.6  | Detected   | Nemf          | 1.124460244 | 1.09000623 | 0.93718667 | 0.9084708 |
| A_55_P1978 | 175.3    | Detected | 188      | Detected | 149.3    | Detected | 197.1    | Detected   | Trit1         | 1.124358243 | 0.85168283 | 1.04840426 | 0.7941489 |
| A_51_P3947 | 46987.9  | Detected | 36162.8  | Detected | 50812.5  | Detected | 52826.7  | Detected   | Actn4         | 1.124261778 | 1.08139542 | 1.46080226 | 1.4051041 |
| A_52_P2701 | 1103.6   | Detected | 792.3    | Detected | 908.6    | Detected | 1240.7   | Detected   | Zfp329        | 1.124229793 | 0.82330555 | 1.56594724 | 1.1467878 |
| A_52_P2537 | 3871.2   | Detected | 3324     | Detected | 3943.4   | Detected | 4352     | Detected   | Zbtb45        | 1.124199215 | 1.01865055 | 1.30926594 | 1.1863418 |
| A_55_P2025 | 719.9    | Detected | 595.7    | Detected | 612.6    | Detected | 809.3    | Detected   | Csf1r         | 1.124183914 | 0.85095152 | 1.35856975 | 1.02837   |
| A_55_P1988 | 33259    | Detected | 27633.8  | Detected | 30976.7  | Detected | 37388.8  | Detected   | Prc1          | 1.124170901 | 0.93137797 | 1.35300972 | 1.1209714 |
| A_52_P2474 | 41.9     | Detected | 43.9     | Detected | 37.9     | Detected | 47.1     | Detected   | 0610040B10Rik | 1.124105012 | 0.90453461 | 1.07289294 | 0.8633257 |
| A_55_P2270 | 79.8     | Detected | 67.4     | Detected | 124.1    | Detected | 89.7     | Detected   | 4930528J11Rik | 1.12406015  | 1.55513784 | 1.33086053 | 1.8412463 |
| A_51_P3095 | 38.7     | Detected | 38.4     | Detected | 48.7     | Detected | 43.5     | Not Detect | Nepn          | 1.124031008 | 1.25839793 | 1.1328125  | 1.2682292 |
| A_55_P2120 | 1604.8   | Detected | 1852.5   | Detected | 1312.2   | Detected | 1803.6   | Detected   | Snx16         | 1.123878365 | 0.81767198 | 0.97360324 | 0.7083401 |
| A_66_P1009 | 54.1     | Detected | 50       | Detected | 48.2     | Detected | 60.8     | Detected   | Eqtn          | 1.123844732 | 0.8909427  | 1.216      | 0.964     |
| A_51_P2450 | 73.5     | Detected | 162      | Detected | 29.5     | Detected | 82.6     | Detected   | Aqp3          | 1.123809524 | 0.40136054 | 0.50987654 | 0.1820988 |
| A_51_P4963 | 1739.2   | Detected | 1594.2   | Detected | 1842.1   | Detected | 1954.5   | Detected   | Ptk7          | 1.123792548 | 1.05916513 | 1.22600677 | 1.1555012 |
| A_55_P2032 | 6229.8   | Detected | 2847.4   | Detected | 5377.7   | Detected | 7000.6   | Detected   | 1190002N15Rik | 1.123727889 | 0.86322193 | 2.4585938  | 1.8886352 |
| A_51_P1965 | 12842.7  | Detected | 14035.6  | Detected | 17229.3  | Detected | 14431.1  | Detected   | Hadh          | 1.123681157 | 1.34156369 | 1.02817835 | 1.2275428 |
| A_55_P2039 | 296.8    | Detected | 197.6    | Detected | 71.1     | Detected | 333.5    | Detected   | 5-Sep         | 1.123652291 | 0.23955526 | 1.68775304 | 0.3598178 |
| A_55_P2025 | 2669.6   | Detected | 3491.1   | Detected | 3019.5   | Detected | 2999.6   | Detected   | Llph          | 1.123614025 | 1.13106832 | 0.85921343 | 0.8649136 |
| A_55_P2179 | 9674     | Detected | 7534     | Detected | 9629.6   | Detected | 10869.7  | Detected   | Alg1          | 1.123599338 | 0.99541038 | 1.44275285 | 1.2781524 |
| A_55_P2136 | 42812.5  | Detected | 49480.8  | Detected | 43000.8  | Detected | 48102.9  | Detected   | Zkscan1       | 1.123571387 | 1.00439825 | 0.97215284 | 0.8690401 |
| A_55_P2110 | 4125.4   | Detected | 4204.8   | Detected | 6048.9   | Detected | 4635.1   | Detected   | Zfp637        | 1.123551656 | 1.46625782 | 1.10233543 | 1.4385702 |
| A_55_P2112 | 4674.8   | Detected | 3467.8   | Detected | 4068.2   | Detected | 5252     | Detected   | Tnk2          | 1.123470523 | 0.87024044 | 1.51450487 | 1.1731357 |
| A_51_P2908 | 3995.4   | Detected | 3730.5   | Detected | 4306.7   | Detected | 4488.7   | Detected   | Hint3         | 1.123466987 | 1.0779146  | 1.20324353 | 1.1544565 |
| A_51_P2767 | 434.3    | Detected | 311.2    | Detected | 375.1    | Detected | 487.9    | Detected   | Olf1r1350     | 1.123416993 | 0.86368869 | 1.56780206 | 1.2053342 |
| A_55_P1964 | 105551   | Detected | 107748.6 | Detected | 118229.2 | Detected | 118577.6 | Detected   | Mlf2          | 1.123415221 | 1.12011445 | 1.10050247 | 1.097269  |
| A_55_P2112 | 240.7    | Detected | 215.4    | Detected | 180.7    | Detected | 270.4    | Detected   | Olf1r1008     | 1.123390112 | 0.75072705 | 1.2553389  | 0.8389044 |
| A_55_P1983 | 7548.4   | Detected | 10170.9  | Detected | 3812.9   | Detected | 8479.7   | Detected   | Pmepa1        | 1.12337714  | 0.50512691 | 0.8337217  | 0.3748832 |
| A_55_P1975 | 107.8    | Detected | 64.6     | Detected | 154.8    | Detected | 121.1    | Detected   | Oraov1        | 1.123376623 | 1.43599258 | 1.874613   | 2.3962848 |

|            |          |          |          |            |          |            |          |            |               |             |            |            |           |
|------------|----------|----------|----------|------------|----------|------------|----------|------------|---------------|-------------|------------|------------|-----------|
| A_52_P3980 | 73.8     | Detected | 68.3     | Detected   | 66.5     | Detected   | 82.9     | Detected   | Map3k15       | 1.123306233 | 0.90108401 | 1.21376281 | 0.9736457 |
| A_66_P1323 | 27704.2  | Detected | 27909.7  | Detected   | 38779.2  | Detected   | 31119.5  | Detected   | Mrpl21        | 1.123277337 | 1.39975888 | 1.11500661 | 1.3894524 |
| A_55_P2004 | 17290.1  | Detected | 17435.4  | Detected   | 23090.5  | Detected   | 19420.9  | Detected   | Nabp2         | 1.123238154 | 1.33547521 | 1.11387751 | 1.3243459 |
| A_55_P2238 | 47.9     | Detected | 31.9     | Detected   | 42       | Detected   | 53.8     | Detected   | Wdr7          | 1.123173278 | 0.87682672 | 1.68652038 | 1.3166144 |
| A_55_P2127 | 34.1     | Detected | 30.6     | Detected   | 37.9     | Detected   | 38.3     | Not Detect | Phc3          | 1.123167155 | 1.11143695 | 1.25163399 | 1.2385621 |
| A_55_P2039 | 38188.1  | Detected | 42003.3  | Detected   | 40162.1  | Detected   | 42891.6  | Detected   | Gfra4         | 1.123166641 | 1.0516915  | 1.02114834 | 0.9561653 |
| A_55_P2084 | 86.9     | Detected | 61.5     | Detected   | 86.5     | Detected   | 97.6     | Detected   | Slc8b1        | 1.123130035 | 0.99539701 | 1.58699187 | 1.4065041 |
| A_51_P3755 | 463.8    | Detected | 577.8    | Detected   | 551.7    | Detected   | 520.9    | Detected   | Spty2d1       | 1.123113411 | 1.18952135 | 0.90152302 | 0.9548287 |
| A_55_P2159 | 6992.9   | Detected | 7345.1   | Detected   | 7112.7   | Detected   | 7853.6   | Detected   | Atf1          | 1.123081983 | 1.01713166 | 1.06922983 | 0.9683599 |
| A_55_P2098 | 970.4    | Detected | 878      | Detected   | 977.2    | Detected   | 1089.8   | Detected   | Coq5          | 1.123042045 | 1.00700742 | 1.24123007 | 1.1129841 |
| A_66_P1018 | 206      | Detected | 250.8    | Detected   | 185      | Detected   | 231.3    | Detected   | Cyp2u1        | 1.122815534 | 0.89805825 | 0.9222488  | 0.7376396 |
| A_51_P4149 | 421.8    | Detected | 394.3    | Detected   | 415.9    | Detected   | 473.6    | Detected   | Pigw          | 1.122807018 | 0.98601233 | 1.2011159  | 1.0547806 |
| A_55_P2001 | 5735.3   | Detected | 5976.9   | Detected   | 7174.3   | Detected   | 6439.4   | Detected   | Cab39l        | 1.122766028 | 1.25090231 | 1.07738125 | 1.200338  |
| A_52_P7384 | 1260.3   | Detected | 1177.4   | Detected   | 1551.8   | Detected   | 1415     | Detected   | Clint1        | 1.122748552 | 1.23129414 | 1.20180058 | 1.3179888 |
| A_52_P2366 | 16.3     | Detected | 11.1     | Not Detect | 9.7      | Not Detect | 18.3     | Not Detect | Cldn19        | 1.122699387 | 0.59509202 | 1.64864865 | 0.8738739 |
| A_55_P2230 | 552.3    | Detected | 576.2    | Detected   | 500.2    | Detected   | 620      | Detected   | Pigm          | 1.122578309 | 0.90566721 | 1.07601527 | 0.8681014 |
| A_51_P1423 | 782.6    | Detected | 1088     | Detected   | 707.4    | Detected   | 878.5    | Detected   | Fancm         | 1.12254025  | 0.90391004 | 0.80744485 | 0.6501838 |
| A_51_P4831 | 24746.4  | Detected | 24324.7  | Detected   | 24704.4  | Detected   | 27777.5  | Detected   | Gchfr         | 1.122486503 | 0.99830278 | 1.14194625 | 1.0156096 |
| A_52_P1377 | 154599.1 | Detected | 156053.8 | Detected   | 136918.5 | Detected   | 173529.5 | Detected   | Lmna          | 1.12244832  | 0.88563582 | 1.1119851  | 0.8773801 |
| A_55_P2114 | 28.6     | Detected | 37.9     | Detected   | 20.7     | Detected   | 32.1     | Not Detect | Usp18         | 1.122377622 | 0.72377622 | 0.8469657  | 0.5461741 |
| A_55_P2038 | 242031   | Detected | 260486.1 | Detected   | 302322   | Detected   | 271643.2 | Detected   | Rpsa          | 1.12234879  | 1.24910445 | 1.04283184 | 1.160607  |
| A_51_P5211 | 51.5     | Detected | 37.5     | Detected   | 28.4     | Detected   | 57.8     | Detected   | Fbxw27        | 1.122330097 | 0.55145631 | 1.54133333 | 0.7573333 |
| A_65_P0344 | 270066.2 | Detected | 255093.2 | Detected   | 278416.2 | Detected   | 303100.8 | Detected   | Pgk1          | 1.122320379 | 1.03091835 | 1.18819631 | 1.0914293 |
| A_51_P1306 | 17273.7  | Detected | 18946.5  | Detected   | 16746.5  | Detected   | 19386.6  | Detected   | Mrps30        | 1.122318901 | 0.96947961 | 1.02322856 | 0.8838836 |
| A_51_P3581 | 27.8     | Detected | 23       | Detected   | 29.9     | Detected   | 31.2     | Not Detect | Olfrc332      | 1.122302158 | 1.07553957 | 1.35652174 | 1.3       |
| A_51_P4287 | 43862.8  | Detected | 54132.2  | Detected   | 56451    | Detected   | 49227.3  | Detected   | Mrpl13        | 1.122301814 | 1.28699034 | 0.90939034 | 1.0428359 |
| A_55_P2006 | 485.1    | Detected | 466.3    | Detected   | 362      | Detected   | 544.4    | Detected   | 3300002108Rik | 1.122242837 | 0.74623789 | 1.16748874 | 0.7763243 |
| A_55_P2051 | 36       | Detected | 25.1     | Detected   | 9.7      | Not Detect | 40.4     | Not Detect | Zfp704        | 1.122222222 | 0.26944444 | 1.60956175 | 0.3864542 |
| A_51_P1212 | 818.7    | Detected | 756.4    | Detected   | 969.7    | Detected   | 918.7    | Detected   | Ints4         | 1.122144864 | 1.18443874 | 1.21456901 | 1.2819937 |
| A_55_P2044 | 79483.6  | Detected | 81156.1  | Detected   | 76261.6  | Detected   | 89191    | Detected   | Ybx1          | 1.122130855 | 0.95946334 | 1.0990055  | 0.9396903 |
| A_55_P2110 | 185.9    | Detected | 170      | Detected   | 109.8    | Detected   | 208.6    | Detected   | Zscan20       | 1.122108661 | 0.59064013 | 1.22705882 | 0.6458824 |
| A_55_P2159 | 93.4     | Detected | 83       | Detected   | 75.2     | Detected   | 104.8    | Detected   | Plekha4       | 1.122055675 | 0.80513919 | 1.2626506  | 0.9060241 |
| A_55_P2141 | 16790.8  | Detected | 17810.7  | Detected   | 22026.6  | Detected   | 18839.9  | Detected   | Aen           | 1.122037068 | 1.31182552 | 1.05778549 | 1.236706  |
| A_55_P2147 | 7291.5   | Detected | 6243.9   | Detected   | 5971.2   | Detected   | 8181     | Detected   | Zglp1         | 1.12199136  | 0.81892615 | 1.31023879 | 0.9563254 |
| A_55_P2085 | 4224.3   | Detected | 4298.9   | Detected   | 4950.2   | Detected   | 4738.7   | Detected   | Smarcal1      | 1.121771654 | 1.17183912 | 1.10230524 | 1.1515039 |
| A_51_P4299 | 28095.3  | Detected | 24537.2  | Detected   | 25964.4  | Detected   | 31516.5  | Detected   | Supt5         | 1.121771257 | 0.92415457 | 1.28443751 | 1.0581647 |
| A_51_P2080 | 557.3    | Detected | 500.3    | Detected   | 605.2    | Detected   | 625.1    | Detected   | Cnot6l        | 1.121657994 | 1.08595012 | 1.24945033 | 1.2096742 |
| A_55_P2186 | 706.1    | Detected | 858.1    | Detected   | 801.7    | Detected   | 792      | Detected   | Shmt1         | 1.121654157 | 1.13539159 | 0.92296935 | 0.9342734 |
| A_52_P5869 | 14.8     | Detected | 8.4      | Not Detect | 3.3      | Not Detect | 16.6     | Not Detect | Pdyn          | 1.121621622 | 0.22297297 | 1.97619048 | 0.3928571 |
| A_55_P2116 | 1901.8   | Detected | 1769.3   | Detected   | 1937.1   | Detected   | 2133     | Detected   | 1700024P12Rik | 1.12156904  | 1.01856136 | 1.20556152 | 1.0948398 |



|            |         |          |         |            |         |            |         |            |               |             |            |            |           |
|------------|---------|----------|---------|------------|---------|------------|---------|------------|---------------|-------------|------------|------------|-----------|
| A_55_P2067 | 4501.7  | Detected | 4494.9  | Detected   | 4575.6  | Detected   | 5048.9  | Detected   | Tmpo          | 1.12155408  | 1.01641602 | 1.1232508  | 1.0179537 |
| A_55_P2224 | 264.1   | Detected | 258.2   | Detected   | 303.6   | Detected   | 296.2   | Detected   | Fam219b       | 1.121544869 | 1.14956456 | 1.14717273 | 1.1758327 |
| A_51_P4636 | 660.2   | Detected | 772.7   | Detected   | 597.9   | Detected   | 740.4   | Detected   | Xpnppe3       | 1.12147834  | 0.90563466 | 0.95819852 | 0.7737803 |
| A_51_P4530 | 16992.4 | Detected | 12539.3 | Detected   | 15104.5 | Detected   | 19056.2 | Detected   | Aacs          | 1.121454297 | 0.88889739 | 1.51971801 | 1.2045728 |
| A_55_P2046 | 159.8   | Detected | 155.3   | Detected   | 128.5   | Detected   | 179.2   | Detected   | Tnfrsf14      | 1.121401752 | 0.80413016 | 1.15389569 | 0.8274308 |
| A_51_P4483 | 977     | Detected | 1233.2  | Detected   | 798.6   | Detected   | 1095.6  | Detected   | Nkiras1       | 1.121392016 | 0.8174002  | 0.88842037 | 0.6475835 |
| A_51_P5009 | 103     | Detected | 53.5    | Detected   | 99.1    | Detected   | 115.5   | Detected   | Aff1          | 1.121359223 | 0.96213592 | 2.1588785  | 1.8523364 |
| A_55_P1983 | 261.3   | Detected | 143.4   | Detected   | 193.9   | Detected   | 293     | Detected   | Slc8b1        | 1.121316494 | 0.74205894 | 2.0432357  | 1.3521618 |
| A_55_P2185 | 1516.1  | Detected | 1651.5  | Detected   | 1559.1  | Detected   | 1700    | Detected   | Snrnp40       | 1.121298067 | 1.02836225 | 1.02936724 | 0.9440509 |
| A_55_P2002 | 2913.4  | Detected | 2981.1  | Detected   | 2654.5  | Detected   | 3266.6  | Detected   | Arfp1         | 1.121232924 | 0.91113476 | 1.09577002 | 0.8904431 |
| A_55_P2070 | 146.2   | Detected | 110     | Detected   | 500.7   | Detected   | 163.9   | Detected   | Lcn2          | 1.121067031 | 3.4247606  | 1.49       | 4.5518182 |
| A_52_P5594 | 3908.2  | Detected | 3800.4  | Detected   | 3691    | Detected   | 4381.3  | Detected   | Clk3          | 1.12105317  | 0.94442454 | 1.15285233 | 0.9712136 |
| A_51_P2494 | 9421.2  | Detected | 6123.1  | Detected   | 13693.8 | Detected   | 10561.2 | Detected   | Dgcr14        | 1.121003694 | 1.45350911 | 1.72481259 | 2.2364162 |
| A_55_P2326 | 311.6   | Detected | 271.3   | Detected   | 291.5   | Detected   | 349.3   | Detected   | 4930525G2ORik | 1.120988447 | 0.93549422 | 1.28750461 | 1.0744563 |
| A_51_P1954 | 1308.2  | Detected | 1203.5  | Detected   | 1342.5  | Detected   | 1466.4  | Detected   | Ube2q2        | 1.120929521 | 1.02621923 | 1.2184462  | 1.1154965 |
| A_55_P2040 | 4389.7  | Detected | 3898.3  | Detected   | 4302    | Detected   | 4920.3  | Detected   | Cdv3          | 1.120873864 | 0.98002141 | 1.26216556 | 1.103558  |
| A_51_P3072 | 1597.5  | Detected | 1666.7  | Detected   | 2354.9  | Detected   | 1790.4  | Detected   | Ankrd54       | 1.120751174 | 1.47411581 | 1.07421852 | 1.4129117 |
| A_55_P2161 | 3183.8  | Detected | 2274.1  | Detected   | 2355.5  | Detected   | 3568.2  | Detected   | Diap2         | 1.120736227 | 0.73983919 | 1.56906029 | 1.0357944 |
| A_55_P2190 | 34.8    | Detected | 33      | Detected   | 39.5    | Detected   | 39      | Not Detect | 2010110K18Rik | 1.120689655 | 1.13505747 | 1.18181818 | 1.1969697 |
| A_55_P2079 | 138.4   | Detected | 95.5    | Detected   | 169.8   | Detected   | 155.1   | Detected   | Parp6         | 1.12066474  | 1.22687861 | 1.62408377 | 1.7780105 |
| A_52_P4196 | 224.9   | Detected | 183.4   | Detected   | 194.5   | Detected   | 252     | Detected   | Srcap         | 1.120497999 | 0.86482881 | 1.3740458  | 1.0605234 |
| A_55_P1999 | 57539   | Detected | 53186.6 | Detected   | 50865.7 | Detected   | 64469.4 | Detected   | Ptch2         | 1.120447001 | 0.88402127 | 1.21213614 | 0.9563631 |
| A_55_P2032 | 3638.8  | Detected | 3779.1  | Detected   | 3190.7  | Detected   | 4076.6  | Detected   | Gm12666       | 1.120314389 | 0.87685501 | 1.07872245 | 0.8443016 |
| A_55_P2014 | 297.6   | Detected | 182.2   | Detected   | 319.4   | Detected   | 333.4   | Detected   | Gm7120        | 1.120295699 | 1.07325269 | 1.8298573  | 1.7530187 |
| A_55_P2060 | 1989    | Detected | 2368.4  | Detected   | 2626.1  | Detected   | 2228.2  | Detected   | Esco1         | 1.120261438 | 1.32031171 | 0.94080392 | 1.1088076 |
| A_51_P2563 | 3164.5  | Detected | 3687.8  | Detected   | 3268.5  | Detected   | 3544.9  | Detected   | Mrpl37        | 1.120208564 | 1.03286459 | 0.96125061 | 0.8863008 |
| A_55_P2097 | 841.9   | Detected | 1120.1  | Detected   | 908.6   | Detected   | 943.1   | Detected   | Zufsp         | 1.1202043   | 1.07922556 | 0.84197839 | 0.8111776 |
| A_55_P2154 | 20.8    | Detected | 6.9     | Not Detect | 3.4     | Not Detect | 23.3    | Not Detect | Ctxn2         | 1.120192308 | 0.16346154 | 3.37681159 | 0.4927536 |
| A_51_P1518 | 3109.6  | Detected | 4272.2  | Detected   | 3618.8  | Detected   | 3483    | Detected   | R3hcc1        | 1.120079753 | 1.16375096 | 0.81527082 | 0.8470577 |
| A_52_P4292 | 540.5   | Detected | 520.9   | Detected   | 604.6   | Detected   | 605.4   | Detected   | Ppp6r2        | 1.120074006 | 1.11859389 | 1.16221924 | 1.1606834 |
| A_51_P2444 | 16584.2 | Detected | 6573.5  | Detected   | 15083.1 | Detected   | 18574.9 | Detected   | Nbl1          | 1.120035938 | 0.90948614 | 2.8257245  | 2.2945311 |
| A_52_P1461 | 3426.5  | Detected | 4057.7  | Detected   | 3702.4  | Detected   | 3837.7  | Detected   | Ube2n         | 1.120005837 | 1.08051948 | 0.94578209 | 0.9124381 |
| A_52_P3246 | 12115.7 | Detected | 13234   | Detected   | 16934.3 | Detected   | 13569.3 | Detected   | Yif1a         | 1.119976559 | 1.39771536 | 1.02533626 | 1.2796056 |
| A_55_P2151 | 870.2   | Detected | 844     | Detected   | 959.6   | Detected   | 974.6   | Detected   | Atg7          | 1.11997242  | 1.102735   | 1.15473934 | 1.1369668 |
| A_55_P2174 | 1179.5  | Detected | 1102.2  | Detected   | 1596.7  | Detected   | 1320.9  | Detected   | Zfp266        | 1.119881306 | 1.3537092  | 1.19842134 | 1.4486482 |
| A_55_P2073 | 294.5   | Detected | 256     | Detected   | 251.1   | Detected   | 329.8   | Detected   | Mycbp         | 1.119864177 | 0.85263158 | 1.28828125 | 0.9808594 |
| A_52_P4377 | 777.5   | Detected | 787.8   | Detected   | 800.7   | Detected   | 870.6   | Detected   | Fbxo28        | 1.119742765 | 1.02983923 | 1.10510282 | 1.0163747 |
| A_51_P1403 | 221.4   | Detected | 238.2   | Detected   | 185.5   | Detected   | 247.9   | Detected   | Slc4a9        | 1.119692864 | 0.83785005 | 1.04072208 | 0.7787573 |
| A_55_P1987 | 67972.6 | Detected | 82909.3 | Detected   | 78927.2 | Detected   | 76100.4 | Detected   | 2700060E02Rik | 1.119574652 | 1.161162   | 0.91787532 | 0.9519704 |
| A_55_P2044 | 1061.9  | Detected | 1347.4  | Detected   | 1245.8  | Detected   | 1188.8  | Detected   | Tdg           | 1.119502778 | 1.17318015 | 0.88229182 | 0.9245955 |

|            |          |            |         |          |          |            |          |            |               |             |            |            |           |
|------------|----------|------------|---------|----------|----------|------------|----------|------------|---------------|-------------|------------|------------|-----------|
| A_55_P2058 | 9327.7   | Detected   | 9653.8  | Detected | 8835.9   | Detected   | 10442.3  | Detected   | Tmem50a       | 1.119493551 | 0.94727532 | 1.08167768 | 0.9152769 |
| A_51_P3143 | 12426.8  | Detected   | 13433.9 | Detected | 13243.1  | Detected   | 13911.6  | Detected   | Chtop         | 1.119483697 | 1.06568867 | 1.03555929 | 0.9857971 |
| A_51_P4119 | 3039     | Detected   | 2353.2  | Detected | 3047.6   | Detected   | 3402     | Detected   | Sirt5         | 1.119447187 | 1.00282988 | 1.44569097 | 1.2950875 |
| A_55_P1998 | 4390.1   | Detected   | 3496.1  | Detected | 4049.7   | Detected   | 4914.3   | Detected   | Nupl2         | 1.119405025 | 0.9224619  | 1.40565201 | 1.1583479 |
| A_55_P2080 | 10.9     | Not Detect | 19.7    | Detected | 16.4     | Not Detect | 12.2     | Not Detect | Gli1          | 1.119266055 | 1.50458716 | 0.61928934 | 0.8324873 |
| A_52_P6360 | 2873     | Detected   | 3595.9  | Detected | 2935.3   | Detected   | 3215.6   | Detected   | Gpatch4       | 1.119248173 | 1.02168465 | 0.89424066 | 0.8162908 |
| A_55_P1981 | 4160     | Detected   | 4230.5  | Detected | 4476.6   | Detected   | 4656     | Detected   | Aatf          | 1.119230769 | 1.07610577 | 1.10057913 | 1.0581728 |
| A_55_P2182 | 38.6     | Detected   | 35      | Detected | 38.4     | Detected   | 43.2     | Not Detect | LOC101056551  | 1.119170984 | 0.99481865 | 1.23428571 | 1.0971429 |
| A_52_P5634 | 968.6    | Detected   | 1462    | Detected | 740.7    | Detected   | 1084     | Detected   | Brix1         | 1.119141028 | 0.76471196 | 0.74145007 | 0.5066347 |
| A_55_P2068 | 5831.4   | Detected   | 7000.4  | Detected | 3511.2   | Detected   | 6526.1   | Detected   | Rnf19b        | 1.119130912 | 0.60211956 | 0.93224673 | 0.5015713 |
| A_51_P2662 | 10561    | Detected   | 8602.2  | Detected | 12410.6  | Detected   | 11818.5  | Detected   | Limd1         | 1.119070164 | 1.17513493 | 1.37389273 | 1.442724  |
| A_66_P1252 | 10272    | Detected   | 9775.6  | Detected | 11827.4  | Detected   | 11494.9  | Detected   | Mapk1ip1l     | 1.119051791 | 1.15142134 | 1.17587667 | 1.2098899 |
| A_55_P2410 | 8.4      | Not Detect | 21.8    | Detected | 18.4     | Detected   | 9.4      | Not Detect | Gm20556       | 1.119047619 | 2.19047619 | 0.43119266 | 0.8440367 |
| A_51_P2230 | 261.4    | Detected   | 184.9   | Detected | 245.7    | Detected   | 292.5    | Detected   | Zbed3         | 1.118974751 | 0.93993879 | 1.58193618 | 1.3288264 |
| A_52_P4936 | 5134.2   | Detected   | 5374.3  | Detected | 6558.8   | Detected   | 5744.9   | Detected   | Fgfr1op2      | 1.11894745  | 1.27747263 | 1.06895782 | 1.2204008 |
| A_52_P1992 | 8074.1   | Detected   | 9804.6  | Detected | 7111.3   | Detected   | 9034.4   | Detected   | Urgcp         | 1.118935857 | 0.88075451 | 0.92144504 | 0.7253024 |
| A_55_P2350 | 180      | Detected   | 180.9   | Detected | 142.5    | Detected   | 201.4    | Detected   | 4933405D12Rik | 1.118888889 | 0.79166667 | 1.11332228 | 0.787728  |
| A_52_P5895 | 662      | Detected   | 763     | Detected | 837.9    | Detected   | 740.7    | Detected   | Nr2c1         | 1.118882175 | 1.26570997 | 0.97077326 | 1.0981651 |
| A_55_P2103 | 95.9     | Detected   | 89.2    | Detected | 94.7     | Detected   | 107.3    | Detected   | Arid1b        | 1.118873827 | 0.98748697 | 1.2029148  | 1.0616592 |
| A_55_P1975 | 12945.8  | Detected   | 14136.8 | Detected | 14606.4  | Detected   | 14484.4  | Detected   | Prps1l3       | 1.118849357 | 1.12827326 | 1.02458831 | 1.0332183 |
| A_52_P3475 | 68979.6  | Detected   | 75967.9 | Detected | 93701.2  | Detected   | 77175    | Detected   | Ndufa7        | 1.118809039 | 1.35839002 | 1.01588961 | 1.2334315 |
| A_55_P1987 | 736.5    | Detected   | 786.5   | Detected | 640.8    | Detected   | 824      | Detected   | Ccnc          | 1.11880516  | 0.8700611  | 1.04767959 | 0.8147489 |
| A_51_P3620 | 72.4     | Detected   | 72.2    | Detected | 68.9     | Detected   | 81       | Detected   | Lrrc3b        | 1.11878453  | 0.95165746 | 1.12188366 | 0.9542936 |
| A_55_P1953 | 4686     | Detected   | 4048.1  | Detected | 5274.6   | Detected   | 5242.3   | Detected   | Pla2g16       | 1.118715322 | 1.12560819 | 1.29500259 | 1.3029816 |
| A_52_P1196 | 1866.9   | Detected   | 2021.7  | Detected | 1788     | Detected   | 2088.4   | Detected   | Rock1         | 1.118645884 | 0.95773743 | 1.03299204 | 0.8844042 |
| A_55_P2225 | 719.8    | Detected   | 724.3   | Detected | 805.9    | Detected   | 805.2    | Detected   | Mettl4        | 1.118644068 | 1.11961656 | 1.11169405 | 1.1126605 |
| A_51_P1439 | 21555.4  | Detected   | 25074.1 | Detected | 24314.3  | Detected   | 24112.1  | Detected   | Tm9sf2        | 1.11861065  | 1.12799113 | 0.96163372 | 0.9696978 |
| A_51_P3905 | 25.3     | Detected   | 26.8    | Detected | 40.9     | Detected   | 28.3     | Not Detect | Mpeg1         | 1.118577075 | 1.61660079 | 1.05597015 | 1.5261194 |
| A_52_P3695 | 408.3    | Detected   | 287.3   | Detected | 397.7    | Detected   | 456.7    | Detected   | Atm           | 1.118540289 | 0.9740387  | 1.58962757 | 1.3842673 |
| A_55_P1966 | 379.8    | Detected   | 282.6   | Detected | 321.9    | Detected   | 424.8    | Detected   | Zfp40         | 1.118483412 | 0.84755134 | 1.50318471 | 1.1390658 |
| A_52_P6802 | 76       | Detected   | 87.3    | Detected | 93.7     | Detected   | 85       | Detected   | Ace           | 1.118421053 | 1.23289474 | 0.97365407 | 1.0733104 |
| A_55_P2162 | 297.3    | Detected   | 297.6   | Detected | 292.4    | Detected   | 332.5    | Detected   | Rab5b         | 1.118398924 | 0.98351833 | 1.11727151 | 0.9825269 |
| A_55_P2097 | 50.7     | Detected   | 33.5    | Detected | 43.5     | Detected   | 56.7     | Detected   | Msh4          | 1.118343195 | 0.85798817 | 1.69253731 | 1.2985075 |
| A_55_P2121 | 178.3    | Detected   | 157.9   | Detected | 183.4    | Detected   | 199.4    | Detected   | Acaca         | 1.118339877 | 1.02860348 | 1.26282457 | 1.1614946 |
| A_55_P2024 | 3936.6   | Detected   | 4290.2  | Detected | 4181.9   | Detected   | 4402.3   | Detected   | Crtc2         | 1.118300056 | 1.06231266 | 1.02612932 | 0.9747564 |
| A_55_P1960 | 116428.6 | Detected   | 134422  | Detected | 131557.4 | Detected   | 130182.4 | Detected   | Ybx3          | 1.118130769 | 1.12994058 | 0.96846052 | 0.9786895 |
| A_52_P1772 | 1862.7   | Detected   | 1592.9  | Detected | 2128.2   | Detected   | 2082.7   | Detected   | Snx24         | 1.118108123 | 1.14253503 | 1.30748948 | 1.3360537 |
| A_51_P3542 | 29802    | Detected   | 35045   | Detected | 33658.9  | Detected   | 33320.3  | Detected   | Cluh          | 1.118055835 | 1.12941749 | 0.95078613 | 0.960448  |
| A_55_P1970 | 36110.3  | Detected   | 37597.1 | Detected | 35244.4  | Detected   | 40372    | Detected   | Hdac1         | 1.118018959 | 0.97602069 | 1.07380622 | 0.9374234 |
| A_55_P1988 | 16.1     | Detected   | 17.5    | Detected | 12       | Not Detect | 18       | Not Detect | Gm13089       | 1.118012422 | 0.74534161 | 1.02857143 | 0.6857143 |

|            |          |            |          |          |          |            |          |            |               |             |            |            |           |
|------------|----------|------------|----------|----------|----------|------------|----------|------------|---------------|-------------|------------|------------|-----------|
| A_55_P1958 | 27225    | Detected   | 33998.5  | Detected | 30819.6  | Detected   | 30436.1  | Detected   | Ncln          | 1.11794674  | 1.13203306 | 0.89521891 | 0.9064988 |
| A_51_P4242 | 113.7    | Detected   | 139.8    | Detected | 81.9     | Detected   | 127.1    | Detected   | Mt4           | 1.117854002 | 0.72031662 | 0.90915594 | 0.5858369 |
| A_55_P2025 | 3235.5   | Detected   | 2466.1   | Detected | 3414.2   | Detected   | 3616.8   | Detected   | Hnrrnpul1     | 1.117848864 | 1.05523103 | 1.46660719 | 1.3844532 |
| A_55_P1985 | 105.3    | Detected   | 91.7     | Detected | 85.4     | Detected   | 117.7    | Detected   | Slc32a1       | 1.117758784 | 0.81101614 | 1.28353326 | 0.9312977 |
| A_52_P4446 | 53.5     | Detected   | 96.8     | Detected | 38.1     | Detected   | 59.8     | Detected   | Rcbtb2        | 1.117757009 | 0.71214953 | 0.6177686  | 0.393595  |
| A_55_P1981 | 997.1    | Detected   | 984.6    | Detected | 1038.4   | Detected   | 1114.5   | Detected   | Myo3b         | 1.11774145  | 1.04142012 | 1.13193175 | 1.0546415 |
| A_51_P2569 | 2042.6   | Detected   | 1179     | Detected | 2552.9   | Detected   | 2283     | Detected   | Opa3          | 1.117693136 | 1.24982865 | 1.93638677 | 2.1653096 |
| A_55_P2034 | 12587.9  | Detected   | 12600.7  | Detected | 11055.8  | Detected   | 14069.4  | Detected   | Gga3          | 1.117692387 | 0.87828788 | 1.11655702 | 0.8773957 |
| A_55_P2076 | 10.2     | Not Detect | 17.4     | Detected | 9.5      | Not Detect | 11.4     | Not Detect | F5            | 1.117647059 | 0.93137255 | 0.65517241 | 0.545977  |
| A_66_P1368 | 5385.7   | Detected   | 5224     | Detected | 4931.1   | Detected   | 6019.2   | Detected   | Phrf1         | 1.117626307 | 0.91559129 | 1.15222052 | 0.9439319 |
| A_55_P2005 | 8633.3   | Detected   | 6672.3   | Detected | 11227.6  | Detected   | 9648.8   | Detected   | Egln2         | 1.117625937 | 1.30049923 | 1.44609805 | 1.6827181 |
| A_55_P2168 | 45.1     | Detected   | 65.9     | Detected | 55.1     | Detected   | 50.4     | Not Detect | Sema3g        | 1.11751663  | 1.22172949 | 0.76479514 | 0.8361153 |
| A_55_P2146 | 286.1    | Detected   | 350.6    | Detected | 525.2    | Detected   | 319.7    | Detected   | 6530403G13Rik | 1.117441454 | 1.83572178 | 0.91186537 | 1.4980034 |
| A_55_P2144 | 12307.3  | Detected   | 13934.4  | Detected | 12629.4  | Detected   | 13752.4  | Detected   | Rrp1          | 1.117418118 | 1.02617146 | 0.9869388  | 0.9063469 |
| A_51_P1940 | 42.6     | Detected   | 48.7     | Detected | 46.8     | Detected   | 47.6     | Not Detect | Glyctk        | 1.117370892 | 1.09859155 | 0.97741273 | 0.9609856 |
| A_51_P5135 | 505.3    | Detected   | 654.4    | Detected | 460.5    | Detected   | 564.6    | Detected   | Stx11         | 1.117356026 | 0.9113398  | 0.86277506 | 0.703698  |
| A_52_P8435 | 57.1     | Detected   | 57.3     | Detected | 51.5     | Detected   | 63.8     | Detected   | Dnal1         | 1.117338004 | 0.90192644 | 1.11343805 | 0.8987784 |
| A_55_P1972 | 37908.8  | Detected   | 37599.2  | Detected | 41712    | Detected   | 42356.9  | Detected   | Wars          | 1.117336872 | 1.10032499 | 1.12653727 | 1.1093853 |
| A_55_P2159 | 105032.8 | Detected   | 100498.1 | Detected | 115384.3 | Detected   | 117356   | Detected   | Rpl22l1       | 1.117327159 | 1.09855493 | 1.16774347 | 1.1481242 |
| A_55_P1993 | 379.3    | Detected   | 381.7    | Detected | 488.4    | Detected   | 423.8    | Detected   | Slc35d2       | 1.117321381 | 1.28763512 | 1.11029604 | 1.2795389 |
| A_55_P2180 | 916.6    | Detected   | 830.7    | Detected | 1042.1   | Detected   | 1024.1   | Detected   | 1500004F05Rik | 1.117281257 | 1.13691905 | 1.2328157  | 1.2544842 |
| A_55_P2059 | 708.2    | Detected   | 599.7    | Detected | 572.7    | Detected   | 791.2    | Detected   | Mapk8ip3      | 1.117198531 | 0.80866987 | 1.31932633 | 0.9549775 |
| A_55_P2183 | 11583.5  | Detected   | 10396.8  | Detected | 11295.9  | Detected   | 12940.7  | Detected   | Pisd          | 1.117166659 | 0.97517158 | 1.24468106 | 1.0864785 |
| A_51_P3394 | 16772.7  | Detected   | 13361.1  | Detected | 17463.9  | Detected   | 18736.8  | Detected   | Rab9          | 1.117101003 | 1.04120982 | 1.40233963 | 1.3070705 |
| A_55_P2243 | 286.2    | Detected   | 300      | Detected | 193.5    | Detected   | 319.7    | Detected   | B230117O15Rik | 1.117051013 | 0.67610063 | 1.06566667 | 0.645     |
| A_51_P2611 | 1942.9   | Detected   | 1835.1   | Detected | 1708     | Detected   | 2170.3   | Detected   | Ogt           | 1.117041536 | 0.87909826 | 1.18266035 | 0.9307395 |
| A_52_P4844 | 195      | Detected   | 180.1    | Detected | 204.8    | Detected   | 217.8    | Detected   | Zfp27         | 1.116923077 | 1.05025641 | 1.20932815 | 1.137146  |
| A_55_P2066 | 11508.9  | Detected   | 11900.8  | Detected | 11275.6  | Detected   | 12854.2  | Detected   | Baiap2l2      | 1.116892144 | 0.97972873 | 1.08011226 | 0.9474657 |
| A_52_P6720 | 22890.1  | Detected   | 16624.4  | Detected | 24909.2  | Detected   | 25565.6  | Detected   | Stt3b         | 1.116884592 | 1.08820844 | 1.53783595 | 1.4983518 |
| A_51_P2888 | 5037.6   | Detected   | 4645.7   | Detected | 6055.6   | Detected   | 5626.4   | Detected   | Tbc1d15       | 1.116881054 | 1.20208036 | 1.21109844 | 1.3034849 |
| A_51_P3712 | 1700.7   | Detected   | 1372.9   | Detected | 1761.1   | Detected   | 1899.4   | Detected   | Rwdd2b        | 1.116834245 | 1.03551479 | 1.38349479 | 1.2827591 |
| A_55_P2168 | 186.6    | Detected   | 235      | Detected | 187.2    | Detected   | 208.4    | Detected   | Grcc10        | 1.116827438 | 1.00321543 | 0.88680851 | 0.7965957 |
| A_55_P2120 | 226.1    | Detected   | 271.8    | Detected | 254.9    | Detected   | 252.5    | Detected   | Dzip1l        | 1.116762494 | 1.12737727 | 0.92899191 | 0.9378219 |
| A_52_P4247 | 286.2    | Detected   | 286.2    | Detected | 302.1    | Detected   | 319.6    | Detected   | Rbbp4         | 1.116701607 | 1.05555556 | 1.11670161 | 1.0555556 |
| A_55_P1980 | 167622.5 | Detected   | 138699   | Detected | 189129.5 | Detected   | 187176.3 | Detected   | Arpc2         | 1.116653791 | 1.12830616 | 1.34951442 | 1.3635967 |
| A_51_P3945 | 86.6     | Detected   | 71.1     | Detected | 75.1     | Detected   | 96.7     | Detected   | Snx22         | 1.116628176 | 0.86720554 | 1.36005626 | 1.0562588 |
| A_55_P2074 | 18762.1  | Detected   | 18703.7  | Detected | 15001.6  | Detected   | 20947.4  | Detected   | Fbxo6         | 1.116474169 | 0.79956934 | 1.11996022 | 0.8020659 |
| A_51_P4456 | 18944.5  | Detected   | 18017.7  | Detected | 23138.4  | Detected   | 21148.9  | Detected   | Hsd17b4       | 1.116360949 | 1.22137824 | 1.17378467 | 1.2842039 |
| A_51_P2940 | 3603.7   | Detected   | 3701.3   | Detected | 2656.8   | Detected   | 4022.2   | Detected   | Prkar1a       | 1.116130644 | 0.73724228 | 1.08669927 | 0.7178019 |
| A_55_P2079 | 63875.9  | Detected   | 54944.5  | Detected | 72267.2  | Detected   | 71289    | Detected   | LOC101055761  | 1.116054725 | 1.13136879 | 1.2974729  | 1.3152763 |

|            |          |          |          |          |          |          |          |            |              |             |            |            |           |
|------------|----------|----------|----------|----------|----------|----------|----------|------------|--------------|-------------|------------|------------|-----------|
| A_66_P1217 | 1166.2   | Detected | 608.6    | Detected | 1282.5   | Detected | 1301.5   | Detected   | Arhgef28     | 1.116017836 | 1.0997256  | 2.13851462 | 2.1072954 |
| A_55_P2025 | 20830.4  | Detected | 20341.9  | Detected | 23729.8  | Detected | 23244.9  | Detected   | Ss18         | 1.11591232  | 1.1391908  | 1.14271037 | 1.1665479 |
| A_51_P1510 | 27015.1  | Detected | 28503.1  | Detected | 30884.6  | Detected | 30145.3  | Detected   | Pmpcb        | 1.115868533 | 1.14323471 | 1.05761479 | 1.0835523 |
| A_55_P2040 | 1529.9   | Detected | 1304.2   | Detected | 1455.4   | Detected | 1707.1   | Detected   | Ptchd4       | 1.115824564 | 0.95130401 | 1.30892501 | 1.1159331 |
| A_55_P2246 | 615.4    | Detected | 617.8    | Detected | 511.2    | Detected | 686.6    | Detected   | A430017K17   | 1.115697108 | 0.83067923 | 1.1113629  | 0.8274522 |
| A_51_P2190 | 7627.2   | Detected | 5619.5   | Detected | 8978.4   | Detected | 8509.2   | Detected   | Wdr53        | 1.115638767 | 1.17715544 | 1.51422724 | 1.5977222 |
| A_55_P2091 | 14754.1  | Detected | 12019.3  | Detected | 16275    | Detected | 16459.2  | Detected   | Psmg1        | 1.115567876 | 1.10308321 | 1.36939755 | 1.3540722 |
| A_55_P2073 | 2333.3   | Detected | 3051.3   | Detected | 1908.3   | Detected | 2602.8   | Detected   | Eif2b3       | 1.11550165  | 0.81785454 | 0.85301347 | 0.6254056 |
| A_52_P5519 | 615      | Detected | 478.5    | Detected | 634.5    | Detected | 686      | Detected   | Arhgap5      | 1.115447154 | 1.03170732 | 1.43364681 | 1.3260188 |
| A_66_P1261 | 111.8    | Detected | 100.6    | Detected | 87.3     | Detected | 124.7    | Detected   | Flt3         | 1.115384615 | 0.78085868 | 1.23956262 | 0.8677932 |
| A_51_P3843 | 96.2     | Detected | 93.7     | Detected | 60.6     | Detected | 107.3    | Detected   | Sacs         | 1.115384615 | 0.62993763 | 1.14514408 | 0.6467449 |
| A_55_P2386 | 44.2     | Detected | 41.2     | Detected | 30.8     | Detected | 49.3     | Detected   | Cep63        | 1.115384615 | 0.69683258 | 1.19660194 | 0.7475728 |
| A_55_P2146 | 8794.7   | Detected | 8813.6   | Detected | 7714.3   | Detected | 9808.8   | Detected   | Rs1          | 1.115308083 | 0.87715329 | 1.1129164  | 0.8752723 |
| A_55_P2087 | 1027     | Detected | 1411.2   | Detected | 823.9    | Detected | 1145.4   | Detected   | Mthfsd       | 1.115287244 | 0.80223953 | 0.81164966 | 0.5838294 |
| A_55_P2211 | 157.9    | Detected | 157.9    | Detected | 119.1    | Detected | 176.1    | Detected   | E130101M22   | 1.115262825 | 0.75427486 | 1.11526282 | 0.7542749 |
| A_55_P2035 | 6538.2   | Detected | 5617     | Detected | 4746.5   | Detected | 7291.6   | Detected   | Vma21        | 1.115230492 | 0.72596433 | 1.29813067 | 0.845024  |
| A_51_P4994 | 562.4    | Detected | 439.9    | Detected | 509      | Detected | 627.2    | Detected   | Prkd2        | 1.115220484 | 0.90504979 | 1.42577859 | 1.1570812 |
| A_55_P2076 | 435.7    | Detected | 445.1    | Detected | 479.6    | Detected | 485.9    | Detected   | Sort1        | 1.115216892 | 1.1007574  | 1.09166479 | 1.0775107 |
| A_51_P3708 | 21.7     | Detected | 30.9     | Detected | 23.9     | Detected | 24.2     | Not Detect | Olf1143      | 1.115207373 | 1.10138249 | 0.78317152 | 0.7734628 |
| A_65_P1391 | 51545.8  | Detected | 51954.8  | Detected | 68733.9  | Detected | 57482.4  | Detected   | Ndufb2       | 1.115171362 | 1.33345297 | 1.10639248 | 1.3229557 |
| A_55_P1982 | 447.7    | Detected | 243.6    | Detected | 408.7    | Detected | 499.2    | Detected   | LOC101055862 | 1.115032388 | 0.91288809 | 2.04926108 | 1.6777504 |
| A_52_P3151 | 88940.3  | Detected | 102367.1 | Detected | 106288.6 | Detected | 99171.2  | Detected   | Mrpl52       | 1.115031094 | 1.19505556 | 0.96878001 | 1.0383082 |
| A_55_P2109 | 392899.1 | Detected | 421907   | Detected | 380411.9 | Detected | 438094.6 | Detected   | Milr1        | 1.115030806 | 0.96821779 | 1.0383677  | 0.9016487 |
| A_55_P2053 | 16761    | Detected | 14002.1  | Detected | 16926.7  | Detected | 18687.6  | Detected   | Fam20b       | 1.114945409 | 1.00988604 | 1.33462838 | 1.2088687 |
| A_55_P1974 | 25746.2  | Detected | 24983.5  | Detected | 31094.5  | Detected | 28695.4  | Detected   | Cfl1         | 1.114548943 | 1.20773163 | 1.14857406 | 1.2446014 |
| A_55_P2041 | 148455.2 | Detected | 165592.3 | Detected | 170645.4 | Detected | 165449   | Detected   | Gm6404       | 1.114470898 | 1.14947405 | 0.99913462 | 1.0305153 |
| A_52_P5805 | 96.1     | Detected | 86.3     | Detected | 70.4     | Detected | 107.1    | Detected   | Nppa         | 1.1144641   | 0.73257024 | 1.2410197  | 0.815759  |
| A_55_P2134 | 31816.3  | Detected | 35897.8  | Detected | 28157.5  | Detected | 35458.1  | Detected   | Hmgb1        | 1.114463341 | 0.88500234 | 0.98775134 | 0.7843795 |
| A_52_P5154 | 103914.1 | Detected | 141763.3 | Detected | 91645.6  | Detected | 115805.5 | Detected   | Atp1a1       | 1.114434903 | 0.88193614 | 0.81689337 | 0.6464691 |
| A_52_P4138 | 1687.5   | Detected | 1592.3   | Detected | 1922.2   | Detected | 1880.6   | Detected   | Slc35a3      | 1.11442963  | 1.13908148 | 1.18105885 | 1.2071846 |
| A_55_P2199 | 551.8    | Detected | 492.8    | Detected | 513.9    | Detected | 614.9    | Detected   | Gm9886       | 1.114353026 | 0.93131569 | 1.24776786 | 1.0428166 |
| A_52_P4883 | 1258.7   | Detected | 1394.2   | Detected | 1144.2   | Detected | 1402.6   | Detected   | Ndel1        | 1.114324303 | 0.90903313 | 1.00602496 | 0.8206857 |
| A_52_P4338 | 737.8    | Detected | 1058.4   | Detected | 920.9    | Detected | 822.1    | Detected   | Naa16        | 1.114258607 | 1.24817024 | 0.77673847 | 0.8700869 |
| A_52_P1625 | 1890.7   | Detected | 1472.7   | Detected | 2983.1   | Detected | 2106.5   | Detected   | Ahcyl2       | 1.114137621 | 1.57777543 | 1.43036599 | 2.0255992 |
| A_55_P1954 | 214538.1 | Detected | 198108.1 | Detected | 218366.6 | Detected | 239013.3 | Detected   | Emp1         | 1.114083233 | 1.01784532 | 1.20647919 | 1.1022598 |
| A_52_P2091 | 25955.4  | Detected | 20585.9  | Detected | 33106.9  | Detected | 28912.5  | Detected   | Mrpl41       | 1.113930049 | 1.27553033 | 1.40448074 | 1.6082318 |
| A_52_P5458 | 1206.3   | Detected | 1349     | Detected | 1431     | Detected | 1343.7   | Detected   | Tssc1        | 1.113902014 | 1.18627207 | 0.99607116 | 1.0607858 |
| A_51_P1944 | 238      | Detected | 1104.7   | Detected | 206.7    | Detected | 265.1    | Detected   | Wfdc1        | 1.113865546 | 0.86848739 | 0.23997465 | 0.1871096 |
| A_55_P1962 | 9162.9   | Detected | 9472.3   | Detected | 7647.1   | Detected | 10206    | Detected   | Trim11       | 1.113839505 | 0.83457202 | 1.07745743 | 0.8073118 |
| A_55_P2008 | 209133.5 | Detected | 211144.3 | Detected | 219555   | Detected | 232938.8 | Detected   | Eef1a1       | 1.113828248 | 1.04983181 | 1.10322088 | 1.0398339 |

|            |         |          |          |            |          |            |          |            |                |             |            |            |           |
|------------|---------|----------|----------|------------|----------|------------|----------|------------|----------------|-------------|------------|------------|-----------|
| A_55_P1980 | 9144.2  | Detected | 7253.6   | Detected   | 8785.6   | Detected   | 10184.2  | Detected   | Sbno1          | 1.113733295 | 0.96078388 | 1.40402007 | 1.2112055 |
| A_55_P1962 | 77.4    | Detected | 106      | Detected   | 10.3     | Not Detect | 86.2     | Detected   | Osr1           | 1.11369509  | 0.13307494 | 0.81320755 | 0.0971698 |
| A_52_P4863 | 14177.3 | Detected | 15128.2  | Detected   | 14044.2  | Detected   | 15787.5  | Detected   | Fzr1           | 1.113575928 | 0.99061175 | 1.04358086 | 0.9283457 |
| A_55_P1958 | 27.3    | Detected | 23.5     | Detected   | 20.7     | Detected   | 30.4     | Not Detect | Rbm33          | 1.113553114 | 0.75824176 | 1.29361702 | 0.8808511 |
| A_55_P2369 | 18.5    | Detected | 15.9     | Not Detect | 13.2     | Not Detect | 20.6     | Not Detect | LOC545086      | 1.113513514 | 0.71351351 | 1.29559748 | 0.8301887 |
| A_55_P2111 | 428.3   | Detected | 429.1    | Detected   | 443.2    | Detected   | 476.9    | Detected   | Pcp2           | 1.113471866 | 1.0347887  | 1.11139595 | 1.0328595 |
| A_52_P6252 | 1007.3  | Detected | 970.6    | Detected   | 999.9    | Detected   | 1121.6   | Detected   | Accs           | 1.113471657 | 0.99265363 | 1.15557387 | 1.0301875 |
| A_55_P2070 | 1032    | Detected | 938.1    | Detected   | 989.6    | Detected   | 1149.1   | Detected   | Tra2b          | 1.113468992 | 0.95891473 | 1.22492272 | 1.0548982 |
| A_55_P2166 | 96.1    | Detected | 109.4    | Detected   | 104.9    | Detected   | 107      | Detected   | 2310079G19Rik  | 1.113423517 | 1.09157128 | 0.97806216 | 0.9588665 |
| A_51_P3393 | 132.3   | Detected | 152.5    | Detected   | 152      | Detected   | 147.3    | Detected   | Tmem81         | 1.113378685 | 1.14890401 | 0.96590164 | 0.9967213 |
| A_51_P1228 | 3291.9  | Detected | 3027.8   | Detected   | 3120.2   | Detected   | 3665     | Detected   | Naa50          | 1.113338801 | 0.94784167 | 1.21044983 | 1.0305172 |
| A_55_P2115 | 254.2   | Detected | 190.5    | Detected   | 404.4    | Detected   | 283      | Detected   | Lcor           | 1.113296617 | 1.59087333 | 1.4855643  | 2.1228346 |
| A_55_P1959 | 4524.2  | Detected | 6215.3   | Detected   | 2311.7   | Detected   | 5036.6   | Detected   | Pmepa1         | 1.113257593 | 0.51096326 | 0.81035509 | 0.371937  |
| A_55_P2426 | 707.6   | Detected | 697.5    | Detected   | 490.3    | Detected   | 787.7    | Detected   | LOC552906      | 1.113199548 | 0.6929056  | 1.129319   | 0.7029391 |
| A_55_P2025 | 76      | Detected | 64.1     | Detected   | 55.2     | Detected   | 84.6     | Detected   | Zfp932         | 1.113157895 | 0.72631579 | 1.31981279 | 0.8611544 |
| A_55_P2064 | 68038.5 | Detected | 60381.6  | Detected   | 83142.9  | Detected   | 75734.1  | Detected   | Gm8580         | 1.11310655  | 1.22199784 | 1.25425792 | 1.3769575 |
| A_51_P3958 | 3342.3  | Detected | 3698.8   | Detected   | 4735     | Detected   | 3720.1   | Detected   | Timm21         | 1.113035933 | 1.41668911 | 1.00575862 | 1.2801449 |
| A_52_P6505 | 40.7    | Detected | 39.2     | Detected   | 37.4     | Detected   | 45.3     | Detected   | Nlfp3          | 1.113022113 | 0.91891892 | 1.15561224 | 0.9540816 |
| A_55_P2107 | 789.2   | Detected | 968.3    | Detected   | 855      | Detected   | 878.3    | Detected   | Gemin2         | 1.112899138 | 1.08337557 | 0.9070536  | 0.8829908 |
| A_66_P1085 | 28640.4 | Detected | 31768.6  | Detected   | 30103.9  | Detected   | 31871.2  | Detected   | Xrcc6          | 1.112805687 | 1.05109915 | 1.0032296  | 0.9475992 |
| A_51_P3941 | 33970.1 | Detected | 21255.3  | Detected   | 53926    | Detected   | 37801.5  | Detected   | Lmo4           | 1.112787422 | 1.58745485 | 1.77845055 | 2.5370613 |
| A_55_P2103 | 2749.6  | Detected | 2668.2   | Detected   | 2356.8   | Detected   | 3059.6   | Detected   | Zfp316         | 1.112743672 | 0.85714286 | 1.14669065 | 0.8832921 |
| A_55_P1979 | 4479.6  | Detected | 4455.3   | Detected   | 4524.8   | Detected   | 4984.3   | Detected   | Ubap1          | 1.112666309 | 1.01009019 | 1.11873499 | 1.0155994 |
| A_55_P2343 | 38.2    | Detected | 35       | Detected   | 33.8     | Detected   | 42.5     | Not Detect | 4930532103Rik  | 1.112565445 | 0.88481675 | 1.21428571 | 0.9657143 |
| A_55_P2090 | 123.5   | Detected | 175.1    | Detected   | 98.3     | Detected   | 137.4    | Detected   | Pilra          | 1.112550607 | 0.79595142 | 0.78469446 | 0.5613935 |
| A_55_P2033 | 4367.7  | Detected | 4490.3   | Detected   | 3926.7   | Detected   | 4858.7   | Detected   | Cabp5          | 1.112416146 | 0.89903153 | 1.08204352 | 0.874485  |
| A_55_P1990 | 89998.1 | Detected | 95392.4  | Detected   | 98822.6  | Detected   | 100108.7 | Detected   | Psmd4          | 1.112342372 | 1.09805207 | 1.04944105 | 1.0359588 |
| A_55_P2100 | 376.8   | Detected | 373.5    | Detected   | 391.4    | Detected   | 419.1    | Detected   | Olf1402        | 1.112261146 | 1.03874735 | 1.12208835 | 1.047925  |
| A_55_P2388 | 2311.7  | Detected | 2148.2   | Detected   | 2223.8   | Detected   | 2571.1   | Detected   | 1010001B22Rik  | 1.112211792 | 0.96197603 | 1.19686249 | 1.0351923 |
| A_52_P3077 | 1272.1  | Detected | 1361.3   | Detected   | 832.4    | Detected   | 1414.6   | Detected   | Slc12a9        | 1.112019495 | 0.65435107 | 1.03915375 | 0.6114743 |
| A_55_P2083 | 6750.2  | Detected | 5985.7   | Detected   | 6372     | Detected   | 7506     | Detected   | Dis3l          | 1.111967053 | 0.94397203 | 1.25398867 | 1.0645371 |
| A_55_P2048 | 29459   | Detected | 28394.6  | Detected   | 34949.2  | Detected   | 32756.2  | Detected   | Ss18           | 1.111925048 | 1.18636749 | 1.15360667 | 1.2308397 |
| A_52_P4125 | 1856.6  | Detected | 1344.4   | Detected   | 1638.1   | Detected   | 2064.4   | Detected   | Fbxo3          | 1.111925024 | 0.88231175 | 1.53555489 | 1.2184618 |
| A_55_P2114 | 327106  | Detected | 357237.9 | Detected   | 337152.3 | Detected   | 363679.3 | Detected   | 1700047117Rik2 | 1.11180871  | 1.03071267 | 1.01803112 | 0.9437753 |
| A_55_P2145 | 61054.2 | Detected | 70760.8  | Detected   | 74385.8  | Detected   | 67879.4  | Detected   | Phb            | 1.111789197 | 1.2183568  | 0.95927971 | 1.0512289 |
| A_66_P1345 | 1786.4  | Detected | 2000.7   | Detected   | 2444.7   | Detected   | 1986.1   | Detected   | Atl2           | 1.111789073 | 1.36850649 | 0.99270255 | 1.2219223 |
| A_55_P2119 | 26788.8 | Detected | 26701.9  | Detected   | 38284.7  | Detected   | 29779.8  | Detected   | Ndufb2         | 1.111651138 | 1.42913083 | 1.11526895 | 1.4337819 |
| A_66_P1228 | 105.7   | Detected | 105.2    | Detected   | 87.6     | Detected   | 117.5    | Detected   | Spata31        | 1.111636708 | 0.82876064 | 1.11692015 | 0.8326996 |
| A_55_P2040 | 5956.1  | Detected | 4925.2   | Detected   | 6554     | Detected   | 6620.5   | Detected   | Zwilch         | 1.111549504 | 1.10038448 | 1.34420937 | 1.3307074 |
| A_52_P4832 | 15217.5 | Detected | 11826.9  | Detected   | 10532.9  | Detected   | 16914.9  | Detected   | Lamp2          | 1.111542632 | 0.69215706 | 1.43020572 | 0.8905884 |

|            |          |          |          |            |          |            |          |            |               |             |            |            |           |
|------------|----------|----------|----------|------------|----------|------------|----------|------------|---------------|-------------|------------|------------|-----------|
| A_55_P2130 | 31589.5  | Detected | 27503.2  | Detected   | 25732.7  | Detected   | 35112.7  | Detected   | Cnn3          | 1.11153073  | 0.81459662 | 1.2766769  | 0.9356257 |
| A_52_P3038 | 53.8     | Detected | 45.5     | Detected   | 50.6     | Detected   | 59.8     | Detected   | Gm5296        | 1.111524164 | 0.94052045 | 1.31428571 | 1.1120879 |
| A_55_P2170 | 39363.6  | Detected | 34744.8  | Detected   | 43532.3  | Detected   | 43752    | Detected   | Gspt1         | 1.111483706 | 1.10590241 | 1.25923879 | 1.2529155 |
| A_55_P2012 | 1470.3   | Detected | 909.5    | Detected   | 2659.5   | Detected   | 1634.2   | Detected   | Ccdc64        | 1.111473849 | 1.80881453 | 1.79681143 | 2.9241341 |
| A_51_P3639 | 145.4    | Detected | 145.4    | Detected   | 175.3    | Detected   | 161.6    | Detected   | Slc25a23      | 1.111416781 | 1.20563961 | 1.11141678 | 1.2056396 |
| A_55_P2098 | 2595.5   | Detected | 2353.4   | Detected   | 1744.3   | Detected   | 2884.6   | Detected   | Lrrcc1        | 1.11138509  | 0.67204777 | 1.22571599 | 0.741183  |
| A_52_P6187 | 54.8     | Detected | 43.9     | Detected   | 30.1     | Detected   | 60.9     | Detected   | Hs1bp3        | 1.111313869 | 0.54927007 | 1.38724374 | 0.6856492 |
| A_65_P1177 | 7181.9   | Detected | 7415.7   | Detected   | 9891.5   | Detected   | 7981.1   | Detected   | Adi1          | 1.111279745 | 1.37728178 | 1.07624365 | 1.3338592 |
| A_52_P4962 | 21336.4  | Detected | 20455.9  | Detected   | 21238.1  | Detected   | 23710.7  | Detected   | Exosc8        | 1.111279316 | 0.99539285 | 1.15911302 | 1.0382384 |
| A_51_P2147 | 9322.7   | Detected | 8925     | Detected   | 9226.7   | Detected   | 10358.7  | Detected   | Suz12         | 1.111126605 | 0.98970255 | 1.16063866 | 1.0338039 |
| A_55_P2221 | 19.8     | Detected | 5.8      | Not Detect | 12.9     | Not Detect | 22       | Not Detect | 9230106L01Rik | 1.111111111 | 0.65151515 | 3.79310345 | 2.2241379 |
| A_55_P2238 | 32.4     | Detected | 17.8     | Detected   | 20       | Detected   | 36       | Not Detect | 6330407A03Rik | 1.111111111 | 0.61728395 | 2.02247191 | 1.1235955 |
| A_51_P1418 | 13240    | Detected | 11238.9  | Detected   | 11370.9  | Detected   | 14709.8  | Detected   | Mrpl32        | 1.111012085 | 0.85882931 | 1.30882916 | 1.0117449 |
| A_55_P1996 | 45.1     | Detected | 56       | Detected   | 41.2     | Detected   | 50.1     | Not Detect | Cilp2         | 1.110864745 | 0.9135255  | 0.89464286 | 0.7357143 |
| A_66_P1017 | 1192.9   | Detected | 927.2    | Detected   | 936.7    | Detected   | 1325.1   | Detected   | Krtap5-5      | 1.110822366 | 0.78522927 | 1.4291415  | 1.0102459 |
| A_51_P2872 | 30926.1  | Detected | 26069.3  | Detected   | 36654.6  | Detected   | 34353.3  | Detected   | Qars          | 1.110819017 | 1.18523189 | 1.31776841 | 1.4060447 |
| A_55_P1973 | 120473.9 | Detected | 111440.6 | Detected   | 130893.1 | Detected   | 133820.9 | Detected   | Hist2h4       | 1.110787482 | 1.08648512 | 1.20082717 | 1.1745549 |
| A_55_P2008 | 85953    | Detected | 71602.3  | Detected   | 87279    | Detected   | 95475    | Detected   | Prelid1       | 1.110781474 | 1.01542704 | 1.33340689 | 1.2189413 |
| A_55_P2063 | 17143.1  | Detected | 18709    | Detected   | 10867.7  | Detected   | 19042.1  | Detected   | Zfand2a       | 1.110773431 | 0.63394019 | 1.01780427 | 0.5808809 |
| A_55_P2106 | 1299.5   | Detected | 1059.3   | Detected   | 1314.8   | Detected   | 1443.4   | Detected   | 4930432K21Rik | 1.110734898 | 1.01177376 | 1.36259794 | 1.241197  |
| A_51_P4303 | 15391.5  | Detected | 15641.4  | Detected   | 14542.2  | Detected   | 17092.6  | Detected   | Lrp10         | 1.110522041 | 0.94482019 | 1.09277942 | 0.929725  |
| A_51_P2755 | 713.9    | Detected | 563.9    | Detected   | 559.4    | Detected   | 792.8    | Detected   | Zfp292        | 1.110519681 | 0.78358313 | 1.40592304 | 0.9920199 |
| A_52_P4739 | 6700.5   | Detected | 7772.5   | Detected   | 6418.4   | Detected   | 7441     | Detected   | Cpsf4         | 1.110514141 | 0.95789866 | 0.95734963 | 0.8257832 |
| A_55_P2117 | 25398.7  | Detected | 28268.6  | Detected   | 30599.3  | Detected   | 28205.5  | Detected   | Mtx1          | 1.110509593 | 1.20475851 | 0.99776784 | 1.0824484 |
| A_55_P2097 | 2038.1   | Detected | 1979.3   | Detected   | 1777.6   | Detected   | 2263.3   | Detected   | Gtpbp4        | 1.110495069 | 0.87218488 | 1.14348507 | 0.8980953 |
| A_55_P2159 | 468.8    | Detected | 398.8    | Detected   | 510      | Detected   | 520.6    | Detected   | Zfp59         | 1.110494881 | 1.08788396 | 1.30541625 | 1.2788365 |
| A_52_P1831 | 839.7    | Detected | 1087.6   | Detected   | 1103     | Detected   | 932.4    | Detected   | Txnl1         | 1.11039657  | 1.31356437 | 0.85730048 | 1.0141596 |
| A_55_P2008 | 30700.9  | Detected | 36954.2  | Detected   | 37437.9  | Detected   | 34088    | Detected   | Snrpd3        | 1.110325756 | 1.21943982 | 0.92243913 | 1.0130892 |
| A_55_P2034 | 1372.9   | Detected | 1381.6   | Detected   | 1499.8   | Detected   | 1524.3   | Detected   | Ankhd1        | 1.110277515 | 1.09243208 | 1.10328605 | 1.085553  |
| A_51_P3831 | 2820.6   | Detected | 1842.7   | Detected   | 2264.3   | Detected   | 3131.5   | Detected   | Slk           | 1.110224775 | 0.80277246 | 1.69940848 | 1.2287947 |
| A_51_P1562 | 35743.9  | Detected | 30052.9  | Detected   | 47342.2  | Detected   | 39683.3  | Detected   | Ltbr          | 1.110211812 | 1.32448334 | 1.32044828 | 1.5752956 |
| A_52_P6341 | 1011.3   | Detected | 1198.2   | Detected   | 961      | Detected   | 1122.7   | Detected   | Rexo1         | 1.110155246 | 0.95026204 | 0.93698882 | 0.8020364 |
| A_55_P2102 | 1691.5   | Detected | 1686.3   | Detected   | 1568.8   | Detected   | 1877.8   | Detected   | Noc3l         | 1.11013893  | 0.92746083 | 1.11356224 | 0.9303208 |
| A_52_P8427 | 2051.2   | Detected | 2142     | Detected   | 1956.1   | Detected   | 2277.1   | Detected   | Derl2         | 1.110130655 | 0.9536369  | 1.0630719  | 0.913212  |
| A_51_P1921 | 5719.5   | Detected | 4349.9   | Detected   | 4081.7   | Detected   | 6349.3   | Detected   | Stk10         | 1.110114521 | 0.7136463  | 1.45964275 | 0.9383434 |
| A_55_P2044 | 1097.1   | Detected | 996.2    | Detected   | 1108.6   | Detected   | 1217.9   | Detected   | Marf1         | 1.110108468 | 1.01048218 | 1.22254567 | 1.1128287 |
| A_55_P2184 | 72200    | Detected | 74766.1  | Detected   | 75350.7  | Detected   | 80146.9  | Detected   | Aurkaip1      | 1.110067867 | 1.0436385  | 1.07196845 | 1.0078191 |
| A_51_P1637 | 931.4    | Detected | 768.3    | Detected   | 644.4    | Detected   | 1033.9   | Detected   | Bdp1          | 1.110049388 | 0.69186171 | 1.34569829 | 0.8387349 |
| A_51_P5069 | 29935.1  | Detected | 24759.1  | Detected   | 32738.8  | Detected   | 33225.9  | Detected   | Mrps12        | 1.109931151 | 1.09365928 | 1.3419672  | 1.3222936 |
| A_66_P1308 | 19163.8  | Detected | 25917.5  | Detected   | 22128.3  | Detected   | 21269.4  | Detected   | Eif3e         | 1.109873825 | 1.1546927  | 0.82065786 | 0.8537976 |

|            |         |            |         |            |         |          |         |            |               |             |            |            |           |
|------------|---------|------------|---------|------------|---------|----------|---------|------------|---------------|-------------|------------|------------|-----------|
| A_51_P2340 | 1646.5  | Detected   | 1840.4  | Detected   | 1585.7  | Detected | 1827.4  | Detected   | 1190005I06Rik | 1.10986942  | 0.96307319 | 0.99293632 | 0.8616062 |
| A_55_P1957 | 231.2   | Detected   | 247.1   | Detected   | 264.8   | Detected | 256.6   | Detected   | 1700034P13Rik | 1.109861592 | 1.14532872 | 1.03844597 | 1.0716309 |
| A_55_P2008 | 8467.5  | Detected   | 8284.5  | Detected   | 7961.4  | Detected | 9396.6  | Detected   | Mnd1          | 1.109725421 | 0.94023029 | 1.13423864 | 0.9609995 |
| A_55_P2028 | 215.2   | Detected   | 424.2   | Detected   | 193.5   | Detected | 238.8   | Detected   | Slc22a17      | 1.109665428 | 0.89916357 | 0.56294201 | 0.4561528 |
| A_55_P2066 | 75.7    | Detected   | 64      | Detected   | 58      | Detected | 84      | Detected   | Kcnj13        | 1.109643329 | 0.7661823  | 1.3125     | 0.90625   |
| A_55_P2163 | 186.1   | Detected   | 175.7   | Detected   | 25.7    | Detected | 206.5   | Detected   | Akr1c18       | 1.109618485 | 0.1380978  | 1.1752988  | 0.1462721 |
| A_52_P5284 | 4370.1  | Detected   | 4631.3  | Detected   | 6403.2  | Detected | 4849    | Detected   | Mfsd3         | 1.109585593 | 1.46522963 | 1.04700624 | 1.3825924 |
| A_52_P6589 | 51407.2 | Detected   | 61729.7 | Detected   | 46410.2 | Detected | 57037.4 | Detected   | Gm5396        | 1.109521623 | 0.90279572 | 0.92398635 | 0.7518293 |
| A_66_P1060 | 19901.7 | Detected   | 18219.8 | Detected   | 26227.5 | Detected | 22080.5 | Detected   | Rpa3          | 1.109478085 | 1.31785224 | 1.21189585 | 1.4395054 |
| A_55_P2116 | 2217.2  | Detected   | 2400.9  | Detected   | 2276    | Detected | 2459.9  | Detected   | Cited2        | 1.109462385 | 1.02651994 | 1.02457412 | 0.9479778 |
| A_51_P1010 | 39069.8 | Detected   | 29196.8 | Detected   | 37472.8 | Detected | 43345.5 | Detected   | Cnppd1        | 1.109437468 | 0.95912444 | 1.48459763 | 1.2834557 |
| A_55_P1971 | 345.5   | Detected   | 350.6   | Detected   | 262.6   | Detected | 383.3   | Detected   | Ankrd50       | 1.109406657 | 0.76005789 | 1.09326868 | 0.7490017 |
| A_66_P1181 | 181.9   | Detected   | 152.3   | Detected   | 178.8   | Detected | 201.8   | Detected   | Sh2d2a        | 1.10940077  | 0.98295767 | 1.32501641 | 1.1739987 |
| A_51_P2450 | 12.8    | Not Detect | 23.6    | Detected   | 34.1    | Detected | 14.2    | Not Detect | 1700011A15Rik | 1.109375    | 2.6640625  | 0.60169492 | 1.4449153 |
| A_55_P2126 | 3320.5  | Detected   | 2705    | Detected   | 4120.3  | Detected | 3683.6  | Detected   | Zdhhc13       | 1.109351001 | 1.24086734 | 1.36177449 | 1.5232163 |
| A_52_P2728 | 6302.8  | Detected   | 6797.6  | Detected   | 7601    | Detected | 6991.9  | Detected   | Cpsf1         | 1.10933236  | 1.20597195 | 1.02858362 | 1.1181888 |
| A_55_P2064 | 20905.8 | Detected   | 27875.7 | Detected   | 21141.9 | Detected | 23189.5 | Detected   | Gm12693       | 1.109237628 | 1.01129352 | 0.83188942 | 0.7584348 |
| A_51_P2426 | 29.3    | Detected   | 23.7    | Detected   | 18.6    | Detected | 32.5    | Not Detect | Otog          | 1.109215017 | 0.63481229 | 1.37130802 | 0.7848101 |
| A_55_P2046 | 244.5   | Detected   | 257.5   | Detected   | 228.6   | Detected | 271.2   | Detected   | Nbas          | 1.109202454 | 0.93496933 | 1.05320388 | 0.887767  |
| A_55_P1975 | 2783.2  | Detected   | 2448.2  | Detected   | 3137.3  | Detected | 3086.9  | Detected   | Ighmbp2       | 1.109119    | 1.12722765 | 1.26088555 | 1.2814721 |
| A_55_P2156 | 11624   | Detected   | 9706.3  | Detected   | 16310.5 | Detected | 12892.2 | Detected   | Pcyox1        | 1.109101858 | 1.40317447 | 1.32823012 | 1.6804034 |
| A_55_P2038 | 12036.1 | Detected   | 12948.5 | Detected   | 14648.9 | Detected | 13349   | Detected   | Mcat          | 1.109080184 | 1.21708028 | 1.03093022 | 1.1313202 |
| A_55_P1977 | 23463.2 | Detected   | 19141   | Detected   | 22039.8 | Detected | 26021.3 | Detected   | Picalm        | 1.109026049 | 0.93933479 | 1.35945353 | 1.1514445 |
| A_55_P2155 | 180.7   | Detected   | 158     | Detected   | 144.6   | Detected | 200.4   | Detected   | Rtp2          | 1.109020476 | 0.80022136 | 1.26835443 | 0.9151899 |
| A_55_P2148 | 130.4   | Detected   | 108.4   | Detected   | 169.8   | Detected | 144.6   | Detected   | Gm7810        | 1.108895706 | 1.30214724 | 1.33394834 | 1.5664207 |
| A_55_P2025 | 16805.5 | Detected   | 14527.9 | Detected   | 17994.2 | Detected | 18635.5 | Detected   | Akt2          | 1.108892922 | 1.0707328  | 1.28273873 | 1.2385961 |
| A_51_P1251 | 1335.7  | Detected   | 1257.5  | Detected   | 1226.1  | Detected | 1481.1  | Detected   | Coq5          | 1.108856779 | 0.91794565 | 1.17781312 | 0.9750298 |
| A_51_P2735 | 4584.2  | Detected   | 3424.2  | Detected   | 4231.6  | Detected | 5083.2  | Detected   | Fam83d        | 1.108852144 | 0.92308364 | 1.48449273 | 1.2357923 |
| A_55_P2022 | 223.3   | Detected   | 264.2   | Detected   | 298.4   | Detected | 247.6   | Detected   | 1700086O06Rik | 1.108822212 | 1.33631885 | 0.93716881 | 1.1294474 |
| A_52_P2527 | 31550.4 | Detected   | 33909.4 | Detected   | 28841.5 | Detected | 34981.4 | Detected   | Rangap1       | 1.10874664  | 0.91414055 | 1.03161365 | 0.8505459 |
| A_52_P2112 | 9.2     | Not Detect | 11.9    | Not Detect | 19.3    | Detected | 10.2    | Not Detect | Aar2          | 1.108695652 | 2.09782609 | 0.85714286 | 1.6218487 |
| A_55_P2082 | 450.2   | Detected   | 458.4   | Detected   | 486.1   | Detected | 499.1   | Detected   | Irak2         | 1.108618392 | 1.07974234 | 1.08878709 | 1.0604276 |
| A_55_P2178 | 685.9   | Detected   | 685.3   | Detected   | 450.9   | Detected | 760.4   | Detected   | Fam53b        | 1.108616416 | 0.65738446 | 1.10958704 | 0.65796   |
| A_55_P2150 | 12324.2 | Detected   | 10997.2 | Detected   | 10943.1 | Detected | 13662.8 | Detected   | Pcgf5         | 1.108615569 | 0.88793593 | 1.24238897 | 0.9950806 |
| A_55_P2091 | 100.4   | Detected   | 82.8    | Detected   | 60.8    | Detected | 111.3   | Detected   | Svil          | 1.108565737 | 0.60557769 | 1.3442029  | 0.7342995 |
| A_55_P2146 | 3181.9  | Detected   | 2921.7  | Detected   | 3712.9  | Detected | 3527.1  | Detected   | Zmynd8        | 1.108488639 | 1.16688142 | 1.20720813 | 1.2708012 |
| A_55_P2036 | 2733.6  | Detected   | 1525.2  | Detected   | 2430    | Detected | 3030.1  | Detected   | Ifnar1        | 1.108465028 | 0.88893766 | 1.98669027 | 1.5932337 |
| A_55_P2143 | 800.6   | Detected   | 835.6   | Detected   | 680.7   | Detected | 887.3   | Detected   | Sema6c        | 1.10829378  | 0.85023732 | 1.06187171 | 0.8146242 |
| A_55_P2125 | 13291.8 | Detected   | 9718    | Detected   | 14616.6 | Detected | 14731.2 | Detected   | Ube2l3        | 1.108292331 | 1.09967047 | 1.51586746 | 1.5040749 |
| A_55_P2139 | 18971.6 | Detected   | 16447   | Detected   | 17504.4 | Detected | 21026   | Detected   | 4833439L19Rik | 1.108288178 | 0.92266335 | 1.27840944 | 1.0642914 |

|            |          |            |          |          |          |            |          |            |               |             |            |            |           |
|------------|----------|------------|----------|----------|----------|------------|----------|------------|---------------|-------------|------------|------------|-----------|
| A_51_P4374 | 2718.4   | Detected   | 3242.6   | Detected | 2928.5   | Detected   | 3012.7   | Detected   | Zfp566        | 1.108262213 | 1.07728811 | 0.9291001  | 0.9031333 |
| A_55_P2038 | 63557.9  | Detected   | 64740.6  | Detected | 73519.4  | Detected   | 70433.3  | Detected   | Rbx1          | 1.10817538  | 1.15673111 | 1.08793091 | 1.1355996 |
| A_55_P2152 | 52.7     | Detected   | 44.9     | Detected | 70.7     | Detected   | 58.4     | Detected   | Myl3          | 1.108159393 | 1.34155598 | 1.30066815 | 1.5746102 |
| A_52_P4187 | 74.9     | Detected   | 73.5     | Detected | 65.5     | Detected   | 83       | Detected   | Grk4          | 1.108144192 | 0.87449933 | 1.1292517  | 0.8911565 |
| A_66_P1196 | 41711.6  | Detected   | 51084.3  | Detected | 50018.5  | Detected   | 46221.7  | Detected   | Polr2e        | 1.108125797 | 1.19915084 | 0.90481224 | 0.9791364 |
| A_55_P2115 | 1237.5   | Detected   | 1278.6   | Detected | 1234.7   | Detected   | 1371.3   | Detected   | Fastkd1       | 1.108121212 | 0.99773737 | 1.07250117 | 0.9656656 |
| A_51_P3871 | 5986.3   | Detected   | 4522.4   | Detected | 6947.7   | Detected   | 6633.1   | Detected   | Vrk3          | 1.108046707 | 1.16060004 | 1.46672121 | 1.536286  |
| A_51_P1555 | 102758.8 | Detected   | 110646.3 | Detected | 118554.1 | Detected   | 113860.2 | Detected   | Psmb4         | 1.108033357 | 1.15371238 | 1.02904661 | 1.0714692 |
| A_55_P2057 | 15787.8  | Detected   | 14591.7  | Detected | 14678.3  | Detected   | 17493.4  | Detected   | Arl4c         | 1.108032785 | 0.92972422 | 1.19885963 | 1.0059349 |
| A_51_P1112 | 44822.1  | Detected   | 19564.6  | Detected | 32579.4  | Detected   | 49657.7  | Detected   | Cdk2ap2       | 1.10788428  | 0.72686019 | 2.53814031 | 1.6652219 |
| A_55_P2111 | 3783.9   | Detected   | 3638.5   | Detected | 3393.3   | Detected   | 4191.7   | Detected   | Btf3l4        | 1.107772404 | 0.89677317 | 1.15204068 | 0.9326096 |
| A_51_P3295 | 812.1    | Detected   | 581.5    | Detected | 623.7    | Detected   | 899.5    | Detected   | Nckipsd       | 1.107622214 | 0.76800887 | 1.54686156 | 1.0725709 |
| A_55_P2205 | 76.2     | Detected   | 63.1     | Detected | 53.8     | Detected   | 84.4     | Detected   | 2610507101Rik | 1.107611549 | 0.70603675 | 1.33755943 | 0.8526149 |
| A_66_P1081 | 15.8     | Detected   | 26.7     | Detected | 21.8     | Detected   | 17.5     | Not Detect | Hist3h2bb-ps  | 1.107594937 | 1.37974684 | 0.65543071 | 0.8164794 |
| A_55_P2169 | 9.3      | Not Detect | 17.4     | Detected | 10.3     | Not Detect | 10.3     | Not Detect | Vwf           | 1.107526882 | 1.10752688 | 0.59195402 | 0.591954  |
| A_55_P1952 | 9.3      | Not Detect | 21.3     | Detected | 15.7     | Not Detect | 10.3     | Not Detect | Slitrk2       | 1.107526882 | 1.68817204 | 0.48356808 | 0.7370892 |
| A_51_P1367 | 60122    | Detected   | 51974.4  | Detected | 64415.1  | Detected   | 66581.3  | Detected   | Idh3g         | 1.107436546 | 1.07140647 | 1.28104028 | 1.2393621 |
| A_55_P2074 | 3598.5   | Detected   | 3509.5   | Detected | 3265.3   | Detected   | 3985     | Detected   | Gtf2a1        | 1.107405864 | 0.90740586 | 1.13548939 | 0.9304174 |
| A_55_P2018 | 419      | Detected   | 656.5    | Detected | 770.9    | Detected   | 464      | Detected   | Igfbp7        | 1.107398568 | 1.8398568  | 0.70677837 | 1.1742574 |
| A_55_P2117 | 681.7    | Detected   | 671.1    | Detected | 583.8    | Detected   | 754.9    | Detected   | A530017D24Rik | 1.107378612 | 0.85638844 | 1.12486962 | 0.8699151 |
| A_55_P2018 | 1416.9   | Detected   | 1268.6   | Detected | 1658.1   | Detected   | 1569     | Detected   | Ints5         | 1.107347025 | 1.17023079 | 1.23679647 | 1.3070314 |
| A_55_P2115 | 17665.6  | Detected   | 14701.5  | Detected | 17717.3  | Detected   | 19561.2  | Detected   | Ap3s1         | 1.107304592 | 1.00292659 | 1.33055811 | 1.2051355 |
| A_55_P1966 | 364675   | Detected   | 394263.4 | Detected | 379864.1 | Detected   | 403780.3 | Detected   | Gm12070       | 1.107233329 | 1.04165106 | 1.02413843 | 0.963478  |
| A_55_P2000 | 2460.1   | Detected   | 2359.3   | Detected | 2754.4   | Detected   | 2723.6   | Detected   | Cab39l        | 1.107109467 | 1.11962928 | 1.15441021 | 1.1674649 |
| A_55_P2045 | 2482.8   | Detected   | 2708.7   | Detected | 2894.9   | Detected   | 2748.6   | Detected   | Setdb2        | 1.107056549 | 1.16598196 | 1.01473031 | 1.0687415 |
| A_55_P2065 | 26518.7  | Detected   | 25430.3  | Detected | 31104.6  | Detected   | 29355.9  | Detected   | Rnf7          | 1.106988653 | 1.1729308  | 1.15436703 | 1.2231315 |
| A_55_P2335 | 467.7    | Detected   | 451      | Detected | 359.3    | Detected   | 517.7    | Detected   | Wdr45b        | 1.106906136 | 0.7682275  | 1.14789357 | 0.7966741 |
| A_55_P2048 | 1511     | Detected   | 829.1    | Detected | 1272.6   | Detected   | 1672.5   | Detected   | Gm5595        | 1.106882859 | 0.84222369 | 2.01724762 | 1.5349174 |
| A_55_P2153 | 75.8     | Detected   | 82.5     | Detected | 74.8     | Detected   | 83.9     | Detected   | Ldhc          | 1.106860158 | 0.98680739 | 1.0169697  | 0.9066667 |
| A_55_P2069 | 229206.7 | Detected   | 243531.9 | Detected | 228125.6 | Detected   | 253686.3 | Detected   | Hspa8         | 1.106801415 | 0.9952833  | 1.04169639 | 0.9367381 |
| A_55_P1990 | 762.2    | Detected   | 765.3    | Detected | 776.4    | Detected   | 843.5    | Detected   | Ift122        | 1.106664917 | 1.01863028 | 1.10218215 | 1.0145041 |
| A_52_P2727 | 2225     | Detected   | 1981.7   | Detected | 2008.5   | Detected   | 2462.3   | Detected   | Dhdds         | 1.106651685 | 0.90269663 | 1.24251905 | 1.0135237 |
| A_55_P2029 | 61094.8  | Detected   | 66264.9  | Detected | 61906.8  | Detected   | 67609.1  | Detected   | Por           | 1.106626096 | 1.01329082 | 1.02028525 | 0.9342322 |
| A_51_P2974 | 5416.6   | Detected   | 6535.5   | Detected | 5975.1   | Detected   | 5994     | Detected   | Dph1          | 1.106598235 | 1.10310896 | 0.91714482 | 0.9142529 |
| A_55_P2010 | 80.7     | Detected   | 90.2     | Detected | 62.1     | Detected   | 89.3     | Detected   | Serpina1f     | 1.106567534 | 0.76951673 | 0.99002217 | 0.6884701 |
| A_55_P2033 | 251353.8 | Detected   | 287954.4 | Detected | 305725.7 | Detected   | 278128.5 | Detected   | LOC100046223  | 1.106521962 | 1.2163162  | 0.96587689 | 1.0617157 |
| A_51_P4628 | 622.7    | Detected   | 635.7    | Detected | 602.2    | Detected   | 689      | Detected   | 9430015G10Rik | 1.106471816 | 0.96707885 | 1.08384458 | 0.9473022 |
| A_51_P1535 | 26.3     | Detected   | 34.2     | Detected | 164.5    | Detected   | 29.1     | Not Detect | 4921507P07Rik | 1.106463878 | 6.25475285 | 0.85087719 | 4.8099415 |
| A_55_P2128 | 224159.5 | Detected   | 210523.3 | Detected | 261653   | Detected   | 248023   | Detected   | Rpl18         | 1.106457679 | 1.1672626  | 1.17812613 | 1.2428696 |
| A_66_P1187 | 2995.5   | Detected   | 2270.5   | Detected | 3066.9   | Detected   | 3314.3   | Detected   | Rabif         | 1.106426306 | 1.02383575 | 1.45972253 | 1.3507597 |



|            |         |            |          |            |          |            |         |            |               |             |            |            |           |
|------------|---------|------------|----------|------------|----------|------------|---------|------------|---------------|-------------|------------|------------|-----------|
| A_52_P5073 | 24494.2 | Detected   | 26851.1  | Detected   | 26764.8  | Detected   | 27101   | Detected   | Mrps24        | 1.106425195 | 1.0926995  | 1.00930688 | 0.996786  |
| A_55_P2016 | 23.5    | Detected   | 18.1     | Not Detect | 18.3     | Not Detect | 26      | Not Detect | Glp1r         | 1.106382979 | 0.7787234  | 1.43646409 | 1.0110497 |
| A_52_P5055 | 1342.8  | Detected   | 1579.9   | Detected   | 1525.7   | Detected   | 1485.6  | Detected   | Nsmce2        | 1.106344951 | 1.13620792 | 0.94031268 | 0.965694  |
| A_66_P1306 | 824.2   | Detected   | 862.7    | Detected   | 793.5    | Detected   | 911.8   | Detected   | Tyms          | 1.106284882 | 0.96275176 | 1.05691434 | 0.9197867 |
| A_55_P1999 | 29333.4 | Detected   | 27416.8  | Detected   | 29793.2  | Detected   | 32450.1 | Detected   | Cox7c         | 1.106250895 | 1.01567496 | 1.18358452 | 1.0866768 |
| A_51_P1513 | 407.6   | Detected   | 371.7    | Detected   | 448.2    | Detected   | 450.9   | Detected   | Zfp444        | 1.1062316   | 1.09960746 | 1.21307506 | 1.2058111 |
| A_55_P2055 | 49708.4 | Detected   | 41474.4  | Detected   | 56454.3  | Detected   | 54984.9 | Detected   | Atp5o         | 1.106149061 | 1.13570946 | 1.32575516 | 1.3611842 |
| A_52_P2427 | 3779.5  | Detected   | 2855.2   | Detected   | 3604.1   | Detected   | 4180.6  | Detected   | Opa1          | 1.106125149 | 0.95359174 | 1.46420566 | 1.2622934 |
| A_55_P2034 | 62.2    | Detected   | 125.8    | Detected   | 75.5     | Detected   | 68.8    | Detected   | Tmem40        | 1.106109325 | 1.21382637 | 0.54689984 | 0.600159  |
| A_55_P1963 | 376.3   | Detected   | 393.8    | Detected   | 410.9    | Detected   | 416.2   | Detected   | 1-Sep         | 1.106032421 | 1.09194791 | 1.05688167 | 1.0434231 |
| A_55_P2017 | 464.1   | Detected   | 456.8    | Detected   | 462.1    | Detected   | 513.3   | Detected   | 1700003F12Rik | 1.106011635 | 0.99569058 | 1.12368651 | 1.0116025 |
| A_55_P2049 | 32.1    | Detected   | 55.5     | Detected   | 17.1     | Not Detect | 35.5    | Not Detect | Ccrl2         | 1.105919003 | 0.53271028 | 0.63963964 | 0.3081081 |
| A_55_P2055 | 8.5     | Not Detect | 55.8     | Detected   | 10.2     | Not Detect | 9.4     | Not Detect | Flt3          | 1.105882353 | 1.2        | 0.16845878 | 0.1827957 |
| A_51_P4044 | 6566.5  | Detected   | 5879.6   | Detected   | 7671.1   | Detected   | 7261    | Detected   | Bckdk         | 1.105764106 | 1.16821747 | 1.23494796 | 1.3046976 |
| A_51_P3474 | 412.3   | Detected   | 427.3    | Detected   | 404.8    | Detected   | 455.9   | Detected   | Utp14a        | 1.105748242 | 0.98180936 | 1.0669319  | 0.9473438 |
| A_55_P1973 | 3875.1  | Detected   | 4277.9   | Detected   | 3608.7   | Detected   | 4284.8  | Detected   | Tada2a        | 1.105726304 | 0.93125339 | 1.00161294 | 0.8435681 |
| A_55_P2416 | 89.9    | Detected   | 86.2     | Detected   | 68.6     | Detected   | 99.4    | Detected   | A130082J08Rik | 1.10567297  | 0.76307008 | 1.15313225 | 0.7958237 |
| A_55_P2049 | 320     | Detected   | 282.1    | Detected   | 315.7    | Detected   | 353.8   | Detected   | Ccdc167       | 1.105625    | 0.9865625  | 1.25416519 | 1.1191067 |
| A_55_P2135 | 89      | Detected   | 91.3     | Detected   | 105.1    | Detected   | 98.4    | Detected   | Sh2d7         | 1.105617978 | 1.18089888 | 1.07776561 | 1.1511501 |
| A_55_P2151 | 4245.3  | Detected   | 3974     | Detected   | 5214.6   | Detected   | 4693.6  | Detected   | Krtap19-4     | 1.105599133 | 1.22832309 | 1.181077   | 1.3121792 |
| A_55_P1968 | 342236  | Detected   | 348503.2 | Detected   | 336299.3 | Detected   | 378375  | Detected   | Ppm1k         | 1.105596723 | 0.9826532  | 1.08571456 | 0.964982  |
| A_51_P2002 | 19.9    | Detected   | 21       | Detected   | 29.4     | Detected   | 22      | Not Detect | Olf945        | 1.105527638 | 1.47738693 | 1.04761905 | 1.4       |
| A_51_P3975 | 8967.3  | Detected   | 8848.9   | Detected   | 8992.4   | Detected   | 9913.3  | Detected   | Snrnp40       | 1.105494407 | 1.00279906 | 1.12028614 | 1.0162167 |
| A_55_P1973 | 27099.7 | Detected   | 28073.6  | Detected   | 24520.4  | Detected   | 29956.9 | Detected   | Srrm1         | 1.105432901 | 0.90482182 | 1.06708438 | 0.8734327 |
| A_51_P4707 | 4300    | Detected   | 4046.3   | Detected   | 5013.5   | Detected   | 4753.3  | Detected   | Eif2s2        | 1.105418605 | 1.16593023 | 1.17472753 | 1.2390332 |
| A_55_P2129 | 6480.9  | Detected   | 7116.8   | Detected   | 9008.2   | Detected   | 7163.8  | Detected   | Zc3hc1        | 1.105371168 | 1.38996127 | 1.00660409 | 1.2657655 |
| A_55_P2021 | 14985.8 | Detected   | 16706.3  | Detected   | 10654.3  | Detected   | 16564   | Detected   | Ugp2          | 1.10531303  | 0.71095971 | 0.99148226 | 0.6377415 |
| A_51_P3703 | 3010.8  | Detected   | 2164.2   | Detected   | 2128.8   | Detected   | 3327.6  | Detected   | Rdh14         | 1.105221204 | 0.7070546  | 1.53756584 | 0.9836429 |
| A_55_P2049 | 6923.6  | Detected   | 5190.7   | Detected   | 6660.8   | Detected   | 7651.9  | Detected   | Fam160a2      | 1.105190941 | 0.96204287 | 1.4741557  | 1.2832181 |
| A_66_P1073 | 54.2    | Detected   | 48.3     | Detected   | 47.1     | Detected   | 59.9    | Detected   | Mdk           | 1.105166052 | 0.86900369 | 1.24016563 | 0.9751553 |
| A_55_P2122 | 124.6   | Detected   | 115.8    | Detected   | 109.3    | Detected   | 137.7   | Detected   | Cir1          | 1.105136437 | 0.87720706 | 1.18911917 | 0.9438687 |
| A_55_P2045 | 32594.7 | Detected   | 39818.5  | Detected   | 32521.4  | Detected   | 36020.7 | Detected   | LOC101055909  | 1.105109113 | 0.99775117 | 0.90462222 | 0.816741  |
| A_55_P1957 | 10078   | Detected   | 8095.3   | Detected   | 10741.8  | Detected   | 11136.5 | Detected   | Rab9          | 1.10503076  | 1.06586624 | 1.37567477 | 1.3269181 |
| A_55_P1988 | 20836.6 | Detected   | 18987.1  | Detected   | 22218.2  | Detected   | 23023.6 | Detected   | Hist4h4       | 1.104959542 | 1.0663064  | 1.21259171 | 1.1701734 |
| A_51_P4417 | 95.3    | Detected   | 86.6     | Detected   | 81.1     | Detected   | 105.3   | Detected   | E130119H09Rik | 1.104931794 | 0.85099685 | 1.21593533 | 0.9364896 |
| A_66_P1068 | 1655.4  | Detected   | 1956.1   | Detected   | 911.8    | Detected   | 1829.1  | Detected   | B3galtl       | 1.104929322 | 0.55080343 | 0.93507489 | 0.4661316 |
| A_55_P2119 | 556.6   | Detected   | 542.5    | Detected   | 450.2    | Detected   | 615     | Detected   | Slc25a44      | 1.104922745 | 0.80883938 | 1.13364055 | 0.8298618 |
| A_55_P2002 | 6250.7  | Detected   | 7226.1   | Detected   | 8527.6   | Detected   | 6906.5  | Detected   | Klc2          | 1.104916249 | 1.3642632  | 0.95577144 | 1.180111  |
| A_51_P3553 | 291.8   | Detected   | 346.7    | Detected   | 157.1    | Detected   | 322.4   | Detected   | Jak3          | 1.104866347 | 0.53838245 | 0.92991059 | 0.4531295 |
| A_55_P2103 | 587.5   | Detected   | 527.4    | Detected   | 521.3    | Detected   | 649.1   | Detected   | Slc27a4       | 1.104851064 | 0.88731915 | 1.23075465 | 0.9884338 |

|            |          |            |          |          |          |            |          |            |               |             |            |            |           |
|------------|----------|------------|----------|----------|----------|------------|----------|------------|---------------|-------------|------------|------------|-----------|
| A_52_P4949 | 1551.8   | Detected   | 1220.2   | Detected | 1198.2   | Detected   | 1714.4   | Detected   | Fnip2         | 1.104781544 | 0.77213558 | 1.40501557 | 0.9819702 |
| A_55_P2021 | 11900.8  | Detected   | 12363.1  | Detected | 12998.8  | Detected   | 13147.7  | Detected   | Wapal         | 1.104774469 | 1.09226271 | 1.06346305 | 1.0514191 |
| A_55_P2019 | 10.5     | Not Detect | 37.5     | Detected | 11.2     | Not Detect | 11.6     | Not Detect | Bspry         | 1.104761905 | 1.06666667 | 0.30933333 | 0.2986667 |
| A_52_P3666 | 534.8    | Detected   | 565.4    | Detected | 643.5    | Detected   | 590.8    | Detected   | Hnrnp3        | 1.104712042 | 1.20325355 | 1.04492395 | 1.1381323 |
| A_55_P2184 | 244.6    | Detected   | 234.7    | Detected | 269.3    | Detected   | 270.2    | Detected   | Gm3161        | 1.10466067  | 1.10098119 | 1.15125692 | 1.1474222 |
| A_52_P1751 | 924      | Detected   | 1423.4   | Detected | 827.1    | Detected   | 1020.7   | Detected   | Mef2a         | 1.10465368  | 0.89512987 | 0.71708585 | 0.5810735 |
| A_55_P2086 | 17.2     | Detected   | 25.9     | Detected | 23.6     | Detected   | 19       | Not Detect | Gm10385       | 1.104651163 | 1.37209302 | 0.73359073 | 0.9111969 |
| A_51_P4624 | 8.6      | Not Detect | 19       | Detected | 30.4     | Detected   | 9.5      | Not Detect | Galnt15       | 1.104651163 | 3.53488372 | 0.5        | 1.6       |
| A_55_P2033 | 7549.3   | Detected   | 7657.9   | Detected | 9228.9   | Detected   | 8339     | Detected   | Fdft1         | 1.104605725 | 1.2224842  | 1.08894083 | 1.2051476 |
| A_51_P1114 | 2149     | Detected   | 2584.7   | Detected | 1658.6   | Detected   | 2373.7   | Detected   | Gfod2         | 1.104560261 | 0.77180084 | 0.91836577 | 0.6416992 |
| A_55_P1961 | 24.9     | Detected   | 53.9     | Detected | 21.5     | Detected   | 27.5     | Not Detect | Nme5          | 1.104417671 | 0.86345382 | 0.51020408 | 0.3988868 |
| A_66_P1109 | 8498.7   | Detected   | 8762.7   | Detected | 8020.3   | Detected   | 9386.1   | Detected   | Ppp1r12a      | 1.10441597  | 0.94370904 | 1.07114246 | 0.9152773 |
| A_55_P2152 | 16.3     | Detected   | 22.2     | Detected | 23       | Detected   | 18       | Not Detect | Sp110         | 1.104294479 | 1.41104294 | 0.81081081 | 1.036036  |
| A_51_P3291 | 2077.1   | Detected   | 2209.7   | Detected | 2186.8   | Detected   | 2293.7   | Detected   | Zc3h10        | 1.104280006 | 1.05281402 | 1.03801421 | 0.9896366 |
| A_52_P3421 | 329.4    | Detected   | 296.4    | Detected | 308.4    | Detected   | 363.7    | Detected   | Nfatc4        | 1.104128719 | 0.93624772 | 1.22705803 | 1.0404858 |
| A_51_P2632 | 928.7    | Detected   | 738      | Detected | 459.5    | Detected   | 1025.4   | Detected   | Dusp8         | 1.104124044 | 0.49477765 | 1.38943089 | 0.6226287 |
| A_55_P2153 | 243.2    | Detected   | 178.7    | Detected | 276.8    | Detected   | 268.5    | Detected   | Slc17a5       | 1.104029605 | 1.13815789 | 1.50251819 | 1.5489647 |
| A_55_P2076 | 96810    | Detected   | 87379.7  | Detected | 84198    | Detected   | 106880.6 | Detected   | Rac1          | 1.104024378 | 0.8697242  | 1.22317426 | 0.9635877 |
| A_55_P1989 | 122.1    | Detected   | 117.5    | Detected | 98.9     | Detected   | 134.8    | Detected   | Gm3952        | 1.104013104 | 0.80999181 | 1.14723404 | 0.8417021 |
| A_55_P2142 | 5785.8   | Detected   | 12206.3  | Detected | 3378.8   | Detected   | 6387.5   | Detected   | Echdc2        | 1.10399599  | 0.58398147 | 0.52329535 | 0.2768079 |
| A_55_P1965 | 4835.9   | Detected   | 4294.6   | Detected | 4522.9   | Detected   | 5338.6   | Detected   | Cks2          | 1.103951695 | 0.93527575 | 1.24309598 | 1.0531598 |
| A_52_P3665 | 2863.2   | Detected   | 3329.7   | Detected | 2570.5   | Detected   | 3160.7   | Detected   | Coq10b        | 1.103904722 | 0.89777172 | 0.94924468 | 0.7719915 |
| A_55_P2168 | 62.6     | Detected   | 69.9     | Detected | 57.1     | Detected   | 69.1     | Detected   | Polr3e        | 1.103833866 | 0.91214058 | 0.98855508 | 0.8168813 |
| A_51_P2690 | 1655.6   | Detected   | 1375.6   | Detected | 1191.6   | Detected   | 1827.5   | Detected   | Habp4         | 1.103829427 | 0.71973907 | 1.3285112  | 0.8662402 |
| A_66_P1351 | 1391.9   | Detected   | 1128.2   | Detected | 1424     | Detected   | 1536.4   | Detected   | Msl2          | 1.103814929 | 1.023062   | 1.36181528 | 1.2621876 |
| A_52_P5858 | 7796.9   | Detected   | 9458.3   | Detected | 9222.8   | Detected   | 8605.1   | Detected   | Bap1          | 1.103656581 | 1.18288038 | 0.90979351 | 0.9751012 |
| A_55_P2176 | 115.8    | Detected   | 99.8     | Detected | 108.5    | Detected   | 127.8    | Detected   | Gm4532        | 1.103626943 | 0.93696028 | 1.28056112 | 1.0871743 |
| A_51_P1187 | 235555.1 | Detected   | 233597   | Detected | 247049.4 | Detected   | 259950.4 | Detected   | Eef1a1        | 1.103565153 | 1.04879665 | 1.11281566 | 1.0575881 |
| A_66_P1244 | 1492     | Detected   | 1157.8   | Detected | 1445.1   | Detected   | 1646.5   | Detected   | 3110002H16Rik | 1.103552279 | 0.96856568 | 1.42209363 | 1.248143  |
| A_52_P1671 | 7888.2   | Detected   | 5944     | Detected | 8714.2   | Detected   | 8704.7   | Detected   | Isca1         | 1.103509039 | 1.10471337 | 1.46445155 | 1.4660498 |
| A_55_P2179 | 3626.9   | Detected   | 3329.1   | Detected | 3678     | Detected   | 4002.2   | Detected   | Man1a2        | 1.103476798 | 1.01408917 | 1.20218678 | 1.1048031 |
| A_55_P2051 | 3898.4   | Detected   | 3056.8   | Detected | 3302.8   | Detected   | 4301.2   | Detected   | Ppfia1        | 1.103324441 | 0.84721937 | 1.40709238 | 1.0804763 |
| A_55_P2119 | 707.5    | Detected   | 609      | Detected | 598.2    | Detected   | 780.6    | Detected   | Sfrs18        | 1.103321555 | 0.84551237 | 1.2817734  | 0.982266  |
| A_55_P2053 | 1547.6   | Detected   | 1827.2   | Detected | 1406.6   | Detected   | 1707.4   | Detected   | Kdm4c         | 1.103256655 | 0.90889119 | 0.9344352  | 0.7698117 |
| A_51_P1640 | 31864.1  | Detected   | 37238.2  | Detected | 24817.1  | Detected   | 35153.3  | Detected   | Cenpe         | 1.103225887 | 0.77884202 | 0.94401179 | 0.666442  |
| A_55_P2063 | 6295     | Detected   | 6885.3   | Detected | 6006.2   | Detected   | 6944.8   | Detected   | Gm5801        | 1.103224782 | 0.95412232 | 1.0086416  | 0.8723222 |
| A_51_P1551 | 34472.7  | Detected   | 31737    | Detected | 27015.8  | Detected   | 38028.7  | Detected   | Cdca8         | 1.10315409  | 0.7836868  | 1.19824495 | 0.8512399 |
| A_51_P4947 | 9615.1   | Detected   | 8637.8   | Detected | 8831     | Detected   | 10605.6  | Detected   | Rcor1         | 1.103015049 | 0.91845119 | 1.22781264 | 1.0223668 |
| A_55_P2018 | 17290.6  | Detected   | 21729.6  | Detected | 17752.5  | Detected   | 19070.2  | Detected   | Zkscan17      | 1.102922975 | 1.02671394 | 0.87761395 | 0.8169732 |
| A_55_P2006 | 310097.2 | Detected   | 335545.3 | Detected | 317894.1 | Detected   | 342012.6 | Detected   | Uba52         | 1.102920633 | 1.02514341 | 1.019274   | 0.9473955 |

|            |          |          |          |            |          |            |          |            |               |             |            |            |           |
|------------|----------|----------|----------|------------|----------|------------|----------|------------|---------------|-------------|------------|------------|-----------|
| A_55_P2107 | 84162.9  | Detected | 79694.8  | Detected   | 93230.3  | Detected   | 92822.8  | Detected   | Gm15421       | 1.102894506 | 1.10773631 | 1.16472844 | 1.1698417 |
| A_51_P2368 | 4945.4   | Detected | 7478.4   | Detected   | 7595.8   | Detected   | 5454     | Detected   | Zswim7        | 1.102843046 | 1.53593238 | 0.72930039 | 1.0156985 |
| A_55_P2133 | 128.4    | Detected | 153.2    | Detected   | 139.2    | Detected   | 141.6    | Detected   | LOC101055842  | 1.102803738 | 1.08411215 | 0.92428198 | 0.9086162 |
| A_52_P5464 | 245.2    | Detected | 234.8    | Detected   | 187.1    | Detected   | 270.4    | Detected   | Ube2d1        | 1.102773246 | 0.76305057 | 1.1516184  | 0.7968484 |
| A_52_P2489 | 334.8    | Detected | 258      | Detected   | 313.4    | Detected   | 369.2    | Detected   | Ubp1          | 1.102747909 | 0.93608124 | 1.43100775 | 1.2147287 |
| A_55_P1981 | 29051.2  | Detected | 23458.9  | Detected   | 27491.8  | Detected   | 32034.8  | Detected   | Gsk3a         | 1.102701437 | 0.94632236 | 1.36557128 | 1.1719134 |
| A_52_P4854 | 543.8    | Detected | 645      | Detected   | 445.7    | Detected   | 599.6    | Detected   | Rnf41         | 1.102611254 | 0.8196028  | 0.9296124  | 0.6910078 |
| A_51_P2340 | 16937.4  | Detected | 13568.3  | Detected   | 16695.2  | Detected   | 18675.3  | Detected   | Rbm5          | 1.102607248 | 0.98570028 | 1.37639203 | 1.2304563 |
| A_55_P2052 | 9941.5   | Detected | 10557.8  | Detected   | 8789.2   | Detected   | 10961.3  | Detected   | Setd5         | 1.102580094 | 0.88409194 | 1.03821819 | 0.832484  |
| A_52_P1349 | 1477     | Detected | 1449.3   | Detected   | 1705.9   | Detected   | 1628.5   | Detected   | Wdr20         | 1.102572783 | 1.1549763  | 1.1236459  | 1.177051  |
| A_55_P1981 | 5734.8   | Detected | 5560.1   | Detected   | 5412.1   | Detected   | 6322.5   | Detected   | Ddx6          | 1.102479598 | 0.94372951 | 1.13711984 | 0.9733818 |
| A_55_P1980 | 1155.2   | Detected | 1051.5   | Detected   | 1066     | Detected   | 1273.5   | Detected   | Aurkb         | 1.10240651  | 0.92278393 | 1.21112696 | 1.0137898 |
| A_55_P2324 | 213.9    | Detected | 190.5    | Detected   | 197      | Detected   | 235.8    | Detected   | Dmrt1         | 1.102384292 | 0.92099112 | 1.23779528 | 1.0341207 |
| A_51_P3115 | 319371.9 | Detected | 333772.8 | Detected   | 352907.4 | Detected   | 352046.7 | Detected   | Cox6a1        | 1.102309564 | 1.10500454 | 1.05474952 | 1.0573282 |
| A_51_P4590 | 2343.9   | Detected | 2303.8   | Detected   | 2384     | Detected   | 2583.7   | Detected   | Aplf          | 1.102308119 | 1.01710824 | 1.12149492 | 1.034812  |
| A_55_P2118 | 22.5     | Detected | 25.5     | Detected   | 18.6     | Detected   | 24.8     | Not Detect | Lasp1         | 1.102222222 | 0.82666667 | 0.97254902 | 0.7294118 |
| A_52_P5904 | 1278.7   | Detected | 1383.4   | Detected   | 1302.5   | Detected   | 1409.4   | Detected   | Ccnl1         | 1.102213185 | 1.01861265 | 1.01879427 | 0.9415209 |
| A_55_P2106 | 18.6     | Detected | 15.7     | Not Detect | 13.4     | Not Detect | 20.5     | Not Detect | Bglap         | 1.102150538 | 0.72043011 | 1.30573248 | 0.8535032 |
| A_51_P1723 | 13085.5  | Detected | 9635.3   | Detected   | 9833.6   | Detected   | 14422    | Detected   | Pak2          | 1.102135952 | 0.75148829 | 1.49678785 | 1.0205806 |
| A_52_P6215 | 6327.5   | Detected | 6514     | Detected   | 6647.3   | Detected   | 6973.6   | Detected   | Tcf20         | 1.102109838 | 1.05054129 | 1.07055573 | 1.0204636 |
| A_55_P2014 | 33.3     | Detected | 33.5     | Detected   | 46.1     | Detected   | 36.7     | Not Detect | Atp5j         | 1.102102102 | 1.38438438 | 1.09552239 | 1.3761194 |
| A_55_P2063 | 551.8    | Detected | 589.7    | Detected   | 568.8    | Detected   | 608.1    | Detected   | Gm13271       | 1.102029721 | 1.03080826 | 1.03120231 | 0.9645582 |
| A_51_P4582 | 4125.9   | Detected | 2742.5   | Detected   | 3626.8   | Detected   | 4546.7   | Detected   | Wdr13         | 1.101989869 | 0.87903245 | 1.65786691 | 1.322443  |
| A_55_P2007 | 4893.6   | Detected | 5436.6   | Detected   | 5199.8   | Detected   | 5392.3   | Detected   | Smu1          | 1.101908615 | 1.06257152 | 0.99185152 | 0.9564434 |
| A_66_P1374 | 3570.2   | Detected | 3226.7   | Detected   | 3438.7   | Detected   | 3933.6   | Detected   | Btaf1         | 1.101787015 | 0.96316733 | 1.21907832 | 1.0657018 |
| A_55_P2060 | 240.7    | Detected | 243.4    | Detected   | 216.8    | Detected   | 265.2    | Detected   | Rabep1        | 1.101786456 | 0.90070627 | 1.0895645  | 0.8907149 |
| A_55_P2102 | 90.4     | Detected | 97.4     | Detected   | 84.3     | Detected   | 99.6     | Detected   | Lztf1         | 1.101769912 | 0.93252212 | 1.02258727 | 0.8655031 |
| A_55_P2099 | 19.7     | Detected | 24.3     | Detected   | 22.4     | Detected   | 21.7     | Not Detect | Vmn2r85       | 1.101522843 | 1.13705584 | 0.89300412 | 0.9218107 |
| A_51_P4569 | 3918.4   | Detected | 3275.7   | Detected   | 3973.5   | Detected   | 4316.2   | Detected   | Pex11a        | 1.101521029 | 1.01406186 | 1.31764203 | 1.2130232 |
| A_55_P2069 | 144.8    | Detected | 128.4    | Detected   | 89.2     | Detected   | 159.5    | Detected   | Plp1          | 1.101519337 | 0.6160221  | 1.24221184 | 0.694704  |
| A_55_P1979 | 93.6     | Detected | 98.3     | Detected   | 94.4     | Detected   | 103.1    | Detected   | Cep192        | 1.101495726 | 1.00854701 | 1.04883011 | 0.9603255 |
| A_51_P2237 | 431.6    | Detected | 440.7    | Detected   | 299.5    | Detected   | 475.4    | Detected   | Nr1d1         | 1.101482854 | 0.69392956 | 1.07873837 | 0.6796006 |
| A_55_P2423 | 69       | Detected | 78.5     | Detected   | 41.9     | Detected   | 76       | Detected   | 2900057C01Rik | 1.101449275 | 0.60724638 | 0.96815287 | 0.533758  |
| A_66_P1326 | 27.6     | Detected | 32.5     | Detected   | 31.4     | Detected   | 30.4     | Not Detect | 1700015F17Rik | 1.101449275 | 1.13768116 | 0.93538462 | 0.9661538 |
| A_55_P2247 | 133.1    | Detected | 126.6    | Detected   | 172.4    | Detected   | 146.6    | Detected   | Rab26os       | 1.101427498 | 1.29526672 | 1.15797788 | 1.3617694 |
| A_55_P2428 | 730.2    | Detected | 694      | Detected   | 926.9    | Detected   | 804.2    | Detected   | Lrrc2         | 1.101342098 | 1.26937825 | 1.15878963 | 1.3355908 |
| A_55_P2002 | 233852.8 | Detected | 251446.8 | Detected   | 233067.3 | Detected   | 257547.6 | Detected   | Gm9234        | 1.101323568 | 0.99664105 | 1.02426279 | 0.926905  |
| A_55_P2164 | 17903.8  | Detected | 15017.9  | Detected   | 15314.6  | Detected   | 19717.7  | Detected   | Ptdss1        | 1.101313688 | 0.85538266 | 1.31294655 | 1.0197564 |
| A_55_P2060 | 281817.7 | Detected | 283050.3 | Detected   | 268687.9 | Detected   | 310360.9 | Detected   | Apopt1        | 1.101282496 | 0.95341031 | 1.09648674 | 0.9492585 |
| A_52_P2990 | 265.6    | Detected | 291.2    | Detected   | 190.4    | Detected   | 292.5    | Detected   | Ptplb         | 1.10128012  | 0.71686747 | 1.00446429 | 0.6538462 |

|            |         |          |         |          |         |          |         |          |               |             |            |            |           |
|------------|---------|----------|---------|----------|---------|----------|---------|----------|---------------|-------------|------------|------------|-----------|
| A_51_P4723 | 1812.3  | Detected | 2870.2  | Detected | 918.6   | Detected | 1995.6  | Detected | Tldc1         | 1.101142195 | 0.50686972 | 0.69528256 | 0.3200474 |
| A_52_P1092 | 186.2   | Detected | 149.1   | Detected | 112.5   | Detected | 205     | Detected | LOC101056333  | 1.100966702 | 0.60418904 | 1.37491616 | 0.7545272 |
| A_52_P2563 | 298.2   | Detected | 372.9   | Detected | 378.1   | Detected | 328.3   | Detected | Rnf146        | 1.100938967 | 1.26794098 | 0.88039689 | 1.0139448 |
| A_51_P1619 | 626.7   | Detected | 602.3   | Detected | 529.1   | Detected | 689.9   | Detected | Tspo2         | 1.1008457   | 0.8442636  | 1.14544247 | 0.8784659 |
| A_55_P1972 | 5311.6  | Detected | 5211.8  | Detected | 4937.8  | Detected | 5846.9  | Detected | 0610037L13Rik | 1.100779426 | 0.92962572 | 1.12185809 | 0.947427  |
| A_66_P1372 | 5592.1  | Detected | 4106.4  | Detected | 5453.5  | Detected | 6155.5  | Detected | Elane         | 1.100749271 | 0.97521504 | 1.49900156 | 1.3280489 |
| A_52_P3461 | 1550.4  | Detected | 1153.8  | Detected | 1763.7  | Detected | 1706.6  | Detected | Foxn2         | 1.100748194 | 1.1375774  | 1.4791125  | 1.5286011 |
| A_51_P5076 | 949.8   | Detected | 805     | Detected | 963.8   | Detected | 1045.4  | Detected | Itpkc         | 1.100652769 | 1.01473995 | 1.29863354 | 1.1972671 |
| A_55_P1975 | 10519.3 | Detected | 14448.2 | Detected | 11413.4 | Detected | 11577.8 | Detected | Nol11         | 1.100624566 | 1.08499615 | 0.80133165 | 0.7899531 |
| A_55_P1952 | 40766.2 | Detected | 28118.5 | Detected | 30105.3 | Detected | 44867.1 | Detected | Cic           | 1.100595591 | 0.73848679 | 1.59564344 | 1.0706581 |
| A_55_P2107 | 51909.9 | Detected | 53513   | Detected | 55692.4 | Detected | 57127.2 | Detected | Aurkaip1      | 1.10050684  | 1.07286664 | 1.06753873 | 1.0407266 |
| A_55_P2022 | 8430.5  | Detected | 7465.1  | Detected | 7734.3  | Detected | 9277.8  | Detected | Klf10         | 1.100504122 | 0.9174189  | 1.24282327 | 1.0360611 |
| A_52_P5597 | 59.7    | Detected | 52.9    | Detected | 49.8    | Detected | 65.7    | Detected | Hist1h2bq     | 1.100502513 | 0.83417085 | 1.24196597 | 0.9413989 |
| A_55_P2017 | 78409.7 | Detected | 79181.4 | Detected | 85378.2 | Detected | 86289.6 | Detected | Cox5b         | 1.100496495 | 1.08887293 | 1.08977108 | 1.0782608 |
| A_55_P2006 | 82368.8 | Detected | 65031.6 | Detected | 123316  | Detected | 90640.8 | Detected | Rbp4          | 1.100426375 | 1.49712027 | 1.39379625 | 1.8962474 |
| A_55_P1954 | 63903.6 | Detected | 61700.4 | Detected | 82448.1 | Detected | 70321   | Detected | Snrpd2        | 1.100423137 | 1.29019492 | 1.13971708 | 1.3362652 |
| A_55_P2064 | 1367.9  | Detected | 1298.8  | Detected | 1127.8  | Detected | 1505.2  | Detected | Cnot6         | 1.100372834 | 0.82447547 | 1.15891592 | 0.86834   |
| A_55_P1993 | 12664.9 | Detected | 13091.8 | Detected | 9551.6  | Detected | 13935.4 | Detected | Kdm1a         | 1.100316623 | 0.75417887 | 1.06443728 | 0.7295865 |
| A_55_P2055 | 68.8    | Detected | 79.3    | Detected | 83.5    | Detected | 75.7    | Detected | 4930547M16Rik | 1.100290698 | 1.21366279 | 0.95460277 | 1.0529634 |
| A_55_P2046 | 82029   | Detected | 66064   | Detected | 81597.8 | Detected | 90252.9 | Detected | Eif4g1        | 1.100256007 | 0.99474332 | 1.36614344 | 1.2351326 |
| A_52_P3762 | 2663.3  | Detected | 1636.1  | Detected | 2258.9  | Detected | 2930.3  | Detected | Cstf3         | 1.100251568 | 0.8481583  | 1.79102744 | 1.3806613 |
| A_55_P1956 | 117.8   | Detected | 121     | Detected | 211.7   | Detected | 129.6   | Detected | Gm8909        | 1.100169779 | 1.79711375 | 1.07107438 | 1.7495868 |
| A_55_P2436 | 36216.8 | Detected | 24993.6 | Detected | 31447.7 | Detected | 39841.8 | Detected | Paics         | 1.10009167  | 0.86831802 | 1.59408008 | 1.2582301 |
| A_55_P2008 | 58084.2 | Detected | 53531.2 | Detected | 62457.5 | Detected | 63897.8 | Detected | Gm4910        | 1.100089181 | 1.07529242 | 1.19365529 | 1.1667495 |
| A_52_P2274 | 2466.2  | Detected | 2638.8  | Detected | 2969.7  | Detected | 2713    | Detected | Parp2         | 1.100072987 | 1.20416025 | 1.02811884 | 1.1253979 |
| A_55_P2028 | 18564.2 | Detected | 20016.2 | Detected | 17131.4 | Detected | 20420.7 | Detected | Ube2j2        | 1.100004309 | 0.92281919 | 1.02020863 | 0.8558767 |
| A_52_P3543 | 56      | Detected | 54.7    | Detected | 56.8    | Detected | 61.6    | Detected | Snrpn         | 1.1         | 1.01428571 | 1.1261426  | 1.0383912 |
| A_51_P1194 | 1844.1  | Detected | 1288    | Detected | 1519.9  | Detected | 2028.3  | Detected | Tug1          | 1.099886123 | 0.82419608 | 1.57476708 | 1.1800466 |
| A_51_P4306 | 16717.2 | Detected | 12466.1 | Detected | 15053.5 | Detected | 18385.9 | Detected | Slc25a12      | 1.099819348 | 0.90047975 | 1.47487185 | 1.2075549 |
| A_55_P2117 | 5090.3  | Detected | 4839.6  | Detected | 5081.2  | Detected | 5598.4  | Detected | Mtmr3         | 1.0998173   | 0.99821229 | 1.15678982 | 1.0499215 |
| A_55_P2031 | 446.9   | Detected | 368.8   | Detected | 412.2   | Detected | 491.5   | Detected | Fbxo39        | 1.099798613 | 0.92235399 | 1.33270065 | 1.117679  |
| A_55_P2140 | 145.3   | Detected | 143.2   | Detected | 116.4   | Detected | 159.8   | Detected | Nhlh1         | 1.099793531 | 0.80110117 | 1.11592179 | 0.8128492 |
| A_55_P2052 | 10443.3 | Detected | 6345    | Detected | 8725.9  | Detected | 11485.3 | Detected | Xiap          | 1.09977689  | 0.83555007 | 1.81013396 | 1.3752403 |
| A_55_P2051 | 1591.7  | Detected | 1378.3  | Detected | 1837.3  | Detected | 1750.5  | Detected | Gm11937       | 1.099767544 | 1.15430043 | 1.27004281 | 1.3330189 |
| A_55_P2003 | 9069.6  | Detected | 9867.3  | Detected | 7852.4  | Detected | 9974.1  | Detected | Rybp          | 1.099728764 | 0.86579342 | 1.01082363 | 0.7958003 |
| A_55_P1977 | 2094.1  | Detected | 2089.2  | Detected | 2515.4  | Detected | 2302.9  | Detected | 4932422M17Rik | 1.099708705 | 1.20118428 | 1.10228796 | 1.2040015 |
| A_52_P1752 | 11596.6 | Detected | 5375.9  | Detected | 9263.7  | Detected | 12752.7 | Detected | Irs1          | 1.099693013 | 0.79882897 | 2.37219814 | 1.7231905 |
| A_55_P2002 | 58.2    | Detected | 48.9    | Detected | 55.7    | Detected | 64      | Detected | Mrgprb4       | 1.099656357 | 0.95704467 | 1.30879346 | 1.1390593 |
| A_52_P3761 | 28548.8 | Detected | 24771.7 | Detected | 34414.6 | Detected | 31391.7 | Detected | Mknk2         | 1.099580368 | 1.20546573 | 1.26724044 | 1.3892708 |
| A_51_P2958 | 3853    | Detected | 3772.5  | Detected | 4636.7  | Detected | 4236.2  | Detected | Cep192        | 1.09945497  | 1.20339995 | 1.12291584 | 1.2290789 |

|            |          |            |          |          |          |            |          |            |               |             |            |            |           |
|------------|----------|------------|----------|----------|----------|------------|----------|------------|---------------|-------------|------------|------------|-----------|
| A_51_P1050 | 722.7    | Detected   | 899.3    | Detected | 900      | Detected   | 794.5    | Detected   | Rad52         | 1.099349661 | 1.24533001 | 0.88346492 | 1.0007784 |
| A_55_P2122 | 770.2    | Detected   | 460.3    | Detected | 1629.9   | Detected   | 846.7    | Detected   | Zfp185        | 1.099324851 | 2.11620358 | 1.83945253 | 3.5409516 |
| A_55_P2022 | 2341.4   | Detected   | 1610.1   | Detected | 2143.8   | Detected   | 2573.9   | Detected   | LOC100045191  | 1.099299564 | 0.91560605 | 1.59859636 | 1.3314701 |
| A_55_P2028 | 1088.2   | Detected   | 1162.2   | Detected | 1097.3   | Detected   | 1196.2   | Detected   | Ppm1d         | 1.099246462 | 1.00836243 | 1.02925486 | 0.9441576 |
| A_55_P1978 | 3953.6   | Detected   | 4526.8   | Detected | 3818.9   | Detected   | 4345.5   | Detected   | Trit1         | 1.099124848 | 0.96592979 | 0.95994963 | 0.8436202 |
| A_52_P2429 | 25211.2  | Detected   | 22887.9  | Detected | 28805.3  | Detected   | 27710    | Detected   | Sec11a        | 1.099114679 | 1.14255966 | 1.21068337 | 1.2585384 |
| A_55_P1955 | 273042   | Detected   | 332900.3 | Detected | 319325.9 | Detected   | 300103.1 | Detected   | Rps12-ps18    | 1.099109661 | 1.16951202 | 0.90148041 | 0.9592238 |
| A_55_P2093 | 88.8     | Detected   | 90.3     | Detected | 92       | Detected   | 97.6     | Detected   | Pon2          | 1.099099099 | 1.03603604 | 1.08084164 | 1.0188261 |
| A_55_P2040 | 14079.6  | Detected   | 14488.8  | Detected | 10583.6  | Detected   | 15473.9  | Detected   | Cnn3          | 1.099029802 | 0.75169749 | 1.06799045 | 0.7304677 |
| A_51_P4703 | 118660.9 | Detected   | 111247   | Detected | 64567.8  | Detected   | 130411.2 | Detected   | Sepp1         | 1.099024194 | 0.54413712 | 1.17226712 | 0.5804004 |
| A_52_P5073 | 694.8    | Detected   | 658.3    | Detected | 732.1    | Detected   | 763.6    | Detected   | Gstcd         | 1.099021301 | 1.05368451 | 1.15995747 | 1.1121069 |
| A_66_P1210 | 203.1    | Detected   | 231.3    | Detected | 262.2    | Detected   | 223.2    | Detected   | Spata24       | 1.098966027 | 1.29098966 | 0.96498054 | 1.1335927 |
| A_55_P2180 | 128.4    | Detected   | 131.6    | Detected | 155.1    | Detected   | 141.1    | Detected   | Clstn3        | 1.098909657 | 1.20794393 | 1.07218845 | 1.1785714 |
| A_55_P2091 | 9.1      | Not Detect | 19.4     | Detected | 8.4      | Not Detect | 10       | Not Detect | Olfir871      | 1.098901099 | 0.92307692 | 0.51546392 | 0.4329897 |
| A_55_P2163 | 204915.1 | Detected   | 226228.4 | Detected | 243258.7 | Detected   | 225174.4 | Detected   | Rps27         | 1.098866799 | 1.18711945 | 0.99534099 | 1.0752792 |
| A_52_P5047 | 714.5    | Detected   | 601.4    | Detected | 695.7    | Detected   | 785.1    | Detected   | Cdyl          | 1.098810357 | 0.97368789 | 1.30545394 | 1.1568008 |
| A_52_P8805 | 58.7     | Detected   | 55.7     | Detected | 53       | Detected   | 64.5     | Detected   | Chrm4         | 1.098807496 | 0.90289608 | 1.15798923 | 0.951526  |
| A_55_P2094 | 5149.4   | Detected   | 4443.3   | Detected | 6518.3   | Detected   | 5658.1   | Detected   | Erp27         | 1.098788208 | 1.2658368  | 1.2734004  | 1.4669953 |
| A_55_P2357 | 40.5     | Detected   | 33.1     | Detected | 27.6     | Detected   | 44.5     | Not Detect | B930042K01Rik | 1.098765432 | 0.68148148 | 1.34441088 | 0.8338369 |
| A_55_P2156 | 31.4     | Detected   | 24.3     | Detected | 17.8     | Detected   | 34.5     | Not Detect | BB014433      | 1.098726115 | 0.56687898 | 1.41975309 | 0.7325103 |
| A_55_P1953 | 2253.1   | Detected   | 2452.9   | Detected | 3643.2   | Detected   | 2475.5   | Detected   | Mettl18       | 1.098708446 | 1.61697217 | 1.00921358 | 1.4852623 |
| A_55_P2013 | 4484.5   | Detected   | 5198.7   | Detected | 4924.8   | Detected   | 4927     | Detected   | Ddx31         | 1.098673208 | 1.09818263 | 0.94773693 | 0.9473138 |
| A_55_P2146 | 11203    | Detected   | 12522.9  | Detected | 9675.9   | Detected   | 12308.3  | Detected   | Dennd5b       | 1.098661073 | 0.8636883  | 0.98286339 | 0.7726565 |
| A_55_P1998 | 282.9    | Detected   | 278.4    | Detected | 201.7    | Detected   | 310.8    | Detected   | Prim2         | 1.098621421 | 0.71297278 | 1.11637931 | 0.7244971 |
| A_55_P2040 | 43299.9  | Detected   | 38989.7  | Detected | 44574.4  | Detected   | 47567    | Detected   | Cdv3          | 1.098547572 | 1.02943425 | 1.21998887 | 1.1432353 |
| A_52_P2665 | 7932.3   | Detected   | 5698     | Detected | 7726     | Detected   | 8713.8   | Detected   | Ide           | 1.098521236 | 0.97399241 | 1.52927343 | 1.3559144 |
| A_52_P2713 | 1007.3   | Detected   | 1098.1   | Detected | 1030.6   | Detected   | 1106.5   | Detected   | Efr3a         | 1.098481088 | 1.02313114 | 1.00764958 | 0.9385302 |
| A_55_P2112 | 79478.6  | Detected   | 55751    | Detected | 68288.1  | Detected   | 87305.4  | Detected   | Tnk2          | 1.098476823 | 0.85920109 | 1.56598805 | 1.2248767 |
| A_55_P1963 | 4380     | Detected   | 3965.1   | Detected | 4362.1   | Detected   | 4811.2   | Detected   | Upf3b         | 1.098447489 | 0.99591324 | 1.2133868  | 1.1001236 |
| A_52_P3561 | 1112.4   | Detected   | 1106.3   | Detected | 995      | Detected   | 1221.9   | Detected   | Hus1          | 1.098435814 | 0.89446242 | 1.10449245 | 0.8993944 |
| A_55_P2133 | 33508.5  | Detected   | 28592.4  | Detected | 40257    | Detected   | 36802.9  | Detected   | Mad211        | 1.098315353 | 1.20139666 | 1.28715673 | 1.4079616 |
| A_55_P1968 | 33539.4  | Detected   | 40815    | Detected | 42951.2  | Detected   | 36836    | Detected   | Tomm22        | 1.098290369 | 1.28061921 | 0.90251133 | 1.0523386 |
| A_55_P2038 | 439.6    | Detected   | 300.3    | Detected | 400.8    | Detected   | 482.8    | Detected   | Pddc1         | 1.098271156 | 0.91173794 | 1.60772561 | 1.3346653 |
| A_51_P3546 | 26264.3  | Detected   | 19934.8  | Detected | 18164.3  | Detected   | 28844.7  | Detected   | Dync1h1       | 1.098247431 | 0.69159658 | 1.44695206 | 0.9111855 |
| A_52_P2087 | 1332.6   | Detected   | 1313.1   | Detected | 1092.5   | Detected   | 1463.5   | Detected   | Zmym4         | 1.098229026 | 0.8198259  | 1.11453812 | 0.8320006 |
| A_55_P2026 | 178.2    | Detected   | 155.8    | Detected | 177.4    | Detected   | 195.7    | Detected   | Gm11564       | 1.098204265 | 0.99551066 | 1.25609756 | 1.1386393 |
| A_55_P2155 | 695.7    | Detected   | 801.8    | Detected | 734.8    | Detected   | 764      | Detected   | Pvt1          | 1.098174501 | 1.05620239 | 0.95285607 | 0.916438  |
| A_55_P1989 | 6880.4   | Detected   | 6285.8   | Detected | 6199.2   | Detected   | 7555.8   | Detected   | Thrap3        | 1.098162898 | 0.90099413 | 1.2020427  | 0.9862229 |
| A_55_P1997 | 200.7    | Detected   | 162.8    | Detected | 174.1    | Detected   | 220.4    | Detected   | Exoc6b        | 1.098156452 | 0.86746388 | 1.35380835 | 1.0694103 |
| A_52_P9255 | 1007.2   | Detected   | 781.9    | Detected | 1065.6   | Detected   | 1106     | Detected   | Kdm2a         | 1.098093725 | 1.05798253 | 1.41450313 | 1.3628341 |

|            |          |            |          |            |          |          |          |            |               |             |            |            |           |
|------------|----------|------------|----------|------------|----------|----------|----------|------------|---------------|-------------|------------|------------|-----------|
| A_52_P2037 | 319.1    | Detected   | 79.5     | Detected   | 251.7    | Detected | 350.4    | Detected   | Mras          | 1.098088374 | 0.78878095 | 4.40754717 | 3.1660377 |
| A_55_P2166 | 91537.5  | Detected   | 73294.1  | Detected   | 102251.5 | Detected | 100514.1 | Detected   | Pitpna        | 1.098064728 | 1.11704493 | 1.37138051 | 1.395085  |
| A_55_P2192 | 1611.3   | Detected   | 1233     | Detected   | 859.7    | Detected | 1769.3   | Detected   | 5830469G19Rik | 1.098057469 | 0.53354434 | 1.43495539 | 0.6972425 |
| A_51_P1407 | 490.6    | Detected   | 410.6    | Detected   | 523.2    | Detected | 538.7    | Detected   | Dcaf6         | 1.098043212 | 1.06644925 | 1.31198246 | 1.2742328 |
| A_55_P2047 | 1352.5   | Detected   | 722.6    | Detected   | 967.8    | Detected | 1485.1   | Detected   | Cutal         | 1.098040665 | 0.71556377 | 2.05521727 | 1.3393302 |
| A_66_P1172 | 768.2    | Detected   | 670.1    | Detected   | 681.4    | Detected | 843.5    | Detected   | Cdk13         | 1.098021349 | 0.88700859 | 1.25876735 | 1.0168632 |
| A_55_P2002 | 224.5    | Detected   | 234.7    | Detected   | 270.7    | Detected | 246.5    | Detected   | Zfp707        | 1.097995546 | 1.20579065 | 1.05027695 | 1.1533873 |
| A_55_P2291 | 164.3    | Detected   | 144.9    | Detected   | 128.7    | Detected | 180.4    | Detected   | 4833447P13Rik | 1.097991479 | 0.78332319 | 1.24499655 | 0.8881988 |
| A_52_P3761 | 2932.7   | Detected   | 2345.5   | Detected   | 2346.3   | Detected | 3220     | Detected   | Slc30a9       | 1.097964333 | 0.80004774 | 1.37284161 | 1.0003411 |
| A_51_P2258 | 4993.3   | Detected   | 5587.2   | Detected   | 5178.6   | Detected | 5482.2   | Detected   | 2700097O09Rik | 1.097911201 | 1.03710973 | 0.98120704 | 0.9268686 |
| A_51_P3205 | 9029.1   | Detected   | 11284.3  | Detected   | 10945.5  | Detected | 9912.5   | Detected   | Fam105b       | 1.097839209 | 1.21224707 | 0.87843287 | 0.969976  |
| A_51_P2946 | 1672     | Detected   | 1481.4   | Detected   | 1013.2   | Detected | 1835.4   | Detected   | Cdr2          | 1.097727273 | 0.60598086 | 1.23896314 | 0.6839476 |
| A_55_P2205 | 297      | Detected   | 300.9    | Detected   | 346.2    | Detected | 326      | Detected   | Aamdc         | 1.097643098 | 1.16565657 | 1.08341642 | 1.1505484 |
| A_66_P1004 | 5185.1   | Detected   | 4771.1   | Detected   | 5443.4   | Detected | 5690.7   | Detected   | Vezf1         | 1.097510173 | 1.04981582 | 1.19274381 | 1.1409109 |
| A_52_P7951 | 224.6    | Detected   | 281.1    | Detected   | 290.3    | Detected | 246.5    | Detected   | Zfp84         | 1.097506679 | 1.29252004 | 0.87691213 | 1.0327286 |
| A_55_P1960 | 1458.2   | Detected   | 1019.9   | Detected   | 1319.7   | Detected | 1600.3   | Detected   | Arl13b        | 1.09744891  | 0.90501989 | 1.5690754  | 1.2939504 |
| A_51_P1276 | 27596.8  | Detected   | 20806.8  | Detected   | 25889.8  | Detected | 30286    | Detected   | Clic4         | 1.097446081 | 0.938145   | 1.45558183 | 1.2442951 |
| A_55_P2165 | 418.7    | Detected   | 296.9    | Detected   | 362.9    | Detected | 459.5    | Detected   | Ncor1         | 1.097444471 | 0.86673036 | 1.54765914 | 1.2222971 |
| A_55_P2004 | 242.2    | Detected   | 196.5    | Detected   | 232.2    | Detected | 265.8    | Detected   | Nupl2         | 1.097440132 | 0.95871181 | 1.35267176 | 1.1816794 |
| A_55_P2076 | 1481.6   | Detected   | 1570.1   | Detected   | 1949.3   | Detected | 1625.9   | Detected   | Defa-rs10     | 1.097394708 | 1.31567225 | 1.03553914 | 1.2415133 |
| A_55_P2121 | 45.2     | Detected   | 34.4     | Detected   | 38.1     | Detected | 49.6     | Not Detect | Gm10751       | 1.097345133 | 0.84292035 | 1.44186047 | 1.1075581 |
| A_55_P2165 | 75       | Detected   | 68.7     | Detected   | 75.3     | Detected | 82.3     | Detected   | Gmfg          | 1.097333333 | 1.004      | 1.19796215 | 1.0960699 |
| A_51_P1652 | 637      | Detected   | 776.2    | Detected   | 530.2    | Detected | 699      | Detected   | Snx16         | 1.09733124  | 0.83233909 | 0.9005411  | 0.6830714 |
| A_55_P2170 | 12754    | Detected   | 11011.9  | Detected   | 13113.7  | Detected | 13994.9  | Detected   | Bmi1          | 1.097294966 | 1.02820292 | 1.27088877 | 1.1908662 |
| A_55_P2030 | 822.4    | Detected   | 891.4    | Detected   | 679.5    | Detected | 902.2    | Detected   | LOC101056094  | 1.097033074 | 0.82624027 | 1.01211577 | 0.762284  |
| A_55_P2139 | 125.9    | Detected   | 216      | Detected   | 151.2    | Detected | 138.1    | Detected   | A730020M07Rik | 1.096902303 | 1.20095314 | 0.63935185 | 0.7       |
| A_66_P1380 | 349.1    | Detected   | 295.4    | Detected   | 315.2    | Detected | 382.9    | Detected   | Gm4710        | 1.096820395 | 0.90289315 | 1.29620853 | 1.0670278 |
| A_55_P2010 | 49.6     | Detected   | 41.5     | Detected   | 43.8     | Detected | 54.4     | Detected   | Grm4          | 1.096774194 | 0.88306452 | 1.31084337 | 1.0554217 |
| A_52_P4943 | 2815.7   | Detected   | 2271.5   | Detected   | 2654.6   | Detected | 3088.1   | Detected   | Dgkq          | 1.096743261 | 0.9427851  | 1.35949813 | 1.1686551 |
| A_55_P2108 | 30994.6  | Detected   | 27348.1  | Detected   | 44357.5  | Detected | 33991.7  | Detected   | Glud1         | 1.096697489 | 1.43113639 | 1.2429273  | 1.6219591 |
| A_52_P6136 | 177.9    | Detected   | 155.3    | Detected   | 157.7    | Detected | 195.1    | Detected   | Tmem41b       | 1.09668353  | 0.88645306 | 1.25627817 | 1.015454  |
| A_55_P1967 | 1155.4   | Detected   | 964.8    | Detected   | 1129.3   | Detected | 1267.1   | Detected   | Fgfr1         | 1.096676476 | 0.97741042 | 1.31332919 | 1.1705017 |
| A_52_P1173 | 86.9     | Detected   | 116.1    | Detected   | 74.1     | Detected | 95.3     | Detected   | Azin1         | 1.096662831 | 0.85270426 | 0.8208441  | 0.6382429 |
| A_51_P1553 | 144913.1 | Detected   | 115191.4 | Detected   | 207337.4 | Detected | 158915.1 | Detected   | Gsto1         | 1.096623425 | 1.43077058 | 1.37957434 | 1.7999382 |
| A_55_P2042 | 37.3     | Detected   | 35.6     | Detected   | 51.5     | Detected | 40.9     | Not Detect | Cyp2d40       | 1.096514745 | 1.38069705 | 1.1488764  | 1.4466292 |
| A_55_P2431 | 45.6     | Detected   | 43.4     | Detected   | 57.3     | Detected | 50       | Not Detect | Thap6         | 1.096491228 | 1.25657895 | 1.15207373 | 1.3202765 |
| A_52_P5622 | 11.4     | Not Detect | 19.9     | Detected   | 15.9     | Detected | 12.5     | Not Detect | 9130409123Rik | 1.096491228 | 1.39473684 | 0.6281407  | 0.798995  |
| A_52_P4265 | 4397.9   | Detected   | 3382.5   | Detected   | 4093.8   | Detected | 4822.1   | Detected   | Sh3bgrl       | 1.096455126 | 0.93085336 | 1.42560237 | 1.2102882 |
| A_52_P4318 | 8568.2   | Detected   | 5711     | Detected   | 6580.5   | Detected | 9394.3   | Detected   | 201011101Rik  | 1.09641465  | 0.76801429 | 1.64494835 | 1.15225   |
| A_51_P4568 | 8.3      | Not Detect | 8.2      | Not Detect | 16.2     | Detected | 9.1      | Not Detect | Slc19a3       | 1.096385542 | 1.95180723 | 1.1097561  | 1.9756098 |

|            |          |            |          |            |          |            |          |            |               |             |            |            |           |
|------------|----------|------------|----------|------------|----------|------------|----------|------------|---------------|-------------|------------|------------|-----------|
| A_55_P2112 | 243.9    | Detected   | 270.3    | Detected   | 249.5    | Detected   | 267.4    | Detected   | Crtc2         | 1.096350964 | 1.02296023 | 0.98927118 | 0.9230485 |
| A_55_P2018 | 7095.7   | Detected   | 4432     | Detected   | 11189    | Detected   | 7778.9   | Detected   | Lmo4          | 1.096283665 | 1.5768705  | 1.75516697 | 2.5245939 |
| A_51_P2817 | 27324.1  | Detected   | 27405.8  | Detected   | 29481.7  | Detected   | 29951.6  | Detected   | Khsrp         | 1.096160532 | 1.07896326 | 1.09289275 | 1.0757467 |
| A_55_P2100 | 46.8     | Detected   | 62.1     | Detected   | 58.6     | Detected   | 51.3     | Not Detect | Wibg          | 1.096153846 | 1.25213675 | 0.82608696 | 0.9436393 |
| A_51_P4537 | 20.8     | Detected   | 34.7     | Detected   | 27.6     | Detected   | 22.8     | Not Detect | Apol11b       | 1.096153846 | 1.32692308 | 0.65706052 | 0.795389  |
| A_52_P3274 | 7690.8   | Detected   | 7686.4   | Detected   | 7315.1   | Detected   | 8430.1   | Detected   | Med7          | 1.096127841 | 0.95114943 | 1.09675531 | 0.9516939 |
| A_55_P2289 | 840      | Detected   | 713.1    | Detected   | 901.4    | Detected   | 920.7    | Detected   | Fam160a2      | 1.096071429 | 1.07309524 | 1.29112326 | 1.2640583 |
| A_55_P1962 | 8988.5   | Detected   | 6844.8   | Detected   | 8004.4   | Detected   | 9851.6   | Detected   | Clcn4-2       | 1.096022696 | 0.89051566 | 1.43928237 | 1.1694133 |
| A_51_P2150 | 13152.9  | Detected   | 7548.4   | Detected   | 18892.8  | Detected   | 14415.3  | Detected   | Mgst3         | 1.095978834 | 1.43639806 | 1.90971597 | 2.502888  |
| A_51_P3461 | 84.4     | Detected   | 126.5    | Detected   | 97.2     | Detected   | 92.5     | Detected   | Aspdh         | 1.095971564 | 1.15165877 | 0.7312253  | 0.7683794 |
| A_55_P1994 | 5333.6   | Detected   | 6370.1   | Detected   | 4845.3   | Detected   | 5845.2   | Detected   | Snx16         | 1.095920204 | 0.90844833 | 0.91759941 | 0.7606317 |
| A_55_P2043 | 12172.2  | Detected   | 13553.8  | Detected   | 15874.1  | Detected   | 13339.5  | Detected   | Psmg2         | 1.095898851 | 1.30412744 | 0.98418894 | 1.1711918 |
| A_55_P2114 | 20887.8  | Detected   | 19313.9  | Detected   | 18145.9  | Detected   | 22890.4  | Detected   | Car4          | 1.095874147 | 0.86873199 | 1.18517751 | 0.9395254 |
| A_55_P2069 | 340650.7 | Detected   | 385810.1 | Detected   | 357905.9 | Detected   | 373299.8 | Detected   | Uba52         | 1.095843337 | 1.05065365 | 0.96757394 | 0.9276737 |
| A_55_P2024 | 54967.9  | Detected   | 54005.3  | Detected   | 62048.5  | Detected   | 60233.5  | Detected   | Zfp706        | 1.095794091 | 1.12881336 | 1.11532572 | 1.1489335 |
| A_52_P3213 | 145025.6 | Detected   | 158740.2 | Detected   | 146101.8 | Detected   | 158911.1 | Detected   | ATP6          | 1.095745165 | 1.00742076 | 1.0010766  | 0.9203831 |
| A_51_P2264 | 1293.5   | Detected   | 1285.8   | Detected   | 1059.1   | Detected   | 1417.3   | Detected   | Mypop         | 1.095709316 | 0.81878624 | 1.10227096 | 0.8236895 |
| A_51_P1887 | 4082.9   | Detected   | 3338.6   | Detected   | 3649.9   | Detected   | 4473.6   | Detected   | Akr7a5        | 1.095691788 | 0.89394793 | 1.33996286 | 1.0932427 |
| A_66_P1247 | 13968.4  | Detected   | 11467.7  | Detected   | 14880.1  | Detected   | 15303.6  | Detected   | Tbcb          | 1.095587182 | 1.06526875 | 1.33449602 | 1.2975662 |
| A_51_P3711 | 14524    | Detected   | 10155.7  | Detected   | 12056    | Detected   | 15911.6  | Detected   | Bag3          | 1.095538419 | 0.83007436 | 1.56676546 | 1.1871166 |
| A_51_P1025 | 22922.1  | Detected   | 23991.8  | Detected   | 22061.4  | Detected   | 25111.8  | Detected   | Metap1        | 1.095527897 | 0.96245108 | 1.04668262 | 0.9195392 |
| A_55_P2168 | 857.9    | Detected   | 627      | Detected   | 528.4    | Detected   | 939.8    | Detected   | Amer1         | 1.095465672 | 0.6159226  | 1.49888357 | 0.8427432 |
| A_51_P2484 | 2658.5   | Detected   | 2649.8   | Detected   | 3639.6   | Detected   | 2912.1   | Detected   | Poglut1       | 1.095392138 | 1.36904269 | 1.0989886  | 1.3735376 |
| A_55_P2005 | 158.3    | Detected   | 155.8    | Detected   | 151      | Detected   | 173.4    | Detected   | Lin9          | 1.095388503 | 0.95388503 | 1.11296534 | 0.9691913 |
| A_51_P4000 | 2386.3   | Detected   | 2684.5   | Detected   | 3053.3   | Detected   | 2613.8   | Detected   | Ubxn2a        | 1.095335876 | 1.27951222 | 0.97366362 | 1.1373813 |
| A_55_P1982 | 55893.5  | Detected   | 47182.2  | Detected   | 70175.6  | Detected   | 61220.1  | Detected   | Drap1         | 1.095299096 | 1.25552345 | 1.29752534 | 1.4873321 |
| A_52_P4920 | 82.9     | Detected   | 103.7    | Detected   | 104.1    | Detected   | 90.8     | Detected   | Dusp16        | 1.095295537 | 1.25572979 | 0.8756027  | 1.0038573 |
| A_51_P1047 | 21       | Detected   | 7.4      | Not Detect | 9.1      | Not Detect | 23       | Not Detect | Rsph6a        | 1.095238095 | 0.43333333 | 3.10810811 | 1.2297297 |
| A_51_P4643 | 8.4      | Not Detect | 3.3      | Not Detect | 21.1     | Detected   | 9.2      | Not Detect | Klb           | 1.095238095 | 2.51190476 | 2.78787879 | 6.3939394 |
| A_55_P2372 | 8.4      | Not Detect | 3.3      | Not Detect | 35.4     | Detected   | 9.2      | Not Detect | 4122401K19Rik | 1.095238095 | 4.21428571 | 2.78787879 | 10.727273 |
| A_51_P3252 | 254.2    | Detected   | 301.4    | Detected   | 312.8    | Detected   | 278.4    | Detected   | 1700052N19Rik | 1.095200629 | 1.23052714 | 0.92368945 | 1.0378235 |
| A_55_P2300 | 264.8    | Detected   | 316.5    | Detected   | 270.2    | Detected   | 290      | Detected   | AW050198      | 1.095166163 | 1.02039275 | 0.91627172 | 0.8537125 |
| A_52_P1143 | 30.5     | Detected   | 28.4     | Detected   | 28.7     | Detected   | 33.4     | Not Detect | B130006D01Rik | 1.095081967 | 0.94098361 | 1.17605634 | 1.0105634 |
| A_52_P3294 | 58.9     | Detected   | 42.8     | Detected   | 74.7     | Detected   | 64.5     | Detected   | Mbp           | 1.095076401 | 1.26825127 | 1.50700935 | 1.7453271 |
| A_52_P3189 | 3745.5   | Detected   | 4531.6   | Detected   | 4756.7   | Detected   | 4101.6   | Detected   | Ap3m1         | 1.095074089 | 1.26997731 | 0.90511078 | 1.0496734 |
| A_51_P4880 | 3003.4   | Detected   | 2101.3   | Detected   | 2372.3   | Detected   | 3288.8   | Detected   | Pde6d         | 1.095025638 | 0.78987148 | 1.56512635 | 1.1289678 |
| A_55_P2113 | 12271.7  | Detected   | 15486    | Detected   | 8822.8   | Detected   | 13437.5  | Detected   | Tbc1d1        | 1.094999063 | 0.71895499 | 0.86771923 | 0.5697275 |
| A_66_P1294 | 3569     | Detected   | 3571.4   | Detected   | 3856.6   | Detected   | 3907.9   | Detected   | Tmed9         | 1.09495657  | 1.0805828  | 1.09422075 | 1.0798566 |
| A_55_P1964 | 4683     | Detected   | 5546.3   | Detected   | 4054.4   | Detected   | 5127.6   | Detected   | Elac2         | 1.094939142 | 0.86576981 | 0.92450823 | 0.7310099 |
| A_55_P2322 | 84.3     | Detected   | 63.3     | Detected   | 22.8     | Detected   | 92.3     | Detected   | 5930433N17Rik | 1.09489917  | 0.27046263 | 1.45813586 | 0.3601896 |

|            |         |          |          |            |          |            |          |            |               |             |            |            |           |
|------------|---------|----------|----------|------------|----------|------------|----------|------------|---------------|-------------|------------|------------|-----------|
| A_55_P1971 | 4003.7  | Detected | 2596.6   | Detected   | 3913.5   | Detected   | 4383.3   | Detected   | Ciz1          | 1.094812299 | 0.97747084 | 1.68809212 | 1.5071632 |
| A_55_P1955 | 44975.2 | Detected | 38295.3  | Detected   | 43280    | Detected   | 49236.9  | Detected   | Gm13304       | 1.094756666 | 0.96230812 | 1.28571652 | 1.1301648 |
| A_52_P5262 | 8210.1  | Detected | 8298.6   | Detected   | 11352.4  | Detected   | 8988     | Detected   | Wdr73         | 1.09474915  | 1.3827359  | 1.08307425 | 1.3679898 |
| A_55_P2066 | 281.8   | Detected | 219.8    | Detected   | 233.6    | Detected   | 308.5    | Detected   | Aak1          | 1.094748048 | 0.82895671 | 1.40354868 | 1.0627843 |
| A_55_P2205 | 54.9    | Detected | 72       | Detected   | 43.6     | Detected   | 60.1     | Detected   | 4933422A05Rik | 1.094717668 | 0.79417122 | 0.83472222 | 0.6055556 |
| A_55_P2043 | 1129.9  | Detected | 1171     | Detected   | 1220.6   | Detected   | 1236.9   | Detected   | Srgap2        | 1.094698646 | 1.08027259 | 1.05627669 | 1.042357  |
| A_52_P4902 | 1066.7  | Detected | 855.9    | Detected   | 1035.1   | Detected   | 1167.7   | Detected   | Nup98         | 1.094684541 | 0.97037593 | 1.36429489 | 1.2093703 |
| A_55_P1994 | 78.2    | Detected | 41.6     | Detected   | 58.8     | Detected   | 85.6     | Detected   | Sptbn5        | 1.094629156 | 0.75191816 | 2.05769231 | 1.4134615 |
| A_55_P2100 | 573.9   | Detected | 626.7    | Detected   | 1314     | Detected   | 628.2    | Detected   | Fjx1          | 1.094615787 | 2.28959749 | 1.00239349 | 2.096697  |
| A_52_P3774 | 1621.4  | Detected | 1752.7   | Detected   | 1519.3   | Detected   | 1774.8   | Detected   | Disp1         | 1.094609597 | 0.93702973 | 1.01260912 | 0.866834  |
| A_52_P5996 | 3165.3  | Detected | 4308.2   | Detected   | 2510.5   | Detected   | 3464.7   | Detected   | Pfas          | 1.094588191 | 0.79313177 | 0.80421058 | 0.582726  |
| A_51_P4872 | 198.8   | Detected | 127.2    | Detected   | 202.2    | Detected   | 217.6    | Detected   | Cep110        | 1.094567404 | 1.01710262 | 1.71069182 | 1.5896226 |
| A_55_P2047 | 785.2   | Detected | 1294.5   | Detected   | 1021.5   | Detected   | 859.4    | Detected   | Sat2          | 1.094498217 | 1.30094244 | 0.66388567 | 0.7891078 |
| A_51_P2930 | 3383.8  | Detected | 3658.4   | Detected   | 3763.2   | Detected   | 3703.3   | Detected   | Mfsd7b        | 1.094420474 | 1.11212247 | 1.01227312 | 1.0286464 |
| A_55_P2011 | 1152.2  | Detected | 1554.3   | Detected   | 1268.6   | Detected   | 1260.9   | Detected   | Zfp296        | 1.09434126  | 1.10102413 | 0.81123335 | 0.8161874 |
| A_55_P2003 | 11305   | Detected | 14379.9  | Detected   | 8165     | Detected   | 12371.4  | Detected   | Hsph1         | 1.094329943 | 0.72224679 | 0.86032587 | 0.5678065 |
| A_55_P2072 | 12288.2 | Detected | 9452.4   | Detected   | 15394.2  | Detected   | 13447.2  | Detected   | Fpgs          | 1.094318126 | 1.25276281 | 1.42262283 | 1.6286023 |
| A_51_P2486 | 7579.3  | Detected | 10033.9  | Detected   | 7266.8   | Detected   | 8293.6   | Detected   | Tdp1          | 1.094243532 | 0.95876928 | 0.82655797 | 0.7242249 |
| A_55_P2141 | 124272  | Detected | 118499.9 | Detected   | 108011.2 | Detected   | 135975.6 | Detected   | Siglech       | 1.094177289 | 0.86915154 | 1.14747439 | 0.9114877 |
| A_55_P2020 | 40980.9 | Detected | 31485.9  | Detected   | 36151.7  | Detected   | 44839.9  | Detected   | Pacsin1       | 1.094165819 | 0.88215974 | 1.42412635 | 1.148187  |
| A_55_P1961 | 5157    | Detected | 4382.4   | Detected   | 4962     | Detected   | 5642.5   | Detected   | Tmem230       | 1.094143882 | 0.96218732 | 1.28753651 | 1.1322563 |
| A_51_P1174 | 511     | Detected | 537.2    | Detected   | 373.1    | Detected   | 559.1    | Detected   | Slc27a1       | 1.094129159 | 0.73013699 | 1.04076694 | 0.6945272 |
| A_51_P1698 | 549.5   | Detected | 396.7    | Detected   | 712.4    | Detected   | 601.2    | Detected   | Zbtb3         | 1.094085532 | 1.29645132 | 1.5155029  | 1.7958155 |
| A_55_P2109 | 31.9    | Detected | 45.8     | Detected   | 31.9     | Detected   | 34.9     | Not Detect | Psg17         | 1.094043887 | 1          | 0.76200873 | 0.6965066 |
| A_51_P3672 | 913.9   | Detected | 806      | Detected   | 920.3    | Detected   | 999.8    | Detected   | Rnf135        | 1.093992778 | 1.00700295 | 1.24044665 | 1.1418114 |
| A_51_P1950 | 1513.5  | Detected | 1637.5   | Detected   | 1740.4   | Detected   | 1655.7   | Detected   | Esco2         | 1.09395441  | 1.14991741 | 1.0111145  | 1.0628397 |
| A_51_P4085 | 4596.5  | Detected | 3815.3   | Detected   | 5395.5   | Detected   | 5028.2   | Detected   | Oard1         | 1.093919286 | 1.17382791 | 1.31790423 | 1.4141745 |
| A_55_P2333 | 818     | Detected | 484.9    | Detected   | 595.2    | Detected   | 894.8    | Detected   | Mgea5         | 1.093887531 | 0.72762836 | 1.84532893 | 1.2274696 |
| A_52_P4276 | 16      | Detected | 12.5     | Not Detect | 13.2     | Not Detect | 17.5     | Not Detect | Zp3           | 1.09375     | 0.825      | 1.4        | 1.056     |
| A_65_P1648 | 23.5    | Detected | 29.6     | Detected   | 26.3     | Detected   | 25.7     | Not Detect | Pdzk1         | 1.093617021 | 1.11914894 | 0.86824324 | 0.8885135 |
| A_55_P2075 | 13850.3 | Detected | 16464.5  | Detected   | 10340.6  | Detected   | 15146.9  | Detected   | Slc20a2       | 1.093615301 | 0.74659755 | 0.91997328 | 0.6280543 |
| A_66_P1347 | 42730.6 | Detected | 36511.9  | Detected   | 49540.8  | Detected   | 46730.2  | Detected   | Psmg1         | 1.093600371 | 1.15937525 | 1.27986218 | 1.3568398 |
| A_55_P2136 | 55.6    | Detected | 59.9     | Detected   | 73.5     | Detected   | 60.8     | Detected   | Sva           | 1.09352518  | 1.32194245 | 1.01502504 | 1.2270451 |
| A_55_P1998 | 21.4    | Detected | 18.2     | Not Detect | 21.4     | Detected   | 23.4     | Not Detect | Klkb1         | 1.093457944 | 1          | 1.28571429 | 1.1758242 |
| A_51_P4199 | 4934.1  | Detected | 6423.8   | Detected   | 4931.3   | Detected   | 5395.2   | Detected   | Eaf1          | 1.093451693 | 0.99943252 | 0.83987671 | 0.7676609 |
| A_55_P2152 | 72.8    | Detected | 69.5     | Detected   | 116.1    | Detected   | 79.6     | Detected   | Tesc          | 1.093406593 | 1.59478022 | 1.14532374 | 1.6705036 |
| A_51_P3797 | 2226.9  | Detected | 1830.1   | Detected   | 2190     | Detected   | 2434.8   | Detected   | Nrm           | 1.09335848  | 0.98342988 | 1.3304191  | 1.1966559 |
| A_55_P1991 | 200.5   | Detected | 147.2    | Detected   | 209.9    | Detected   | 219.2    | Detected   | Mtcp1         | 1.093266833 | 1.04688279 | 1.48913043 | 1.4259511 |
| A_51_P2889 | 8459    | Detected | 7443     | Detected   | 6339.5   | Detected   | 9247.3   | Detected   | Clip1         | 1.093190684 | 0.74943847 | 1.24241569 | 0.8517399 |
| A_55_P2007 | 36.5    | Detected | 37       | Detected   | 97.1     | Detected   | 39.9     | Not Detect | Spdef         | 1.093150685 | 2.66027397 | 1.07837838 | 2.6243243 |



|            |          |            |          |            |          |            |          |            |               |             |            |            |           |
|------------|----------|------------|----------|------------|----------|------------|----------|------------|---------------|-------------|------------|------------|-----------|
| A_55_P2069 | 6264.3   | Detected   | 5747.5   | Detected   | 6634.5   | Detected   | 6847.2   | Detected   | Klhl12        | 1.093051099 | 1.05909679 | 1.19133536 | 1.154328  |
| A_55_P1981 | 11768.6  | Detected   | 6641.5   | Detected   | 10824.7  | Detected   | 12863    | Detected   | Gsk3b         | 1.092993219 | 0.91979505 | 1.93676127 | 1.6298577 |
| A_55_P2127 | 83.9     | Detected   | 86.2     | Detected   | 62.9     | Detected   | 91.7     | Detected   | Arhgef19      | 1.092967819 | 0.74970203 | 1.0638051  | 0.7296984 |
| A_51_P2449 | 1892     | Detected   | 1466     | Detected   | 2026.8   | Detected   | 2067.7   | Detected   | AI837181      | 1.092864693 | 1.07124736 | 1.41043656 | 1.3825375 |
| A_51_P4519 | 14       | Not Detect | 116.9    | Detected   | 6        | Not Detect | 15.3     | Not Detect | Gml           | 1.092857143 | 0.42857143 | 0.13088109 | 0.0513259 |
| A_55_P2081 | 201473.9 | Detected   | 229325.2 | Detected   | 237427.9 | Detected   | 220168.9 | Detected   | Atp5g2        | 1.092791175 | 1.17845488 | 0.96007286 | 1.0353328 |
| A_55_P2276 | 19.4     | Detected   | 17.1     | Not Detect | 28.3     | Detected   | 21.2     | Not Detect | Asb2          | 1.092783505 | 1.45876289 | 1.23976608 | 1.6549708 |
| A_51_P1672 | 117.6    | Detected   | 117.5    | Detected   | 109.5    | Detected   | 128.5    | Detected   | Cd5           | 1.092687075 | 0.93112245 | 1.09361702 | 0.9319149 |
| A_52_P6214 | 20360.1  | Detected   | 21400.6  | Detected   | 22496    | Detected   | 22246    | Detected   | LOC101056069  | 1.092627246 | 1.10490616 | 1.03950357 | 1.0511855 |
| A_55_P2054 | 27558.6  | Detected   | 25653.1  | Detected   | 25163.3  | Detected   | 30110.9  | Detected   | Med8          | 1.092613558 | 0.91308339 | 1.17377237 | 0.9809068 |
| A_52_P2836 | 2571.8   | Detected   | 2834.7   | Detected   | 2220.2   | Detected   | 2809.9   | Detected   | Rps6ka3       | 1.092581072 | 0.86328641 | 0.99125128 | 0.7832222 |
| A_55_P1968 | 5631.9   | Detected   | 6174.6   | Detected   | 5671.6   | Detected   | 6153.3   | Detected   | Ttc4          | 1.092579769 | 1.00704913 | 0.99655038 | 0.9185372 |
| A_55_P2140 | 7826.6   | Detected   | 4867.7   | Detected   | 8343.3   | Detected   | 8550.1   | Detected   | Mis18a        | 1.092441162 | 1.06601845 | 1.75649691 | 1.7140128 |
| A_55_P2069 | 13342    | Detected   | 15171.3  | Detected   | 12583.8  | Detected   | 14575.1  | Detected   | Fxr1          | 1.092422425 | 0.94317194 | 0.96070212 | 0.8294477 |
| A_55_P2176 | 9550     | Detected   | 10996.8  | Detected   | 8038.2   | Detected   | 10431.4  | Detected   | Gm6115        | 1.092293194 | 0.84169634 | 0.94858504 | 0.7309581 |
| A_52_P6807 | 139.8    | Detected   | 174.8    | Detected   | 62.7     | Detected   | 152.7    | Detected   | Cux1          | 1.092274678 | 0.44849785 | 0.87356979 | 0.3586957 |
| A_55_P1968 | 107831.1 | Detected   | 101826.8 | Detected   | 115055.8 | Detected   | 117778.8 | Detected   | Aes           | 1.092252606 | 1.06700015 | 1.15665817 | 1.1299167 |
| A_52_P5062 | 21.7     | Detected   | 20.2     | Detected   | 10       | Not Detect | 23.7     | Not Detect | Olf441        | 1.092165899 | 0.46082949 | 1.17326733 | 0.4950495 |
| A_51_P3243 | 21.7     | Detected   | 28.3     | Detected   | 75.3     | Detected   | 23.7     | Not Detect | Mfi2          | 1.092165899 | 3.47004608 | 0.83745583 | 2.6607774 |
| A_55_P2409 | 1010.4   | Detected   | 929.3    | Detected   | 930.4    | Detected   | 1103.5   | Detected   | 9030624J02Rik | 1.092141726 | 0.92082344 | 1.18745292 | 1.0011837 |
| A_55_P2166 | 73.8     | Detected   | 129.6    | Detected   | 50.3     | Detected   | 80.6     | Detected   | Timm10b       | 1.092140921 | 0.68157182 | 0.62191358 | 0.3881173 |
| A_55_P2106 | 54.3     | Detected   | 43.4     | Detected   | 37.3     | Detected   | 59.3     | Detected   | Arid4b        | 1.092081031 | 0.68692449 | 1.36635945 | 0.859447  |
| A_55_P2043 | 1598.6   | Detected   | 1750.6   | Detected   | 2037.6   | Detected   | 1745.8   | Detected   | LOC101056547  | 1.09208057  | 1.27461529 | 0.99725808 | 1.1639438 |
| A_51_P4266 | 26126.9  | Detected   | 34336.5  | Detected   | 31143.5  | Detected   | 28532.6  | Detected   | Dnrtip2       | 1.092077514 | 1.192009   | 0.83096996 | 0.9070086 |
| A_51_P3459 | 28491.5  | Detected   | 38867.7  | Detected   | 33157.6  | Detected   | 31113.9  | Detected   | Dohh          | 1.092041486 | 1.16377165 | 0.80050788 | 0.8530888 |
| A_51_P2133 | 105.6    | Detected   | 70.5     | Detected   | 211.1    | Detected   | 115.3    | Detected   | Hdac11        | 1.091856061 | 1.99905303 | 1.63546099 | 2.9943262 |
| A_55_P1981 | 231.9    | Detected   | 221.4    | Detected   | 297.5    | Detected   | 253.2    | Detected   | Tnfrsf13b     | 1.091849935 | 1.28288055 | 1.14363144 | 1.3437218 |
| A_55_P2020 | 721.3    | Detected   | 704.8    | Detected   | 611.5    | Detected   | 787.5    | Detected   | Trip11        | 1.091778733 | 0.84777485 | 1.11733825 | 0.867622  |
| A_55_P2167 | 4212.7   | Detected   | 4389.5   | Detected   | 5456.3   | Detected   | 4599.3   | Detected   | Atp5sl        | 1.091770124 | 1.2952026  | 1.04779588 | 1.2430345 |
| A_51_P1039 | 18959.1  | Detected   | 20948.5  | Detected   | 22657.7  | Detected   | 20696.7  | Detected   | Mpc2          | 1.09164992  | 1.1950831  | 0.98798005 | 1.0815906 |
| A_55_P2081 | 268.5    | Detected   | 344.9    | Detected   | 1067.7   | Detected   | 293.1    | Detected   | Dlx4          | 1.091620112 | 3.97653631 | 0.84981154 | 3.0956799 |
| A_55_P2007 | 827.1    | Detected   | 838.9    | Detected   | 696.8    | Detected   | 902.8    | Detected   | Krt16         | 1.091524604 | 0.84246161 | 1.07617118 | 0.8306115 |
| A_52_P1403 | 173.8    | Detected   | 164.2    | Detected   | 146.3    | Detected   | 189.7    | Detected   | Mtmr1         | 1.091484465 | 0.84177215 | 1.15529842 | 0.8909866 |
| A_55_P2089 | 6925.6   | Detected   | 5847.8   | Detected   | 6457.1   | Detected   | 7559     | Detected   | Synrg         | 1.09145778  | 0.93235243 | 1.29262287 | 1.104193  |
| A_55_P2005 | 44413.4  | Detected   | 41848.6  | Detected   | 53397.8  | Detected   | 48475.2  | Detected   | Gm5848        | 1.091454381 | 1.2022903  | 1.15834699 | 1.2759758 |
| A_55_P2051 | 8018.5   | Detected   | 7796.6   | Detected   | 4603.8   | Detected   | 8751.8   | Detected   | Pbx1          | 1.09145102  | 0.57414728 | 1.12251494 | 0.5904882 |
| A_55_P2175 | 198      | Detected   | 180.4    | Detected   | 190.7    | Detected   | 216.1    | Detected   | Uros          | 1.091414141 | 0.96313131 | 1.19789357 | 1.0570953 |
| A_55_P2081 | 98.5     | Detected   | 82.5     | Detected   | 91.7     | Detected   | 107.5    | Detected   | Fbxo39        | 1.091370558 | 0.93096447 | 1.3030303  | 1.1115152 |
| A_66_P1303 | 76.7     | Detected   | 59.2     | Detected   | 57.3     | Detected   | 83.7     | Detected   | 4930520P13Rik | 1.091264668 | 0.74706649 | 1.41385135 | 0.9679054 |
| A_51_P3498 | 12870.2  | Detected   | 13391.4  | Detected   | 13829.8  | Detected   | 14044.6  | Detected   | 1700021F05Rik | 1.091249553 | 1.07455984 | 1.04877757 | 1.0327374 |

|            |                   |                  |                   |                   |               |             |            |            |           |
|------------|-------------------|------------------|-------------------|-------------------|---------------|-------------|------------|------------|-----------|
| A_55_P2349 | 36.2 Detected     | 34.5 Detected    | 25 Detected       | 39.5 Not Detect   | Ptk2          | 1.091160221 | 0.69060773 | 1.14492754 | 0.7246377 |
| A_65_P1786 | 156.9 Detected    | 189.6 Detected   | 139.6 Detected    | 171.2 Detected    | Rpf1          | 1.091140854 | 0.88973869 | 0.90295359 | 0.7362869 |
| A_55_P2133 | 1475.8 Detected   | 1010.8 Detected  | 1105.3 Detected   | 1610.3 Detected   | 4922501C03Rik | 1.09113701  | 0.74894972 | 1.59309458 | 1.0934903 |
| A_51_P4948 | 6647.2 Detected   | 8571.9 Detected  | 2609.7 Detected   | 7253 Detected     | Mfhas1        | 1.091136117 | 0.3926014  | 0.8461368  | 0.3044483 |
| A_66_P1163 | 9494.7 Detected   | 5876.6 Detected  | 11798.9 Detected  | 10358.2 Detected  | Pwwp2b        | 1.090945475 | 1.24268276 | 1.76261784 | 2.0077766 |
| A_55_P2034 | 80.3 Detected     | 79.5 Detected    | 78.6 Detected     | 87.6 Detected     | Gabre         | 1.090909091 | 0.97882939 | 1.10188679 | 0.9886792 |
| A_55_P2371 | 15.4 Detected     | 15.3 Detected    | 3.5 Not Detect    | 16.8 Not Detect   | Sox2ot        | 1.090909091 | 0.22727273 | 1.09803922 | 0.2287582 |
| A_55_P2104 | 93.5 Detected     | 101.9 Detected   | 103 Detected      | 102 Detected      | Pxdn          | 1.090909091 | 1.10160428 | 1.00098135 | 1.0107949 |
| A_51_P3594 | 3827.7 Detected   | 3476.3 Detected  | 5235 Detected     | 4175.6 Detected   | Zfp1          | 1.090890091 | 1.36766204 | 1.20116216 | 1.5059115 |
| A_66_P1230 | 4834.5 Detected   | 6504.8 Detected  | 5228.1 Detected   | 5273.9 Detected   | Twistnb       | 1.090888406 | 1.08141483 | 0.81077051 | 0.8037296 |
| A_55_P2100 | 22571.7 Detected  | 20139.7 Detected | 22688.7 Detected  | 24623.2 Detected  | Hmces         | 1.090888148 | 1.00518348 | 1.22262    | 1.1265659 |
| A_52_P4667 | 122.2 Detected    | 127.3 Detected   | 128.4 Detected    | 133.3 Detected    | Rngtt         | 1.090834697 | 1.0507365  | 1.04713276 | 1.008641  |
| A_51_P1402 | 1637.2 Detected   | 1367 Detected    | 1852.6 Detected   | 1785.9 Detected   | Ndufv3        | 1.0908258   | 1.13156609 | 1.30643745 | 1.3552304 |
| A_55_P2275 | 110.2 Detected    | 98 Detected      | 122.5 Detected    | 120.2 Detected    | Mid2          | 1.090744102 | 1.11161525 | 1.22653061 | 1.25      |
| A_52_P6391 | 1965 Detected     | 2049.1 Detected  | 1812.2 Detected   | 2143.3 Detected   | Lrrc14        | 1.090737913 | 0.92223919 | 1.0459714  | 0.8843883 |
| A_55_P2111 | 25862.3 Detected  | 33020.7 Detected | 32764.5 Detected  | 28207.5 Detected  | Eny2          | 1.090680257 | 1.26688268 | 0.85423689 | 0.9922412 |
| A_51_P3327 | 27809 Detected    | 26177 Detected   | 31857 Detected    | 30330.6 Detected  | Clptm1        | 1.090675681 | 1.14556439 | 1.15867364 | 1.2169844 |
| A_52_P6217 | 1149.9 Detected   | 793.4 Detected   | 1387.6 Detected   | 1254.1 Detected   | Shoc2         | 1.090616575 | 1.20671363 | 1.58066549 | 1.7489287 |
| A_55_P2044 | 46.4 Detected     | 40.4 Detected    | 49.2 Detected     | 50.6 Detected     | Asb10         | 1.090517241 | 1.06034483 | 1.25247525 | 1.2178218 |
| A_55_P2348 | 40.9 Detected     | 71.5 Detected    | 24.4 Detected     | 44.6 Not Detect   | 1700003116Rik | 1.090464548 | 0.59657702 | 0.62377622 | 0.3412587 |
| A_66_P1341 | 96.2 Detected     | 83.8 Detected    | 81.8 Detected     | 104.9 Detected    | Adck1         | 1.09043659  | 0.85031185 | 1.25178998 | 0.9761337 |
| A_66_P1113 | 2905 Detected     | 2245.7 Detected  | 2521.5 Detected   | 3167.5 Detected   | Mplkip        | 1.090361446 | 0.86798623 | 1.41047335 | 1.1228125 |
| A_55_P1979 | 42858 Detected    | 52428.5 Detected | 39976.1 Detected  | 46730.3 Detected  | Prdx2         | 1.09035186  | 0.93275701 | 0.89131484 | 0.762488  |
| A_52_P4271 | 294.7 Detected    | 424.1 Detected   | 253.2 Detected    | 321.3 Detected    | Zfp202        | 1.090261283 | 0.85917883 | 0.75760434 | 0.597029  |
| A_55_P2047 | 4255.9 Detected   | 4101.7 Detected  | 4655.9 Detected   | 4640 Detected     | Sifn5         | 1.090251181 | 1.09398717 | 1.13123827 | 1.1351147 |
| A_55_P2117 | 12018.1 Detected  | 15820.6 Detected | 14857.3 Detected  | 13101.9 Detected  | Pa2g4         | 1.090180644 | 1.23624367 | 0.82815443 | 0.939111  |
| A_55_P2160 | 2330.4 Detected   | 2058.7 Detected  | 2751 Detected     | 2540.5 Detected   | Anapc15       | 1.090156196 | 1.18048404 | 1.23403118 | 1.3362802 |
| A_66_P1131 | 46.6 Detected     | 53 Detected      | 46.7 Detected     | 50.8 Not Detect   | Gm9878        | 1.090128755 | 1.00214592 | 0.95849057 | 0.8811321 |
| A_55_P1952 | 68.8 Detected     | 64.9 Detected    | 39.5 Detected     | 75 Detected       | Sh3rf1        | 1.090116279 | 0.57412791 | 1.15562404 | 0.6086287 |
| A_52_P5044 | 7306.9 Detected   | 6139 Detected    | 6505.1 Detected   | 7964.7 Detected   | Adprh         | 1.090024497 | 0.8902681  | 1.29739371 | 1.0596351 |
| A_52_P5444 | 58.9 Detected     | 56.7 Detected    | 51.1 Detected     | 64.2 Detected     | Terc          | 1.089983022 | 0.86757216 | 1.13227513 | 0.9012346 |
| A_51_P2880 | 1794.8 Detected   | 2052.3 Detected  | 1788 Detected     | 1956.3 Detected   | Haus6         | 1.089982171 | 0.99621128 | 0.95322321 | 0.8712177 |
| A_51_P4231 | 9329.5 Detected   | 10094.2 Detected | 9936.8 Detected   | 10168.7 Detected  | Gba           | 1.08995123  | 1.06509459 | 1.00738048 | 0.9844069 |
| A_55_P2093 | 1850.1 Detected   | 1640.3 Detected  | 2072.7 Detected   | 2016.5 Detected   | Rnf121        | 1.089941084 | 1.12031782 | 1.22934829 | 1.2636103 |
| A_55_P2230 | 104807.9 Detected | 98785.7 Detected | 115160.5 Detected | 114229.3 Detected | 4931402H11Rik | 1.089892079 | 1.09877691 | 1.15633437 | 1.1657608 |
| A_55_P2225 | 8.9 Not Detect    | 18.7 Detected    | 18.2 Detected     | 9.7 Not Detect    | 1700007J10Rik | 1.08988764  | 2.04494382 | 0.51871658 | 0.973262  |
| A_55_P2280 | 4979.1 Detected   | 4669.8 Detected  | 4181.3 Detected   | 5426.5 Detected   | 4930570B17Rik | 1.089855596 | 0.83977024 | 1.1620412  | 0.8953917 |
| A_52_P6716 | 517.7 Detected    | 475.6 Detected   | 415.1 Detected    | 564.2 Detected    | Trim45        | 1.089820359 | 0.80181572 | 1.186291   | 0.8727923 |
| A_55_P1976 | 33.4 Detected     | 51.3 Detected    | 56.8 Detected     | 36.4 Not Detect   | Gm15753       | 1.089820359 | 1.7005988  | 0.70955166 | 1.1072125 |
| A_51_P1148 | 5888.7 Detected   | 5740.7 Detected  | 7053 Detected     | 6417.5 Detected   | Clns1a        | 1.089799107 | 1.19771766 | 1.11789503 | 1.2285958 |

|            |         |            |         |            |         |            |         |            |               |             |            |            |           |
|------------|---------|------------|---------|------------|---------|------------|---------|------------|---------------|-------------|------------|------------|-----------|
| A_55_P2006 | 93.6    | Detected   | 82.5    | Detected   | 106.8   | Detected   | 102     | Detected   | Krtap9-1      | 1.08974359  | 1.14102564 | 1.23636364 | 1.2945455 |
| A_51_P2439 | 14079.6 | Detected   | 11713.4 | Detected   | 15177.9 | Detected   | 15343.1 | Detected   | Skap2         | 1.089739765 | 1.07800648 | 1.30987587 | 1.2957724 |
| A_65_P0903 | 8797.7  | Detected   | 4858.9  | Detected   | 7043.8  | Detected   | 9587.2  | Detected   | Rab43         | 1.089739364 | 0.80064108 | 1.97312149 | 1.4496697 |
| A_66_P1064 | 28379   | Detected   | 37879.3 | Detected   | 34768.2 | Detected   | 30924.6 | Detected   | Cct3          | 1.08970013  | 1.22513831 | 0.8163984  | 0.9178681 |
| A_55_P2091 | 48037.9 | Detected   | 61395.4 | Detected   | 43572.1 | Detected   | 52339.7 | Detected   | Lamp3         | 1.089550126 | 0.9070359  | 0.85250198 | 0.7096965 |
| A_51_P2005 | 5194.3  | Detected   | 3150    | Detected   | 2766.3  | Detected   | 5659    | Detected   | 4930506M07Rik | 1.08946345  | 0.53256454 | 1.79650794 | 0.8781905 |
| A_55_P2183 | 10551.6 | Detected   | 10381.3 | Detected   | 10631.5 | Detected   | 11495.1 | Detected   | Snx11         | 1.089417719 | 1.00757231 | 1.10728907 | 1.024101  |
| A_52_P1683 | 455.2   | Detected   | 417.9   | Detected   | 498.1   | Detected   | 495.9   | Detected   | Fundc2        | 1.089411248 | 1.09424429 | 1.18664752 | 1.1919119 |
| A_55_P2148 | 7170.6  | Detected   | 8232.2  | Detected   | 5177.6  | Detected   | 7811.3  | Detected   | 6820431F20Rik | 1.089350961 | 0.72205952 | 0.9488715  | 0.6289449 |
| A_55_P2168 | 778.4   | Detected   | 734     | Detected   | 789.7   | Detected   | 847.9   | Detected   | Cdk9          | 1.089285714 | 1.01451696 | 1.15517711 | 1.0758856 |
| A_55_P2125 | 23404.2 | Detected   | 18578   | Detected   | 25383   | Detected   | 25492.8 | Detected   | Mrps36        | 1.089240393 | 1.08454893 | 1.37220368 | 1.3662935 |
| A_55_P2028 | 53318.4 | Detected   | 49049.4 | Detected   | 61325.8 | Detected   | 58075   | Detected   | Incenp        | 1.089211229 | 1.1501808  | 1.18401041 | 1.2502864 |
| A_55_P2008 | 14.6    | Not Detect | 23.7    | Detected   | 15.8    | Not Detect | 15.9    | Not Detect | Fcgr1         | 1.089041096 | 1.08219178 | 0.67088608 | 0.6666667 |
| A_51_P2710 | 67.4    | Detected   | 62.4    | Detected   | 41.6    | Detected   | 73.4    | Detected   | Klf17         | 1.089020772 | 0.61721068 | 1.17628205 | 0.6666667 |
| A_55_P2140 | 2405.6  | Detected   | 2191.8  | Detected   | 2783.3  | Detected   | 2619.6  | Detected   | Arfp2         | 1.088959095 | 1.15700865 | 1.19518204 | 1.2698695 |
| A_55_P2009 | 3584.2  | Detected   | 2933.6  | Detected   | 3949.7  | Detected   | 3903    | Detected   | Ptbp3         | 1.088945929 | 1.10197534 | 1.33044723 | 1.3463662 |
| A_52_P5518 | 58.5    | Detected   | 82.9    | Detected   | 85.9    | Detected   | 63.7    | Detected   | Rnft1         | 1.088888889 | 1.46837607 | 0.76839566 | 1.0361882 |
| A_52_P6337 | 174.4   | Detected   | 171.3   | Detected   | 142     | Detected   | 189.9   | Detected   | Apc           | 1.088876147 | 0.81422018 | 1.10858144 | 0.828955  |
| A_55_P2043 | 82004.1 | Detected   | 57750.2 | Detected   | 87421.8 | Detected   | 89289.8 | Detected   | Bag1          | 1.088845558 | 1.06606621 | 1.54613837 | 1.5137922 |
| A_55_P2060 | 44128.9 | Detected   | 40135.4 | Detected   | 49803.8 | Detected   | 48049.2 | Detected   | Gm12657       | 1.088837474 | 1.12859827 | 1.19717755 | 1.2408946 |
| A_55_P2061 | 3361.5  | Detected   | 3380.7  | Detected   | 2945.8  | Detected   | 3660    | Detected   | Nfyc          | 1.088799643 | 0.87633497 | 1.08261603 | 0.871358  |
| A_55_P2038 | 3495.3  | Detected   | 3235.7  | Detected   | 3888.2  | Detected   | 3805.6  | Detected   | Acot8         | 1.088776357 | 1.11240809 | 1.17612881 | 1.2016565 |
| A_55_P2133 | 251.2   | Detected   | 187.7   | Detected   | 195.4   | Detected   | 273.5   | Detected   | 4922501C03Rik | 1.088773885 | 0.77786624 | 1.45711241 | 1.0410229 |
| A_55_P2015 | 1842    | Detected   | 2155.3  | Detected   | 1876    | Detected   | 2005.5  | Detected   | Alg11         | 1.088762215 | 1.0184582  | 0.93049691 | 0.8704125 |
| A_52_P4704 | 1221.7  | Detected   | 848.6   | Detected   | 1613    | Detected   | 1330.1  | Detected   | Tmem186       | 1.08872882  | 1.3202914  | 1.56740514 | 1.9007778 |
| A_52_P3909 | 1606.2  | Detected   | 1231.1  | Detected   | 1613.4  | Detected   | 1748.7  | Detected   | Trip4         | 1.088718715 | 1.00448263 | 1.42043701 | 1.3105353 |
| A_55_P1998 | 2469.1  | Detected   | 2197.4  | Detected   | 2195.6  | Detected   | 2688.1  | Detected   | Rab28         | 1.088696286 | 0.88923089 | 1.22330937 | 0.9991809 |
| A_66_P1340 | 57.5    | Detected   | 124.4   | Detected   | 72.8    | Detected   | 62.6    | Detected   | Trpm3         | 1.088695652 | 1.26608696 | 0.50321543 | 0.585209  |
| A_51_P5120 | 27522.3 | Detected   | 26769.6 | Detected   | 25126.9 | Detected   | 29962.2 | Detected   | Rer1          | 1.088651748 | 0.91296512 | 1.11926215 | 0.9386356 |
| A_51_P4946 | 4162.6  | Detected   | 4368.8  | Detected   | 5501.2  | Detected   | 4531.6  | Detected   | Sumf1         | 1.088646519 | 1.32157786 | 1.03726424 | 1.2592016 |
| A_55_P2132 | 5851    | Detected   | 5609.8  | Detected   | 5611.9  | Detected   | 6369.5  | Detected   | Pkn1          | 1.08861733  | 0.95913519 | 1.13542372 | 1.0003743 |
| A_51_P4107 | 15.8    | Detected   | 13.6    | Not Detect | 16.4    | Not Detect | 17.2    | Not Detect | Rhcg          | 1.088607595 | 1.03797468 | 1.26470588 | 1.2058824 |
| A_52_P3756 | 4835.8  | Detected   | 5422.5  | Detected   | 4496    | Detected   | 5264.1  | Detected   | Gtpbp1        | 1.088568593 | 0.92973241 | 0.97078838 | 0.8291379 |
| A_55_P2047 | 4554.1  | Detected   | 4893.4  | Detected   | 4923.7  | Detected   | 4957.3  | Detected   | Krtap4-8      | 1.088535605 | 1.08115764 | 1.01305841 | 1.006192  |
| A_55_P2143 | 41.8    | Detected   | 26.4    | Detected   | 34      | Detected   | 45.5    | Not Detect | Ass1          | 1.088516746 | 0.81339713 | 1.72348485 | 1.2878788 |
| A_51_P2070 | 14.7    | Detected   | 13.3    | Not Detect | 7.4     | Not Detect | 16      | Not Detect | Vmn1r227      | 1.088435374 | 0.50340136 | 1.20300752 | 0.556391  |
| A_52_P3703 | 29.4    | Detected   | 37.8    | Detected   | 26.2    | Detected   | 32      | Not Detect | Mapk8ip2      | 1.088435374 | 0.89115646 | 0.84656085 | 0.6931217 |
| A_55_P2020 | 2072.3  | Detected   | 1711.4  | Detected   | 1771.1  | Detected   | 2255.5  | Detected   | Rufy2         | 1.088404189 | 0.85465425 | 1.31792684 | 1.0348837 |
| A_51_P4070 | 15145.4 | Detected   | 18721.7 | Detected   | 18963.2 | Detected   | 16484.3 | Detected   | Tspan31       | 1.088403079 | 1.25207654 | 0.88049162 | 1.0128995 |
| A_55_P2159 | 5051.4  | Detected   | 8310.8  | Detected   | 5693.1  | Detected   | 5497.1  | Detected   | 2810025M15Rik | 1.088232965 | 1.12703409 | 0.66144054 | 0.6850243 |

|            |          |            |          |          |          |          |          |            |               |             |            |            |           |
|------------|----------|------------|----------|----------|----------|----------|----------|------------|---------------|-------------|------------|------------|-----------|
| A_55_P2148 | 12733.3  | Detected   | 9646.5   | Detected | 10538.1  | Detected | 13856.7  | Detected   | Cltb          | 1.088225362 | 0.82760164 | 1.43644845 | 1.0924273 |
| A_52_P2293 | 8611.9   | Detected   | 7889.6   | Detected | 7663.4   | Detected | 9371.6   | Detected   | Rptor         | 1.088215144 | 0.8898617  | 1.18784222 | 0.9713293 |
| A_51_P1951 | 4559.4   | Detected   | 4665     | Detected | 4918.4   | Detected | 4961.6   | Detected   | Gtse1         | 1.088213361 | 1.07873843 | 1.06357985 | 1.0543194 |
| A_66_P1212 | 1185.2   | Detected   | 1246.1   | Detected | 1029.9   | Detected | 1289.7   | Detected   | Ddi2          | 1.088170773 | 0.86896726 | 1.03498917 | 0.8264987 |
| A_55_P1985 | 1975.2   | Detected   | 2084.7   | Detected | 1871     | Detected | 2149.3   | Detected   | Exosc3        | 1.088142973 | 0.94724585 | 1.03098767 | 0.8974912 |
| A_55_P2031 | 870.4    | Detected   | 644.1    | Detected | 797.1    | Detected | 947.1    | Detected   | 2210008F06Rik | 1.088120404 | 0.91578585 | 1.47042385 | 1.2375408 |
| A_55_P2107 | 2167.9   | Detected   | 2225.6   | Detected | 1981.3   | Detected | 2358.9   | Detected   | Trove2        | 1.088103695 | 0.91392592 | 1.05989396 | 0.8902318 |
| A_52_P5485 | 2786.7   | Detected   | 1716.9   | Detected | 3088.5   | Detected | 3032.2   | Detected   | Ubald1        | 1.088097032 | 1.10830014 | 1.76609005 | 1.7988817 |
| A_55_P2148 | 87.6     | Detected   | 91       | Detected | 73       | Detected | 95.3     | Detected   | Gm10572       | 1.087899543 | 0.83333333 | 1.04725275 | 0.8021978 |
| A_51_P2281 | 3298.1   | Detected   | 3891.5   | Detected | 2709.8   | Detected | 3588     | Detected   | Cenpp         | 1.087899093 | 0.82162457 | 0.92200951 | 0.6963382 |
| A_55_P2006 | 10401.2  | Detected   | 8608.6   | Detected | 10141    | Detected | 11315.4  | Detected   | Mfsd12        | 1.087893705 | 0.97498366 | 1.31442976 | 1.178008  |
| A_55_P2083 | 48945.5  | Detected   | 34318.1  | Detected | 48249.8  | Detected | 53246.8  | Detected   | Wbp2          | 1.087879376 | 0.98578623 | 1.55156608 | 1.4059578 |
| A_55_P2121 | 113.8    | Detected   | 112.6    | Detected | 104.1    | Detected | 123.8    | Detected   | E530001K10Rik | 1.087873462 | 0.91476274 | 1.09946714 | 0.9245115 |
| A_66_P1361 | 2619.9   | Detected   | 2107.1   | Detected | 2505.7   | Detected | 2850.1   | Detected   | Wee1          | 1.087865949 | 0.95641055 | 1.35261734 | 1.1891699 |
| A_55_P2054 | 253.9    | Detected   | 213.3    | Detected | 252.8    | Detected | 276.2    | Detected   | Sh3bgrl2      | 1.087829854 | 0.99566759 | 1.29488983 | 1.1851852 |
| A_55_P2065 | 37161.2  | Detected   | 34328.8  | Detected | 42987.5  | Detected | 40423.5  | Detected   | H3f3a         | 1.0877878   | 1.1567845  | 1.17753898 | 1.2522284 |
| A_55_P2121 | 1144     | Detected   | 814.5    | Detected | 1475.3   | Detected | 1244.4   | Detected   | Vars2         | 1.087762238 | 1.2895979  | 1.52780847 | 1.8112953 |
| A_55_P2142 | 141.4    | Detected   | 109.3    | Detected | 149.2    | Detected | 153.8    | Detected   | Hcrt          | 1.087694484 | 1.05516266 | 1.40713632 | 1.3650503 |
| A_66_P1385 | 3580     | Detected   | 3659.6   | Detected | 3254.2   | Detected | 3893.7   | Detected   | Mnd1          | 1.087625698 | 0.90899441 | 1.06396874 | 0.8892229 |
| A_55_P2072 | 1636     | Detected   | 1931.2   | Detected | 1938.4   | Detected | 1779.3   | Detected   | Acp1          | 1.087591687 | 1.18484108 | 0.92134424 | 1.0037283 |
| A_55_P1971 | 3186.4   | Detected   | 2717.9   | Detected | 3235.1   | Detected | 3465.5   | Detected   | Acox3         | 1.087591012 | 1.01528371 | 1.27506531 | 1.190294  |
| A_55_P2034 | 449201.2 | Detected   | 451169.5 | Detected | 440447.2 | Detected | 488543.8 | Detected   | Exosc2        | 1.08758347  | 0.98051207 | 1.08283871 | 0.9762344 |
| A_55_P2153 | 98.2     | Detected   | 78.9     | Detected | 82.1     | Detected | 106.8    | Detected   | Plagl1        | 1.087576375 | 0.83604888 | 1.35361217 | 1.0405577 |
| A_51_P4952 | 57.1     | Detected   | 63.1     | Detected | 75.4     | Detected | 62.1     | Detected   | Lat           | 1.087565674 | 1.32049037 | 0.98415214 | 1.1949287 |
| A_55_P2089 | 4752.6   | Detected   | 5302.1   | Detected | 5325.6   | Detected | 5168.6   | Detected   | Adk           | 1.087531036 | 1.12056559 | 0.9748213  | 1.0044322 |
| A_55_P2158 | 12229.2  | Detected   | 17023.5  | Detected | 10700.2  | Detected | 13298.2  | Detected   | Ppid          | 1.087413731 | 0.87497138 | 0.78116721 | 0.6285546 |
| A_52_P3550 | 20551.6  | Detected   | 22832.8  | Detected | 22820.8  | Detected | 22347.9  | Detected   | Rbm8a         | 1.087404387 | 1.11041476 | 0.97876301 | 0.9994744 |
| A_51_P1610 | 904.4    | Detected   | 663.7    | Detected | 621.4    | Detected | 983.4    | Detected   | Ifit2         | 1.08735073  | 0.68708536 | 1.48169354 | 0.9362664 |
| A_51_P5011 | 1386.2   | Detected   | 1331.1   | Detected | 1491.5   | Detected | 1507.2   | Detected   | Cul5          | 1.087288991 | 1.07596306 | 1.1322966  | 1.1205018 |
| A_51_P2172 | 127.2    | Detected   | 120.1    | Detected | 137      | Detected | 138.3    | Detected   | Lemd3         | 1.087264151 | 1.07704403 | 1.15154038 | 1.1407161 |
| A_51_P2309 | 60414.9  | Detected   | 52440.4  | Detected | 48574.5  | Detected | 65685.6  | Detected   | Cdc42         | 1.087241723 | 0.80401523 | 1.25257626 | 0.9262801 |
| A_51_P4040 | 5970     | Detected   | 6057.4   | Detected | 5917     | Detected | 6490.5   | Detected   | Psmb2         | 1.08718593  | 0.99112228 | 1.07149932 | 0.9768217 |
| A_52_P5025 | 40.2     | Detected   | 26.5     | Detected | 56.2     | Detected | 43.7     | Not Detect | S1pr3         | 1.087064677 | 1.39800995 | 1.6490566  | 2.1207547 |
| A_55_P2271 | 294.4    | Detected   | 249.6    | Detected | 205.4    | Detected | 320      | Detected   | C230037L09    | 1.086956522 | 0.69769022 | 1.28205128 | 0.8229167 |
| A_52_P3072 | 9.2      | Not Detect | 19.4     | Detected | 21.7     | Detected | 10       | Not Detect | Abca17        | 1.086956522 | 2.35869565 | 0.51546392 | 1.1185567 |
| A_55_P2168 | 306      | Detected   | 432.5    | Detected | 324.7    | Detected | 332.6    | Detected   | Nudcd1        | 1.086928105 | 1.06111111 | 0.76901734 | 0.7507514 |
| A_52_P5989 | 589.1    | Detected   | 585.3    | Detected | 507.7    | Detected | 640.3    | Detected   | Erc1          | 1.086912239 | 0.86182312 | 1.0939689  | 0.8674184 |
| A_55_P2452 | 3462.2   | Detected   | 3460.8   | Detected | 2703.5   | Detected | 3763.1   | Detected   | Gls           | 1.086910057 | 0.78086188 | 1.08734975 | 0.7811778 |
| A_51_P3532 | 118.8    | Detected   | 117.9    | Detected | 122.1    | Detected | 129.1    | Detected   | Tnnc2         | 1.086700337 | 1.02777778 | 1.09499576 | 1.0356234 |
| A_51_P2996 | 3963.1   | Detected   | 2005.2   | Detected | 1136.2   | Detected | 4306.4   | Detected   | Spef1         | 1.086624107 | 0.28669476 | 2.1476162  | 0.5666268 |

|            |          |            |          |          |          |            |          |            |               |             |            |            |           |
|------------|----------|------------|----------|----------|----------|------------|----------|------------|---------------|-------------|------------|------------|-----------|
| A_55_P2031 | 895.7    | Detected   | 854.6    | Detected | 745.3    | Detected   | 973.2    | Detected   | Ube2l6        | 1.086524506 | 0.83208664 | 1.13877838 | 0.8721039 |
| A_51_P1737 | 7583.2   | Detected   | 5503.3   | Detected | 7966.9   | Detected   | 8239.1   | Detected   | Dock11        | 1.086493828 | 1.05059869 | 1.49711991 | 1.4476587 |
| A_51_P1725 | 14866.8  | Detected   | 11036.1  | Detected | 18955    | Detected   | 16152.1  | Detected   | Nit1          | 1.086454382 | 1.27498857 | 1.46356956 | 1.7175451 |
| A_51_P1081 | 11749.6  | Detected   | 11229.3  | Detected | 11249.2  | Detected   | 12765.3  | Detected   | Rpl23         | 1.086445496 | 0.95741132 | 1.13678502 | 1.0017721 |
| A_52_P7336 | 15981    | Detected   | 16696.2  | Detected | 14271.1  | Detected   | 17362.1  | Detected   | Hnrnpu        | 1.086421375 | 0.89300419 | 1.03988333 | 0.8547514 |
| A_55_P1970 | 1425.6   | Detected   | 1857.7   | Detected | 1251     | Detected   | 1548.8   | Detected   | Sh3yl1        | 1.086419753 | 0.87752525 | 0.83371912 | 0.6734134 |
| A_51_P3479 | 19373.3  | Detected   | 17956.7  | Detected | 19791.3  | Detected   | 21047.4  | Detected   | Npc2          | 1.086412743 | 1.02157609 | 1.1721196  | 1.102168  |
| A_55_P2147 | 9905.6   | Detected   | 7981.2   | Detected | 13786.2  | Detected   | 10761.4  | Detected   | Mkl1          | 1.086395574 | 1.3917582  | 1.34834361 | 1.7273342 |
| A_55_P2070 | 8437.8   | Detected   | 7562.4   | Detected | 8932.3   | Detected   | 9166.4   | Detected   | Preb          | 1.086349522 | 1.05860532 | 1.21210198 | 1.1811462 |
| A_55_P2328 | 160      | Detected   | 66.9     | Detected | 40.1     | Detected   | 173.8    | Detected   | 6030451C04Rik | 1.08625     | 0.250625   | 2.59790732 | 0.5994021 |
| A_52_P6767 | 1827.4   | Detected   | 1562.2   | Detected | 1774.7   | Detected   | 1984.8   | Detected   | Gigyf1        | 1.086133304 | 0.97116121 | 1.27051594 | 1.1360261 |
| A_55_P2088 | 8108.9   | Detected   | 7675     | Detected | 6124.2   | Detected   | 8806.9   | Detected   | Golga3        | 1.08607826  | 0.75524424 | 1.14747883 | 0.7979414 |
| A_51_P3863 | 2816.2   | Detected   | 3982     | Detected | 2999.4   | Detected   | 3058.6   | Detected   | Actr6         | 1.086073432 | 1.0650522  | 0.76810648 | 0.7532396 |
| A_55_P1954 | 13202.3  | Detected   | 10387.7  | Detected | 14373.2  | Detected   | 14338.1  | Detected   | Fbxw5         | 1.086030464 | 1.08868909 | 1.38029593 | 1.3836749 |
| A_66_P1345 | 80.3     | Detected   | 64       | Detected | 57.4     | Detected   | 87.2     | Detected   | A430110L20Rik | 1.085927771 | 0.71481943 | 1.3625     | 0.896875  |
| A_55_P2184 | 18049.3  | Detected   | 21217.6  | Detected | 22760.9  | Detected   | 19600.1  | Detected   | Timm23        | 1.08592023  | 1.26104059 | 0.92376612 | 1.0727368 |
| A_51_P3957 | 1480.8   | Detected   | 1234.2   | Detected | 1742.6   | Detected   | 1608     | Detected   | Spopl         | 1.085899514 | 1.17679633 | 1.30286825 | 1.4119268 |
| A_55_P2167 | 1766.2   | Detected   | 1814.5   | Detected | 1077.3   | Detected   | 1917.9   | Detected   | 6330416G13Rik | 1.085890613 | 0.60995357 | 1.0569854  | 0.5937173 |
| A_55_P2171 | 81.5     | Detected   | 83.2     | Detected | 61.3     | Detected   | 88.5     | Detected   | Notch1        | 1.085889571 | 0.75214724 | 1.06370192 | 0.7367788 |
| A_55_P1994 | 238.7    | Detected   | 222.7    | Detected | 247.5    | Detected   | 259.2    | Detected   | Gm10697       | 1.08588186  | 1.03686636 | 1.16389762 | 1.1113606 |
| A_66_P1351 | 2983.2   | Detected   | 3889.8   | Detected | 2619.2   | Detected   | 3239.4   | Detected   | Yrdc          | 1.085880933 | 0.87798337 | 0.83279346 | 0.6733508 |
| A_55_P1960 | 751.1    | Detected   | 893      | Detected | 829.8    | Detected   | 815.6    | Detected   | Trmt5         | 1.085874051 | 1.10477966 | 0.91332587 | 0.9292273 |
| A_52_P2886 | 2761.5   | Detected   | 3071.2   | Detected | 2467.1   | Detected   | 2998.5   | Detected   | Rars          | 1.085822922 | 0.89339127 | 0.97632847 | 0.8033016 |
| A_51_P2020 | 37538.4  | Detected   | 35587    | Detected | 38143.3  | Detected   | 40758.5  | Detected   | Ncapd2        | 1.085781493 | 1.01611417 | 1.14531992 | 1.0718324 |
| A_51_P2580 | 70579.2  | Detected   | 102601.6 | Detected | 82771.2  | Detected   | 76629.7  | Detected   | Nop2          | 1.08572639  | 1.17274211 | 0.74686652 | 0.8067243 |
| A_51_P4513 | 1197     | Detected   | 925.5    | Detected | 722.3    | Detected   | 1299.6   | Detected   | Jag2          | 1.085714286 | 0.60342523 | 1.40421394 | 0.780443  |
| A_51_P1755 | 23216.7  | Detected   | 25542.8  | Detected | 29245    | Detected   | 25205.7  | Detected   | Pelo          | 1.08567109  | 1.25965361 | 0.98680254 | 1.144941  |
| A_55_P2150 | 3891.7   | Detected   | 5062.5   | Detected | 3419.8   | Detected   | 4224.7   | Detected   | Zfp593        | 1.085566719 | 0.87874194 | 0.83450864 | 0.675516  |
| A_55_P1988 | 37.4     | Detected   | 24.4     | Detected | 23       | Detected   | 40.6     | Not Detect | Cdkal1        | 1.085561497 | 0.61497326 | 1.66393443 | 0.942623  |
| A_55_P1959 | 2237     | Detected   | 2164.2   | Detected | 6791.2   | Detected   | 2428.4   | Detected   | Slc35g1       | 1.085561019 | 3.03585159 | 1.12207744 | 3.1379725 |
| A_55_P2152 | 108936.6 | Detected   | 107739.8 | Detected | 114474.5 | Detected   | 118251.4 | Detected   | Atp5h         | 1.085506616 | 1.05083599 | 1.09756469 | 1.0625089 |
| A_51_P2646 | 62       | Detected   | 50.4     | Detected | 73.6     | Detected   | 67.3     | Detected   | Strbp         | 1.085483871 | 1.18709677 | 1.33531746 | 1.4603175 |
| A_55_P2087 | 2890.2   | Detected   | 2876.3   | Detected | 2605.1   | Detected   | 3137.2   | Detected   | Olfcr373      | 1.085461214 | 0.90135631 | 1.09070681 | 0.9057122 |
| A_55_P2003 | 510.3    | Detected   | 447.5    | Detected | 463.5    | Detected   | 553.9    | Detected   | Tpx2          | 1.085439937 | 0.90828924 | 1.23776536 | 1.0357542 |
| A_55_P2024 | 3368.8   | Detected   | 3835.5   | Detected | 3725.9   | Detected   | 3656.6   | Detected   | Eral1         | 1.085431014 | 1.10600214 | 0.9533568  | 0.9714248 |
| A_51_P3621 | 2065     | Detected   | 2105.3   | Detected | 1953.6   | Detected   | 2241.4   | Detected   | Ubqln4        | 1.085423729 | 0.94605327 | 1.06464637 | 0.9279438 |
| A_55_P2100 | 28.1     | Detected   | 24.9     | Detected | 23.4     | Detected   | 30.5     | Not Detect | Defb30        | 1.085409253 | 0.83274021 | 1.2248996  | 0.939759  |
| A_55_P2175 | 16.4     | Detected   | 22       | Detected | 15.3     | Not Detect | 17.8     | Not Detect | Mettl13       | 1.085365854 | 0.93292683 | 0.80909091 | 0.6954545 |
| A_55_P2391 | 8.2      | Not Detect | 18.3     | Detected | 15.5     | Not Detect | 8.9      | Not Detect | Gm12108       | 1.085365854 | 1.8902439  | 0.4863388  | 0.8469945 |
| A_51_P2979 | 3214.5   | Detected   | 3690.2   | Detected | 2958.2   | Detected   | 3488.9   | Detected   | Pdia6         | 1.085363198 | 0.92026754 | 0.94545011 | 0.8016368 |

|            |          |            |          |          |          |            |          |            |               |             |            |            |           |
|------------|----------|------------|----------|----------|----------|------------|----------|------------|---------------|-------------|------------|------------|-----------|
| A_55_P2025 | 119.5    | Detected   | 87.2     | Detected | 126.1    | Detected   | 129.7    | Detected   | LOC101056205  | 1.085355649 | 1.05523013 | 1.48738532 | 1.4461009 |
| A_52_P1395 | 2174.5   | Detected   | 1834.3   | Detected | 1865.7   | Detected   | 2359.8   | Detected   | Edem3         | 1.085214992 | 0.85799034 | 1.28648531 | 1.0171182 |
| A_51_P3754 | 487.3    | Detected   | 458.9    | Detected | 464.9    | Detected   | 528.8    | Detected   | Phip          | 1.085163144 | 0.95403242 | 1.15232077 | 1.0130747 |
| A_55_P1958 | 3006.6   | Detected   | 2993.6   | Detected | 2401.8   | Detected   | 3262.5   | Detected   | Prpsap2       | 1.085112752 | 0.79884255 | 1.08982496 | 0.8023116 |
| A_55_P2129 | 23.5     | Detected   | 21.5     | Detected | 9.9      | Not Detect | 25.5     | Not Detect | 1700084C01Rik | 1.085106383 | 0.4212766  | 1.18604651 | 0.4604651 |
| A_55_P2062 | 20619.6  | Detected   | 21722.7  | Detected | 19232.3  | Detected   | 22373.1  | Detected   | Ttf2          | 1.085040447 | 0.93271935 | 1.02994103 | 0.885355  |
| A_55_P1972 | 14885.8  | Detected   | 12612.6  | Detected | 15960.6  | Detected   | 16151.5  | Detected   | Cab39         | 1.085027341 | 1.07220304 | 1.28058449 | 1.2654488 |
| A_52_P3583 | 30658.8  | Detected   | 36898.3  | Detected | 33936.9  | Detected   | 33264.7  | Detected   | Mtdh          | 1.084996804 | 1.10692199 | 0.90152392 | 0.9197416 |
| A_55_P2029 | 419.3    | Detected   | 269.8    | Detected | 518.5    | Detected   | 454.9    | Detected   | Dopey2        | 1.08490341  | 1.23658478 | 1.68606375 | 1.9217939 |
| A_51_P4419 | 561.9    | Detected   | 440      | Detected | 669.8    | Detected   | 609.6    | Detected   | Itga2         | 1.08489055  | 1.19202705 | 1.38545455 | 1.5222727 |
| A_51_P4625 | 528      | Detected   | 414.3    | Detected | 616.7    | Detected   | 572.8    | Detected   | Senp7         | 1.084848485 | 1.16799242 | 1.38257301 | 1.4885349 |
| A_51_P4758 | 16418.4  | Detected   | 15185.4  | Detected | 12937.7  | Detected   | 17809.8  | Detected   | Lrwd1         | 1.084746382 | 0.78800005 | 1.1728239  | 0.8519828 |
| A_66_P1339 | 33884.5  | Detected   | 28242.6  | Detected | 34556.5  | Detected   | 36755.9  | Detected   | Fundc2        | 1.084740811 | 1.01983208 | 1.30143471 | 1.2235594 |
| A_51_P1190 | 1538.2   | Detected   | 2056     | Detected | 1750.7   | Detected   | 1668.4   | Detected   | Naa30         | 1.08464439  | 1.13814849 | 0.8114786  | 0.8515078 |
| A_51_P1971 | 2269.7   | Detected   | 2474.7   | Detected | 2931.1   | Detected   | 2461.8   | Detected   | Pigk          | 1.084636736 | 1.29140415 | 0.99478725 | 1.1844264 |
| A_55_P2156 | 32566.9  | Detected   | 31803    | Detected | 33876.3  | Detected   | 35322    | Detected   | 1810022K09Rik | 1.084598166 | 1.04020647 | 1.11064994 | 1.065192  |
| A_55_P2058 | 206909.4 | Detected   | 207925.4 | Detected | 247013.8 | Detected   | 224411.8 | Detected   | Rpl13a        | 1.08458968  | 1.1938259  | 1.07928998 | 1.1879924 |
| A_55_P2043 | 1884.3   | Detected   | 1988.7   | Detected | 1731.2   | Detected   | 2043.6   | Detected   | Cdc42se1      | 1.084540678 | 0.91874967 | 1.02760597 | 0.8705184 |
| A_52_P6446 | 7816.9   | Detected   | 7164.9   | Detected | 7285.9   | Detected   | 8477.5   | Detected   | Trappc6b      | 1.084509204 | 0.93207026 | 1.18319865 | 1.0168879 |
| A_52_P2608 | 321.9    | Detected   | 298.9    | Detected | 273.1    | Detected   | 349.1    | Detected   | Zfp397        | 1.084498291 | 0.84840012 | 1.16794915 | 0.9136835 |
| A_55_P2130 | 14566.6  | Detected   | 11983    | Detected | 20633.4  | Detected   | 15796.9  | Detected   | Parl          | 1.084460341 | 1.41648703 | 1.31827589 | 1.7218893 |
| A_66_P1154 | 1480.9   | Detected   | 906.3    | Detected | 1568.2   | Detected   | 1605.9   | Detected   | Snx4          | 1.08440813  | 1.05895064 | 1.77192982 | 1.7303321 |
| A_55_P2170 | 679      | Detected   | 661.2    | Detected | 648.6    | Detected   | 736.3    | Detected   | Sh3bgrl2      | 1.084388807 | 0.95522828 | 1.11358137 | 0.9809437 |
| A_55_P2164 | 368931.2 | Detected   | 432167.1 | Detected | 399376.9 | Detected   | 400057   | Detected   | Tpt1          | 1.084367492 | 1.08252406 | 0.9256998  | 0.9241261 |
| A_51_P1928 | 335305.3 | Detected   | 350256.6 | Detected | 356956.5 | Detected   | 363592.8 | Detected   | Hint1         | 1.084363414 | 1.0645716  | 1.03807551 | 1.0191285 |
| A_55_P2053 | 346.2    | Detected   | 334.3    | Detected | 351.3    | Detected   | 375.4    | Detected   | Rgs21         | 1.08434431  | 1.01473137 | 1.12294346 | 1.0508525 |
| A_51_P1140 | 91804.2  | Detected   | 86871.3  | Detected | 106791.1 | Detected   | 99546.9  | Detected   | Tmem109       | 1.084339279 | 1.16324852 | 1.1459124  | 1.2293024 |
| A_55_P2017 | 646.6    | Detected   | 654.4    | Detected | 703.3    | Detected   | 701.1    | Detected   | Nfyb          | 1.08428704  | 1.08768945 | 1.07136308 | 1.0747249 |
| A_51_P1823 | 43.9     | Detected   | 61.3     | Detected | 47.2     | Detected   | 47.6     | Detected   | Col1a2        | 1.08428246  | 1.07517084 | 0.77650897 | 0.7699837 |
| A_66_P1309 | 47.5     | Detected   | 52.4     | Detected | 63.7     | Detected   | 51.5     | Detected   | H2-Ob         | 1.084210526 | 1.34105263 | 0.98282443 | 1.2156489 |
| A_51_P2830 | 9.5      | Not Detect | 19.7     | Detected | 62.8     | Detected   | 10.3     | Not Detect | Tinag         | 1.084210526 | 6.61052632 | 0.52284264 | 3.1878173 |
| A_52_P1026 | 925.1    | Detected   | 1676.1   | Detected | 946.2    | Detected   | 1002.9   | Detected   | Trmt1         | 1.084099016 | 1.02280835 | 0.59835332 | 0.5645248 |
| A_55_P2365 | 89.2     | Detected   | 81.3     | Detected | 84       | Detected   | 96.7     | Detected   | Foxj2         | 1.084080717 | 0.94170404 | 1.18942189 | 1.0332103 |
| A_55_P2172 | 78.5     | Detected   | 40.7     | Detected | 44.1     | Detected   | 85.1     | Detected   | Mettl7a1      | 1.084076433 | 0.56178344 | 2.09090909 | 1.0835381 |
| A_55_P2038 | 103.5    | Detected   | 105.1    | Detected | 95.2     | Detected   | 112.2    | Detected   | Tmco3         | 1.084057971 | 0.91980676 | 1.06755471 | 0.905804  |
| A_52_P2744 | 127.4    | Detected   | 133.1    | Detected | 125.6    | Detected   | 138.1    | Detected   | Atf7          | 1.083987441 | 0.98587127 | 1.03756574 | 0.9436514 |
| A_52_P5248 | 9130.7   | Detected   | 7992.3   | Detected | 7848.5   | Detected   | 9897.3   | Detected   | Eif3a         | 1.083958514 | 0.85957265 | 1.23835442 | 0.9820077 |
| A_51_P1099 | 34647.2  | Detected   | 28910.1  | Detected | 40946.2  | Detected   | 37555.8  | Detected   | Apoa1bp       | 1.083949064 | 1.18180401 | 1.29905466 | 1.4163285 |
| A_55_P2002 | 9176.3   | Detected   | 8223.7   | Detected | 10489.6  | Detected   | 9946.4   | Detected   | Sec11a        | 1.083922714 | 1.14311869 | 1.20947992 | 1.2755329 |
| A_55_P1990 | 23821.8  | Detected   | 22778.9  | Detected | 25458.3  | Detected   | 25820.5  | Detected   | Snrnp70       | 1.08390214  | 1.06869758 | 1.13352708 | 1.1176264 |

|            |          |          |          |          |          |          |          |          |               |             |            |            |           |
|------------|----------|----------|----------|----------|----------|----------|----------|----------|---------------|-------------|------------|------------|-----------|
| A_55_P2039 | 11777.4  | Detected | 14449    | Detected | 13091.8  | Detected | 12764    | Detected | Cmss1         | 1.083770612 | 1.11160358 | 0.88338293 | 0.9060696 |
| A_55_P2147 | 121748.6 | Detected | 109427.4 | Detected | 118953.1 | Detected | 131946.9 | Detected | Prdx1         | 1.083765234 | 0.97703875 | 1.20579398 | 1.0870504 |
| A_66_P1150 | 42596.7  | Detected | 39887.6  | Detected | 40535.9  | Detected | 46164    | Detected | Anp32b        | 1.083745924 | 0.95162067 | 1.15735216 | 1.0162532 |
| A_65_P1299 | 1719.5   | Detected | 1848.6   | Detected | 1178.2   | Detected | 1863.5   | Detected | Kif1b         | 1.083745275 | 0.68519919 | 1.00806015 | 0.6373472 |
| A_55_P1964 | 443139.2 | Detected | 450615.7 | Detected | 434379.8 | Detected | 480222.2 | Detected | Kctd14        | 1.083682509 | 0.9802333  | 1.06570233 | 0.9639695 |
| A_55_P2005 | 11264.6  | Detected | 9674.2   | Detected | 13210.2  | Detected | 12206.9  | Detected | Plcx1         | 1.083651439 | 1.17271807 | 1.26179943 | 1.3655083 |
| A_55_P2097 | 1035.6   | Detected | 1352.9   | Detected | 1325.7   | Detected | 1122.2   | Detected | L2hgdh        | 1.08362302  | 1.28012746 | 0.82947742 | 0.979895  |
| A_55_P2089 | 65.8     | Detected | 38.8     | Detected | 55.5     | Detected | 71.3     | Detected | Slc23a2       | 1.083586626 | 0.84346505 | 1.83762887 | 1.4304124 |
| A_55_P1964 | 257.3    | Detected | 165      | Detected | 282.4    | Detected | 278.8    | Detected | Map1b         | 1.083560047 | 1.0975515  | 1.68969697 | 1.7115152 |
| A_55_P2089 | 6680.3   | Detected | 6212     | Detected | 7184.7   | Detected | 7238.5   | Detected | Wfdc13        | 1.083559122 | 1.07550559 | 1.16524469 | 1.156584  |
| A_52_P4136 | 1563.4   | Detected | 1538     | Detected | 1260     | Detected | 1694     | Detected | Usp22         | 1.083535883 | 0.80593578 | 1.10143043 | 0.8192458 |
| A_55_P2079 | 21659.3  | Detected | 23603.7  | Detected | 20894    | Detected | 23468.6  | Detected | Ptges3        | 1.083534556 | 0.96466645 | 0.99427632 | 0.8852002 |
| A_51_P2605 | 38514.3  | Detected | 41744.6  | Detected | 36437.2  | Detected | 41729.6  | Detected | Polr1d        | 1.083483278 | 0.94606938 | 0.99964067 | 0.8728602 |
| A_55_P2061 | 140192.1 | Detected | 126046.4 | Detected | 165202.7 | Detected | 151888.2 | Detected | Rpl29         | 1.083429095 | 1.17840235 | 1.20501815 | 1.3106499 |
| A_52_P5585 | 2870.4   | Detected | 2227.5   | Detected | 2639.9   | Detected | 3109.4   | Detected | Zfp263        | 1.083263657 | 0.9196976  | 1.3959147  | 1.1851403 |
| A_55_P2059 | 12752.4  | Detected | 10441.9  | Detected | 9830.4   | Detected | 13814.2  | Detected | Mapk8ip3      | 1.083262758 | 0.77086666 | 1.32295847 | 0.9414379 |
| A_51_P2345 | 497.7    | Detected | 364.3    | Detected | 417.2    | Detected | 539.1    | Detected | Nfxl1         | 1.08318264  | 0.83825598 | 1.47982432 | 1.14521   |
| A_55_P2008 | 2439.8   | Detected | 2155     | Detected | 1941.2   | Detected | 2642.7   | Detected | Ppp1r14c      | 1.083162554 | 0.79563899 | 1.2263109  | 0.9007889 |
| A_55_P2126 | 778      | Detected | 506.2    | Detected | 740.3    | Detected | 842.7    | Detected | Tmem25        | 1.083161954 | 0.95154242 | 1.66475701 | 1.4624654 |
| A_51_P4337 | 33007.2  | Detected | 22406.3  | Detected | 30698    | Detected | 35751.1  | Detected | Nucb1         | 1.083130347 | 0.93003951 | 1.59558249 | 1.3700611 |
| A_55_P2002 | 2065.3   | Detected | 1923.8   | Detected | 2306.6   | Detected | 2236.9   | Detected | 4932422M17Rik | 1.083087203 | 1.11683533 | 1.16275081 | 1.1989812 |
| A_51_P1549 | 2559.4   | Detected | 2930.7   | Detected | 3945.5   | Detected | 2771.9   | Detected | Brms1         | 1.083027272 | 1.54157224 | 0.94581499 | 1.3462654 |
| A_51_P1972 | 92988.4  | Detected | 95822.7  | Detected | 108321.7 | Detected | 100708.5 | Detected | Cct7          | 1.083022183 | 1.16489476 | 1.05098792 | 1.1304388 |
| A_55_P2219 | 263.9    | Detected | 261.6    | Detected | 144.9    | Detected | 285.8    | Detected | Usp43         | 1.08298598  | 0.54907162 | 1.09250765 | 0.5538991 |
| A_55_P2081 | 1058.3   | Detected | 1114.1   | Detected | 1059.7   | Detected | 1146     | Detected | Zfp53         | 1.082868752 | 1.00132288 | 1.02863298 | 0.9511713 |
| A_55_P2027 | 148.5    | Detected | 192.3    | Detected | 148.5    | Detected | 160.8    | Detected | Prdm1         | 1.082828283 | 1          | 0.83619345 | 0.7722309 |
| A_52_P2397 | 1766.4   | Detected | 1747.1   | Detected | 1847.3   | Detected | 1912.6   | Detected | Nfyb          | 1.08276721  | 1.04579937 | 1.09472841 | 1.0573522 |
| A_55_P2133 | 201.8    | Detected | 189.7    | Detected | 173.8    | Detected | 218.5    | Detected | D930015E06Rik | 1.082755203 | 0.86124876 | 1.15181866 | 0.9161834 |
| A_55_P2033 | 19862.8  | Detected | 23321.6  | Detected | 25442.2  | Detected | 21504.5  | Detected | Dhrs7b        | 1.082651993 | 1.28089695 | 0.92208511 | 1.0909286 |
| A_55_P1970 | 10410    | Detected | 6366.1   | Detected | 10457.1  | Detected | 11269.8  | Detected | Zer1          | 1.08259366  | 1.0045245  | 1.77028322 | 1.6426226 |
| A_55_P2184 | 246666.6 | Detected | 273728.4 | Detected | 268869.5 | Detected | 267038.4 | Detected | Rps26         | 1.082588401 | 1.09001178 | 0.97555972 | 0.9822492 |
| A_52_P2558 | 4477     | Detected | 4066.3   | Detected | 5316.8   | Detected | 4846.6   | Detected | Dbr1          | 1.082555283 | 1.18758097 | 1.19189435 | 1.3075277 |
| A_51_P1455 | 2281.6   | Detected | 2527.8   | Detected | 3609.3   | Detected | 2469.9   | Detected | Sigirr        | 1.082529804 | 1.5819162  | 0.97709471 | 1.4278424 |
| A_66_P1065 | 55597.2  | Detected | 62936.4  | Detected | 68252.4  | Detected | 60185.6  | Detected | 2010107E04Rik | 1.082529336 | 1.22762297 | 0.95629238 | 1.0844662 |
| A_55_P1971 | 65772.3  | Detected | 36079.8  | Detected | 95210.2  | Detected | 71200.4  | Detected | Sh3glb2       | 1.082528663 | 1.44757291 | 1.97341449 | 2.6388783 |
| A_55_P2186 | 900.8    | Detected | 864.6    | Detected | 729.9    | Detected | 975.1    | Detected | Bard1         | 1.082482238 | 0.81027975 | 1.12780477 | 0.8442054 |
| A_55_P2101 | 11640    | Detected | 12108.7  | Detected | 12399.9  | Detected | 12599.7  | Detected | Aftph         | 1.082448454 | 1.06528351 | 1.04054936 | 1.0240488 |
| A_55_P1960 | 60465.8  | Detected | 61741.5  | Detected | 45999    | Detected | 65450.2  | Detected | Larp1         | 1.082433376 | 0.76074409 | 1.06006819 | 0.7450256 |
| A_55_P2094 | 78.9     | Detected | 73.7     | Detected | 54.7     | Detected | 85.4     | Detected | Gm14137       | 1.082382763 | 0.69328264 | 1.1587517  | 0.7421981 |
| A_55_P1957 | 2859.6   | Detected | 3187.8   | Detected | 3604.6   | Detected | 3095.1   | Detected | Ino80b        | 1.082354175 | 1.26052595 | 0.97092038 | 1.1307485 |

|            |          |            |          |            |          |            |          |            |               |             |            |            |           |
|------------|----------|------------|----------|------------|----------|------------|----------|------------|---------------|-------------|------------|------------|-----------|
| A_51_P4776 | 144.5    | Detected   | 139      | Detected   | 123.9    | Detected   | 156.4    | Detected   | Pitx3         | 1.082352941 | 0.85743945 | 1.12517986 | 0.8913669 |
| A_55_P1959 | 6450.4   | Detected   | 5730     | Detected   | 6942     | Detected   | 6981.5   | Detected   | Oas1b         | 1.082335979 | 1.07621233 | 1.21841187 | 1.2115183 |
| A_52_P1593 | 1012.7   | Detected   | 1373.6   | Detected   | 845.8    | Detected   | 1096     | Detected   | Wdr70         | 1.082255357 | 0.83519305 | 0.79790332 | 0.6157542 |
| A_55_P2049 | 21696.8  | Detected   | 20645.4  | Detected   | 24137.3  | Detected   | 23480.9  | Detected   | Pisd-ps1      | 1.082228716 | 1.11248202 | 1.13734294 | 1.169137  |
| A_51_P4033 | 39364.7  | Detected   | 36102.6  | Detected   | 52228.6  | Detected   | 42601.1  | Detected   | Cuedc2        | 1.082215792 | 1.32678771 | 1.18000089 | 1.4466714 |
| A_55_P2123 | 990.7    | Detected   | 769      | Detected   | 1031.1   | Detected   | 1072     | Detected   | D2hgdh        | 1.082063188 | 1.04077925 | 1.39401821 | 1.3408322 |
| A_55_P1994 | 25.6     | Detected   | 28.4     | Detected   | 17.1     | Not Detect | 27.7     | Not Detect | Sptbn5        | 1.08203125  | 0.66796875 | 0.97535211 | 0.6021127 |
| A_51_P4125 | 146980   | Detected   | 149311.5 | Detected   | 176062.2 | Detected   | 159030.1 | Detected   | Eef1b2        | 1.081984624 | 1.19786502 | 1.06508943 | 1.1791603 |
| A_55_P2348 | 39.1     | Detected   | 23.2     | Detected   | 37.2     | Detected   | 42.3     | Not Detect | 4933413C19Rik | 1.081841432 | 0.95140665 | 1.82327586 | 1.6034483 |
| A_55_P2169 | 183.4    | Detected   | 176.7    | Detected   | 153.3    | Detected   | 198.4    | Detected   | Plod1         | 1.081788441 | 0.83587786 | 1.12280702 | 0.8675722 |
| A_55_P2025 | 172.4    | Detected   | 182.8    | Detected   | 158.7    | Detected   | 186.5    | Detected   | Ccdc169       | 1.081786543 | 0.92053364 | 1.0202407  | 0.8681619 |
| A_55_P2119 | 548      | Detected   | 529.4    | Detected   | 568.8    | Detected   | 592.8    | Detected   | Gstcd         | 1.081751825 | 1.0379562  | 1.11975822 | 1.0744239 |
| A_55_P2134 | 249126.9 | Detected   | 247831.9 | Detected   | 257268.6 | Detected   | 269481.6 | Detected   | Gm13637       | 1.081704144 | 1.03268093 | 1.08735639 | 1.038077  |
| A_52_P5422 | 4150.9   | Detected   | 3051.1   | Detected   | 4177.4   | Detected   | 4490     | Detected   | Pdxdc1        | 1.081693127 | 1.00638416 | 1.47160041 | 1.3691456 |
| A_52_P1161 | 143.3    | Detected   | 126.9    | Detected   | 156.9    | Detected   | 155      | Detected   | Dusp19        | 1.081646895 | 1.09490579 | 1.2214342  | 1.2364066 |
| A_55_P1969 | 583.3    | Detected   | 627.6    | Detected   | 488.8    | Detected   | 630.9    | Detected   | Trappc2       | 1.081604663 | 0.83799074 | 1.00525813 | 0.77884   |
| A_51_P3638 | 1683     | Detected   | 1808.1   | Detected   | 1381     | Detected   | 1820.3   | Detected   | Pgpep1        | 1.081580511 | 0.82055853 | 1.00674741 | 0.7637852 |
| A_51_P5093 | 153.3    | Detected   | 168.3    | Detected   | 146.5    | Detected   | 165.8    | Detected   | Aldh8a1       | 1.081539465 | 0.95564253 | 0.98514557 | 0.8704694 |
| A_51_P4407 | 9404.3   | Detected   | 5334.2   | Detected   | 11501.9  | Detected   | 10171.1  | Detected   | Dpp7          | 1.081537169 | 1.2230469  | 1.9067714  | 2.1562559 |
| A_52_P3049 | 1741.6   | Detected   | 2277     | Detected   | 1346.8   | Detected   | 1883.6   | Detected   | Cenpn         | 1.081534221 | 0.7733119  | 0.82722881 | 0.59148   |
| A_55_P2185 | 198.9    | Detected   | 183.1    | Detected   | 186.5    | Detected   | 215.1    | Detected   | Sirt6         | 1.081447964 | 0.93765711 | 1.17476789 | 1.0185691 |
| A_55_P1970 | 46319.4  | Detected   | 42128.9  | Detected   | 41745.6  | Detected   | 50091.3  | Detected   | Csnk1d        | 1.081432402 | 0.9012552  | 1.1890009  | 0.9909017 |
| A_52_P2415 | 90.9     | Detected   | 111.7    | Detected   | 96.5     | Detected   | 98.3     | Detected   | Zbtb46        | 1.081408141 | 1.06160616 | 0.88003581 | 0.8639212 |
| A_51_P1237 | 14869.7  | Detected   | 15598.6  | Detected   | 22064.9  | Detected   | 16079.8  | Detected   | Zfp637        | 1.081380256 | 1.48388333 | 1.03084892 | 1.4145436 |
| A_55_P1986 | 68047.9  | Detected   | 51769.7  | Detected   | 68541.7  | Detected   | 73582.6  | Detected   | Anapc2        | 1.081335353 | 1.00725665 | 1.42134492 | 1.3239733 |
| A_55_P2038 | 6049.3   | Detected   | 4260.3   | Detected   | 6538.4   | Detected   | 6541.3   | Detected   | Dock11        | 1.081331724 | 1.08085233 | 1.5354083  | 1.5347276 |
| A_55_P2377 | 147.6    | Detected   | 83.8     | Detected   | 101.5    | Detected   | 159.6    | Detected   | Gbf1          | 1.081300813 | 0.68766938 | 1.90453461 | 1.2112172 |
| A_55_P2328 | 50.5     | Detected   | 46.9     | Detected   | 42.5     | Detected   | 54.6     | Not Detect | 4930567K12Rik | 1.081188119 | 0.84158416 | 1.1641791  | 0.9061834 |
| A_55_P2068 | 41.9     | Detected   | 53.7     | Detected   | 11.7     | Not Detect | 45.3     | Not Detect | Ccl27a        | 1.081145585 | 0.27923628 | 0.84357542 | 0.2178771 |
| A_55_P2102 | 30199.5  | Detected   | 28046.7  | Detected   | 35428    | Detected   | 32649.3  | Detected   | Gm12657       | 1.081120548 | 1.17313201 | 1.16410487 | 1.2631789 |
| A_55_P2425 | 1470     | Detected   | 1872.7   | Detected   | 1896     | Detected   | 1589.1   | Detected   | 1200014J11Rik | 1.081020408 | 1.28979592 | 0.8485609  | 1.0124419 |
| A_55_P2027 | 24.7     | Detected   | 24.9     | Detected   | 65.6     | Detected   | 26.7     | Not Detect | Tnnt1         | 1.08097166  | 2.65587045 | 1.07228916 | 2.6345382 |
| A_66_P1328 | 6337.6   | Detected   | 6219.5   | Detected   | 7887.5   | Detected   | 6850.5   | Detected   | Exosc1        | 1.080929689 | 1.2445563  | 1.1014551  | 1.2681888 |
| A_51_P2128 | 4073.7   | Detected   | 3429     | Detected   | 3439.4   | Detected   | 4403.1   | Detected   | Ube2a         | 1.080860152 | 0.84429389 | 1.28407699 | 1.003033  |
| A_51_P2675 | 990.7    | Detected   | 1259.2   | Detected   | 1408.4   | Detected   | 1070.8   | Detected   | 2010012O05Rik | 1.080851923 | 1.42162108 | 0.85038119 | 1.1184879 |
| A_51_P4696 | 9.9      | Not Detect | 13       | Not Detect | 69.8     | Detected   | 10.7     | Not Detect | Syt17         | 1.080808081 | 7.05050505 | 0.82307692 | 5.3692308 |
| A_55_P2154 | 23894.9  | Detected   | 22188.9  | Detected   | 16643.4  | Detected   | 25823.1  | Detected   | Myo18a        | 1.080695044 | 0.6965252  | 1.1637846  | 0.7500777 |
| A_51_P5131 | 24.8     | Detected   | 23.3     | Detected   | 17       | Detected   | 26.8     | Not Detect | Pnmt          | 1.080645161 | 0.68548387 | 1.15021459 | 0.7296137 |
| A_51_P2645 | 12.4     | Not Detect | 13.8     | Not Detect | 26.4     | Detected   | 13.4     | Not Detect | 4933427E11Rik | 1.080645161 | 2.12903226 | 0.97101449 | 1.9130435 |
| A_52_P6592 | 43.4     | Detected   | 51.1     | Detected   | 29.2     | Detected   | 46.9     | Not Detect | Man2a2        | 1.080645161 | 0.67281106 | 0.91780822 | 0.5714286 |



|            |          |          |          |          |          |          |          |            |               |             |            |            |            |           |
|------------|----------|----------|----------|----------|----------|----------|----------|------------|---------------|-------------|------------|------------|------------|-----------|
| A_55_P2106 | 393521.4 | Detected | 430088.3 | Detected | 411940.6 | Detected | 425247.3 | Detected   | LOC100048117  | 1.08062052  | 1.04680609 | 0.98874417 | 0.9578047  |           |
| A_55_P1970 | 20384.9  | Detected | 18706    | Detected | 16894    | Detected | 22028    | Detected   | Rnf10         | 1.08060378  | 0.82875069 | 1.17759008 | 0.9031327  |           |
| A_51_P1813 | 127.8    | Detected | 113.3    | Detected | 265      | Detected | 138.1    | Detected   | Necab2        | 1.080594679 | 2.07355243 | 1.21888791 | 2.3389232  |           |
| A_51_P4017 | 1280.5   | Detected | 1386.5   | Detected | 1300     | Detected | 1383.7   | Detected   | Mettl2        | 1.080593518 | 1.01522843 | 0.99798053 | 0.9376127  |           |
| A_55_P2079 | 3137     | Detected | 2828.4   | Detected | 3264.9   | Detected | 3389.8   | Detected   | Map3k5        | 1.080586548 | 1.04077144 | 1.19848678 | 1.1543275  |           |
| A_55_P1952 | 1174.9   | Detected | 1237.2   | Detected | 1130.7   | Detected | 1269.5   | Detected   | 2810403A07Rik | 1.080517491 | 0.96237978 | 1.02610734 | 0.9139185  |           |
| A_55_P2017 | 915.8    | Detected | 732.1    | Detected | 1129.2   | Detected | 989.5    | Detected   | Zfp54         | 1.080476086 | 1.23302031 | 1.35159131 | 1.5424122  |           |
| A_51_P2598 | 23474.7  | Detected | 19310.7  | Detected | 17906.1  | Detected | 25363.7  | Detected   | Mettl9        | 1.080469612 | 0.76278291 | 1.31345316 | 0.9272631  |           |
| A_55_P2353 | 513.3    | Detected | 515.3    | Detected | 529.6    | Detected | 554.6    | Detected   | Pitpnm2os1    | 1.08045977  | 1.03175531 | 1.07626625 | 1.0277508  |           |
| A_55_P2007 | 103.2    | Detected | 112      | Detected | 122.3    | Detected | 111.5    | Detected   | Tuba3b        | 1.080426357 | 1.18507752 | 0.99553571 | 1.0919643  |           |
| A_51_P4658 | 508.7    | Detected | 424.6    | Detected | 419.8    | Detected | 549.6    | Detected   | Slc30a9       | 1.080401022 | 0.82524081 | 1.29439472 | 0.9886952  |           |
| A_66_P1050 | 31.1     | Detected | 40.3     | Detected | 37.7     | Detected | 33.6     | Not Detect | Gm13889       | 1.080385852 | 1.21221865 | 0.8337469  | 0.9354839  |           |
| A_55_P1964 | 11889.9  | Detected | 12798.8  | Detected | 13594.7  | Detected | 12845.5  | Detected   | Gm9731        | 1.080370735 | 1.1433822  | 1.00364878 | 1.0621855  |           |
| A_52_P1984 | 6392.2   | Detected | 5640.1   | Detected | 5766.1   | Detected | 6905.9   | Detected   | Rasgrp3       | 1.080363568 | 0.9020525  | 1.22442864 | 1.02234    |           |
| A_51_P3718 | 13783.4  | Detected | 11263.8  | Detected | 16654.4  | Detected | 14890.8  | Detected   | Ccdc71        | 1.080343021 | 1.20829403 | 1.32200501 | 1.4785774  |           |
| A_55_P2023 | 416.1    | Detected | 293.6    | Detected | 375.3    | Detected | 449.5    | Detected   | Dnajb2        | 1.080269166 | 0.90194665 | 1.53099455 | 1.2782698  |           |
| A_55_P2015 | 164470.9 | Detected | 152240.6 | Detected | 140004.1 | Detected | 177658.3 | Detected   | Gm10856       | 1.080180749 | 0.85123934 | 1.16695743 | 0.9196239  |           |
| A_55_P1970 | 44.9     | Detected | 46.4     | Detected | 41.5     | Detected | 48.5     | Not Detect | Tex28         | 1.080178174 | 0.92427617 | 1.04525862 | 0.8943966  |           |
| A_51_P3459 | 2776.6   | Detected | 2385.4   | Detected | 2353.3   | Detected | 2999.2   | Detected   | Ddx41         | 1.080169992 | 0.84754736 | 1.25731533 | 0.9865431  |           |
| A_66_P1114 | 1130.3   | Detected | 1080.6   | Detected | 1042.6   | Detected | 1220.9   | Detected   | Lce1a2        | 1.080155711 | 0.92240998 | 1.12983528 | 0.9648344  |           |
| A_52_P2784 | 6765.1   | Detected | 6861.3   | Detected | 7291.7   | Detected | 7307.1   | Detected   | Eif4ebp3      | 1.080117071 | 1.07784068 | 1.06497311 | 1.0627286  |           |
| A_55_P2125 | 445.6    | Detected | 322      | Detected | 644.6    | Detected | 481.3    | Detected   | Acbd5         | 1.080116697 | 1.44658887 | 1.4947205  | 2.0018634  |           |
| A_52_P7837 | 61.2     | Detected | 142.7    | Detected | 65.2     | Detected | 66.1     | Detected   | Sorbs3        | 1.080065359 | 1.06535948 | 0.46320953 | 0.4569026  |           |
| A_51_P1077 | 3222.6   | Detected | 2580.8   | Detected | 3721.4   | Detected | 3480.6   | Detected   | Kdsr          | 1.080059579 | 1.15478185 | 1.34865158 | 1.441956   |           |
| A_51_P2405 | 5405.1   | Detected | 6790.4   | Detected | 5829.8   | Detected | 5837.8   | Detected   | Zfp7          | 1.080054023 | 1.07857394 | 0.85971371 | 0.8585356  |           |
| A_55_P1978 | 4196.6   | Detected | 2959.6   | Detected | 5609.5   | Detected | 4532.5   | Detected   | Ppip5k2       | 1.080040986 | 1.33667731 | 1.53145695 | 1.8953575  |           |
| A_55_P2019 | 814.6    | Detected | 899.9    | Detected | 984.9    | Detected | 879.8    | Detected   | Ythdf3        | 1.080039283 | 1.20905966 | 0.97766418 | 1.0944549  |           |
| A_51_P1101 | 632.2    | Detected | 381.2    | Detected | 580.3    | Detected | 682.8    | Detected   | Ttyh2         | 1.080037963 | 0.91790573 | 1.79118573 | 1.522298   |           |
| A_55_P1975 | 30       | Detected | 33.9     | Detected | 29.4     | Detected | 32.4     | Not Detect | Pdia6         | 1.080037963 | 1.08       | 0.98       | 0.95575221 | 0.8672566 |
| A_52_P1369 | 339      | Detected | 848.9    | Detected | 191.6    | Detected | 366.1    | Detected   | Nudt7         | 1.079941003 | 0.56519174 | 0.43126399 | 0.2257039  |           |
| A_55_P2422 | 110.1    | Detected | 106.1    | Detected | 76.8     | Detected | 118.9    | Detected   | BC025933      | 1.079927339 | 0.69754768 | 1.1206409  | 0.7238454  |           |
| A_51_P3863 | 8843.1   | Detected | 8061     | Detected | 7086.6   | Detected | 9549.1   | Detected   | Ccnl2         | 1.079836257 | 0.80137056 | 1.18460489 | 0.8791217  |           |
| A_55_P2232 | 71.4     | Detected | 67.6     | Detected | 96.8     | Detected | 77.1     | Detected   | Scube2        | 1.079831933 | 1.3557423  | 1.14053254 | 1.4319527  |           |
| A_55_P1970 | 26227.3  | Detected | 23254.7  | Detected | 24022.3  | Detected | 28319.1  | Detected   | Timm17b       | 1.07975659  | 0.9159273  | 1.21777963 | 1.0330084  |           |
| A_55_P2084 | 536.7    | Detected | 427      | Detected | 644.6    | Detected | 579.5    | Detected   | Hist1h2aa     | 1.0797466   | 1.20104341 | 1.35714286 | 1.5096019  |           |
| A_55_P1985 | 338850.4 | Detected | 339862.1 | Detected | 330198.8 | Detected | 365871.2 | Detected   | BC028528      | 1.079742565 | 0.97446779 | 1.07652839 | 0.971567   |           |
| A_66_P1304 | 2706.8   | Detected | 2571.7   | Detected | 3373.4   | Detected | 2922.6   | Detected   | Rce1          | 1.079725137 | 1.24626866 | 1.13644671 | 1.3117393  |           |
| A_55_P1965 | 190382.8 | Detected | 217453.4 | Detected | 232821.2 | Detected | 205557.6 | Detected   | Rpl8          | 1.07970678  | 1.22291089 | 0.94529495 | 1.0706717  |           |
| A_55_P1984 | 41927.4  | Detected | 33279.8  | Detected | 39726.5  | Detected | 45269    | Detected   | Nup62         | 1.079699671 | 0.94750688 | 1.36025457 | 1.1937121  |           |
| A_55_P2061 | 113841.8 | Detected | 93145    | Detected | 113896.5 | Detected | 122899.7 | Detected   | Prelid1       | 1.079565678 | 1.00048049 | 1.31944495 | 1.2227871  |           |

|            |                   |                   |                   |                   |               |             |            |            |           |
|------------|-------------------|-------------------|-------------------|-------------------|---------------|-------------|------------|------------|-----------|
| A_55_P2070 | 17.6 Detected     | 19.4 Detected     | 20 Detected       | 19 Not Detect     | Cxxc4         | 1.079545455 | 1.13636364 | 0.97938144 | 1.0309278 |
| A_55_P2009 | 104.4 Detected    | 110.1 Detected    | 81.9 Detected     | 112.7 Detected    | Pde7a         | 1.079501916 | 0.78448276 | 1.0236149  | 0.7438692 |
| A_55_P2003 | 6406.3 Detected   | 6185.9 Detected   | 5894.8 Detected   | 6915.2 Detected   | Mtmr12        | 1.079437429 | 0.92015672 | 1.11789715 | 0.9529414 |
| A_55_P1972 | 264.6 Detected    | 230 Detected      | 207.8 Detected    | 285.6 Detected    | Txlng         | 1.079365079 | 0.78533636 | 1.24173913 | 0.9034783 |
| A_55_P1978 | 81190.8 Detected  | 95092.9 Detected  | 110711.9 Detected | 87634.1 Detected  | Erh           | 1.079359977 | 1.36360154 | 0.92156302 | 1.1642499 |
| A_55_P2041 | 385.3 Detected    | 454.8 Detected    | 390.6 Detected    | 415.8 Detected    | Gna13         | 1.079159097 | 1.01375552 | 0.91424802 | 0.8588391 |
| A_52_P1680 | 1229.2 Detected   | 1249.8 Detected   | 1213.1 Detected   | 1326.5 Detected   | Atp2a2        | 1.079157175 | 0.98690205 | 1.06136982 | 0.9706353 |
| A_52_P2252 | 4744.2 Detected   | 4911.1 Detected   | 5063.8 Detected   | 5119.1 Detected   | Ywhaz         | 1.079022807 | 1.06736647 | 1.04235304 | 1.0310928 |
| A_55_P2058 | 146.8 Detected    | 173.5 Detected    | 161.5 Detected    | 158.4 Detected    | Gphb5         | 1.079019074 | 1.10013624 | 0.9129683  | 0.9308357 |
| A_55_P2351 | 303.8 Detected    | 237 Detected      | 361.4 Detected    | 327.8 Detected    | 1700112J16Rik | 1.078999342 | 1.18959842 | 1.38312236 | 1.5248945 |
| A_51_P2681 | 855 Detected      | 845.7 Detected    | 730.7 Detected    | 922.5 Detected    | D14Abb1e      | 1.078947368 | 0.85461988 | 1.09081234 | 0.864018  |
| A_55_P2143 | 4421.9 Detected   | 3457 Detected     | 7373.2 Detected   | 4770.6 Detected   | Rpp21         | 1.078857505 | 1.66742803 | 1.37998264 | 2.1328319 |
| A_55_P2136 | 11579.9 Detected  | 10210.8 Detected  | 12470.4 Detected  | 12492.9 Detected  | Cisd3         | 1.078843513 | 1.07690049 | 1.22349865 | 1.2212951 |
| A_52_P1367 | 566 Detected      | 482.6 Detected    | 273.4 Detected    | 610.6 Detected    | Dtnb          | 1.078798587 | 0.48303887 | 1.26523    | 0.5665147 |
| A_52_P4575 | 120.6 Detected    | 113 Detected      | 103.5 Detected    | 130.1 Detected    | Fbxw21        | 1.078772803 | 0.85820896 | 1.15132743 | 0.9159292 |
| A_51_P2469 | 80093.4 Detected  | 79263.5 Detected  | 95032.1 Detected  | 86393.9 Detected  | Rps27l        | 1.078664409 | 1.18651599 | 1.08995818 | 1.198939  |
| A_51_P1775 | 21142.4 Detected  | 22860.1 Detected  | 23592 Detected    | 22805.3 Detected  | Puf60         | 1.078652376 | 1.11586196 | 0.99760281 | 1.0320165 |
| A_51_P2089 | 8453.5 Detected   | 8965 Detected     | 10920.9 Detected  | 9118.3 Detected   | N4bp3         | 1.078641983 | 1.2918791  | 1.01709983 | 1.2181707 |
| A_55_P2090 | 259325.7 Detected | 251821.7 Detected | 283092.5 Detected | 279698.6 Detected | Tpm3          | 1.078561053 | 1.09164846 | 1.11070094 | 1.1241783 |
| A_51_P1792 | 11778.5 Detected  | 9664.7 Detected   | 11409 Detected    | 12702.8 Detected  | Tssc4         | 1.07847349  | 0.96862928 | 1.31435016 | 1.1804815 |
| A_65_P0719 | 249554.5 Detected | 254409.8 Detected | 241779.3 Detected | 269133.8 Detected | COX3          | 1.07845701  | 0.96884368 | 1.05787513 | 0.9503537 |
| A_55_P1958 | 20396.7 Detected  | 18894.6 Detected  | 18721.5 Detected  | 21995.6 Detected  | Thrap3        | 1.078390132 | 0.91786907 | 1.16412097 | 0.9908387 |
| A_51_P3095 | 6436.4 Detected   | 4422.7 Detected   | 6009.6 Detected   | 6940.9 Detected   | Praf2         | 1.078382326 | 0.93368964 | 1.5693807  | 1.358808  |
| A_55_P2158 | 247896.2 Detected | 263295.4 Detected | 297694.6 Detected | 267315.7 Detected | Rps27         | 1.078337223 | 1.20088408 | 1.01526916 | 1.1306487 |
| A_52_P1072 | 1255.6 Detected   | 1527.7 Detected   | 1206.1 Detected   | 1353.9 Detected   | Prpf39        | 1.078289264 | 0.96057662 | 0.88623421 | 0.7894875 |
| A_51_P1708 | 2837.3 Detected   | 2308.2 Detected   | 1957.6 Detected   | 3059.4 Detected   | Map3k6        | 1.078278645 | 0.68995171 | 1.3254484  | 0.8481067 |
| A_52_P6978 | 4061.4 Detected   | 4142.8 Detected   | 5241.5 Detected   | 4379.1 Detected   | Exosc1        | 1.078224258 | 1.29056483 | 1.05703872 | 1.2652071 |
| A_55_P2167 | 727.7 Detected    | 710.7 Detected    | 831.4 Detected    | 784.6 Detected    | Gm10451       | 1.078191562 | 1.14250378 | 1.10398199 | 1.1698326 |
| A_51_P3739 | 24.3 Detected     | 29.6 Detected     | 29 Detected       | 26.2 Not Detect   | Rsph1         | 1.0781893   | 1.19341564 | 0.88513514 | 0.9797297 |
| A_55_P1973 | 4279.8 Detected   | 5198.1 Detected   | 3083.9 Detected   | 4614.4 Detected   | Tax1bp3       | 1.078181223 | 0.72057105 | 0.88770897 | 0.5932745 |
| A_55_P1993 | 19.2 Detected     | 29.5 Detected     | 21.6 Detected     | 20.7 Not Detect   | Acsbg2        | 1.078125    | 1.125      | 0.70169492 | 0.7322034 |
| A_52_P2827 | 5573.8 Detected   | 4123.1 Detected   | 5503.4 Detected   | 6008.9 Detected   | Myd88         | 1.078061646 | 0.98736948 | 1.45737431 | 1.3347724 |
| A_55_P2044 | 61.5 Detected     | 63.3 Detected     | 65.9 Detected     | 66.3 Detected     | Tbc1d32       | 1.07804878  | 1.07154472 | 1.04739336 | 1.0410742 |
| A_51_P2014 | 7537.5 Detected   | 6560.8 Detected   | 5808 Detected     | 8124.3 Detected   | Stat3         | 1.077850746 | 0.77054726 | 1.23830935 | 0.8852579 |
| A_51_P4628 | 1414.7 Detected   | 1267.4 Detected   | 1619.8 Detected   | 1524.8 Detected   | Sars2         | 1.077825687 | 1.14497773 | 1.20309295 | 1.2780496 |
| A_55_P2153 | 1662.7 Detected   | 1527.3 Detected   | 1551.3 Detected   | 1792 Detected     | Enho          | 1.077765081 | 0.93300054 | 1.17331238 | 1.015714  |
| A_51_P3930 | 2466.5 Detected   | 1943.4 Detected   | 1899.3 Detected   | 2658.3 Detected   | Ap4m1         | 1.077762011 | 0.77003852 | 1.36786045 | 0.9773078 |
| A_55_P2056 | 18730.1 Detected  | 21477.9 Detected  | 14794.6 Detected  | 20184 Detected    | Bcar1         | 1.077623718 | 0.78988366 | 0.93975668 | 0.688829  |
| A_55_P1989 | 32698.2 Detected  | 27781.2 Detected  | 36832.6 Detected  | 35234.7 Detected  | Nenf          | 1.077573077 | 1.12644121 | 1.26829295 | 1.3258103 |
| A_65_P0178 | 6465.2 Detected   | 6427.1 Detected   | 6030.2 Detected   | 6966.3 Detected   | Med28         | 1.07750727  | 0.9327167  | 1.08389476 | 0.9382459 |

|            |          |            |          |            |          |            |          |            |               |             |            |            |           |
|------------|----------|------------|----------|------------|----------|------------|----------|------------|---------------|-------------|------------|------------|-----------|
| A_55_P2041 | 13391.4  | Detected   | 12317    | Detected   | 14651.8  | Detected   | 14428.3  | Detected   | 1110004F10Rik | 1.077430291 | 1.09412011 | 1.17141349 | 1.1895591 |
| A_66_P1045 | 16.8     | Detected   | 15       | Not Detect | 4.8      | Not Detect | 18.1     | Not Detect | 4932413F04Rik | 1.077380952 | 0.28571429 | 1.20666667 | 0.32      |
| A_55_P1981 | 1265.8   | Detected   | 1112     | Detected   | 1183.1   | Detected   | 1363.5   | Detected   | Ercc6l2       | 1.077184389 | 0.93466582 | 1.22616906 | 1.0639388 |
| A_55_P1996 | 360.2    | Detected   | 287.4    | Detected   | 233.7    | Detected   | 388      | Detected   | Rasa3         | 1.077179345 | 0.64880622 | 1.35003479 | 0.8131524 |
| A_55_P2064 | 960.5    | Detected   | 871.5    | Detected   | 1588     | Detected   | 1034.5   | Detected   | Pcmdt2        | 1.077043207 | 1.65330557 | 1.18703385 | 1.8221457 |
| A_66_P1064 | 1763.2   | Detected   | 1511.4   | Detected   | 1726.4   | Detected   | 1899     | Detected   | Prkacb        | 1.077019056 | 0.97912886 | 1.25645097 | 1.1422522 |
| A_55_P2444 | 1943.4   | Detected   | 1315.3   | Detected   | 979.3    | Detected   | 2093     | Detected   | Akap2         | 1.076978491 | 0.50391067 | 1.59127195 | 0.744545  |
| A_52_P9788 | 9.1      | Not Detect | 35.3     | Detected   | 5.6      | Not Detect | 9.8      | Not Detect | B4galnt4      | 1.076923077 | 0.61538462 | 0.2776204  | 0.1586402 |
| A_52_P6253 | 475.1    | Detected   | 416.6    | Detected   | 461.7    | Detected   | 511.6    | Detected   | Sc1t1         | 1.076825931 | 0.97179541 | 1.22803649 | 1.1082573 |
| A_55_P2137 | 4266.2   | Detected   | 3919.7   | Detected   | 5070.8   | Detected   | 4593.8   | Detected   | Fxyd1         | 1.076789649 | 1.18859875 | 1.17197745 | 1.2936704 |
| A_55_P2176 | 125.1    | Detected   | 403.3    | Detected   | 21.2     | Detected   | 134.7    | Detected   | Mitf          | 1.076738609 | 0.16946443 | 0.33399455 | 0.0525663 |
| A_51_P4607 | 3010.5   | Detected   | 2691     | Detected   | 2946     | Detected   | 3241.5   | Detected   | Tdrd3         | 1.07673144  | 0.97857499 | 1.20457079 | 1.0947603 |
| A_52_P5831 | 6443.6   | Detected   | 7219.7   | Detected   | 5707     | Detected   | 6937.7   | Detected   | Ykt6          | 1.076680737 | 0.88568502 | 0.96094021 | 0.7904761 |
| A_55_P1989 | 71.8     | Detected   | 67.7     | Detected   | 79.2     | Detected   | 77.3     | Detected   | Fndc1         | 1.076601671 | 1.10306407 | 1.14180207 | 1.1698671 |
| A_55_P2044 | 69.2     | Detected   | 61.9     | Detected   | 73.9     | Detected   | 74.5     | Detected   | Sorcs1        | 1.076589595 | 1.06791908 | 1.20355412 | 1.1938611 |
| A_55_P2038 | 67965.2  | Detected   | 59887.9  | Detected   | 83852.8  | Detected   | 73168.6  | Detected   | Csrp1         | 1.076559769 | 1.23376081 | 1.22175932 | 1.4001626 |
| A_55_P2044 | 12851.7  | Detected   | 12230.7  | Detected   | 11702.6  | Detected   | 13835.5  | Detected   | Rxrg          | 1.076550184 | 0.9105877  | 1.13121081 | 0.9568218 |
| A_55_P2016 | 6286.8   | Detected   | 5538.1   | Detected   | 5044.6   | Detected   | 6767.6   | Detected   | Lce1a2        | 1.076477699 | 0.8024114  | 1.22200755 | 0.91089   |
| A_66_P1207 | 7723     | Detected   | 7604.7   | Detected   | 8255.7   | Detected   | 8313.3   | Detected   | Ywhaz         | 1.076434028 | 1.06897579 | 1.09317922 | 1.085605  |
| A_55_P2092 | 22056.2  | Detected   | 18634.7  | Detected   | 30413.6  | Detected   | 23742    | Detected   | Traf2         | 1.076432024 | 1.37891387 | 1.27407471 | 1.632095  |
| A_55_P2142 | 959.1    | Detected   | 818      | Detected   | 897      | Detected   | 1032.4   | Detected   | Gm16441       | 1.076425816 | 0.9352518  | 1.26210269 | 1.096577  |
| A_51_P3353 | 4316.3   | Detected   | 3658.5   | Detected   | 4312.1   | Detected   | 4646.1   | Detected   | Ppm1a         | 1.076408035 | 0.99902694 | 1.2699467  | 1.1786525 |
| A_55_P1985 | 250.2    | Detected   | 207.5    | Detected   | 243.5    | Detected   | 269.3    | Detected   | Bhlha9        | 1.076338929 | 0.97322142 | 1.29783133 | 1.173494  |
| A_55_P1985 | 1234.2   | Detected   | 1279.8   | Detected   | 8.6      | Not Detect | 1328.4   | Detected   | Slc35f2       | 1.076324745 | 0.00696808 | 1.03797468 | 0.0067198 |
| A_52_P1421 | 508.5    | Detected   | 465.5    | Detected   | 665.3    | Detected   | 547.3    | Detected   | Aph1b         | 1.076302852 | 1.30835792 | 1.17572503 | 1.4292159 |
| A_55_P1963 | 349950.2 | Detected   | 385442   | Detected   | 374232.8 | Detected   | 376648.1 | Detected   | Rps12         | 1.076290569 | 1.06938873 | 0.97718489 | 0.9709186 |
| A_52_P4134 | 2434.1   | Detected   | 2086.8   | Detected   | 2245.5   | Detected   | 2619.7   | Detected   | Ldlrap1       | 1.076249949 | 0.92251756 | 1.25536707 | 1.0760495 |
| A_55_P2061 | 1081.1   | Detected   | 1063.1   | Detected   | 988.6    | Detected   | 1163.5   | Detected   | Cdc27         | 1.076218666 | 0.914439   | 1.09444079 | 0.9299219 |
| A_51_P3002 | 1907.8   | Detected   | 1564.5   | Detected   | 2103.2   | Detected   | 2053.2   | Detected   | Srek1ip1      | 1.07621344  | 1.10242164 | 1.31236817 | 1.3443273 |
| A_55_P2160 | 30.2     | Detected   | 27.4     | Detected   | 30       | Detected   | 32.5     | Not Detect | Tcp10b        | 1.07615894  | 0.99337748 | 1.18613139 | 1.0948905 |
| A_55_P2212 | 47.3     | Detected   | 30.9     | Detected   | 24.7     | Detected   | 50.9     | Detected   | LOC548102     | 1.076109937 | 0.52219873 | 1.64724919 | 0.7993528 |
| A_51_P1103 | 6863.5   | Detected   | 5338     | Detected   | 6484.2   | Detected   | 7385.8   | Detected   | Setd2         | 1.076098201 | 0.94473665 | 1.38362683 | 1.2147246 |
| A_55_P1955 | 125243.8 | Detected   | 139871.7 | Detected   | 120327.3 | Detected   | 134774.5 | Detected   | Rps6          | 1.07609718  | 0.96074456 | 0.96355803 | 0.8602691 |
| A_55_P1974 | 55931.6  | Detected   | 65391.9  | Detected   | 67967.5  | Detected   | 60186.4  | Detected   | Ndufs7        | 1.076071487 | 1.21518962 | 0.92039534 | 1.0393871 |
| A_52_P3755 | 81.6     | Detected   | 96.5     | Detected   | 57.8     | Detected   | 87.8     | Detected   | Lrrc46        | 1.075980392 | 0.70833333 | 0.90984456 | 0.5989637 |
| A_55_P1959 | 6523.7   | Detected   | 5282     | Detected   | 6128.2   | Detected   | 7019.1   | Detected   | Usp32         | 1.075938501 | 0.93937489 | 1.32887164 | 1.1602045 |
| A_51_P2244 | 2379     | Detected   | 2580.9   | Detected   | 2661.1   | Detected   | 2559.5   | Detected   | Gpn3          | 1.075872215 | 1.11857923 | 0.99170832 | 1.0310744 |
| A_55_P2145 | 358575.6 | Detected   | 389527.4 | Detected   | 373622.3 | Detected   | 385771.8 | Detected   | Tpt1          | 1.075845094 | 1.04196242 | 0.99035857 | 0.9591682 |
| A_55_P2072 | 62727.6  | Detected   | 48818    | Detected   | 63892.5  | Detected   | 67484.1  | Detected   | Sptan1        | 1.075827865 | 1.01857077 | 1.38236101 | 1.3087898 |
| A_55_P2179 | 590.9    | Detected   | 565.1    | Detected   | 472.4    | Detected   | 635.7    | Detected   | Spsb1         | 1.075816551 | 0.79945845 | 1.12493364 | 0.8359582 |

|            |          |          |          |          |          |            |          |            |               |             |            |            |           |
|------------|----------|----------|----------|----------|----------|------------|----------|------------|---------------|-------------|------------|------------|-----------|
| A_55_P2009 | 9257.2   | Detected | 8450.5   | Detected | 8991.8   | Detected   | 9959     | Detected   | Mad111        | 1.07581126  | 0.97133042 | 1.17851015 | 1.0640554 |
| A_55_P2176 | 31.7     | Detected | 27.9     | Detected | 28.6     | Detected   | 34.1     | Not Detect | Pdzd9         | 1.075709779 | 0.9022082  | 1.22222222 | 1.0250896 |
| A_51_P3156 | 1871.3   | Detected | 1610.6   | Detected | 1663.5   | Detected   | 2012.9   | Detected   | Usp11         | 1.075669321 | 0.8889542  | 1.24978269 | 1.0328449 |
| A_55_P2019 | 20690.1  | Detected | 20360.3  | Detected | 18612.5  | Detected   | 22254.5  | Detected   | Acaca         | 1.075611041 | 0.89958483 | 1.09303399 | 0.9141565 |
| A_55_P2020 | 45420.6  | Detected | 43143.2  | Detected | 45230.9  | Detected   | 48854.5  | Detected   | Chd4          | 1.07560226  | 0.99582348 | 1.13238007 | 1.04839   |
| A_55_P2106 | 388963.9 | Detected | 420643.8 | Detected | 394365.1 | Detected   | 418370.4 | Detected   | Gm5523        | 1.075602132 | 1.01388612 | 0.99459543 | 0.9375274 |
| A_51_P2169 | 1923.9   | Detected | 1884.4   | Detected | 2503.5   | Detected   | 2069.3   | Detected   | Ddx59         | 1.075575654 | 1.30126306 | 1.09812142 | 1.3285396 |
| A_52_P4043 | 1977.2   | Detected | 1517.3   | Detected | 1644.8   | Detected   | 2126.3   | Detected   | Cdc42bpb      | 1.07540967  | 0.83188347 | 1.40137086 | 1.0840308 |
| A_55_P2128 | 708.3    | Detected | 856.4    | Detected | 520.5    | Detected   | 761.7    | Detected   | Uggt1         | 1.075391783 | 0.73485811 | 0.88942083 | 0.6077767 |
| A_52_P4502 | 18.6     | Detected | 20.7     | Detected | 22.8     | Detected   | 20       | Not Detect | Spata1        | 1.075268817 | 1.22580645 | 0.96618357 | 1.1014493 |
| A_55_P2024 | 163.5    | Detected | 158.6    | Detected | 140      | Detected   | 175.8    | Detected   | Nus1          | 1.075229358 | 0.85626911 | 1.10844893 | 0.8827238 |
| A_52_P6567 | 715.2    | Detected | 615.1    | Detected | 890.8    | Detected   | 769      | Detected   | Map3k5        | 1.075223714 | 1.24552573 | 1.25020322 | 1.4482198 |
| A_51_P1166 | 59.9     | Detected | 53.1     | Detected | 48.1     | Detected   | 64.4     | Detected   | 1700010114Rik | 1.075125209 | 0.80300501 | 1.21280603 | 0.905838  |
| A_51_P4174 | 50469.1  | Detected | 47655    | Detected | 70842.3  | Detected   | 54260.1  | Detected   | Rnaseh2c      | 1.075115269 | 1.40367671 | 1.13860246 | 1.4865659 |
| A_55_P2160 | 176677.3 | Detected | 180916   | Detected | 177895.2 | Detected   | 189941.3 | Detected   | LOC101055815  | 1.075074727 | 1.00689336 | 1.04988669 | 0.9833027 |
| A_52_P2562 | 684.8    | Detected | 631.2    | Detected | 832.4    | Detected   | 736.2    | Detected   | Zbtb11        | 1.075058411 | 1.21553738 | 1.16634981 | 1.3187579 |
| A_55_P2064 | 28256.8  | Detected | 26096.7  | Detected | 31713.3  | Detected   | 30376.4  | Detected   | Arpc3         | 1.075012033 | 1.12232454 | 1.16399391 | 1.2152226 |
| A_55_P2048 | 13661    | Detected | 10872.8  | Detected | 11366.2  | Detected   | 14685.4  | Detected   | Gm6578        | 1.07498719  | 0.83201815 | 1.35065485 | 1.0453793 |
| A_55_P2035 | 6324.7   | Detected | 6207.3   | Detected | 7007     | Detected   | 6798.5   | Detected   | Pcdh1         | 1.074912644 | 1.10787863 | 1.0952427  | 1.1288322 |
| A_51_P2795 | 8529     | Detected | 6350.4   | Detected | 7545.4   | Detected   | 9167.9   | Detected   | Syap1         | 1.074909134 | 0.88467581 | 1.44367284 | 1.1881771 |
| A_51_P1582 | 22.7     | Detected | 26.8     | Detected | 31.7     | Detected   | 24.4     | Not Detect | Vmn1r199      | 1.074889868 | 1.39647577 | 0.91044776 | 1.1828358 |
| A_55_P2155 | 112596.7 | Detected | 124945.8 | Detected | 113031.1 | Detected   | 121023.3 | Detected   | Sec61g        | 1.074838783 | 1.00385802 | 0.96860639 | 0.9046411 |
| A_51_P1483 | 4495.4   | Detected | 4260.6   | Detected | 3615.8   | Detected   | 4831.8   | Detected   | Chic2         | 1.074832051 | 0.80433332 | 1.13406562 | 0.8486598 |
| A_55_P2055 | 17334.5  | Detected | 16929.4  | Detected | 17440.5  | Detected   | 18631.3  | Detected   | Slc15a4       | 1.074810349 | 1.00611497 | 1.10052926 | 1.0301901 |
| A_51_P3637 | 518.8    | Detected | 522.6    | Detected | 416.3    | Detected   | 557.6    | Detected   | Mcm3ap        | 1.074787972 | 0.80242868 | 1.06697283 | 0.796594  |
| A_51_P1278 | 4139.1   | Detected | 3600.4   | Detected | 5699.5   | Detected   | 4448.5   | Detected   | Pdss1         | 1.07475055  | 1.37699017 | 1.23555716 | 1.5830186 |
| A_51_P4463 | 3790.2   | Detected | 3917.4   | Detected | 4632.1   | Detected   | 4073.5   | Detected   | Cdc37i1       | 1.074745396 | 1.22212548 | 1.03984786 | 1.1824424 |
| A_51_P3653 | 22545.1  | Detected | 26142.4  | Detected | 21464.3  | Detected   | 24230.2  | Detected   | Smg5          | 1.074743514 | 0.95206054 | 0.92685446 | 0.8210532 |
| A_51_P2150 | 119.1    | Detected | 143.5    | Detected | 102      | Detected   | 128      | Detected   | Tmem59l       | 1.07472712  | 0.85642317 | 0.89198606 | 0.7108014 |
| A_55_P1977 | 13550.1  | Detected | 11295.9  | Detected | 12886.3  | Detected   | 14561.7  | Detected   | Mapk1         | 1.074656276 | 0.95101143 | 1.28911375 | 1.1407944 |
| A_55_P2295 | 214.6    | Detected | 97.2     | Detected | 154      | Detected   | 230.6    | Detected   | Fam63b        | 1.074557316 | 0.71761417 | 2.37242798 | 1.5843621 |
| A_51_P4624 | 86043.3  | Detected | 80005.6  | Detected | 111560.9 | Detected   | 92458.2  | Detected   | Gpx4          | 1.074554323 | 1.29656696 | 1.1556466  | 1.3944136 |
| A_55_P2106 | 460573.6 | Detected | 474335.7 | Detected | 439515.9 | Detected   | 494899.7 | Detected   | Glrx2         | 1.074529022 | 0.9542794  | 1.04335326 | 0.9265925 |
| A_51_P1168 | 7053.5   | Detected | 6654     | Detected | 8788     | Detected   | 7578.3   | Detected   | Cyp17a1       | 1.074402779 | 1.24590629 | 1.13890893 | 1.3207093 |
| A_55_P2017 | 7467.3   | Detected | 6519.2   | Detected | 7146.8   | Detected   | 8022.3   | Detected   | Eapp          | 1.074324053 | 0.95707953 | 1.2305651  | 1.0962695 |
| A_55_P2085 | 28.3     | Detected | 30.8     | Detected | 18.6     | Not Detect | 30.4     | Not Detect | Traf7         | 1.074204947 | 0.65724382 | 0.98701299 | 0.6038961 |
| A_55_P2087 | 42197.3  | Detected | 46225.1  | Detected | 37288.2  | Detected   | 45328.2  | Detected   | Gm5506        | 1.07419669  | 0.88366317 | 0.98059712 | 0.8066656 |
| A_51_P4732 | 1326.9   | Detected | 1311.8   | Detected | 1577.8   | Detected   | 1425.1   | Detected   | Zfp426        | 1.074007084 | 1.18908735 | 1.08636987 | 1.2027748 |
| A_55_P1990 | 3988     | Detected | 3530     | Detected | 3184.8   | Detected   | 4282.9   | Detected   | Ube2j1        | 1.073946841 | 0.79859579 | 1.21328612 | 0.9022096 |
| A_51_P4640 | 551.8    | Detected | 549      | Detected | 478.8    | Detected   | 592.6    | Detected   | Zc3h13        | 1.073939833 | 0.86770569 | 1.07941712 | 0.8721311 |

|            |          |            |          |          |          |          |          |            |               |             |            |            |           |
|------------|----------|------------|----------|----------|----------|----------|----------|------------|---------------|-------------|------------|------------|-----------|
| A_55_P2251 | 79.8     | Detected   | 86.9     | Detected | 137.1    | Detected | 85.7     | Detected   | AV313155      | 1.073934837 | 1.71804511 | 0.98619102 | 1.5776755 |
| A_52_P4034 | 142.1    | Detected   | 168.4    | Detected | 171.1    | Detected | 152.6    | Detected   | Ptpn2         | 1.073891626 | 1.20408163 | 0.90617577 | 1.0160333 |
| A_55_P2126 | 16064.3  | Detected   | 13990.2  | Detected | 13680.7  | Detected | 17249.7  | Detected   | Usp16         | 1.073790953 | 0.8516213  | 1.23298452 | 0.9778774 |
| A_55_P2095 | 12.2     | Not Detect | 31.2     | Detected | 29.4     | Detected | 13.1     | Not Detect | 1700028K03Rik | 1.073770492 | 2.40983607 | 0.41987179 | 0.9423077 |
| A_51_P1214 | 4938.5   | Detected   | 4652.7   | Detected | 5836.7   | Detected | 5302.7   | Detected   | Slc35a4       | 1.073747089 | 1.18187709 | 1.13970383 | 1.2544759 |
| A_55_P2066 | 99.1     | Detected   | 87       | Detected | 127.6    | Detected | 106.4    | Detected   | Aak1          | 1.073662967 | 1.28758829 | 1.22298851 | 1.4666667 |
| A_66_P1023 | 3348.3   | Detected   | 3759.2   | Detected | 3143.6   | Detected | 3594.9   | Detected   | Elac2         | 1.073649315 | 0.9388645  | 0.95629389 | 0.8362418 |
| A_52_P6411 | 65.2     | Detected   | 115.7    | Detected | 74.1     | Detected | 70       | Detected   | 1700029J07Rik | 1.073619632 | 1.13650307 | 0.60501296 | 0.6404494 |
| A_55_P2018 | 104698.6 | Detected   | 105966.6 | Detected | 150836.2 | Detected | 112402.4 | Detected   | Cox8a         | 1.073580736 | 1.44067065 | 1.06073423 | 1.4234315 |
| A_51_P3013 | 18100.8  | Detected   | 10964.9  | Detected | 16889.6  | Detected | 19431.8  | Detected   | Ciz1          | 1.073532662 | 0.93308583 | 1.77218214 | 1.5403332 |
| A_55_P2376 | 49       | Detected   | 60.8     | Detected | 69.7     | Detected | 52.6     | Detected   | 1810044D09Rik | 1.073469388 | 1.42244898 | 0.86513158 | 1.1463816 |
| A_55_P2116 | 217.9    | Detected   | 167      | Detected | 240.2    | Detected | 233.9    | Detected   | A130010J15Rik | 1.073428178 | 1.10234052 | 1.4005988  | 1.4383234 |
| A_55_P2166 | 4016.4   | Detected   | 4037.3   | Detected | 3887.4   | Detected | 4311.3   | Detected   | Stk11         | 1.073423962 | 0.96788169 | 1.06786714 | 0.9628712 |
| A_55_P1985 | 22538.5  | Detected   | 15501.6  | Detected | 23292.8  | Detected | 24192.4  | Detected   | Ttyh2         | 1.073381103 | 1.03346718 | 1.5606389  | 1.5026062 |
| A_55_P1959 | 242.6    | Detected   | 206      | Detected | 239.3    | Detected | 260.4    | Detected   | Stx1b         | 1.073371805 | 0.98639736 | 1.26407767 | 1.1616505 |
| A_66_P1001 | 25.9     | Detected   | 23.9     | Detected | 22.2     | Detected | 27.8     | Not Detect | Dynl1a        | 1.073359073 | 0.85714286 | 1.16317992 | 0.9288703 |
| A_55_P2025 | 58411.4  | Detected   | 66888.7  | Detected | 54125.2  | Detected | 62695.9  | Detected   | Hmgb1         | 1.073350408 | 0.92662049 | 0.93731677 | 0.809183  |
| A_55_P1971 | 54747.1  | Detected   | 62464.1  | Detected | 67470.2  | Detected | 58759.1  | Detected   | Timm23        | 1.073282242 | 1.2323977  | 0.94068593 | 1.0801436 |
| A_55_P2022 | 1127.1   | Detected   | 1183.8   | Detected | 1085.9   | Detected | 1209.6   | Detected   | Sfrs18        | 1.073196699 | 0.96344601 | 1.02179422 | 0.9173002 |
| A_55_P2044 | 73.8     | Detected   | 84       | Detected | 93.3     | Detected | 79.2     | Detected   | Gm10766       | 1.073170732 | 1.26422764 | 0.94285714 | 1.1107143 |
| A_55_P2065 | 29454.8  | Detected   | 26242    | Detected | 29333.4  | Detected | 31606.7  | Detected   | Ccnb1         | 1.073057702 | 0.99587843 | 1.20443183 | 1.1178035 |
| A_55_P2096 | 1631.6   | Detected   | 1556.6   | Detected | 1583.5   | Detected | 1750.6   | Detected   | Cdc42bpa      | 1.072934543 | 0.97051974 | 1.12463061 | 1.0172813 |
| A_55_P2087 | 267145.8 | Detected   | 293591.4 | Detected | 317633.7 | Detected | 286578.4 | Detected   | Gm6251        | 1.072741552 | 1.18899006 | 0.97611306 | 1.0818903 |
| A_52_P3868 | 1925.4   | Detected   | 2262.5   | Detected | 2196     | Detected | 2065.4   | Detected   | Trmu          | 1.072712164 | 1.14054222 | 0.91288398 | 0.9706077 |
| A_51_P5181 | 5807.9   | Detected   | 6292.5   | Detected | 6272.1   | Detected | 6230.2   | Detected   | Rrp9          | 1.072711307 | 1.07992562 | 0.99009932 | 0.996758  |
| A_51_P4813 | 4032.5   | Detected   | 2826.4   | Detected | 4425.5   | Detected | 4325.6   | Detected   | Kif11         | 1.072684439 | 1.09745815 | 1.5304274  | 1.5657727 |
| A_51_P1255 | 1416.4   | Detected   | 1908.3   | Detected | 1667.6   | Detected | 1519.3   | Detected   | Mettl13       | 1.072648969 | 1.17735103 | 0.79615364 | 0.8738668 |
| A_51_P3113 | 41.3     | Detected   | 46.6     | Detected | 34.7     | Detected | 44.3     | Not Detect | 4930449E01Rik | 1.072639225 | 0.8401937  | 0.95064378 | 0.7446352 |
| A_55_P2138 | 130.8    | Detected   | 129      | Detected | 112.4    | Detected | 140.3    | Detected   | Gon4l         | 1.072629969 | 0.85932722 | 1.0875969  | 0.8713178 |
| A_51_P4159 | 113950.2 | Detected   | 99376.6  | Detected | 109072.8 | Detected | 122223.8 | Detected   | Psma2         | 1.072607156 | 0.95719709 | 1.22990523 | 1.0975703 |
| A_55_P2093 | 1466.7   | Detected   | 1570.3   | Detected | 1317.3   | Detected | 1572.9   | Detected   | Ddi2          | 1.072407445 | 0.89813868 | 1.00165573 | 0.8388843 |
| A_52_P3263 | 13414.7  | Detected   | 10683.1  | Detected | 14352.7  | Detected | 14385.8  | Detected   | Erf           | 1.072390736 | 1.06992329 | 1.34659415 | 1.3434958 |
| A_51_P4835 | 4763.5   | Detected   | 5071.4   | Detected | 4550.4   | Detected | 5108.3   | Detected   | Ube2b         | 1.072383751 | 0.95526399 | 1.0072761  | 0.897267  |
| A_55_P2050 | 3500.1   | Detected   | 3495.9   | Detected | 2034.7   | Detected | 3753.4   | Detected   | Ankrd50       | 1.072369361 | 0.58132625 | 1.07365771 | 0.5820247 |
| A_55_P2256 | 676.1    | Detected   | 688.6    | Detected | 215.1    | Detected | 725      | Detected   | C130078N14    | 1.072326579 | 0.3181482  | 1.05286088 | 0.3123729 |
| A_51_P4285 | 73123.8  | Detected   | 75682.4  | Detected | 82807.9  | Detected | 78411.9  | Detected   | Krtcap2       | 1.072317084 | 1.13243431 | 1.03606519 | 1.09415   |
| A_66_P1072 | 16.6     | Detected   | 24       | Detected | 23.7     | Detected | 17.8     | Not Detect | Tmprss11f     | 1.072289157 | 1.42771084 | 0.74166667 | 0.9875    |
| A_55_P2163 | 10720.6  | Detected   | 10538.9  | Detected | 10168.1  | Detected | 11494.8  | Detected   | Mapkapk5      | 1.072216107 | 0.94846371 | 1.09070207 | 0.9648161 |
| A_55_P2078 | 27.7     | Detected   | 28.5     | Detected | 34.3     | Detected | 29.7     | Not Detect | Tdh           | 1.072202166 | 1.23826715 | 1.04210526 | 1.2035088 |
| A_51_P2820 | 19877.2  | Detected   | 20378.2  | Detected | 23214.3  | Detected | 21312.1  | Detected   | Urod          | 1.072188236 | 1.16788582 | 1.04582839 | 1.1391732 |

|            |          |          |          |            |          |            |          |            |               |             |            |            |           |
|------------|----------|----------|----------|------------|----------|------------|----------|------------|---------------|-------------|------------|------------|-----------|
| A_55_P2109 | 99300.8  | Detected | 118763.9 | Detected   | 106757.8 | Detected   | 106461.2 | Detected   | Rpl23a        | 1.07210818  | 1.07509506 | 0.89641044 | 0.8989078 |
| A_51_P4097 | 1116.5   | Detected | 876.8    | Detected   | 1049.2   | Detected   | 1197     | Detected   | Secisbp2      | 1.072100313 | 0.93972235 | 1.36519161 | 1.1966241 |
| A_55_P2146 | 160.9    | Detected | 147.1    | Detected   | 161.6    | Detected   | 172.5    | Detected   | Ggt5          | 1.072094469 | 1.00435053 | 1.17267165 | 1.0985724 |
| A_51_P3968 | 25953.3  | Detected | 20638.5  | Detected   | 30830.6  | Detected   | 27824.3  | Detected   | Timm10b       | 1.072091025 | 1.18792601 | 1.34817453 | 1.4938392 |
| A_55_P2117 | 2818.3   | Detected | 3669.7   | Detected   | 3955.9   | Detected   | 3021.4   | Detected   | Snhg1         | 1.07206472  | 1.40364759 | 0.82333706 | 1.07799   |
| A_55_P2132 | 122816.4 | Detected | 117610.1 | Detected   | 132710   | Detected   | 131667   | Detected   | Rps16         | 1.072063666 | 1.08055602 | 1.1195212  | 1.1283895 |
| A_55_P1988 | 10714.7  | Detected | 8237.5   | Detected   | 8532     | Detected   | 11486.7  | Detected   | Cyth2         | 1.072050547 | 0.79628921 | 1.39444006 | 1.0357511 |
| A_55_P2083 | 115.2    | Detected | 95.6     | Detected   | 114.9    | Detected   | 123.5    | Detected   | 2810410L24Rik | 1.072048611 | 0.99739583 | 1.291841   | 1.2018828 |
| A_55_P2014 | 38356.6  | Detected | 27696.2  | Detected   | 46917.3  | Detected   | 41119.9  | Detected   | Rab14         | 1.07204236  | 1.22318714 | 1.4846766  | 1.6939977 |
| A_55_P2019 | 1267.6   | Detected | 999.3    | Detected   | 1511     | Detected   | 1358.9   | Detected   | Spopl         | 1.072025876 | 1.19201641 | 1.3598519  | 1.5120584 |
| A_55_P1953 | 21392.2  | Detected | 21248    | Detected   | 12438    | Detected   | 22931.2  | Detected   | Pbx1          | 1.07194211  | 0.58142688 | 1.07921687 | 0.5853727 |
| A_55_P2075 | 254989.3 | Detected | 294176.6 | Detected   | 271806.7 | Detected   | 273324.8 | Detected   | Tpt1          | 1.071906939 | 1.06595336 | 0.92911809 | 0.9239576 |
| A_51_P3656 | 26723.9  | Detected | 18607.8  | Detected   | 20438    | Detected   | 28645.4  | Detected   | Rala          | 1.07190193  | 0.76478358 | 1.5394297  | 1.0983566 |
| A_52_P2861 | 10669.7  | Detected | 11205.3  | Detected   | 11865.4  | Detected   | 11436.7  | Detected   | Cisd2         | 1.071885807 | 1.11206501 | 1.02065094 | 1.0589096 |
| A_52_P2767 | 2882.1   | Detected | 3598.3   | Detected   | 3428.2   | Detected   | 3089.2   | Detected   | Tox4          | 1.071857326 | 1.18947989 | 0.85851652 | 0.9527277 |
| A_55_P2376 | 250.5    | Detected | 214.9    | Detected   | 216.7    | Detected   | 268.5    | Detected   | Igkv4-72      | 1.071856287 | 0.86506986 | 1.24941833 | 1.008376  |
| A_55_P1970 | 340377.8 | Detected | 346779.2 | Detected   | 367986.2 | Detected   | 364833.6 | Detected   | Rpsa          | 1.071848987 | 1.08111105 | 1.0520631  | 1.0611542 |
| A_55_P2186 | 439957.2 | Detected | 469853.7 | Detected   | 446608.8 | Detected   | 471509   | Detected   | Gapdh         | 1.071715612 | 1.01511874 | 1.00352301 | 0.9505274 |
| A_55_P2144 | 25.1     | Detected | 22.4     | Detected   | 21.1     | Detected   | 26.9     | Not Detect | Csnk1g3       | 1.071713147 | 0.84063745 | 1.20089286 | 0.9419643 |
| A_52_P5580 | 4117     | Detected | 3585.1   | Detected   | 3684.8   | Detected   | 4412.2   | Detected   | Poc5          | 1.071702696 | 0.89502065 | 1.23070486 | 1.0278095 |
| A_55_P2031 | 1401.3   | Detected | 1416     | Detected   | 1568.2   | Detected   | 1501.7   | Detected   | Gtdc1         | 1.071647756 | 1.11910369 | 1.0605226  | 1.1074859 |
| A_52_P4658 | 853.2    | Detected | 603      | Detected   | 995.6    | Detected   | 914.3    | Detected   | Gramd3        | 1.071612752 | 1.16690108 | 1.51625207 | 1.6510779 |
| A_55_P2165 | 160.6    | Detected | 132.7    | Detected   | 158.4    | Detected   | 172.1    | Detected   | Mybpc1        | 1.071606476 | 0.98630137 | 1.29691032 | 1.1936699 |
| A_55_P2344 | 83.8     | Detected | 89.5     | Detected   | 44       | Detected   | 89.8     | Detected   | LOC553089     | 1.071599045 | 0.52505967 | 1.00335196 | 0.4916201 |
| A_52_P5983 | 4602.1   | Detected | 6744.6   | Detected   | 5329.5   | Detected   | 4931.4   | Detected   | Gtf2f2        | 1.07155429  | 1.15805828 | 0.73116271 | 0.7901877 |
| A_55_P2077 | 174.8    | Detected | 201.4    | Detected   | 129.3    | Detected   | 187.3    | Detected   | Gm6981        | 1.071510297 | 0.73970252 | 0.92999007 | 0.642006  |
| A_55_P1978 | 23.8     | Detected | 24.5     | Detected   | 19.2     | Detected   | 25.5     | Not Detect | Sez6          | 1.071428571 | 0.80672269 | 1.04081633 | 0.7836735 |
| A_51_P3053 | 7414.9   | Detected | 7270.6   | Detected   | 11760.5  | Detected   | 7944.2   | Detected   | B3gnt1        | 1.071383296 | 1.5860632  | 1.0926471  | 1.6175419 |
| A_51_P1963 | 27273.4  | Detected | 23895.8  | Detected   | 27958.2  | Detected   | 29219.3  | Detected   | 1110004E09Rik | 1.071347907 | 1.02510871 | 1.22277974 | 1.1700048 |
| A_51_P2633 | 752.7    | Detected | 927      | Detected   | 821.2    | Detected   | 806.4    | Detected   | Thnsl1        | 1.071343165 | 1.09100571 | 0.86990291 | 0.8858684 |
| A_55_P2091 | 134218.6 | Detected | 126183.8 | Detected   | 143738.5 | Detected   | 143793.4 | Detected   | Hist1h4k      | 1.071337356 | 1.07092832 | 1.13955516 | 1.1391201 |
| A_55_P2123 | 162163.6 | Detected | 163218   | Detected   | 173807.3 | Detected   | 173724.4 | Detected   | Kpna2         | 1.071290968 | 1.07180218 | 1.06437035 | 1.0648783 |
| A_51_P3617 | 56849.8  | Detected | 53143.9  | Detected   | 59266.1  | Detected   | 60902.3  | Detected   | Vapa          | 1.071284332 | 1.04250323 | 1.14598853 | 1.1152004 |
| A_55_P2073 | 47286    | Detected | 36665.2  | Detected   | 33586.7  | Detected   | 50655.2  | Detected   | Mki67         | 1.071251533 | 0.71028846 | 1.38156072 | 0.9160376 |
| A_51_P1089 | 15772.3  | Detected | 19668.6  | Detected   | 20202.8  | Detected   | 16895.7  | Detected   | Ccdc86        | 1.071226137 | 1.28090386 | 0.85901894 | 1.02716   |
| A_55_P2364 | 659      | Detected | 591.8    | Detected   | 520.4    | Detected   | 705.9    | Detected   | D030002E05Rik | 1.071168437 | 0.78968134 | 1.19280162 | 0.8793511 |
| A_52_P9703 | 22.5     | Detected | 14       | Not Detect | 17.7     | Not Detect | 24.1     | Not Detect | Cyp2a4        | 1.071111111 | 0.78666667 | 1.72142857 | 1.2642857 |
| A_66_P1190 | 634.3    | Detected | 525.1    | Detected   | 651.4    | Detected   | 679.4    | Detected   | Tbc1d22b      | 1.071102002 | 1.02695885 | 1.29384879 | 1.2405256 |
| A_55_P2152 | 130.8    | Detected | 101      | Detected   | 113.3    | Detected   | 140.1    | Detected   | Spata2        | 1.071100917 | 0.86620795 | 1.38712871 | 1.1217822 |
| A_51_P2973 | 5530.8   | Detected | 6810.5   | Detected   | 6435.5   | Detected   | 5923.7   | Detected   | Chmp7         | 1.071038548 | 1.16357489 | 0.8697893  | 0.944938  |

|            |          |            |          |            |          |          |         |            |               |             |            |            |           |
|------------|----------|------------|----------|------------|----------|----------|---------|------------|---------------|-------------|------------|------------|-----------|
| A_55_P2045 | 3998.1   | Detected   | 4139.8   | Detected   | 4376.8   | Detected | 4281.9  | Detected   | Nme6          | 1.070983717 | 1.09471999 | 1.03432533 | 1.0572491 |
| A_51_P4960 | 1927.4   | Detected   | 1686.6   | Detected   | 952.7    | Detected | 2064.1  | Detected   | Zcchc14       | 1.070924562 | 0.49429283 | 1.22382308 | 0.5648642 |
| A_55_P2092 | 36.7     | Detected   | 46.7     | Detected   | 19.1     | Detected | 39.3    | Not Detect | Cyp4a10       | 1.070844687 | 0.52043597 | 0.84154176 | 0.4089936 |
| A_52_P2172 | 2776.8   | Detected   | 2283.2   | Detected   | 2327.6   | Detected | 2973.5  | Detected   | Ppme1         | 1.070836935 | 0.83823106 | 1.30233882 | 1.0194464 |
| A_55_P2007 | 151.2    | Detected   | 91.1     | Detected   | 148      | Detected | 161.9   | Detected   | Catsper2      | 1.070767196 | 0.97883598 | 1.77716795 | 1.6245884 |
| A_55_P2079 | 7132.8   | Detected   | 6682.4   | Detected   | 6653.6   | Detected | 7637.4  | Detected   | Fuca1         | 1.070743607 | 0.93281741 | 1.14291273 | 0.9956902 |
| A_55_P2010 | 641.9    | Detected   | 823.1    | Detected   | 719.5    | Detected | 687.3   | Detected   | LOC101056169  | 1.070727528 | 1.1208911  | 0.83501397 | 0.8741344 |
| A_51_P3538 | 1412.8   | Detected   | 1405.5   | Detected   | 1349.6   | Detected | 1512.7  | Detected   | Zfp580        | 1.070710646 | 0.95526614 | 1.07627179 | 0.9602277 |
| A_55_P2024 | 164246.4 | Detected   | 177708.1 | Detected   | 197586.5 | Detected | 175828  | Detected   | Rps27         | 1.07051357  | 1.20298832 | 0.98942029 | 1.1118598 |
| A_55_P2080 | 904.9    | Detected   | 856.3    | Detected   | 822.7    | Detected | 968.7   | Detected   | Aim2          | 1.070505028 | 0.90916123 | 1.13126241 | 0.9607614 |
| A_55_P2050 | 11809.4  | Detected   | 9316     | Detected   | 11114.5  | Detected | 12641.7 | Detected   | Gak           | 1.070477755 | 0.94115704 | 1.35698798 | 1.193055  |
| A_55_P2030 | 2244.8   | Detected   | 1886.7   | Detected   | 1509.8   | Detected | 2403    | Detected   | Kdm6b         | 1.070473984 | 0.67257662 | 1.27365241 | 0.8002332 |
| A_55_P2363 | 545      | Detected   | 641.1    | Detected   | 499.6    | Detected | 583.4   | Detected   | Zfp867        | 1.070458716 | 0.91669725 | 0.90999844 | 0.7792856 |
| A_55_P2258 | 278.3    | Detected   | 319.3    | Detected   | 341.2    | Detected | 297.9   | Detected   | LOC433461     | 1.070427596 | 1.22601509 | 0.93297839 | 1.0685875 |
| A_51_P2805 | 785.8    | Detected   | 902      | Detected   | 812.4    | Detected | 841.1   | Detected   | Supt16        | 1.070374141 | 1.03385085 | 0.93248337 | 0.9006652 |
| A_55_P2141 | 1054.8   | Detected   | 1192.2   | Detected   | 1105.5   | Detected | 1129    | Detected   | Rnu2-10       | 1.070345089 | 1.04806598 | 0.94698876 | 0.9272773 |
| A_55_P2088 | 81862.7  | Detected   | 77938.1  | Detected   | 99145.8  | Detected | 87619.5 | Detected   | Snrpd2        | 1.070322626 | 1.21112301 | 1.12421909 | 1.2721095 |
| A_55_P2181 | 2444.9   | Detected   | 1255.2   | Detected   | 2696.5   | Detected | 2616.8  | Detected   | Il10rb        | 1.070309624 | 1.10290809 | 2.08476737 | 2.1482632 |
| A_55_P2060 | 2230.3   | Detected   | 2663.2   | Detected   | 2513.6   | Detected | 2387    | Detected   | Grwd1         | 1.070259606 | 1.12702327 | 0.89629018 | 0.943827  |
| A_55_P2048 | 2800.4   | Detected   | 2046.9   | Detected   | 3277     | Detected | 2997    | Detected   | Ppil2         | 1.070204257 | 1.17018997 | 1.46416532 | 1.6009575 |
| A_55_P2184 | 1969.2   | Detected   | 1392.8   | Detected   | 1949.7   | Detected | 2107.3  | Detected   | Rnd2          | 1.070130002 | 0.9900975  | 1.5129954  | 1.399842  |
| A_51_P3718 | 3186.1   | Detected   | 2537.9   | Detected   | 3464     | Detected | 3409.5  | Detected   | Zmynd8        | 1.070117071 | 1.08722262 | 1.34343355 | 1.364908  |
| A_66_P1350 | 114.1    | Detected   | 115.8    | Detected   | 106.1    | Detected | 122.1   | Detected   | Krtap5-1      | 1.070113935 | 0.92988606 | 1.05440415 | 0.9162349 |
| A_55_P1960 | 8542.5   | Detected   | 10352.1  | Detected   | 7141.3   | Detected | 9141.2  | Detected   | Pigr          | 1.07008487  | 0.83597308 | 0.88302856 | 0.6898407 |
| A_55_P2013 | 1227.2   | Detected   | 1565.2   | Detected   | 1520.5   | Detected | 1313.2  | Detected   | L2hgdh        | 1.070078227 | 1.23899935 | 0.83899821 | 0.9714413 |
| A_55_P2052 | 2084.6   | Detected   | 1509.1   | Detected   | 2224.3   | Detected | 2230.5  | Detected   | Setd4         | 1.069989446 | 1.06701525 | 1.47803326 | 1.4739249 |
| A_52_P7249 | 66381.9  | Detected   | 74831.4  | Detected   | 84426.7  | Detected | 71026.8 | Detected   | Ndufa12       | 1.069972387 | 1.27183314 | 0.94915771 | 1.1282256 |
| A_55_P2016 | 2499.2   | Detected   | 1987.2   | Detected   | 2069.5   | Detected | 2673.6  | Detected   | Csnk1g1       | 1.06978233  | 0.82806498 | 1.34541063 | 1.0414151 |
| A_52_P6422 | 8.6      | Not Detect | 5.2      | Not Detect | 31.6     | Detected | 9.2     | Not Detect | Pik3ap1       | 1.069767442 | 3.6744186  | 1.76923077 | 6.0769231 |
| A_55_P1982 | 17.2     | Detected   | 16.5     | Detected   | 17.9     | Detected | 18.4    | Not Detect | Ap3b2         | 1.069767442 | 1.04069767 | 1.11515152 | 1.0848485 |
| A_55_P2092 | 7638.8   | Detected   | 12945.4  | Detected   | 6268.6   | Detected | 8171.6  | Detected   | Fbxo2         | 1.069749175 | 0.82062628 | 0.63123581 | 0.4842338 |
| A_51_P1310 | 61343.6  | Detected   | 69300.4  | Detected   | 64134.6  | Detected | 65621.8 | Detected   | Ngdn          | 1.069741587 | 1.04549782 | 0.94691806 | 0.9254579 |
| A_55_P1958 | 155      | Detected   | 142.8    | Detected   | 125.2    | Detected | 165.8   | Detected   | P2rx1         | 1.069677419 | 0.80774194 | 1.16106443 | 0.8767507 |
| A_66_P1137 | 24.4     | Detected   | 29.5     | Detected   | 28.3     | Detected | 26.1    | Not Detect | Nespos        | 1.069672131 | 1.15983607 | 0.88474576 | 0.959322  |
| A_55_P1966 | 51865.9  | Detected   | 47875    | Detected   | 59127.1  | Detected | 55477.1 | Detected   | Impdh2        | 1.069625708 | 1.1399995  | 1.1587906  | 1.2350308 |
| A_55_P2003 | 4919.5   | Detected   | 4734.6   | Detected   | 4495     | Detected | 5262    | Detected   | Tstd2         | 1.069620896 | 0.91371074 | 1.11139273 | 0.9493938 |
| A_55_P2060 | 129.3    | Detected   | 121.4    | Detected   | 97.9     | Detected | 138.3   | Detected   | Ermn          | 1.069605568 | 0.75715391 | 1.13920923 | 0.806425  |
| A_55_P2157 | 15075    | Detected   | 14571.3  | Detected   | 10881.6  | Detected | 16123.8 | Detected   | 2510039O18Rik | 1.069572139 | 0.72183085 | 1.10654506 | 0.7467831 |
| A_55_P2046 | 665.5    | Detected   | 718.5    | Detected   | 665.4    | Detected | 711.8   | Detected   | Zfp81         | 1.069571751 | 0.99984974 | 0.99067502 | 0.926096  |
| A_55_P2127 | 12963.7  | Detected   | 10800.8  | Detected   | 12625.7  | Detected | 13864   | Detected   | Spsb2         | 1.069447766 | 0.9739272  | 1.28360862 | 1.1689597 |

|            |                   |                   |                   |                   |               |             |            |            |           |
|------------|-------------------|-------------------|-------------------|-------------------|---------------|-------------|------------|------------|-----------|
| A_55_P2147 | 860.4 Detected    | 972.3 Detected    | 820.7 Detected    | 920.1 Detected    | Dnaja1        | 1.069386332 | 0.95385867 | 0.94631287 | 0.844081  |
| A_51_P4315 | 2946.9 Detected   | 3437.3 Detected   | 3423.8 Detected   | 3151.3 Detected   | Ten1          | 1.069361023 | 1.16183108 | 0.91679516 | 0.9960725 |
| A_55_P2025 | 1216 Detected     | 1017.2 Detected   | 1083.5 Detected   | 1300.3 Detected   | Ccn2          | 1.069325658 | 0.89103618 | 1.27831302 | 1.0651789 |
| A_55_P2033 | 6625.2 Detected   | 4891.7 Detected   | 9051.2 Detected   | 7084.4 Detected   | Plekha8       | 1.069311115 | 1.36617762 | 1.44824907 | 1.8503179 |
| A_55_P1991 | 19961.7 Detected  | 21092.9 Detected  | 18676.5 Detected  | 21344.8 Detected  | Hmmr          | 1.069287686 | 0.93561671 | 1.01194241 | 0.8854401 |
| A_55_P1990 | 9148.9 Detected   | 10239.9 Detected  | 10614.1 Detected  | 9782.8 Detected   | Chchd6        | 1.069287018 | 1.1601504  | 0.95536089 | 1.0365433 |
| A_51_P3438 | 1619.9 Detected   | 1467 Detected     | 1532.7 Detected   | 1732.1 Detected   | Slc35f6       | 1.069263535 | 0.94616952 | 1.18070893 | 1.0447853 |
| A_51_P1445 | 41.9 Detected     | 49.1 Detected     | 42.8 Detected     | 44.8 Not Detect   | Sntb1         | 1.069212411 | 1.02147971 | 0.91242363 | 0.8716904 |
| A_55_P2130 | 308926.9 Detected | 280710.7 Detected | 350142.2 Detected | 330283.1 Detected | Gm12508       | 1.06913027  | 1.13341441 | 1.17659605 | 1.2473418 |
| A_55_P2160 | 143.3 Detected    | 75.7 Detected     | 91.8 Detected     | 153.2 Detected    | Kalrn         | 1.069085834 | 0.6406141  | 2.02377807 | 1.2126816 |
| A_55_P2008 | 30.4 Detected     | 28.5 Detected     | 24.9 Detected     | 32.5 Not Detect   | Gm6268        | 1.069078947 | 0.81907895 | 1.14035088 | 0.8736842 |
| A_55_P2142 | 628.7 Detected    | 609.9 Detected    | 650.1 Detected    | 672.1 Detected    | 1700037C18Rik | 1.069031334 | 1.03403849 | 1.10198393 | 1.0659124 |
| A_55_P2123 | 103 Detected      | 98.6 Detected     | 107.8 Detected    | 110.1 Detected    | Zfhx2         | 1.068932039 | 1.04660194 | 1.11663286 | 1.0933063 |
| A_51_P3945 | 131172.2 Detected | 124172.1 Detected | 159287.4 Detected | 140209.9 Detected | Tkt           | 1.068899508 | 1.2143381  | 1.12915784 | 1.2827954 |
| A_51_P4142 | 3658.9 Detected   | 4620.2 Detected   | 3200.2 Detected   | 3910.9 Detected   | Pomgnt2       | 1.068873159 | 0.87463445 | 0.84647851 | 0.692654  |
| A_55_P1982 | 3798.9 Detected   | 4097.2 Detected   | 5075.7 Detected   | 4060.5 Detected   | Odc1          | 1.068862039 | 1.33609729 | 0.99104266 | 1.2388216 |
| A_55_P1981 | 668.2 Detected    | 1033.4 Detected   | 617.9 Detected    | 714.2 Detected    | Syt8          | 1.068841664 | 0.92472314 | 0.6911167  | 0.5979292 |
| A_55_P2091 | 24.7 Detected     | 35.4 Detected     | 14.1 Not Detect   | 26.4 Not Detect   | Emilin3       | 1.068825911 | 0.5708502  | 0.74576271 | 0.3983051 |
| A_55_P1952 | 18193.8 Detected  | 14761.4 Detected  | 17707.3 Detected  | 19444.5 Detected  | Son           | 1.068743198 | 0.97326012 | 1.31725311 | 1.1995678 |
| A_65_P1185 | 29.1 Detected     | 35.8 Detected     | 28.8 Detected     | 31.1 Not Detect   | Arhgap28      | 1.068728522 | 0.98969072 | 0.86871508 | 0.8044693 |
| A_51_P1218 | 13.1 Detected     | 12.8 Not Detect   | 12.9 Not Detect   | 14 Not Detect     | Rac2          | 1.06870229  | 0.98473282 | 1.09375    | 1.0078125 |
| A_55_P2143 | 438.3 Detected    | 380.6 Detected    | 330.9 Detected    | 468.4 Detected    | Slc18a2       | 1.068674424 | 0.75496235 | 1.23068839 | 0.8694167 |
| A_51_P3948 | 49.6 Detected     | 38.6 Detected     | 49.9 Detected     | 53 Detected       | Svep1         | 1.068548387 | 1.00604839 | 1.37305699 | 1.2927461 |
| A_51_P1892 | 4255.3 Detected   | 3825 Detected     | 4754.2 Detected   | 4546.7 Detected   | Tmcc3         | 1.068479308 | 1.11724203 | 1.18867974 | 1.2429281 |
| A_51_P1598 | 3350.1 Detected   | 2614.6 Detected   | 3662.5 Detected   | 3579.4 Detected   | Smpd4         | 1.068445718 | 1.09325095 | 1.36900482 | 1.4007879 |
| A_52_P4609 | 26202 Detected    | 24234 Detected    | 24768.1 Detected  | 27994.8 Detected  | BC048507      | 1.068422258 | 0.94527517 | 1.15518693 | 1.0220393 |
| A_55_P1974 | 17406.1 Detected  | 16000 Detected    | 17406.9 Detected  | 18597 Detected    | Gxyt2         | 1.068418543 | 1.00004596 | 1.1623125  | 1.0879313 |
| A_55_P2047 | 2196.3 Detected   | 2045.2 Detected   | 1057.4 Detected   | 2346.5 Detected   | Katnal1       | 1.068387743 | 0.48144607 | 1.14732056 | 0.5170155 |
| A_51_P1593 | 260.4 Detected    | 279.1 Detected    | 221.3 Detected    | 278.2 Detected    | Sub1          | 1.068356375 | 0.84984639 | 0.99677535 | 0.7929058 |
| A_51_P4606 | 976.1 Detected    | 925.2 Detected    | 541.5 Detected    | 1042.8 Detected   | Hoxb3         | 1.068333163 | 0.55475873 | 1.12710765 | 0.5852789 |
| A_55_P2401 | 529.9 Detected    | 506.3 Detected    | 587.8 Detected    | 566.1 Detected    | 4930558N01Rik | 1.068314776 | 1.1092659  | 1.11811179 | 1.1609718 |
| A_52_P6165 | 77.6 Detected     | 398.1 Detected    | 67.8 Detected     | 82.9 Detected     | Lgr6          | 1.068298969 | 0.87371134 | 0.20823914 | 0.170309  |
| A_66_P1171 | 1028.1 Detected   | 1004.7 Detected   | 902.3 Detected    | 1098.3 Detected   | Rad54l2       | 1.068281296 | 0.87763836 | 1.09316214 | 0.898079  |
| A_55_P2037 | 773.3 Detected    | 660.5 Detected    | 681.2 Detected    | 826.1 Detected    | Ino80         | 1.068278805 | 0.88090004 | 1.25071915 | 1.0313399 |
| A_55_P2002 | 134.8 Detected    | 113.2 Detected    | 150.9 Detected    | 144 Detected      | Sumo3         | 1.068249258 | 1.1194362  | 1.27208481 | 1.3330389 |
| A_55_P2189 | 102.6 Detected    | 49.1 Detected     | 54.5 Detected     | 109.6 Detected    | A630073K07Rik | 1.068226121 | 0.53118908 | 2.23217923 | 1.1099796 |
| A_51_P2745 | 17664 Detected    | 13429.8 Detected  | 17627.1 Detected  | 18868.5 Detected  | Tex264        | 1.068189538 | 0.99791101 | 1.40497252 | 1.3125363 |
| A_55_P2166 | 52.8 Detected     | 45.9 Detected     | 57.9 Detected     | 56.4 Detected     | Foxi3         | 1.068181818 | 1.09659091 | 1.22875817 | 1.2614379 |
| A_55_P2156 | 22 Detected       | 21.8 Detected     | 26 Detected       | 23.5 Not Detect   | B930054O08    | 1.068181818 | 1.18181818 | 1.07798165 | 1.1926606 |
| A_51_P4134 | 5755.5 Detected   | 5761.7 Detected   | 6135 Detected     | 6147.9 Detected   | Parg          | 1.068178264 | 1.06593693 | 1.06702883 | 1.0647899 |



|            |          |          |          |            |          |            |          |            |               |             |            |            |           |
|------------|----------|----------|----------|------------|----------|------------|----------|------------|---------------|-------------|------------|------------|-----------|
| A_51_P2146 | 799.6    | Detected | 625      | Detected   | 892.1    | Detected   | 854.1    | Detected   | Tpmt          | 1.06815908  | 1.11568284 | 1.36656    | 1.42736   |
| A_52_P9324 | 118.9    | Detected | 95.9     | Detected   | 175.1    | Detected   | 127      | Detected   | Gm10941       | 1.068124474 | 1.47266611 | 1.32429614 | 1.8258603 |
| A_51_P2868 | 3603.9   | Detected | 3035.6   | Detected   | 3337.7   | Detected   | 3849.4   | Detected   | Wdr33         | 1.068120647 | 0.92613558 | 1.26808539 | 1.099519  |
| A_55_P2045 | 541.8    | Detected | 580.3    | Detected   | 559.4    | Detected   | 578.7    | Detected   | Spata32       | 1.068106312 | 1.03248431 | 0.99724281 | 0.9639841 |
| A_55_P1966 | 144660.3 | Detected | 186386.6 | Detected   | 177026.9 | Detected   | 154511.9 | Detected   | Eif3h         | 1.068101615 | 1.2237421  | 0.8289861  | 0.9497834 |
| A_52_P6417 | 3076.6   | Detected | 5986.4   | Detected   | 3725     | Detected   | 3286.1   | Detected   | Ggct          | 1.06809465  | 1.21075213 | 0.54892757 | 0.6222438 |
| A_55_P2013 | 788.7    | Detected | 767      | Detected   | 698.6    | Detected   | 842.4    | Detected   | Gm4402        | 1.068086725 | 0.88576138 | 1.09830508 | 0.9108214 |
| A_55_P1965 | 28117.1  | Detected | 24720.8  | Detected   | 33897.3  | Detected   | 30031    | Detected   | Gm4889        | 1.068068898 | 1.20557597 | 1.21480696 | 1.3712056 |
| A_52_P6382 | 229.7    | Detected | 216.9    | Detected   | 141.7    | Detected   | 245.3    | Detected   | Fam71f1       | 1.067914671 | 0.6168916  | 1.13093592 | 0.6532964 |
| A_55_P2023 | 3847.8   | Detected | 3344.4   | Detected   | 4274.1   | Detected   | 4108.9   | Detected   | Arpc3         | 1.067856957 | 1.11079058 | 1.22859108 | 1.2779871 |
| A_55_P1953 | 4008.8   | Detected | 3927     | Detected   | 4072.9   | Detected   | 4280.7   | Detected   | Top3a         | 1.067825783 | 1.01598982 | 1.09006875 | 1.037153  |
| A_51_P5126 | 228.6    | Detected | 172.6    | Detected   | 294.7    | Detected   | 244.1    | Detected   | Syngn4        | 1.067804024 | 1.28915136 | 1.41425261 | 1.707416  |
| A_52_P6593 | 218.3    | Detected | 737.1    | Detected   | 3.4      | Not Detect | 233.1    | Detected   | Spsb4         | 1.06779661  | 0.0155749  | 0.31623932 | 0.0046127 |
| A_55_P2174 | 2343.2   | Detected | 1307.9   | Detected   | 2241.2   | Detected   | 2502     | Detected   | Cerk          | 1.06777057  | 0.95646978 | 1.91299029 | 1.7135867 |
| A_55_P1997 | 341      | Detected | 329.7    | Detected   | 258.4    | Detected   | 364.1    | Detected   | AI314180      | 1.067741935 | 0.75777126 | 1.10433728 | 0.7837428 |
| A_55_P2121 | 144.7    | Detected | 152.8    | Detected   | 100.8    | Detected   | 154.5    | Detected   | Fbn2          | 1.06772633  | 0.69661368 | 1.01112565 | 0.6596859 |
| A_66_P1146 | 2519.4   | Detected | 2232.2   | Detected   | 3525.8   | Detected   | 2690     | Detected   | Cdc25c        | 1.067714535 | 1.39946019 | 1.20508915 | 1.579518  |
| A_55_P2044 | 338228.3 | Detected | 334977.4 | Detected   | 368398   | Detected   | 361119.8 | Detected   | Gm8210        | 1.067680617 | 1.08919922 | 1.07804228 | 1.0997697 |
| A_55_P2024 | 191302.5 | Detected | 209337.9 | Detected   | 219448.2 | Detected   | 204248.9 | Detected   | Rpl34         | 1.067675017 | 1.14712667 | 0.97569002 | 1.0482966 |
| A_51_P3147 | 7490.4   | Detected | 9948.2   | Detected   | 7868.6   | Detected   | 7997.2   | Detected   | Rabggtb       | 1.067659938 | 1.0504913  | 0.80388412 | 0.7909572 |
| A_55_P2159 | 134.5    | Detected | 130      | Detected   | 168.3    | Detected   | 143.6    | Detected   | Zfp58         | 1.067657993 | 1.25130112 | 1.10461538 | 1.2946154 |
| A_55_P2152 | 124035.3 | Detected | 129502   | Detected   | 139276   | Detected   | 132424   | Detected   | Atp5h         | 1.067631553 | 1.12287389 | 1.02256336 | 1.0754737 |
| A_55_P2088 | 6583.9   | Detected | 5904.8   | Detected   | 6531.2   | Detected   | 7029     | Detected   | Acad10        | 1.067604307 | 0.99199563 | 1.19038748 | 1.1060832 |
| A_55_P1986 | 317339   | Detected | 293929.3 | Detected   | 334389.8 | Detected   | 338768   | Detected   | Tagln2        | 1.067527156 | 1.05373055 | 1.15254927 | 1.1376539 |
| A_55_P2153 | 2695.4   | Detected | 3174.1   | Detected   | 3477.9   | Detected   | 2877.3   | Detected   | Pycrl         | 1.067485345 | 1.29030942 | 0.90649318 | 1.0957122 |
| A_55_P2405 | 99.3     | Detected | 71.8     | Detected   | 56.6     | Detected   | 106      | Detected   | E230008O15Rik | 1.067472306 | 0.56998993 | 1.47632312 | 0.7883008 |
| A_55_P2258 | 5066.1   | Detected | 4718.8   | Detected   | 5893.2   | Detected   | 5407.7   | Detected   | C030009H01Rik | 1.067428594 | 1.16326168 | 1.14599051 | 1.2488768 |
| A_55_P2088 | 2933.3   | Detected | 2378.6   | Detected   | 3057.1   | Detected   | 3130.8   | Detected   | Ctdsp2        | 1.067330311 | 1.04220503 | 1.31623644 | 1.2852518 |
| A_55_P2387 | 133.7    | Detected | 123.2    | Detected   | 136.1    | Detected   | 142.7    | Detected   | 2700005E23Rik | 1.067314884 | 1.01795064 | 1.15827922 | 1.1047078 |
| A_55_P1975 | 57370.1  | Detected | 56945.3  | Detected   | 70535.5  | Detected   | 61229.8  | Detected   | Dap3          | 1.067277205 | 1.22948191 | 1.07523887 | 1.2386536 |
| A_55_P2020 | 321.7    | Detected | 346.8    | Detected   | 310.6    | Detected   | 343.3    | Detected   | Haus6         | 1.067143301 | 0.9654958  | 0.98990773 | 0.8956171 |
| A_55_P2100 | 55351.3  | Detected | 49675    | Detected   | 62674.9  | Detected   | 59067.3  | Detected   | Tma7          | 1.067134828 | 1.13231126 | 1.18907499 | 1.261699  |
| A_51_P5024 | 14.9     | Detected | 8.4      | Not Detect | 11.7     | Not Detect | 15.9     | Not Detect | Olf1232       | 1.067114094 | 0.7852349  | 1.89285714 | 1.3928571 |
| A_55_P2138 | 1377.1   | Detected | 1079.7   | Detected   | 1158     | Detected   | 1469.5   | Detected   | Mplkip        | 1.067097524 | 0.84089754 | 1.36102621 | 1.0725201 |
| A_55_P2088 | 9360.2   | Detected | 4726.9   | Detected   | 9556.5   | Detected   | 9988.2   | Detected   | Cdc42ep4      | 1.067092583 | 1.02097177 | 2.11305507 | 2.0217267 |
| A_55_P2045 | 118297.5 | Detected | 133137.6 | Detected   | 135704   | Detected   | 126231.6 | Detected   | Rpl34-ps1     | 1.067069042 | 1.14714174 | 0.94812885 | 1.0192763 |
| A_55_P2078 | 620.8    | Detected | 555.2    | Detected   | 637.7    | Detected   | 662.3    | Detected   | Gm10183       | 1.066849227 | 1.02722294 | 1.19290346 | 1.1485951 |
| A_55_P2279 | 115.2    | Detected | 109.1    | Detected   | 93.5     | Detected   | 122.9    | Detected   | 6330415B21Rik | 1.066840278 | 0.81163194 | 1.12648946 | 0.8570119 |
| A_55_P2170 | 1703.2   | Detected | 1476.1   | Detected   | 1617.4   | Detected   | 1817     | Detected   | Lrrc27        | 1.066815406 | 0.94962424 | 1.23094641 | 1.0957252 |
| A_55_P2000 | 10106.8  | Detected | 11858.8  | Detected   | 11504.2  | Detected   | 10781.4  | Detected   | Gm15645       | 1.066747141 | 1.13826335 | 0.90914764 | 0.9700982 |

|            |          |          |          |          |          |            |          |            |               |             |            |            |           |
|------------|----------|----------|----------|----------|----------|------------|----------|------------|---------------|-------------|------------|------------|-----------|
| A_55_P2027 | 3592.2   | Detected | 2630.5   | Detected | 3895     | Detected   | 3831.8   | Detected   | Baiap2        | 1.066700072 | 1.08429375 | 1.45668124 | 1.4807071 |
| A_55_P2133 | 5269.2   | Detected | 4239.5   | Detected | 4581.1   | Detected   | 5620.6   | Detected   | Hnrnp2        | 1.066689441 | 0.86941092 | 1.32576955 | 1.0805755 |
| A_55_P2261 | 18       | Detected | 16.5     | Detected | 5.4      | Not Detect | 19.2     | Not Detect | AI661323      | 1.066666667 | 0.3        | 1.16363636 | 0.3272727 |
| A_55_P2059 | 27       | Detected | 27.9     | Detected | 24.9     | Detected   | 28.8     | Not Detect | AU022751      | 1.066666667 | 0.92222222 | 1.03225806 | 0.8924731 |
| A_55_P2128 | 15459.4  | Detected | 15429.1  | Detected | 14573.4  | Detected   | 16487.8  | Detected   | Sfpq          | 1.066522633 | 0.94268859 | 1.06861709 | 0.9445399 |
| A_52_P4242 | 798.5    | Detected | 735.2    | Detected | 881      | Detected   | 851.6    | Detected   | Gatc          | 1.066499687 | 1.10331872 | 1.15832427 | 1.1983134 |
| A_55_P2041 | 33.1     | Detected | 35.8     | Detected | 35.6     | Detected   | 35.3     | Not Detect | Akap4         | 1.066465257 | 1.0755287  | 0.98603352 | 0.9944134 |
| A_52_P4257 | 5768.6   | Detected | 4264.9   | Detected | 5787.8   | Detected   | 6151.5   | Detected   | Rnf168        | 1.066376591 | 1.00332836 | 1.44235504 | 1.3570775 |
| A_51_P1494 | 7113.7   | Detected | 5900.7   | Detected | 9386.4   | Detected   | 7585.6   | Detected   | Acadl         | 1.066336787 | 1.31948213 | 1.28554239 | 1.5907265 |
| A_55_P1968 | 211.1    | Detected | 217.2    | Detected | 213.2    | Detected   | 225.1    | Detected   | Trp53         | 1.06631928  | 1.00994789 | 1.03637201 | 0.9815838 |
| A_65_P1620 | 425.3    | Detected | 433.4    | Detected | 311.5    | Detected   | 453.5    | Detected   | Baz1a         | 1.066306137 | 0.73242417 | 1.04637748 | 0.7187356 |
| A_55_P1978 | 1745.8   | Detected | 2764.5   | Detected | 2541.2   | Detected   | 1861.5   | Detected   | Hnrnpa2b1     | 1.066273342 | 1.45560774 | 0.67335865 | 0.9192259 |
| A_55_P2019 | 803      | Detected | 540.4    | Detected | 562.8    | Detected   | 856.2    | Detected   | Fmn1          | 1.066251557 | 0.70087173 | 1.58438194 | 1.0414508 |
| A_55_P2050 | 3729.7   | Detected | 4033.4   | Detected | 4155.7   | Detected   | 3976.7   | Detected   | Dlgap5        | 1.066225166 | 1.1142183  | 0.98594238 | 1.0303218 |
| A_55_P2090 | 222      | Detected | 202.1    | Detected | 247.6    | Detected   | 236.7    | Detected   | Tpm3          | 1.066216216 | 1.11531532 | 1.17120238 | 1.2251361 |
| A_55_P2091 | 948.5    | Detected | 757.3    | Detected | 695.5    | Detected   | 1011.3   | Detected   | Wdr26         | 1.066209805 | 0.73326305 | 1.33540209 | 0.9183943 |
| A_55_P1968 | 2573.2   | Detected | 2682     | Detected | 2189.2   | Detected   | 2743.5   | Detected   | Shc4          | 1.066182186 | 0.85076947 | 1.02293065 | 0.8162565 |
| A_55_P2085 | 100987.9 | Detected | 98426    | Detected | 129821.2 | Detected   | 107670.4 | Detected   | Eef1g         | 1.066171294 | 1.28551242 | 1.09392234 | 1.3189726 |
| A_55_P1961 | 17888.8  | Detected | 15754.3  | Detected | 21807.1  | Detected   | 19072.5  | Detected   | Bnip3l        | 1.066169894 | 1.21903649 | 1.21062186 | 1.3841999 |
| A_55_P2131 | 62006.7  | Detected | 64079.2  | Detected | 67718.3  | Detected   | 66109.2  | Detected   | LOC100046079  | 1.066162205 | 1.09211263 | 1.03167955 | 1.0567907 |
| A_55_P2139 | 130      | Detected | 122.6    | Detected | 95.8     | Detected   | 138.6    | Detected   | Lcn6          | 1.066153846 | 0.73692308 | 1.13050571 | 0.7814029 |
| A_55_P2429 | 726.5    | Detected | 652.4    | Detected | 488.2    | Detected   | 774.5    | Detected   | 2610301B20Rik | 1.0660702   | 0.67198899 | 1.18715512 | 0.7483139 |
| A_51_P4327 | 195.4    | Detected | 237.4    | Detected | 128.6    | Detected   | 208.3    | Detected   | Tmem231       | 1.066018424 | 0.65813715 | 0.87742207 | 0.5417018 |
| A_55_P1970 | 7566.8   | Detected | 6780.8   | Detected | 6722.7   | Detected   | 8066.3   | Detected   | Pef1          | 1.066012053 | 0.8884469  | 1.1895794  | 0.9914317 |
| A_51_P2796 | 46490.6  | Detected | 36000    | Detected | 52814    | Detected   | 49554.2  | Detected   | Pagr1a        | 1.065897192 | 1.13601459 | 1.37650556 | 1.4670556 |
| A_52_P2343 | 1033.5   | Detected | 600.6    | Detected | 1029.9   | Detected   | 1101.6   | Detected   | Hic2          | 1.065892598 | 0.99651669 | 1.83416583 | 1.7147852 |
| A_51_P5019 | 2048.9   | Detected | 1864.8   | Detected | 1860.3   | Detected   | 2183.8   | Detected   | Plxna1        | 1.065840207 | 0.90795061 | 1.17106392 | 0.9975869 |
| A_55_P1963 | 61596    | Detected | 48123.5  | Detected | 68229.7  | Detected   | 65648.9  | Detected   | Atp5j         | 1.065798104 | 1.10769693 | 1.36417551 | 1.4178042 |
| A_52_P1033 | 28211.4  | Detected | 19581.1  | Detected | 27798.3  | Detected   | 30064.8  | Detected   | B4galt1       | 1.065696846 | 0.98535698 | 1.53539893 | 1.4196496 |
| A_55_P1982 | 126299.5 | Detected | 111797.4 | Detected | 111698.3 | Detected   | 134594.6 | Detected   | Dnajc5        | 1.065678011 | 0.88439226 | 1.2039153  | 0.9991136 |
| A_55_P1956 | 333576.1 | Detected | 333920.7 | Detected | 327319.8 | Detected   | 355482   | Detected   | Pbld1         | 1.065669873 | 0.98124476 | 1.06457012 | 0.9802321 |
| A_51_P4187 | 111.3    | Detected | 122.1    | Detected | 60.5     | Detected   | 118.6    | Detected   | Rbm33         | 1.0655885   | 0.54357592 | 0.97133497 | 0.4954955 |
| A_55_P1961 | 650      | Detected | 673.7    | Detected | 601.6    | Detected   | 692.5    | Detected   | LOC101055913  | 1.065384615 | 0.92553846 | 1.0279056  | 0.8929791 |
| A_55_P2286 | 93.3     | Detected | 86.7     | Detected | 79.3     | Detected   | 99.4     | Detected   | 9430099O15Rik | 1.065380493 | 0.84994641 | 1.14648212 | 0.9146482 |
| A_55_P2061 | 197.4    | Detected | 225.4    | Detected | 192.1    | Detected   | 210.3    | Detected   | Gm4303        | 1.065349544 | 0.97315096 | 0.93300799 | 0.8522626 |
| A_55_P2074 | 915.4    | Detected | 791.8    | Detected | 650.7    | Detected   | 975.2    | Detected   | Lin28a        | 1.065326633 | 0.71083679 | 1.23162415 | 0.8217984 |
| A_55_P2153 | 173.4    | Detected | 151.1    | Detected | 143.7    | Detected   | 184.7    | Detected   | Tlhc2         | 1.065167243 | 0.82871972 | 1.22236929 | 0.9510258 |
| A_55_P2144 | 3397.5   | Detected | 2948.9   | Detected | 3616.7   | Detected   | 3618.9   | Detected   | Ccdc163       | 1.065165563 | 1.06451803 | 1.22720336 | 1.2264573 |
| A_55_P2083 | 313.5    | Detected | 289.2    | Detected | 252.5    | Detected   | 333.9    | Detected   | Adam33        | 1.06507177  | 0.80542265 | 1.15456432 | 0.8730982 |
| A_52_P7640 | 759.5    | Detected | 543      | Detected | 443.8    | Detected   | 808.9    | Detected   | Ago1          | 1.065042791 | 0.5843318  | 1.48968692 | 0.8173112 |

|            |          |          |          |            |          |            |          |            |               |             |            |            |           |
|------------|----------|----------|----------|------------|----------|------------|----------|------------|---------------|-------------|------------|------------|-----------|
| A_52_P3698 | 204.5    | Detected | 219.2    | Detected   | 205.3    | Detected   | 217.8    | Detected   | Fam222b       | 1.065036675 | 1.00391198 | 0.99361314 | 0.9365876 |
| A_66_P1058 | 26297.9  | Detected | 18370.4  | Detected   | 20480.2  | Detected   | 28008.2  | Detected   | Cyth2         | 1.065035611 | 0.77877701 | 1.52463746 | 1.1148478 |
| A_55_P1990 | 764.3    | Detected | 687.7    | Detected   | 956      | Detected   | 814      | Detected   | Mark2         | 1.065026822 | 1.25081774 | 1.18365566 | 1.390141  |
| A_55_P2120 | 1680.8   | Detected | 1556.6   | Detected   | 1516.6   | Detected   | 1789.9   | Detected   | Pdcd7         | 1.064909567 | 0.90230842 | 1.14987794 | 0.974303  |
| A_55_P2146 | 18.5     | Detected | 15.2     | Not Detect | 13.4     | Not Detect | 19.7     | Not Detect | Zfp763        | 1.064864865 | 0.72432432 | 1.29605263 | 0.8815789 |
| A_55_P1986 | 18412    | Detected | 14942.6  | Detected   | 20823    | Detected   | 19605.5  | Detected   | Tma7-ps       | 1.064821855 | 1.13094721 | 1.31205413 | 1.3935326 |
| A_51_P3299 | 42717.4  | Detected | 37699    | Detected   | 45017.2  | Detected   | 45484.3  | Detected   | Phlda3        | 1.064772201 | 1.05383755 | 1.20651211 | 1.1941219 |
| A_55_P2072 | 111.2    | Detected | 86.8     | Detected   | 71       | Detected   | 118.4    | Detected   | Gm10648       | 1.064748201 | 0.63848921 | 1.3640553  | 0.8179724 |
| A_51_P1089 | 4016.3   | Detected | 3317.5   | Detected   | 4596.8   | Detected   | 4276.3   | Detected   | Iars2         | 1.0647362   | 1.14453602 | 1.28901281 | 1.3856217 |
| A_55_P2085 | 15083.4  | Detected | 11201.4  | Detected   | 17455.4  | Detected   | 16059    | Detected   | Gm561         | 1.064680377 | 1.15725897 | 1.43366008 | 1.5583231 |
| A_51_P3433 | 97.5     | Detected | 96.1     | Detected   | 147.7    | Detected   | 103.8    | Detected   | Amn           | 1.064615385 | 1.51487179 | 1.08012487 | 1.5369407 |
| A_55_P2383 | 614.6    | Detected | 372      | Detected   | 430.6    | Detected   | 654.3    | Detected   | 4930422N03Rik | 1.064594858 | 0.70061829 | 1.75887097 | 1.1575269 |
| A_52_P3063 | 16955.3  | Detected | 10556    | Detected   | 6921.5   | Detected   | 18050    | Detected   | Akap2         | 1.064563883 | 0.40822044 | 1.709928   | 0.6556934 |
| A_52_P6327 | 858.1    | Detected | 696.6    | Detected   | 777.4    | Detected   | 913.5    | Detected   | Shisa5        | 1.06456124  | 0.90595502 | 1.31136951 | 1.115992  |
| A_55_P1976 | 349      | Detected | 289.2    | Detected   | 255.9    | Detected   | 371.5    | Detected   | Tmem104       | 1.064469914 | 0.73323782 | 1.28457815 | 0.8848548 |
| A_55_P2104 | 1203.1   | Detected | 1208.7   | Detected   | 1459.8   | Detected   | 1280.5   | Detected   | Rsl24d1       | 1.064333804 | 1.21336547 | 1.05940266 | 1.2077439 |
| A_55_P2087 | 547.8    | Detected | 459.5    | Detected   | 581.5    | Detected   | 583      | Detected   | Hipk1         | 1.064257028 | 1.0615188  | 1.2687704  | 1.265506  |
| A_51_P3633 | 24.9     | Detected | 36.7     | Detected   | 25.7     | Detected   | 26.5     | Not Detect | Prss41        | 1.064257028 | 1.03212851 | 0.72207084 | 0.7002725 |
| A_55_P1963 | 868.5    | Detected | 727.8    | Detected   | 759.2    | Detected   | 924.3    | Detected   | Vsig10        | 1.064248705 | 0.87415083 | 1.26999176 | 1.0431437 |
| A_55_P2086 | 336938   | Detected | 318279.8 | Detected   | 374730.4 | Detected   | 358574.6 | Detected   | Gm8580        | 1.064215375 | 1.11216426 | 1.12660181 | 1.1773616 |
| A_55_P2430 | 7519.1   | Detected | 8176.9   | Detected   | 7806.5   | Detected   | 8001.9   | Detected   | Ilf2          | 1.064209812 | 1.03822266 | 0.97859825 | 0.9547017 |
| A_51_P4144 | 7405.5   | Detected | 8610.2   | Detected   | 6387.2   | Detected   | 7880.9   | Detected   | Naa15         | 1.06419553  | 0.86249409 | 0.91529813 | 0.7418178 |
| A_55_P2006 | 88192    | Detected | 54019    | Detected   | 113937   | Detected   | 93848.5  | Detected   | Ugdh          | 1.064138471 | 1.2919199  | 1.7373239  | 2.1092023 |
| A_55_P1959 | 187.1    | Detected | 166.7    | Detected   | 145.4    | Detected   | 199.1    | Detected   | Hspg2         | 1.064136825 | 0.77712453 | 1.19436113 | 0.8722256 |
| A_55_P1960 | 652.1    | Detected | 285      | Detected   | 575.4    | Detected   | 693.9    | Detected   | 1190002N15Rik | 1.064100598 | 0.88238    | 2.43473684 | 2.0189474 |
| A_55_P2023 | 35240.3  | Detected | 33238    | Detected   | 40006    | Detected   | 37499.2  | Detected   | Arpc3         | 1.064099908 | 1.13523438 | 1.12820266 | 1.2036224 |
| A_55_P2125 | 187.4    | Detected | 167.1    | Detected   | 169.7    | Detected   | 199.4    | Detected   | Atp2b4        | 1.064034152 | 0.90554963 | 1.19329743 | 1.0155595 |
| A_51_P1336 | 39585.5  | Detected | 53935.1  | Detected   | 33858.1  | Detected   | 42118.9  | Detected   | Cdt1          | 1.063998181 | 0.85531571 | 0.78091818 | 0.6277563 |
| A_52_P2195 | 34.4     | Detected | 25.2     | Detected   | 29.4     | Detected   | 36.6     | Not Detect | A930002H24Rik | 1.063953488 | 0.85465116 | 1.45238095 | 1.1666667 |
| A_55_P2000 | 48.6     | Detected | 47.6     | Detected   | 44.8     | Detected   | 51.7     | Not Detect | Aqp4          | 1.063786008 | 0.9218107  | 1.08613445 | 0.9411765 |
| A_55_P2006 | 194406.6 | Detected | 187202   | Detected   | 192020.8 | Detected   | 206803.9 | Detected   | LOC101055815  | 1.063769954 | 0.98772778 | 1.10470989 | 1.0257412 |
| A_55_P2183 | 221253.5 | Detected | 227582.8 | Detected   | 228045.7 | Detected   | 235342.2 | Detected   | Pebp1         | 1.063676733 | 1.03069872 | 1.03409484 | 1.002034  |
| A_55_P2047 | 125033.5 | Detected | 104597.2 | Detected   | 134851.8 | Detected   | 132994.5 | Detected   | Serpinh6c     | 1.063670936 | 1.07852536 | 1.27149197 | 1.2892487 |
| A_55_P2008 | 43541.5  | Detected | 38954.9  | Detected   | 51225.7  | Detected   | 46313.3  | Detected   | Rhoa          | 1.063658808 | 1.17647991 | 1.18889536 | 1.3150002 |
| A_55_P2073 | 2059.6   | Detected | 1180     | Detected   | 3256.3   | Detected   | 2190.6   | Detected   | Abcc5         | 1.063604583 | 1.58103515 | 1.85644068 | 2.7595763 |
| A_51_P2148 | 608.7    | Detected | 693.4    | Detected   | 594.9    | Detected   | 647.4    | Detected   | Orc5          | 1.063578117 | 0.97732873 | 0.93366022 | 0.8579464 |
| A_51_P2824 | 4118.1   | Detected | 3736.6   | Detected   | 4294     | Detected   | 4379.9   | Detected   | Eapp          | 1.063573007 | 1.04271387 | 1.17216186 | 1.149173  |
| A_55_P2067 | 3572     | Detected | 3418.9   | Detected   | 3721.6   | Detected   | 3799     | Detected   | Ush1g         | 1.063549832 | 1.0418813  | 1.11117611 | 1.0885372 |
| A_55_P2041 | 521.1    | Detected | 507.4    | Detected   | 578.1    | Detected   | 554.2    | Detected   | Lrp6          | 1.063519478 | 1.109384   | 1.09223492 | 1.1393378 |
| A_55_P1968 | 13970.5  | Detected | 19144    | Detected   | 13767.2  | Detected   | 14857.7  | Detected   | Mrto4         | 1.063505243 | 0.98544791 | 0.77610217 | 0.7191392 |

|            |          |            |          |          |          |          |          |            |               |             |            |            |           |
|------------|----------|------------|----------|----------|----------|----------|----------|------------|---------------|-------------|------------|------------|-----------|
| A_55_P1985 | 152059.4 | Detected   | 158695.1 | Detected | 107540.6 | Detected | 161715.3 | Detected   | Actg1         | 1.063500842 | 0.70722757 | 1.01903146 | 0.6776555 |
| A_52_P4839 | 342      | Detected   | 370.7    | Detected | 329      | Detected | 363.7    | Detected   | Cpsf4         | 1.063450292 | 0.9619883  | 0.98111681 | 0.8875101 |
| A_52_P6682 | 772.5    | Detected   | 811.4    | Detected | 784.6    | Detected | 821.5    | Detected   | Plk4          | 1.063430421 | 1.01566343 | 1.01244762 | 0.9669707 |
| A_55_P2037 | 700      | Detected   | 596.4    | Detected | 739.6    | Detected | 744.4    | Detected   | 1700019O17Rik | 1.063428571 | 1.05657143 | 1.2481556  | 1.2401073 |
| A_51_P4250 | 66342.7  | Detected   | 62540.4  | Detected | 66206.9  | Detected | 70549.4  | Detected   | Hdgf          | 1.063408634 | 0.99795305 | 1.12806122 | 1.0586261 |
| A_55_P2042 | 55.2     | Detected   | 50.9     | Detected | 46       | Detected | 58.7     | Detected   | Aatk          | 1.063405797 | 0.83333333 | 1.15324165 | 0.9037328 |
| A_51_P2554 | 54189.3  | Detected   | 44715.3  | Detected | 68900.4  | Detected | 57618.8  | Detected   | Mrpl43        | 1.063287402 | 1.2714761  | 1.28857013 | 1.5408686 |
| A_51_P1800 | 108332.4 | Detected   | 101598.3 | Detected | 128815.2 | Detected | 115184.7 | Detected   | Shfm1         | 1.063252545 | 1.18907363 | 1.13372665 | 1.2678874 |
| A_66_P1038 | 25.3     | Detected   | 19.4     | Detected | 18.3     | Detected | 26.9     | Not Detect | Zdhhc22       | 1.063241107 | 0.72332016 | 1.38659794 | 0.943299  |
| A_55_P2059 | 114      | Detected   | 99.8     | Detected | 89.5     | Detected | 121.2    | Detected   | Gon4l         | 1.063157895 | 0.78508772 | 1.21442886 | 0.8967936 |
| A_52_P4238 | 1667.6   | Detected   | 1515.8   | Detected | 2228.1   | Detected | 1772.9   | Detected   | Tmem106c      | 1.063144639 | 1.33611178 | 1.16961341 | 1.4699169 |
| A_51_P3582 | 63.5     | Detected   | 72.8     | Detected | 73.2     | Detected | 67.5     | Detected   | Nr1i3         | 1.062992126 | 1.15275591 | 0.9271978  | 1.0054945 |
| A_55_P2063 | 47101.7  | Detected   | 59798.9  | Detected | 51521.9  | Detected | 50066.3  | Detected   | Nhp211        | 1.062940403 | 1.09384375 | 0.8372445  | 0.8615861 |
| A_55_P1976 | 20722.2  | Detected   | 23651    | Detected | 17333.5  | Detected | 22026.4  | Detected   | 4932431P20Rik | 1.062937333 | 0.83647007 | 0.93130946 | 0.7328866 |
| A_51_P1025 | 1971.3   | Detected   | 1913.4   | Detected | 1786.9   | Detected | 2095.1   | Detected   | Vps33a        | 1.062801197 | 0.90645767 | 1.09496185 | 0.9338873 |
| A_51_P3569 | 728.1    | Detected   | 835      | Detected | 606      | Detected | 773.8    | Detected   | Orc1          | 1.062766104 | 0.83230326 | 0.92670659 | 0.7257485 |
| A_55_P2045 | 3930.1   | Detected   | 3111.2   | Detected | 3338     | Detected | 4176.7   | Detected   | Enthd2        | 1.062746495 | 0.84934226 | 1.34247236 | 1.0728979 |
| A_51_P1284 | 111.8    | Detected   | 81.2     | Detected | 86.6     | Detected | 118.8    | Detected   | Dennd3        | 1.062611807 | 0.7745975  | 1.46305419 | 1.0665025 |
| A_51_P1387 | 94.4     | Detected   | 64.5     | Detected | 92.4     | Detected | 100.3    | Detected   | Prm2          | 1.0625      | 0.97881356 | 1.55503876 | 1.4325581 |
| A_55_P2022 | 11.2     | Not Detect | 18.1     | Detected | 17       | Detected | 11.9     | Not Detect | Mtf2          | 1.0625      | 1.51785714 | 0.65745856 | 0.9392265 |
| A_55_P2154 | 13239.5  | Detected   | 10545.5  | Detected | 12316.6  | Detected | 14066.1  | Detected   | Zc3hav1       | 1.062434382 | 0.93029193 | 1.33384856 | 1.1679484 |
| A_55_P2041 | 9551.3   | Detected   | 9827.8   | Detected | 10633.8  | Detected | 10146.8  | Detected   | Ezh2          | 1.062347534 | 1.11333536 | 1.03245894 | 1.0820123 |
| A_55_P2179 | 1144.3   | Detected   | 895.6    | Detected | 1312.7   | Detected | 1215.6   | Detected   | Zkscan8       | 1.062308835 | 1.14716421 | 1.35730237 | 1.4657213 |
| A_55_P2003 | 4404.4   | Detected   | 4035.5   | Detected | 3494.3   | Detected | 4678.8   | Detected   | Txlna         | 1.062301335 | 0.79336573 | 1.15941023 | 0.8658902 |
| A_55_P2016 | 454.6    | Detected   | 363.5    | Detected | 446.2    | Detected | 482.9    | Detected   | Rccd1         | 1.06225253  | 0.98152222 | 1.32847318 | 1.2275103 |
| A_55_P2121 | 102137.1 | Detected   | 108170   | Detected | 103863.8 | Detected | 108490.2 | Detected   | Gm6607        | 1.062201688 | 1.01690571 | 1.00296016 | 0.9601904 |
| A_52_P2223 | 374.8    | Detected   | 233.8    | Detected | 396.2    | Detected | 398.1    | Detected   | Vps13c        | 1.062166489 | 1.05709712 | 1.70273738 | 1.6946108 |
| A_55_P2132 | 5111.5   | Detected   | 4894.9   | Detected | 5160.3   | Detected | 5429.2   | Detected   | Fzr1          | 1.062153967 | 1.0095471  | 1.10915443 | 1.0542197 |
| A_55_P1952 | 26628.7  | Detected   | 29485.6  | Detected | 28026.7  | Detected | 28283.4  | Detected   | Rrp7a         | 1.062139721 | 1.05249975 | 0.95922756 | 0.9505216 |
| A_55_P2047 | 29989.1  | Detected   | 33450.1  | Detected | 31249.7  | Detected | 31852.3  | Detected   | LOC101055855  | 1.06212924  | 1.04203527 | 0.95223333 | 0.9342184 |
| A_51_P3701 | 2131.3   | Detected   | 2142     | Detected | 1956.8   | Detected | 2263.7   | Detected   | Ctr9          | 1.06212171  | 0.91812509 | 1.05681606 | 0.9135387 |
| A_51_P2219 | 6220.4   | Detected   | 6005.6   | Detected | 6293.9   | Detected | 6606.4   | Detected   | Csnk1g3       | 1.062053887 | 1.01181596 | 1.10003996 | 1.0480052 |
| A_55_P1979 | 19702.7  | Detected   | 21881.7  | Detected | 18936.9  | Detected | 20925.3  | Detected   | Ublcp1        | 1.062052409 | 0.96113223 | 0.95629224 | 0.8654218 |
| A_55_P2097 | 400689.6 | Detected   | 414876.1 | Detected | 417070.4 | Detected | 425547.7 | Detected   | LOC101056557  | 1.062038296 | 1.04088152 | 1.02572238 | 1.005289  |
| A_55_P2066 | 25049.5  | Detected   | 19822.1  | Detected | 25939.5  | Detected | 26602.8  | Detected   | Sh3glb1       | 1.062009222 | 1.03552965 | 1.34207778 | 1.3086151 |
| A_55_P2052 | 12254.8  | Detected   | 14373.1  | Detected | 10154.3  | Detected | 13014.2  | Detected   | Gm5237        | 1.061967556 | 0.82859777 | 0.90545533 | 0.7064795 |
| A_55_P2158 | 60464.6  | Detected   | 56652.7  | Detected | 62589.7  | Detected | 64211.2  | Detected   | Hist1h4d      | 1.061963529 | 1.03514618 | 1.13341818 | 1.1047964 |
| A_51_P1925 | 38818.9  | Detected   | 43880.9  | Detected | 37932.2  | Detected | 41220.8  | Detected   | Pno1          | 1.061874499 | 0.97715803 | 0.93937909 | 0.8644353 |
| A_55_P2345 | 111.7    | Detected   | 162.7    | Detected | 158.5    | Detected | 118.6    | Detected   | Sat2          | 1.061772605 | 1.41897941 | 0.72894899 | 0.9741856 |
| A_55_P2155 | 8904     | Detected   | 8163     | Detected | 7181.7   | Detected | 9453.6   | Detected   | Ccdc23        | 1.061725067 | 0.80657008 | 1.15810364 | 0.8797868 |

|            |          |            |          |            |          |            |          |            |               |             |            |            |           |
|------------|----------|------------|----------|------------|----------|------------|----------|------------|---------------|-------------|------------|------------|-----------|
| A_51_P2785 | 7977.8   | Detected   | 8589.5   | Detected   | 10215.9  | Detected   | 8469.9   | Detected   | Myg1          | 1.061683672 | 1.280541   | 0.98607602 | 1.1893475 |
| A_52_P2961 | 950.5    | Detected   | 791.9    | Detected   | 918      | Detected   | 1009.1   | Detected   | Cstf1         | 1.061651762 | 0.96580747 | 1.27427706 | 1.1592373 |
| A_55_P2114 | 73       | Detected   | 84.7     | Detected   | 57.1     | Detected   | 77.5     | Detected   | Arntl2        | 1.061643836 | 0.78219178 | 0.9149941  | 0.674144  |
| A_52_P7166 | 92.5     | Detected   | 120.1    | Detected   | 108.7    | Detected   | 98.2     | Detected   | Dnajc27       | 1.061621622 | 1.17513514 | 0.81765196 | 0.9050791 |
| A_55_P2090 | 143      | Detected   | 158.9    | Detected   | 85.6     | Detected   | 151.8    | Detected   | Mrpl39        | 1.061538462 | 0.5986014  | 0.95531781 | 0.5387036 |
| A_52_P2829 | 6496.4   | Detected   | 4329.6   | Detected   | 5647     | Detected   | 6896.1   | Detected   | Yeats2        | 1.061526384 | 0.86925066 | 1.59277993 | 1.3042775 |
| A_55_P2093 | 37.4     | Detected   | 32.9     | Detected   | 24.9     | Detected   | 39.7     | Not Detect | Dennd4a       | 1.061497326 | 0.6657754  | 1.20668693 | 0.7568389 |
| A_55_P2158 | 506.1    | Detected   | 471.9    | Detected   | 484.8    | Detected   | 537.2    | Detected   | Gdf3          | 1.061450306 | 0.95791346 | 1.13837677 | 1.0273363 |
| A_55_P2089 | 3271.4   | Detected   | 3650.8   | Detected   | 2935.9   | Detected   | 3472.4   | Detected   | Coq10b        | 1.061441585 | 0.89744452 | 0.951134   | 0.8041799 |
| A_51_P1251 | 14833.4  | Detected   | 13075.9  | Detected   | 22233.3  | Detected   | 15741.9  | Detected   | Cdca5         | 1.061246916 | 1.49886742 | 1.20388654 | 1.7003266 |
| A_55_P2054 | 9457.5   | Detected   | 8940.9   | Detected   | 13176.6  | Detected   | 10036.5  | Detected   | Clpb          | 1.061221253 | 1.39324346 | 1.122538   | 1.4737443 |
| A_51_P5094 | 1897.3   | Detected   | 2210.6   | Detected   | 1749.2   | Detected   | 2013.4   | Detected   | Kras          | 1.061192221 | 0.92194171 | 0.91079345 | 0.7912784 |
| A_51_P4744 | 19312.3  | Detected   | 20491.2  | Detected   | 18198.3  | Detected   | 20493.5  | Detected   | Utp11l        | 1.061163093 | 0.94231655 | 1.00011224 | 0.8881032 |
| A_55_P2035 | 13543.8  | Detected   | 15042.2  | Detected   | 14538.3  | Detected   | 14371.7  | Detected   | Srp19         | 1.061127601 | 1.07342843 | 0.9554254  | 0.9665009 |
| A_55_P2035 | 219.4    | Detected   | 247.6    | Detected   | 326.2    | Detected   | 232.8    | Detected   | Reg3d         | 1.061075661 | 1.48678213 | 0.94022617 | 1.3174475 |
| A_55_P2100 | 5239.9   | Detected   | 4679.9   | Detected   | 5025.8   | Detected   | 5559.9   | Detected   | Gm12216       | 1.061069868 | 0.95914044 | 1.18803821 | 1.0739118 |
| A_55_P2146 | 771.6    | Detected   | 910.4    | Detected   | 652.4    | Detected   | 818.7    | Detected   | Ropn1l        | 1.061041991 | 0.84551581 | 0.89927504 | 0.7166081 |
| A_66_P1113 | 8.2      | Not Detect | 18.5     | Detected   | 11.9     | Not Detect | 8.7      | Not Detect | Rax           | 1.06097561  | 1.45121951 | 0.47027027 | 0.6432432 |
| A_55_P2255 | 27.9     | Detected   | 26.2     | Detected   | 17.4     | Not Detect | 29.6     | Not Detect | D7Bwg0826e    | 1.0609319   | 0.62365591 | 1.12977099 | 0.6641221 |
| A_51_P5117 | 1561.1   | Detected   | 1636.2   | Detected   | 1361.5   | Detected   | 1656.2   | Detected   | Snip1         | 1.060918583 | 0.87214144 | 1.01222344 | 0.832111  |
| A_66_P1072 | 19.7     | Detected   | 11.4     | Not Detect | 10.4     | Not Detect | 20.9     | Not Detect | Gm14168       | 1.060913706 | 0.52791878 | 1.83333333 | 0.9122807 |
| A_51_P1496 | 5135.9   | Detected   | 3472.8   | Detected   | 6044.7   | Detected   | 5448.7   | Detected   | Stt3b         | 1.060904613 | 1.17695049 | 1.56896452 | 1.740584  |
| A_55_P2015 | 59375.4  | Detected   | 63963.3  | Detected   | 59425.5  | Detected   | 62989.5  | Detected   | 0610010K14Rik | 1.060868643 | 1.00084378 | 0.98477564 | 0.9290562 |
| A_55_P2004 | 1597.3   | Detected   | 1222.4   | Detected   | 1246.6   | Detected   | 1694.5   | Detected   | Gm7102        | 1.060852689 | 0.780442   | 1.38620746 | 1.0197971 |
| A_51_P3999 | 1084.8   | Detected   | 1095.4   | Detected   | 1179.4   | Detected   | 1150.8   | Detected   | Mier2         | 1.060840708 | 1.08720501 | 1.05057513 | 1.0766843 |
| A_52_P4941 | 3875.7   | Detected   | 2593.6   | Detected   | 4585.6   | Detected   | 4111.4   | Detected   | Usp46         | 1.060814821 | 1.18316691 | 1.58520975 | 1.7680444 |
| A_51_P2587 | 14.8     | Not Detect | 19.4     | Detected   | 15.6     | Not Detect | 15.7     | Not Detect | 4930415O20Rik | 1.060810811 | 1.05405405 | 0.80927835 | 0.8041237 |
| A_52_P6352 | 2119.7   | Detected   | 1723     | Detected   | 1924.9   | Detected   | 2248.6   | Detected   | Btbd6         | 1.060810492 | 0.9081002  | 1.30504933 | 1.1171793 |
| A_55_P2173 | 37109.9  | Detected   | 34062.2  | Detected   | 30799.5  | Detected   | 39365.8  | Detected   | Dnase2a       | 1.060789708 | 0.82995373 | 1.15570339 | 0.9042135 |
| A_55_P2024 | 16137.6  | Detected   | 14009.6  | Detected   | 16797.4  | Detected   | 17118.3  | Detected   | Prkacb        | 1.060771118 | 1.04088588 | 1.22189784 | 1.1989921 |
| A_52_P3301 | 4625.7   | Detected   | 4560     | Detected   | 4434.5   | Detected   | 4906.8   | Detected   | Ppp1r8        | 1.060769181 | 0.95866572 | 1.07605263 | 0.9724781 |
| A_55_P2011 | 8236.6   | Detected   | 6032.4   | Detected   | 8663.3   | Detected   | 8737     | Detected   | 9-Mar         | 1.060753223 | 1.05180536 | 1.4483456  | 1.4361282 |
| A_51_P3974 | 85.6     | Detected   | 118.8    | Detected   | 98.6     | Detected   | 90.8     | Detected   | Rundc3a       | 1.060747664 | 1.15186916 | 0.76430976 | 0.8299663 |
| A_51_P4615 | 1150.7   | Detected   | 620.4    | Detected   | 798.5    | Detected   | 1220.6   | Detected   | Eef2k         | 1.060745633 | 0.69392544 | 1.96744036 | 1.2870729 |
| A_52_P1587 | 1819.6   | Detected   | 1961.1   | Detected   | 3455.4   | Detected   | 1930     | Detected   | Dcbld1        | 1.060672675 | 1.89898879 | 0.98414155 | 1.7619703 |
| A_51_P3639 | 102722.4 | Detected   | 128567.6 | Detected   | 114292.6 | Detected   | 108950.4 | Detected   | Cct2          | 1.060629425 | 1.11263561 | 0.84741723 | 0.8889689 |
| A_55_P2058 | 20830    | Detected   | 27966.6  | Detected   | 14559.8  | Detected   | 22091.1  | Detected   | Sgpp1         | 1.060542487 | 0.69898224 | 0.78991011 | 0.5206139 |
| A_52_P6449 | 4990.5   | Detected   | 5683.7   | Detected   | 6206     | Detected   | 5292.5   | Detected   | Mzt1          | 1.060514978 | 1.24356277 | 0.9311716  | 1.0918944 |
| A_55_P2112 | 600      | Detected   | 852.4    | Detected   | 371.3    | Detected   | 636.3    | Detected   | Nhsl1         | 1.0605      | 0.61883333 | 0.74648053 | 0.4355936 |
| A_52_P3819 | 1580.2   | Detected   | 1376     | Detected   | 1889.4   | Detected   | 1675.7   | Detected   | Irf2bp1       | 1.060435388 | 1.19567143 | 1.21780523 | 1.3731105 |

|            |          |          |          |          |          |          |          |            |               |             |            |            |           |
|------------|----------|----------|----------|----------|----------|----------|----------|------------|---------------|-------------|------------|------------|-----------|
| A_55_P1955 | 67.9     | Detected | 73.5     | Detected | 73.1     | Detected | 72       | Detected   | Cmtm5         | 1.060382916 | 1.07658321 | 0.97959184 | 0.9945578 |
| A_55_P2056 | 220.3    | Detected | 120      | Detected | 153.9    | Detected | 233.6    | Detected   | Akap13        | 1.06037222  | 0.69859283 | 1.94666667 | 1.2825    |
| A_51_P4732 | 2386.9   | Detected | 2218.1   | Detected | 3169.8   | Detected | 2530.9   | Detected   | Siae          | 1.060329297 | 1.32799866 | 1.1410216  | 1.4290609 |
| A_52_P3166 | 16027.7  | Detected | 14025.6  | Detected | 16822.7  | Detected | 16994.6  | Detected   | Ost4          | 1.060326809 | 1.04960163 | 1.21168435 | 1.1994282 |
| A_55_P2094 | 2605     | Detected | 2695.1   | Detected | 3029.6   | Detected | 2762     | Detected   | Ssbp1         | 1.060268714 | 1.16299424 | 1.02482283 | 1.1241141 |
| A_55_P2057 | 512.8    | Detected | 474.9    | Detected | 646.4    | Detected | 543.7    | Detected   | Zfp282        | 1.06025741  | 1.26053042 | 1.1448726  | 1.3611287 |
| A_55_P2018 | 18.3     | Detected | 23.2     | Detected | 27.6     | Detected | 19.4     | Not Detect | Hdhd2         | 1.06010929  | 1.50819672 | 0.8362069  | 1.1896552 |
| A_51_P3368 | 68956.2  | Detected | 65164.2  | Detected | 77816.6  | Detected | 73100    | Detected   | Atp6v0e       | 1.060093219 | 1.12849316 | 1.12178159 | 1.1941618 |
| A_55_P2166 | 168.1    | Detected | 160.4    | Detected | 143      | Detected | 178.2    | Detected   | Gpr6          | 1.060083284 | 0.85068412 | 1.11097257 | 0.8915212 |
| A_51_P4043 | 1223.7   | Detected | 808.9    | Detected | 1264.5   | Detected | 1297.2   | Detected   | Rnd2          | 1.060063741 | 1.03334151 | 1.60365929 | 1.563234  |
| A_55_P1953 | 1612.4   | Detected | 1416.6   | Detected | 1689.8   | Detected | 1709.2   | Detected   | Mccc2         | 1.060034731 | 1.04800298 | 1.2065509  | 1.1928561 |
| A_55_P2368 | 131.6    | Detected | 195      | Detected | 87.3     | Detected | 139.5    | Detected   | 3110035C09Rik | 1.060030395 | 0.66337386 | 0.71538462 | 0.4476923 |
| A_51_P3888 | 19470.7  | Detected | 15034.1  | Detected | 19856    | Detected | 20638.9  | Detected   | Tbcc          | 1.059997843 | 1.01978871 | 1.37280582 | 1.3207309 |
| A_52_P3523 | 541.7    | Detected | 424.7    | Detected | 371.2    | Detected | 574.2    | Detected   | Gm7265        | 1.059996308 | 0.68525014 | 1.35201319 | 0.8740287 |
| A_55_P2155 | 231924.8 | Detected | 244251.6 | Detected | 282409.6 | Detected | 245813.7 | Detected   | Rps27         | 1.059885359 | 1.21767745 | 1.00639545 | 1.1562242 |
| A_55_P2016 | 806.6    | Detected | 913.9    | Detected | 353.8    | Detected | 854.9    | Detected   | Isl2          | 1.059880982 | 0.43863129 | 0.93544151 | 0.3871321 |
| A_51_P1381 | 4948.3   | Detected | 4745.5   | Detected | 5063.8   | Detected | 5244.3   | Detected   | Angel2        | 1.059818524 | 1.02334135 | 1.1051101  | 1.0670741 |
| A_55_P1961 | 2764.2   | Detected | 3583.8   | Detected | 3176.9   | Detected | 2929.5   | Detected   | Twistnb       | 1.059800304 | 1.14930179 | 0.81742843 | 0.8864613 |
| A_51_P1164 | 963.3    | Detected | 799.2    | Detected | 812.5    | Detected | 1020.9   | Detected   | Xpo6          | 1.059794457 | 0.84345479 | 1.2774024  | 1.0166416 |
| A_55_P2024 | 118.8    | Detected | 118.3    | Detected | 111.8    | Detected | 125.9    | Detected   | Ank2          | 1.05976431  | 0.94107744 | 1.06424345 | 0.9450549 |
| A_55_P2174 | 30798.1  | Detected | 25772.1  | Detected | 32455.8  | Detected | 32638.6  | Detected   | Cuta          | 1.05976018  | 1.05382475 | 1.26643153 | 1.2593386 |
| A_55_P2029 | 3054.2   | Detected | 3870.1   | Detected | 2539.3   | Detected | 3236.6   | Detected   | Gab3          | 1.05972104  | 0.83141248 | 0.83630914 | 0.6561329 |
| A_55_P2022 | 28.5     | Detected | 21.5     | Detected | 32.8     | Detected | 30.2     | Not Detect | Zfp646        | 1.059649123 | 1.15087719 | 1.40465116 | 1.5255814 |
| A_55_P2148 | 5883     | Detected | 4996.1   | Detected | 6338.7   | Detected | 6233.9   | Detected   | Klh125        | 1.059646439 | 1.07746048 | 1.24775325 | 1.2687296 |
| A_55_P2008 | 159.3    | Detected | 133.8    | Detected | 156.9    | Detected | 168.8    | Detected   | Gm10034       | 1.059635907 | 0.98493409 | 1.26158445 | 1.1726457 |
| A_55_P2006 | 21.8     | Detected | 29.7     | Detected | 27.3     | Detected | 23.1     | Not Detect | Olfr282       | 1.059633028 | 1.25229358 | 0.77777778 | 0.9191919 |
| A_55_P2372 | 115.9    | Detected | 106.7    | Detected | 101      | Detected | 122.8    | Detected   | Lhx4          | 1.059534081 | 0.8714409  | 1.15089035 | 0.9465792 |
| A_51_P1996 | 2776.8   | Detected | 2955.4   | Detected | 3401.6   | Detected | 2942.1   | Detected   | Ttll1         | 1.059528954 | 1.2250072  | 0.99549976 | 1.1509779 |
| A_55_P2025 | 307.6    | Detected | 335.1    | Detected | 326.5    | Detected | 325.9    | Detected   | Gas1          | 1.059492848 | 1.06144343 | 0.97254551 | 0.974336  |
| A_55_P2179 | 2162.4   | Detected | 2327.4   | Detected | 3390.1   | Detected | 2290.9   | Detected   | Mettl18       | 1.059424713 | 1.5677488  | 0.98431726 | 1.4566039 |
| A_55_P2058 | 257.5    | Detected | 221.3    | Detected | 248.6    | Detected | 272.8    | Detected   | Scgb2b20      | 1.059417476 | 0.96543689 | 1.23271577 | 1.123362  |
| A_51_P3445 | 78053    | Detected | 64847.6  | Detected | 72939.2  | Detected | 82688.6  | Detected   | Plk1          | 1.059390414 | 0.93448298 | 1.27512198 | 1.1247787 |
| A_55_P2090 | 491.7    | Detected | 456.2    | Detected | 470.1    | Detected | 520.9    | Detected   | Thrap3        | 1.059385804 | 0.95607077 | 1.14182376 | 1.0304691 |
| A_55_P2008 | 2516     | Detected | 2648.2   | Detected | 2389.6   | Detected | 2665.3   | Detected   | Cbll1         | 1.059340223 | 0.94976153 | 1.00645722 | 0.9023488 |
| A_51_P1727 | 26626.9  | Detected | 33004.5  | Detected | 26848    | Detected | 28204.8  | Detected   | Gpatch4       | 1.059259621 | 1.00830363 | 0.85457438 | 0.8134648 |
| A_52_P5127 | 1373.5   | Detected | 1122     | Detected | 1634.7   | Detected | 1454.8   | Detected   | Ears2         | 1.059191846 | 1.1901711  | 1.29661319 | 1.4569519 |
| A_55_P2239 | 310.9    | Detected | 281.8    | Detected | 214.1    | Detected | 329.3    | Detected   | Gpatch8       | 1.059183017 | 0.68864587 | 1.16855926 | 0.7597587 |
| A_55_P1976 | 37776.5  | Detected | 32513.1  | Detected | 33336.4  | Detected | 40009.1  | Detected   | Gm14378       | 1.059100234 | 0.88246397 | 1.23055322 | 1.0253221 |
| A_55_P1958 | 265.7    | Detected | 228.7    | Detected | 234.5    | Detected | 281.4    | Detected   | Olfr1347      | 1.059089198 | 0.88257433 | 1.23043288 | 1.0253607 |
| A_55_P2014 | 125.3    | Detected | 91.5     | Detected | 110.6    | Detected | 132.7    | Detected   | N28178        | 1.05905826  | 0.88268156 | 1.45027322 | 1.2087432 |

|            |          |            |          |          |          |            |          |            |               |             |            |            |           |
|------------|----------|------------|----------|----------|----------|------------|----------|------------|---------------|-------------|------------|------------|-----------|
| A_55_P1989 | 339432.8 | Detected   | 381618.8 | Detected | 381370.7 | Detected   | 359469.3 | Detected   | Rps12         | 1.059029357 | 1.12355288 | 0.9419591  | 0.9993499 |
| A_66_P1020 | 108.5    | Detected   | 95.4     | Detected | 55.8     | Detected   | 114.9    | Detected   | Gm4123        | 1.058986175 | 0.51428571 | 1.20440252 | 0.5849057 |
| A_55_P2110 | 2494.2   | Detected   | 2475.2   | Detected | 3576     | Detected   | 2641.3   | Detected   | Zfp637        | 1.058976826 | 1.43372624 | 1.06710569 | 1.4447317 |
| A_55_P1966 | 7968.2   | Detected   | 5607.3   | Detected | 5622.8   | Detected   | 8437.8   | Detected   | Cdc14b        | 1.058934264 | 0.70565498 | 1.5047884  | 1.0027643 |
| A_55_P2060 | 130168.5 | Detected   | 120554.2 | Detected | 135453.5 | Detected   | 137839.7 | Detected   | Pkm           | 1.058932845 | 1.04060122 | 1.14338364 | 1.1235901 |
| A_55_P2077 | 7005.8   | Detected   | 5955     | Detected | 6876     | Detected   | 7418.6   | Detected   | Ube2v2        | 1.058922607 | 0.98147249 | 1.24577666 | 1.1546599 |
| A_55_P2177 | 271.7    | Detected   | 283.7    | Detected | 281.5    | Detected   | 287.7    | Detected   | Tmem69        | 1.05888848  | 1.03606919 | 1.0140994  | 0.9922453 |
| A_51_P3589 | 2049.8   | Detected   | 2024.9   | Detected | 1923.3   | Detected   | 2170.5   | Detected   | U2af2         | 1.058883794 | 0.93828666 | 1.07190479 | 0.9498247 |
| A_52_P5073 | 1801.4   | Detected   | 1375.3   | Detected | 1989     | Detected   | 1907.4   | Detected   | Iah1          | 1.058843122 | 1.10414122 | 1.3868974  | 1.4462299 |
| A_55_P1986 | 8.5      | Not Detect | 17.6     | Detected | 7.4      | Not Detect | 9        | Not Detect | Gm8075        | 1.058823529 | 0.87058824 | 0.51136364 | 0.4204545 |
| A_55_P2043 | 666.9    | Detected   | 531.9    | Detected | 701.1    | Detected   | 706.1    | Detected   | Rnf26         | 1.058779427 | 1.05128205 | 1.32750517 | 1.3181049 |
| A_55_P2103 | 17331.8  | Detected   | 11207    | Detected | 21047.1  | Detected   | 18349.5  | Detected   | Tor1aip2      | 1.058718656 | 1.21436319 | 1.63732489 | 1.8780316 |
| A_51_P2452 | 30174.5  | Detected   | 21465.6  | Detected | 37534.8  | Detected   | 31943    | Detected   | H2afx         | 1.05860909  | 1.24392451 | 1.48810189 | 1.7486024 |
| A_66_P1221 | 9043.8   | Detected   | 7600.6   | Detected | 8240.9   | Detected   | 9573.1   | Detected   | Wdr26         | 1.058526283 | 0.91122095 | 1.25951899 | 1.0842433 |
| A_55_P2154 | 3825.6   | Detected   | 4678     | Detected | 3245.3   | Detected   | 4049.4   | Detected   | Gcm1          | 1.058500627 | 0.84831138 | 0.86562634 | 0.6937366 |
| A_55_P2142 | 371629.1 | Detected   | 365509.5 | Detected | 350135.8 | Detected   | 393344   | Detected   | Rpl10         | 1.058431646 | 0.94216465 | 1.0761526  | 0.957939  |
| A_55_P2128 | 1963.5   | Detected   | 1987.4   | Detected | 1957.5   | Detected   | 2078.2   | Detected   | Ubp2l         | 1.058416094 | 0.99694423 | 1.04568783 | 0.9849552 |
| A_55_P2098 | 1166.6   | Detected   | 994.5    | Detected | 1398.5   | Detected   | 1234.7   | Detected   | C1rl          | 1.058374764 | 1.19878279 | 1.24152841 | 1.4062343 |
| A_51_P5146 | 12723.6  | Detected   | 12102.5  | Detected | 17144.4  | Detected   | 13465.8  | Detected   | Paip2         | 1.058332547 | 1.34744884 | 1.11264615 | 1.4165999 |
| A_55_P1975 | 337.8    | Detected   | 314.9    | Detected | 264.5    | Detected   | 357.5    | Detected   | Ylpm1         | 1.058318532 | 0.7830077  | 1.13528104 | 0.8399492 |
| A_51_P2118 | 7217.8   | Detected   | 6407.6   | Detected | 5677.2   | Detected   | 7638.5   | Detected   | Neur14        | 1.058286458 | 0.78655546 | 1.19210001 | 0.8860104 |
| A_55_P1991 | 45473.9  | Detected   | 51889.2  | Detected | 40091.9  | Detected   | 48123.5  | Detected   | LOC101056478  | 1.05826639  | 0.88164639 | 0.92742806 | 0.7726444 |
| A_55_P2037 | 61.8     | Detected   | 62       | Detected | 41.5     | Detected   | 65.4     | Detected   | Alad          | 1.058252427 | 0.67152104 | 1.05483871 | 0.6693548 |
| A_51_P5195 | 489.4    | Detected   | 473.7    | Detected | 454.6    | Detected   | 517.9    | Detected   | Srsf10        | 1.058234573 | 0.92889252 | 1.093308   | 0.9596791 |
| A_55_P1979 | 36.1     | Detected   | 23       | Detected | 19.6     | Detected   | 38.2     | Not Detect | Cd28          | 1.058171745 | 0.54293629 | 1.66086957 | 0.8521739 |
| A_55_P1997 | 2596.4   | Detected   | 2086.5   | Detected | 2006.8   | Detected   | 2747.4   | Detected   | Htatsf1       | 1.058157449 | 0.77291635 | 1.31675054 | 0.9618021 |
| A_55_P1968 | 4190.1   | Detected   | 3655.2   | Detected | 4178.1   | Detected   | 4433.5   | Detected   | Tmub2         | 1.058089306 | 0.99713611 | 1.21292953 | 1.1430565 |
| A_51_P2235 | 1287.9   | Detected   | 1199.8   | Detected | 1638.4   | Detected   | 1362.7   | Detected   | C030046E11Rik | 1.058079043 | 1.27214846 | 1.13577263 | 1.3655609 |
| A_51_P4583 | 24116.4  | Detected   | 27984.3  | Detected | 25161.3  | Detected   | 25515.6  | Detected   | Slc38a2       | 1.05801861  | 1.04332736 | 0.91178268 | 0.899122  |
| A_55_P2121 | 197990.3 | Detected   | 209286.7 | Detected | 199693.5 | Detected   | 209471.9 | Detected   | Gm4997        | 1.05799072  | 1.00860244 | 1.00088491 | 0.9541624 |
| A_66_P1186 | 24039.3  | Detected   | 30025.1  | Detected | 26706.9  | Detected   | 25433.3  | Detected   | Nup107        | 1.057988377 | 1.11096829 | 0.84706795 | 0.8894858 |
| A_51_P2050 | 21770.5  | Detected   | 19630.7  | Detected | 19257.5  | Detected   | 23032.6  | Detected   | Dazap1        | 1.057972945 | 0.88456857 | 1.17329489 | 0.980989  |
| A_55_P2134 | 19576    | Detected   | 10875.9  | Detected | 21979.4  | Detected   | 20709.4  | Detected   | Foxa2         | 1.057897425 | 1.12277278 | 1.90415506 | 2.020927  |
| A_55_P1963 | 1700.9   | Detected   | 1772.7   | Detected | 1999.1   | Detected   | 1799.2   | Detected   | Prh1          | 1.057792933 | 1.17531895 | 1.01494895 | 1.1277148 |
| A_51_P4764 | 22.5     | Detected   | 20.2     | Detected | 19.4     | Detected   | 23.8     | Not Detect | Olf456        | 1.057777778 | 0.86222222 | 1.17821782 | 0.960396  |
| A_55_P2160 | 32.9     | Detected   | 31.6     | Detected | 56.7     | Detected   | 34.8     | Not Detect | Zfp940        | 1.05775076  | 1.72340426 | 1.10126582 | 1.7943038 |
| A_55_P1977 | 10.4     | Not Detect | 23.2     | Detected | 5.9      | Not Detect | 11       | Not Detect | Pappa         | 1.057692308 | 0.56730769 | 0.47413793 | 0.2543103 |
| A_52_P3603 | 328      | Detected   | 183.8    | Detected | 272.6    | Detected   | 346.9    | Detected   | Map1b         | 1.057621951 | 0.83109756 | 1.88737758 | 1.4831338 |
| A_55_P1991 | 5824.7   | Detected   | 4259.6   | Detected | 5437.4   | Detected   | 6160.3   | Detected   | Blvrb         | 1.057616701 | 0.93350731 | 1.44621561 | 1.2765048 |
| A_55_P2034 | 326.3    | Detected   | 383.6    | Detected | 324.6    | Detected   | 345.1    | Detected   | Jtb           | 1.057615691 | 0.99479007 | 0.89963504 | 0.846194  |

|            |          |            |          |          |          |          |          |            |           |             |            |            |           |
|------------|----------|------------|----------|----------|----------|----------|----------|------------|-----------|-------------|------------|------------|-----------|
| A_55_P2082 | 1028.2   | Detected   | 881.3    | Detected | 1148.9   | Detected | 1087.4   | Detected   | Kidins220 | 1.057576347 | 1.11738961 | 1.23385907 | 1.3036423 |
| A_66_P1047 | 4089.1   | Detected   | 3961.1   | Detected | 3980     | Detected | 4324.4   | Detected   | Lrp5      | 1.057543225 | 0.97331931 | 1.09171695 | 1.0047714 |
| A_55_P1961 | 26547.6  | Detected   | 26865.3  | Detected | 26556.8  | Detected | 28073.4  | Detected   | Fbxw11    | 1.057474122 | 1.00034655 | 1.04496879 | 0.9885168 |
| A_55_P2172 | 22080.5  | Detected   | 18912.6  | Detected | 20438.8  | Detected | 23348.2  | Detected   | Timm17b   | 1.057412649 | 0.92564933 | 1.23453148 | 1.0806975 |
| A_55_P2046 | 12.2     | Not Detect | 20.1     | Detected | 81.7     | Detected | 12.9     | Not Detect | Piwil4    | 1.057377049 | 6.69672131 | 0.64179104 | 4.0646766 |
| A_52_P5896 | 1734.5   | Detected   | 2138     | Detected | 1782.1   | Detected | 1834     | Detected   | Polr3a    | 1.057365235 | 1.02744307 | 0.85781104 | 0.833536  |
| A_55_P2116 | 47426.2  | Detected   | 38216.3  | Detected | 48299.3  | Detected | 50146.7  | Detected   | Hnrnpdl   | 1.057362808 | 1.01840966 | 1.31218093 | 1.2638403 |
| A_51_P5038 | 476.6    | Detected   | 562.3    | Detected | 291.8    | Detected | 503.9    | Detected   | Plekhg4   | 1.057280739 | 0.61225346 | 0.89614085 | 0.5189401 |
| A_55_P2053 | 16098.6  | Detected   | 11554    | Detected | 20203.1  | Detected | 17018.7  | Detected   | Chuk      | 1.057154038 | 1.25496006 | 1.4729704  | 1.7485806 |
| A_55_P2111 | 15188.4  | Detected   | 20096.7  | Detected | 14711.2  | Detected | 16056.2  | Detected   | Gemin5    | 1.057135709 | 0.96858129 | 0.79894709 | 0.7320207 |
| A_55_P2100 | 85620.8  | Detected   | 89463    | Detected | 93995.7  | Detected | 90503.8  | Detected   | Nme1      | 1.057030535 | 1.09781385 | 1.01163386 | 1.0506656 |
| A_52_P9767 | 1279.7   | Detected   | 1329.2   | Detected | 1235.9   | Detected | 1352.6   | Detected   | Atad2b    | 1.056966477 | 0.96577323 | 1.01760457 | 0.9298074 |
| A_52_P8303 | 1106.2   | Detected   | 941.6    | Detected | 1148.4   | Detected | 1169.2   | Detected   | Iba57     | 1.056951727 | 1.03814862 | 1.24171623 | 1.2196262 |
| A_51_P2590 | 5262.3   | Detected   | 4256.7   | Detected | 3559.1   | Detected | 5561.5   | Detected   | Cacnb3    | 1.056857268 | 0.67633924 | 1.30652853 | 0.8361172 |
| A_55_P2127 | 6831.4   | Detected   | 6037.6   | Detected | 7795.3   | Detected | 7219.7   | Detected   | Timm50    | 1.056840472 | 1.14109846 | 1.19578972 | 1.2911256 |
| A_66_P1331 | 183.1    | Detected   | 178.9    | Detected | 201.8    | Detected | 193.5    | Detected   | Gm14635   | 1.056799563 | 1.10212998 | 1.08160984 | 1.1280045 |
| A_51_P2901 | 18720.4  | Detected   | 20727    | Detected | 19649.9  | Detected | 19778.6  | Detected   | Dlst      | 1.05652657  | 1.04965172 | 0.95424326 | 0.948034  |
| A_66_P1006 | 14464.1  | Detected   | 11892.6  | Detected | 15959    | Detected | 15281.7  | Detected   | Ensa      | 1.056526158 | 1.10335244 | 1.28497553 | 1.3419269 |
| A_55_P2093 | 5540.9   | Detected   | 4268     | Detected | 5459.5   | Detected | 5854.1   | Detected   | Rnf111    | 1.056525113 | 0.98530925 | 1.37162605 | 1.2791706 |
| A_51_P3745 | 384      | Detected   | 394.2    | Detected | 323.5    | Detected | 405.7    | Detected   | Spata1    | 1.056510417 | 0.84244792 | 1.02917301 | 0.8206494 |
| A_51_P3963 | 626.5    | Detected   | 790.4    | Detected | 769.6    | Detected | 661.9    | Detected   | Mars2     | 1.056504389 | 1.22841181 | 0.83742409 | 0.9736842 |
| A_52_P2404 | 872.6    | Detected   | 745.1    | Detected | 959.3    | Detected | 921.9    | Detected   | Ap1ar     | 1.056497823 | 1.09935824 | 1.23728359 | 1.2874782 |
| A_51_P3893 | 8067.3   | Detected   | 9043.1   | Detected | 9352.2   | Detected | 8522.9   | Detected   | Nsmce2    | 1.056474905 | 1.15927262 | 0.94247548 | 1.0341808 |
| A_55_P2185 | 10247.9  | Detected   | 9407.3   | Detected | 9441.4   | Detected | 10825.6  | Detected   | Tle2      | 1.056372525 | 0.92130095 | 1.15076589 | 1.0036248 |
| A_55_P2082 | 285156.7 | Detected   | 273690.8 | Detected | 268430.5 | Detected | 301208.9 | Detected   | Ndor1     | 1.056292558 | 0.94134383 | 1.10054448 | 0.9807801 |
| A_55_P2037 | 753.3    | Detected   | 567.3    | Detected | 449.7    | Detected | 795.7    | Detected   | Elmsan1   | 1.056285676 | 0.59697332 | 1.40260885 | 0.7927023 |
| A_51_P4627 | 5304.3   | Detected   | 5779.2   | Detected | 4873.6   | Detected | 5602.8   | Detected   | Tex10     | 1.056275098 | 0.91880173 | 0.96947674 | 0.8433001 |
| A_55_P2046 | 211.5    | Detected   | 157.3    | Detected | 182.6    | Detected | 223.4    | Detected   | Adamts8   | 1.056264775 | 0.86335697 | 1.42021615 | 1.1608392 |
| A_55_P2094 | 3535.7   | Detected   | 3388     | Detected | 3029.9   | Detected | 3734     | Detected   | Rabep1    | 1.056085075 | 0.85694488 | 1.10212515 | 0.8943034 |
| A_55_P2404 | 103.5    | Detected   | 125.4    | Detected | 68.3     | Detected | 109.3    | Detected   | LOC552909 | 1.056038647 | 0.65990338 | 0.87161085 | 0.5446571 |
| A_51_P1774 | 209.3    | Detected   | 198      | Detected | 185.7    | Detected | 221      | Detected   | Rmi2      | 1.055900621 | 0.88724319 | 1.11616162 | 0.9378788 |
| A_51_P3914 | 1167.3   | Detected   | 1141.9   | Detected | 1383.3   | Detected | 1232.5   | Detected   | Pola2     | 1.055855393 | 1.18504241 | 1.07934145 | 1.211402  |
| A_55_P2032 | 10233    | Detected   | 11238.3  | Detected | 11401.9  | Detected | 10804.1  | Detected   | Tm9sf2    | 1.055809635 | 1.11422848 | 0.96136426 | 1.0145574 |
| A_55_P2172 | 52       | Detected   | 114.5    | Detected | 36.4     | Detected | 54.9     | Detected   | Ptplad2   | 1.055769231 | 0.7        | 0.47947598 | 0.3179039 |
| A_51_P3744 | 72085.8  | Detected   | 37630.6  | Detected | 70993.6  | Detected | 76104.6  | Detected   | Gstp1     | 1.055750231 | 0.98484861 | 2.02241261 | 1.8865923 |
| A_55_P2081 | 11249.2  | Detected   | 10792.7  | Detected | 8661     | Detected | 11875.7  | Detected   | Foxk2     | 1.055692849 | 0.76992142 | 1.1003456  | 0.8024869 |
| A_66_P1050 | 1527.6   | Detected   | 1038.9   | Detected | 717.3    | Detected | 1612.6   | Detected   | Mmp11     | 1.055642838 | 0.46956009 | 1.55221869 | 0.6904418 |
| A_55_P1963 | 590.5    | Detected   | 609.6    | Detected | 611.9    | Detected | 623.3    | Detected   | Gm11595   | 1.055546147 | 1.03624047 | 1.02247375 | 1.003773  |
| A_55_P2026 | 704      | Detected   | 667.6    | Detected | 815.6    | Detected | 743.1    | Detected   | Vprbp     | 1.055539773 | 1.15852273 | 1.11309167 | 1.2216896 |
| A_55_P2021 | 86.5     | Detected   | 87       | Detected | 69.9     | Detected | 91.3     | Detected   | Ccdc114   | 1.055491329 | 0.80809249 | 1.04942529 | 0.8034483 |



|            |          |          |          |            |          |            |          |            |               |             |            |            |           |
|------------|----------|----------|----------|------------|----------|------------|----------|------------|---------------|-------------|------------|------------|-----------|
| A_51_P4983 | 649.5    | Detected | 461.1    | Detected   | 623.6    | Detected   | 685.5    | Detected   | Sbk1          | 1.055427252 | 0.96012317 | 1.48666233 | 1.3524181 |
| A_55_P2127 | 359085.1 | Detected | 356456.2 | Detected   | 372298.8 | Detected   | 378972.2 | Detected   | Zfp628        | 1.055382693 | 1.03679824 | 1.06316625 | 1.0444447 |
| A_51_P2143 | 4493.5   | Detected | 4380.6   | Detected   | 3444.2   | Detected   | 4742.3   | Detected   | Cox11         | 1.055368866 | 0.76648492 | 1.0825686  | 0.7862393 |
| A_51_P4684 | 493.1    | Detected | 408.1    | Detected   | 276.6    | Detected   | 520.4    | Detected   | Arsb          | 1.055364024 | 0.56094099 | 1.27517765 | 0.6777751 |
| A_55_P2452 | 246      | Detected | 251.6    | Detected   | 201.2    | Detected   | 259.6    | Detected   | Mga           | 1.055284553 | 0.81788618 | 1.0317965  | 0.799682  |
| A_66_P1065 | 19233.5  | Detected | 14261    | Detected   | 18223.8  | Detected   | 20296.7  | Detected   | Sae1          | 1.05527855  | 0.94750305 | 1.42323119 | 1.2778767 |
| A_55_P2168 | 2443.9   | Detected | 2037.5   | Detected   | 2862.5   | Detected   | 2578.9   | Detected   | Cdk9          | 1.055239576 | 1.1712836  | 1.26571779 | 1.404908  |
| A_51_P1637 | 8062.9   | Detected | 12881.4  | Detected   | 9706.4   | Detected   | 8508.1   | Detected   | 2810025M15Rik | 1.055215865 | 1.20383485 | 0.66049498 | 0.7535206 |
| A_55_P1965 | 63.4     | Detected | 73.1     | Detected   | 113.9    | Detected   | 66.9     | Detected   | D3Erd751e     | 1.055205047 | 1.79652997 | 0.91518468 | 1.5581395 |
| A_55_P1964 | 123.6    | Detected | 137.3    | Detected   | 133.2    | Detected   | 130.4    | Detected   | Hsd17b7       | 1.055016181 | 1.0776699  | 0.94974508 | 0.9701384 |
| A_51_P4465 | 1136.2   | Detected | 1040.4   | Detected   | 1050.5   | Detected   | 1198.7   | Detected   | Zfp445        | 1.055007921 | 0.92457314 | 1.15215302 | 1.0097078 |
| A_52_P2523 | 2376.3   | Detected | 2477.7   | Detected   | 2486     | Detected   | 2506.9   | Detected   | Pdcd11        | 1.054959391 | 1.0461642  | 1.01178512 | 1.0033499 |
| A_52_P3110 | 184024.5 | Detected | 168414   | Detected   | 183736.4 | Detected   | 194121.6 | Detected   | Gm9757        | 1.054868238 | 0.99843445 | 1.15264527 | 1.0909806 |
| A_66_P1203 | 5414.8   | Detected | 3866.8   | Detected   | 3651.9   | Detected   | 5711.6   | Detected   | Zmynd11       | 1.054812735 | 0.67442934 | 1.477087   | 0.9444243 |
| A_52_P2721 | 93.2     | Detected | 116.8    | Detected   | 116.2    | Detected   | 98.3     | Detected   | Rab42         | 1.05472103  | 1.24678112 | 0.84160959 | 0.994863  |
| A_51_P4998 | 3810.4   | Detected | 4423.5   | Detected   | 1836.5   | Detected   | 4018.8   | Detected   | Ghr           | 1.054692421 | 0.4819704  | 0.90851136 | 0.415169  |
| A_51_P2674 | 36598.6  | Detected | 35309.2  | Detected   | 31863.4  | Detected   | 38600.2  | Detected   | Slc25a11      | 1.054690617 | 0.870618   | 1.09320517 | 0.9024107 |
| A_55_P2259 | 280.1    | Detected | 274.8    | Detected   | 236.6    | Detected   | 295.4    | Detected   | D7Erd143e     | 1.054623349 | 0.84469832 | 1.07496361 | 0.8609898 |
| A_55_P2155 | 403999.8 | Detected | 413563.5 | Detected   | 406021.6 | Detected   | 426063.3 | Detected   | Rps8          | 1.054612651 | 1.00500446 | 1.03022462 | 0.9817636 |
| A_65_P1660 | 1758     | Detected | 1482.4   | Detected   | 2579.1   | Detected   | 1854     | Detected   | Bad           | 1.054607509 | 1.46706485 | 1.25067458 | 1.7398138 |
| A_52_P2932 | 800.5    | Detected | 685.7    | Detected   | 780.8    | Detected   | 844.2    | Detected   | 0610010F05Rik | 1.054590881 | 0.97539038 | 1.23115065 | 1.1386904 |
| A_55_P2047 | 16.5     | Detected | 22.7     | Detected   | 18.7     | Detected   | 17.4     | Not Detect | Notch1        | 1.054545455 | 1.13333333 | 0.76651982 | 0.8237885 |
| A_51_P3335 | 8953.8   | Detected | 7292.8   | Detected   | 5753.5   | Detected   | 9441.5   | Detected   | Sh3rf2        | 1.054468494 | 0.64257634 | 1.29463306 | 0.7889288 |
| A_55_P2000 | 20.2     | Detected | 15.1     | Not Detect | 14.3     | Not Detect | 21.3     | Not Detect | Gm6958        | 1.054455446 | 0.70792079 | 1.41059603 | 0.9470199 |
| A_55_P2216 | 126.8    | Detected | 197.9    | Detected   | 163.5    | Detected   | 133.7    | Detected   | D13Erd608e    | 1.054416404 | 1.28943218 | 0.67559373 | 0.8261748 |
| A_51_P2523 | 8823.7   | Detected | 6930.3   | Detected   | 6948     | Detected   | 9303.8   | Detected   | Stx12         | 1.054410281 | 0.78742478 | 1.34248157 | 1.002554  |
| A_55_P1957 | 21926.9  | Detected | 20650.6  | Detected   | 20607.7  | Detected   | 23118.2  | Detected   | Kat7          | 1.054330526 | 0.93983646 | 1.1194929  | 0.9979226 |
| A_51_P2237 | 10881.3  | Detected | 13259.5  | Detected   | 11004.2  | Detected   | 11472.3  | Detected   | Rtcb          | 1.054313363 | 1.01129461 | 0.86521362 | 0.8299106 |
| A_55_P1976 | 453.3    | Detected | 576.3    | Detected   | 584.8    | Detected   | 477.9    | Detected   | 1700071K01Rik | 1.054268696 | 1.29009486 | 0.8292556  | 1.0147493 |
| A_52_P4829 | 110748.9 | Detected | 120679.2 | Detected   | 121790.7 | Detected   | 116744.1 | Detected   | Serbp1        | 1.054133269 | 1.09970122 | 0.96739206 | 1.0092104 |
| A_52_P5780 | 103.6    | Detected | 80.3     | Detected   | 98.4     | Detected   | 109.2    | Detected   | Zfp708        | 1.054054054 | 0.94980695 | 1.35990037 | 1.2254047 |
| A_55_P2079 | 18.5     | Detected | 16.3     | Detected   | 11.6     | Not Detect | 19.5     | Not Detect | Gm10839       | 1.054054054 | 0.62702703 | 1.19631902 | 0.7116564 |
| A_55_P2138 | 72.2     | Detected | 64.8     | Detected   | 61.7     | Detected   | 76.1     | Detected   | Tmprss3       | 1.05401662  | 0.85457064 | 1.17438272 | 0.9521605 |
| A_55_P2045 | 19282.9  | Detected | 20494.3  | Detected   | 19988.9  | Detected   | 20323.5  | Detected   | Gmfb          | 1.053964912 | 1.03661275 | 0.99166598 | 0.9753395 |
| A_52_P2185 | 14930.4  | Detected | 16948.3  | Detected   | 17978.4  | Detected   | 15735.9  | Detected   | Hnrnpc        | 1.05395033  | 1.20414724 | 0.9284648  | 1.060779  |
| A_51_P3688 | 8173     | Detected | 5479.7   | Detected   | 12274.3  | Detected   | 8613.9   | Detected   | Grb7          | 1.053945919 | 1.50181084 | 1.57196562 | 2.2399584 |
| A_52_P5780 | 941.9    | Detected | 900.2    | Detected   | 666.1    | Detected   | 992.7    | Detected   | Sacs          | 1.053933539 | 0.7071876  | 1.10275494 | 0.7399467 |
| A_55_P2295 | 5778.8   | Detected | 5816.3   | Detected   | 4834.7   | Detected   | 6090.4   | Detected   | 2600002B07Rik | 1.053921229 | 0.83662698 | 1.04712618 | 0.8312329 |
| A_51_P1690 | 2626.8   | Detected | 2374.7   | Detected   | 2266.7   | Detected   | 2768.4   | Detected   | Tdp2          | 1.053905893 | 0.86291305 | 1.16578936 | 0.9545206 |
| A_55_P2010 | 111.4    | Detected | 127      | Detected   | 126.9    | Detected   | 117.4    | Detected   | Mup2          | 1.053859964 | 1.13913824 | 0.92440945 | 0.9992126 |

|            |                  |                   |                   |                  |               |             |            |            |           |
|------------|------------------|-------------------|-------------------|------------------|---------------|-------------|------------|------------|-----------|
| A_55_P2024 | 693.2 Detected   | 746.9 Detected    | 638.2 Detected    | 730.5 Detected   | Med1          | 1.053808425 | 0.92065782 | 0.97804258 | 0.8544651 |
| A_52_P5404 | 85.5 Detected    | 115 Detected      | 57.2 Detected     | 90.1 Detected    | Ccdc55        | 1.05380117  | 0.66900585 | 0.78347826 | 0.4973913 |
| A_66_P1077 | 221.4 Detected   | 142 Detected      | 237.2 Detected    | 233.3 Detected   | 1110020A21Rik | 1.053748871 | 1.07136405 | 1.64295775 | 1.6704225 |
| A_55_P2112 | 320.1 Detected   | 297.4 Detected    | 326.1 Detected    | 337.3 Detected   | Gucy2d        | 1.053733208 | 1.01874414 | 1.13416274 | 1.096503  |
| A_66_P1168 | 2184.2 Detected  | 1800.5 Detected   | 1578.3 Detected   | 2301.5 Detected  | Arid1a        | 1.053703873 | 0.72259866 | 1.27825604 | 0.8765898 |
| A_52_P3051 | 4748.1 Detected  | 3626.9 Detected   | 5578.7 Detected   | 5002.9 Detected  | Ccdc32        | 1.053663571 | 1.17493313 | 1.37938736 | 1.5381455 |
| A_55_P1990 | 23667 Detected   | 21541.9 Detected  | 21939.3 Detected  | 24935.5 Detected | Snrpa         | 1.053597837 | 0.92699962 | 1.15753485 | 1.0184478 |
| A_55_P2041 | 370885 Detected  | 351427.8 Detected | 348619.8 Detected | 390756 Detected  | Ttc38         | 1.053577254 | 0.93996738 | 1.11190976 | 0.9920097 |
| A_55_P2161 | 28 Detected      | 20.3 Detected     | 25.9 Detected     | 29.5 Not Detect  | Oxt           | 1.053571429 | 0.925      | 1.45320197 | 1.2758621 |
| A_52_P5888 | 8562.3 Detected  | 7019.5 Detected   | 5427.9 Detected   | 9020.7 Detected  | Iqgap3        | 1.053537017 | 0.63393014 | 1.28509153 | 0.7732602 |
| A_52_P5652 | 6985.5 Detected  | 5294.8 Detected   | 6601.5 Detected   | 7359.4 Detected  | Sae1          | 1.053525159 | 0.94502899 | 1.38992974 | 1.2467893 |
| A_51_P3387 | 11220.8 Detected | 10866.5 Detected  | 11338.6 Detected  | 11821.3 Detected | Dnajc8        | 1.053516683 | 1.01049836 | 1.08786638 | 1.0434455 |
| A_51_P4513 | 30211.6 Detected | 22694 Detected    | 17721.4 Detected  | 31827.3 Detected | Klf6          | 1.053479458 | 0.58657602 | 1.40245439 | 0.7808848 |
| A_55_P1967 | 17900.7 Detected | 19484.3 Detected  | 18754 Detected    | 18857.3 Detected | Ccnk          | 1.053439251 | 1.04766853 | 0.96782025 | 0.9625185 |
| A_55_P1986 | 13.1 Not Detect  | 18.1 Detected     | 14 Not Detect     | 13.8 Not Detect  | D830036C21Rik | 1.053435115 | 1.06870229 | 0.76243094 | 0.7734807 |
| A_55_P2103 | 116.1 Detected   | 137.3 Detected    | 102.7 Detected    | 122.3 Detected   | Gm6653        | 1.053402239 | 0.88458226 | 0.89075018 | 0.7479971 |
| A_55_P1985 | 207.9 Detected   | 168.9 Detected    | 253.7 Detected    | 219 Detected     | Gm9839        | 1.053391053 | 1.22029822 | 1.29662522 | 1.5020722 |
| A_51_P4420 | 6153.8 Detected  | 5019.4 Detected   | 5500.6 Detected   | 6481.8 Detected  | Ptdss1        | 1.0533004   | 0.8938542  | 1.29134956 | 1.095868  |
| A_52_P5350 | 247.9 Detected   | 230.7 Detected    | 242.3 Detected    | 261.1 Detected   | Rcor1         | 1.053247277 | 0.97741025 | 1.13177287 | 1.0502818 |
| A_52_P2478 | 4407.9 Detected  | 4559.5 Detected   | 3653.8 Detected   | 4642.6 Detected  | Pds5b         | 1.05324531  | 0.8289208  | 1.01822568 | 0.8013598 |
| A_55_P2055 | 47378.2 Detected | 46494.2 Detected  | 44794 Detected    | 49896.8 Detected | Adam15        | 1.05315947  | 0.94545593 | 1.07318332 | 0.963432  |
| A_51_P1207 | 25800.1 Detected | 28021.3 Detected  | 30326.5 Detected  | 27170.7 Detected | Polr2f        | 1.053123825 | 1.17544118 | 0.96964452 | 1.082266  |
| A_52_P3862 | 62.2 Detected    | 77.1 Detected     | 82 Detected       | 65.5 Detected    | Egf           | 1.053054662 | 1.31832797 | 0.84954604 | 1.0635538 |
| A_51_P5059 | 50.9 Detected    | 64.5 Detected     | 37.3 Detected     | 53.6 Detected    | Tcl1b2        | 1.053045187 | 0.73280943 | 0.83100775 | 0.5782946 |
| A_55_P2106 | 2858.5 Detected  | 2288.6 Detected   | 2050.6 Detected   | 3009.9 Detected  | Map3k6        | 1.052964842 | 0.71736925 | 1.31517085 | 0.8960063 |
| A_55_P2086 | 147.3 Detected   | 146.3 Detected    | 102.1 Detected    | 155.1 Detected   | Kif14         | 1.052953157 | 0.69314325 | 1.06015038 | 0.6978811 |
| A_51_P3878 | 8830.5 Detected  | 6399.4 Detected   | 8516.5 Detected   | 9298 Detected    | Fam120a       | 1.05294151  | 0.96444142 | 1.45294871 | 1.3308279 |
| A_55_P2007 | 6624.5 Detected  | 5266.6 Detected   | 4847 Detected     | 6974.9 Detected  | Ctnnbip1      | 1.052894558 | 0.73167786 | 1.32436487 | 0.9203281 |
| A_55_P2060 | 56923.1 Detected | 63010.6 Detected  | 53128.1 Detected  | 59931.9 Detected | ATP8          | 1.052857276 | 0.93333111 | 0.95113997 | 0.8431613 |
| A_55_P2164 | 177.9 Detected   | 138.8 Detected    | 120.1 Detected    | 187.3 Detected   | Chrd          | 1.052838673 | 0.67509837 | 1.34942363 | 0.8652738 |
| A_51_P1973 | 6649.5 Detected  | 6214.3 Detected   | 8200.9 Detected   | 6999.9 Detected  | Atg12         | 1.052695691 | 1.23331078 | 1.1264181  | 1.319682  |
| A_52_P5666 | 2356 Detected    | 2458.5 Detected   | 2124.9 Detected   | 2480.1 Detected  | Hsd17b7       | 1.052674024 | 0.90191002 | 1.00878585 | 0.8643075 |
| A_55_P2038 | 1972.6 Detected  | 2112.6 Detected   | 1959.1 Detected   | 2076.5 Detected  | Lig3          | 1.052671601 | 0.99315624 | 0.98291205 | 0.9273407 |
| A_55_P2172 | 14332.6 Detected | 12319.7 Detected  | 11173.3 Detected  | 15087.3 Detected | Smc2          | 1.052656182 | 0.77957244 | 1.22464833 | 0.9069458 |
| A_55_P1995 | 37917.3 Detected | 41686.8 Detected  | 32855.6 Detected  | 39913.1 Detected | Gm5643        | 1.052635604 | 0.86650685 | 0.95745176 | 0.7881536 |
| A_55_P2078 | 36878.6 Detected | 24938.3 Detected  | 29775 Detected    | 38819.5 Detected | Fam50a        | 1.052629438 | 0.80737881 | 1.55662174 | 1.1939467 |
| A_55_P2084 | 4837.7 Detected  | 4171.4 Detected   | 3670.8 Detected   | 5092.3 Detected  | Zbtb40        | 1.052628315 | 0.75879033 | 1.22076521 | 0.8799923 |
| A_52_P5746 | 11916.1 Detected | 10373.4 Detected  | 10383.5 Detected  | 12543 Detected   | Khdrbs1       | 1.052609495 | 0.87138409 | 1.20915033 | 1.0009736 |
| A_52_P5017 | 1632.9 Detected  | 1567.9 Detected   | 1603 Detected     | 1718.7 Detected  | Ccdc127       | 1.052544553 | 0.98168902 | 1.0961796  | 1.0223866 |
| A_51_P1418 | 26760.3 Detected | 30007.1 Detected  | 28134.3 Detected  | 28166.4 Detected | Fbxw11        | 1.052544254 | 1.05134472 | 0.93865785 | 0.9375881 |

|            |                  |                  |                   |                  |               |             |            |            |           |
|------------|------------------|------------------|-------------------|------------------|---------------|-------------|------------|------------|-----------|
| A_51_P3406 | 754.2 Detected   | 555.5 Detected   | 598.2 Detected    | 793.8 Detected   | Bcl9l         | 1.052505967 | 0.79315831 | 1.4289829  | 1.0768677 |
| A_55_P2054 | 36.2 Detected    | 27.7 Detected    | 34.4 Detected     | 38.1 Not Detect  | Olfrl428      | 1.052486188 | 0.95027624 | 1.37545126 | 1.2418773 |
| A_51_P2606 | 8147.2 Detected  | 10088.5 Detected | 9846.7 Detected   | 8574.7 Detected  | Elp3          | 1.052472015 | 1.20859927 | 0.84994796 | 0.9760321 |
| A_55_P1982 | 280.3 Detected   | 293.7 Detected   | 276.4 Detected    | 295 Detected     | Ramp1         | 1.05244381  | 0.98608634 | 1.00442629 | 0.9410964 |
| A_55_P1979 | 3354.8 Detected  | 2904.8 Detected  | 3550.4 Detected   | 3530.6 Detected  | Spop          | 1.052402528 | 1.05830452 | 1.21543652 | 1.2222528 |
| A_51_P1258 | 152.7 Detected   | 119.9 Detected   | 151.1 Detected    | 160.7 Detected   | Glp2r         | 1.052390308 | 0.98952194 | 1.34028357 | 1.2602168 |
| A_55_P1958 | 11062.8 Detected | 9642.2 Detected  | 9391.5 Detected   | 11641.7 Detected | Rbm33         | 1.052328524 | 0.84892613 | 1.20736969 | 0.9739997 |
| A_55_P2177 | 627.1 Detected   | 601.1 Detected   | 669.2 Detected    | 659.9 Detected   | Lmf1          | 1.052304258 | 1.06713443 | 1.09782066 | 1.1132923 |
| A_55_P1992 | 34.5 Detected    | 26.2 Detected    | 44.5 Detected     | 36.3 Not Detect  | 1700049L16Rik | 1.052173913 | 1.28985507 | 1.38549618 | 1.6984733 |
| A_55_P2008 | 703.9 Detected   | 481.6 Detected   | 566.7 Detected    | 740.6 Detected   | Gm13157       | 1.052138088 | 0.80508595 | 1.5377907  | 1.1767027 |
| A_66_P1317 | 714.4 Detected   | 767.4 Detected   | 622.3 Detected    | 751.6 Detected   | Ythdf2        | 1.052071669 | 0.87108063 | 0.979411   | 0.81092   |
| A_55_P1965 | 2641.1 Detected  | 2143.1 Detected  | 2743.4 Detected   | 2778.6 Detected  | Kcnd1         | 1.052061641 | 1.03873386 | 1.29653306 | 1.2801083 |
| A_55_P1997 | 4605.2 Detected  | 4828.3 Detected  | 4915.3 Detected   | 4844.8 Detected  | Bod1          | 1.052028142 | 1.06733692 | 1.00341735 | 1.0180188 |
| A_55_P2025 | 34521.8 Detected | 33302.1 Detected | 36173.6 Detected  | 36313.5 Detected | Ruvbl2        | 1.051900538 | 1.04784803 | 1.09042673 | 1.0862258 |
| A_55_P2027 | 375.9 Detected   | 344.4 Detected   | 432.6 Detected    | 395.4 Detected   | Ccl25         | 1.051875499 | 1.15083799 | 1.14808362 | 1.2560976 |
| A_52_P4320 | 90.8 Detected    | 90.5 Detected    | 81.9 Detected     | 95.5 Detected    | 4930515G13Rik | 1.051762115 | 0.90198238 | 1.05524862 | 0.9049724 |
| A_55_P2128 | 158.5 Detected   | 142 Detected     | 122.6 Detected    | 166.7 Detected   | Tbc1d12       | 1.051735016 | 0.77350158 | 1.17394366 | 0.8633803 |
| A_52_P4362 | 8707.6 Detected  | 9506.1 Detected  | 8926.3 Detected   | 9158 Detected    | Odc1          | 1.05172493  | 1.02511599 | 0.96338141 | 0.9390076 |
| A_55_P2070 | 42.6 Detected    | 69.6 Detected    | 29.9 Detected     | 44.8 Not Detect  | Gm3173        | 1.051643192 | 0.70187793 | 0.64367816 | 0.4295977 |
| A_52_P4184 | 13467.9 Detected | 11566.2 Detected | 7318.5 Detected   | 14162.8 Detected | Tinagl1       | 1.05159676  | 0.5434032  | 1.22449897 | 0.6327489 |
| A_55_P2185 | 715.9 Detected   | 524.1 Detected   | 795.9 Detected    | 752.8 Detected   | Thap7         | 1.051543512 | 1.11174745 | 1.43636711 | 1.5186033 |
| A_55_P1971 | 1172 Detected    | 1063.2 Detected  | 1290.2 Detected   | 1232.3 Detected  | Kdm2a         | 1.051450512 | 1.10085324 | 1.15904816 | 1.2135064 |
| A_55_P2047 | 66.1 Detected    | 48.1 Detected    | 71.2 Detected     | 69.5 Detected    | Il22ra1       | 1.051437216 | 1.07715582 | 1.44490644 | 1.4802495 |
| A_52_P4142 | 264.7 Detected   | 228.4 Detected   | 270.7 Detected    | 278.3 Detected   | Vprbp         | 1.05137892  | 1.02266717 | 1.21847636 | 1.1852014 |
| A_51_P2445 | 4587.1 Detected  | 3200.9 Detected  | 4769.4 Detected   | 4822.7 Detected  | Oraov1        | 1.051361427 | 1.03974188 | 1.50667    | 1.4900184 |
| A_55_P2122 | 9256.3 Detected  | 4129.2 Detected  | 10425.8 Detected  | 9731 Detected    | Zmym3         | 1.05128399  | 1.12634638 | 2.35663082 | 2.5248959 |
| A_55_P2011 | 46.8 Detected    | 45.1 Detected    | 35.7 Detected     | 49.2 Not Detect  | Gm6598        | 1.051282051 | 0.76282051 | 1.09090909 | 0.7915743 |
| A_55_P1987 | 81813.5 Detected | 80053.6 Detected | 80885.2 Detected  | 86005.6 Detected | Pttg1         | 1.05123971  | 0.98865346 | 1.07435019 | 1.010388  |
| A_55_P1961 | 5431.7 Detected  | 2729.2 Detected  | 4926.8 Detected   | 5710 Detected    | Trp53inp2     | 1.051236261 | 0.90704568 | 2.09218819 | 1.8052176 |
| A_55_P2059 | 74.2 Detected    | 61.3 Detected    | 59.5 Detected     | 78 Detected      | Figl2         | 1.051212938 | 0.80188679 | 1.27243067 | 0.9706362 |
| A_55_P2128 | 84248.5 Detected | 71228 Detected   | 117166.6 Detected | 88555.6 Detected | Mgl2          | 1.051123759 | 1.39072624 | 1.2432695  | 1.6449514 |
| A_52_P1358 | 34183.2 Detected | 34022.5 Detected | 26736.7 Detected  | 35930 Detected   | Myo18a        | 1.051101126 | 0.78215907 | 1.05606584 | 0.7858535 |
| A_51_P2713 | 896.5 Detected   | 945.1 Detected   | 709.3 Detected    | 942.3 Detected   | Wsb1          | 1.051087563 | 0.79118795 | 0.99703735 | 0.7505026 |
| A_52_P4302 | 3464.9 Detected  | 3575.7 Detected  | 3270.6 Detected   | 3641.8 Detected  | Rbm15         | 1.051054864 | 0.94392335 | 1.01848589 | 0.914674  |
| A_55_P2109 | 145.2 Detected   | 116.4 Detected   | 159.3 Detected    | 152.6 Detected   | Dot1l         | 1.050964187 | 1.09710744 | 1.31099656 | 1.3685567 |
| A_55_P1982 | 36408.2 Detected | 40052.7 Detected | 31274.2 Detected  | 38262.9 Detected | Gm8556        | 1.050941821 | 0.85898781 | 0.95531387 | 0.7808263 |
| A_55_P2148 | 1167 Detected    | 896.7 Detected   | 2138.4 Detected   | 1226.4 Detected  | BC039966      | 1.050899743 | 1.83239075 | 1.3676815  | 2.3847441 |
| A_55_P2104 | 17352.4 Detected | 19717.3 Detected | 18901.4 Detected  | 18235.2 Detected | Kctd9         | 1.050874807 | 1.08926719 | 0.92483251 | 0.9586201 |
| A_55_P2008 | 1486.6 Detected  | 1537.1 Detected  | 1351.1 Detected   | 1562.2 Detected  | Otud6b        | 1.050854298 | 0.90885241 | 1.01632945 | 0.8789929 |
| A_52_P1373 | 912.9 Detected   | 831.3 Detected   | 1023.1 Detected   | 959.3 Detected   | Hmgcr         | 1.050827035 | 1.12071421 | 1.1539757  | 1.230723  |

|            |          |          |          |            |          |            |          |            |               |             |            |            |           |
|------------|----------|----------|----------|------------|----------|------------|----------|------------|---------------|-------------|------------|------------|-----------|
| A_66_P1126 | 17070.6  | Detected | 18703.8  | Detected   | 18866.9  | Detected   | 17937.7  | Detected   | Psmc6         | 1.050794934 | 1.1052277  | 0.95904041 | 1.0087202 |
| A_55_P2050 | 20483.6  | Detected | 19413.5  | Detected   | 16280.6  | Detected   | 21523.7  | Detected   | ND5           | 1.050777207 | 0.79481146 | 1.10869756 | 0.8386226 |
| A_55_P1963 | 233714.4 | Detected | 243958.9 | Detected   | 226200.3 | Detected   | 245577.5 | Detected   | Rps6          | 1.050758961 | 0.96784922 | 1.00663472 | 0.9272066 |
| A_51_P3481 | 6660.7   | Detected | 8207.3   | Detected   | 7672.5   | Detected   | 6998.7   | Detected   | Tmem141       | 1.050745417 | 1.15190596 | 0.85274085 | 0.9348385 |
| A_55_P2209 | 232.8    | Detected | 220.9    | Detected   | 247.3    | Detected   | 244.6    | Detected   | 2900001G08Rik | 1.050687285 | 1.06228522 | 1.10728837 | 1.1195111 |
| A_52_P5499 | 277      | Detected | 257.2    | Detected   | 273.5    | Detected   | 291      | Detected   | Ost4          | 1.050541516 | 0.98736462 | 1.13141524 | 1.0633748 |
| A_52_P4633 | 1794.9   | Detected | 1289.6   | Detected   | 1533.4   | Detected   | 1885.6   | Detected   | Serinc3       | 1.050532063 | 0.85430943 | 1.46215881 | 1.1890509 |
| A_52_P5102 | 696.7    | Detected | 633.3    | Detected   | 660.4    | Detected   | 731.9    | Detected   | Traf6         | 1.050523898 | 0.94789723 | 1.1556924  | 1.0427917 |
| A_51_P1370 | 4882.6   | Detected | 4204.1   | Detected   | 5072.3   | Detected   | 5129.2   | Detected   | Zw10          | 1.050505878 | 1.03885225 | 1.2200471  | 1.2065127 |
| A_51_P5092 | 4970.5   | Detected | 4355.7   | Detected   | 4913.9   | Detected   | 5221.2   | Detected   | Rnf34         | 1.050437582 | 0.98861282 | 1.19870514 | 1.1281539 |
| A_52_P3815 | 1154.5   | Detected | 834.2    | Detected   | 1074.1   | Detected   | 1212.7   | Detected   | Lypla1        | 1.050411434 | 0.93035946 | 1.45372812 | 1.2875809 |
| A_51_P4998 | 29737    | Detected | 30636.6  | Detected   | 25940.5  | Detected   | 31233.1  | Detected   | Tubg1         | 1.05031106  | 0.87233077 | 1.01947018 | 0.846716  |
| A_66_P1235 | 17.9     | Detected | 16.3     | Detected   | 14.3     | Not Detect | 18.8     | Not Detect | 4930504D19Rik | 1.05027933  | 0.79888268 | 1.15337423 | 0.8773006 |
| A_52_P5974 | 482.4    | Detected | 680.7    | Detected   | 521.9    | Detected   | 506.6    | Detected   | Skil          | 1.050165837 | 1.08188226 | 0.74423388 | 0.7667107 |
| A_55_P2057 | 4451.5   | Detected | 4768.5   | Detected   | 4304.8   | Detected   | 4674.8   | Detected   | Gm6531        | 1.050162866 | 0.96704482 | 0.98035021 | 0.9027577 |
| A_66_P1114 | 49628.6  | Detected | 52625.3  | Detected   | 46353.1  | Detected   | 52117.8  | Detected   | Ube2j2        | 1.050156563 | 0.93399975 | 0.99035635 | 0.880814  |
| A_55_P2087 | 72905.3  | Detected | 71031.9  | Detected   | 92098.6  | Detected   | 76559    | Detected   | Myeov2        | 1.050115698 | 1.26326344 | 1.07781152 | 1.2965808 |
| A_55_P2095 | 61.9     | Detected | 42.4     | Detected   | 44.5     | Detected   | 65       | Detected   | Tfpi          | 1.050080775 | 0.71890145 | 1.53301887 | 1.0495283 |
| A_51_P3846 | 40704.4  | Detected | 38695.7  | Detected   | 32925.5  | Detected   | 42739.7  | Detected   | Lrrc59        | 1.050001965 | 0.8088929  | 1.10450774 | 0.8508827 |
| A_66_P1150 | 50       | Detected | 80.3     | Detected   | 13.9     | Not Detect | 52.5     | Detected   | Prrt4         | 1.05        | 0.278      | 0.65379826 | 0.1731009 |
| A_55_P1973 | 21414.4  | Detected | 17505.4  | Detected   | 20951.9  | Detected   | 22484.8  | Detected   | Mapk1         | 1.049985057 | 0.97840238 | 1.28444937 | 1.1968821 |
| A_55_P2158 | 43152.3  | Detected | 38783.6  | Detected   | 44893.1  | Detected   | 45308.8  | Detected   | Pbx1          | 1.049974161 | 1.04034084 | 1.16824637 | 1.1575279 |
| A_55_P1952 | 9992.7   | Detected | 9109.4   | Detected   | 8112     | Detected   | 10491.8  | Detected   | Mapk7         | 1.049946461 | 0.81179261 | 1.15175533 | 0.8905087 |
| A_66_P1267 | 1510.3   | Detected | 1498.4   | Detected   | 1274.1   | Detected   | 1585.7   | Detected   | Cwc27         | 1.049923856 | 0.84360723 | 1.05826215 | 0.850307  |
| A_51_P2832 | 208.4    | Detected | 176.5    | Detected   | 292.9    | Detected   | 218.8    | Detected   | Zfp874b       | 1.049904031 | 1.40547025 | 1.23966006 | 1.6594901 |
| A_55_P2067 | 3375.3   | Detected | 3555.5   | Detected   | 6609.8   | Detected   | 3543.5   | Detected   | Cdh6          | 1.049832607 | 1.95828519 | 0.99662495 | 1.8590353 |
| A_55_P2001 | 208850.3 | Detected | 210845.6 | Detected   | 215526   | Detected   | 219249.2 | Detected   | Rpl7a         | 1.049791166 | 1.03196404 | 1.03985665 | 1.0221982 |
| A_55_P1991 | 3329     | Detected | 3760     | Detected   | 3829.7   | Detected   | 3494.6   | Detected   | Fbxo34        | 1.049744668 | 1.15040553 | 0.92941489 | 1.0185372 |
| A_55_P2142 | 4044.7   | Detected | 3081.9   | Detected   | 3757.8   | Detected   | 4245.6   | Detected   | Olf1229       | 1.049669938 | 0.92906767 | 1.37759175 | 1.2193128 |
| A_51_P1916 | 494.5    | Detected | 323.3    | Detected   | 438.3    | Detected   | 519      | Detected   | Cat           | 1.049544995 | 0.88634985 | 1.60532014 | 1.3557068 |
| A_55_P2074 | 644.7    | Detected | 626      | Detected   | 445.2    | Detected   | 676.6    | Detected   | Zswim6        | 1.049480378 | 0.69055375 | 1.08083067 | 0.7111821 |
| A_55_P2131 | 19586.6  | Detected | 22663.5  | Detected   | 16724.4  | Detected   | 20555.7  | Detected   | Hmgb1         | 1.049477704 | 0.85386948 | 0.90699583 | 0.7379443 |
| A_55_P2068 | 179.9    | Detected | 125.4    | Detected   | 122.5    | Detected   | 188.8    | Detected   | Rapgef1       | 1.049471929 | 0.68093385 | 1.50558214 | 0.976874  |
| A_55_P1980 | 9648.8   | Detected | 7252.5   | Detected   | 7023.5   | Detected   | 10126.1  | Detected   | Wdr81         | 1.049467291 | 0.72791435 | 1.39622199 | 0.9684247 |
| A_55_P2036 | 13548.2  | Detected | 14735.7  | Detected   | 17208.3  | Detected   | 14217.8  | Detected   | Cr1l          | 1.04942354  | 1.27015397 | 0.96485406 | 1.1677966 |
| A_55_P2011 | 17620.9  | Detected | 17405.6  | Detected   | 19402.5  | Detected   | 18490.7  | Detected   | Lsg1          | 1.049361837 | 1.10110721 | 1.062342   | 1.1147274 |
| A_55_P2390 | 22.3     | Detected | 7.5      | Not Detect | 13.5     | Not Detect | 23.4     | Not Detect | Six1          | 1.049327354 | 0.60538117 | 3.12       | 1.8       |
| A_51_P3258 | 399.4    | Detected | 109.8    | Detected   | 4723.2   | Detected   | 419.1    | Detected   | Hpx           | 1.049323986 | 11.8257386 | 3.81693989 | 43.016393 |
| A_55_P1992 | 113.6    | Detected | 102.1    | Detected   | 111.5    | Detected   | 119.2    | Detected   | Gm10674       | 1.049295775 | 0.98151408 | 1.16748286 | 1.0920666 |
| A_55_P2120 | 361.2    | Detected | 328.9    | Detected   | 313      | Detected   | 379      | Detected   | Zfp457        | 1.049280177 | 0.86655592 | 1.15232593 | 0.951657  |

|            |                   |                   |                   |                   |               |             |            |            |           |
|------------|-------------------|-------------------|-------------------|-------------------|---------------|-------------|------------|------------|-----------|
| A_51_P3384 | 20.3 Detected     | 25.1 Detected     | 15.4 Not Detect   | 21.3 Not Detect   | Mtnr1b        | 1.049261084 | 0.75862069 | 0.84860558 | 0.6135458 |
| A_66_P1145 | 4889.6 Detected   | 5668.7 Detected   | 4211.6 Detected   | 5129.7 Detected   | Jmjd6         | 1.049104221 | 0.86133835 | 0.90491647 | 0.7429569 |
| A_52_P8898 | 5242.4 Detected   | 4757.3 Detected   | 3664.3 Detected   | 5499.7 Detected   | Dock5         | 1.049080574 | 0.69897375 | 1.15605491 | 0.7702478 |
| A_55_P1998 | 59.1 Detected     | 52.6 Detected     | 105.4 Detected    | 62 Detected       | LOC101056249  | 1.049069374 | 1.78341794 | 1.17870722 | 2.0038023 |
| A_66_P1376 | 1235.5 Detected   | 1341 Detected     | 1356.5 Detected   | 1296.1 Detected   | Smpd2         | 1.049048968 | 1.09793606 | 0.96651752 | 1.0115585 |
| A_55_P2070 | 1365 Detected     | 1624.1 Detected   | 1454.9 Detected   | 1431.9 Detected   | Krtap20-2     | 1.049010989 | 1.06586081 | 0.88165753 | 0.8958192 |
| A_55_P2066 | 1371.5 Detected   | 1176.6 Detected   | 1724.7 Detected   | 1438.7 Detected   | Vps13a        | 1.048997448 | 1.25752825 | 1.2227605  | 1.4658338 |
| A_55_P2181 | 28.6 Detected     | 146.8 Detected    | 23.5 Detected     | 30 Not Detect     | Tcf4          | 1.048951049 | 0.82167832 | 0.20435967 | 0.1600817 |
| A_52_P5843 | 36.8 Detected     | 34.5 Detected     | 26.3 Detected     | 38.6 Not Detect   | Folr1         | 1.048913043 | 0.71467391 | 1.11884058 | 0.7623188 |
| A_55_P2042 | 9443.2 Detected   | 8520.9 Detected   | 8068.9 Detected   | 9904.9 Detected   | Apoo          | 1.048892325 | 0.85446671 | 1.16242416 | 0.946954  |
| A_51_P1371 | 2634.4 Detected   | 2607.2 Detected   | 2928.1 Detected   | 2763.2 Detected   | Smarcal1      | 1.048891588 | 1.11148649 | 1.05983431 | 1.1230822 |
| A_51_P2234 | 31908.8 Detected  | 16242.6 Detected  | 32572.7 Detected  | 33465.3 Detected  | Plin3         | 1.048779647 | 1.02080617 | 2.06034132 | 2.0053871 |
| A_55_P1964 | 3494 Detected     | 3237.3 Detected   | 4405.3 Detected   | 3664.4 Detected   | B230118H07Rik | 1.048769319 | 1.26081855 | 1.13193093 | 1.3607945 |
| A_55_P1974 | 44369.6 Detected  | 36406.8 Detected  | 45633.8 Detected  | 46532.6 Detected  | Rela          | 1.048749594 | 1.02849248 | 1.27812936 | 1.2534417 |
| A_52_P5959 | 3099.7 Detected   | 3271.6 Detected   | 2959.5 Detected   | 3250.8 Detected   | Nelfa         | 1.048746653 | 0.95476982 | 0.99364225 | 0.9046033 |
| A_51_P4156 | 14142.1 Detected  | 12026.7 Detected  | 15392.1 Detected  | 14831.4 Detected  | Gng12         | 1.048740993 | 1.08838857 | 1.23320612 | 1.2798274 |
| A_55_P2129 | 7243.6 Detected   | 6350.8 Detected   | 5242.6 Detected   | 7596.1 Detected   | Srsf4         | 1.048663648 | 0.72375614 | 1.19608553 | 0.8255023 |
| A_51_P3662 | 396.6 Detected    | 304.1 Detected    | 299.7 Detected    | 415.9 Detected    | Zfp865        | 1.048663641 | 0.75567322 | 1.36764222 | 0.9855311 |
| A_51_P4099 | 1235.3 Detected   | 870.2 Detected    | 1103.2 Detected   | 1295.4 Detected   | Arl13b        | 1.048652149 | 0.89306241 | 1.4886233  | 1.2677545 |
| A_51_P3238 | 324205.5 Detected | 314953.7 Detected | 304800.6 Detected | 339967.7 Detected | COX2          | 1.048617929 | 0.9401463  | 1.0794212  | 0.9677632 |
| A_52_P6629 | 43.2 Detected     | 41.4 Detected     | 43.9 Detected     | 45.3 Not Detect   | 1700083H02Rik | 1.048611111 | 1.0162037  | 1.0942029  | 1.0603865 |
| A_51_P1852 | 249.2 Detected    | 199.1 Detected    | 288.3 Detected    | 261.3 Detected    | Gnb5          | 1.048555377 | 1.15690209 | 1.31240583 | 1.4480161 |
| A_55_P2038 | 88.8 Detected     | 99 Detected       | 106.7 Detected    | 93.1 Detected     | Phf11b        | 1.048423423 | 1.20157658 | 0.94040404 | 1.0777778 |
| A_55_P1968 | 758.3 Detected    | 675.9 Detected    | 629.6 Detected    | 795 Detected      | Tdgf1         | 1.048397732 | 0.83027825 | 1.1762095  | 0.9314987 |
| A_51_P1408 | 7624.7 Detected   | 7496.3 Detected   | 7957 Detected     | 7993.6 Detected   | Ankhd1        | 1.048382231 | 1.04358204 | 1.06633939 | 1.061457  |
| A_55_P2168 | 267.5 Detected    | 181.6 Detected    | 299.1 Detected    | 280.4 Detected    | Marf1         | 1.048224299 | 1.11813084 | 1.54405286 | 1.6470264 |
| A_55_P2334 | 8.3 Not Detect    | 3 Not Detect      | 20.1 Detected     | 8.7 Not Detect    | AI327134      | 1.048192771 | 2.42168675 | 2.9        | 6.7       |
| A_55_P2060 | 68.5 Detected     | 46.8 Detected     | 46.3 Detected     | 71.8 Detected     | Mcf2l         | 1.048175182 | 0.67591241 | 1.53418803 | 0.9893162 |
| A_55_P2085 | 8475 Detected     | 8059.1 Detected   | 11984.1 Detected  | 8883 Detected     | Nudt1         | 1.048141593 | 1.4140531  | 1.10223226 | 1.4870271 |
| A_55_P2183 | 49.9 Detected     | 46.3 Detected     | 45.9 Detected     | 52.3 Detected     | Dux           | 1.048096192 | 0.91983968 | 1.12958963 | 0.9913607 |
| A_55_P1974 | 788.1 Detected    | 787.9 Detected    | 804.7 Detected    | 826 Detected      | Dtd2          | 1.048090344 | 1.02106332 | 1.04835639 | 1.0213225 |
| A_52_P3583 | 2561.2 Detected   | 2562.1 Detected   | 2363.1 Detected   | 2684.3 Detected   | Ppp4r2        | 1.048063408 | 0.92265344 | 1.04769525 | 0.9223293 |
| A_55_P1972 | 70.8 Detected     | 49.3 Detected     | 72.2 Detected     | 74.2 Detected     | Gm324         | 1.048022599 | 1.01977401 | 1.50507099 | 1.464503  |
| A_55_P2112 | 3604 Detected     | 3595 Detected     | 3746.8 Detected   | 3777 Detected     | Srp9          | 1.04800222  | 1.03962264 | 1.05062587 | 1.0422253 |
| A_55_P2081 | 85110 Detected    | 63718.8 Detected  | 73870.1 Detected  | 89190.6 Detected  | Sptbn1        | 1.047945012 | 0.86793679 | 1.39975329 | 1.159314  |
| A_55_P2108 | 16209.8 Detected  | 17438.2 Detected  | 17001.4 Detected  | 16986.7 Detected  | Rrp7a         | 1.047927797 | 1.04883466 | 0.97410857 | 0.9749515 |
| A_51_P3468 | 18631.8 Detected  | 14183.3 Detected  | 13578.3 Detected  | 19523.6 Detected  | Rragc         | 1.047864404 | 0.72877017 | 1.37652027 | 0.9573442 |
| A_55_P2106 | 6819.9 Detected   | 6956 Detected     | 4491.2 Detected   | 7146 Detected     | Mbnl3         | 1.04781595  | 0.65854338 | 1.02731455 | 0.6456584 |
| A_55_P2182 | 110629.4 Detected | 114771.1 Detected | 114307.7 Detected | 115910.6 Detected | Kpna2         | 1.047737762 | 1.03324885 | 1.00992846 | 0.9959624 |
| A_51_P4319 | 46345.8 Detected  | 40066.2 Detected  | 44745.2 Detected  | 48557.3 Detected  | Pdcd6         | 1.047717377 | 0.96546397 | 1.21192676 | 1.1167817 |

|            |          |          |          |            |          |            |          |            |               |             |            |            |           |
|------------|----------|----------|----------|------------|----------|------------|----------|------------|---------------|-------------|------------|------------|-----------|
| A_55_P2350 | 109.1    | Detected | 73.5     | Detected   | 112      | Detected   | 114.3    | Detected   | Gm14858       | 1.047662695 | 1.02658112 | 1.55510204 | 1.5238095 |
| A_55_P2068 | 476.3    | Detected | 337.8    | Detected   | 402.3    | Detected   | 499      | Detected   | Pias1         | 1.047659038 | 0.84463573 | 1.47720545 | 1.1909414 |
| A_51_P5120 | 39.9     | Detected | 38.6     | Detected   | 46.7     | Detected   | 41.8     | Not Detect | 1600015110Rik | 1.047619048 | 1.17042607 | 1.08290155 | 1.2098446 |
| A_55_P2300 | 445.3    | Detected | 390.5    | Detected   | 333.5    | Detected   | 466.5    | Detected   | 4833412C15Rik | 1.047608354 | 0.7489333  | 1.19462228 | 0.8540333 |
| A_55_P2125 | 340.5    | Detected | 319.8    | Detected   | 298.3    | Detected   | 356.7    | Detected   | Tnfrsf4       | 1.047577093 | 0.87606461 | 1.11538462 | 0.9327705 |
| A_55_P1990 | 357211   | Detected | 365176.7 | Detected   | 396085.2 | Detected   | 374180.4 | Detected   | Rplp2         | 1.047505256 | 1.108827   | 1.02465574 | 1.0846398 |
| A_55_P1997 | 5648.1   | Detected | 4748.9   | Detected   | 4042.8   | Detected   | 5916.4   | Detected   | Map9          | 1.0475027   | 0.71578053 | 1.24584641 | 0.8513129 |
| A_51_P1618 | 14738.6  | Detected | 17581.2  | Detected   | 16106.6  | Detected   | 15437.3  | Detected   | Med30         | 1.047406131 | 1.0928175  | 0.87805724 | 0.9161263 |
| A_52_P1106 | 35.9     | Detected | 43.1     | Detected   | 51.6     | Detected   | 37.6     | Not Detect | Tomm70a       | 1.04735376  | 1.43732591 | 0.87238979 | 1.1972158 |
| A_55_P1954 | 853.8    | Detected | 616.2    | Detected   | 1018.4   | Detected   | 894.2    | Detected   | Fbxw2         | 1.047317873 | 1.1927852  | 1.45115222 | 1.6527102 |
| A_55_P1960 | 1406.9   | Detected | 1626.5   | Detected   | 1088.1   | Detected   | 1473.3   | Detected   | Slc16a13      | 1.047195963 | 0.77340252 | 0.90581002 | 0.6689825 |
| A_55_P2114 | 140.1    | Detected | 115.9    | Detected   | 134      | Detected   | 146.7    | Detected   | Pvalb         | 1.047109208 | 0.95645967 | 1.26574633 | 1.1561691 |
| A_65_P1327 | 856.6    | Detected | 678.1    | Detected   | 732.6    | Detected   | 896.9    | Detected   | Csnk1g1       | 1.047046463 | 0.85524165 | 1.32266627 | 1.0803716 |
| A_55_P2054 | 5842.5   | Detected | 4869.9   | Detected   | 4148.3   | Detected   | 6117.3   | Detected   | Maml1         | 1.04703466  | 0.71002139 | 1.25614489 | 0.8518245 |
| A_55_P2185 | 178.6    | Detected | 91.3     | Detected   | 101.1    | Detected   | 187      | Detected   | Meis3         | 1.047032475 | 0.56606943 | 2.04819277 | 1.1073384 |
| A_51_P1966 | 8787.1   | Detected | 6169.1   | Detected   | 8514.4   | Detected   | 9199.3   | Detected   | Fam102b       | 1.046909674 | 0.96896587 | 1.49118996 | 1.3801689 |
| A_52_P2392 | 3298.6   | Detected | 3348.1   | Detected   | 3247.6   | Detected   | 3453.3   | Detected   | AI597479      | 1.046898684 | 0.9845389  | 1.03142081 | 0.969983  |
| A_51_P3524 | 486.4    | Detected | 694.5    | Detected   | 611.8    | Detected   | 509.2    | Detected   | Nudcd1        | 1.046875    | 1.2578125  | 0.73318934 | 0.8809215 |
| A_55_P1998 | 384.3    | Detected | 318.1    | Detected   | 240.8    | Detected   | 402.3    | Detected   | Traf6         | 1.046838407 | 0.62659381 | 1.26469664 | 0.7569947 |
| A_55_P2060 | 3470.2   | Detected | 2948.2   | Detected   | 3228.5   | Detected   | 3632.7   | Detected   | Hoxa1         | 1.046827272 | 0.93034984 | 1.23217556 | 1.095075  |
| A_55_P2129 | 29.9     | Detected | 29.3     | Detected   | 18       | Not Detect | 31.3     | Not Detect | Gm5464        | 1.046822742 | 0.60200669 | 1.06825939 | 0.6143345 |
| A_55_P2001 | 854.7    | Detected | 850.9    | Detected   | 866.7    | Detected   | 894.7    | Detected   | Arid2         | 1.046800047 | 1.01404001 | 1.05147491 | 1.0185686 |
| A_55_P1987 | 18597.7  | Detected | 22594.7  | Detected   | 23078    | Detected   | 19467.9  | Detected   | Eny2          | 1.046790732 | 1.24090613 | 0.86161356 | 1.02139   |
| A_55_P1957 | 143587.5 | Detected | 152118.1 | Detected   | 158525.7 | Detected   | 150291   | Detected   | Ptma          | 1.046685819 | 1.10403552 | 0.98798894 | 1.0421225 |
| A_55_P2316 | 7500.6   | Detected | 4260.7   | Detected   | 6664     | Detected   | 7849.5   | Detected   | Neo1          | 1.046516279 | 0.88846226 | 1.84230291 | 1.5640622 |
| A_51_P2538 | 61346.1  | Detected | 46132.8  | Detected   | 43859.4  | Detected   | 64199.1  | Detected   | Mki67         | 1.046506624 | 0.71495009 | 1.39161508 | 0.9507205 |
| A_55_P2016 | 7462.3   | Detected | 7705     | Detected   | 6435.1   | Detected   | 7809.1   | Detected   | Tmem131       | 1.046473607 | 0.86234807 | 1.01351071 | 0.8351849 |
| A_52_P2194 | 938.6    | Detected | 1128.1   | Detected   | 649.1    | Detected   | 982.2    | Detected   | Cdc6          | 1.046452163 | 0.6915619  | 0.87066749 | 0.5753923 |
| A_55_P1984 | 15229.1  | Detected | 14448.5  | Detected   | 10935.2  | Detected   | 15936    | Detected   | Fam220a       | 1.046417713 | 0.71804637 | 1.10295186 | 0.7568398 |
| A_51_P1363 | 342.6    | Detected | 298.5    | Detected   | 280.4    | Detected   | 358.5    | Detected   | Gng11         | 1.046409807 | 0.81844717 | 1.20100503 | 0.9393635 |
| A_55_P2049 | 15.1     | Detected | 12.4     | Not Detect | 13.8     | Not Detect | 15.8     | Not Detect | Gm4755        | 1.046357616 | 0.91390728 | 1.27419355 | 1.1129032 |
| A_55_P2000 | 731.7    | Detected | 580.1    | Detected   | 1086.8   | Detected   | 765.6    | Detected   | Gnb5          | 1.046330463 | 1.48530819 | 1.31977245 | 1.8734701 |
| A_51_P2625 | 3882.9   | Detected | 4025.9   | Detected   | 4276.6   | Detected   | 4062.7   | Detected   | Cxxc1         | 1.046305596 | 1.10139329 | 1.00914081 | 1.0622718 |
| A_51_P2118 | 270.1    | Detected | 134.3    | Detected   | 346.6    | Detected   | 282.6    | Detected   | Selp          | 1.046279156 | 1.28322843 | 2.10424423 | 2.5807893 |
| A_55_P2013 | 149.2    | Detected | 134.2    | Detected   | 137      | Detected   | 156.1    | Detected   | Dpp6          | 1.046246649 | 0.91823056 | 1.16318927 | 1.0208644 |
| A_55_P1958 | 23.8     | Detected | 28.2     | Detected   | 33.5     | Detected   | 24.9     | Not Detect | Harbi1        | 1.046218487 | 1.40756303 | 0.88297872 | 1.1879433 |
| A_55_P2344 | 65.1     | Detected | 63.5     | Detected   | 58       | Detected   | 68.1     | Detected   | C87490        | 1.046082949 | 0.89093702 | 1.07244094 | 0.9133858 |
| A_55_P2066 | 3174.2   | Detected | 3418.4   | Detected   | 2913.6   | Detected   | 3320.3   | Detected   | Hnrnpa1       | 1.046027345 | 0.91790057 | 0.97130236 | 0.8523286 |
| A_65_P1747 | 193.4    | Detected | 133.7    | Detected   | 116.4    | Detected   | 202.3    | Detected   | Gse1          | 1.046018614 | 0.60186143 | 1.51308901 | 0.8706058 |
| A_55_P1985 | 87283.4  | Detected | 94078.8  | Detected   | 91309.6  | Detected   | 91298.5  | Detected   | LOC101055799  | 1.046000729 | 1.0461279  | 0.97044711 | 0.9705651 |

|            |                   |                   |                   |                   |            |             |            |            |           |
|------------|-------------------|-------------------|-------------------|-------------------|------------|-------------|------------|------------|-----------|
| A_55_P2230 | 350 Detected      | 321.7 Detected    | 238.6 Detected    | 366.1 Detected    | D930050J11 | 1.046       | 0.68171429 | 1.13801679 | 0.7416848 |
| A_55_P1977 | 8.7 Not Detect    | 19.1 Detected     | 10.4 Not Detect   | 9.1 Not Detect    | Wnt16      | 1.045977011 | 1.1954023  | 0.47643979 | 0.5445026 |
| A_55_P2054 | 9332.2 Detected   | 11680.1 Detected  | 11975.2 Detected  | 9760.7 Detected   | M6pr       | 1.04591629  | 1.28321296 | 0.83566922 | 1.0252652 |
| A_55_P2047 | 246449.8 Detected | 246801 Detected   | 267394.1 Detected | 257758.1 Detected | Rps9       | 1.045884801 | 1.08498404 | 1.0443965  | 1.0834401 |
| A_55_P1958 | 251344.1 Detected | 267172.9 Detected | 234702.7 Detected | 262875.6 Detected | Eno1       | 1.045879334 | 0.93379037 | 0.98391566 | 0.8784675 |
| A_55_P2072 | 30.6 Detected     | 31.6 Detected     | 23.5 Detected     | 32 Not Detect     | Ncoa6      | 1.045751634 | 0.76797386 | 1.01265823 | 0.7436709 |
| A_51_P1417 | 10485.3 Detected  | 12861.6 Detected  | 19210.2 Detected  | 10965 Detected    | Uhrf2      | 1.045749764 | 1.83210781 | 0.85253779 | 1.4936089 |
| A_51_P3275 | 6617.7 Detected   | 4774.6 Detected   | 8010.2 Detected   | 6920.4 Detected   | Glb1       | 1.045740967 | 1.21042054 | 1.44941985 | 1.6776693 |
| A_66_P1164 | 72.2 Detected     | 65.6 Detected     | 74.7 Detected     | 75.5 Detected     | Mro        | 1.045706371 | 1.03462604 | 1.15091463 | 1.1387195 |
| A_55_P1957 | 39.4 Detected     | 31.2 Detected     | 30.7 Detected     | 41.2 Not Detect   | Gm15104    | 1.045685279 | 0.77918782 | 1.32051282 | 0.9839744 |
| A_55_P1963 | 42593.3 Detected  | 40782.2 Detected  | 58678.4 Detected  | 44537.4 Detected  | Ndfip1     | 1.045643329 | 1.3776439  | 1.09207939 | 1.4388238 |
| A_52_P3763 | 4293.5 Detected   | 5209.6 Detected   | 3505 Detected     | 4489 Detected     | Pdgfc      | 1.045533947 | 0.8163503  | 0.86167844 | 0.6727964 |
| A_55_P2010 | 1421.1 Detected   | 770.6 Detected    | 1256.4 Detected   | 1485.8 Detected   | Rab27b     | 1.045528112 | 0.88410386 | 1.92810797 | 1.6304179 |
| A_66_P1305 | 1017.4 Detected   | 902.5 Detected    | 1258.2 Detected   | 1063.7 Detected   | Traip      | 1.045508158 | 1.23668174 | 1.17861496 | 1.3941274 |
| A_55_P2050 | 323.2 Detected    | 300 Detected      | 251.6 Detected    | 337.9 Detected    | Trip11     | 1.045482673 | 0.77846535 | 1.12633333 | 0.8386667 |
| A_55_P2166 | 224.4 Detected    | 157 Detected      | 149.1 Detected    | 234.6 Detected    | Timm10b    | 1.045454545 | 0.6644385  | 1.49426752 | 0.9496815 |
| A_55_P1960 | 9293.6 Detected   | 6064.8 Detected   | 6391.2 Detected   | 9715.5 Detected   | Zdhc9      | 1.045396832 | 0.68769906 | 1.60194895 | 1.0538188 |
| A_51_P2011 | 13508.2 Detected  | 13176.1 Detected  | 14047.9 Detected  | 14121.3 Detected  | Lbr        | 1.045387246 | 1.03995351 | 1.07173595 | 1.0661653 |
| A_55_P2025 | 2296.1 Detected   | 2055 Detected     | 2391.7 Detected   | 2400.3 Detected   | Csf1r      | 1.045381299 | 1.04163582 | 1.1680292  | 1.1638443 |
| A_55_P2069 | 243497.4 Detected | 275773.1 Detected | 273662.5 Detected | 254540 Detected   | Rps12l2    | 1.045349971 | 1.12388264 | 0.92300518 | 0.9923466 |
| A_55_P2007 | 70.6 Detected     | 37.8 Detected     | 60.8 Detected     | 73.8 Detected     | Catsper2   | 1.045325779 | 0.8611898  | 1.95238095 | 1.6084656 |
| A_55_P1975 | 132.4 Detected    | 282.5 Detected    | 102.4 Detected    | 138.4 Detected    | Dnmt3b     | 1.045317221 | 0.7734139  | 0.4899115  | 0.3624779 |
| A_55_P1970 | 21727.8 Detected  | 15834.2 Detected  | 19396 Detected    | 22710.8 Detected  | Usp7       | 1.04524158  | 0.89268127 | 1.43428781 | 1.2249435 |
| A_52_P3704 | 32185.7 Detected  | 29402.1 Detected  | 34682.3 Detected  | 33641.7 Detected  | Kcmf1      | 1.045237481 | 1.07756861 | 1.14419378 | 1.1795858 |
| A_55_P1955 | 206309.9 Detected | 186444.7 Detected | 175356.7 Detected | 215641.5 Detected | Hccs       | 1.045230985 | 0.84996745 | 1.15659764 | 0.9405293 |
| A_52_P1385 | 1141.8 Detected   | 1134.3 Detected   | 1164.3 Detected   | 1193.4 Detected   | Pum2       | 1.045191802 | 1.01970573 | 1.05210262 | 1.026448  |
| A_51_P5069 | 533.8 Detected    | 428.6 Detected    | 420.3 Detected    | 557.9 Detected    | Cldn9      | 1.045147996 | 0.78737355 | 1.30167989 | 0.9806346 |
| A_55_P2435 | 645 Detected      | 303 Detected      | 547.3 Detected    | 674.1 Detected    | Etl4       | 1.045116279 | 0.84852713 | 2.22475248 | 1.8062706 |
| A_55_P2125 | 5209.6 Detected   | 4571 Detected     | 5611.5 Detected   | 5444.5 Detected   | Hist1h4j   | 1.045089834 | 1.07714604 | 1.19109604 | 1.2276307 |
| A_52_P1643 | 281.9 Detected    | 247.2 Detected    | 215 Detected      | 294.6 Detected    | Fktn       | 1.045051437 | 0.7626818  | 1.19174757 | 0.8697411 |
| A_51_P1137 | 6039.5 Detected   | 5706.6 Detected   | 8480.5 Detected   | 6311.3 Detected   | Prpf19     | 1.045003725 | 1.40417253 | 1.10596502 | 1.4860863 |
| A_55_P2007 | 18557.3 Detected  | 16151.4 Detected  | 16866.7 Detected  | 19391.2 Detected  | Pef1       | 1.044936494 | 0.90889839 | 1.20058942 | 1.0442872 |
| A_55_P2184 | 91.4 Detected     | 72.8 Detected     | 82.1 Detected     | 95.5 Detected     | Tesk2      | 1.044857768 | 0.89824945 | 1.31181319 | 1.1277473 |
| A_55_P2030 | 63851.6 Detected  | 55163.2 Detected  | 68712.4 Detected  | 66715 Detected    | Ppp2r4     | 1.044844608 | 1.07612652 | 1.20941135 | 1.2456203 |
| A_55_P1957 | 10238.8 Detected  | 9044.4 Detected   | 9162.1 Detected   | 10697.5 Detected  | Gps2       | 1.044800172 | 0.89484119 | 1.18277608 | 1.0130136 |
| A_55_P2122 | 194.2 Detected    | 156.3 Detected    | 170.8 Detected    | 202.9 Detected    | Pnma3      | 1.044799176 | 0.87950566 | 1.29814459 | 1.0927703 |
| A_55_P2002 | 247.9 Detected    | 213.8 Detected    | 168.6 Detected    | 259 Detected      | Usp17la    | 1.044776119 | 0.68011295 | 1.21141254 | 0.7885875 |
| A_55_P2122 | 24.6 Detected     | 28.7 Detected     | 31.4 Detected     | 25.7 Not Detect   | Pdcd1lg2   | 1.044715447 | 1.27642276 | 0.89547038 | 1.0940767 |
| A_55_P1959 | 35421.2 Detected  | 33635.9 Detected  | 30614.1 Detected  | 37003.4 Detected  | Pom121     | 1.044668165 | 0.86428749 | 1.10011624 | 0.9101615 |
| A_55_P2095 | 3739.3 Detected   | 3885.9 Detected   | 3867.5 Detected   | 3906.3 Detected   | Dancr      | 1.044660765 | 1.03428449 | 1.00524975 | 0.9952649 |

|            |          |          |          |            |          |          |          |            |               |             |            |            |           |
|------------|----------|----------|----------|------------|----------|----------|----------|------------|---------------|-------------|------------|------------|-----------|
| A_51_P3427 | 9258.4   | Detected | 10236.8  | Detected   | 8328.5   | Detected | 9671.7   | Detected   | Pold2         | 1.044640543 | 0.89956148 | 0.9447972  | 0.8135843 |
| A_55_P2049 | 11449.4  | Detected | 9090.7   | Detected   | 8589.1   | Detected | 11960.4  | Detected   | Pld2          | 1.04463116  | 0.75017905 | 1.31567426 | 0.9448227 |
| A_55_P2007 | 2507.6   | Detected | 2552.9   | Detected   | 2910.3   | Detected | 2619.4   | Detected   | Xndr-trpc2    | 1.044584463 | 1.1605918  | 1.02604881 | 1.1399976 |
| A_55_P2114 | 4378.9   | Detected | 3420.7   | Detected   | 3812.8   | Detected | 4574     | Detected   | Commd8        | 1.044554568 | 0.87072096 | 1.33715321 | 1.1146257 |
| A_51_P1507 | 1246.8   | Detected | 1538.7   | Detected   | 1127.7   | Detected | 1302.3   | Detected   | Ropn11        | 1.044513956 | 0.90447546 | 0.84636381 | 0.7328914 |
| A_55_P1989 | 2916.6   | Detected | 2212.9   | Detected   | 1401.7   | Detected | 3046.2   | Detected   | Mmp11         | 1.044435301 | 0.48059384 | 1.37656469 | 0.6334222 |
| A_55_P2068 | 8581.9   | Detected | 7504.4   | Detected   | 9325.4   | Detected | 8963     | Detected   | Anapc15       | 1.044407416 | 1.08663583 | 1.19436597 | 1.2426576 |
| A_51_P3072 | 11222.9  | Detected | 10300.2  | Detected   | 12258    | Detected | 11721.2  | Detected   | Ppp5c         | 1.044400289 | 1.09223106 | 1.13795849 | 1.190074  |
| A_55_P1959 | 582      | Detected | 447.1    | Detected   | 586.2    | Detected | 607.8    | Detected   | Mcm8          | 1.044329897 | 1.00721649 | 1.35942742 | 1.3111161 |
| A_55_P2082 | 622.9    | Detected | 583.8    | Detected   | 791.3    | Detected | 650.5    | Detected   | Vps13a        | 1.044308878 | 1.27034837 | 1.11425146 | 1.3554299 |
| A_55_P2100 | 2047.8   | Detected | 2200     | Detected   | 2166     | Detected | 2138.5   | Detected   | Arnt          | 1.044291435 | 1.05772048 | 0.97204545 | 0.9845455 |
| A_55_P2010 | 618.8    | Detected | 643.9    | Detected   | 575      | Detected | 646.2    | Detected   | Scn4a         | 1.04427925  | 0.92921784 | 1.00357198 | 0.8929958 |
| A_51_P3384 | 20194.3  | Detected | 14218.9  | Detected   | 16611.5  | Detected | 21087.8  | Detected   | Numa1         | 1.044245158 | 0.8225836  | 1.48308238 | 1.168269  |
| A_66_P1223 | 2186     | Detected | 2147.4   | Detected   | 2103     | Detected | 2282.7   | Detected   | Ppp4r2        | 1.044236048 | 0.96203111 | 1.06300643 | 0.9793238 |
| A_55_P2041 | 268297.1 | Detected | 282856.5 | Detected   | 289908.3 | Detected | 280165.3 | Detected   | Gm6404        | 1.04423529  | 1.08054951 | 0.99048563 | 1.0249307 |
| A_55_P1999 | 3277.2   | Detected | 3058.8   | Detected   | 2907.4   | Detected | 3421.9   | Detected   | Bag5          | 1.044153546 | 0.88715977 | 1.11870668 | 0.9505035 |
| A_52_P6337 | 1727.9   | Detected | 1935.9   | Detected   | 1671.6   | Detected | 1804     | Detected   | Troap         | 1.044041901 | 0.9674171  | 0.93186632 | 0.8634744 |
| A_51_P5211 | 11264    | Detected | 8174.3   | Detected   | 10741.5  | Detected | 11760    | Detected   | Caml          | 1.044034091 | 0.95361328 | 1.4386553  | 1.3140575 |
| A_55_P1985 | 8230.6   | Detected | 9110.3   | Detected   | 7698.3   | Detected | 8593     | Detected   | Mettl16       | 1.044030812 | 0.93532671 | 0.94321812 | 0.8450106 |
| A_55_P2177 | 481.7    | Detected | 460.7    | Detected   | 477.8    | Detected | 502.9    | Detected   | Prrg2         | 1.044010795 | 0.99190367 | 1.09159974 | 1.0371174 |
| A_55_P2283 | 93.2     | Detected | 49.3     | Detected   | 55       | Detected | 97.3     | Detected   | 2810455B08Rik | 1.043991416 | 0.59012876 | 1.97363083 | 1.1156187 |
| A_55_P1989 | 144787.3 | Detected | 129444.8 | Detected   | 155163   | Detected | 151152.6 | Detected   | Rps17         | 1.04396311  | 1.07166167 | 1.16769928 | 1.1986808 |
| A_52_P6600 | 3031.4   | Detected | 3653     | Detected   | 2460.8   | Detected | 3164.4   | Detected   | Cpsf2         | 1.043874118 | 0.81177014 | 0.86624692 | 0.6736381 |
| A_55_P2031 | 298.7    | Detected | 288.9    | Detected   | 244.2    | Detected | 311.8    | Detected   | Efna3         | 1.043856712 | 0.81754268 | 1.07926618 | 0.8452752 |
| A_52_P4129 | 465.4    | Detected | 487.7    | Detected   | 511      | Detected | 485.8    | Detected   | Tmem209       | 1.043833262 | 1.09798023 | 0.99610416 | 1.0477753 |
| A_55_P2066 | 192.1    | Detected | 173.2    | Detected   | 160.4    | Detected | 200.5    | Detected   | Sctr          | 1.043727225 | 0.83498178 | 1.15762125 | 0.926097  |
| A_55_P2066 | 159235.2 | Detected | 133105.7 | Detected   | 165677.3 | Detected | 166161.9 | Detected   | Serpnb6a      | 1.043499804 | 1.04045651 | 1.24834549 | 1.2447048 |
| A_55_P1974 | 42854.1  | Detected | 31029.6  | Detected   | 50885    | Detected | 44718.2  | Detected   | Npdc1         | 1.043498755 | 1.18740097 | 1.44114652 | 1.6398858 |
| A_52_P4850 | 1912.8   | Detected | 1157.6   | Detected   | 1767.2   | Detected | 1996     | Detected   | Abca2         | 1.043496445 | 0.92388122 | 1.72425708 | 1.5266068 |
| A_52_P2280 | 32.2     | Detected | 38.3     | Detected   | 39.1     | Detected | 33.6     | Not Detect | Ipmk          | 1.043478261 | 1.21428571 | 0.8772846  | 1.0208877 |
| A_55_P2045 | 133.5    | Detected | 117.9    | Detected   | 165.9    | Detected | 139.3    | Detected   | Defa-rs12     | 1.043445693 | 1.24269663 | 1.18150975 | 1.4071247 |
| A_55_P2038 | 4583.4   | Detected | 4295.3   | Detected   | 4148.3   | Detected | 4782.3   | Detected   | Zfp687        | 1.043395732 | 0.90507047 | 1.11337974 | 0.9657765 |
| A_52_P9306 | 1482.3   | Detected | 1189.5   | Detected   | 1196.8   | Detected | 1546.6   | Detected   | Klhl42        | 1.043378533 | 0.80739391 | 1.30021017 | 1.006137  |
| A_52_P6846 | 235.3    | Detected | 211.8    | Detected   | 213.8    | Detected | 245.5    | Detected   | Ankmy2        | 1.043348916 | 0.90862728 | 1.15911237 | 1.0094429 |
| A_52_P5064 | 143.1    | Detected | 165.3    | Detected   | 168.9    | Detected | 149.3    | Detected   | Arhgap27      | 1.043326345 | 1.1802935  | 0.90320629 | 1.0217786 |
| A_55_P2046 | 47657.3  | Detected | 53585.9  | Detected   | 36207.6  | Detected | 49721.2  | Detected   | Tax1bp3       | 1.043307111 | 0.75974929 | 0.92787842 | 0.6756927 |
| A_66_P1113 | 1323.8   | Detected | 1156.9   | Detected   | 1047.8   | Detected | 1381.1   | Detected   | Klhl28        | 1.043284484 | 0.79150929 | 1.19379376 | 0.9056963 |
| A_51_P1632 | 2811.4   | Detected | 2979.2   | Detected   | 2694.1   | Detected | 2933     | Detected   | 2810403A07Rik | 1.043252472 | 0.95827702 | 0.98449248 | 0.9043032 |
| A_51_P2242 | 1597.7   | Detected | 1626.6   | Detected   | 1242.7   | Detected | 1666.8   | Detected   | Rlf           | 1.043249671 | 0.7778056  | 1.02471413 | 0.7639862 |
| A_55_P2003 | 25.5     | Detected | 7        | Not Detect | 18.2     | Detected | 26.6     | Not Detect | Gm6436        | 1.043137255 | 0.71372549 | 3.8        | 2.6       |



|            |          |            |          |            |          |            |          |            |               |             |            |            |           |
|------------|----------|------------|----------|------------|----------|------------|----------|------------|---------------|-------------|------------|------------|-----------|
| A_55_P2089 | 178.5    | Detected   | 176.6    | Detected   | 152      | Detected   | 186.2    | Detected   | Tbx22         | 1.043137255 | 0.85154062 | 1.05436014 | 0.8607022 |
| A_52_P2658 | 788.7    | Detected   | 525.3    | Detected   | 773.6    | Detected   | 822.7    | Detected   | Ccdc9         | 1.043108913 | 0.98085457 | 1.56615267 | 1.4726823 |
| A_51_P4774 | 4508.3   | Detected   | 3673.2   | Detected   | 4419.9   | Detected   | 4702.3   | Detected   | Sec23ip       | 1.043031741 | 0.98039172 | 1.28016443 | 1.2032832 |
| A_52_P1077 | 557.9    | Detected   | 429.9    | Detected   | 375.1    | Detected   | 581.9    | Detected   | Heatr6        | 1.043018462 | 0.67234271 | 1.3535706  | 0.8725285 |
| A_55_P2179 | 25.6     | Detected   | 27.1     | Detected   | 37.4     | Detected   | 26.7     | Not Detect | Prss33        | 1.04296875  | 1.4609375  | 0.98523985 | 1.3800738 |
| A_55_P2003 | 971.4    | Detected   | 1094.8   | Detected   | 919.8    | Detected   | 1013.1   | Detected   | Pfn1          | 1.042927733 | 0.94688079 | 0.9253745  | 0.8401535 |
| A_55_P2013 | 739.4    | Detected   | 608.8    | Detected   | 631.2    | Detected   | 771.1    | Detected   | Brat1         | 1.042872599 | 0.85366513 | 1.26659001 | 1.0367937 |
| A_55_P2117 | 126      | Detected   | 139.3    | Detected   | 120.4    | Detected   | 131.4    | Detected   | Zbtb49        | 1.042857143 | 0.95555556 | 0.94328787 | 0.8643216 |
| A_52_P1572 | 1774.2   | Detected   | 1196.5   | Detected   | 1763.7   | Detected   | 1850.1   | Detected   | Abi1          | 1.042779844 | 0.99408184 | 1.54625992 | 1.4740493 |
| A_55_P2067 | 418.9    | Detected   | 376.6    | Detected   | 468.6    | Detected   | 436.8    | Detected   | Lce3d         | 1.042730962 | 1.11864407 | 1.1598513  | 1.244291  |
| A_51_P3482 | 880.3    | Detected   | 841.6    | Detected   | 853.9    | Detected   | 917.9    | Detected   | Il17ra        | 1.042712712 | 0.97001022 | 1.09066065 | 1.014615  |
| A_66_P1065 | 16.4     | Detected   | 11.7     | Not Detect | 19.7     | Detected   | 17.1     | Not Detect | Olf156        | 1.042682927 | 1.20121951 | 1.46153846 | 1.6837607 |
| A_55_P2148 | 21.1     | Detected   | 11.8     | Not Detect | 15.8     | Detected   | 22       | Not Detect | Gpr61         | 1.042654028 | 0.74881517 | 1.86440678 | 1.3389831 |
| A_55_P2147 | 117.4    | Detected   | 112      | Detected   | 121.5    | Detected   | 122.4    | Detected   | C2cd4a        | 1.042589438 | 1.03492334 | 1.09285714 | 1.0848214 |
| A_66_P1327 | 1665.5   | Detected   | 1869     | Detected   | 1267.9   | Detected   | 1736.4   | Detected   | Cep68         | 1.042569799 | 0.76127289 | 0.92905297 | 0.6783842 |
| A_51_P2159 | 192.7    | Detected   | 156.7    | Detected   | 145.2    | Detected   | 200.9    | Detected   | Chrd          | 1.042553191 | 0.75350285 | 1.28206765 | 0.9266114 |
| A_52_P6829 | 9848.3   | Detected   | 8764.2   | Detected   | 10912.9  | Detected   | 10267.2  | Detected   | Timm50        | 1.04253526  | 1.10809988 | 1.17149312 | 1.2451678 |
| A_55_P2107 | 5675.9   | Detected   | 5258.9   | Detected   | 6924.9   | Detected   | 5917.2   | Detected   | Pbx3          | 1.042513082 | 1.22005321 | 1.12517827 | 1.3167963 |
| A_51_P3420 | 26118.7  | Detected   | 28260.1  | Detected   | 30907.1  | Detected   | 27227    | Detected   | Cnpy2         | 1.042433199 | 1.18333225 | 0.96344316 | 1.0936656 |
| A_55_P1996 | 303501.4 | Detected   | 266840.1 | Detected   | 335558.1 | Detected   | 316363.8 | Detected   | Rpl29         | 1.042380035 | 1.10562291 | 1.18559317 | 1.257525  |
| A_55_P2006 | 1467.3   | Detected   | 1431.1   | Detected   | 1824.3   | Detected   | 1529.4   | Detected   | Ntrk2         | 1.042322633 | 1.24330403 | 1.06868842 | 1.2747537 |
| A_55_P1954 | 288.3    | Detected   | 164      | Detected   | 294.2    | Detected   | 300.5    | Detected   | Vps13c        | 1.042317031 | 1.02046479 | 1.83231707 | 1.7939024 |
| A_55_P2107 | 2129.8   | Detected   | 2152.5   | Detected   | 1570.5   | Detected   | 2219.7   | Detected   | Hectd1        | 1.042210536 | 0.73739318 | 1.03121951 | 0.7296167 |
| A_51_P3773 | 2102.2   | Detected   | 2127.6   | Detected   | 2132.7   | Detected   | 2190.9   | Detected   | Ndst2         | 1.042193892 | 1.01450861 | 1.02975183 | 1.0023971 |
| A_55_P1983 | 9.5      | Not Detect | 20.5     | Detected   | 3.6      | Not Detect | 9.9      | Not Detect | Casp12        | 1.042105263 | 0.37894737 | 0.48292683 | 0.1756098 |
| A_52_P3262 | 1409.4   | Detected   | 1140.7   | Detected   | 1103.2   | Detected   | 1468.7   | Detected   | Cttn          | 1.042074642 | 0.78274443 | 1.28754274 | 0.9671254 |
| A_55_P2042 | 55845.5  | Detected   | 61829.7  | Detected   | 54729.1  | Detected   | 58193.5  | Detected   | Slc25a3       | 1.042044569 | 0.98000913 | 0.94119008 | 0.8851588 |
| A_55_P1975 | 164.2    | Detected   | 127.8    | Detected   | 184.6    | Detected   | 171.1    | Detected   | Cpped1        | 1.042021924 | 1.12423873 | 1.33881064 | 1.4444444 |
| A_55_P2139 | 3092.9   | Detected   | 1918.6   | Detected   | 2722.8   | Detected   | 3222.8   | Detected   | Fbxo18        | 1.041999418 | 0.88033884 | 1.6797665  | 1.4191598 |
| A_55_P2008 | 259337.7 | Detected   | 270776.2 | Detected   | 236147.5 | Detected   | 270218.7 | Detected   | Gm5506        | 1.041956877 | 0.91057914 | 0.9979411  | 0.8721132 |
| A_51_P4947 | 50.1     | Detected   | 7.4      | Not Detect | 18.7     | Detected   | 52.2     | Detected   | Mael          | 1.041916168 | 0.37325349 | 7.05405405 | 2.527027  |
| A_51_P4742 | 88.4     | Detected   | 65.1     | Detected   | 79.1     | Detected   | 92.1     | Detected   | Spatc11       | 1.041855204 | 0.89479638 | 1.41474654 | 1.2150538 |
| A_55_P2091 | 14016    | Detected   | 11940.1  | Detected   | 14198.1  | Detected   | 14602.6  | Detected   | Hist1h4k      | 1.041852169 | 1.01299229 | 1.22298808 | 1.1891106 |
| A_55_P2038 | 47.8     | Detected   | 48.4     | Detected   | 20       | Detected   | 49.8     | Detected   | Slc9a5        | 1.041841004 | 0.41841004 | 1.02892562 | 0.4132231 |
| A_52_P5752 | 45930.8  | Detected   | 57289.2  | Detected   | 39394.3  | Detected   | 47851.9  | Detected   | Sin3b         | 1.041825964 | 0.85768809 | 0.83526913 | 0.6876392 |
| A_55_P1973 | 21909.2  | Detected   | 15060.7  | Detected   | 28841.3  | Detected   | 22824.7  | Detected   | 5730559C18Rik | 1.041786099 | 1.31640133 | 1.51551389 | 1.915004  |
| A_52_P5785 | 792.3    | Detected   | 768.6    | Detected   | 566.3    | Detected   | 825.4    | Detected   | Slc41a1       | 1.041777105 | 0.71475451 | 1.0739006  | 0.7367942 |
| A_55_P2129 | 14135.4  | Detected   | 14049    | Detected   | 16622.5  | Detected   | 14725.3  | Detected   | Mre11a        | 1.041732105 | 1.17594833 | 1.04813866 | 1.1831803 |
| A_55_P2054 | 22704.8  | Detected   | 18717.1  | Detected   | 23546.1  | Detected   | 23652.1  | Detected   | Ube2v2        | 1.041722455 | 1.03705384 | 1.26366264 | 1.2579994 |
| A_55_P2118 | 318.9    | Detected   | 377.6    | Detected   | 245.5    | Detected   | 332.2    | Detected   | 1700054O19Rik | 1.041705864 | 0.7698338  | 0.87976695 | 0.6501589 |

|            |                  |                  |                  |                  |               |             |            |            |           |
|------------|------------------|------------------|------------------|------------------|---------------|-------------|------------|------------|-----------|
| A_55_P2030 | 19.2 Detected    | 14.1 Not Detect  | 8.9 Not Detect   | 20 Not Detect    | Rsph4a        | 1.04166667  | 0.46354167 | 1.41843972 | 0.6312057 |
| A_51_P4678 | 362.5 Detected   | 358.9 Detected   | 168.9 Detected   | 377.6 Detected   | Ap3m2         | 1.041655172 | 0.46593103 | 1.05210365 | 0.4706046 |
| A_55_P2149 | 59295.1 Detected | 54084 Detected   | 71526.5 Detected | 61757 Detected   | Atp5k         | 1.041519451 | 1.20628011 | 1.1418719  | 1.3225076 |
| A_52_P5921 | 2220.6 Detected  | 2408.5 Detected  | 1956.6 Detected  | 2312.6 Detected  | Brf1          | 1.041430244 | 0.88111321 | 0.96018269 | 0.8123728 |
| A_51_P2753 | 8962.3 Detected  | 8640.8 Detected  | 10143.3 Detected | 9333.6 Detected  | Pten          | 1.041429097 | 1.13177421 | 1.08017776 | 1.1738844 |
| A_51_P5017 | 33.8 Detected    | 33.4 Detected    | 37.7 Detected    | 35.2 Not Detect  | Slc35f3       | 1.041420118 | 1.11538462 | 1.05389222 | 1.1287425 |
| A_51_P2234 | 60153.6 Detected | 52656.3 Detected | 69540.3 Detected | 62644.8 Detected | Cd81          | 1.04141398  | 1.15604552 | 1.1896924  | 1.3206454 |
| A_55_P2171 | 56535.8 Detected | 58368.6 Detected | 66638.7 Detected | 58876.2 Detected | Hnrnpc        | 1.041396779 | 1.17869916 | 1.00869646 | 1.1416875 |
| A_55_P2103 | 14.5 Detected    | 20 Detected      | 29.9 Detected    | 15.1 Not Detect  | Mid2          | 1.04137931  | 2.06206897 | 0.755      | 1.495     |
| A_55_P2060 | 2300.3 Detected  | 2033 Detected    | 2443.2 Detected  | 2395.4 Detected  | Zfp352        | 1.041342434 | 1.06212233 | 1.17825873 | 1.2017708 |
| A_51_P5156 | 2090 Detected    | 1711 Detected    | 2061.8 Detected  | 2176.4 Detected  | Qpctl         | 1.041339713 | 0.98650718 | 1.27200468 | 1.2050263 |
| A_52_P4401 | 184 Detected     | 156.4 Detected   | 130.7 Detected   | 191.6 Detected   | Dcaf10        | 1.041304348 | 0.71032609 | 1.22506394 | 0.8356777 |
| A_55_P1974 | 47158.9 Detected | 39563.2 Detected | 47606.6 Detected | 49103.8 Detected | Hp1bp3        | 1.04124142  | 1.00949344 | 1.24114834 | 1.2033051 |
| A_55_P2043 | 167.4 Detected   | 259.1 Detected   | 139.9 Detected   | 174.3 Detected   | Atxn7l2       | 1.041218638 | 0.83572282 | 0.67271324 | 0.539946  |
| A_55_P2199 | 63.1 Detected    | 70.6 Detected    | 84.9 Detected    | 65.7 Detected    | Il22          | 1.041204437 | 1.34548336 | 0.9305949  | 1.2025496 |
| A_51_P4293 | 114.1 Detected   | 142.4 Detected   | 50.2 Detected    | 118.8 Detected   | Prss16        | 1.041191937 | 0.43996494 | 0.83426966 | 0.3525281 |
| A_55_P2184 | 34 Detected      | 30.5 Detected    | 28.2 Detected    | 35.4 Not Detect  | Sppl2c        | 1.041176471 | 0.82941176 | 1.16065574 | 0.9245902 |
| A_55_P2145 | 787.1 Detected   | 412.3 Detected   | 507.8 Detected   | 819.5 Detected   | Eef2k         | 1.041163766 | 0.64515309 | 1.98763037 | 1.2316275 |
| A_55_P2146 | 428.4 Detected   | 575.7 Detected   | 414.8 Detected   | 446 Detected     | Nop9          | 1.0410831   | 0.96825397 | 0.77470905 | 0.7205142 |
| A_55_P2127 | 8073.8 Detected  | 8366.1 Detected  | 8445.7 Detected  | 8405.2 Detected  | 4933434E20Rik | 1.041046347 | 1.04606257 | 1.00467362 | 1.0095146 |
| A_55_P1958 | 8700.3 Detected  | 9234 Detected    | 11058.6 Detected | 9057.3 Detected  | Arf2          | 1.041033068 | 1.27105962 | 0.9808642  | 1.1975958 |
| A_55_P2098 | 2886.7 Detected  | 3375.3 Detected  | 2814.8 Detected  | 3005 Detected    | Mcrs1         | 1.040981051 | 0.97509267 | 0.89029123 | 0.8339407 |
| A_55_P1988 | 29.3 Detected    | 25 Detected      | 8.5 Not Detect   | 30.5 Not Detect  | Gm5953        | 1.040955631 | 0.29010239 | 1.22       | 0.34      |
| A_55_P1968 | 1010.1 Detected  | 1050.2 Detected  | 825.6 Detected   | 1051.4 Detected  | Gpatch2l      | 1.040887041 | 0.81734482 | 1.00114264 | 0.786136  |
| A_55_P1991 | 134.7 Detected   | 105.1 Detected   | 121 Detected     | 140.2 Detected   | Mtcp1         | 1.040831477 | 0.8982925  | 1.33396765 | 1.1512845 |
| A_55_P1968 | 9.8 Not Detect   | 12 Not Detect    | 50.8 Detected    | 10.2 Not Detect  | Rdh7          | 1.040816327 | 5.18367347 | 0.85       | 4.2333333 |
| A_55_P2200 | 17.2 Detected    | 31.9 Detected    | 33.6 Detected    | 17.9 Not Detect  | Zfp389        | 1.040697674 | 1.95348837 | 0.56112853 | 1.0532915 |
| A_52_P2907 | 1487.3 Detected  | 928.3 Detected   | 999.5 Detected   | 1547.8 Detected  | Arfgef2       | 1.040677738 | 0.67202313 | 1.66734892 | 1.0766993 |
| A_51_P1518 | 2610.5 Detected  | 2168.5 Detected  | 2150.9 Detected  | 2716.4 Detected  | Urb1          | 1.040566941 | 0.82394177 | 1.25266313 | 0.9918838 |
| A_55_P2003 | 66.6 Detected    | 40.5 Detected    | 64.8 Detected    | 69.3 Detected    | Unkl          | 1.040540541 | 0.97297297 | 1.71111111 | 1.6       |
| A_55_P2085 | 639.4 Detected   | 533.1 Detected   | 457.3 Detected   | 665.3 Detected   | Lrdd          | 1.040506725 | 0.71520175 | 1.24798349 | 0.8578128 |
| A_55_P2020 | 1654.1 Detected  | 986.4 Detected   | 865.8 Detected   | 1721.1 Detected  | Trim3         | 1.040505411 | 0.52342664 | 1.74482968 | 0.8777372 |
| A_55_P1984 | 11888.2 Detected | 9463.4 Detected  | 13380.5 Detected | 12368.8 Detected | Bloc1s2       | 1.040426642 | 1.12552783 | 1.30701439 | 1.413921  |
| A_51_P4997 | 608.6 Detected   | 831.1 Detected   | 737.6 Detected   | 633.2 Detected   | Denr          | 1.040420638 | 1.21196188 | 0.76188184 | 0.8874985 |
| A_51_P3292 | 70477.6 Detected | 81862.4 Detected | 94324.2 Detected | 73324.9 Detected | Chchd1        | 1.04040007  | 1.33835715 | 0.89570914 | 1.1522286 |
| A_51_P1568 | 3184.1 Detected  | 2472.8 Detected  | 3446.9 Detected  | 3312.5 Detected  | Mob2          | 1.040325367 | 1.0825351  | 1.33957457 | 1.3939259 |
| A_66_P1145 | 24.8 Detected    | 21.1 Detected    | 30 Detected      | 25.8 Not Detect  | Olfcr616      | 1.040322581 | 1.20967742 | 1.22274882 | 1.4218009 |
| A_55_P2059 | 20228.4 Detected | 21503.3 Detected | 16415.9 Detected | 21041.9 Detected | Rcc1          | 1.040215736 | 0.81152736 | 0.97854283 | 0.7634131 |
| A_55_P1986 | 810.7 Detected   | 723.1 Detected   | 789.2 Detected   | 843.3 Detected   | Gm19668       | 1.040212162 | 0.97347971 | 1.16622874 | 1.091412  |
| A_55_P2100 | 39980.3 Detected | 34574.7 Detected | 40124.8 Detected | 41587.2 Detected | Pygo2         | 1.040192295 | 1.00361428 | 1.20282172 | 1.1605249 |

|            |          |            |          |          |          |            |          |            |               |             |            |            |           |
|------------|----------|------------|----------|----------|----------|------------|----------|------------|---------------|-------------|------------|------------|-----------|
| A_55_P1997 | 122.1    | Detected   | 118.5    | Detected | 106.9    | Detected   | 127      | Detected   | Elmsan1       | 1.04013104  | 0.87551188 | 1.07172996 | 0.9021097 |
| A_66_P1178 | 2891.5   | Detected   | 2350.5   | Detected | 2148.6   | Detected   | 3007.4   | Detected   | Dhx29         | 1.040083002 | 0.74307453 | 1.27947245 | 0.9141034 |
| A_55_P2120 | 7495.1   | Detected   | 7828.2   | Detected | 7512.7   | Detected   | 7795.1   | Detected   | Dld           | 1.04002615  | 1.0023482  | 0.9957717  | 0.959697  |
| A_51_P3061 | 10       | Not Detect | 119.1    | Detected | 3.9      | Not Detect | 10.4     | Not Detect | Sgk3          | 1.04        | 0.39       | 0.08732158 | 0.0327456 |
| A_51_P4139 | 2323.2   | Detected   | 2303.1   | Detected | 2240.2   | Detected   | 2415.9   | Detected   | Pgrmc2        | 1.03990186  | 0.96427342 | 1.04897747 | 0.972689  |
| A_52_P2614 | 305.8    | Detected   | 321.2    | Detected | 214.3    | Detected   | 318      | Detected   | Gabpb1        | 1.039895356 | 0.70078483 | 0.99003736 | 0.6671856 |
| A_51_P2566 | 2649.7   | Detected   | 1998.6   | Detected | 2529     | Detected   | 2755.3   | Detected   | Kpna1         | 1.039853568 | 0.95444767 | 1.37861503 | 1.2653858 |
| A_55_P2007 | 121857.3 | Detected   | 128567   | Detected | 159170.4 | Detected   | 126706.9 | Detected   | Snrpg         | 1.03979737  | 1.30620324 | 0.98553206 | 1.2380346 |
| A_55_P2031 | 13690.1  | Detected   | 11658    | Detected | 11675.5  | Detected   | 14234.9  | Detected   | Ggnbp2        | 1.03979518  | 0.85284257 | 1.22104134 | 1.0015011 |
| A_55_P1956 | 43941.6  | Detected   | 49888.4  | Detected | 51369.6  | Detected   | 45685.9  | Detected   | Gm10094       | 1.039695869 | 1.16904255 | 0.91576198 | 1.0296903 |
| A_55_P2315 | 7860.5   | Detected   | 6586.6   | Detected | 6405.3   | Detected   | 8172.1   | Detected   | Gripap1       | 1.039641244 | 0.81487183 | 1.240716   | 0.9724744 |
| A_55_P1957 | 2621.5   | Detected   | 1699.8   | Detected | 2976.6   | Detected   | 2725.3   | Detected   | Pdcl          | 1.039595651 | 1.1354568  | 1.60330627 | 1.7511472 |
| A_55_P2019 | 1419.7   | Detected   | 1099     | Detected | 1100.2   | Detected   | 1475.9   | Detected   | Flii          | 1.039585828 | 0.77495245 | 1.34294813 | 1.0010919 |
| A_55_P2047 | 86265.8  | Detected   | 73354.3  | Detected | 70652.7  | Detected   | 89680.6  | Detected   | Arhgdia       | 1.039584633 | 0.81901171 | 1.22256773 | 0.9631705 |
| A_51_P4258 | 1058.7   | Detected   | 1170.8   | Detected | 1447     | Detected   | 1100.6   | Detected   | Fam132a       | 1.03957684  | 1.36677057 | 0.940041   | 1.2359071 |
| A_55_P2166 | 187      | Detected   | 176.1    | Detected | 211.6    | Detected   | 194.4    | Detected   | Traf3ip1      | 1.039572193 | 1.1315508  | 1.10391823 | 1.20159   |
| A_52_P3236 | 1956.7   | Detected   | 3288.7   | Detected | 314.1    | Detected   | 2034.1   | Detected   | Hmgn3         | 1.039556396 | 0.16052537 | 0.61851187 | 0.0955089 |
| A_55_P1973 | 48349.2  | Detected   | 32196.1  | Detected | 54733.6  | Detected   | 50261.1  | Detected   | Bag1          | 1.039543571 | 1.13204769 | 1.5610928  | 1.7000071 |
| A_55_P1999 | 42462.5  | Detected   | 41376.3  | Detected | 43014.9  | Detected   | 44140.8  | Detected   | Cox7c         | 1.039524286 | 1.01300913 | 1.06681361 | 1.0396024 |
| A_52_P1136 | 2556.3   | Detected   | 1611.1   | Detected | 2062.8   | Detected   | 2657.3   | Detected   | Chml          | 1.03951023  | 0.80694754 | 1.64937    | 1.2803675 |
| A_51_P3379 | 4197.6   | Detected   | 2374.2   | Detected | 3538.6   | Detected   | 4363.4   | Detected   | Aldh4a1       | 1.039498761 | 0.84300553 | 1.83784011 | 1.4904389 |
| A_55_P2121 | 85392.1  | Detected   | 76088.1  | Detected | 100573.7 | Detected   | 88760.6  | Detected   | LOC101055744  | 1.039447443 | 1.17778694 | 1.16655035 | 1.3218059 |
| A_55_P2078 | 955.8    | Detected   | 1081.9   | Detected | 1162.5   | Detected   | 993.5    | Detected   | Gin1          | 1.039443398 | 1.21625863 | 0.91829189 | 1.0744986 |
| A_55_P2137 | 2348     | Detected   | 1880.4   | Detected | 2127     | Detected   | 2440.6   | Detected   | Rnf220        | 1.039437819 | 0.90587734 | 1.29791534 | 1.1311423 |
| A_51_P3366 | 19089.4  | Detected   | 13406.7  | Detected | 19608.9  | Detected   | 19841.9  | Detected   | Dexi          | 1.039419783 | 1.02721406 | 1.47999881 | 1.4626194 |
| A_55_P2249 | 414      | Detected   | 333.6    | Detected | 312.2    | Detected   | 430.3    | Detected   | A430102J17Rik | 1.039371981 | 0.75410628 | 1.28986811 | 0.9358513 |
| A_51_P4419 | 2435.1   | Detected   | 3137.7   | Detected | 3243.1   | Detected   | 2530.9   | Detected   | Tial1         | 1.0393413   | 1.33181389 | 0.80660994 | 1.0335915 |
| A_55_P1983 | 73565.8  | Detected   | 73385.2  | Detected | 77845.1  | Detected   | 76450.4  | Detected   | Tmed10        | 1.039211155 | 1.05816969 | 1.04176864 | 1.0607738 |
| A_55_P2172 | 341.8    | Detected   | 356.9    | Detected | 368.2    | Detected   | 355.2    | Detected   | Zfp384        | 1.039204213 | 1.07723815 | 0.99523676 | 1.0316615 |
| A_51_P3442 | 644      | Detected   | 340.5    | Detected | 700.1    | Detected   | 669.2    | Detected   | Apbb1         | 1.039130435 | 1.0871118  | 1.96534508 | 2.056094  |
| A_55_P2027 | 403595.6 | Detected   | 407155.3 | Detected | 452728.4 | Detected   | 419372.8 | Detected   | Fau           | 1.039091606 | 1.1217377  | 1.03000698 | 1.1119305 |
| A_51_P4779 | 12471    | Detected   | 9168     | Detected | 8736     | Detected   | 12957.8  | Detected   | Kdm5c         | 1.03903456  | 0.70050517 | 1.4133726  | 0.9528796 |
| A_52_P5212 | 6649.2   | Detected   | 5550.5   | Detected | 6009.4   | Detected   | 6906.5   | Detected   | Leo1          | 1.038696385 | 0.9037779  | 1.24430232 | 1.0826772 |
| A_55_P2044 | 228041.2 | Detected   | 222380.2 | Detected | 258564.3 | Detected   | 236859.8 | Detected   | Rpl28         | 1.038671082 | 1.13384906 | 1.06511191 | 1.1627128 |
| A_55_P1999 | 35688.2  | Detected   | 34919.2  | Detected | 39456.6  | Detected   | 37066.4  | Detected   | Josd1         | 1.038617806 | 1.10559232 | 1.06149053 | 1.12994   |
| A_66_P1274 | 21536    | Detected   | 19438.3  | Detected | 21905.2  | Detected   | 22365.8  | Detected   | Tial1         | 1.038530832 | 1.01714339 | 1.15060473 | 1.1269092 |
| A_51_P2361 | 12504.8  | Detected   | 14778    | Detected | 14055.9  | Detected   | 12985.1  | Detected   | Polr1a        | 1.038409251 | 1.12404037 | 0.87867776 | 0.9511368 |
| A_55_P2038 | 731.7    | Detected   | 548      | Detected | 751.2    | Detected   | 759.8    | Detected   | Tpmt          | 1.038403717 | 1.02665027 | 1.38649635 | 1.3708029 |
| A_55_P2183 | 1390.7   | Detected   | 1840.5   | Detected | 1761.2   | Detected   | 1444.1   | Detected   | 9130401M01Rik | 1.038397929 | 1.2664126  | 0.78462374 | 0.9569139 |
| A_51_P2968 | 1172.1   | Detected   | 985.2    | Detected | 997.6    | Detected   | 1217.1   | Detected   | Msi1          | 1.038392629 | 0.85112192 | 1.23538368 | 1.0125863 |

|            |                   |                   |                   |                   |               |             |            |            |           |
|------------|-------------------|-------------------|-------------------|-------------------|---------------|-------------|------------|------------|-----------|
| A_55_P2139 | 583.5 Detected    | 598.5 Detected    | 524.2 Detected    | 605.9 Detected    | Ldoc11        | 1.038389032 | 0.89837189 | 1.01236424 | 0.8758563 |
| A_55_P1987 | 269673.7 Detected | 268529.6 Detected | 264896.6 Detected | 280024.2 Detected | Gm15501       | 1.03838157  | 0.98228563 | 1.04280571 | 0.9864708 |
| A_55_P2387 | 39.1 Detected     | 36.2 Detected     | 15.7 Not Detect   | 40.6 Not Detect   | 4930471M09Rik | 1.038363171 | 0.40153453 | 1.12154696 | 0.4337017 |
| A_55_P2149 | 235 Detected      | 197.8 Detected    | 175.3 Detected    | 244 Detected      | Srsf11        | 1.038297872 | 0.74595745 | 1.23356926 | 0.8862487 |
| A_52_P5569 | 18.3 Detected     | 20.3 Detected     | 22.1 Detected     | 19 Not Detect     | Dlx6          | 1.038251366 | 1.20765027 | 0.93596059 | 1.08867   |
| A_55_P1983 | 96.8 Detected     | 74 Detected       | 112.6 Detected    | 100.5 Detected    | Tmed1         | 1.03822314  | 1.16322314 | 1.35810811 | 1.5216216 |
| A_51_P4377 | 29589.9 Detected  | 30860.1 Detected  | 29852.2 Detected  | 30720.2 Detected  | Rbm28         | 1.038198845 | 1.00886451 | 0.99546664 | 0.9673397 |
| A_51_P2055 | 2241.8 Detected   | 2274.4 Detected   | 2742.1 Detected   | 2327.4 Detected   | Crel1         | 1.038183602 | 1.22316888 | 1.02330285 | 1.2056367 |
| A_51_P2735 | 635 Detected      | 531.8 Detected    | 746.2 Detected    | 659.2 Detected    | Ube2g1        | 1.038110236 | 1.17511811 | 1.23956375 | 1.4031591 |
| A_51_P1280 | 3406 Detected     | 3392.7 Detected   | 3964.9 Detected   | 3535.8 Detected   | Prcc          | 1.038109219 | 1.16409278 | 1.0421788  | 1.1686562 |
| A_55_P2183 | 18196.5 Detected  | 15767.1 Detected  | 22117.1 Detected  | 18889.8 Detected  | Gm11449       | 1.038100734 | 1.21545902 | 1.19805164 | 1.4027373 |
| A_55_P2121 | 363286.7 Detected | 374530.3 Detected | 349361.7 Detected | 377112 Detected   | Rps20         | 1.038056169 | 0.96166939 | 1.00689317 | 0.9327996 |
| A_55_P2067 | 1660.8 Detected   | 1360.2 Detected   | 1710.5 Detected   | 1724 Detected     | Tas2r113      | 1.03805395  | 1.02992534 | 1.26746067 | 1.2575357 |
| A_51_P4371 | 16637.4 Detected  | 14172 Detected    | 14216.6 Detected  | 17270 Detected    | Dynll2        | 1.038022768 | 0.8544965  | 1.21860006 | 1.0031471 |
| A_55_P2177 | 15.8 Detected     | 13 Not Detect     | 14.9 Not Detect   | 16.4 Not Detect   | Gm4981        | 1.037974684 | 0.94303797 | 1.26153846 | 1.1461538 |
| A_55_P2144 | 14569.4 Detected  | 12607.5 Detected  | 14779.5 Detected  | 15122.4 Detected  | Nnt           | 1.037956264 | 1.01442064 | 1.1994765  | 1.1722784 |
| A_52_P6861 | 14764.5 Detected  | 10216.4 Detected  | 11128.2 Detected  | 15324.9 Detected  | Prcc2b        | 1.037955908 | 0.7537133  | 1.50002936 | 1.0892487 |
| A_51_P3045 | 5877.7 Detected   | 5046.8 Detected   | 6506.6 Detected   | 6100.7 Detected   | Cluap1        | 1.037940011 | 1.10699764 | 1.20882539 | 1.2892526 |
| A_52_P3087 | 31849.9 Detected  | 36475.8 Detected  | 26577.6 Detected  | 33057.2 Detected  | Gm5176        | 1.037905927 | 0.83446416 | 0.90627759 | 0.7286365 |
| A_55_P1975 | 1277.1 Detected   | 1103.5 Detected   | 989.9 Detected    | 1325.5 Detected   | 2210417A02Rik | 1.037898363 | 0.7751155  | 1.20117807 | 0.8970548 |
| A_55_P1975 | 441 Detected      | 322.2 Detected    | 402.3 Detected    | 457.7 Detected    | Ttc34         | 1.037868481 | 0.9122449  | 1.42054624 | 1.2486034 |
| A_55_P1984 | 947.2 Detected    | 836.2 Detected    | 1032.1 Detected   | 983 Detected      | Smarcc1       | 1.037795608 | 1.0896326  | 1.17555609 | 1.2342741 |
| A_55_P2042 | 33028.6 Detected  | 27483.7 Detected  | 38790.5 Detected  | 34275.7 Detected  | Pigq          | 1.037758185 | 1.17445184 | 1.2471283  | 1.4114002 |
| A_66_P1324 | 10463.5 Detected  | 8296 Detected     | 9242.5 Detected   | 10856.9 Detected  | Siglece       | 1.037597362 | 0.88330864 | 1.30869094 | 1.1140911 |
| A_55_P2086 | 726.4 Detected    | 553.1 Detected    | 624.2 Detected    | 753.7 Detected    | Fam3a         | 1.037582599 | 0.85930617 | 1.36268306 | 1.1285482 |
| A_55_P1954 | 388985.5 Detected | 365896.8 Detected | 343740.6 Detected | 403578.5 Detected | Slc10a1       | 1.037515537 | 0.88368487 | 1.1029845  | 0.9394469 |
| A_51_P2670 | 16 Detected       | 14 Not Detect     | 17.4 Not Detect   | 16.6 Not Detect   | Ugt3a2        | 1.0375      | 1.0875     | 1.18571429 | 1.2428571 |
| A_55_P2214 | 571.5 Detected    | 499.2 Detected    | 649.8 Detected    | 592.9 Detected    | 4930519A11Rik | 1.037445319 | 1.13700787 | 1.18770032 | 1.3016827 |
| A_55_P2143 | 50.8 Detected     | 41.6 Detected     | 51.2 Detected     | 52.7 Detected     | Kcnd1         | 1.037401575 | 1.00787402 | 1.26682692 | 1.2307692 |
| A_66_P1270 | 59379.1 Detected  | 66669.4 Detected  | 60070.1 Detected  | 61596.7 Detected  | Mbd3          | 1.037346474 | 1.01163709 | 0.92391262 | 0.9010146 |
| A_51_P4588 | 34956.1 Detected  | 25308.9 Detected  | 31978.3 Detected  | 36256.1 Detected  | F11r          | 1.037189503 | 0.91481315 | 1.43254349 | 1.2635199 |
| A_51_P1195 | 16685.4 Detected  | 12648.2 Detected  | 16024.2 Detected  | 17305.3 Detected  | Ap3b1         | 1.037152241 | 0.96037254 | 1.36820259 | 1.2669155 |
| A_51_P2207 | 13665.3 Detected  | 12333.9 Detected  | 17429.2 Detected  | 14172.2 Detected  | B230118H07Rik | 1.037093953 | 1.27543486 | 1.1490445  | 1.4131135 |
| A_55_P2038 | 5545.1 Detected   | 4880.3 Detected   | 6256 Detected     | 5750.5 Detected   | Acot8         | 1.037041713 | 1.12820328 | 1.17830871 | 1.2818884 |
| A_55_P2164 | 32.4 Detected     | 29.8 Detected     | 35.6 Detected     | 33.6 Not Detect   | Clec2l        | 1.037037037 | 1.09876543 | 1.12751678 | 1.1946309 |
| A_51_P2534 | 8.1 Not Detect    | 15.6 Detected     | 3 Not Detect      | 8.4 Not Detect    | Ces1g         | 1.037037037 | 0.37037037 | 0.53846154 | 0.1923077 |
| A_55_P1982 | 580.5 Detected    | 543.7 Detected    | 503.8 Detected    | 602 Detected      | Dcaf10        | 1.037037037 | 0.86787252 | 1.10722825 | 0.9266139 |
| A_66_P1273 | 378.7 Detected    | 439.2 Detected    | 442.4 Detected    | 392.7 Detected    | Esco1         | 1.036968577 | 1.16820702 | 0.89412568 | 1.007286  |
| A_55_P2065 | 27.1 Detected     | 27.9 Detected     | 29.9 Detected     | 28.1 Not Detect   | Tcra          | 1.036900369 | 1.10332103 | 1.00716846 | 1.0716846 |
| A_52_P2057 | 3529.9 Detected   | 3847.8 Detected   | 3601 Detected     | 3659.9 Detected   | Unc119b       | 1.036828239 | 1.02014221 | 0.9511669  | 0.9358595 |

|            |          |          |          |          |          |            |          |            |               |             |            |            |           |
|------------|----------|----------|----------|----------|----------|------------|----------|------------|---------------|-------------|------------|------------|-----------|
| A_55_P2134 | 62683.7  | Detected | 75084.9  | Detected | 57343.9  | Detected   | 64984.6  | Detected   | Gm6115        | 1.036706512 | 0.91481358 | 0.86548161 | 0.7637208 |
| A_51_P2467 | 466.1    | Detected | 405.9    | Detected | 358.3    | Detected   | 483.2    | Detected   | Mlxip         | 1.036687406 | 0.76871916 | 1.190441   | 0.8827297 |
| A_55_P2021 | 79.2     | Detected | 75.3     | Detected | 78.3     | Detected   | 82.1     | Detected   | Elk4          | 1.036616162 | 0.98863636 | 1.09030544 | 1.0398406 |
| A_55_P1973 | 6857.1   | Detected | 6957.3   | Detected | 5019.1   | Detected   | 7107.9   | Detected   | Ipo13         | 1.036575229 | 0.73195666 | 1.02164633 | 0.7214149 |
| A_55_P2029 | 318804.5 | Detected | 337973   | Detected | 343070.9 | Detected   | 330454.3 | Detected   | Rpl34         | 1.036542144 | 1.07611687 | 0.97775355 | 1.0150837 |
| A_55_P1961 | 11661    | Detected | 9651.9   | Detected | 10569.4  | Detected   | 12087.1  | Detected   | Usp16         | 1.036540605 | 0.90638882 | 1.25230266 | 1.095059  |
| A_55_P1990 | 840.3    | Detected | 460.8    | Detected | 196.9    | Detected   | 871      | Detected   | Trnp1         | 1.036534571 | 0.23432108 | 1.89019097 | 0.4273003 |
| A_51_P3609 | 1977.2   | Detected | 1649.5   | Detected | 2423.8   | Detected   | 2049.4   | Detected   | Mbtd1         | 1.036516286 | 1.22587497 | 1.2424371  | 1.469415  |
| A_51_P3134 | 2618.9   | Detected | 1564.1   | Detected | 2308.3   | Detected   | 2714.5   | Detected   | Dyrk1a        | 1.036503876 | 0.88140059 | 1.73550285 | 1.4758008 |
| A_52_P1515 | 13.7     | Detected | 15.1     | Detected | 5.2      | Not Detect | 14.2     | Not Detect | Catsperg1     | 1.03649635  | 0.37956204 | 0.94039735 | 0.3443709 |
| A_52_P5556 | 2750     | Detected | 2816.5   | Detected | 3022.9   | Detected   | 2850.1   | Detected   | Vrk1          | 1.0364      | 1.09923636 | 1.0119297  | 1.0732824 |
| A_55_P1976 | 208.9    | Detected | 406.7    | Detected | 136.9    | Detected   | 216.5    | Detected   | A430089I19Rik | 1.036381044 | 0.65533748 | 0.53233342 | 0.3366118 |
| A_55_P2004 | 19440.7  | Detected | 25850.8  | Detected | 23089.5  | Detected   | 20146.5  | Detected   | Hddc2         | 1.036305277 | 1.18768871 | 0.77933758 | 0.8931832 |
| A_65_P0899 | 44.1     | Detected | 38.4     | Detected | 35.6     | Detected   | 45.7     | Detected   | Dzip3         | 1.036281179 | 0.80725624 | 1.19010417 | 0.9270833 |
| A_55_P2326 | 88.3     | Detected | 76.5     | Detected | 72.1     | Detected   | 91.5     | Detected   | 5730408K05Rik | 1.036240091 | 0.81653454 | 1.19607843 | 0.9424837 |
| A_52_P2297 | 18720.4  | Detected | 17088.2  | Detected | 17346.1  | Detected   | 19398.4  | Detected   | Cdc42         | 1.036217175 | 0.92658811 | 1.13519271 | 1.0150923 |
| A_55_P2182 | 249      | Detected | 208.5    | Detected | 225      | Detected   | 258      | Detected   | 4833439L19Rik | 1.036144578 | 0.90361446 | 1.23741007 | 1.0791367 |
| A_51_P3413 | 9987.6   | Detected | 10566.1  | Detected | 8851.6   | Detected   | 10348.2  | Detected   | Acad9         | 1.03610477  | 0.88625896 | 0.97937744 | 0.8377358 |
| A_51_P2185 | 1614.9   | Detected | 1265     | Detected | 1701.7   | Detected   | 1673.2   | Detected   | Fiz1          | 1.036101307 | 1.05374946 | 1.32268775 | 1.3452174 |
| A_52_P7183 | 7404.8   | Detected | 8199.4   | Detected | 6422.7   | Detected   | 7672     | Detected   | Tmem248       | 1.036084702 | 0.86736981 | 0.93567822 | 0.7833134 |
| A_55_P1987 | 344      | Detected | 341.3    | Detected | 358.7    | Detected   | 356.4    | Detected   | Gm4559        | 1.036046512 | 1.04273256 | 1.0442426  | 1.0509815 |
| A_55_P1999 | 749.8    | Detected | 692.1    | Detected | 618      | Detected   | 776.8    | Detected   | Ccdc42        | 1.036009603 | 0.82421979 | 1.12238116 | 0.8929345 |
| A_55_P2036 | 108.4    | Detected | 94.8     | Detected | 76.5     | Detected   | 112.3    | Detected   | Fhl5          | 1.03597786  | 0.70571956 | 1.18459916 | 0.806962  |
| A_66_P1221 | 2821.7   | Detected | 2523.9   | Detected | 2762.4   | Detected   | 2923.2   | Detected   | Mitd1         | 1.035971223 | 0.9789843  | 1.15820754 | 1.0944966 |
| A_55_P2008 | 170568.3 | Detected | 136154.8 | Detected | 170303.5 | Detected   | 176694.9 | Detected   | Prelid1       | 1.035918749 | 0.99844754 | 1.29775006 | 1.2508079 |
| A_51_P2920 | 412.7    | Detected | 410.8    | Detected | 388.7    | Detected   | 427.5    | Detected   | Uts2r         | 1.035861401 | 0.94184638 | 1.04065239 | 0.9462025 |
| A_51_P3206 | 25860.2  | Detected | 26571    | Detected | 22962.1  | Detected   | 26782.7  | Detected   | Txnrnd1       | 1.035672578 | 0.88793203 | 1.00796733 | 0.864179  |
| A_55_P2039 | 949.1    | Detected | 1287.6   | Detected | 997.9    | Detected   | 982.9    | Detected   | Twistnb       | 1.035612686 | 1.05141713 | 0.76335819 | 0.7750078 |
| A_51_P5029 | 10313.3  | Detected | 7489.7   | Detected | 9849.4   | Detected   | 10680.4  | Detected   | Tmem63a       | 1.035594814 | 0.95501925 | 1.42601172 | 1.3150593 |
| A_51_P1716 | 111649.1 | Detected | 107324.5 | Detected | 122867.2 | Detected   | 115621.9 | Detected   | Pebp1         | 1.035582911 | 1.1004764  | 1.07731133 | 1.1448197 |
| A_55_P2017 | 6461.1   | Detected | 4993.4   | Detected | 4978.2   | Detected   | 6691     | Detected   | Macf1         | 1.035582176 | 0.770488   | 1.33996876 | 0.996956  |
| A_55_P2172 | 42.2     | Detected | 58.6     | Detected | 34.1     | Detected   | 43.7     | Not Detect | Gm1123        | 1.035545024 | 0.80805687 | 0.74573379 | 0.5819113 |
| A_52_P5695 | 436.3    | Detected | 256.4    | Detected | 254.8    | Detected   | 451.8    | Detected   | Dcblnd2       | 1.035526014 | 0.58400183 | 1.76209048 | 0.9937598 |
| A_55_P2215 | 93.5     | Detected | 97       | Detected | 76.5     | Detected   | 96.8     | Detected   | 1700102J08Rik | 1.035294118 | 0.81818182 | 0.99793814 | 0.7886598 |
| A_55_P1965 | 774.2    | Detected | 613.6    | Detected | 627.5    | Detected   | 801.4    | Detected   | Uprrt         | 1.035133041 | 0.81051408 | 1.30606258 | 1.0226532 |
| A_55_P2091 | 332831.2 | Detected | 330109.8 | Detected | 355156.4 | Detected   | 344520.4 | Detected   | Rpl38         | 1.035120506 | 1.06707664 | 1.04365396 | 1.0758735 |
| A_55_P2003 | 1560.4   | Detected | 1658.4   | Detected | 1427.2   | Detected   | 1615.2   | Detected   | Asxl2         | 1.0351192   | 0.91463727 | 0.9739508  | 0.8605885 |
| A_55_P1953 | 17.1     | Detected | 19       | Detected | 13.5     | Not Detect | 17.7     | Not Detect | Orly          | 1.035087719 | 0.78947368 | 0.93157895 | 0.7105263 |
| A_55_P2005 | 48.5     | Detected | 31.5     | Detected | 41.6     | Detected   | 50.2     | Detected   | Epb4.1        | 1.035051546 | 0.85773196 | 1.59365079 | 1.3206349 |
| A_55_P2398 | 3615.2   | Detected | 2571.2   | Detected | 3527.2   | Detected   | 3741.8   | Detected   | 4833420G11Rik | 1.035018809 | 0.97565833 | 1.4552738  | 1.3718108 |

|            |          |            |          |            |          |            |          |            |               |             |            |            |           |
|------------|----------|------------|----------|------------|----------|------------|----------|------------|---------------|-------------|------------|------------|-----------|
| A_52_P2701 | 145.7    | Detected   | 133.6    | Detected   | 122.2    | Detected   | 150.8    | Detected   | Spata31d1a    | 1.035003432 | 0.83870968 | 1.12874251 | 0.9146707 |
| A_52_P937  | 13133.3  | Detected   | 12600.3  | Detected   | 15708.5  | Detected   | 13592.8  | Detected   | Spcs2         | 1.034987398 | 1.19608172 | 1.07876797 | 1.2466767 |
| A_55_P2082 | 9156.7   | Detected   | 8294.1   | Detected   | 8510.7   | Detected   | 9476.7   | Detected   | Ak6           | 1.034947088 | 0.92945057 | 1.14258328 | 1.0261149 |
| A_51_P2261 | 45.8     | Detected   | 92.6     | Detected   | 52.1     | Detected   | 47.4     | Detected   | Fastkd2       | 1.034934498 | 1.13755459 | 0.51187905 | 0.562635  |
| A_55_P2173 | 63.1     | Detected   | 69       | Detected   | 53.4     | Detected   | 65.3     | Detected   | Nhs12         | 1.034865293 | 0.84627575 | 0.94637681 | 0.773913  |
| A_55_P2042 | 10793.6  | Detected   | 11500.6  | Detected   | 13748.7  | Detected   | 11167.9  | Detected   | 2210013O21Rik | 1.034677957 | 1.27378261 | 0.97107107 | 1.1954768 |
| A_51_P1606 | 7104.2   | Detected   | 64268.9  | Detected   | 68718.8  | Detected   | 73502.2  | Detected   | Cox7b         | 1.03464187  | 0.96730911 | 1.14366669 | 1.0692388 |
| A_55_P2109 | 236474.6 | Detected   | 259201.9 | Detected   | 245319.9 | Detected   | 244659.1 | Detected   | Rpl23a        | 1.034610482 | 1.03740486 | 0.94389393 | 0.9464433 |
| A_55_P1952 | 35622.4  | Detected   | 32054.3  | Detected   | 39314.3  | Detected   | 36853.4  | Detected   | Timm8a1       | 1.034556908 | 1.10363984 | 1.14971782 | 1.2264907 |
| A_51_P2027 | 4066.7   | Detected   | 3995.8   | Detected   | 3421.7   | Detected   | 4207.2   | Detected   | Zc3h13        | 1.034548897 | 0.84139474 | 1.05290555 | 0.8563241 |
| A_55_P1974 | 697.8    | Detected   | 648.2    | Detected   | 798.2    | Detected   | 721.9    | Detected   | Nsun4         | 1.034537117 | 1.14388077 | 1.11369948 | 1.2314101 |
| A_55_P1973 | 310.1    | Detected   | 362.2    | Detected   | 350.6    | Detected   | 320.8    | Detected   | Mapk8         | 1.034504998 | 1.13060303 | 0.88569851 | 0.9679735 |
| A_52_P1750 | 3008.8   | Detected   | 2395.7   | Detected   | 2255     | Detected   | 3112.6   | Detected   | Usp48         | 1.034498804 | 0.74946823 | 1.29924448 | 0.9412698 |
| A_55_P2319 | 23.2     | Detected   | 26.2     | Detected   | 28.4     | Detected   | 24       | Not Detect | Pou2f3        | 1.034482759 | 1.22413793 | 0.91603053 | 1.0839695 |
| A_55_P2034 | 8.7      | Not Detect | 27.7     | Detected   | 3.7      | Not Detect | 9        | Not Detect | Qrfpr         | 1.034482759 | 0.42528736 | 0.32490975 | 0.133574  |
| A_55_P2177 | 59846    | Detected   | 56229.7  | Detected   | 74453.1  | Detected   | 61907.8  | Detected   | Snrpd2        | 1.03445176  | 1.24407813 | 1.10098044 | 1.3240885 |
| A_51_P4755 | 28173.1  | Detected   | 22425.1  | Detected   | 29763.3  | Detected   | 29142.5  | Detected   | Ndufa8        | 1.034408709 | 1.05644391 | 1.29954827 | 1.3272315 |
| A_55_P2106 | 40571.2  | Detected   | 39889.5  | Detected   | 50345.1  | Detected   | 41967.1  | Detected   | Ndufs2        | 1.03440618  | 1.24090734 | 1.05208388 | 1.2621141 |
| A_51_P3060 | 20637.5  | Detected   | 19474    | Detected   | 19063.4  | Detected   | 21346.7  | Detected   | Eif4g2        | 1.034364627 | 0.92372623 | 1.09616412 | 0.9789155 |
| A_55_P2162 | 15988.4  | Detected   | 11067.7  | Detected   | 17876.4  | Detected   | 16537.6  | Detected   | Dnajc10       | 1.034349904 | 1.11808561 | 1.49422193 | 1.6151865 |
| A_55_P2009 | 90.4     | Detected   | 89.2     | Detected   | 86       | Detected   | 93.5     | Detected   | Gprc5d        | 1.034292035 | 0.95132743 | 1.04820628 | 0.9641256 |
| A_51_P3832 | 17.5     | Detected   | 38       | Detected   | 20       | Detected   | 18.1     | Not Detect | 3110079O15Rik | 1.034285714 | 1.14285714 | 0.47631579 | 0.5263158 |
| A_55_P2000 | 10984.3  | Detected   | 9409.5   | Detected   | 9387.3   | Detected   | 11360.6  | Detected   | Stag2         | 1.034257986 | 0.85461067 | 1.20735427 | 0.9976407 |
| A_55_P2303 | 169.8    | Detected   | 134.3    | Detected   | 239.1    | Detected   | 175.6    | Detected   | Man2c1os      | 1.034157833 | 1.40812721 | 1.30752048 | 1.7803425 |
| A_55_P2240 | 8.8      | Not Detect | 3.3      | Not Detect | 17.9     | Detected   | 9.1      | Not Detect | Zmiz1os1      | 1.034090909 | 2.03409091 | 2.75757576 | 5.4242424 |
| A_55_P1967 | 330189.7 | Detected   | 314152.3 | Detected   | 315605.2 | Detected   | 341442   | Detected   | Med16         | 1.034078289 | 0.95582994 | 1.08686774 | 1.0046248 |
| A_55_P1994 | 14474.8  | Detected   | 14627    | Detected   | 14121.3  | Detected   | 14965.5  | Detected   | Ythdc1        | 1.033900296 | 0.97557825 | 1.02314213 | 0.965427  |
| A_55_P1952 | 342.2    | Detected   | 304.6    | Detected   | 250      | Detected   | 353.8    | Detected   | Rps6ka3       | 1.033898305 | 0.73056692 | 1.16152331 | 0.8207485 |
| A_55_P2020 | 20810.9  | Detected   | 20371.2  | Detected   | 19692.9  | Detected   | 21515.3  | Detected   | Tmem234       | 1.033847647 | 0.94627815 | 1.05616262 | 0.966703  |
| A_55_P2154 | 108365.6 | Detected   | 123412.9 | Detected   | 113230.4 | Detected   | 112030.7 | Detected   | Gm12770       | 1.033821619 | 1.04489248 | 0.90777139 | 0.9174924 |
| A_51_P5197 | 2801.5   | Detected   | 3449.2   | Detected   | 3155.6   | Detected   | 2896.2   | Detected   | Ska3          | 1.03380332  | 1.12639657 | 0.83967297 | 0.9148788 |
| A_55_P1972 | 299.2    | Detected   | 197      | Detected   | 325      | Detected   | 309.3    | Detected   | Mtcp1         | 1.033756684 | 1.08622995 | 1.57005076 | 1.6497462 |
| A_55_P2137 | 35.6     | Detected   | 147.7    | Detected   | 46.4     | Detected   | 36.8     | Not Detect | Trpv4         | 1.033707865 | 1.30337079 | 0.24915369 | 0.3141503 |
| A_52_P2149 | 1772.1   | Detected   | 1811.9   | Detected   | 2110.8   | Detected   | 1831.8   | Detected   | Zmynd8        | 1.033688844 | 1.19112917 | 1.01098295 | 1.164965  |
| A_51_P5084 | 39962.9  | Detected   | 35461.1  | Detected   | 47386.4  | Detected   | 41308.4  | Detected   | St13          | 1.033668728 | 1.18575979 | 1.16489336 | 1.3362924 |
| A_52_P3580 | 22882.7  | Detected   | 21323.9  | Detected   | 21916.4  | Detected   | 23653    | Detected   | Ppp2ca        | 1.033662986 | 0.95777159 | 1.10922486 | 1.0277857 |
| A_51_P3342 | 142.6    | Detected   | 158      | Detected   | 127.7    | Detected   | 147.4    | Detected   | Gucylb2       | 1.033660589 | 0.89551192 | 0.93291139 | 0.8082278 |
| A_51_P3433 | 60770.8  | Detected   | 72477.3  | Detected   | 71771.4  | Detected   | 62813.3  | Detected   | Cox6c         | 1.033609892 | 1.18101786 | 0.8666617  | 0.9902604 |
| A_55_P2103 | 27937.6  | Detected   | 29042.7  | Detected   | 33326.8  | Detected   | 28876.4  | Detected   | Mrpl30        | 1.033603459 | 1.19290132 | 0.99427395 | 1.1475104 |
| A_55_P1970 | 342.3    | Detected   | 261      | Detected   | 352.8    | Detected   | 353.8    | Detected   | Kdm3b         | 1.033596261 | 1.03067485 | 1.35555556 | 1.3517241 |

|            |          |            |          |            |          |            |          |            |               |             |            |            |           |
|------------|----------|------------|----------|------------|----------|------------|----------|------------|---------------|-------------|------------|------------|-----------|
| A_55_P2227 | 2988.6   | Detected   | 1957     | Detected   | 1749.3   | Detected   | 3088.3   | Detected   | Zbtb38        | 1.033360102 | 0.58532423 | 1.57807869 | 0.8938682 |
| A_55_P1976 | 17904    | Detected   | 17472.8  | Detected   | 20492.3  | Detected   | 18501.2  | Detected   | Arf5          | 1.033335675 | 1.14456546 | 1.0588572  | 1.1728115 |
| A_55_P2060 | 8639.4   | Detected   | 6082.1   | Detected   | 9019.8   | Detected   | 8927.4   | Detected   | Mov10         | 1.033335648 | 1.04403084 | 1.46781539 | 1.4830075 |
| A_55_P1966 | 15       | Detected   | 12.2     | Not Detect | 10.3     | Not Detect | 15.5     | Not Detect | Kbtbd13       | 1.033333333 | 0.68666667 | 1.2704918  | 0.8442623 |
| A_65_P1663 | 114.5    | Detected   | 181.8    | Detected   | 103.8    | Detected   | 118.3    | Detected   | BC068281      | 1.033187773 | 0.90655022 | 0.65071507 | 0.5709571 |
| A_51_P3169 | 9.1      | Not Detect | 17.7     | Detected   | 3.8      | Not Detect | 9.4      | Not Detect | Svopl         | 1.032967033 | 0.41758242 | 0.53107345 | 0.2146893 |
| A_51_P4500 | 18126.3  | Detected   | 11236.8  | Detected   | 19792.5  | Detected   | 18722.8  | Detected   | Higd2a        | 1.032907985 | 1.09192168 | 1.6662039  | 1.7614    |
| A_66_P1246 | 1368.7   | Detected   | 1622.9   | Detected   | 1669.3   | Detected   | 1413.7   | Detected   | Ubxn2a        | 1.032877913 | 1.21962446 | 0.87109495 | 1.0285908 |
| A_55_P2067 | 112.9    | Detected   | 71.8     | Detected   | 108.2    | Detected   | 116.6    | Detected   | Dclre1c       | 1.032772365 | 0.95837024 | 1.62395543 | 1.5069638 |
| A_55_P2114 | 268857.8 | Detected   | 269355.2 | Detected   | 244470   | Detected   | 277658.2 | Detected   | Actg1         | 1.032732545 | 0.90929108 | 1.03082547 | 0.907612  |
| A_55_P2112 | 180.3    | Detected   | 220.6    | Detected   | 209.4    | Detected   | 186.2    | Detected   | 1110008L16Rik | 1.032723239 | 1.16139767 | 0.84406165 | 0.9492294 |
| A_55_P2129 | 372.9    | Detected   | 244.6    | Detected   | 385.2    | Detected   | 385.1    | Detected   | Inpp5f        | 1.032716546 | 1.03298471 | 1.5744072  | 1.574816  |
| A_55_P1976 | 399517.9 | Detected   | 397156.5 | Detected   | 385366.1 | Detected   | 412578.3 | Detected   | Ppia          | 1.0326904   | 0.96457781 | 1.03883054 | 0.970313  |
| A_66_P1334 | 263.4    | Detected   | 321.5    | Detected   | 225.3    | Detected   | 272      | Detected   | Dnajb9        | 1.032649962 | 0.85535308 | 0.84603421 | 0.7007776 |
| A_51_P1146 | 25031.9  | Detected   | 9020.1   | Detected   | 21734.6  | Detected   | 25848.8  | Detected   | Parm1         | 1.032634359 | 0.86827608 | 2.86568885 | 2.4095742 |
| A_55_P2050 | 4665.5   | Detected   | 4027.5   | Detected   | 4924.7   | Detected   | 4817.6   | Detected   | Tlr7          | 1.032601007 | 1.05555675 | 1.19617629 | 1.2227685 |
| A_51_P4646 | 6381.9   | Detected   | 5399.6   | Detected   | 5366.5   | Detected   | 6589.7   | Detected   | Rad17         | 1.032560836 | 0.84089378 | 1.22040522 | 0.9938699 |
| A_55_P2040 | 21676    | Detected   | 22271.6  | Detected   | 19624.2  | Detected   | 22378    | Detected   | Sec62         | 1.032386049 | 0.90534231 | 1.00477738 | 0.8811311 |
| A_51_P4245 | 1170.4   | Detected   | 996.6    | Detected   | 1406.7   | Detected   | 1208.3   | Detected   | Zfp93         | 1.032382092 | 1.20189679 | 1.21242224 | 1.4114991 |
| A_55_P2120 | 58.7     | Detected   | 45       | Detected   | 55.1     | Detected   | 60.6     | Detected   | Mefv          | 1.032367973 | 0.93867121 | 1.34666667 | 1.2244444 |
| A_55_P2172 | 284764.8 | Detected   | 296755.5 | Detected   | 319201.8 | Detected   | 293976.3 | Detected   | LOC100504872  | 1.032347748 | 1.12093138 | 0.99063471 | 1.075639  |
| A_55_P2086 | 12576.6  | Detected   | 10978.1  | Detected   | 10387.5  | Detected   | 12983.3  | Detected   | Uhmk1         | 1.032337834 | 0.82593865 | 1.18265456 | 0.946202  |
| A_51_P3089 | 16828    | Detected   | 18251.2  | Detected   | 20762.4  | Detected   | 17371    | Detected   | Tamm41        | 1.032267649 | 1.23380081 | 0.95177303 | 1.137591  |
| A_55_P1963 | 18.6     | Detected   | 14.5     | Not Detect | 22.6     | Detected   | 19.2     | Not Detect | Gm11595       | 1.032258065 | 1.21505376 | 1.32413793 | 1.5586207 |
| A_55_P2004 | 20006.6  | Detected   | 24545.9  | Detected   | 22491.6  | Detected   | 20651.8  | Detected   | Emc6          | 1.032249358 | 1.12420901 | 0.84135436 | 0.9163078 |
| A_55_P2076 | 24.9     | Detected   | 35.6     | Detected   | 29.9     | Detected   | 25.7     | Not Detect | Tdpoz4        | 1.032128514 | 1.20080321 | 0.72191011 | 0.8398876 |
| A_55_P1997 | 1785     | Detected   | 1937.2   | Detected   | 1758.7   | Detected   | 1842.3   | Detected   | Hsd17b7       | 1.03210084  | 0.98526611 | 0.95101177 | 0.9078567 |
| A_51_P3922 | 2283     | Detected   | 3457.5   | Detected   | 999.9    | Detected   | 2356.1   | Detected   | Pdk3          | 1.032019273 | 0.43797635 | 0.68144613 | 0.2891974 |
| A_55_P1976 | 2480     | Detected   | 3349.4   | Detected   | 2429.4   | Detected   | 2559.4   | Detected   | Spata5        | 1.032016129 | 0.97959677 | 0.76413686 | 0.7253239 |
| A_52_P6723 | 11515.4  | Detected   | 9010.9   | Detected   | 12554.7  | Detected   | 11883.9  | Detected   | Exoc5         | 1.032000625 | 1.09025305 | 1.31883608 | 1.3932793 |
| A_55_P2149 | 21509.4  | Detected   | 17231.1  | Detected   | 21464.5  | Detected   | 22197.2  | Detected   | Ngfrap1       | 1.031976717 | 0.99791254 | 1.28820563 | 1.2456837 |
| A_51_P4367 | 12413.8  | Detected   | 13649.1  | Detected   | 12709.9  | Detected   | 12809.9  | Detected   | Eftud2        | 1.031908038 | 1.02385249 | 0.93851609 | 0.9311896 |
| A_55_P2024 | 404.9    | Detected   | 464.1    | Detected   | 422.1    | Detected   | 417.8    | Detected   | Eral1         | 1.031859718 | 1.04247962 | 0.90023702 | 0.9095023 |
| A_55_P2040 | 144289.7 | Detected   | 100729.6 | Detected   | 159919.4 | Detected   | 148885.3 | Detected   | Swi5          | 1.031849813 | 1.10832166 | 1.47806901 | 1.5876108 |
| A_52_P2477 | 1416.6   | Detected   | 1438.4   | Detected   | 2179.4   | Detected   | 1461.7   | Detected   | Ino80c        | 1.031836792 | 1.5384724  | 1.01619855 | 1.5151557 |
| A_55_P2031 | 355.4    | Detected   | 322.4    | Detected   | 357.3    | Detected   | 366.7    | Detected   | Brd1          | 1.03179516  | 1.00534609 | 1.13740695 | 1.1082506 |
| A_51_P2446 | 24556.3  | Detected   | 25658.8  | Detected   | 24519.2  | Detected   | 25336.7  | Detected   | Ube2b         | 1.031780032 | 0.99848919 | 0.9874468  | 0.9555864 |
| A_51_P4886 | 412687.9 | Detected   | 431146.7 | Detected   | 412955.3 | Detected   | 425788.5 | Detected   | Gnb211        | 1.03174457  | 1.00064795 | 0.98757221 | 0.9578069 |
| A_55_P1984 | 66.3     | Detected   | 53.3     | Detected   | 53.1     | Detected   | 68.4     | Detected   | Rhox3h        | 1.031674208 | 0.80090498 | 1.28330206 | 0.9962477 |
| A_55_P2083 | 205.5    | Detected   | 154      | Detected   | 100      | Detected   | 212      | Detected   | Necab3        | 1.03163017  | 0.486618   | 1.37662338 | 0.6493506 |

|            |          |          |          |          |          |            |          |            |               |             |            |            |           |
|------------|----------|----------|----------|----------|----------|------------|----------|------------|---------------|-------------|------------|------------|-----------|
| A_55_P2073 | 2547.3   | Detected | 2852.1   | Detected | 2924.1   | Detected   | 2627.7   | Detected   | Mrpl47        | 1.031562831 | 1.14792133 | 0.92132113 | 1.0252446 |
| A_55_P2045 | 3910.6   | Detected | 3330     | Detected | 3828.2   | Detected   | 4033.9   | Detected   | Gpkow         | 1.031529689 | 0.97892906 | 1.21138138 | 1.1496096 |
| A_51_P1520 | 520.5    | Detected | 384.6    | Detected | 614.7    | Detected   | 536.9    | Detected   | Zfp385a       | 1.031508165 | 1.18097983 | 1.39599584 | 1.5982839 |
| A_66_P1391 | 832.8    | Detected | 933.4    | Detected | 618      | Detected   | 859      | Detected   | Baz1a         | 1.031460134 | 0.74207493 | 0.92029141 | 0.6620956 |
| A_55_P2013 | 77604.7  | Detected | 63926.6  | Detected | 80786    | Detected   | 80028.2  | Detected   | Serpinp6c     | 1.031228779 | 1.04099365 | 1.25187637 | 1.2637306 |
| A_55_P2033 | 634.2    | Detected | 533.3    | Detected | 630.5    | Detected   | 654      | Detected   | Mmab          | 1.031220435 | 0.99416588 | 1.22632665 | 1.1822614 |
| A_65_P1654 | 9892.1   | Detected | 8079.4   | Detected | 8625.1   | Detected   | 10200.8  | Detected   | Zmiz1         | 1.031206721 | 0.871918   | 1.262569   | 1.0675421 |
| A_51_P4630 | 1559.8   | Detected | 1550     | Detected | 1763     | Detected   | 1608.3   | Detected   | Cenpm         | 1.03109373  | 1.13027311 | 1.0376129  | 1.1374194 |
| A_55_P2074 | 35.4     | Detected | 62.8     | Detected | 68.9     | Detected   | 36.5     | Not Detect | Tgif2         | 1.031073446 | 1.94632768 | 0.58121019 | 1.0971338 |
| A_55_P2096 | 33907.6  | Detected | 35101.4  | Detected | 39919.8  | Detected   | 34959.9  | Detected   | Gm6238        | 1.03103434  | 1.17731128 | 0.99596882 | 1.1372709 |
| A_55_P2074 | 72815.7  | Detected | 81337.7  | Detected | 54098.2  | Detected   | 75070.7  | Detected   | Gm2710        | 1.030968596 | 0.74294692 | 0.92295086 | 0.6651061 |
| A_51_P3654 | 9421.8   | Detected | 8841.3   | Detected | 12581.6  | Detected   | 9713.2   | Detected   | Clpb          | 1.030928273 | 1.33537116 | 1.09861672 | 1.4230486 |
| A_55_P2153 | 288.3    | Detected | 169.4    | Detected | 177.2    | Detected   | 297.2    | Detected   | Zkscan3       | 1.030870621 | 0.61463753 | 1.75442739 | 1.0460449 |
| A_55_P2027 | 11298.7  | Detected | 11275.5  | Detected | 9930.8   | Detected   | 11647.2  | Detected   | Usp1          | 1.030844256 | 0.87893297 | 1.03296528 | 0.8807414 |
| A_51_P3478 | 4137.6   | Detected | 4595.3   | Detected | 3971.9   | Detected   | 4265.2   | Detected   | Actn1         | 1.030839134 | 0.95995263 | 0.92816573 | 0.8643397 |
| A_66_P1067 | 35.7     | Detected | 34.1     | Detected | 30.9     | Detected   | 36.8     | Not Detect | Magi2         | 1.030812325 | 0.86554622 | 1.07917889 | 0.9061584 |
| A_55_P1971 | 35.7     | Detected | 44.4     | Detected | 51.3     | Detected   | 36.8     | Not Detect | Kif13b        | 1.030812325 | 1.43697479 | 0.82882883 | 1.1554054 |
| A_55_P2022 | 2943.4   | Detected | 2950.4   | Detected | 3124.6   | Detected   | 3034     | Detected   | Tcerg1        | 1.03078073  | 1.06156146 | 1.02833514 | 1.0590428 |
| A_55_P2115 | 22.8     | Detected | 29.4     | Detected | 19       | Detected   | 23.5     | Not Detect | Mast4         | 1.030701754 | 0.83333333 | 0.79931973 | 0.6462585 |
| A_55_P2013 | 261115.3 | Detected | 263839.3 | Detected | 257204.3 | Detected   | 269125.2 | Detected   | LOC101055915  | 1.030675721 | 0.98502194 | 1.02003454 | 0.9748521 |
| A_55_P2009 | 290.4    | Detected | 212.7    | Detected | 233.3    | Detected   | 299.3    | Detected   | Ptbp3         | 1.030647383 | 0.80337466 | 1.40714622 | 1.09685   |
| A_51_P1712 | 31233.4  | Detected | 18084.7  | Detected | 38925.3  | Detected   | 32188.8  | Detected   | Golm1         | 1.030589049 | 1.24627162 | 1.77989129 | 2.1523885 |
| A_55_P2160 | 285105.8 | Detected | 262113.8 | Detected | 255404   | Detected   | 293786.7 | Detected   | Cxcl11        | 1.030447995 | 0.89582183 | 1.12083645 | 0.9744012 |
| A_55_P2047 | 26.3     | Detected | 26.9     | Detected | 12.6     | Not Detect | 27.1     | Not Detect | Osbpl7        | 1.030418251 | 0.47908745 | 1.00743494 | 0.4684015 |
| A_51_P4717 | 32366.5  | Detected | 34767.9  | Detected | 37763    | Detected   | 33350.5  | Detected   | Phf5a         | 1.030401804 | 1.16673103 | 0.95923251 | 1.0861456 |
| A_55_P2030 | 187.6    | Detected | 156.2    | Detected | 121.6    | Detected   | 193.3    | Detected   | 2610301B20Rik | 1.030383795 | 0.64818763 | 1.23751601 | 0.7784891 |
| A_66_P1145 | 46.4     | Detected | 36.9     | Detected | 50.5     | Detected   | 47.8     | Detected   | 4930597O21Rik | 1.030172414 | 1.08836207 | 1.29539295 | 1.3685637 |
| A_55_P2047 | 19.9     | Detected | 24       | Detected | 17.7     | Detected   | 20.5     | Not Detect | Dad1          | 1.030150754 | 0.88944724 | 0.85416667 | 0.7375    |
| A_55_P2155 | 144593.7 | Detected | 148544   | Detected | 149125.6 | Detected   | 148952   | Detected   | Gm9457        | 1.030141701 | 1.03134231 | 1.00274666 | 1.0039153 |
| A_52_P3501 | 1832.5   | Detected | 1528.8   | Detected | 1633.5   | Detected   | 1887.7   | Detected   | Cyth1         | 1.030122783 | 0.89140518 | 1.23475929 | 1.0684851 |
| A_55_P2109 | 156768.3 | Detected | 152495.5 | Detected | 186777.8 | Detected   | 161488.6 | Detected   | Rps15a        | 1.030110041 | 1.19142582 | 1.05897289 | 1.2248086 |
| A_52_P5761 | 9624.3   | Detected | 9007.1   | Detected | 8786.6   | Detected   | 9913     | Detected   | Sh2b1         | 1.029996987 | 0.9129599  | 1.10057621 | 0.9755193 |
| A_55_P2117 | 8593.1   | Detected | 6183.3   | Detected | 13008    | Detected   | 8850.5   | Detected   | Nck2          | 1.029954266 | 1.51377268 | 1.43135543 | 2.103731  |
| A_52_P4097 | 66.8     | Detected | 62.5     | Detected | 55       | Detected   | 68.8     | Detected   | Serpinc1      | 1.02994012  | 0.82335329 | 1.1008     | 0.88      |
| A_55_P2209 | 1157.8   | Detected | 1024.1   | Detected | 966.5    | Detected   | 1192.4   | Detected   | 2610002J23Rik | 1.029884263 | 0.83477285 | 1.16433942 | 0.9437555 |
| A_55_P2038 | 20815.8  | Detected | 20794.6  | Detected | 19620    | Detected   | 21437.1  | Detected   | Tmem234       | 1.02984752  | 0.94255325 | 1.03089744 | 0.9435142 |
| A_55_P1989 | 127.6    | Detected | 76.2     | Detected | 484.5    | Detected   | 131.4    | Detected   | Entpd8        | 1.029780564 | 3.79702194 | 1.72440945 | 6.3582677 |
| A_51_P3314 | 2895.2   | Detected | 3337.2   | Detected | 3111.1   | Detected   | 2981.4   | Detected   | Cgrrf1        | 1.029773418 | 1.0745717  | 0.89338367 | 0.9322486 |
| A_55_P2154 | 43.7     | Detected | 40.8     | Detected | 47.9     | Detected   | 45       | Detected   | Mtap7d3       | 1.029748284 | 1.09610984 | 1.10294118 | 1.1740196 |
| A_51_P1547 | 1045.2   | Detected | 1617.6   | Detected | 730.5    | Detected   | 1076.2   | Detected   | Klc3          | 1.029659395 | 0.6989093  | 0.66530663 | 0.451595  |



|            |                   |                   |                   |                   |               |             |            |            |           |
|------------|-------------------|-------------------|-------------------|-------------------|---------------|-------------|------------|------------|-----------|
| A_52_P3774 | 37.1 Detected     | 37.3 Detected     | 22.7 Detected     | 38.2 Not Detect   | Olf1r1122     | 1.029649596 | 0.61185984 | 1.02412869 | 0.6085791 |
| A_55_P1968 | 33.8 Detected     | 52.9 Detected     | 12.5 Not Detect   | 34.8 Not Detect   | Atp1b2        | 1.029585799 | 0.36982249 | 0.65784499 | 0.2362949 |
| A_66_P1270 | 23.7 Detected     | 30 Detected       | 24.8 Detected     | 24.4 Not Detect   | Gm12273       | 1.029535865 | 1.0464135  | 0.81333333 | 0.8266667 |
| A_65_P1550 | 2373.8 Detected   | 2587.7 Detected   | 2334.4 Detected   | 2443.9 Detected   | Map3k2        | 1.02953071  | 0.98340214 | 0.94442942 | 0.9021138 |
| A_55_P2063 | 337804.6 Detected | 318853.4 Detected | 351396.2 Detected | 347767.7 Detected | Rps5          | 1.029493678 | 1.04023509 | 1.09068211 | 1.102062  |
| A_55_P1973 | 84.9 Detected     | 81.9 Detected     | 76.5 Detected     | 87.4 Detected     | Foxh1         | 1.029446408 | 0.90106007 | 1.06715507 | 0.9340659 |
| A_55_P2023 | 27.2 Detected     | 28 Detected       | 11 Not Detect     | 28 Not Detect     | Ccr7          | 1.029411765 | 0.40441176 | 1          | 0.3928571 |
| A_55_P2372 | 156.5 Detected    | 160.8 Detected    | 99.5 Detected     | 161.1 Detected    | Nfat5         | 1.029392971 | 0.63578275 | 1.00186567 | 0.6187811 |
| A_51_P2896 | 2282.9 Detected   | 2651 Detected     | 2078.7 Detected   | 2349.9 Detected   | Nek4          | 1.029348636 | 0.91055237 | 0.88642022 | 0.7841192 |
| A_55_P1966 | 9939 Detected     | 8640.4 Detected   | 11818.4 Detected  | 10230.4 Detected  | Polr2h        | 1.029318845 | 1.18909347 | 1.18401926 | 1.367807  |
| A_55_P2103 | 170.7 Detected    | 188.6 Detected    | 193.9 Detected    | 175.7 Detected    | Cdh12         | 1.029291154 | 1.13591095 | 0.93160127 | 1.0281018 |
| A_51_P4083 | 1065.3 Detected   | 868.6 Detected    | 771.8 Detected    | 1096.5 Detected   | Cfp           | 1.029287525 | 0.72449075 | 1.26237624 | 0.8885563 |
| A_51_P1218 | 13167.5 Detected  | 12543.2 Detected  | 15222.7 Detected  | 13552.4 Detected  | Prkag1        | 1.029231061 | 1.15608126 | 1.08045794 | 1.2136217 |
| A_52_P5359 | 2142.6 Detected   | 2086.2 Detected   | 2276.7 Detected   | 2205.2 Detected   | Sde2          | 1.029216839 | 1.06258751 | 1.05704151 | 1.0913144 |
| A_51_P2526 | 48439.1 Detected  | 31703.7 Detected  | 44402.9 Detected  | 49851.7 Detected  | 1110007C09Rik | 1.029162392 | 0.91667475 | 1.5724253  | 1.4005589 |
| A_55_P2038 | 12479.4 Detected  | 9638.1 Detected   | 13540.9 Detected  | 12842.3 Detected  | BC005624      | 1.029079924 | 1.08506018 | 1.33245142 | 1.4049346 |
| A_55_P2119 | 23820.5 Detected  | 23488.7 Detected  | 4130 Detected     | 24512.6 Detected  | Serpine1      | 1.029054806 | 0.17338007 | 1.04359117 | 0.1758292 |
| A_55_P1976 | 144.7 Detected    | 148.4 Detected    | 175.2 Detected    | 148.9 Detected    | Cacna2d2      | 1.02902557  | 1.21078093 | 1.00336927 | 1.180593  |
| A_51_P4788 | 1903.8 Detected   | 1541.3 Detected   | 1851.7 Detected   | 1959 Detected     | Ppp6r1        | 1.028994642 | 0.97263368 | 1.271005   | 1.2013884 |
| A_55_P2011 | 2152.6 Detected   | 2177.1 Detected   | 2147.4 Detected   | 2215 Detected     | Lce1j         | 1.0289882   | 0.99758432 | 1.01740848 | 0.986358  |
| A_55_P2065 | 2187.2 Detected   | 2398.3 Detected   | 2702 Detected     | 2250.6 Detected   | Gm11559       | 1.028986832 | 1.23536942 | 0.93841471 | 1.1266314 |
| A_55_P2017 | 389.9 Detected    | 520.6 Detected    | 316.1 Detected    | 401.2 Detected    | B020031M17Rik | 1.02898179  | 0.8107207  | 0.77064925 | 0.607184  |
| A_55_P2171 | 8620.8 Detected   | 8490.2 Detected   | 6503.6 Detected   | 8870.4 Detected   | BC030867      | 1.028953229 | 0.75440794 | 1.04478104 | 0.7660126 |
| A_52_P1396 | 12970.9 Detected  | 13907.3 Detected  | 10299.9 Detected  | 13345.8 Detected  | Ska1          | 1.02890316  | 0.79407751 | 0.95962552 | 0.740611  |
| A_55_P2086 | 93.5 Detected     | 79.8 Detected     | 81.2 Detected     | 96.2 Detected     | Gm2061        | 1.028877005 | 0.8684492  | 1.20551378 | 1.0175439 |
| A_55_P2325 | 24260 Detected    | 19643 Detected    | 19383.9 Detected  | 24960 Detected    | Arhgap1       | 1.028854081 | 0.7990066  | 1.27068167 | 0.9868096 |
| A_55_P2191 | 457.5 Detected    | 412 Detected      | 428.6 Detected    | 470.7 Detected    | 4931440J10Rik | 1.028852459 | 0.9368306  | 1.14247573 | 1.0402913 |
| A_55_P2066 | 5653.7 Detected   | 4722.3 Detected   | 6305.4 Detected   | 5816.6 Detected   | Arfp2         | 1.02881299  | 1.11526965 | 1.2317303  | 1.3352392 |
| A_55_P2084 | 476504.1 Detected | 438598.2 Detected | 495718.9 Detected | 490224.1 Detected | Hist1h2ah     | 1.028793037 | 1.04032452 | 1.11770659 | 1.1302347 |
| A_55_P2159 | 28891.3 Detected  | 25251.8 Detected  | 33656 Detected    | 29721.7 Detected  | Rfc4          | 1.028742217 | 1.16491816 | 1.17701312 | 1.3328159 |
| A_52_P5330 | 1231.8 Detected   | 1058.2 Detected   | 1168.2 Detected   | 1267.2 Detected   | Dnajc16       | 1.028738432 | 0.94836824 | 1.1975052  | 1.1039501 |
| A_52_P5143 | 2048.7 Detected   | 1680.8 Detected   | 2131.3 Detected   | 2107.4 Detected   | Spata2        | 1.028652316 | 1.04031825 | 1.25380771 | 1.2680271 |
| A_55_P2022 | 17799.6 Detected  | 14956.2 Detected  | 20106.2 Detected  | 18309.5 Detected  | Gtf2h5        | 1.028646711 | 1.12958718 | 1.22420802 | 1.3443388 |
| A_55_P2135 | 3316.6 Detected   | 2738.2 Detected   | 3448.6 Detected   | 3411.6 Detected   | Polr2i        | 1.028643792 | 1.03979979 | 1.24592798 | 1.2594405 |
| A_55_P2089 | 77 Detected       | 81.2 Detected     | 65.7 Detected     | 79.2 Detected     | Rhox7         | 1.028571429 | 0.85324675 | 0.97536946 | 0.8091133 |
| A_51_P4798 | 869.3 Detected    | 979.4 Detected    | 657.4 Detected    | 894.1 Detected    | Mapk6         | 1.028528701 | 0.75624065 | 0.91290586 | 0.6712273 |
| A_55_P2092 | 9325.8 Detected   | 8865.1 Detected   | 8054.5 Detected   | 9591.6 Detected   | Apoo          | 1.028501576 | 0.86367926 | 1.08195057 | 0.9085628 |
| A_51_P4666 | 984 Detected      | 1358.3 Detected   | 952.1 Detected    | 1012 Detected     | Srsf7         | 1.028455285 | 0.9675813  | 0.74504896 | 0.7009497 |
| A_55_P2133 | 73.9 Detected     | 95.3 Detected     | 67.4 Detected     | 76 Detected       | LOC101056066  | 1.028416779 | 0.9120433  | 0.79748164 | 0.7072403 |
| A_55_P2058 | 9179.5 Detected   | 12857.9 Detected  | 10457.6 Detected  | 9440.2 Detected   | Ipo5          | 1.02840024  | 1.13923416 | 0.73419454 | 0.813321  |

|            |          |          |          |          |          |            |          |            |               |             |            |            |           |
|------------|----------|----------|----------|----------|----------|------------|----------|------------|---------------|-------------|------------|------------|-----------|
| A_55_P2089 | 71749.5  | Detected | 69852    | Detected | 63225.8  | Detected   | 73781.8  | Detected   | Ncoa5         | 1.028324936 | 0.88120196 | 1.05625895 | 0.9051394 |
| A_51_P2330 | 1670.3   | Detected | 1332.1   | Detected | 1467.6   | Detected   | 1717.6   | Detected   | Rmdn3         | 1.028318266 | 0.87864455 | 1.28939269 | 1.1017191 |
| A_55_P2003 | 63934    | Detected | 82782.1  | Detected | 80060.1  | Detected   | 65744    | Detected   | Lsm7          | 1.028310445 | 1.25223043 | 0.79418135 | 0.9671185 |
| A_52_P3390 | 4891.5   | Detected | 4695     | Detected | 4605.8   | Detected   | 5029.5   | Detected   | Nap114        | 1.028212205 | 0.94159256 | 1.07124601 | 0.9810011 |
| A_55_P2036 | 7944.8   | Detected | 7302.5   | Detected | 7491.8   | Detected   | 8168.6   | Detected   | Dhx30         | 1.028169369 | 0.94298157 | 1.11860322 | 1.0259226 |
| A_55_P1994 | 63437.1  | Detected | 72154.7  | Detected | 65381.7  | Detected   | 65221.9  | Detected   | Ptges3        | 1.028134956 | 1.03065399 | 0.90391755 | 0.9061322 |
| A_55_P2176 | 2157.9   | Detected | 2441.4   | Detected | 2739.4   | Detected   | 2218.6   | Detected   | 1110057K04Rik | 1.0281292   | 1.26947495 | 0.90874089 | 1.1220611 |
| A_55_P2157 | 28.5     | Detected | 34.4     | Detected | 11.6     | Not Detect | 29.3     | Not Detect | Ear10         | 1.028070175 | 0.40701754 | 0.85174419 | 0.3372093 |
| A_55_P1953 | 4803     | Detected | 2520.3   | Detected | 3027.9   | Detected   | 4937.7   | Detected   | Stx2          | 1.028044972 | 0.63041849 | 1.95917153 | 1.2014046 |
| A_55_P2007 | 35.8     | Detected | 41.8     | Detected | 26.9     | Detected   | 36.8     | Not Detect | Kcnc1         | 1.027932961 | 0.75139665 | 0.88038278 | 0.6435407 |
| A_55_P2022 | 17.9     | Detected | 22.1     | Detected | 12.1     | Not Detect | 18.4     | Not Detect | Sly           | 1.027932961 | 0.67597765 | 0.83257919 | 0.5475113 |
| A_55_P2014 | 179801.7 | Detected | 173958.8 | Detected | 186264.1 | Detected   | 184819.6 | Detected   | Rpl4          | 1.027907967 | 1.03594182 | 1.06243317 | 1.0707369 |
| A_55_P2168 | 56793.6  | Detected | 54930.5  | Detected | 65534.7  | Detected   | 58377.7  | Detected   | Atp5k         | 1.027892227 | 1.15390995 | 1.06275566 | 1.1930476 |
| A_55_P2098 | 2901     | Detected | 2662.8   | Detected | 2403.8   | Detected   | 2981.8   | Detected   | 4931406P16Rik | 1.027852465 | 0.82861082 | 1.11979871 | 0.902734  |
| A_51_P4620 | 8750.2   | Detected | 9144.5   | Detected | 8241.2   | Detected   | 8993.9   | Detected   | Prpf38a       | 1.027850792 | 0.9418299  | 0.98353108 | 0.9012193 |
| A_51_P1634 | 11413.6  | Detected | 5791     | Detected | 10666.2  | Detected   | 11730.4  | Detected   | Carhsp1       | 1.027756361 | 0.93451672 | 2.02562597 | 1.8418581 |
| A_55_P2098 | 50.5     | Detected | 44.8     | Detected | 37.5     | Detected   | 51.9     | Detected   | Krtap5-5      | 1.027722772 | 0.74257426 | 1.15848214 | 0.8370536 |
| A_55_P2164 | 12474.1  | Detected | 11032.2  | Detected | 11267.9  | Detected   | 12818.6  | Detected   | Nploc4        | 1.027617223 | 0.90330365 | 1.161926   | 1.0213647 |
| A_55_P2099 | 620      | Detected | 511.8    | Detected | 652.5    | Detected   | 637.1    | Detected   | H2afv         | 1.027580645 | 1.05241935 | 1.2448222  | 1.2749121 |
| A_55_P2168 | 5702.6   | Detected | 4556     | Detected | 5249.2   | Detected   | 5859.4   | Detected   | Mcmbp         | 1.02749623  | 0.92049241 | 1.28608428 | 1.152151  |
| A_52_P4318 | 40798.7  | Detected | 45009.5  | Detected | 47735.4  | Detected   | 41917.2  | Detected   | Ptcd3         | 1.027415089 | 1.17002257 | 0.93129673 | 1.0605628 |
| A_51_P1452 | 1533     | Detected | 1221.1   | Detected | 1161.9   | Detected   | 1575     | Detected   | Sall4         | 1.02739726  | 0.75792564 | 1.28982065 | 0.9515191 |
| A_55_P2158 | 4168.6   | Detected | 3005.5   | Detected | 2691.5   | Detected   | 4282.7   | Detected   | Rnf39         | 1.0273713   | 0.64566041 | 1.42495425 | 0.8955249 |
| A_51_P1054 | 6104.7   | Detected | 6460.7   | Detected | 5678.8   | Detected   | 6271.4   | Detected   | Alg14         | 1.027306829 | 0.93023408 | 0.97069977 | 0.878976  |
| A_55_P1980 | 77577    | Detected | 76680.4  | Detected | 67077.4  | Detected   | 79694.3  | Detected   | Tardbp        | 1.027292883 | 0.86465576 | 1.0393047  | 0.8747659 |
| A_55_P2133 | 187.5    | Detected | 163.5    | Detected | 181.2    | Detected   | 192.6    | Detected   | C030034I22Rik | 1.0272      | 0.9664     | 1.17798165 | 1.1082569 |
| A_52_P2473 | 592.2    | Detected | 779.1    | Detected | 583.5    | Detected   | 608.3    | Detected   | Xpo4          | 1.027186761 | 0.98530902 | 0.78077269 | 0.7489411 |
| A_55_P1992 | 127156.8 | Detected | 120423.1 | Detected | 110645.2 | Detected   | 130592.4 | Detected   | Vdac1         | 1.02701861  | 0.87014772 | 1.08444642 | 0.9188038 |
| A_55_P1957 | 4410.8   | Detected | 2897.2   | Detected | 4090.6   | Detected   | 4529.9   | Detected   | Dhx34         | 1.027001904 | 0.92740546 | 1.56354411 | 1.411915  |
| A_55_P2122 | 26063.5  | Detected | 21266.5  | Detected | 21049.5  | Detected   | 26765.9  | Detected   | Snta1         | 1.026949565 | 0.80762369 | 1.2585945  | 0.9897962 |
| A_66_P1227 | 8174.4   | Detected | 7595.7   | Detected | 10399.6  | Detected   | 8394.3   | Detected   | Zmat2         | 1.026901057 | 1.2722157  | 1.10513843 | 1.3691431 |
| A_51_P1788 | 2275.9   | Detected | 1653.4   | Detected | 2876     | Detected   | 2337.1   | Detected   | Ttc9c         | 1.026890461 | 1.26367591 | 1.41351155 | 1.739446  |
| A_55_P1969 | 13906.1  | Detected | 12267.5  | Detected | 11193.9  | Detected   | 14278    | Detected   | Hnrnpr        | 1.026743659 | 0.80496329 | 1.16388832 | 0.9124842 |
| A_55_P1952 | 9382     | Detected | 7297.6   | Detected | 8850.6   | Detected   | 9632.9   | Detected   | Dnm1l         | 1.026742699 | 0.94335962 | 1.32000932 | 1.2128097 |
| A_55_P2048 | 583.5    | Detected | 424      | Detected | 632.7    | Detected   | 599.1    | Detected   | Mzf1          | 1.026735219 | 1.08431877 | 1.4129717  | 1.492217  |
| A_51_P5066 | 1784.3   | Detected | 1741.1   | Detected | 1774.6   | Detected   | 1832     | Detected   | Fbxw7         | 1.026733173 | 0.99456369 | 1.05220837 | 1.0192407 |
| A_52_P7918 | 975.1    | Detected | 617.6    | Detected | 692.3    | Detected   | 1001.1   | Detected   | Ankrd12       | 1.026663932 | 0.70997846 | 1.62095207 | 1.1209521 |
| A_55_P2171 | 3075.5   | Detected | 3279.4   | Detected | 2641     | Detected   | 3157.5   | Detected   | Clk4          | 1.026662331 | 0.85872216 | 0.96282857 | 0.8053302 |
| A_55_P2157 | 774.6    | Detected | 660.7    | Detected | 696.5    | Detected   | 795.2    | Detected   | Skint9        | 1.026594371 | 0.89917377 | 1.20357197 | 1.054185  |
| A_52_P2985 | 1291.6   | Detected | 1390.3   | Detected | 958.8    | Detected   | 1325.9   | Detected   | Nbn           | 1.026556209 | 0.74233509 | 0.95367906 | 0.6896353 |

|            |          |            |          |            |          |            |          |            |               |             |             |            |            |           |
|------------|----------|------------|----------|------------|----------|------------|----------|------------|---------------|-------------|-------------|------------|------------|-----------|
| A_55_P1954 | 396746.6 | Detected   | 367640.5 | Detected   | 356347.8 | Detected   | 407244.7 | Detected   | Elk1          | 1.026460466 | 0.8981748   | 1.10772535 | 0.9692833  |           |
| A_55_P1983 | 518.2    | Detected   | 531.6    | Detected   | 308.3    | Detected   | 531.9    | Detected   | Ano8          | 1.026437669 | 0.59494404  | 1.00056433 | 0.5799473  |           |
| A_51_P2796 | 871      | Detected   | 909.3    | Detected   | 1346.7   | Detected   | 894      | Detected   | Socs1         | 1.026406429 | 1.54615385  | 0.98317387 | 1.4810294  |           |
| A_55_P2011 | 15.2     | Detected   | 277.4    | Detected   | 8.2      | Not Detect | 15.6     | Not Detect | Syna          | 1.026315789 | 0.53947368  | 0.05623648 | 0.0295602  |           |
| A_52_P1914 | 4112.2   | Detected   | 4117.5   | Detected   | 4954.5   | Detected   | 4220     | Detected   | Ubfd1         | 1.026214678 | 1.20482953  | 1.02489375 | 1.2032787  |           |
| A_51_P3403 | 4582.7   | Detected   | 2908     | Detected   | 3801.3   | Detected   | 4702.6   | Detected   | Tarsl2        | 1.026163615 | 0.82948917  | 1.61712517 | 1.3071871  |           |
| A_52_P1233 | 3798.2   | Detected   | 2924.5   | Detected   | 5541.8   | Detected   | 3897.2   | Detected   | Tusc2         | 1.026064978 | 1.45905955  | 1.33260386 | 1.8949564  |           |
| A_55_P2404 | 88.5     | Detected   | 58.8     | Detected   | 79.5     | Detected   | 90.8     | Detected   | Nup188        | 1.025988701 | 0.89830508  | 1.54421769 | 1.3520408  |           |
| A_55_P2047 | 253064.6 | Detected   | 226798.3 | Detected   | 222654.3 | Detected   | 259637.2 | Detected   | Arhgdia       | 1.025972025 | 0.87983187  | 1.14479341 | 0.9817283  |           |
| A_55_P2037 | 30312.1  | Detected   | 32259.8  | Detected   | 31392.4  | Detected   | 31098.7  | Detected   | Foxl2         | 1.025950033 | 1.03563923  | 0.96400784 | 0.973112   |           |
| A_65_P0498 | 5250.7   | Detected   | 3836.7   | Detected   | 5242.1   | Detected   | 5386.9   | Detected   | Ilf3          | 1.025939399 | 0.99836212  | 1.40404514 | 1.3663044  |           |
| A_55_P1959 | 2895.9   | Detected   | 2074.6   | Detected   | 2756.4   | Detected   | 2970.8   | Detected   | Top3b         | 1.025864153 | 0.95182845  | 1.43198689 | 1.3286417  |           |
| A_55_P2033 | 227137.9 | Detected   | 246513   | Detected   | 269276.1 | Detected   | 232999.2 | Detected   | Gm8680        | 1.025805029 | 1.18551814  | 0.94518017 | 1.0923404  |           |
| A_55_P1972 | 566.5    | Detected   | 575.8    | Detected   | 580.8    | Detected   | 581.1    | Detected   | Espnl         | 1.025772286 | 1.02524272  | 1.00920458 | 1.0086836  |           |
| A_52_P5333 | 33982.1  | Detected   | 40218.9  | Detected   | 35002.6  | Detected   | 34854.9  | Detected   | Eif5          | 1.02568411  | 1.03003052  | 0.86662987 | 0.8703023  |           |
| A_51_P2144 | 46678.1  | Detected   | 37838.1  | Detected   | 48940.8  | Detected   | 47876.3  | Detected   |               | 2-Sep       | 1.025669425 | 1.04847455 | 1.26529345 | 1.2934265 |
| A_51_P4365 | 35.2     | Detected   | 21.1     | Detected   | 19.1     | Detected   | 36.1     | Not Detect | 1700003E16Rik | 1.025568182 | 0.54261364  | 1.71090047 | 0.9052133  |           |
| A_55_P2177 | 1740.8   | Detected   | 1527.4   | Detected   | 1438.6   | Detected   | 1785.3   | Detected   | Kcna6         | 1.02556296  | 0.82640165  | 1.16884902 | 0.941862   |           |
| A_55_P1996 | 30619.5  | Detected   | 33868.4  | Detected   | 30631.6  | Detected   | 31400.8  | Detected   | Sf3b4         | 1.025516419 | 1.00039517  | 0.92714152 | 0.9044301  |           |
| A_51_P5203 | 15260.2  | Detected   | 15951.4  | Detected   | 15548.4  | Detected   | 15647.9  | Detected   | Atp1b3        | 1.025405958 | 1.01888573  | 0.98097346 | 0.9747358  |           |
| A_55_P1965 | 63       | Detected   | 48.5     | Detected   | 25.5     | Detected   | 64.6     | Detected   | 3110007F17Rik | 1.025396825 | 0.4047619   | 1.33195876 | 0.5257732  |           |
| A_55_P2012 | 35298.2  | Detected   | 27590.7  | Detected   | 35542.5  | Detected   | 36193.7  | Detected   | Sdha          | 1.025369566 | 1.00692103  | 1.31180796 | 1.2882058  |           |
| A_55_P1965 | 196517.9 | Detected   | 170728.9 | Detected   | 217946.7 | Detected   | 201498.7 | Detected   | Gm4889        | 1.025345274 | 1.10904248  | 1.18022608 | 1.2765659  |           |
| A_55_P2167 | 23.7     | Detected   | 23.1     | Detected   | 27.7     | Detected   | 24.3     | Not Detect | Gm10723       | 1.025316456 | 1.16877637  | 1.05194805 | 1.1991342  |           |
| A_55_P2084 | 47886.1  | Detected   | 42577.6  | Detected   | 52786.4  | Detected   | 49097.4  | Detected   | Gm2099        | 1.025295441 | 1.10233241  | 1.15312747 | 1.2397693  |           |
| A_51_P1187 | 731      | Detected   | 1090.1   | Detected   | 786.6    | Detected   | 749.4    | Detected   | Drp2          | 1.025170999 | 1.07606019  | 0.68745987 | 0.7215852  |           |
| A_55_P1960 | 136233.3 | Detected   | 129370.9 | Detected   | 160451.2 | Detected   | 139657.9 | Detected   | Rps15a        | 1.02513776  | 1.17776784  | 1.07951556 | 1.2402418  |           |
| A_55_P2166 | 45190.6  | Detected   | 47982.1  | Detected   | 52169.7  | Detected   | 46323.1  | Detected   | Mrps16        | 1.025060521 | 1.15443698  | 0.96542461 | 1.0872742  |           |
| A_52_P4178 | 1050.1   | Detected   | 939.8    | Detected   | 953.9    | Detected   | 1076.4   | Detected   | Gid4          | 1.025045234 | 0.90838968  | 1.14535007 | 1.0150032  |           |
| A_51_P4262 | 32636.9  | Detected   | 28750.2  | Detected   | 31021.1  | Detected   | 33453    | Detected   | Dhx30         | 1.025005439 | 0.95049162  | 1.16357451 | 1.0789873  |           |
| A_55_P2000 | 12       | Not Detect | 25.1     | Detected   | 11.1     | Not Detect | 12.3     | Not Detect | Rhox4a        | 1.025       | 0.925       | 0.49003984 | 0.4422311  |           |
| A_55_P2176 | 52       | Detected   | 41.5     | Detected   | 35.2     | Detected   | 53.3     | Detected   | Pcdh15        | 1.025       | 0.67692308  | 1.28433735 | 0.8481928  |           |
| A_51_P2836 | 5264     | Detected   | 3988.5   | Detected   | 3998.2   | Detected   | 5395.5   | Detected   | Brat1         | 1.024981003 | 0.75953647  | 1.3527642  | 1.002432   |           |
| A_55_P2141 | 272.3    | Detected   | 272.5    | Detected   | 367.8    | Detected   | 279.1    | Detected   | Ppp6r3        | 1.024972457 | 1.35071612  | 1.02422018 | 1.3497248  |           |
| A_55_P1993 | 6053     | Detected   | 4901.9   | Detected   | 6635.6   | Detected   | 6203.9   | Detected   | Rab9          | 1.024929787 | 1.09624979  | 1.26561129 | 1.3536792  |           |
| A_52_P4582 | 212.6    | Detected   | 167.9    | Detected   | 205.6    | Detected   | 217.9    | Detected   | Prlr          | 1.024929445 | 0.96707432  | 1.29779631 | 1.2245384  |           |
| A_51_P2672 | 51537.1  | Detected   | 35063.3  | Detected   | 48846.9  | Detected   | 52820    | Detected   | Litaf         | 1.024892747 | 0.94780071  | 1.50641839 | 1.3931062  |           |
| A_55_P2085 | 657.6    | Detected   | 949.3    | Detected   | 569.2    | Detected   | 673.9    | Detected   | Zfat          | 1.024787105 | 0.86557178  | 0.7098915  | 0.5995997  |           |
| A_51_P2369 | 40.4     | Detected   | 42.5     | Detected   | 31.9     | Detected   | 41.4     | Not Detect | 1700001P01Rik | 1.024752475 | 0.78960396  | 0.97411765 | 0.7505882  |           |
| A_55_P2077 | 16.2     | Detected   | 6.4      | Not Detect | 18.2     | Not Detect | 16.6     | Not Detect | Ahdcl         | 1.024691358 | 1.12345679  | 2.59375    | 2.84375    |           |

|            |         |          |         |          |         |          |         |          |               |             |            |            |           |
|------------|---------|----------|---------|----------|---------|----------|---------|----------|---------------|-------------|------------|------------|-----------|
| A_51_P4161 | 6133.5  | Detected | 5859.3  | Detected | 4789.3  | Detected | 6284.6  | Detected | Hectd1        | 1.0246352   | 0.78084291 | 1.07258546 | 0.8173843 |
| A_52_P3125 | 987     | Detected | 1220.4  | Detected | 1349    | Detected | 1011.3  | Detected | Rnmt          | 1.024620061 | 1.36676798 | 0.82866273 | 1.1053753 |
| A_52_P5227 | 514.6   | Detected | 449.4   | Detected | 697.7   | Detected | 527.2   | Detected | Zfp846        | 1.024485037 | 1.35581034 | 1.17311972 | 1.5525145 |
| A_55_P1955 | 2799.9  | Detected | 2184.6  | Detected | 2717.6  | Detected | 2868.3  | Detected | Gm6710        | 1.024429444 | 0.97060609 | 1.31296347 | 1.2439806 |
| A_55_P2096 | 176.1   | Detected | 217.5   | Detected | 263.2   | Detected | 180.4   | Detected | Myo5b         | 1.024417944 | 1.49460534 | 0.82942529 | 1.2101149 |
| A_55_P2109 | 90.2    | Detected | 66.1    | Detected | 50.1    | Detected | 92.4    | Detected | Myo19         | 1.024390244 | 0.55543237 | 1.397882   | 0.7579425 |
| A_55_P2091 | 3225.4  | Detected | 8993.9  | Detected | 2531.7  | Detected | 3304    | Detected | Padi2         | 1.024369071 | 0.7849259  | 0.3673601  | 0.2814908 |
| A_52_P6549 | 737.7   | Detected | 239.7   | Detected | 909.7   | Detected | 755.6   | Detected | Iqgap2        | 1.024264606 | 1.23315711 | 3.15227368 | 3.7951606 |
| A_55_P2176 | 50849.1 | Detected | 61675   | Detected | 58809.4 | Detected | 52081.2 | Detected | Psma5         | 1.024230517 | 1.15654751 | 0.84444589 | 0.9535371 |
| A_66_P1072 | 3170.1  | Detected | 3369.5  | Detected | 3066.9  | Detected | 3246.8  | Detected | Nom1          | 1.02419482  | 0.96744582 | 0.9635851  | 0.9101944 |
| A_51_P1706 | 18929.9 | Detected | 19791.4 | Detected | 23976.1 | Detected | 19387.9 | Detected | Haus1         | 1.024194528 | 1.26657299 | 0.97961236 | 1.2114403 |
| A_52_P4456 | 1005    | Detected | 725.7   | Detected | 697.9   | Detected | 1029.2  | Detected | 2610002M06Rik | 1.024079602 | 0.69442786 | 1.41821689 | 0.9616922 |
| A_55_P2022 | 3027.5  | Detected | 3213.2  | Detected | 3145.3  | Detected | 3100.4  | Detected | 5430417L22Rik | 1.024079273 | 1.03890999 | 0.96489481 | 0.9788684 |
| A_66_P1250 | 8124.2  | Detected | 9812.2  | Detected | 9578.2  | Detected | 8318.8  | Detected | Snrpd1        | 1.023953128 | 1.17897147 | 0.84780172 | 0.9761521 |
| A_55_P2061 | 69083.1 | Detected | 73940.3 | Detected | 66852.8 | Detected | 70736.6 | Detected | Cks1b         | 1.023934942 | 0.96771569 | 0.9566718  | 0.9041456 |
| A_51_P3928 | 3977.2  | Detected | 2977.1  | Detected | 3693.9  | Detected | 4072.3  | Detected | Med25         | 1.023911294 | 0.92876898 | 1.36787478 | 1.2407712 |
| A_52_P1997 | 2468.2  | Detected | 2566.6  | Detected | 2324.1  | Detected | 2527.2  | Detected | Snhg7         | 1.02390406  | 0.94161737 | 0.98464895 | 0.905517  |
| A_52_P2309 | 5182.1  | Detected | 7732.3  | Detected | 6233.4  | Detected | 5305.8  | Detected | Wdr18         | 1.023870632 | 1.20287142 | 0.68618652 | 0.8061508 |
| A_55_P2027 | 683.2   | Detected | 523.9   | Detected | 797.5   | Detected | 699.5   | Detected | Pxk           | 1.023858314 | 1.16730094 | 1.33517847 | 1.5222371 |
| A_55_P2244 | 285.7   | Detected | 285.4   | Detected | 452.4   | Detected | 292.5   | Detected | Amotl1        | 1.02380119  | 1.58347917 | 1.02487737 | 1.5851437 |
| A_55_P2105 | 2800.7  | Detected | 1794.6  | Detected | 3897.8  | Detected | 2867.3  | Detected | Ralgapa2      | 1.023779769 | 1.3917235  | 1.59773766 | 2.1719603 |
| A_51_P3272 | 67311.2 | Detected | 62122.2 | Detected | 64473.7 | Detected | 68910.9 | Detected | Akr1a1        | 1.023765733 | 0.95784505 | 1.10927977 | 1.0378528 |
| A_66_P1014 | 1604    | Detected | 1141.9  | Detected | 1719.6  | Detected | 1642.1  | Detected | Acat3         | 1.023753117 | 1.07206983 | 1.43804186 | 1.5059112 |
| A_55_P2017 | 50.6    | Detected | 45.7    | Detected | 44.4    | Detected | 51.8    | Detected | Gm4975        | 1.023715415 | 0.87747036 | 1.13347921 | 0.9715536 |
| A_55_P2016 | 63472.9 | Detected | 58363.6 | Detected | 74160.6 | Detected | 64969.8 | Detected | Eif3k         | 1.023583293 | 1.1683821  | 1.11319041 | 1.2706653 |
| A_51_P1178 | 7353.4  | Detected | 5062.5  | Detected | 4986.9  | Detected | 7526.8  | Detected | Fam20c        | 1.023580929 | 0.67817608 | 1.48677531 | 0.9850667 |
| A_52_P4407 | 288.5   | Detected | 128.4   | Detected | 210.3   | Detected | 295.3   | Detected | Ryr2          | 1.023570191 | 0.72894281 | 2.29984424 | 1.6378505 |
| A_55_P2018 | 6776.9  | Detected | 5602.1  | Detected | 8194.4  | Detected | 6936.6  | Detected | Gorasp2       | 1.023565347 | 1.20916643 | 1.23821424 | 1.4627372 |
| A_55_P2065 | 382.2   | Detected | 332.2   | Detected | 382.6   | Detected | 391.2   | Detected | Krtap19-5     | 1.023547881 | 1.00104657 | 1.17760385 | 1.1517158 |
| A_55_P1977 | 22614.2 | Detected | 27162.1 | Detected | 25477   | Detected | 23146.2 | Detected | Wbp11         | 1.023525042 | 1.12659303 | 0.85215061 | 0.9379614 |
| A_55_P2152 | 233.9   | Detected | 248.3   | Detected | 213.2   | Detected | 239.4   | Detected | Plekhm3       | 1.023514322 | 0.91150064 | 0.96415626 | 0.8586387 |
| A_55_P2327 | 1010.8  | Detected | 781.7   | Detected | 633.3   | Detected | 1034.5  | Detected | 1500032P08Rik | 1.023446775 | 0.62653344 | 1.32339772 | 0.8101573 |
| A_52_P2317 | 9602.1  | Detected | 10684.8 | Detected | 11725.7 | Detected | 9826.9  | Detected | Actl6a        | 1.023411545 | 1.22115995 | 0.91970837 | 1.0974188 |
| A_55_P1982 | 23303.5 | Detected | 23670.2 | Detected | 17759.3 | Detected | 23849   | Detected | Eps8          | 1.023408501 | 0.76208724 | 1.0075538  | 0.7502809 |
| A_55_P2237 | 51.6    | Detected | 48.3    | Detected | 35.4    | Detected | 52.8    | Detected | A730028G07Rik | 1.023255814 | 0.68604651 | 1.0931677  | 0.7329193 |
| A_55_P2062 | 15746.6 | Detected | 12155.2 | Detected | 17020.2 | Detected | 16112.7 | Detected | Abca3         | 1.023249463 | 1.08088095 | 1.32558082 | 1.4002402 |
| A_55_P2113 | 1240.4  | Detected | 899.4   | Detected | 1432.6  | Detected | 1269.2  | Detected | Gm20749       | 1.023218317 | 1.15495002 | 1.411163   | 1.5928397 |
| A_65_P1581 | 3933.7  | Detected | 3148.1  | Detected | 3467.2  | Detected | 4025    | Detected | Pum1          | 1.023209701 | 0.88140936 | 1.27854897 | 1.1013627 |
| A_55_P2119 | 126.1   | Detected | 106.8   | Detected | 118.9   | Detected | 129     | Detected | Gm10228       | 1.022997621 | 0.94290246 | 1.20786517 | 1.1132959 |
| A_52_P4244 | 752.8   | Detected | 639.5   | Detected | 414.3   | Detected | 770.1   | Detected | Ero11b        | 1.022980871 | 0.55034538 | 1.20422205 | 0.6478499 |

|            |          |          |          |          |          |          |          |            |               |                   |            |            |           |
|------------|----------|----------|----------|----------|----------|----------|----------|------------|---------------|-------------------|------------|------------|-----------|
| A_52_P4024 | 2212.7   | Detected | 1784.8   | Detected | 2561.7   | Detected | 2263.5   | Detected   | Zfp746        | 1.022958377       | 1.15772586 | 1.26820932 | 1.4352869 |
| A_55_P2178 | 143.9    | Detected | 130.2    | Detected | 173.6    | Detected | 147.2    | Detected   | Tll1          | 1.022932592       | 1.20639333 | 1.13056836 | 1.3333333 |
| A_51_P3478 | 20745.7  | Detected | 22758.8  | Detected | 20137.2  | Detected | 21220.8  | Detected   | Ipo4          | 1.022901131       | 0.97066862 | 0.93242174 | 0.8848094 |
| A_55_P2255 | 385      | Detected | 364.5    | Detected | 305.1    | Detected | 393.8    | Detected   | 9430013L14Rik | 1.022857143       | 0.79246753 | 1.08038409 | 0.837037  |
| A_55_P2122 | 628.5    | Detected | 601      | Detected | 605.6    | Detected | 642.8    | Detected   | Zfp14         | 1.022752586       | 0.96356404 | 1.06955075 | 1.0076539 |
| A_51_P4741 | 5088.8   | Detected | 1401.4   | Detected | 10694.6  | Detected | 5204.5   | Detected   | Proser2       | 1.022736205       | 2.10159566 | 3.71378621 | 7.6313686 |
| A_51_P3672 | 325.8    | Detected | 285.4    | Detected | 452.8    | Detected | 333.2    | Detected   |               | 8-Sep 1.022713321 | 1.3898097  | 1.16748423 | 1.5865452 |
| A_55_P2037 | 5509.7   | Detected | 4930.6   | Detected | 4889.1   | Detected | 5634.8   | Detected   | Exoc2         | 1.02270541        | 0.88736229 | 1.14282237 | 0.9915832 |
| A_52_P9393 | 5949.2   | Detected | 7148.7   | Detected | 5589     | Detected | 6083.9   | Detected   | Mcl1          | 1.0226417         | 0.93945404 | 0.85104984 | 0.7818205 |
| A_55_P2040 | 2234.3   | Detected | 3337.5   | Detected | 2077     | Detected | 2284.8   | Detected   | Tnni2         | 1.022602157       | 0.92959764 | 0.68458427 | 0.6223221 |
| A_55_P1957 | 6801.7   | Detected | 6734.2   | Detected | 5857.3   | Detected | 6955.3   | Detected   | Las1l         | 1.02258259        | 0.86115236 | 1.03283241 | 0.8697841 |
| A_51_P2076 | 31       | Detected | 34.1     | Detected | 34.7     | Detected | 31.7     | Not Detect | Fmod          | 1.022580645       | 1.11935484 | 0.92961877 | 1.0175953 |
| A_55_P1984 | 305.7    | Detected | 269.5    | Detected | 267.5    | Detected | 312.6    | Detected   | Polr2i        | 1.022571148       | 0.87504089 | 1.15992579 | 0.9925788 |
| A_52_P5128 | 33597.4  | Detected | 23210.8  | Detected | 29077.5  | Detected | 34354.3  | Detected   | Shisa5        | 1.022528529       | 0.86546876 | 1.48009978 | 1.2527573 |
| A_51_P4277 | 1129.6   | Detected | 951.8    | Detected | 1107.8   | Detected | 1155     | Detected   | Diap1         | 1.022485836       | 0.98070113 | 1.21349023 | 1.1639    |
| A_55_P2142 | 3457     | Detected | 2661.5   | Detected | 2275.2   | Detected | 3534.6   | Detected   | Mark4         | 1.022447209       | 0.6581429  | 1.32804809 | 0.8548563 |
| A_55_P2083 | 6445.9   | Detected | 6355.6   | Detected | 6304.6   | Detected | 6590.5   | Detected   | Pum2          | 1.022432864       | 0.97807909 | 1.03695953 | 0.9919756 |
| A_51_P2046 | 767.6    | Detected | 888.4    | Detected | 858.6    | Detected | 784.8    | Detected   | Thg1l         | 1.022407504       | 1.11855133 | 0.88338586 | 0.9664566 |
| A_51_P2906 | 11194.2  | Detected | 9839.2   | Detected | 13273    | Detected | 11444.6  | Detected   | Znhit2        | 1.022368727       | 1.18570331 | 1.16316367 | 1.3489918 |
| A_51_P2049 | 10254.8  | Detected | 8387.1   | Detected | 10827.9  | Detected | 10483.9  | Detected   | Bag2          | 1.022340757       | 1.05588602 | 1.25000298 | 1.2910183 |
| A_55_P2001 | 76.1     | Detected | 79.2     | Detected | 66.8     | Detected | 77.8     | Detected   | Gpr31b        | 1.022339028       | 0.87779238 | 0.98232323 | 0.8434343 |
| A_55_P2027 | 393948.8 | Detected | 385120.1 | Detected | 403488.9 | Detected | 402746.5 | Detected   | Rpl41         | 1.02233209        | 1.0242166  | 1.04576858 | 1.0476963 |
| A_52_P4494 | 12840    | Detected | 9862.9   | Detected | 10780.6  | Detected | 13126.3  | Detected   | Vangl1        | 1.022297508       | 0.83961059 | 1.33087631 | 1.0930457 |
| A_55_P2009 | 2244.7   | Detected | 1863.4   | Detected | 2022.6   | Detected | 2294.6   | Detected   | Nkg7          | 1.022230142       | 0.90105582 | 1.23140496 | 1.0854352 |
| A_55_P2003 | 157.5    | Detected | 158.2    | Detected | 147.6    | Detected | 161      | Detected   | H2-T24        | 1.022222222       | 0.93714286 | 1.01769912 | 0.9329962 |
| A_55_P1959 | 90       | Detected | 111.1    | Detected | 98.1     | Detected | 92       | Detected   | Tmem40        | 1.022222222       | 1.09       | 0.82808281 | 0.8829883 |
| A_51_P4881 | 1648.1   | Detected | 1534.7   | Detected | 1437.7   | Detected | 1684.7   | Detected   | Phf20l1       | 1.02220739        | 0.87233784 | 1.09773897 | 0.9367955 |
| A_55_P1994 | 2086.5   | Detected | 1808.5   | Detected | 1255.6   | Detected | 2132.7   | Detected   | Usp31         | 1.022142344       | 0.6017733  | 1.17926458 | 0.694277  |
| A_55_P2048 | 280.2    | Detected | 602.1    | Detected | 97.5     | Detected | 286.4    | Detected   | Aig1          | 1.022127052       | 0.34796574 | 0.47566849 | 0.1619332 |
| A_55_P2044 | 18.1     | Detected | 17.4     | Detected | 18.4     | Detected | 18.5     | Not Detect | Prdm13        | 1.022099448       | 1.01657459 | 1.06321839 | 1.0574713 |
| A_51_P3829 | 2650.1   | Detected | 1907.5   | Detected | 2429.1   | Detected | 2708.6   | Detected   | Fadd          | 1.022074639       | 0.91660692 | 1.41997379 | 1.2734469 |
| A_55_P2062 | 40.8     | Detected | 27.2     | Detected | 43.2     | Detected | 41.7     | Not Detect | Mtnr1a        | 1.022058824       | 1.05882353 | 1.53308824 | 1.5882353 |
| A_55_P2011 | 7608.5   | Detected | 8528.2   | Detected | 9039.2   | Detected | 7776.1   | Detected   | St7           | 1.022027995       | 1.18803969 | 0.91181023 | 1.0599189 |
| A_66_P1114 | 7035     | Detected | 7154.7   | Detected | 6808.9   | Detected | 7189.7   | Detected   | Fbxw8         | 1.02199005        | 0.9678607  | 1.00489189 | 0.9516681 |
| A_51_P2845 | 13946.1  | Detected | 12757.2  | Detected | 16729.5  | Detected | 14252.3  | Detected   | Hyal2         | 1.021955959       | 1.19958268 | 1.11719656 | 1.3113771 |
| A_51_P3174 | 3786.9   | Detected | 4499.3   | Detected | 3510.6   | Detected | 3870     | Detected   | Cd3eap        | 1.02194407        | 0.92703795 | 0.8601338  | 0.7802547 |
| A_55_P2143 | 1700     | Detected | 1103.3   | Detected | 1467.8   | Detected | 1737.3   | Detected   | Dyrk1a        | 1.021941176       | 0.86341176 | 1.57463972 | 1.3303725 |
| A_55_P2042 | 2923.3   | Detected | 2652.3   | Detected | 2064.9   | Detected | 2987.3   | Detected   | Slc25a22      | 1.021893066       | 0.70635925 | 1.12630547 | 0.7785318 |
| A_52_P5880 | 253      | Detected | 271.8    | Detected | 257      | Detected | 258.5    | Detected   | Intu          | 1.02173913        | 1.01581028 | 0.95106696 | 0.9455482 |
| A_52_P6778 | 880.7    | Detected | 1165.1   | Detected | 680.3    | Detected | 899.8    | Detected   | Tmem5         | 1.021687294       | 0.77245373 | 0.77229422 | 0.5838984 |

|            |          |            |          |          |          |            |          |            |               |             |            |            |           |
|------------|----------|------------|----------|----------|----------|------------|----------|------------|---------------|-------------|------------|------------|-----------|
| A_55_P2023 | 39215.9  | Detected   | 35658.3  | Detected | 50965    | Detected   | 40060.9  | Detected   | Fen1          | 1.021547383 | 1.29960042 | 1.12346635 | 1.4292605 |
| A_55_P1968 | 5933.2   | Detected   | 7374.1   | Detected | 4458.7   | Detected   | 6060.7   | Detected   | Ccrn4l        | 1.021489247 | 0.75148318 | 0.82189013 | 0.6046433 |
| A_52_P6510 | 6159.1   | Detected   | 7711.1   | Detected | 5280     | Detected   | 6291.4   | Detected   | Tmx1          | 1.021480411 | 0.85726811 | 0.81588878 | 0.6847272 |
| A_52_P5027 | 88.6     | Detected   | 23.4     | Detected | 53.4     | Detected   | 90.5     | Detected   | Ampd3         | 1.021444695 | 0.6027088  | 3.86752137 | 2.2820513 |
| A_51_P1613 | 9215.7   | Detected   | 10823.4  | Detected | 8138.3   | Detected   | 9413.3   | Detected   | Gnl2          | 1.02144167  | 0.88309081 | 0.86971746 | 0.7519171 |
| A_51_P1007 | 8415.6   | Detected   | 9106.3   | Detected | 8168.7   | Detected   | 8595.5   | Detected   | Snw1          | 1.021376967 | 0.97066163 | 0.94390697 | 0.8970383 |
| A_55_P1963 | 60648.4  | Detected   | 65989.4  | Detected | 64319.8  | Detected   | 61940.3  | Detected   | Ptma          | 1.021301469 | 1.06053581 | 0.93864015 | 0.974699  |
| A_55_P1982 | 5577.1   | Detected   | 10119.8  | Detected | 4925.6   | Detected   | 5695.9   | Detected   | Tma16         | 1.021301393 | 0.88318302 | 0.56284709 | 0.486729  |
| A_55_P2126 | 27093.9  | Detected   | 25798    | Detected | 28540.7  | Detected   | 27670.6  | Detected   | Pgam5         | 1.021285234 | 1.05339947 | 1.07258702 | 1.1063144 |
| A_55_P2330 | 287.4    | Detected   | 346.5    | Detected | 256.4    | Detected   | 293.5    | Detected   | 4930554C24Rik | 1.021224774 | 0.8921364  | 0.84704185 | 0.7399711 |
| A_51_P4861 | 184.2    | Detected   | 197.2    | Detected | 626.8    | Detected   | 188.1    | Detected   | Ocln          | 1.021172638 | 3.40282302 | 0.95385396 | 3.178499  |
| A_55_P1979 | 2640.2   | Detected   | 3042.7   | Detected | 2989.3   | Detected   | 2696.1   | Detected   | Dapp1         | 1.021172638 | 1.13222483 | 0.88608801 | 0.9824498 |
| A_55_P2062 | 9233     | Detected   | 6952.5   | Detected | 9382.5   | Detected   | 9428.2   | Detected   | Magt1         | 1.021141557 | 1.01619192 | 1.35608774 | 1.3495146 |
| A_66_P1043 | 2180.2   | Detected   | 1552.4   | Detected | 2338     | Detected   | 2226.2   | Detected   | Pdcl          | 1.021098982 | 1.07237868 | 1.43403762 | 1.5060551 |
| A_55_P2108 | 2858.6   | Detected   | 2337.5   | Detected | 2965.4   | Detected   | 2918.8   | Detected   | Nck1          | 1.02105926  | 1.03736095 | 1.24868449 | 1.2686203 |
| A_55_P2075 | 109.3    | Detected   | 134.4    | Detected | 93.7     | Detected   | 111.6    | Detected   | Anapc7        | 1.021043001 | 0.85727356 | 0.83035714 | 0.6971726 |
| A_55_P2004 | 4941.4   | Detected   | 3671.3   | Detected | 4614.7   | Detected   | 5044.5   | Detected   | Fbxl15        | 1.020864532 | 0.93388513 | 1.37403644 | 1.2569662 |
| A_55_P1972 | 15621.1  | Detected   | 17463.7  | Detected | 14999.4  | Detected   | 15945.9  | Detected   | Mcrs1         | 1.02079239  | 0.96020127 | 0.91308829 | 0.8588902 |
| A_55_P2182 | 192.7    | Detected   | 141      | Detected | 163.6    | Detected   | 196.7    | Detected   | Esrp1         | 1.020757654 | 0.84898806 | 1.39503546 | 1.1602837 |
| A_52_P1682 | 1265.5   | Detected   | 1440.7   | Detected | 1277.8   | Detected   | 1291.7   | Detected   | Spg20         | 1.020703279 | 1.00971948 | 0.89657805 | 0.88693   |
| A_55_P2070 | 99113.6  | Detected   | 88361.3  | Detected | 80089.7  | Detected   | 101163.6 | Detected   | Csf3r         | 1.020683337 | 0.80805964 | 1.14488583 | 0.9063889 |
| A_55_P2008 | 9.7      | Not Detect | 19       | Detected | 12.1     | Not Detect | 9.9      | Not Detect | Coq9          | 1.020618557 | 1.24742268 | 0.52105263 | 0.6368421 |
| A_55_P1986 | 524.5    | Detected   | 548.7    | Detected | 373.8    | Detected   | 535.3    | Detected   | Pcnx          | 1.020591039 | 0.71267874 | 0.97557864 | 0.6812466 |
| A_55_P1996 | 20135    | Detected   | 7602.8   | Detected | 11791.5  | Detected   | 20549.6  | Detected   | Abcg2         | 1.020591011 | 0.58562205 | 2.70289893 | 1.5509418 |
| A_52_P6653 | 16590    | Detected   | 13470.6  | Detected | 16535.7  | Detected   | 16931.5  | Detected   | Ube2m         | 1.02058469  | 0.99672694 | 1.25692248 | 1.22754   |
| A_55_P1994 | 5559.7   | Detected   | 5304.2   | Detected | 3951.4   | Detected   | 5673.4   | Detected   | Prrc2c        | 1.020450744 | 0.7107218  | 1.06960522 | 0.7449568 |
| A_65_P2010 | 936      | Detected   | 306.9    | Detected | 745.7    | Detected   | 955.1    | Detected   | Mical2        | 1.020405983 | 0.79668803 | 3.11208863 | 2.4297817 |
| A_55_P1959 | 372.8    | Detected   | 279.1    | Detected | 270.3    | Detected   | 380.4    | Detected   | Ren2          | 1.020386266 | 0.72505365 | 1.36295235 | 0.9684701 |
| A_66_P1073 | 44.4     | Detected   | 34.9     | Detected | 701.6    | Compromis  | 45.3     | Not Detect | Olf955        | 1.02027027  | 15.8018018 | 1.29799427 | 20.103152 |
| A_55_P2078 | 100881.2 | Detected   | 100087   | Detected | 104745.1 | Detected   | 102921.3 | Detected   | Kpna2         | 1.020222797 | 1.03830149 | 1.02831836 | 1.0465405 |
| A_55_P2099 | 3758.9   | Detected   | 3117.6   | Detected | 3256.9   | Detected   | 3834.7   | Detected   | Ift80         | 1.020165474 | 0.86645029 | 1.23001668 | 1.0446818 |
| A_51_P4440 | 1330.6   | Detected   | 1210.4   | Detected | 1057.7   | Detected   | 1357.4   | Detected   | Tubgcp6       | 1.02014129  | 0.79490455 | 1.12144746 | 0.8738434 |
| A_55_P1977 | 19.9     | Detected   | 21.4     | Detected | 13.5     | Not Detect | 20.3     | Not Detect | Znrf4         | 1.020100503 | 0.67839196 | 0.94859813 | 0.6308411 |
| A_52_P1529 | 2136.7   | Detected   | 1643.9   | Detected | 2051.5   | Detected   | 2179.6   | Detected   | Leng1         | 1.02007769  | 0.96012543 | 1.3258714  | 1.247947  |
| A_51_P1429 | 1504.9   | Detected   | 2336.6   | Detected | 2531.6   | Detected   | 1535     | Detected   | Chka          | 1.020001329 | 1.68223802 | 0.65693743 | 1.0834546 |
| A_52_P6540 | 28074.7  | Detected   | 28772.4  | Detected | 26321.6  | Detected   | 28635.6  | Detected   | Msto1         | 1.019978842 | 0.93755588 | 0.99524544 | 0.9148211 |
| A_55_P2110 | 319818.1 | Detected   | 267101.9 | Detected | 344243.1 | Detected   | 326205.6 | Detected   | Anxa2         | 1.01997229  | 1.07637154 | 1.22127772 | 1.2888081 |
| A_55_P1959 | 2038.8   | Detected   | 2318.6   | Detected | 1904.5   | Detected   | 2079.5   | Detected   | AI118078      | 1.019962723 | 0.93412792 | 0.89687743 | 0.8214008 |
| A_55_P1972 | 18768.7  | Detected   | 18460.8  | Detected | 15717.5  | Detected   | 19142.9  | Detected   | Wnk1          | 1.019937449 | 0.83743147 | 1.03694856 | 0.8513986 |
| A_52_P2414 | 4911.1   | Detected   | 5144.2   | Detected | 6379.3   | Detected   | 5008.6   | Detected   | Rcl1          | 1.019852986 | 1.29895543 | 0.97364022 | 1.2400956 |

|            |          |            |          |            |          |            |          |            |                |             |            |            |           |
|------------|----------|------------|----------|------------|----------|------------|----------|------------|----------------|-------------|------------|------------|-----------|
| A_66_P1110 | 95.8     | Detected   | 84.2     | Detected   | 114.9    | Detected   | 97.7     | Detected   | Susd1          | 1.019832985 | 1.1993737  | 1.16033254 | 1.3646081 |
| A_51_P1490 | 30.3     | Detected   | 31.8     | Detected   | 26.3     | Detected   | 30.9     | Not Detect | Nkx2-6         | 1.01980198  | 0.8679868  | 0.97169811 | 0.827044  |
| A_55_P2015 | 1364     | Detected   | 1577.8   | Detected   | 1327.2   | Detected   | 1391     | Detected   | 9930111J21Rik1 | 1.019794721 | 0.97302053 | 0.8816073  | 0.8411713 |
| A_52_P7223 | 109470.7 | Detected   | 115490.2 | Detected   | 69638.1  | Detected   | 111636.4 | Detected   | Actg1          | 1.019783376 | 0.6361346  | 0.96663093 | 0.6029784 |
| A_51_P2159 | 3540.3   | Detected   | 3127.5   | Detected   | 2910     | Detected   | 3610.3   | Detected   | Casp6          | 1.019772336 | 0.82196424 | 1.1543725  | 0.9304556 |
| A_55_P2080 | 14126.6  | Detected   | 16215.3  | Detected   | 16489.7  | Detected   | 14405.8  | Detected   | Slirp          | 1.019764133 | 1.16728017 | 0.88840786 | 1.0169223 |
| A_55_P1989 | 390.9    | Detected   | 430.7    | Detected   | 409.5    | Detected   | 398.6    | Detected   | LOC101056633   | 1.019698133 | 1.0475825  | 0.92547016 | 0.9507778 |
| A_52_P5517 | 2798.4   | Detected   | 2265.6   | Detected   | 2252.1   | Detected   | 2853.5   | Detected   | Aff4           | 1.019689823 | 0.8047813  | 1.25948976 | 0.9940413 |
| A_52_P1004 | 244      | Detected   | 200.7    | Detected   | 136.4    | Detected   | 248.8    | Detected   | BC065397       | 1.019672131 | 0.55901639 | 1.23966119 | 0.6796213 |
| A_66_P1034 | 875.9    | Detected   | 872.3    | Detected   | 805.5    | Detected   | 893.1    | Detected   | AU019823       | 1.019636945 | 0.91962553 | 1.02384501 | 0.9234208 |
| A_55_P2091 | 94462    | Detected   | 95651.4  | Detected   | 98679.2  | Detected   | 96316.1  | Detected   | Kpna2          | 1.019627999 | 1.04464441 | 1.00694919 | 1.0316545 |
| A_55_P2050 | 117.7    | Detected   | 127.5    | Detected   | 195.7    | Detected   | 120      | Detected   | Gpam           | 1.019541206 | 1.66270178 | 0.94117647 | 1.534902  |
| A_51_P2553 | 4594     | Detected   | 4785.2   | Detected   | 4359.3   | Detected   | 4683.7   | Detected   | Med31          | 1.019525468 | 0.94891162 | 0.97878877 | 0.9109964 |
| A_55_P2052 | 14792.6  | Detected   | 15514.2  | Detected   | 10610.9  | Detected   | 15080    | Detected   | Mast2          | 1.019428633 | 0.71731136 | 0.97201274 | 0.6839476 |
| A_55_P2009 | 793.1    | Detected   | 692.7    | Detected   | 618.1    | Detected   | 808.5    | Detected   | Cd300lg        | 1.019417476 | 0.77934687 | 1.16717194 | 0.8923055 |
| A_52_P4078 | 13829.9  | Detected   | 12940.7  | Detected   | 13453.5  | Detected   | 14098.2  | Detected   | Lsm12          | 1.019399996 | 0.97278361 | 1.08944648 | 1.0396269 |
| A_55_P2032 | 160.3    | Detected   | 147.1    | Detected   | 170.4    | Detected   | 163.4    | Detected   | Slc6a20a       | 1.01933874  | 1.06300686 | 1.11080897 | 1.1583956 |
| A_55_P2176 | 1955.2   | Detected   | 1713.1   | Detected   | 1775.1   | Detected   | 1993     | Detected   | Zcchc9         | 1.019333061 | 0.90788666 | 1.16338801 | 1.0361917 |
| A_55_P1990 | 139149.2 | Detected   | 142787.7 | Detected   | 180436.1 | Detected   | 141833.1 | Detected   | Snrpg          | 1.01928793  | 1.29670958 | 0.99331455 | 1.263667  |
| A_51_P2250 | 50000.1  | Detected   | 49018.1  | Detected   | 53527.7  | Detected   | 50962.8  | Detected   | Snx17          | 1.019253961 | 1.07055186 | 1.0396731  | 1.0919987 |
| A_55_P1963 | 9637.4   | Detected   | 10655.3  | Detected   | 11184.3  | Detected   | 9821.6   | Detected   | Lias           | 1.019113039 | 1.1605101  | 0.92175725 | 1.0496467 |
| A_55_P2420 | 320.6    | Detected   | 282.4    | Detected   | 581      | Detected   | 326.7    | Detected   | 2210416O15Rik  | 1.019026825 | 1.81222707 | 1.15686969 | 2.0573654 |
| A_55_P1974 | 168069   | Detected   | 184074.1 | Detected   | 174711.1 | Detected   | 171260.4 | Detected   | Gm6177         | 1.01898863  | 1.03952008 | 0.93038836 | 0.9491346 |
| A_55_P1979 | 896.3    | Detected   | 778.2    | Detected   | 826.4    | Detected   | 913.3    | Detected   | Tmem65         | 1.018966864 | 0.92201272 | 1.17360576 | 1.0619378 |
| A_55_P2025 | 1661.6   | Detected   | 1392.6   | Detected   | 1560.3   | Detected   | 1693.1   | Detected   | Gm13238        | 1.018957631 | 0.93903467 | 1.21578343 | 1.1204222 |
| A_55_P2008 | 2364.1   | Detected   | 2316.5   | Detected   | 2285.6   | Detected   | 2408.8   | Detected   | Ctr9           | 1.01890783  | 0.96679497 | 1.03984459 | 0.9866609 |
| A_55_P2114 | 635      | Detected   | 625.8    | Detected   | 714      | Detected   | 647      | Detected   | G2e3           | 1.018897638 | 1.12440945 | 1.03387664 | 1.1409396 |
| A_55_P2170 | 2771.3   | Detected   | 2330     | Detected   | 2535.5   | Detected   | 2823.6   | Detected   | Zfp180         | 1.01887201  | 0.91491358 | 1.21184549 | 1.0881974 |
| A_52_P4453 | 4933.5   | Detected   | 5217.5   | Detected   | 4296.4   | Detected   | 5026.6   | Detected   | Clk4           | 1.018870984 | 0.87086247 | 0.9634116  | 0.8234595 |
| A_55_P2009 | 297.4    | Detected   | 241.8    | Detected   | 256.3    | Detected   | 303      | Detected   | Prr9           | 1.018829859 | 0.86180229 | 1.25310174 | 1.0599669 |
| A_55_P1990 | 11324.3  | Detected   | 12834.9  | Detected   | 13133.3  | Detected   | 11537.3  | Detected   | Bin3           | 1.01880911  | 1.15974497 | 0.89890065 | 1.0232491 |
| A_51_P1887 | 3740.9   | Detected   | 1897.3   | Detected   | 3959.7   | Detected   | 3811.1   | Detected   | Arhgef28       | 1.018765538 | 1.0584886  | 2.00869657 | 2.0870184 |
| A_55_P2032 | 112      | Detected   | 117.1    | Detected   | 98.9     | Detected   | 114.1    | Detected   | LOC101056497   | 1.01875     | 0.88303571 | 0.97438087 | 0.8445773 |
| A_55_P2178 | 222600.2 | Detected   | 239906.1 | Detected   | 240633.9 | Detected   | 226765.6 | Detected   | Rpl26          | 1.018712472 | 1.08101385 | 0.94522649 | 1.0030337 |
| A_55_P2001 | 22522.1  | Detected   | 21952.1  | Detected   | 23423.9  | Detected   | 22943.1  | Detected   | Luc7l3         | 1.018692751 | 1.04004067 | 1.04514374 | 1.067046  |
| A_55_P1970 | 10.7     | Not Detect | 21.3     | Detected   | 16.7     | Not Detect | 10.9     | Not Detect | Kdm4d          | 1.018691589 | 1.56074766 | 0.51173709 | 0.7840376 |
| A_55_P2095 | 16.1     | Detected   | 14.2     | Not Detect | 15.1     | Not Detect | 16.4     | Not Detect | Kcnk4          | 1.01863354  | 0.9378882  | 1.15492958 | 1.0633803 |
| A_55_P2115 | 1063.1   | Detected   | 1126.3   | Detected   | 1230.9   | Detected   | 1082.9   | Detected   | Mphosph10      | 1.018624777 | 1.15784028 | 0.96146675 | 1.0928705 |
| A_55_P2013 | 8913.6   | Detected   | 9078.3   | Detected   | 9202.5   | Detected   | 9079.3   | Detected   | Fam58b         | 1.018589571 | 1.03241115 | 1.00011015 | 1.013681  |
| A_51_P4510 | 2845.8   | Detected   | 2203.2   | Detected   | 2525.7   | Detected   | 2898.7   | Detected   | Atp2a2         | 1.018588798 | 0.88751845 | 1.3156772  | 1.146378  |

|            |          |          |          |            |          |            |          |            |            |             |            |            |           |
|------------|----------|----------|----------|------------|----------|------------|----------|------------|------------|-------------|------------|------------|-----------|
| A_52_P6521 | 40772.5  | Detected | 45356.8  | Detected   | 40333.8  | Detected   | 41529.1  | Detected   | Sar1a      | 1.018556625 | 0.9892403  | 0.91560913 | 0.8892559 |
| A_51_P1686 | 25188.8  | Detected | 30087.7  | Detected   | 28648.3  | Detected   | 25655.4  | Detected   | Prim1      | 1.018524106 | 1.13734279 | 0.85268731 | 0.9521599 |
| A_55_P1963 | 14417.5  | Detected | 11172.8  | Detected   | 10692.6  | Detected   | 14683.7  | Detected   | Plekho2    | 1.018463673 | 0.74164037 | 1.31423636 | 0.9570206 |
| A_51_P4946 | 39826    | Detected | 13056.4  | Detected   | 52739.3  | Detected   | 40558.9  | Detected   | Cot1l      | 1.018402551 | 1.32424296 | 3.10643822 | 4.0393447 |
| A_51_P3100 | 116962   | Detected | 129103.3 | Detected   | 123854.2 | Detected   | 119113.8 | Detected   | Naca       | 1.018397428 | 1.05892683 | 0.92262398 | 0.9593419 |
| A_55_P2095 | 581.8    | Detected | 411.3    | Detected   | 552.3    | Detected   | 592.5    | Detected   | Fbrsl1     | 1.0183912   | 0.94929529 | 1.44055434 | 1.3428155 |
| A_55_P1976 | 2079.4   | Detected | 1494.4   | Detected   | 1287.7   | Detected   | 2117.6   | Detected   | Lmtk3      | 1.018370684 | 0.61926517 | 1.41702355 | 0.8616836 |
| A_52_P6338 | 229.8    | Detected | 150.1    | Detected   | 270      | Detected   | 234      | Detected   | Zbtb6      | 1.018276762 | 1.17493473 | 1.55896069 | 1.7988008 |
| A_55_P2114 | 76.6     | Detected | 71       | Detected   | 49       | Detected   | 78       | Detected   | Rab33b     | 1.018276762 | 0.63968668 | 1.09859155 | 0.6901408 |
| A_55_P2083 | 307.8    | Detected | 287      | Detected   | 337.8    | Detected   | 313.4    | Detected   | Mob1b      | 1.018193632 | 1.09746589 | 1.09198606 | 1.1770035 |
| A_51_P5174 | 160986.8 | Detected | 156568.8 | Detected   | 235643.6 | Detected   | 163915   | Detected   | Cox8a      | 1.018189069 | 1.46374485 | 1.04691995 | 1.5050483 |
| A_55_P2082 | 15320.2  | Detected | 13365    | Detected   | 12275.9  | Detected   | 15598.5  | Detected   | Npepps     | 1.018165559 | 0.80128849 | 1.1671156  | 0.918511  |
| A_55_P2011 | 387.9    | Detected | 296.9    | Detected   | 291.3    | Detected   | 394.9    | Detected   | Bcor1l     | 1.018045888 | 0.75096674 | 1.33007747 | 0.9811384 |
| A_51_P3186 | 120333.6 | Detected | 113400.5 | Detected   | 146967.8 | Detected   | 122501.8 | Detected   | Rps3       | 1.018018243 | 1.22133635 | 1.08025802 | 1.2960066 |
| A_51_P4413 | 166.8    | Detected | 111.1    | Detected   | 147.4    | Detected   | 169.8    | Detected   | Kansl1l    | 1.017985612 | 0.88369305 | 1.52835284 | 1.3267327 |
| A_52_P681  | 891.9    | Detected | 832.9    | Detected   | 876.8    | Detected   | 907.9    | Detected   | Cnot4      | 1.017939231 | 0.98306985 | 1.09004682 | 1.0527074 |
| A_55_P2455 | 50.4     | Detected | 37.9     | Detected   | 39.2     | Detected   | 51.3     | Detected   | Pole       | 1.017857143 | 0.77777778 | 1.35356201 | 1.0343008 |
| A_51_P5193 | 949.3    | Detected | 861.2    | Detected   | 916.4    | Detected   | 966.1    | Detected   | Fam83f     | 1.017697251 | 0.96534288 | 1.12180678 | 1.0640966 |
| A_51_P2291 | 68.1     | Detected | 53.8     | Detected   | 55.1     | Detected   | 69.3     | Detected   | Crhr1      | 1.017621145 | 0.80910426 | 1.28810409 | 1.0241636 |
| A_55_P2174 | 415      | Detected | 329.2    | Detected   | 808.5    | Detected   | 422.3    | Detected   | Frat2      | 1.017590361 | 1.94819277 | 1.2828068  | 2.4559538 |
| A_55_P2131 | 51.2     | Detected | 45.5     | Detected   | 55.9     | Detected   | 52.1     | Detected   | Gdf5       | 1.017578125 | 1.09179688 | 1.14505495 | 1.2285714 |
| A_51_P3505 | 79.7     | Detected | 58.8     | Detected   | 49.2     | Detected   | 81.1     | Detected   | Csrp2bp    | 1.017565872 | 0.61731493 | 1.3792517  | 0.8367347 |
| A_51_P4181 | 45.6     | Detected | 46.9     | Detected   | 44.2     | Detected   | 46.4     | Not Detect | Fn3krp     | 1.01754386  | 0.96929825 | 0.98933902 | 0.9424307 |
| A_55_P2084 | 148.3    | Detected | 145.6    | Detected   | 124.2    | Detected   | 150.9    | Detected   | Acaca      | 1.01753203  | 0.83749157 | 1.0364011  | 0.853022  |
| A_55_P2065 | 17.2     | Detected | 17.8     | Not Detect | 11.9     | Not Detect | 17.5     | Not Detect | Krtap9-5   | 1.01744186  | 0.69186047 | 0.98314607 | 0.6685393 |
| A_55_P2080 | 103.4    | Detected | 89.8     | Detected   | 94.5     | Detected   | 105.2    | Detected   | Spata31d1b | 1.017408124 | 0.9139265  | 1.1714922  | 1.0523385 |
| A_52_P9437 | 104585.1 | Detected | 106151   | Detected   | 120187.8 | Detected   | 106404.8 | Detected   | Psmb3      | 1.017399228 | 1.14918664 | 1.00239093 | 1.1322343 |
| A_55_P1995 | 7887.1   | Detected | 6874.6   | Detected   | 7282.5   | Detected   | 8023.5   | Detected   | Thumpd1    | 1.017294062 | 0.92334318 | 1.16712245 | 1.0593344 |
| A_55_P2058 | 139.4    | Detected | 130.7    | Detected   | 99.9     | Detected   | 141.8    | Detected   | Hap1       | 1.017216643 | 0.71664275 | 1.08492731 | 0.7643458 |
| A_55_P2057 | 180.4    | Detected | 184.7    | Detected   | 300.9    | Detected   | 183.5    | Detected   | Arl4d      | 1.017184035 | 1.66796009 | 0.99350298 | 1.6291283 |
| A_51_P4723 | 9084.2   | Detected | 5720.9   | Detected   | 8181     | Detected   | 9239.7   | Detected   | Fbxo18     | 1.017117633 | 0.90057462 | 1.61507805 | 1.4300198 |
| A_51_P2273 | 14444.6  | Detected | 12008.2  | Detected   | 12104.1  | Detected   | 14691.8  | Detected   | Rhou       | 1.017113662 | 0.83796713 | 1.22348062 | 1.0079862 |
| A_51_P2899 | 6912.3   | Detected | 7300.5   | Detected   | 7873.3   | Detected   | 7029.8   | Detected   | Psmg3      | 1.016998684 | 1.13902753 | 0.96292035 | 1.0784604 |
| A_55_P2143 | 21604.3  | Detected | 16909.7  | Detected   | 36612.5  | Detected   | 21971    | Detected   | Rpp21      | 1.016973473 | 1.69468578 | 1.29931341 | 2.1651774 |
| A_51_P2442 | 401.3    | Detected | 371      | Detected   | 391.2    | Detected   | 408.1    | Detected   | Hapln3     | 1.016944929 | 0.9748318  | 1.1        | 1.0544474 |
| A_55_P2127 | 307.4    | Detected | 321.1    | Detected   | 332.5    | Detected   | 312.6    | Detected   | Zfp36l3    | 1.01691607  | 1.08165257 | 0.9735285  | 1.035503  |
| A_55_P2054 | 6493     | Detected | 8040.3   | Detected   | 8635.2   | Detected   | 6602.4   | Detected   | M6pr       | 1.016848914 | 1.32992453 | 0.82116339 | 1.0739898 |
| A_52_P3123 | 4202.6   | Detected | 6211.1   | Detected   | 5321.6   | Detected   | 4273.4   | Detected   | Ssr3       | 1.016846714 | 1.26626374 | 0.68802628 | 0.8567887 |
| A_55_P2025 | 166.6    | Detected | 171.9    | Detected   | 232.9    | Detected   | 169.4    | Detected   | Hvcn1      | 1.016806723 | 1.39795918 | 0.98545666 | 1.3548575 |
| A_52_P3749 | 5795.3   | Detected | 4896.6   | Detected   | 5914.3   | Detected   | 5892.6   | Detected   | Dpcd       | 1.016789467 | 1.02053388 | 1.20340645 | 1.2078381 |



|            |          |          |          |            |          |            |          |            |            |             |            |            |           |
|------------|----------|----------|----------|------------|----------|------------|----------|------------|------------|-------------|------------|------------|-----------|
| A_51_P1222 | 54935.3  | Detected | 57385    | Detected   | 56840.6  | Detected   | 55857.5  | Detected   | CrelD2     | 1.01678702  | 1.03468262 | 0.97338155 | 0.9905132 |
| A_66_P1144 | 935.9    | Detected | 754.5    | Detected   | 837.5    | Detected   | 951.6    | Detected   | Vps39      | 1.016775297 | 0.89486056 | 1.2612326  | 1.1100066 |
| A_55_P2039 | 7157.2   | Detected | 5558.1   | Detected   | 6550.8   | Detected   | 7277.2   | Detected   | Gigyf2     | 1.016766333 | 0.91527413 | 1.30929634 | 1.1786042 |
| A_52_P4907 | 608.5    | Detected | 492      | Detected   | 720      | Detected   | 618.7    | Detected   | Zfp26      | 1.016762531 | 1.18323747 | 1.25752033 | 1.4634146 |
| A_55_P2002 | 579      | Detected | 699.7    | Detected   | 684.2    | Detected   | 588.7    | Detected   | Aifm2      | 1.016753022 | 1.18169257 | 0.84136058 | 0.9778476 |
| A_55_P2137 | 993.3    | Detected | 894.8    | Detected   | 778.8    | Detected   | 1009.9   | Detected   | Rad50      | 1.016711197 | 0.78405316 | 1.1286321  | 0.8703621 |
| A_51_P4833 | 6561.8   | Detected | 7852.3   | Detected   | 6944.6   | Detected   | 6671.2   | Detected   | Sdad1      | 1.016672255 | 1.05833765 | 0.84958547 | 0.8844033 |
| A_51_P4919 | 5623.6   | Detected | 4671.1   | Detected   | 3847.5   | Detected   | 5717.3   | Detected   | Fbxw17     | 1.016661925 | 0.68417028 | 1.22397294 | 0.8236818 |
| A_55_P2015 | 54550.8  | Detected | 23839.9  | Detected   | 53389.3  | Detected   | 55459.7  | Detected   | Itga6      | 1.016661534 | 0.97870792 | 2.32633946 | 2.2394935 |
| A_55_P2118 | 1188.9   | Detected | 1219.2   | Detected   | 1038.2   | Detected   | 1208.7   | Detected   | St6galnac1 | 1.01665405  | 0.87324418 | 0.9913878  | 0.851542  |
| A_55_P2073 | 588.5    | Detected | 522.6    | Detected   | 471.4    | Detected   | 598.3    | Detected   | Gpatch8    | 1.016652506 | 0.80101954 | 1.14485266 | 0.9020283 |
| A_55_P1990 | 546.5    | Detected | 436.4    | Detected   | 443.2    | Detected   | 555.6    | Detected   | Ncapg      | 1.016651418 | 0.81097896 | 1.2731439  | 1.015582  |
| A_51_P3428 | 103668.6 | Detected | 81180.6  | Detected   | 90735.7  | Detected   | 105394.1 | Detected   | S100a10    | 1.016644384 | 0.87524766 | 1.29826707 | 1.1177018 |
| A_55_P1966 | 1711.9   | Detected | 1621.5   | Detected   | 3047     | Detected   | 1740.3   | Detected   | LOC547349  | 1.016589754 | 1.77989369 | 1.07326549 | 1.8791243 |
| A_55_P2000 | 266      | Detected | 179.7    | Detected   | 192      | Detected   | 270.4    | Detected   | Kif7       | 1.016541353 | 0.72180451 | 1.50473011 | 1.0684474 |
| A_55_P2158 | 121.1    | Detected | 132.8    | Detected   | 90.2     | Detected   | 123.1    | Detected   | Krtap4-16  | 1.016515277 | 0.74483898 | 0.92695783 | 0.6792169 |
| A_51_P4833 | 997.5    | Detected | 801.4    | Detected   | 856.8    | Detected   | 1013.9   | Detected   | Lix1l      | 1.016441103 | 0.85894737 | 1.26516097 | 1.069129  |
| A_55_P2138 | 22721.4  | Detected | 21945.3  | Detected   | 27023.3  | Detected   | 23094.8  | Detected   | Fdx1       | 1.016433847 | 1.18933252 | 1.05238024 | 1.2313935 |
| A_55_P2107 | 13677.3  | Detected | 11253.7  | Detected   | 12970.2  | Detected   | 13901.7  | Detected   | Mcmbp      | 1.016406747 | 0.9483012  | 1.23530039 | 1.1525276 |
| A_55_P2122 | 18.3     | Detected | 9.6      | Not Detect | 10.6     | Not Detect | 18.6     | Not Detect | Ptcra      | 1.016393443 | 0.57923497 | 1.9375     | 1.1041667 |
| A_55_P1962 | 27059.1  | Detected | 22424.8  | Detected   | 37465.9  | Detected   | 27501.2  | Detected   | Bad        | 1.016338311 | 1.3845952  | 1.22637437 | 1.6707351 |
| A_51_P4799 | 2035.6   | Detected | 2755     | Detected   | 1674     | Detected   | 2068.8   | Detected   | Pik3cb     | 1.016309688 | 0.82236196 | 0.75092559 | 0.6076225 |
| A_55_P1963 | 351005.3 | Detected | 333837.3 | Detected   | 368499.3 | Detected   | 356719.2 | Detected   | Rps16      | 1.016278672 | 1.0498397  | 1.06854207 | 1.103829  |
| A_55_P2100 | 435926.3 | Detected | 430833.8 | Detected   | 400397.8 | Detected   | 443005.1 | Detected   | Rn18s      | 1.016238525 | 0.91849884 | 1.02825057 | 0.9293556 |
| A_55_P2180 | 104.9    | Detected | 97.2     | Detected   | 83.5     | Detected   | 106.6    | Detected   | Gm8273     | 1.01620591  | 0.79599619 | 1.09670782 | 0.8590535 |
| A_52_P6584 | 6606.1   | Detected | 6797.5   | Detected   | 6008.9   | Detected   | 6712.8   | Detected   | Esp1l      | 1.016151739 | 0.9095987  | 0.98753954 | 0.8839868 |
| A_51_P3017 | 21726.3  | Detected | 23062.2  | Detected   | 26054.2  | Detected   | 22076.3  | Detected   | Ppp2r2a    | 1.016109508 | 1.19920097 | 0.95725039 | 1.1297361 |
| A_55_P1987 | 30047.9  | Detected | 36937.3  | Detected   | 31096.6  | Detected   | 30530.8  | Detected   | Plrg1      | 1.016071007 | 1.03490094 | 0.82655744 | 0.8418753 |
| A_55_P1994 | 685.4    | Detected | 675.4    | Detected   | 349.2    | Detected   | 696.4    | Detected   | Khdrbs1    | 1.016049022 | 0.50948351 | 1.03109269 | 0.5170269 |
| A_55_P2023 | 330.4    | Detected | 275.9    | Detected   | 356.2    | Detected   | 335.7    | Detected   | Il20rb     | 1.016041162 | 1.07808717 | 1.2167452  | 1.2910475 |
| A_55_P1982 | 162.6    | Detected | 254      | Detected   | 168.1    | Detected   | 165.2    | Detected   | Gm20767    | 1.01599016  | 1.03382534 | 0.6503937  | 0.661811  |
| A_52_P4510 | 3250.3   | Detected | 2170     | Detected   | 3224.3   | Detected   | 3302.2   | Detected   | Tnfrsf21   | 1.015967757 | 0.99200074 | 1.52175115 | 1.4858525 |
| A_55_P1963 | 296204.3 | Detected | 280612   | Detected   | 311213.9 | Detected   | 300929.5 | Detected   | Rps16      | 1.015952503 | 1.05067313 | 1.07240425 | 1.1090541 |
| A_66_P1369 | 15276.7  | Detected | 11986.9  | Detected   | 18599.1  | Detected   | 15519.8  | Detected   | Tmem43     | 1.015913123 | 1.21748152 | 1.29473008 | 1.5516189 |
| A_55_P2060 | 139.6    | Detected | 136.5    | Detected   | 141.1    | Detected   | 141.8    | Detected   | Krt9       | 1.015759312 | 1.01074499 | 1.03882784 | 1.0336996 |
| A_55_P1987 | 2450.1   | Detected | 2192.7   | Detected   | 2093.1   | Detected   | 2488.4   | Detected   | Ap5z1      | 1.015632015 | 0.85429166 | 1.13485657 | 0.9545765 |
| A_55_P2029 | 340785.8 | Detected | 311990.1 | Detected   | 324273.7 | Detected   | 346099.1 | Detected   | Rpl23      | 1.015591319 | 0.95154698 | 1.10932719 | 1.0393718 |
| A_65_P2037 | 5339.1   | Detected | 5495.7   | Detected   | 5994.7   | Detected   | 5422.1   | Detected   | Bclaf1     | 1.015545691 | 1.12279223 | 0.98660771 | 1.0907983 |
| A_55_P2046 | 32.2     | Detected | 28.4     | Detected   | 33.2     | Detected   | 32.7     | Not Detect | Gm10693    | 1.01552795  | 1.0310559  | 1.15140845 | 1.1690141 |
| A_55_P2148 | 45.1     | Detected | 47.7     | Detected   | 31.4     | Detected   | 45.8     | Not Detect | Gm14762    | 1.015521064 | 0.6962306  | 0.96016771 | 0.6582809 |

|            |          |          |          |            |          |          |          |            |               |             |            |            |           |
|------------|----------|----------|----------|------------|----------|----------|----------|------------|---------------|-------------|------------|------------|-----------|
| A_51_P4872 | 11129.3  | Detected | 9144.4   | Detected   | 12675.9  | Detected | 11301.1  | Detected   | Yipf3         | 1.01543673  | 1.13896651 | 1.23584926 | 1.3861926 |
| A_55_P2095 | 1472.7   | Detected | 1259.9   | Detected   | 1429.2   | Detected | 1495.4   | Detected   | Zranb1        | 1.015413866 | 0.97046242 | 1.1869196  | 1.1343757 |
| A_55_P2124 | 4353.8   | Detected | 3714.1   | Detected   | 5168.2   | Detected | 4420.6   | Detected   | Gnptg         | 1.015342919 | 1.18705499 | 1.19022105 | 1.391508  |
| A_55_P2252 | 182.8    | Detected | 253.9    | Detected   | 139.7    | Detected | 185.6    | Detected   | Olfrl372-ps1  | 1.015317287 | 0.76422319 | 0.73099646 | 0.5502166 |
| A_52_P4501 | 275      | Detected | 199.8    | Detected   | 464      | Detected | 279.2    | Detected   | Ranbp6        | 1.015272727 | 1.68727273 | 1.3973974  | 2.3223223 |
| A_51_P1101 | 340.9    | Detected | 310.1    | Detected   | 297.7    | Detected | 346.1    | Detected   | Vmn1r25       | 1.01525374  | 0.87327662 | 1.11609158 | 0.9600129 |
| A_55_P1967 | 712.2    | Detected | 907.6    | Detected   | 729.2    | Detected | 723      | Detected   | Srfbp1        | 1.01516428  | 1.0238697  | 0.79660643 | 0.8034376 |
| A_51_P5116 | 26.4     | Detected | 17.4     | Not Detect | 25.2     | Detected | 26.8     | Not Detect | Mtag2         | 1.015151515 | 0.95454545 | 1.54022989 | 1.4482759 |
| A_52_P4561 | 3050.1   | Detected | 2629.1   | Detected   | 3584.8   | Detected | 3096.3   | Detected   | Dgat1         | 1.015147044 | 1.17530573 | 1.1777034  | 1.3635084 |
| A_55_P2146 | 243496.8 | Detected | 237964.7 | Detected   | 276697.8 | Detected | 247149.4 | Detected   | Rps13         | 1.015000608 | 1.13635087 | 1.0385969  | 1.1627683 |
| A_66_P1358 | 12187.2  | Detected | 11399.9  | Detected   | 9899.1   | Detected | 12369.1  | Detected   | Fip111        | 1.014925496 | 0.81225384 | 1.08501829 | 0.8683497 |
| A_52_P3238 | 1522.7   | Detected | 1284.2   | Detected   | 1453.7   | Detected | 1545.4   | Detected   | Zfp830        | 1.01490773  | 0.95468576 | 1.20339511 | 1.1319888 |
| A_55_P2081 | 263.3    | Detected | 262.5    | Detected   | 233      | Detected | 267.2    | Detected   | Cox7c         | 1.014812002 | 0.88492214 | 1.01790476 | 0.887619  |
| A_51_P5119 | 4821.5   | Detected | 6809.2   | Detected   | 2720.1   | Detected | 4892.4   | Detected   | Setd7         | 1.014704967 | 0.56416053 | 0.7184985  | 0.3994742 |
| A_51_P3108 | 408.1    | Detected | 533.9    | Detected   | 358.3    | Detected | 414.1    | Detected   | Hoxa5         | 1.014702279 | 0.87797109 | 0.77561341 | 0.6710995 |
| A_52_P2349 | 55229.4  | Detected | 50729.7  | Detected   | 53799.5  | Detected | 56038.3  | Detected   | Gm15032       | 1.014646185 | 0.9741098  | 1.10464481 | 1.0605129 |
| A_55_P2046 | 98671.6  | Detected | 97365.9  | Detected   | 87311.6  | Detected | 100115.9 | Detected   | Phgdh         | 1.014637444 | 0.88487062 | 1.02824397 | 0.8967369 |
| A_55_P1968 | 432384.2 | Detected | 384808.1 | Detected   | 426294.9 | Detected | 438695.6 | Detected   | Ftl1          | 1.014596741 | 0.98591692 | 1.14003733 | 1.1078117 |
| A_55_P2069 | 145.2    | Detected | 115      | Detected   | 120.7    | Detected | 147.3    | Detected   | Zfp316        | 1.01446281  | 0.83126722 | 1.28086957 | 1.0495652 |
| A_55_P2186 | 5359.8   | Detected | 4857.2   | Detected   | 4497     | Detected | 5436.6   | Detected   | R3hdm2        | 1.014328893 | 0.83902384 | 1.11928683 | 0.925842  |
| A_51_P2062 | 4688.6   | Detected | 5637.5   | Detected   | 5878.6   | Detected | 4755.6   | Detected   | Seh1l         | 1.01428998  | 1.25380711 | 0.84356541 | 1.0427672 |
| A_55_P2174 | 33176.9  | Detected | 25320.3  | Detected   | 42126    | Detected | 33650.3  | Detected   | Mrpl43        | 1.014268964 | 1.26973888 | 1.32898504 | 1.6637244 |
| A_51_P3366 | 11960.6  | Detected | 12628.9  | Detected   | 10298    | Detected | 12131.2  | Detected   | Xpo1          | 1.014263498 | 0.8609936  | 0.96059039 | 0.8154313 |
| A_55_P2069 | 355931.1 | Detected | 375738.4 | Detected   | 377802.1 | Detected | 360995.7 | Detected   | Rps12l2       | 1.014229158 | 1.06144729 | 0.96076339 | 1.0054924 |
| A_52_P2996 | 63.3     | Detected | 41.7     | Detected   | 59.4     | Detected | 64.2     | Detected   | Cep110        | 1.014218009 | 0.93838863 | 1.53956835 | 1.4244604 |
| A_66_P1166 | 21.2     | Detected | 19.4     | Detected   | 17.7     | Detected | 21.5     | Not Detect | D630010B17Rik | 1.014150943 | 0.83490566 | 1.10824742 | 0.9123711 |
| A_55_P2130 | 565.4    | Detected | 517.5    | Detected   | 508.3    | Detected | 573.4    | Detected   | Rhox8         | 1.014149275 | 0.89900955 | 1.10801932 | 0.9822222 |
| A_52_P5087 | 327.5    | Detected | 313.7    | Detected   | 163.1    | Detected | 332.1    | Detected   | Zfp951        | 1.014045802 | 0.49801527 | 1.05865477 | 0.5199235 |
| A_55_P1978 | 13741.8  | Detected | 15173.6  | Detected   | 14533.8  | Detected | 13934.6  | Detected   | Rpgrip1       | 1.014030185 | 1.05763437 | 0.91834502 | 0.9578347 |
| A_51_P2150 | 1939.8   | Detected | 1918.2   | Detected   | 1796.1   | Detected | 1967     | Detected   | Klf16         | 1.014022064 | 0.9259202  | 1.02544052 | 0.9363466 |
| A_55_P2087 | 163357.5 | Detected | 164428.5 | Detected   | 188116.3 | Detected | 165645.8 | Detected   | Rps11         | 1.014007927 | 1.15156206 | 1.00740322 | 1.1440614 |
| A_55_P2454 | 1550.2   | Detected | 977.3    | Detected   | 1305.7   | Detected | 1571.9   | Detected   | Mgea5         | 1.013998194 | 0.84227842 | 1.60841093 | 1.3360278 |
| A_55_P1955 | 322283.3 | Detected | 320218.8 | Detected   | 331594.3 | Detected | 326781.4 | Detected   | Rpl38         | 1.013956975 | 1.02889073 | 1.02049411 | 1.0355241 |
| A_51_P1443 | 6020.7   | Detected | 4599.4   | Detected   | 5330.1   | Detected | 6104.6   | Detected   | Efna5         | 1.013935257 | 0.88529573 | 1.32726008 | 1.1588685 |
| A_55_P2349 | 775.3    | Detected | 620      | Detected   | 828.2    | Detected | 786.1    | Detected   | Ptk2          | 1.013930092 | 1.06823165 | 1.26790323 | 1.3358065 |
| A_55_P2422 | 4340.1   | Detected | 3768.8   | Detected   | 4576     | Detected | 4400.2   | Detected   | 2900072G11Rik | 1.013847607 | 1.05435359 | 1.16753343 | 1.2141796 |
| A_55_P2001 | 27917.9  | Detected | 33672.3  | Detected   | 33773.5  | Detected | 28304.2  | Detected   | Fcf1          | 1.013837001 | 1.20974357 | 0.84057816 | 1.0030054 |
| A_55_P2114 | 7178.7   | Detected | 8050.3   | Detected   | 9337.8   | Detected | 7278     | Detected   | Zfp191        | 1.013832588 | 1.30076476 | 0.90406569 | 1.1599319 |
| A_52_P5675 | 123.1    | Detected | 16.4     | Not Detect | 367.4    | Detected | 124.8    | Detected   | Lcp1          | 1.013809911 | 2.98456539 | 7.6097561  | 22.402439 |
| A_52_P1453 | 980.4    | Detected | 692.3    | Detected   | 913.7    | Detected | 993.9    | Detected   | Stradb        | 1.01376989  | 0.93196654 | 1.43564928 | 1.3198036 |

|            |          |          |          |            |          |            |          |            |               |             |            |            |           |
|------------|----------|----------|----------|------------|----------|------------|----------|------------|---------------|-------------|------------|------------|-----------|
| A_51_P4614 | 7542.8   | Detected | 6640.9   | Detected   | 5874.2   | Detected   | 7645.9   | Detected   | Atn1          | 1.013668664 | 0.77878242 | 1.15133491 | 0.8845488 |
| A_55_P2088 | 8079.5   | Detected | 6752.5   | Detected   | 6194.4   | Detected   | 8189.4   | Detected   | Htt           | 1.013602327 | 0.76668111 | 1.21279526 | 0.9173491 |
| A_55_P2085 | 200.1    | Detected | 165.4    | Detected   | 165.1    | Detected   | 202.8    | Detected   | Abhd12b       | 1.013493253 | 0.82508746 | 1.2261185  | 0.9981862 |
| A_55_P2157 | 22.3     | Detected | 31.4     | Detected   | 27.4     | Detected   | 22.6     | Not Detect | Map1a         | 1.013452915 | 1.22869955 | 0.71974522 | 0.8726115 |
| A_55_P2302 | 22.4     | Detected | 17.8     | Detected   | 27.3     | Detected   | 22.7     | Not Detect | 9430065F17Rik | 1.013392857 | 1.21875    | 1.2752809  | 1.5337079 |
| A_52_P4085 | 6640.2   | Detected | 6678.5   | Detected   | 4511.5   | Detected   | 6728.9   | Detected   | St3gal2       | 1.013358031 | 0.67942231 | 1.0075466  | 0.6755259 |
| A_55_P2144 | 22416.9  | Detected | 23804.3  | Detected   | 26615    | Detected   | 22715.3  | Detected   | Snx5          | 1.013311386 | 1.18727389 | 0.95425196 | 1.1180753 |
| A_55_P2158 | 13640.5  | Detected | 14089.8  | Detected   | 15325.3  | Detected   | 13821.7  | Detected   | Nme6          | 1.013283971 | 1.12351453 | 0.98097205 | 1.0876875 |
| A_52_P2630 | 158.3    | Detected | 152      | Detected   | 167.6    | Detected   | 160.4    | Detected   | Lancl2        | 1.013265951 | 1.05874921 | 1.05526316 | 1.1026316 |
| A_55_P1975 | 5038.6   | Detected | 4186.6   | Detected   | 4766.8   | Detected   | 5105.2   | Detected   | Snx18         | 1.013217957 | 0.94605644 | 1.21941432 | 1.138585  |
| A_55_P2011 | 12142.5  | Detected | 10189    | Detected   | 15284.3  | Detected   | 12302.8  | Detected   | Gnptg         | 1.013201565 | 1.25874408 | 1.20745902 | 1.5000785 |
| A_55_P2143 | 28875.2  | Detected | 20858.5  | Detected   | 15376.4  | Detected   | 29250.7  | Detected   | Sema3c        | 1.013004239 | 0.53251233 | 1.40233957 | 0.7371767 |
| A_55_P2061 | 69.3     | Detected | 65.7     | Detected   | 125.8    | Detected   | 70.2     | Detected   | 6430550D23Rik | 1.012987013 | 1.81529582 | 1.06849315 | 1.9147641 |
| A_55_P1959 | 986.8    | Detected | 1081.1   | Detected   | 805.8    | Detected   | 999.6    | Detected   | Dcaf12l2      | 1.01297122  | 0.81657884 | 0.92461382 | 0.745352  |
| A_55_P2039 | 224.3    | Detected | 283.2    | Detected   | 255.2    | Detected   | 227.2    | Detected   | Gm5088        | 1.012929113 | 1.13776193 | 0.80225989 | 0.9011299 |
| A_51_P3330 | 14660.6  | Detected | 15026.6  | Detected   | 14623.2  | Detected   | 14849.9  | Detected   | Mrps15        | 1.012912159 | 0.99744894 | 0.98824085 | 0.9731543 |
| A_55_P1960 | 5626     | Detected | 5921.4   | Detected   | 5138     | Detected   | 5698.5   | Detected   | Mbd3          | 1.012886598 | 0.91325986 | 0.96235688 | 0.8677002 |
| A_55_P2026 | 12977.6  | Detected | 13685.5  | Detected   | 11877.6  | Detected   | 13144.3  | Detected   | Smarce1       | 1.01284521  | 0.91523856 | 0.9604545  | 0.8678967 |
| A_55_P2034 | 10114.4  | Detected | 6240.8   | Detected   | 8953.5   | Detected   | 10244.3  | Detected   | Lrrc8d        | 1.012843075 | 0.88522305 | 1.64150429 | 1.4346718 |
| A_55_P2057 | 100026.2 | Detected | 103762.1 | Detected   | 119608.9 | Detected   | 101309.1 | Detected   | Rpl17         | 1.01282564  | 1.19577571 | 0.97635938 | 1.1527224 |
| A_65_P0703 | 382.6    | Detected | 446.2    | Detected   | 345.6    | Detected   | 387.5    | Detected   | Ddx20         | 1.012807109 | 0.90329326 | 0.86844464 | 0.7745406 |
| A_51_P1340 | 31.4     | Detected | 25.5     | Detected   | 12.4     | Not Detect | 31.8     | Not Detect | Oas1e         | 1.012738854 | 0.39490446 | 1.24705882 | 0.4862745 |
| A_51_P1011 | 14680.2  | Detected | 16022.4  | Detected   | 17971.6  | Detected   | 14866.5  | Detected   | Psme1         | 1.012690563 | 1.22420675 | 0.92785725 | 1.1216547 |
| A_55_P2025 | 39191.7  | Detected | 39060.7  | Detected   | 38969    | Detected   | 39688.9  | Detected   | Acly          | 1.01268636  | 0.99431767 | 1.01608266 | 0.9976524 |
| A_55_P2164 | 3055.9   | Detected | 2105.5   | Detected   | 3270.1   | Detected   | 3094.6   | Detected   | Gnaq          | 1.012664027 | 1.07009392 | 1.46976965 | 1.5531228 |
| A_51_P3717 | 86.9     | Detected | 87.5     | Detected   | 61       | Detected   | 88       | Detected   | Marco         | 1.012658228 | 0.70195627 | 1.00571429 | 0.6971429 |
| A_55_P2166 | 24       | Detected | 16.4     | Not Detect | 18.2     | Not Detect | 24.3     | Not Detect | Ifna13        | 1.0125      | 0.75833333 | 1.48170732 | 1.1097561 |
| A_55_P2026 | 184      | Detected | 133.3    | Detected   | 136.2    | Detected   | 186.3    | Detected   | Dcaf7         | 1.0125      | 0.74021739 | 1.3975994  | 1.0217554 |
| A_51_P4974 | 8725.1   | Detected | 8109.7   | Detected   | 9463.2   | Detected   | 8834.1   | Detected   | Tonsl         | 1.012492693 | 1.08459502 | 1.08932513 | 1.1668989 |
| A_55_P2149 | 2171.2   | Detected | 1755.6   | Detected   | 2860.8   | Detected   | 2198.3   | Detected   | Farp2         | 1.012481577 | 1.31761238 | 1.2521645  | 1.6295284 |
| A_55_P1983 | 304.5    | Detected | 175.9    | Detected   | 311.8    | Detected   | 308.3    | Detected   | Crat          | 1.012479475 | 1.02397373 | 1.7527004  | 1.7725981 |
| A_55_P2026 | 160.4    | Detected | 120.9    | Detected   | 160.7    | Detected   | 162.4    | Detected   | Inpp5e        | 1.012468828 | 1.00187032 | 1.34325889 | 1.3291977 |
| A_55_P1981 | 820.6    | Detected | 689.2    | Detected   | 1064.8   | Detected   | 830.8    | Detected   | Trub2         | 1.012429929 | 1.29758713 | 1.2054556  | 1.5449797 |
| A_66_P1034 | 49       | Detected | 38.5     | Detected   | 61.3     | Detected   | 49.6     | Not Detect | AA387883      | 1.012244898 | 1.25102041 | 1.28831169 | 1.5922078 |
| A_52_P1082 | 123.3    | Detected | 89.3     | Detected   | 89.9     | Detected   | 124.8    | Detected   | Gm4532        | 1.01216545  | 0.72911598 | 1.39753639 | 1.0067189 |
| A_55_P2076 | 41.3     | Detected | 54.2     | Detected   | 40.8     | Detected   | 41.8     | Not Detect | Fntb          | 1.012106538 | 0.98789346 | 0.77121771 | 0.7527675 |
| A_52_P1397 | 56640.6  | Detected | 50657.1  | Detected   | 55090.7  | Detected   | 57325.3  | Detected   | Ndufa1        | 1.012088502 | 0.97263624 | 1.13163407 | 1.0875218 |
| A_52_P5563 | 1127.3   | Detected | 1013.2   | Detected   | 935.4    | Detected   | 1140.9   | Detected   | Txlng         | 1.012064224 | 0.82977025 | 1.12603632 | 0.9232136 |
| A_55_P2173 | 24435.9  | Detected | 25287.3  | Detected   | 22852    | Detected   | 24729.5  | Detected   | Commd1        | 1.012015109 | 0.93518143 | 0.9779415  | 0.9036947 |
| A_55_P2344 | 716.1    | Detected | 533.2    | Detected   | 607      | Detected   | 724.7    | Detected   | B130055M24Rik | 1.012009496 | 0.84764698 | 1.35915229 | 1.1384096 |

|            |          |            |          |            |          |            |          |            |               |             |            |            |           |
|------------|----------|------------|----------|------------|----------|------------|----------|------------|---------------|-------------|------------|------------|-----------|
| A_52_P1835 | 67.1     | Detected   | 46.1     | Detected   | 62.9     | Detected   | 67.9     | Detected   | Tmem86b       | 1.011922504 | 0.93740686 | 1.47288503 | 1.3644252 |
| A_55_P2008 | 267733.7 | Detected   | 261354   | Detected   | 215578.5 | Detected   | 270902.3 | Detected   | Actg1         | 1.011834894 | 0.80519748 | 1.03653397 | 0.8248525 |
| A_55_P2069 | 75770.3  | Detected   | 76438.8  | Detected   | 71237.8  | Detected   | 76664.6  | Detected   | Prpsap1       | 1.011802778 | 0.94018105 | 1.002954   | 0.9319586 |
| A_52_P1604 | 118.8    | Detected   | 85       | Detected   | 108.2    | Detected   | 120.2    | Detected   | Ubr3          | 1.011784512 | 0.91077441 | 1.41411765 | 1.2729412 |
| A_51_P3635 | 1646.3   | Detected   | 1143.7   | Detected   | 1511.3   | Detected   | 1665.6   | Detected   | Fbrsl1        | 1.011723258 | 0.91799793 | 1.45632596 | 1.321413  |
| A_51_P3786 | 17159.2  | Detected   | 20310.7  | Detected   | 16530.3  | Detected   | 17360.3  | Detected   | Wrap53        | 1.011719661 | 0.96334911 | 0.85473667 | 0.8138715 |
| A_55_P2092 | 15983.4  | Detected   | 13627.9  | Detected   | 13864.9  | Detected   | 16170.7  | Detected   | Rassf1        | 1.011718408 | 0.86745624 | 1.18658781 | 1.0173908 |
| A_51_P1678 | 36742.4  | Detected   | 41578.1  | Detected   | 36290.5  | Detected   | 37172.5  | Detected   | Timm17a       | 1.011705822 | 0.98770086 | 0.89404037 | 0.8728273 |
| A_51_P2797 | 9358     | Detected   | 9249     | Detected   | 3982.1   | Detected   | 9467.4   | Detected   | Rell1         | 1.011690532 | 0.42552896 | 1.02361336 | 0.4305438 |
| A_55_P2174 | 11208.3  | Detected   | 14436.2  | Detected   | 11711.4  | Detected   | 11339.2  | Detected   | Akr1b3        | 1.011678845 | 1.04488638 | 0.78546986 | 0.8112523 |
| A_55_P2172 | 4970.6   | Detected   | 3597.2   | Detected   | 4108.9   | Detected   | 5028.5   | Detected   | Fam174a       | 1.011648493 | 0.82664065 | 1.39789281 | 1.1422495 |
| A_51_P1920 | 3617.2   | Detected   | 3667.3   | Detected   | 3723.2   | Detected   | 3659     | Detected   | Pinx1         | 1.0115559   | 1.02930443 | 0.99773675 | 1.0152428 |
| A_52_P4228 | 7639.2   | Detected   | 6295.1   | Detected   | 5777.3   | Detected   | 7727.4   | Detected   | Hspg2         | 1.011545712 | 0.75627029 | 1.22752617 | 0.9177455 |
| A_55_P2176 | 2050.6   | Detected   | 1531.2   | Detected   | 1984     | Detected   | 2074.2   | Detected   | Donson        | 1.011508827 | 0.9675217  | 1.35462382 | 1.2957158 |
| A_55_P1974 | 678.1    | Detected   | 575.5    | Detected   | 616.4    | Detected   | 685.9    | Detected   | Fam126b       | 1.011502728 | 0.90901047 | 1.19183319 | 1.0710686 |
| A_55_P2171 | 8.7      | Not Detect | 14.7     | Not Detect | 17.3     | Detected   | 8.8      | Not Detect | Gm10588       | 1.011494253 | 1.98850575 | 0.59863946 | 1.1768707 |
| A_55_P2017 | 12126.4  | Detected   | 8550.5   | Detected   | 10640.8  | Detected   | 12265.6  | Detected   | Mpnd          | 1.011479087 | 0.87749043 | 1.43448921 | 1.2444652 |
| A_52_P6646 | 3005.9   | Detected   | 3179.4   | Detected   | 3327.2   | Detected   | 3040.2   | Detected   | Cul1          | 1.011410892 | 1.10688978 | 0.95621815 | 1.0464868 |
| A_51_P2001 | 23686.6  | Detected   | 23372.5  | Detected   | 21808.7  | Detected   | 23955.9  | Detected   | Pak1ip1       | 1.011369297 | 0.92071889 | 1.02496096 | 0.9330923 |
| A_55_P1992 | 340503.9 | Detected   | 333911.4 | Detected   | 361298.9 | Detected   | 344373.3 | Detected   | Chchd2        | 1.011363746 | 1.06107125 | 1.03133137 | 1.0820203 |
| A_51_P3150 | 16828.6  | Detected   | 13150.6  | Detected   | 15542.3  | Detected   | 17018.4  | Detected   | Mia3          | 1.011278419 | 0.92356465 | 1.29411586 | 1.18187   |
| A_52_P6397 | 4365.4   | Detected   | 4462.8   | Detected   | 4977.8   | Detected   | 4414.6   | Detected   | Gart          | 1.011270445 | 1.14028497 | 0.98919961 | 1.1153984 |
| A_52_P2540 | 17.8     | Detected   | 15.3     | Not Detect | 12.8     | Not Detect | 18       | Not Detect | Ifn13         | 1.011235955 | 0.71910112 | 1.17647059 | 0.8366013 |
| A_51_P1988 | 2272     | Detected   | 2432     | Detected   | 1731.2   | Detected   | 2297.4   | Detected   | Dnajb9        | 1.011179577 | 0.76197183 | 0.94465461 | 0.7118421 |
| A_55_P2002 | 242.8    | Detected   | 170.3    | Detected   | 196.3    | Detected   | 245.5    | Detected   | 1810053B23Rik | 1.011120264 | 0.80848435 | 1.44157369 | 1.1526718 |
| A_55_P2269 | 135.5    | Detected   | 121.1    | Detected   | 180.4    | Detected   | 137      | Detected   | Ccdc163       | 1.011070111 | 1.33136531 | 1.13129645 | 1.489678  |
| A_55_P1958 | 136.1    | Detected   | 97.9     | Detected   | 156.3    | Detected   | 137.6    | Detected   | Lyn           | 1.011021308 | 1.14842028 | 1.40551583 | 1.5965271 |
| A_66_P1297 | 9.1      | Not Detect | 16.4     | Detected   | 10.2     | Not Detect | 9.2      | Not Detect | Gm6329        | 1.010989011 | 1.12087912 | 0.56097561 | 0.6219512 |
| A_55_P1957 | 10872.9  | Detected   | 9053.5   | Detected   | 9697.9   | Detected   | 10991.7  | Detected   | Gps2          | 1.010926248 | 0.89193315 | 1.21408295 | 1.0711769 |
| A_55_P1984 | 6249.1   | Detected   | 5239.4   | Detected   | 6537.7   | Detected   | 6317.2   | Detected   | Polr2i        | 1.010897569 | 1.04618265 | 1.20571058 | 1.2477955 |
| A_55_P1981 | 344664.8 | Detected   | 333770.2 | Detected   | 351359   | Detected   | 348401.4 | Detected   | Rpl10a        | 1.010841258 | 1.01942235 | 1.04383615 | 1.0526973 |
| A_55_P2082 | 12860.6  | Detected   | 16850.5  | Detected   | 14052.8  | Detected   | 12999.7  | Detected   | Pwp2          | 1.010815981 | 1.09270174 | 0.77147266 | 0.8339693 |
| A_66_P1081 | 120.7    | Detected   | 86.1     | Detected   | 199.6    | Detected   | 122      | Detected   | Impact        | 1.010770505 | 1.65368683 | 1.41695703 | 2.3182346 |
| A_55_P2359 | 3625.5   | Detected   | 3088.8   | Detected   | 3880.7   | Detected   | 3664.5   | Detected   | AI646519      | 1.010757137 | 1.07039029 | 1.18638306 | 1.2563779 |
| A_55_P2081 | 58183    | Detected   | 42339.2  | Detected   | 53077    | Detected   | 58804.1  | Detected   | Sh3bgr13      | 1.010674939 | 0.91224241 | 1.38888075 | 1.2536137 |
| A_51_P1329 | 2100.7   | Detected   | 1280.5   | Detected   | 2751.4   | Detected   | 2123.1   | Detected   | Idh1          | 1.010663112 | 1.30975389 | 1.65802421 | 2.1486919 |
| A_55_P2057 | 56.4     | Detected   | 98.4     | Detected   | 50.6     | Detected   | 57       | Detected   | Gm12250       | 1.010638298 | 0.89716312 | 0.57926829 | 0.5142276 |
| A_55_P2043 | 18404.1  | Detected   | 13626.2  | Detected   | 17575    | Detected   | 18597.4  | Detected   | Ubac1         | 1.010503094 | 0.95495026 | 1.36482658 | 1.2897947 |
| A_55_P2008 | 66.8     | Detected   | 166.7    | Detected   | 44.5     | Detected   | 67.5     | Detected   | Dnmt3b        | 1.010479042 | 0.66616766 | 0.40491902 | 0.2669466 |
| A_52_P2820 | 9785.4   | Detected   | 6661.8   | Detected   | 8614.1   | Detected   | 9886.5   | Detected   | Rnf5          | 1.010331719 | 0.88030127 | 1.48405836 | 1.2930589 |

|            |          |            |          |            |          |          |          |            |               |             |             |            |            |           |
|------------|----------|------------|----------|------------|----------|----------|----------|------------|---------------|-------------|-------------|------------|------------|-----------|
| A_55_P2077 | 11783.3  | Detected   | 11447    | Detected   | 11329.6  | Detected | 11904.8  | Detected   | Hmgxb3        | 1.010311203 | 0.96149636  | 1.03999301 | 0.989744   |           |
| A_51_P1709 | 1999.3   | Detected   | 1373.5   | Detected   | 1688     | Detected | 2019.9   | Detected   | Ptpn9         | 1.010303606 | 0.8442955   | 1.4706225  | 1.2289771  |           |
| A_55_P1968 | 37475.9  | Detected   | 34755.1  | Detected   | 46781    | Detected | 37855.9  | Detected   | LOC102308570  | 1.01013985  | 1.24829557  | 1.08921856 | 1.3460183  |           |
| A_51_P2955 | 109      | Detected   | 97.1     | Detected   | 126.2    | Detected | 110.1    | Detected   | Cmss1         | 1.010091743 | 1.15779817  | 1.1338826  | 1.299691   |           |
| A_55_P2003 | 69.4     | Detected   | 71.6     | Detected   | 63.2     | Detected | 70.1     | Detected   | Zc2hc1c       | 1.010086455 | 0.91066282  | 0.97905028 | 0.8826816  |           |
| A_55_P2032 | 13519.8  | Detected   | 14581.8  | Detected   | 15274    | Detected | 13656.1  | Detected   | Srp19         | 1.01008151  | 1.12975044  | 0.93651675 | 1.0474701  |           |
| A_52_P8480 | 167794.1 | Detected   | 165236.5 | Detected   | 193296.7 | Detected | 169485.2 | Detected   | Gm13777       | 1.010078423 | 1.15198747  | 1.02571284 | 1.1698184  |           |
| A_55_P1954 | 10       | Not Detect | 6.3      | Not Detect | 19.2     | Detected | 10.1     | Not Detect | Nrxn2         | 1.01        | 1.92        | 1.6031746  | 3.047619   |           |
| A_55_P2093 | 219337.1 | Detected   | 219892.5 | Detected   | 212812.1 | Detected | 221525.4 | Detected   | Rps8          | 1.00997688  | 0.97025127  | 1.0074259  | 0.9678006  |           |
| A_52_P1148 | 292.3    | Detected   | 292.6    | Detected   | 268.3    | Detected | 295.2    | Detected   | Hlhf          | 1.009921314 | 0.91789258  | 1.00888585 | 0.9169515  |           |
| A_51_P3143 | 61395.6  | Detected   | 66533.3  | Detected   | 73771.8  | Detected | 62003.6  | Detected   | Lsmd1         | 1.00990299  | 1.20158122  | 0.9319183  | 1.1087951  |           |
| A_55_P1954 | 50.7     | Detected   | 48.6     | Detected   | 48.2     | Detected | 51.2     | Detected   | Zfp446        | 1.009861933 | 0.95069034  | 1.05349794 | 0.9917695  |           |
| A_66_P1104 | 5981.7   | Detected   | 8232     | Detected   | 6350.4   | Detected | 6040.6   | Detected   | Polr3h        | 1.009846699 | 1.061638    | 0.73379495 | 0.7714286  |           |
| A_65_P0447 | 8052.7   | Detected   | 9291.5   | Detected   | 7513.4   | Detected | 8131.8   | Detected   | Atp6v1c1      | 1.009822792 | 0.93302867  | 0.875187   | 0.8086315  |           |
| A_55_P2112 | 468912.3 | Detected   | 445417.6 | Detected   | 451150.4 | Detected | 473513.6 | Detected   | Actb          | 1.009812709 | 0.96212106  | 1.06307788 | 1.0128706  |           |
| A_51_P4107 | 703.6    | Detected   | 717.1    | Detected   | 618.4    | Detected | 710.5    | Detected   | Dgke          | 1.009806708 | 0.87890847  | 0.99079626 | 0.8623623  |           |
| A_52_P6592 | 5907.9   | Detected   | 4348.3   | Detected   | 5638.9   | Detected | 5965     | Detected   | Ppat          | 1.009665025 | 0.95446775  | 1.37180047 | 1.2968056  |           |
| A_55_P2021 | 292730.2 | Detected   | 292225.2 | Detected   | 303764   | Detected | 295552.3 | Detected   | Gm5879        | 1.009640618 | 1.03769273  | 1.0113854  | 1.039486   |           |
| A_55_P2198 | 51.9     | Detected   | 53.2     | Detected   | 28.3     | Detected | 52.4     | Not Detect | 5830420C07Rik | 1.009633911 | 0.54527938  | 0.98496241 | 0.5319549  |           |
| A_55_P1968 | 52.1     | Detected   | 43.3     | Detected   | 36       | Detected | 52.6     | Detected   | Cyp2j13       | 1.009596929 | 0.69097889  | 1.2147806  | 0.8314088  |           |
| A_55_P1968 | 1127.4   | Detected   | 1025     | Detected   | 1061.3   | Detected | 1138.2   | Detected   | Nfkb1         | 1.009579564 | 0.94136952  | 1.11043902 | 1.0354146  |           |
| A_55_P2007 | 17843    | Detected   | 15747.3  | Detected   | 15775.9  | Detected | 18013.8  | Detected   | Pole          | 1.009572381 | 0.88415065  | 1.14392944 | 1.0018162  |           |
| A_52_P3077 | 73.4     | Detected   | 57.9     | Detected   | 70.1     | Detected | 74.1     | Detected   | Slc35a5       | 1.009536785 | 0.95504087  | 1.27979275 | 1.2107081  |           |
| A_55_P2094 | 10.5     | Not Detect | 10.9     | Not Detect | 38.4     | Detected | 10.6     | Not Detect | Tph1          | 1.00952381  | 3.65714286  | 0.97247706 | 3.5229358  |           |
| A_51_P4854 | 505.6    | Detected   | 564.7    | Detected   | 474.9    | Detected | 510.4    | Detected   | Txlna         | 1.009493671 | 0.93928006  | 0.90384275 | 0.8409775  |           |
| A_55_P2067 | 874.7    | Detected   | 742.6    | Detected   | 837.5    | Detected | 883      | Detected   | Cdv3          | 1.009488968 | 0.95747113  | 1.18906545 | 1.1277942  |           |
| A_66_P1257 | 101861.2 | Detected   | 50250.7  | Detected   | 165764.7 | Detected | 102826.4 | Detected   | Cyb5          | 1.009475639 | 1.6273586   | 2.04626801 | 3.298754   |           |
| A_55_P2177 | 138.3    | Detected   | 111.2    | Detected   | 149.7    | Detected | 139.6    | Detected   | Hist1h2bb     | 1.009399855 | 1.0824295   | 1.25539568 | 1.346223   |           |
| A_55_P2073 | 7443.5   | Detected   | 6959.1   | Detected   | 8779.3   | Detected | 7512.8   | Detected   | Bnip3l        | 1.009310136 | 1.17945859  | 1.07956489 | 1.2615568  |           |
| A_55_P1960 | 2850.8   | Detected   | 2244.5   | Detected   | 2752.6   | Detected | 2877.3   | Detected   | Dnajc17       | 1.009295636 | 0.96555353  | 1.28193362 | 1.2263756  |           |
| A_52_P6617 | 58778.9  | Detected   | 52833.8  | Detected   | 73941.3  | Detected | 59323.4  | Detected   |               | 2-Mar       | 1.009263528 | 1.25795651 | 1.12283046 | 1.3995075 |
| A_55_P1977 | 307321.9 | Detected   | 316581.4 | Detected   | 315439.1 | Detected | 310168.6 | Detected   | Rps20         | 1.009262926 | 1.0264127   | 0.9797436  | 0.9963918  |           |
| A_52_P3111 | 249.8    | Detected   | 303.7    | Detected   | 336.8    | Detected | 252.1    | Detected   | Trappc13      | 1.009207366 | 1.34827862  | 0.83009549 | 1.1089891  |           |
| A_55_P1961 | 50809.5  | Detected   | 46443.4  | Detected   | 42110.8  | Detected | 51276.4  | Detected   | Vcp           | 1.009189226 | 0.82879776  | 1.10406215 | 0.9067123  |           |
| A_55_P2011 | 505.9    | Detected   | 619.6    | Detected   | 706.3    | Detected | 510.5    | Detected   | Pa2g4         | 1.009092706 | 1.39612572  | 0.82391866 | 1.139929   |           |
| A_55_P2108 | 3309.6   | Detected   | 2951     | Detected   | 2992.3   | Detected | 3339.5   | Detected   | D830030K20Rik | 1.009034324 | 0.90412739  | 1.13165029 | 1.0139953  |           |
| A_66_P1249 | 2199.4   | Detected   | 2217.1   | Detected   | 2313     | Detected | 2219.2   | Detected   | Ccdc47        | 1.009002455 | 1.05165045  | 1.00094718 | 1.0432547  |           |
| A_52_P6224 | 7645.8   | Detected   | 7794.8   | Detected   | 7407.9   | Detected | 7714.2   | Detected   | Nop16         | 1.008946088 | 0.96888488  | 0.98965977 | 0.9503643  |           |
| A_55_P2013 | 11849.5  | Detected   | 12010.9  | Detected   | 11672.7  | Detected | 11955.5  | Detected   | Thoc5         | 1.008945525 | 0.98507954  | 0.99538752 | 0.9718422  |           |
| A_52_P6237 | 1723.3   | Detected   | 1550.4   | Detected   | 1812.1   | Detected | 1738.7   | Detected   | Eri2          | 1.008936343 | 1.05152904  | 1.12145253 | 1.1687951  |           |

|            |                  |                  |                  |                  |               |             |            |            |           |
|------------|------------------|------------------|------------------|------------------|---------------|-------------|------------|------------|-----------|
| A_55_P2061 | 22.6 Detected    | 31.2 Detected    | 28.8 Detected    | 22.8 Not Detect  | Scgb2b2       | 1.008849558 | 1.27433628 | 0.73076923 | 0.9230769 |
| A_55_P1981 | 6969.3 Detected  | 5301.7 Detected  | 5207.9 Detected  | 7030.7 Detected  | Erc6c12       | 1.008810067 | 0.747263   | 1.32612181 | 0.9823076 |
| A_52_P6045 | 977.4 Detected   | 1081.1 Detected  | 619 Detected     | 986 Detected     | Zfp319        | 1.008798854 | 0.63331287 | 0.91203404 | 0.572565  |
| A_52_P2311 | 182.7 Detected   | 131.3 Detected   | 123.3 Detected   | 184.3 Detected   | Megf9         | 1.008757526 | 0.67487685 | 1.40365575 | 0.9390708 |
| A_55_P2040 | 55089.3 Detected | 45698.5 Detected | 56248 Detected   | 55570.3 Detected | Scrib         | 1.008731278 | 1.02103312 | 1.21602022 | 1.23085   |
| A_51_P3082 | 4214.6 Detected  | 3663.1 Detected  | 4157 Detected    | 4251.3 Detected  | Surf2         | 1.008707825 | 0.98633322 | 1.16057438 | 1.1348312 |
| A_55_P1980 | 21824.2 Detected | 12267.6 Detected | 14725.1 Detected | 22013.3 Detected | Leprot        | 1.008664693 | 0.67471431 | 1.79442597 | 1.2003244 |
| A_55_P1967 | 129.5 Detected   | 85.9 Detected    | 105.5 Detected   | 130.6 Detected   | Gm14137       | 1.008494208 | 0.81467181 | 1.52037253 | 1.2281723 |
| A_51_P5063 | 25118.5 Detected | 22519.4 Detected | 26623 Detected   | 25331.3 Detected | Cdkn2aipnl    | 1.008471843 | 1.05989609 | 1.12486567 | 1.1822251 |
| A_55_P2150 | 5367.5 Detected  | 6235.6 Detected  | 5060.7 Detected  | 5412.9 Detected  | Sypl          | 1.008458314 | 0.94284117 | 0.86806402 | 0.8115819 |
| A_55_P2006 | 910.9 Detected   | 813.1 Detected   | 1213.7 Detected  | 918.6 Detected   | Trio          | 1.008453178 | 1.33241849 | 1.12975034 | 1.4926823 |
| A_51_P3125 | 1692.2 Detected  | 1253.8 Detected  | 1435.5 Detected  | 1706.5 Detected  | Nup188        | 1.008450538 | 0.84830398 | 1.36106237 | 1.1449194 |
| A_52_P3650 | 82.9 Detected    | 41.6 Detected    | 113 Detected     | 83.6 Detected    | Fes           | 1.008443908 | 1.36308806 | 2.00961538 | 2.7163462 |
| A_55_P2035 | 22960.7 Detected | 27007.6 Detected | 28132.9 Detected | 23154.2 Detected | Nifk          | 1.008427443 | 1.22526317 | 0.85732164 | 1.041666  |
| A_55_P2123 | 77681.9 Detected | 83564 Detected   | 81668 Detected   | 78336.4 Detected | Dos           | 1.008425386 | 1.05131311 | 0.93744196 | 0.9773108 |
| A_51_P4128 | 12759.2 Detected | 11651.2 Detected | 12523 Detected   | 12866 Detected   | Daxx          | 1.008370431 | 0.98148787 | 1.10426394 | 1.0748249 |
| A_55_P2105 | 60 Detected      | 65.7 Detected    | 38.8 Detected    | 60.5 Detected    | Olf224        | 1.008333333 | 0.64666667 | 0.92085236 | 0.5905632 |
| A_55_P2115 | 2269.5 Detected  | 2013.8 Detected  | 2166.7 Detected  | 2288.4 Detected  | Egfl8         | 1.008327826 | 0.95470368 | 1.13635912 | 1.0759261 |
| A_52_P2283 | 37156.9 Detected | 40241.5 Detected | 39390.6 Detected | 37465.9 Detected | Smu1          | 1.008316087 | 1.06011535 | 0.93102643 | 0.9788552 |
| A_51_P2063 | 11781.5 Detected | 9491.4 Detected  | 9291.5 Detected  | 11879.3 Detected | Reep3         | 1.00830115  | 0.7886517  | 1.25158565 | 0.9789388 |
| A_55_P2102 | 7858.4 Detected  | 6743.7 Detected  | 7470.9 Detected  | 7923.6 Detected  | Rgs20         | 1.008296854 | 0.95068971 | 1.1749633  | 1.107834  |
| A_55_P2038 | 4848.1 Detected  | 4533.4 Detected  | 3881.7 Detected  | 4888 Detected    | Gcn111        | 1.008230028 | 0.80066418 | 1.07821944 | 0.8562448 |
| A_55_P2087 | 693.6 Detected   | 659.8 Detected   | 718.6 Detected   | 699.3 Detected   | Grhpr         | 1.008217993 | 1.03604383 | 1.05986663 | 1.0891179 |
| A_55_P2088 | 1398.5 Detected  | 708.3 Detected   | 1153.9 Detected  | 1409.9 Detected  | Gm5595        | 1.008151591 | 0.82509832 | 1.99054073 | 1.629112  |
| A_55_P2006 | 2203.4 Detected  | 2659 Detected    | 1299.9 Detected  | 2221.3 Detected  | Adamtsl4      | 1.008123809 | 0.58995189 | 0.83538924 | 0.488868  |
| A_55_P1993 | 1753.6 Detected  | 1451.3 Detected  | 1963.9 Detected  | 1767.8 Detected  | Polr2h        | 1.008097628 | 1.11992473 | 1.21808034 | 1.3532006 |
| A_51_P2220 | 5097.2 Detected  | 4979.4 Detected  | 5061.6 Detected  | 5138.4 Detected  | Igfbp1        | 1.008082869 | 0.99301577 | 1.03193156 | 1.016508  |
| A_55_P2145 | 12.4 Not Detect  | 15.4 Detected    | 9.8 Not Detect   | 12.5 Not Detect  | Cpsf3l        | 1.008064516 | 0.79032258 | 0.81168831 | 0.6363636 |
| A_55_P2149 | 75.2 Detected    | 52.9 Detected    | 50.6 Detected    | 75.8 Detected    | Srsf11        | 1.007978723 | 0.67287234 | 1.43289225 | 0.9565217 |
| A_55_P2000 | 4719.7 Detected  | 5174.6 Detected  | 4837.6 Detected  | 4756.9 Detected  | Ppp2r3c       | 1.007881857 | 1.0249804  | 0.91927878 | 0.9348742 |
| A_55_P1985 | 549.4 Detected   | 473.4 Detected   | 500.5 Detected   | 553.7 Detected   | Krtap5-2      | 1.00782672  | 0.91099381 | 1.169624   | 1.0572455 |
| A_55_P1956 | 2547.5 Detected  | 2255.4 Detected  | 2172.1 Detected  | 2567.4 Detected  | Usp45         | 1.00781158  | 0.85263984 | 1.13833466 | 0.9630664 |
| A_55_P2060 | 3297.4 Detected  | 4435.3 Detected  | 2931.7 Detected  | 3323 Detected    | Zfp593        | 1.007763693 | 0.88909444 | 0.74921651 | 0.6609925 |
| A_55_P1979 | 25.8 Detected    | 27.2 Detected    | 25.6 Detected    | 26 Not Detect    | Slc16a7       | 1.007751938 | 0.99224806 | 0.95588235 | 0.9411765 |
| A_55_P2109 | 1161.2 Detected  | 1211.9 Detected  | 1277.5 Detected  | 1170.2 Detected  | Csnk1g2       | 1.007750603 | 1.10015501 | 0.96559122 | 1.0541299 |
| A_55_P1982 | 12781.2 Detected | 10662.5 Detected | 11939.8 Detected | 12879.7 Detected | 2210018M11Rik | 1.007706632 | 0.93416894 | 1.20794373 | 1.1197937 |
| A_52_P4989 | 1585.1 Detected  | 1453.4 Detected  | 1352.6 Detected  | 1597.3 Detected  | Zfp512        | 1.007696675 | 0.85332156 | 1.09900922 | 0.9306454 |
| A_51_P2486 | 104.1 Detected   | 158 Detected     | 114.9 Detected   | 104.9 Detected   | Cd274         | 1.007684918 | 1.1037464  | 0.66392405 | 0.7272152 |
| A_52_P6000 | 260.5 Detected   | 218.6 Detected   | 255.1 Detected   | 262.5 Detected   | Smyd3         | 1.007677543 | 0.97927063 | 1.20082342 | 1.1669716 |
| A_55_P2070 | 887.3 Detected   | 721.9 Detected   | 725.5 Detected   | 894.1 Detected   | Pqbp1         | 1.007663699 | 0.81764905 | 1.23853719 | 1.0049868 |

|            |          |          |          |            |          |            |          |            |               |             |            |            |           |
|------------|----------|----------|----------|------------|----------|------------|----------|------------|---------------|-------------|------------|------------|-----------|
| A_52_P6501 | 952.6    | Detected | 780.7    | Detected   | 888.4    | Detected   | 959.9    | Detected   | Uri1          | 1.007663237 | 0.9326055  | 1.22953759 | 1.1379531 |
| A_55_P2157 | 796.7    | Detected | 522.5    | Detected   | 554.3    | Detected   | 802.8    | Detected   | Fam20c        | 1.007656583 | 0.69574495 | 1.53645933 | 1.0608612 |
| A_52_P2673 | 130.8    | Detected | 128.3    | Detected   | 96.7     | Detected   | 131.8    | Detected   | Trim12a       | 1.00764526  | 0.73929664 | 1.02727981 | 0.7537023 |
| A_55_P2022 | 78.7     | Detected | 108.9    | Detected   | 86.4     | Detected   | 79.3     | Detected   | Gm826         | 1.007623888 | 1.0978399  | 0.728191   | 0.7933884 |
| A_55_P2124 | 195596.7 | Detected | 195964.2 | Detected   | 183100.3 | Detected   | 197063.2 | Detected   | Ywhae         | 1.00749757  | 0.9361114  | 1.00560817 | 0.9343559 |
| A_51_P4724 | 467.4    | Detected | 550.5    | Detected   | 396.7    | Detected   | 470.9    | Detected   | Dync2li1      | 1.007488233 | 0.8487377  | 0.85540418 | 0.7206176 |
| A_55_P2007 | 1376.1   | Detected | 1540.3   | Detected   | 1709     | Detected   | 1386.4   | Detected   | Trmt61b       | 1.007484921 | 1.24191556 | 0.9000844  | 1.1095241 |
| A_55_P2119 | 1621.2   | Detected | 920.8    | Detected   | 1682.4   | Detected   | 1633.2   | Detected   | Baiap2        | 1.007401925 | 1.03774981 | 1.77367507 | 1.8271069 |
| A_55_P1966 | 67.7     | Detected | 50.7     | Detected   | 69.6     | Detected   | 68.2     | Detected   | Il17d         | 1.007385524 | 1.02806499 | 1.34516765 | 1.3727811 |
| A_55_P2184 | 7157.3   | Detected | 6297.7   | Detected   | 3732.4   | Detected   | 7210.1   | Detected   | Katnal1       | 1.007377084 | 0.52148156 | 1.14487829 | 0.5926608 |
| A_55_P2005 | 12804.1  | Detected | 11521.6  | Detected   | 9954.3   | Detected   | 12897.8  | Detected   | Uap1          | 1.007317968 | 0.77743067 | 1.11944522 | 0.8639685 |
| A_51_P1493 | 1715.6   | Detected | 1434.6   | Detected   | 1477.3   | Detected   | 1728.1   | Detected   | Nfxl1         | 1.007286081 | 0.86109816 | 1.20458664 | 1.0297644 |
| A_52_P5160 | 2788.5   | Detected | 2493.6   | Detected   | 2175.7   | Detected   | 2808.7   | Detected   | Ptp4a1        | 1.007244038 | 0.78024027 | 1.12636349 | 0.8725136 |
| A_55_P2175 | 158321.9 | Detected | 160139.4 | Detected   | 162040.6 | Detected   | 159453   | Detected   | Gm5879        | 1.007144305 | 1.02348822 | 0.99571373 | 1.0118722 |
| A_52_P2394 | 798.6    | Detected | 926.2    | Detected   | 716.8    | Detected   | 804.3    | Detected   | Ipo7          | 1.007137491 | 0.89757075 | 0.86838696 | 0.7739149 |
| A_55_P2067 | 126.9    | Detected | 94.1     | Detected   | 98.2     | Detected   | 127.8    | Detected   | LOC101056395  | 1.007092199 | 0.77383767 | 1.35812965 | 1.0435707 |
| A_55_P2014 | 156.2    | Detected | 136.8    | Detected   | 149.2    | Detected   | 157.3    | Detected   | Zfp787        | 1.007042254 | 0.95518566 | 1.1498538  | 1.0906433 |
| A_66_P1161 | 65746.3  | Detected | 87168.7  | Detected   | 64794.7  | Detected   | 66209.2  | Detected   | Sdhd          | 1.0070407   | 0.98552618 | 0.75955245 | 0.7433253 |
| A_52_P2064 | 24979.1  | Detected | 19834    | Detected   | 21471.2  | Detected   | 25152.2  | Detected   | Pop4          | 1.006929793 | 0.8595666  | 1.26813552 | 1.0825451 |
| A_51_P2964 | 23528.6  | Detected | 29992.8  | Detected   | 19590.5  | Detected   | 23690.9  | Detected   | Orc6          | 1.006897988 | 0.83262498 | 0.78988624 | 0.6531734 |
| A_55_P2062 | 3655     | Detected | 2568     | Detected   | 3400.4   | Detected   | 3680.2   | Detected   | Hmox2         | 1.006894665 | 0.930342   | 1.43309969 | 1.3241433 |
| A_55_P2112 | 11007.7  | Detected | 10186    | Detected   | 12263.8  | Detected   | 11082.9  | Detected   | Smad4         | 1.006831582 | 1.11411103 | 1.08805223 | 1.2039859 |
| A_55_P2127 | 17940.4  | Detected | 20100    | Detected   | 26903.3  | Detected   | 18061.4  | Detected   | Trmt112       | 1.006744554 | 1.4995931  | 0.89857711 | 1.3384726 |
| A_52_P8341 | 44.5     | Detected | 32.7     | Detected   | 44.8     | Detected   | 44.8     | Not Detect | 3021401N23Rik | 1.006741573 | 1.00674157 | 1.37003058 | 1.3700306 |
| A_55_P2294 | 133.9    | Detected | 104.9    | Detected   | 203.4    | Detected   | 134.8    | Detected   | Dennd1b       | 1.006721434 | 1.51904406 | 1.28503337 | 1.9389895 |
| A_55_P2020 | 1206.5   | Detected | 999.6    | Detected   | 1022.8   | Detected   | 1214.6   | Detected   | Rufy2         | 1.006713634 | 0.8477414  | 1.21508603 | 1.0232093 |
| A_52_P1545 | 417.6    | Detected | 307      | Detected   | 464.7    | Detected   | 420.4    | Detected   | Wdr20         | 1.006704981 | 1.11278736 | 1.36938111 | 1.5136808 |
| A_55_P2470 | 164.7    | Detected | 133      | Detected   | 125      | Detected   | 165.8    | Detected   | 9530082P21Rik | 1.00667881  | 0.75895568 | 1.24661654 | 0.9398496 |
| A_55_P2274 | 15       | Detected | 17.9     | Detected   | 13.5     | Not Detect | 15.1     | Not Detect | AW549542      | 1.006666667 | 0.9        | 0.84357542 | 0.7541899 |
| A_55_P2029 | 4379.9   | Detected | 4395.8   | Detected   | 5059.8   | Detected   | 4409     | Detected   | Mpdu1         | 1.006643987 | 1.15523185 | 1.00300287 | 1.1510533 |
| A_52_P8096 | 226.4    | Detected | 156.5    | Detected   | 215.1    | Detected   | 227.9    | Detected   | Sephs1        | 1.006625442 | 0.95008834 | 1.45623003 | 1.3744409 |
| A_55_P2091 | 6705.7   | Detected | 6487.2   | Detected   | 9292.5   | Detected   | 6750     | Detected   | Nudt1         | 1.00660632  | 1.38576137 | 1.04051054 | 1.4324362 |
| A_51_P2117 | 15.2     | Detected | 13.1     | Not Detect | 11.4     | Not Detect | 15.3     | Not Detect | Rlbp1         | 1.006578947 | 0.75       | 1.16793893 | 0.870229  |
| A_51_P4664 | 5295.1   | Detected | 3955.9   | Detected   | 5168.8   | Detected   | 5329.8   | Detected   | Armc5         | 1.006553228 | 0.97614776 | 1.34730403 | 1.3066053 |
| A_55_P2012 | 391788   | Detected | 406729.7 | Detected   | 394359.4 | Detected   | 394342.7 | Detected   | Gm6177        | 1.006520618 | 1.00656324 | 0.96954488 | 0.9695859 |
| A_52_P4715 | 7024.6   | Detected | 8617     | Detected   | 7183.2   | Detected   | 7070.1   | Detected   | Dcaf13        | 1.006477237 | 1.0225778  | 0.82048277 | 0.833608  |
| A_55_P2105 | 6524     | Detected | 6392.6   | Detected   | 7157.3   | Detected   | 6566.2   | Detected   | Tbc1d31       | 1.006468424 | 1.09707235 | 1.0271564  | 1.1196227 |
| A_55_P2180 | 248555.1 | Detected | 265882.2 | Detected   | 260088.9 | Detected   | 250159   | Detected   | Gm15772       | 1.006452895 | 1.04640339 | 0.94086404 | 0.978211  |
| A_52_P6314 | 3917.5   | Detected | 3303.2   | Detected   | 5872.5   | Detected   | 3942.7   | Detected   | Exoc6         | 1.006432674 | 1.49904276 | 1.19360015 | 1.7778215 |
| A_51_P2337 | 7969.2   | Detected | 8109.5   | Detected   | 7121.1   | Detected   | 8020.4   | Detected   | Dmap1         | 1.006424735 | 0.89357777 | 0.98901289 | 0.8781183 |

|            |          |          |          |          |          |            |          |            |               |             |            |            |           |
|------------|----------|----------|----------|----------|----------|------------|----------|------------|---------------|-------------|------------|------------|-----------|
| A_55_P2085 | 4764.2   | Detected | 5509.1   | Detected | 2717.1   | Detected   | 4794.5   | Detected   | Ankle1        | 1.006359935 | 0.57031611 | 0.87028734 | 0.4932022 |
| A_55_P2027 | 1091.8   | Detected | 865      | Detected | 1229.2   | Detected   | 1098.7   | Detected   | Hist1h3f      | 1.006319839 | 1.12584722 | 1.27017341 | 1.4210405 |
| A_55_P2079 | 158.5    | Detected | 115.1    | Detected | 167.8    | Detected   | 159.5    | Detected   | Zfp382        | 1.006309148 | 1.05867508 | 1.38575152 | 1.4578627 |
| A_55_P2012 | 276      | Detected | 230.3    | Detected | 201.1    | Detected   | 277.7    | Detected   | Cacnb1        | 1.00615942  | 0.72862319 | 1.2058185  | 0.8732089 |
| A_55_P2361 | 977.2    | Detected | 2301.8   | Detected | 1115.5   | Detected   | 983.2    | Detected   | 2610201A13Rik | 1.006139992 | 1.14152681 | 0.42714397 | 0.4846207 |
| A_51_P2900 | 21970.1  | Detected | 20083.1  | Detected | 16802    | Detected   | 22104.6  | Detected   | Ddx3x         | 1.006121957 | 0.76476666 | 1.10065677 | 0.8366238 |
| A_52_P2193 | 736.7    | Detected | 812.9    | Detected | 786.5    | Detected   | 741.2    | Detected   | Tmem177       | 1.006108321 | 1.06759875 | 0.91179727 | 0.9675237 |
| A_51_P2825 | 117407.4 | Detected | 90766.1  | Detected | 92233.8  | Detected   | 118124.4 | Detected   | Rhoc          | 1.00610694  | 0.78558762 | 1.3014154  | 1.0161701 |
| A_55_P2013 | 284.3    | Detected | 258.2    | Detected | 240.8    | Detected   | 286      | Detected   | Apoc3         | 1.005979599 | 0.84699261 | 1.10766847 | 0.9326104 |
| A_55_P2035 | 25120.7  | Detected | 28787.5  | Detected | 27437    | Detected   | 25270.7  | Detected   | Odc1          | 1.005971171 | 1.09220683 | 0.87783587 | 0.9530873 |
| A_55_P2021 | 45079.7  | Detected | 40557.5  | Detected | 52125.8  | Detected   | 45347    | Detected   | Mrpl2         | 1.005929498 | 1.15630317 | 1.1180916  | 1.2852321 |
| A_55_P2014 | 27049.5  | Detected | 27632.3  | Detected | 26159.6  | Detected   | 27209.8  | Detected   | Ppa2          | 1.005926172 | 0.96710106 | 0.98470992 | 0.9467037 |
| A_52_P6320 | 2872.3   | Detected | 3132.1   | Detected | 3186.4   | Detected   | 2889.3   | Detected   | Gtf3c3        | 1.005918602 | 1.10935487 | 0.92248013 | 1.0173366 |
| A_51_P2627 | 1233.4   | Detected | 1364.8   | Detected | 734.9    | Detected   | 1240.7   | Detected   | 0610009L18Rik | 1.005918599 | 0.59583266 | 0.90907093 | 0.5384672 |
| A_55_P2071 | 21222.2  | Detected | 24885.1  | Detected | 24978.3  | Detected   | 21347.6  | Detected   | Fcf1          | 1.005908907 | 1.17698919 | 0.85784666 | 1.0037452 |
| A_55_P2095 | 5683.8   | Detected | 3174.5   | Detected | 6119.8   | Detected   | 5717     | Detected   | Pkn3          | 1.005841163 | 1.07670924 | 1.80091353 | 1.9277997 |
| A_55_P1956 | 101679.1 | Detected | 73977.6  | Detected | 110754.1 | Detected   | 102269.4 | Detected   | Polr2l        | 1.00580552  | 1.08925138 | 1.38243739 | 1.4971302 |
| A_55_P2027 | 104.5    | Detected | 83.9     | Detected | 97       | Detected   | 105.1    | Detected   | Gm8630        | 1.005741627 | 0.92822967 | 1.25268176 | 1.1561383 |
| A_52_P4680 | 3799     | Detected | 2754.1   | Detected | 2778.7   | Detected   | 3820.8   | Detected   | Setd1b        | 1.005738352 | 0.73142932 | 1.38731346 | 1.0089321 |
| A_51_P3445 | 491.5    | Detected | 480.5    | Detected | 413.3    | Detected   | 494.3    | Detected   | Irs4          | 1.005696846 | 0.84089522 | 1.02872008 | 0.8601457 |
| A_55_P2053 | 109299.3 | Detected | 116025.6 | Detected | 113365.4 | Detected   | 109919.4 | Detected   | Pdia6         | 1.005673412 | 1.03720152 | 0.94737196 | 0.9770723 |
| A_55_P2170 | 159.4    | Detected | 131.9    | Detected | 150.5    | Detected   | 160.3    | Detected   | Gm6729        | 1.005646173 | 0.94416562 | 1.21531463 | 1.1410159 |
| A_51_P1730 | 139252.3 | Detected | 163130   | Detected | 166467.7 | Detected   | 140018.2 | Detected   | Eif3l         | 1.005500089 | 1.1954395  | 0.85832281 | 1.0204604 |
| A_51_P1605 | 18.4     | Detected | 110.5    | Detected | 5.8      | Not Detect | 18.5     | Not Detect | 1700026D08Rik | 1.005434783 | 0.31521739 | 0.16742081 | 0.0524887 |
| A_55_P1962 | 4441.4   | Detected | 3759.3   | Detected | 4913     | Detected   | 4465.5   | Detected   | Coa5          | 1.005426217 | 1.10618274 | 1.18785412 | 1.3068922 |
| A_55_P2065 | 222.9    | Detected | 280.5    | Detected | 187.2    | Detected   | 224.1    | Detected   | Dyx1c1        | 1.00538358  | 0.83983849 | 0.79893048 | 0.6673797 |
| A_52_P7249 | 6237.3   | Detected | 5112.9   | Detected | 5215.8   | Detected   | 6270.8   | Detected   | Acbd3         | 1.005370914 | 0.83622721 | 1.22646639 | 1.0201256 |
| A_55_P2105 | 356.8    | Detected | 350.1    | Detected | 346.8    | Detected   | 358.7    | Detected   | Tbc1d31       | 1.005325112 | 0.97197309 | 1.02456441 | 0.9905741 |
| A_55_P1990 | 43511.9  | Detected | 35633.9  | Detected | 37069.3  | Detected   | 43743.6  | Detected   | Add1          | 1.00532498  | 0.85193476 | 1.22758385 | 1.0402819 |
| A_55_P2045 | 57       | Detected | 52.3     | Detected | 33.9     | Detected   | 57.3     | Detected   | Rsg1          | 1.005263158 | 0.59473684 | 1.09560229 | 0.6481836 |
| A_51_P1130 | 114.7    | Detected | 105.9    | Detected | 91.4     | Detected   | 115.3    | Detected   | Olfrl1131     | 1.005231037 | 0.79686138 | 1.08876298 | 0.8630784 |
| A_55_P1953 | 2526.9   | Detected | 2505.8   | Detected | 1947.6   | Detected   | 2540.1   | Detected   | Mafk          | 1.005223792 | 0.77074676 | 1.01368824 | 0.7772368 |
| A_55_P2188 | 134.2    | Detected | 128.9    | Detected | 100.7    | Detected   | 134.9    | Detected   | 4930405D01Rik | 1.005216095 | 0.75037258 | 1.04654771 | 0.7812258 |
| A_55_P2139 | 184246   | Detected | 180982.9 | Detected | 185320.4 | Detected   | 185201.9 | Detected   | Rpl11         | 1.005188172 | 1.00583133 | 1.02331159 | 1.0239664 |
| A_51_P3979 | 1436.6   | Detected | 1059.5   | Detected | 1010.1   | Detected   | 1444     | Detected   | Smap2         | 1.005151051 | 0.70311847 | 1.36290703 | 0.9533742 |
| A_55_P1967 | 3830.4   | Detected | 3388.6   | Detected | 3095.3   | Detected   | 3850.1   | Detected   | Tmem198       | 1.005143066 | 0.80808793 | 1.13619194 | 0.9134451 |
| A_55_P2144 | 38.9     | Detected | 26.7     | Detected | 46.6     | Detected   | 39.1     | Not Detect | Mmp24         | 1.005141388 | 1.19794344 | 1.46441948 | 1.7453184 |
| A_52_P8502 | 255.1    | Detected | 345.8    | Detected | 234.2    | Detected   | 256.4    | Detected   | Gadd45gip1    | 1.005096041 | 0.91807134 | 0.74146906 | 0.6772701 |
| A_52_P1001 | 926.8    | Detected | 880.6    | Detected | 882.3    | Detected   | 931.4    | Detected   | 4930503L19Rik | 1.004963315 | 0.95198533 | 1.05768794 | 1.0019305 |
| A_51_P4482 | 81878.3  | Detected | 85291.4  | Detected | 95849.5  | Detected   | 82278    | Detected   | Cnbp          | 1.004881635 | 1.17063373 | 0.96466936 | 1.1237886 |



|            |          |          |          |            |          |            |          |            |              |             |            |            |           |
|------------|----------|----------|----------|------------|----------|------------|----------|------------|--------------|-------------|------------|------------|-----------|
| A_51_P4242 | 2987.6   | Detected | 2101.9   | Detected   | 1840.3   | Detected   | 3001.9   | Detected   | Mecp2        | 1.004786451 | 0.61597938 | 1.42818402 | 0.8755412 |
| A_55_P1969 | 61360.5  | Detected | 58479.6  | Detected   | 67204.2  | Detected   | 61651.1  | Detected   | Cbx3         | 1.004735946 | 1.09523553 | 1.05423259 | 1.1491905 |
| A_55_P1973 | 11319.7  | Detected | 16336.6  | Detected   | 10269.6  | Detected   | 11373.3  | Detected   | Trmt61a      | 1.004735108 | 0.90723252 | 0.69618525 | 0.6286253 |
| A_55_P1972 | 3496.2   | Detected | 3183.7   | Detected   | 3748.8   | Detected   | 3512.7   | Detected   | Hist1h4c     | 1.00471941  | 1.07224987 | 1.10333888 | 1.1774979 |
| A_52_P4076 | 380801.4 | Detected | 335663.3 | Detected   | 401186.8 | Detected   | 382591.3 | Detected   | H2afj        | 1.00470035  | 1.05353289 | 1.13980676 | 1.195206  |
| A_55_P2192 | 21.3     | Detected | 10.5     | Not Detect | 18.1     | Not Detect | 21.4     | Not Detect | AW556556     | 1.004694836 | 0.84976526 | 2.03809524 | 1.7238095 |
| A_52_P4778 | 9963.3   | Detected | 6676.6   | Detected   | 9556     | Detected   | 10009.6  | Detected   | Hmox2        | 1.004647055 | 0.95911997 | 1.49920618 | 1.4312674 |
| A_55_P2065 | 315775   | Detected | 291806.3 | Detected   | 297108   | Detected   | 317221.5 | Detected   | Medag        | 1.004580793 | 0.94088512 | 1.08709613 | 1.0181686 |
| A_51_P4292 | 1720.4   | Detected | 1706.3   | Detected   | 1902.9   | Detected   | 1728.2   | Detected   | Fbxl6        | 1.004533829 | 1.10607998 | 1.01283479 | 1.1152201 |
| A_55_P2067 | 350040.4 | Detected | 358189.9 | Detected   | 388768   | Detected   | 351611.8 | Detected   | Fau          | 1.004489196 | 1.11063751 | 0.98163516 | 1.0853684 |
| A_55_P2078 | 37391.8  | Detected | 31595.1  | Detected   | 41370.1  | Detected   | 37558.1  | Detected   | H3f3a        | 1.004447499 | 1.10639498 | 1.1887318  | 1.3093834 |
| A_51_P4643 | 474.2    | Detected | 459.5    | Detected   | 144.3    | Detected   | 476.3    | Detected   | Gdf1         | 1.004428511 | 0.30430198 | 1.03656148 | 0.314037  |
| A_55_P1999 | 6073.1   | Detected | 6969.9   | Detected   | 5993.6   | Detected   | 6099.9   | Detected   | Dhx33        | 1.004412903 | 0.98690949 | 0.87517755 | 0.8599263 |
| A_66_P1283 | 4334.2   | Detected | 4052     | Detected   | 3863.6   | Detected   | 4353.3   | Detected   | Hdac1        | 1.004406811 | 0.89142172 | 1.07435834 | 0.9535044 |
| A_52_P6609 | 5626.5   | Detected | 3114.4   | Detected   | 4609.6   | Detected   | 5651     | Detected   | Dock1        | 1.004354394 | 0.81926597 | 1.8144747  | 1.4800925 |
| A_55_P2168 | 55728.8  | Detected | 51226.4  | Detected   | 63600.2  | Detected   | 55967.5  | Detected   | Atp5k        | 1.004283243 | 1.14124474 | 1.09255189 | 1.2415512 |
| A_66_P1067 | 23.5     | Detected | 29.8     | Detected   | 25.1     | Detected   | 23.6     | Not Detect | Lhfpl3       | 1.004255319 | 1.06808511 | 0.79194631 | 0.8422819 |
| A_52_P5043 | 9953.4   | Detected | 8770.7   | Detected   | 9338.6   | Detected   | 9995.6   | Detected   | Pmpca        | 1.004239757 | 0.93823216 | 1.13965818 | 1.0647497 |
| A_55_P2027 | 24       | Detected | 11.9     | Not Detect | 21.3     | Detected   | 24.1     | Not Detect | Gm9902       | 1.004166667 | 0.8875     | 2.02521008 | 1.789916  |
| A_55_P2142 | 35188.1  | Detected | 23839.2  | Detected   | 41962.7  | Detected   | 35334.5  | Detected   | Ninj1        | 1.004160497 | 1.19252531 | 1.48220158 | 1.7602394 |
| A_52_P6138 | 1106.9   | Detected | 878.9    | Detected   | 1076.8   | Detected   | 1111.5   | Detected   | Zbtb7a       | 1.00415575  | 0.97280694 | 1.26464899 | 1.2251678 |
| A_55_P2059 | 73       | Detected | 93.6     | Detected   | 88.9     | Detected   | 73.3     | Detected   | Cd101        | 1.004109589 | 1.21780822 | 0.78311966 | 0.9497863 |
| A_55_P2087 | 98.6     | Detected | 81.2     | Detected   | 76.3     | Detected   | 99       | Detected   | Pecam1       | 1.004056795 | 0.77383367 | 1.21921182 | 0.9396552 |
| A_55_P2020 | 89464.5  | Detected | 60718.3  | Detected   | 96887.4  | Detected   | 89827.2  | Detected   | Usp50        | 1.004054122 | 1.08297034 | 1.47940901 | 1.595687  |
| A_55_P2192 | 175.5    | Detected | 150.9    | Detected   | 169.9    | Detected   | 176.2    | Detected   | H2bfm        | 1.003988604 | 0.96809117 | 1.1676607  | 1.1259112 |
| A_55_P2021 | 891.6    | Detected | 742.3    | Detected   | 839.3    | Detected   | 895.1    | Detected   | Gm16386      | 1.003925527 | 0.94134141 | 1.20584669 | 1.1306749 |
| A_66_P1394 | 1133     | Detected | 974.5    | Detected   | 1007.3   | Detected   | 1137.4   | Detected   | Mia3         | 1.003883495 | 0.8890556  | 1.16716265 | 1.0336583 |
| A_55_P2125 | 12599.5  | Detected | 10033.2  | Detected   | 11524.9  | Detected   | 12648    | Detected   | Gm10731      | 1.003849359 | 0.9147109  | 1.26061476 | 1.1486764 |
| A_55_P2159 | 3716.4   | Detected | 4133.5   | Detected   | 3853.8   | Detected   | 3730.3   | Detected   | Polr1e       | 1.003740179 | 1.03697126 | 0.90245555 | 0.9323334 |
| A_55_P1983 | 160944.7 | Detected | 100333.6 | Detected   | 181732.9 | Detected   | 161537.3 | Detected   | Ftl1         | 1.00368201  | 1.12916362 | 1.61000203 | 1.8112865 |
| A_51_P3937 | 15096.2  | Detected | 14477.6  | Detected   | 16923.7  | Detected   | 15150.7  | Detected   | Ndufs2       | 1.00361018  | 1.12105695 | 1.04649251 | 1.1689576 |
| A_51_P4695 | 56388.8  | Detected | 49277.3  | Detected   | 67266.5  | Detected   | 56588.9  | Detected   | Psma1        | 1.003548577 | 1.19290533 | 1.14837664 | 1.3650606 |
| A_55_P2034 | 2706.6   | Detected | 2227     | Detected   | 2347.4   | Detected   | 2716.2   | Detected   | Gtf3c1       | 1.003546885 | 0.86728737 | 1.21966771 | 1.0540638 |
| A_55_P2144 | 81652.7  | Detected | 81337.3  | Detected   | 71826.3  | Detected   | 81937.6  | Detected   | Prpsap1      | 1.003489168 | 0.87965615 | 1.00738038 | 0.8830672 |
| A_51_P2124 | 1691.9   | Detected | 1677.2   | Detected   | 1415.9   | Detected   | 1697.8   | Detected   | Lrrc41       | 1.003487204 | 0.83686979 | 1.01228238 | 0.8442046 |
| A_55_P2185 | 258.9    | Detected | 195.1    | Detected   | 78.7     | Detected   | 259.8    | Detected   | Bcl7a        | 1.003476246 | 0.30397837 | 1.33162481 | 0.4033829 |
| A_55_P2048 | 310633.5 | Detected | 279357.5 | Detected   | 335070   | Detected   | 311671   | Detected   | Gm4786       | 1.003339949 | 1.07866666 | 1.11567078 | 1.1994308 |
| A_55_P2101 | 386998.8 | Detected | 374804.2 | Detected   | 394672.3 | Detected   | 388283.2 | Detected   | Rpl10a       | 1.003318873 | 1.01982823 | 1.03596278 | 1.0530093 |
| A_55_P1985 | 91888.5  | Detected | 98082.7  | Detected   | 92384.8  | Detected   | 92192.4  | Detected   | LOC101055799 | 1.003307269 | 1.00540111 | 0.93994558 | 0.9419072 |
| A_51_P3796 | 7802.3   | Detected | 7472.1   | Detected   | 6036.4   | Detected   | 7827.9   | Detected   | Mlit11       | 1.003281084 | 0.7736693  | 1.04761714 | 0.8078586 |

|            |          |          |          |          |          |          |          |            |              |             |            |            |           |
|------------|----------|----------|----------|----------|----------|----------|----------|------------|--------------|-------------|------------|------------|-----------|
| A_52_P5922 | 707.2    | Detected | 538.7    | Detected | 678.9    | Detected | 709.5    | Detected   | Zswim3       | 1.003252262 | 0.95998303 | 1.31705959 | 1.2602562 |
| A_55_P2312 | 4365.1   | Detected | 2863.6   | Detected | 3918.7   | Detected | 4379.2   | Detected   | LOC101056152 | 1.003230167 | 0.8977343  | 1.52926386 | 1.3684523 |
| A_55_P1959 | 13602.1  | Detected | 13310.4  | Detected | 13146.8  | Detected | 13646    | Detected   | Tmem222      | 1.003227443 | 0.96652723 | 1.02521337 | 0.9877089 |
| A_51_P4202 | 5537.1   | Detected | 5058.4   | Detected | 5044.7   | Detected | 5554.6   | Detected   | Srrt         | 1.003160499 | 0.91107258 | 1.09809426 | 0.9972916 |
| A_65_P1002 | 31.7     | Detected | 60       | Detected | 29.1     | Detected | 31.8     | Not Detect | Prdm2        | 1.003154574 | 0.91798107 | 0.53       | 0.485     |
| A_55_P2066 | 989.1    | Detected | 1551.7   | Detected | 685.2    | Detected | 992.2    | Detected   | Prmt6        | 1.003134162 | 0.69275099 | 0.63942772 | 0.4415802 |
| A_51_P3813 | 48609.7  | Detected | 44345.8  | Detected | 47544.1  | Detected | 48760.9  | Detected   | Ddx17        | 1.00311049  | 0.97807845 | 1.09956073 | 1.0721218 |
| A_55_P1964 | 3352.4   | Detected | 2705.9   | Detected | 3468.8   | Detected | 3362.8   | Detected   | Srsf1        | 1.003102255 | 1.03472139 | 1.24276581 | 1.2819395 |
| A_55_P1988 | 871.4    | Detected | 1087     | Detected | 581.1    | Detected | 874.1    | Detected   | Rnf183       | 1.003098462 | 0.66685793 | 0.80413983 | 0.5345906 |
| A_55_P1970 | 196893.1 | Detected | 170960.4 | Detected | 210659.2 | Detected | 197499.3 | Detected   | Rpl35a       | 1.003078828 | 1.06991662 | 1.15523419 | 1.2322105 |
| A_52_P3438 | 1775.4   | Detected | 1828.4   | Detected | 2326.1   | Detected | 1780.8   | Detected   | Creb3l2      | 1.003041568 | 1.31018362 | 0.97396631 | 1.2722052 |
| A_51_P2932 | 1583     | Detected | 1712.6   | Detected | 1323.4   | Detected | 1587.8   | Detected   | Pde7a        | 1.003032217 | 0.83600758 | 0.92712834 | 0.7727432 |
| A_55_P1989 | 2830     | Detected | 1590.8   | Detected | 2889.8   | Detected | 2838.4   | Detected   | Tsc22d3      | 1.002968198 | 1.02113074 | 1.78425949 | 1.8165703 |
| A_51_P4076 | 15033.8  | Detected | 19267.5  | Detected | 14378.3  | Detected | 15078.3  | Detected   | Spl2b        | 1.002959997 | 0.95639825 | 0.78257688 | 0.7462463 |
| A_55_P2004 | 236.7    | Detected | 194.2    | Detected | 326.8    | Detected | 237.4    | Detected   | Hexim2       | 1.00295733  | 1.38065061 | 1.22245108 | 1.6828012 |
| A_55_P1960 | 34.2     | Detected | 31.4     | Detected | 25.5     | Detected | 34.3     | Not Detect | Atp8b3       | 1.002923977 | 0.74561404 | 1.09235669 | 0.8121019 |
| A_52_P6258 | 515.6    | Detected | 597.1    | Detected | 506.5    | Detected | 517.1    | Detected   | Sf3b1        | 1.002909232 | 0.98235066 | 0.86601909 | 0.8482666 |
| A_52_P5032 | 584.5    | Detected | 647      | Detected | 468.5    | Detected | 586.2    | Detected   | Tmem110      | 1.002908469 | 0.80153978 | 0.90602782 | 0.7241113 |
| A_55_P1989 | 34.5     | Detected | 26.3     | Detected | 18.3     | Detected | 34.6     | Not Detect | Chml         | 1.002898551 | 0.53043478 | 1.31558935 | 0.6958175 |
| A_55_P1959 | 34.5     | Detected | 67.9     | Detected | 26.9     | Detected | 34.6     | Not Detect | Gm13119      | 1.002898551 | 0.77971014 | 0.5095729  | 0.3961708 |
| A_55_P2018 | 6873     | Detected | 5722.1   | Detected | 8927.3   | Detected | 6892.9   | Detected   | Cep19        | 1.002895388 | 1.29889422 | 1.2046102  | 1.560144  |
| A_55_P2131 | 139      | Detected | 127.3    | Detected | 115.8    | Detected | 139.4    | Detected   | Gm10785      | 1.002877698 | 0.83309353 | 1.09505106 | 0.9096622 |
| A_55_P2000 | 175704.6 | Detected | 159266.8 | Detected | 195829.8 | Detected | 176203.3 | Detected   | Cfl1         | 1.002838287 | 1.11453997 | 1.10634043 | 1.2295708 |
| A_52_P5278 | 1663.4   | Detected | 1868.7   | Detected | 1946.1   | Detected | 1668.1   | Detected   | Rrp12        | 1.002825538 | 1.16995311 | 0.89265265 | 1.0414192 |
| A_51_P3595 | 71.4     | Detected | 70.9     | Detected | 53.5     | Detected | 71.6     | Detected   | Rtn4r12      | 1.00280112  | 0.74929972 | 1.00987306 | 0.7545839 |
| A_51_P2918 | 44528.6  | Detected | 33441    | Detected | 52548.4  | Detected | 44649.3  | Detected   | Cox14        | 1.002710617 | 1.18010447 | 1.33516641 | 1.5713765 |
| A_55_P1961 | 15350.4  | Detected | 13739.7  | Detected | 18010.8  | Detected | 15391.9  | Detected   | Bnip3l       | 1.002703513 | 1.17331144 | 1.12025008 | 1.3108583 |
| A_51_P1411 | 755.5    | Detected | 783.3    | Detected | 755.5    | Detected | 757.5    | Detected   | Med18        | 1.002647253 | 1          | 0.96706243 | 0.9645091 |
| A_51_P2269 | 78.2     | Detected | 73.8     | Detected | 72.3     | Detected | 78.4     | Detected   | Capn15       | 1.002557545 | 0.92455243 | 1.06233062 | 0.9796748 |
| A_55_P1953 | 117.6    | Detected | 142      | Detected | 120.5    | Detected | 117.9    | Detected   | Cdkl3        | 1.00255102  | 1.02465986 | 0.83028169 | 0.8485915 |
| A_55_P1969 | 355.2    | Detected | 307.9    | Detected | 360.5    | Detected | 356.1    | Detected   | Pdhb         | 1.002533784 | 1.01492117 | 1.15654433 | 1.1708347 |
| A_55_P2018 | 79.2     | Detected | 73.4     | Detected | 57.7     | Detected | 79.4     | Detected   | Crlf2        | 1.002525253 | 0.72853535 | 1.08174387 | 0.7861035 |
| A_55_P2076 | 127280.4 | Detected | 109849.5 | Detected | 134562.4 | Detected | 127600.7 | Detected   | Hspa5        | 1.002516491 | 1.05721227 | 1.16159564 | 1.2249705 |
| A_55_P2097 | 4932.4   | Detected | 3944.2   | Detected | 4119.2   | Detected | 4944.6   | Detected   | Zfp131       | 1.002473441 | 0.83513097 | 1.25363825 | 1.0443689 |
| A_55_P2035 | 2404.2   | Detected | 1437     | Detected | 1404.3   | Detected | 2409.9   | Detected   | Zbtb20       | 1.002370851 | 0.58410282 | 1.67703549 | 0.9772443 |
| A_55_P2043 | 21401.8  | Detected | 15782.9  | Detected | 21379.1  | Detected | 21452.4  | Detected   | Ubac1        | 1.002364287 | 0.99893934 | 1.35921789 | 1.3545736 |
| A_51_P5146 | 4723.3   | Detected | 6981.5   | Detected | 4591.2   | Detected | 4734.1   | Detected   | Zcchc10      | 1.002286537 | 0.97203227 | 0.6780921  | 0.6576237 |
| A_51_P3274 | 6275.3   | Detected | 6149.4   | Detected | 6156.3   | Detected | 6289.5   | Detected   | Rsrc2        | 1.00226284  | 0.98103676 | 1.02278271 | 1.0011221 |
| A_52_P7534 | 1906.5   | Detected | 2125.4   | Detected | 1441.5   | Detected | 1910.8   | Detected   | Spdl1        | 1.002255442 | 0.75609756 | 0.89903077 | 0.6782253 |
| A_55_P1953 | 1161.7   | Detected | 2772.9   | Detected | 689.7    | Detected | 1164.3   | Detected   | Nudt7        | 1.002238099 | 0.59369889 | 0.41988532 | 0.2487288 |

|            |         |          |         |            |         |            |         |            |          |             |            |            |           |
|------------|---------|----------|---------|------------|---------|------------|---------|------------|----------|-------------|------------|------------|-----------|
| A_52_P1425 | 46      | Detected | 54.1    | Detected   | 50.8    | Detected   | 46.1    | Detected   | Tex2     | 1.002173913 | 1.10434783 | 0.85212569 | 0.9390018 |
| A_55_P2145 | 138.1   | Detected | 123.3   | Detected   | 90.5    | Detected   | 138.4   | Detected   | Pex5l    | 1.002172339 | 0.65532223 | 1.12246553 | 0.7339822 |
| A_51_P1721 | 19199.4 | Detected | 15540.9 | Detected   | 18309.6 | Detected   | 19239.3 | Detected   | Lurap1l  | 1.00207819  | 0.9536548  | 1.2379785  | 1.1781557 |
| A_55_P2118 | 3871.3  | Detected | 4796.1  | Detected   | 5360.6  | Detected   | 3879.3  | Detected   | Rnmt     | 1.002066489 | 1.38470281 | 0.80884469 | 1.1176998 |
| A_55_P2126 | 13696.2 | Detected | 9955.8  | Detected   | 9552.6  | Detected   | 13723.6 | Detected   | Wdr81    | 1.002000555 | 0.69746353 | 1.37845276 | 0.959501  |
| A_55_P2187 | 1617.1  | Detected | 1399.8  | Detected   | 1346.8  | Detected   | 1620.2  | Detected   | Tpm1     | 1.001917012 | 0.83284893 | 1.15745106 | 0.9621374 |
| A_55_P1977 | 368.2   | Detected | 306.1   | Detected   | 295.4   | Detected   | 368.9   | Detected   | Slc22a13 | 1.001901141 | 0.80228137 | 1.20516171 | 0.9650441 |
| A_55_P2059 | 7036.9  | Detected | 7598.4  | Detected   | 7397.3  | Detected   | 7049.8  | Detected   | Atpaf2   | 1.001833194 | 1.05121573 | 0.92780059 | 0.9735339 |
| A_55_P2074 | 712.3   | Detected | 576.3   | Detected   | 629.5   | Detected   | 713.6   | Detected   | Ube4b    | 1.001825074 | 0.88375684 | 1.23824397 | 1.092313  |
| A_55_P2039 | 15355.1 | Detected | 16147.1 | Detected   | 10594.2 | Detected   | 15379.6 | Detected   | Zswim8   | 1.001595561 | 0.68994666 | 0.95246825 | 0.6561054 |
| A_66_P1379 | 125.5   | Detected | 101     | Detected   | 106.1   | Detected   | 125.7   | Detected   | Rbm3os   | 1.001593625 | 0.84541833 | 1.24455446 | 1.050495  |
| A_55_P1990 | 6065.5  | Detected | 4859.8  | Detected   | 5831.2  | Detected   | 6075.1  | Detected   | Cox18    | 1.001582722 | 0.96137169 | 1.25007202 | 1.1998848 |
| A_55_P2018 | 257     | Detected | 229.8   | Detected   | 352.8   | Detected   | 257.4   | Detected   | Bivm     | 1.00155642  | 1.37276265 | 1.12010444 | 1.535248  |
| A_55_P2109 | 324     | Detected | 223.6   | Detected   | 248.7   | Detected   | 324.5   | Detected   | Shb      | 1.00154321  | 0.76759259 | 1.45125224 | 1.112254  |
| A_66_P1054 | 131.7   | Detected | 76.9    | Detected   | 92.8    | Detected   | 131.9   | Detected   | Ccdc14   | 1.001518603 | 0.70463174 | 1.71521456 | 1.206762  |
| A_55_P2062 | 3982.5  | Detected | 4240.1  | Detected   | 2848    | Detected   | 3988.1  | Detected   | E2f7     | 1.001406152 | 0.71512869 | 0.94056744 | 0.6716823 |
| A_52_P3915 | 3656.5  | Detected | 3194.9  | Detected   | 3517.7  | Detected   | 3661.6  | Detected   | Bmi1     | 1.001394776 | 0.9620402  | 1.14607656 | 1.101036  |
| A_52_P1791 | 8538.6  | Detected | 6940    | Detected   | 9522.8  | Detected   | 8548.9  | Detected   | Bend3    | 1.001206287 | 1.1152648  | 1.23182997 | 1.3721614 |
| A_55_P1964 | 9943.6  | Detected | 7846.3  | Detected   | 11519.4 | Detected   | 9955.2  | Detected   | Opa1     | 1.00116658  | 1.15847379 | 1.26877637 | 1.4681315 |
| A_51_P3474 | 10322.9 | Detected | 8104.2  | Detected   | 7522.2  | Detected   | 10334.8 | Detected   | Htatsf1  | 1.001152777 | 0.72869058 | 1.27524    | 0.9281854 |
| A_55_P2056 | 1187.7  | Detected | 988     | Detected   | 970.1   | Detected   | 1189    | Detected   | Gpr3     | 1.001094552 | 0.81678875 | 1.2034413  | 0.9818826 |
| A_55_P2050 | 380.9   | Detected | 308.7   | Detected   | 394.9   | Detected   | 381.3   | Detected   | Slc29a3  | 1.001050144 | 1.03675505 | 1.23517979 | 1.2792355 |
| A_55_P1976 | 2257.6  | Detected | 1497.1  | Detected   | 2244    | Detected   | 2259.8  | Detected   | Cnih4    | 1.000974486 | 0.9939759  | 1.50945161 | 1.4988979 |
| A_51_P4830 | 4857.8  | Detected | 4523.1  | Detected   | 4597.3  | Detected   | 4862.1  | Detected   | Arel1    | 1.000885174 | 0.9463749  | 1.0749486  | 1.0164047 |
| A_55_P2160 | 11143.4 | Detected | 10801.9 | Detected   | 10461.1 | Detected   | 11152.5 | Detected   | Set      | 1.000816627 | 0.93877093 | 1.03245725 | 0.96845   |
| A_55_P2060 | 2009.1  | Detected | 2499.9  | Detected   | 1259    | Detected   | 2010.6  | Detected   | Hoxa3    | 1.000746603 | 0.62664875 | 0.80427217 | 0.5036201 |
| A_55_P2042 | 13210.9 | Detected | 11205.1 | Detected   | 11673.9 | Detected   | 13219.7 | Detected   | Ctdnep1  | 1.000666117 | 0.88365668 | 1.17979313 | 1.0418381 |
| A_51_P1418 | 4197    | Detected | 3944.1  | Detected   | 3555    | Detected   | 4199.4  | Detected   | Ube3c    | 1.000571837 | 0.8470336  | 1.0647296  | 0.9013463 |
| A_55_P1998 | 244     | Detected | 170.4   | Detected   | 171     | Detected   | 244.1   | Detected   | Brwd1    | 1.000409836 | 0.70081967 | 1.43251174 | 1.0035211 |
| A_52_P6058 | 11087.9 | Detected | 8027.2  | Detected   | 12271.8 | Detected   | 11092.4 | Detected   | Tm9sf3   | 1.000405848 | 1.10677405 | 1.3818517  | 1.5287772 |
| A_51_P3393 | 268.4   | Detected | 342     | Detected   | 370.5   | Detected   | 268.5   | Detected   | Setmar   | 1.000372578 | 1.38040238 | 0.78508772 | 1.0833333 |
| A_51_P1305 | 2244.4  | Detected | 2352.4  | Detected   | 1595.3  | Detected   | 2244.6  | Detected   | Gas5     | 1.000089111 | 0.7107913  | 0.95417446 | 0.6781585 |
| A_55_P2163 | 18.5    | Detected | 13.4    | Not Detect | 31.1    | Detected   | 18.5    | Not Detect | Gm10220  | 1           | 1.68108108 | 1.38059701 | 2.3208955 |
| A_66_P1354 | 44.1    | Detected | 34.1    | Detected   | 20.4    | Detected   | 44.1    | Not Detect | Gm9099   | 1           | 0.46258503 | 1.29325513 | 0.5982405 |
| A_52_P3338 | 19.9    | Detected | 15.9    | Detected   | 14.3    | Not Detect | 19.9    | Not Detect | Tas2r118 | 1           | 0.71859296 | 1.25157233 | 0.8993711 |
| A_55_P2104 | 24.4    | Detected | 19.8    | Detected   | 22.9    | Detected   | 24.4    | Not Detect | Gm3317   | 1           | 0.93852459 | 1.23232323 | 1.1565657 |
| A_55_P2020 | 66.5    | Detected | 54.2    | Detected   | 69.4    | Detected   | 66.5    | Detected   | Madcam1  | 1           | 1.04360902 | 1.22693727 | 1.2804428 |
| A_55_P1985 | 24.8    | Detected | 20.6    | Detected   | 13.4    | Not Detect | 24.8    | Not Detect | Usp27x   | 1           | 0.54032258 | 1.2038835  | 0.6504854 |
| A_55_P2242 | 20      | Detected | 16.8    | Detected   | 17.8    | Detected   | 20      | Not Detect | Cog5     | 1           | 0.89       | 1.19047619 | 1.0595238 |
| A_55_P2158 | 15.3    | Detected | 17.9    | Detected   | 11.2    | Not Detect | 15.3    | Not Detect | Prob1    | 1           | 0.73202614 | 0.8547486  | 0.6256983 |

|            |                   |                   |                   |                   |               |             |            |            |           |
|------------|-------------------|-------------------|-------------------|-------------------|---------------|-------------|------------|------------|-----------|
| A_55_P2093 | 64.2 Detected     | 76 Detected       | 72 Detected       | 64.2 Detected     | Rnf151        | 1           | 1.12149533 | 0.84473684 | 0.9473684 |
| A_55_P2148 | 25.8 Detected     | 34.8 Detected     | 19.9 Detected     | 25.8 Not Detect   | A430060F13Rik | 1           | 0.77131783 | 0.74137931 | 0.5718391 |
| A_55_P2298 | 98.3 Detected     | 139.8 Detected    | 103.4 Detected    | 98.3 Detected     | Trmt10a       | 1           | 1.05188199 | 0.70314735 | 0.739628  |
| A_55_P2181 | 13.6 Not Detect   | 20.8 Detected     | 13.2 Not Detect   | 13.6 Not Detect   | 1700018C11Rik | 1           | 0.97058824 | 0.65384615 | 0.6346154 |
| A_55_P2103 | 122.1 Detected    | 188.5 Detected    | 31.4 Detected     | 122.1 Detected    | Sema3d        | 1           | 0.25716626 | 0.64774536 | 0.1665782 |
| A_55_P2181 | 16.6 Detected     | 26.7 Detected     | 13.2 Not Detect   | 16.6 Not Detect   | Sult1d1       | 1           | 0.79518072 | 0.62172285 | 0.494382  |
| A_55_P2084 | 29.9 Detected     | 54.7 Detected     | 21.7 Detected     | 29.9 Not Detect   | Adc           | 1           | 0.72575251 | 0.54661792 | 0.3967093 |
| A_52_P3141 | 11.1 Not Detect   | 21.4 Detected     | 18.6 Detected     | 11.1 Not Detect   | 3110054G05Rik | 1           | 1.67567568 | 0.51869159 | 0.8691589 |
| A_55_P2149 | 497748.2 Detected | 452993.6 Detected | 527846.9 Detected | 497742.9 Detected | Rpl35         | 0.999989352 | 1.06046973 | 1.09878572 | 1.1652414 |
| A_51_P1857 | 972.5 Detected    | 953.8 Detected    | 1305.5 Detected   | 972.4 Detected    | Ptdss2        | 0.999897172 | 1.34241645 | 1.01950094 | 1.3687356 |
| A_51_P4786 | 7333.8 Detected   | 5585.1 Detected   | 7105.3 Detected   | 7332.9 Detected   | Samd10        | 0.999877281 | 0.96884289 | 1.31293979 | 1.2721885 |
| A_55_P2209 | 5334 Detected     | 4522.5 Detected   | 4209.1 Detected   | 5333.3 Detected   | 2610002J23Rik | 0.999868766 | 0.78910761 | 1.17928137 | 0.930702  |
| A_52_P2269 | 718.3 Detected    | 714.8 Detected    | 596.4 Detected    | 718.1 Detected    | Cflar         | 0.999721565 | 0.83029375 | 1.00461668 | 0.8343593 |
| A_55_P2110 | 1907.3 Detected   | 1714.5 Detected   | 1703.1 Detected   | 1906.7 Detected   | Trip12        | 0.999685419 | 0.89293766 | 1.11210265 | 0.9933508 |
| A_51_P2847 | 3730.5 Detected   | 4306.5 Detected   | 3333.1 Detected   | 3729.1 Detected   | Ints12        | 0.999624715 | 0.89347272 | 0.8659236  | 0.7739696 |
| A_55_P1980 | 89202 Detected    | 80003.7 Detected  | 93323 Detected    | 89165.1 Detected  | Ndufb11       | 0.999586332 | 1.04619852 | 1.1145122  | 1.1664836 |
| A_55_P2084 | 10485.8 Detected  | 10662.1 Detected  | 10128.5 Detected  | 10480.3 Detected  | BC017643      | 0.999475481 | 0.96592535 | 0.98294895 | 0.9499536 |
| A_51_P3782 | 181.1 Detected    | 135.3 Detected    | 121.2 Detected    | 181 Detected      | Guca2a        | 0.999447819 | 0.66924351 | 1.33776792 | 0.8957871 |
| A_55_P1977 | 6156.7 Detected   | 5833 Detected     | 5295.9 Detected   | 6153 Detected     | Ogfod2        | 0.999399029 | 0.86018484 | 1.05486028 | 0.9079205 |
| A_55_P2051 | 159.9 Detected    | 88.8 Detected     | 153.3 Detected    | 159.8 Detected    | D2hgdh        | 0.999374609 | 0.9587242  | 1.79954955 | 1.7263514 |
| A_55_P2121 | 45493.6 Detected  | 36006.5 Detected  | 36445.9 Detected  | 45464.6 Detected  | Nudcd3        | 0.999362548 | 0.80112148 | 1.26267757 | 1.0122034 |
| A_55_P2032 | 1939.3 Detected   | 1976.3 Detected   | 2531.3 Detected   | 1938 Detected     | Tomm40l       | 0.999329655 | 1.30526479 | 0.98062035 | 1.2808278 |
| A_51_P3185 | 5322.7 Detected   | 8124.5 Detected   | 5385.6 Detected   | 5319.1 Detected   | Nle1          | 0.999323652 | 1.01181731 | 0.65469875 | 0.6628839 |
| A_55_P2031 | 36831.4 Detected  | 18240.6 Detected  | 36231.9 Detected  | 36804.2 Detected  | Gstp1         | 0.9992615   | 0.98372313 | 2.01770775 | 1.9863327 |
| A_51_P3795 | 36599.9 Detected  | 35787 Detected    | 42106.8 Detected  | 36572.1 Detected  | Ndufs1        | 0.999240435 | 1.15046216 | 1.02193813 | 1.1765949 |
| A_55_P2007 | 4283.3 Detected   | 3702.8 Detected   | 4354.2 Detected   | 4279.8 Detected   | Elf2          | 0.999182873 | 1.01655266 | 1.15582802 | 1.1759209 |
| A_55_P2116 | 115.6 Detected    | 85.4 Detected     | 117.9 Detected    | 115.5 Detected    | Mrgprf        | 0.999134948 | 1.01989619 | 1.35245902 | 1.3805621 |
| A_55_P2210 | 343.5 Detected    | 523.7 Detected    | 310.4 Detected    | 343.2 Detected    | 4732423E21Rik | 0.999126638 | 0.90363901 | 0.65533703 | 0.5927057 |
| A_66_P1369 | 434.9 Detected    | 464.5 Detected    | 405.2 Detected    | 434.5 Detected    | Med14         | 0.999080248 | 0.93170844 | 0.93541442 | 0.8723358 |
| A_66_P1309 | 15585.7 Detected  | 16933.1 Detected  | 15281.1 Detected  | 15570.9 Detected  | Psmd11        | 0.999050412 | 0.98045644 | 0.91955401 | 0.9024396 |
| A_55_P2123 | 658.5 Detected    | 431.3 Detected    | 540.2 Detected    | 657.8 Detected    | Tug1          | 0.998936978 | 0.82034928 | 1.5251565  | 1.2524925 |
| A_51_P2088 | 4583.2 Detected   | 4244.4 Detected   | 6585 Detected     | 4578.2 Detected   | Ndufab1       | 0.998909059 | 1.43676907 | 1.0786448  | 1.551456  |
| A_52_P1521 | 16256.2 Detected  | 13509.7 Detected  | 17652.5 Detected  | 16238.4 Detected  | Ctbp2         | 0.998905033 | 1.08589338 | 1.2019808  | 1.3066537 |
| A_51_P2375 | 10377.5 Detected  | 11027.8 Detected  | 8761.2 Detected   | 10365.4 Detected  | Akirin1       | 0.998834016 | 0.84424958 | 0.93993362 | 0.7944649 |
| A_55_P2069 | 506.8 Detected    | 485.5 Detected    | 400.3 Detected    | 506.2 Detected    | Mtf1          | 0.998816101 | 0.78985793 | 1.04263646 | 0.8245108 |
| A_55_P2028 | 1139.5 Detected   | 899 Detected      | 1142.1 Detected   | 1138.1 Detected   | Ate1          | 0.998771391 | 1.0022817  | 1.26596218 | 1.2704116 |
| A_55_P1970 | 80.7 Detected     | 74.8 Detected     | 79.8 Detected     | 80.6 Detected     | Dgkh          | 0.998760843 | 0.98884758 | 1.07754011 | 1.0668449 |
| A_55_P2107 | 777.5 Detected    | 598.9 Detected    | 649 Detected      | 776.5 Detected    | Mcm8          | 0.998713826 | 0.83472669 | 1.29654366 | 1.0836534 |
| A_55_P1975 | 9611.4 Detected   | 11045.8 Detected  | 11441.2 Detected  | 9598.9 Detected   | Pnpt1         | 0.998699461 | 1.19037809 | 0.86900904 | 1.0357964 |
| A_55_P2015 | 994.9 Detected    | 856.8 Detected    | 888.3 Detected    | 993.6 Detected    | E430024I08Rik | 0.998693336 | 0.89285355 | 1.15966387 | 1.0367647 |

|            |          |          |          |            |          |          |          |            |               |             |            |            |           |
|------------|----------|----------|----------|------------|----------|----------|----------|------------|---------------|-------------|------------|------------|-----------|
| A_55_P1968 | 337428.3 | Detected | 329948.8 | Detected   | 321477.7 | Detected | 336980.3 | Detected   | Rpl10         | 0.998672311 | 0.95272892 | 1.02131088 | 0.974326  |
| A_55_P2404 | 958.9    | Detected | 971.6    | Detected   | 1024.7   | Detected | 957.6    | Detected   | Rbm27         | 0.99864428  | 1.06862029 | 0.98559078 | 1.0546521 |
| A_51_P2093 | 4972     | Detected | 5520.1   | Detected   | 5152.5   | Detected | 4965.1   | Detected   | Polr1e        | 0.998612228 | 1.0363033  | 0.89945834 | 0.933407  |
| A_55_P1981 | 5698.1   | Detected | 4507.9   | Detected   | 6238.7   | Detected | 5690     | Detected   | Thap7         | 0.998578474 | 1.09487373 | 1.26222853 | 1.3839482 |
| A_55_P2425 | 2078.4   | Detected | 990.8    | Detected   | 1366.5   | Detected | 2075.3   | Detected   | D030036P13Rik | 0.998508468 | 0.65747691 | 2.09457004 | 1.3791885 |
| A_55_P2013 | 259.8    | Detected | 228.3    | Detected   | 240.9    | Detected | 259.4    | Detected   | Paip1         | 0.998460354 | 0.92725173 | 1.13622427 | 1.0551905 |
| A_55_P1977 | 9430.8   | Detected | 6909.3   | Detected   | 13135.4  | Detected | 9416     | Detected   | Pigp          | 0.998430674 | 1.39281927 | 1.36280086 | 1.9011188 |
| A_55_P2031 | 946      | Detected | 662.6    | Detected   | 769.9    | Detected | 944.5    | Detected   | Usp47         | 0.998414376 | 0.81384778 | 1.42544522 | 1.1619378 |
| A_52_P4560 | 10587.7  | Detected | 10775.6  | Detected   | 12134.9  | Detected | 10570.7  | Detected   | Commd2        | 0.998394363 | 1.14613183 | 0.98098482 | 1.1261461 |
| A_51_P1765 | 24256.4  | Detected | 27244.6  | Detected   | 25705.6  | Detected | 24216.8  | Detected   | Rps19bp1      | 0.998367441 | 1.05974506 | 0.88886605 | 0.9435117 |
| A_66_P1387 | 907.3    | Detected | 822.1    | Detected   | 958.5    | Detected | 905.8    | Detected   | Usp19         | 0.998346743 | 1.05643117 | 1.10181243 | 1.1659166 |
| A_55_P1998 | 19455.9  | Detected | 15940.8  | Detected   | 19002.4  | Detected | 19422.8  | Detected   | Wsb2          | 0.998298717 | 0.97669088 | 1.2184332  | 1.1920606 |
| A_52_P3141 | 523.1    | Detected | 671.2    | Detected   | 344.8    | Detected | 522.2    | Detected   | Pkia          | 0.998279488 | 0.65914739 | 0.77800954 | 0.5137068 |
| A_55_P2020 | 1966     | Detected | 2125.9   | Detected   | 2279     | Detected | 1962.6   | Detected   | Snx6          | 0.9982706   | 1.15920651 | 0.92318547 | 1.0720166 |
| A_55_P2044 | 113.8    | Detected | 136.8    | Detected   | 140.6    | Detected | 113.6    | Detected   | Rsph1         | 0.998242531 | 1.23550088 | 0.83040936 | 1.0277778 |
| A_55_P2080 | 56.6     | Detected | 46.7     | Detected   | 44.1     | Detected | 56.5     | Detected   | Olfir704      | 0.998233216 | 0.77915194 | 1.20985011 | 0.9443255 |
| A_51_P1130 | 22898.1  | Detected | 18756.8  | Detected   | 27896.1  | Detected | 22857.6  | Detected   | Cdc123        | 0.998231294 | 1.21827138 | 1.21863004 | 1.4872526 |
| A_55_P1989 | 108708.6 | Detected | 105831.4 | Detected   | 129824.3 | Detected | 108490.1 | Detected   | Ddb1          | 0.997990039 | 1.1942413  | 1.02512203 | 1.2267087 |
| A_51_P1818 | 49.2     | Detected | 62.9     | Detected   | 44.2     | Detected | 49.1     | Detected   | Tmem38b       | 0.99796748  | 0.89837398 | 0.78060413 | 0.7027027 |
| A_55_P2165 | 422      | Detected | 223.4    | Detected   | 353.9    | Detected | 421.1    | Detected   | Abl1          | 0.997867299 | 0.83862559 | 1.88495971 | 1.584154  |
| A_51_P4511 | 184.9    | Detected | 88.7     | Detected   | 233.1    | Detected | 184.5    | Detected   | Bhlhe41       | 0.997836668 | 1.26068145 | 2.0800451  | 2.6279594 |
| A_51_P1402 | 17658.6  | Detected | 14438.5  | Detected   | 23438.2  | Detected | 17619.8  | Detected   | Fhl2          | 0.99780277  | 1.32729661 | 1.22033452 | 1.6233127 |
| A_55_P2024 | 3912.5   | Detected | 3335.3   | Detected   | 5149.6   | Detected | 3903.9   | Detected   | Rpe           | 0.997801917 | 1.31619169 | 1.17047942 | 1.5439691 |
| A_52_P4099 | 225.2    | Detected | 211.6    | Detected   | 192.4    | Detected | 224.7    | Detected   | Ccnt2         | 0.997779751 | 0.85435169 | 1.06190926 | 0.9092628 |
| A_51_P4903 | 4694.6   | Detected | 4147.3   | Detected   | 8181.5   | Detected | 4684.1   | Detected   | Nudt8         | 0.997763388 | 1.74274699 | 1.12943361 | 1.9727292 |
| A_55_P1985 | 121134.4 | Detected | 111383.4 | Detected   | 137426.1 | Detected | 120857.2 | Detected   | Rpl28         | 0.997711633 | 1.13449276 | 1.08505576 | 1.2338113 |
| A_55_P2004 | 2520.6   | Detected | 2312.5   | Detected   | 1966.8   | Detected | 2514.8   | Detected   | Cep95         | 0.997698961 | 0.78029041 | 1.08748108 | 0.8505081 |
| A_51_P4704 | 16864.9  | Detected | 11787.3  | Detected   | 14236.9  | Detected | 16826    | Detected   | Setx          | 0.997693434 | 0.8441734  | 1.42746855 | 1.2078169 |
| A_55_P2008 | 75039.2  | Detected | 39407.4  | Detected   | 72555    | Detected | 74861.7  | Detected   | Gstp2         | 0.99763457  | 0.96689464 | 1.89968635 | 1.8411517 |
| A_55_P2081 | 41.9     | Detected | 17.3     | Not Detect | 53       | Detected | 41.8     | Not Detect | Olfir477      | 0.997613365 | 1.26491647 | 2.41618497 | 3.0635838 |
| A_55_P2083 | 366.9    | Detected | 346      | Detected   | 324.3    | Detected | 366      | Detected   | Gm10142       | 0.997547016 | 0.88389207 | 1.05780347 | 0.9372832 |
| A_55_P1975 | 2314.1   | Detected | 2402.9   | Detected   | 2506.2   | Detected | 2308.4   | Detected   | Nfyb          | 0.997536839 | 1.08301283 | 0.96067252 | 1.0429897 |
| A_51_P3751 | 20912.6  | Detected | 25734.5  | Detected   | 24200.8  | Detected | 20860.6  | Detected   | Rpf2          | 0.997513461 | 1.15723535 | 0.81060833 | 0.940403  |
| A_55_P2084 | 418494.9 | Detected | 379329.1 | Detected   | 436511.6 | Detected | 417394.2 | Detected   | Hist1h2af     | 0.99736986  | 1.04305118 | 1.10034848 | 1.1507464 |
| A_51_P4414 | 214.1    | Detected | 190.7    | Detected   | 172.5    | Detected | 213.5    | Detected   | Jmy           | 0.997197571 | 0.80569827 | 1.11955952 | 0.9045621 |
| A_55_P2005 | 5763.1   | Detected | 8028     | Detected   | 5886.5   | Detected | 5746.9   | Detected   | Herc4         | 0.997189013 | 1.02141209 | 0.715857   | 0.7332461 |
| A_51_P3523 | 2458.6   | Detected | 2714.2   | Detected   | 3598.4   | Detected | 2451.6   | Detected   | Dhrs4         | 0.997152851 | 1.46359717 | 0.90324958 | 1.3257682 |
| A_52_P1171 | 207.4    | Detected | 194.2    | Detected   | 475.9    | Detected | 206.8    | Detected   | Epc1          | 0.99710704  | 2.29459981 | 1.06488157 | 2.4505664 |
| A_55_P2037 | 4835.2   | Detected | 5397.6   | Detected   | 4598.7   | Detected | 4821.2   | Detected   | Alkbh2        | 0.997104567 | 0.95108786 | 0.8932118  | 0.8519898 |
| A_52_P2349 | 7875.8   | Detected | 7065.3   | Detected   | 6490.8   | Detected | 7852.8   | Detected   | Dvl1          | 0.997079662 | 0.82414485 | 1.11146024 | 0.9186871 |

|            |          |          |          |          |          |          |          |            |               |             |            |            |           |
|------------|----------|----------|----------|----------|----------|----------|----------|------------|---------------|-------------|------------|------------|-----------|
| A_51_P1725 | 53319.7  | Detected | 45594.1  | Detected | 58332.1  | Detected | 53163.3  | Detected   | Sod2          | 0.99706675  | 1.09400653 | 1.16601271 | 1.2793783 |
| A_55_P2047 | 10756.2  | Detected | 7609     | Detected | 6084.1   | Detected | 10724.4  | Detected   | Mafg          | 0.997043566 | 0.56563656 | 1.40943619 | 0.7995926 |
| A_52_P1025 | 33149.9  | Detected | 27944.7  | Detected | 37529.8  | Detected | 33050.3  | Detected   | Psmc4         | 0.996995466 | 1.13212408 | 1.1827037  | 1.3430024 |
| A_55_P2171 | 1218.3   | Detected | 846.3    | Detected | 1114.9   | Detected | 1214.6   | Detected   | Nptn          | 0.996962981 | 0.91512764 | 1.43518847 | 1.3173815 |
| A_55_P1952 | 61519.5  | Detected | 53550.2  | Detected | 65307.3  | Detected | 61332.6  | Detected   | Gm11686       | 0.996961939 | 1.06157072 | 1.14532906 | 1.2195529 |
| A_66_P1191 | 2257.3   | Detected | 1394.3   | Detected | 2113.5   | Detected | 2250.4   | Detected   | Inpp5e        | 0.996943251 | 0.93629557 | 1.61399986 | 1.5158144 |
| A_66_P1298 | 221894.4 | Detected | 275292.9 | Detected | 212430.9 | Detected | 221206.1 | Detected   | Npm1          | 0.996898074 | 0.95735133 | 0.80352999 | 0.7716541 |
| A_55_P2006 | 32       | Detected | 38.7     | Detected | 28.5     | Detected | 31.9     | Not Detect | Parp10        | 0.996875    | 0.890625   | 0.82428941 | 0.7364341 |
| A_51_P1032 | 14879.6  | Detected | 11020.8  | Detected | 13372.4  | Detected | 14831.8  | Detected   | Ttc7          | 0.996787548 | 0.89870695 | 1.34580067 | 1.2133783 |
| A_55_P2145 | 4187.5   | Detected | 3550     | Detected | 4857.2   | Detected | 4174     | Detected   | Hist1h3c      | 0.996776119 | 1.15992836 | 1.17577465 | 1.3682254 |
| A_55_P2110 | 1253.9   | Detected | 1181     | Detected | 1322.3   | Detected | 1249.8   | Detected   | Pttg1         | 0.996730202 | 1.0545498  | 1.05825572 | 1.1196444 |
| A_51_P1060 | 30650.7  | Detected | 23722.9  | Detected | 27861.6  | Detected | 30550.2  | Detected   | Traf4         | 0.996721119 | 0.90900371 | 1.28779365 | 1.1744601 |
| A_52_P4520 | 800.5    | Detected | 672.5    | Detected | 461.8    | Detected | 797.8    | Detected   | Usp31         | 0.996627108 | 0.57688944 | 1.1863197  | 0.6866914 |
| A_55_P2016 | 135014.3 | Detected | 143954.2 | Detected | 141004.4 | Detected | 134558.7 | Detected   | Eif3d         | 0.996625543 | 1.04436641 | 0.93473271 | 0.9795088 |
| A_55_P1987 | 33137.8  | Detected | 36568.7  | Detected | 49685    | Detected | 33023    | Detected   | Trmt112       | 0.996535678 | 1.49934516 | 0.90304003 | 1.3586756 |
| A_55_P2107 | 8467.2   | Detected | 9323.9   | Detected | 9159     | Detected | 8437.5   | Detected   | Kansl2        | 0.996492347 | 1.08170351 | 0.90493249 | 0.9823143 |
| A_55_P1981 | 1444.1   | Detected | 1595.3   | Detected | 1592.4   | Detected | 1438.9   | Detected   | Rrp8          | 0.996399141 | 1.10269372 | 0.90196201 | 0.9981822 |
| A_52_P2870 | 12093.8  | Detected | 14114.4  | Detected | 16552.7  | Detected | 12049.9  | Detected   | Sssca1        | 0.996370041 | 1.36869305 | 0.85373094 | 1.1727526 |
| A_51_P1065 | 16700.4  | Detected | 15967.9  | Detected | 20911.3  | Detected | 16638.4  | Detected   | Fam195a       | 0.996287514 | 1.25214366 | 1.04199049 | 1.3095836 |
| A_55_P2143 | 89229.3  | Detected | 87776.5  | Detected | 82759.8  | Detected | 88896.9  | Detected   | Phgdh         | 0.996274766 | 0.92749579 | 1.01276424 | 0.9428469 |
| A_55_P1965 | 13779.3  | Detected | 11638.3  | Detected | 10543.6  | Detected | 13727.8  | Detected   | Hcfc1         | 0.99626251  | 0.76517675 | 1.17953653 | 0.9059399 |
| A_51_P1639 | 25115.7  | Detected | 22766.2  | Detected | 30018.9  | Detected | 25021.5  | Detected   | Spr           | 0.996249358 | 1.1952245  | 1.09906352 | 1.3185731 |
| A_55_P1983 | 23810    | Detected | 22330.3  | Detected | 22824.3  | Detected | 23719.7  | Detected   | Birc5         | 0.996207476 | 0.95860143 | 1.06222039 | 1.0221224 |
| A_55_P2181 | 865.7    | Detected | 1037     | Detected | 453.3    | Detected | 862.4    | Detected   | Akap11        | 0.996188056 | 0.5236225  | 0.8316297  | 0.4371263 |
| A_52_P6552 | 78.1     | Detected | 73.2     | Detected | 107.9    | Detected | 77.8     | Detected   | 6430550D23Rik | 0.996158771 | 1.3815621  | 1.06284153 | 1.4740437 |
| A_55_P2367 | 3934.5   | Detected | 3834.5   | Detected | 3604.9   | Detected | 3919.2   | Detected   | Pitpnb        | 0.996111323 | 0.91622824 | 1.02208893 | 0.9401226 |
| A_55_P1971 | 8542.7   | Detected | 7832.7   | Detected | 7240.4   | Detected | 8508     | Detected   | Slc4a1ap      | 0.995938052 | 0.84755405 | 1.08621548 | 0.9243811 |
| A_55_P2061 | 226581   | Detected | 173694.5 | Detected | 128072.1 | Detected | 225647.1 | Detected   | Tmsb4x        | 0.995878295 | 0.5652376  | 1.29910331 | 0.7373411 |
| A_55_P2112 | 22180.7  | Detected | 23356.7  | Detected | 22631.5  | Detected | 22088.6  | Detected   | Ube2b         | 0.995847742 | 1.02032398 | 0.94570723 | 0.9689511 |
| A_55_P2005 | 144.3    | Detected | 146.4    | Detected | 118.1    | Detected | 143.7    | Detected   | Ubxn11        | 0.995841996 | 0.81843382 | 0.98155738 | 0.806694  |
| A_51_P1946 | 47.1     | Detected | 35.5     | Detected | 38.8     | Detected | 46.9     | Not Detect | Prss34        | 0.995753715 | 0.82377919 | 1.32112676 | 1.0929577 |
| A_55_P1965 | 140.9    | Detected | 210.4    | Detected | 141.9    | Detected | 140.3    | Detected   | Eif4e         | 0.995741661 | 1.00709723 | 0.6668251  | 0.6744297 |
| A_55_P2136 | 8913.4   | Detected | 10552.1  | Detected | 12621.7  | Detected | 8875.4   | Detected   | Ripk4         | 0.995736756 | 1.41603653 | 0.84110272 | 1.1961316 |
| A_52_P5331 | 6731.2   | Detected | 5830.9   | Detected | 6080.2   | Detected | 6702.4   | Detected   | Dnajc2        | 0.995721417 | 0.90328619 | 1.14946235 | 1.042755  |
| A_52_P5517 | 419      | Detected | 361.8    | Detected | 378      | Detected | 417.2    | Detected   | Kdm6a         | 0.995704057 | 0.90214797 | 1.15312327 | 1.0447761 |
| A_55_P2065 | 7854.1   | Detected | 6879.4   | Detected | 7547.2   | Detected | 7820.3   | Detected   | Naa50         | 0.995696515 | 0.96092487 | 1.13677065 | 1.0970724 |
| A_51_P1981 | 2123.8   | Detected | 3002.4   | Detected | 2079.2   | Detected | 2114.6   | Detected   | Ubxn8         | 0.995668142 | 0.97899991 | 0.70430322 | 0.6925127 |
| A_55_P2077 | 646      | Detected | 621.5    | Detected | 684.6    | Detected | 643.2    | Detected   | C330021F23Rik | 0.995665635 | 1.05975232 | 1.03491553 | 1.1015286 |
| A_55_P2064 | 3526.7   | Detected | 2473.1   | Detected | 3047.1   | Detected | 3511.2   | Detected   | Anks1         | 0.995604956 | 0.86400885 | 1.41975658 | 1.2320974 |
| A_55_P2015 | 22.3     | Detected | 20       | Detected | 30.8     | Detected | 22.2     | Not Detect | Abat          | 0.995515695 | 1.38116592 | 1.11       | 1.54      |

|            |          |          |          |          |          |            |          |            |               |             |            |            |           |
|------------|----------|----------|----------|----------|----------|------------|----------|------------|---------------|-------------|------------|------------|-----------|
| A_55_P2108 | 65.6     | Detected | 53.3     | Detected | 75.9     | Detected   | 65.3     | Detected   | Ephb6         | 0.995426829 | 1.1570122  | 1.22514071 | 1.424015  |
| A_55_P2057 | 2427.1   | Detected | 2508.1   | Detected | 2722.2   | Detected   | 2415.8   | Detected   | Rft1          | 0.995344238 | 1.12158543 | 0.96319923 | 1.0853634 |
| A_66_P1332 | 19447    | Detected | 18397.9  | Detected | 19171.1  | Detected   | 19356    | Detected   | Hnrnp1l       | 0.995320615 | 0.98581272 | 1.0520766  | 1.0420265 |
| A_55_P2135 | 13188.5  | Detected | 13660    | Detected | 13577.7  | Detected   | 13125.5  | Detected   | Rpgrip1       | 0.995223111 | 1.02951056 | 0.96087116 | 0.9939751 |
| A_55_P2111 | 331.4    | Detected | 537.6    | Detected | 378.1    | Detected   | 329.8    | Detected   | Klhl32        | 0.995171998 | 1.14091732 | 0.61346726 | 0.703311  |
| A_51_P2621 | 3950.1   | Detected | 3753.1   | Detected | 3680.4   | Detected   | 3930.9   | Detected   | Ptcd2         | 0.995139364 | 0.93172325 | 1.04737417 | 0.9806293 |
| A_55_P2011 | 9465.7   | Detected | 6372.5   | Detected | 7982.7   | Detected   | 9418.8   | Detected   | Ralgapb       | 0.995045269 | 0.84332907 | 1.47803845 | 1.2526795 |
| A_55_P1963 | 30386.1  | Detected | 27858.9  | Detected | 26591.5  | Detected   | 30232    | Detected   | E430025E21Rik | 0.994928602 | 0.87512053 | 1.08518283 | 0.9545065 |
| A_52_P2498 | 45888    | Detected | 42836.8  | Detected | 39304.4  | Detected   | 45653.5  | Detected   | Agpat6        | 0.994889732 | 0.85652894 | 1.06575421 | 0.9175382 |
| A_55_P1958 | 13241    | Detected | 13062.8  | Detected | 15660.4  | Detected   | 13173.3  | Detected   | Arf2          | 0.994887093 | 1.18272034 | 1.00845914 | 1.1988548 |
| A_55_P2067 | 19.5     | Detected | 33.2     | Detected | 13.4     | Not Detect | 19.4     | Not Detect | Zfp827        | 0.994871795 | 0.68717949 | 0.58433735 | 0.4036145 |
| A_51_P3593 | 32270.7  | Detected | 28963.6  | Detected | 40168.4  | Detected   | 32102.1  | Detected   | Fh1           | 0.994775446 | 1.24473284 | 1.10836015 | 1.386858  |
| A_55_P1991 | 12347.3  | Detected | 13016    | Detected | 14827.6  | Detected   | 12282.1  | Detected   | Ppp1r16a      | 0.994719493 | 1.20087792 | 0.94361555 | 1.1391825 |
| A_55_P2080 | 151648   | Detected | 163575.5 | Detected | 163134.5 | Detected   | 150844   | Detected   | Rpl26         | 0.994698249 | 1.07574449 | 0.92216744 | 0.997304  |
| A_52_P4676 | 6326.8   | Detected | 4778.2   | Detected | 4883.1   | Detected   | 6293.1   | Detected   | Sptbn1        | 0.994673453 | 0.77181197 | 1.31704408 | 1.0219539 |
| A_55_P1990 | 36048.7  | Detected | 28471.6  | Detected | 41774.5  | Detected   | 35855.4  | Detected   | Msrb1         | 0.994637809 | 1.15883513 | 1.25933913 | 1.467234  |
| A_55_P1980 | 36797.9  | Detected | 34405.5  | Detected | 35924.9  | Detected   | 36600.4  | Detected   | Srsf3         | 0.994632846 | 0.97627582 | 1.06379503 | 1.0441615 |
| A_55_P2025 | 27022.4  | Detected | 24919.8  | Detected | 29940.3  | Detected   | 26876.7  | Detected   | Ammecr1l      | 0.994608177 | 1.10798079 | 1.07852792 | 1.2014663 |
| A_51_P4464 | 9951.6   | Detected | 7488     | Detected | 8052.4   | Detected   | 9897.6   | Detected   | Cldn25        | 0.994573737 | 0.80915632 | 1.32179487 | 1.0753739 |
| A_55_P2317 | 18.2     | Detected | 24.3     | Detected | 11.7     | Not Detect | 18.1     | Not Detect | E130104P22Rik | 0.994505495 | 0.64285714 | 0.74485597 | 0.4814815 |
| A_52_P5788 | 72.5     | Detected | 70.8     | Detected | 74.9     | Detected   | 72.1     | Detected   | Pigb          | 0.994482759 | 1.03310345 | 1.01836158 | 1.0579096 |
| A_55_P2131 | 333945.8 | Detected | 298515.6 | Detected | 357938   | Detected   | 332087.9 | Detected   | Hist2h2aa2    | 0.994436522 | 1.07184459 | 1.11246414 | 1.1990596 |
| A_66_P1110 | 2422.5   | Detected | 2516.7   | Detected | 3031.7   | Detected   | 2408.8   | Detected   | Ube2f         | 0.994344685 | 1.25147575 | 0.9571264  | 1.2046331 |
| A_52_P1617 | 555.9    | Detected | 687.9    | Detected | 506.8    | Detected   | 552.7    | Detected   | Cand1         | 0.994243569 | 0.91167476 | 0.80345981 | 0.736735  |
| A_51_P3234 | 2904.5   | Detected | 2689     | Detected | 2775.4   | Detected   | 2887.4   | Detected   | Gtf2h2        | 0.994112584 | 0.95555173 | 1.07378208 | 1.0321309 |
| A_52_P6467 | 12151.3  | Detected | 12754    | Detected | 11663.6  | Detected   | 12079.4  | Detected   | Tex30         | 0.994082938 | 0.95986438 | 0.94710679 | 0.9145053 |
| A_51_P1336 | 253.5    | Detected | 235.3    | Detected | 296.6    | Detected   | 252      | Detected   | Gtf2a1        | 0.99408284  | 1.17001972 | 1.07097323 | 1.2605185 |
| A_55_P2126 | 50.2     | Detected | 39.1     | Detected | 38.9     | Detected   | 49.9     | Detected   | E230025N22Rik | 0.994023904 | 0.7749004  | 1.27621483 | 0.9948849 |
| A_55_P2046 | 380.9    | Detected | 320.3    | Detected | 439.5    | Detected   | 378.6    | Detected   | Arl6ip6       | 0.99396167  | 1.15384615 | 1.18201686 | 1.3721511 |
| A_51_P1078 | 379.3    | Detected | 396      | Detected | 360.3    | Detected   | 377      | Detected   | Ttc19         | 0.993936198 | 0.94990772 | 0.9520202  | 0.9098485 |
| A_52_P1482 | 1018.8   | Detected | 1018.3   | Detected | 981.3    | Detected   | 1012.5   | Detected   | Mis18bp1      | 0.993816254 | 0.96319199 | 0.99430423 | 0.9636649 |
| A_51_P1512 | 1794.4   | Detected | 1484.1   | Detected | 2130.1   | Detected   | 1783.3   | Detected   | Slc35b3       | 0.993814088 | 1.18708203 | 1.20160367 | 1.4352806 |
| A_51_P1626 | 659.4    | Detected | 837.3    | Detected | 663.9    | Detected   | 655.3    | Detected   | Armc7         | 0.993782226 | 1.00682439 | 0.78263466 | 0.7929058 |
| A_55_P2145 | 111.9    | Detected | 114.9    | Detected | 87.3     | Detected   | 111.2    | Detected   | Gm9975        | 0.993744415 | 0.78016086 | 0.96779809 | 0.7597911 |
| A_51_P4509 | 8730.5   | Detected | 7926.5   | Detected | 10756.8  | Detected   | 8675.8   | Detected   | Pole4         | 0.993734609 | 1.23209438 | 1.094531   | 1.3570681 |
| A_55_P2416 | 537.8    | Detected | 497.6    | Detected | 413.7    | Detected   | 534.4    | Detected   | Cep290        | 0.993677947 | 0.76924507 | 1.07395498 | 0.8313907 |
| A_55_P2110 | 94.5     | Detected | 105.2    | Detected | 68.1     | Detected   | 93.9     | Detected   | Proca1        | 0.993650794 | 0.72063492 | 0.89258555 | 0.6473384 |
| A_52_P4694 | 329.1    | Detected | 303.2    | Detected | 285.4    | Detected   | 327      | Detected   | Toe1          | 0.993618961 | 0.86721361 | 1.07849604 | 0.9412929 |
| A_51_P4899 | 4568     | Detected | 4377.5   | Detected | 4978.7   | Detected   | 4538.8   | Detected   | Ogg1          | 0.993607706 | 1.08990806 | 1.03684752 | 1.1373387 |
| A_55_P1973 | 1289.4   | Detected | 944.1    | Detected | 1446.1   | Detected   | 1281.1   | Detected   | Sema6b        | 0.993562897 | 1.12152939 | 1.35695371 | 1.5317233 |

|            |          |          |          |            |          |            |          |            |               |             |            |            |           |
|------------|----------|----------|----------|------------|----------|------------|----------|------------|---------------|-------------|------------|------------|-----------|
| A_55_P2322 | 339.7    | Detected | 276.8    | Detected   | 303.8    | Detected   | 337.5    | Detected   | Chm           | 0.993523697 | 0.89431852 | 1.21929191 | 1.0975434 |
| A_51_P4257 | 2206.5   | Detected | 2131.2   | Detected   | 2125.7   | Detected   | 2192     | Detected   | Tbc1d7        | 0.993428507 | 0.96338092 | 1.02852853 | 0.9974193 |
| A_55_P2067 | 15.2     | Detected | 10.2     | Not Detect | 12.2     | Not Detect | 15.1     | Not Detect | Psg21         | 0.993421053 | 0.80263158 | 1.48039216 | 1.1960784 |
| A_55_P1995 | 348796.3 | Detected | 331721.1 | Detected   | 358171.9 | Detected   | 346478.6 | Detected   | Rplp1         | 0.993355147 | 1.02687987 | 1.04448767 | 1.0797381 |
| A_55_P2125 | 966.8    | Detected | 813      | Detected   | 1078.7   | Detected   | 960.3    | Detected   | Tulp1         | 0.993276789 | 1.11574266 | 1.18118081 | 1.3268143 |
| A_55_P2079 | 180451.6 | Detected | 170433.2 | Detected   | 192353.2 | Detected   | 179233.3 | Detected   | Gm13249       | 0.993248605 | 1.06595453 | 1.05163372 | 1.1286134 |
| A_55_P2035 | 29.5     | Detected | 27.5     | Detected   | 15.2     | Not Detect | 29.3     | Not Detect | Gm8884        | 0.993220339 | 0.51525424 | 1.06545455 | 0.5527273 |
| A_55_P1957 | 210056.2 | Detected | 125258.9 | Detected   | 208057.7 | Detected   | 208628.7 | Detected   | Gstp2         | 0.9932042   | 0.99048588 | 1.66557985 | 1.6610213 |
| A_66_P1266 | 131.2    | Detected | 142.2    | Detected   | 110.2    | Detected   | 130.3    | Detected   | 4732414G09Rik | 0.993140244 | 0.83993902 | 0.91631505 | 0.7749648 |
| A_55_P1968 | 29       | Detected | 36.6     | Detected   | 30.6     | Detected   | 28.8     | Not Detect | Gm10431       | 0.993103448 | 1.05517241 | 0.78688525 | 0.8360656 |
| A_55_P2068 | 173.5    | Detected | 116      | Detected   | 108.8    | Detected   | 172.3    | Detected   | Gm20878       | 0.993083573 | 0.62708934 | 1.48534483 | 0.937931  |
| A_55_P2004 | 1170.9   | Detected | 1430.3   | Detected   | 889.2    | Detected   | 1162.8   | Detected   | Dnajc25       | 0.993082244 | 0.75941583 | 0.8129763  | 0.6216878 |
| A_55_P1988 | 36996.4  | Detected | 34641.4  | Detected   | 48930.6  | Detected   | 36740.1  | Detected   | Eef1g         | 0.993072299 | 1.32257733 | 1.06058358 | 1.4124891 |
| A_51_P4576 | 171.5    | Detected | 173.5    | Detected   | 163.9    | Detected   | 170.3    | Detected   | Cyp46a1       | 0.993002915 | 0.95568513 | 0.9815562  | 0.9446686 |
| A_52_P3169 | 2547.6   | Detected | 2133.6   | Detected   | 2402.2   | Detected   | 2529.7   | Detected   | Sh3bgrl2      | 0.992973779 | 0.94292668 | 1.18564867 | 1.1258905 |
| A_51_P4242 | 40959.2  | Detected | 37952.5  | Detected   | 46580    | Detected   | 40668.2  | Detected   | Gm6211        | 0.992895369 | 1.13722924 | 1.07155523 | 1.2273236 |
| A_52_P2337 | 1429.5   | Detected | 1682.5   | Detected   | 863.7    | Detected   | 1419.3   | Detected   | Depdc7        | 0.992864638 | 0.60419727 | 0.84356612 | 0.5133432 |
| A_55_P2145 | 3069.9   | Detected | 2772.1   | Detected   | 2753.1   | Detected   | 3047.9   | Detected   | Pde1a         | 0.992833643 | 0.89680446 | 1.09949136 | 0.993146  |
| A_55_P1959 | 932.9    | Detected | 597.1    | Detected   | 602.6    | Detected   | 926.2    | Detected   | Cep135        | 0.992818094 | 0.64594276 | 1.55116396 | 1.0092112 |
| A_55_P2008 | 46713.5  | Detected | 49221.8  | Detected   | 55777    | Detected   | 46376.7  | Detected   | Mrpl30        | 0.992790093 | 1.19402314 | 0.94219838 | 1.1331768 |
| A_55_P2080 | 306271.8 | Detected | 295072.4 | Detected   | 291775.5 | Detected   | 304052.4 | Detected   | Hspa8         | 0.992753495 | 0.95266851 | 1.03043321 | 0.9888268 |
| A_55_P2043 | 20301.6  | Detected | 26928.3  | Detected   | 18939.3  | Detected   | 20152.7  | Detected   | Mrto4         | 0.992665603 | 0.93289691 | 0.74838367 | 0.7033233 |
| A_55_P2046 | 30950.6  | Detected | 33418.1  | Detected   | 30418.5  | Detected   | 30723.5  | Detected   | Aarsd1        | 0.992662501 | 0.98280809 | 0.91936705 | 0.9102403 |
| A_55_P1977 | 428.3    | Detected | 371.7    | Detected   | 424.2    | Detected   | 425.1    | Detected   | Elk4          | 0.992528601 | 0.99042727 | 1.14366425 | 1.1412429 |
| A_55_P2044 | 3367.3   | Detected | 3142.8   | Detected   | 2918.8   | Detected   | 3341.9   | Detected   | Klc1          | 0.992456865 | 0.86680723 | 1.06335115 | 0.928726  |
| A_51_P1732 | 9926.1   | Detected | 6110.3   | Detected   | 9362.8   | Detected   | 9851.1   | Detected   | Osbpl2        | 0.992444162 | 0.94325062 | 1.61221217 | 1.5322979 |
| A_55_P2008 | 39.7     | Detected | 46.8     | Detected   | 32.2     | Detected   | 39.4     | Not Detect | Rrm2b         | 0.992443325 | 0.81108312 | 0.84188034 | 0.6880342 |
| A_51_P2378 | 1208.9   | Detected | 1323.6   | Detected   | 1300.6   | Detected   | 1199.7   | Detected   | Tmcc1         | 0.992389776 | 1.07585408 | 0.90639166 | 0.9826231 |
| A_55_P2000 | 261.3    | Detected | 198      | Detected   | 257      | Detected   | 259.3    | Detected   | Mab21l2       | 0.992345962 | 0.98354382 | 1.30959596 | 1.2979798 |
| A_55_P2085 | 334.3    | Detected | 262.2    | Detected   | 228.3    | Detected   | 331.7    | Detected   | Mapk8ip3      | 0.992222555 | 0.68291953 | 1.26506484 | 0.8707094 |
| A_55_P2003 | 423.4    | Detected | 348.3    | Detected   | 382.3    | Detected   | 420.1    | Detected   | Scn3b         | 0.992205952 | 0.90292867 | 1.20614413 | 1.097617  |
| A_51_P2954 | 11884.8  | Detected | 9698.3   | Detected   | 15293.6  | Detected   | 11792    | Detected   | Nek7          | 0.992191707 | 1.28682014 | 1.2158832  | 1.5769362 |
| A_51_P2244 | 6960.6   | Detected | 7859.9   | Detected   | 8061.4   | Detected   | 6906.2   | Detected   | 9430016H08Rik | 0.992184582 | 1.15814729 | 0.87866258 | 1.0256365 |
| A_55_P1964 | 354.7    | Detected | 266.8    | Detected   | 335.1    | Detected   | 351.9    | Detected   | Ppwd1         | 0.992106005 | 0.94474204 | 1.31896552 | 1.255997  |
| A_52_P1306 | 214.4    | Detected | 186.6    | Detected   | 191.3    | Detected   | 212.7    | Detected   | Olfir549      | 0.992070896 | 0.89225746 | 1.13987138 | 1.0251876 |
| A_55_P2097 | 213208.9 | Detected | 200266.4 | Detected   | 231677.5 | Detected   | 211514   | Detected   | Rps11         | 0.992050519 | 1.08662209 | 1.05616319 | 1.1568466 |
| A_66_P1162 | 3697.9   | Detected | 2521.6   | Detected   | 3171.8   | Detected   | 3668.5   | Detected   | Pias1         | 0.992049542 | 0.85773006 | 1.45483027 | 1.2578522 |
| A_51_P4187 | 7095.1   | Detected | 4054.3   | Detected   | 4462.7   | Detected   | 7038.3   | Detected   | Plekhf1       | 0.991994475 | 0.62898338 | 1.73600868 | 1.1007326 |
| A_55_P2073 | 10251.3  | Detected | 8052.9   | Detected   | 9574.9   | Detected   | 10169    | Detected   | Hps4          | 0.99197175  | 0.93401812 | 1.2627749  | 1.1890002 |
| A_55_P2155 | 251218.9 | Detected | 239121.4 | Detected   | 280334.2 | Detected   | 249194.1 | Detected   | Rplp1         | 0.991940097 | 1.11589614 | 1.04212379 | 1.1723509 |



|            |          |            |          |            |          |          |          |            |               |             |            |            |           |
|------------|----------|------------|----------|------------|----------|----------|----------|------------|---------------|-------------|------------|------------|-----------|
| A_55_P2046 | 124      | Detected   | 117.5    | Detected   | 92.7     | Detected | 123      | Detected   | Gm6225        | 0.991935484 | 0.74758065 | 1.04680851 | 0.7889362 |
| A_52_P4202 | 309      | Detected   | 304.2    | Detected   | 180.2    | Detected | 306.5    | Detected   | N4bp1         | 0.991909385 | 0.58317152 | 1.00756082 | 0.5923734 |
| A_55_P1967 | 186406.8 | Detected   | 187485.6 | Detected   | 211409.1 | Detected | 184896.8 | Detected   | Gm13229       | 0.991899437 | 1.13412762 | 0.98619201 | 1.1276018 |
| A_55_P2211 | 1981.2   | Detected   | 1548.4   | Detected   | 1055.8   | Detected | 1965.1   | Detected   | 5330406M23Rik | 0.991873612 | 0.53290935 | 1.26911651 | 0.6818652 |
| A_55_P2117 | 86       | Detected   | 78       | Detected   | 79       | Detected | 85.3     | Detected   | Dnajc14       | 0.991860465 | 0.91860465 | 1.09358974 | 1.0128205 |
| A_55_P2398 | 134.8    | Detected   | 114.4    | Detected   | 120.8    | Detected | 133.7    | Detected   | Astn2         | 0.991839763 | 0.89614243 | 1.16870629 | 1.0559441 |
| A_52_P5073 | 757.7    | Detected   | 686.6    | Detected   | 1069.4   | Detected | 751.4    | Detected   | Unc93b1       | 0.991685364 | 1.41137653 | 1.09437809 | 1.5575299 |
| A_52_P8409 | 43079.9  | Detected   | 32749.8  | Detected   | 39347.6  | Detected | 42717.3  | Detected   | Pgd           | 0.991583082 | 0.91336331 | 1.304353   | 1.2014608 |
| A_51_P2721 | 15591.6  | Detected   | 15955    | Detected   | 18649.3  | Detected | 15459.7  | Detected   | Ndufa10       | 0.991540317 | 1.19611201 | 0.96895644 | 1.1688687 |
| A_52_P2835 | 3555.3   | Detected   | 3577.4   | Detected   | 3346.3   | Detected | 3525     | Detected   | Zc3h7b        | 0.991477512 | 0.94121452 | 0.98535249 | 0.9354    |
| A_51_P4852 | 8386.9   | Detected   | 7569.1   | Detected   | 8047     | Detected | 8315.3   | Detected   | Adipor1       | 0.991462877 | 0.95947251 | 1.09858504 | 1.0631383 |
| A_52_P6843 | 102721.3 | Detected   | 109910.1 | Detected   | 93725.6  | Detected | 101843.9 | Detected   | Gpx1          | 0.991458441 | 0.91242615 | 0.92661093 | 0.8527478 |
| A_55_P1978 | 5399.6   | Detected   | 3266     | Detected   | 5101.3   | Detected | 5352.9   | Detected   | Camk2d        | 0.991351211 | 0.94475517 | 1.63897734 | 1.5619412 |
| A_55_P2014 | 23       | Detected   | 18.3     | Not Detect | 19.7     | Detected | 22.8     | Not Detect | Naip7         | 0.991304348 | 0.85652174 | 1.24590164 | 1.0765027 |
| A_52_P1388 | 57.1     | Detected   | 127.2    | Detected   | 93.7     | Detected | 56.6     | Detected   | Dlgap3        | 0.991243433 | 1.64098074 | 0.44496855 | 0.7366352 |
| A_55_P1995 | 44432    | Detected   | 50026    | Detected   | 48610.8  | Detected | 44036.5  | Detected   | Odc1          | 0.991098758 | 1.09404933 | 0.88027226 | 0.9717107 |
| A_52_P5337 | 23238.4  | Detected   | 24807.5  | Detected   | 27545.6  | Detected | 23031.2  | Detected   | Sucla2        | 0.991083723 | 1.18534839 | 0.92839665 | 1.1103739 |
| A_55_P1966 | 9566.9   | Detected   | 9673     | Detected   | 9322.6   | Detected | 9480.8   | Detected   | Scrn2         | 0.99100022  | 0.97446404 | 0.98013026 | 0.9637755 |
| A_55_P2015 | 171875.1 | Detected   | 180072.9 | Detected   | 175992.6 | Detected | 170323.3 | Detected   | Rpl22         | 0.990971351 | 1.02395635 | 0.94585748 | 0.9773408 |
| A_52_P4703 | 8569.3   | Detected   | 10893.7  | Detected   | 10208.2  | Detected | 8491.7   | Detected   | Laptm4b       | 0.990944418 | 1.19125249 | 0.77950559 | 0.9370737 |
| A_55_P2079 | 11       | Not Detect | 26.2     | Detected   | 26.4     | Detected | 10.9     | Not Detect | Fam154b       | 0.990909091 | 2.4        | 0.41603053 | 1.0076336 |
| A_55_P2057 | 96820.1  | Detected   | 107573.3 | Detected   | 85127    | Detected | 95934.2  | Detected   | Hsp90aa1      | 0.99085004  | 0.87922859 | 0.89180308 | 0.7913395 |
| A_55_P2167 | 54.1     | Detected   | 60.1     | Detected   | 70       | Detected | 53.6     | Detected   | Olf1184       | 0.990757856 | 1.29390018 | 0.89184692 | 1.1647255 |
| A_51_P3951 | 3898.9   | Detected   | 2468.1   | Detected   | 3641.1   | Detected | 3862.8   | Detected   | Pex16         | 0.990740978 | 0.93387879 | 1.56509056 | 1.4752644 |
| A_55_P1978 | 1780.5   | Detected   | 2130.3   | Detected   | 1681.3   | Detected | 1763.8   | Detected   | Mutyh         | 0.990620612 | 0.94428531 | 0.8279585  | 0.7892316 |
| A_52_P1980 | 4946.3   | Detected   | 5472.4   | Detected   | 6264.5   | Detected | 4899.9   | Detected   | Mrpl44        | 0.990619251 | 1.26650223 | 0.89538411 | 1.1447445 |
| A_55_P2064 | 32289.9  | Detected   | 23286.5  | Detected   | 33025.4  | Detected | 31986.1  | Detected   | Lama5         | 0.990591485 | 1.02277802 | 1.37358985 | 1.4182209 |
| A_52_P9823 | 2669.8   | Detected   | 1922.8   | Detected   | 2840.9   | Detected | 2644.4   | Detected   | Hira          | 0.990486179 | 1.0640872  | 1.37528604 | 1.4774808 |
| A_52_P2027 | 2087     | Detected   | 1507.8   | Detected   | 1426.6   | Detected | 2067.1   | Detected   | Rragc         | 0.990464782 | 0.68356493 | 1.37093779 | 0.9461467 |
| A_52_P6390 | 125.6    | Detected   | 70.1     | Detected   | 130.6    | Detected | 124.4    | Detected   | Strbp         | 0.99044586  | 1.03980892 | 1.7746077  | 1.8630528 |
| A_55_P2290 | 83.7     | Detected   | 112.6    | Detected   | 195.8    | Detected | 82.9     | Detected   | Rorb          | 0.990442055 | 2.33930705 | 0.73623446 | 1.7388988 |
| A_52_P5730 | 38035    | Detected   | 45103.4  | Detected   | 38508.8  | Detected | 37671.2  | Detected   | Cand1         | 0.990435126 | 1.01245695 | 0.83521863 | 0.8537893 |
| A_52_P2430 | 2049.7   | Detected   | 2043.2   | Detected   | 1597     | Detected | 2030     | Detected   | Nufip2        | 0.990388837 | 0.77913841 | 0.99353955 | 0.7816171 |
| A_55_P2276 | 51.9     | Detected   | 44.8     | Detected   | 34.3     | Detected | 51.4     | Not Detect | 4930474N09Rik | 0.990366089 | 0.66088632 | 1.14732143 | 0.765625  |
| A_55_P2185 | 193706.5 | Detected   | 169113.5 | Detected   | 213287.6 | Detected | 191836.1 | Detected   | Gm11810       | 0.990344155 | 1.10108644 | 1.13436302 | 1.2612098 |
| A_55_P2020 | 599.7    | Detected   | 623.2    | Detected   | 576.6    | Detected | 593.9    | Detected   | BC089491      | 0.990328498 | 0.96148074 | 0.9529846  | 0.9252246 |
| A_51_P4145 | 472.9    | Detected   | 373      | Detected   | 160.5    | Detected | 468.3    | Detected   | Casp7         | 0.990272785 | 0.33939522 | 1.25549598 | 0.4302949 |
| A_55_P2003 | 20570.4  | Detected   | 19486    | Detected   | 17148    | Detected | 20367.1  | Detected   | Jkamp         | 0.990116867 | 0.83362501 | 1.04521708 | 0.8800164 |
| A_55_P2023 | 30.3     | Detected   | 26       | Detected   | 37       | Detected | 30       | Not Detect | Txn2          | 0.99009901  | 1.22112211 | 1.15384615 | 1.4230769 |
| A_51_P4648 | 24134.4  | Detected   | 19291.5  | Detected   | 27636    | Detected | 23894.6  | Detected   | Hist1h1e      | 0.990063975 | 1.14508751 | 1.23860768 | 1.432548  |

|            |          |            |          |            |          |            |          |            |               |             |            |            |           |
|------------|----------|------------|----------|------------|----------|------------|----------|------------|---------------|-------------|------------|------------|-----------|
| A_55_P2039 | 11801.8  | Detected   | 10420.9  | Detected   | 10650.3  | Detected   | 11684.2  | Detected   | Ilkap         | 0.990035418 | 0.90243014 | 1.12122753 | 1.0220135 |
| A_52_P6574 | 59821.1  | Detected   | 55171.8  | Detected   | 59487.3  | Detected   | 59220.4  | Detected   | Psmc5         | 0.989958393 | 0.99442003 | 1.07338169 | 1.0782193 |
| A_55_P1956 | 297493.6 | Detected   | 290020.2 | Detected   | 310693.9 | Detected   | 294498   | Detected   | Rpl27         | 0.98993054  | 1.04437171 | 1.01543961 | 1.0712837 |
| A_52_P4063 | 5608.6   | Detected   | 4881.7   | Detected   | 4698.5   | Detected   | 5552.1   | Detected   | Med14         | 0.989926185 | 0.83773134 | 1.13732921 | 0.9624721 |
| A_55_P2067 | 2020.9   | Detected   | 1441     | Detected   | 2243.9   | Detected   | 2000.5   | Detected   | Usp21         | 0.989905488 | 1.11034688 | 1.38827203 | 1.5571825 |
| A_55_P2159 | 663.3    | Detected   | 1554     | Detected   | 613      | Detected   | 656.6    | Detected   | Zfp52         | 0.98989899  | 0.92416704 | 0.42252252 | 0.3944659 |
| A_55_P2419 | 807      | Detected   | 704.4    | Detected   | 960.2    | Detected   | 798.8    | Detected   | 4932412D23Rik | 0.98983891  | 1.18983891 | 1.13401476 | 1.3631459 |
| A_51_P3213 | 2243.7   | Detected   | 1938.7   | Detected   | 2146.7   | Detected   | 2220.8   | Detected   | Sptlc2        | 0.989793644 | 0.95676784 | 1.14550988 | 1.1072884 |
| A_55_P1985 | 12094.4  | Detected   | 9978.8   | Detected   | 10831    | Detected   | 11970.2  | Detected   | Thumpd1       | 0.989730784 | 0.89553843 | 1.19956307 | 1.0854011 |
| A_51_P2540 | 7368.7   | Detected   | 6412.8   | Detected   | 8309.4   | Detected   | 7292.9   | Detected   | Traip         | 0.989713247 | 1.1276616  | 1.13724114 | 1.2957522 |
| A_55_P1997 | 48.6     | Detected   | 34.6     | Detected   | 49.9     | Detected   | 48.1     | Not Detect | Usp35         | 0.989711934 | 1.02674897 | 1.39017341 | 1.4421965 |
| A_52_P2131 | 5414.9   | Detected   | 5036.9   | Detected   | 3565.4   | Detected   | 5359     | Detected   | Cul4b         | 0.989676633 | 0.65844245 | 1.06394806 | 0.707856  |
| A_52_P6573 | 10411.7  | Detected   | 8133.6   | Detected   | 11466.4  | Detected   | 10304    | Detected   | Tmem160       | 0.989655868 | 1.1012995  | 1.26684371 | 1.4097571 |
| A_55_P2093 | 67.5     | Detected   | 42.2     | Detected   | 34.2     | Detected   | 66.8     | Detected   | AL117821      | 0.98962963  | 0.50666667 | 1.58293839 | 0.8104265 |
| A_55_P1978 | 416993.8 | Detected   | 392058.5 | Detected   | 433294.1 | Detected   | 412666.7 | Detected   | Rpl35         | 0.989623107 | 1.03909003 | 1.05256409 | 1.1051772 |
| A_51_P3172 | 33282.6  | Detected   | 33300.3  | Detected   | 35388.7  | Detected   | 32936.6  | Detected   | Bod1          | 0.989604178 | 1.06327931 | 0.98907818 | 1.0627141 |
| A_55_P2107 | 6567.8   | Detected   | 6423.1   | Detected   | 6577.1   | Detected   | 6498.9   | Detected   | Yy1           | 0.989509425 | 1.001416   | 1.01180116 | 1.023976  |
| A_55_P2124 | 38.1     | Detected   | 31.1     | Detected   | 5.4      | Not Detect | 37.7     | Not Detect | Gm10436       | 0.989501312 | 0.14173228 | 1.21221865 | 0.1736334 |
| A_55_P2024 | 2856.7   | Detected   | 3103.9   | Detected   | 2807.8   | Detected   | 2826.7   | Detected   | Tmem33        | 0.989498372 | 0.98288235 | 0.910693   | 0.9046039 |
| A_51_P3492 | 131.9    | Detected   | 167      | Detected   | 127.8    | Detected   | 130.5    | Detected   | Nckap5l       | 0.989385898 | 0.96891585 | 0.78143713 | 0.7652695 |
| A_55_P2015 | 6283.1   | Detected   | 5131.5   | Detected   | 4486.4   | Detected   | 6216.4   | Detected   | Zfp46         | 0.989384221 | 0.71404243 | 1.21141966 | 0.8742863 |
| A_51_P4362 | 9247.1   | Detected   | 8107.2   | Detected   | 10988.9  | Detected   | 9148.2   | Detected   | Gart          | 0.989304755 | 1.18836176 | 1.12840438 | 1.3554495 |
| A_55_P2238 | 241.9    | Detected   | 203      | Detected   | 197.5    | Detected   | 239.3    | Detected   | A830054O07Rik | 0.989251757 | 0.81645308 | 1.17881773 | 0.9729064 |
| A_55_P2422 | 9.3      | Not Detect | 16.7     | Detected   | 3.3      | Not Detect | 9.2      | Not Detect | E230024E03Rik | 0.989247312 | 0.35483871 | 0.5508982  | 0.1976048 |
| A_55_P2103 | 103544.8 | Detected   | 94057.5  | Detected   | 96569    | Detected   | 102431.4 | Detected   | Psmc2         | 0.989247166 | 0.93263013 | 1.08902958 | 1.0267018 |
| A_52_P1100 | 1327.1   | Detected   | 1183.4   | Detected   | 1273.2   | Detected   | 1312.8   | Detected   | Rqcd1         | 0.989224625 | 0.95938513 | 1.10934595 | 1.075883  |
| A_51_P4284 | 9.2      | Not Detect | 7.2      | Not Detect | 19.6     | Detected   | 9.1      | Not Detect | Fgb           | 0.989130435 | 2.13043478 | 1.26388889 | 2.7222222 |
| A_55_P2177 | 36.8     | Detected   | 41.7     | Detected   | 39.3     | Detected   | 36.4     | Not Detect | Nkx3-2        | 0.989130435 | 1.06793478 | 0.87290168 | 0.942446  |
| A_55_P1994 | 9036.8   | Detected   | 6994.2   | Detected   | 9306.2   | Detected   | 8937.5   | Detected   | Senp2         | 0.989011597 | 1.02981144 | 1.2778445  | 1.3305596 |
| A_55_P2014 | 1287.8   | Detected   | 1181.1   | Detected   | 1432.6   | Detected   | 1273.6   | Detected   | Scyl2         | 0.988973443 | 1.11243982 | 1.07831682 | 1.2129371 |
| A_55_P2074 | 606.9    | Detected   | 431      | Detected   | 514      | Detected   | 600.1    | Detected   | Haa0          | 0.988795518 | 0.84692701 | 1.39234339 | 1.1925754 |
| A_55_P2060 | 80.3     | Detected   | 73.8     | Detected   | 63.4     | Detected   | 79.4     | Detected   | Stk11ip       | 0.98879203  | 0.78953923 | 1.07588076 | 0.8590786 |
| A_52_P6153 | 2623     | Detected   | 2992.4   | Detected   | 2859.1   | Detected   | 2593.3   | Detected   | Mrps27        | 0.988677087 | 1.09001144 | 0.86662879 | 0.9554538 |
| A_55_P1965 | 2763.7   | Detected   | 3340.9   | Detected   | 3621.4   | Detected   | 2732.4   | Detected   | Fbxl5         | 0.988674603 | 1.31034483 | 0.81786345 | 1.0839594 |
| A_55_P2153 | 5524.6   | Detected   | 4008.8   | Detected   | 4623     | Detected   | 5462     | Detected   | Irak1         | 0.988668863 | 0.83680266 | 1.36250249 | 1.1532129 |
| A_52_P3024 | 1658     | Detected   | 1585.4   | Detected   | 2069.2   | Detected   | 1639.2   | Detected   | Arl5a         | 0.988661037 | 1.24800965 | 1.03393465 | 1.3051596 |
| A_52_P4446 | 3700.5   | Detected   | 3903.5   | Detected   | 3906.8   | Detected   | 3658.4   | Detected   | Zfp277        | 0.988623159 | 1.05574922 | 0.9372102  | 1.0008454 |
| A_52_P2926 | 11610.3  | Detected   | 12172.9  | Detected   | 13297.7  | Detected   | 11477.7  | Detected   | Exosc4        | 0.988579106 | 1.14533647 | 0.94288953 | 1.092402  |
| A_55_P2100 | 52.3     | Detected   | 43.2     | Detected   | 41.4     | Detected   | 51.7     | Detected   | Defb30        | 0.988527725 | 0.791587   | 1.19675926 | 0.9583333 |
| A_51_P4078 | 3474.3   | Detected   | 2860.4   | Detected   | 2606.1   | Detected   | 3434     | Detected   | Fam193b       | 0.988400541 | 0.75010794 | 1.20053139 | 0.9110964 |

|            |          |          |          |            |          |          |          |            |               |             |            |            |           |
|------------|----------|----------|----------|------------|----------|----------|----------|------------|---------------|-------------|------------|------------|-----------|
| A_52_P3411 | 275      | Detected | 180.3    | Detected   | 267.8    | Detected | 271.8    | Detected   | H13           | 0.988363636 | 0.97381818 | 1.50748752 | 1.4853023 |
| A_55_P2185 | 25132.5  | Detected | 23500.4  | Detected   | 24140.5  | Detected | 24838.8  | Detected   | Copa          | 0.988313936 | 0.9605292  | 1.05695222 | 1.0272378 |
| A_55_P2073 | 77       | Detected | 68       | Detected   | 56.7     | Detected | 76.1     | Detected   | Ocm           | 0.988311688 | 0.73636364 | 1.11911765 | 0.8338235 |
| A_52_P3773 | 1632.5   | Detected | 1529.1   | Detected   | 1814.4   | Detected | 1613.3   | Detected   | Plekhb2       | 0.988238897 | 1.1114242  | 1.05506507 | 1.1865803 |
| A_55_P2004 | 17       | Detected | 5.1      | Not Detect | 16       | Detected | 16.8     | Not Detect | Xkrx          | 0.988235294 | 0.94117647 | 3.29411765 | 3.1372549 |
| A_55_P2074 | 109.8    | Detected | 85.2     | Detected   | 134.6    | Detected | 108.5    | Detected   | Kcp           | 0.988160291 | 1.22586521 | 1.27347418 | 1.5798122 |
| A_55_P2087 | 4485.4   | Detected | 5102.9   | Detected   | 2577.3   | Detected | 4432.2   | Detected   | Mapre3        | 0.988139296 | 0.57459758 | 0.86856493 | 0.5050657 |
| A_51_P1752 | 1787.3   | Detected | 1627     | Detected   | 1379     | Detected | 1766.1   | Detected   | Rps6kb1       | 0.988138533 | 0.77155486 | 1.08549478 | 0.8475722 |
| A_55_P2083 | 21576.2  | Detected | 18713.7  | Detected   | 30934.1  | Detected | 21320    | Detected   | Sac3d1        | 0.988125805 | 1.433714   | 1.1392723  | 1.6530189 |
| A_51_P1160 | 452.9    | Detected | 488.1    | Detected   | 399.1    | Detected | 447.5    | Detected   | Hdac2         | 0.988076838 | 0.88120998 | 0.91682032 | 0.8176603 |
| A_55_P2340 | 2144.8   | Detected | 1162.1   | Detected   | 1915.1   | Detected | 2119.2   | Detected   | BC062258      | 0.988064155 | 0.89290377 | 1.82359522 | 1.6479649 |
| A_51_P3338 | 3618.7   | Detected | 3537.8   | Detected   | 802.9    | Detected | 3575.4   | Detected   | Ndn12         | 0.988034377 | 0.22187526 | 1.01062807 | 0.226949  |
| A_55_P2174 | 599.2    | Detected | 493.3    | Detected   | 538.9    | Detected | 592      | Detected   | Stx17         | 0.987983979 | 0.89936582 | 1.20008109 | 1.0924387 |
| A_55_P2109 | 158389.3 | Detected | 145168.2 | Detected   | 190915.1 | Detected | 156476.1 | Detected   | Rps3          | 0.987920901 | 1.20535352 | 1.07789516 | 1.3151303 |
| A_55_P2211 | 16.5     | Detected | 17.9     | Detected   | 21.4     | Detected | 16.3     | Not Detect | C330022C24Rik | 0.987878788 | 1.2969697  | 0.91061453 | 1.1955307 |
| A_55_P2057 | 3085.1   | Detected | 4293.4   | Detected   | 3547.9   | Detected | 3047.7   | Detected   | Pex5          | 0.987877216 | 1.15001134 | 0.70985699 | 0.8263614 |
| A_55_P2063 | 107.2    | Detected | 101.5    | Detected   | 97.4     | Detected | 105.9    | Detected   | Gm2568        | 0.987873134 | 0.90858209 | 1.04334975 | 0.9596059 |
| A_52_P1234 | 5674.2   | Detected | 6477.1   | Detected   | 5494.2   | Detected | 5605.1   | Detected   | Dnaaf2        | 0.987822072 | 0.96827747 | 0.86537185 | 0.84825   |
| A_52_P6387 | 279      | Detected | 259.5    | Detected   | 270.7    | Detected | 275.6    | Detected   | Mipol1        | 0.98781362  | 0.9702509  | 1.06204239 | 1.0431599 |
| A_51_P2111 | 106.5    | Detected | 86.8     | Detected   | 89.9     | Detected | 105.2    | Detected   | 1110037F02Rik | 0.987793427 | 0.84413146 | 1.21198157 | 1.0357143 |
| A_55_P1954 | 183379.7 | Detected | 228848.8 | Detected   | 178005.5 | Detected | 181141.2 | Detected   | Npm1          | 0.987793087 | 0.97069359 | 0.79153223 | 0.7778302 |
| A_55_P2153 | 5781.5   | Detected | 6366.5   | Detected   | 5756.3   | Detected | 5710.9   | Detected   | Fgr1op        | 0.987788636 | 0.99564127 | 0.89702348 | 0.9041546 |
| A_52_P6090 | 11626.5  | Detected | 10901.5  | Detected   | 13714.6  | Detected | 11484.2  | Detected   | Cenpw         | 0.987760719 | 1.17959833 | 1.05345136 | 1.2580471 |
| A_51_P3219 | 15838.8  | Detected | 9766.8   | Detected   | 16583.7  | Detected | 15643.7  | Detected   | Ssna1         | 0.987682148 | 1.04703008 | 1.60172216 | 1.6979666 |
| A_55_P2169 | 153.7    | Detected | 176.6    | Detected   | 165.7    | Detected | 151.8    | Detected   | Ccdc23        | 0.987638256 | 1.07807417 | 0.85956965 | 0.9382786 |
| A_55_P2021 | 105.1    | Detected | 98.2     | Detected   | 102      | Detected | 103.8    | Detected   | Crlf3         | 0.987630828 | 0.97050428 | 1.05702648 | 1.0386965 |
| A_55_P2096 | 1810.1   | Detected | 1780.4   | Detected   | 1637.2   | Detected | 1787.4   | Detected   | Icmt          | 0.987459256 | 0.90448042 | 1.0039317  | 0.9195686 |
| A_51_P5134 | 2049.8   | Detected | 2232.9   | Detected   | 2323.2   | Detected | 2023.9   | Detected   | Pogz          | 0.987364621 | 1.13337887 | 0.90639975 | 1.0404407 |
| A_51_P4109 | 8980.2   | Detected | 6071.6   | Detected   | 9463.2   | Detected | 8866.7   | Detected   | Tor4a         | 0.987361083 | 1.05378499 | 1.46035641 | 1.5586007 |
| A_55_P2005 | 281730.5 | Detected | 271916.7 | Detected   | 268042.9 | Detected | 278157.5 | Detected   | Gm5621        | 0.987317667 | 0.95141598 | 1.02295115 | 0.9857537 |
| A_55_P2186 | 3971.2   | Detected | 4051.4   | Detected   | 4898     | Detected | 3920.7   | Detected   | Hars2         | 0.987283441 | 1.23338034 | 0.96773955 | 1.2089648 |
| A_66_P1106 | 322      | Detected | 269.6    | Detected   | 308.2    | Detected | 317.9    | Detected   | Odf3l2        | 0.987267081 | 0.95714286 | 1.1791543  | 1.1431751 |
| A_51_P4363 | 5865.9   | Detected | 5065.6   | Detected   | 5819.1   | Detected | 5791.1   | Detected   | Qrich1        | 0.987248334 | 0.99202168 | 1.14322094 | 1.1487484 |
| A_51_P4657 | 44885.3  | Detected | 47425.2  | Detected   | 49140.7  | Detected | 44311.5  | Detected   | Ruvbl1        | 0.987216305 | 1.09480609 | 0.93434503 | 1.0361728 |
| A_52_P9012 | 12690.6  | Detected | 13969.7  | Detected   | 13367.9  | Detected | 12528.1  | Detected   | Prep          | 0.987195247 | 1.05337021 | 0.89680523 | 0.9569211 |
| A_55_P2061 | 311.3    | Detected | 445.1    | Detected   | 217.5    | Detected | 307.3    | Detected   | Rhobtb3       | 0.987150659 | 0.69868294 | 0.69040665 | 0.4886542 |
| A_55_P2173 | 5210.2   | Detected | 5061.4   | Detected   | 6863     | Detected | 5142.8   | Detected   | Ebpl          | 0.987063836 | 1.31722391 | 1.01608251 | 1.3559489 |
| A_55_P2169 | 168238.6 | Detected | 152481.5 | Detected   | 181385.8 | Detected | 166047.2 | Detected   | Rps17         | 0.986974452 | 1.07814616 | 1.0889662  | 1.1895594 |
| A_55_P2130 | 6345.2   | Detected | 6840.8   | Detected   | 4443.9   | Detected | 6262     | Detected   | Parp10        | 0.986887726 | 0.70035617 | 0.91539001 | 0.649617  |
| A_55_P2121 | 30.5     | Detected | 32.6     | Detected   | 147.9    | Detected | 30.1     | Not Detect | Nuggc         | 0.986885246 | 4.84918033 | 0.92331288 | 4.5368098 |

|            |          |            |          |            |          |            |          |            |               |             |            |            |           |
|------------|----------|------------|----------|------------|----------|------------|----------|------------|---------------|-------------|------------|------------|-----------|
| A_55_P2164 | 5291.8   | Detected   | 5407     | Detected   | 4315.2   | Detected   | 5221.9   | Detected   | Sfpq          | 0.986790884 | 0.81545032 | 0.9657666  | 0.7980766 |
| A_51_P2245 | 6515.4   | Detected   | 5608.9   | Detected   | 5023.5   | Detected   | 6429     | Detected   | Jade1         | 0.98673911  | 0.77101943 | 1.14621405 | 0.8956302 |
| A_52_P5839 | 5869.8   | Detected   | 5477.4   | Detected   | 5334.7   | Detected   | 5791.7   | Detected   | Lrpap1        | 0.986694606 | 0.90883846 | 1.05738124 | 0.9739475 |
| A_55_P2085 | 59.9     | Detected   | 45.7     | Detected   | 35.2     | Detected   | 59.1     | Detected   | Gm4461        | 0.986644407 | 0.58764608 | 1.29321663 | 0.7702407 |
| A_66_P1203 | 14.9     | Detected   | 13.9     | Not Detect | 15.8     | Not Detect | 14.7     | Not Detect | Apol10b       | 0.986577181 | 1.06040268 | 1.05755396 | 1.1366906 |
| A_55_P2083 | 9005     | Detected   | 8374.8   | Detected   | 10360.5  | Detected   | 8883.4   | Detected   | Gm6917        | 0.986496391 | 1.15052748 | 1.06072981 | 1.2371042 |
| A_51_P1480 | 8227.5   | Detected   | 8250.1   | Detected   | 6544.7   | Detected   | 8116.2   | Detected   | Lpgat1        | 0.986472197 | 0.79546642 | 0.98376989 | 0.7932874 |
| A_55_P2070 | 3432.4   | Detected   | 2573.9   | Detected   | 2846.4   | Detected   | 3385.9   | Detected   | Ino80d        | 0.986452628 | 0.82927398 | 1.31547457 | 1.1058705 |
| A_51_P2655 | 3722.9   | Detected   | 3179.3   | Detected   | 2965.1   | Detected   | 3672.4   | Detected   | Tmem57        | 0.986435306 | 0.796449   | 1.15509703 | 0.9326267 |
| A_51_P4765 | 1730.7   | Detected   | 1209.7   | Detected   | 1008.8   | Detected   | 1707.2   | Detected   | Zbtb38        | 0.986421679 | 0.58288554 | 1.41125899 | 0.8339258 |
| A_55_P2131 | 88.3     | Detected   | 76.9     | Detected   | 86.7     | Detected   | 87.1     | Detected   | Tamm41        | 0.986409966 | 0.98187995 | 1.13263979 | 1.1274382 |
| A_55_P2126 | 58.8     | Detected   | 59       | Detected   | 99       | Detected   | 58       | Detected   | Ssmem1        | 0.986394558 | 1.68367347 | 0.98305085 | 1.6779661 |
| A_51_P4558 | 23316.1  | Detected   | 19374.1  | Detected   | 17085.3  | Detected   | 22997.4  | Detected   | Fam64a        | 0.986331333 | 0.73276834 | 1.18701772 | 0.8818629 |
| A_51_P1008 | 14032    | Detected   | 11292.5  | Detected   | 16501.3  | Detected   | 13840    | Detected   | Prdx3         | 0.98631699  | 1.17597634 | 1.22559221 | 1.4612619 |
| A_52_P3848 | 101.9    | Detected   | 141      | Detected   | 149.4    | Detected   | 100.5    | Detected   | Taok2         | 0.98626104  | 1.46614328 | 0.71276596 | 1.0595745 |
| A_55_P2179 | 16722    | Detected   | 15644.5  | Detected   | 21380    | Detected   | 16492.2  | Detected   | Ostf1         | 0.986257625 | 1.2785552  | 1.05418518 | 1.3666145 |
| A_55_P2077 | 834      | Detected   | 368.1    | Detected   | 830      | Detected   | 822.5    | Detected   | Ahdc1         | 0.986211031 | 0.99520384 | 2.23444716 | 2.2548221 |
| A_52_P3629 | 28.9     | Detected   | 32.2     | Detected   | 11.8     | Not Detect | 28.5     | Not Detect | Pfkfb3        | 0.98615917  | 0.4083045  | 0.88509317 | 0.3664596 |
| A_66_P1391 | 433237.4 | Detected   | 442760.9 | Detected   | 460859.9 | Detected   | 427172.8 | Detected   | Rpl8          | 0.98600167  | 1.06375835 | 0.96479341 | 1.0408776 |
| A_55_P2041 | 19609.1  | Detected   | 18425.7  | Detected   | 21476.3  | Detected   | 19334.4  | Detected   | Csnk1g2       | 0.985991198 | 1.0952211  | 1.04931699 | 1.1655622 |
| A_55_P2103 | 1983.6   | Detected   | 1963.9   | Detected   | 1474.5   | Detected   | 1955.8   | Detected   | Irf2bpl       | 0.985985078 | 0.74334543 | 0.99587555 | 0.750802  |
| A_55_P2021 | 484      | Detected   | 528.7    | Detected   | 499.3    | Detected   | 477.2    | Detected   | Zfp248        | 0.985950413 | 1.03161157 | 0.90259126 | 0.9443919 |
| A_66_P1115 | 134.5    | Detected   | 118.2    | Detected   | 100.6    | Detected   | 132.6    | Detected   | 5430431A17Rik | 0.985873606 | 0.74795539 | 1.12182741 | 0.8510998 |
| A_55_P2022 | 3273.4   | Detected   | 2820.2   | Detected   | 2490.9   | Detected   | 3227.1   | Detected   | Lbh           | 0.985855685 | 0.76095192 | 1.14428055 | 0.8832352 |
| A_55_P2061 | 19916.3  | Detected   | 11488.1  | Detected   | 25874.9  | Detected   | 19634.2  | Detected   | Wbp5          | 0.985835722 | 1.29918208 | 1.70909028 | 2.252322  |
| A_52_P5190 | 14.1     | Not Detect | 18.8     | Not Detect | 22.2     | Detected   | 13.9     | Not Detect | Slc36a3       | 0.985815603 | 1.57446809 | 0.7393617  | 1.1808511 |
| A_66_P1115 | 1346     | Detected   | 1084.3   | Detected   | 1262.3   | Detected   | 1326.9   | Detected   | Fam122b       | 0.985809807 | 0.93781575 | 1.22373882 | 1.1641612 |
| A_65_P1567 | 4481.7   | Detected   | 4277     | Detected   | 4011.6   | Detected   | 4418.1   | Detected   | Ipo9          | 0.985808956 | 0.89510677 | 1.03299041 | 0.9379472 |
| A_55_P1979 | 97.9     | Detected   | 161.5    | Detected   | 74.1     | Detected   | 96.5     | Detected   | LOC101055842  | 0.985699694 | 0.75689479 | 0.59752322 | 0.4588235 |
| A_55_P2092 | 5850.3   | Detected   | 4843.7   | Detected   | 5313.2   | Detected   | 5766.3   | Detected   | Med1          | 0.985641762 | 0.90819274 | 1.19047422 | 1.09693   |
| A_55_P2012 | 79072.4  | Detected   | 73777.9  | Detected   | 82128.2  | Detected   | 77936.8  | Detected   | Ndufb11       | 0.985638478 | 1.0386456  | 1.05637054 | 1.1131816 |
| A_55_P2186 | 13.9     | Detected   | 21.7     | Detected   | 12.3     | Not Detect | 13.7     | Not Detect | 2300003K06Rik | 0.985611511 | 0.88489209 | 0.63133641 | 0.5668203 |
| A_55_P2104 | 1430.2   | Detected   | 1291.9   | Detected   | 1138.9   | Detected   | 1409.6   | Detected   | Vma21         | 0.98559642  | 0.79632219 | 1.09110612 | 0.8815698 |
| A_55_P2015 | 20.8     | Detected   | 19.8     | Detected   | 14.6     | Not Detect | 20.5     | Not Detect | Auts2         | 0.985576923 | 0.70192308 | 1.03535354 | 0.7373737 |
| A_52_P6476 | 990.5    | Detected   | 994      | Detected   | 910.6    | Detected   | 976.2    | Detected   | Gen1          | 0.985562847 | 0.91933367 | 0.98209256 | 0.9160966 |
| A_55_P2158 | 44413.9  | Detected   | 41799.9  | Detected   | 46437.6  | Detected   | 43769.4  | Detected   | Glr3          | 0.985488777 | 1.04556456 | 1.04711734 | 1.11095   |
| A_55_P2047 | 2077.7   | Detected   | 1721.1   | Detected   | 1728.6   | Detected   | 2047.5   | Detected   | Ccp110        | 0.985464697 | 0.83197767 | 1.18964616 | 1.0043577 |
| A_51_P4919 | 4174.5   | Detected   | 2538.8   | Detected   | 4606.2   | Detected   | 4113.7   | Detected   | Rassf6        | 0.985435381 | 1.10341358 | 1.62033244 | 1.8143217 |
| A_51_P5097 | 50293.9  | Detected   | 31144.3  | Detected   | 42587.4  | Detected   | 49560.7  | Detected   | Actr1a        | 0.985421691 | 0.84677068 | 1.5913249  | 1.367422  |
| A_51_P3733 | 8487.5   | Detected   | 9955.4   | Detected   | 10096    | Detected   | 8363.4   | Detected   | Med4          | 0.985378498 | 1.18951399 | 0.84008679 | 1.014123  |

|            |          |          |          |            |          |            |          |            |               |             |            |            |           |
|------------|----------|----------|----------|------------|----------|------------|----------|------------|---------------|-------------|------------|------------|-----------|
| A_52_P3542 | 2178.7   | Detected | 2156.2   | Detected   | 1922.6   | Detected   | 2146.7   | Detected   | 2310057M21Rik | 0.985312342 | 0.88245284 | 0.9955941  | 0.8916613 |
| A_55_P2021 | 27.2     | Detected | 27.7     | Detected   | 5.1      | Not Detect | 26.8     | Not Detect | Tigd4         | 0.985294118 | 0.1875     | 0.96750903 | 0.1841155 |
| A_55_P1985 | 805.2    | Detected | 629.9    | Detected   | 592.4    | Detected   | 793.2    | Detected   | Krtap5-3      | 0.98509687  | 0.73571783 | 1.2592475  | 0.9404667 |
| A_51_P3322 | 104343.6 | Detected | 57908.5  | Detected   | 76428.5  | Detected   | 102784.1 | Detected   | Cst3          | 0.985054186 | 0.73246946 | 1.77493978 | 1.3198149 |
| A_51_P2986 | 4097.8   | Detected | 3034.9   | Detected   | 3661.1   | Detected   | 4035.9   | Detected   | Scaf4         | 0.984894334 | 0.89343062 | 1.32982965 | 1.206333  |
| A_55_P2177 | 152299.6 | Detected | 107305.4 | Detected   | 165945   | Detected   | 149996.4 | Detected   | Sod1          | 0.984877176 | 1.08959577 | 1.39784577 | 1.5464739 |
| A_51_P4243 | 919.8    | Detected | 1102.7   | Detected   | 705.7    | Detected   | 905.8    | Detected   | Nqo1          | 0.9847793   | 0.76723201 | 0.82143829 | 0.6399746 |
| A_55_P2088 | 4209.9   | Detected | 5619.7   | Detected   | 4262.5   | Detected   | 4145.8   | Detected   | Spata5        | 0.984773985 | 1.01249436 | 0.73772621 | 0.7584924 |
| A_55_P2146 | 45.9     | Detected | 40.1     | Detected   | 40.2     | Detected   | 45.2     | Not Detect | Syngap1       | 0.984749455 | 0.87581699 | 1.12718204 | 1.0024938 |
| A_51_P4803 | 26       | Detected | 17.6     | Not Detect | 6.4      | Not Detect | 25.6     | Not Detect | Usp24         | 0.984615385 | 0.24615385 | 1.45454545 | 0.3636364 |
| A_52_P4864 | 615.9    | Detected | 432.6    | Detected   | 572.3    | Detected   | 606.4    | Detected   | R3hcc1l       | 0.984575418 | 0.92920929 | 1.40175682 | 1.3229311 |
| A_55_P1960 | 32.4     | Detected | 20.8     | Detected   | 19.4     | Detected   | 31.9     | Not Detect | Gm608         | 0.984567901 | 0.59876543 | 1.53365385 | 0.9326923 |
| A_55_P2124 | 1042.6   | Detected | 795.7    | Detected   | 872.1    | Detected   | 1026.5   | Detected   | Ttc7          | 0.984557836 | 0.83646653 | 1.29005907 | 1.0960161 |
| A_55_P2121 | 1195.9   | Detected | 1006     | Detected   | 1419.2   | Detected   | 1177.4   | Detected   | Hist1h3i      | 0.984530479 | 1.1867213  | 1.17037773 | 1.4107356 |
| A_55_P1967 | 35340    | Detected | 34841.7  | Detected   | 38542.6  | Detected   | 34788.3  | Detected   | Chtop         | 0.984388795 | 1.09062252 | 0.99846735 | 1.1062204 |
| A_52_P4727 | 14183.6  | Detected | 15397.9  | Detected   | 13820.4  | Detected   | 13961.8  | Detected   | Ecd           | 0.984362221 | 0.97439296 | 0.90673404 | 0.897551  |
| A_55_P2017 | 25.5     | Detected | 597.4    | Detected   | 3.8      | Not Detect | 25.1     | Not Detect | Myb           | 0.984313725 | 0.14901961 | 0.0420154  | 0.0063609 |
| A_52_P1209 | 2428.8   | Detected | 2489     | Detected   | 2277.7   | Detected   | 2390.7   | Detected   | Metap1        | 0.984313241 | 0.93778821 | 0.96050623 | 0.9151065 |
| A_55_P1973 | 1104.3   | Detected | 1113     | Detected   | 1157.9   | Detected   | 1086.9   | Detected   | Socs4         | 0.984243412 | 1.04853754 | 0.97654987 | 1.0403414 |
| A_55_P2005 | 12726.8  | Detected | 9455.7   | Detected   | 8898.1   | Detected   | 12525.9  | Detected   | Dennd5a       | 0.984214414 | 0.6991624  | 1.32469304 | 0.9410303 |
| A_51_P4728 | 19       | Detected | 12.3     | Not Detect | 3.7      | Not Detect | 18.7     | Not Detect | Oas3          | 0.984210526 | 0.19473684 | 1.5203252  | 0.300813  |
| A_66_P1052 | 235567.9 | Detected | 239565.4 | Detected   | 249227.7 | Detected   | 231830.4 | Detected   | Rplp0         | 0.984134086 | 1.05798668 | 0.96771237 | 1.0403326 |
| A_51_P2269 | 3369.7   | Detected | 2640.2   | Detected   | 2953.6   | Detected   | 3316.1   | Detected   | Tubgcp2       | 0.984093539 | 0.8765172  | 1.25600333 | 1.1187031 |
| A_51_P4192 | 44       | Detected | 40       | Detected   | 33.5     | Detected   | 43.3     | Not Detect | 5830416P10Rik | 0.984090909 | 0.76136364 | 1.0825     | 0.8375    |
| A_55_P2014 | 1402.7   | Detected | 1312.8   | Detected   | 1091.2   | Detected   | 1380.3   | Detected   | Gm8457        | 0.984030798 | 0.77792828 | 1.05141682 | 0.8312005 |
| A_55_P2148 | 3111.8   | Detected | 3402.4   | Detected   | 2077     | Detected   | 3062.1   | Detected   | 2610005L07Rik | 0.984028537 | 0.66745935 | 0.89998237 | 0.6104514 |
| A_55_P2403 | 124.8    | Detected | 138.2    | Detected   | 137.8    | Detected   | 122.8    | Detected   | Ssh2          | 0.983974359 | 1.10416667 | 0.88856729 | 0.9971056 |
| A_51_P4923 | 1559.4   | Detected | 1570.4   | Detected   | 1588.4   | Detected   | 1534.4   | Detected   | Tmem174       | 0.983968193 | 1.0185969  | 0.9770759  | 1.011462  |
| A_55_P2115 | 40314.3  | Detected | 46377.8  | Detected   | 47131.5  | Detected   | 39666.9  | Detected   | Psmb5         | 0.983941182 | 1.16910129 | 0.8552993  | 1.0162513 |
| A_66_P1370 | 14612.2  | Detected | 12891.4  | Detected   | 19111    | Detected   | 14374.5  | Detected   | Men1          | 0.983732771 | 1.30787972 | 1.11504569 | 1.4824612 |
| A_55_P2184 | 344.2    | Detected | 336.4    | Detected   | 324      | Detected   | 338.6    | Detected   | Hint1         | 0.983730389 | 0.94131319 | 1.00653983 | 0.9631391 |
| A_55_P2415 | 24.5     | Detected | 36.8     | Detected   | 31.6     | Detected   | 24.1     | Not Detect | 4930592A05Rik | 0.983673469 | 1.28979592 | 0.6548913  | 0.8586957 |
| A_51_P4078 | 1154     | Detected | 1053.9   | Detected   | 303.8    | Detected   | 1135     | Detected   | 1700020D05Rik | 0.983535529 | 0.26325823 | 1.07695227 | 0.2882626 |
| A_55_P2011 | 84.8     | Detected | 51.6     | Detected   | 27.7     | Detected   | 83.4     | Detected   | BC061237      | 0.983490566 | 0.32665094 | 1.61627907 | 0.5368217 |
| A_55_P2021 | 695.8    | Detected | 434      | Detected   | 657.7    | Detected   | 684.3    | Detected   | Abca2         | 0.983472262 | 0.94524289 | 1.57672811 | 1.5154378 |
| A_52_P2180 | 1394.7   | Detected | 1743.3   | Detected   | 1690.3   | Detected   | 1371.6   | Detected   | Wdr36         | 0.983437298 | 1.21194522 | 0.78678369 | 0.9695979 |
| A_55_P1992 | 24.1     | Detected | 122.4    | Detected   | 21.8     | Detected   | 23.7     | Not Detect | Serpig1       | 0.98340249  | 0.90456432 | 0.19362745 | 0.1781046 |
| A_66_P1215 | 1529.9   | Detected | 1050.1   | Detected   | 1504.5   | Detected   | 1504.5   | Detected   | Gm7120        | 0.983397608 | 0.98339761 | 1.43272069 | 1.4327207 |
| A_55_P1993 | 2508.1   | Detected | 2466.9   | Detected   | 2278.7   | Detected   | 2465.8   | Detected   | Psip1         | 0.983134644 | 0.90853634 | 0.9995541  | 0.9237099 |
| A_55_P2130 | 153485.5 | Detected | 174934.6 | Detected   | 165067.1 | Detected   | 150892.3 | Detected   | Nhp2          | 0.983104593 | 1.07545729 | 0.86256407 | 0.9435932 |

|            |          |          |          |          |          |            |          |            |               |             |            |            |           |
|------------|----------|----------|----------|----------|----------|------------|----------|------------|---------------|-------------|------------|------------|-----------|
| A_55_P2119 | 206952.4 | Detected | 200845.8 | Detected | 244095.7 | Detected   | 203451.2 | Detected   | Eef1g         | 0.9830821   | 1.1794775  | 1.01297214 | 1.2153388 |
| A_51_P4279 | 53.1     | Detected | 2217.9   | Detected | 69.6     | Detected   | 52.2     | Detected   | Lmod3         | 0.983050847 | 1.31073446 | 0.02353578 | 0.031381  |
| A_52_P3254 | 1185.6   | Detected | 1006.6   | Detected | 1053.4   | Detected   | 1165.5   | Detected   | Trim16        | 0.983046559 | 0.88849528 | 1.15785814 | 1.0464931 |
| A_52_P6123 | 23364.6  | Detected | 14193.1  | Detected | 20303.1  | Detected   | 22968    | Detected   | Cdc25b        | 0.983025603 | 0.86896844 | 1.61825112 | 1.4304909 |
| A_55_P2050 | 14422    | Detected | 7848.2   | Detected | 9729.2   | Detected   | 14176.9  | Detected   | Plekhhg2      | 0.983005131 | 0.67460824 | 1.80638873 | 1.2396728 |
| A_66_P1274 | 11278.2  | Detected | 8615.7   | Detected | 11301.8  | Detected   | 11086.4  | Detected   | Abcf3         | 0.98299374  | 1.00209253 | 1.28676718 | 1.3117681 |
| A_55_P2184 | 663.7    | Detected | 589.8    | Detected | 634      | Detected   | 652.4    | Detected   | Lbr           | 0.982974235 | 0.95525087 | 1.10613767 | 1.0749407 |
| A_55_P1953 | 70.3     | Detected | 76       | Detected | 55.4     | Detected   | 69.1     | Detected   | Cdkl3         | 0.982930299 | 0.78805121 | 0.90921053 | 0.7289474 |
| A_55_P2108 | 181.6    | Detected | 180      | Detected | 157.7    | Detected   | 178.5    | Detected   | Sp100         | 0.982929515 | 0.86839207 | 0.99166667 | 0.8761111 |
| A_55_P1960 | 34.9     | Detected | 29.2     | Detected | 16.1     | Not Detect | 34.3     | Not Detect | Lrrc23        | 0.982808023 | 0.46131805 | 1.17465753 | 0.5513699 |
| A_55_P2121 | 3196.4   | Detected | 1917.6   | Detected | 1850.1   | Detected   | 3141.4   | Detected   | Cdk5          | 0.982793142 | 0.57880741 | 1.63819358 | 0.9647997 |
| A_55_P1970 | 374927.6 | Detected | 343583.8 | Detected | 343245.2 | Detected   | 368473.5 | Detected   | Actg1         | 0.982785743 | 0.91549729 | 1.07244142 | 0.9990145 |
| A_55_P2014 | 46.3     | Detected | 50.4     | Detected | 38.5     | Detected   | 45.5     | Not Detect | Cntln         | 0.982721382 | 0.83153348 | 0.90277778 | 0.7638889 |
| A_55_P2149 | 351711.8 | Detected | 350623.5 | Detected | 371695.9 | Detected   | 345626.7 | Detected   | Rpl32         | 0.982698619 | 1.05681953 | 0.98574882 | 1.0600998 |
| A_55_P2259 | 501.9    | Detected | 399.3    | Detected | 342.7    | Detected   | 493.2    | Detected   | D130012P04Rik | 0.98266587  | 0.68280534 | 1.23516153 | 0.8582519 |
| A_52_P3293 | 581.1    | Detected | 711.7    | Detected | 709.7    | Detected   | 571      | Detected   | Chka          | 0.982619171 | 1.22130442 | 0.80230434 | 0.9971898 |
| A_55_P2003 | 369823.9 | Detected | 395113.5 | Detected | 393370.5 | Detected   | 363389   | Detected   | Gm13215       | 0.982600097 | 1.06366976 | 0.91970788 | 0.9955886 |
| A_55_P2113 | 63       | Detected | 45.3     | Detected | 50.5     | Detected   | 61.9     | Detected   | Gm9776        | 0.982539683 | 0.8015873  | 1.36644592 | 1.1147903 |
| A_55_P2177 | 4269.5   | Detected | 3706.9   | Detected | 5038.6   | Detected   | 4194.5   | Detected   | Lepr          | 0.98243354  | 1.18013819 | 1.13153848 | 1.359249  |
| A_51_P2927 | 17736.2  | Detected | 15915    | Detected | 19284.9  | Detected   | 17424.3  | Detected   | Yaf2          | 0.982414497 | 1.08731859 | 1.09483506 | 1.2117436 |
| A_52_P3186 | 454.9    | Detected | 432.8    | Detected | 382.8    | Detected   | 446.9    | Detected   | Saa1          | 0.982413717 | 0.84150363 | 1.03257856 | 0.8844732 |
| A_55_P2143 | 10430.9  | Detected | 9339.8   | Detected | 12881.9  | Detected   | 10246.9  | Detected   | Men1          | 0.982360103 | 1.23497493 | 1.09712199 | 1.3792479 |
| A_55_P2129 | 116251.9 | Detected | 92924.6  | Detected | 127579.5 | Detected   | 114195   | Detected   | Calm2         | 0.982306526 | 1.09744013 | 1.22889956 | 1.3729357 |
| A_51_P3900 | 1811.9   | Detected | 1743.8   | Detected | 2083.5   | Detected   | 1779.8   | Detected   | Styx          | 0.98228379  | 1.1498979  | 1.02064457 | 1.1948045 |
| A_66_P1254 | 1154.3   | Detected | 1022     | Detected | 1152.2   | Detected   | 1133.8   | Detected   | Chm           | 0.982240319 | 0.99818072 | 1.10939335 | 1.1273973 |
| A_55_P1957 | 8039.2   | Detected | 6694.9   | Detected | 6309.1   | Detected   | 7896     | Detected   | Mtfr11        | 0.982187282 | 0.78479202 | 1.17940522 | 0.942374  |
| A_55_P1953 | 34095.4  | Detected | 41519.4  | Detected | 41412.3  | Detected   | 33486.2  | Detected   | Pdhh          | 0.982132487 | 1.2146008  | 0.80651936 | 0.9974205 |
| A_55_P2112 | 15514.8  | Detected | 13049.8  | Detected | 16695.1  | Detected   | 15237    | Detected   | Smad4         | 0.982094516 | 1.07607575 | 1.1676041  | 1.2793376 |
| A_55_P1998 | 991      | Detected | 785.2    | Detected | 935.3    | Detected   | 973.2    | Detected   | Deaf1         | 0.982038345 | 0.94379415 | 1.23942944 | 1.1911615 |
| A_55_P1988 | 4992.8   | Detected | 4225.1   | Detected | 4483     | Detected   | 4902.9   | Detected   | Mkks          | 0.981994071 | 0.89789297 | 1.16042224 | 1.06104   |
| A_52_P6348 | 1265.6   | Detected | 1206.8   | Detected | 1191.8   | Detected   | 1242.8   | Detected   | Nap114        | 0.981984829 | 0.94168774 | 1.02983096 | 0.9875704 |
| A_55_P2027 | 16.6     | Detected | 18.8     | Detected | 10.9     | Not Detect | 16.3     | Not Detect | Gm11735       | 0.981927711 | 0.65662651 | 0.86702128 | 0.5797872 |
| A_51_P2331 | 3830.2   | Detected | 3013.3   | Detected | 1866.3   | Detected   | 3760.9   | Detected   | Lysmd2        | 0.98190695  | 0.48725915 | 1.24810009 | 0.6193542 |
| A_51_P2260 | 38193.8  | Detected | 32819.5  | Detected | 48783.2  | Detected   | 37501    | Detected   | Sra1          | 0.98186093  | 1.27725442 | 1.14264386 | 1.486409  |
| A_55_P2143 | 277575.3 | Detected | 240529.8 | Detected | 258187.2 | Detected   | 272526.7 | Detected   | Ubc           | 0.981811782 | 0.93015193 | 1.13302676 | 1.0734104 |
| A_55_P2040 | 38.4     | Detected | 27.1     | Detected | 31.4     | Detected   | 37.7     | Not Detect | Btbd9         | 0.981770833 | 0.81770833 | 1.39114391 | 1.1586716 |
| A_55_P1996 | 27.4     | Detected | 28.1     | Detected | 34       | Detected   | 26.9     | Not Detect | Gm2366        | 0.981751825 | 1.24087591 | 0.95729537 | 1.2099644 |
| A_51_P3229 | 12702.1  | Detected | 14981.4  | Detected | 13065.3  | Detected   | 12470.1  | Detected   | Mrpl22        | 0.981735304 | 1.0285937  | 0.83237214 | 0.8721014 |
| A_55_P2179 | 21.9     | Detected | 15       | Detected | 12.5     | Not Detect | 21.5     | Not Detect | Defb33        | 0.98173516  | 0.57077626 | 1.43333333 | 0.8333333 |
| A_55_P2035 | 7509.6   | Detected | 9096.9   | Detected | 11319.1  | Detected   | 7372.3   | Detected   | Ripk4         | 0.981716736 | 1.50728401 | 0.81041893 | 1.244281  |

|            |                   |                   |                   |                   |               |             |            |            |           |
|------------|-------------------|-------------------|-------------------|-------------------|---------------|-------------|------------|------------|-----------|
| A_55_P2105 | 10.9 Not Detect   | 20.9 Detected     | 13.2 Not Detect   | 10.7 Not Detect   | Adrb3         | 0.981651376 | 1.21100917 | 0.51196172 | 0.6315789 |
| A_52_P2753 | 6312.8 Detected   | 4627.8 Detected   | 5344.1 Detected   | 6196.5 Detected   | Osbp17        | 0.981577113 | 0.84654987 | 1.33897316 | 1.154782  |
| A_55_P1990 | 504.6 Detected    | 474.6 Detected    | 446.6 Detected    | 495.3 Detected    | 4932412D23Rik | 0.98156956  | 0.88505747 | 1.04361568 | 0.9410029 |
| A_51_P4341 | 51533 Detected    | 38445.3 Detected  | 41227.3 Detected  | 50582.7 Detected  | Anapc4        | 0.981559389 | 0.80001746 | 1.31570569 | 1.0723626 |
| A_55_P2000 | 634.2 Detected    | 603.2 Detected    | 465.6 Detected    | 622.5 Detected    | Dusp7         | 0.981551561 | 0.73415326 | 1.03199602 | 0.7718833 |
| A_55_P2341 | 276 Detected      | 242.6 Detected    | 288.9 Detected    | 270.9 Detected    | Crebzf        | 0.981521739 | 1.04673913 | 1.11665293 | 1.1908491 |
| A_55_P2109 | 5089.4 Detected   | 3826.8 Detected   | 4128.7 Detected   | 4994.7 Detected   | Serinc3       | 0.981392699 | 0.81123512 | 1.30518971 | 1.078891  |
| A_51_P2286 | 27134.8 Detected  | 19329.8 Detected  | 5358.5 Detected   | 26626.1 Detected  | Isyna1        | 0.981252856 | 0.19747704 | 1.37746381 | 0.2772145 |
| A_55_P2052 | 8033.9 Detected   | 7314.2 Detected   | 7626.8 Detected   | 7883 Detected     | Morc2a        | 0.981217093 | 0.94932723 | 1.07776654 | 1.0427388 |
| A_52_P1513 | 25504.2 Detected  | 15782.4 Detected  | 33073.6 Detected  | 25024.7 Detected  | Tnfaip8l1     | 0.981199175 | 1.29679033 | 1.58560802 | 2.0956002 |
| A_55_P2418 | 15.9 Detected     | 27 Detected       | 3.2 Not Detect    | 15.6 Not Detect   | D230034L24Rik | 0.981132075 | 0.20125786 | 0.57777778 | 0.1185185 |
| A_52_P2838 | 2257.4 Detected   | 2992.9 Detected   | 2221 Detected     | 2214.8 Detected   | Tapt1         | 0.981128732 | 0.98387525 | 0.74001804 | 0.7420896 |
| A_52_P3758 | 20826.1 Detected  | 19638.4 Detected  | 20872.1 Detected  | 20431.5 Detected  | Srp9          | 0.981052621 | 1.00220877 | 1.04038516 | 1.0628208 |
| A_55_P2229 | 21.1 Detected     | 18.9 Detected     | 19.9 Detected     | 20.7 Not Detect   | 9430014F16Rik | 0.981042654 | 0.94312796 | 1.0952381  | 1.0529101 |
| A_55_P1997 | 22719.3 Detected  | 20420.2 Detected  | 25302.2 Detected  | 22288.2 Detected  | Fbl           | 0.981024944 | 1.11368748 | 1.09147805 | 1.239077  |
| A_55_P2068 | 2364.9 Detected   | 1933.4 Detected   | 1705.5 Detected   | 2319.9 Detected   | Cdk20         | 0.980971711 | 0.72117214 | 1.1999069  | 0.8821248 |
| A_66_P1291 | 355884.5 Detected | 314369.6 Detected | 366820.9 Detected | 349111.5 Detected | Hist2h2ac     | 0.980968545 | 1.03073019 | 1.11051291 | 1.166846  |
| A_51_P3363 | 5450.1 Detected   | 4932.4 Detected   | 5232.6 Detected   | 5345.8 Detected   | Dido1         | 0.980862736 | 0.96009248 | 1.08381315 | 1.0608629 |
| A_55_P1964 | 6519.9 Detected   | 4975.9 Detected   | 6484 Detected     | 6395.1 Detected   | Slc25a38      | 0.980858602 | 0.99449378 | 1.28521474 | 1.3030808 |
| A_55_P2076 | 1159 Detected     | 989.6 Detected    | 820.5 Detected    | 1136.7 Detected   | Ddx5          | 0.980759275 | 0.70793788 | 1.14864592 | 0.8291229 |
| A_55_P2025 | 250710.2 Detected | 266185 Detected   | 267318.8 Detected | 245867.3 Detected | Rps27a        | 0.980683275 | 1.06624621 | 0.92367076 | 1.0042594 |
| A_55_P2081 | 62.1 Detected     | 65 Detected       | 63.8 Detected     | 60.9 Detected     | Prn           | 0.980676329 | 1.0273752  | 0.93692308 | 0.9815385 |
| A_66_P1166 | 36532.4 Detected  | 30010.5 Detected  | 24750.8 Detected  | 35824.9 Detected  | Mafg          | 0.980633629 | 0.67750271 | 1.19374552 | 0.824738  |
| A_51_P2693 | 9833.8 Detected   | 12953.9 Detected  | 11675.5 Detected  | 9643 Detected     | Adsl          | 0.980597531 | 1.18728264 | 0.74440902 | 0.9013116 |
| A_55_P2179 | 10.3 Not Detect   | 32.2 Detected     | 14.9 Not Detect   | 10.1 Not Detect   | Ube2cbp       | 0.980582524 | 1.44660194 | 0.3136646  | 0.4627329 |
| A_55_P2049 | 194.5 Detected    | 233.1 Detected    | 209.1 Detected    | 190.7 Detected    | Otx2          | 0.980462725 | 1.07506427 | 0.81810382 | 0.8970399 |
| A_55_P1955 | 37573.7 Detected  | 27197.3 Detected  | 36472.6 Detected  | 36838 Detected    | Ezr           | 0.980419815 | 0.97069493 | 1.35447269 | 1.3410375 |
| A_52_P1923 | 566.3 Detected    | 517.4 Detected    | 214.8 Detected    | 555.2 Detected    | Rbak          | 0.980399082 | 0.37930426 | 1.0730576  | 0.4151527 |
| A_55_P2171 | 248444.1 Detected | 244478.4 Detected | 270276.2 Detected | 243573.8 Detected | Rps11-ps1     | 0.980396798 | 1.0878753  | 0.99629988 | 1.1055218 |
| A_55_P2175 | 15.3 Detected     | 26.7 Detected     | 20.7 Detected     | 15 Not Detect     | Vmn2r35       | 0.980392157 | 1.35294118 | 0.56179775 | 0.7752809 |
| A_51_P4924 | 16177.4 Detected  | 18644.2 Detected  | 20154.4 Detected  | 15859.7 Detected  | 1110057K04Rik | 0.980361492 | 1.24583678 | 0.8506506  | 1.0810011 |
| A_55_P2087 | 55.9 Detected     | 58.8 Detected     | 59.4 Detected     | 54.8 Detected     | Lypd6         | 0.980322004 | 1.06261181 | 0.93197279 | 1.0102041 |
| A_55_P2081 | 166.5 Detected    | 335.3 Detected    | 111 Detected      | 163.2 Detected    | Gm13043       | 0.98018018  | 0.66666667 | 0.4867283  | 0.3310468 |
| A_55_P1994 | 1139.7 Detected   | 920.2 Detected    | 1293.9 Detected   | 1117 Detected     | Tpd52l2       | 0.980082478 | 1.13529876 | 1.21386655 | 1.4061074 |
| A_51_P4385 | 30.1 Detected     | 15.2 Not Detect   | 23.9 Detected     | 29.5 Not Detect   | Steap2        | 0.980066445 | 0.79401993 | 1.94078947 | 1.5723684 |
| A_55_P2127 | 47844.4 Detected  | 47137.1 Detected  | 50872.9 Detected  | 46887.5 Detected  | 4933434E20Rik | 0.979999749 | 1.06329894 | 0.99470481 | 1.0792539 |
| A_51_P4674 | 242169.3 Detected | 298803.8 Detected | 240098.7 Detected | 237318.1 Detected | Npm1          | 0.979967733 | 0.99144978 | 0.79422718 | 0.803533  |
| A_55_P2048 | 44.7 Detected     | 40.6 Detected     | 30.1 Detected     | 43.8 Not Detect   | Ccdc17        | 0.979865772 | 0.67337808 | 1.07881773 | 0.7413793 |
| A_51_P3849 | 9.9 Not Detect    | 25.2 Detected     | 4.5 Not Detect    | 9.7 Not Detect    | Grik4         | 0.97979798  | 0.45454545 | 0.38492063 | 0.1785714 |
| A_55_P2021 | 459.7 Detected    | 376.2 Detected    | 511.2 Detected    | 450.4 Detected    | Abcb7         | 0.979769415 | 1.11202958 | 1.19723551 | 1.3588517 |

|            |          |          |          |          |          |            |          |            |               |             |            |            |           |
|------------|----------|----------|----------|----------|----------|------------|----------|------------|---------------|-------------|------------|------------|-----------|
| A_55_P2177 | 9432.6   | Detected | 7674.2   | Detected | 6019.3   | Detected   | 9241.5   | Detected   | Mafg          | 0.979740475 | 0.63813795 | 1.20422976 | 0.7843554 |
| A_55_P2036 | 1232.2   | Detected | 1188.3   | Detected | 2030.7   | Detected   | 1207.2   | Detected   | Psen2         | 0.979711086 | 1.64802792 | 1.01590507 | 1.7089119 |
| A_52_P4683 | 132.9    | Detected | 210.8    | Detected | 240.1    | Detected   | 130.2    | Detected   | Pdxk-ps       | 0.979683973 | 1.80662152 | 0.61764706 | 1.1389943 |
| A_55_P2018 | 314.8    | Detected | 392.4    | Detected | 326.4    | Detected   | 308.4    | Detected   | Zbtbd6        | 0.979669632 | 1.03684879 | 0.78593272 | 0.8318043 |
| A_55_P2117 | 2346.7   | Detected | 2063.7   | Detected | 2277.6   | Detected   | 2298.9   | Detected   | Mtmr3         | 0.979630971 | 0.9705544  | 1.11397005 | 1.1036488 |
| A_51_P4499 | 7125.8   | Detected | 7913.5   | Detected | 6967.5   | Detected   | 6980.6   | Detected   | Ftsj3         | 0.979623341 | 0.97778495 | 0.88211285 | 0.8804574 |
| A_55_P1965 | 578.3    | Detected | 459.3    | Detected | 498.5    | Detected   | 566.5    | Detected   | Commd7        | 0.979595366 | 0.86200934 | 1.23339865 | 1.0853473 |
| A_51_P3649 | 1366.8   | Detected | 896.7    | Detected | 1229.3   | Detected   | 1338.9   | Detected   | Gabpa         | 0.979587357 | 0.89940006 | 1.49314152 | 1.3709156 |
| A_51_P2270 | 63283.7  | Detected | 68770.6  | Detected | 61969.9  | Detected   | 61991.3  | Detected   | Cks1b         | 0.97957768  | 0.97923952 | 0.90142154 | 0.9011104 |
| A_51_P3849 | 84254.6  | Detected | 72009    | Detected | 111688.6 | Detected   | 82527    | Detected   | Ndufa2        | 0.979495482 | 1.32560833 | 1.14606508 | 1.5510367 |
| A_55_P2097 | 179050.9 | Detected | 173307.1 | Detected | 200171.9 | Detected   | 175374.1 | Detected   | Rps11         | 0.979465057 | 1.11796087 | 1.01192681 | 1.1550127 |
| A_55_P2339 | 2025.3   | Detected | 1844     | Detected | 1954.1   | Detected   | 1983.6   | Detected   | Hnrnp1        | 0.979410458 | 0.96484471 | 1.07570499 | 1.0597072 |
| A_55_P2318 | 58.2     | Detected | 28.9     | Detected | 50       | Detected   | 57       | Detected   | BB236558      | 0.979381443 | 0.85910653 | 1.97231834 | 1.7301038 |
| A_55_P2095 | 7209.8   | Detected | 5291.8   | Detected | 6513.7   | Detected   | 7059.6   | Detected   | Pml           | 0.979167245 | 0.90345086 | 1.33406402 | 1.2309044 |
| A_52_P1121 | 1223.6   | Detected | 1268.3   | Detected | 1462.8   | Detected   | 1198.1   | Detected   | Srgap2        | 0.979159856 | 1.19548872 | 0.94465032 | 1.1533549 |
| A_55_P2046 | 330.8    | Detected | 273.3    | Detected | 325.5    | Detected   | 323.9    | Detected   | 9430060I03Rik | 0.979141475 | 0.98397823 | 1.18514453 | 1.1909989 |
| A_55_P2153 | 2497.6   | Detected | 1719.5   | Detected | 3336.5   | Detected   | 2445.3   | Detected   | Ccdc34        | 0.979059898 | 1.33588245 | 1.42209945 | 1.9403896 |
| A_55_P1974 | 19.1     | Detected | 88       | Detected | 17.2     | Not Detect | 18.7     | Not Detect | Dbh           | 0.979057592 | 0.90052356 | 0.2125     | 0.1954545 |
| A_51_P1238 | 1659.7   | Detected | 1524.2   | Detected | 1774.5   | Detected   | 1624.9   | Detected   | Sbno1         | 0.979032355 | 1.06916913 | 1.06606745 | 1.1642173 |
| A_55_P2068 | 19535.1  | Detected | 15323    | Detected | 18893.8  | Detected   | 19125.1  | Detected   | Anapc15       | 0.979012137 | 0.96717191 | 1.24813026 | 1.2330353 |
| A_55_P2122 | 47.5     | Detected | 27.3     | Detected | 27.2     | Detected   | 46.5     | Not Detect | Asb11         | 0.978947368 | 0.57263158 | 1.7032967  | 0.996337  |
| A_52_P6163 | 19       | Detected | 39.1     | Detected | 24.3     | Detected   | 18.6     | Not Detect | Atp10d        | 0.978947368 | 1.27894737 | 0.47570332 | 0.6214834 |
| A_52_P4110 | 2023.6   | Detected | 2023.4   | Detected | 2147     | Detected   | 1980.9   | Detected   | Dlgap5        | 0.978898992 | 1.06098043 | 0.97899575 | 1.0610853 |
| A_51_P3367 | 26600.1  | Detected | 23835.3  | Detected | 27731.8  | Detected   | 26036.6  | Detected   | Tipin         | 0.978815869 | 1.04254495 | 1.09235462 | 1.163476  |
| A_55_P2006 | 245      | Detected | 219      | Detected | 172.3    | Detected   | 239.8    | Detected   | Usp8          | 0.97877551  | 0.70326531 | 1.09497717 | 0.786758  |
| A_55_P2100 | 772.3    | Detected | 587.7    | Detected | 832.2    | Detected   | 755.9    | Detected   | Zfp148        | 0.978764729 | 1.07756053 | 1.28620044 | 1.4160286 |
| A_55_P2003 | 40018.1  | Detected | 33269.8  | Detected | 46182.2  | Detected   | 39167.8  | Detected   | Tspan3        | 0.978752115 | 1.1540328  | 1.17727789 | 1.3881117 |
| A_51_P3488 | 7622.1   | Detected | 4925     | Detected | 5197.8   | Detected   | 7459.9   | Detected   | Amotl2        | 0.978719775 | 0.68193805 | 1.51470051 | 1.0553909 |
| A_66_P1031 | 495.7    | Detected | 375.4    | Detected | 391.6    | Detected   | 485.1    | Detected   | 2210017I01Rik | 0.978616098 | 0.78999395 | 1.29222163 | 1.043154  |
| A_55_P2047 | 9112     | Detected | 5965     | Detected | 9323     | Detected   | 8917.1   | Detected   | Meis2         | 0.978610623 | 1.02315628 | 1.4949036  | 1.5629505 |
| A_51_P1093 | 22000.9  | Detected | 19904.4  | Detected | 21194.7  | Detected   | 21530.1  | Detected   | Copa          | 0.978600875 | 0.96335604 | 1.08167541 | 1.0648249 |
| A_51_P1584 | 4637.7   | Detected | 3560.3   | Detected | 3426.6   | Detected   | 4537.9   | Detected   | Rc3h2         | 0.978480712 | 0.73885762 | 1.2745836  | 0.962447  |
| A_55_P2180 | 171.7    | Detected | 165.6    | Detected | 153.3    | Detected   | 168      | Detected   | Mrgprg        | 0.978450786 | 0.89283634 | 1.01449275 | 0.9257246 |
| A_55_P2130 | 222.7    | Detected | 195.6    | Detected | 163.7    | Detected   | 217.9    | Detected   | LOC101056010  | 0.97844634  | 0.7350696  | 1.11400818 | 0.8369121 |
| A_52_P3830 | 37.1     | Detected | 34.3     | Detected | 34       | Detected   | 36.3     | Not Detect | Cd4           | 0.978436658 | 0.91644205 | 1.05830904 | 0.9912536 |
| A_51_P2598 | 2961.7   | Detected | 2700     | Detected | 2882     | Detected   | 2897.7   | Detected   | Fkrp          | 0.978390789 | 0.97308978 | 1.07322222 | 1.0674074 |
| A_51_P3270 | 4548.2   | Detected | 4639.3   | Detected | 3985.4   | Detected   | 4449.9   | Detected   | Zbtb25        | 0.978387054 | 0.87625874 | 0.95917488 | 0.859052  |
| A_52_P2754 | 6130.3   | Detected | 4859.6   | Detected | 6770.7   | Detected   | 5997.4   | Detected   | Ppp4c         | 0.9783208   | 1.10446471 | 1.2341345  | 1.3932628 |
| A_51_P3659 | 11899.1  | Detected | 12251.4  | Detected | 15692.9  | Detected   | 11641    | Detected   | Narfl         | 0.978309284 | 1.31883084 | 0.95017712 | 1.2809067 |
| A_52_P6791 | 24584.5  | Detected | 22303.9  | Detected | 39986.2  | Detected   | 24050.9  | Detected   | Tjp2          | 0.978295267 | 1.6264801  | 1.07832711 | 1.7927896 |



|            |          |            |          |          |          |          |          |            |               |             |            |            |           |
|------------|----------|------------|----------|----------|----------|----------|----------|------------|---------------|-------------|------------|------------|-----------|
| A_55_P2055 | 192211.1 | Detected   | 200271.4 | Detected | 206788.8 | Detected | 188037.2 | Detected   | Rps7          | 0.978284813 | 1.07584213 | 0.9389119  | 1.0325428 |
| A_55_P1965 | 2440     | Detected   | 2639.6   | Detected | 2010.1   | Detected | 2386.8   | Detected   | Setdb1        | 0.978196721 | 0.82381148 | 0.90422791 | 0.7615169 |
| A_51_P3886 | 23163.7  | Detected   | 20620.7  | Detected | 23845.4  | Detected | 22658.1  | Detected   | Ndufs4        | 0.978172744 | 1.02942967 | 1.09880363 | 1.1563817 |
| A_55_P1965 | 13830.4  | Detected   | 11125.4  | Detected | 21643.8  | Detected | 13527.5  | Detected   | Gnpda1        | 0.97809897  | 1.56494389 | 1.21591134 | 1.9454402 |
| A_66_P1230 | 5942.4   | Detected   | 4270.2   | Detected | 5884.7   | Detected | 5812.2   | Detected   | Gm10845       | 0.978089661 | 0.99029012 | 1.36110721 | 1.3780853 |
| A_51_P4325 | 8419.6   | Detected   | 7428.7   | Detected | 6357     | Detected | 8234.7   | Detected   | Wrnip1        | 0.978039337 | 0.75502399 | 1.10849812 | 0.8557352 |
| A_55_P2067 | 16286.8  | Detected   | 15908.4  | Detected | 18235.7  | Detected | 15927.6  | Detected   | Arf5          | 0.97794533  | 1.11966132 | 1.00120691 | 1.1462938 |
| A_55_P2116 | 3665.9   | Detected   | 3622.4   | Detected | 3232.4   | Detected | 3585     | Detected   | Szrd1         | 0.977931749 | 0.881748   | 0.98967535 | 0.8923366 |
| A_55_P2126 | 1358.2   | Detected   | 1296.6   | Detected | 1255.8   | Detected | 1328.2   | Detected   | Phf2011       | 0.977911942 | 0.9246061  | 1.02437143 | 0.9685331 |
| A_55_P2018 | 424.3    | Detected   | 421.9    | Detected | 505.5    | Detected | 414.9    | Detected   | Mtmr9         | 0.977845864 | 1.19137403 | 0.98340839 | 1.1981512 |
| A_51_P4054 | 4948.3   | Detected   | 4560.2   | Detected | 3772.6   | Detected | 4838.5   | Detected   | Smcr8         | 0.977810561 | 0.76240325 | 1.06102803 | 0.8272883 |
| A_55_P2054 | 13.5     | Not Detect | 77.2     | Detected | 24.6     | Detected | 13.2     | Not Detect | E330014E10Rik | 0.977777778 | 1.82222222 | 0.17098446 | 0.3186528 |
| A_55_P2176 | 1295.1   | Detected   | 1070.9   | Detected | 1333.8   | Detected | 1266.3   | Detected   | Hipk1         | 0.977762335 | 1.02988186 | 1.18246335 | 1.2454944 |
| A_55_P1994 | 4302     | Detected   | 3440.1   | Detected | 3766.7   | Detected | 4206.3   | Detected   | Taf15         | 0.977754533 | 0.8755695  | 1.22272608 | 1.0949391 |
| A_55_P2021 | 118993.3 | Detected   | 105853.2 | Detected | 117499.8 | Detected | 116332.5 | Detected   | Fkbp1a        | 0.977639077 | 0.98744887 | 1.09899842 | 1.110026  |
| A_55_P2278 | 125.2    | Detected   | 82.8     | Detected | 97       | Detected | 122.4    | Detected   | C920008N22Rik | 0.977635783 | 0.77476038 | 1.47826087 | 1.1714976 |
| A_66_P1260 | 6716.7   | Detected   | 7478.6   | Detected | 8015.7   | Detected | 6566.3   | Detected   | Pycl1         | 0.977608052 | 1.19339854 | 0.87801193 | 1.0718183 |
| A_55_P2160 | 58936    | Detected   | 51910.2  | Detected | 66149.2  | Detected | 57610.2  | Detected   | Arf5          | 0.977504412 | 1.12239039 | 1.10980501 | 1.2743006 |
| A_55_P1967 | 354081.4 | Detected   | 345328   | Detected | 348851.7 | Detected | 346110.5 | Detected   | Rpl11         | 0.97748851  | 0.98523023 | 1.00226596 | 1.0102039 |
| A_51_P3519 | 186      | Detected   | 73.1     | Detected | 23.8     | Detected | 181.8    | Detected   | Chd3os        | 0.977419355 | 0.12795699 | 2.4870041  | 0.3255814 |
| A_51_P1002 | 3213.5   | Detected   | 2737.4   | Detected | 2563.9   | Detected | 3140.9   | Detected   | Srf           | 0.977407811 | 0.79785281 | 1.14740264 | 0.9366187 |
| A_55_P2152 | 5596.3   | Detected   | 4569.1   | Detected | 5203.3   | Detected | 5469.3   | Detected   | Zfyve19       | 0.977306435 | 0.92977503 | 1.19701911 | 1.138802  |
| A_51_P4920 | 3678.7   | Detected   | 3638.8   | Detected | 3666.8   | Detected | 3594.6   | Detected   | Pole3         | 0.977138663 | 0.99676516 | 0.98785314 | 1.0076948 |
| A_55_P2010 | 48.1     | Detected   | 48.2     | Detected | 54.4     | Detected | 47       | Not Detect | C1d           | 0.977130977 | 1.13097713 | 0.97510373 | 1.1286307 |
| A_55_P2023 | 43.6     | Detected   | 34.9     | Detected | 51       | Detected | 42.6     | Not Detect | Depdc5        | 0.97706422  | 1.16972477 | 1.22063037 | 1.4613181 |
| A_51_P1643 | 21.8     | Detected   | 21       | Detected | 26.6     | Detected | 21.3     | Not Detect | Txndc2        | 0.97706422  | 1.22018349 | 1.01428571 | 1.2666667 |
| A_55_P1972 | 549.2    | Detected   | 481.9    | Detected | 420.4    | Detected | 536.6    | Detected   | Fam160b2      | 0.977057538 | 0.76547706 | 1.11350903 | 0.8723802 |
| A_55_P2174 | 39.2     | Detected   | 31.7     | Detected | 30.7     | Detected | 38.3     | Not Detect | Dtx3l         | 0.977040816 | 0.78316327 | 1.20820189 | 0.9684543 |
| A_51_P1612 | 34.8     | Detected   | 29.9     | Detected | 39.5     | Detected | 34       | Not Detect | Rfx3          | 0.977011494 | 1.13505747 | 1.13712375 | 1.3210702 |
| A_55_P2111 | 391.2    | Detected   | 362.6    | Detected | 307.7    | Detected | 382.2    | Detected   | Zc3h12c       | 0.976993865 | 0.78655419 | 1.05405405 | 0.8485935 |
| A_55_P1969 | 919.5    | Detected   | 914.8    | Detected | 907.5    | Detected | 898.3    | Detected   | Styx          | 0.976943991 | 0.98694943 | 0.98196327 | 0.9920201 |
| A_51_P2857 | 14656    | Detected   | 13533.9  | Detected | 18113    | Detected | 14317.5  | Detected   | Fem1a         | 0.976903657 | 1.23587609 | 1.05789905 | 1.338343  |
| A_55_P2006 | 17340.9  | Detected   | 15127.8  | Detected | 16562.7  | Detected | 16939.6  | Detected   | Eif4a2        | 0.976858179 | 0.95512344 | 1.11976626 | 1.0948519 |
| A_55_P2154 | 189936.6 | Detected   | 191813.3 | Detected | 213356.4 | Detected | 185538.1 | Detected   | Rps29         | 0.976842273 | 1.12330325 | 0.96728485 | 1.1123129 |
| A_55_P2113 | 11970.4  | Detected   | 9768.1   | Detected | 13897.8  | Detected | 11693    | Detected   | Zc3h3         | 0.976826171 | 1.16101383 | 1.19705982 | 1.4227741 |
| A_55_P2095 | 839.1    | Detected   | 727.8    | Detected | 625.9    | Detected | 819.6    | Detected   | Meaf6         | 0.976760815 | 0.74591825 | 1.12613355 | 0.859989  |
| A_55_P2082 | 790.2    | Detected   | 930.9    | Detected | 572.3    | Detected | 771.8    | Detected   | Mdn1          | 0.976714756 | 0.72424703 | 0.82909013 | 0.6147814 |
| A_55_P1990 | 18834.5  | Detected   | 12089.1  | Detected | 18603.2  | Detected | 18395.6  | Detected   | Dolpp1        | 0.976697019 | 0.98771934 | 1.52166828 | 1.5388408 |
| A_55_P2062 | 5906.3   | Detected   | 6330.2   | Detected | 6452.2   | Detected | 5768.2   | Detected   | Mfap3         | 0.976618187 | 1.09242673 | 0.91121923 | 1.0192727 |
| A_55_P2052 | 123.6    | Detected   | 79.2     | Detected | 144.9    | Detected | 120.7    | Detected   | Lst1          | 0.976537217 | 1.1723301  | 1.5239899  | 1.8295455 |

|            |          |          |          |            |          |          |          |            |               |             |            |            |           |
|------------|----------|----------|----------|------------|----------|----------|----------|------------|---------------|-------------|------------|------------|-----------|
| A_51_P4821 | 42.6     | Detected | 49.9     | Detected   | 61.2     | Detected | 41.6     | Not Detect | Mecom         | 0.976525822 | 1.43661972 | 0.83366733 | 1.2264529 |
| A_55_P2114 | 441.8    | Detected | 409.4    | Detected   | 450.5    | Detected | 431.4    | Detected   | Tbc1d31       | 0.976459937 | 1.01969217 | 1.05373718 | 1.1003908 |
| A_55_P1959 | 20042.5  | Detected | 22091.9  | Detected   | 22356.9  | Detected | 19570.6  | Detected   | Imp4          | 0.976455033 | 1.11547462 | 0.8858722  | 1.0119953 |
| A_55_P2022 | 62024.2  | Detected | 52175.7  | Detected   | 66498.5  | Detected | 60562.8  | Detected   | Psmd2         | 0.976438229 | 1.07213797 | 1.16074724 | 1.2745109 |
| A_55_P2081 | 2241.7   | Detected | 2084.4   | Detected   | 1525.4   | Detected | 2188.8   | Detected   | Glis1         | 0.976401838 | 0.68046572 | 1.05008636 | 0.7318173 |
| A_55_P2090 | 23849.2  | Detected | 29131.8  | Detected   | 24215.6  | Detected | 23285.3  | Detected   | Fam207a       | 0.976355601 | 1.0153632  | 0.79930866 | 0.8312428 |
| A_55_P2065 | 6235.7   | Detected | 5610.7   | Detected   | 5429.3   | Detected | 6088.1   | Detected   | Dhx8          | 0.976329843 | 0.87068012 | 1.08508742 | 0.9676689 |
| A_55_P2125 | 49201.1  | Detected | 37757.1  | Detected   | 47522.2  | Detected | 48031.8  | Detected   | Mmadhc        | 0.976234271 | 0.96587678 | 1.2721263  | 1.2586295 |
| A_55_P2233 | 492.2    | Detected | 405.5    | Detected   | 519.2    | Detected | 480.5    | Detected   | Zfp626        | 0.976229175 | 1.05485575 | 1.18495684 | 1.2803946 |
| A_51_P4845 | 394.9    | Detected | 414.6    | Detected   | 438.8    | Detected | 385.5    | Detected   | Spata25       | 0.976196505 | 1.11116738 | 0.92981187 | 1.0583695 |
| A_55_P2117 | 16.8     | Detected | 21.7     | Detected   | 30.3     | Detected | 16.4     | Not Detect | Pigu          | 0.976190476 | 1.80357143 | 0.75576037 | 1.3963134 |
| A_51_P1907 | 18564.8  | Detected | 18568.6  | Detected   | 16916.8  | Detected | 18122.5  | Detected   | Rtca          | 0.976175343 | 0.91122985 | 0.97597557 | 0.9110434 |
| A_52_P3943 | 4217     | Detected | 3761.8   | Detected   | 5021.9   | Detected | 4116.5   | Detected   | 1600012H06Rik | 0.976167892 | 1.19087029 | 1.09428997 | 1.3349726 |
| A_65_P0302 | 3254.9   | Detected | 2111.4   | Detected   | 2157.2   | Detected | 3176.8   | Detected   | Cdc14b        | 0.976005407 | 0.66275462 | 1.50459411 | 1.0216918 |
| A_52_P4940 | 2012     | Detected | 2110.4   | Detected   | 2054.1   | Detected | 1963.7   | Detected   | Pde12         | 0.975994036 | 1.02092445 | 0.93048711 | 0.9733226 |
| A_55_P2151 | 179996   | Detected | 168849.4 | Detected   | 189716   | Detected | 175657.5 | Detected   | Rpl7a         | 0.975896687 | 1.0540012  | 1.04032055 | 1.1235811 |
| A_52_P2079 | 626      | Detected | 614.4    | Detected   | 534.1    | Detected | 610.9    | Detected   | Gtf3c2        | 0.975878594 | 0.85319489 | 0.99430339 | 0.8693034 |
| A_55_P1968 | 7299     | Detected | 6669.5   | Detected   | 6948.5   | Detected | 7122.7   | Detected   | Gtpbp6        | 0.975846006 | 0.95197972 | 1.06795112 | 1.0418322 |
| A_52_P5721 | 3325.2   | Detected | 3036     | Detected   | 2682.2   | Detected | 3244.7   | Detected   | Pank3         | 0.97579093  | 0.80662817 | 1.06874177 | 0.8834651 |
| A_55_P2114 | 93025    | Detected | 88385.6  | Detected   | 109680   | Detected | 90762.6  | Detected   | LOC100862445  | 0.975679656 | 1.17903789 | 1.02689352 | 1.2409261 |
| A_55_P2052 | 58228.3  | Detected | 55823.6  | Detected   | 79379.7  | Detected | 56807.2  | Detected   | Psat1         | 0.975594342 | 1.36324949 | 1.01761979 | 1.4219739 |
| A_55_P2084 | 338361.5 | Detected | 290339.8 | Detected   | 343532.5 | Detected | 330101   | Detected   | Hist1h2an     | 0.975586761 | 1.01528247 | 1.13694712 | 1.1832084 |
| A_55_P2137 | 323963.8 | Detected | 343202.9 | Detected   | 353569.7 | Detected | 316050.3 | Detected   | Rps24         | 0.975572888 | 1.09138645 | 0.9208847  | 1.030206  |
| A_55_P1956 | 42175.3  | Detected | 42246.6  | Detected   | 45870.4  | Detected | 41143.8  | Detected   | Nolc1         | 0.975542557 | 1.08761289 | 0.97389612 | 1.0857773 |
| A_55_P2168 | 25495.7  | Detected | 29158.7  | Detected   | 24096.9  | Detected | 24871.4  | Detected   | Plrg1         | 0.975513518 | 0.94513585 | 0.8529667  | 0.8264052 |
| A_52_P5856 | 326.7    | Detected | 282.9    | Detected   | 339.6    | Detected | 318.7    | Detected   | Ciao1         | 0.975512703 | 1.03948577 | 1.12654648 | 1.2004242 |
| A_55_P2025 | 36375.5  | Detected | 54937.8  | Detected   | 26778.5  | Detected | 35484.5  | Detected   | Cpe           | 0.975505491 | 0.73616858 | 0.64590319 | 0.4874331 |
| A_52_P8685 | 4697.2   | Detected | 4258.6   | Detected   | 5035.2   | Detected | 4582     | Detected   | Tmem183a      | 0.975474751 | 1.07195776 | 1.07594045 | 1.1823604 |
| A_51_P3410 | 2818.7   | Detected | 3177     | Detected   | 3135.2   | Detected | 2749.5   | Detected   | Erc8          | 0.975449675 | 1.11228581 | 0.86543909 | 0.9868429 |
| A_55_P2082 | 7324.4   | Detected | 7387     | Detected   | 5595.3   | Detected | 7144     | Detected   | Baz1a         | 0.975369996 | 0.76392606 | 0.96710437 | 0.7574523 |
| A_52_P7892 | 863.5    | Detected | 711.9    | Detected   | 1034.8   | Detected | 842.2    | Detected   | Ythdc2        | 0.975332947 | 1.19837869 | 1.18303132 | 1.4535749 |
| A_65_P1782 | 2309.9   | Detected | 2370.2   | Detected   | 2305.9   | Detected | 2252.7   | Detected   | Cenpl         | 0.975237023 | 0.99826832 | 0.95042612 | 0.9728715 |
| A_55_P1997 | 6006.3   | Detected | 6616.7   | Detected   | 6064.7   | Detected | 5857.4   | Detected   | Smek2         | 0.975209364 | 1.00972312 | 0.88524491 | 0.9165747 |
| A_52_P3217 | 60.2     | Detected | 56.3     | Detected   | 73.6     | Detected | 58.7     | Detected   | Narg2         | 0.975083056 | 1.22259136 | 1.04262877 | 1.3072824 |
| A_55_P2049 | 120.1    | Detected | 124.6    | Detected   | 78.6     | Detected | 117.1    | Detected   | Pld2          | 0.975020816 | 0.65445462 | 0.93980738 | 0.6308186 |
| A_51_P2604 | 8358.6   | Detected | 6087.2   | Detected   | 7054.5   | Detected | 8149.8   | Detected   | Ralbp1        | 0.97501974  | 0.84398105 | 1.33884216 | 1.1589072 |
| A_51_P4787 | 20       | Detected | 13.8     | Not Detect | 20.3     | Detected | 19.5     | Not Detect | Tgtp1         | 0.975       | 1.015      | 1.41304348 | 1.4710145 |
| A_55_P2165 | 13600.6  | Detected | 9062.1   | Detected   | 14347.3  | Detected | 13259.3  | Detected   | Klhl22        | 0.974905519 | 1.05490199 | 1.46315975 | 1.5832202 |
| A_55_P2152 | 167.2    | Detected | 137.2    | Detected   | 164.1    | Detected | 163      | Detected   | Lyrml1        | 0.974880383 | 0.98145933 | 1.18804665 | 1.1960641 |
| A_55_P2086 | 63.5     | Detected | 57.5     | Detected   | 55.1     | Detected | 61.9     | Detected   | Olfrc362      | 0.97480315  | 0.86771654 | 1.07652174 | 0.9582609 |

|            |          |            |         |            |          |            |          |            |               |             |            |            |           |
|------------|----------|------------|---------|------------|----------|------------|----------|------------|---------------|-------------|------------|------------|-----------|
| A_55_P2168 | 27106.8  | Detected   | 22499.1 | Detected   | 37947.5  | Detected   | 26422.8  | Detected   | Sac3d1        | 0.974766479 | 1.39992548 | 1.17439364 | 1.686623  |
| A_55_P2164 | 206      | Detected   | 141.9   | Detected   | 148.8    | Detected   | 200.8    | Detected   | Tada2b        | 0.974757282 | 0.7223301  | 1.41508104 | 1.0486258 |
| A_51_P3856 | 7715.3   | Detected   | 7210.9  | Detected   | 8866.1   | Detected   | 7520.4   | Detected   | Mgat3         | 0.974738507 | 1.14915817 | 1.04292113 | 1.2295414 |
| A_51_P1086 | 1095.4   | Detected   | 1117.1  | Detected   | 1181     | Detected   | 1067.7   | Detected   | Pr13b1        | 0.974712434 | 1.07814497 | 0.95577835 | 1.0572017 |
| A_55_P1977 | 197.2    | Detected   | 212.6   | Detected   | 80.5     | Detected   | 192.2    | Detected   | Sall3         | 0.97464503  | 0.40821501 | 0.90404516 | 0.3786453 |
| A_55_P2159 | 49896.1  | Detected   | 43058.9 | Detected   | 39947.7  | Detected   | 48630.4  | Detected   | Sbf1          | 0.974633288 | 0.80061768 | 1.12939253 | 0.9277455 |
| A_55_P2049 | 23.6     | Detected   | 25.7    | Detected   | 25.2     | Detected   | 23       | Not Detect | Prickle4      | 0.974576271 | 1.06779661 | 0.89494163 | 0.9805447 |
| A_65_P1898 | 483.2    | Detected   | 405.1   | Detected   | 494.1    | Detected   | 470.9    | Detected   | Palb2         | 0.974544702 | 1.02255795 | 1.16242903 | 1.2196988 |
| A_55_P2390 | 35.3     | Detected   | 26.7    | Detected   | 34       | Detected   | 34.4     | Not Detect | 1810064F22Rik | 0.974504249 | 0.9631728  | 1.28838951 | 1.2734082 |
| A_52_P6771 | 15339.7  | Detected   | 19376.4 | Detected   | 13702    | Detected   | 14948    | Detected   | Prmt5         | 0.97446495  | 0.89323781 | 0.77145393 | 0.7071489 |
| A_55_P2033 | 16048    | Detected   | 17165.5 | Detected   | 12923.7  | Detected   | 15637.1  | Detected   | Pomgnt1       | 0.974395563 | 0.8053153  | 0.91096094 | 0.7528881 |
| A_55_P2077 | 8191.4   | Detected   | 8217.9  | Detected   | 7833     | Detected   | 7980.8   | Detected   | Mphosph8      | 0.974290109 | 0.9562468  | 0.97114835 | 0.9531632 |
| A_51_P3281 | 3219.4   | Detected   | 2569.9  | Detected   | 4055.5   | Detected   | 3136.5   | Detected   | Gle1          | 0.97424986  | 1.25970678 | 1.2204755  | 1.578077  |
| A_55_P2068 | 23.3     | Detected   | 15.8    | Not Detect | 17.3     | Detected   | 22.7     | Not Detect | Gm3552        | 0.974248927 | 0.74248927 | 1.43670886 | 1.0949367 |
| A_52_P2352 | 1125     | Detected   | 1065.7  | Detected   | 1229.2   | Detected   | 1096     | Detected   | Pms1          | 0.974222222 | 1.09262222 | 1.02843202 | 1.1534203 |
| A_51_P3569 | 23.2     | Detected   | 25.8    | Detected   | 26.5     | Detected   | 22.6     | Not Detect | Lgi3          | 0.974137931 | 1.14224138 | 0.87596899 | 1.0271318 |
| A_55_P2241 | 69.1     | Detected   | 56.6    | Detected   | 65.8     | Detected   | 67.3     | Detected   | 5330439K02Rik | 0.973950796 | 0.95224313 | 1.18904594 | 1.1625442 |
| A_55_P2167 | 49.6     | Detected   | 47.7    | Detected   | 45.1     | Detected   | 48.3     | Not Detect | Gm14151       | 0.973790323 | 0.90927419 | 1.01257862 | 0.9454927 |
| A_51_P1914 | 4136.3   | Detected   | 3901.9  | Detected   | 3497.3   | Detected   | 4027.7   | Detected   | Rnf31         | 0.973744651 | 0.84551411 | 1.0322407  | 0.8963069 |
| A_51_P2536 | 6811.4   | Detected   | 7278.1  | Detected   | 8031.3   | Detected   | 6632.4   | Detected   | Mrps9         | 0.973720527 | 1.17909681 | 0.91128179 | 1.1034885 |
| A_55_P2076 | 2112.5   | Detected   | 2060.6  | Detected   | 1753     | Detected   | 2056.9   | Detected   | Lrr1          | 0.973680473 | 0.82982249 | 0.99820441 | 0.8507231 |
| A_52_P3518 | 18595.2  | Detected   | 21135.5 | Detected   | 15319    | Detected   | 18105.5  | Detected   | Impad1        | 0.973665247 | 0.82381475 | 0.8566393  | 0.7247995 |
| A_55_P1999 | 32060.1  | Detected   | 46980.7 | Detected   | 17868.7  | Detected   | 31211.6  | Detected   | Plin2         | 0.973534081 | 0.5573501  | 0.6643494  | 0.3803413 |
| A_66_P1322 | 79.1     | Detected   | 31.6    | Detected   | 42.4     | Detected   | 77       | Detected   | Tfpi          | 0.973451327 | 0.53603034 | 2.43670886 | 1.3417722 |
| A_55_P1973 | 109184.6 | Detected   | 91765.5 | Detected   | 116565.9 | Detected   | 106275.7 | Detected   | Gm10237       | 0.973357964 | 1.06760386 | 1.15812261 | 1.2702584 |
| A_52_P3397 | 3338.1   | Detected   | 3007.4  | Detected   | 3368.6   | Detected   | 3248.8   | Detected   | Hdgf          | 0.973248255 | 1.00913693 | 1.08026867 | 1.1201037 |
| A_55_P2084 | 63.5     | Detected   | 65.8    | Detected   | 50.8     | Detected   | 61.8     | Detected   | 9130019O22Rik | 0.973228346 | 0.8        | 0.93920973 | 0.7720365 |
| A_55_P2006 | 22708    | Detected   | 21131.3 | Detected   | 25285    | Detected   | 22099.9  | Detected   | Bzw1          | 0.973220891 | 1.11348423 | 1.04583722 | 1.1965662 |
| A_55_P2219 | 4123     | Detected   | 4140.7  | Detected   | 4077     | Detected   | 4012.4   | Detected   | Lmn2          | 0.973174873 | 0.98884308 | 0.9690149  | 0.9846161 |
| A_55_P1985 | 14.9     | Not Detect | 22.4    | Detected   | 9.5      | Not Detect | 14.5     | Not Detect | Krtap5-5      | 0.973154362 | 0.63758389 | 0.64732143 | 0.4241071 |
| A_52_P2655 | 241.7    | Detected   | 188.3   | Detected   | 178.4    | Detected   | 235.2    | Detected   | Exoc6b        | 0.973107158 | 0.73810509 | 1.24907063 | 0.9474243 |
| A_55_P1962 | 3184.8   | Detected   | 3315.8  | Detected   | 1017.7   | Detected   | 3099     | Detected   | Mnda          | 0.973059533 | 0.31954911 | 0.93461608 | 0.3069244 |
| A_66_P1076 | 33.4     | Detected   | 44      | Detected   | 25.8     | Detected   | 32.5     | Not Detect | Fam217b       | 0.973053892 | 0.77245509 | 0.73863636 | 0.5863636 |
| A_52_P1411 | 749.4    | Detected   | 676.6   | Detected   | 740.4    | Detected   | 729.2    | Detected   | Csnk1g3       | 0.973045103 | 0.98799039 | 1.07774165 | 1.094295  |
| A_55_P2042 | 1319.2   | Detected   | 1234.9  | Detected   | 1141     | Detected   | 1283.6   | Detected   | Pbrm1         | 0.973013948 | 0.86491813 | 1.03943639 | 0.9239615 |
| A_55_P1965 | 15515.8  | Detected   | 15254.6 | Detected   | 14014.5  | Detected   | 15096.9  | Detected   | Alg2          | 0.973001714 | 0.90324057 | 0.98966213 | 0.9187065 |
| A_52_P3130 | 32850.9  | Detected   | 37556.4 | Detected   | 29371.3  | Detected   | 31963.5  | Detected   | Hnrrnpab      | 0.972987041 | 0.89407901 | 0.85107998 | 0.7820585 |
| A_66_P1223 | 81.4     | Detected   | 60.6    | Detected   | 42.4     | Detected   | 79.2     | Detected   | Cd84          | 0.972972973 | 0.52088452 | 1.30693069 | 0.69967   |
| A_55_P1994 | 14.8     | Not Detect | 19.7    | Detected   | 7.6      | Not Detect | 14.4     | Not Detect | Heph          | 0.972972973 | 0.51351351 | 0.73096447 | 0.3857868 |
| A_55_P2329 | 680.4    | Detected   | 443.4   | Detected   | 421.3    | Detected   | 662      | Detected   | C530014P21Rik | 0.972957084 | 0.61919459 | 1.49300857 | 0.9501579 |

|            |          |            |         |            |          |            |          |            |               |             |            |            |           |
|------------|----------|------------|---------|------------|----------|------------|----------|------------|---------------|-------------|------------|------------|-----------|
| A_55_P2169 | 8212.4   | Detected   | 8333.9  | Detected   | 6760     | Detected   | 7990.3   | Detected   | Strada        | 0.972955531 | 0.82314549 | 0.9587708  | 0.8111448 |
| A_52_P2905 | 609.8    | Detected   | 516.7   | Detected   | 495.2    | Detected   | 593.3    | Detected   | Tstd2         | 0.972941948 | 0.81206953 | 1.1482485  | 0.9583898 |
| A_55_P2070 | 18327    | Detected   | 22525.5 | Detected   | 17879    | Detected   | 17831.1  | Detected   | Senp3         | 0.972941562 | 0.97555519 | 0.79159619 | 0.7937227 |
| A_55_P2119 | 383.7    | Detected   | 284.5   | Detected   | 277.9    | Detected   | 373.3    | Detected   | Osbpl9        | 0.972895491 | 0.72426375 | 1.31212654 | 0.9768014 |
| A_55_P2137 | 324.5    | Detected   | 206.5   | Detected   | 251.1    | Detected   | 315.7    | Detected   | Dnmbp         | 0.972881356 | 0.77380586 | 1.52881356 | 1.2159806 |
| A_52_P3436 | 239.6    | Detected   | 278.2   | Detected   | 146.4    | Detected   | 233.1    | Detected   | Siah1a        | 0.972871452 | 0.61101836 | 0.83788641 | 0.5262401 |
| A_55_P2001 | 58.9     | Detected   | 34.8    | Detected   | 70.7     | Detected   | 57.3     | Detected   | 6330408A02Rik | 0.972835314 | 1.20033956 | 1.64655172 | 2.0316092 |
| A_55_P1982 | 125.1    | Detected   | 129.9   | Detected   | 98.5     | Detected   | 121.7    | Detected   | Klk9          | 0.972821743 | 0.7873701  | 0.93687452 | 0.7582756 |
| A_55_P2012 | 11       | Not Detect | 22.6    | Detected   | 14.9     | Not Detect | 10.7     | Not Detect | Bmp8b         | 0.972727273 | 1.35454545 | 0.47345133 | 0.659292  |
| A_55_P2171 | 125158.1 | Detected   | 120362  | Detected   | 136900.8 | Detected   | 121744.1 | Detected   | Rps11-ps1     | 0.972722501 | 1.09382293 | 1.01148286 | 1.1374088 |
| A_52_P3254 | 1498.8   | Detected   | 2475.1  | Detected   | 790.7    | Detected   | 1457.9   | Detected   | Arhgap29      | 0.972711503 | 0.52755538 | 0.58902671 | 0.3194618 |
| A_55_P2111 | 2032.5   | Detected   | 1256.7  | Detected   | 1234.7   | Detected   | 1977     | Detected   | Polq          | 0.972693727 | 0.60747847 | 1.57316782 | 0.9824938 |
| A_55_P1954 | 18.3     | Detected   | 10.6    | Not Detect | 7.8      | Not Detect | 17.8     | Not Detect | Plagl2        | 0.972677596 | 0.42622951 | 1.67924528 | 0.7358491 |
| A_52_P5984 | 113      | Detected   | 73.4    | Detected   | 82       | Detected   | 109.9    | Detected   | Klhl22        | 0.972566372 | 0.72566372 | 1.4972752  | 1.1171662 |
| A_55_P2150 | 2567.6   | Detected   | 1568.9  | Detected   | 6229.3   | Detected   | 2497.1   | Detected   | Gm5077        | 0.972542452 | 2.42611778 | 1.59162471 | 3.9704889 |
| A_51_P3723 | 20352    | Detected   | 23646.2 | Detected   | 25314.6  | Detected   | 19792.8  | Detected   | Mrpl54        | 0.972523585 | 1.24383844 | 0.83703936 | 1.0705568 |
| A_51_P1515 | 87.3     | Detected   | 58.3    | Detected   | 57.8     | Detected   | 84.9     | Detected   | Gp1bb         | 0.972508591 | 0.66208477 | 1.45626072 | 0.9914237 |
| A_55_P1987 | 6044     | Detected   | 3580    | Detected   | 5514.3   | Detected   | 5877.7   | Detected   | Erbp2ip       | 0.972485109 | 0.91235936 | 1.64181564 | 1.5403073 |
| A_52_P5430 | 1423     | Detected   | 1398.3  | Detected   | 1365.2   | Detected   | 1383.8   | Detected   | Utp14a        | 0.972452565 | 0.95938159 | 0.98963027 | 0.9763284 |
| A_66_P1194 | 8725.4   | Detected   | 8759.5  | Detected   | 8505.9   | Detected   | 8484.8   | Detected   | Prdx1         | 0.972425333 | 0.97484356 | 0.96863976 | 0.9710486 |
| A_55_P2037 | 144.6    | Detected   | 122.7   | Detected   | 125.5    | Detected   | 140.6    | Detected   | Elmsan1       | 0.972337483 | 0.86791148 | 1.14588427 | 1.0228199 |
| A_52_P5544 | 25.3     | Detected   | 32      | Detected   | 39.3     | Detected   | 24.6     | Not Detect | Rwdd2a        | 0.972332016 | 1.55335968 | 0.76875    | 1.228125  |
| A_55_P2035 | 5200.3   | Detected   | 5623.7  | Detected   | 5229.5   | Detected   | 5056.2   | Detected   | Gm2436        | 0.97229006  | 1.00561506 | 0.89908779 | 0.9299038 |
| A_55_P2002 | 2459.7   | Detected   | 1570    | Detected   | 2699.2   | Detected   | 2391.3   | Detected   | Mlit10        | 0.972191731 | 1.0973696  | 1.52312102 | 1.7192357 |
| A_55_P2266 | 136.5    | Detected   | 118.1   | Detected   | 122.7    | Detected   | 132.7    | Detected   | 9430078K24Rik | 0.972161172 | 0.8989011  | 1.12362405 | 1.03895   |
| A_55_P2066 | 862.1    | Detected   | 608.3   | Detected   | 362.1    | Detected   | 838.1    | Detected   | Crocc         | 0.972161002 | 0.42002088 | 1.37777412 | 0.5952655 |
| A_51_P2954 | 21648.4  | Detected   | 21735.5 | Detected   | 20860.7  | Detected   | 21045.7  | Detected   | Mfsd5         | 0.972159605 | 0.96361394 | 0.9682639  | 0.9597525 |
| A_55_P1991 | 3009.2   | Detected   | 2253.8  | Detected   | 3106.7   | Detected   | 2925.4   | Detected   | E4f1          | 0.972152067 | 1.03240064 | 1.29798562 | 1.3784275 |
| A_51_P2761 | 43       | Detected   | 48.3    | Detected   | 39.4     | Detected   | 41.8     | Not Detect | Olfr1030      | 0.972093023 | 0.91627907 | 0.86542443 | 0.815735  |
| A_55_P2144 | 17.9     | Detected   | 19.9    | Detected   | 21.5     | Detected   | 17.4     | Not Detect | Nnt           | 0.972067039 | 1.20111732 | 0.87437186 | 1.080402  |
| A_51_P4334 | 880      | Detected   | 770.9   | Detected   | 736.5    | Detected   | 855.4    | Detected   | Phc1          | 0.972045455 | 0.83693182 | 1.10961214 | 0.9553768 |
| A_55_P2062 | 2659.1   | Detected   | 1526.1  | Detected   | 1176.2   | Detected   | 2584.5   | Detected   | Gm2382        | 0.971945395 | 0.44233011 | 1.69353253 | 0.7707228 |
| A_55_P2181 | 99.7     | Detected   | 85.8    | Detected   | 45.5     | Detected   | 96.9     | Detected   | LOC100505237  | 0.971915747 | 0.45636911 | 1.12937063 | 0.530303  |
| A_52_P6252 | 1568.7   | Detected   | 1735.4  | Detected   | 1598.2   | Detected   | 1524.6   | Detected   | Ube3a         | 0.97188755  | 1.01880538 | 0.87852945 | 0.9209404 |
| A_55_P2103 | 24.8     | Detected   | 46.6    | Detected   | 25.1     | Detected   | 24.1     | Not Detect | Spata18       | 0.971774194 | 1.01209677 | 0.51716738 | 0.5386266 |
| A_51_P5020 | 34063.2  | Detected   | 30030.1 | Detected   | 35941    | Detected   | 33101.7  | Detected   | Rrm1          | 0.971773057 | 1.05512694 | 1.10228404 | 1.1968325 |
| A_55_P2026 | 759.9    | Detected   | 648.3   | Detected   | 656.1    | Detected   | 738.4    | Detected   | Srrm2         | 0.971706804 | 0.86340308 | 1.13897887 | 1.0120315 |
| A_55_P2186 | 9466.6   | Detected   | 10555.4 | Detected   | 9619.3   | Detected   | 9198.7   | Detected   | Acp1          | 0.971700505 | 1.0161304  | 0.87146863 | 0.9113155 |
| A_51_P4610 | 10.6     | Not Detect | 233.2   | Detected   | 14.6     | Not Detect | 10.3     | Not Detect | Crct1         | 0.971698113 | 1.37735849 | 0.0441681  | 0.0626072 |
| A_55_P2077 | 690.8    | Detected   | 676.2   | Detected   | 605.1    | Detected   | 671.2    | Detected   | Tpgs2         | 0.971627099 | 0.87594094 | 0.99260574 | 0.8948536 |

|            |          |            |          |            |          |            |          |            |               |             |            |            |           |
|------------|----------|------------|----------|------------|----------|------------|----------|------------|---------------|-------------|------------|------------|-----------|
| A_55_P1990 | 12456.8  | Detected   | 11537.8  | Detected   | 13829.8  | Detected   | 12103.3  | Detected   | Tbc1d22a      | 0.971621925 | 1.11022092 | 1.04901281 | 1.1986514 |
| A_52_P3983 | 252.4    | Detected   | 264.9    | Detected   | 230.9    | Detected   | 245.2    | Detected   | Ccdc157       | 0.971473851 | 0.91481775 | 0.92563231 | 0.8716497 |
| A_55_P1972 | 1103.9   | Detected   | 1051.6   | Detected   | 852.3    | Detected   | 1072.4   | Detected   | Capn10        | 0.971464807 | 0.7720808  | 1.01977938 | 0.8104793 |
| A_55_P2010 | 329.4    | Detected   | 244.5    | Detected   | 254.5    | Detected   | 320      | Detected   | Kif17         | 0.971463267 | 0.77261688 | 1.30879346 | 1.0408998 |
| A_55_P2162 | 637.4    | Detected   | 634      | Detected   | 724.8    | Detected   | 619.2    | Detected   | Prpf40b       | 0.971446501 | 1.13711955 | 0.97665615 | 1.1432177 |
| A_51_P2802 | 23778.1  | Detected   | 25070.3  | Detected   | 23795.3  | Detected   | 23098.5  | Detected   | Zfp207        | 0.971419079 | 1.00072335 | 0.92134917 | 0.949143  |
| A_55_P1968 | 839.2    | Detected   | 765.3    | Detected   | 871.1    | Detected   | 815.2    | Detected   | Ptk2b         | 0.971401335 | 1.03801239 | 1.06520319 | 1.1382464 |
| A_55_P2042 | 307.3    | Detected   | 263.5    | Detected   | 241.6    | Detected   | 298.5    | Detected   | Mier1         | 0.971363488 | 0.78620241 | 1.13282732 | 0.916888  |
| A_55_P1983 | 202.3    | Detected   | 215.9    | Detected   | 196.5    | Detected   | 196.5    | Detected   | Cflar         | 0.971329708 | 0.97132971 | 0.91014358 | 0.9101436 |
| A_51_P1515 | 5537.3   | Detected   | 6606.9   | Detected   | 4619.4   | Detected   | 5378.2   | Detected   | Gsg2          | 0.971267585 | 0.83423329 | 0.81402776 | 0.6991781 |
| A_51_P4945 | 5049.6   | Detected   | 4869     | Detected   | 7398     | Detected   | 4904.5   | Detected   | Abhd17b       | 0.971265051 | 1.46506654 | 1.00729102 | 1.5194085 |
| A_55_P2100 | 69492.7  | Detected   | 60249.8  | Detected   | 57513.5  | Detected   | 67489.6  | Detected   | Mtif2         | 0.97117539  | 0.8276193  | 1.12016305 | 0.9545841 |
| A_51_P4920 | 10.4     | Not Detect | 10.6     | Not Detect | 37.7     | Detected   | 10.1     | Not Detect | Fam3b         | 0.971153846 | 3.625      | 0.95283019 | 3.5566038 |
| A_51_P1279 | 9860     | Detected   | 11646.7  | Detected   | 6750.9   | Detected   | 9575.4   | Detected   | Rnasek        | 0.971135903 | 0.68467546 | 0.82215563 | 0.5796406 |
| A_52_P4774 | 12165.9  | Detected   | 8212.2   | Detected   | 9995.1   | Detected   | 11813.4  | Detected   | Mnt           | 0.971025571 | 0.82156684 | 1.4385183  | 1.2171038 |
| A_55_P1956 | 20.7     | Detected   | 25.4     | Detected   | 62.4     | Detected   | 20.1     | Not Detect | Serpinf2      | 0.971014493 | 3.01449275 | 0.79133858 | 2.4566929 |
| A_52_P1498 | 3311.3   | Detected   | 2335     | Detected   | 2789.6   | Detected   | 3215.2   | Detected   | Irak1         | 0.970978166 | 0.84244859 | 1.37695931 | 1.1946895 |
| A_55_P2042 | 1583     | Detected   | 1492.1   | Detected   | 1272     | Detected   | 1536.8   | Detected   | Pbrm1         | 0.970814908 | 0.80353759 | 1.02995778 | 0.8524898 |
| A_55_P2129 | 147332.9 | Detected   | 119099.4 | Detected   | 168739.8 | Detected   | 143026.9 | Detected   | Calm2         | 0.97077367  | 1.14529613 | 1.20090361 | 1.4167981 |
| A_55_P2013 | 8599.9   | Detected   | 8240.8   | Detected   | 9039.8   | Detected   | 8348.5   | Detected   | Dhrs13        | 0.970767102 | 1.05115176 | 1.01306912 | 1.0969566 |
| A_65_P0606 | 363959.7 | Detected   | 358932.7 | Detected   | 354096.8 | Detected   | 353318.7 | Detected   | Gm13826       | 0.970763247 | 0.97290112 | 0.98435918 | 0.986527  |
| A_55_P2153 | 14821    | Detected   | 12576.9  | Detected   | 16181.2  | Detected   | 14386.9  | Detected   | LOC101056659  | 0.970710478 | 1.09177518 | 1.14391464 | 1.286581  |
| A_55_P2002 | 648.1    | Detected   | 541.9    | Detected   | 391.8    | Detected   | 629.1    | Detected   | Zswim6        | 0.970683536 | 0.60453634 | 1.1609153  | 0.7230116 |
| A_66_P1173 | 191      | Detected   | 330.9    | Detected   | 157.1    | Detected   | 185.4    | Detected   | LOC101055922  | 0.970680628 | 0.82251309 | 0.56029012 | 0.4747658 |
| A_52_P5990 | 780.7    | Detected   | 789.6    | Detected   | 903.6    | Detected   | 757.8    | Detected   | Atg14         | 0.97066735  | 1.15742283 | 0.95972644 | 1.1443769 |
| A_55_P2368 | 418.3    | Detected   | 326.7    | Detected   | 368      | Detected   | 406      | Detected   | Sp4           | 0.970595267 | 0.87975137 | 1.24273033 | 1.1264157 |
| A_51_P2790 | 20.4     | Detected   | 18       | Detected   | 13.2     | Not Detect | 19.8     | Not Detect | Trem1         | 0.970588235 | 0.64705882 | 1.1        | 0.7333333 |
| A_55_P2043 | 19203.6  | Detected   | 18320.3  | Detected   | 19200.7  | Detected   | 18638    | Detected   | Grhpr         | 0.970547189 | 0.99984899 | 1.01734142 | 1.048056  |
| A_51_P3872 | 23910.1  | Detected   | 26016.3  | Detected   | 22375.5  | Detected   | 23205.6  | Detected   | Ddx1          | 0.970535464 | 0.93581792 | 0.89196388 | 0.860057  |
| A_66_P1252 | 1602.9   | Detected   | 1570.4   | Detected   | 1293.2   | Detected   | 1555.5   | Detected   | Kif2c         | 0.970428598 | 0.8067877  | 0.99051197 | 0.8234845 |
| A_52_P5222 | 21539.3  | Detected   | 18852.7  | Detected   | 11584.9  | Detected   | 20900.3  | Detected   | Pitx1         | 0.970333298 | 0.53784942 | 1.10861044 | 0.6144955 |
| A_55_P2073 | 28419.5  | Detected   | 24542.4  | Detected   | 27567.2  | Detected   | 27576.2  | Detected   | Mrpl27        | 0.970326712 | 0.97001003 | 1.12361464 | 1.1232479 |
| A_55_P2064 | 79595.3  | Detected   | 80656    | Detected   | 77617.3  | Detected   | 77231.6  | Detected   | Pabpn1        | 0.970303523 | 0.97514929 | 0.95754315 | 0.9623252 |
| A_55_P2107 | 20.2     | Detected   | 15       | Not Detect | 16.1     | Not Detect | 19.6     | Not Detect | BC030307      | 0.97029703  | 0.7970297  | 1.30666667 | 1.0733333 |
| A_55_P1991 | 198.4    | Detected   | 266.7    | Detected   | 203.1    | Detected   | 192.5    | Detected   | Phf21b        | 0.970262097 | 1.02368952 | 0.72178478 | 0.7615298 |
| A_55_P2065 | 41326.2  | Detected   | 36928.8  | Detected   | 59217.8  | Detected   | 40094.3  | Detected   | Glud1         | 0.970190823 | 1.43293601 | 1.08571901 | 1.6035669 |
| A_55_P1997 | 79796.5  | Detected   | 70537.6  | Detected   | 88046.9  | Detected   | 77413.8  | Detected   | Rpl35a        | 0.970140294 | 1.10339301 | 1.09748276 | 1.2482265 |
| A_55_P2081 | 36.8     | Detected   | 29.3     | Detected   | 21.5     | Detected   | 35.7     | Not Detect | Fgd1          | 0.970108696 | 0.58423913 | 1.21843003 | 0.7337884 |
| A_51_P1507 | 120.3    | Detected   | 84.9     | Detected   | 84.6     | Detected   | 116.7    | Detected   | Lyst          | 0.970074813 | 0.7032419  | 1.3745583  | 0.9964664 |
| A_55_P2402 | 40.1     | Detected   | 28.5     | Detected   | 24.4     | Detected   | 38.9     | Not Detect | B430203I24Rik | 0.970074813 | 0.6084788  | 1.36491228 | 0.8561404 |

|            |          |          |          |            |          |            |          |            |               |             |            |            |           |
|------------|----------|----------|----------|------------|----------|------------|----------|------------|---------------|-------------|------------|------------|-----------|
| A_52_P6700 | 367.5    | Detected | 313.7    | Detected   | 238.4    | Detected   | 356.5    | Detected   | Zrsr2         | 0.970068027 | 0.64870748 | 1.13643609 | 0.7599617 |
| A_55_P2040 | 80.1     | Detected | 71.6     | Detected   | 75.8     | Detected   | 77.7     | Detected   | Ccdc126       | 0.970037453 | 0.9463171  | 1.08519553 | 1.0586592 |
| A_51_P3389 | 1693.7   | Detected | 1297.2   | Detected   | 1135.9   | Detected   | 1642.9   | Detected   | Qser1         | 0.970006495 | 0.67066186 | 1.26649707 | 0.8756553 |
| A_55_P2100 | 20       | Detected | 13.4     | Not Detect | 23.1     | Detected   | 19.4     | Not Detect | Cngb1         | 0.97        | 1.155      | 1.44776119 | 1.7238806 |
| A_52_P8059 | 13801.4  | Detected | 14290.1  | Detected   | 13326.7  | Detected   | 13387.1  | Detected   | Pole3         | 0.969981306 | 0.96560494 | 0.9368094  | 0.9325827 |
| A_55_P2130 | 416      | Detected | 358.4    | Detected   | 289.7    | Detected   | 403.5    | Detected   | Prdm11        | 0.969951923 | 0.69639423 | 1.12583705 | 0.8083147 |
| A_66_P1015 | 39.9     | Detected | 46.6     | Detected   | 67.4     | Detected   | 38.7     | Not Detect | Lin52         | 0.969924812 | 1.68922306 | 0.8304721  | 1.4463519 |
| A_55_P2363 | 53.2     | Detected | 48.5     | Detected   | 45.1     | Detected   | 51.6     | Detected   | Clasp2        | 0.969924812 | 0.84774436 | 1.06391753 | 0.9298969 |
| A_51_P2518 | 26015.5  | Detected | 25618.6  | Detected   | 24305.2  | Detected   | 25233    | Detected   | Magoh         | 0.969921777 | 0.93425842 | 0.98494844 | 0.9487326 |
| A_55_P2121 | 10361.9  | Detected | 8600.4   | Detected   | 9280.1   | Detected   | 10049.1  | Detected   | Wiz           | 0.969812486 | 0.8955983  | 1.16844565 | 1.0790312 |
| A_52_P5930 | 437      | Detected | 511.9    | Detected   | 433.9    | Detected   | 423.8    | Detected   | Pibf1         | 0.96979405  | 0.99290618 | 0.82789607 | 0.8476265 |
| A_51_P2309 | 7298.9   | Detected | 5398.6   | Detected   | 7401.6   | Detected   | 7077     | Detected   | Cab39         | 0.969598159 | 1.01407061 | 1.31089542 | 1.3710221 |
| A_51_P4824 | 1840.3   | Detected | 1562.2   | Detected   | 2065.4   | Detected   | 1784.3   | Detected   | Lins          | 0.969570179 | 1.12231701 | 1.1421713  | 1.3221098 |
| A_55_P1953 | 6186.2   | Detected | 4672.7   | Detected   | 6974.4   | Detected   | 5997.7   | Detected   | Dpm1          | 0.969528952 | 1.12741263 | 1.28356197 | 1.4925846 |
| A_52_P2065 | 1909     | Detected | 1170.7   | Detected   | 1753.9   | Detected   | 1850.8   | Detected   | Gtf2ird2      | 0.969512834 | 0.91875327 | 1.58093448 | 1.4981635 |
| A_55_P2054 | 340.9    | Detected | 269.4    | Detected   | 300.3    | Detected   | 330.5    | Detected   | Slc31a2       | 0.96949252  | 0.88090349 | 1.2268003  | 1.1146993 |
| A_55_P2457 | 753.7    | Detected | 702.9    | Detected   | 583.6    | Detected   | 730.7    | Detected   | Psme4         | 0.96948388  | 0.77431339 | 1.03955043 | 0.8302746 |
| A_55_P1955 | 308      | Detected | 246.2    | Detected   | 322      | Detected   | 298.6    | Detected   | Zfp595        | 0.969480519 | 1.04545455 | 1.21283509 | 1.3078798 |
| A_51_P2791 | 1271.2   | Detected | 1126.4   | Detected   | 1572.4   | Detected   | 1232.4   | Detected   | Dak           | 0.969477659 | 1.23694147 | 1.09410511 | 1.3959517 |
| A_55_P2005 | 433328.5 | Detected | 410503.1 | Detected   | 412440.8 | Detected   | 420095.8 | Detected   | Rpl10         | 0.969462659 | 0.95179708 | 1.02336815 | 1.0047203 |
| A_55_P1981 | 4489.7   | Detected | 2695.1   | Detected   | 4597.4   | Detected   | 4352.3   | Detected   | Lactb         | 0.969396619 | 1.02398824 | 1.6148937  | 1.7058365 |
| A_52_P4974 | 19.6     | Detected | 14.7     | Not Detect | 12.4     | Not Detect | 19       | Not Detect | Aanat         | 0.969387755 | 0.63265306 | 1.29251701 | 0.8435374 |
| A_55_P2000 | 1289.9   | Detected | 1090.1   | Detected   | 1586.8   | Detected   | 1250.4   | Detected   | Prf1          | 0.969377471 | 1.23017288 | 1.14705073 | 1.4556463 |
| A_51_P2408 | 13935.8  | Detected | 11908.1  | Detected   | 14007.2  | Detected   | 13507.2  | Detected   | Sppl3         | 0.969244679 | 1.00512349 | 1.13428675 | 1.176275  |
| A_52_P2196 | 419.4    | Detected | 294.9    | Detected   | 504      | Detected   | 406.5    | Detected   | Exoc6         | 0.969241774 | 1.20171674 | 1.37843337 | 1.7090539 |
| A_55_P2129 | 6009.9   | Detected | 5092.6   | Detected   | 6500.8   | Detected   | 5825     | Detected   | Mtfmt         | 0.969234097 | 1.08168189 | 1.14381652 | 1.2765189 |
| A_55_P2205 | 81.1     | Detected | 60.6     | Detected   | 76.6     | Detected   | 78.6     | Detected   | 4930442P07Rik | 0.969173859 | 0.94451295 | 1.2970297  | 1.2640264 |
| A_55_P2131 | 21647    | Detected | 18030.7  | Detected   | 21182.3  | Detected   | 20979.4  | Detected   | Smarcc1       | 0.969159699 | 0.97853282 | 1.16353774 | 1.1747908 |
| A_55_P2126 | 188      | Detected | 178.6    | Detected   | 144.8    | Detected   | 182.2    | Detected   | LOC101056541  | 0.969148936 | 0.77021277 | 1.02015677 | 0.8107503 |
| A_52_P4950 | 30810.8  | Detected | 37925.4  | Detected   | 37956.4  | Detected   | 29859.4  | Detected   | 9130401M01Rik | 0.969121217 | 1.23191868 | 0.78731932 | 1.0008174 |
| A_55_P2425 | 1706.5   | Detected | 1109     | Detected   | 1201.9   | Detected   | 1653.8   | Detected   | Fmn1          | 0.969118078 | 0.70430706 | 1.49125338 | 1.0837692 |
| A_55_P2159 | 6982.3   | Detected | 6173.7   | Detected   | 8086.8   | Detected   | 6765.1   | Detected   | Rfc4          | 0.968892772 | 1.1581857  | 1.09579345 | 1.309879  |
| A_55_P2054 | 1084.3   | Detected | 989.4    | Detected   | 819.8    | Detected   | 1050.4   | Detected   | Fbxo44        | 0.96873559  | 0.75606382 | 1.06165353 | 0.828583  |
| A_55_P2006 | 3357.5   | Detected | 2768.4   | Detected   | 2958.3   | Detected   | 3252.3   | Detected   | 2610005L07Rik | 0.968667163 | 0.88110201 | 1.1747941  | 1.0685956 |
| A_55_P2017 | 14889.9  | Detected | 13770.1  | Detected   | 16874    | Detected   | 14423.1  | Detected   | Cbx3          | 0.96864989  | 1.1332514  | 1.04742159 | 1.2254087 |
| A_66_P1245 | 43038.7  | Detected | 45500.1  | Detected   | 26692.7  | Detected   | 41688.9  | Detected   | H13           | 0.968637529 | 0.62020228 | 0.91623755 | 0.5866515 |
| A_52_P4760 | 920.1    | Detected | 797.6    | Detected   | 708.7    | Detected   | 891.2    | Detected   | Clsn          | 0.968590371 | 0.77024236 | 1.11735206 | 0.8885406 |
| A_51_P4433 | 3844.8   | Detected | 3980.5   | Detected   | 3756     | Detected   | 3723.8   | Detected   | Cbll1         | 0.968528922 | 0.97690387 | 0.93551061 | 0.9436001 |
| A_55_P2059 | 4280     | Detected | 5420.4   | Detected   | 5025.8   | Detected   | 4145.1   | Detected   | Chsy1         | 0.968481308 | 1.17425234 | 0.76472216 | 0.9272009 |
| A_55_P2108 | 3245.3   | Detected | 2866.6   | Detected   | 3159.8   | Detected   | 3142.9   | Detected   | Ubfd1         | 0.968446677 | 0.97365421 | 1.09638596 | 1.1022814 |

|            |          |          |          |            |          |            |          |            |               |             |            |            |           |
|------------|----------|----------|----------|------------|----------|------------|----------|------------|---------------|-------------|------------|------------|-----------|
| A_52_P2306 | 266.2    | Detected | 303.2    | Detected   | 221.5    | Detected   | 257.8    | Detected   | Rep15         | 0.968444778 | 0.83208114 | 0.85026385 | 0.7305409 |
| A_55_P2112 | 71191.9  | Detected | 61865.8  | Detected   | 80327.7  | Detected   | 68943.9  | Detected   | Impdh2        | 0.968423374 | 1.1283264  | 1.11441055 | 1.2984185 |
| A_52_P4321 | 2245.7   | Detected | 1780     | Detected   | 2338.2   | Detected   | 2174.7   | Detected   | Yipf6         | 0.968384023 | 1.04118983 | 1.22174157 | 1.3135955 |
| A_55_P2108 | 338117.4 | Detected | 331079.2 | Detected   | 344733.2 | Detected   | 327426.2 | Detected   | Tuba1c        | 0.968380213 | 1.01956658 | 0.98896639 | 1.0412409 |
| A_52_P4811 | 224.5    | Detected | 153      | Detected   | 193.4    | Detected   | 217.4    | Detected   | Stard5        | 0.968374165 | 0.86146993 | 1.42091503 | 1.2640523 |
| A_52_P5586 | 1778.6   | Detected | 1986.1   | Detected   | 1447.1   | Detected   | 1722.3   | Detected   | Smek1         | 0.96834589  | 0.81361745 | 0.86717688 | 0.7286139 |
| A_55_P2125 | 5917.1   | Detected | 4908.9   | Detected   | 5502.2   | Detected   | 5729.6   | Detected   | Cog1          | 0.96831218  | 0.92988119 | 1.16718613 | 1.1208621 |
| A_51_P1368 | 5242     | Detected | 4745.2   | Detected   | 5303.5   | Detected   | 5075.7   | Detected   | Usp19         | 0.968275467 | 1.01173216 | 1.06964933 | 1.1176557 |
| A_55_P2104 | 25332.6  | Detected | 21069.2  | Detected   | 24597.5  | Detected   | 24528.7  | Detected   | Mrpl27        | 0.968266187 | 0.97098205 | 1.16419703 | 1.1674625 |
| A_51_P4542 | 4564.4   | Detected | 3875.2   | Detected   | 3986.5   | Detected   | 4419.4   | Detected   | NfkB2         | 0.968232407 | 0.87338971 | 1.14043146 | 1.0287211 |
| A_66_P1271 | 629.5    | Detected | 613      | Detected   | 891.7    | Detected   | 609.5    | Detected   | Trmt112       | 0.968228753 | 1.41652105 | 0.99429038 | 1.4546493 |
| A_55_P1967 | 29808.7  | Detected | 25444    | Detected   | 29739.8  | Detected   | 28859.6  | Detected   | Polr2i        | 0.968160302 | 0.99768859 | 1.1342399  | 1.1688335 |
| A_55_P2448 | 219.8    | Detected | 233.2    | Detected   | 141.4    | Detected   | 212.8    | Detected   | Mdn1          | 0.968152866 | 0.6433121  | 0.91252144 | 0.6063465 |
| A_51_P3840 | 43280.6  | Detected | 42399.3  | Detected   | 46384.8  | Detected   | 41900.4  | Detected   | Rad21         | 0.968110424 | 1.07172267 | 0.9882333  | 1.0939992 |
| A_55_P2213 | 646.3    | Detected | 699.7    | Detected   | 620.9    | Detected   | 625.6    | Detected   | 4933412E12Rik | 0.96797153  | 0.96069937 | 0.89409747 | 0.8873803 |
| A_55_P1973 | 129276.3 | Detected | 122099.5 | Detected   | 120029.4 | Detected   | 125132.4 | Detected   | Gm6756        | 0.967945401 | 0.92847181 | 1.02483958 | 0.9830458 |
| A_51_P2554 | 12598.6  | Detected | 24062.3  | Detected   | 20189.2  | Detected   | 12193.6  | Detected   | Cyp1b1        | 0.967853571 | 1.60249552 | 0.50675122 | 0.8390387 |
| A_55_P2060 | 3688.3   | Detected | 2512.5   | Detected   | 3046     | Detected   | 3569.6   | Detected   | Zfp553        | 0.967817152 | 0.82585473 | 1.42073632 | 1.2123383 |
| A_51_P4970 | 21952.3  | Detected | 17806.9  | Detected   | 20137.4  | Detected   | 21243.6  | Detected   | Ppp2r2d       | 0.967716367 | 0.91732529 | 1.19299822 | 1.1308762 |
| A_55_P2159 | 68.1     | Detected | 42.5     | Detected   | 55.3     | Detected   | 65.9     | Detected   | Tead1         | 0.967694567 | 0.81204112 | 1.55058824 | 1.3011765 |
| A_55_P1985 | 708.6    | Detected | 793.4    | Detected   | 740.9    | Detected   | 685.7    | Detected   | Pogz          | 0.967682755 | 1.04558284 | 0.8642551  | 0.9338291 |
| A_55_P2073 | 36792.6  | Detected | 33776.8  | Detected   | 38687.7  | Detected   | 35603.3  | Detected   | Gtf2i         | 0.967675565 | 1.05150764 | 1.05407558 | 1.1453927 |
| A_51_P1934 | 2432.3   | Detected | 2012.1   | Detected   | 2676.2   | Detected   | 2353.6   | Detected   | Prpf40a       | 0.967643794 | 1.10027546 | 1.16972317 | 1.3300532 |
| A_55_P1975 | 2158.7   | Detected | 1460.6   | Detected   | 1781     | Detected   | 2088.7   | Detected   | Zfp217        | 0.967573076 | 0.82503359 | 1.43002876 | 1.2193619 |
| A_51_P3354 | 2741.4   | Detected | 2877.9   | Detected   | 3184.6   | Detected   | 2652.5   | Detected   | Csl           | 0.967571314 | 1.16166922 | 0.921679   | 1.1065708 |
| A_55_P2121 | 4153     | Detected | 4319.8   | Detected   | 4483     | Detected   | 4018.1   | Detected   | Cul2          | 0.967517457 | 1.07946063 | 0.9301588  | 1.0377795 |
| A_55_P1997 | 1286.5   | Detected | 1233.7   | Detected   | 1187.3   | Detected   | 1244.7   | Detected   | Rab2b         | 0.967508745 | 0.92289157 | 1.00891627 | 0.9623896 |
| A_55_P2134 | 3699.5   | Detected | 4280.9   | Detected   | 4313.5   | Detected   | 3578.7   | Detected   | Cinp          | 0.967346939 | 1.16596837 | 0.83596907 | 1.0076152 |
| A_55_P2105 | 26154.2  | Detected | 29904.7  | Detected   | 27275.3  | Detected   | 25299.1  | Detected   | Trim59        | 0.967305442 | 1.04286501 | 0.84599076 | 0.912074  |
| A_55_P2201 | 1100.2   | Detected | 1030.3   | Detected   | 1157.7   | Detected   | 1064.2   | Detected   | Gm15760       | 0.967278677 | 1.05226322 | 1.03290304 | 1.1236533 |
| A_55_P2176 | 299      | Detected | 201.4    | Detected   | 310.1    | Detected   | 289.2    | Detected   | Ralgapa2      | 0.96722408  | 1.03712375 | 1.43594836 | 1.5397219 |
| A_55_P1977 | 195.2    | Detected | 179.8    | Detected   | 217.2    | Detected   | 188.8    | Detected   | Elk4          | 0.967213115 | 1.11270492 | 1.05005562 | 1.2080089 |
| A_52_P5853 | 413.8    | Detected | 369.4    | Detected   | 382.9    | Detected   | 400.2    | Detected   | Cnot11        | 0.967133881 | 0.92532624 | 1.08337845 | 1.0365457 |
| A_55_P2056 | 27.3     | Detected | 29.8     | Detected   | 29.6     | Detected   | 26.4     | Not Detect | Cmtm2a        | 0.967032967 | 1.08424908 | 0.88590604 | 0.9932886 |
| A_55_P2037 | 21.2     | Detected | 12.6     | Not Detect | 11.4     | Not Detect | 20.5     | Not Detect | Gm1968        | 0.966981132 | 0.53773585 | 1.62698413 | 0.9047619 |
| A_51_P1035 | 5751.7   | Detected | 5136.4   | Detected   | 7555.2   | Detected   | 5561.6   | Detected   | Cyb561d2      | 0.966948902 | 1.31355947 | 1.08278171 | 1.4709135 |
| A_55_P1994 | 206018.8 | Detected | 198046.8 | Detected   | 239333.3 | Detected   | 199204.9 | Detected   | Eef1d         | 0.966925834 | 1.16170612 | 1.00584761 | 1.2084684 |
| A_55_P2053 | 9198.9   | Detected | 7486.1   | Detected   | 10507.1  | Detected   | 8894.3   | Detected   | Zc3h3         | 0.966887345 | 1.14221266 | 1.18810863 | 1.4035479 |
| A_52_P4204 | 104781.9 | Detected | 89182.5  | Detected   | 111147.8 | Detected   | 101310.6 | Detected   | Hist1h2ab     | 0.966871187 | 1.06075381 | 1.13599193 | 1.2462961 |
| A_52_P4116 | 1076.2   | Detected | 944.1    | Detected   | 919.6    | Detected   | 1040.5   | Detected   | Ep300         | 0.966827727 | 0.85448801 | 1.10210783 | 0.9740494 |

|            |          |            |          |          |          |            |          |            |               |             |            |            |           |
|------------|----------|------------|----------|----------|----------|------------|----------|------------|---------------|-------------|------------|------------|-----------|
| A_55_P1981 | 14118.5  | Detected   | 10282.7  | Detected | 13440.4  | Detected   | 13648.8  | Detected   | Donson        | 0.966731593 | 0.95197082 | 1.32735566 | 1.3070886 |
| A_52_P4378 | 1692.2   | Detected   | 1222.9   | Detected | 1696.7   | Detected   | 1635.9   | Detected   | Fam13c        | 0.966729701 | 1.00265926 | 1.33772181 | 1.3874397 |
| A_52_P2273 | 889      | Detected   | 711.2    | Detected | 846.3    | Detected   | 859.4    | Detected   | Kif15         | 0.966704162 | 0.9519685  | 1.2083802  | 1.1899606 |
| A_55_P2109 | 9        | Not Detect | 24.2     | Detected | 4.3      | Not Detect | 8.7      | Not Detect | Sprr2e        | 0.966666667 | 0.47777778 | 0.35950413 | 0.177686  |
| A_55_P2080 | 955.6    | Detected   | 1010.1   | Detected | 484.7    | Detected   | 923.7    | Detected   | Cstf2         | 0.966617832 | 0.50722059 | 0.91446391 | 0.4798535 |
| A_51_P2951 | 14962.5  | Detected   | 18859.7  | Detected | 9465     | Detected   | 14462.9  | Detected   | Nfkbia        | 0.966609858 | 0.63258145 | 0.76686798 | 0.5018638 |
| A_52_P5423 | 9630.1   | Detected   | 10177.2  | Detected | 9938.6   | Detected   | 9308.1   | Detected   | Lmf2          | 0.966563172 | 1.03203497 | 0.91460323 | 0.9765554 |
| A_55_P1956 | 46013.3  | Detected   | 42374.7  | Detected | 38145.8  | Detected   | 44473.8  | Detected   | BC004004      | 0.966542282 | 0.82901683 | 1.04953663 | 0.9002022 |
| A_52_P5376 | 337.1    | Detected   | 292.3    | Detected | 353.9    | Detected   | 325.8    | Detected   | Mettl8        | 0.96647879  | 1.04983684 | 1.11460828 | 1.2107424 |
| A_55_P1996 | 261288   | Detected   | 257617.1 | Detected | 293900.9 | Detected   | 252525.9 | Detected   | Rps11-ps1     | 0.966465739 | 1.12481591 | 0.98023734 | 1.1408439 |
| A_55_P2105 | 3485.1   | Detected   | 3572.4   | Detected | 4340.4   | Detected   | 3368.2   | Detected   | Tfb2m         | 0.966457204 | 1.2454162  | 0.94283955 | 1.2149815 |
| A_52_P2039 | 3398.1   | Detected   | 2803.5   | Detected | 3573.3   | Detected   | 3284.1   | Detected   | Srek1ip1      | 0.966451841 | 1.05155822 | 1.17142857 | 1.2745853 |
| A_52_P3675 | 6711.9   | Detected   | 5946.4   | Detected | 7018.2   | Detected   | 6486.7   | Detected   | Mrps2         | 0.966447653 | 1.04563536 | 1.0908617  | 1.1802435 |
| A_51_P4692 | 696.9    | Detected   | 714.5    | Detected | 870.2    | Detected   | 673.5    | Detected   | Zfp647        | 0.966422729 | 1.24867269 | 0.94261721 | 1.2179146 |
| A_55_P2212 | 20.8     | Detected   | 21.7     | Detected | 15.1     | Not Detect | 20.1     | Not Detect | Cd247         | 0.966346154 | 0.72596154 | 0.92626728 | 0.6958525 |
| A_55_P2186 | 408429.8 | Detected   | 384842.2 | Detected | 409768.9 | Detected   | 394679.6 | Detected   | Rps14         | 0.966333994 | 1.00327865 | 1.02556217 | 1.0647712 |
| A_55_P2065 | 16709.4  | Detected   | 12325.8  | Detected | 16376    | Detected   | 16146.4  | Detected   | Fbxo22        | 0.96630639  | 0.98004716 | 1.30996771 | 1.3285953 |
| A_55_P2016 | 36913.6  | Detected   | 35000.3  | Detected | 39256.9  | Detected   | 35664.3  | Detected   | Glr3          | 0.966156105 | 1.06348067 | 1.01897127 | 1.1216161 |
| A_55_P2333 | 52.9     | Detected   | 47       | Detected | 48.6     | Detected   | 51.1     | Detected   | A230101C19Rik | 0.965973535 | 0.91871456 | 1.08723404 | 1.0340426 |
| A_55_P2125 | 16000.5  | Detected   | 16056.9  | Detected | 12902    | Detected   | 15454.5  | Detected   | Arhgef2       | 0.965876066 | 0.8063498  | 0.96248342 | 0.8035175 |
| A_51_P5101 | 362.2    | Detected   | 343.3    | Detected | 327.4    | Detected   | 349.8    | Detected   | B3gntl1       | 0.965764771 | 0.90392049 | 1.01893388 | 0.9536848 |
| A_51_P1589 | 8141.6   | Detected   | 8556.7   | Detected | 5931.4   | Detected   | 7862.8   | Detected   | Prkaa1        | 0.965756117 | 0.72853002 | 0.91890565 | 0.6931878 |
| A_55_P2161 | 18233.2  | Detected   | 16970.7  | Detected | 16055.8  | Detected   | 17607.7  | Detected   | Pkib          | 0.965694447 | 0.88058048 | 1.03753528 | 0.9460894 |
| A_51_P4360 | 1072.2   | Detected   | 857.1    | Detected | 1139.1   | Detected   | 1035.4   | Detected   | Tmem167       | 0.965678045 | 1.06239508 | 1.20802707 | 1.3290165 |
| A_55_P2180 | 556.3    | Detected   | 364.8    | Detected | 401.3    | Detected   | 537.2    | Detected   | Spryd3        | 0.965666008 | 0.72137336 | 1.47258772 | 1.1000548 |
| A_55_P1968 | 7115.9   | Detected   | 6120.8   | Detected | 8013.1   | Detected   | 6870.9   | Detected   | Pbx3          | 0.965570061 | 1.12608384 | 1.12254934 | 1.3091589 |
| A_55_P2160 | 1158.3   | Detected   | 940.4    | Detected | 1229.7   | Detected   | 1118.4   | Detected   | Anapc15       | 0.965552966 | 1.06164206 | 1.18928116 | 1.307635  |
| A_52_P2397 | 4979.9   | Detected   | 4917     | Detected | 6039.9   | Detected   | 4808.3   | Detected   | Larp4         | 0.965541477 | 1.21285568 | 0.97789302 | 1.228371  |
| A_55_P2143 | 1032.3   | Detected   | 784.4    | Detected | 974.7    | Detected   | 996.7    | Detected   | Tcf7l2        | 0.965513901 | 0.94420227 | 1.27065273 | 1.2426058 |
| A_52_P5717 | 191      | Detected   | 165      | Detected | 120.4    | Detected   | 184.4    | Detected   | Sh2d5         | 0.965445026 | 0.63036649 | 1.11757576 | 0.729697  |
| A_51_P1214 | 15373.5  | Detected   | 15563.4  | Detected | 18592.5  | Detected   | 14842.1  | Detected   | 1110038F14Rik | 0.965434026 | 1.20938628 | 0.95365409 | 1.1946297 |
| A_51_P4815 | 7364.4   | Detected   | 6183.9   | Detected | 6677.3   | Detected   | 7109.8   | Detected   | Ddx42         | 0.965428277 | 0.9066998  | 1.14972752 | 1.0797878 |
| A_55_P2042 | 360717.1 | Detected   | 342039.3 | Detected | 350449.3 | Detected   | 348243   | Detected   | Rpl6          | 0.965418606 | 0.97153503 | 1.01813739 | 1.0245878 |
| A_51_P1465 | 127757.2 | Detected   | 125427.6 | Detected | 159148.9 | Detected   | 123339   | Detected   | Msln          | 0.965417213 | 1.24571374 | 0.98334816 | 1.2688507 |
| A_55_P2030 | 508.6    | Detected   | 406.6    | Detected | 615.3    | Detected   | 491      | Detected   | Ccnyl1        | 0.965395203 | 1.20979158 | 1.20757501 | 1.5132809 |
| A_52_P2112 | 3411     | Detected   | 3283.7   | Detected | 3932.7   | Detected   | 3292.9   | Detected   | Cdca2         | 0.965376722 | 1.15294635 | 1.00280172 | 1.1976429 |
| A_52_P4366 | 222.3    | Detected   | 244      | Detected | 174.4    | Detected   | 214.6    | Detected   | Asah2         | 0.965362123 | 0.78452542 | 0.8795082  | 0.7147541 |
| A_51_P2255 | 20681.4  | Detected   | 17960.6  | Detected | 20504.1  | Detected   | 19965    | Detected   | Gm9079        | 0.965360179 | 0.99142708 | 1.11159984 | 1.1416155 |
| A_51_P3533 | 16544.6  | Detected   | 15121.8  | Detected | 19089    | Detected   | 15970.8  | Detected   | 2410015M20Rik | 0.965317989 | 1.15379036 | 1.05614411 | 1.2623497 |
| A_55_P2180 | 15386.5  | Detected   | 12528.3  | Detected | 10215    | Detected   | 14852    | Detected   | Huwe1         | 0.965261755 | 0.66389367 | 1.18547608 | 0.815354  |



|            |          |            |         |            |         |            |         |            |               |             |            |            |           |
|------------|----------|------------|---------|------------|---------|------------|---------|------------|---------------|-------------|------------|------------|-----------|
| A_55_P2069 | 22785.7  | Detected   | 27963.2 | Detected   | 20843.1 | Detected   | 21993.6 | Detected   | Brix1         | 0.965236969 | 0.91474477 | 0.78651943 | 0.7453761 |
| A_66_P1228 | 507.3    | Detected   | 441.4   | Detected   | 602.9   | Detected   | 489.6   | Detected   | Ado           | 0.965109403 | 1.18844865 | 1.10919801 | 1.3658813 |
| A_51_P2038 | 19984.2  | Detected   | 21455.5 | Detected   | 19178.4 | Detected   | 19286.8 | Detected   | Dynll2        | 0.965102431 | 0.95967815 | 0.89892102 | 0.8938687 |
| A_51_P4341 | 7932.3   | Detected   | 6015.5  | Detected   | 6564.4  | Detected   | 7655.4  | Detected   | Myo19         | 0.965092092 | 0.82755317 | 1.27261242 | 1.0912476 |
| A_51_P4420 | 607.3    | Detected   | 571     | Detected   | 291.5   | Detected   | 586.1   | Detected   | Slc41a3       | 0.965091388 | 0.47999341 | 1.02644483 | 0.5105079 |
| A_52_P5510 | 275      | Detected   | 310.8   | Detected   | 509.7   | Detected   | 265.4   | Detected   | Smim1         | 0.965090909 | 1.85345455 | 0.85392535 | 1.6399614 |
| A_51_P2943 | 320.7    | Detected   | 248.9   | Detected   | 231.2   | Detected   | 309.5   | Detected   | Commd8        | 0.965076395 | 0.72092298 | 1.24347127 | 0.9288871 |
| A_55_P2051 | 82559    | Detected   | 73084.3 | Detected   | 75524.4 | Detected   | 79672.1 | Detected   | Psmc2         | 0.965032228 | 0.91479306 | 1.09013974 | 1.0333875 |
| A_51_P3461 | 18853.5  | Detected   | 19080   | Detected   | 33307.4 | Detected   | 18194.2 | Detected   | Agpat4        | 0.965030366 | 1.7666428  | 0.95357442 | 1.7456709 |
| A_52_P3717 | 1098     | Detected   | 1231.2  | Detected   | 1004.9  | Detected   | 1059.6  | Detected   | Tgs1          | 0.965027322 | 0.91520947 | 0.86062378 | 0.8161956 |
| A_55_P2080 | 54.3     | Detected   | 53.1    | Detected   | 43.5    | Detected   | 52.4    | Detected   | Clnkb         | 0.965009208 | 0.80110497 | 0.98681733 | 0.819209  |
| A_51_P1309 | 8149.9   | Detected   | 6219.4  | Detected   | 6950.4  | Detected   | 7864.6  | Detected   | BC005537      | 0.964993436 | 0.85282028 | 1.26452712 | 1.1175355 |
| A_55_P2009 | 413.8    | Detected   | 515.9   | Detected   | 345.5   | Detected   | 399.3   | Detected   | Pnma2         | 0.964958917 | 0.83494442 | 0.77398721 | 0.6697034 |
| A_66_P1344 | 11.4     | Not Detect | 8.9     | Not Detect | 16.9    | Detected   | 11      | Not Detect | Sntg1         | 0.964912281 | 1.48245614 | 1.23595506 | 1.8988764 |
| A_51_P4472 | 541.4    | Detected   | 549.3   | Detected   | 508.5   | Detected   | 522.4   | Detected   | Alox12b       | 0.9649058   | 0.93923162 | 0.95102858 | 0.9257236 |
| A_51_P3614 | 3463.5   | Detected   | 3028.6  | Detected   | 2836.2  | Detected   | 3341.9  | Detected   | Pou2f1        | 0.964891006 | 0.81888263 | 1.10344714 | 0.9364723 |
| A_52_P3196 | 3095.7   | Detected   | 2415.5  | Detected   | 3555.3  | Detected   | 2987    | Detected   | Gpr107        | 0.964886778 | 1.148464   | 1.23659698 | 1.4718692 |
| A_51_P2291 | 11008.4  | Detected   | 8720.1  | Detected   | 9866.4  | Detected   | 10621.8 | Detected   | Cetn3         | 0.964881363 | 0.89626104 | 1.21808236 | 1.1314549 |
| A_66_P1095 | 3551.3   | Detected   | 2817.4  | Detected   | 3945.6  | Detected   | 3426.5  | Detected   | Gm12271       | 0.964857939 | 1.11102976 | 1.21619223 | 1.4004401 |
| A_55_P2172 | 711      | Detected   | 574.9   | Detected   | 741.1   | Detected   | 686     | Detected   | Zfp57         | 0.964838256 | 1.04233474 | 1.193251   | 1.2890938 |
| A_52_P2771 | 8054.1   | Detected   | 7458.3  | Detected   | 7067.5  | Detected   | 7770.2  | Detected   | Ankrd17       | 0.964750872 | 0.87750338 | 1.04181918 | 0.947602  |
| A_55_P2003 | 8391.5   | Detected   | 8301.9  | Detected   | 7143.2  | Detected   | 8095.4  | Detected   | Bag5          | 0.964714294 | 0.85124233 | 0.97512618 | 0.8604295 |
| A_55_P2375 | 421.9    | Detected   | 312.4   | Detected   | 255.8   | Detected   | 407     | Detected   | AI225934      | 0.964683574 | 0.60630481 | 1.3028169  | 0.818822  |
| A_51_P2493 | 31.1     | Detected   | 19.7    | Detected   | 50.2    | Detected   | 30      | Not Detect | 4930417O22Rik | 0.964630225 | 1.61414791 | 1.52284264 | 2.5482234 |
| A_52_P1584 | 2211.1   | Detected   | 437.1   | Detected   | 2028.5  | Detected   | 2132.6  | Detected   | Tshz2         | 0.964497309 | 0.91741667 | 4.87897506 | 4.6408145 |
| A_51_P2317 | 5030.5   | Detected   | 4652.6  | Detected   | 5864.8  | Detected   | 4851.8  | Detected   | Dnajc4        | 0.964476692 | 1.16584833 | 1.04281477 | 1.2605425 |
| A_51_P1831 | 45       | Detected   | 40.9    | Detected   | 35.8    | Detected   | 43.4    | Not Detect | Olf1r531      | 0.964444444 | 0.79555556 | 1.06112469 | 0.8753056 |
| A_55_P2181 | 1106.7   | Detected   | 808     | Detected   | 1133    | Detected   | 1067.3  | Detected   | Tns3          | 0.964398663 | 1.02376434 | 1.32091584 | 1.4022277 |
| A_55_P2039 | 97225.4  | Detected   | 82938.1 | Detected   | 110005  | Detected   | 93763.5 | Detected   | Rpl7a         | 0.96439305  | 1.13144302 | 1.13052385 | 1.3263506 |
| A_51_P2240 | 791.7    | Detected   | 647     | Detected   | 591.7   | Detected   | 763.5   | Detected   | Cntrob        | 0.964380447 | 0.74737906 | 1.18006182 | 0.9145286 |
| A_55_P2028 | 100377.7 | Detected   | 81686.4 | Detected   | 83500.1 | Detected   | 96798.8 | Detected   | Myh9          | 0.964345666 | 0.83185907 | 1.18500509 | 1.0222032 |
| A_55_P2417 | 39.1     | Detected   | 30.9    | Detected   | 28.3    | Detected   | 37.7    | Not Detect | AI447881      | 0.964194373 | 0.72378517 | 1.22006472 | 0.9158576 |
| A_51_P2300 | 11979.3  | Detected   | 14988.1 | Detected   | 12368.8 | Detected   | 11550.3 | Detected   | Pbk           | 0.964188225 | 1.03251442 | 0.77063137 | 0.8252414 |
| A_55_P2001 | 29858.5  | Detected   | 28394.1 | Detected   | 28793.6 | Detected   | 28789   | Detected   | Prps1         | 0.964181054 | 0.96433511 | 1.01390782 | 1.0140698 |
| A_51_P1842 | 12680.6  | Detected   | 12597.6 | Detected   | 11822.7 | Detected   | 12226.1 | Detected   | Dld           | 0.964157847 | 0.93234547 | 0.97051026 | 0.9384883 |
| A_51_P2229 | 41.8     | Detected   | 50.7    | Detected   | 47.8    | Detected   | 40.3    | Not Detect | Pnmal1        | 0.964114833 | 1.14354067 | 0.79487179 | 0.9428008 |
| A_55_P2092 | 1715.7   | Detected   | 1750.2  | Detected   | 1823.5  | Detected   | 1654.1  | Detected   | Taf11         | 0.964096287 | 1.0628315  | 0.94509199 | 1.0418809 |
| A_55_P1952 | 2818.1   | Detected   | 2111.1  | Detected   | 2893.1  | Detected   | 2716.9  | Detected   | Myl6b         | 0.96408928  | 1.02661368 | 1.28695941 | 1.370423  |
| A_66_P1209 | 16.7     | Detected   | 11.8    | Not Detect | 13.3    | Not Detect | 16.1    | Not Detect | Cd79a         | 0.964071856 | 0.79640719 | 1.36440678 | 1.1271186 |
| A_55_P1960 | 20588.6  | Detected   | 15335.6 | Detected   | 16113.8 | Detected   | 19848   | Detected   | Snta1         | 0.964028637 | 0.78265642 | 1.29424346 | 1.0507447 |

|            |          |            |          |            |          |            |          |            |               |             |            |            |           |
|------------|----------|------------|----------|------------|----------|------------|----------|------------|---------------|-------------|------------|------------|-----------|
| A_51_P2849 | 13555.1  | Detected   | 9804.3   | Detected   | 14852.3  | Detected   | 13067.3  | Detected   | Dolk          | 0.964013545 | 1.0956983  | 1.33281315 | 1.5148761 |
| A_55_P2045 | 26462.2  | Detected   | 18125.7  | Detected   | 25641.3  | Detected   | 25509.5  | Detected   | Gm10845       | 0.963997702 | 0.96897839 | 1.40736634 | 1.4146378 |
| A_55_P2032 | 982.4    | Detected   | 760      | Detected   | 1074.7   | Detected   | 947      | Detected   | Iars2         | 0.963965798 | 1.09395358 | 1.24605263 | 1.4140789 |
| A_66_P1180 | 11.1     | Not Detect | 8.7      | Not Detect | 24       | Detected   | 10.7     | Not Detect | Gm12052       | 0.963963964 | 2.16216216 | 1.22988506 | 2.7586207 |
| A_55_P1957 | 82853.2  | Detected   | 76385.6  | Detected   | 67993.1  | Detected   | 79862.6  | Detected   | Ube2s         | 0.963904834 | 0.82064543 | 1.04551905 | 0.8901298 |
| A_55_P1966 | 9596.3   | Detected   | 12766.8  | Detected   | 9858.8   | Detected   | 9249.8   | Detected   | Gemin4        | 0.963892334 | 1.02735429 | 0.72451985 | 0.7722217 |
| A_51_P2225 | 33131.8  | Detected   | 31423.7  | Detected   | 39644.6  | Detected   | 31933.7  | Detected   | Mesdc2        | 0.963838367 | 1.19657248 | 1.01622979 | 1.2616146 |
| A_55_P2037 | 247500.9 | Detected   | 249535.3 | Detected   | 258525.3 | Detected   | 238542.3 | Detected   | Hk1           | 0.963803768 | 1.04454287 | 0.95594611 | 1.036027  |
| A_55_P2137 | 7848.8   | Detected   | 5483.3   | Detected   | 7066.5   | Detected   | 7564.6   | Detected   | Gm10845       | 0.963790643 | 0.90032871 | 1.3795707  | 1.2887312 |
| A_51_P5033 | 11841.8  | Detected   | 8685     | Detected   | 11974.9  | Detected   | 11413    | Detected   | C1galt1c1     | 0.963789289 | 1.01123985 | 1.31410478 | 1.3788025 |
| A_55_P2152 | 2659.4   | Detected   | 4194     | Detected   | 1877.7   | Detected   | 2563     | Detected   | Cpe           | 0.963751222 | 0.70606152 | 0.61111111 | 0.447711  |
| A_51_P1236 | 521.1    | Detected   | 447.7    | Detected   | 466.2    | Detected   | 502.2    | Detected   | Ppwd1         | 0.96373057  | 0.89464594 | 1.1217333  | 1.0413223 |
| A_55_P2042 | 12876.3  | Detected   | 11409.8  | Detected   | 10851.5  | Detected   | 12409.2  | Detected   | Apoo          | 0.963724051 | 0.84274986 | 1.08759137 | 0.9510684 |
| A_52_P2926 | 192.8    | Detected   | 174.5    | Detected   | 205.9    | Detected   | 185.8    | Detected   | Wdr20rt       | 0.963692946 | 1.06794606 | 1.06475645 | 1.1799427 |
| A_55_P2127 | 643.1    | Detected   | 557      | Detected   | 528.7    | Detected   | 619.7    | Detected   | Map3k7        | 0.963613746 | 0.82211165 | 1.11256732 | 0.9491921 |
| A_51_P4276 | 10981.8  | Detected   | 8417.7   | Detected   | 8815     | Detected   | 10582.2  | Detected   | Cnn2          | 0.963612523 | 0.80269173 | 1.25713675 | 1.0471982 |
| A_51_P1366 | 46.7     | Detected   | 37.3     | Detected   | 15.2     | Not Detect | 45       | Not Detect | Krtap31-1     | 0.96359743  | 0.3254818  | 1.20643432 | 0.4075067 |
| A_55_P2185 | 274.4    | Detected   | 363      | Detected   | 234.5    | Detected   | 264.4    | Detected   | Gmps          | 0.963556851 | 0.85459184 | 0.72837466 | 0.6460055 |
| A_55_P2008 | 9865.1   | Detected   | 9329.4   | Detected   | 11565    | Detected   | 9505.3   | Detected   | Lanc12        | 0.963527993 | 1.17231452 | 1.01885437 | 1.2396296 |
| A_51_P1497 | 65329    | Detected   | 70863.3  | Detected   | 82387.8  | Detected   | 62942.8  | Detected   | Spcs1         | 0.963474108 | 1.2611214  | 0.88822846 | 1.16263   |
| A_66_P1084 | 2506.5   | Detected   | 2014.6   | Detected   | 2778.8   | Detected   | 2414.9   | Detected   | Gm19843       | 0.963455017 | 1.10863754 | 1.19869949 | 1.3793309 |
| A_55_P2099 | 386747.2 | Detected   | 339427.4 | Detected   | 382513.9 | Detected   | 372610.5 | Detected   | Hist1h2ag     | 0.963447182 | 0.98905409 | 1.097762   | 1.1269388 |
| A_55_P2122 | 232.4    | Detected   | 247.9    | Detected   | 226.2    | Detected   | 223.9    | Detected   | Wdyhv1        | 0.963425129 | 0.97332186 | 0.90318677 | 0.9124647 |
| A_55_P2080 | 3145     | Detected   | 2801.8   | Detected   | 2672.5   | Detected   | 3029.6   | Detected   | Cstf2         | 0.963306836 | 0.84976153 | 1.08130488 | 0.9538511 |
| A_52_P4444 | 5744.5   | Detected   | 3514     | Detected   | 5448.1   | Detected   | 5533.6   | Detected   | Dnlz          | 0.963286622 | 0.94840282 | 1.57472965 | 1.5503984 |
| A_55_P2158 | 8900.8   | Detected   | 5658.5   | Detected   | 8753.7   | Detected   | 8573.9   | Detected   | Ntan1         | 0.963272964 | 0.9834734  | 1.51522488 | 1.5470001 |
| A_55_P2041 | 62.5     | Detected   | 50.6     | Detected   | 47.1     | Detected   | 60.2     | Detected   | Doxl2         | 0.9632      | 0.7536     | 1.18972332 | 0.93083   |
| A_55_P2100 | 19       | Detected   | 13.1     | Not Detect | 16.4     | Not Detect | 18.3     | Not Detect | Cass4         | 0.963157895 | 0.86315789 | 1.39694656 | 1.2519084 |
| A_52_P3927 | 1369.7   | Detected   | 1331.9   | Detected   | 1380.8   | Detected   | 1319.2   | Detected   | Qtrtd1        | 0.963130613 | 1.00810396 | 0.99046475 | 1.0367145 |
| A_52_P3112 | 908.4    | Detected   | 708.3    | Detected   | 801.4    | Detected   | 874.9    | Detected   | Als2          | 0.963121973 | 0.88221048 | 1.23521107 | 1.1314415 |
| A_51_P3865 | 2874.8   | Detected   | 3262.2   | Detected   | 3268.3   | Detected   | 2768.6   | Detected   | Wbscr16       | 0.9630583   | 1.13687909 | 0.84869107 | 1.0018699 |
| A_55_P2056 | 56.8     | Detected   | 61.8     | Detected   | 49.9     | Detected   | 54.7     | Detected   | Nek5          | 0.963028169 | 0.87852113 | 0.88511327 | 0.8074434 |
| A_55_P1995 | 3505.3   | Detected   | 3101.3   | Detected   | 3032.7   | Detected   | 3375.7   | Detected   | Mdc1          | 0.963027416 | 0.86517559 | 1.08847902 | 0.9778802 |
| A_55_P2166 | 83752    | Detected   | 96959.1  | Detected   | 94156.8  | Detected   | 80653.3  | Detected   | Gm5481        | 0.963001481 | 1.12423345 | 0.83182806 | 0.9710981 |
| A_55_P2037 | 300      | Detected   | 316.1    | Detected   | 222.7    | Detected   | 288.9    | Detected   | Usp54         | 0.963       | 0.74233333 | 0.91395128 | 0.7045239 |
| A_55_P2248 | 329.2    | Detected   | 261.3    | Detected   | 250.3    | Detected   | 317      | Detected   | 2310043M15Rik | 0.962940462 | 0.76032807 | 1.21316494 | 0.9579028 |
| A_51_P1065 | 21.5     | Detected   | 26.8     | Detected   | 28.7     | Detected   | 20.7     | Not Detect | Celf3         | 0.962790698 | 1.33488372 | 0.77238806 | 1.0708955 |
| A_66_P1368 | 5533.4   | Detected   | 4386.3   | Detected   | 3926.1   | Detected   | 5327.3   | Detected   | Peg13         | 0.962753461 | 0.7095276  | 1.21453161 | 0.8950824 |
| A_51_P2375 | 821.4    | Detected   | 679.3    | Detected   | 704.4    | Detected   | 790.8    | Detected   | Ska2          | 0.96274653  | 0.85756026 | 1.16413956 | 1.0369498 |
| A_51_P1747 | 1207.9   | Detected   | 1254.7   | Detected   | 1116.3   | Detected   | 1162.7   | Detected   | Ccdc43        | 0.962579684 | 0.92416591 | 0.9266757  | 0.8896947 |

|            |          |          |          |            |          |            |          |            |               |             |            |            |           |
|------------|----------|----------|----------|------------|----------|------------|----------|------------|---------------|-------------|------------|------------|-----------|
| A_51_P3809 | 2303.2   | Detected | 2081     | Detected   | 2106.8   | Detected   | 2216.7   | Detected   | Epc1          | 0.962443557 | 0.91472734 | 1.06520903 | 1.0123979 |
| A_52_P1637 | 3247     | Detected | 2927.7   | Detected   | 2975.6   | Detected   | 3125     | Detected   | Atp6v0a2      | 0.962426856 | 0.91641515 | 1.06739078 | 1.016361  |
| A_55_P2132 | 138.3    | Detected | 136.9    | Detected   | 110.7    | Detected   | 133.1    | Detected   | Luzp1         | 0.962400578 | 0.80043384 | 0.97224251 | 0.8086194 |
| A_55_P2048 | 19532.7  | Detected | 21778.5  | Detected   | 18931.3  | Detected   | 18797.9  | Detected   | Cdk1          | 0.962381033 | 0.96921061 | 0.86314025 | 0.8692656 |
| A_51_P1425 | 5171.9   | Detected | 4773     | Detected   | 2376.7   | Detected   | 4976.8   | Detected   | Antxr2        | 0.96227692  | 0.45954098 | 1.04269851 | 0.4979468 |
| A_55_P2154 | 53       | Detected | 170.9    | Detected   | 213.9    | Detected   | 51       | Not Detect | Ptgis         | 0.962264151 | 4.03584906 | 0.29842013 | 1.2516091 |
| A_51_P3459 | 1492.8   | Detected | 1838.9   | Detected   | 1627     | Detected   | 1436.4   | Detected   | Tbrg4         | 0.96221865  | 1.08989818 | 0.78111915 | 0.8847681 |
| A_55_P2010 | 173109.9 | Detected | 166814.5 | Detected   | 171605.8 | Detected   | 166561.7 | Detected   | Rpl11         | 0.962173163 | 0.9913113  | 0.99848454 | 1.0287223 |
| A_51_P2420 | 10372.5  | Detected | 9682.8   | Detected   | 9361.8   | Detected   | 9979.5   | Detected   | Ubr7          | 0.962111352 | 0.90255965 | 1.03064196 | 0.9668484 |
| A_66_P1248 | 825.7    | Detected | 755.8    | Detected   | 545.2    | Detected   | 794.4    | Detected   | Tlr4          | 0.96209277  | 0.66028824 | 1.05107171 | 0.7213549 |
| A_55_P2019 | 128695.7 | Detected | 112104.1 | Detected   | 126190   | Detected   | 123813.6 | Detected   | Rpl36a        | 0.962064778 | 0.98053004 | 1.10445202 | 1.1256502 |
| A_55_P2158 | 15.8     | Detected | 12.9     | Not Detect | 12.8     | Not Detect | 15.2     | Not Detect | Dppa4         | 0.962025316 | 0.81012658 | 1.17829457 | 0.9922481 |
| A_55_P2171 | 5347.7   | Detected | 5276.7   | Detected   | 5037.7   | Detected   | 5144.5   | Detected   | Ptbp1         | 0.962002356 | 0.94203115 | 0.97494646 | 0.9547065 |
| A_52_P4864 | 60.5     | Detected | 99.5     | Detected   | 34.6     | Detected   | 58.2     | Detected   | Zfp827        | 0.961983471 | 0.57190083 | 0.58492462 | 0.3477387 |
| A_52_P3535 | 73.5     | Detected | 72.1     | Detected   | 78.9     | Detected   | 70.7     | Detected   | Fbxw13        | 0.961904762 | 1.07346939 | 0.98058252 | 1.0943135 |
| A_52_P2575 | 3533     | Detected | 3010.6   | Detected   | 4062.6   | Detected   | 3398.4   | Detected   | 0610009O20Rik | 0.961902066 | 1.14990093 | 1.12881153 | 1.349432  |
| A_52_P1189 | 2979.6   | Detected | 2548.6   | Detected   | 3605.7   | Detected   | 2865.9   | Detected   | Pex19         | 0.961840516 | 1.21012888 | 1.12449973 | 1.4147767 |
| A_55_P2143 | 21877.9  | Detected | 21957.5  | Detected   | 19794.1  | Detected   | 21041.5  | Detected   | Gm8096        | 0.96176964  | 0.9047532  | 0.95828305 | 0.9014733 |
| A_55_P2075 | 52.3     | Detected | 38.1     | Detected   | 40       | Detected   | 50.3     | Detected   | 5330426L24Rik | 0.961759082 | 0.76481836 | 1.32020997 | 1.0498688 |
| A_51_P3255 | 148.8    | Detected | 124.8    | Detected   | 118.1    | Detected   | 143.1    | Detected   | Spert         | 0.961693548 | 0.7936828  | 1.14663462 | 0.9463141 |
| A_55_P2098 | 75016    | Detected | 63606.5  | Detected   | 71658.9  | Detected   | 72140.3  | Detected   | Tmed2         | 0.961665511 | 0.95524821 | 1.13416553 | 1.1265971 |
| A_51_P1735 | 75701.4  | Detected | 85642.4  | Detected   | 81617.6  | Detected   | 72795.7  | Detected   | Ahsa1         | 0.961616298 | 1.07815179 | 0.84999603 | 0.9530046 |
| A_55_P2182 | 179.7    | Detected | 173.5    | Detected   | 149.6    | Detected   | 172.8    | Detected   | Chrn4         | 0.961602671 | 0.83249861 | 0.99596542 | 0.8622478 |
| A_55_P1972 | 3069.5   | Detected | 3450.6   | Detected   | 2612.6   | Detected   | 2951.6   | Detected   | Gm4055        | 0.961589835 | 0.8511484  | 0.85538747 | 0.7571437 |
| A_55_P2071 | 247      | Detected | 297.7    | Detected   | 244.8    | Detected   | 237.5    | Detected   | Gm7710        | 0.961538462 | 0.99109312 | 0.797783   | 0.8223043 |
| A_55_P2046 | 940.1    | Detected | 956.7    | Detected   | 852.9    | Detected   | 903.9    | Detected   | Slc25a5       | 0.961493458 | 0.90724391 | 0.94481029 | 0.891502  |
| A_55_P1997 | 173352.9 | Detected | 184598.3 | Detected   | 160346.8 | Detected   | 166676.9 | Detected   | Prpf8         | 0.961488963 | 0.92497328 | 0.90291677 | 0.8686256 |
| A_55_P2031 | 14728.4  | Detected | 9986.7   | Detected   | 15447.4  | Detected   | 14160.8  | Detected   | Trmt2a        | 0.961462209 | 1.04881725 | 1.41796589 | 1.5467972 |
| A_51_P2848 | 5929.2   | Detected | 6340     | Detected   | 5630.8   | Detected   | 5700     | Detected   | Polr1b        | 0.961343858 | 0.94967281 | 0.89905363 | 0.8881388 |
| A_55_P2070 | 2280.6   | Detected | 2002.7   | Detected   | 2348     | Detected   | 2192.3   | Detected   | 1700037C18Rik | 0.961282119 | 1.02955363 | 1.09467219 | 1.1724172 |
| A_51_P2448 | 400.3    | Detected | 371.9    | Detected   | 377.3    | Detected   | 384.8    | Detected   | Atp2a1        | 0.961279041 | 0.94254309 | 1.03468674 | 1.01452   |
| A_51_P2000 | 9770.3   | Detected | 10008    | Detected   | 10021.1  | Detected   | 9391.8   | Detected   | Grina         | 0.961260146 | 1.02566963 | 0.93842926 | 1.001309  |
| A_51_P2983 | 25417.2  | Detected | 19775.5  | Detected   | 21126.5  | Detected   | 24430.7  | Detected   | Dek           | 0.9611877   | 0.83118912 | 1.23540239 | 1.0683169 |
| A_55_P2018 | 15689.1  | Detected | 14135.3  | Detected   | 15493.6  | Detected   | 15079.1  | Detected   | Fbxo7         | 0.961119503 | 0.98753912 | 1.06676901 | 1.0960928 |
| A_52_P1860 | 331.6    | Detected | 1205.2   | Detected   | 467.7    | Detected   | 318.7    | Detected   | Spn           | 0.961097708 | 1.41043426 | 0.26443744 | 0.3880684 |
| A_52_P4829 | 61338    | Detected | 94051.7  | Detected   | 52782.8  | Detected   | 58946.8  | Detected   | Cd164         | 0.96101601  | 0.86052366 | 0.62674891 | 0.5612105 |
| A_51_P3342 | 1652.7   | Detected | 1204.4   | Detected   | 1255.3   | Detected   | 1588.2   | Detected   | Zfp628        | 0.960972953 | 0.75954499 | 1.3186649  | 1.0422617 |
| A_51_P3554 | 55224    | Detected | 49465.5  | Detected   | 40697.1  | Detected   | 53068.5  | Detected   | Nisch         | 0.960968057 | 0.73694589 | 1.07283865 | 0.8227371 |
| A_51_P3768 | 2366.4   | Detected | 2077.8   | Detected   | 2161.9   | Detected   | 2273.9   | Detected   | Det1          | 0.960911089 | 0.91358181 | 1.09437867 | 1.0404755 |
| A_52_P4562 | 63289.7  | Detected | 54191.3  | Detected   | 63585.8  | Detected   | 60808.8  | Detected   | Cct8          | 0.960800889 | 1.00467849 | 1.1221137  | 1.1733581 |

|            |          |          |          |            |          |            |          |            |          |             |            |            |           |
|------------|----------|----------|----------|------------|----------|------------|----------|------------|----------|-------------|------------|------------|-----------|
| A_55_P2022 | 297951.7 | Detected | 293107   | Detected   | 304825.6 | Detected   | 286269.4 | Detected   | Gm10653  | 0.960791296 | 1.02307052 | 0.976672   | 1.0399806 |
| A_55_P2142 | 147.5    | Detected | 134.8    | Detected   | 128      | Detected   | 141.7    | Detected   | Mark4    | 0.960677966 | 0.86779661 | 1.05118694 | 0.9495549 |
| A_55_P2070 | 155      | Detected | 135.7    | Detected   | 133.6    | Detected   | 148.9    | Detected   | Pqbp1    | 0.960645161 | 0.86193548 | 1.0972734  | 0.9845247 |
| A_51_P5023 | 3973.6   | Detected | 3587.5   | Detected   | 3733.3   | Detected   | 3817.2   | Detected   | Tfip11   | 0.960640225 | 0.93952587 | 1.06402787 | 1.0406411 |
| A_55_P2183 | 4405.2   | Detected | 3491.8   | Detected   | 4664.1   | Detected   | 4231.6   | Detected   | E4f1     | 0.960592028 | 1.05877145 | 1.2118678  | 1.3357294 |
| A_51_P3696 | 6012.4   | Detected | 3716.1   | Detected   | 5388.9   | Detected   | 5775.3   | Detected   | Ptov1    | 0.960564833 | 0.89629765 | 1.55412933 | 1.4501494 |
| A_51_P3903 | 3608.1   | Detected | 2403.4   | Detected   | 3226.5   | Detected   | 3465.8   | Detected   | Rcor3    | 0.96056096  | 0.89423796 | 1.44204044 | 1.3424732 |
| A_55_P2219 | 4112.3   | Detected | 3067     | Detected   | 5191     | Detected   | 3949.9   | Detected   | AW061147 | 0.960508718 | 1.26231063 | 1.28787088 | 1.6925334 |
| A_52_P4391 | 3634.2   | Detected | 3553.9   | Detected   | 4192.2   | Detected   | 3490.3   | Detected   | Prkrir   | 0.96040394  | 1.15354136 | 0.98210417 | 1.1796055 |
| A_55_P2094 | 6224.9   | Detected | 6168.4   | Detected   | 5753.8   | Detected   | 5978.4   | Detected   | Rapgef6  | 0.96040097  | 0.92432007 | 0.96919785 | 0.9327865 |
| A_55_P2336 | 4543.3   | Detected | 4356.5   | Detected   | 3938.8   | Detected   | 4362.9   | Detected   | Dph6     | 0.960293179 | 0.86694693 | 1.00146907 | 0.9041203 |
| A_55_P2015 | 93.1     | Detected | 137.2    | Detected   | 109.8    | Detected   | 89.4     | Detected   | Zfp961   | 0.960257787 | 1.17937701 | 0.6516035  | 0.8002915 |
| A_55_P2156 | 49911.8  | Detected | 51271.7  | Detected   | 52805.6  | Detected   | 47927.5  | Detected   | Skp1a    | 0.96024387  | 1.05797827 | 0.93477493 | 1.0299171 |
| A_55_P1983 | 454.6    | Detected | 388.4    | Detected   | 318.9    | Detected   | 436.5    | Detected   | Neur14   | 0.960184778 | 0.70149582 | 1.1238414  | 0.8210608 |
| A_55_P2136 | 44918.4  | Detected | 40647.3  | Detected   | 46215    | Detected   | 43126.9  | Detected   | Uba2     | 0.960116567 | 1.02886568 | 1.06100282 | 1.1369759 |
| A_52_P5082 | 285.4    | Detected | 203.6    | Detected   | 332.5    | Detected   | 274      | Detected   | Rmi2     | 0.960056062 | 1.16503153 | 1.34577603 | 1.6331041 |
| A_55_P2104 | 17.5     | Detected | 28.4     | Detected   | 22.1     | Detected   | 16.8     | Not Detect | Defa23   | 0.96        | 1.26285714 | 0.5915493  | 0.778169  |
| A_55_P2255 | 37.5     | Detected | 24.2     | Detected   | 31.3     | Detected   | 36       | Not Detect | Insl5    | 0.96        | 0.83466667 | 1.48760331 | 1.2933884 |
| A_55_P2120 | 207.4    | Detected | 150.6    | Detected   | 131.8    | Detected   | 199.1    | Detected   | Zmynd11  | 0.959980714 | 0.63548698 | 1.32204515 | 0.875166  |
| A_51_P4847 | 4167.9   | Detected | 2807.9   | Detected   | 3312.6   | Detected   | 4001.1   | Detected   | Fam3a    | 0.959979846 | 0.79478874 | 1.42494391 | 1.1797429 |
| A_52_P9397 | 82.4     | Detected | 40       | Detected   | 77.5     | Detected   | 79.1     | Detected   | Itgb6    | 0.959951456 | 0.94053398 | 1.9775     | 1.9375    |
| A_52_P4403 | 1317.3   | Detected | 1045.8   | Detected   | 1062.6   | Detected   | 1264.5   | Detected   | Exoc3    | 0.959918014 | 0.80664997 | 1.2091222  | 1.0160643 |
| A_55_P2115 | 5288     | Detected | 3523.6   | Detected   | 6076.7   | Detected   | 5075.9   | Detected   | Bckdhh   | 0.959890318 | 1.14914902 | 1.44054376 | 1.7245715 |
| A_55_P2180 | 767.3    | Detected | 547.8    | Detected   | 568.7    | Detected   | 736.5    | Detected   | Wdsub1   | 0.959859247 | 0.74117034 | 1.34446878 | 1.0381526 |
| A_55_P2058 | 124.3    | Detected | 87.7     | Detected   | 167.3    | Detected   | 119.3    | Detected   | Prdx4    | 0.959774739 | 1.34593725 | 1.36031927 | 1.9076397 |
| A_51_P4887 | 7963.4   | Detected | 5250.9   | Detected   | 8164.3   | Detected   | 7642.1   | Detected   | Zfand2b  | 0.959652912 | 1.02522792 | 1.4553886  | 1.5548382 |
| A_55_P2122 | 13455.7  | Detected | 11940    | Detected   | 11091.8  | Detected   | 12912.4  | Detected   | Nfic     | 0.959623059 | 0.8243198  | 1.08144054 | 0.9289615 |
| A_55_P2176 | 719.7    | Detected | 685.1    | Detected   | 695.1    | Detected   | 690.6    | Detected   | Fbxw7    | 0.959566486 | 0.96581909 | 1.00802803 | 1.0145964 |
| A_51_P3702 | 4103.5   | Detected | 3614.8   | Detected   | 4591.5   | Detected   | 3937.4   | Detected   | Capn10   | 0.959522359 | 1.11892287 | 1.08924422 | 1.2701948 |
| A_55_P2151 | 67248.8  | Detected | 78832.3  | Detected   | 78798.2  | Detected   | 64524.2  | Detected   | Gm6570   | 0.959484779 | 1.17174135 | 0.81849952 | 0.9995674 |
| A_66_P1187 | 15062.2  | Detected | 12752    | Detected   | 11207.1  | Detected   | 14451.9  | Detected   | Safb2    | 0.959481351 | 0.74405465 | 1.13330458 | 0.8788504 |
| A_51_P1272 | 29.6     | Detected | 25.6     | Detected   | 26.8     | Detected   | 28.4     | Not Detect | Hsd11b1  | 0.959459459 | 0.90540541 | 1.109375   | 1.046875  |
| A_51_P4876 | 14.8     | Detected | 13.8     | Not Detect | 6.8      | Not Detect | 14.2     | Not Detect | Ifi44    | 0.959459459 | 0.45945946 | 1.02898551 | 0.4927536 |
| A_55_P2152 | 237646.5 | Detected | 240073.3 | Detected   | 251895.3 | Detected   | 228004.1 | Detected   | Rpl19    | 0.959425449 | 1.05995796 | 0.94972702 | 1.0492433 |
| A_66_P1328 | 1144.6   | Detected | 831.5    | Detected   | 1086.7   | Detected   | 1098     | Detected   | Dhfr     | 0.959287087 | 0.94941464 | 1.32050511 | 1.3069152 |
| A_55_P2177 | 7101.3   | Detected | 5826.2   | Detected   | 4568.3   | Detected   | 6811.5   | Detected   | Mafg     | 0.959190571 | 0.64330475 | 1.16911538 | 0.784096  |
| A_52_P1387 | 730      | Detected | 557.2    | Detected   | 690.5    | Detected   | 700.2    | Detected   | Edc3     | 0.959178082 | 0.94589041 | 1.25664034 | 1.2392319 |
| A_51_P3966 | 203.3    | Detected | 182.3    | Detected   | 211.8    | Detected   | 195      | Detected   | Ncstn    | 0.959173635 | 1.04181013 | 1.06966539 | 1.1618212 |
| A_51_P4728 | 9258.2   | Detected | 10608.8  | Detected   | 7242.9   | Detected   | 8879.8   | Detected   | Enkd1    | 0.959128124 | 0.7823227  | 0.83702209 | 0.6827257 |
| A_55_P2066 | 2717.9   | Detected | 2273.5   | Detected   | 2541.3   | Detected   | 2606.8   | Detected   | Akt2     | 0.959122852 | 0.93502336 | 1.14660216 | 1.117792  |

|            |          |          |          |          |          |            |          |            |               |             |            |            |           |
|------------|----------|----------|----------|----------|----------|------------|----------|------------|---------------|-------------|------------|------------|-----------|
| A_55_P2063 | 430.2    | Detected | 343      | Detected | 386.8    | Detected   | 412.6    | Detected   | Csprs         | 0.959088796 | 0.89911669 | 1.20291545 | 1.1276968 |
| A_55_P1987 | 520.5    | Detected | 435.2    | Detected | 644.8    | Detected   | 499.2    | Detected   | Kifc5b        | 0.95907781  | 1.23880884 | 1.14705882 | 1.4816176 |
| A_52_P8227 | 6828.8   | Detected | 4997     | Detected | 5794.3   | Detected   | 6549.2   | Detected   | Lypla1        | 0.959055764 | 0.84850925 | 1.31062638 | 1.1595557 |
| A_55_P1961 | 450.8    | Detected | 529.3    | Detected | 195.9    | Detected   | 432.3    | Detected   | Gm13272       | 0.958961846 | 0.43456078 | 0.81673909 | 0.3701115 |
| A_55_P2078 | 3095.9   | Detected | 3440.3   | Detected | 1730.4   | Detected   | 2968.8   | Detected   | Morc4         | 0.958945702 | 0.55893278 | 0.862948   | 0.5029794 |
| A_55_P1988 | 9274.6   | Detected | 6680.6   | Detected | 7508.5   | Detected   | 8893.8   | Detected   | Aspm          | 0.958941626 | 0.80957669 | 1.33128761 | 1.123926  |
| A_55_P1955 | 718      | Detected | 764.8    | Detected | 894.8    | Detected   | 688.5    | Detected   | Zfp800        | 0.958913649 | 1.24623955 | 0.90023536 | 1.1699791 |
| A_52_P3372 | 4466.9   | Detected | 4471.1   | Detected | 4291.7   | Detected   | 4283.3   | Detected   | Alyref2       | 0.95889767  | 0.96077817 | 0.95799691 | 0.9598756 |
| A_55_P2165 | 3093.8   | Detected | 2789.8   | Detected | 2505     | Detected   | 2966.6   | Detected   | Rnf31         | 0.958885513 | 0.80968388 | 1.06337372 | 0.8979138 |
| A_55_P2167 | 55.9     | Detected | 58.5     | Detected | 51.1     | Detected   | 53.6     | Detected   | A230006K03Rik | 0.958855098 | 0.91413238 | 0.91623932 | 0.8735043 |
| A_55_P1965 | 299965.1 | Detected | 281064.6 | Detected | 300792.7 | Detected   | 287620   | Detected   | Ubb           | 0.958844879 | 1.00275899 | 1.02332346 | 1.0701906 |
| A_55_P2082 | 735.7    | Detected | 406.9    | Detected | 412.2    | Detected   | 705.3    | Detected   | Ankrd12       | 0.958678809 | 0.56028272 | 1.73334972 | 1.0130253 |
| A_55_P2140 | 338.8    | Detected | 269.9    | Detected | 373.5    | Detected   | 324.8    | Detected   | 1700102H20Rik | 0.958677686 | 1.10242031 | 1.20340867 | 1.3838459 |
| A_51_P5005 | 915.8    | Detected | 853.6    | Detected | 1045.1   | Detected   | 877.9    | Detected   | Tmed7         | 0.958615418 | 1.14118803 | 1.02846767 | 1.224344  |
| A_51_P3389 | 7575.7   | Detected | 7210.4   | Detected | 7591.2   | Detected   | 7261.9   | Detected   | Prim2         | 0.958578085 | 1.00204602 | 1.00714246 | 1.0528126 |
| A_52_P6134 | 5014.4   | Detected | 4241.1   | Detected | 4929.6   | Detected   | 4806.5   | Detected   | 4833420G17Rik | 0.958539407 | 0.9830887  | 1.13331447 | 1.16234   |
| A_51_P2854 | 1814     | Detected | 1298.4   | Detected | 1408.4   | Detected   | 1738.5   | Detected   | Rnf113a1      | 0.958379272 | 0.77640573 | 1.33895564 | 1.0847197 |
| A_55_P2069 | 2018.8   | Detected | 1645.9   | Detected | 1539.1   | Detected   | 1934.7   | Detected   | Lrdd          | 0.958341589 | 0.76238359 | 1.17546631 | 0.9351115 |
| A_55_P2097 | 60       | Detected | 54.3     | Detected | 43.9     | Detected   | 57.5     | Detected   | Zdhhc22       | 0.958333333 | 0.73166667 | 1.05893186 | 0.8084715 |
| A_52_P2204 | 1165.8   | Detected | 1295.1   | Detected | 1981.8   | Detected   | 1117.1   | Detected   | Uhrf2         | 0.958226111 | 1.69994853 | 0.86255888 | 1.5302293 |
| A_55_P2080 | 988.3    | Detected | 778.9    | Detected | 1013     | Detected   | 947      | Detected   | Hspa2         | 0.95821107  | 1.02499241 | 1.21581718 | 1.3005521 |
| A_55_P2042 | 166.8    | Detected | 164.7    | Detected | 177.2    | Detected   | 159.8    | Detected   | Mbtd1         | 0.958033573 | 1.06235012 | 0.97024894 | 1.0758956 |
| A_55_P2174 | 1002.8   | Detected | 678.5    | Detected | 587.2    | Detected   | 960.7    | Detected   | Stx17         | 0.958017551 | 0.58556043 | 1.41591746 | 0.8654385 |
| A_55_P2154 | 90.2     | Detected | 25.3     | Detected | 90       | Detected   | 86.4     | Detected   | Mras          | 0.957871397 | 0.99778271 | 3.41501976 | 3.5573123 |
| A_55_P2170 | 78.3     | Detected | 80.1     | Detected | 108      | Detected   | 75       | Detected   | 1700022N22Rik | 0.957854406 | 1.37931034 | 0.93632959 | 1.3483146 |
| A_52_P3303 | 26201.3  | Detected | 28833.3  | Detected | 26412.9  | Detected   | 25094.4  | Detected   | Farp1         | 0.957754005 | 1.00807594 | 0.87032702 | 0.9160554 |
| A_55_P2018 | 14666.9  | Detected | 11025.5  | Detected | 16774.9  | Detected   | 14046.2  | Detected   | Morf4l1       | 0.957680219 | 1.14372499 | 1.27397397 | 1.5214639 |
| A_66_P1358 | 18.9     | Detected | 20.3     | Detected | 15.3     | Not Detect | 18.1     | Not Detect | Olf671        | 0.957671958 | 0.80952381 | 0.89162562 | 0.7536946 |
| A_52_P1946 | 719.4    | Detected | 639.4    | Detected | 574.7    | Detected   | 688.9    | Detected   | Zranb1        | 0.957603559 | 0.79886016 | 1.07741633 | 0.8988114 |
| A_55_P2078 | 18799.9  | Detected | 18005    | Detected | 16298.4  | Detected   | 18002.6  | Detected   | BC004004      | 0.9575902   | 0.86694078 | 0.9998667  | 0.9052152 |
| A_55_P2151 | 377      | Detected | 355.1    | Detected | 217.9    | Detected   | 361      | Detected   | Pwwp2a        | 0.957559682 | 0.57798408 | 1.01661504 | 0.61363   |
| A_55_P1983 | 150121.2 | Detected | 137346.2 | Detected | 145214   | Detected   | 143749.5 | Detected   | Birc5         | 0.957556295 | 0.96731175 | 1.0466216  | 1.0572844 |
| A_55_P1970 | 127.1    | Detected | 155.2    | Detected | 126.1    | Detected   | 121.7    | Detected   | Teddm1        | 0.957513769 | 0.99213218 | 0.78414948 | 0.8125    |
| A_52_P5438 | 4925.6   | Detected | 4730     | Detected | 4573.2   | Detected   | 4716.2   | Detected   | Srsf6         | 0.957487413 | 0.92845542 | 0.99708245 | 0.9668499 |
| A_52_P4868 | 5289.4   | Detected | 4795.7   | Detected | 5645.4   | Detected   | 5064.4   | Detected   | Bzw1          | 0.957462094 | 1.06730442 | 1.05602936 | 1.1771796 |
| A_52_P2516 | 18.8     | Detected | 18.6     | Detected | 20       | Detected   | 18       | Not Detect | Prodh2        | 0.957446809 | 1.06382979 | 0.96774194 | 1.0752688 |
| A_51_P2234 | 2454.4   | Detected | 3471.9   | Detected | 2069.8   | Detected   | 2349.9   | Detected   | Polr3d        | 0.957423403 | 0.84330183 | 0.67683401 | 0.5961577 |
| A_55_P2167 | 840.7    | Detected | 823.3    | Detected | 827.2    | Detected   | 804.9    | Detected   | U2af2         | 0.957416439 | 0.98394195 | 0.97765092 | 1.004737  |
| A_52_P1662 | 218.1    | Detected | 183.8    | Detected | 224.7    | Detected   | 208.8    | Detected   | Irak4         | 0.95735901  | 1.03026135 | 1.13601741 | 1.2225245 |
| A_55_P1993 | 38451.2  | Detected | 35173.3  | Detected | 32729.9  | Detected   | 36810.1  | Detected   | LOC100505064  | 0.957319928 | 0.8512062  | 1.0465353  | 0.9305325 |

|            |                   |                   |                   |                   |               |             |            |            |           |
|------------|-------------------|-------------------|-------------------|-------------------|---------------|-------------|------------|------------|-----------|
| A_55_P2205 | 32.8 Detected     | 34 Detected       | 37.5 Detected     | 31.4 Not Detect   | Hnf1a         | 0.957317073 | 1.14329268 | 0.92352941 | 1.1029412 |
| A_51_P2535 | 2543.5 Detected   | 2587.8 Detected   | 2617.3 Detected   | 2434.9 Detected   | Atf6b         | 0.957302929 | 1.02901514 | 0.94091506 | 1.0113996 |
| A_55_P2042 | 173.3 Detected    | 138.7 Detected    | 177.7 Detected    | 165.9 Detected    | Mbtd1         | 0.957299481 | 1.0253895  | 1.19610671 | 1.2811824 |
| A_55_P1993 | 5533.4 Detected   | 4285.3 Detected   | 5992 Detected     | 5297.1 Detected   | Ndr3          | 0.957295695 | 1.08287852 | 1.23610949 | 1.3982685 |
| A_55_P1986 | 490.3 Detected    | 401.9 Detected    | 506.2 Detected    | 469.3 Detected    | 1700055N04Rik | 0.95716908  | 1.03242913 | 1.16770341 | 1.2595173 |
| A_51_P3788 | 7852.7 Detected   | 8482.5 Detected   | 8562.5 Detected   | 7516.2 Detected   | Actr8         | 0.957148497 | 1.09038929 | 0.88608311 | 1.0094312 |
| A_52_P4795 | 16869.8 Detected  | 14043.4 Detected  | 13287.8 Detected  | 16146.3 Detected  | Npepps        | 0.95711271  | 0.7876679  | 1.14974294 | 0.9461954 |
| A_55_P1984 | 1370.8 Detected   | 1139 Detected     | 1162 Detected     | 1312 Detected     | Depdc5        | 0.95710534  | 0.84768019 | 1.15188762 | 1.0201932 |
| A_51_P3907 | 2766.9 Detected   | 2701.5 Detected   | 2037.6 Detected   | 2648.2 Detected   | Tgfb1         | 0.957100004 | 0.73641982 | 0.98027022 | 0.7542476 |
| A_55_P2141 | 403 Detected      | 363.4 Detected    | 442.3 Detected    | 385.7 Detected    | Tmem69        | 0.95707196  | 1.09751861 | 1.06136489 | 1.2171161 |
| A_55_P2044 | 6776.7 Detected   | 7448.8 Detected   | 6708.1 Detected   | 6485.4 Detected   | Fgfr1op       | 0.957014476 | 0.98987708 | 0.87066373 | 0.9005612 |
| A_52_P2791 | 1284.4 Detected   | 1255.5 Detected   | 1066.2 Detected   | 1228.8 Detected   | Srp54a        | 0.956711305 | 0.83011523 | 0.97873357 | 0.8492234 |
| A_55_P2052 | 99.3 Detected     | 87 Detected       | 89.3 Detected     | 95 Detected       | Ankrd23       | 0.956696878 | 0.89929507 | 1.09195402 | 1.0264368 |
| A_51_P2480 | 6800.3 Detected   | 3078.1 Detected   | 5080.2 Detected   | 6505.8 Detected   | Lamb2         | 0.956693087 | 0.74705528 | 2.11357656 | 1.6504337 |
| A_55_P2017 | 75214.6 Detected  | 93219.2 Detected  | 92359 Detected    | 71957.2 Detected  | Hnrnpa2b1     | 0.956691919 | 1.22793979 | 0.77191394 | 0.9907723 |
| A_52_P8220 | 5238.3 Detected   | 4784.1 Detected   | 4102.9 Detected   | 5011.2 Detected   | Wnk1          | 0.95664624  | 0.78325029 | 1.04746974 | 0.8576117 |
| A_55_P2028 | 21837.3 Detected  | 22140.3 Detected  | 24807 Detected    | 20890.4 Detected  | Gm15466       | 0.956638412 | 1.13599209 | 0.94354638 | 1.1204455 |
| A_55_P2064 | 289491.9 Detected | 266719.8 Detected | 289989.9 Detected | 276923.9 Detected | Tuba1c        | 0.956586005 | 1.00172026 | 1.03825775 | 1.0872455 |
| A_51_P2036 | 11.5 Not Detect   | 17.4 Not Detect   | 24.2 Detected     | 11 Not Detect     | Atp8b5        | 0.956521739 | 2.10434783 | 0.63218391 | 1.3908046 |
| A_55_P1960 | 16.1 Detected     | 176.3 Detected    | 3 Not Detect      | 15.4 Not Detect   | Epb4.1l3      | 0.956521739 | 0.1863354  | 0.08735111 | 0.0170164 |
| A_52_P4885 | 423.1 Detected    | 381.6 Detected    | 255.4 Detected    | 404.7 Detected    | Ap1s2         | 0.956511463 | 0.6036398  | 1.06053459 | 0.6692872 |
| A_55_P2137 | 19622.7 Detected  | 15105.5 Detected  | 22109 Detected    | 18767.8 Detected  | Bax           | 0.956433111 | 1.1267053  | 1.24244811 | 1.4636391 |
| A_55_P2001 | 3006.5 Detected   | 2484 Detected     | 3504.2 Detected   | 2875.5 Detected   | Blvra         | 0.95642774  | 1.16554133 | 1.1576087  | 1.4107085 |
| A_55_P1969 | 24356.8 Detected  | 29029 Detected    | 28800.1 Detected  | 23294.9 Detected  | Pdhd          | 0.956402319 | 1.18242544 | 0.80246994 | 0.9921148 |
| A_55_P2346 | 84.7 Detected     | 69.8 Detected     | 73.3 Detected     | 81 Detected       | C630007K24Rik | 0.956316411 | 0.86540732 | 1.16045845 | 1.0501433 |
| A_52_P8043 | 12489.5 Detected  | 12364.1 Detected  | 11901.6 Detected  | 11943.9 Detected  | Srsf2         | 0.956315305 | 0.95292846 | 0.96601451 | 0.9625933 |
| A_55_P2208 | 1432 Detected     | 951.4 Detected    | 1246.7 Detected   | 1369.4 Detected   | Nbeal1        | 0.956284916 | 0.87060056 | 1.43935253 | 1.3103847 |
| A_55_P2156 | 66930.8 Detected  | 75442.2 Detected  | 55037.5 Compromis | 64001.4 Detected  | Rpl26         | 0.956232407 | 0.82230453 | 0.84835013 | 0.729532  |
| A_55_P1954 | 603 Detected      | 503.7 Detected    | 470 Detected      | 576.6 Detected    | Zfp446        | 0.956218905 | 0.77943615 | 1.14472901 | 0.9330951 |
| A_55_P2104 | 152128.6 Detected | 163920.2 Detected | 165018.4 Detected | 145468.1 Detected | Rpl30         | 0.956217963 | 1.08472963 | 0.88743242 | 1.0066996 |
| A_55_P2419 | 84.5 Detected     | 67.9 Detected     | 87.6 Detected     | 80.8 Detected     | Ptpn4         | 0.956213018 | 1.03668639 | 1.18998527 | 1.2901325 |
| A_55_P1970 | 4297.2 Detected   | 3769.8 Detected   | 3403.2 Detected   | 4108.9 Detected   | Rnf11         | 0.956180769 | 0.79195755 | 1.08995172 | 0.9027535 |
| A_55_P2092 | 312.1 Detected    | 197.3 Detected    | 371.4 Detected    | 298.4 Detected    | BC053393      | 0.956103813 | 1.1900032  | 1.51241764 | 1.8824126 |
| A_55_P1963 | 188.8 Detected    | 181.1 Detected    | 230.3 Detected    | 180.5 Detected    | Lrrc16a       | 0.956038136 | 1.21980932 | 0.99668691 | 1.2716731 |
| A_51_P3318 | 2214.8 Detected   | 2164.4 Detected   | 1510.2 Detected   | 2117.4 Detected   | Rnf145        | 0.956023117 | 0.68186744 | 0.97828498 | 0.6977453 |
| A_55_P1970 | 486.5 Detected    | 478.8 Detected    | 501.6 Detected    | 465.1 Detected    | Eif3j1        | 0.956012333 | 1.03103803 | 0.9713868  | 1.047619  |
| A_55_P2165 | 37759.8 Detected  | 25649.5 Detected  | 34267.1 Detected  | 36096.5 Detected  | Nde1          | 0.955950508 | 0.90750216 | 1.40729839 | 1.3359754 |
| A_55_P2028 | 11659.1 Detected  | 12134.1 Detected  | 13234.1 Detected  | 11145.2 Detected  | Dusp12        | 0.955922841 | 1.13508761 | 0.9185024  | 1.0906536 |
| A_55_P2048 | 2188.1 Detected   | 1760.5 Detected   | 2486 Detected     | 2091.6 Detected   | Ubr3          | 0.955897811 | 1.13614551 | 1.18807157 | 1.4120988 |
| A_52_P2903 | 27.2 Detected     | 25.9 Detected     | 31.6 Detected     | 26 Not Detect     | Gltsr1l       | 0.955882353 | 1.16176471 | 1.003861   | 1.2200772 |

|            |         |            |          |            |          |            |          |            |          |             |            |            |           |
|------------|---------|------------|----------|------------|----------|------------|----------|------------|----------|-------------|------------|------------|-----------|
| A_55_P2178 | 16002.1 | Detected   | 13852.7  | Detected   | 15057.2  | Detected   | 15295.7  | Detected   | Derl2    | 0.955855794 | 0.9409515  | 1.10416742 | 1.0869506 |
| A_51_P1206 | 804.5   | Detected   | 679      | Detected   | 901.3    | Detected   | 768.9    | Detected   | Rabl3    | 0.955748912 | 1.12032318 | 1.13240059 | 1.3273932 |
| A_51_P1064 | 22722   | Detected   | 18577.2  | Detected   | 26764.4  | Detected   | 21715.8  | Detected   | Nsmce4a  | 0.955716926 | 1.17790687 | 1.16894903 | 1.4407123 |
| A_51_P1394 | 2427.8  | Detected   | 1590.9   | Detected   | 1818     | Detected   | 2320.2   | Detected   | Taf1     | 0.95568004  | 0.7488261  | 1.45841976 | 1.1427494 |
| A_51_P3107 | 24.8    | Detected   | 14.9     | Not Detect | 16.9     | Detected   | 23.7     | Not Detect | Olfir791 | 0.955645161 | 0.68145161 | 1.59060403 | 1.1342282 |
| A_52_P8598 | 22936   | Detected   | 22376.2  | Detected   | 22252.8  | Detected   | 21917.8  | Detected   | Mrpl45   | 0.955606906 | 0.97021277 | 0.97951395 | 0.9944852 |
| A_55_P2146 | 351     | Detected   | 291.7    | Detected   | 344      | Detected   | 335.4    | Detected   | Map2k5   | 0.955555556 | 0.98005698 | 1.14981145 | 1.1792938 |
| A_51_P1855 | 2814.6  | Detected   | 2141     | Detected   | 2250.3   | Detected   | 2689.5   | Detected   | Mapre1   | 0.955553187 | 0.7995097  | 1.2561887  | 1.0510509 |
| A_55_P2002 | 21802   | Detected   | 17076.8  | Detected   | 19007.5  | Detected   | 20831.6  | Detected   | Aifm1    | 0.955490322 | 0.87182369 | 1.21987726 | 1.1130598 |
| A_55_P2009 | 18343.9 | Detected   | 14499    | Detected   | 15735.4  | Detected   | 17527.2  | Detected   | Zmiz1    | 0.955478388 | 0.85780014 | 1.20885578 | 1.0852748 |
| A_51_P1304 | 129670  | Detected   | 124827.9 | Detected   | 127573.9 | Detected   | 123868.6 | Detected   | Psmd3    | 0.955260276 | 0.98383512 | 0.99231502 | 1.0219983 |
| A_55_P2061 | 50342   | Detected   | 43592.1  | Detected   | 38473    | Detected   | 48089    | Detected   | Chd3     | 0.955246117 | 0.76423265 | 1.1031586  | 0.8825682 |
| A_55_P2176 | 75.8    | Detected   | 56       | Detected   | 73.5     | Detected   | 72.4     | Detected   | Epha10   | 0.955145119 | 0.96965699 | 1.29285714 | 1.3125    |
| A_52_P5958 | 131.5   | Detected   | 94.7     | Detected   | 102.3    | Detected   | 125.6    | Detected   | Cpeb4    | 0.95513308  | 0.77794677 | 1.32629356 | 1.0802534 |
| A_55_P2059 | 15618.4 | Detected   | 16972.2  | Detected   | 14681.9  | Detected   | 14917.6  | Detected   | Ormdl3   | 0.955129847 | 0.94003867 | 0.87894321 | 0.8650558 |
| A_55_P2110 | 619.4   | Detected   | 967.1    | Detected   | 354.3    | Detected   | 591.6    | Detected   | Arhgap29 | 0.955117856 | 0.57200517 | 0.61172578 | 0.366353  |
| A_52_P4207 | 1186.9  | Detected   | 1031.6   | Detected   | 1023.1   | Detected   | 1133.6   | Detected   | Pja2     | 0.9550931   | 0.86199343 | 1.09887553 | 0.9917604 |
| A_55_P2091 | 8.9     | Not Detect | 3        | Not Detect | 57.1     | Detected   | 8.5      | Not Detect | Bnpl     | 0.95505618  | 6.41573034 | 2.83333333 | 19.033333 |
| A_51_P3466 | 20      | Detected   | 57.1     | Detected   | 9.7      | Not Detect | 19.1     | Not Detect | Irf5     | 0.955       | 0.485      | 0.33450088 | 0.1698774 |
| A_55_P1983 | 12912.4 | Detected   | 12280.4  | Detected   | 12800.3  | Detected   | 12330.3  | Detected   | Birc5    | 0.954919302 | 0.99131842 | 1.00406339 | 1.0423358 |
| A_51_P3395 | 50555.2 | Detected   | 54908.2  | Detected   | 48124.3  | Detected   | 48272.9  | Detected   | Cct4     | 0.954855287 | 0.95191593 | 0.87915648 | 0.8764501 |
| A_51_P1024 | 2295    | Detected   | 2453.7   | Detected   | 1594.5   | Detected   | 2191.3   | Detected   | Clef1    | 0.954814815 | 0.69477124 | 0.89305946 | 0.6498349 |
| A_55_P1972 | 5391.4  | Detected   | 4003.7   | Detected   | 5175.6   | Detected   | 5147.7   | Detected   | Phka1    | 0.954798383 | 0.95997329 | 1.28573569 | 1.2927042 |
| A_55_P1988 | 16083.8 | Detected   | 15539.5  | Detected   | 12382.9  | Detected   | 15356.7  | Detected   | Lrrc47   | 0.954793022 | 0.7698989  | 0.98823643 | 0.7968661 |
| A_55_P1981 | 1501.6  | Detected   | 1358.6   | Detected   | 1479.1   | Detected   | 1433.7   | Detected   | Xrcc4    | 0.954781566 | 0.98501598 | 1.05527749 | 1.0886942 |
| A_55_P2003 | 698     | Detected   | 784.2    | Detected   | 885.9    | Detected   | 666.4    | Detected   | Tmem194  | 0.954727794 | 1.26919771 | 0.84978322 | 1.1296863 |
| A_55_P2122 | 2195.9  | Detected   | 2103.2   | Detected   | 2089.3   | Detected   | 2096.4   | Detected   | Arhgef3  | 0.954688283 | 0.95145498 | 0.99676683 | 0.993391  |
| A_52_P5821 | 12722.4 | Detected   | 10361.7  | Detected   | 11320.4  | Detected   | 12145.2  | Detected   | Gosr2    | 0.954631202 | 0.88980067 | 1.17212427 | 1.0925234 |
| A_55_P2059 | 27051.4 | Detected   | 25116.9  | Detected   | 30981.9  | Detected   | 25818.9  | Detected   | Fdx1     | 0.954438587 | 1.14529747 | 1.02794931 | 1.2335081 |
| A_51_P3147 | 103.1   | Detected   | 81.5     | Detected   | 89.9     | Detected   | 98.4     | Detected   | Cyth1    | 0.954413191 | 0.87196896 | 1.20736196 | 1.1030675 |
| A_52_P4515 | 5439.5  | Detected   | 5071.3   | Detected   | 4228.1   | Detected   | 5191.3   | Detected   | Xpr1     | 0.954370806 | 0.77729571 | 1.02366257 | 0.833731  |
| A_55_P2043 | 4674.3  | Detected   | 4562.2   | Detected   | 4557.2   | Detected   | 4460.9   | Detected   | Cdc42se1 | 0.954346105 | 0.97494812 | 0.9777958  | 0.998904  |
| A_51_P4640 | 44362.9 | Detected   | 36290.1  | Detected   | 54366.8  | Detected   | 42336.5  | Detected   | Fads3    | 0.954322193 | 1.22550149 | 1.16661293 | 1.4981166 |
| A_55_P2030 | 32923.3 | Detected   | 37210    | Detected   | 32775.5  | Detected   | 31417.8  | Detected   | Trim59   | 0.954272506 | 0.99551078 | 0.84433754 | 0.880825  |
| A_51_P2142 | 50.2    | Detected   | 52.1     | Detected   | 128.4    | Detected   | 47.9     | Detected   | Epha1    | 0.954183267 | 2.55776892 | 0.9193858  | 2.4644914 |
| A_55_P1995 | 32.7    | Detected   | 496.7    | Detected   | 18.5     | Detected   | 31.2     | Not Detect | Mpo      | 0.95412844  | 0.56574924 | 0.06281458 | 0.0372458 |
| A_55_P2129 | 77661.6 | Detected   | 70874.5  | Detected   | 99327.6  | Detected   | 74096.7  | Detected   | Ppap2c   | 0.954097005 | 1.27897957 | 1.04546346 | 1.4014575 |
| A_55_P2052 | 328.4   | Detected   | 345.8    | Detected   | 453.4    | Detected   | 313.3    | Detected   | Pih1d2   | 0.954019488 | 1.38063337 | 0.90601504 | 1.3111625 |
| A_66_P1257 | 180.5   | Detected   | 171.8    | Detected   | 164.7    | Detected   | 172.2    | Detected   | Ripply2  | 0.95401662  | 0.91246537 | 1.00232829 | 0.9586729 |
| A_51_P4539 | 10787.9 | Detected   | 11607.6  | Detected   | 9683.7   | Detected   | 10291.6  | Detected   | Drg1     | 0.953994753 | 0.89764458 | 0.886626   | 0.8342551 |

|            |          |            |          |            |          |            |          |            |               |             |            |            |           |
|------------|----------|------------|----------|------------|----------|------------|----------|------------|---------------|-------------|------------|------------|-----------|
| A_51_P2606 | 23836.9  | Detected   | 12675.4  | Detected   | 23362.8  | Detected   | 22739.8  | Detected   | Amdhd2        | 0.95397472  | 0.98011067 | 1.79401045 | 1.8431608 |
| A_55_P2032 | 28277.8  | Detected   | 22817.6  | Detected   | 25976.7  | Detected   | 26974.9  | Detected   | Tpm1          | 0.953924987 | 0.91862521 | 1.18219708 | 1.1384501 |
| A_51_P3289 | 4736.3   | Detected   | 3950.9   | Detected   | 5102.9   | Detected   | 4517.9   | Detected   | Zfp322a       | 0.953888056 | 1.07740219 | 1.1435116  | 1.2915791 |
| A_55_P1977 | 6785.9   | Detected   | 6698.5   | Detected   | 6181.8   | Detected   | 6472.8   | Detected   | Arglu1        | 0.95386021  | 0.91097717 | 0.96630589 | 0.9228633 |
| A_55_P2037 | 112.7    | Detected   | 106.6    | Detected   | 97.6     | Detected   | 107.5    | Detected   | Sp110         | 0.953859805 | 0.86601597 | 1.00844278 | 0.9155722 |
| A_55_P1960 | 5026.9   | Detected   | 4078.4   | Detected   | 4522.2   | Detected   | 4794.9   | Detected   | Setd1a        | 0.953848296 | 0.89960015 | 1.17568164 | 1.1088172 |
| A_55_P2027 | 13       | Not Detect | 9.1      | Not Detect | 17.4     | Detected   | 12.4     | Not Detect | Gpr156        | 0.953846154 | 1.33846154 | 1.36263736 | 1.9120879 |
| A_55_P2135 | 454721.7 | Detected   | 421986.2 | Detected   | 450343.5 | Detected   | 433711.9 | Detected   | Rplp0         | 0.953796355 | 0.99037169 | 1.02778693 | 1.0671996 |
| A_55_P2153 | 49.7     | Detected   | 40.5     | Detected   | 44.1     | Detected   | 47.4     | Not Detect | Mlxip         | 0.953722334 | 0.88732394 | 1.17037037 | 1.0888889 |
| A_66_P1007 | 11296    | Detected   | 12716.4  | Detected   | 12343.7  | Detected   | 10773    | Detected   | Kansl2        | 0.953700425 | 1.09274965 | 0.84717373 | 0.9706914 |
| A_52_P3681 | 1544.2   | Detected   | 2017.5   | Detected   | 1791.6   | Detected   | 1472.7   | Detected   | Nudcd1        | 0.953697708 | 1.16021241 | 0.72996283 | 0.8880297 |
| A_55_P2046 | 155400.8 | Detected   | 178795.9 | Detected   | 149370.5 | Detected   | 148201.3 | Detected   | Eif4a1        | 0.95367141  | 0.96119518 | 0.82888534 | 0.8354246 |
| A_52_P9674 | 483.1    | Detected   | 377.1    | Detected   | 645.4    | Detected   | 460.7    | Detected   | Ttc30b        | 0.953632788 | 1.33595529 | 1.22169186 | 1.7114824 |
| A_55_P2070 | 40975.6  | Detected   | 36845.8  | Detected   | 43042.5  | Detected   | 39075.2  | Detected   | Preb          | 0.953621179 | 1.05044221 | 1.06050622 | 1.1681793 |
| A_55_P2059 | 90791.5  | Detected   | 81381.8  | Detected   | 98570.7  | Detected   | 86579    | Detected   | H3f3b         | 0.953602485 | 1.08568203 | 1.06386194 | 1.2112131 |
| A_51_P3012 | 22789.3  | Detected   | 18097.4  | Detected   | 19175.2  | Detected   | 21731.9  | Detected   | Araf          | 0.953601032 | 0.84141242 | 1.20082995 | 1.0595555 |
| A_66_P1287 | 122421.8 | Detected   | 114138.7 | Detected   | 138734.6 | Detected   | 116737.8 | Detected   | Gm13981       | 0.953570361 | 1.13325078 | 1.02277142 | 1.2154913 |
| A_55_P2077 | 7040.7   | Detected   | 4228.6   | Detected   | 4340.6   | Detected   | 6713.6   | Detected   | Acap3         | 0.953541551 | 0.6165012  | 1.58766495 | 1.0264863 |
| A_55_P2076 | 225.9    | Detected   | 169      | Detected   | 179.9    | Detected   | 215.4    | Detected   | Cad           | 0.953519256 | 0.79637008 | 1.27455621 | 1.064497  |
| A_52_P1720 | 8.6      | Not Detect | 25.5     | Detected   | 11.9     | Not Detect | 8.2      | Not Detect | Ramp1         | 0.953488372 | 1.38372093 | 0.32156863 | 0.4666667 |
| A_51_P4003 | 34365.4  | Detected   | 30170.2  | Detected   | 35070.7  | Detected   | 32766.6  | Detected   | 0610007P14Rik | 0.953476462 | 1.02052355 | 1.08605843 | 1.1624285 |
| A_55_P2253 | 846      | Detected   | 947.9    | Detected   | 817.5    | Detected   | 806.6    | Detected   | 1700052N19Rik | 0.953427896 | 0.96631206 | 0.85093364 | 0.8624327 |
| A_52_P3758 | 31484.5  | Detected   | 29729.6  | Detected   | 26421.6  | Detected   | 30017.1  | Detected   | Arf3          | 0.953392939 | 0.83919389 | 1.0096705  | 0.8887304 |
| A_52_P6710 | 765.7    | Detected   | 630.9    | Detected   | 646.9    | Detected   | 730      | Detected   | Uba6          | 0.953375996 | 0.84484785 | 1.15707719 | 1.0253606 |
| A_52_P5102 | 178      | Detected   | 189.8    | Detected   | 187.6    | Detected   | 169.7    | Detected   | Gna15         | 0.953370787 | 1.05393258 | 0.89409905 | 0.9884089 |
| A_51_P3540 | 4950.1   | Detected   | 4165.5   | Detected   | 4101.3   | Detected   | 4718.8   | Detected   | Svil          | 0.953273671 | 0.82852872 | 1.13282919 | 0.9845877 |
| A_51_P2210 | 57.7     | Detected   | 189      | Detected   | 68.4     | Detected   | 55       | Detected   | Slc16a12      | 0.953206239 | 1.18544194 | 0.29100529 | 0.3619048 |
| A_51_P3316 | 7376.2   | Detected   | 7061     | Detected   | 6424.4   | Detected   | 7030.9   | Detected   | Ubiad1        | 0.953187278 | 0.87096337 | 0.99573715 | 0.9098428 |
| A_55_P1999 | 8912.9   | Detected   | 8957.4   | Detected   | 6693.3   | Detected   | 8495.2   | Detected   | Sec24b        | 0.953135343 | 0.7509677  | 0.94840021 | 0.7472369 |
| A_51_P3714 | 950.9    | Detected   | 759.1    | Detected   | 1109.4   | Detected   | 906.3    | Detected   | Fam175b       | 0.953097066 | 1.16668419 | 1.19391385 | 1.4614675 |
| A_65_P2064 | 3925.2   | Detected   | 2779.5   | Detected   | 3554     | Detected   | 3741     | Detected   | Fads2         | 0.953072455 | 0.90543157 | 1.34592553 | 1.2786472 |
| A_55_P2028 | 635      | Detected   | 573.9    | Detected   | 624.6    | Detected   | 605.2    | Detected   | Tcf20         | 0.953070866 | 0.98362205 | 1.05453912 | 1.0883429 |
| A_51_P5104 | 313.2    | Detected   | 280.7    | Detected   | 243.8    | Detected   | 298.5    | Detected   | Slc25a15      | 0.953065134 | 0.77841635 | 1.0634129  | 0.8685429 |
| A_52_P3004 | 1399.2   | Detected   | 1514.7   | Detected   | 1374.8   | Detected   | 1333.5   | Detected   | Dcp1a         | 0.953044597 | 0.98256146 | 0.88037235 | 0.9076385 |
| A_55_P2202 | 572.1    | Detected   | 708.9    | Detected   | 768      | Detected   | 545.2    | Detected   | BC028789      | 0.952980248 | 1.34242265 | 0.76907885 | 1.0833686 |
| A_55_P2022 | 87       | Detected   | 87.8     | Detected   | 64.7     | Detected   | 82.9     | Detected   | Slc38a6       | 0.952873563 | 0.74367816 | 0.94419134 | 0.7369021 |
| A_51_P5166 | 90672.7  | Detected   | 87783    | Detected   | 104026.5 | Detected   | 86397.9  | Detected   | Ndufb10       | 0.952854608 | 1.14727476 | 0.98422132 | 1.1850415 |
| A_55_P2074 | 29069.6  | Detected   | 25837.3  | Detected   | 36593.4  | Detected   | 27695.9  | Detected   | Fh1           | 0.952744448 | 1.25882021 | 1.07193476 | 1.4163012 |
| A_55_P2031 | 10254.9  | Detected   | 8909.4   | Detected   | 9601.2   | Detected   | 9769.5   | Detected   | Pithd1        | 0.95266653  | 0.93625486 | 1.09653849 | 1.0776483 |
| A_55_P2005 | 12361.9  | Detected   | 11991.2  | Detected   | 11651.8  | Detected   | 11776.2  | Detected   | Ipo11         | 0.952620552 | 0.94255737 | 0.98207018 | 0.9716959 |



|            |          |          |          |            |          |            |          |            |               |             |            |            |           |
|------------|----------|----------|----------|------------|----------|------------|----------|------------|---------------|-------------|------------|------------|-----------|
| A_66_P1144 | 21.1     | Detected | 43.6     | Detected   | 19.2     | Detected   | 20.1     | Not Detect | Gm7978        | 0.952606635 | 0.90995261 | 0.46100917 | 0.440367  |
| A_51_P3194 | 1194.2   | Detected | 964.6    | Detected   | 961.7    | Detected   | 1137.6   | Detected   | Zfp143        | 0.952604254 | 0.80530899 | 1.17934895 | 0.9969936 |
| A_55_P2021 | 17258.7  | Detected | 16117.4  | Detected   | 13834.8  | Detected   | 16440.6  | Detected   | Crlf3         | 0.95259782  | 0.8016131  | 1.02005286 | 0.8583767 |
| A_51_P5053 | 23262.1  | Detected | 15355.1  | Detected   | 20489.8  | Detected   | 22159.1  | Detected   | Mpnd          | 0.952583817 | 0.88082331 | 1.44311011 | 1.334397  |
| A_55_P2152 | 376522.6 | Detected | 347317.9 | Detected   | 358368   | Detected   | 358656.2 | Detected   | LOC100045367  | 0.952548931 | 0.95178351 | 1.03264531 | 1.0318155 |
| A_55_P2134 | 3087.9   | Detected | 3153.7   | Detected   | 2948.7   | Detected   | 2941.2   | Detected   | Cinp          | 0.952491985 | 0.95492082 | 0.93261883 | 0.934997  |
| A_66_P1334 | 2758.7   | Detected | 2299.2   | Detected   | 2275.1   | Detected   | 2627.6   | Detected   | 2810417H13Rik | 0.952477616 | 0.82470004 | 1.14283229 | 0.9895181 |
| A_55_P2039 | 177918.7 | Detected | 177355.6 | Detected   | 149905.6 | Detected   | 169456.5 | Detected   | ND2           | 0.952437827 | 0.84255112 | 0.9554618  | 0.8452262 |
| A_52_P1296 | 216.5    | Detected | 144.6    | Detected   | 215.1    | Detected   | 206.2    | Detected   | Stradb        | 0.952424942 | 0.99353349 | 1.42600277 | 1.4875519 |
| A_55_P1978 | 16.8     | Detected | 5.3      | Not Detect | 22.3     | Detected   | 16       | Not Detect | Micalcl       | 0.952380952 | 1.32738095 | 3.01886792 | 4.2075472 |
| A_66_P1172 | 11594.7  | Detected | 11914.7  | Detected   | 13958.1  | Detected   | 11041.7  | Detected   | Snx6          | 0.952305795 | 1.20383451 | 0.92672917 | 1.1715024 |
| A_51_P4858 | 21015.2  | Detected | 19097.9  | Detected   | 19683.7  | Detected   | 20009.6  | Detected   | Srsf1         | 0.952148921 | 0.9366411  | 1.04773823 | 1.0306735 |
| A_55_P2086 | 18.8     | Detected | 20.8     | Detected   | 24.5     | Detected   | 17.9     | Not Detect | Gpr137c       | 0.95212766  | 1.30319149 | 0.86057692 | 1.1778846 |
| A_55_P2064 | 16.7     | Detected | 78.6     | Detected   | 24.5     | Detected   | 15.9     | Not Detect | Dnaic2        | 0.952095808 | 1.46706587 | 0.20229008 | 0.3117048 |
| A_52_P4174 | 1380.6   | Detected | 2519.6   | Detected   | 914      | Detected   | 1314.3   | Detected   | Gab1          | 0.951977401 | 0.662031   | 0.52163042 | 0.362756  |
| A_55_P2098 | 122676.5 | Detected | 113901   | Detected   | 136192.2 | Detected   | 116783.2 | Detected   | Rps19         | 0.951960644 | 1.11017351 | 1.02530443 | 1.1957068 |
| A_52_P1993 | 60.3     | Detected | 45.8     | Detected   | 50.4     | Detected   | 57.4     | Detected   | A830010M20Rik | 0.951907131 | 0.8358209  | 1.25327511 | 1.1004367 |
| A_55_P1961 | 315043.6 | Detected | 289455.6 | Detected   | 303887.3 | Detected   | 299882.2 | Detected   | Rpl23         | 0.951875233 | 0.96458808 | 1.03602141 | 1.0498581 |
| A_55_P1963 | 180466.8 | Detected | 200608.5 | Detected   | 199987.3 | Detected   | 171780.6 | Detected   | Gm6109        | 0.951868155 | 1.10816671 | 0.85629771 | 0.9969034 |
| A_55_P2068 | 17543.4  | Detected | 16516.4  | Detected   | 13860.4  | Detected   | 16698.7  | Detected   | Nufip2        | 0.951850838 | 0.7900635  | 1.01103751 | 0.8391901 |
| A_51_P1982 | 1063.7   | Detected | 974.6    | Detected   | 1051     | Detected   | 1012.4   | Detected   | Mrps2         | 0.951772116 | 0.98806054 | 1.03878514 | 1.0783911 |
| A_55_P2038 | 219378.5 | Detected | 205461.7 | Detected   | 241023.3 | Detected   | 208781.5 | Detected   | Ubb           | 0.951695358 | 1.09866418 | 1.01615776 | 1.1730814 |
| A_52_P6373 | 1068     | Detected | 743.8    | Detected   | 935.8    | Detected   | 1016.4   | Detected   | Zbtb43        | 0.951685393 | 0.87621723 | 1.36649637 | 1.2581339 |
| A_55_P2030 | 193345.5 | Detected | 188617.8 | Detected   | 193571.8 | Detected   | 183986   | Detected   | Rpl3          | 0.951591839 | 1.00117044 | 0.97544346 | 1.0262648 |
| A_55_P2070 | 163.1    | Detected | 207.1    | Detected   | 143.1    | Detected   | 155.2    | Detected   | Sp6           | 0.951563458 | 0.87737584 | 0.74939643 | 0.6909705 |
| A_55_P2034 | 7776.4   | Detected | 6826.6   | Detected   | 5428.4   | Detected   | 7399.4   | Detected   | Socs7         | 0.951519984 | 0.6980608  | 1.08390707 | 0.7951835 |
| A_55_P2283 | 16.5     | Detected | 18.6     | Detected   | 12.5     | Not Detect | 15.7     | Not Detect | Gm10732       | 0.951515152 | 0.75757576 | 0.84408602 | 0.672043  |
| A_55_P2222 | 33       | Detected | 37.9     | Detected   | 29.8     | Detected   | 31.4     | Not Detect | B930018H19Rik | 0.951515152 | 0.9030303  | 0.82849604 | 0.7862797 |
| A_51_P3294 | 7235.1   | Detected | 7711.5   | Detected   | 5344.1   | Detected   | 6884.1   | Detected   | Pomgnt1       | 0.951486503 | 0.73863526 | 0.8927057  | 0.693004  |
| A_52_P4058 | 259.3    | Detected | 295.6    | Detected   | 274      | Detected   | 246.7    | Detected   | Zfp938        | 0.951407636 | 1.05669109 | 0.83457375 | 0.9269283 |
| A_55_P2144 | 176353   | Detected | 192167.9 | Detected   | 198960.9 | Detected   | 167740.2 | Detected   | Psmb5         | 0.951161591 | 1.12819686 | 0.87288356 | 1.0353493 |
| A_55_P2104 | 26.6     | Detected | 45.2     | Detected   | 32       | Detected   | 25.3     | Not Detect | 5430425K12Rik | 0.95112782  | 1.20300752 | 0.55973451 | 0.7079646 |
| A_66_P1034 | 5745.4   | Detected | 4773.6   | Detected   | 5902.6   | Detected   | 5464.4   | Detected   | Srsf1         | 0.951091308 | 1.02736102 | 1.14471259 | 1.2365091 |
| A_55_P2185 | 18.4     | Detected | 20.4     | Detected   | 29.9     | Detected   | 17.5     | Not Detect | Gm5258        | 0.951086957 | 1.625      | 0.85784314 | 1.4656863 |
| A_55_P2035 | 10684.9  | Detected | 8224.1   | Detected   | 8611.6   | Detected   | 10162.2  | Detected   | Uxt           | 0.951080497 | 0.80595981 | 1.23566104 | 1.0471176 |
| A_51_P1153 | 54260.8  | Detected | 41014.3  | Detected   | 54235.3  | Detected   | 51605.3  | Detected   | Surf4         | 0.951060434 | 0.99953005 | 1.25822701 | 1.322351  |
| A_66_P1393 | 19643.3  | Detected | 15199.5  | Detected   | 17499.7  | Detected   | 18681.6  | Detected   | Cog1          | 0.951041831 | 0.89087373 | 1.22909306 | 1.1513339 |
| A_55_P1952 | 201645.3 | Detected | 215955.9 | Detected   | 219362.6 | Detected   | 191767.1 | Detected   | Rpl30         | 0.951012    | 1.08786369 | 0.88799195 | 1.015775  |
| A_66_P1306 | 1222.5   | Detected | 896.2    | Detected   | 1047.9   | Detected   | 1162.6   | Detected   | Pdzd8         | 0.951002045 | 0.85717791 | 1.29725508 | 1.1692703 |
| A_52_P4392 | 279.5    | Detected | 259      | Detected   | 213.9    | Detected   | 265.8    | Detected   | Itgb1bp1      | 0.9509839   | 0.76529517 | 1.02625483 | 0.8258687 |

|            |          |          |          |          |          |          |          |            |               |             |            |            |           |
|------------|----------|----------|----------|----------|----------|----------|----------|------------|---------------|-------------|------------|------------|-----------|
| A_55_P1983 | 58445.3  | Detected | 43761    | Detected | 44718.4  | Detected | 55580.5  | Detected   | Flot2         | 0.950983227 | 0.76513253 | 1.27009209 | 1.0218779 |
| A_51_P3538 | 2250.3   | Detected | 2522.6   | Detected | 2420     | Detected | 2139.8   | Detected   | Ubac2         | 0.950895436 | 1.07541217 | 0.8482518  | 0.9593277 |
| A_55_P2140 | 928.1    | Detected | 720.3    | Detected | 830.2    | Detected | 882.5    | Detected   | Arl5b         | 0.950867363 | 0.89451568 | 1.22518395 | 1.1525753 |
| A_55_P2061 | 323.5    | Detected | 459.2    | Detected | 886.9    | Detected | 307.6    | Detected   | Fads6         | 0.950850077 | 2.74157651 | 0.66986063 | 1.9314024 |
| A_52_P1088 | 103.5    | Detected | 100      | Detected | 76.1     | Detected | 98.4     | Detected   | St8sia1       | 0.950724638 | 0.7352657  | 0.984      | 0.761     |
| A_51_P3333 | 29339.1  | Detected | 25028.1  | Detected | 20488.2  | Detected | 27892.6  | Detected   | Tmem120a      | 0.950697192 | 0.69832408 | 1.11445136 | 0.8186079 |
| A_55_P2448 | 2163.3   | Detected | 1975.8   | Detected | 1938.5   | Detected | 2056.5   | Detected   | Sfxn2         | 0.95063098  | 0.89608469 | 1.04084422 | 0.9811216 |
| A_55_P2024 | 255099.2 | Detected | 229637.4 | Detected | 282612   | Detected | 242494.5 | Detected   | Rpl7a         | 0.950589026 | 1.10785138 | 1.0559887  | 1.230688  |
| A_55_P2024 | 37142.5  | Detected | 54310    | Detected | 27517.4  | Detected | 35304.3  | Detected   | Cpe           | 0.950509524 | 0.7408602  | 0.65005156 | 0.5066728 |
| A_55_P1979 | 11219.3  | Detected | 9976.3   | Detected | 10292.6  | Detected | 10664    | Detected   | Crcp          | 0.950504933 | 0.91740126 | 1.06893337 | 1.0317051 |
| A_52_P2900 | 314.8    | Detected | 335.5    | Detected | 380.5    | Detected | 299.2    | Detected   | Memo1         | 0.950444727 | 1.20870394 | 0.89180328 | 1.1341282 |
| A_52_P1237 | 945      | Detected | 787.3    | Detected | 950.6    | Detected | 898.1    | Detected   | Rnf41         | 0.95037037  | 1.00592593 | 1.14073415 | 1.2074178 |
| A_55_P1983 | 116.8    | Detected | 84       | Detected | 96.3     | Detected | 111      | Detected   | 4930444P10Rik | 0.950342466 | 0.8244863  | 1.32142857 | 1.1464286 |
| A_55_P1952 | 30.2     | Detected | 37.6     | Detected | 29.8     | Detected | 28.7     | Not Detect | C030016D13Rik | 0.950331126 | 0.98675497 | 0.76329787 | 0.7925532 |
| A_51_P1596 | 1085     | Detected | 950.8    | Detected | 805.4    | Detected | 1031.1   | Detected   | Ccdc120       | 0.950322581 | 0.74230415 | 1.0844552  | 0.8470761 |
| A_52_P6581 | 29976.5  | Detected | 23916.6  | Detected | 27367.9  | Detected | 28486.1  | Detected   | Ets2          | 0.950281053 | 0.9129785  | 1.19105977 | 1.1443056 |
| A_55_P2054 | 2319.5   | Detected | 5060.6   | Detected | 2005.2   | Detected | 2204.1   | Detected   | Tcf4          | 0.950247898 | 0.86449666 | 0.43554124 | 0.3962376 |
| A_66_P1399 | 46.2     | Detected | 43.7     | Detected | 41.2     | Detected | 43.9     | Detected   | Gm7894        | 0.95021645  | 0.89177489 | 1.00457666 | 0.9427918 |
| A_55_P2086 | 2107.4   | Detected | 1899     | Detected | 1573.2   | Detected | 2002.4   | Detected   | Safb2         | 0.950175572 | 0.74651229 | 1.05444971 | 0.828436  |
| A_55_P2173 | 86.3     | Detected | 131.5    | Detected | 85.3     | Detected | 82       | Detected   | Pkhd1         | 0.950173812 | 0.98841251 | 0.62357414 | 0.6486692 |
| A_52_P2076 | 44.1     | Detected | 37       | Detected | 31.2     | Detected | 41.9     | Not Detect | Syt12         | 0.950113379 | 0.70748299 | 1.13243243 | 0.8432432 |
| A_51_P1371 | 1044.4   | Detected | 824.2    | Detected | 1203.1   | Detected | 992.2    | Detected   | Chek2         | 0.95001915  | 1.15195327 | 1.20383402 | 1.4597185 |
| A_55_P2005 | 2468.9   | Detected | 1438.2   | Detected | 1392     | Detected | 2345.5   | Detected   | Meis3         | 0.950018227 | 0.56381384 | 1.63085802 | 0.9678765 |
| A_51_P3704 | 3358.1   | Detected | 3103.4   | Detected | 3605.3   | Detected | 3189.9   | Detected   | Cyp20a1       | 0.949912153 | 1.07361306 | 1.02787266 | 1.1617258 |
| A_55_P2095 | 1243.7   | Detected | 1270.2   | Detected | 1119.7   | Detected | 1181.4   | Detected   | Dhx37         | 0.949907534 | 0.9002975  | 0.93008975 | 0.8815147 |
| A_66_P1227 | 10255.2  | Detected | 13715.2  | Detected | 10879.3  | Detected | 9741.4   | Detected   | Tsr1          | 0.949898588 | 1.06085693 | 0.71026307 | 0.7932294 |
| A_51_P2119 | 8466.8   | Detected | 8834.7   | Detected | 7115.4   | Detected | 8042     | Detected   | Larp7         | 0.949827562 | 0.84038834 | 0.91027426 | 0.8053924 |
| A_55_P2058 | 55.7     | Detected | 40.9     | Detected | 39.8     | Detected | 52.9     | Detected   | Fktn          | 0.9497307   | 0.71454219 | 1.29339853 | 0.9731051 |
| A_55_P2092 | 7494.7   | Detected | 5541.6   | Detected | 5522.3   | Detected | 7117.6   | Detected   | Tbc1d25       | 0.949684444 | 0.73682736 | 1.2843944  | 0.9965173 |
| A_55_P1963 | 208652.7 | Detected | 204128.3 | Detected | 232592.3 | Detected | 198151.8 | Detected   | Rps13         | 0.94967283  | 1.1147342  | 0.97072185 | 1.1394417 |
| A_55_P2000 | 13542    | Detected | 12335.6  | Detected | 13332    | Detected | 12860.3  | Detected   | Ahcy          | 0.949660316 | 0.98449269 | 1.04253543 | 1.0807743 |
| A_52_P6565 | 756.8    | Detected | 494.5    | Detected | 882      | Detected | 718.7    | Detected   | Ogt           | 0.949656448 | 1.1654334  | 1.45338726 | 1.7836198 |
| A_55_P2042 | 281586   | Detected | 260105.1 | Detected | 277889.6 | Detected | 267409.7 | Detected   | Gm10653       | 0.949655523 | 0.98687293 | 1.02808326 | 1.0683743 |
| A_52_P1704 | 1045.7   | Detected | 934.4    | Detected | 915.5    | Detected | 993      | Detected   | Rps6kb1       | 0.949603137 | 0.8754901  | 1.06271404 | 0.9797731 |
| A_51_P1412 | 960.3    | Detected | 1064.1   | Detected | 1282.5   | Detected | 911.9    | Detected   | Zfp191        | 0.949599084 | 1.33552015 | 0.85696833 | 1.2052439 |
| A_55_P2410 | 43.6     | Detected | 37.7     | Detected | 28.6     | Detected | 41.4     | Not Detect | 9330156P08Rik | 0.949541284 | 0.6559633  | 1.09814324 | 0.7586207 |
| A_51_P4732 | 7525     | Detected | 5610.9   | Detected | 7945     | Detected | 7144.9   | Detected   | Zbtb7b        | 0.949488372 | 1.05581395 | 1.27339642 | 1.4159939 |
| A_51_P4030 | 2177.3   | Detected | 1744.6   | Detected | 1816.1   | Detected | 2067.3   | Detected   | Heatr5b       | 0.949478712 | 0.83410646 | 1.18497077 | 1.0409836 |
| A_55_P2048 | 7960.2   | Detected | 4314.7   | Detected | 7991.6   | Detected | 7558     | Detected   | Mdfic         | 0.949473631 | 1.00394462 | 1.7516861  | 1.8521798 |
| A_55_P2105 | 19752.1  | Detected | 17722.9  | Detected | 24792.8  | Detected | 18752.4  | Detected   | Wdr61         | 0.94938766  | 1.25519818 | 1.05808869 | 1.3989133 |

|            |          |          |          |          |          |          |          |            |               |             |            |            |           |
|------------|----------|----------|----------|----------|----------|----------|----------|------------|---------------|-------------|------------|------------|-----------|
| A_51_P2309 | 422.5    | Detected | 1050.1   | Detected | 70.5     | Detected | 401.1    | Detected   | Copz2         | 0.949349112 | 0.16686391 | 0.38196362 | 0.0671365 |
| A_55_P1995 | 596.1    | Detected | 766.9    | Detected | 190.9    | Detected | 565.9    | Detected   | Prr7          | 0.94933736  | 0.32024828 | 0.73790585 | 0.2489242 |
| A_55_P1968 | 247549.7 | Detected | 215894.8 | Detected | 268797   | Detected | 234995.2 | Detected   | Gm5766        | 0.949284931 | 1.08583044 | 1.08847087 | 1.2450369 |
| A_55_P2105 | 1352.3   | Detected | 1019.4   | Detected | 1198.3   | Detected | 1283.7   | Detected   | 2310007L24Rik | 0.949271611 | 0.88611994 | 1.25927016 | 1.1754954 |
| A_55_P1992 | 67       | Detected | 57.8     | Detected | 58.3     | Detected | 63.6     | Detected   | Zkscan2       | 0.949253731 | 0.87014925 | 1.10034602 | 1.0086505 |
| A_55_P2033 | 39.4     | Detected | 28.2     | Detected | 27.2     | Detected | 37.4     | Not Detect | Gm13298       | 0.949238579 | 0.69035533 | 1.32624113 | 0.964539  |
| A_55_P2100 | 185.1    | Detected | 204.7    | Detected | 128.7    | Detected | 175.7    | Detected   | Sprtn         | 0.94921664  | 0.69529984 | 0.85832926 | 0.628725  |
| A_55_P2041 | 47.2     | Detected | 42.4     | Detected | 42.1     | Detected | 44.8     | Not Detect | Sec22a        | 0.949152542 | 0.89194915 | 1.05660377 | 0.9929245 |
| A_55_P2013 | 204.5    | Detected | 172.3    | Detected | 170      | Detected | 194.1    | Detected   | 1700028J19Rik | 0.949144254 | 0.83129584 | 1.12652351 | 0.9866512 |
| A_66_P1107 | 26472.8  | Detected | 22221.6  | Detected | 28094.8  | Detected | 25126.2  | Detected   | Ppp1r11       | 0.949132695 | 1.06127044 | 1.13071066 | 1.2643014 |
| A_55_P1992 | 26704.4  | Detected | 20588    | Detected | 24064    | Detected | 25345.9  | Detected   | Hmgb3         | 0.949128234 | 0.90112491 | 1.23110064 | 1.1688362 |
| A_55_P2023 | 163.1    | Detected | 201.7    | Detected | 206.1    | Detected | 154.8    | Detected   | Polg2         | 0.949110975 | 1.26364194 | 0.76747645 | 1.0218146 |
| A_55_P1960 | 218495.7 | Detected | 194892.8 | Detected | 234359.2 | Detected | 207373.3 | Detected   | Gm19843       | 0.949095566 | 1.07260326 | 1.06403777 | 1.2025031 |
| A_51_P4949 | 6491.9   | Detected | 5815.5   | Detected | 6213.7   | Detected | 6161.4   | Detected   | Diablo        | 0.949090405 | 0.9571466  | 1.05947898 | 1.0684722 |
| A_65_P0535 | 38824.7  | Detected | 39992.3  | Detected | 31053.3  | Detected | 36842.3  | Detected   | ND1           | 0.948939721 | 0.79983361 | 0.92123484 | 0.776482  |
| A_55_P2039 | 101.8    | Detected | 89       | Detected | 79.8     | Detected | 96.6     | Detected   | Zfp395        | 0.94891945  | 0.78388998 | 1.08539326 | 0.8966292 |
| A_52_P3840 | 39.1     | Detected | 33.6     | Detected | 28.7     | Detected | 37.1     | Not Detect | Agbl2         | 0.948849105 | 0.73401535 | 1.10416667 | 0.8541667 |
| A_55_P1972 | 6370.2   | Detected | 4938.3   | Detected | 4927     | Detected | 6044.1   | Detected   | Pdzd11        | 0.948808515 | 0.7734451  | 1.22392321 | 0.9977118 |
| A_51_P1597 | 2161.9   | Detected | 1888.3   | Detected | 1851     | Detected | 2051.2   | Detected   | Car7          | 0.948795041 | 0.85619131 | 1.08626807 | 0.9802468 |
| A_51_P2216 | 11435.1  | Detected | 11532.7  | Detected | 11400.6  | Detected | 10849.4  | Detected   | Stk24         | 0.948780509 | 0.99698297 | 0.94075108 | 0.9885456 |
| A_66_P1271 | 9596.8   | Detected | 6170.6   | Detected | 9643.4   | Detected | 9104.5   | Detected   | Ankrd16       | 0.948701651 | 1.00485579 | 1.4754643  | 1.5627978 |
| A_55_P2179 | 8404.9   | Detected | 7578.9   | Detected | 7737.6   | Detected | 7972.7   | Detected   | Mrpl15        | 0.948577615 | 0.92060584 | 1.05196005 | 1.0209397 |
| A_52_P3739 | 15129.6  | Detected | 12370.5  | Detected | 14226.5  | Detected | 14350.5  | Detected   | Mex3c         | 0.948504918 | 0.94030906 | 1.1600582  | 1.1500344 |
| A_52_P6394 | 19.4     | Detected | 17.4     | Detected | 17.7     | Detected | 18.4     | Not Detect | Kcnk3         | 0.948453608 | 0.91237113 | 1.05747126 | 1.0172414 |
| A_52_P6726 | 34.9     | Detected | 27.8     | Detected | 19.5     | Detected | 33.1     | Not Detect | Olf974        | 0.948424069 | 0.55873926 | 1.19064748 | 0.7014388 |
| A_55_P2065 | 23981.4  | Detected | 22636.1  | Detected | 24690.6  | Detected | 22744.3  | Detected   | Siva1         | 0.948414188 | 1.02957292 | 1.00477998 | 1.0907621 |
| A_51_P1166 | 141.2    | Detected | 133.2    | Detected | 164.9    | Detected | 133.9    | Detected   | 4933411K16Rik | 0.948300283 | 1.16784703 | 1.00525526 | 1.237988  |
| A_55_P1986 | 1368.2   | Detected | 1136.2   | Detected | 1054.1   | Detected | 1297.3   | Detected   | Fip111        | 0.948180091 | 0.7704283  | 1.14178842 | 0.9277416 |
| A_51_P3006 | 57.8     | Detected | 102.1    | Detected | 353      | Detected | 54.8     | Detected   | Crb2          | 0.948096886 | 6.10726644 | 0.5367287  | 3.4573947 |
| A_55_P2106 | 934.1    | Detected | 604.7    | Detected | 545.6    | Detected | 885.6    | Detected   | Pxdc1         | 0.948078364 | 0.58409164 | 1.46452787 | 0.9022656 |
| A_51_P3961 | 200.3    | Detected | 237.8    | Detected | 190      | Detected | 189.9    | Detected   | Mdm1          | 0.948077883 | 0.94857713 | 0.79857023 | 0.7989907 |
| A_55_P2413 | 59.7     | Detected | 60.3     | Detected | 59.7     | Detected | 56.6     | Detected   | Gm20611       | 0.948073702 | 1          | 0.93864013 | 0.9900498 |
| A_66_P1340 | 2308.7   | Detected | 1875     | Detected | 2597.8   | Detected | 2188.8   | Detected   | Grpel2        | 0.948066011 | 1.12522199 | 1.16736    | 1.3854933 |
| A_55_P1983 | 258379.8 | Detected | 253765.8 | Detected | 294624.9 | Detected | 244957.2 | Detected   | Rps29         | 0.948050893 | 1.14027838 | 0.96528847 | 1.1610111 |
| A_55_P2015 | 132.7    | Detected | 132.8    | Detected | 115.6    | Detected | 125.8    | Detected   | Tmcc1         | 0.948003014 | 0.87113791 | 0.94728916 | 0.8704819 |
| A_51_P2346 | 1253.1   | Detected | 1119.1   | Detected | 1686.2   | Detected | 1187.8   | Detected   | Nubpl         | 0.947889235 | 1.34562286 | 1.06138862 | 1.5067465 |
| A_52_P6689 | 681      | Detected | 446      | Detected | 1124.4   | Detected | 645.5    | Detected   | Tmem243       | 0.947870778 | 1.65110132 | 1.44730942 | 2.5210762 |
| A_52_P2440 | 8487.1   | Detected | 9200.4   | Detected | 7507.6   | Detected | 8044.3   | Detected   | Ube2g2        | 0.947826702 | 0.88458955 | 0.87434242 | 0.816008  |
| A_51_P2732 | 2302.9   | Detected | 2394.1   | Detected | 2395.8   | Detected | 2182.7   | Detected   | Gpaa1         | 0.947804942 | 1.04034044 | 0.91169959 | 1.0007101 |
| A_66_P1160 | 38.3     | Detected | 51.6     | Detected | 66.1     | Detected | 36.3     | Not Detect | 2410088K16Rik | 0.947780679 | 1.72584856 | 0.70348837 | 1.2810078 |

|            |                   |                   |                   |                   |               |             |            |            |           |
|------------|-------------------|-------------------|-------------------|-------------------|---------------|-------------|------------|------------|-----------|
| A_55_P1997 | 396.3 Detected    | 164.8 Detected    | 277.5 Detected    | 375.6 Detected    | Pknx1         | 0.947766843 | 0.7002271  | 2.27912621 | 1.6838592 |
| A_51_P4764 | 76.5 Detected     | 63.7 Detected     | 55.4 Detected     | 72.5 Detected     | Olfr456       | 0.947712418 | 0.72418301 | 1.13814757 | 0.8697017 |
| A_55_P2037 | 105 Detected      | 147.6 Detected    | 59.9 Detected     | 99.5 Detected     | Palmd         | 0.947619048 | 0.57047619 | 0.67411924 | 0.4058266 |
| A_52_P3765 | 865.8 Detected    | 737.6 Detected    | 802.3 Detected    | 820.4 Detected    | Orc4          | 0.947562948 | 0.92665743 | 1.11225597 | 1.0877169 |
| A_51_P4964 | 9753.3 Detected   | 9614.8 Detected   | 9271.7 Detected   | 9241.5 Detected   | Med9          | 0.947525453 | 0.95062184 | 0.96117444 | 0.9643154 |
| A_52_P2766 | 32858.2 Detected  | 27387 Detected    | 28710.3 Detected  | 31133.7 Detected  | Ptp4a2        | 0.947516906 | 0.87376363 | 1.13680578 | 1.0483185 |
| A_55_P2109 | 125.7 Detected    | 96.8 Detected     | 99.5 Detected     | 119.1 Detected    | Trav9d-3      | 0.947494033 | 0.79156722 | 1.2303719  | 1.0278926 |
| A_55_P1964 | 14299.2 Detected  | 14793.9 Detected  | 13474.1 Detected  | 13548.3 Detected  | Kbtbd2        | 0.947486573 | 0.94229747 | 0.91580314 | 0.9107876 |
| A_51_P2822 | 9.5 Not Detect    | 4.4 Not Detect    | 19.3 Detected     | 9 Not Detect      | Ltb4r2        | 0.947368421 | 2.03157895 | 2.04545455 | 4.3863636 |
| A_52_P6442 | 60.6 Detected     | 58.5 Detected     | 61.7 Detected     | 57.4 Detected     | Capn12        | 0.947194719 | 1.01815182 | 0.98119658 | 1.0547009 |
| A_52_P3580 | 2026.3 Detected   | 1246.6 Detected   | 1663.4 Detected   | 1919.3 Detected   | Fbxo10        | 0.947194394 | 0.8209051  | 1.53962779 | 1.3343494 |
| A_51_P4568 | 2799.6 Detected   | 2692.3 Detected   | 2439.2 Detected   | 2651.5 Detected   | Ift122        | 0.947099586 | 0.87126732 | 0.98484567 | 0.9059912 |
| A_55_P2011 | 20565.8 Detected  | 21940.5 Detected  | 15920.7 Detected  | 19476.5 Detected  | Figl1         | 0.947033424 | 0.77413473 | 0.88769627 | 0.7256307 |
| A_51_P3019 | 2187.8 Detected   | 2199.7 Detected   | 2364 Detected     | 2071.8 Detected   | Trmt10c       | 0.9469787   | 1.08053753 | 0.94185571 | 1.074692  |
| A_52_P5992 | 5420.2 Detected   | 2794.4 Detected   | 5231 Detected     | 5132.8 Detected   | Mdfic         | 0.946976126 | 0.96509354 | 1.83681649 | 1.8719582 |
| A_66_P1118 | 4681.5 Detected   | 4453.7 Detected   | 3934.3 Detected   | 4432.5 Detected   | Snx13         | 0.946811919 | 0.84039304 | 0.99523991 | 0.8833779 |
| A_55_P2320 | 187.8 Detected    | 136.8 Detected    | 124.6 Detected    | 177.8 Detected    | Med9os        | 0.946751864 | 0.66347178 | 1.2997076  | 0.9108187 |
| A_51_P1285 | 39.4 Detected     | 35.7 Detected     | 23.8 Detected     | 37.3 Not Detect   | Scgb1a1       | 0.946700508 | 0.60406091 | 1.04481793 | 0.6666667 |
| A_55_P2060 | 9837.9 Detected   | 8506.3 Detected   | 12066.9 Detected  | 9313.3 Detected   | Tm2d3         | 0.946675612 | 1.22657274 | 1.09487086 | 1.4185839 |
| A_52_P2524 | 3315.4 Detected   | 3430.5 Detected   | 4157.4 Detected   | 3138.5 Detected   | 2700062C07Rik | 0.946642939 | 1.25396634 | 0.91488121 | 1.2118933 |
| A_52_P8251 | 23139.4 Detected  | 20530 Detected    | 24024.6 Detected  | 21903.4 Detected  | Nmt1          | 0.946584613 | 1.0382551  | 1.06689722 | 1.1702192 |
| A_55_P2001 | 8442.7 Detected   | 5109.3 Detected   | 15133.8 Detected  | 7991.4 Detected   | Rom1          | 0.946545536 | 1.79253083 | 1.56408901 | 2.9620105 |
| A_55_P2177 | 66294.1 Detected  | 63898 Detected    | 63955.4 Detected  | 62747.2 Detected  | Slc25a5       | 0.946497501 | 0.96472235 | 0.98199005 | 1.0008983 |
| A_55_P2055 | 1516.8 Detected   | 7897.5 Detected   | 296.1 Detected    | 1435.5 Detected   | Enpp2         | 0.946400316 | 0.19521361 | 0.18176638 | 0.0374929 |
| A_55_P2095 | 68.9 Detected     | 68 Detected       | 52 Detected       | 65.2 Detected     | 1700012I11Rik | 0.946298984 | 0.75471698 | 0.95882353 | 0.7647059 |
| A_51_P2053 | 57.7 Detected     | 182.7 Detected    | 38.4 Detected     | 54.6 Detected     | Uox           | 0.94627383  | 0.66551127 | 0.29885057 | 0.2101806 |
| A_55_P2187 | 253 Detected      | 222.8 Detected    | 293.5 Detected    | 239.4 Detected    | Gm4884        | 0.946245059 | 1.16007905 | 1.07450628 | 1.317325  |
| A_51_P5135 | 11578.6 Detected  | 10445.3 Detected  | 8734.7 Detected   | 10956 Detected    | Spag5         | 0.946228387 | 0.75438309 | 1.0488928  | 0.8362326 |
| A_55_P2237 | 235.9 Detected    | 196.1 Detected    | 195.7 Detected    | 223.2 Detected    | Tsc22d2       | 0.946163629 | 0.82958881 | 1.1381948  | 0.9979602 |
| A_51_P2584 | 3991.8 Detected   | 2763.8 Detected   | 4415.1 Detected   | 3776.8 Detected   | Zdhhc3        | 0.946139586 | 1.10604239 | 1.36652435 | 1.5974745 |
| A_55_P1999 | 42.7 Detected     | 55.8 Detected     | 32.8 Detected     | 40.4 Not Detect   | Zfp781        | 0.946135831 | 0.76814988 | 0.72401434 | 0.5878136 |
| A_55_P1956 | 193302.3 Detected | 205174.2 Detected | 230192.1 Detected | 182885.5 Detected | Gm4832        | 0.94611135  | 1.19083994 | 0.89136695 | 1.1219349 |
| A_51_P3350 | 21026.8 Detected  | 15472 Detected    | 16346 Detected    | 19893.3 Detected  | Gnb1          | 0.946092606 | 0.77738886 | 1.28576138 | 1.0564891 |
| A_55_P2005 | 3347 Detected     | 2863.8 Detected   | 2739.4 Detected   | 3166.4 Detected   | Ticrr         | 0.946041231 | 0.8184643  | 1.1056638  | 0.9565612 |
| A_52_P6281 | 1548.5 Detected   | 637.7 Detected    | 2765.8 Detected   | 1464.9 Detected   | Abcc5         | 0.94601227  | 1.7861156  | 2.29716167 | 4.3371491 |
| A_55_P2052 | 22995.4 Detected  | 18939.5 Detected  | 27399.2 Detected  | 21753.9 Detected  | Tmx2          | 0.946010941 | 1.19150787 | 1.14859949 | 1.4466697 |
| A_55_P2035 | 9968.9 Detected   | 8071 Detected     | 9002.9 Detected   | 9430.1 Detected   | Trpm7         | 0.94595191  | 0.90309864 | 1.16839301 | 1.1154628 |
| A_55_P2166 | 259 Detected      | 218 Detected      | 250.9 Detected    | 245 Detected      | 9930021J03Rik | 0.945945946 | 0.96872587 | 1.12385321 | 1.1509174 |
| A_55_P2074 | 4137.7 Detected   | 11204 Detected    | 3320.3 Detected   | 3913.6 Detected   | Padi2         | 0.945839476 | 0.80245064 | 0.34930382 | 0.2963495 |
| A_52_P2849 | 138.2 Detected    | 89.8 Detected     | 180 Detected      | 130.7 Detected    | Cacfd1        | 0.945730825 | 1.3024602  | 1.45545657 | 2.0044543 |

|            |          |            |          |            |          |            |          |            |          |             |            |            |           |
|------------|----------|------------|----------|------------|----------|------------|----------|------------|----------|-------------|------------|------------|-----------|
| A_55_P1954 | 387351   | Detected   | 343977.4 | Detected   | 440991.4 | Detected   | 366308.2 | Detected   | Rpl12    | 0.945675111 | 1.13848009 | 1.06491938 | 1.282036  |
| A_66_P1109 | 1538.7   | Detected   | 1183.1   | Detected   | 1773.3   | Detected   | 1455.1   | Detected   | Tpd52l2  | 0.945668421 | 1.15246637 | 1.22990449 | 1.4988589 |
| A_51_P3141 | 6434.1   | Detected   | 5451.4   | Detected   | 5562.2   | Detected   | 6084.1   | Detected   | Psip1    | 0.945602338 | 0.86448765 | 1.11606193 | 1.0203251 |
| A_52_P6421 | 1363.4   | Detected   | 1365.5   | Detected   | 810      | Detected   | 1289.2   | Detected   | Soat1    | 0.945577233 | 0.59410298 | 0.94412303 | 0.5931893 |
| A_55_P2025 | 205854.3 | Detected   | 200962.9 | Detected   | 211661.7 | Detected   | 194638.9 | Detected   | Rpl3     | 0.945517776 | 1.02821122 | 0.96853151 | 1.0532377 |
| A_52_P2297 | 15652.3  | Detected   | 15006.6  | Detected   | 15371.2  | Detected   | 14799.3  | Detected   | Ube2d3   | 0.945503217 | 0.98204098 | 0.98618608 | 1.024296  |
| A_55_P2001 | 412.5    | Detected   | 273.2    | Detected   | 425.1    | Detected   | 390      | Detected   | Zfp128   | 0.945454545 | 1.03054545 | 1.42752562 | 1.5560029 |
| A_66_P1347 | 9901.6   | Detected   | 10836.2  | Detected   | 10722.5  | Detected   | 9361.2   | Detected   | Clpp     | 0.945422962 | 1.08290579 | 0.86388217 | 0.9895074 |
| A_52_P2942 | 1532.2   | Detected   | 1503.8   | Detected   | 1361.6   | Detected   | 1448.5   | Detected   | Zfp41    | 0.945372667 | 0.88865683 | 0.96322649 | 0.9054396 |
| A_55_P2033 | 110403.8 | Detected   | 112405.8 | Detected   | 113728.1 | Detected   | 104372.3 | Detected   | Psmc1    | 0.945368728 | 1.03011038 | 0.92853127 | 1.0117636 |
| A_55_P2073 | 5818.2   | Detected   | 4518.5   | Detected   | 4899.3   | Detected   | 5500.3   | Detected   | Hps4     | 0.945361108 | 0.84206456 | 1.2172845  | 1.0842758 |
| A_51_P1318 | 8185.7   | Detected   | 6663.5   | Detected   | 6541.9   | Detected   | 7738.2   | Detected   | Cyba     | 0.945331493 | 0.79918639 | 1.16128161 | 0.9817513 |
| A_52_P3048 | 8887.1   | Detected   | 7398.8   | Detected   | 5854.8   | Detected   | 8401.2   | Detected   | Gnb1     | 0.945325247 | 0.65879758 | 1.13548143 | 0.7913175 |
| A_52_P6092 | 30419.1  | Detected   | 21584.5  | Detected   | 24544.6  | Detected   | 28755.4  | Detected   | Serinc3  | 0.945307389 | 0.8068812  | 1.33222451 | 1.1371401 |
| A_55_P1985 | 71.1     | Detected   | 58.9     | Detected   | 87.2     | Detected   | 67.2     | Detected   | Lrp1     | 0.945147679 | 1.22644163 | 1.14091681 | 1.4804754 |
| A_55_P2039 | 18283.1  | Detected   | 12551.6  | Detected   | 20068.7  | Detected   | 17278.7  | Detected   | Rbck1    | 0.945064021 | 1.09766396 | 1.37661334 | 1.5988958 |
| A_55_P2088 | 1023     | Detected   | 1031.4   | Detected   | 1034.7   | Detected   | 966.8    | Detected   | Mtss1    | 0.945063539 | 1.01143695 | 0.93736669 | 1.0031995 |
| A_55_P2075 | 9.1      | Not Detect | 15.2     | Detected   | 11.9     | Not Detect | 8.6      | Not Detect | Ibsp     | 0.945054945 | 1.30769231 | 0.56578947 | 0.7828947 |
| A_51_P2098 | 2318.6   | Detected   | 1760.5   | Detected   | 2933.9   | Detected   | 2191.2   | Detected   | Ccnyl1   | 0.945053049 | 1.26537566 | 1.24464641 | 1.6665152 |
| A_51_P2704 | 259.9    | Detected   | 214.2    | Detected   | 168.5    | Detected   | 245.6    | Detected   | Ficd     | 0.944978838 | 0.64832628 | 1.14659197 | 0.786648  |
| A_66_P1344 | 3142.4   | Detected   | 3501.5   | Detected   | 3060.2   | Detected   | 2969.5   | Detected   | Skp2     | 0.94497836  | 0.97384165 | 0.84806511 | 0.8739683 |
| A_55_P1990 | 1262.6   | Detected   | 1038     | Detected   | 1819.7   | Detected   | 1193.1   | Detected   | Zranb3   | 0.944954855 | 1.44123238 | 1.14942197 | 1.7530829 |
| A_51_P3246 | 817.3    | Detected   | 680.1    | Detected   | 138      | Detected   | 772.3    | Detected   | Lphn1    | 0.944940658 | 0.16884865 | 1.1355683  | 0.2029113 |
| A_51_P2245 | 7468.6   | Detected   | 5165.4   | Detected   | 5202.5   | Detected   | 7057.2   | Detected   | Arl8a    | 0.944916049 | 0.69658303 | 1.36624463 | 1.0071824 |
| A_51_P4019 | 128771.6 | Detected   | 99511.9  | Detected   | 127320   | Detected   | 121677.8 | Detected   | Taldo1   | 0.944911766 | 0.98872733 | 1.22274622 | 1.279445  |
| A_55_P2062 | 3977.4   | Detected   | 4524.2   | Detected   | 2866.1   | Detected   | 3758.1   | Detected   | Aspscr1  | 0.944863479 | 0.72059637 | 0.8306662  | 0.6335043 |
| A_66_P1145 | 146.9    | Detected   | 117.2    | Detected   | 140.7    | Detected   | 138.8    | Detected   | Ighv10-3 | 0.944860449 | 0.95779442 | 1.18430034 | 1.2005119 |
| A_65_P1130 | 1484.6   | Detected   | 1020     | Detected   | 1214.9   | Detected   | 1402.7   | Detected   | Gm4944   | 0.944833625 | 0.81833491 | 1.37519608 | 1.1910784 |
| A_51_P2881 | 30677    | Detected   | 35727    | Detected   | 30608.7  | Detected   | 28981.1  | Detected   | Psmc6    | 0.944717541 | 0.99777358 | 0.81118202 | 0.8567386 |
| A_52_P1592 | 1602     | Detected   | 863.1    | Detected   | 1163.8   | Detected   | 1513.4   | Detected   | Lpp      | 0.944694132 | 0.72646692 | 1.75344688 | 1.3483953 |
| A_55_P2134 | 6517.3   | Detected   | 5039.1   | Detected   | 7574.1   | Detected   | 6156.8   | Detected   | Mzt2     | 0.944685683 | 1.16215304 | 1.22180548 | 1.503066  |
| A_52_P2299 | 1255.7   | Detected   | 1276.7   | Detected   | 1144.4   | Detected   | 1186.2   | Detected   | Cbx8     | 0.944652385 | 0.91136418 | 0.92911412 | 0.8963735 |
| A_55_P2128 | 619.1    | Detected   | 769.8    | Detected   | 568.3    | Detected   | 584.8    | Detected   | Rnf217   | 0.944596996 | 0.9179454  | 0.75967784 | 0.7382437 |
| A_55_P2109 | 2753.7   | Detected   | 2619.2   | Detected   | 3019.8   | Detected   | 2601.1   | Detected   | Mpg      | 0.944583651 | 1.09663362 | 0.99308949 | 1.1529475 |
| A_52_P6734 | 3033.9   | Detected   | 3443.5   | Detected   | 3397.9   | Detected   | 2865.7   | Detected   | Shmt1    | 0.944559808 | 1.11997759 | 0.8322056  | 0.9867577 |
| A_55_P2090 | 299.4    | Detected   | 418      | Detected   | 259.5    | Detected   | 282.8    | Detected   | Gm4340   | 0.944555778 | 0.86673347 | 0.67655502 | 0.6208134 |
| A_55_P2005 | 113.6    | Detected   | 116.6    | Detected   | 105.3    | Detected   | 107.3    | Detected   | Olfv576  | 0.944542254 | 0.92693662 | 0.92024014 | 0.9030875 |
| A_55_P2167 | 10.8     | Not Detect | 7.1      | Not Detect | 18.8     | Detected   | 10.2     | Not Detect | Rslcan18 | 0.944444444 | 1.74074074 | 1.43661972 | 2.6478873 |
| A_51_P1518 | 4401.3   | Detected   | 4361.9   | Detected   | 3787.8   | Detected   | 4156.5   | Detected   | Tmtc3    | 0.94438007  | 0.86060937 | 0.95291043 | 0.868383  |
| A_51_P3383 | 7894     | Detected   | 5229.2   | Detected   | 6856.5   | Detected   | 7454.5   | Detected   | Kctd10   | 0.944324804 | 0.86857107 | 1.42555267 | 1.3111948 |

|            |          |          |          |          |          |          |          |            |               |             |            |            |           |
|------------|----------|----------|----------|----------|----------|----------|----------|------------|---------------|-------------|------------|------------|-----------|
| A_52_P2695 | 6320.8   | Detected | 7127.1   | Detected | 5838.4   | Detected | 5968.5   | Detected   | Ergic2        | 0.944263384 | 0.92368055 | 0.83743739 | 0.8191831 |
| A_55_P2002 | 43       | Detected | 45.4     | Detected | 40.1     | Detected | 40.6     | Not Detect | Rabgap11      | 0.944186047 | 0.93255814 | 0.89427313 | 0.8832599 |
| A_66_P1362 | 290.1    | Detected | 271.1    | Detected | 287.7    | Detected | 273.9    | Detected   | Rbm4b         | 0.944157187 | 0.99172699 | 1.01032829 | 1.061232  |
| A_55_P2121 | 123.4    | Detected | 115.5    | Detected | 147.2    | Detected | 116.5    | Detected   | Clcc1         | 0.944084279 | 1.19286872 | 1.00865801 | 1.2744589 |
| A_55_P2382 | 26.8     | Detected | 28       | Detected | 24.3     | Detected | 25.3     | Not Detect | AI845619      | 0.944029851 | 0.90671642 | 0.90357143 | 0.8678571 |
| A_55_P2185 | 1691.5   | Detected | 933.9    | Detected | 1170.8   | Detected | 1596.8   | Detected   | Zfp865        | 0.944014189 | 0.69216672 | 1.70981904 | 1.2536674 |
| A_55_P2066 | 50       | Detected | 61       | Detected | 38.2     | Detected | 47.2     | Detected   | Zufsp         | 0.944       | 0.764      | 0.77377049 | 0.6262295 |
| A_51_P1364 | 13185.5  | Detected | 12702    | Detected | 15269.6  | Detected | 12446.1  | Detected   | Zmat2         | 0.943923249 | 1.15805999 | 0.97985357 | 1.2021414 |
| A_55_P1972 | 516.9    | Detected | 465.9    | Detected | 452.8    | Detected | 487.9    | Detected   | Slc12a6       | 0.943896305 | 0.87599149 | 1.04722043 | 0.9718824 |
| A_51_P2772 | 4777     | Detected | 4154.4   | Detected | 6087.8   | Detected | 4508.9   | Detected   | Apmap         | 0.94387691  | 1.27439816 | 1.08533122 | 1.4653861 |
| A_55_P1992 | 176846.1 | Detected | 172881.5 | Detected | 163995.4 | Detected | 166906.3 | Detected   | Ubtf          | 0.943794067 | 0.92733399 | 0.9654376  | 0.9486001 |
| A_51_P3912 | 2469.2   | Detected | 1964.6   | Detected | 1542.3   | Detected | 2330.4   | Detected   | Gdi1          | 0.943787462 | 0.62461526 | 1.18619566 | 0.7850453 |
| A_55_P2148 | 108.5    | Detected | 131.3    | Detected | 75.1     | Detected | 102.4    | Detected   | Agtppb1       | 0.943778802 | 0.6921659  | 0.77989337 | 0.5719726 |
| A_51_P2823 | 26961.4  | Detected | 28257.7  | Detected | 32865.3  | Detected | 25445.3  | Detected   | Mrps28        | 0.943767757 | 1.21897602 | 0.90047315 | 1.1630564 |
| A_55_P2287 | 384      | Detected | 322.8    | Detected | 450.6    | Detected | 362.4    | Detected   | A930037O16Rik | 0.94375     | 1.1734375  | 1.12267658 | 1.3959108 |
| A_55_P2338 | 2505.9   | Detected | 2413     | Detected | 2589.4   | Detected | 2364.9   | Detected   | Slc35a1       | 0.943732791 | 1.03332136 | 0.98006631 | 1.073104  |
| A_66_P1256 | 650.1    | Detected | 408      | Detected | 558.2    | Detected | 613.5    | Detected   | Nde1          | 0.943700969 | 0.85863713 | 1.50367647 | 1.3681373 |
| A_52_P3097 | 1161.4   | Detected | 962.4    | Detected | 920.3    | Detected | 1096     | Detected   | Cdk12         | 0.943688652 | 0.79240572 | 1.13881962 | 0.9562552 |
| A_55_P1975 | 3221.7   | Detected | 2944.2   | Detected | 2437     | Detected | 3039.6   | Detected   | Fubp3         | 0.943477046 | 0.75643294 | 1.03240269 | 0.8277291 |
| A_55_P1980 | 15222.6  | Detected | 10282.1  | Detected | 15914.1  | Detected | 14362    | Detected   | 1110012L19Rik | 0.943465637 | 1.04542588 | 1.39679637 | 1.547748  |
| A_51_P3472 | 2769.6   | Detected | 2823.3   | Detected | 2179.6   | Detected | 2612.9   | Detected   | Lrr1          | 0.943421433 | 0.78697285 | 0.92547728 | 0.7720044 |
| A_55_P2123 | 2478.5   | Detected | 2365.6   | Detected | 2007.6   | Detected | 2338.2   | Detected   | Akirin1       | 0.943393181 | 0.81000605 | 0.98841731 | 0.8486642 |
| A_51_P3918 | 130.7    | Detected | 144.5    | Detected | 129.7    | Detected | 123.3    | Detected   | Dkk11         | 0.94338179  | 0.99234889 | 0.8532872  | 0.8975779 |
| A_55_P2045 | 110551.4 | Detected | 123025.7 | Detected | 117511.9 | Detected | 104290.6 | Detected   | Eif5a         | 0.94336752  | 1.06296166 | 0.84771393 | 0.9551817 |
| A_55_P2240 | 113      | Detected | 87.6     | Detected | 78.1     | Detected | 106.6    | Detected   | Gm20555       | 0.943362832 | 0.69115044 | 1.21689498 | 0.8915525 |
| A_52_P3436 | 8271.5   | Detected | 8098.2   | Detected | 8419.6   | Detected | 7802.9   | Detected   | Kpna4         | 0.943347639 | 1.01790485 | 0.96353511 | 1.0396878 |
| A_55_P1960 | 13197.7  | Detected | 11347.9  | Detected | 13906.7  | Detected | 12448.8  | Detected   | Wac           | 0.943255264 | 1.05372148 | 1.09701354 | 1.2254867 |
| A_52_P6334 | 42224.5  | Detected | 41116.8  | Detected | 49349.9  | Detected | 39827.6  | Detected   | Gabarapl1     | 0.943234378 | 1.16875037 | 0.96864542 | 1.2002369 |
| A_55_P1980 | 357.6    | Detected | 390.3    | Detected | 377.6    | Detected | 337.3    | Detected   | Il17d         | 0.943232662 | 1.05592841 | 0.86420702 | 0.9674609 |
| A_52_P1538 | 927.3    | Detected | 837.2    | Detected | 900.3    | Detected | 874.6    | Detected   | Prpf4b        | 0.943168338 | 0.97088321 | 1.04467272 | 1.0753703 |
| A_52_P121  | 2342.2   | Detected | 2199.6   | Detected | 2606.8   | Detected | 2209     | Detected   | Osgepl1       | 0.94313039  | 1.11297071 | 1.0042735  | 1.1851246 |
| A_52_P2176 | 3284.3   | Detected | 3114.6   | Detected | 2501.8   | Detected | 3097.4   | Detected   | Snopc3        | 0.943092897 | 0.76174527 | 0.99447762 | 0.8032492 |
| A_55_P2037 | 2286     | Detected | 2012.2   | Detected | 1565.6   | Detected | 2155.9   | Detected   | Depdc1a       | 0.943088364 | 0.68486439 | 1.07141437 | 0.7780539 |
| A_51_P1532 | 11049.2  | Detected | 8353     | Detected | 10637.3  | Detected | 10420.3  | Detected   | Zdhhc12       | 0.943081852 | 0.96272128 | 1.24749192 | 1.2734706 |
| A_55_P2030 | 2533.3   | Detected | 2153.5   | Detected | 2776.2   | Detected | 2389     | Detected   | Cir1          | 0.943038724 | 1.09588284 | 1.10935686 | 1.2891572 |
| A_51_P3576 | 10028.7  | Detected | 8323.9   | Detected | 9233.5   | Detected | 9457.2   | Detected   | Dhx16         | 0.943013551 | 0.92070757 | 1.13615012 | 1.1092757 |
| A_52_P5195 | 1154.6   | Detected | 944      | Detected | 861.6    | Detected | 1088.8   | Detected   | Uba6          | 0.943010566 | 0.74623246 | 1.15338983 | 0.9127119 |
| A_55_P1993 | 158055.8 | Detected | 169611   | Detected | 182429.1 | Detected | 149041.9 | Detected   | Rps24         | 0.942970141 | 1.15420693 | 0.87872779 | 1.0755735 |
| A_55_P2131 | 57256.9  | Detected | 56290.1  | Detected | 54194.1  | Detected | 53988.6  | Detected   | Poldip3       | 0.94291867  | 0.94650776 | 0.95911359 | 0.9627643 |
| A_55_P2023 | 3626.2   | Detected | 2959.4   | Detected | 4208.5   | Detected | 3419.2   | Detected   | Tmx2          | 0.942915449 | 1.16058132 | 1.15536933 | 1.4220788 |

|            |          |          |          |          |          |            |          |            |               |             |            |            |           |
|------------|----------|----------|----------|----------|----------|------------|----------|------------|---------------|-------------|------------|------------|-----------|
| A_52_P4766 | 2726     | Detected | 3653     | Detected | 2682.1   | Detected   | 2570.3   | Detected   | Gemin4        | 0.942883346 | 0.98389582 | 0.70361347 | 0.7342185 |
| A_55_P2128 | 176.8    | Detected | 187.3    | Detected | 154.3    | Detected   | 166.7    | Detected   | Adam17        | 0.942873303 | 0.87273756 | 0.89001602 | 0.8238121 |
| A_55_P2156 | 73.5     | Detected | 46.5     | Detected | 54.6     | Detected   | 69.3     | Detected   | Ccdc136       | 0.942857143 | 0.74285714 | 1.49032258 | 1.1741935 |
| A_55_P2111 | 425.2    | Detected | 389.2    | Detected | 452.3    | Detected   | 400.9    | Detected   | Mbd1          | 0.942850423 | 1.06373471 | 1.03006166 | 1.1621274 |
| A_55_P1979 | 7544.9   | Detected | 6055.8   | Detected | 9601.3   | Detected   | 7113.7   | Detected   | Gle1          | 0.942848812 | 1.27255497 | 1.17469203 | 1.5854718 |
| A_51_P2013 | 3313     | Detected | 3216.4   | Detected | 3399     | Detected   | 3123.5   | Detected   | Mtss1         | 0.942801087 | 1.02595835 | 0.97111678 | 1.0567715 |
| A_55_P1962 | 984.2    | Detected | 890.2    | Detected | 809.6    | Detected   | 927.9    | Detected   | Snapc3        | 0.94279618  | 0.82259703 | 1.04235003 | 0.9094585 |
| A_55_P2143 | 1852.6   | Detected | 2677.8   | Detected | 3115.6   | Detected   | 1746.6   | Detected   | Pdxk          | 0.942783116 | 1.68174458 | 0.65225185 | 1.1634924 |
| A_55_P1964 | 22.7     | Detected | 32.3     | Detected | 15.8     | Detected   | 21.4     | Not Detect | Krt28         | 0.942731278 | 0.69603524 | 0.6625387  | 0.4891641 |
| A_66_P1155 | 5410.7   | Detected | 4019.1   | Detected | 5060.1   | Detected   | 5100.7   | Detected   | Crebzf        | 0.942706119 | 0.93520247 | 1.26911498 | 1.2590132 |
| A_55_P2090 | 4065.4   | Detected | 4324.7   | Detected | 4931.8   | Detected   | 3832.4   | Detected   | Cbx5          | 0.942687066 | 1.21311556 | 0.88616551 | 1.1403797 |
| A_55_P2148 | 1462.2   | Detected | 1258.8   | Detected | 1325.7   | Detected   | 1378.3   | Detected   | Pithd1        | 0.942620709 | 0.90664752 | 1.09493168 | 1.0531459 |
| A_55_P2115 | 2067.2   | Detected | 1458.5   | Detected | 2109.9   | Detected   | 1948.5   | Detected   | Gm14325       | 0.942579334 | 1.02065596 | 1.3359616  | 1.4466232 |
| A_55_P1999 | 10541.4  | Detected | 8264.6   | Detected | 10029.8  | Detected   | 9935.4   | Detected   | Ovol2         | 0.94251238  | 0.95146755 | 1.20216344 | 1.2135857 |
| A_55_P2119 | 488.8    | Detected | 345.2    | Detected | 395.8    | Detected   | 460.7    | Detected   | Cspp1         | 0.942512275 | 0.80973813 | 1.33458864 | 1.1465817 |
| A_55_P2013 | 76.5     | Detected | 44.4     | Detected | 160.1    | Detected   | 72.1     | Detected   | Ablim1        | 0.94248366  | 2.09281046 | 1.62387387 | 3.6058559 |
| A_51_P1838 | 57448.7  | Detected | 48714.3  | Detected | 59868    | Detected   | 54140.6  | Detected   | Polr2m        | 0.942416452 | 1.04211235 | 1.11139029 | 1.2289615 |
| A_55_P1961 | 866.3    | Detected | 799.9    | Detected | 682.4    | Detected   | 816.4    | Detected   | Cd68          | 0.942398707 | 0.78771788 | 1.02062758 | 0.8531066 |
| A_52_P4431 | 14375.2  | Detected | 12344.1  | Detected | 12370.5  | Detected   | 13546.2  | Detected   | Naa35         | 0.942331237 | 0.86054455 | 1.09738256 | 1.0021387 |
| A_55_P2244 | 20.8     | Detected | 22.6     | Detected | 18.7     | Not Detect | 19.6     | Not Detect | 2410024N13Rik | 0.942307692 | 0.89903846 | 0.86725664 | 0.8274336 |
| A_55_P1954 | 6442.1   | Detected | 4499.5   | Detected | 4057.2   | Detected   | 6070.3   | Detected   | Gm15800       | 0.942285901 | 0.62979463 | 1.34910546 | 0.9017002 |
| A_55_P2138 | 4740.6   | Detected | 4233.1   | Detected | 4713.3   | Detected   | 4467     | Detected   | Pias2         | 0.942285787 | 0.99424124 | 1.05525501 | 1.1134393 |
| A_52_P6454 | 211.3    | Detected | 199.7    | Detected | 227.6    | Detected   | 199.1    | Detected   | Apobec3       | 0.942262186 | 1.0771415  | 0.99699549 | 1.1397096 |
| A_52_P4862 | 14898.2  | Detected | 15342.4  | Detected | 14707.6  | Detected   | 14036.2  | Detected   | Polr2b        | 0.942140661 | 0.98720651 | 0.91486339 | 0.9586245 |
| A_52_P9655 | 4400.7   | Detected | 3092     | Detected | 4673.1   | Detected   | 4145.5   | Detected   | Vkorc11i      | 0.942009226 | 1.06189924 | 1.34071798 | 1.5113519 |
| A_55_P2040 | 69205    | Detected | 53406.6  | Detected | 84272.6  | Detected   | 65190.4  | Detected   | Swi5          | 0.941989741 | 1.21772415 | 1.22064314 | 1.5779436 |
| A_51_P4235 | 549.8    | Detected | 410.8    | Detected | 436.1    | Detected   | 517.9    | Detected   | 2310003H01Rik | 0.941978901 | 0.79319753 | 1.26071081 | 1.0615871 |
| A_55_P2055 | 12839.3  | Detected | 10816.7  | Detected | 11336.8  | Detected   | 12094.2  | Detected   | Mcts1         | 0.941967241 | 0.88297649 | 1.11810441 | 1.0480831 |
| A_51_P4296 | 101438.2 | Detected | 79764.1  | Detected | 106776.1 | Detected   | 95549    | Detected   | Ebp           | 0.941942976 | 1.05262219 | 1.19789479 | 1.3386486 |
| A_66_P1339 | 25421.3  | Detected | 25519.9  | Detected | 24844.9  | Detected   | 23940.9  | Detected   | Gm5093        | 0.94176537  | 0.9773261  | 0.93812672 | 0.9735501 |
| A_55_P2086 | 11338.9  | Detected | 8654.4   | Detected | 8015.5   | Detected   | 10677.3  | Detected   | Dennd5a       | 0.941652188 | 0.70690279 | 1.23374237 | 0.9261763 |
| A_55_P2033 | 43145.5  | Detected | 49608.9  | Detected | 44140    | Detected   | 40625.8  | Detected   | Mrpl22        | 0.941599935 | 1.02304991 | 0.8189216  | 0.8897597 |
| A_55_P2253 | 46.2     | Detected | 37.3     | Detected | 31.9     | Detected   | 43.5     | Not Detect | 4930567H12Rik | 0.941558442 | 0.69047619 | 1.16621984 | 0.8552279 |
| A_55_P1966 | 126.6    | Detected | 136.5    | Detected | 192.3    | Detected   | 119.2    | Detected   | Sntb1         | 0.941548183 | 1.51895735 | 0.87326007 | 1.4087912 |
| A_55_P2329 | 17.1     | Detected | 16.3     | Detected | 15.8     | Not Detect | 16.1     | Not Detect | Ccdc148       | 0.941520468 | 0.92397661 | 0.98773006 | 0.9693252 |
| A_55_P2020 | 27.3     | Detected | 26.6     | Detected | 26.8     | Detected   | 25.7     | Not Detect | Pla2g2f       | 0.941391941 | 0.98168498 | 0.96616541 | 1.0075188 |
| A_55_P2058 | 15230.7  | Detected | 16133.1  | Detected | 16294    | Detected   | 14337.5  | Detected   | Wbscr22       | 0.941355289 | 1.06981294 | 0.88870087 | 1.0099733 |
| A_55_P2092 | 144130.1 | Detected | 135790.9 | Detected | 124681.4 | Detected   | 135670.3 | Detected   | Phgdh         | 0.941304419 | 0.8650615  | 0.99911187 | 0.9181867 |
| A_55_P1997 | 15.3     | Detected | 20.7     | Detected | 16       | Not Detect | 14.4     | Not Detect | Ggnbp1        | 0.941176471 | 1.04575163 | 0.69565217 | 0.7729469 |
| A_55_P2032 | 318089.2 | Detected | 306384   | Detected | 327875.8 | Detected   | 299361.7 | Detected   | Rps24         | 0.941125005 | 1.03076684 | 0.97708007 | 1.0701466 |

|            |          |            |          |            |          |            |          |            |               |             |            |            |           |
|------------|----------|------------|----------|------------|----------|------------|----------|------------|---------------|-------------|------------|------------|-----------|
| A_51_P2172 | 6364.8   | Detected   | 7306.6   | Detected   | 6158.2   | Detected   | 5989.8   | Detected   | Derl1         | 0.941082202 | 0.96754022 | 0.81977938 | 0.842827  |
| A_51_P3988 | 60404.2  | Detected   | 60355.3  | Detected   | 67066.6  | Detected   | 56842.6  | Detected   | Uck2          | 0.941037213 | 1.11029697 | 0.94179964 | 1.1111965 |
| A_55_P2066 | 86691.9  | Detected   | 76478.9  | Detected   | 78673.8  | Detected   | 81579.2  | Detected   | Akt1          | 0.941024479 | 0.90751039 | 1.06668898 | 1.0286994 |
| A_51_P3375 | 2763.9   | Detected   | 2523.7   | Detected   | 2837.5   | Detected   | 2600.8   | Detected   | Glce          | 0.940989182 | 1.02662904 | 1.03055038 | 1.1243412 |
| A_51_P4927 | 15349.3  | Detected   | 18391.7  | Detected   | 15502    | Detected   | 14443.3  | Detected   | Wdr75         | 0.940974507 | 1.00994834 | 0.7853162  | 0.8428802 |
| A_55_P1958 | 235964.7 | Detected   | 235737   | Detected   | 266248.4 | Detected   | 222036.5 | Detected   | Rps29         | 0.940973374 | 1.12833996 | 0.94188227 | 1.1294298 |
| A_51_P1897 | 4589.8   | Detected   | 6399.7   | Detected   | 4701.9   | Detected   | 4318.8   | Detected   | Pim3          | 0.940956033 | 1.02442372 | 0.67484413 | 0.7347063 |
| A_52_P2261 | 1747.2   | Detected   | 1670.2   | Detected   | 1870.9   | Detected   | 1644     | Detected   | Gm4862        | 0.940934066 | 1.07079899 | 0.98431326 | 1.1201652 |
| A_55_P1957 | 16.9     | Detected   | 13.2     | Not Detect | 14.1     | Not Detect | 15.9     | Not Detect | Cypt4         | 0.940828402 | 0.83431953 | 1.20454545 | 1.0681818 |
| A_52_P4297 | 1230.3   | Detected   | 1295     | Detected   | 979.2    | Detected   | 1157.5   | Detected   | Cnst          | 0.94082744  | 0.79590344 | 0.89382239 | 0.756139  |
| A_51_P4151 | 234.9    | Detected   | 170.5    | Detected   | 258.7    | Detected   | 221      | Detected   | Tgfa          | 0.940825883 | 1.10131971 | 1.29618768 | 1.5173021 |
| A_55_P2069 | 5818.2   | Detected   | 5838.1   | Detected   | 4931.8   | Detected   | 5473.8   | Detected   | Ptpn13        | 0.940806435 | 0.84765048 | 0.93759956 | 0.8447611 |
| A_55_P2038 | 43858.6  | Detected   | 31795.8  | Detected   | 45525.5  | Detected   | 41261.9  | Detected   | Nt5c          | 0.940793824 | 1.03800623 | 1.29771542 | 1.4318086 |
| A_55_P1956 | 113498.4 | Detected   | 95664.1  | Detected   | 114164.1 | Detected   | 106777.4 | Detected   | Rpl36a        | 0.940783306 | 1.00586528 | 1.11617002 | 1.193385  |
| A_55_P2067 | 495.7    | Detected   | 240      | Detected   | 515.3    | Detected   | 466.3    | Detected   | Dclre1c       | 0.940689933 | 1.03954004 | 1.94291667 | 2.1470833 |
| A_55_P2129 | 3337.8   | Detected   | 3547.7   | Detected   | 2673.7   | Detected   | 3139.1   | Detected   | Rabgef1       | 0.940469771 | 0.80103661 | 0.88482679 | 0.7536432 |
| A_55_P2154 | 513208.3 | Detected   | 493957.8 | Detected   | 513506.9 | Detected   | 482630.6 | Detected   | Tuba1b        | 0.94041854  | 1.00058183 | 0.97706849 | 1.0395765 |
| A_66_P1225 | 122.5    | Detected   | 161.7    | Detected   | 93       | Detected   | 115.2    | Detected   | Ikzf2         | 0.940408163 | 0.75918367 | 0.71243043 | 0.5751391 |
| A_55_P1952 | 209775.9 | Detected   | 177244.7 | Detected   | 243444.3 | Detected   | 197261.6 | Detected   | Rpl12         | 0.940344434 | 1.16049699 | 1.1129337  | 1.3734927 |
| A_55_P2172 | 5179.6   | Detected   | 4954.2   | Detected   | 4253.1   | Detected   | 4870.1   | Detected   | Ptpn13        | 0.940246351 | 0.82112518 | 0.9830245  | 0.8584837 |
| A_55_P2052 | 11.7     | Not Detect | 51.5     | Detected   | 8.4      | Not Detect | 11       | Not Detect | Gbp6          | 0.94017094  | 0.71794872 | 0.21359223 | 0.1631068 |
| A_55_P2348 | 140.2    | Detected   | 298.3    | Detected   | 137.9    | Detected   | 131.8    | Detected   | Casd1         | 0.940085592 | 0.98359486 | 0.44183708 | 0.4622863 |
| A_55_P2196 | 130.1    | Detected   | 148.1    | Detected   | 140.6    | Detected   | 122.3    | Detected   | A630031M23Rik | 0.940046118 | 1.08070715 | 0.82579338 | 0.9493585 |
| A_51_P4593 | 12942.4  | Detected   | 12354.2  | Detected   | 12313    | Detected   | 12165.9  | Detected   | Appbp2        | 0.9400034   | 0.95136914 | 0.98475822 | 0.9966651 |
| A_55_P2029 | 65       | Detected   | 45.5     | Detected   | 50.7     | Detected   | 61.1     | Detected   | Soga1         | 0.94        | 0.78       | 1.34285714 | 1.1142857 |
| A_66_P1322 | 40012.5  | Detected   | 17841.5  | Detected   | 52552.5  | Detected   | 37611.7  | Detected   | Akr1c13       | 0.93999875  | 1.31340206 | 2.1081019  | 2.9455203 |
| A_55_P1963 | 86.6     | Detected   | 50.2     | Detected   | 78.2     | Detected   | 81.4     | Detected   | Gm4861        | 0.939953811 | 0.90300231 | 1.62151394 | 1.5577689 |
| A_66_P1252 | 993.3    | Detected   | 892.4    | Detected   | 929.3    | Detected   | 933.6    | Detected   | Cep120        | 0.939897312 | 0.93556831 | 1.04616764 | 1.0413492 |
| A_55_P1962 | 74664.5  | Detected   | 68542.9  | Detected   | 68241.1  | Detected   | 70176.9  | Detected   | Anp32b        | 0.93989647  | 0.91396983 | 1.02383908 | 0.9955969 |
| A_55_P1975 | 42367.3  | Detected   | 40847.5  | Detected   | 46809.1  | Detected   | 39818.7  | Detected   | Ufc1          | 0.939845116 | 1.10484029 | 0.97481364 | 1.1459477 |
| A_55_P2034 | 6512.2   | Detected   | 6993.3   | Detected   | 4788.1   | Detected   | 6120.4   | Detected   | Ccdc104       | 0.939836    | 0.73525076 | 0.87518053 | 0.6846696 |
| A_55_P2396 | 81.4     | Detected   | 74.5     | Detected   | 70       | Detected   | 76.5     | Detected   | A730056I06Rik | 0.93980344  | 0.85995086 | 1.02684564 | 0.9395973 |
| A_55_P1982 | 275414.2 | Detected   | 248413.9 | Detected   | 269452.1 | Detected   | 258816.7 | Detected   | Rpl31         | 0.939736223 | 0.97835224 | 1.04187688 | 1.0846901 |
| A_52_P6224 | 6334.2   | Detected   | 5875.5   | Detected   | 4593     | Detected   | 5952.3   | Detected   | Pdcl3         | 0.93970825  | 0.7251113  | 1.01307123 | 0.7817207 |
| A_55_P2167 | 6108.7   | Detected   | 4536.9   | Detected   | 4440.5   | Detected   | 5740.1   | Detected   | Arid1a        | 0.939659829 | 0.72691407 | 1.26520311 | 0.978752  |
| A_55_P2370 | 946      | Detected   | 930.1    | Detected   | 893.1    | Detected   | 888.9    | Detected   | Ppp2r5e       | 0.939640592 | 0.94408034 | 0.95570369 | 0.9602193 |
| A_55_P2147 | 8158.4   | Detected   | 6145.4   | Detected   | 8488.4   | Detected   | 7665.5   | Detected   | Spata2        | 0.939583742 | 1.04044911 | 1.24735575 | 1.3812608 |
| A_52_P2795 | 5149.5   | Detected   | 5217.8   | Detected   | 5321.6   | Detected   | 4837.7   | Detected   | Ube2k         | 0.939450432 | 1.03342072 | 0.92715321 | 1.0198934 |
| A_51_P2562 | 15402.9  | Detected   | 12141.1  | Detected   | 14300.4  | Detected   | 14470.1  | Detected   | Ppp6c         | 0.939439976 | 0.92842257 | 1.19182776 | 1.1778504 |
| A_55_P2115 | 16927.2  | Detected   | 12883.2  | Detected   | 16127.8  | Detected   | 15901.8  | Detected   | Zfyve19       | 0.939422941 | 0.95277423 | 1.23430514 | 1.2518474 |



|            |          |            |          |            |          |            |          |            |               |             |            |            |           |
|------------|----------|------------|----------|------------|----------|------------|----------|------------|---------------|-------------|------------|------------|-----------|
| A_51_P4990 | 17822.7  | Detected   | 16786.6  | Detected   | 14520.9  | Detected   | 16741.5  | Detected   | Ube2o         | 0.939335791 | 0.81474187 | 0.99731333 | 0.8650292 |
| A_55_P2003 | 47776.1  | Detected   | 47450.3  | Detected   | 43086.8  | Detected   | 44872.6  | Detected   | Capza1        | 0.939226936 | 0.90184841 | 0.94567579 | 0.9080406 |
| A_52_P5773 | 146      | Detected   | 131.8    | Detected   | 104.1    | Detected   | 137.1    | Detected   | Il18bp        | 0.939041096 | 0.7130137  | 1.04021244 | 0.7898331 |
| A_55_P2035 | 85.3     | Detected   | 66       | Detected   | 64.8     | Detected   | 80.1     | Detected   | Strip1        | 0.939038687 | 0.75967175 | 1.21363636 | 0.9818182 |
| A_65_P1534 | 2347     | Detected   | 3051.9   | Detected   | 2371     | Detected   | 2203.9   | Detected   | Zfp251        | 0.939028547 | 1.01022582 | 0.72214031 | 0.7768931 |
| A_55_P2073 | 5675.9   | Detected   | 5647.9   | Detected   | 4741.4   | Detected   | 5329.4   | Detected   | Gtf3c2        | 0.938952413 | 0.83535651 | 0.94360736 | 0.8394979 |
| A_55_P2052 | 122.8    | Detected   | 140.5    | Detected   | 106.2    | Detected   | 115.3    | Detected   | Gbp6          | 0.938925081 | 0.86482085 | 0.82064057 | 0.7558719 |
| A_51_P2562 | 7793.2   | Detected   | 6263.2   | Detected   | 6639.3   | Detected   | 7316.9   | Detected   | Zfp768        | 0.938882616 | 0.85193502 | 1.16823668 | 1.0600492 |
| A_55_P2279 | 32.7     | Detected   | 30.5     | Detected   | 18       | Detected   | 30.7     | Not Detect | AW125646      | 0.93883792  | 0.55045872 | 1.00655738 | 0.5901639 |
| A_55_P1987 | 218.9    | Detected   | 185.4    | Detected   | 189.7    | Detected   | 205.5    | Detected   | Tmem161b      | 0.938784833 | 0.86660576 | 1.10841424 | 1.0231931 |
| A_51_P2602 | 9.8      | Not Detect | 27.8     | Detected   | 3.3      | Not Detect | 9.2      | Not Detect | Cpne4         | 0.93877551  | 0.33673469 | 0.33093525 | 0.118705  |
| A_51_P4038 | 31       | Detected   | 140.2    | Detected   | 37.3     | Detected   | 29.1     | Not Detect | Slc4a5        | 0.938709677 | 1.20322581 | 0.20756063 | 0.2660485 |
| A_55_P2112 | 10463.6  | Detected   | 8012.6   | Detected   | 8843.1   | Detected   | 9822.2   | Detected   | Uxt           | 0.938701785 | 0.84512978 | 1.2258443  | 1.1036493 |
| A_55_P2013 | 11.4     | Not Detect | 32.4     | Detected   | 12.8     | Not Detect | 10.7     | Not Detect | Tsga10        | 0.938596491 | 1.12280702 | 0.33024691 | 0.3950617 |
| A_51_P5072 | 1528.6   | Detected   | 1427.1   | Detected   | 1810     | Detected   | 1434.7   | Detected   | Patl1         | 0.938571242 | 1.18409002 | 1.00532549 | 1.2683064 |
| A_55_P2065 | 3562.9   | Detected   | 3434.4   | Detected   | 3418.9   | Detected   | 3344     | Detected   | Ctdp1         | 0.938561284 | 0.95958349 | 0.97367808 | 0.9954868 |
| A_51_P3939 | 16437.1  | Detected   | 25230.1  | Detected   | 12951.1  | Detected   | 15427.2  | Detected   | Fbxo5         | 0.938559722 | 0.78791879 | 0.61146012 | 0.5133194 |
| A_55_P2019 | 19137.4  | Detected   | 16196.6  | Detected   | 17450.1  | Detected   | 17961.3  | Detected   | Rps6kb1       | 0.938544421 | 0.91183233 | 1.10895497 | 1.0773928 |
| A_55_P2179 | 369      | Detected   | 276.9    | Detected   | 325.1    | Detected   | 346.3    | Detected   | Syngn4        | 0.938482385 | 0.88102981 | 1.250632   | 1.1740701 |
| A_55_P2179 | 2687.1   | Detected   | 2533.1   | Detected   | 2405.2   | Detected   | 2521.7   | Detected   | Ppp1r8        | 0.938446653 | 0.89509136 | 0.99549959 | 0.9495085 |
| A_55_P2107 | 87.7     | Detected   | 72.2     | Detected   | 79.8     | Detected   | 82.3     | Detected   | Rasd2         | 0.938426454 | 0.90992018 | 1.1398892  | 1.1052632 |
| A_51_P2791 | 539      | Detected   | 2277.5   | Detected   | 84.1     | Detected   | 505.8    | Detected   | Plcg2         | 0.938404453 | 0.15602968 | 0.22208562 | 0.0369265 |
| A_52_P5458 | 14062    | Detected   | 12318.4  | Detected   | 11654.9  | Detected   | 13194.7  | Detected   | Lrrfip1       | 0.93832314  | 0.82882236 | 1.07113749 | 0.9461375 |
| A_51_P3481 | 5762.5   | Detected   | 5241.2   | Detected   | 4827.4   | Detected   | 5406.5   | Detected   | Ube2q1        | 0.938221258 | 0.83772668 | 1.03153858 | 0.9210486 |
| A_55_P2246 | 61.5     | Detected   | 43.5     | Detected   | 44.5     | Detected   | 57.7     | Detected   | C130051F05Rik | 0.938211382 | 0.72357724 | 1.32643678 | 1.0229885 |
| A_55_P2022 | 9.7      | Not Detect | 14.5     | Not Detect | 19.7     | Detected   | 9.1      | Not Detect | Oxct2b        | 0.93814433  | 2.03092784 | 0.62758621 | 1.3586207 |
| A_55_P1993 | 168312.9 | Detected   | 173549.5 | Detected   | 188545.8 | Detected   | 157899   | Detected   | Gm6030        | 0.938127737 | 1.12021004 | 0.90982112 | 1.0864094 |
| A_51_P2813 | 8013.1   | Detected   | 7294.3   | Detected   | 4962     | Detected   | 7517.3   | Detected   | Tspan5        | 0.938126318 | 0.619236   | 1.03057182 | 0.6802572 |
| A_55_P2053 | 11688.8  | Detected   | 8315.3   | Detected   | 10316.7  | Detected   | 10965.4  | Detected   | Cacfd1        | 0.938111697 | 0.88261413 | 1.31870167 | 1.2406889 |
| A_51_P2757 | 75.9     | Detected   | 47.4     | Detected   | 100.6    | Detected   | 71.2     | Detected   | D17H6S53E     | 0.938076416 | 1.32542819 | 1.5021097  | 2.1223629 |
| A_52_P3043 | 1743.5   | Detected   | 1173.1   | Detected   | 2019.1   | Detected   | 1635.4   | Detected   | Isca1         | 0.937998279 | 1.15807284 | 1.39408405 | 1.7211661 |
| A_55_P1977 | 198.3    | Detected   | 190.2    | Detected   | 220.8    | Detected   | 186      | Detected   | Dip2b         | 0.937972769 | 1.11346445 | 0.97791798 | 1.1608833 |
| A_55_P2072 | 1358.2   | Detected   | 912.8    | Detected   | 1248.3   | Detected   | 1273.9   | Detected   | Sptan1        | 0.937932558 | 0.91908408 | 1.39559597 | 1.3675504 |
| A_55_P2006 | 5269.1   | Detected   | 6803.9   | Detected   | 3657.5   | Detected   | 4941.4   | Detected   | Map4k5        | 0.937807216 | 0.69414131 | 0.72625994 | 0.5375593 |
| A_55_P2120 | 3427.1   | Detected   | 1969.8   | Detected   | 3147.9   | Detected   | 3213.8   | Detected   | Gm7120        | 0.937760789 | 0.9185317  | 1.6315362  | 1.598081  |
| A_55_P2016 | 293550.7 | Detected   | 285358   | Detected   | 309335.6 | Detected   | 275276.2 | Detected   | Nme2          | 0.937746699 | 1.05377231 | 0.96466964 | 1.0840264 |
| A_55_P2148 | 25.7     | Detected   | 31.9     | Detected   | 35.9     | Detected   | 24.1     | Not Detect | Proser1       | 0.937743191 | 1.39688716 | 0.75548589 | 1.1253918 |
| A_52_P3615 | 50250.3  | Detected   | 38456.6  | Detected   | 54949.1  | Detected   | 47120.5  | Detected   | Hspa14        | 0.937715795 | 1.0935079  | 1.22529033 | 1.4288601 |
| A_55_P2014 | 9704.8   | Detected   | 9583.8   | Detected   | 8241.1   | Detected   | 9100     | Detected   | Knop1         | 0.937680323 | 0.84917773 | 0.94951898 | 0.859899  |
| A_52_P6136 | 543.8    | Detected   | 587.3    | Detected   | 465.5    | Detected   | 509.9    | Detected   | Zfp3          | 0.937660905 | 0.85601324 | 0.86821045 | 0.7926103 |

|            |                   |                   |                   |                   |               |             |            |            |           |
|------------|-------------------|-------------------|-------------------|-------------------|---------------|-------------|------------|------------|-----------|
| A_55_P1967 | 96.2 Detected     | 150.7 Detected    | 74.1 Detected     | 90.2 Detected     | Klc3          | 0.937629938 | 0.77027027 | 0.59854015 | 0.4917054 |
| A_55_P2319 | 11.2 Not Detect   | 22.6 Detected     | 20.9 Detected     | 10.5 Not Detect   | 4930414F18Rik | 0.9375      | 1.86607143 | 0.46460177 | 0.9247788 |
| A_55_P2146 | 256 Detected      | 224.6 Detected    | 149.3 Detected    | 240 Detected      | LOC101056155  | 0.9375      | 0.58320313 | 1.06856634 | 0.6647373 |
| A_52_P4885 | 12.8 Not Detect   | 19.2 Detected     | 3.8 Not Detect    | 12 Not Detect     | Gtsf1l        | 0.9375      | 0.296875   | 0.625      | 0.1979167 |
| A_55_P2302 | 9.6 Not Detect    | 25.6 Detected     | 8 Not Detect      | 9 Not Detect      | Kdm5d         | 0.9375      | 0.83333333 | 0.3515625  | 0.3125    |
| A_55_P2074 | 7198.4 Detected   | 3820.7 Detected   | 8123.5 Detected   | 6748.2 Detected   | Fam168a       | 0.937458324 | 1.12851467 | 1.76622085 | 2.1261811 |
| A_52_P3990 | 2415.7 Detected   | 2082.3 Detected   | 2469.7 Detected   | 2264.6 Detected   | Tmed2         | 0.937450842 | 1.02235377 | 1.08754742 | 1.1860443 |
| A_51_P2331 | 20310.1 Detected  | 20613.6 Detected  | 22192.7 Detected  | 19038.5 Detected  | Ltbp3         | 0.937390756 | 1.0926928  | 0.92358928 | 1.0766048 |
| A_52_P2860 | 376.8 Detected    | 647 Detected      | 88.7 Detected     | 353.2 Detected    | Obsl1         | 0.937367304 | 0.2354034  | 0.54590417 | 0.1370943 |
| A_51_P2143 | 35597.1 Detected  | 37090.3 Detected  | 37600.8 Detected  | 33367.2 Detected  | Haus4         | 0.937357257 | 1.05628829 | 0.89962066 | 1.0137637 |
| A_55_P1976 | 3413.9 Detected   | 3276.2 Detected   | 3314.8 Detected   | 3200 Detected     | Polr3e        | 0.937344386 | 0.97097162 | 0.97674135 | 1.0117819 |
| A_55_P2031 | 15752.8 Detected  | 12444.4 Detected  | 16696 Detected    | 14765.1 Detected  | Vps52         | 0.937300036 | 1.05987507 | 1.18648549 | 1.3416476 |
| A_55_P1969 | 121.2 Detected    | 108.6 Detected    | 104.7 Detected    | 113.6 Detected    | Myo15         | 0.937293729 | 0.86386139 | 1.04604052 | 0.9640884 |
| A_51_P4669 | 301.4 Detected    | 112 Detected      | 521.2 Detected    | 282.5 Detected    | Cacna1g       | 0.937292634 | 1.72926344 | 2.52232143 | 4.6535714 |
| A_51_P1301 | 24613.2 Detected  | 20811 Detected    | 25296.8 Detected  | 23068.9 Detected  | Idh3b         | 0.937257244 | 1.02777371 | 1.10849551 | 1.2155495 |
| A_55_P2092 | 8980.7 Detected   | 6779.3 Detected   | 8258.9 Detected   | 8416 Detected     | Rhbdd3        | 0.937120714 | 0.91962765 | 1.24142611 | 1.2182526 |
| A_55_P1956 | 4181.2 Detected   | 5120.2 Detected   | 7351.2 Detected   | 3918.2 Detected   | Chka          | 0.937099397 | 1.75815555 | 0.76524355 | 1.4357252 |
| A_55_P2020 | 20423 Detected    | 14814.1 Detected  | 23505 Detected    | 19138.3 Detected  | Man1b1        | 0.937095432 | 1.15090829 | 1.29189758 | 1.5866641 |
| A_55_P2130 | 3081 Detected     | 1785.2 Detected   | 2404.9 Detected   | 2887.1 Detected   | Rilp          | 0.937065888 | 0.78055826 | 1.61724177 | 1.347132  |
| A_52_P7698 | 69.9 Detected     | 71.1 Detected     | 52.1 Detected     | 65.5 Detected     | Sp2           | 0.937052933 | 0.7453505  | 0.92123769 | 0.7327707 |
| A_55_P2147 | 20199.3 Detected  | 20452.3 Detected  | 25737.7 Detected  | 18927.2 Detected  | Wdr55         | 0.937022257 | 1.27418772 | 0.92543137 | 1.2584257 |
| A_51_P5195 | 6133.1 Detected   | 5407.8 Detected   | 7010.5 Detected   | 5746.7 Detected   | 1600002K03Rik | 0.936997603 | 1.14305979 | 1.06266874 | 1.2963682 |
| A_51_P4319 | 3888.4 Detected   | 2761.7 Detected   | 2788.5 Detected   | 3643.1 Detected   | Zfp367        | 0.936914926 | 0.71713301 | 1.31915125 | 1.0097042 |
| A_51_P3124 | 3347.4 Detected   | 2287.7 Detected   | 2726.3 Detected   | 3136.2 Detected   | Atp7a         | 0.936906256 | 0.81445301 | 1.37089653 | 1.1917209 |
| A_52_P4399 | 204.4 Detected    | 121.5 Detected    | 212.1 Detected    | 191.5 Detected    | Rab43         | 0.936888454 | 1.03767123 | 1.57613169 | 1.745679  |
| A_52_P1273 | 52540.1 Detected  | 47085.4 Detected  | 48955.3 Detected  | 49223.4 Detected  | Vmp1          | 0.936872979 | 0.93177021 | 1.04540686 | 1.0397129 |
| A_51_P5044 | 17905 Detected    | 16479.7 Detected  | 15104.6 Detected  | 16774.4 Detected  | Sf3a1         | 0.936855627 | 0.84359676 | 1.01788261 | 0.9165579 |
| A_55_P2023 | 295.7 Detected    | 289.2 Detected    | 263 Detected      | 277 Detected      | Gm10687       | 0.93676023  | 0.88941495 | 0.95781466 | 0.9094053 |
| A_55_P2010 | 3541.7 Detected   | 3343.4 Detected   | 3736.2 Detected   | 3317.5 Detected   | Npm3          | 0.936697066 | 1.05491713 | 0.99225339 | 1.1174852 |
| A_55_P1957 | 166443.7 Detected | 141000.9 Detected | 163506.8 Detected | 155899.2 Detected | Rpl39         | 0.936648248 | 0.98235499 | 1.10566103 | 1.1596153 |
| A_51_P4189 | 5640.4 Detected   | 5327.4 Detected   | 3802.7 Detected   | 5282.6 Detected   | Larp1         | 0.936564783 | 0.67418977 | 0.99159064 | 0.7138004 |
| A_55_P2044 | 72.5 Detected     | 76.6 Detected     | 59.7 Detected     | 67.9 Detected     | Gm10778       | 0.936551724 | 0.82344828 | 0.88642298 | 0.7793734 |
| A_55_P1984 | 2489.3 Detected   | 1659.7 Detected   | 2156.6 Detected   | 2331.2 Detected   | Litaf         | 0.936488169 | 0.86634797 | 1.40459119 | 1.2993915 |
| A_52_P5418 | 13389 Detected    | 10806.3 Detected  | 13223.6 Detected  | 12536.7 Detected  | Vps37b        | 0.936343267 | 0.98764658 | 1.16012881 | 1.2236936 |
| A_55_P2065 | 9451.6 Detected   | 8203.7 Detected   | 6870 Detected     | 8849.6 Detected   | Kdm2b         | 0.93630708  | 0.72686106 | 1.07873277 | 0.837427  |
| A_51_P4076 | 11721.1 Detected  | 11470.2 Detected  | 12096.8 Detected  | 10973.7 Detected  | Ndc1          | 0.936234654 | 1.03205331 | 0.95671392 | 1.0546285 |
| A_55_P1954 | 201835.4 Detected | 195784.2 Detected | 222555.8 Detected | 188963.3 Detected | Rpl17         | 0.936224765 | 1.10265989 | 0.96516113 | 1.1367403 |
| A_52_P3843 | 2920.8 Detected   | 2581 Detected     | 2745.8 Detected   | 2734.5 Detected   | Tmem198b      | 0.936216105 | 0.94008491 | 1.05947307 | 1.0638512 |
| A_66_P1169 | 59.5 Detected     | 53.5 Detected     | 53.4 Detected     | 55.7 Detected     | Txlng         | 0.936134454 | 0.89747899 | 1.0411215  | 0.9981308 |
| A_55_P1987 | 48.5 Detected     | 39.5 Detected     | 33.8 Detected     | 45.4 Not Detect   | Lca5          | 0.936082474 | 0.69690722 | 1.14936709 | 0.8556962 |

|            |          |          |          |            |          |            |          |            |              |             |            |            |           |
|------------|----------|----------|----------|------------|----------|------------|----------|------------|--------------|-------------|------------|------------|-----------|
| A_55_P1967 | 3085.3   | Detected | 3148     | Detected   | 2974.2   | Detected   | 2887.7   | Detected   | Med16        | 0.935954364 | 0.96399054 | 0.91731258 | 0.9447903 |
| A_55_P2090 | 371.6    | Detected | 330.8    | Detected   | 396.4    | Detected   | 347.8    | Detected   | Mettl5       | 0.935952637 | 1.06673843 | 1.05139057 | 1.1983071 |
| A_55_P2026 | 7888.5   | Detected | 6457.6   | Detected   | 7609.2   | Detected   | 7383.2   | Detected   | Rpap1        | 0.93594473  | 0.96459403 | 1.14333499 | 1.1783325 |
| A_55_P2229 | 15.6     | Detected | 10       | Not Detect | 6.7      | Not Detect | 14.6     | Not Detect | Tmem116      | 0.935897436 | 0.42948718 | 1.46       | 0.67      |
| A_55_P1959 | 79.5     | Detected | 49.6     | Detected   | 82.4     | Detected   | 74.4     | Detected   | Rbm41        | 0.935849057 | 1.03647799 | 1.5        | 1.6612903 |
| A_52_P5160 | 2033.7   | Detected | 2207.6   | Detected   | 1495.7   | Detected   | 1903.1   | Detected   | Pla2g15      | 0.935782072 | 0.73545754 | 0.8620674  | 0.6775231 |
| A_55_P1976 | 371001.2 | Detected | 402965.4 | Detected   | 362426.1 | Detected   | 347126.9 | Detected   | Rps27a       | 0.935648995 | 0.9768866  | 0.86143103 | 0.8993976 |
| A_66_P1258 | 554.6    | Detected | 566      | Detected   | 600.8    | Detected   | 518.9    | Detected   | Nupl1        | 0.935629282 | 1.08330328 | 0.91678445 | 1.0614841 |
| A_55_P1971 | 48669.5  | Detected | 37656.3  | Detected   | 44714.6  | Detected   | 45536.1  | Detected   | Lonp1        | 0.935618817 | 0.91873966 | 1.20925582 | 1.1874401 |
| A_55_P2155 | 35.7     | Detected | 34.2     | Detected   | 27.6     | Detected   | 33.4     | Not Detect | Ksr2         | 0.93557423  | 0.77310924 | 0.97660819 | 0.8070175 |
| A_55_P2121 | 6594.8   | Detected | 6888.5   | Detected   | 7615.6   | Detected   | 6169     | Detected   | Cul2         | 0.935433978 | 1.15478862 | 0.89555056 | 1.1055527 |
| A_55_P2176 | 35.6     | Detected | 34.5     | Detected   | 17.7     | Not Detect | 33.3     | Not Detect | Cox11        | 0.935393258 | 0.49719101 | 0.96521739 | 0.5130435 |
| A_51_P2784 | 3184.1   | Detected | 3634.9   | Detected   | 2955.7   | Detected   | 2978.3   | Detected   | Itfg2        | 0.935366352 | 0.92826858 | 0.81936229 | 0.8131448 |
| A_55_P2082 | 23.2     | Detected | 96.3     | Detected   | 21.8     | Detected   | 21.7     | Not Detect | Tnfrsf9      | 0.935344828 | 0.93965517 | 0.22533749 | 0.2263759 |
| A_55_P2429 | 1685.7   | Detected | 1578.3   | Detected   | 1525.7   | Detected   | 1576.7   | Detected   | Atad2        | 0.935338435 | 0.90508394 | 0.99898625 | 0.966673  |
| A_51_P1207 | 13107.2  | Detected | 11611.8  | Detected   | 14952.6  | Detected   | 12259.2  | Detected   | Lmnb1        | 0.935302734 | 1.14079285 | 1.05575363 | 1.2877073 |
| A_55_P1967 | 1395.1   | Detected | 951.1    | Detected   | 1354.6   | Detected   | 1304.7   | Detected   | Xpa          | 0.935201778 | 0.97096982 | 1.37178004 | 1.4242456 |
| A_55_P2088 | 66271.4  | Detected | 57410.3  | Detected   | 60092.9  | Detected   | 61977.1  | Detected   | Gm13194      | 0.935201309 | 0.90676974 | 1.0795467  | 1.0467268 |
| A_51_P1877 | 22732.1  | Detected | 23447.1  | Detected   | 19306    | Detected   | 21255.5  | Detected   | Zc3h11a      | 0.935043397 | 0.84928361 | 0.90653002 | 0.8233854 |
| A_51_P1544 | 11047.5  | Detected | 8999.6   | Detected   | 11440.6  | Detected   | 10329.2  | Detected   | Ccndbp1      | 0.934980765 | 1.03558271 | 1.1477399  | 1.2712343 |
| A_52_P9289 | 159.9    | Detected | 139.9    | Detected   | 129.5    | Detected   | 149.5    | Detected   | Fam172a      | 0.93495935  | 0.80988118 | 1.06862044 | 0.9256612 |
| A_55_P2150 | 560.6    | Detected | 531.6    | Detected   | 454.1    | Detected   | 524      | Detected   | Paxip1       | 0.934712808 | 0.81002497 | 0.98570354 | 0.8542137 |
| A_55_P2282 | 39.8     | Detected | 142      | Detected   | 26       | Detected   | 37.2     | Not Detect | Gm2a         | 0.934673367 | 0.65326633 | 0.26197183 | 0.1830986 |
| A_55_P2057 | 12789.3  | Detected | 10393.4  | Detected   | 11432.5  | Detected   | 11952    | Detected   | Smap1        | 0.93453121  | 0.89391132 | 1.14996055 | 1.0999769 |
| A_55_P2098 | 33.6     | Detected | 26.5     | Detected   | 28.4     | Detected   | 31.4     | Not Detect | LOC101055656 | 0.93452381  | 0.8452381  | 1.18490566 | 1.0716981 |
| A_55_P2026 | 85.5     | Detected | 61.6     | Detected   | 59.7     | Detected   | 79.9     | Detected   | Mc5r         | 0.934502924 | 0.69824561 | 1.29707792 | 0.9691558 |
| A_55_P1993 | 16868.7  | Detected | 10985.9  | Detected   | 14346.4  | Detected   | 15763.6  | Detected   | Sh3bgrl3     | 0.934488135 | 0.85047455 | 1.43489382 | 1.3058921 |
| A_55_P1973 | 2785.6   | Detected | 2552.5   | Detected   | 3038.1   | Detected   | 2602.9   | Detected   | Krt73        | 0.934412694 | 1.09064474 | 1.01974535 | 1.1902449 |
| A_55_P2094 | 412.5    | Detected | 314.9    | Detected   | 326.2    | Detected   | 385.4    | Detected   | Zfp644       | 0.93430303  | 0.79078788 | 1.2238806  | 1.0358844 |
| A_51_P1069 | 4083.6   | Detected | 4511.9   | Detected   | 3870.1   | Detected   | 3815.3   | Detected   | Rbm26        | 0.934298168 | 0.9477177  | 0.84560828 | 0.8577539 |
| A_51_P5018 | 176.4    | Detected | 125      | Detected   | 115.7    | Detected   | 164.8    | Detected   | Hoxa2        | 0.934240363 | 0.65589569 | 1.3184     | 0.9256    |
| A_55_P1997 | 339      | Detected | 409.6    | Detected   | 261      | Detected   | 316.7    | Detected   | Gm9693       | 0.934218289 | 0.7699115  | 0.77319336 | 0.637207  |
| A_55_P1967 | 2711     | Detected | 2405.9   | Detected   | 2351.8   | Detected   | 2532.6   | Detected   | Gtf2h2       | 0.934194024 | 0.86750277 | 1.05266221 | 0.9775136 |
| A_66_P1154 | 56230.8  | Detected | 42968.9  | Detected   | 52928.7  | Detected   | 52527.7  | Detected   | Coro1c       | 0.934144632 | 0.94127596 | 1.22245857 | 1.2317909 |
| A_51_P1365 | 373.4    | Detected | 208.7    | Detected   | 351      | Detected   | 348.8    | Detected   | Lypd2        | 0.934118907 | 0.94001071 | 1.67129851 | 1.68184   |
| A_51_P4860 | 5071.6   | Detected | 4024     | Detected   | 4929.3   | Detected   | 4737.4   | Detected   | Ift52        | 0.934103636 | 0.97194179 | 1.17728628 | 1.2249751 |
| A_55_P1970 | 380119.3 | Detected | 373629.7 | Detected   | 400038.5 | Detected   | 355007.6 | Detected   | Rplp0        | 0.933937319 | 1.0524025  | 0.95015894 | 1.0706817 |
| A_55_P2058 | 1807.2   | Detected | 2066.3   | Detected   | 1676.5   | Detected   | 1687.8   | Detected   | Vamp4        | 0.933930943 | 0.92767818 | 0.81682234 | 0.8113536 |
| A_51_P4596 | 8927.7   | Detected | 3738.8   | Detected   | 12290.6  | Detected   | 8337.5   | Detected   | Lipa         | 0.933891148 | 1.37668156 | 2.22999358 | 3.2873114 |
| A_66_P1132 | 93.7     | Detected | 89.8     | Detected   | 98       | Detected   | 87.5     | Detected   | Galnt14      | 0.933831377 | 1.04589114 | 0.97438753 | 1.091314  |

|            |          |          |          |            |          |            |          |            |               |             |            |            |           |
|------------|----------|----------|----------|------------|----------|------------|----------|------------|---------------|-------------|------------|------------|-----------|
| A_51_P1831 | 554.5    | Detected | 362.4    | Detected   | 548.6    | Detected   | 517.8    | Detected   | Pcif1         | 0.933814247 | 0.98935978 | 1.42880795 | 1.5137969 |
| A_52_P3290 | 1478.5   | Detected | 861.7    | Detected   | 1277.3   | Detected   | 1380.6   | Detected   | Cep70         | 0.933784241 | 0.86391613 | 1.60218173 | 1.4823024 |
| A_55_P2160 | 397.1    | Detected | 315.9    | Detected   | 425.9    | Detected   | 370.8    | Detected   | A330069E16Rik | 0.933769831 | 1.07252581 | 1.17378917 | 1.3482115 |
| A_66_P1387 | 54621.8  | Detected | 45254.8  | Detected   | 58776.6  | Detected   | 51001    | Detected   | Tceb2         | 0.933711449 | 1.07606487 | 1.12697438 | 1.2987926 |
| A_66_P1161 | 4749.9   | Detected | 3982.3   | Detected   | 4092.6   | Detected   | 4434.8   | Detected   | Cstf2         | 0.933661761 | 0.86161814 | 1.1136278  | 1.0276976 |
| A_51_P1581 | 3545.1   | Detected | 2707     | Detected   | 2716.4   | Detected   | 3309.7   | Detected   | B3galnt2      | 0.933598488 | 0.76624073 | 1.22264499 | 1.0034725 |
| A_55_P2139 | 450712.8 | Detected | 443660.4 | Detected   | 460886.7 | Detected   | 420695.5 | Detected   | Gm10420       | 0.933400383 | 1.02257291 | 0.94823766 | 1.0388277 |
| A_51_P1706 | 38508.6  | Detected | 37056.2  | Detected   | 36384.6  | Detected   | 35942.9  | Detected   | Ddx54         | 0.933373324 | 0.94484349 | 0.96995644 | 0.9818762 |
| A_51_P4292 | 21908.6  | Detected | 16228    | Detected   | 20409.1  | Detected   | 20448.2  | Detected   | Smpd1         | 0.933341245 | 0.93155656 | 1.26005669 | 1.2576473 |
| A_55_P2048 | 196352.2 | Detected | 187413.5 | Detected   | 176275.6 | Detected   | 183239.3 | Detected   | Dennd4a       | 0.933217453 | 0.8977521  | 0.97772732 | 0.9405704 |
| A_55_P1994 | 10408.7  | Detected | 9641.2   | Detected   | 9858.1   | Detected   | 9712.4   | Detected   | Lsm14a        | 0.933104038 | 0.94710194 | 1.00738497 | 1.0224972 |
| A_55_P2179 | 49.3     | Detected | 32.4     | Detected   | 67       | Detected   | 46       | Not Detect | Syn3          | 0.93306288  | 1.35902637 | 1.41975309 | 2.0679012 |
| A_55_P2004 | 155.2    | Detected | 102.5    | Detected   | 103.3    | Detected   | 144.8    | Detected   | Ear6          | 0.932989691 | 0.66559278 | 1.41268293 | 1.0078049 |
| A_51_P4065 | 756.5    | Detected | 484.1    | Detected   | 507.7    | Detected   | 705.8    | Detected   | AI464131      | 0.932980833 | 0.67111699 | 1.45796323 | 1.0487503 |
| A_55_P2059 | 244160.9 | Detected | 200474.3 | Detected   | 270436.7 | Detected   | 227796.5 | Detected   | Gm9385        | 0.932976984 | 1.10761674 | 1.13628779 | 1.3489844 |
| A_55_P2181 | 175683   | Detected | 175053.8 | Detected   | 190067.4 | Detected   | 163906.3 | Detected   | Rpl17         | 0.932966195 | 1.08187702 | 0.93631958 | 1.0857656 |
| A_55_P2094 | 8464.4   | Detected | 6868.4   | Detected   | 9918     | Detected   | 7896.3   | Detected   | Hist2h3b      | 0.932883607 | 1.17173101 | 1.1496564  | 1.4440044 |
| A_51_P2997 | 527.2    | Detected | 686.4    | Detected   | 524.3    | Detected   | 491.8    | Detected   | D10Wsu102e    | 0.932852807 | 0.99449924 | 0.71649184 | 0.7638403 |
| A_51_P5052 | 3458.6   | Detected | 2660.9   | Detected   | 2904.6   | Detected   | 3225.9   | Detected   | Gtpbp8        | 0.932718441 | 0.83981958 | 1.21233417 | 1.0915856 |
| A_55_P2174 | 4530.4   | Detected | 2788.2   | Detected   | 5171.5   | Detected   | 4225.3   | Detected   | Snap29        | 0.932654953 | 1.14151068 | 1.51542214 | 1.8547809 |
| A_51_P4533 | 11943.5  | Detected | 10798.1  | Detected   | 9860.7   | Detected   | 11139.1  | Detected   | Lpgat1        | 0.932649558 | 0.82561226 | 1.03157963 | 0.9131884 |
| A_51_P1291 | 2404.4   | Detected | 3044.8   | Detected   | 2516.5   | Detected   | 2242.4   | Detected   | Sec63         | 0.932623524 | 1.04662286 | 0.73646873 | 0.8264911 |
| A_51_P2578 | 17.8     | Detected | 14.5     | Not Detect | 16.3     | Detected   | 16.6     | Not Detect | Adam25        | 0.93258427  | 0.91573034 | 1.14482759 | 1.1241379 |
| A_51_P2577 | 853.5    | Detected | 616      | Detected   | 779.9    | Detected   | 795.9    | Detected   | Kat2b         | 0.932513181 | 0.91376684 | 1.29204545 | 1.2660714 |
| A_55_P2021 | 2942.2   | Detected | 2611.4   | Detected   | 1700.9   | Detected   | 2743.6   | Detected   | Malat1        | 0.93249949  | 0.57810482 | 1.05062419 | 0.6513364 |
| A_51_P3866 | 530.1    | Detected | 759.6    | Detected   | 480.4    | Detected   | 494.3    | Detected   | Dse           | 0.932465573 | 0.9062441  | 0.65073723 | 0.6324381 |
| A_55_P2087 | 25570.8  | Detected | 14525.8  | Detected   | 15822.9  | Detected   | 23843.3  | Detected   | Otud3         | 0.932442473 | 0.61878784 | 1.64144488 | 1.0892963 |
| A_52_P5991 | 816.8    | Detected | 442      | Detected   | 865.4    | Detected   | 761.6    | Detected   | Tug1          | 0.932419197 | 1.05950049 | 1.72307692 | 1.9579186 |
| A_52_P1543 | 48.8     | Detected | 31.6     | Detected   | 36.7     | Detected   | 45.5     | Detected   | Nme6          | 0.932377049 | 0.75204918 | 1.43987342 | 1.1613924 |
| A_55_P2026 | 32.5     | Detected | 39       | Detected   | 29.6     | Detected   | 30.3     | Not Detect | C530030P08Rik | 0.932307692 | 0.91076923 | 0.77692308 | 0.7589744 |
| A_51_P3736 | 10620    | Detected | 9628.2   | Detected   | 11081.7  | Detected   | 9901     | Detected   | Yars2         | 0.932297552 | 1.04347458 | 1.02833344 | 1.1509628 |
| A_51_P3760 | 2111.6   | Detected | 1335.1   | Detected   | 1562.3   | Detected   | 1968.6   | Detected   | Bcor1l        | 0.932278841 | 0.7398655  | 1.47449629 | 1.1701745 |
| A_66_P1002 | 277.5    | Detected | 245.7    | Detected   | 200.2    | Detected   | 258.7    | Detected   | LOC101056016  | 0.932252252 | 0.72144144 | 1.05291005 | 0.8148148 |
| A_51_P1447 | 139440.2 | Detected | 161185.5 | Detected   | 144900.1 | Detected   | 129979   | Detected   | Cct5          | 0.932148692 | 1.03915585 | 0.80639388 | 0.8989649 |
| A_55_P2148 | 6363.2   | Detected | 6967.5   | Detected   | 6041.6   | Detected   | 5931.2   | Detected   | Larp7         | 0.93210963  | 0.94945939 | 0.85126659 | 0.8671116 |
| A_55_P1969 | 30.9     | Detected | 32.9     | Detected   | 21.4     | Detected   | 28.8     | Not Detect | Ttc23l        | 0.932038835 | 0.69255663 | 0.87537994 | 0.6504559 |
| A_52_P7938 | 7822     | Detected | 5927.9   | Detected   | 7876     | Detected   | 7290.2   | Detected   | Magt1         | 0.932012273 | 1.00690361 | 1.22981157 | 1.3286324 |
| A_51_P2276 | 77.9     | Detected | 161.8    | Detected   | 54.9     | Detected   | 72.6     | Detected   | Gabrb2        | 0.931964056 | 0.70474968 | 0.4487021  | 0.3393078 |
| A_55_P1957 | 1857.5   | Detected | 1396.5   | Detected   | 1659.2   | Detected   | 1731.1   | Detected   | Dlg1          | 0.931951548 | 0.89324361 | 1.239599   | 1.1881131 |
| A_55_P2169 | 19.1     | Detected | 20.5     | Detected   | 16.1     | Not Detect | 17.8     | Not Detect | Hoxc12        | 0.931937173 | 0.84293194 | 0.86829268 | 0.7853659 |

|            |                   |                   |                   |                   |               |             |            |            |           |
|------------|-------------------|-------------------|-------------------|-------------------|---------------|-------------|------------|------------|-----------|
| A_55_P2034 | 456.7 Detected    | 385 Detected      | 487.8 Detected    | 425.6 Detected    | Chchd5        | 0.931902781 | 1.06809722 | 1.10545455 | 1.267013  |
| A_55_P2030 | 27.9 Detected     | 32.8 Detected     | 32.4 Detected     | 26 Not Detect     | 6330403A02Rik | 0.931899642 | 1.16129032 | 0.79268293 | 0.9878049 |
| A_55_P1965 | 32.2 Detected     | 33.6 Detected     | 25.8 Detected     | 30 Not Detect     | Opn1mw        | 0.931677019 | 0.80124224 | 0.89285714 | 0.7678571 |
| A_52_P6445 | 5475.3 Detected   | 6170.2 Detected   | 4212.2 Detected   | 5101.2 Detected   | Dhrsx         | 0.931674977 | 0.76930944 | 0.82674792 | 0.6826683 |
| A_52_P6028 | 2333 Detected     | 1959.2 Detected   | 1718 Detected     | 2173.5 Detected   | Nkrf          | 0.93163309  | 0.73639091 | 1.10938138 | 0.8768885 |
| A_52_P8362 | 1340 Detected     | 1338.4 Detected   | 1248.1 Detected   | 1248.1 Detected   | Rapgef6       | 0.93141791  | 0.93141791 | 0.93253138 | 0.9325314 |
| A_55_P2113 | 48.1 Detected     | 45.3 Detected     | 35.7 Detected     | 44.8 Not Detect   | Ikzf3         | 0.931392931 | 0.74220374 | 0.98896247 | 0.7880795 |
| A_51_P1624 | 35323.4 Detected  | 36413.5 Detected  | 38321 Detected    | 32898.4 Detected  | Dnajc9        | 0.931348624 | 1.08486159 | 0.90346712 | 1.0523844 |
| A_55_P2004 | 230314.2 Detected | 188384.5 Detected | 246572.4 Detected | 214497.9 Detected | Rpl24         | 0.931327291 | 1.07059139 | 1.13861756 | 1.3088784 |
| A_65_P1885 | 31448.1 Detected  | 29105.9 Detected  | 31314.6 Detected  | 29288.4 Detected  | Btf3          | 0.931324945 | 0.99575491 | 1.00627021 | 1.075885  |
| A_65_P1925 | 4493.9 Detected   | 2276.5 Detected   | 4142.8 Detected   | 4184.9 Detected   | Ap2m1         | 0.931240126 | 0.92187187 | 1.83830441 | 1.8198111 |
| A_51_P2818 | 32771.5 Detected  | 32601.2 Detected  | 29666.8 Detected  | 30515.5 Detected  | Cactin        | 0.931159697 | 0.90526219 | 0.93602383 | 0.909991  |
| A_52_P6005 | 252.7 Detected    | 249.2 Detected    | 213.7 Detected    | 235.3 Detected    | Zfp39         | 0.931143649 | 0.8456668  | 0.94422151 | 0.8575441 |
| A_51_P3747 | 6822.2 Detected   | 6348.7 Detected   | 5713.7 Detected   | 6352.3 Detected   | Arfgef1       | 0.931121925 | 0.83751576 | 1.00056705 | 0.8999795 |
| A_55_P2037 | 114180.8 Detected | 102684.1 Detected | 122026.5 Detected | 106315.4 Detected | Rpl7a         | 0.931114513 | 1.06871295 | 1.0353638  | 1.188368  |
| A_55_P2013 | 12750.3 Detected  | 8476.9 Detected   | 9358.1 Detected   | 11871.2 Detected  | Shb           | 0.931052603 | 0.73395136 | 1.40041761 | 1.1039531 |
| A_55_P2002 | 46.4 Detected     | 49.4 Detected     | 52.7 Detected     | 43.2 Not Detect   | Phf8          | 0.931034483 | 1.13577586 | 0.87449393 | 1.0668016 |
| A_51_P2683 | 7819.8 Detected   | 6071.4 Detected   | 8080.9 Detected   | 7280 Detected     | Aagab         | 0.930970102 | 1.0333896  | 1.19906447 | 1.330978  |
| A_55_P2326 | 4536.2 Detected   | 4126.8 Detected   | 3733 Detected     | 4223 Detected     | 9430085M18Rik | 0.930955425 | 0.8229355  | 1.02331104 | 0.904575  |
| A_55_P2075 | 35109.9 Detected  | 37355.3 Detected  | 35557.3 Detected  | 32682.1 Detected  | Atic          | 0.930851412 | 1.01274284 | 0.87489861 | 0.9518676 |
| A_55_P1967 | 13236.9 Detected  | 12346.1 Detected  | 11974 Detected    | 12321 Detected    | Abhd11        | 0.930807062 | 0.90459247 | 0.99796697 | 0.9698609 |
| A_55_P2025 | 13735.9 Detected  | 13729.1 Detected  | 14291.9 Detected  | 12785.1 Detected  | Psme2b        | 0.930779927 | 1.04047787 | 0.93124094 | 1.0409932 |
| A_55_P2408 | 39 Detected       | 26 Detected       | 29.1 Detected     | 36.3 Not Detect   | 4933406K04Rik | 0.930769231 | 0.74615385 | 1.39615385 | 1.1192308 |
| A_52_P4409 | 2208.5 Detected   | 2097.2 Detected   | 2516.4 Detected   | 2055.6 Detected   | Cdc73         | 0.930767489 | 1.13941589 | 0.98016403 | 1.1998856 |
| A_65_P1749 | 4156.6 Detected   | 3457 Detected     | 4496.6 Detected   | 3868.8 Detected   | Med29         | 0.930760718 | 1.08179762 | 1.11912062 | 1.3007232 |
| A_55_P1991 | 129.9 Detected    | 309.2 Detected    | 77.7 Detected     | 120.9 Detected    | Speg          | 0.930715935 | 0.59815242 | 0.39100906 | 0.2512937 |
| A_55_P2249 | 8358.9 Detected   | 6710.7 Detected   | 9531.4 Detected   | 7779.7 Detected   | Nucks1        | 0.930708586 | 1.14026965 | 1.15929784 | 1.4203287 |
| A_55_P2198 | 20.2 Detected     | 7.1 Not Detect    | 13.3 Not Detect   | 18.8 Not Detect   | AU018794      | 0.930693069 | 0.65841584 | 2.64788732 | 1.8732394 |
| A_55_P2117 | 261.1 Detected    | 199.8 Detected    | 98.7 Detected     | 243 Detected      | Rnf165        | 0.930677901 | 0.37801609 | 1.21621622 | 0.493994  |
| A_52_P1610 | 475.8 Detected    | 276.6 Detected    | 476.3 Detected    | 442.8 Detected    | 2610008E11Rik | 0.930643127 | 1.00105086 | 1.60086768 | 1.7219812 |
| A_51_P3434 | 4202.3 Detected   | 4383.8 Detected   | 2899 Detected     | 3910.3 Detected   | Slc25a37      | 0.930514242 | 0.68986031 | 0.89198869 | 0.6612984 |
| A_55_P2201 | 1215.9 Detected   | 1008 Detected     | 895.2 Detected    | 1131.4 Detected   | 1110037F02Rik | 0.930504153 | 0.73624476 | 1.12242063 | 0.8880952 |
| A_51_P4283 | 36933.3 Detected  | 39447.9 Detected  | 36710.9 Detected  | 34366.3 Detected  | Psma6         | 0.930496327 | 0.99397833 | 0.87118199 | 0.9306173 |
| A_51_P1744 | 2554.2 Detected   | 2418.5 Detected   | 2018.9 Detected   | 2376.5 Detected   | Cenpj         | 0.930428314 | 0.79042362 | 0.98263386 | 0.8347736 |
| A_51_P1654 | 1892.5 Detected   | 1546.9 Detected   | 2076.5 Detected   | 1760.8 Detected   | C1galt1       | 0.930409511 | 1.09722589 | 1.13827655 | 1.3423621 |
| A_55_P1972 | 4095.9 Detected   | 3321.4 Detected   | 4313.5 Detected   | 3810.2 Detected   | Ccndbp1       | 0.93024732  | 1.0531263  | 1.14716686 | 1.2986993 |
| A_52_P6334 | 1334 Detected     | 1560.4 Detected   | 650.4 Detected    | 1240.9 Detected   | Akap11        | 0.930209895 | 0.48755622 | 0.79524481 | 0.4168162 |
| A_55_P1981 | 58584.2 Detected  | 59011.9 Detected  | 57870.9 Detected  | 54492.7 Detected  | Nup85         | 0.93016035  | 0.98782436 | 0.92341884 | 0.9806649 |
| A_55_P2068 | 1725.2 Detected   | 1602.1 Detected   | 11 Not Detect     | 1604.7 Detected   | Armcx3        | 0.930153026 | 0.00637607 | 1.00162287 | 0.006866  |
| A_55_P1966 | 68.6 Detected     | 67.7 Detected     | 45.2 Detected     | 63.8 Detected     | Rtbdn         | 0.930029155 | 0.65889213 | 0.94239291 | 0.6676514 |

|            |          |          |          |          |          |          |          |            |               |             |            |            |           |
|------------|----------|----------|----------|----------|----------|----------|----------|------------|---------------|-------------|------------|------------|-----------|
| A_55_P2150 | 100795.4 | Detected | 81033.9  | Detected | 114198.6 | Detected | 93735.6  | Detected   | Atp5c1        | 0.929959105 | 1.13297432 | 1.15674551 | 1.4092695 |
| A_55_P1994 | 7468.3   | Detected | 4993.2   | Detected | 7534     | Detected | 6945     | Detected   | Tti1          | 0.929930506 | 1.00879718 | 1.39089161 | 1.508852  |
| A_55_P1964 | 286.7    | Detected | 212.5    | Detected | 206.5    | Detected | 266.6    | Detected   | Zfp217        | 0.929891873 | 0.72026509 | 1.25458824 | 0.9717647 |
| A_55_P1980 | 27.1     | Detected | 18.4     | Detected | 17.8     | Detected | 25.2     | Not Detect | Gm9919        | 0.929889299 | 0.65682657 | 1.36956522 | 0.9673913 |
| A_55_P2211 | 44.2     | Detected | 41.6     | Detected | 51.1     | Detected | 41.1     | Not Detect | Smr2          | 0.929864253 | 1.1561086  | 0.98798077 | 1.2283654 |
| A_51_P5195 | 12103.8  | Detected | 9533.3   | Detected | 11672.7  | Detected | 11254.8  | Detected   | Gnb1l         | 0.929856739 | 0.96438309 | 1.18057755 | 1.2244134 |
| A_51_P1239 | 21321.6  | Detected | 20041.1  | Detected | 26713.1  | Detected | 19825.6  | Detected   | D17Wsu104e    | 0.92983641  | 1.25286564 | 0.9892471  | 1.3329159 |
| A_51_P3978 | 45.6     | Detected | 46.8     | Detected | 43.6     | Detected | 42.4     | Not Detect | En2           | 0.929824561 | 0.95614035 | 0.90598291 | 0.9316239 |
| A_52_P3309 | 1146.9   | Detected | 644      | Detected | 758.7    | Detected | 1066.4   | Detected   | C2cd2         | 0.929810794 | 0.66152236 | 1.65590062 | 1.1781056 |
| A_55_P1993 | 48926    | Detected | 36966.7  | Detected | 48340.4  | Detected | 45489.8  | Detected   | Hmgn2         | 0.929767404 | 0.9880309  | 1.23056156 | 1.3076742 |
| A_55_P2154 | 397      | Detected | 340.5    | Detected | 273      | Detected | 369.1    | Detected   | Cbx1          | 0.929722922 | 0.68765743 | 1.08399413 | 0.8017621 |
| A_51_P3967 | 48474.7  | Detected | 50688    | Detected | 47339.1  | Detected | 45067.9  | Detected   | Sugt1         | 0.92972004  | 0.97657335 | 0.88912366 | 0.9339311 |
| A_52_P3325 | 44.1     | Detected | 33.1     | Detected | 46.8     | Detected | 41       | Not Detect | Gm9798        | 0.929705215 | 1.06122449 | 1.23867069 | 1.4138973 |
| A_55_P2067 | 25.6     | Detected | 34.7     | Detected | 26.3     | Detected | 23.8     | Not Detect | Pcdhgb1       | 0.9296875   | 1.02734375 | 0.68587896 | 0.7579251 |
| A_55_P2089 | 15466.7  | Detected | 17179.9  | Detected | 14186.5  | Detected | 14379    | Detected   | Sypl          | 0.929674721 | 0.91722863 | 0.83696645 | 0.8257615 |
| A_55_P2061 | 170231   | Detected | 169824.8 | Detected | 189142.7 | Detected | 158259.3 | Detected   | Gm7634        | 0.929673796 | 1.11109434 | 0.93189746 | 1.1137519 |
| A_55_P2133 | 62168.9  | Detected | 70151.3  | Detected | 47575.9  | Detected | 57795.5  | Detected   | Tax1bp3       | 0.929652929 | 0.76526849 | 0.82386927 | 0.6781899 |
| A_51_P1222 | 28131.4  | Detected | 27173.8  | Detected | 25571.9  | Detected | 26151.5  | Detected   | Uchl5         | 0.929619571 | 0.90901626 | 0.9623792  | 0.9410498 |
| A_55_P1977 | 11370.8  | Detected | 7431.6   | Detected | 9384.4   | Detected | 10570.3  | Detected   | Ulk1          | 0.92960038  | 0.82530693 | 1.42234512 | 1.2627698 |
| A_55_P2086 | 2178.5   | Detected | 2011.7   | Detected | 1827.8   | Detected | 2025.1   | Detected   | Rad54l        | 0.929584577 | 0.83901767 | 1.00666103 | 0.9085848 |
| A_55_P2002 | 39875.2  | Detected | 37927.6  | Detected | 48498.4  | Detected | 37066    | Detected   | Sumo1         | 0.929550197 | 1.21625471 | 0.97728303 | 1.27871   |
| A_55_P2103 | 1288.7   | Detected | 1138.5   | Detected | 1743.4   | Detected | 1197.9   | Detected   | Golt1a        | 0.929541398 | 1.35283619 | 1.05217391 | 1.5313131 |
| A_52_P4318 | 1574.9   | Detected | 617.3    | Detected | 1199.8   | Detected | 1463.9   | Detected   | Pknx1         | 0.929519335 | 0.76182615 | 2.37145634 | 1.9436255 |
| A_65_P0928 | 2409     | Detected | 1896.6   | Detected | 3210.5   | Detected | 2239.2   | Detected   | 2610524H06Rik | 0.929514321 | 1.33271067 | 1.18063904 | 1.692766  |
| A_52_P1623 | 1089.2   | Detected | 593.8    | Detected | 1005.4   | Detected | 1012.4   | Detected   | Gabbr1        | 0.929489534 | 0.9230628  | 1.70495116 | 1.6931627 |
| A_52_P2441 | 3253.4   | Detected | 3940     | Detected | 1410.5   | Detected | 3023.7   | Detected   | Isoc1         | 0.929396939 | 0.43354644 | 0.76743655 | 0.3579949 |
| A_55_P2125 | 364263.9 | Detected | 349792   | Detected | 367872.9 | Detected | 338510.5 | Detected   | Gm8842        | 0.929300158 | 1.00990765 | 0.96774798 | 1.0516904 |
| A_55_P2165 | 4886.1   | Detected | 5292.3   | Detected | 6036.1   | Detected | 4540.4   | Detected   | Acs13         | 0.929248276 | 1.23536154 | 0.85792567 | 1.1405438 |
| A_51_P3628 | 9771.2   | Detected | 9578.2   | Detected | 9661.5   | Detected | 9079.5   | Detected   | Fbxo38        | 0.929210332 | 0.98877313 | 0.94793385 | 1.0086968 |
| A_52_P5785 | 292.1    | Detected | 305.7    | Detected | 290.8    | Detected | 271.4    | Detected   | Cdip1         | 0.929133858 | 0.99554947 | 0.8877985  | 0.9512594 |
| A_51_P2377 | 191941.1 | Detected | 139226.5 | Detected | 190642.2 | Detected | 178331.3 | Detected   | Ptrf          | 0.929093873 | 0.99323282 | 1.28087182 | 1.3692954 |
| A_51_P4991 | 11269.9  | Detected | 9962.8   | Detected | 10909.4  | Detected | 10470.4  | Detected   | Tram1         | 0.92905882  | 0.96801214 | 1.05094953 | 1.0950135 |
| A_52_P1315 | 2358.6   | Detected | 2393.6   | Detected | 2141.5   | Detected | 2191     | Detected   | Srprb         | 0.928940897 | 0.90795387 | 0.91535762 | 0.8946775 |
| A_52_P2447 | 5354.9   | Detected | 3248.4   | Detected | 3039.6   | Detected | 4974.1   | Detected   | Tbcel         | 0.928887561 | 0.56762965 | 1.53124615 | 0.9357222 |
| A_55_P2047 | 7964.1   | Detected | 7219.6   | Detected | 7194.5   | Detected | 7397.6   | Detected   | Zc3h7b        | 0.928868296 | 0.90336636 | 1.02465511 | 0.9965234 |
| A_55_P2017 | 105.4    | Detected | 88.2     | Detected | 72       | Detected | 97.9     | Detected   | Ezh1          | 0.928842505 | 0.68311195 | 1.10997732 | 0.8163265 |
| A_55_P2126 | 1090.3   | Detected | 952.1    | Detected | 1244.4   | Detected | 1012.7   | Detected   | Gm5792        | 0.928826928 | 1.14133725 | 1.06364878 | 1.3070056 |
| A_51_P4012 | 950.9    | Detected | 874.9    | Detected | 792.3    | Detected | 883      | Detected   | Eme1          | 0.928593964 | 0.83321064 | 1.0092582  | 0.9055892 |
| A_51_P1304 | 40.6     | Detected | 41.8     | Detected | 36.5     | Detected | 37.7     | Not Detect | Zcchc13       | 0.928571429 | 0.89901478 | 0.90191388 | 0.8732057 |
| A_55_P2141 | 543      | Detected | 446.5    | Detected | 515.3    | Detected | 504.2    | Detected   | Ly6g6c        | 0.92854512  | 0.94898711 | 1.12922732 | 1.1540873 |

|            |          |          |          |          |          |          |          |            |               |             |            |            |           |
|------------|----------|----------|----------|----------|----------|----------|----------|------------|---------------|-------------|------------|------------|-----------|
| A_51_P1208 | 26.5     | Detected | 23       | Detected | 28       | Detected | 24.6     | Not Detect | Olf868        | 0.928301887 | 1.05660377 | 1.06956522 | 1.2173913 |
| A_55_P1977 | 9213.1   | Detected | 8823.7   | Detected | 6907.7   | Detected | 8552.5   | Detected   | Irf2bpl       | 0.92829775  | 0.74976935 | 0.96926459 | 0.7828575 |
| A_51_P2658 | 52334.7  | Detected | 53776    | Detected | 54745.7  | Detected | 48580    | Detected   | Hspa9         | 0.928256014 | 1.04606886 | 0.90337697 | 1.0180322 |
| A_55_P2110 | 57980.5  | Detected | 77207.9  | Detected | 55161.5  | Detected | 53819.2  | Detected   | Npm1          | 0.928229318 | 0.95138021 | 0.69706856 | 0.7144541 |
| A_66_P1323 | 160.1    | Detected | 185.8    | Detected | 169.9    | Detected | 148.6    | Detected   | Crnk11        | 0.928169894 | 1.06121174 | 0.79978471 | 0.9144241 |
| A_55_P1958 | 6539.6   | Detected | 5432.8   | Detected | 6350.5   | Detected | 6069.8   | Detected   | Gm9079        | 0.928160744 | 0.97108386 | 1.11725077 | 1.1689184 |
| A_52_P5878 | 14747.6  | Detected | 19385.4  | Detected | 15430.6  | Detected | 13687.7  | Detected   | Ddx56         | 0.928130679 | 1.04631262 | 0.70608293 | 0.7959908 |
| A_55_P2005 | 34790    | Detected | 21771.6  | Detected | 36770.7  | Detected | 32289.1  | Detected   | Klhl22        | 0.928114401 | 1.05693303 | 1.48308347 | 1.6889296 |
| A_55_P2118 | 2021.3   | Detected | 2103.6   | Detected | 1816.8   | Detected | 1875.8   | Detected   | Tgs1          | 0.928016623 | 0.89882749 | 0.89170945 | 0.8636623 |
| A_55_P1969 | 2375.4   | Detected | 2239.8   | Detected | 2985.6   | Detected | 2204.2   | Detected   | Adar          | 0.927927928 | 1.25688305 | 0.98410572 | 1.3329762 |
| A_66_P1058 | 59123.2  | Detected | 48647    | Detected | 70426.2  | Detected | 54859.8  | Detected   | 1700028B04Rik | 0.927889559 | 1.19117707 | 1.12771188 | 1.4476987 |
| A_51_P1187 | 7649.8   | Detected | 7363.3   | Detected | 7098.7   | Detected | 7097.4   | Detected   | Ahctf1        | 0.927788962 | 0.9279589  | 0.96388847 | 0.964065  |
| A_55_P1992 | 49678.9  | Detected | 45284.6  | Detected | 46158.2  | Detected | 46090.1  | Detected   | Pafah1b1      | 0.927760075 | 0.92913088 | 1.0177875  | 1.0192913 |
| A_55_P2186 | 6756.4   | Detected | 7257.3   | Detected | 5903     | Detected | 6268.3   | Detected   | Gm12620       | 0.927757386 | 0.87369013 | 0.86372342 | 0.8133879 |
| A_55_P1998 | 413179.8 | Detected | 401385.2 | Detected | 420070.8 | Detected | 383314.8 | Detected   | Rpl9          | 0.927719119 | 1.01667797 | 0.9549799  | 1.0465528 |
| A_51_P1870 | 14126    | Detected | 15726.8  | Detected | 15069.3  | Detected | 13104.8  | Detected   | Magohb        | 0.927707773 | 1.06677757 | 0.83327823 | 0.9581924 |
| A_52_P6335 | 190.8    | Detected | 156      | Detected | 179.4    | Detected | 177      | Detected   | Nodal         | 0.927672956 | 0.94025157 | 1.13461538 | 1.15      |
| A_51_P4643 | 70.5     | Detected | 582.1    | Detected | 263.3    | Detected | 65.4     | Detected   | Gnb4          | 0.927659574 | 3.73475177 | 0.11235183 | 0.4523278 |
| A_55_P2149 | 1585.1   | Detected | 1660.9   | Detected | 1807.9   | Detected | 1470.4   | Detected   | Mapk1ip1l     | 0.927638635 | 1.14055896 | 0.88530315 | 1.0885062 |
| A_55_P2104 | 143.7    | Detected | 128.5    | Detected | 123.1    | Detected | 133.3    | Detected   | Map3k10       | 0.927627001 | 0.85664579 | 1.03735409 | 0.9579767 |
| A_52_P2711 | 3756.5   | Detected | 3950.1   | Detected | 4226.9   | Detected | 3484.5   | Detected   | Mtpap         | 0.927592174 | 1.12522295 | 0.88212957 | 1.0700742 |
| A_55_P2160 | 5877.7   | Detected | 4551.6   | Detected | 2811.2   | Detected | 5452.1   | Detected   | Bicd2         | 0.927590724 | 0.47828232 | 1.19784252 | 0.617629  |
| A_55_P1977 | 109.1    | Detected | 105.6    | Detected | 84.7     | Detected | 101.2    | Detected   | Arntl2        | 0.927589368 | 0.77635197 | 0.95833333 | 0.8020833 |
| A_51_P2939 | 1569.9   | Detected | 1160.5   | Detected | 1029.4   | Detected | 1456.2   | Detected   | Plekho2       | 0.927575005 | 0.65571055 | 1.25480396 | 0.8870315 |
| A_55_P2244 | 328.2    | Detected | 326.4    | Detected | 230.9    | Detected | 304.4    | Detected   | 4930422G04Rik | 0.927483242 | 0.70353443 | 0.93259804 | 0.7074142 |
| A_55_P2180 | 766.4    | Detected | 988.1    | Detected | 1070.7   | Detected | 710.8    | Detected   | Fam60a        | 0.927453027 | 1.39705115 | 0.71936039 | 1.0835948 |
| A_55_P1985 | 3712.1   | Detected | 3072.7   | Detected | 3537.7   | Detected | 3442.6   | Detected   | Wrap73        | 0.927399585 | 0.95301851 | 1.12038273 | 1.1513327 |
| A_66_P1403 | 258.7    | Detected | 161.8    | Detected | 221.7    | Detected | 239.9    | Detected   | Wdr76         | 0.927328952 | 0.85697719 | 1.48269468 | 1.3702101 |
| A_52_P5075 | 228.4    | Detected | 252.5    | Detected | 195.9    | Detected | 211.8    | Detected   | Slamf6        | 0.92732049  | 0.85770578 | 0.83881188 | 0.7758416 |
| A_55_P2033 | 3294.9   | Detected | 2556.7   | Detected | 3915.2   | Detected | 3055.4   | Detected   | Crls1         | 0.927311906 | 1.18826065 | 1.19505613 | 1.531349  |
| A_52_P4747 | 7681.8   | Detected | 7524.5   | Detected | 7301.4   | Detected | 7123.3   | Detected   | Denr          | 0.927295686 | 0.95048036 | 0.94668084 | 0.9703502 |
| A_55_P2065 | 169656.1 | Detected | 156528   | Detected | 188832.1 | Detected | 157314.3 | Detected   | Rpl27a        | 0.927254016 | 1.11302865 | 1.00502338 | 1.2063791 |
| A_52_P4372 | 53.6     | Detected | 56.9     | Detected | 70.5     | Detected | 49.7     | Detected   | Dna2          | 0.927238806 | 1.31529851 | 0.87346221 | 1.2390158 |
| A_55_P2095 | 64312.8  | Detected | 57502.5  | Detected | 65446.9  | Detected | 59631.9  | Detected   | Usp5          | 0.927216666 | 1.01763413 | 1.03703143 | 1.1381575 |
| A_55_P2083 | 14132    | Detected | 15652.1  | Detected | 14017.8  | Detected | 13103.4  | Detected   | Acp1          | 0.927214832 | 0.99191905 | 0.83716562 | 0.8955859 |
| A_55_P2028 | 5624.9   | Detected | 7377.9   | Detected | 4836     | Detected | 5215.4   | Detected   | Ccser2        | 0.927198706 | 0.85974862 | 0.70689492 | 0.6554711 |
| A_51_P1055 | 27829.8  | Detected | 24220.8  | Detected | 32081.1  | Detected | 25802.9  | Detected   | Eci1          | 0.927168    | 1.15276071 | 1.06531989 | 1.3245269 |
| A_55_P2078 | 118      | Detected | 96.4     | Detected | 87.7     | Detected | 109.4    | Detected   | Ankrd13b      | 0.927118644 | 0.74322034 | 1.13485477 | 0.909751  |
| A_52_P6149 | 4017.2   | Detected | 3259.7   | Detected | 4261.1   | Detected | 3724.4   | Detected   | Skiv2l        | 0.927113412 | 1.06071393 | 1.14255913 | 1.3072062 |
| A_66_P1028 | 187.9    | Detected | 122      | Detected | 123.1    | Detected | 174.2    | Detected   | Thra          | 0.927088877 | 0.65513571 | 1.42786885 | 1.0090164 |

|            |          |          |          |          |          |          |          |            |          |             |            |            |           |
|------------|----------|----------|----------|----------|----------|----------|----------|------------|----------|-------------|------------|------------|-----------|
| A_51_P2937 | 701.7    | Detected | 664.2    | Detected | 544.6    | Detected | 650.5    | Detected   | Fkbp1b   | 0.927034345 | 0.77611515 | 0.97937368 | 0.8199338 |
| A_55_P1975 | 41.1     | Detected | 38.7     | Detected | 25.3     | Detected | 38.1     | Not Detect | Rhox4e   | 0.927007299 | 0.61557178 | 0.98449612 | 0.6537468 |
| A_55_P2093 | 12451.6  | Detected | 9682.1   | Detected | 12661.4  | Detected | 11542.7  | Detected   | Snapc4   | 0.927005365 | 1.01684924 | 1.19216905 | 1.3077122 |
| A_55_P2023 | 1003.1   | Detected | 1259.4   | Detected | 1006.7   | Detected | 929.8    | Detected   | Pes1     | 0.926926528 | 1.00358887 | 0.73828807 | 0.7993489 |
| A_55_P1996 | 2047.9   | Detected | 1493.8   | Detected | 1200     | Detected | 1898.2   | Detected   | Baz2b    | 0.926900728 | 0.58596611 | 1.27071897 | 0.8033204 |
| A_52_P5552 | 7887.9   | Detected | 7666.8   | Detected | 7819.9   | Detected | 7311.1   | Detected   | Rgs19    | 0.926875341 | 0.9913792  | 0.95360515 | 1.0199692 |
| A_55_P2062 | 35167.9  | Detected | 24130.1  | Detected | 34871    | Detected | 32591    | Detected   | Tsen34   | 0.926725793 | 0.99155764 | 1.35063676 | 1.4451246 |
| A_55_P1990 | 13905.6  | Detected | 12930.9  | Detected | 12006.6  | Detected | 12886    | Detected   | Ppp3r1   | 0.926677022 | 0.86343631 | 0.9965277  | 0.9285201 |
| A_51_P4325 | 3985.9   | Detected | 3237.7   | Detected | 3196.3   | Detected | 3693.6   | Detected   | Tlr9     | 0.926666499 | 0.8019017  | 1.14080983 | 0.9872131 |
| A_55_P2126 | 13214.4  | Detected | 12180.8  | Detected | 17622.7  | Detected | 12243.8  | Detected   | Fam53c   | 0.926549824 | 1.3335982  | 1.00517207 | 1.4467605 |
| A_55_P2041 | 6670.4   | Detected | 7670     | Detected | 6311.3   | Detected | 6179.7   | Detected   | Tyw5     | 0.926436196 | 0.94616515 | 0.80569752 | 0.8228553 |
| A_52_P2004 | 3245.2   | Detected | 2734.5   | Detected | 2614.1   | Detected | 3006.2   | Detected   | Tcf12    | 0.926352767 | 0.80552816 | 1.09936003 | 0.95597   |
| A_55_P2034 | 194      | Detected | 281.6    | Detected | 129.6    | Detected | 179.7    | Detected   | Rasal2   | 0.92628866  | 0.66804124 | 0.6381392  | 0.4602273 |
| A_55_P2009 | 13219    | Detected | 12690.1  | Detected | 11817.9  | Detected | 12244.6  | Detected   | Sumo2    | 0.926287919 | 0.89400862 | 0.96489389 | 0.9312693 |
| A_55_P2002 | 1574.9   | Detected | 1094.1   | Detected | 814.1    | Detected | 1458.7   | Detected   | Tnrc18   | 0.926217538 | 0.51692171 | 1.33324193 | 0.7440819 |
| A_55_P2370 | 69.1     | Detected | 66.6     | Detected | 63.1     | Detected | 64       | Detected   | Syn3     | 0.926193922 | 0.91316932 | 0.96096096 | 0.9474474 |
| A_55_P1965 | 4401.8   | Detected | 3137.8   | Detected | 3936.3   | Detected | 4076.9   | Detected   | Pi4k2a   | 0.926189286 | 0.89424781 | 1.29928612 | 1.2544777 |
| A_55_P2073 | 81661.3  | Detected | 89711.5  | Detected | 94729.4  | Detected | 75633.8  | Detected   | Gm4832   | 0.926189027 | 1.16002807 | 0.84307809 | 1.0559337 |
| A_51_P4694 | 431.4    | Detected | 374.2    | Detected | 347.7    | Detected | 399.5    | Detected   | Yes1     | 0.926054706 | 0.80598053 | 1.0676109  | 0.9291823 |
| A_51_P1181 | 3100.7   | Detected | 2106.1   | Detected | 3005.3   | Detected | 2871.4   | Detected   | Zbtb43   | 0.926048957 | 0.96923275 | 1.36337306 | 1.4269503 |
| A_51_P1813 | 80243.1  | Detected | 65981.9  | Detected | 89043.6  | Detected | 74304.5  | Detected   | Usmg5    | 0.925992391 | 1.10967298 | 1.12613459 | 1.3495155 |
| A_55_P1977 | 905.8    | Detected | 800.5    | Detected | 867.5    | Detected | 838.7    | Detected   | Zbtb1    | 0.925921837 | 0.95771694 | 1.04772017 | 1.0836977 |
| A_51_P2586 | 2552.2   | Detected | 1894.1   | Detected | 3105     | Detected | 2362.9   | Detected   | Rab4b    | 0.925828697 | 1.21659745 | 1.24750541 | 1.639301  |
| A_55_P2137 | 129.4    | Detected | 74.6     | Detected | 97.6     | Detected | 119.8    | Detected   | Trem14   | 0.925811437 | 0.75425039 | 1.60589812 | 1.308311  |
| A_55_P1990 | 256560   | Detected | 266445.2 | Detected | 267188.8 | Detected | 237504.2 | Detected   | Rpl15    | 0.925725756 | 1.04142813 | 0.89138104 | 1.0027908 |
| A_55_P1984 | 188125   | Detected | 184965.3 | Detected | 200815.5 | Detected | 174127.7 | Detected   | Nme2     | 0.925595748 | 1.06745781 | 0.94140739 | 1.0856928 |
| A_55_P2016 | 113225.2 | Detected | 106925.4 | Detected | 122907.5 | Detected | 104795.1 | Detected   | Rpl27a   | 0.925545727 | 1.08551365 | 0.98007676 | 1.1494696 |
| A_55_P2015 | 3269.7   | Detected | 2749.6   | Detected | 3257.1   | Detected | 3026.2   | Detected   | Rif1     | 0.925528336 | 0.99614644 | 1.10059645 | 1.1845723 |
| A_66_P1156 | 88.6     | Detected | 241.5    | Detected | 55.4     | Detected | 82       | Detected   | Rnf207   | 0.925507901 | 0.62528217 | 0.33954451 | 0.2293996 |
| A_52_P3852 | 698      | Detected | 452.1    | Detected | 673.5    | Detected | 646      | Detected   | Harbi1   | 0.925501433 | 0.96489971 | 1.42888741 | 1.4897147 |
| A_55_P2139 | 25.5     | Detected | 28.2     | Detected | 18.5     | Detected | 23.6     | Not Detect | Krtap5-4 | 0.925490196 | 0.7254902  | 0.83687943 | 0.6560284 |
| A_66_P1304 | 238.8    | Detected | 196.6    | Detected | 170.7    | Detected | 221      | Detected   | Arsb     | 0.925460637 | 0.71482412 | 1.12410987 | 0.8682604 |
| A_55_P1956 | 822      | Detected | 712.6    | Detected | 655.3    | Detected | 760.7    | Detected   | Egfr     | 0.925425791 | 0.79720195 | 1.0674993  | 0.9195902 |
| A_55_P2318 | 85.8     | Detected | 77.6     | Detected | 100.8    | Detected | 79.4     | Detected   | Uvssa    | 0.925407925 | 1.17482517 | 1.02319588 | 1.2989691 |
| A_51_P3660 | 6111.7   | Detected | 5900     | Detected | 7526     | Detected | 5655.5   | Detected   | Ercc3    | 0.925356284 | 1.23140861 | 0.95855932 | 1.2755932 |
| A_55_P2027 | 6945.6   | Detected | 7174     | Detected | 7301.5   | Detected | 6427     | Detected   | Gm3258   | 0.925334024 | 1.05124107 | 0.89587399 | 1.0177725 |
| A_55_P1967 | 21.4     | Detected | 28.5     | Detected | 30.5     | Detected | 19.8     | Not Detect | Hunk     | 0.925233645 | 1.42523364 | 0.69473684 | 1.0701754 |
| A_52_P1274 | 294.1    | Detected | 194.3    | Detected | 254.2    | Detected | 272.1    | Detected   | Caprin1  | 0.925195512 | 0.86433186 | 1.40041173 | 1.3082862 |
| A_52_P2892 | 4308.2   | Detected | 2552.2   | Detected | 3825.1   | Detected | 3985.8   | Detected   | Arid1b   | 0.925165963 | 0.887865   | 1.56171146 | 1.4987462 |
| A_55_P2084 | 658.7    | Detected | 560.5    | Detected | 716.1    | Detected | 609.4    | Detected   | Rnf135   | 0.92515561  | 1.08714134 | 1.08724353 | 1.2776093 |



|            |          |          |          |            |          |            |          |            |               |             |            |            |           |
|------------|----------|----------|----------|------------|----------|------------|----------|------------|---------------|-------------|------------|------------|-----------|
| A_55_P2109 | 15420.9  | Detected | 12005.5  | Detected   | 14342.1  | Detected   | 14266.3  | Detected   | Kif20b        | 0.925127587 | 0.93004299 | 1.18831369 | 1.1946275 |
| A_55_P2015 | 293171.3 | Detected | 250870.7 | Detected   | 307317.8 | Detected   | 271202.6 | Detected   | Gm5766        | 0.925065312 | 1.04825336 | 1.08104534 | 1.2250048 |
| A_55_P2056 | 5297.5   | Detected | 5113.5   | Detected   | 5317.4   | Detected   | 4900.3   | Detected   | Pus1          | 0.925021236 | 1.00375649 | 0.95830644 | 1.0398748 |
| A_52_P9123 | 21264.6  | Detected | 20155.3  | Detected   | 20648.2  | Detected   | 19669.1  | Detected   | Ccni          | 0.924969198 | 0.97101286 | 0.97587731 | 1.0244551 |
| A_55_P2085 | 1135.2   | Detected | 986.2    | Detected   | 1495.9   | Detected   | 1050     | Detected   | Atg12         | 0.924947146 | 1.31774137 | 1.06469276 | 1.5168323 |
| A_55_P2078 | 199.8    | Detected | 182.8    | Detected   | 202.3    | Detected   | 184.8    | Detected   | Mettl5        | 0.924924925 | 1.01251251 | 1.01094092 | 1.106674  |
| A_55_P1962 | 8601.5   | Detected | 7429.5   | Detected   | 8410.9   | Detected   | 7955.2   | Detected   | Mff           | 0.924861943 | 0.97784107 | 1.07075846 | 1.132095  |
| A_51_P4256 | 28773.4  | Detected | 23982.4  | Detected   | 35820.5  | Detected   | 26610    | Detected   | Mad211bp      | 0.9248125   | 1.24491718 | 1.10956368 | 1.4936162 |
| A_55_P2030 | 9254.8   | Detected | 9262.4   | Detected   | 8913.5   | Detected   | 8558.3   | Detected   | Srsf2         | 0.924741756 | 0.96312184 | 0.92398298 | 0.9623316 |
| A_55_P1974 | 33178.9  | Detected | 28769.7  | Detected   | 33807.3  | Detected   | 30676    | Detected   | Ict1          | 0.924563503 | 1.01893975 | 1.06626068 | 1.1751009 |
| A_55_P2048 | 139963   | Detected | 134982   | Detected   | 146952.8 | Detected   | 129402.4 | Detected   | Rpl27         | 0.924547202 | 1.04994034 | 0.95866412 | 1.0886844 |
| A_55_P2339 | 15.9     | Detected | 15.2     | Not Detect | 14.5     | Not Detect | 14.7     | Not Detect | 1700010B13Rik | 0.924528302 | 0.91194969 | 0.96710526 | 0.9539474 |
| A_55_P1993 | 9291.8   | Detected | 9013     | Detected   | 9090.3   | Detected   | 8590.5   | Detected   | Celf1         | 0.92452485  | 0.97831421 | 0.95312327 | 1.0085765 |
| A_51_P4860 | 1363.2   | Detected | 1355.9   | Detected   | 1025.6   | Detected   | 1260.3   | Detected   | Zfp280b       | 0.924515845 | 0.75234742 | 0.92949333 | 0.756398  |
| A_55_P1997 | 61412.4  | Detected | 49192.4  | Detected   | 58468.9  | Detected   | 56774.6  | Detected   | Xpnppe1       | 0.924481049 | 0.95206994 | 1.15413357 | 1.1885759 |
| A_55_P2017 | 352      | Detected | 485.6    | Detected   | 188.3    | Detected   | 325.4    | Detected   | Tlcl1         | 0.924431818 | 0.53494318 | 0.67009885 | 0.3877677 |
| A_55_P2024 | 56.9     | Detected | 78.7     | Detected   | 49.1     | Detected   | 52.6     | Not Detect | Gm7104        | 0.924428822 | 0.8629174  | 0.66836086 | 0.6238882 |
| A_55_P2043 | 1350.2   | Detected | 1117.4   | Detected   | 1228.1   | Detected   | 1248.1   | Detected   | 2610020H08Rik | 0.924381573 | 0.90956895 | 1.11696796 | 1.0990693 |
| A_55_P2181 | 284068.1 | Detected | 266238.2 | Detected   | 287361.9 | Detected   | 262584.5 | Detected   | Gm10653       | 0.924371656 | 1.01159511 | 0.98627657 | 1.0793414 |
| A_52_P5519 | 2047.4   | Detected | 1600.2   | Detected   | 1727.9   | Detected   | 1892.1   | Detected   | BC005537      | 0.9241477   | 0.84394842 | 1.1824147  | 1.0798025 |
| A_51_P4534 | 7184.9   | Detected | 9521     | Detected   | 5790.3   | Detected   | 6639.9   | Detected   | 2310044G17Rik | 0.924146474 | 0.80589848 | 0.69739523 | 0.6081609 |
| A_66_P1060 | 717      | Detected | 497.4    | Detected   | 750.5    | Detected   | 662.6    | Detected   | Orai1         | 0.924128312 | 1.04672245 | 1.33212706 | 1.508846  |
| A_51_P1740 | 97300.5  | Detected | 88796.5  | Detected   | 97988.2  | Detected   | 89915.8  | Detected   | Slc39a7       | 0.924104193 | 1.0070678  | 1.01260523 | 1.1035142 |
| A_55_P2144 | 136.9    | Detected | 97.7     | Detected   | 82.5     | Detected   | 126.5    | Detected   | Gm4354        | 0.92403214  | 0.60262966 | 1.29477994 | 0.8444217 |
| A_55_P2108 | 2302.1   | Detected | 1969.8   | Detected   | 2095.4   | Detected   | 2127.1   | Detected   | Dgcr8         | 0.923982451 | 0.91021241 | 1.07985582 | 1.0637628 |
| A_55_P1999 | 1273.1   | Detected | 957.3    | Detected   | 1105.8   | Detected   | 1176.3   | Detected   | Cdk12         | 0.923965124 | 0.86858848 | 1.22876841 | 1.1551238 |
| A_55_P2146 | 242028.1 | Detected | 237617.6 | Detected   | 273316.9 | Detected   | 223622.3 | Detected   | LOC101056544  | 0.923951806 | 1.12927755 | 0.94110159 | 1.1502385 |
| A_55_P1991 | 18.4     | Detected | 36.2     | Detected   | 8.4      | Not Detect | 17       | Not Detect | Samt2         | 0.923913043 | 0.45652174 | 0.46961326 | 0.2320442 |
| A_55_P2013 | 8289.6   | Detected | 6392.2   | Detected   | 6800     | Detected   | 7657.9   | Detected   | Melk          | 0.923796082 | 0.82030496 | 1.19800695 | 1.0637965 |
| A_52_P1068 | 151.8    | Detected | 134.9    | Detected   | 222.8    | Detected   | 140.2    | Detected   | Dmxl1         | 0.923583663 | 1.46772069 | 1.03928836 | 1.6515938 |
| A_51_P4165 | 2540.4   | Detected | 3048.2   | Detected   | 2386.3   | Detected   | 2345.7   | Detected   | Hist1h1a      | 0.923358526 | 0.93934026 | 0.76953612 | 0.7828555 |
| A_55_P1958 | 28.7     | Detected | 32.2     | Detected   | 31.5     | Detected   | 26.5     | Not Detect | Bcl11a        | 0.923344948 | 1.09756098 | 0.82298137 | 0.9782609 |
| A_55_P2072 | 20060.1  | Detected | 15463.6  | Detected   | 21680.8  | Detected   | 18521.4  | Detected   | Cdk9          | 0.923295497 | 1.08079222 | 1.19774179 | 1.4020539 |
| A_55_P2145 | 1548.7   | Detected | 1383.9   | Detected   | 1631.7   | Detected   | 1429.9   | Detected   | Swt1          | 0.923290502 | 1.05359334 | 1.0332394  | 1.1790592 |
| A_55_P1989 | 3025.9   | Detected | 2299.4   | Detected   | 2492.4   | Detected   | 2793.5   | Detected   | Thrap3        | 0.923196404 | 0.82368882 | 1.21488214 | 1.0839349 |
| A_55_P2085 | 960.8    | Detected | 1525.8   | Detected   | 804.7    | Detected   | 887      | Detected   | Ophn1         | 0.923189009 | 0.83753122 | 0.58133438 | 0.5273955 |
| A_55_P2051 | 450823.7 | Detected | 429139.8 | Detected   | 461996.4 | Detected   | 416164.3 | Detected   | Rps10         | 0.923119836 | 1.02478286 | 0.96976393 | 1.0765639 |
| A_55_P2147 | 220043.2 | Detected | 239864.3 | Detected   | 236292.8 | Detected   | 203095.9 | Detected   | Gm13215       | 0.922981942 | 1.07384732 | 0.84671166 | 0.9851103 |
| A_55_P2121 | 5997.6   | Detected | 5974.8   | Detected   | 7400.9   | Detected   | 5535.6   | Detected   | Adi1          | 0.922969188 | 1.23397692 | 0.92649126 | 1.2386858 |
| A_52_P2356 | 88.1     | Detected | 57.4     | Detected   | 61.2     | Detected   | 81.3     | Detected   | 4933413J09Rik | 0.922814983 | 0.69466515 | 1.41637631 | 1.0662021 |

|            |          |            |          |            |          |          |          |            |               |             |            |            |           |
|------------|----------|------------|----------|------------|----------|----------|----------|------------|---------------|-------------|------------|------------|-----------|
| A_55_P2070 | 326963.8 | Detected   | 287672.1 | Detected   | 326790.9 | Detected | 301722.3 | Detected   | Rpl14         | 0.922800322 | 0.9994712  | 1.04884102 | 1.135984  |
| A_55_P1961 | 249.9    | Detected   | 229.9    | Detected   | 159.6    | Detected | 230.6    | Detected   | Plagl1        | 0.922769108 | 0.63865546 | 1.0030448  | 0.6942149 |
| A_55_P2020 | 980.8    | Detected   | 704.5    | Detected   | 862.1    | Detected | 905      | Detected   | Zbtb7b        | 0.92271615  | 0.87897635 | 1.28459901 | 1.2237048 |
| A_52_P6573 | 20821.5  | Detected   | 18797.5  | Detected   | 21516.4  | Detected | 19211.6  | Detected   | Mrps17        | 0.922680883 | 1.03337416 | 1.02202953 | 1.1446416 |
| A_66_P1349 | 640.1    | Detected   | 664.1    | Detected   | 575.3    | Detected | 590.6    | Detected   | Ttc19         | 0.922668333 | 0.89876582 | 0.8893239  | 0.8662852 |
| A_55_P2031 | 1189.5   | Detected   | 930.2    | Detected   | 1184.2   | Detected | 1097.4   | Detected   | Crebzf        | 0.922572509 | 0.99554435 | 1.17974629 | 1.2730596 |
| A_55_P2016 | 59326    | Detected   | 23824.4  | Detected   | 65585.1  | Detected | 54728.1  | Detected   | Ncoa4         | 0.922497724 | 1.10550349 | 2.29714494 | 2.7528542 |
| A_55_P2149 | 624      | Detected   | 742.5    | Detected   | 449.2    | Detected | 575.5    | Detected   | Dtx3          | 0.922275641 | 0.71987179 | 0.77508418 | 0.6049832 |
| A_51_P3215 | 706.5    | Detected   | 888.9    | Detected   | 347.3    | Detected | 651.5    | Detected   | Purg          | 0.922151451 | 0.4915782  | 0.73292834 | 0.3907076 |
| A_55_P2062 | 77       | Detected   | 48.2     | Detected   | 156      | Detected | 71       | Detected   | Gm4924        | 0.922077922 | 2.02597403 | 1.47302905 | 3.2365145 |
| A_66_P1258 | 5996.4   | Detected   | 5979.2   | Detected   | 4514.7   | Detected | 5528.9   | Detected   | Pnn           | 0.922036555 | 0.75290174 | 0.92468892 | 0.7550676 |
| A_55_P1999 | 4229.1   | Detected   | 2727.7   | Detected   | 2595     | Detected | 3898.9   | Detected   | Dip2a         | 0.921921922 | 0.61360573 | 1.42937273 | 0.951351  |
| A_52_P4915 | 71.7     | Detected   | 56.4     | Detected   | 74.4     | Detected | 66.1     | Detected   | Zfp759        | 0.921896792 | 1.0376569  | 1.17198582 | 1.3191489 |
| A_66_P1264 | 132331.8 | Detected   | 131380.1 | Detected   | 105995.2 | Detected | 121989.1 | Detected   | Eif1          | 0.921842671 | 0.80098057 | 0.92852038 | 0.8067828 |
| A_51_P3750 | 1317.6   | Detected   | 1281.9   | Detected   | 1156.2   | Detected | 1214.6   | Detected   | Lmbrd2        | 0.921827565 | 0.87750455 | 0.9474998  | 0.9019424 |
| A_51_P3662 | 89.5     | Detected   | 100.6    | Detected   | 107.3    | Detected | 82.5     | Detected   | Zfp799        | 0.921787709 | 1.19888268 | 0.82007952 | 1.0666004 |
| A_55_P2136 | 30140.3  | Detected   | 43250.9  | Detected   | 32925.3  | Detected | 27778.9  | Detected   | Cd99          | 0.921653069 | 1.0924012  | 0.64227334 | 0.7612628 |
| A_55_P2081 | 332503.1 | Detected   | 326328.5 | Detected   | 325178.2 | Detected | 306451.2 | Detected   | Rpl7          | 0.921649152 | 0.97797043 | 0.93908807 | 0.996475  |
| A_55_P2110 | 12480.8  | Detected   | 10794.6  | Detected   | 15068.7  | Detected | 11502.9  | Detected   | Tm2d3         | 0.921647651 | 1.20735049 | 1.06561614 | 1.395948  |
| A_55_P2089 | 22553.6  | Detected   | 22965.2  | Detected   | 19035    | Detected | 20786.2  | Detected   | Xpo1          | 0.92163557  | 0.84398943 | 0.90511731 | 0.8288628 |
| A_51_P3095 | 3079.9   | Detected   | 3322.4   | Detected   | 2550.6   | Detected | 2838.3   | Detected   | Pex14         | 0.921555895 | 0.82814377 | 0.85429208 | 0.767698  |
| A_51_P3026 | 8076.4   | Detected   | 5604.2   | Detected   | 7293.4   | Detected | 7442.3   | Detected   | Topbp1        | 0.921487296 | 0.90305086 | 1.32798615 | 1.3014168 |
| A_51_P4626 | 37606.9  | Detected   | 35366.1  | Detected   | 35207.6  | Detected | 34654.1  | Detected   | Ptbp1         | 0.921482494 | 0.93620054 | 0.97986773 | 0.9955183 |
| A_52_P5033 | 67.4     | Detected   | 44.9     | Detected   | 58.5     | Detected | 62.1     | Detected   | Dcun1d3       | 0.921364985 | 0.86795252 | 1.3830735  | 1.3028953 |
| A_55_P1991 | 194.3    | Detected   | 162.7    | Detected   | 131      | Detected | 179      | Detected   | Stat3         | 0.92125579  | 0.67421513 | 1.10018439 | 0.8051629 |
| A_52_P1759 | 1116.6   | Detected   | 1021     | Detected   | 938.2    | Detected | 1028.6   | Detected   | Map3k7        | 0.921189325 | 0.84022927 | 1.00744368 | 0.918903  |
| A_51_P3566 | 60.9     | Detected   | 73.7     | Detected   | 60.7     | Detected | 56.1     | Detected   | Shc4          | 0.921182266 | 0.99671593 | 0.76119403 | 0.8236092 |
| A_52_P6370 | 158.4    | Detected   | 201.3    | Detected   | 146      | Detected | 145.9    | Detected   | Fam49b        | 0.921085859 | 0.92171717 | 0.72478887 | 0.7252856 |
| A_51_P1277 | 10319.5  | Detected   | 13091    | Detected   | 10370.5  | Detected | 9505     | Detected   | Ddx20         | 0.921071757 | 1.0049421  | 0.72607135 | 0.7921855 |
| A_52_P4580 | 6555.3   | Detected   | 6127.1   | Detected   | 7899.5   | Detected | 6037.9   | Detected   | AI467606      | 0.921071499 | 1.20505545 | 0.98544173 | 1.2892722 |
| A_52_P1616 | 4735.8   | Detected   | 3801     | Detected   | 4220.4   | Detected | 4362     | Detected   | St6gal1       | 0.921069302 | 0.89116939 | 1.14759274 | 1.1103394 |
| A_51_P2424 | 15.2     | Detected   | 11.3     | Not Detect | 25.7     | Detected | 14       | Not Detect | Prss42        | 0.921052632 | 1.69078947 | 1.23893805 | 2.2743363 |
| A_55_P2212 | 11.4     | Not Detect | 15.4     | Not Detect | 51.8     | Detected | 10.5     | Not Detect | 4933435G04Rik | 0.921052632 | 4.54385965 | 0.68181818 | 3.3636364 |
| A_66_P1220 | 59774    | Detected   | 65013.1  | Detected   | 55728.1  | Detected | 55054.3  | Detected   | Zfp622        | 0.921040921 | 0.93231338 | 0.84681856 | 0.8571826 |
| A_55_P1984 | 124.1    | Detected   | 87.1     | Detected   | 94.9     | Detected | 114.3    | Detected   | Depdc5        | 0.921031426 | 0.76470588 | 1.31228473 | 1.0895522 |
| A_55_P1990 | 4194.7   | Detected   | 2547.3   | Detected   | 3139.1   | Detected | 3862.6   | Detected   | Osbpl11       | 0.920828665 | 0.74834911 | 1.51635065 | 1.2323244 |
| A_52_P6181 | 640.3    | Detected   | 577      | Detected   | 635.7    | Detected | 589.6    | Detected   | Manea         | 0.920818366 | 0.99281587 | 1.02183709 | 1.1017331 |
| A_51_P4661 | 95543.8  | Detected   | 102898   | Detected   | 100258.9 | Detected | 87974.7  | Detected   | C1qbp         | 0.920778742 | 1.04935014 | 0.85496997 | 0.9743523 |
| A_51_P1481 | 39699.3  | Detected   | 33230.2  | Detected   | 39265    | Detected | 36552.5  | Detected   | Sdf2          | 0.920734119 | 0.98906026 | 1.09997833 | 1.1816059 |
| A_51_P3088 | 2605.1   | Detected   | 2371.3   | Detected   | 2192.1   | Detected | 2398.6   | Detected   | Toe1          | 0.92073241  | 0.84146482 | 1.01151267 | 0.9244296 |

|            |                   |                   |                  |                   |               |             |            |            |           |
|------------|-------------------|-------------------|------------------|-------------------|---------------|-------------|------------|------------|-----------|
| A_66_P1301 | 653.4 Detected    | 474.2 Detected    | 598.5 Detected   | 601.6 Detected    | Fads2         | 0.920722375 | 0.91597796 | 1.26866301 | 1.2621257 |
| A_52_P5294 | 8144.4 Detected   | 9379.3 Detected   | 7467.8 Detected  | 7497.8 Detected   | Wdr77         | 0.920608025 | 0.91692451 | 0.79939868 | 0.7962001 |
| A_51_P4195 | 7143.7 Detected   | 6904.5 Detected   | 8408.6 Detected  | 6574.6 Detected   | Polr2d        | 0.9203354   | 1.17706511 | 0.95221957 | 1.2178434 |
| A_51_P2716 | 5279.5 Detected   | 4120.5 Detected   | 3275.5 Detected  | 4858.8 Detected   | Rev3l         | 0.920314424 | 0.6204186  | 1.17917728 | 0.7949278 |
| A_55_P2052 | 153.1 Detected    | 95.3 Detected     | 69.1 Detected    | 140.9 Detected    | Cask          | 0.920313521 | 0.45133899 | 1.47848898 | 0.7250787 |
| A_55_P1955 | 2727.6 Detected   | 2777.1 Detected   | 3001 Detected    | 2510.1 Detected   | Alg6          | 0.920259569 | 1.10023464 | 0.90385654 | 1.0806237 |
| A_55_P2032 | 13002.8 Detected  | 10649.7 Detected  | 11362.4 Detected | 11964.6 Detected  | Brap          | 0.920155659 | 0.87384256 | 1.12346827 | 1.0669221 |
| A_55_P1981 | 231.5 Detected    | 189.8 Detected    | 314.8 Detected   | 213 Detected      | Trub2         | 0.920086393 | 1.35982721 | 1.12223393 | 1.658588  |
| A_52_P6756 | 1475.8 Detected   | 1404.1 Detected   | 1662.9 Detected  | 1357.8 Detected   | Agbl3         | 0.920043366 | 1.1267787  | 0.96702514 | 1.1843174 |
| A_55_P1976 | 82.5 Detected     | 70.4 Detected     | 69.9 Detected    | 75.9 Detected     | Gimap4        | 0.92        | 0.84727273 | 1.078125   | 0.9928977 |
| A_55_P2188 | 20 Detected       | 26.9 Detected     | 21.3 Detected    | 18.4 Not Detect   | 4930594M17Rik | 0.92        | 1.065      | 0.68401487 | 0.7918216 |
| A_51_P2791 | 43968.6 Detected  | 32059.1 Detected  | 48235.1 Detected | 40449.4 Detected  | Fam173a       | 0.919961063 | 1.09703516 | 1.26171352 | 1.5045681 |
| A_52_P2581 | 605.6 Detected    | 505.3 Detected    | 385.8 Detected   | 557.1 Detected    | Prdm2         | 0.919914135 | 0.63705416 | 1.10251336 | 0.7635068 |
| A_52_P5891 | 6567.6 Detected   | 3595.3 Detected   | 4594 Detected    | 6041.6 Detected   | 201011101Rik  | 0.919909861 | 0.69949449 | 1.6804161  | 1.2777793 |
| A_55_P2455 | 2469.5 Detected   | 2343.5 Detected   | 1870.3 Detected  | 2271.7 Detected   | Klhl20        | 0.919902814 | 0.75735979 | 0.96936207 | 0.7980798 |
| A_51_P1067 | 113.6 Detected    | 141.1 Detected    | 150 Detected     | 104.5 Detected    | Rnmt          | 0.919894366 | 1.32042254 | 0.7406095  | 1.0630758 |
| A_55_P2101 | 601.3 Detected    | 524.1 Detected    | 817.7 Detected   | 553.1 Detected    | Nubpl         | 0.919840346 | 1.35988691 | 1.05533295 | 1.5601984 |
| A_55_P2147 | 810.8 Detected    | 630.3 Detected    | 712.6 Detected   | 745.8 Detected    | Cyth3         | 0.919832264 | 0.87888505 | 1.18324607 | 1.1305727 |
| A_55_P2112 | 891.4 Detected    | 654.6 Detected    | 865.2 Detected   | 819.9 Detected    | Diap1         | 0.919789096 | 0.97060803 | 1.25252062 | 1.3217232 |
| A_55_P2180 | 209834.8 Detected | 196004.1 Detected | 215703 Detected  | 192997.4 Detected | Rpl31         | 0.919758782 | 1.02796581 | 0.98466001 | 1.1005025 |
| A_66_P1368 | 26666.4 Detected  | 22502.5 Detected  | 27751.5 Detected | 24525.9 Detected  | Nadk          | 0.919730447 | 1.04069166 | 1.0899189  | 1.233263  |
| A_55_P2107 | 27.4 Detected     | 23.8 Detected     | 14 Not Detect    | 25.2 Not Detect   | Nol9          | 0.919708029 | 0.51094891 | 1.05882353 | 0.5882353 |
| A_52_P6949 | 686.2 Detected    | 607.5 Detected    | 573.8 Detected   | 631.1 Detected    | Zfp933        | 0.919702711 | 0.83619936 | 1.03884774 | 0.9445267 |
| A_55_P2085 | 121.9 Detected    | 125.6 Detected    | 96.8 Detected    | 112.1 Detected    | Supt6         | 0.919606235 | 0.79409352 | 0.89251592 | 0.7707006 |
| A_51_P1062 | 1108.1 Detected   | 1131 Detected     | 1332.2 Detected  | 1019 Detected     | Camk1         | 0.919592095 | 1.20223807 | 0.90097259 | 1.1778957 |
| A_55_P1956 | 30599.9 Detected  | 28632.2 Detected  | 28249.8 Detected | 28138.8 Detected  | Med28         | 0.919571633 | 0.9231991  | 0.98276765 | 0.9866444 |
| A_52_P4757 | 304.6 Detected    | 240.1 Detected    | 255.6 Detected   | 280.1 Detected    | Nln           | 0.919566645 | 0.83913329 | 1.16659725 | 1.0645564 |
| A_55_P1994 | 26.1 Detected     | 24 Detected       | 41.2 Detected    | 24 Not Detect     | Rorc          | 0.91954023  | 1.57854406 | 1          | 1.7166667 |
| A_55_P2004 | 295.8 Detected    | 287.3 Detected    | 253.9 Detected   | 272 Detected      | Cd300lf       | 0.91954023  | 0.85835024 | 0.94674556 | 0.8837452 |
| A_55_P2012 | 206.3 Detected    | 162.7 Detected    | 167.4 Detected   | 189.7 Detected    | Rnf167        | 0.919534658 | 0.81143965 | 1.1659496  | 1.0288875 |
| A_55_P2064 | 5497.2 Detected   | 4004.5 Detected   | 3690.1 Detected  | 5054.7 Detected   | Rapgef2       | 0.919504475 | 0.67126901 | 1.26225496 | 0.9214883 |
| A_55_P2122 | 1332.9 Detected   | 1109 Detected     | 1114.7 Detected  | 1225.6 Detected   | Kcnk4         | 0.919498837 | 0.8362968  | 1.10513977 | 1.0051398 |
| A_55_P2065 | 2821.7 Detected   | 3207 Detected     | 2593.9 Detected  | 2594.5 Detected   | Rbm26         | 0.919481164 | 0.91926853 | 0.80901154 | 0.8088244 |
| A_55_P2179 | 1108 Detected     | 1016.6 Detected   | 1122.3 Detected  | 1018.7 Detected   | Lig3          | 0.919404332 | 1.01290614 | 1.00206571 | 1.103974  |
| A_52_P2632 | 2155.5 Detected   | 2171.1 Detected   | 2248.1 Detected  | 1981.7 Detected   | Tmem33        | 0.919369056 | 1.04295987 | 0.91276312 | 1.0354659 |
| A_55_P1956 | 327969.9 Detected | 276034.3 Detected | 348664 Detected  | 301517.7 Detected | Rpl24         | 0.919345647 | 1.06309756 | 1.09231969 | 1.2631184 |
| A_55_P1982 | 153.7 Detected    | 136.8 Detected    | 135.4 Detected   | 141.3 Detected    | Vmn1r204      | 0.919323357 | 0.88093689 | 1.03289474 | 0.9897661 |
| A_51_P3631 | 6055.1 Detected   | 4772.5 Detected   | 7081.6 Detected  | 5566.5 Detected   | Blvra         | 0.919307691 | 1.16952651 | 1.16636983 | 1.4838345 |
| A_55_P2172 | 5263.2 Detected   | 5805 Detected     | 4362.5 Detected  | 4838.3 Detected   | Nup155        | 0.919269646 | 0.82886837 | 0.83347115 | 0.7515073 |
| A_52_P3883 | 54.5 Detected     | 60.7 Detected     | 50.4 Detected    | 50.1 Detected     | Prdx6         | 0.919266055 | 0.92477064 | 0.82537068 | 0.830313  |

|            |         |          |         |            |         |            |         |            |               |             |            |            |           |
|------------|---------|----------|---------|------------|---------|------------|---------|------------|---------------|-------------|------------|------------|-----------|
| A_52_P2352 | 302.2   | Detected | 299.5   | Detected   | 260.3   | Detected   | 277.8   | Detected   | Fntb          | 0.919258769 | 0.8613501  | 0.92754591 | 0.8691152 |
| A_52_P5697 | 466.8   | Detected | 330.4   | Detected   | 352.8   | Detected   | 429.1   | Detected   | Mphosph9      | 0.919237361 | 0.75578406 | 1.29872881 | 1.0677966 |
| A_55_P2165 | 33.4    | Detected | 25.8    | Detected   | 26.8    | Detected   | 30.7    | Not Detect | Ankrd42       | 0.919161677 | 0.80239521 | 1.18992248 | 1.0387597 |
| A_51_P1431 | 86418.8 | Detected | 75694.2 | Detected   | 91504.9 | Detected   | 79431   | Detected   | Mrpl12        | 0.91914028  | 1.05885409 | 1.04936706 | 1.208876  |
| A_55_P1953 | 258.3   | Detected | 194.4   | Detected   | 228.5   | Detected   | 237.4   | Detected   | Luc7l2        | 0.919086334 | 0.88463027 | 1.22119342 | 1.1754115 |
| A_51_P1707 | 11630.6 | Detected | 12278.7 | Detected   | 12054.7 | Detected   | 10688.9 | Detected   | Grwd1         | 0.919032552 | 1.03646415 | 0.87052375 | 0.981757  |
| A_52_P3672 | 125.9   | Detected | 152.7   | Detected   | 87.7    | Detected   | 115.7   | Detected   | Fsd1l         | 0.91898332  | 0.69658459 | 0.75769483 | 0.5743287 |
| A_66_P1180 | 18029.1 | Detected | 15672.9 | Detected   | 17542.4 | Detected   | 16568.1 | Detected   | Rab3ip        | 0.918964341 | 0.97300475 | 1.0571177  | 1.1192823 |
| A_55_P2011 | 37      | Detected | 34.1    | Detected   | 34.8    | Detected   | 34      | Not Detect | Pdzk1         | 0.918918919 | 0.94054054 | 0.99706745 | 1.0205279 |
| A_55_P2162 | 67.8    | Detected | 52.6    | Detected   | 61.8    | Detected   | 62.3    | Detected   | Nit1          | 0.918879056 | 0.91150442 | 1.18441065 | 1.1749049 |
| A_55_P2064 | 3023.4  | Detected | 2663.7  | Detected   | 2570.4  | Detected   | 2778    | Detected   | Cdc27         | 0.918833102 | 0.85016868 | 1.04291024 | 0.9649735 |
| A_52_P3190 | 27.1    | Detected | 16.8    | Not Detect | 19.4    | Detected   | 24.9    | Not Detect | Mex3b         | 0.918819188 | 0.71586716 | 1.48214286 | 1.1547619 |
| A_55_P2013 | 34495.6 | Detected | 30163.9 | Detected   | 27043.3 | Detected   | 31691.7 | Detected   | Ddx3x         | 0.91871717  | 0.78396375 | 1.05064995 | 0.8965452 |
| A_51_P1293 | 13314.2 | Detected | 12266.5 | Detected   | 13007   | Detected   | 12229.8 | Detected   | Mob4          | 0.918553124 | 0.97692689 | 0.99700811 | 1.0603677 |
| A_51_P1609 | 3215.2  | Detected | 2212.2  | Detected   | 2866.1  | Detected   | 2953.2  | Detected   | Morc3         | 0.918512068 | 0.891422   | 1.33496067 | 1.2955881 |
| A_51_P4651 | 67321.8 | Detected | 63722.7 | Detected   | 64767   | Detected   | 61832.8 | Detected   | Ctsb          | 0.918466232 | 0.96205093 | 0.97034181 | 1.0163882 |
| A_66_P1298 | 83.2    | Detected | 58.9    | Detected   | 71.2    | Detected   | 76.4    | Detected   | 1700047M11Rik | 0.918269231 | 0.85576923 | 1.29711375 | 1.2088285 |
| A_51_P2235 | 1738.7  | Detected | 1132.3  | Detected   | 1507.3  | Detected   | 1596.5  | Detected   | Tbc1d23       | 0.918214758 | 0.86691206 | 1.40996202 | 1.3311843 |
| A_51_P4744 | 33837.1 | Detected | 33252.7 | Detected   | 36671   | Detected   | 31068.1 | Detected   | Ift27         | 0.918166746 | 1.08375127 | 0.93430308 | 1.1027977 |
| A_55_P2172 | 67.1    | Detected | 52      | Detected   | 58.5    | Detected   | 61.6    | Detected   | Kcne1l        | 0.918032787 | 0.87183308 | 1.18461538 | 1.125     |
| A_55_P2052 | 73342.5 | Detected | 58258.6 | Detected   | 71564.1 | Detected   | 67328.6 | Detected   | Ctbp1         | 0.918002522 | 0.97575212 | 1.15568517 | 1.2283869 |
| A_55_P2110 | 18311.3 | Detected | 18058.9 | Detected   | 13953.1 | Detected   | 16809.1 | Detected   | Figl1         | 0.917963225 | 0.76199396 | 0.93079313 | 0.772644  |
| A_52_P5564 | 767.9   | Detected | 796.6   | Detected   | 796.2   | Detected   | 704.9   | Detected   | Fancd2        | 0.917958067 | 1.03685376 | 0.88488576 | 0.9994979 |
| A_52_P1558 | 2212.4  | Detected | 2469.2  | Detected   | 2627.5  | Detected   | 2030.8  | Detected   | 2010204K13Rik | 0.917917194 | 1.1876243  | 0.82245262 | 1.0641098 |
| A_52_P3452 | 4832.6  | Detected | 3768.3  | Detected   | 5119.8  | Detected   | 4435.9  | Detected   | Tfb1m         | 0.917911683 | 1.05942971 | 1.17716212 | 1.3586498 |
| A_55_P1997 | 34434.8 | Detected | 37505.6 | Detected   | 35618   | Detected   | 31605.5 | Detected   | Nhp2l1        | 0.917836026 | 1.03436059 | 0.84268749 | 0.9496715 |
| A_51_P1421 | 502     | Detected | 351.8   | Detected   | 491.2   | Detected   | 460.7   | Detected   | Hspa13        | 0.917729084 | 0.97848606 | 1.30955088 | 1.3962479 |
| A_55_P2032 | 21913.1 | Detected | 18199.6 | Detected   | 19548.3 | Detected   | 20109.9 | Detected   | Rbm10         | 0.917711323 | 0.89208282 | 1.10496385 | 1.074106  |
| A_55_P2036 | 9086.3  | Detected | 7803.6  | Detected   | 11280.3 | Detected   | 8338.6  | Detected   | Pnkd          | 0.91771128  | 1.24146242 | 1.0685581  | 1.4455251 |
| A_55_P1982 | 6574.6  | Detected | 4801.7  | Detected   | 6274.6  | Detected   | 6033.2  | Detected   | Sgsm2         | 0.917652785 | 0.95436985 | 1.25647167 | 1.3067455 |
| A_55_P2153 | 928.6   | Detected | 788.3   | Detected   | 837     | Detected   | 852.1   | Detected   | Ccdc127       | 0.917617919 | 0.90135688 | 1.08093365 | 1.0617785 |
| A_55_P1967 | 2823.9  | Detected | 2189.7  | Detected   | 2462.2  | Detected   | 2591.2  | Detected   | Tmem158       | 0.917596232 | 0.87191473 | 1.18335845 | 1.1244463 |
| A_55_P2000 | 18.2    | Detected | 17.6    | Not Detect | 16.8    | Not Detect | 16.7    | Not Detect | Olf1340       | 0.917582418 | 0.92307692 | 0.94886364 | 0.9545455 |
| A_55_P1976 | 2682.6  | Detected | 2728.9  | Detected   | 1935.1  | Detected   | 2461.5  | Detected   | Psme4         | 0.91757996  | 0.72135242 | 0.9020118  | 0.7091136 |
| A_55_P1997 | 3282.7  | Detected | 2432    | Detected   | 3326.6  | Detected   | 3012.1  | Detected   | Fam135a       | 0.917567856 | 1.01337314 | 1.23852796 | 1.3678454 |
| A_51_P1978 | 2457.6  | Detected | 2214.9  | Detected   | 2162.7  | Detected   | 2255    | Detected   | Exo5          | 0.917561849 | 0.88000488 | 1.01810465 | 0.9764323 |
| A_55_P2132 | 1899.7  | Detected | 1728    | Detected   | 1686    | Detected   | 1743    | Detected   | Nfx1          | 0.917513292 | 0.88750855 | 1.00868056 | 0.9756944 |
| A_51_P1582 | 25353.8 | Detected | 26328.6 | Detected   | 25845.5 | Detected   | 23261.2 | Detected   | Mcm2          | 0.917464049 | 1.01939354 | 0.88349551 | 0.9816511 |
| A_51_P3656 | 4030.9  | Detected | 3779.1  | Detected   | 4277.3  | Detected   | 3697.8  | Detected   | Tmem101       | 0.917363368 | 1.06112779 | 0.97848694 | 1.1318303 |
| A_52_P1976 | 8621.3  | Detected | 6380    | Detected   | 5933.6  | Detected   | 7908.6  | Detected   | Med12         | 0.917332653 | 0.68824887 | 1.23959248 | 0.9300313 |

|            |          |            |          |            |          |            |          |            |               |             |            |            |           |
|------------|----------|------------|----------|------------|----------|------------|----------|------------|---------------|-------------|------------|------------|-----------|
| A_55_P2008 | 7881.4   | Detected   | 6419     | Detected   | 7144.7   | Detected   | 7229.2   | Detected   | Wtap          | 0.917248205 | 0.90652676 | 1.12621904 | 1.113055  |
| A_55_P2099 | 30.2     | Detected   | 27.6     | Detected   | 19       | Detected   | 27.7     | Not Detect | F730043M19Rik | 0.917218543 | 0.62913907 | 1.00362319 | 0.6884058 |
| A_52_P1817 | 2708.3   | Detected   | 1988.4   | Detected   | 2692     | Detected   | 2484.1   | Detected   | Crkl          | 0.917217443 | 0.99398146 | 1.24929592 | 1.3538523 |
| A_55_P2093 | 3727.8   | Detected   | 3919.6   | Detected   | 5056     | Detected   | 3418.7   | Detected   | Coil          | 0.917082462 | 1.35629594 | 0.87220635 | 1.2899275 |
| A_55_P2182 | 187133.5 | Detected   | 149291.3 | Detected   | 178380.1 | Detected   | 171612.6 | Detected   | Rpl39         | 0.917059746 | 0.95322377 | 1.14951508 | 1.1948459 |
| A_51_P3119 | 2601.7   | Detected   | 2318.8   | Detected   | 2823.5   | Detected   | 2385.8   | Detected   | Ptk2b         | 0.917015797 | 1.08525195 | 1.02889426 | 1.2176557 |
| A_55_P2213 | 342      | Detected   | 259.1    | Detected   | 263.4    | Detected   | 313.6    | Detected   | Cgnl1         | 0.916959064 | 0.77017544 | 1.2103435  | 1.0165959 |
| A_51_P4117 | 19239.2  | Detected   | 20973.6  | Detected   | 14842.7  | Detected   | 17640.2  | Detected   | Ankrd13b      | 0.916888436 | 0.77148218 | 0.84106687 | 0.7076849 |
| A_55_P2126 | 230.7    | Detected   | 162.6    | Detected   | 318.4    | Detected   | 211.5    | Detected   | Gfpt1         | 0.916775033 | 1.38014738 | 1.30073801 | 1.9581796 |
| A_55_P2122 | 2016.3   | Detected   | 1961     | Detected   | 1925.2   | Detected   | 1848.4   | Detected   | Emc1          | 0.916728661 | 0.95481823 | 0.94258032 | 0.981744  |
| A_51_P3933 | 9.6      | Not Detect | 16.7     | Detected   | 18.6     | Detected   | 8.8      | Not Detect | Gfpt1         | 0.916666667 | 1.9375     | 0.52694611 | 1.1137725 |
| A_55_P2038 | 9.6      | Not Detect | 17.1     | Detected   | 9.7      | Not Detect | 8.8      | Not Detect | Gm9962        | 0.916666667 | 1.01041667 | 0.51461988 | 0.5672515 |
| A_55_P2088 | 279.5    | Detected   | 276.7    | Detected   | 333.2    | Detected   | 256.2    | Detected   | Vmn1r87       | 0.916636852 | 1.1921288  | 0.92591254 | 1.2041923 |
| A_55_P1986 | 19049.4  | Detected   | 17736.1  | Detected   | 16935.3  | Detected   | 17461    | Detected   | Ddx54         | 0.916616796 | 0.88902013 | 0.98448926 | 0.9548491 |
| A_51_P4889 | 5715.2   | Detected   | 6432.6   | Detected   | 6579.3   | Detected   | 5238.4   | Detected   | Oaf           | 0.916573348 | 1.15119331 | 0.8143519  | 1.0228057 |
| A_66_P1239 | 3743     | Detected   | 3313.8   | Detected   | 3682.4   | Detected   | 3430.6   | Detected   | Smim13        | 0.916537537 | 0.98380978 | 1.03524654 | 1.1112318 |
| A_55_P2134 | 10859.5  | Detected   | 8621.6   | Detected   | 8474.9   | Detected   | 9952.9   | Detected   | Msl3          | 0.916515493 | 0.78041346 | 1.15441449 | 0.9829846 |
| A_52_P2953 | 31085.8  | Detected   | 28794.1  | Detected   | 30889.8  | Detected   | 28489.9  | Detected   | Wdr46         | 0.916492418 | 0.99369487 | 0.98943534 | 1.0727823 |
| A_55_P2155 | 15663.9  | Detected   | 11868.4  | Detected   | 12660.8  | Detected   | 14355.8  | Detected   | Ssbp2         | 0.916489508 | 0.80827891 | 1.20958175 | 1.0667655 |
| A_66_P1013 | 28.7     | Detected   | 32.6     | Detected   | 27.6     | Detected   | 26.3     | Not Detect | D430020J02Rik | 0.916376307 | 0.96167247 | 0.80674847 | 0.8466258 |
| A_55_P2048 | 229499   | Detected   | 208951.6 | Detected   | 247442   | Detected   | 210301.3 | Detected   | Rpl27a        | 0.916349527 | 1.07818335 | 1.00645939 | 1.1842073 |
| A_52_P2096 | 136725.3 | Detected   | 135761.3 | Detected   | 118731.5 | Detected   | 125283.9 | Detected   | Hnrnpab       | 0.91631834  | 0.86839451 | 0.92282484 | 0.8745607 |
| A_51_P3687 | 19522.1  | Detected   | 16767.9  | Detected   | 18842.2  | Detected   | 17888    | Detected   | Tmbim4        | 0.916294866 | 0.9651728  | 1.06680026 | 1.1237066 |
| A_55_P1955 | 884.5    | Detected   | 942.7    | Detected   | 953.7    | Detected   | 810.4    | Detected   | 4933415F23Rik | 0.916223855 | 1.07823629 | 0.85965843 | 1.0116686 |
| A_51_P4106 | 4633     | Detected   | 3176.1   | Detected   | 3845     | Detected   | 4244.8   | Detected   | Dpp9          | 0.916209799 | 0.82991582 | 1.33648185 | 1.2106042 |
| A_52_P3164 | 1618.8   | Detected   | 897.7    | Detected   | 1413.2   | Detected   | 1483.1   | Detected   | 1810013L24Rik | 0.916172473 | 0.87299234 | 1.65211095 | 1.5742453 |
| A_55_P2419 | 215.8    | Detected   | 182.5    | Detected   | 152.9    | Detected   | 197.7    | Detected   | 4732460I02Rik | 0.916126043 | 0.70852641 | 1.08328767 | 0.8378082 |
| A_51_P2062 | 9729.5   | Detected   | 8739.1   | Detected   | 9628.7   | Detected   | 8913.1   | Detected   | Ahcy11        | 0.916090241 | 0.98963976 | 1.01991052 | 1.1017954 |
| A_55_P2165 | 14.3     | Detected   | 12.6     | Not Detect | 14       | Not Detect | 13.1     | Not Detect | Nxph4         | 0.916083916 | 0.97902098 | 1.03968254 | 1.1111111 |
| A_55_P1998 | 541.9    | Detected   | 588.5    | Detected   | 563.6    | Detected   | 496.4    | Detected   | Wbp4          | 0.916036169 | 1.04004429 | 0.84350042 | 0.957689  |
| A_55_P2072 | 6187.4   | Detected   | 7416.2   | Detected   | 6891.9   | Detected   | 5667.8   | Detected   | Chsy1         | 0.916022885 | 1.11386043 | 0.76424584 | 0.9293034 |
| A_55_P2060 | 73.7     | Detected   | 77.7     | Detected   | 52.5     | Detected   | 67.5     | Detected   | Gm13807       | 0.91587517  | 0.71234735 | 0.86872587 | 0.6756757 |
| A_55_P2093 | 178.2    | Detected   | 153.4    | Detected   | 157.2    | Detected   | 163.2    | Detected   | Zbtb14        | 0.915824916 | 0.88215488 | 1.06388527 | 1.0247718 |
| A_52_P2127 | 235.1    | Detected   | 139.2    | Detected   | 238.2    | Detected   | 215.3    | Detected   | Tor1aip2      | 0.915780519 | 1.01318588 | 1.5466954  | 1.7112069 |
| A_55_P2013 | 251.7    | Detected   | 214.1    | Detected   | 263.6    | Detected   | 230.5    | Detected   | Gm11677       | 0.915772745 | 1.04727851 | 1.07659972 | 1.2312004 |
| A_51_P1041 | 43.9     | Detected   | 28.4     | Detected   | 33.3     | Detected   | 40.2     | Not Detect | Zfp128        | 0.91571754  | 0.75854214 | 1.41549296 | 1.1725352 |
| A_51_P2595 | 1246.9   | Detected   | 1418     | Detected   | 1242.3   | Detected   | 1141.8   | Detected   | Gpatch3       | 0.915710963 | 0.99631085 | 0.80521862 | 0.8760931 |
| A_55_P2073 | 860      | Detected   | 538.3    | Detected   | 831.8    | Detected   | 787.5    | Detected   | 1600014C10Rik | 0.915697674 | 0.9672093  | 1.46293888 | 1.545235  |
| A_55_P2118 | 67.6     | Detected   | 45.8     | Detected   | 56.4     | Detected   | 61.9     | Detected   | Olf1r1349     | 0.915680473 | 0.83431953 | 1.35152838 | 1.231441  |
| A_51_P3844 | 1072.9   | Detected   | 1174.2   | Detected   | 887.7    | Detected   | 982.3    | Detected   | Tmem201       | 0.91555597  | 0.82738373 | 0.83656958 | 0.7560041 |

|            |         |            |         |            |          |            |         |            |               |             |            |            |           |
|------------|---------|------------|---------|------------|----------|------------|---------|------------|---------------|-------------|------------|------------|-----------|
| A_55_P1963 | 2278.2  | Detected   | 1865.4  | Detected   | 2263.8   | Detected   | 2085.8  | Detected   | Zfp689        | 0.915547362 | 0.99367922 | 1.1181516  | 1.2135735 |
| A_55_P1997 | 4620.8  | Detected   | 3661.2  | Detected   | 3934.4   | Detected   | 4230.1  | Detected   | Mtr           | 0.915447542 | 0.85145429 | 1.15538621 | 1.0746203 |
| A_51_P3392 | 1709.8  | Detected   | 1422.8  | Detected   | 1630.4   | Detected   | 1565.2  | Detected   | Abhd16a       | 0.915428705 | 0.95356182 | 1.10008434 | 1.1459095 |
| A_55_P2107 | 12978.8 | Detected   | 12004.6 | Detected   | 11579    | Detected   | 11879.6 | Detected   | Hnrnpk        | 0.915308041 | 0.89214719 | 0.98958732 | 0.9645469 |
| A_55_P2145 | 727.3   | Detected   | 573.6   | Detected   | 555.3    | Detected   | 665.7   | Detected   | Thoc2         | 0.915303176 | 0.76350887 | 1.16056485 | 0.9680962 |
| A_52_P6083 | 4286.8  | Detected   | 4094.2  | Detected   | 3375.7   | Detected   | 3923.6  | Detected   | Maff          | 0.915274797 | 0.78746384 | 0.9583313  | 0.8245078 |
| A_51_P3357 | 2622.1  | Detected   | 1335.7  | Detected   | 902.6    | Detected   | 2399.9  | Detected   | Afap1         | 0.915258762 | 0.34422791 | 1.79673579 | 0.6757505 |
| A_55_P2216 | 384.7   | Detected   | 281.3   | Detected   | 340.1    | Detected   | 352.1   | Detected   | Tmem87a       | 0.915258643 | 0.88406551 | 1.25168859 | 1.2090295 |
| A_52_P5113 | 12982.8 | Detected   | 9933.4  | Detected   | 9546     | Detected   | 11882.4 | Detected   | Tesk1         | 0.915241704 | 0.73528053 | 1.19620674 | 0.9610003 |
| A_55_P2122 | 21551.2 | Detected   | 20267   | Detected   | 29206.5  | Detected   | 19723.4 | Detected   | Dtymk         | 0.915188017 | 1.35521456 | 0.97317807 | 1.4410865 |
| A_55_P2322 | 10.6    | Not Detect | 18.6    | Detected   | 6.1      | Not Detect | 9.7     | Not Detect | C78859        | 0.91509434  | 0.5754717  | 0.52150538 | 0.327957  |
| A_52_P2199 | 2021    | Detected   | 1608.6  | Detected   | 1928.7   | Detected   | 1849.3  | Detected   | Spg21         | 0.915042058 | 0.95432954 | 1.14963322 | 1.1989929 |
| A_55_P1968 | 98766.2 | Detected   | 93116.4 | Detected   | 100770.4 | Detected   | 90374.1 | Detected   | Btf3          | 0.915030648 | 1.02029237 | 0.97054976 | 1.0821982 |
| A_55_P2264 | 90.6    | Detected   | 62.1    | Detected   | 38.8     | Detected   | 82.9    | Detected   | B230334L07Rik | 0.915011038 | 0.42825607 | 1.33494364 | 0.6247987 |
| A_55_P2108 | 8920.8  | Detected   | 7660.7  | Detected   | 10217.6  | Detected   | 8162.6  | Detected   | Arhgap22      | 0.915007623 | 1.14536813 | 1.06551621 | 1.3337685 |
| A_52_P7933 | 182.3   | Detected   | 176.8   | Detected   | 126.4    | Detected   | 166.8   | Detected   | BC065397      | 0.914975315 | 0.69336259 | 0.94343891 | 0.7149321 |
| A_52_P1639 | 13920.8 | Detected   | 12870.5 | Detected   | 14450.8  | Detected   | 12736.9 | Detected   | Poldip2       | 0.9149546   | 1.03807252 | 0.98961967 | 1.1227847 |
| A_51_P1932 | 172.8   | Detected   | 156     | Detected   | 165.3    | Detected   | 158.1   | Detected   | Iqcf1         | 0.914930556 | 0.95659722 | 1.01346154 | 1.0596154 |
| A_55_P2135 | 14.1    | Detected   | 3.1     | Not Detect | 3.2      | Not Detect | 12.9    | Not Detect | Gm13023       | 0.914893617 | 0.22695035 | 4.16129032 | 1.0322581 |
| A_55_P1963 | 9768.9  | Detected   | 3618.5  | Detected   | 9711.9   | Detected   | 8937    | Detected   | Oxr1          | 0.914841999 | 0.99416516 | 2.46980793 | 2.6839574 |
| A_55_P1953 | 3811.4  | Detected   | 4021.9  | Detected   | 3257.1   | Detected   | 3486.1  | Detected   | Mccc1         | 0.914650784 | 0.85456788 | 0.86677938 | 0.8098411 |
| A_55_P2047 | 19386.2 | Detected   | 12689.7 | Detected   | 21379.1  | Detected   | 17731.2 | Detected   | Ufd1l         | 0.914629995 | 1.10279993 | 1.39729072 | 1.6847601 |
| A_55_P2111 | 28339.6 | Detected   | 25561.6 | Detected   | 27699.7  | Detected   | 25919.4 | Detected   | Dnajc7        | 0.914600065 | 0.97742029 | 1.01399756 | 1.083645  |
| A_52_P2310 | 46.8    | Detected   | 39.6    | Detected   | 31.9     | Detected   | 42.8    | Not Detect | Fcrls         | 0.914529915 | 0.68162393 | 1.08080808 | 0.8055556 |
| A_51_P4435 | 2899.4  | Detected   | 2274.5  | Detected   | 2681.6   | Detected   | 2651.5  | Detected   | 1700001K19Rik | 0.914499552 | 0.92488101 | 1.16575071 | 1.1789844 |
| A_51_P3699 | 9159.4  | Detected   | 7319.7  | Detected   | 8730.2   | Detected   | 8375.6  | Detected   | Fra10ac1      | 0.914426709 | 0.95314104 | 1.14425455 | 1.1926992 |
| A_55_P1990 | 3737.8  | Detected   | 2190.2  | Detected   | 4557.1   | Detected   | 3417.5  | Detected   | Nxt2          | 0.914307882 | 1.21919311 | 1.56035978 | 2.0806776 |
| A_51_P1213 | 51736.4 | Detected   | 34287.5 | Detected   | 49360.1  | Detected   | 47302.2 | Detected   | Anapc11       | 0.914292452 | 0.95406909 | 1.37957565 | 1.4395946 |
| A_55_P1960 | 176.1   | Detected   | 149.8   | Detected   | 176.7    | Detected   | 161     | Detected   | Mob1b         | 0.914253265 | 1.00340716 | 1.07476636 | 1.1795728 |
| A_55_P1963 | 56190   | Detected   | 55075.8 | Detected   | 48147.2  | Detected   | 51370.3 | Detected   | G3bp1         | 0.914224951 | 0.85686421 | 0.93272    | 0.8741988 |
| A_55_P2111 | 71.1    | Detected   | 355.3   | Detected   | 38.4     | Detected   | 65      | Detected   | Trpv2         | 0.914205345 | 0.54008439 | 0.18294399 | 0.1080777 |
| A_51_P4951 | 19361.1 | Detected   | 15837.7 | Detected   | 14937.8  | Detected   | 17697.5 | Detected   | Pbdc1         | 0.91407513  | 0.77153674 | 1.11742867 | 0.9431799 |
| A_55_P1971 | 10590.6 | Detected   | 7827.8  | Detected   | 1234.4   | Detected   | 9680.3  | Detected   | Atp11a        | 0.914046419 | 0.11655619 | 1.23665653 | 0.1576944 |
| A_51_P4854 | 8058.1  | Detected   | 6098.7  | Detected   | 6305.3   | Detected   | 7365.4  | Detected   | Prrc2a        | 0.914036808 | 0.78247974 | 1.2077     | 1.0338761 |
| A_51_P4878 | 1259.1  | Detected   | 1197.5  | Detected   | 1230.9   | Detected   | 1150.8  | Detected   | Cyp4f16       | 0.913986181 | 0.97760305 | 0.96100209 | 1.0278914 |
| A_55_P2045 | 18.6    | Detected   | 13.9    | Not Detect | 8.2      | Not Detect | 17      | Not Detect | Pnma3         | 0.913978495 | 0.44086022 | 1.22302158 | 0.5899281 |
| A_55_P2117 | 11171.2 | Detected   | 6697.3  | Detected   | 9978.9   | Detected   | 10209.8 | Detected   | Ntan1         | 0.913939416 | 0.89327019 | 1.52446508 | 1.4899885 |
| A_55_P2011 | 12936.1 | Detected   | 12911.9 | Detected   | 10503    | Detected   | 11822.8 | Detected   | Akirin2       | 0.913938513 | 0.81191395 | 0.91565145 | 0.8134357 |
| A_55_P2039 | 1973.3  | Detected   | 2322.3  | Detected   | 1668.9   | Detected   | 1803.4  | Detected   | Ift88         | 0.913900573 | 0.84574064 | 0.77655772 | 0.718641  |
| A_55_P2149 | 222.7   | Detected   | 232.2   | Detected   | 219.2    | Detected   | 203.5   | Detected   | Galt          | 0.913785361 | 0.98428379 | 0.87639966 | 0.9440138 |

|            |                   |                   |                   |                   |               |             |            |            |           |
|------------|-------------------|-------------------|-------------------|-------------------|---------------|-------------|------------|------------|-----------|
| A_66_P1381 | 73 Detected       | 58.6 Detected     | 53 Detected       | 66.7 Detected     | Gm4107        | 0.91369863  | 0.7260274  | 1.13822526 | 0.9044369 |
| A_55_P2007 | 121.6 Detected    | 99 Detected       | 97.5 Detected     | 111.1 Detected    | Slc12a6       | 0.913651316 | 0.80180921 | 1.12222222 | 0.9848485 |
| A_52_P3657 | 46891.5 Detected  | 47115.2 Detected  | 43864.8 Detected  | 42840.5 Detected  | Nsun2         | 0.913609076 | 0.93545312 | 0.90927132 | 0.9310116 |
| A_51_P2742 | 333.1 Detected    | 378.7 Detected    | 944.3 Detected    | 304.3 Detected    | Ak5           | 0.913539478 | 2.83488442 | 0.80353842 | 2.4935305 |
| A_55_P1984 | 156251.2 Detected | 155920.8 Detected | 181556.7 Detected | 142737.5 Detected | 1600029O15Rik | 0.913512984 | 1.16195396 | 0.91544874 | 1.1644162 |
| A_51_P2971 | 26798.8 Detected  | 25647.6 Detected  | 24174.2 Detected  | 24480.5 Detected  | Sf3a3         | 0.913492395 | 0.90206278 | 0.95449477 | 0.9425521 |
| A_51_P1114 | 1810.7 Detected   | 2059.7 Detected   | 1737.5 Detected   | 1653.9 Detected   | Wdr77         | 0.913403656 | 0.95957365 | 0.80298102 | 0.8435695 |
| A_55_P2128 | 305.8 Detected    | 297.8 Detected    | 271.4 Detected    | 279.3 Detected    | Gm4349        | 0.913342054 | 0.88750818 | 0.93787777 | 0.9113499 |
| A_51_P1979 | 129.2 Detected    | 117.2 Detected    | 139 Detected      | 118 Detected      | Iws1          | 0.913312693 | 1.07585139 | 1.00682594 | 1.1860068 |
| A_51_P1831 | 4325.2 Detected   | 4456.2 Detected   | 4723.4 Detected   | 3950.1 Detected   | Rnf139        | 0.913275687 | 1.09206511 | 0.8864279  | 1.0599614 |
| A_55_P2374 | 21.9 Detected     | 29.8 Detected     | 7 Not Detect      | 20 Not Detect     | F730016J06Rik | 0.913242009 | 0.3196347  | 0.67114094 | 0.2348993 |
| A_51_P2709 | 44770.3 Detected  | 36695.4 Detected  | 46259.5 Detected  | 40884.5 Detected  | Hist1h1b      | 0.913205853 | 1.03326312 | 1.11415872 | 1.2606348 |
| A_52_P3276 | 13773.7 Detected  | 11092.2 Detected  | 14248.4 Detected  | 12577.5 Detected  | Rab18         | 0.913153328 | 1.03446423 | 1.13390491 | 1.2845423 |
| A_52_P2970 | 49.5 Detected     | 42.5 Detected     | 51.5 Detected     | 45.2 Not Detect   | Elp4          | 0.913131313 | 1.04040404 | 1.06352941 | 1.2117647 |
| A_55_P2071 | 204.9 Detected    | 127.8 Detected    | 185.7 Detected    | 187.1 Detected    | Zfp788        | 0.913128355 | 0.90629575 | 1.46400626 | 1.4530516 |
| A_51_P1130 | 4243.8 Detected   | 3321.3 Detected   | 4553.3 Detected   | 3875 Detected     | Cenpq         | 0.913096753 | 1.07292992 | 1.16671183 | 1.3709391 |
| A_55_P2020 | 4402.1 Detected   | 4058.5 Detected   | 3441.9 Detected   | 4019.2 Detected   | Lzts3         | 0.913018786 | 0.78187683 | 0.99031662 | 0.8480719 |
| A_51_P1016 | 564.3 Detected    | 728.2 Detected    | 457.8 Detected    | 515.2 Detected    | 1200014J11Rik | 0.912989545 | 0.8112706  | 0.70749794 | 0.6286734 |
| A_55_P1968 | 1347.6 Detected   | 1138.4 Detected   | 1191.5 Detected   | 1230.3 Detected   | Nfkb1         | 0.912956367 | 0.88416444 | 1.08072734 | 1.0466444 |
| A_55_P2112 | 33.3 Detected     | 35.8 Detected     | 11.3 Not Detect   | 30.4 Not Detect   | Ern1          | 0.912912913 | 0.33933934 | 0.84916201 | 0.3156425 |
| A_55_P2118 | 320.2 Detected    | 197.4 Detected    | 317.2 Detected    | 292.3 Detected    | Lasp1         | 0.912866958 | 0.99063086 | 1.48074975 | 1.6068896 |
| A_55_P1978 | 24.1 Detected     | 12 Not Detect     | 28.7 Detected     | 22 Not Detect     | Dcaf17        | 0.912863071 | 1.19087137 | 1.83333333 | 2.3916667 |
| A_55_P1964 | 312914.2 Detected | 302090.3 Detected | 308231.8 Detected | 285626 Detected   | Gm14217       | 0.912793347 | 0.98503615 | 0.94549875 | 1.02033   |
| A_51_P1256 | 366.8 Detected    | 296.9 Detected    | 548.5 Detected    | 334.8 Detected    | 2410076I21Rik | 0.912758997 | 1.49536532 | 1.12765241 | 1.8474234 |
| A_55_P1961 | 20834.2 Detected  | 20025.2 Detected  | 19279.3 Detected  | 19016.2 Detected  | LOC101055913  | 0.91273963  | 0.9253679  | 0.94961349 | 0.9627519 |
| A_55_P2079 | 104.1 Detected    | 98.3 Detected     | 80.3 Detected     | 95 Detected       | Prss50        | 0.912584054 | 0.77137368 | 0.9664293  | 0.8168871 |
| A_52_P4641 | 3227.3 Detected   | 2749.9 Detected   | 3721.6 Detected   | 2944.9 Detected   | AK010878      | 0.912496514 | 1.15316209 | 1.07091167 | 1.3533583 |
| A_55_P2111 | 92.5 Detected     | 60.3 Detected     | 94.3 Detected     | 84.4 Detected     | Polq          | 0.912432432 | 1.01945946 | 1.39966833 | 1.5638474 |
| A_55_P1998 | 4172.7 Detected   | 5111.5 Detected   | 3283.8 Detected   | 3807.3 Detected   | Ccdc137       | 0.9124308   | 0.78697246 | 0.74484985 | 0.6424337 |
| A_55_P2000 | 7031.5 Detected   | 5601.5 Detected   | 8698.6 Detected   | 6415 Detected     | Mettl21a      | 0.912323117 | 1.23709024 | 1.14522896 | 1.5529055 |
| A_51_P3483 | 1327.4 Detected   | 712.8 Detected    | 1879.5 Detected   | 1210.9 Detected   | Hexim1        | 0.912234443 | 1.41592587 | 1.69879349 | 2.6367845 |
| A_51_P4538 | 15776.4 Detected  | 14975.5 Detected  | 17398.9 Detected  | 14389.5 Detected  | Csnk1a1       | 0.912090211 | 1.10284349 | 0.96086942 | 1.1618243 |
| A_55_P2115 | 17823.8 Detected  | 3585 Detected     | 7788.7 Detected   | 16256.2 Detected  | Inpp5j        | 0.91205018  | 0.43698313 | 4.53450488 | 2.1725802 |
| A_52_P3372 | 4528.7 Detected   | 2900.6 Detected   | 4194.4 Detected   | 4130.3 Detected   | Mgat4b        | 0.912027734 | 0.92618191 | 1.42394677 | 1.4460456 |
| A_55_P2061 | 144679 Detected   | 144586.5 Detected | 162123.5 Detected | 131944.3 Detected | Rpl17         | 0.911979624 | 1.12057382 | 0.91256307 | 1.1212907 |
| A_51_P1141 | 3716.5 Detected   | 2265.2 Detected   | 4127.5 Detected   | 3389.2 Detected   | Eci3          | 0.911933271 | 1.11058792 | 1.49620343 | 1.8221349 |
| A_51_P1696 | 792.4 Detected    | 569.8 Detected    | 761.2 Detected    | 722.6 Detected    | Taf3          | 0.911913175 | 0.96062595 | 1.26816427 | 1.3359073 |
| A_51_P1579 | 1208.2 Detected   | 1054.4 Detected   | 1185 Detected     | 1101.7 Detected   | Mmab          | 0.911852342 | 0.98079788 | 1.04485964 | 1.1238619 |
| A_66_P1330 | 594.3 Detected    | 536.2 Detected    | 534.8 Detected    | 541.9 Detected    | Diablo        | 0.911829043 | 0.89988221 | 1.01063036 | 0.997389  |
| A_55_P2213 | 17 Detected       | 17.1 Not Detect   | 11.1 Not Detect   | 15.5 Not Detect   | 4933416M07Rik | 0.911764706 | 0.65294118 | 0.90643275 | 0.6491228 |

|            |          |          |          |            |          |            |          |            |               |             |            |            |           |
|------------|----------|----------|----------|------------|----------|------------|----------|------------|---------------|-------------|------------|------------|-----------|
| A_55_P2027 | 3463.6   | Detected | 2584.1   | Detected   | 3616     | Detected   | 3157.8   | Detected   | Taf3          | 0.911710359 | 1.04400046 | 1.22201153 | 1.3993267 |
| A_52_P4338 | 46.4     | Detected | 45.7     | Detected   | 25.8     | Detected   | 42.3     | Not Detect | Gab3          | 0.911637931 | 0.55603448 | 0.92560175 | 0.5645514 |
| A_55_P2103 | 12246.1  | Detected | 13380.1  | Detected   | 13094.7  | Detected   | 11163.9  | Detected   | Gm3258        | 0.911629008 | 1.06929553 | 0.83436596 | 0.9786698 |
| A_55_P2121 | 4519.8   | Detected | 3413.3   | Detected   | 4077.7   | Detected   | 4120.3   | Detected   | Amd2          | 0.911611133 | 0.90218594 | 1.20713093 | 1.1946503 |
| A_55_P2163 | 74931.7  | Detected | 74469.5  | Detected   | 80367.1  | Detected   | 68304.2  | Detected   | Cdk4          | 0.911552787 | 1.07253806 | 0.9172104  | 1.0791948 |
| A_55_P1953 | 2916.6   | Detected | 2380     | Detected   | 2143.5   | Detected   | 2658.6   | Detected   | Fam193a       | 0.911540835 | 0.73493108 | 1.11705882 | 0.9006303 |
| A_55_P2136 | 3121.5   | Detected | 1753.5   | Detected   | 2196.4   | Detected   | 2845.3   | Detected   | Rnf38         | 0.911516899 | 0.70363607 | 1.62264043 | 1.2525806 |
| A_52_P2079 | 6451.4   | Detected | 5921.1   | Detected   | 6737.5   | Detected   | 5880.5   | Detected   | Mrps18b       | 0.91150758  | 1.04434696 | 0.99314317 | 1.1378798 |
| A_55_P2106 | 52880    | Detected | 39360.9  | Detected   | 47772.3  | Detected   | 48192.5  | Detected   | Ndufs3        | 0.9113559   | 0.90340961 | 1.22437495 | 1.2136994 |
| A_55_P2094 | 20.3     | Detected | 22.6     | Detected   | 14.7     | Not Detect | 18.5     | Not Detect | Ulk4          | 0.911330049 | 0.72413793 | 0.81858407 | 0.6504425 |
| A_55_P2412 | 549.1    | Detected | 517.5    | Detected   | 1423     | Detected   | 500.4    | Detected   | A830052D11Rik | 0.911309415 | 2.59151339 | 0.96695652 | 2.7497585 |
| A_51_P1700 | 101.3    | Detected | 76.9     | Detected   | 60.8     | Detected   | 92.3     | Detected   | Lce1m         | 0.911154985 | 0.60019743 | 1.20026008 | 0.7906372 |
| A_55_P2138 | 32860    | Detected | 23560.7  | Detected   | 32652.5  | Detected   | 29939.7  | Detected   | Mrpl40        | 0.911129032 | 0.99368533 | 1.27074747 | 1.3858884 |
| A_55_P2083 | 160890.2 | Detected | 155840.2 | Detected   | 175251.3 | Detected   | 146578.1 | Detected   | Gm6613        | 0.911044302 | 1.08926025 | 0.94056668 | 1.1245577 |
| A_55_P2054 | 288.9    | Detected | 243.2    | Detected   | 284.7    | Detected   | 263.2    | Detected   | Sh3bgrl2      | 0.911041883 | 0.9854621  | 1.08223684 | 1.1706414 |
| A_55_P2137 | 259666.7 | Detected | 233729.8 | Detected   | 263578.2 | Detected   | 236554.7 | Detected   | Rpl14         | 0.910993593 | 1.01506354 | 1.01208618 | 1.1277047 |
| A_55_P2027 | 14.6     | Detected | 11.8     | Not Detect | 16.8     | Detected   | 13.3     | Not Detect | Kir3dl2       | 0.910958904 | 1.15068493 | 1.12711864 | 1.4237288 |
| A_55_P1952 | 21644.6  | Detected | 24197    | Detected   | 21933.3  | Detected   | 19715.7  | Detected   | Snrpf         | 0.910883084 | 1.0133382  | 0.81479936 | 0.9064471 |
| A_55_P2028 | 264.8    | Detected | 233.9    | Detected   | 195.8    | Detected   | 241.2    | Detected   | Fhl3          | 0.910876133 | 0.73942598 | 1.03120992 | 0.8371099 |
| A_55_P2087 | 132.3    | Detected | 83.4     | Detected   | 95.4     | Detected   | 120.5    | Detected   | Tmem240       | 0.910808768 | 0.72108844 | 1.44484412 | 1.1438849 |
| A_55_P2085 | 319.3    | Detected | 181.2    | Detected   | 298.4    | Detected   | 290.8    | Detected   | Stk38         | 0.910742249 | 0.93454432 | 1.60485651 | 1.6467991 |
| A_55_P1964 | 4605     | Detected | 4423.8   | Detected   | 4166.5   | Detected   | 4193.9   | Detected   | Dnajb6        | 0.91072747  | 0.90477742 | 0.9480311  | 0.9418373 |
| A_55_P2037 | 296407.7 | Detected | 288843.2 | Detected   | 283168.2 | Detected   | 269923.8 | Detected   | Ran           | 0.910650432 | 0.95533348 | 0.93449941 | 0.9803527 |
| A_55_P2055 | 1743.6   | Detected | 1422.7   | Detected   | 2061.3   | Detected   | 1587.7   | Detected   | Frrs1         | 0.910587291 | 1.18220922 | 1.11597666 | 1.4488648 |
| A_55_P2091 | 20753.8  | Detected | 15458.6  | Detected   | 19660.8  | Detected   | 18896.4  | Detected   | Gpr157        | 0.910503137 | 0.94733495 | 1.22238754 | 1.2718357 |
| A_66_P1044 | 20.1     | Detected | 18.9     | Detected   | 22.5     | Detected   | 18.3     | Not Detect | Fbxl12os      | 0.910447761 | 1.11940299 | 0.96825397 | 1.1904762 |
| A_55_P1968 | 15593.7  | Detected | 11741.8  | Detected   | 12491.9  | Detected   | 14197.1  | Detected   | Hypk          | 0.91043819  | 0.80108634 | 1.20910763 | 1.0638829 |
| A_55_P2374 | 117.2    | Detected | 123.5    | Detected   | 116.8    | Detected   | 106.7    | Detected   | 8430428J23Rik | 0.910409556 | 0.99658703 | 0.86396761 | 0.945749  |
| A_52_P5460 | 50179.2  | Detected | 46494.7  | Detected   | 50740.8  | Detected   | 45681.7  | Detected   | Ssr4          | 0.91037123  | 1.01119189 | 0.98251414 | 1.0913244 |
| A_51_P1185 | 3828.6   | Detected | 3596.9   | Detected   | 3259.7   | Detected   | 3485.4   | Detected   | 2700049A03Rik | 0.910358878 | 0.85140783 | 0.96900108 | 0.9062526 |
| A_55_P1991 | 58       | Detected | 46.2     | Detected   | 53.7     | Detected   | 52.8     | Detected   | Tom1l2        | 0.910344828 | 0.92586207 | 1.14285714 | 1.1623377 |
| A_55_P2113 | 82.5     | Detected | 81.4     | Detected   | 65.7     | Detected   | 75.1     | Detected   | Caln1         | 0.91030303  | 0.79636364 | 0.92260442 | 0.8071253 |
| A_52_P1413 | 4300.1   | Detected | 3324.8   | Detected   | 3107.9   | Detected   | 3914.3   | Detected   | Acot10        | 0.910281156 | 0.72275063 | 1.1773039  | 0.934763  |
| A_55_P2008 | 1212.5   | Detected | 1021.6   | Detected   | 1183.4   | Detected   | 1103.6   | Detected   | Zscan12       | 0.910185567 | 0.976      | 1.08026625 | 1.158379  |
| A_55_P2106 | 1114.2   | Detected | 949.5    | Detected   | 138.8    | Detected   | 1014.1   | Detected   | Zfhx3         | 0.910159756 | 0.12457369 | 1.06803581 | 0.1461822 |
| A_55_P1982 | 44.5     | Detected | 31.2     | Detected   | 30.8     | Detected   | 40.5     | Not Detect | Dnajc5        | 0.91011236  | 0.69213483 | 1.29807692 | 0.9871795 |
| A_55_P2105 | 26.7     | Detected | 32       | Detected   | 17.7     | Not Detect | 24.3     | Not Detect | Lrrc18        | 0.91011236  | 0.66292135 | 0.759375   | 0.553125  |
| A_55_P1970 | 106599.5 | Detected | 109527.3 | Detected   | 119407.2 | Detected   | 97013.9  | Detected   | Gm5779        | 0.910078377 | 1.12014784 | 0.88575086 | 1.0902049 |
| A_55_P2183 | 5668.8   | Detected | 5104.3   | Detected   | 4605.2   | Detected   | 5158.2   | Detected   | Gm5296        | 0.909928027 | 0.81237652 | 1.01055972 | 0.9022197 |
| A_55_P2082 | 262.7    | Detected | 271.4    | Detected   | 221.3    | Detected   | 239      | Detected   | Acly          | 0.909783022 | 0.84240579 | 0.88061901 | 0.8154016 |



|            |          |          |         |            |         |          |          |            |               |             |            |            |           |
|------------|----------|----------|---------|------------|---------|----------|----------|------------|---------------|-------------|------------|------------|-----------|
| A_52_P3345 | 31652.9  | Detected | 24476.9 | Detected   | 37101.2 | Detected | 28796.3  | Detected   | Atp5c1-ps     | 0.909752345 | 1.17212641 | 1.17646843 | 1.5157638 |
| A_55_P2075 | 324.6    | Detected | 288.8   | Detected   | 310.8   | Detected | 295.3    | Detected   | Zfp689        | 0.909735059 | 0.95748614 | 1.02250693 | 1.0761773 |
| A_52_P4900 | 28.8     | Detected | 14.2    | Not Detect | 30.6    | Detected | 26.2     | Not Detect | Olf810        | 0.909722222 | 1.0625     | 1.84507042 | 2.1549296 |
| A_52_P4867 | 8808.1   | Detected | 7407.1  | Detected   | 7956.8  | Detected | 8012.7   | Detected   | G3bp1         | 0.909696756 | 0.90335033 | 1.08175939 | 1.0742126 |
| A_52_P5973 | 560.1    | Detected | 326.4   | Detected   | 437.5   | Detected | 509.5    | Detected   | Ncald         | 0.909658989 | 0.78111052 | 1.56096814 | 1.3403799 |
| A_55_P2082 | 10830.3  | Detected | 11294.7 | Detected   | 9672.2  | Detected | 9851.7   | Detected   | Sav1          | 0.909642392 | 0.89306852 | 0.87224096 | 0.8563486 |
| A_52_P6046 | 2521.4   | Detected | 1716.9  | Detected   | 2055.8  | Detected | 2293.5   | Detected   | S1pr2         | 0.909613707 | 0.81534068 | 1.33583785 | 1.1973906 |
| A_52_P4586 | 49.7     | Detected | 39.6    | Detected   | 32.4    | Detected | 45.2     | Detected   | Ttl5          | 0.90945674  | 0.65191147 | 1.14141414 | 0.8181818 |
| A_51_P3416 | 843.3    | Detected | 697.8   | Detected   | 777.9   | Detected | 766.9    | Detected   | Fancc         | 0.909403534 | 0.92244753 | 1.09902551 | 1.1147893 |
| A_55_P2120 | 1897.3   | Detected | 2305.1  | Detected   | 1859.6  | Detected | 1725.4   | Detected   | Gm4701        | 0.909397565 | 0.98012966 | 0.74851416 | 0.8067329 |
| A_52_P4631 | 2159.8   | Detected | 2345.2  | Detected   | 2188.1  | Detected | 1964.1   | Detected   | Dcaf7         | 0.909389758 | 1.01310307 | 0.83749787 | 0.9330121 |
| A_55_P2026 | 93.8     | Detected | 102.4   | Detected   | 59.2    | Detected | 85.3     | Detected   | Rgp1          | 0.909381663 | 0.63113006 | 0.83300781 | 0.578125  |
| A_55_P2019 | 38.6     | Detected | 24.8    | Detected   | 38.3    | Detected | 35.1     | Not Detect | D730005E14Rik | 0.909326425 | 0.99222798 | 1.41532258 | 1.5443548 |
| A_52_P3667 | 1076.1   | Detected | 1667.8  | Detected   | 950     | Detected | 978.5    | Detected   | 2310044G17Rik | 0.909302109 | 0.88281758 | 0.58670104 | 0.5696127 |
| A_55_P1968 | 5333.5   | Detected | 3748.3  | Detected   | 3567.5  | Detected | 4849.4   | Detected   | Cast          | 0.909234086 | 0.66888535 | 1.29375984 | 0.9517648 |
| A_55_P2056 | 1261     | Detected | 1603.8  | Detected   | 493.6   | Detected | 1146.5   | Detected   | Nin           | 0.909199048 | 0.39143537 | 0.7148647  | 0.307769  |
| A_51_P2832 | 1099.5   | Detected | 711.1   | Detected   | 1255.2  | Detected | 999.6    | Detected   | Gm14326       | 0.909140518 | 1.14160982 | 1.40570946 | 1.7651526 |
| A_66_P1348 | 26202.7  | Detected | 29795.5 | Detected   | 22896.9 | Detected | 23821.1  | Detected   | Gas5          | 0.909108603 | 0.87383743 | 0.7994865  | 0.7684684 |
| A_55_P2161 | 41.8     | Detected | 37.8    | Detected   | 32.7    | Detected | 38       | Not Detect | Uimc1         | 0.909090909 | 0.78229665 | 1.00529101 | 0.8650794 |
| A_52_P1045 | 359.7    | Detected | 537.2   | Detected   | 323.1   | Detected | 327      | Detected   | Lipt1         | 0.909090909 | 0.89824854 | 0.60871184 | 0.601452  |
| A_52_P3817 | 2156     | Detected | 1671.6  | Detected   | 1467.7  | Detected | 1960     | Detected   | Whsc1         | 0.909090909 | 0.68075139 | 1.17252931 | 0.8780211 |
| A_52_P1609 | 2654.2   | Detected | 2543.8  | Detected   | 2116    | Detected | 2412.5   | Detected   | Akap10        | 0.908936779 | 0.79722704 | 0.94838431 | 0.8318264 |
| A_52_P1117 | 2437.1   | Detected | 1854.3  | Detected   | 1317.5  | Detected | 2215.1   | Detected   | Hip1          | 0.908908129 | 0.54060153 | 1.19457477 | 0.7105107 |
| A_55_P1977 | 48.3     | Detected | 33.6    | Detected   | 30.7    | Detected | 43.9     | Not Detect | Gltsr1        | 0.908902692 | 0.63561077 | 1.30654762 | 0.9136905 |
| A_55_P2011 | 232188.9 | Detected | 220849  | Detected   | 244588  | Detected | 211030.2 | Detected   | Rpl17         | 0.908872905 | 1.05340092 | 0.95554066 | 1.1074897 |
| A_51_P3231 | 195.3    | Detected | 281.2   | Detected   | 76.3    | Detected | 177.5    | Detected   | Gbp9          | 0.908858167 | 0.390681   | 0.63122333 | 0.2713371 |
| A_51_P2673 | 3740     | Detected | 2669.3  | Detected   | 3327.9  | Detected | 3399     | Detected   | Dxo           | 0.908823529 | 0.88981283 | 1.27336755 | 1.2467314 |
| A_55_P1955 | 302.7    | Detected | 306.2   | Detected   | 340.4   | Detected | 275.1    | Detected   | Alg6          | 0.908820614 | 1.12454575 | 0.8984324  | 1.1116917 |
| A_55_P2158 | 1740.5   | Detected | 1413.4  | Detected   | 2066.3  | Detected | 1581.6   | Detected   | Nos2          | 0.908704395 | 1.18718759 | 1.11900382 | 1.4619358 |
| A_55_P1986 | 5493.3   | Detected | 5758.6  | Detected   | 7329.2  | Detected | 4991.7   | Detected   | Minpp1        | 0.908688766 | 1.33420713 | 0.86682527 | 1.2727399 |
| A_51_P2378 | 18.6     | Detected | 11.9    | Not Detect | 21.5    | Detected | 16.9     | Not Detect | Il4           | 0.908602151 | 1.15591398 | 1.42016807 | 1.8067227 |
| A_51_P2861 | 9968.8   | Detected | 8502    | Detected   | 11059.1 | Detected | 9056.4   | Detected   | Znrd1         | 0.90847444  | 1.10937124 | 1.06520819 | 1.3007645 |
| A_52_P2915 | 885.8    | Detected | 2620.2  | Detected   | 369.5   | Detected | 804.7    | Detected   | Ankrd44       | 0.908444344 | 0.41713705 | 0.30711396 | 0.1410198 |
| A_51_P3371 | 158.3    | Detected | 57.1    | Detected   | 440.7   | Detected | 143.8    | Detected   | Pipox         | 0.908401769 | 2.78395452 | 2.51838879 | 7.7180385 |
| A_55_P2412 | 211.6    | Detected | 177.3   | Detected   | 144.5   | Detected | 192.2    | Detected   | 5830468K08Rik | 0.90831758  | 0.68289225 | 1.08403835 | 0.8150028 |
| A_51_P2813 | 9118.5   | Detected | 6242.2  | Detected   | 4709.2  | Detected | 8282.3   | Detected   | St3gal6       | 0.908296321 | 0.51644459 | 1.32682388 | 0.7544135 |
| A_55_P1980 | 4487.3   | Detected | 3802.3  | Detected   | 4316.6  | Detected | 4075.6   | Detected   | Gltpd1        | 0.908252178 | 0.96195931 | 1.07187755 | 1.1352602 |
| A_52_P4051 | 530.5    | Detected | 481.1   | Detected   | 564.7   | Detected | 481.8    | Detected   | Prkrir        | 0.908199811 | 1.06446748 | 1.001455   | 1.1737684 |
| A_55_P1979 | 281      | Detected | 231.7   | Detected   | 281.8   | Detected | 255.2    | Detected   | Vps52         | 0.908185053 | 1.00284698 | 1.10142426 | 1.2162279 |
| A_55_P1985 | 7752.8   | Detected | 6202.4  | Detected   | 6029.8  | Detected | 7040.8   | Detected   | Ranbp9        | 0.908162212 | 0.77775771 | 1.13517348 | 0.9721721 |

|            |                   |                   |                   |                   |               |             |            |            |           |
|------------|-------------------|-------------------|-------------------|-------------------|---------------|-------------|------------|------------|-----------|
| A_51_P2419 | 28.3 Detected     | 26.8 Detected     | 20.1 Detected     | 25.7 Not Detect   | Prss30        | 0.908127208 | 0.71024735 | 0.95895522 | 0.75      |
| A_52_P1795 | 1146.1 Detected   | 856.5 Detected    | 1072.5 Detected   | 1040.7 Detected   | Adnp2         | 0.908035948 | 0.93578222 | 1.2150613  | 1.2521891 |
| A_55_P1982 | 24220.8 Detected  | 23072.2 Detected  | 25432.8 Detected  | 21991.7 Detected  | H3f3b         | 0.907967532 | 1.05003964 | 0.95316875 | 1.1023136 |
| A_55_P2166 | 15.2 Detected     | 13.7 Not Detect   | 11.4 Not Detect   | 13.8 Not Detect   | Vmn2r111      | 0.907894737 | 0.75       | 1.00729927 | 0.8321168 |
| A_52_P5295 | 4164 Detected     | 3855.4 Detected   | 3754.9 Detected   | 3779.9 Detected   | Nsl1          | 0.907756964 | 0.90175312 | 0.98041708 | 0.9739327 |
| A_55_P2153 | 189835.9 Detected | 141460.6 Detected | 202827.3 Detected | 172323.8 Detected | Tubb4b        | 0.907751379 | 1.0684349  | 1.21817524 | 1.4338077 |
| A_55_P1988 | 100.8 Detected    | 59.2 Detected     | 51 Detected       | 91.5 Detected     | Psors1c2      | 0.907738095 | 0.50595238 | 1.54560811 | 0.8614865 |
| A_55_P2182 | 65 Detected       | 57 Detected       | 62.2 Detected     | 59 Detected       | P2rx2         | 0.907692308 | 0.95692308 | 1.03508772 | 1.0912281 |
| A_55_P2154 | 87.7 Detected     | 98.2 Detected     | 99.6 Detected     | 79.6 Detected     | Pex13         | 0.907639681 | 1.13568985 | 0.81059063 | 1.0142566 |
| A_66_P1259 | 712.4 Detected    | 586.8 Detected    | 741.5 Detected    | 646.6 Detected    | Hipk1         | 0.907636159 | 1.04084784 | 1.10190866 | 1.2636333 |
| A_55_P2017 | 2695.8 Detected   | 1869.5 Detected   | 3058.9 Detected   | 2446.8 Detected   | Nanp          | 0.907634097 | 1.134691   | 1.30879914 | 1.6362129 |
| A_66_P1006 | 7085.4 Detected   | 4553.7 Detected   | 6544.5 Detected   | 6430.9 Detected   | Xpa           | 0.907626951 | 0.92365992 | 1.4122362  | 1.437183  |
| A_55_P2042 | 86.6 Detected     | 144.2 Detected    | 99.9 Detected     | 78.6 Detected     | Pbrm1         | 0.907621247 | 1.15357968 | 0.54507628 | 0.6927878 |
| A_55_P1964 | 7449.2 Detected   | 8012.4 Detected   | 6497.1 Detected   | 6760.8 Detected   | Cnot8         | 0.907587392 | 0.87218762 | 0.84379212 | 0.8108806 |
| A_55_P2345 | 251 Detected      | 246.5 Detected    | 206.6 Detected    | 227.8 Detected    | 1700109K24Rik | 0.907569721 | 0.82310757 | 0.92413793 | 0.8381339 |
| A_55_P2004 | 11.9 Not Detect   | 29.6 Detected     | 15.6 Not Detect   | 10.8 Not Detect   | Crispld2      | 0.907563025 | 1.31092437 | 0.36486486 | 0.527027  |
| A_55_P2154 | 7561.1 Detected   | 8524.2 Detected   | 9514.2 Detected   | 6862.1 Detected   | Hagh          | 0.907553134 | 1.25830898 | 0.80501396 | 1.1161399 |
| A_55_P2167 | 322 Detected      | 321.6 Detected    | 241.9 Detected    | 292.2 Detected    | Rabgef1       | 0.907453416 | 0.75124224 | 0.90858209 | 0.7521766 |
| A_55_P1955 | 48095 Detected    | 53480.9 Detected  | 59450.9 Detected  | 43643.2 Detected  | LOC677113     | 0.907437364 | 1.23611394 | 0.81605209 | 1.1116286 |
| A_55_P1985 | 8645.3 Detected   | 11580.8 Detected  | 7267.3 Detected   | 7845 Detected     | Fam195b       | 0.90742947  | 0.84060704 | 0.67741434 | 0.62753   |
| A_51_P4778 | 2388.4 Detected   | 2080.5 Detected   | 1325.6 Detected   | 2167.2 Detected   | Klhl21        | 0.907385698 | 0.55501591 | 1.04167267 | 0.6371545 |
| A_55_P2185 | 297130.8 Detected | 287330 Detected   | 313585 Detected   | 269602.8 Detected | Rpl9          | 0.907353933 | 1.05537696 | 0.93830369 | 1.0913758 |
| A_55_P2094 | 963.6 Detected    | 733.9 Detected    | 1230.7 Detected   | 874.3 Detected    | Ralgs1        | 0.907326692 | 1.27718971 | 1.19130672 | 1.6769315 |
| A_51_P3866 | 4314.9 Detected   | 2066.7 Detected   | 2721.1 Detected   | 3914.7 Detected   | Pir           | 0.907251616 | 0.63062875 | 1.89417913 | 1.3166401 |
| A_55_P2139 | 89057.3 Detected  | 64369.5 Detected  | 57124.3 Detected  | 80794.6 Detected  | Plec          | 0.907220408 | 0.6414331  | 1.25516899 | 0.8874436 |
| A_55_P2183 | 9.7 Not Detect    | 18.7 Detected     | 3.4 Not Detect    | 8.8 Not Detect    | Sctr          | 0.907216495 | 0.35051546 | 0.47058824 | 0.1818182 |
| A_52_P4552 | 163.8 Detected    | 150 Detected      | 22.2 Detected     | 148.6 Detected    | Emx2          | 0.907203907 | 0.13553114 | 0.99066667 | 0.148     |
| A_55_P2108 | 674.3 Detected    | 757 Detected      | 668 Detected      | 611.7 Detected    | Sdad1         | 0.907162984 | 0.99065698 | 0.80805812 | 0.8824306 |
| A_55_P1987 | 4087.6 Detected   | 3247.9 Detected   | 3245.2 Detected   | 3707.8 Detected   | Ep400         | 0.907084842 | 0.7939133  | 1.14159919 | 0.9991687 |
| A_55_P2136 | 524.1 Detected    | 408.8 Detected    | 489.1 Detected    | 475.4 Detected    | Nsun6         | 0.907078802 | 0.93321885 | 1.16291585 | 1.1964286 |
| A_55_P2030 | 2997 Detected     | 3044.1 Detected   | 1647.5 Detected   | 2718.3 Detected   | Ankle1        | 0.907007007 | 0.54971638 | 0.89297329 | 0.5412109 |
| A_55_P2045 | 1736.6 Detected   | 594.8 Detected    | 225.2 Detected    | 1575.1 Detected   | I830127L07Rik | 0.907002188 | 0.12967868 | 2.64811701 | 0.3786147 |
| A_66_P1188 | 1118 Detected     | 653.3 Detected    | 811.8 Detected    | 1014 Detected     | Ncald         | 0.906976744 | 0.72611807 | 1.55212001 | 1.2426144 |
| A_51_P5013 | 3943.2 Detected   | 3295.7 Detected   | 3147.3 Detected   | 3576.3 Detected   | Gm16515       | 0.906953743 | 0.79815886 | 1.08514124 | 0.9549716 |
| A_52_P1976 | 4235.9 Detected   | 3562.1 Detected   | 3686.6 Detected   | 3841.7 Detected   | Umps          | 0.906938313 | 0.87032272 | 1.07849302 | 1.0349513 |
| A_51_P4610 | 5823.4 Detected   | 6071.5 Detected   | 3376.8 Detected   | 5281.3 Detected   | Ostm1         | 0.906910053 | 0.57986743 | 0.86985094 | 0.5561723 |
| A_52_P5814 | 24.7 Detected     | 22.1 Detected     | 21.2 Detected     | 22.4 Not Detect   | Aldh1a2       | 0.906882591 | 0.8582996  | 1.01357466 | 0.959276  |
| A_55_P2028 | 56973.6 Detected  | 54860.6 Detected  | 54918.8 Detected  | 51666.6 Detected  | Mgat1         | 0.906851594 | 0.96393417 | 0.94177971 | 1.0010609 |
| A_55_P2028 | 20159.3 Detected  | 16475.1 Detected  | 22353.9 Detected  | 18280.6 Detected  | Ptplb         | 0.90680728  | 1.10886291 | 1.10958962 | 1.3568294 |
| A_55_P2070 | 159.7 Detected    | 106.2 Detected    | 180.4 Detected    | 144.8 Detected    | Zfp59         | 0.906700063 | 1.12961803 | 1.36346516 | 1.6986817 |

|            |                   |                   |                   |                   |               |             |            |            |           |
|------------|-------------------|-------------------|-------------------|-------------------|---------------|-------------|------------|------------|-----------|
| A_66_P1159 | 881.4 Detected    | 519.7 Detected    | 601 Detected      | 799.1 Detected    | Myo9a         | 0.906625823 | 0.68186975 | 1.53761786 | 1.1564364 |
| A_55_P2107 | 471.9 Detected    | 658.8 Detected    | 456.4 Detected    | 427.8 Detected    | Myl4          | 0.906547997 | 0.96715406 | 0.64936248 | 0.6927747 |
| A_51_P3661 | 15920.7 Detected  | 14498.8 Detected  | 17963.1 Detected  | 14432.4 Detected  | Mpg           | 0.906517929 | 1.12828582 | 0.99542031 | 1.238937  |
| A_66_P1214 | 3285.4 Detected   | 3094.7 Detected   | 4262.3 Detected   | 2978.2 Detected   | Psat1         | 0.906495404 | 1.29734583 | 0.96235499 | 1.3772902 |
| A_52_P2218 | 159.3 Detected    | 141.4 Detected    | 135.7 Detected    | 144.4 Detected    | Trim23        | 0.906465788 | 0.85185185 | 1.02121641 | 0.9596888 |
| A_51_P3926 | 291810.2 Detected | 241956.1 Detected | 267614.5 Detected | 264515.5 Detected | Vim           | 0.906464202 | 0.91708412 | 1.09323757 | 1.1060457 |
| A_55_P2021 | 23410.5 Detected  | 14750.9 Detected  | 23799 Detected    | 21220.6 Detected  | Calm3         | 0.906456505 | 1.01659512 | 1.43859697 | 1.6133931 |
| A_55_P2156 | 310 Detected      | 337.5 Detected    | 87.4 Detected     | 281 Detected      | Sema6c        | 0.906451613 | 0.28193548 | 0.83259259 | 0.258963  |
| A_55_P2017 | 318.2 Detected    | 313.9 Detected    | 209.4 Detected    | 288.4 Detected    | A630089N07Rik | 0.906348209 | 0.65807668 | 0.91876394 | 0.6670914 |
| A_55_P2149 | 45.9 Detected     | 64.5 Detected     | 37.5 Detected     | 41.6 Not Detect   | Cmya5         | 0.906318083 | 0.81699346 | 0.64496124 | 0.5813953 |
| A_51_P2277 | 14119.9 Detected  | 12886.8 Detected  | 11717.8 Detected  | 12795.8 Detected  | Top2b         | 0.906224548 | 0.8298784  | 0.99293851 | 0.909287  |
| A_55_P2131 | 123218.4 Detected | 119573.7 Detected | 134480.8 Detected | 111661.8 Detected | Gm17014       | 0.906210436 | 1.09140193 | 0.93383244 | 1.1246687 |
| A_55_P1996 | 51112.8 Detected  | 49213.4 Detected  | 53818.6 Detected  | 46317.6 Detected  | Psme2b        | 0.90618397  | 1.05293782 | 0.9411583  | 1.0935761 |
| A_52_P3588 | 11494.6 Detected  | 8062.3 Detected   | 8100.5 Detected   | 10415.3 Detected  | Gss           | 0.906103736 | 0.70472222 | 1.2918522  | 1.0047381 |
| A_65_P0802 | 11944.9 Detected  | 9525.4 Detected   | 10971.7 Detected  | 10823.3 Detected  | Hnrnpk        | 0.906102186 | 0.9185259  | 1.13625675 | 1.1518361 |
| A_51_P2839 | 18.1 Detected     | 15.1 Not Detect   | 15.9 Not Detect   | 16.4 Not Detect   | Adamts18      | 0.906077348 | 0.87845304 | 1.08609272 | 1.0529801 |
| A_55_P2423 | 2892.2 Detected   | 2974.7 Detected   | 2336 Detected     | 2620.5 Detected   | Nf2           | 0.906057672 | 0.80768965 | 0.88092917 | 0.7852893 |
| A_51_P1230 | 31620.4 Detected  | 23910.5 Detected  | 35090.1 Detected  | 28648.5 Detected  | Nubp1         | 0.906013207 | 1.10972979 | 1.19815562 | 1.4675603 |
| A_65_P0745 | 129.8 Detected    | 67.8 Detected     | 57.8 Detected     | 117.6 Detected    | Gm13251       | 0.906009245 | 0.44530046 | 1.73451327 | 0.8525074 |
| A_55_P2071 | 85.1 Detected     | 91.1 Detected     | 180.3 Detected    | 77.1 Detected     | 1700020N15Rik | 0.905992949 | 2.1186839  | 0.84632272 | 1.9791438 |
| A_52_P1630 | 58.5 Detected     | 55.8 Detected     | 75.5 Detected     | 53 Not Detect     | Naif1         | 0.905982906 | 1.29059829 | 0.94982079 | 1.3530466 |
| A_51_P3146 | 16818 Detected    | 13592.7 Detected  | 15356 Detected    | 15234.9 Detected  | Rrn3          | 0.905868712 | 0.91306933 | 1.12081485 | 1.129724  |
| A_55_P2134 | 2083.1 Detected   | 2068.2 Detected   | 1575.8 Detected   | 1887 Detected     | Ankrd26       | 0.905861456 | 0.75646872 | 0.91238758 | 0.7619186 |
| A_55_P2154 | 645.8 Detected    | 547.9 Detected    | 567.9 Detected    | 585 Detected      | Mettl4        | 0.905853205 | 0.87937442 | 1.06771309 | 1.036503  |
| A_55_P2051 | 13.8 Not Detect   | 20.7 Detected     | 11.8 Not Detect   | 12.5 Not Detect   | AA066038      | 0.905797101 | 0.85507246 | 0.60386473 | 0.5700483 |
| A_55_P2314 | 24.4 Detected     | 26.7 Detected     | 18.6 Detected     | 22.1 Not Detect   | 4931403G20Rik | 0.905737705 | 0.76229508 | 0.82771536 | 0.6966292 |
| A_51_P4117 | 144.2 Detected    | 71.8 Detected     | 153 Detected      | 130.6 Detected    | 2900026A02Rik | 0.905686546 | 1.06102635 | 1.8189415  | 2.1309192 |
| A_55_P2144 | 132.5 Detected    | 128.6 Detected    | 145.6 Detected    | 120 Detected      | Pigc          | 0.905660377 | 1.09886792 | 0.93312597 | 1.1321928 |
| A_55_P2102 | 201364.2 Detected | 189376.7 Detected | 177498.4 Detected | 182360.6 Detected | Spag7         | 0.905625727 | 0.88147943 | 0.96295162 | 0.9372769 |
| A_55_P2002 | 6453 Detected     | 5703 Detected     | 4660.4 Detected   | 5843.4 Detected   | Zfp777        | 0.905532311 | 0.72220673 | 1.02461862 | 0.8171839 |
| A_55_P2433 | 1562.8 Detected   | 1285.8 Detected   | 1215 Detected     | 1415.1 Detected   | Tcf12         | 0.905490146 | 0.77745073 | 1.10055996 | 0.944937  |
| A_51_P4178 | 908.8 Detected    | 630.5 Detected    | 1133.9 Detected   | 822.9 Detected    | Zfp825        | 0.905479754 | 1.24768926 | 1.30515464 | 1.798414  |
| A_55_P2117 | 32444.2 Detected  | 43620.8 Detected  | 35960.5 Detected  | 29377.4 Detected  | Npm1          | 0.90547463  | 1.10837993 | 0.67347229 | 0.8243888 |
| A_55_P2130 | 20.1 Detected     | 26.4 Detected     | 14.1 Not Detect   | 18.2 Not Detect   | Gpr44         | 0.905472637 | 0.70149254 | 0.68939394 | 0.5340909 |
| A_51_P5026 | 22003.7 Detected  | 34252.2 Detected  | 16152.8 Detected  | 19922.8 Detected  | Dusp6         | 0.905429541 | 0.73409472 | 0.58165023 | 0.4715843 |
| A_55_P2149 | 1819.1 Detected   | 1574 Detected     | 2440.6 Detected   | 1647 Detected     | BC055324      | 0.905392777 | 1.34165247 | 1.04637865 | 1.5505718 |
| A_51_P2086 | 3523.3 Detected   | 3148 Detected     | 3169.8 Detected   | 3189.8 Detected   | Ttl           | 0.905344421 | 0.89966792 | 1.01327827 | 1.006925  |
| A_55_P2154 | 16973.2 Detected  | 20903.9 Detected  | 20506.2 Detected  | 15365.6 Detected  | Rpap3         | 0.90528598  | 1.20815167 | 0.73505901 | 0.9809748 |
| A_52_P1314 | 845.5 Detected    | 971 Detected      | 632.3 Detected    | 765.4 Detected    | Ttc39b        | 0.905263158 | 0.74784151 | 0.78825953 | 0.6511843 |
| A_51_P4364 | 4543.1 Detected   | 2994.2 Detected   | 4470.3 Detected   | 4112.7 Detected   | Kin           | 0.905262926 | 0.9839757  | 1.37355554 | 1.4929864 |

|            |          |          |          |          |          |            |          |            |               |             |            |            |           |
|------------|----------|----------|----------|----------|----------|------------|----------|------------|---------------|-------------|------------|------------|-----------|
| A_52_P6807 | 5836.9   | Detected | 6404.1   | Detected | 5401.7   | Detected   | 5283.9   | Detected   | Kpna3         | 0.905257928 | 0.92543987 | 0.82508081 | 0.8434753 |
| A_51_P3247 | 21277.7  | Detected | 22051.6  | Detected | 30191.7  | Detected   | 19260.8  | Detected   | Mrpl16        | 0.90521062  | 1.41893626 | 0.87344229 | 1.3691387 |
| A_55_P1981 | 1018.3   | Detected | 735.2    | Detected | 764.8    | Detected   | 921.7    | Detected   | Rreb1         | 0.905136011 | 0.75105568 | 1.25367247 | 1.0402612 |
| A_51_P1230 | 34119.7  | Detected | 25196.5  | Detected | 24850.5  | Detected   | 30881.7  | Detected   | Smc1a         | 0.905098814 | 0.7283329  | 1.22563451 | 0.9862679 |
| A_55_P2005 | 96.9     | Detected | 52.7     | Detected | 78.2     | Detected   | 87.7     | Detected   | Zfp455        | 0.90505676  | 0.80701754 | 1.66413662 | 1.483871  |
| A_55_P2165 | 169.2    | Detected | 132.5    | Detected | 110.8    | Detected   | 153.1    | Detected   | Ncor1         | 0.904846336 | 0.65484634 | 1.1554717  | 0.8362264 |
| A_51_P3530 | 8233.6   | Detected | 6668.9   | Detected | 6158.8   | Detected   | 7449.9   | Detected   | Zfyve27       | 0.904816848 | 0.74800816 | 1.11711077 | 0.9235106 |
| A_51_P4767 | 18495.4  | Detected | 17546.7  | Detected | 17143.3  | Detected   | 16734.6  | Detected   | Skiv2l2       | 0.90479795  | 0.92689534 | 0.95371779 | 0.9770099 |
| A_55_P2122 | 335.6    | Detected | 228      | Detected | 271.2    | Detected   | 303.6    | Detected   | Homer1        | 0.904648391 | 0.80810489 | 1.33157895 | 1.1894737 |
| A_52_P1882 | 5592.1   | Detected | 3313.7   | Detected | 4825.8   | Detected   | 5058.6   | Detected   | Camk2d        | 0.904597557 | 0.8629674  | 1.52657151 | 1.4563177 |
| A_55_P2051 | 3643.1   | Detected | 3098.5   | Detected | 3686.2   | Detected   | 3295.5   | Detected   | Zfp598        | 0.904586753 | 1.01183058 | 1.06357915 | 1.1896724 |
| A_55_P1956 | 696.9    | Detected | 580.3    | Detected | 525      | Detected   | 630.4    | Detected   | Egfr          | 0.904577414 | 0.7533362  | 1.08633465 | 0.9047045 |
| A_55_P2065 | 123702.2 | Detected | 111893.2 | Detected | 134557.3 | Detected   | 111887.7 | Detected   | Gm14439       | 0.904492402 | 1.08775188 | 0.99995085 | 1.2025512 |
| A_66_P1135 | 80.6     | Detected | 81.5     | Detected | 75.4     | Detected   | 72.9     | Detected   | Wnt16         | 0.904466501 | 0.93548387 | 0.89447853 | 0.9251534 |
| A_55_P2056 | 1990.1   | Detected | 2661.5   | Detected | 1007.3   | Detected   | 1799.9   | Compromis  | Col16a1       | 0.904426913 | 0.50615547 | 0.67627278 | 0.3784708 |
| A_55_P1962 | 23757.3  | Detected | 20469.9  | Detected | 19815.8  | Detected   | 21485.3  | Detected   | Sec23b        | 0.904366237 | 0.8340931  | 1.04960454 | 0.9680458 |
| A_55_P2008 | 743.2    | Detected | 524.6    | Detected | 510.3    | Detected   | 672.1    | Detected   | Rad51         | 0.904332616 | 0.6866254  | 1.2811666  | 0.9727411 |
| A_55_P2033 | 402.3    | Detected | 483.1    | Detected | 479.1    | Detected   | 363.8    | Detected   | Med4          | 0.904300273 | 1.19090231 | 0.7530532  | 0.9917201 |
| A_55_P2024 | 6728.4   | Detected | 7019     | Detected | 4747.4   | Detected   | 6084.4   | Detected   | 4933427D14Rik | 0.904286309 | 0.70557636 | 0.86684713 | 0.6763642 |
| A_55_P2147 | 1940.1   | Detected | 1885.2   | Detected | 2485.4   | Detected   | 1754.2   | Detected   | Caprin2       | 0.904180197 | 1.28106799 | 0.93051135 | 1.3183747 |
| A_55_P2079 | 2076.7   | Detected | 1553.9   | Detected | 1892.6   | Detected   | 1877.7   | Detected   | Ggps1         | 0.904174893 | 0.91134974 | 1.20837892 | 1.2179677 |
| A_55_P2044 | 24       | Detected | 20.6     | Detected | 15.2     | Not Detect | 21.7     | Not Detect | D4Erdt617e    | 0.904166667 | 0.63333333 | 1.05339806 | 0.7378641 |
| A_66_P1357 | 110.6    | Detected | 69.9     | Detected | 63.5     | Detected   | 100      | Detected   | Stx2          | 0.904159132 | 0.57414105 | 1.43061516 | 0.9084406 |
| A_55_P2084 | 412962.5 | Detected | 337476.5 | Detected | 391867.8 | Detected   | 373356.6 | Detected   | Hist1h2ak     | 0.904093229 | 0.94891861 | 1.10631881 | 1.1611706 |
| A_55_P2133 | 103.2    | Detected | 112.4    | Detected | 74.6     | Detected   | 93.3     | Detected   | Usp36         | 0.904069767 | 0.72286822 | 0.83007117 | 0.6637011 |
| A_55_P2069 | 27.1     | Detected | 31.4     | Detected | 25.4     | Detected   | 24.5     | Not Detect | D5Erdt577e    | 0.904059041 | 0.93726937 | 0.78025478 | 0.8089172 |
| A_55_P2037 | 77.1     | Detected | 63       | Detected | 83.6     | Detected   | 69.7     | Detected   | Sec14l5       | 0.904020752 | 1.0843061  | 1.10634921 | 1.3269841 |
| A_51_P3121 | 1031.2   | Detected | 980.9    | Detected | 789.4    | Detected   | 932.2    | Detected   | Zfr           | 0.903995345 | 0.7655159  | 0.95035172 | 0.8047711 |
| A_55_P2163 | 4811     | Detected | 3670.9   | Detected | 3805     | Detected   | 4349.1   | Detected   | Tgm3          | 0.903990854 | 0.79089586 | 1.18475033 | 1.0365306 |
| A_51_P3996 | 80023.1  | Detected | 82063    | Detected | 84850.2  | Detected   | 72339.4  | Detected   | Cnih1         | 0.903981475 | 1.06032133 | 0.88151055 | 1.0339641 |
| A_55_P1982 | 123.9    | Detected | 110.6    | Detected | 127.7    | Detected   | 112      | Detected   | Homer1        | 0.903954802 | 1.0306699  | 1.01265823 | 1.1546112 |
| A_55_P2171 | 38739.8  | Detected | 26868.7  | Detected | 34473.3  | Detected   | 35015    | Detected   | Nptn          | 0.90385082  | 0.88986778 | 1.30318921 | 1.2830282 |
| A_51_P3260 | 139.3    | Detected | 102.9    | Detected | 159.3    | Detected   | 125.9    | Detected   | Hydin         | 0.903804738 | 1.14357502 | 1.22351798 | 1.548105  |
| A_66_P1155 | 4276.3   | Detected | 3500     | Detected | 3570.3   | Detected   | 3864.9   | Detected   | Gm11240       | 0.903795337 | 0.83490401 | 1.10425714 | 1.0200857 |
| A_66_P1380 | 552.7    | Detected | 517.6    | Detected | 418.3    | Detected   | 499.5    | Detected   | Gm12298       | 0.903745251 | 0.75683011 | 0.96503091 | 0.808153  |
| A_51_P3929 | 41.5     | Detected | 37.9     | Detected | 66.1     | Detected   | 37.5     | Not Detect | Zmynd10       | 0.903614458 | 1.59277108 | 0.98944591 | 1.7440633 |
| A_52_P3841 | 19.7     | Detected | 37       | Detected | 26.7     | Detected   | 17.8     | Not Detect | Anapc7        | 0.903553299 | 1.35532995 | 0.48108108 | 0.7216216 |
| A_55_P2162 | 2328.5   | Detected | 1638.4   | Detected | 2439.4   | Detected   | 2103.9   | Detected   | Tm9sf3        | 0.903543053 | 1.04762723 | 1.28411865 | 1.4888916 |
| A_55_P2024 | 20193    | Detected | 12695.2  | Detected | 17072    | Detected   | 18245    | Detected   | Spin1         | 0.903530927 | 0.84544149 | 1.43715735 | 1.3447602 |
| A_55_P2057 | 17137.7  | Detected | 13929.6  | Detected | 15002.2  | Detected   | 15483.8  | Detected   | Cetn2         | 0.903493468 | 0.87539168 | 1.11157535 | 1.0770015 |

|            |                  |                  |                  |                   |           |             |            |            |           |
|------------|------------------|------------------|------------------|-------------------|-----------|-------------|------------|------------|-----------|
| A_55_P2171 | 25.9 Detected    | 19.9 Detected    | 28.3 Detected    | 23.4 Not Detect   | Gm13180   | 0.903474903 | 1.09266409 | 1.1758794  | 1.4221106 |
| A_55_P2124 | 45.5 Detected    | 27.3 Detected    | 32.6 Detected    | 41.1 Not Detect   | Tceanc    | 0.903296703 | 0.71648352 | 1.50549451 | 1.1941392 |
| A_55_P2079 | 91 Detected      | 72 Detected      | 69 Detected      | 82.2 Detected     | Ankrd33b  | 0.903296703 | 0.75824176 | 1.14166667 | 0.9583333 |
| A_51_P4258 | 2085.7 Detected  | 1720 Detected    | 1990 Detected    | 1884 Detected     | Lztf11    | 0.903293858 | 0.95411612 | 1.09534884 | 1.1569767 |
| A_51_P2396 | 113657 Detected  | 77966.5 Detected | 88818.6 Detected | 102664.3 Detected | Hprt      | 0.903281804 | 0.78146177 | 1.31677451 | 1.1391893 |
| A_52_P7546 | 6675.7 Detected  | 6580 Detected    | 5393.1 Detected  | 6029.6 Detected   | Gdpd1     | 0.903216142 | 0.80787034 | 0.91635258 | 0.8196201 |
| A_55_P2162 | 24173.2 Detected | 22469.3 Detected | 25721.5 Detected | 21833.5 Detected  | Mpdu1     | 0.903210994 | 1.06405027 | 0.97170361 | 1.1447397 |
| A_52_P5798 | 9117.4 Detected  | 7411.1 Detected  | 9177.2 Detected  | 8234.9 Detected   | Suds3     | 0.903207055 | 1.00655889 | 1.11115759 | 1.2383047 |
| A_52_P4726 | 2083.1 Detected  | 1695.5 Detected  | 1547.7 Detected  | 1881.3 Detected   | Smurf2    | 0.90312515  | 0.74297921 | 1.10958419 | 0.9128281 |
| A_55_P1978 | 474.8 Detected   | 480 Detected     | 375.3 Detected   | 428.8 Detected    | Srsf10    | 0.903117102 | 0.79043808 | 0.89333333 | 0.781875  |
| A_51_P1093 | 25.8 Detected    | 47.2 Detected    | 51.3 Detected    | 23.3 Not Detect   | Fbxo32    | 0.903100775 | 1.98837209 | 0.49364407 | 1.0868644 |
| A_55_P1980 | 2733.3 Detected  | 1579.5 Detected  | 1869.3 Detected  | 2468.4 Detected   | Ephb6     | 0.903084184 | 0.68389858 | 1.56277303 | 1.1834758 |
| A_55_P1990 | 21677.5 Detected | 17229.1 Detected | 15741.9 Detected | 19576.5 Detected  | Ube2j1    | 0.90307923  | 0.72618614 | 1.13624623 | 0.9136809 |
| A_55_P1964 | 66921.1 Detected | 53767.2 Detected | 55858.8 Detected | 60434.9 Detected  | Fus       | 0.903076907 | 0.83469638 | 1.12401055 | 1.038901  |
| A_55_P2120 | 9944.9 Detected  | 9518.9 Detected  | 10586.6 Detected | 8980.8 Detected   | Dctn4     | 0.903055838 | 1.06452554 | 0.94347036 | 1.1121663 |
| A_51_P1800 | 7837 Detected    | 7323.9 Detected  | 6219.4 Detected  | 7077.2 Detected   | Ago2      | 0.903049636 | 0.79359449 | 0.96631576 | 0.8491924 |
| A_55_P2052 | 16.5 Detected    | 17.5 Detected    | 5 Not Detect     | 14.9 Not Detect   | Olf1r1382 | 0.903030303 | 0.3030303  | 0.85142857 | 0.2857143 |
| A_55_P1990 | 38313.3 Detected | 28059.5 Detected | 32376.1 Detected | 34594.2 Detected  | Comt      | 0.90292927  | 0.84503554 | 1.23288726 | 1.1538374 |
| A_55_P1960 | 558.1 Detected   | 535.9 Detected   | 755 Detected     | 503.9 Detected    | Pih1d2    | 0.902884788 | 1.35280416 | 0.94028737 | 1.4088449 |
| A_52_P1614 | 6934.2 Detected  | 6010.2 Detected  | 4374.1 Detected  | 6260 Detected     | Cnpy4     | 0.902771769 | 0.63080096 | 1.04156268 | 0.7277794 |
| A_55_P2025 | 9246.7 Detected  | 5093.4 Detected  | 6503.7 Detected  | 8346.5 Detected   | Nkain1    | 0.90264635  | 0.70335363 | 1.63868928 | 1.2768877 |
| A_55_P2004 | 10528.9 Detected | 7605.8 Detected  | 11132.9 Detected | 9503.7 Detected   | Gm10015   | 0.902629904 | 1.05736592 | 1.24953325 | 1.4637382 |
| A_55_P2166 | 29655.7 Detected | 30894.9 Detected | 30190.1 Detected | 26767.9 Detected  | Cdk4      | 0.90262243  | 1.01802014 | 0.86641808 | 0.9771872 |
| A_55_P2022 | 262.8 Detected   | 214.8 Detected   | 248.5 Detected   | 237.2 Detected    | Olf1r212  | 0.902587519 | 0.945586   | 1.10428305 | 1.1568901 |
| A_52_P1808 | 14040.5 Detected | 12216.9 Detected | 16305.8 Detected | 12672.5 Detected  | Ndufaf7   | 0.902567572 | 1.16134041 | 1.0372926  | 1.3346921 |
| A_55_P2121 | 681.4 Detected   | 682.7 Detected   | 698.4 Detected   | 615 Detected      | Ankfy1    | 0.902553566 | 1.02494864 | 0.90083492 | 1.0229969 |
| A_51_P4750 | 10672.1 Detected | 8553.2 Detected  | 9672.7 Detected  | 9632 Detected     | Vbp1      | 0.902540269 | 0.90635395 | 1.12612823 | 1.1308867 |
| A_66_P1062 | 725.3 Detected   | 790.7 Detected   | 576.3 Detected   | 654.6 Detected    | Mutyh     | 0.902523094 | 0.79456777 | 0.82787404 | 0.7288479 |
| A_51_P2327 | 3168.8 Detected  | 2209.9 Detected  | 2359.5 Detected  | 2859.8 Detected   | Hiat11    | 0.902486746 | 0.74460364 | 1.29408571 | 1.0676954 |
| A_52_P3276 | 145.6 Detected   | 95.5 Detected    | 113.7 Detected   | 131.4 Detected    | Gm9993    | 0.902472527 | 0.78090659 | 1.37591623 | 1.1905759 |
| A_52_P1826 | 228.5 Detected   | 198.6 Detected   | 162.7 Detected   | 206.2 Detected    | Brca1     | 0.902407002 | 0.71203501 | 1.03826788 | 0.8192346 |
| A_55_P1972 | 103.4 Detected   | 82.3 Detected    | 143 Detected     | 93.3 Detected     | Tgif2     | 0.902321083 | 1.38297872 | 1.13365735 | 1.7375456 |
| A_51_P4404 | 1748.3 Detected  | 1031.9 Detected  | 1276.5 Detected  | 1577.5 Detected   | Hip1r     | 0.902305096 | 0.73013785 | 1.5287334  | 1.2370385 |
| A_51_P3943 | 18018.1 Detected | 16323.7 Detected | 18020.7 Detected | 16256.1 Detected  | Eif2b1    | 0.902209445 | 1.0001443  | 0.99585878 | 1.1039593 |
| A_52_P1090 | 10183.6 Detected | 6303.4 Detected  | 8194.6 Detected  | 9187.6 Detected   | Hipk3     | 0.902195687 | 0.80468597 | 1.45756259 | 1.3000286 |
| A_55_P2168 | 421.9 Detected   | 476.6 Detected   | 513.7 Detected   | 380.6 Detected    | Cul2      | 0.902109505 | 1.21758711 | 0.79857323 | 1.0778431 |
| A_55_P2088 | 172.5 Detected   | 123.2 Detected   | 114.2 Detected   | 155.6 Detected    | Krtap4-1  | 0.902028986 | 0.66202899 | 1.26298701 | 0.9269481 |
| A_55_P2060 | 19263.5 Detected | 10315.4 Detected | 12999.5 Detected | 17376.2 Detected  | Lzts2     | 0.90202715  | 0.67482545 | 1.68449115 | 1.2602032 |
| A_55_P1963 | 645 Detected     | 401.1 Detected   | 286 Detected     | 581.8 Detected    | Arhgef17  | 0.902015504 | 0.44341085 | 1.45051109 | 0.7130391 |
| A_55_P2044 | 736.6 Detected   | 630.5 Detected   | 689.1 Detected   | 664.4 Detected    | Bphl      | 0.90198208  | 0.93551453 | 1.05376685 | 1.0929421 |

|            |          |            |          |            |          |            |          |            |               |             |            |            |           |
|------------|----------|------------|----------|------------|----------|------------|----------|------------|---------------|-------------|------------|------------|-----------|
| A_52_P4831 | 4234.3   | Detected   | 5083.2   | Detected   | 4044.7   | Detected   | 3818.8   | Detected   | Utp23         | 0.901872801 | 0.95522282 | 0.75125905 | 0.7956996 |
| A_55_P2055 | 1893.8   | Detected   | 1307.1   | Detected   | 1481.9   | Detected   | 1707.9   | Detected   | Ppip5k1       | 0.901837575 | 0.78250079 | 1.306633   | 1.1337312 |
| A_66_P1035 | 11.2     | Not Detect | 9.3      | Not Detect | 22.2     | Detected   | 10.1     | Not Detect | Gm9376        | 0.901785714 | 1.98214286 | 1.08602151 | 2.3870968 |
| A_51_P4862 | 46.7     | Detected   | 38.8     | Detected   | 50.7     | Detected   | 42.1     | Not Detect | Clec3b        | 0.901498929 | 1.0856531  | 1.08505155 | 1.306701  |
| A_55_P2108 | 5330.8   | Detected   | 3532.7   | Detected   | 4897.2   | Detected   | 4805.6   | Detected   | Tubgcp4       | 0.901478202 | 0.91866136 | 1.3603193  | 1.3862485 |
| A_55_P2211 | 17303    | Detected   | 13754    | Detected   | 14254    | Detected   | 15598.1  | Detected   | Map3k4        | 0.901467954 | 0.82378778 | 1.13407736 | 1.0363531 |
| A_55_P2048 | 316987.2 | Detected   | 304734.2 | Detected   | 335032.4 | Detected   | 285744.6 | Detected   | Rps2          | 0.901438922 | 1.05692722 | 0.93768471 | 1.099425  |
| A_55_P1961 | 242.4    | Detected   | 221.1    | Detected   | 268.2    | Detected   | 218.5    | Detected   | Pygm          | 0.90140264  | 1.10643564 | 0.98824062 | 1.2130258 |
| A_51_P4368 | 4378.7   | Detected   | 3700.3   | Detected   | 2356.9   | Detected   | 3946.7   | Detected   | Dos           | 0.901340581 | 0.53826478 | 1.0665892  | 0.6369484 |
| A_55_P1968 | 3404.6   | Detected   | 2775.7   | Detected   | 2510.8   | Detected   | 3068.7   | Detected   | Jmjd1c        | 0.901339364 | 0.73747283 | 1.10555896 | 0.9045646 |
| A_55_P2076 | 4068.4   | Detected   | 3930.4   | Detected   | 3738.9   | Detected   | 3666.9   | Detected   | Ddx5          | 0.901312555 | 0.91900993 | 0.93295848 | 0.9512772 |
| A_66_P1209 | 20188.4  | Detected   | 21512.5  | Detected   | 21209.3  | Detected   | 18195.8  | Detected   | Atxn10        | 0.901299756 | 1.05056864 | 0.84582452 | 0.9859059 |
| A_55_P2212 | 215.8    | Detected   | 193.2    | Detected   | 160.7    | Detected   | 194.5    | Detected   | Apba2         | 0.901297498 | 0.74467099 | 1.00672878 | 0.8317805 |
| A_55_P2021 | 11591.8  | Detected   | 8731.4   | Detected   | 7617.7   | Detected   | 10447.5  | Detected   | Tmem181a      | 0.901283666 | 0.65716282 | 1.19654351 | 0.8724489 |
| A_55_P2103 | 5667.9   | Detected   | 4087.7   | Detected   | 4132.6   | Detected   | 5108.1   | Detected   | Gtf2ird1      | 0.901233261 | 0.72912366 | 1.24962693 | 1.0109842 |
| A_55_P2024 | 2591.4   | Detected   | 2534.8   | Detected   | 2235     | Detected   | 2335.4   | Detected   | Atxn7l1       | 0.9012117   | 0.86246816 | 0.92133502 | 0.8817264 |
| A_51_P4930 | 1515     | Detected   | 1211.2   | Detected   | 1415.1   | Detected   | 1365.3   | Detected   | Dclre1a       | 0.901188119 | 0.93405941 | 1.12722919 | 1.1683454 |
| A_51_P4666 | 26.3     | Detected   | 23       | Detected   | 13.1     | Not Detect | 23.7     | Not Detect | Fbxl22        | 0.901140684 | 0.49809886 | 1.03043478 | 0.5695652 |
| A_55_P1981 | 18.2     | Detected   | 5.8      | Not Detect | 3.6      | Not Detect | 16.4     | Not Detect | Dtx2          | 0.901098901 | 0.1978022  | 2.82758621 | 0.6206897 |
| A_55_P1967 | 36.4     | Detected   | 18       | Not Detect | 31.7     | Detected   | 32.8     | Not Detect | Nell1         | 0.901098901 | 0.87087912 | 1.82222222 | 1.7611111 |
| A_55_P2457 | 2111.7   | Detected   | 1858.6   | Detected   | 2004.2   | Detected   | 1902.6   | Detected   | G2e3          | 0.900980253 | 0.94909315 | 1.02367373 | 1.0783385 |
| A_55_P2150 | 37827.1  | Detected   | 29694    | Detected   | 44481.4  | Detected   | 34080.7  | Detected   | Atp5c1        | 0.900959894 | 1.17591356 | 1.14773018 | 1.4979929 |
| A_55_P2097 | 11.1     | Not Detect | 8.7      | Not Detect | 19.4     | Detected   | 10       | Not Detect | Olfrl287      | 0.900900901 | 1.74774775 | 1.14942529 | 2.2298851 |
| A_52_P5261 | 11.1     | Not Detect | 46.8     | Detected   | 7.1      | Not Detect | 10       | Not Detect | Csf2rb        | 0.900900901 | 0.63963964 | 0.21367521 | 0.1517094 |
| A_55_P1990 | 322484   | Detected   | 303829   | Detected   | 315129   | Detected   | 290477.2 | Detected   | Rpl6          | 0.900749184 | 0.97719267 | 0.95605489 | 1.037192  |
| A_51_P2570 | 689.6    | Detected   | 644.1    | Detected   | 752.8    | Detected   | 621.1    | Detected   | Prpf40b       | 0.900667053 | 1.09164733 | 0.96429126 | 1.1687626 |
| A_55_P2164 | 65.3     | Detected   | 870.8    | Detected   | 81.6     | Detected   | 58.8     | Detected   | Asb16         | 0.900459418 | 1.24961715 | 0.06752412 | 0.0937069 |
| A_55_P2201 | 22.1     | Detected   | 30.8     | Detected   | 30.7     | Detected   | 19.9     | Not Detect | 4930571K23Rik | 0.900452489 | 1.38914027 | 0.6461039  | 0.9967532 |
| A_55_P2182 | 1142.8   | Detected   | 700.1    | Detected   | 935.6    | Detected   | 1029     | Detected   | Sim2          | 0.900420021 | 0.81869093 | 1.46979003 | 1.3363805 |
| A_51_P1416 | 2696.7   | Detected   | 1800.3   | Detected   | 2413.5   | Detected   | 2428.1   | Detected   | Cables2       | 0.900396781 | 0.89498276 | 1.34871966 | 1.3406099 |
| A_66_P1055 | 307.2    | Detected   | 338.3    | Detected   | 209      | Detected   | 276.6    | Detected   | Gjc2          | 0.900390625 | 0.68033854 | 0.8176175  | 0.6177949 |
| A_51_P1445 | 17500.9  | Detected   | 17978.3  | Detected   | 15251.1  | Detected   | 15756.2  | Detected   | Rbm19         | 0.900307984 | 0.87144661 | 0.87640099 | 0.848306  |
| A_51_P4776 | 34.1     | Detected   | 1119.9   | Detected   | 8.1      | Not Detect | 30.7     | Not Detect | Prss12        | 0.900293255 | 0.23753666 | 0.02741316 | 0.0072328 |
| A_55_P2294 | 3210     | Detected   | 2670.6   | Detected   | 3785.4   | Detected   | 2889.9   | Detected   | Tmem2         | 0.900280374 | 1.17925234 | 1.08211638 | 1.4174343 |
| A_55_P2144 | 2210.3   | Detected   | 2055.4   | Detected   | 2077.1   | Detected   | 1989.8   | Detected   | Gfer          | 0.900239786 | 0.93973669 | 0.96808407 | 1.0105576 |
| A_55_P2161 | 229.5    | Detected   | 193.9    | Detected   | 114.1    | Detected   | 206.6    | Detected   | Dst           | 0.900217865 | 0.49716776 | 1.06549768 | 0.5884477 |
| A_55_P2078 | 17093.1  | Detected   | 16070.9  | Detected   | 17810.5  | Detected   | 15386.8  | Detected   | Rgs19         | 0.900176094 | 1.04197015 | 0.95743238 | 1.1082453 |
| A_55_P1977 | 1899.1   | Detected   | 1544.7   | Detected   | 2195.4   | Detected   | 1709.3   | Detected   | Zbtb9         | 0.900057922 | 1.15602127 | 1.10655791 | 1.4212468 |
| A_55_P2000 | 89180.4  | Detected   | 87882.5  | Detected   | 92955.9  | Detected   | 80259.5  | Detected   | Atox1         | 0.89996793  | 1.04233554 | 0.91325918 | 1.0577294 |
| A_55_P2068 | 190.9    | Detected   | 150.6    | Detected   | 141.5    | Detected   | 171.8    | Detected   | Gm10428       | 0.899947617 | 0.74122577 | 1.14077025 | 0.939575  |

|            |          |            |          |            |          |            |          |            |               |             |            |            |           |
|------------|----------|------------|----------|------------|----------|------------|----------|------------|---------------|-------------|------------|------------|-----------|
| A_55_P2044 | 2684.2   | Detected   | 2274.5   | Detected   | 2511.7   | Detected   | 2415.5   | Detected   | Pramef8       | 0.899895686 | 0.93573504 | 1.06199165 | 1.1042867 |
| A_55_P1979 | 56387.9  | Detected   | 44971.5  | Detected   | 43308.8  | Detected   | 50742.1  | Detected   | Cyba          | 0.899875683 | 0.7680513  | 1.12831682 | 0.9630277 |
| A_66_P1213 | 58.9     | Detected   | 67       | Detected   | 42.7     | Detected   | 53       | Detected   | Olf1251       | 0.899830221 | 0.72495756 | 0.79104478 | 0.6373134 |
| A_55_P2025 | 30362.7  | Detected   | 22235.6  | Detected   | 29128.3  | Detected   | 27319.7  | Detected   | Mrpl40        | 0.899778346 | 0.95934485 | 1.22864685 | 1.3099849 |
| A_51_P2920 | 14756.3  | Detected   | 14687.6  | Detected   | 15079.4  | Detected   | 13277    | Detected   | Nus1          | 0.899751293 | 1.02189573 | 0.9039598  | 1.0266756 |
| A_55_P2166 | 358.1    | Detected   | 350.9    | Detected   | 306.5    | Detected   | 322.2    | Detected   | Srrm2         | 0.899748674 | 0.85590617 | 0.91821032 | 0.8734682 |
| A_55_P2039 | 13071.9  | Detected   | 13483.1  | Detected   | 10990    | Detected   | 11760.7  | Detected   | Drosha        | 0.899693235 | 0.84073471 | 0.8722549  | 0.8150945 |
| A_55_P2161 | 29.9     | Detected   | 31       | Detected   | 3.7      | Not Detect | 26.9     | Not Detect | Thsd7a        | 0.899665552 | 0.12374582 | 0.86774194 | 0.1193548 |
| A_55_P1964 | 7160     | Detected   | 5962.8   | Detected   | 9578     | Detected   | 6441.6   | Detected   | Tprkb         | 0.899664804 | 1.3377095  | 1.08029785 | 1.6062923 |
| A_55_P2457 | 1655.3   | Detected   | 1361.4   | Detected   | 1546     | Detected   | 1489.2   | Detected   | G2e3          | 0.899655652 | 0.93396967 | 1.09387395 | 1.1355957 |
| A_55_P1958 | 37247.5  | Detected   | 41792.9  | Detected   | 36181.1  | Detected   | 33509.6  | Detected   | Ddx24         | 0.899646956 | 0.97136989 | 0.80180126 | 0.8657236 |
| A_55_P2226 | 98.6     | Detected   | 73.5     | Detected   | 70.3     | Detected   | 88.7     | Detected   | B930078G14Rik | 0.89959432  | 0.71298174 | 1.20680272 | 0.9564626 |
| A_51_P3530 | 5386.8   | Detected   | 5410.1   | Detected   | 7361.9   | Detected   | 4845.9   | Detected   | Minpp1        | 0.899587881 | 1.36665553 | 0.89571357 | 1.3607697 |
| A_55_P2119 | 20.9     | Detected   | 23.5     | Detected   | 21.7     | Detected   | 18.8     | Not Detect | Vma21         | 0.899521531 | 1.03827751 | 0.8        | 0.9234043 |
| A_55_P2038 | 122.4    | Detected   | 89.9     | Detected   | 107.5    | Detected   | 110.1    | Detected   | Tmem104       | 0.899509804 | 0.87826797 | 1.2246941  | 1.1957731 |
| A_55_P1986 | 153.2    | Detected   | 184      | Detected   | 193      | Detected   | 137.8    | Detected   | Brd8          | 0.899477807 | 1.25979112 | 0.74891304 | 1.048913  |
| A_52_P1797 | 129.3    | Detected   | 150.8    | Detected   | 97.1     | Detected   | 116.3    | Detected   | Ripk2         | 0.899458623 | 0.75096674 | 0.77122016 | 0.6438992 |
| A_55_P2008 | 3373.3   | Detected   | 2477.5   | Detected   | 2317.7   | Detected   | 3033.7   | Detected   | Esr2          | 0.899327068 | 0.68707201 | 1.2245005  | 0.9354995 |
| A_66_P1025 | 11348.8  | Detected   | 8966.2   | Detected   | 9104.9   | Detected   | 10206.1  | Detected   | Ube2z         | 0.89931094  | 0.80227866 | 1.13828601 | 1.0154692 |
| A_55_P1958 | 13.9     | Not Detect | 12       | Not Detect | 22.1     | Detected   | 12.5     | Not Detect | Sgce          | 0.899280576 | 1.58992806 | 1.04166667 | 1.8416667 |
| A_55_P2148 | 913.3    | Detected   | 1014.8   | Detected   | 837.5    | Detected   | 821.3    | Detected   | Rab4a         | 0.899266397 | 0.91700427 | 0.80932203 | 0.8252858 |
| A_51_P2849 | 5294.9   | Detected   | 3141.5   | Detected   | 4793     | Detected   | 4761.5   | Detected   | Rnd3          | 0.899261554 | 0.90521067 | 1.51567722 | 1.5257043 |
| A_55_P2175 | 1503.8   | Detected   | 914.2    | Detected   | 1418.2   | Detected   | 1352.2   | Detected   | Atf2          | 0.899188722 | 0.94307754 | 1.47910742 | 1.5513017 |
| A_51_P1312 | 21.8     | Detected   | 32.5     | Detected   | 12.9     | Not Detect | 19.6     | Not Detect | Usp54         | 0.899082569 | 0.59174312 | 0.60307692 | 0.3969231 |
| A_51_P3728 | 1338.7   | Detected   | 1420     | Detected   | 1156.9   | Detected   | 1203.6   | Detected   | Zfp433        | 0.899081198 | 0.86419661 | 0.84760563 | 0.8147183 |
| A_55_P2134 | 20009.9  | Detected   | 22043.1  | Detected   | 20879.5  | Detected   | 17989.6  | Detected   | Oxa1l         | 0.899034978 | 1.04345849 | 0.81611026 | 0.9472125 |
| A_55_P2132 | 1091.2   | Detected   | 1176.5   | Detected   | 990.3    | Detected   | 981      | Detected   | Ascc2         | 0.899010264 | 0.90753299 | 0.83382915 | 0.841734  |
| A_55_P2167 | 9.9      | Not Detect | 19.4     | Detected   | 21.4     | Detected   | 8.9      | Not Detect | 4930431F10Rik | 0.898989899 | 2.16161616 | 0.45876289 | 1.1030928 |
| A_51_P4759 | 6294.7   | Detected   | 3186.2   | Detected   | 4250.1   | Detected   | 5658.8   | Detected   | Thra          | 0.898978506 | 0.67518706 | 1.77603415 | 1.3339087 |
| A_55_P2132 | 1532.9   | Detected   | 919.7    | Detected   | 1089.8   | Detected   | 1377.7   | Detected   | Gprasp1       | 0.898753996 | 0.71094005 | 1.49798847 | 1.1849516 |
| A_55_P2014 | 1223.9   | Detected   | 970.8    | Detected   | 980.2    | Detected   | 1099.9   | Detected   | Zfp341        | 0.898684533 | 0.80088243 | 1.13298311 | 1.0096827 |
| A_51_P1545 | 87.8     | Detected   | 62.5     | Detected   | 71       | Detected   | 78.9     | Detected   | Vmn1r195      | 0.898633257 | 0.80865604 | 1.2624     | 1.136     |
| A_52_P3668 | 440.8    | Detected   | 415      | Detected   | 500.7    | Detected   | 396.1    | Detected   | Pggt1b        | 0.898593466 | 1.13588929 | 0.95445783 | 1.206506  |
| A_55_P2052 | 55.2     | Detected   | 55.2     | Detected   | 50.5     | Detected   | 49.6     | Detected   | A730098P11Rik | 0.898550725 | 0.91485507 | 0.89855072 | 0.9148551 |
| A_55_P1960 | 91.6     | Detected   | 87       | Detected   | 187.3    | Detected   | 82.3     | Detected   | Hvcn1         | 0.898471616 | 2.04475983 | 0.94597701 | 2.1528736 |
| A_66_P1092 | 450.1    | Detected   | 423.8    | Detected   | 442.4    | Detected   | 404.4    | Detected   | Mettl20       | 0.898467007 | 0.98289269 | 0.95422369 | 1.0438886 |
| A_55_P2038 | 151047.3 | Detected   | 135008.6 | Detected   | 156629.9 | Detected   | 135700.5 | Detected   | Rpl31         | 0.898397389 | 1.03695928 | 1.00512486 | 1.1601476 |
| A_51_P2194 | 42883.4  | Detected   | 46219.7  | Detected   | 40257    | Detected   | 38521.3  | Detected   | Tmem11        | 0.898279987 | 0.93875486 | 0.83343899 | 0.8709922 |
| A_51_P1307 | 12807.2  | Detected   | 7225.3   | Detected   | 10263.5  | Detected   | 11504.4  | Detected   | Acer3         | 0.89827597  | 0.80138516 | 1.59223838 | 1.4204947 |
| A_51_P4184 | 13789.7  | Detected   | 11318.4  | Detected   | 10372.8  | Detected   | 12386.9  | Detected   | Ddx3x         | 0.898271899 | 0.75221361 | 1.0944038  | 0.9164546 |

|            |          |          |         |            |          |            |         |            |               |             |            |            |           |
|------------|----------|----------|---------|------------|----------|------------|---------|------------|---------------|-------------|------------|------------|-----------|
| A_51_P2708 | 1419.4   | Detected | 1305.2  | Detected   | 873.7    | Detected   | 1275    | Detected   | Zfp61         | 0.898266873 | 0.61554178 | 0.97686178 | 0.6693993 |
| A_55_P1988 | 3079.8   | Detected | 2138.1  | Detected   | 3502.6   | Detected   | 2766.4  | Detected   | Fbxl19        | 0.898240145 | 1.13728164 | 1.29385903 | 1.6381834 |
| A_55_P1990 | 1294.1   | Detected | 1006.8  | Detected   | 963.5    | Detected   | 1162.4  | Detected   | Add1          | 0.89823043  | 0.74453288 | 1.15454907 | 0.9569925 |
| A_52_P1687 | 537.3    | Detected | 472.1   | Detected   | 584.4    | Detected   | 482.6   | Detected   | Tmcc3         | 0.898194677 | 1.08766052 | 1.02224105 | 1.2378733 |
| A_55_P2105 | 3068.9   | Detected | 2476.3  | Detected   | 3226.9   | Detected   | 2756.2  | Detected   | Chchd5        | 0.898106814 | 1.05148425 | 1.11303154 | 1.3031135 |
| A_52_P6451 | 3092.3   | Detected | 2935.8  | Detected   | 3177.2   | Detected   | 2777.1  | Detected   | Cpsf6         | 0.898069398 | 1.02745529 | 0.94594318 | 1.0822263 |
| A_51_P3526 | 4035.1   | Detected | 3441.2  | Detected   | 3595.6   | Detected   | 3623.7  | Detected   | Rnf216        | 0.898044658 | 0.89108077 | 1.05303383 | 1.0448681 |
| A_55_P2002 | 40.2     | Detected | 38.9    | Detected   | 25.8     | Detected   | 36.1    | Not Detect | Usp17ld       | 0.89800995  | 0.64179104 | 0.92802057 | 0.6632391 |
| A_52_P6304 | 2046.2   | Detected | 1871.5  | Detected   | 1826.6   | Detected   | 1837.5  | Detected   | Dnajb6        | 0.89800606  | 0.89267911 | 0.98183275 | 0.9760085 |
| A_52_P4725 | 24.5     | Detected | 10      | Not Detect | 20.2     | Detected   | 22      | Not Detect | Sacs          | 0.897959184 | 0.8244898  | 2.2        | 2.02      |
| A_55_P2026 | 780.8    | Detected | 295.6   | Detected   | 808      | Detected   | 701     | Detected   | Uba7          | 0.897797131 | 1.03483607 | 2.3714479  | 2.7334235 |
| A_51_P2515 | 2317.8   | Detected | 2346.3  | Detected   | 2040.9   | Detected   | 2080.8  | Detected   | Psmd9         | 0.897747864 | 0.88053326 | 0.88684311 | 0.8698376 |
| A_52_P3355 | 3644.7   | Detected | 3377.9  | Detected   | 3729.5   | Detected   | 3272    | Detected   | Tiprl         | 0.897741927 | 1.02326666 | 0.96864916 | 1.1040883 |
| A_51_P2777 | 3559.1   | Detected | 2676.9  | Detected   | 3128.1   | Detected   | 3195.1  | Detected   | Cenpc1        | 0.897726953 | 0.87890197 | 1.19358213 | 1.1685532 |
| A_52_P2351 | 599.3    | Detected | 376.3   | Detected   | 409.2    | Detected   | 538     | Detected   | Gm5595        | 0.897714    | 0.6827966  | 1.42971034 | 1.0874302 |
| A_55_P2136 | 1041.1   | Detected | 818.3   | Detected   | 742.4    | Detected   | 934.6   | Detected   | Meis3         | 0.897704351 | 0.71309192 | 1.14212392 | 0.9072467 |
| A_55_P2166 | 391.9    | Detected | 416.1   | Detected   | 299.6    | Detected   | 351.8   | Detected   | 1200014J11Rik | 0.897677979 | 0.76448073 | 0.84546984 | 0.7200192 |
| A_55_P2059 | 706.5    | Detected | 607.3   | Detected   | 700.9    | Detected   | 634.2   | Detected   | Zfp111        | 0.897664544 | 0.9920736  | 1.04429442 | 1.1541248 |
| A_55_P2088 | 26439.5  | Detected | 21421   | Detected   | 25464.2  | Detected   | 23733.4 | Detected   | Uqcrb         | 0.89764935  | 0.96311201 | 1.10795014 | 1.1887494 |
| A_55_P2170 | 30796.1  | Detected | 29002   | Detected   | 31527.8  | Detected   | 27643.4 | Detected   | Eif2b4        | 0.897626648 | 1.0237595  | 0.95315495 | 1.0870905 |
| A_65_P1150 | 207      | Detected | 167     | Detected   | 193.9    | Detected   | 185.8   | Detected   | Zfp85         | 0.897584541 | 0.93671498 | 1.11257485 | 1.1610778 |
| A_55_P2152 | 44.9     | Detected | 117     | Detected   | 13.3     | Not Detect | 40.3    | Not Detect | Mitf          | 0.897550111 | 0.29621381 | 0.34444444 | 0.1136752 |
| A_55_P2041 | 209.7    | Detected | 173.4   | Detected   | 193.4    | Detected   | 188.2   | Detected   | F420015M19Rik | 0.89747258  | 0.92226991 | 1.08535179 | 1.1153403 |
| A_52_P5131 | 916.3    | Detected | 999.4   | Detected   | 1072.6   | Detected   | 822.3   | Detected   | Dna2          | 0.897413511 | 1.17057732 | 0.82279368 | 1.0732439 |
| A_52_P4219 | 76       | Detected | 54.4    | Detected   | 44.5     | Detected   | 68.2    | Detected   | Svil          | 0.897368421 | 0.58552632 | 1.25367647 | 0.8180147 |
| A_55_P2398 | 76       | Detected | 62.2    | Detected   | 66.8     | Detected   | 68.2    | Detected   | 5033423O07Rik | 0.897368421 | 0.87894737 | 1.09646302 | 1.073955  |
| A_55_P2019 | 110851.3 | Detected | 85412.8 | Detected   | 100230.4 | Detected   | 99470.6 | Detected   | Mtch1         | 0.897333635 | 0.90418786 | 1.16458657 | 1.1734822 |
| A_51_P3060 | 4315     | Detected | 4039.8  | Detected   | 3630.1   | Detected   | 3871.7  | Detected   | Lpp           | 0.897265353 | 0.84127462 | 0.95838903 | 0.8985841 |
| A_51_P2477 | 7965.5   | Detected | 5761.1  | Detected   | 6280.8   | Detected   | 7147.1  | Detected   | Casp8         | 0.89725692  | 0.78850041 | 1.24057906 | 1.0902085 |
| A_55_P2161 | 526.5    | Detected | 449.6   | Detected   | 448.4    | Detected   | 472.4   | Detected   | Rabgap1       | 0.897245964 | 0.85166192 | 1.05071174 | 0.997331  |
| A_55_P2087 | 172.1    | Detected | 157.8   | Detected   | 122.1    | Detected   | 154.4   | Detected   | Vmn2r3        | 0.897152818 | 0.70947124 | 0.97845374 | 0.7737643 |
| A_52_P1055 | 2167.4   | Detected | 2317.3  | Detected   | 2497     | Detected   | 1944.3  | Detected   | Bnip1         | 0.897065609 | 1.15207161 | 0.83903681 | 1.0775471 |
| A_52_P6413 | 3248.3   | Detected | 2969.2  | Detected   | 2856.9   | Detected   | 2913.6  | Detected   | Desi1         | 0.896961488 | 0.8795062  | 0.98127442 | 0.9621784 |
| A_55_P2420 | 143.6    | Detected | 96.1    | Detected   | 79.3     | Detected   | 128.8   | Detected   | 6330575P09Rik | 0.896935933 | 0.55222841 | 1.34027055 | 0.8251821 |
| A_55_P2014 | 4360.7   | Detected | 3483.7  | Detected   | 3528.6   | Detected   | 3911.1  | Detected   | Pdpk1         | 0.896897287 | 0.80918201 | 1.12268565 | 1.0128886 |
| A_51_P3451 | 8984.4   | Detected | 7728.5  | Detected   | 8253.8   | Detected   | 8057.2  | Detected   | Thap4         | 0.896798896 | 0.91868127 | 1.04253089 | 1.0679692 |
| A_55_P2027 | 17618    | Detected | 16567.9 | Detected   | 17692.5  | Detected   | 15795.2 | Detected   | Nsa2          | 0.896537632 | 1.00422863 | 0.95336162 | 1.0678782 |
| A_66_P1145 | 23333    | Detected | 24055.9 | Detected   | 24543.9  | Detected   | 20918   | Detected   | Zcrb1         | 0.896498521 | 1.05189646 | 0.86955799 | 1.0202861 |
| A_66_P1033 | 59.9     | Detected | 53      | Detected   | 55.6     | Detected   | 53.7    | Detected   | Ogfrl1        | 0.896494157 | 0.92821369 | 1.01320755 | 1.0490566 |
| A_55_P2007 | 595.1    | Detected | 466.7   | Detected   | 373.3    | Detected   | 533.5   | Detected   | Mir22hg       | 0.896487985 | 0.62728953 | 1.14313263 | 0.7998714 |



|            |         |          |         |            |         |            |         |            |               |             |            |            |           |
|------------|---------|----------|---------|------------|---------|------------|---------|------------|---------------|-------------|------------|------------|-----------|
| A_52_P6522 | 18327.2 | Detected | 14916.2 | Detected   | 19169.6 | Detected   | 16430   | Detected   | Psmid14       | 0.896481732 | 1.04596447 | 1.10148697 | 1.2851531 |
| A_55_P2009 | 43473.9 | Detected | 35883.8 | Detected   | 54094.2 | Detected   | 38972.9 | Detected   | Rnu12         | 0.896466616 | 1.2442914  | 1.0860862  | 1.5074825 |
| A_55_P2358 | 705.5   | Detected | 560.3   | Detected   | 795.1   | Detected   | 632.4   | Detected   | 5-Mar         | 0.896385542 | 1.12700213 | 1.12868106 | 1.4190612 |
| A_52_P1906 | 2357.5  | Detected | 1125.1  | Detected   | 1700.1  | Detected   | 2113.2  | Detected   | Mxd3          | 0.896373277 | 0.72114528 | 1.87823305 | 1.5110657 |
| A_52_P1062 | 5768.7  | Detected | 5063.1  | Detected   | 3426.2  | Detected   | 5170.7  | Detected   | Egfr          | 0.89633713  | 0.59392931 | 1.0212518  | 0.6767    |
| A_66_P1043 | 4134.6  | Detected | 3589.1  | Detected   | 4674.4  | Detected   | 3705.9  | Detected   | Ccdc167       | 0.896314033 | 1.13055676 | 1.03254298 | 1.3023878 |
| A_55_P2033 | 1235.9  | Detected | 1460.2  | Detected   | 1314.7  | Detected   | 1107.7  | Detected   | Zzz3          | 0.896269925 | 1.0637592  | 0.75859471 | 0.9003561 |
| A_55_P2043 | 48.2    | Detected | 37.9    | Detected   | 39.1    | Detected   | 43.2    | Not Detect | Tmem8b        | 0.89626556  | 0.81120332 | 1.13984169 | 1.0316623 |
| A_51_P3490 | 13988.4 | Detected | 10662   | Detected   | 16712.7 | Detected   | 12537.2 | Detected   | Ptges2        | 0.896256899 | 1.19475422 | 1.17587695 | 1.5675014 |
| A_55_P2133 | 2350.6  | Detected | 1698.7  | Detected   | 1865.3  | Detected   | 2106.7  | Detected   | Gm10792       | 0.896239258 | 0.79354207 | 1.24018367 | 1.098075  |
| A_55_P1972 | 27863.8 | Detected | 30394.2 | Detected   | 20702.1 | Detected   | 24971.8 | Detected   | Pmm1          | 0.896209419 | 0.74297476 | 0.82159754 | 0.6811201 |
| A_55_P2181 | 66.4    | Detected | 34.9    | Detected   | 42.9    | Detected   | 59.5    | Detected   | Gm44          | 0.896084337 | 0.64608434 | 1.70487106 | 1.2292264 |
| A_55_P1980 | 335.6   | Detected | 309.2   | Detected   | 396.8   | Detected   | 300.7   | Detected   | Osbp          | 0.896007151 | 1.18235995 | 0.9725097  | 1.2833118 |
| A_55_P2078 | 159.6   | Detected | 182.5   | Detected   | 143.4   | Detected   | 143     | Detected   | Rps6kc1       | 0.895989975 | 0.89849624 | 0.78356164 | 0.7857534 |
| A_55_P2165 | 319     | Detected | 380.5   | Detected   | 322.9   | Detected   | 285.8   | Detected   | Cenpo         | 0.895924765 | 1.01222571 | 0.75111695 | 0.8486202 |
| A_51_P4496 | 24      | Detected | 37.4    | Detected   | 21.1    | Detected   | 21.5    | Not Detect | Pldi          | 0.895833333 | 0.87916667 | 0.57486631 | 0.5641711 |
| A_52_P6297 | 56.6    | Detected | 67.4    | Detected   | 61.7    | Detected   | 50.7    | Detected   | Zranb3        | 0.895759717 | 1.09010601 | 0.75222552 | 0.9154303 |
| A_52_P1534 | 16.3    | Detected | 14.2    | Not Detect | 13.6    | Not Detect | 14.6    | Not Detect | Nsun6         | 0.895705521 | 0.83435583 | 1.02816901 | 0.9577465 |
| A_55_P2009 | 5128.6  | Detected | 3998    | Detected   | 3123.7  | Detected   | 4593.7  | Detected   | Spn           | 0.895702531 | 0.6090746  | 1.1489995  | 0.7813157 |
| A_51_P3073 | 5827    | Detected | 5639.5  | Detected   | 5074.8  | Detected   | 5218.8  | Detected   | Syde1         | 0.89562382  | 0.87091128 | 0.92540119 | 0.899867  |
| A_55_P2073 | 3548.6  | Detected | 2960.1  | Detected   | 4145.7  | Detected   | 3178    | Detected   | Chchd5        | 0.895564448 | 1.16826354 | 1.07361238 | 1.400527  |
| A_51_P2815 | 1313.5  | Detected | 1203.8  | Detected   | 1199.4  | Detected   | 1176.3  | Detected   | Lrrc42        | 0.89554625  | 0.91313285 | 0.97715567 | 0.9963449 |
| A_51_P2100 | 5794    | Detected | 4968.2  | Detected   | 6013.9  | Detected   | 5188.5  | Detected   | Ercc4         | 0.89549534  | 1.03795305 | 1.04434202 | 1.2104786 |
| A_55_P2053 | 9686.5  | Detected | 7557.5  | Detected   | 9367.3  | Detected   | 8674    | Detected   | Rabep2        | 0.895473081 | 0.96704692 | 1.14773404 | 1.2394707 |
| A_52_P1944 | 265.6   | Detected | 189.4   | Detected   | 162.9   | Detected   | 237.8   | Detected   | Ercc6l2       | 0.895331325 | 0.61332831 | 1.25554382 | 0.8600845 |
| A_55_P2122 | 86.9    | Detected | 61.8    | Detected   | 52.6    | Detected   | 77.8    | Detected   | Olfir907      | 0.895281933 | 0.60529344 | 1.25889968 | 0.8511327 |
| A_55_P1957 | 10263.1 | Detected | 13339.9 | Detected   | 10420.9 | Detected   | 9188    | Detected   | Tsr1          | 0.895246076 | 1.01537547 | 0.68876079 | 0.7811828 |
| A_66_P1348 | 31.5    | Detected | 14.2    | Not Detect | 41.7    | Detected   | 28.2    | Not Detect | Nos1ap        | 0.895238095 | 1.32380952 | 1.98591549 | 2.9366197 |
| A_52_P1334 | 6623.2  | Detected | 5808.7  | Detected   | 4803.8  | Detected   | 5929    | Detected   | Plekhm1       | 0.895186617 | 0.72529895 | 1.02071031 | 0.8270009 |
| A_55_P1970 | 2756    | Detected | 2280    | Detected   | 2088.8  | Detected   | 2467    | Detected   | Rnf11         | 0.895137881 | 0.75791001 | 1.08201754 | 0.9161404 |
| A_55_P2063 | 5187.1  | Detected | 3822.8  | Detected   | 4143.5  | Detected   | 4642.8  | Detected   | Gpatch8       | 0.895066608 | 0.79880858 | 1.21450246 | 1.0838914 |
| A_55_P2305 | 16.2    | Detected | 18.4    | Detected   | 6.9     | Not Detect | 14.5    | Not Detect | 6720427H10Rik | 0.895061728 | 0.42592593 | 0.78804348 | 0.375     |
| A_55_P1986 | 20      | Detected | 15      | Not Detect | 25.7    | Detected   | 17.9    | Not Detect | Tcrb-J        | 0.895       | 1.285      | 1.19333333 | 1.7133333 |
| A_65_P0823 | 239     | Detected | 314.6   | Detected   | 249     | Detected   | 213.9   | Detected   | Mef2a         | 0.894979079 | 1.041841   | 0.679911   | 0.7914812 |
| A_51_P4811 | 130.4   | Detected | 129.6   | Detected   | 173     | Detected   | 116.7   | Detected   | Hdac8         | 0.89493865  | 1.32668712 | 0.90046296 | 1.3348765 |
| A_51_P5211 | 583.4   | Detected | 411.7   | Detected   | 649.5   | Detected   | 522.1   | Detected   | Hif1an        | 0.894926294 | 1.11330134 | 1.26815642 | 1.5776051 |
| A_55_P2003 | 386.3   | Detected | 363.6   | Detected   | 350.6   | Detected   | 345.7   | Detected   | Anp32b        | 0.894900337 | 0.90758478 | 0.95077008 | 0.9642464 |
| A_52_P3650 | 1756.1  | Detected | 1209.4  | Detected   | 1721.5  | Detected   | 1571.3  | Detected   | Zbtb22        | 0.894766813 | 0.98029725 | 1.29923929 | 1.4234331 |
| A_55_P2165 | 1583.3  | Detected | 1454.3  | Detected   | 1399.8  | Detected   | 1416.6  | Detected   | Aebp2         | 0.894713573 | 0.88410282 | 0.97407688 | 0.9625249 |
| A_55_P1966 | 18922.4 | Detected | 18469.1 | Detected   | 17292.7 | Detected   | 16929.7 | Detected   | Mad2l2        | 0.894690948 | 0.91387456 | 0.91664997 | 0.9363044 |

|            |          |            |          |            |          |            |          |            |               |             |            |            |           |
|------------|----------|------------|----------|------------|----------|------------|----------|------------|---------------|-------------|------------|------------|-----------|
| A_55_P2076 | 5746.6   | Detected   | 3419.8   | Detected   | 3421.9   | Detected   | 5141.3   | Detected   | Znfx1         | 0.894668152 | 0.59546514 | 1.50339201 | 1.0006141 |
| A_51_P4680 | 4797.2   | Detected   | 3841.9   | Detected   | 5800.9   | Detected   | 4291.3   | Detected   | Smyd1         | 0.89454265  | 1.20922622 | 1.11697337 | 1.509904  |
| A_55_P2049 | 59050.4  | Detected   | 54953.9  | Detected   | 58395.9  | Detected   | 52820.8  | Detected   | LOC101055805  | 0.894503678 | 0.98891625 | 0.96118383 | 1.0626343 |
| A_55_P2081 | 12067.5  | Detected   | 13949.5  | Detected   | 12458.5  | Detected   | 10793.5  | Detected   | Timeless      | 0.89442718  | 1.03240108 | 0.77375533 | 0.8931144 |
| A_51_P3156 | 11944.8  | Detected   | 8093.2   | Detected   | 12738.3  | Detected   | 10683.2  | Detected   | Nfs1          | 0.894380818 | 1.06643058 | 1.32002175 | 1.573951  |
| A_51_P5171 | 9429.9   | Detected   | 8655     | Detected   | 7832.7   | Detected   | 8433.3   | Detected   | Zfp930        | 0.894314892 | 0.83062387 | 0.97438475 | 0.9049913 |
| A_55_P2007 | 12.3     | Not Detect | 22.7     | Detected   | 3.8      | Not Detect | 11       | Not Detect | 4933402N22Rik | 0.894308943 | 0.30894309 | 0.4845815  | 0.1674009 |
| A_55_P1996 | 3312.8   | Detected   | 3951.5   | Detected   | 3950.9   | Detected   | 2962.6   | Detected   | Dnajb12       | 0.894288819 | 1.19261652 | 0.7497406  | 0.9998482 |
| A_55_P1969 | 140563.9 | Detected   | 80215.3  | Detected   | 131951.3 | Detected   | 125704.6 | Detected   | Ap2m1         | 0.894287936 | 0.93872822 | 1.56709007 | 1.6449642 |
| A_55_P2010 | 116.3    | Detected   | 107.7    | Detected   | 100.8    | Detected   | 104      | Detected   | Serpina10     | 0.894239037 | 0.86672399 | 0.96564531 | 0.9359331 |
| A_51_P3873 | 2456.9   | Detected   | 2083.1   | Detected   | 2264.4   | Detected   | 2196.9   | Detected   | Zmym2         | 0.894175587 | 0.92164923 | 1.05463012 | 1.0870337 |
| A_51_P4988 | 52696.5  | Detected   | 45956    | Detected   | 53127.8  | Detected   | 47119.1  | Detected   | Derl2         | 0.894159954 | 1.0081846  | 1.02530899 | 1.156058  |
| A_51_P1408 | 8944.2   | Detected   | 9978.3   | Detected   | 10836.2  | Detected   | 7996.4   | Detected   | Wdr36         | 0.894031887 | 1.21153373 | 0.80137899 | 1.0859766 |
| A_51_P3604 | 109953.5 | Detected   | 95346.1  | Detected   | 106191   | Detected   | 98300.9  | Detected   | Mcm6          | 0.894022473 | 0.96578099 | 1.03099026 | 1.1137425 |
| A_55_P2079 | 31346.2  | Detected   | 16421.9  | Detected   | 25901.7  | Detected   | 28023.5  | Detected   | Ap2m1         | 0.893999911 | 0.82631069 | 1.70647124 | 1.5772657 |
| A_55_P2126 | 3019.2   | Detected   | 3073.6   | Detected   | 2753.9   | Detected   | 2699.1   | Detected   | Atad5         | 0.893978537 | 0.91212904 | 0.87815591 | 0.8959852 |
| A_55_P2154 | 75166    | Detected   | 68722.9  | Detected   | 68141.5  | Detected   | 67190.4  | Detected   | Sumo2         | 0.893893516 | 0.90654684 | 0.9777003  | 0.9915399 |
| A_52_P4501 | 3827.9   | Detected   | 2391.7   | Detected   | 3189.1   | Detected   | 3421.5   | Detected   | Mtmr4         | 0.893832127 | 0.83311999 | 1.4305724  | 1.333403  |
| A_55_P2255 | 63.1     | Detected   | 56.6     | Detected   | 41.5     | Detected   | 56.4     | Detected   | 9130002K18Rik | 0.893819334 | 0.65768621 | 0.99646643 | 0.7332155 |
| A_52_P5402 | 142952.2 | Detected   | 98151.1  | Detected   | 86193.2  | Detected   | 127767.5 | Detected   | Timp2         | 0.89377778  | 0.6029512  | 1.30174292 | 0.8781685 |
| A_51_P3491 | 20656    | Detected   | 18431.9  | Detected   | 22179.9  | Detected   | 18460.8  | Detected   | 2210013O21Rik | 0.893725794 | 1.07377517 | 1.00156793 | 1.2033431 |
| A_55_P2011 | 296.3    | Detected   | 278.4    | Detected   | 233.2    | Detected   | 264.8    | Detected   | Acvr1l        | 0.893688829 | 0.78704016 | 0.95114943 | 0.8376437 |
| A_55_P2012 | 14237.5  | Detected   | 8083.6   | Detected   | 8958.2   | Detected   | 12722.6  | Detected   | Sfxn3         | 0.893597893 | 0.62919754 | 1.57387798 | 1.1081944 |
| A_51_P1403 | 4379.3   | Detected   | 2093.1   | Detected   | 3823.9   | Detected   | 3913.2   | Detected   | Mocos         | 0.893567465 | 0.87317608 | 1.86957145 | 1.8269075 |
| A_51_P2916 | 4211.2   | Detected   | 4252.5   | Detected   | 4439.5   | Detected   | 3762.9   | Detected   | Tmed4         | 0.893545783 | 1.05421258 | 0.88486772 | 1.0439741 |
| A_55_P2083 | 1545.2   | Detected   | 1697.2   | Detected   | 1431.8   | Detected   | 1380.7   | Detected   | Trmt5         | 0.893541289 | 0.92661144 | 0.81351638 | 0.8436248 |
| A_55_P2000 | 16558.9  | Detected   | 9679.9   | Detected   | 18005.1  | Detected   | 14795.3  | Detected   | Eci2          | 0.893495341 | 1.08733672 | 1.52845587 | 1.8600502 |
| A_55_P1985 | 166.1    | Detected   | 131.7    | Detected   | 280.6    | Detected   | 148.4    | Detected   | Dnase1        | 0.893437688 | 1.68934377 | 1.12680334 | 2.1305998 |
| A_66_P1326 | 58777.2  | Detected   | 47559    | Detected   | 54686.3  | Detected   | 52513.7  | Detected   | Uqcrb         | 0.893436571 | 0.93039988 | 1.10418007 | 1.1498623 |
| A_55_P2061 | 4817.6   | Detected   | 4604.5   | Detected   | 4352.3   | Detected   | 4303.9   | Detected   | Smg6          | 0.893370143 | 0.90341664 | 0.93471604 | 0.9452275 |
| A_55_P2011 | 82.5     | Detected   | 78       | Detected   | 87       | Detected   | 73.7     | Detected   | Oscp1         | 0.893333333 | 1.05454545 | 0.94487179 | 1.1153846 |
| A_55_P2054 | 855.8    | Detected   | 665.8    | Detected   | 1026.6   | Detected   | 764.5    | Detected   | Mzt2          | 0.893316195 | 1.19957934 | 1.14824272 | 1.5419045 |
| A_55_P1952 | 6248.5   | Detected   | 4890.1   | Detected   | 6137     | Detected   | 5581.5   | Detected   | Ccnb1         | 0.893254381 | 0.98215572 | 1.1413877  | 1.2549846 |
| A_55_P2185 | 854.1    | Detected   | 607.5    | Detected   | 783.1    | Detected   | 762.9    | Detected   | Mbtps2        | 0.893220934 | 0.91687156 | 1.25580247 | 1.2890535 |
| A_51_P4360 | 203.2    | Detected   | 157      | Detected   | 125.7    | Detected   | 181.5    | Detected   | Hivep1        | 0.893208661 | 0.61860236 | 1.15605096 | 0.8006369 |
| A_51_P3625 | 20.6     | Detected   | 17.2     | Not Detect | 16.6     | Not Detect | 18.4     | Not Detect | Olf1r1307     | 0.893203883 | 0.80582524 | 1.06976744 | 0.9651163 |
| A_55_P2075 | 380062   | Detected   | 344779.2 | Detected   | 405192   | Detected   | 339465.1 | Detected   | Rpl37a        | 0.893183481 | 1.06612079 | 0.98458695 | 1.1752217 |
| A_55_P2278 | 33.7     | Detected   | 32.5     | Detected   | 45.9     | Detected   | 30.1     | Not Detect | 3830408C21Rik | 0.893175074 | 1.3620178  | 0.92615385 | 1.4123077 |
| A_55_P2010 | 17819.3  | Detected   | 9342.7   | Detected   | 18938.4  | Detected   | 15914.7  | Detected   | Rab27b        | 0.893115891 | 1.06280269 | 1.70343691 | 2.02708   |
| A_55_P2063 | 3300.2   | Detected   | 3197.3   | Detected   | 2618     | Detected   | 2947.2   | Detected   | Txnrd3        | 0.893036786 | 0.79328526 | 0.92177775 | 0.8188159 |

|            |          |          |          |          |          |          |          |            |               |             |            |            |           |
|------------|----------|----------|----------|----------|----------|----------|----------|------------|---------------|-------------|------------|------------|-----------|
| A_52_P5027 | 2201.4   | Detected | 1831.5   | Detected | 1437.2   | Detected | 1965.9   | Detected   | Rad54b        | 0.893022622 | 0.65285727 | 1.07338247 | 0.784712  |
| A_51_P4427 | 1550.7   | Detected | 1011.1   | Detected | 1582.1   | Detected | 1384.8   | Detected   | Usp6nl        | 0.893016057 | 1.02024892 | 1.36959747 | 1.5647315 |
| A_52_P1422 | 8569.7   | Detected | 7700.8   | Detected | 6552.8   | Detected | 7652.7   | Detected   | Akirin1       | 0.892995087 | 0.76464754 | 0.9937539  | 0.8509246 |
| A_66_P1072 | 3948.7   | Detected | 6642.5   | Detected | 3587.7   | Detected | 3526.1   | Detected   | Loxl4         | 0.892977436 | 0.90857751 | 0.53083929 | 0.5401129 |
| A_52_P4641 | 5482.8   | Detected | 5040.4   | Detected | 3985     | Detected | 4895.5   | Detected   | Grk6          | 0.892883198 | 0.72681841 | 0.97125228 | 0.7906119 |
| A_51_P2296 | 5687.3   | Detected | 4403.3   | Detected | 2659     | Detected | 5077.5   | Detected   | Plxna2        | 0.892778647 | 0.46753292 | 1.15311244 | 0.6038653 |
| A_51_P2126 | 15973.4  | Detected | 15754.6  | Detected | 16607    | Detected | 14260.3  | Detected   | Chd8          | 0.892752952 | 1.03966594 | 0.90515151 | 1.0541048 |
| A_55_P2367 | 104.4    | Detected | 63.6     | Detected | 87.8     | Detected | 93.2     | Detected   | A630026N12Rik | 0.892720307 | 0.84099617 | 1.46540881 | 1.3805031 |
| A_55_P2145 | 130828.2 | Detected | 108965.4 | Detected | 128465   | Detected | 116789.1 | Detected   | Rpn2          | 0.892690567 | 0.98193662 | 1.07179986 | 1.1789522 |
| A_55_P1997 | 79.2     | Detected | 60.8     | Detected | 56.2     | Detected | 70.7     | Detected   | Kcnn3         | 0.892676768 | 0.70959596 | 1.16282895 | 0.9243421 |
| A_55_P2020 | 55.9     | Detected | 41.5     | Detected | 55       | Detected | 49.9     | Detected   | Frs3          | 0.892665474 | 0.98389982 | 1.20240964 | 1.3253012 |
| A_52_P4760 | 12087.6  | Detected | 3236.2   | Detected | 9560.6   | Detected | 10789.4  | Detected   | 8430427H17Rik | 0.892600682 | 0.79094278 | 3.33397194 | 2.9542674 |
| A_52_P1197 | 5565.6   | Detected | 9955     | Detected | 5456.4   | Detected | 4967.7   | Detected   | Gadd45b       | 0.892572229 | 0.98037947 | 0.49901557 | 0.5481065 |
| A_55_P2120 | 129362.5 | Detected | 83639.9  | Detected | 159329.1 | Detected | 115452.4 | Detected   | Avpi1         | 0.89247193  | 1.23164828 | 1.38035077 | 1.9049413 |
| A_55_P2026 | 113064.5 | Detected | 97553    | Detected | 135706   | Detected | 100899   | Detected   | LOC101055925  | 0.892402124 | 1.20025295 | 1.0342993  | 1.3911002 |
| A_51_P1938 | 1436.3   | Detected | 1046.8   | Detected | 1371     | Detected | 1281.7   | Detected   | Gtf3c4        | 0.89236232  | 0.95453596 | 1.22439817 | 1.3097058 |
| A_55_P2081 | 1267.6   | Detected | 1675.3   | Detected | 1347     | Detected | 1131.1   | Detected   | Timeless      | 0.892316188 | 1.06263806 | 0.67516266 | 0.8040351 |
| A_51_P2143 | 3224.7   | Detected | 2577.3   | Detected | 2936.7   | Detected | 2877.3   | Detected   | Sephs1        | 0.892269048 | 0.91068937 | 1.11640088 | 1.1394483 |
| A_55_P2066 | 169999.8 | Detected | 164950.8 | Detected | 148569.5 | Detected | 151681.1 | Detected   | Sp110         | 0.892242814 | 0.87393926 | 0.91955359 | 0.9006898 |
| A_66_P1322 | 2779.3   | Detected | 2483.5   | Detected | 2750.3   | Detected | 2479.5   | Detected   | Ercc1         | 0.892131112 | 0.98956572 | 0.99838937 | 1.107429  |
| A_55_P2115 | 24.1     | Detected | 20       | Detected | 21.3     | Detected | 21.5     | Not Detect | BC052688      | 0.892116183 | 0.88381743 | 1.075      | 1.065     |
| A_55_P2170 | 8634.2   | Detected | 7496.2   | Detected | 7742.2   | Detected | 7702.7   | Detected   | Yipf4         | 0.892115077 | 0.89668991 | 1.02754729 | 1.0328166 |
| A_55_P2124 | 900.6    | Detected | 715.2    | Detected | 722.4    | Detected | 803.4    | Detected   | Smurf2        | 0.892071952 | 0.80213191 | 1.12332215 | 1.0100671 |
| A_55_P2084 | 6306.9   | Detected | 4331.3   | Detected | 5875.4   | Detected | 5626.2   | Detected   | Agfg1         | 0.892070589 | 0.93158287 | 1.29896336 | 1.356498  |
| A_55_P2160 | 185.3    | Detected | 207.4    | Detected | 233.5    | Detected | 165.3    | Detected   | Slc35e2       | 0.892066919 | 1.26011873 | 0.79701061 | 1.1258438 |
| A_51_P1406 | 8331     | Detected | 9214.2   | Detected | 7815.3   | Detected | 7431.8   | Detected   | Asun          | 0.892065778 | 0.93809867 | 0.80655944 | 0.84818   |
| A_55_P1996 | 3959     | Detected | 2922     | Detected | 2789.9   | Detected | 3531.2   | Detected   | Zfp592        | 0.89194241  | 0.70469816 | 1.20848734 | 0.9547912 |
| A_51_P3979 | 12083.1  | Detected | 8119.6   | Detected | 11389.3  | Detected | 10777    | Detected   | D17Wsu92e     | 0.891906878 | 0.94258096 | 1.32728213 | 1.4026923 |
| A_51_P2064 | 151.6    | Detected | 113.3    | Detected | 103      | Detected | 135.2    | Detected   | Zfp773        | 0.89182058  | 0.67941953 | 1.19329214 | 0.9090909 |
| A_55_P1997 | 2254.3   | Detected | 2097.4   | Detected | 1931.3   | Detected | 2010.2   | Detected   | Gm10778       | 0.89171805  | 0.85671827 | 0.95842472 | 0.9208067 |
| A_55_P2077 | 2046.5   | Detected | 1844.3   | Detected | 1506.2   | Detected | 1824.9   | Detected   | Tpgs2         | 0.891717567 | 0.73598827 | 0.9894811  | 0.8166784 |
| A_55_P2360 | 2846     | Detected | 2450.1   | Detected | 3422.4   | Detected | 2537.7   | Detected   | Cbx5          | 0.891672523 | 1.20252987 | 1.03575364 | 1.3968409 |
| A_51_P3455 | 5966.7   | Detected | 5079.5   | Detected | 5483.1   | Detected | 5319.5   | Detected   | Sptlc1        | 0.891531332 | 0.91895017 | 1.04724874 | 1.0794566 |
| A_52_P5158 | 298.7    | Detected | 256.7    | Detected | 286.9    | Detected | 266.3    | Detected   | Med13         | 0.891529963 | 0.96049548 | 1.03739774 | 1.1176471 |
| A_55_P2113 | 233.2    | Detected | 259.4    | Detected | 139.6    | Detected | 207.9    | Detected   | Fosb          | 0.891509434 | 0.59862779 | 0.80146492 | 0.538165  |
| A_55_P2061 | 21.2     | Detected | 24.6     | Detected | 19.8     | Detected | 18.9     | Not Detect | Olf455        | 0.891509434 | 0.93396226 | 0.76829268 | 0.804878  |
| A_55_P2031 | 133.6    | Detected | 99.1     | Detected | 111.4    | Detected | 119.1    | Detected   | Zfp597        | 0.891467066 | 0.83383234 | 1.20181635 | 1.1241171 |
| A_55_P1953 | 11550.7  | Detected | 11338.7  | Detected | 10069.5  | Detected | 10294.8  | Detected   | Pabpc4        | 0.891270659 | 0.87176535 | 0.90793477 | 0.8880648 |
| A_55_P2030 | 7452     | Detected | 4022.8   | Detected | 11164.5  | Detected | 6641.1   | Detected   | Nedd4l        | 0.891183575 | 1.49818841 | 1.65086507 | 2.7753058 |
| A_55_P2003 | 4162     | Detected | 4532.9   | Detected | 3631.8   | Detected | 3709.1   | Detected   | Gemin8        | 0.891182124 | 0.87260932 | 0.81826204 | 0.8012089 |

|            |          |            |          |            |          |            |          |            |               |             |            |            |           |
|------------|----------|------------|----------|------------|----------|------------|----------|------------|---------------|-------------|------------|------------|-----------|
| A_51_P2147 | 940.8    | Detected   | 903      | Detected   | 302.5    | Detected   | 838.4    | Detected   | Parp12        | 0.891156463 | 0.32153486 | 0.92846069 | 0.3349945 |
| A_51_P4337 | 522.7    | Detected   | 373.5    | Detected   | 384.5    | Detected   | 465.8    | Detected   | Sgtb          | 0.891142147 | 0.7356036  | 1.24712182 | 1.0294511 |
| A_55_P2185 | 122.9    | Detected   | 97.3     | Detected   | 99.9     | Detected   | 109.5    | Detected   | Zfp865        | 0.890968267 | 0.81285598 | 1.12538541 | 1.0267215 |
| A_55_P2041 | 2803.7   | Detected   | 1833.6   | Detected   | 2257.1   | Detected   | 2498     | Detected   | Nde1          | 0.89096551  | 0.80504334 | 1.36234729 | 1.2309664 |
| A_66_P1154 | 216221.5 | Detected   | 233276.6 | Detected   | 212838   | Detected   | 192644.8 | Detected   | Pabpc1        | 0.890960427 | 0.98435169 | 0.82582136 | 0.9123847 |
| A_51_P1855 | 11       | Not Detect | 21.5     | Detected   | 3.6      | Not Detect | 9.8      | Not Detect | Synm          | 0.890909091 | 0.32727273 | 0.45581395 | 0.1674419 |
| A_55_P2221 | 27.5     | Detected   | 20.2     | Detected   | 13.9     | Not Detect | 24.5     | Not Detect | F420014N23Rik | 0.890909091 | 0.50545455 | 1.21287129 | 0.6881188 |
| A_51_P3084 | 1844.8   | Detected   | 1701.3   | Detected   | 1325.8   | Detected   | 1643.4   | Detected   | Rngtt         | 0.890828274 | 0.71866869 | 0.9659672  | 0.7792864 |
| A_51_P3510 | 17.4     | Detected   | 13.6     | Not Detect | 18.7     | Detected   | 15.5     | Not Detect | Lta           | 0.890804598 | 1.07471264 | 1.13970588 | 1.375     |
| A_55_P1963 | 29.3     | Detected   | 24.4     | Detected   | 21.7     | Detected   | 26.1     | Not Detect | Olfr1396      | 0.890784983 | 0.74061433 | 1.06967213 | 0.8893443 |
| A_55_P1983 | 1197.9   | Detected   | 1039.2   | Detected   | 1139.3   | Detected   | 1066.9   | Detected   | Thap4         | 0.890641957 | 0.95108106 | 1.02665512 | 1.0963241 |
| A_55_P2152 | 1274.4   | Detected   | 1309.5   | Detected   | 1290.7   | Detected   | 1134.9   | Detected   | Xrcc3         | 0.890536723 | 1.01279033 | 0.86666667 | 0.9856434 |
| A_55_P2169 | 14.6     | Detected   | 14.6     | Not Detect | 8.5      | Not Detect | 13       | Not Detect | 4930583109Rik | 0.890410959 | 0.58219178 | 0.89041096 | 0.5821918 |
| A_55_P2014 | 10216.8  | Detected   | 7998.9   | Detected   | 8620.1   | Detected   | 9096.8   | Detected   | Pdpk1         | 0.890376635 | 0.84371819 | 1.13725637 | 1.0776607 |
| A_55_P2060 | 1839.9   | Detected   | 766.8    | Detected   | 1027.1   | Detected   | 1638.2   | Detected   | Ulk2          | 0.890374477 | 0.55823686 | 2.13641106 | 1.3394627 |
| A_55_P2207 | 288.1    | Detected   | 218.3    | Detected   | 238      | Detected   | 256.5    | Detected   | 8430437003Rik | 0.890315863 | 0.82610205 | 1.17498855 | 1.0902428 |
| A_55_P2084 | 3712.2   | Detected   | 3362.9   | Detected   | 4704.2   | Detected   | 3304.7   | Detected   | 2310009B15Rik | 0.89022682  | 1.26722698 | 0.98269351 | 1.3988522 |
| A_55_P2079 | 1005.9   | Detected   | 1068     | Detected   | 1254.9   | Detected   | 895.4    | Detected   | Myo1h         | 0.890148126 | 1.24753952 | 0.83838951 | 1.175     |
| A_55_P2115 | 1736.8   | Detected   | 1136.7   | Detected   | 1537     | Detected   | 1545.6   | Detected   | Fert2         | 0.889912483 | 0.88496085 | 1.35972552 | 1.3521598 |
| A_51_P5144 | 1106.1   | Detected   | 636.9    | Detected   | 991.6    | Detected   | 984.3    | Detected   | Gsk3b         | 0.889883374 | 0.89648314 | 1.54545455 | 1.5569163 |
| A_55_P2079 | 92.6     | Detected   | 52       | Detected   | 47.6     | Detected   | 82.4     | Detected   | Mpp1          | 0.889848812 | 0.51403888 | 1.58461538 | 0.9153846 |
| A_55_P2101 | 1328.1   | Detected   | 1256.8   | Detected   | 1268.8   | Detected   | 1181.7   | Detected   | Tmem237       | 0.889767337 | 0.95534975 | 0.94024507 | 1.0095481 |
| A_55_P2078 | 7889.9   | Detected   | 6525.5   | Detected   | 7295     | Detected   | 7020     | Detected   | Pqlc2         | 0.889745117 | 0.9245998  | 1.07577963 | 1.117922  |
| A_51_P3846 | 50970.8  | Detected   | 41952.7  | Detected   | 41510.6  | Detected   | 45350.9  | Detected   | Ctsd          | 0.889742755 | 0.81439962 | 1.08100075 | 0.9894619 |
| A_66_P1014 | 6848.5   | Detected   | 6978.9   | Detected   | 4736.1   | Detected   | 6093.4   | Detected   | Ogfod3        | 0.889742279 | 0.69155289 | 0.87311754 | 0.6786313 |
| A_55_P2037 | 4048.5   | Detected   | 4502.3   | Detected   | 3333.4   | Detected   | 3601.8   | Detected   | Kifap3        | 0.889662838 | 0.82336668 | 0.79999112 | 0.7403771 |
| A_55_P2075 | 31629.9  | Detected   | 31717.2  | Detected   | 30432.8  | Detected   | 28138.4  | Detected   | Gm8994        | 0.889613941 | 0.9621529  | 0.88716532 | 0.9595046 |
| A_55_P2115 | 4719.8   | Detected   | 3008.3   | Detected   | 4032.5   | Detected   | 4198.4   | Detected   | Fert2         | 0.889529217 | 0.85437942 | 1.39560549 | 1.3404581 |
| A_55_P1984 | 2202.2   | Detected   | 1728.5   | Detected   | 1838.1   | Detected   | 1958.8   | Detected   | Emd           | 0.889474162 | 0.83466533 | 1.13323691 | 1.0634076 |
| A_55_P2184 | 466.8    | Detected   | 441.7    | Detected   | 319.9    | Detected   | 415.2    | Detected   | Yy2           | 0.889460154 | 0.6853042  | 0.94000453 | 0.7242472 |
| A_51_P4604 | 328.2    | Detected   | 254.8    | Detected   | 302      | Detected   | 291.9    | Detected   | Rsf1          | 0.889396709 | 0.92017063 | 1.1456044  | 1.1852433 |
| A_55_P2038 | 196815.3 | Detected   | 177314.8 | Detected   | 200559.2 | Detected   | 175041.5 | Detected   | Rpl31-ps12    | 0.889369373 | 1.0190224  | 0.9871793  | 1.1310911 |
| A_51_P3326 | 18379    | Detected   | 14461.6  | Detected   | 18297.4  | Detected   | 16345.4  | Detected   | Surf1         | 0.889351978 | 0.99556015 | 1.13026221 | 1.2652404 |
| A_55_P2178 | 836.9    | Detected   | 917.4    | Detected   | 581.9    | Detected   | 744.2    | Detected   | Tbc1d1        | 0.889234078 | 0.6953041  | 0.81120558 | 0.6342926 |
| A_52_P6046 | 3087.9   | Detected   | 3150.2   | Detected   | 2251     | Detected   | 2745.8   | Detected   | Csrnp1        | 0.889212734 | 0.72897438 | 0.8716272  | 0.7145578 |
| A_55_P2036 | 10162.6  | Detected   | 8634.4   | Detected   | 10658.1  | Detected   | 9035.9   | Detected   | Med29         | 0.889132702 | 1.04875721 | 1.04650005 | 1.2343764 |
| A_55_P1971 | 7460.7   | Detected   | 5248.7   | Detected   | 6700.2   | Detected   | 6633     | Detected   | Lage3         | 0.889058667 | 0.89806587 | 1.2637415  | 1.2765447 |
| A_52_P5559 | 338      | Detected   | 376.9    | Detected   | 257      | Detected   | 300.5    | Detected   | Nf2           | 0.889053254 | 0.76035503 | 0.79729371 | 0.6818785 |
| A_55_P2070 | 329992.4 | Detected   | 307095.7 | Detected   | 340542.6 | Detected   | 293334.2 | Detected   | Rps2          | 0.888911987 | 1.03197104 | 0.95518824 | 1.1089136 |
| A_55_P2009 | 71.1     | Detected   | 67.3     | Detected   | 53.1     | Detected   | 63.2     | Detected   | Zmiz1         | 0.888888889 | 0.74683544 | 0.93907875 | 0.7890045 |

|            |          |            |          |           |          |          |          |            |               |                   |            |            |           |
|------------|----------|------------|----------|-----------|----------|----------|----------|------------|---------------|-------------------|------------|------------|-----------|
| A_55_P2075 | 11.7     | Not Detect | 18.8     | Detected  | 20.6     | Detected | 10.4     | Not Detect | Tti2          | 0.888888889       | 1.76068376 | 0.55319149 | 1.0957447 |
| A_55_P2118 | 41.4     | Detected   | 45.2     | Detected  | 30.9     | Detected | 36.8     | Not Detect | Cnot4         | 0.888888889       | 0.74637681 | 0.81415929 | 0.6836283 |
| A_55_P2267 | 10.8     | Not Detect | 19       | Detected  | 20.6     | Detected | 9.6      | Not Detect | 4930471G03Rik | 0.888888889       | 1.90740741 | 0.50526316 | 1.0842105 |
| A_55_P2066 | 13377.1  | Detected   | 7215.4   | Compromis | 13884    | Detected | 11890.4  | Detected   | Noa1          | 0.888862309       | 1.03789312 | 1.64791973 | 1.9242176 |
| A_55_P2137 | 573.1    | Detected   | 401.2    | Detected  | 499      | Detected | 509.4    | Detected   | Gm13247       | 0.888850113       | 0.87070319 | 1.26969093 | 1.2437687 |
| A_55_P2053 | 9508     | Detected   | 6919.7   | Detected  | 9983.4   | Detected | 8451     | Detected   | LOC100861784  | 0.888830459       | 1.05       | 1.22129572 | 1.4427504 |
| A_52_P5663 | 5320.7   | Detected   | 4841.3   | Detected  | 3871.2   | Detected | 4729.1   | Detected   | Nras          | 0.888811623       | 0.72757344 | 0.97682441 | 0.7996199 |
| A_52_P5540 | 248.1    | Detected   | 295.1    | Detected  | 216.1    | Detected | 220.5    | Detected   | Rabl2         | 0.888754534       | 0.87101975 | 0.74720434 | 0.7322941 |
| A_55_P2097 | 177934.7 | Detected   | 171963.3 | Detected  | 156273.3 | Detected | 158133.4 | Detected   | Creb5         | 0.888715917       | 0.87826208 | 0.91957644 | 0.9087596 |
| A_51_P2281 | 11931.1  | Detected   | 11435.3  | Detected  | 14019.8  | Detected | 10601.5  | Detected   | Ociad1        | 0.88856015        | 1.17506349 | 0.92708543 | 1.2260107 |
| A_55_P1974 | 226      | Detected   | 180.8    | Detected  | 196.8    | Detected | 200.8    | Detected   | Zgpat         | 0.888495575       | 0.87079646 | 1.11061947 | 1.0884956 |
| A_55_P2112 | 412.3    | Detected   | 661.1    | Detected  | 339.9    | Detected | 366.3    | Detected   | Ern1          | 0.888430754       | 0.82439971 | 0.55407654 | 0.5141431 |
| A_51_P1212 | 24672.7  | Detected   | 27149.5  | Detected  | 23361.2  | Detected | 21918.5  | Detected   | Ascc2         | 0.888370547       | 0.94684408 | 0.8073261  | 0.8604652 |
| A_52_P1533 | 598.3    | Detected   | 440      | Detected  | 587.7    | Detected | 531.5    | Detected   |               | 2-Sep 0.888350326 | 0.98228314 | 1.20795455 | 1.3356818 |
| A_51_P2126 | 1308.5   | Detected   | 1129     | Detected  | 1406.5   | Detected | 1162.4   | Detected   | Cwf1911       | 0.888345434       | 1.07489492 | 1.0295837  | 1.2457927 |
| A_55_P1984 | 346.8    | Detected   | 268.5    | Detected  | 358.6    | Detected | 308      | Detected   | Wdr41         | 0.888119954       | 1.03402537 | 1.14711359 | 1.335568  |
| A_51_P1064 | 243.1    | Detected   | 892.5    | Detected  | 124.2    | Detected | 215.9    | Detected   | Speg          | 0.888111888       | 0.51090086 | 0.24190476 | 0.1391597 |
| A_55_P2058 | 1343.7   | Detected   | 1357.2   | Detected  | 1287.8   | Detected | 1193.3   | Detected   | Smek2         | 0.888070254       | 0.95839845 | 0.87923666 | 0.9488653 |
| A_55_P2162 | 15011.9  | Detected   | 12989    | Detected  | 13866.8  | Detected | 13330.8  | Detected   | Txndc9        | 0.888015508       | 0.92372052 | 1.02631457 | 1.0675803 |
| A_55_P1999 | 59.8     | Detected   | 35.2     | Detected  | 33.5     | Detected | 53.1     | Detected   | Cdk12         | 0.887959866       | 0.56020067 | 1.50852273 | 0.9517045 |
| A_55_P1999 | 480.1    | Detected   | 506.6    | Detected  | 497.2    | Detected | 426.3    | Detected   | Pip5k1a       | 0.887940012       | 1.03561758 | 0.8414923  | 0.9814449 |
| A_55_P2036 | 4403.2   | Detected   | 5067.9   | Detected  | 3785.3   | Detected | 3909.7   | Detected   | Rabl2         | 0.88792242        | 0.85967024 | 0.77146353 | 0.7469169 |
| A_52_P3286 | 2427.9   | Detected   | 2200.4   | Detected  | 1424.1   | Detected | 2155.7   | Detected   | Prps2         | 0.887886651       | 0.58655628 | 0.97968551 | 0.6472005 |
| A_55_P2161 | 30167.7  | Detected   | 34738.3  | Detected  | 30498.3  | Detected | 26785.3  | Detected   | Ddx21         | 0.887880084       | 1.01095874 | 0.77105961 | 0.8779445 |
| A_55_P2066 | 29422.8  | Detected   | 25470.9  | Detected  | 30270.2  | Detected | 26122.5  | Detected   | Fam104a       | 0.887831885       | 1.02880079 | 1.02558213 | 1.1884229 |
| A_55_P1957 | 376678   | Detected   | 348512.4 | Detected  | 410105.5 | Detected | 334425.2 | Detected   | Rpl37a        | 0.8878278         | 1.08874291 | 0.95957906 | 1.1767314 |
| A_51_P4790 | 21616    | Detected   | 19566.8  | Detected  | 25848.1  | Detected | 19191.2  | Detected   | Nif311        | 0.887823834       | 1.19578553 | 0.98080422 | 1.3210183 |
| A_51_P1899 | 30258.3  | Detected   | 31819.7  | Detected  | 31654.8  | Detected | 26863.1  | Detected   | Nol12         | 0.887792771       | 1.04615263 | 0.84422858 | 0.9948177 |
| A_55_P2145 | 122.9    | Detected   | 111.5    | Detected  | 95       | Detected | 109.1    | Detected   | Gm826         | 0.887713588       | 0.77298617 | 0.97847534 | 0.8520179 |
| A_55_P2060 | 146.9    | Detected   | 127.8    | Detected  | 122.8    | Detected | 130.4    | Detected   | Zfp563        | 0.887678693       | 0.83594282 | 1.02034429 | 0.9608764 |
| A_55_P2107 | 10523.1  | Detected   | 8605.9   | Detected  | 9534     | Detected | 9341.1   | Detected   | Hnrnpk        | 0.887675685       | 0.90600679 | 1.08542976 | 1.1078446 |
| A_55_P2139 | 5438.8   | Detected   | 5586     | Detected  | 6027.8   | Detected | 4827.7   | Detected   | Cdc26         | 0.887640656       | 1.10829595 | 0.86424991 | 1.0790906 |
| A_52_P6492 | 8620.4   | Detected   | 7905.3   | Detected  | 8671.1   | Detected | 7651.8   | Detected   | Nras          | 0.887638625       | 1.0058814  | 0.96793291 | 1.0968717 |
| A_55_P1978 | 175584.8 | Detected   | 174736.1 | Detected  | 189118.5 | Detected | 155854   | Detected   | Rpl17         | 0.887628086       | 1.07707786 | 0.89193933 | 1.0823093 |
| A_51_P1164 | 457.4    | Detected   | 443.7    | Detected  | 418.3    | Detected | 406      | Detected   | Pald1         | 0.887625711       | 0.91451683 | 0.91503268 | 0.9427541 |
| A_55_P2032 | 160624.1 | Detected   | 148984.7 | Detected  | 139242.3 | Detected | 142570.4 | Detected   | LOC100048345  | 0.887602794       | 0.86688299 | 0.95694659 | 0.9346081 |
| A_55_P2094 | 6247.2   | Detected   | 4464     | Detected  | 3924.7   | Detected | 5544.7   | Detected   | Gm15800       | 0.887549622       | 0.62823345 | 1.24209229 | 0.8791891 |
| A_51_P2298 | 47147.6  | Detected   | 53249.8  | Detected  | 49077.6  | Detected | 41844.6  | Detected   | Eif2b2        | 0.887523437       | 1.04093528 | 0.78581704 | 0.9216485 |
| A_55_P2033 | 7665.9   | Detected   | 5487.8   | Detected  | 7713     | Detected | 6802.4   | Detected   | Ppm1m         | 0.887358301       | 1.00614409 | 1.23954955 | 1.4054812 |
| A_55_P2004 | 1557     | Detected   | 1487.9   | Detected  | 1332.2   | Detected | 1381.6   | Detected   | Dnajc25       | 0.887347463       | 0.85561978 | 0.92855703 | 0.8953559 |

|            |          |            |          |          |          |            |          |            |               |             |            |            |           |
|------------|----------|------------|----------|----------|----------|------------|----------|------------|---------------|-------------|------------|------------|-----------|
| A_51_P2120 | 30669.8  | Detected   | 27202.6  | Detected | 25093.7  | Detected   | 27214    | Detected   | Sart3         | 0.887322382 | 0.81818923 | 1.00041908 | 0.9224743 |
| A_55_P2161 | 311.3    | Detected   | 185.2    | Detected | 339.7    | Detected   | 276.2    | Detected   | Rabgap1       | 0.887247029 | 1.09123032 | 1.49136069 | 1.8342333 |
| A_55_P2135 | 7782.9   | Detected   | 6549.9   | Detected | 7148.7   | Detected   | 6905.3   | Detected   | Fam89b        | 0.887239975 | 0.91851366 | 1.05426037 | 1.0914212 |
| A_55_P1982 | 25.7     | Detected   | 24.7     | Detected | 19.1     | Detected   | 22.8     | Not Detect | Gm14496       | 0.887159533 | 0.74319066 | 0.92307692 | 0.7732794 |
| A_55_P2212 | 268.5    | Detected   | 188.2    | Detected | 144.4    | Detected   | 238.2    | Detected   | C030005K06Rik | 0.887150838 | 0.53780261 | 1.26567481 | 0.7672689 |
| A_55_P2251 | 63.8     | Detected   | 48.6     | Detected | 53.8     | Detected   | 56.6     | Detected   | B230214O09Rik | 0.887147335 | 0.84326019 | 1.16460905 | 1.1069959 |
| A_55_P2160 | 15212.5  | Detected   | 13678.5  | Detected | 15754.7  | Detected   | 13495.5  | Detected   | Mrps17        | 0.887132293 | 1.03564174 | 0.98662134 | 1.1517856 |
| A_51_P4122 | 1285.2   | Detected   | 1172.7   | Detected | 1076.2   | Detected   | 1140.1   | Detected   | Rapgef6       | 0.887099284 | 0.8373794  | 0.9722009  | 0.9177113 |
| A_55_P1969 | 13837.6  | Detected   | 13166.3  | Detected | 12191.2  | Detected   | 12275.1  | Detected   | LOC101056627  | 0.88708302  | 0.88101983 | 0.93231204 | 0.9259397 |
| A_55_P2106 | 4061.9   | Detected   | 3402.4   | Detected | 3538     | Detected   | 3602.9   | Detected   | Haus7         | 0.886998695 | 0.87102095 | 1.05892899 | 1.0398542 |
| A_55_P2043 | 159723.3 | Detected   | 156573.6 | Detected | 142511.4 | Detected   | 141667.6 | Detected   | Ccdc138       | 0.88695638  | 0.89223927 | 0.90479877 | 0.9101879 |
| A_55_P1987 | 68.1     | Detected   | 74.9     | Detected | 61.4     | Detected   | 60.4     | Detected   | Glcci1        | 0.886930984 | 0.90161527 | 0.80640854 | 0.8197597 |
| A_55_P2009 | 39242.7  | Detected   | 40994.3  | Detected | 38989.4  | Detected   | 34802.2  | Detected   | Psmc1         | 0.886845197 | 0.9935453  | 0.84895217 | 0.9510932 |
| A_66_P1086 | 9.7      | Not Detect | 16.2     | Detected | 10.2     | Not Detect | 8.6      | Not Detect | LOC101055871  | 0.886597938 | 1.05154639 | 0.5308642  | 0.6296296 |
| A_55_P2078 | 2873.8   | Detected   | 2289.1   | Detected | 3027.8   | Detected   | 2547.9   | Detected   | Mettl5        | 0.886596144 | 1.05358758 | 1.11305753 | 1.3227032 |
| A_52_P4982 | 75336.9  | Detected   | 56032.5  | Detected | 77765.9  | Detected   | 66788.3  | Detected   | Hist1h2ak     | 0.886528381 | 1.03224184 | 1.19195645 | 1.3878713 |
| A_55_P1955 | 45715.1  | Detected   | 34477    | Detected | 63461.5  | Detected   | 40526.3  | Detected   | Nlrp1a        | 0.886497022 | 1.38819559 | 1.175459   | 1.8406909 |
| A_52_P1236 | 22744.4  | Detected   | 17055.8  | Detected | 16298.6  | Detected   | 20161.6  | Detected   | E130304I02Rik | 0.886442377 | 0.71659837 | 1.18209641 | 0.9556045 |
| A_51_P1952 | 8470.5   | Detected   | 6541.8   | Detected | 7844.1   | Detected   | 7508.3   | Detected   | Gpatch11      | 0.886405761 | 0.92604923 | 1.14774221 | 1.1990736 |
| A_55_P2001 | 89795.5  | Detected   | 83071.5  | Detected | 94574    | Detected   | 79594.7  | Detected   | Rpl31-ps12    | 0.886399653 | 1.05321536 | 0.9581469  | 1.1384651 |
| A_55_P2058 | 4731.1   | Detected   | 3746.6   | Detected | 3783.1   | Detected   | 4193.5   | Detected   | H2afy         | 0.886368921 | 0.79962377 | 1.11928148 | 1.0097422 |
| A_51_P2976 | 39.6     | Detected   | 47.3     | Detected | 26.9     | Detected   | 35.1     | Not Detect | Hcls1         | 0.886363636 | 0.67929293 | 0.74207188 | 0.5687104 |
| A_55_P2400 | 20512.8  | Detected   | 15458.8  | Detected | 14716.2  | Detected   | 18179    | Detected   | Arhgap21      | 0.886227136 | 0.71741547 | 1.1759645  | 0.9519626 |
| A_55_P2005 | 717.1    | Detected   | 604.7    | Detected | 573.9    | Detected   | 635.5    | Detected   | Zfp280d       | 0.886208339 | 0.80030679 | 1.05093435 | 0.9490657 |
| A_52_P8146 | 18447.7  | Detected   | 14016.5  | Detected | 19423.5  | Detected   | 16346.9  | Detected   | Psma4         | 0.886121305 | 1.05289548 | 1.16626119 | 1.3857596 |
| A_55_P2073 | 94.8     | Detected   | 60       | Detected | 52.2     | Detected   | 84       | Detected   | Manbal        | 0.886075949 | 0.55063291 | 1.4        | 0.87      |
| A_51_P2654 | 186161.7 | Detected   | 75019.5  | Detected | 31694.1  | Detected   | 164947.3 | Detected   | Ly6a          | 0.886043155 | 0.17025038 | 2.19872566 | 0.4224782 |
| A_55_P2180 | 130.7    | Detected   | 118.7    | Detected | 184.9    | Detected   | 115.8    | Detected   | Prr22         | 0.88599847  | 1.41469013 | 0.97556866 | 1.5577085 |
| A_66_P1123 | 37959.6  | Detected   | 24007.6  | Detected | 46961.3  | Detected   | 33625.2  | Detected   | BC029722      | 0.885815446 | 1.23713896 | 1.40060647 | 1.9561014 |
| A_52_P5727 | 7368.4   | Detected   | 5413.4   | Detected | 5139.7   | Detected   | 6526.6   | Detected   | Gxylt1        | 0.885755388 | 0.69753271 | 1.20563786 | 0.9494403 |
| A_52_P5044 | 2159.8   | Detected   | 2029.1   | Detected | 2799.4   | Detected   | 1913     | Detected   | Rnf138        | 0.88573016  | 1.29613853 | 0.94278251 | 1.3796264 |
| A_55_P2023 | 10.5     | Not Detect | 17.3     | Detected | 3.4      | Not Detect | 9.3      | Not Detect | Gm20877       | 0.885714286 | 0.32380952 | 0.53757225 | 0.1965318 |
| A_55_P1997 | 9451.6   | Detected   | 7132.1   | Detected | 6985.3   | Detected   | 8370.7   | Detected   | Exoc6b        | 0.88563841  | 0.73906005 | 1.17366554 | 0.979417  |
| A_55_P2000 | 136.4    | Detected   | 122.9    | Detected | 136.2    | Detected   | 120.8    | Detected   | Zfp58         | 0.885630499 | 0.99853372 | 0.98291294 | 1.1082181 |
| A_52_P4670 | 3641.6   | Detected   | 2867.5   | Detected | 3373.6   | Detected   | 3225     | Detected   | Wdr48         | 0.885599736 | 0.92640598 | 1.12467306 | 1.1764952 |
| A_55_P2183 | 6730.7   | Detected   | 6745.8   | Detected | 7010.1   | Detected   | 5960.5   | Detected   | Rgs19         | 0.885569109 | 1.04151128 | 0.88358682 | 1.0391799 |
| A_52_P4326 | 2092.7   | Detected   | 1782.6   | Detected | 2296     | Detected   | 1853.2   | Detected   | Ctdsp2        | 0.885554547 | 1.09714723 | 1.03960507 | 1.2880063 |
| A_55_P1983 | 4692.9   | Detected   | 4337     | Detected | 4664.7   | Detected   | 4155.6   | Detected   | Rcbtb1        | 0.885507895 | 0.99399092 | 0.95817385 | 1.0755591 |
| A_55_P2003 | 348.4    | Detected   | 298.6    | Detected | 243.8    | Detected   | 308.5    | Detected   | Sh2d5         | 0.885476464 | 0.69977038 | 1.03315472 | 0.8164769 |
| A_55_P2132 | 146701.6 | Detected   | 150243.7 | Detected | 158585.8 | Detected   | 129890   | Detected   | ND3           | 0.88540275  | 1.08100934 | 0.86452876 | 1.0555238 |

|            |          |            |          |            |          |            |          |            |               |             |            |            |           |
|------------|----------|------------|----------|------------|----------|------------|----------|------------|---------------|-------------|------------|------------|-----------|
| A_52_P271  | 4361.7   | Detected   | 4670     | Detected   | 6533.4   | Detected   | 3861.8   | Detected   | Dnajs18       | 0.885388725 | 1.49790219 | 0.8269379  | 1.399015  |
| A_65_P1320 | 5776     | Detected   | 4454.4   | Detected   | 4522.7   | Detected   | 5113.9   | Detected   | Ctsd          | 0.885370499 | 0.78301593 | 1.14805585 | 1.0153332 |
| A_55_P2041 | 71763.2  | Detected   | 42506.8  | Detected   | 63774.2  | Detected   | 63536.3  | Detected   | Scand1        | 0.885360463 | 0.88867553 | 1.49473261 | 1.5003294 |
| A_55_P1974 | 1776.2   | Detected   | 1325.9   | Detected   | 1518     | Detected   | 1572.5   | Detected   | Vangl1        | 0.885316969 | 0.85463349 | 1.18598688 | 1.1448827 |
| A_55_P2052 | 278694.6 | Detected   | 253751.4 | Detected   | 272705.1 | Detected   | 246732.5 | Detected   | Rpl6          | 0.885314965 | 0.97850873 | 0.97233946 | 1.074694  |
| A_55_P1982 | 879.7    | Detected   | 636.2    | Detected   | 776.3    | Detected   | 778.8    | Detected   | Homer1        | 0.885301807 | 0.88245993 | 1.22414335 | 1.2202138 |
| A_55_P2165 | 292.9    | Detected   | 272.3    | Detected   | 237.8    | Detected   | 259.3    | Detected   | Nrxn3         | 0.88528508  | 0.81188119 | 0.95225854 | 0.8733015 |
| A_55_P2058 | 3453.1   | Detected   | 3742.8   | Detected   | 3705     | Detected   | 3056.8   | Detected   | Cluh          | 0.885233558 | 1.07294894 | 0.81671476 | 0.9899006 |
| A_55_P2101 | 27       | Detected   | 25.4     | Detected   | 16.5     | Not Detect | 23.9     | Not Detect | 6430573P05Rik | 0.885185185 | 0.61111111 | 0.94094488 | 0.6496063 |
| A_55_P1980 | 48023.8  | Detected   | 32825.6  | Detected   | 48906.3  | Detected   | 42509.1  | Detected   | Romo1         | 0.885167355 | 1.01837631 | 1.29499842 | 1.4898829 |
| A_51_P2463 | 33301    | Detected   | 28390.1  | Detected   | 29389.6  | Detected   | 29475.9  | Detected   | Rfc5          | 0.885135582 | 0.88254407 | 1.03824573 | 1.0352059 |
| A_52_P1105 | 896.1    | Detected   | 633.4    | Detected   | 700.9    | Detected   | 793.1    | Detected   | Ttk           | 0.885057471 | 0.78216717 | 1.25213135 | 1.1065677 |
| A_55_P1961 | 60.9     | Detected   | 78.3     | Detected   | 3317.3   | Detected   | 53.9     | Detected   | H19           | 0.885057471 | 54.4712644 | 0.68837803 | 42.366539 |
| A_66_P1002 | 1925.6   | Detected   | 1277.7   | Detected   | 1699.9   | Detected   | 1704.2   | Detected   | Paxbp1        | 0.88502285  | 0.88278978 | 1.33380293 | 1.3304375 |
| A_66_P1116 | 12195.3  | Detected   | 11648    | Detected   | 12230.4  | Detected   | 10792.2  | Detected   | Gm9372        | 0.88494748  | 1.00287816 | 0.92652816 | 1.05      |
| A_55_P2076 | 36.5     | Detected   | 26       | Detected   | 22.2     | Detected   | 32.3     | Not Detect | Cacna1f       | 0.884931507 | 0.60821918 | 1.24230769 | 0.8538462 |
| A_55_P1974 | 778.1    | Detected   | 824      | Detected   | 541.9    | Detected   | 688.5    | Detected   | Gm5067        | 0.884847706 | 0.69644005 | 0.83555825 | 0.6576456 |
| A_55_P2151 | 25489.5  | Detected   | 27740.1  | Detected   | 25490.4  | Detected   | 22553.3  | Detected   | Acp1          | 0.88480747  | 1.00003531 | 0.81302158 | 0.9189008 |
| A_55_P1999 | 2811.3   | Detected   | 2831.5   | Detected   | 2070.4   | Detected   | 2487.1   | Detected   | A630007B06Rik | 0.884679686 | 0.73645644 | 0.87836836 | 0.7312025 |
| A_52_P1699 | 6317.1   | Detected   | 5314     | Detected   | 5316.8   | Detected   | 5588.5   | Detected   | Slc25a51      | 0.884662266 | 0.84165202 | 1.051656   | 1.0005269 |
| A_65_P1163 | 640.6    | Detected   | 650.5    | Detected   | 652.5    | Detected   | 566.7    | Detected   | Usp14         | 0.884639401 | 1.01857633 | 0.87117602 | 1.0030746 |
| A_55_P1965 | 43327.8  | Detected   | 35022.8  | Detected   | 42434.8  | Detected   | 38329    | Detected   | Uqcrb         | 0.884628345 | 0.97938968 | 1.09440136 | 1.2116336 |
| A_51_P3041 | 98.8     | Detected   | 60.7     | Detected   | 74.1     | Detected   | 87.4     | Detected   | Serac1        | 0.884615385 | 0.75       | 1.4398682  | 1.2207578 |
| A_55_P2162 | 10.4     | Not Detect | 7.1      | Not Detect | 17       | Detected   | 9.2      | Not Detect | Cyp2b23       | 0.884615385 | 1.63461538 | 1.29577465 | 2.3943662 |
| A_55_P2047 | 10.4     | Not Detect | 16.7     | Detected   | 12.8     | Not Detect | 9.2      | Not Detect | Adcy5         | 0.884615385 | 1.23076923 | 0.5508982  | 0.7664671 |
| A_52_P6055 | 76.2     | Detected   | 37.5     | Detected   | 66       | Detected   | 67.4     | Detected   | Sdccag3       | 0.884514436 | 0.86614173 | 1.79733333 | 1.76      |
| A_55_P1954 | 96.1     | Detected   | 53.3     | Detected   | 79.6     | Detected   | 85       | Detected   | Phf1          | 0.884495317 | 0.82830385 | 1.59474672 | 1.4934334 |
| A_55_P1971 | 4886.4   | Detected   | 3448.6   | Detected   | 517.3    | Detected   | 4321.8   | Detected   | Atp11a        | 0.884454813 | 0.10586526 | 1.2532042  | 0.1500029 |
| A_55_P1998 | 4518.5   | Detected   | 3986.1   | Detected   | 3854.6   | Detected   | 3996.3   | Detected   | Tmem214       | 0.884430674 | 0.85307071 | 1.00255889 | 0.9670104 |
| A_52_P1444 | 420.5    | Detected   | 362.9    | Detected   | 278.8    | Detected   | 371.9    | Detected   | Selrc1        | 0.884423306 | 0.66302021 | 1.02480022 | 0.7682557 |
| A_55_P2075 | 10138.7  | Detected   | 8311.3   | Detected   | 10782.2  | Detected   | 8966.8   | Detected   | Gm5215        | 0.884413189 | 1.06346968 | 1.07886853 | 1.297294  |
| A_51_P2348 | 1467.1   | Detected   | 1198.7   | Detected   | 1412.5   | Detected   | 1297.5   | Detected   | Sfxn5         | 0.884397792 | 0.96278372 | 1.08242262 | 1.1783599 |
| A_66_P1069 | 44.1     | Detected   | 30.8     | Detected   | 25.1     | Detected   | 39       | Not Detect | Gm3916        | 0.884353741 | 0.569161   | 1.26623377 | 0.8149351 |
| A_52_P5899 | 26.8     | Detected   | 32.2     | Detected   | 26.2     | Detected   | 23.7     | Not Detect | Defb36        | 0.884328358 | 0.97761194 | 0.73602484 | 0.8136646 |
| A_55_P1971 | 6718.2   | Detected   | 3742.5   | Detected   | 5076.2   | Detected   | 5940.4   | Detected   | Jak2          | 0.884224941 | 0.75558929 | 1.58728123 | 1.3563661 |
| A_66_P1388 | 11943    | Detected   | 12381.4  | Detected   | 18983.8  | Detected   | 10560.2  | Detected   | Ndufs8        | 0.884216696 | 1.58953362 | 0.85290839 | 1.5332515 |
| A_51_P2948 | 8737     | Detected   | 7315.1   | Detected   | 7585.9   | Detected   | 7724.3   | Detected   | Stom          | 0.884090649 | 0.86824997 | 1.05593908 | 1.0370193 |
| A_55_P2367 | 521.8    | Detected   | 236.7    | Detected   | 243.8    | Detected   | 461.3    | Detected   | Efcab4a       | 0.884055194 | 0.46722882 | 1.94888044 | 1.0299958 |
| A_51_P2343 | 3505     | Detected   | 3347     | Detected   | 3204.5   | Detected   | 3098.2   | Detected   | Rpa2          | 0.883937233 | 0.91426534 | 0.92566477 | 0.9574246 |
| A_55_P2147 | 43.9     | Detected   | 39.3     | Detected   | 65.7     | Detected   | 38.8     | Not Detect | Dpysl4        | 0.883826879 | 1.49658314 | 0.98727735 | 1.6717557 |

|            |         |          |         |          |         |            |         |            |               |             |            |            |           |
|------------|---------|----------|---------|----------|---------|------------|---------|------------|---------------|-------------|------------|------------|-----------|
| A_51_P1072 | 43031.9 | Detected | 34766.4 | Detected | 40693.1 | Detected   | 38032.3 | Detected   | Abcf1         | 0.883816425 | 0.94564962 | 1.0939384  | 1.1704721 |
| A_66_P1039 | 56.8    | Detected | 87.3    | Detected | 61.9    | Detected   | 50.2    | Detected   | Acp1          | 0.883802817 | 1.08978873 | 0.57502864 | 0.7090493 |
| A_51_P5131 | 47312.6 | Detected | 47635.7 | Detected | 45006.2 | Detected   | 41814.7 | Detected   | Tra2a         | 0.883796283 | 0.95125189 | 0.87780173 | 0.9447998 |
| A_51_P2355 | 2770.9  | Detected | 2593.1  | Detected | 3560    | Detected   | 2448.8  | Detected   | Mtmr9         | 0.88375618  | 1.28478112 | 0.94435232 | 1.3728742 |
| A_55_P1992 | 280.3   | Detected | 103.6   | Detected | 254.9   | Detected   | 247.7   | Detected   | Ptprj         | 0.88369604  | 0.9093828  | 2.39092664 | 2.4604247 |
| A_55_P2100 | 82.5    | Detected | 92.9    | Detected | 106.7   | Detected   | 72.9    | Detected   | Gm12216       | 0.883636364 | 1.29333333 | 0.78471475 | 1.1485468 |
| A_55_P2161 | 575.6   | Detected | 443     | Detected | 46.4    | Detected   | 508.6   | Detected   | Thsd7a        | 0.883599722 | 0.08061154 | 1.14808126 | 0.1047404 |
| A_55_P2115 | 37.8    | Detected | 54.6    | Detected | 8.4     | Not Detect | 33.4    | Not Detect | 5930422O12Rik | 0.883597884 | 0.22222222 | 0.61172161 | 0.1538462 |
| A_51_P3620 | 83390.9 | Detected | 60802.9 | Detected | 97177.6 | Detected   | 73683.3 | Detected   | Atp5e         | 0.883589217 | 1.16532619 | 1.21183858 | 1.5982396 |
| A_52_P4068 | 4671.3  | Detected | 5149    | Detected | 4065.7  | Detected   | 4127.2  | Detected   | Dkc1          | 0.883522788 | 0.87035729 | 0.8015537  | 0.7896096 |
| A_55_P1958 | 20.6    | Detected | 22.9    | Detected | 14.6    | Not Detect | 18.2    | Not Detect | Olf965        | 0.883495146 | 0.70873786 | 0.79475983 | 0.6375546 |
| A_55_P2128 | 7604.5  | Detected | 6675.9  | Detected | 7769    | Detected   | 6718.2  | Detected   | Gmn           | 0.883450588 | 1.02163193 | 1.00633622 | 1.1637382 |
| A_55_P2271 | 290.7   | Detected | 345.2   | Detected | 256.8   | Detected   | 256.8   | Detected   | Cyb5d1        | 0.883384933 | 0.88338493 | 0.74391657 | 0.7439166 |
| A_51_P1644 | 9088.1  | Detected | 9137    | Detected | 7258.9  | Detected   | 8026.7  | Detected   | Eef1e1        | 0.883209912 | 0.79872581 | 0.87848309 | 0.7944511 |
| A_55_P2080 | 464.8   | Detected | 550.8   | Detected | 757.3   | Detected   | 410.5   | Detected   | Chka          | 0.883175559 | 1.62930293 | 0.74527959 | 1.3749092 |
| A_55_P2338 | 59.9    | Detected | 55.3    | Detected | 51.2    | Detected   | 52.9    | Detected   | F830115B05Rik | 0.883138564 | 0.85475793 | 0.95660036 | 0.925859  |
| A_55_P2178 | 691.3   | Detected | 598.6   | Detected | 634.7   | Detected   | 610.5   | Detected   | Wdr45b        | 0.883118762 | 0.91812527 | 1.01987972 | 1.0603074 |
| A_52_P5719 | 890.5   | Detected | 1144.3  | Detected | 662     | Detected   | 786.4   | Detected   | Arv1          | 0.883099382 | 0.74340258 | 0.68723237 | 0.5785196 |
| A_51_P5207 | 553.2   | Detected | 569.4   | Detected | 637.3   | Detected   | 488.5   | Detected   | Nupl1         | 0.883044107 | 1.15202458 | 0.85792062 | 1.1192483 |
| A_55_P2062 | 11280   | Detected | 7711.1  | Detected | 10282.7 | Detected   | 9960.4  | Detected   | Atf2          | 0.883014184 | 0.91158688 | 1.29169639 | 1.3334933 |
| A_55_P2114 | 35063.5 | Detected | 23950.9 | Detected | 37026.3 | Detected   | 30961.4 | Detected   | Romo1         | 0.883009397 | 1.05597844 | 1.29270299 | 1.5459252 |
| A_55_P2002 | 151.2   | Detected | 132.5   | Detected | 121.4   | Detected   | 133.5   | Detected   | Fam160a1      | 0.882936508 | 0.80291005 | 1.00754717 | 0.9162264 |
| A_51_P2749 | 15281.4 | Detected | 14705.8 | Detected | 20693   | Detected   | 13492   | Detected   | Atad1         | 0.882903399 | 1.35412986 | 0.91746114 | 1.4071319 |
| A_55_P2061 | 179.3   | Detected | 180     | Detected | 169.8   | Detected   | 158.3   | Detected   | Pnlcd1        | 0.882877858 | 0.94701617 | 0.87944444 | 0.9433333 |
| A_51_P3135 | 84.5    | Detected | 68.6    | Detected | 84.2    | Detected   | 74.6    | Detected   | Olf577        | 0.882840237 | 0.9964497  | 1.08746356 | 1.2274052 |
| A_51_P1604 | 607.6   | Detected | 534.3   | Detected | 594.3   | Detected   | 536.4   | Detected   | Yod1          | 0.882817643 | 0.9781106  | 1.00393038 | 1.1122965 |
| A_55_P2061 | 67916.7 | Detected | 64025.8 | Detected | 60908.7 | Detected   | 59952.7 | Detected   | Psmd1         | 0.882738708 | 0.89681477 | 0.93638346 | 0.9513149 |
| A_52_P5805 | 1973.1  | Detected | 1852.2  | Detected | 1365.1  | Detected   | 1741.5  | Detected   | Usp34         | 0.882621256 | 0.69185546 | 0.94023324 | 0.7370154 |
| A_66_P1392 | 5513.2  | Detected | 4660.4  | Detected | 3961.4  | Detected   | 4865.9  | Detected   | Kctd3         | 0.882590873 | 0.71853007 | 1.04409493 | 0.8500129 |
| A_55_P2378 | 228.2   | Detected | 122.1   | Detected | 131.6   | Detected   | 201.4   | Detected   | LOC553096     | 0.882559159 | 0.57668712 | 1.64946765 | 1.0778051 |
| A_52_P1239 | 1187.7  | Detected | 691.8   | Detected | 1024.3  | Detected   | 1048.2  | Detected   | Mospd2        | 0.882546097 | 0.86242317 | 1.5151778  | 1.4806302 |
| A_55_P1966 | 3427.4  | Detected | 1419.2  | Detected | 6324.1  | Detected   | 3024.8  | Detected   | Gstm1         | 0.882534866 | 1.8451596  | 2.1313416  | 4.456102  |
| A_52_P1545 | 1116.7  | Detected | 827.6   | Detected | 1270.5  | Detected   | 985.5   | Detected   | Ube2q2        | 0.88251097  | 1.13772723 | 1.19079265 | 1.5351619 |
| A_55_P2263 | 260.1   | Detected | 182.3   | Detected | 124.3   | Detected   | 229.5   | Detected   | 6330526H18Rik | 0.882352941 | 0.47789312 | 1.25891388 | 0.6818431 |
| A_55_P1973 | 9423.5  | Detected | 5163.8  | Detected | 8728.8  | Detected   | 8314.6  | Detected   | Ppp1r13b      | 0.8823261   | 0.92628004 | 1.6101708  | 1.6903831 |
| A_66_P1020 | 2767.5  | Detected | 1596    | Detected | 2402.1  | Detected   | 2441.8  | Detected   | Tbc1d13       | 0.882312556 | 0.86796748 | 1.52994987 | 1.5050752 |
| A_51_P3801 | 29549.3 | Detected | 20065.7 | Detected | 16487.6 | Detected   | 26066.7 | Detected   | Id3           | 0.882142724 | 0.55796922 | 1.29906756 | 0.8216808 |
| A_51_P2478 | 83341.1 | Detected | 66660.3 | Detected | 93300.7 | Detected   | 73516.6 | Detected   | Ndufb8        | 0.882116987 | 1.11950406 | 1.10285432 | 1.3996442 |
| A_52_P1084 | 258.6   | Detected | 238.8   | Detected | 210.6   | Detected   | 228.1   | Detected   | Wac           | 0.882057231 | 0.81438515 | 0.95519263 | 0.8819095 |
| A_55_P2086 | 1834.6  | Detected | 1994    | Detected | 1470.1  | Detected   | 1618.1  | Detected   | Slc45a4       | 0.881990625 | 0.80131909 | 0.81148445 | 0.7372618 |



|            |                   |                   |                   |                   |               |             |            |            |           |
|------------|-------------------|-------------------|-------------------|-------------------|---------------|-------------|------------|------------|-----------|
| A_65_P0531 | 913.2 Detected    | 666 Detected      | 703.3 Detected    | 805.4 Detected    | Zfp182        | 0.88195357  | 0.77014893 | 1.20930931 | 1.056006  |
| A_55_P2168 | 25.4 Detected     | 25.1 Detected     | 23.3 Detected     | 22.4 Not Detect   | Gm1661        | 0.881889764 | 0.91732283 | 0.89243028 | 0.9282869 |
| A_55_P2075 | 2333.1 Detected   | 1824.2 Detected   | 2289.5 Detected   | 2057.3 Detected   | Ulk3          | 0.881788179 | 0.98131242 | 1.12778204 | 1.2550707 |
| A_55_P2211 | 1661.3 Detected   | 1509.9 Detected   | 5213.1 Detected   | 1464.9 Detected   | Fgf18         | 0.881779329 | 3.13796424 | 0.9701967  | 3.4526128 |
| A_55_P2023 | 1572 Detected     | 1328.7 Detected   | 1549.5 Detected   | 1386.1 Detected   | Zfp386        | 0.881743003 | 0.98568702 | 1.04320012 | 1.1661775 |
| A_55_P2054 | 46.5 Detected     | 36.5 Detected     | 37.6 Detected     | 41 Not Detect     | Rxfp3         | 0.88172043  | 0.80860215 | 1.12328767 | 1.030137  |
| A_55_P2091 | 13535.6 Detected  | 12719.6 Detected  | 13735 Detected    | 11933.9 Detected  | Ltbp3         | 0.881667602 | 1.01473152 | 0.93822919 | 1.0798296 |
| A_51_P5121 | 1993.1 Detected   | 2338.1 Detected   | 2515.7 Detected   | 1757.2 Detected   | Slc30a6       | 0.881641664 | 1.26220461 | 0.7515504  | 1.0759591 |
| A_52_P3085 | 239.9 Detected    | 157.2 Detected    | 217.3 Detected    | 211.5 Detected    | Chd6          | 0.881617341 | 0.90579408 | 1.34541985 | 1.3823155 |
| A_52_P1342 | 3210.1 Detected   | 2596 Detected     | 2960 Detected     | 2829.3 Detected   | Lsm11         | 0.881374412 | 0.92208965 | 1.08986903 | 1.1402157 |
| A_55_P2124 | 23.6 Detected     | 22.4 Detected     | 17.6 Not Detect   | 20.8 Not Detect   | Cyp2j13       | 0.881355932 | 0.74576271 | 0.92857143 | 0.7857143 |
| A_51_P3009 | 14519.3 Detected  | 12873.4 Detected  | 13520 Detected    | 12796 Detected    | Rbbp8         | 0.881309705 | 0.93117437 | 0.9939876  | 1.0502276 |
| A_55_P2089 | 4918.4 Detected   | 4068.6 Detected   | 5638.8 Detected   | 4333.7 Detected   | Rnf121        | 0.881119876 | 1.1464704  | 1.06515755 | 1.3859313 |
| A_55_P2017 | 28597.3 Detected  | 24149.5 Detected  | 26503.7 Detected  | 25197.1 Detected  | Igsf9         | 0.881100663 | 0.92679029 | 1.04337978 | 1.0974844 |
| A_55_P2100 | 2347.6 Detected   | 2179.7 Detected   | 1879.2 Detected   | 2068.2 Detected   | Kif2c         | 0.880984836 | 0.80047708 | 0.94884617 | 0.862137  |
| A_55_P2337 | 67.2 Detected     | 56 Detected       | 57.1 Detected     | 59.2 Detected     | C030010L15Rik | 0.880952381 | 0.84970238 | 1.05714286 | 1.0196429 |
| A_66_P1026 | 237.7 Detected    | 190.4 Detected    | 130.6 Detected    | 209.4 Detected    | Btrc          | 0.880942364 | 0.54943206 | 1.09978992 | 0.6859244 |
| A_55_P1998 | 38327.4 Detected  | 37846.2 Detected  | 39318.2 Detected  | 33763.9 Detected  | Cdk4          | 0.880933745 | 1.02585096 | 0.89213448 | 1.0388943 |
| A_55_P2073 | 24238.4 Detected  | 21561.2 Detected  | 26205.1 Detected  | 21352.4 Detected  | Elp2          | 0.880932735 | 1.08113984 | 0.99031594 | 1.2153823 |
| A_55_P2039 | 17475.8 Detected  | 17967.8 Detected  | 13995.1 Detected  | 15393.6 Detected  | Drosha        | 0.880852379 | 0.80082743 | 0.8567326  | 0.7788989 |
| A_52_P2542 | 229.1 Detected    | 200.8 Detected    | 233 Detected      | 201.8 Detected    | Slc11a2       | 0.880838062 | 1.01702313 | 1.00498008 | 1.1603586 |
| A_55_P2087 | 86511 Detected    | 84041.8 Detected  | 80544.6 Detected  | 76188 Detected    | Gps1          | 0.880674134 | 0.93103305 | 0.90654888 | 0.9583874 |
| A_55_P2029 | 789.3 Detected    | 539.2 Detected    | 579.7 Detected    | 695.1 Detected    | Osbpl1a       | 0.880653744 | 0.73444825 | 1.28913205 | 1.0751113 |
| A_55_P2060 | 58128.1 Detected  | 50092.4 Detected  | 55209.7 Detected  | 51188.4 Compromis | Apopt1        | 0.880613679 | 0.94979365 | 1.02187957 | 1.1021572 |
| A_51_P1860 | 5931.1 Detected   | 7372.7 Detected   | 6629.9 Detected   | 5222.9 Detected   | Rrp15         | 0.880595505 | 1.11781963 | 0.70841076 | 0.8992499 |
| A_55_P2245 | 31044.4 Detected  | 16875.5 Detected  | 21709.7 Detected  | 27336.9 Detected  | Lrrc8a        | 0.880574274 | 0.69931131 | 1.61991645 | 1.2864626 |
| A_51_P4076 | 5140.6 Detected   | 4385.3 Detected   | 4307 Detected     | 4526.6 Detected   | Ints3         | 0.88055869  | 0.83783994 | 1.03222128 | 0.9821449 |
| A_51_P1445 | 15.9 Detected     | 9.7 Not Detect    | 17.1 Not Detect   | 14 Not Detect     | 1700063H04Rik | 0.880503145 | 1.0754717  | 1.44329897 | 1.7628866 |
| A_52_P1032 | 418.4 Detected    | 343.3 Detected    | 377.3 Detected    | 368.4 Detected    | AA987161      | 0.880497132 | 0.90176864 | 1.07311389 | 1.0990387 |
| A_55_P2121 | 41 Detected       | 34.9 Detected     | 32.6 Detected     | 36.1 Not Detect   | Alox12b       | 0.880487805 | 0.79512195 | 1.03438395 | 0.9340974 |
| A_52_P5125 | 25.1 Detected     | 39.6 Detected     | 28.1 Detected     | 22.1 Not Detect   | Hopx          | 0.880478088 | 1.11952191 | 0.55808081 | 0.709596  |
| A_55_P2430 | 374.8 Detected    | 359.1 Detected    | 416.4 Detected    | 330 Detected      | Fam35a        | 0.880469584 | 1.11099253 | 0.91896408 | 1.1595656 |
| A_55_P2081 | 57.7 Detected     | 60.4 Detected     | 45.6 Detected     | 50.8 Detected     | Gpr25         | 0.880415945 | 0.79029463 | 0.8410596  | 0.7549669 |
| A_55_P2121 | 1602.8 Detected   | 1257.3 Detected   | 933.3 Detected    | 1410.9 Detected   | Smo           | 0.880272024 | 0.58229349 | 1.12216655 | 0.7423049 |
| A_55_P1965 | 129208.5 Detected | 104403.9 Detected | 115812.7 Detected | 113724.5 Detected | Gm6525        | 0.880162683 | 0.89632416 | 1.08927444 | 1.1092756 |
| A_55_P2149 | 87.6 Detected     | 78 Detected       | 76.7 Detected     | 77.1 Detected     | Camk2a        | 0.880136986 | 0.87557078 | 0.98846154 | 0.9833333 |
| A_55_P2095 | 16358.5 Detected  | 5790.9 Detected   | 2355.4 Detected   | 14397.2 Detected  | Ly6g          | 0.880105144 | 0.14398631 | 2.48617659 | 0.4067416 |
| A_52_P4961 | 85 Detected       | 65.7 Detected     | 58.2 Detected     | 74.8 Detected     | Zfp143        | 0.88        | 0.68470588 | 1.13850837 | 0.8858447 |
| A_52_P7950 | 67.5 Detected     | 62.7 Detected     | 87 Detected       | 59.4 Detected     | Zfp667        | 0.88        | 1.28888889 | 0.94736842 | 1.3875598 |
| A_55_P2132 | 59070.1 Detected  | 55604.8 Detected  | 52501.5 Detected  | 51979 Detected    | Sumo2         | 0.879954495 | 0.88879992 | 0.9347934  | 0.9441901 |

|            |          |          |          |          |          |          |          |            |          |             |            |            |           |
|------------|----------|----------|----------|----------|----------|----------|----------|------------|----------|-------------|------------|------------|-----------|
| A_51_P1122 | 19026.7  | Detected | 3593.4   | Detected | 29491.1  | Detected | 16740.7  | Detected   | Gsta4    | 0.879853049 | 1.54998502 | 4.65873546 | 8.2070184 |
| A_52_P1797 | 36060.6  | Detected | 32518.4  | Detected | 43144.9  | Detected | 31725.3  | Detected   | Txn14a   | 0.879777375 | 1.19645541 | 0.97561073 | 1.3267842 |
| A_51_P5031 | 1382.1   | Detected | 961.1    | Detected | 1137.5   | Detected | 1215.9   | Detected   | Rbm15b   | 0.879748209 | 0.82302294 | 1.26511289 | 1.1835397 |
| A_55_P2071 | 19981.5  | Detected | 13712.1  | Detected | 15685.9  | Detected | 17578.1  | Detected   | Rhog     | 0.87971874  | 0.78502114 | 1.28194077 | 1.1439459 |
| A_55_P1986 | 1689.3   | Detected | 1465.2   | Detected | 1977.3   | Detected | 1486     | Detected   | Ccdc126  | 0.879654295 | 1.17048482 | 1.01419601 | 1.3495086 |
| A_52_P5722 | 19126.4  | Detected | 18809.7  | Detected | 20611.1  | Detected | 16823.4  | Detected   | Laptm4a  | 0.879590514 | 1.07762569 | 0.89440023 | 1.0957697 |
| A_51_P1500 | 1404.2   | Detected | 924.1    | Detected | 1399.7   | Detected | 1235.1   | Detected   | Abhd10   | 0.879575559 | 0.99679533 | 1.33654366 | 1.5146629 |
| A_65_P0952 | 4626.1   | Detected | 4108.1   | Detected | 4665.5   | Detected | 4068.4   | Detected   | Scrn3    | 0.879444889 | 1.00851689 | 0.99033617 | 1.1356832 |
| A_51_P2141 | 5535.4   | Detected | 3239.7   | Detected | 4365.8   | Detected | 4867.8   | Detected   | Tbc1d20  | 0.879394443 | 0.78870542 | 1.50254653 | 1.3475939 |
| A_55_P2055 | 46.4     | Detected | 49.4     | Detected | 47.7     | Detected | 40.8     | Not Detect | Prss44   | 0.879310345 | 1.02801724 | 0.82591093 | 0.965587  |
| A_55_P1955 | 18607.6  | Detected | 11769.6  | Detected | 18723.9  | Detected | 16357.2  | Detected   | Fopnl    | 0.879060169 | 1.00625013 | 1.38978385 | 1.5908697 |
| A_55_P1963 | 58.7     | Detected | 69.5     | Detected | 67.8     | Detected | 51.6     | Detected   | Brwd3    | 0.879045997 | 1.15502555 | 0.74244604 | 0.9755396 |
| A_66_P1062 | 1918.8   | Detected | 1325.3   | Detected | 1816.6   | Detected | 1686.6   | Detected   | Secisbp2 | 0.878986867 | 0.94673754 | 1.27261752 | 1.3707085 |
| A_55_P1991 | 3279.9   | Detected | 2545.5   | Detected | 3248.9   | Detected | 2882.6   | Detected   | Nosip    | 0.878868258 | 0.99054849 | 1.13242978 | 1.2763308 |
| A_51_P4505 | 11735.1  | Detected | 9453.6   | Detected | 12497.6  | Detected | 10313.5  | Detected   | Tgfb2    | 0.878859149 | 1.06497601 | 1.09096006 | 1.3219937 |
| A_55_P2088 | 192.3    | Detected | 377.7    | Detected | 166.9    | Detected | 169      | Detected   | Sgsm1    | 0.878835153 | 0.86791472 | 0.44744506 | 0.4418851 |
| A_55_P2057 | 10868.4  | Detected | 9684.3   | Detected | 7827.5   | Detected | 9549     | Detected   | Tpr      | 0.878602186 | 0.72020721 | 0.98602893 | 0.808267  |
| A_55_P2161 | 608.6    | Detected | 607.8    | Detected | 642.6    | Detected | 534.7    | Detected   | Ddx23    | 0.878573776 | 1.05586592 | 0.87973017 | 1.0572557 |
| A_55_P2001 | 12149.7  | Detected | 10703.5  | Detected | 13495.1  | Detected | 10674.2  | Detected   | Smim4    | 0.878556672 | 1.11073524 | 0.99726258 | 1.2608119 |
| A_55_P2021 | 74.1     | Detected | 95.4     | Detected | 83       | Detected | 65.1     | Detected   | Fkbp1b   | 0.87854251  | 1.12010796 | 0.68238994 | 0.870021  |
| A_55_P2073 | 265023.8 | Detected | 241898.3 | Detected | 245970   | Detected | 232820.3 | Detected   | Rpl7     | 0.878488272 | 0.92810532 | 0.96247183 | 1.0168323 |
| A_55_P2032 | 74       | Detected | 64.3     | Detected | 54.9     | Detected | 65       | Detected   | Pip5k1c  | 0.878378378 | 0.74189189 | 1.01088647 | 0.8538103 |
| A_51_P2512 | 455.2    | Detected | 321      | Detected | 370.6    | Detected | 399.8    | Detected   | Psd      | 0.878295255 | 0.81414763 | 1.24548287 | 1.1545171 |
| A_55_P2088 | 30.4     | Detected | 21.3     | Detected | 27       | Detected | 26.7     | Not Detect | Syn3     | 0.878289474 | 0.88815789 | 1.25352113 | 1.2676056 |
| A_55_P2023 | 2779.4   | Detected | 2197.4   | Detected | 2581.5   | Detected | 2441.1   | Detected   | Mfap1a   | 0.878283083 | 0.92879758 | 1.1109038  | 1.1747975 |
| A_55_P1965 | 61634.8  | Detected | 45293.4  | Detected | 45338.9  | Detected | 54131.2  | Detected   | Map7d1   | 0.878257089 | 0.73560553 | 1.19512335 | 1.0010046 |
| A_55_P1955 | 93400.1  | Detected | 81071.8  | Detected | 100255.5 | Detected | 82026.5  | Detected   | Gm5908   | 0.878227111 | 1.07339821 | 1.01177598 | 1.2366261 |
| A_51_P1876 | 3457.1   | Detected | 2275.6   | Detected | 2575.2   | Detected | 3036.1   | Detected   | Rmi1     | 0.878221631 | 0.7449018  | 1.33419757 | 1.1316576 |
| A_51_P1388 | 5342.9   | Detected | 5398.3   | Detected | 4450.2   | Detected | 4691     | Detected   | Tmem68   | 0.87798761  | 0.83291845 | 0.86897727 | 0.8243706 |
| A_55_P2004 | 55795.8  | Detected | 36687.6  | Detected | 53360.6  | Detected | 48985.6  | Detected   | Gnai2    | 0.877944218 | 0.95635514 | 1.33520863 | 1.4544587 |
| A_51_P2052 | 652      | Detected | 558.3    | Detected | 550.7    | Detected | 572.3    | Detected   | Tmem161b | 0.877760736 | 0.8446319  | 1.02507612 | 0.9863872 |
| A_55_P2151 | 64057.1  | Detected | 59247.4  | Detected | 73859.3  | Detected | 56224.9  | Detected   | Cox7a2l  | 0.877730962 | 1.15302285 | 0.9489851  | 1.2466252 |
| A_51_P2896 | 32.7     | Detected | 88.2     | Detected | 31       | Detected | 28.7     | Not Detect | Npm2     | 0.877675841 | 0.94801223 | 0.32539683 | 0.3514739 |
| A_55_P2049 | 389.9    | Detected | 329.2    | Detected | 365      | Detected | 342.2    | Detected   | Zfp160   | 0.877660939 | 0.93613747 | 1.03948967 | 1.1087485 |
| A_51_P4812 | 3596.5   | Detected | 3264.3   | Detected | 2728.5   | Detected | 3156.1   | Detected   | Ofd1     | 0.877547616 | 0.75865425 | 0.96685354 | 0.8358607 |
| A_55_P1954 | 254.3    | Detected | 255.8    | Detected | 205.7    | Detected | 223.1    | Detected   | Gm7967   | 0.877310263 | 0.80888714 | 0.87216575 | 0.8041439 |
| A_66_P1222 | 113.2    | Detected | 89.3     | Detected | 91.4     | Detected | 99.3     | Detected   | Kcnd3    | 0.877208481 | 0.80742049 | 1.11198208 | 1.0235162 |
| A_51_P4353 | 2467     | Detected | 1875.5   | Detected | 1323.5   | Detected | 2164     | Detected   | Ap1s2    | 0.87717876  | 0.53648156 | 1.15382565 | 0.7056785 |
| A_52_P6799 | 14626.3  | Detected | 14243.9  | Detected | 14416.7  | Detected | 12827.6  | Detected   | Eif4a3   | 0.877022897 | 0.98566965 | 0.90056796 | 1.0121315 |
| A_51_P4183 | 1411.4   | Detected | 1301.3   | Detected | 1112.6   | Detected | 1237.8   | Detected   | Mis12    | 0.877001559 | 0.78829531 | 0.95120264 | 0.8549912 |

|            |         |            |         |            |         |            |         |            |               |             |            |            |           |
|------------|---------|------------|---------|------------|---------|------------|---------|------------|---------------|-------------|------------|------------|-----------|
| A_55_P1971 | 73679   | Detected   | 75664   | Detected   | 88379.1 | Detected   | 64616.2 | Detected   | Snrpd1        | 0.876996159 | 1.19951547 | 0.85398869 | 1.1680469 |
| A_66_P1028 | 556     | Detected   | 345.5   | Detected   | 402.6   | Detected   | 487.6   | Detected   | Lrrc8a        | 0.876978417 | 0.72410072 | 1.41128799 | 1.1652677 |
| A_55_P2183 | 1075.4  | Detected   | 619.5   | Detected   | 1036.1  | Detected   | 943.1   | Detected   | Gm7120        | 0.876976009 | 0.96345546 | 1.52235674 | 1.6724778 |
| A_51_P5210 | 31.7    | Detected   | 42.8    | Detected   | 30.2    | Detected   | 27.8    | Not Detect | Ly6k          | 0.876971609 | 0.95268139 | 0.64953271 | 0.7056075 |
| A_55_P2072 | 38.2    | Detected   | 35.7    | Detected   | 44.6    | Detected   | 33.5    | Not Detect | Vpreb2        | 0.876963351 | 1.16753927 | 0.93837535 | 1.2492997 |
| A_52_P4725 | 5885.1  | Detected   | 7328.2  | Detected   | 5776.8  | Detected   | 5160    | Detected   | Gmps          | 0.876790539 | 0.98159759 | 0.70412925 | 0.7882973 |
| A_55_P2176 | 1589.3  | Detected   | 2294.9  | Detected   | 2570.8  | Detected   | 1393.4  | Detected   | Pdxk          | 0.876738187 | 1.61756748 | 0.60717243 | 1.1202231 |
| A_55_P2135 | 65.7    | Detected   | 43.8    | Detected   | 41.1    | Detected   | 57.6    | Detected   | Ptrhd1        | 0.876712329 | 0.62557078 | 1.31506849 | 0.9383562 |
| A_55_P2092 | 10211.1 | Detected   | 10702.8 | Detected   | 6950.1  | Detected   | 8951.5  | Detected   | Traf3         | 0.876644044 | 0.68064165 | 0.83636992 | 0.6493721 |
| A_52_P1621 | 3010.8  | Detected   | 2671.7  | Detected   | 2493.9  | Detected   | 2639.3  | Detected   | Snx12         | 0.876610868 | 0.82831806 | 0.98787289 | 0.9334506 |
| A_65_P2024 | 16.2    | Detected   | 6.6     | Not Detect | 16.9    | Not Detect | 14.2    | Not Detect | Prkcb         | 0.87654321  | 1.04320988 | 2.15151515 | 2.5606061 |
| A_55_P2032 | 831.3   | Detected   | 632.3   | Detected   | 1030.1  | Detected   | 728.6   | Detected   | Pde3b         | 0.876458559 | 1.23914351 | 1.15230112 | 1.6291317 |
| A_55_P2004 | 62.3    | Detected   | 41.2    | Detected   | 62.4    | Detected   | 54.6    | Detected   | Defa-rs2      | 0.876404494 | 1.00160514 | 1.32524272 | 1.5145631 |
| A_55_P2150 | 12812.7 | Detected   | 11120.3 | Detected   | 13554.9 | Detected   | 11228.1 | Detected   | E030030I06Rik | 0.876325833 | 1.0579269  | 1.00969398 | 1.2189329 |
| A_55_P1980 | 6066    | Detected   | 4022    | Detected   | 4703.7  | Detected   | 5315.7  | Detected   | Trmt2b        | 0.876310584 | 0.77542038 | 1.32165589 | 1.1694928 |
| A_52_P1717 | 7395.1  | Detected   | 6877.3  | Detected   | 9688.4  | Detected   | 6480.1  | Detected   | 2310009B15Rik | 0.876269422 | 1.31011075 | 0.94224478 | 1.4087505 |
| A_55_P2167 | 20.2    | Detected   | 15.5    | Not Detect | 13.9    | Not Detect | 17.7    | Not Detect | Gjd3          | 0.876237624 | 0.68811881 | 1.14193548 | 0.8967742 |
| A_52_P2564 | 1002.8  | Detected   | 974.6   | Detected   | 1207.3  | Detected   | 878.6   | Detected   | Gm9182        | 0.876146789 | 1.203929   | 0.90149805 | 1.2387646 |
| A_55_P2030 | 21.8    | Detected   | 21.2    | Detected   | 19.3    | Detected   | 19.1    | Not Detect | Barx2         | 0.876146789 | 0.8853211  | 0.9009434  | 0.9103774 |
| A_55_P1955 | 1627.5  | Detected   | 1814.9  | Detected   | 1464    | Detected   | 1425.9  | Detected   | BC016423      | 0.876129032 | 0.89953917 | 0.78566312 | 0.806656  |
| A_55_P2149 | 9155.4  | Detected   | 5963.3  | Detected   | 8285.1  | Detected   | 8021.3  | Detected   | Ehmt1         | 0.87612775  | 0.90494135 | 1.34511093 | 1.3893482 |
| A_55_P1990 | 11.3    | Not Detect | 17.8    | Detected   | 18.5    | Detected   | 9.9     | Not Detect | Ptprc         | 0.876106195 | 1.63716814 | 0.55617978 | 1.0393258 |
| A_51_P2596 | 11.3    | Not Detect | 33.4    | Detected   | 31.9    | Detected   | 9.9     | Not Detect | Pinlyp        | 0.876106195 | 2.82300885 | 0.29640719 | 0.9550898 |
| A_65_P1471 | 350.3   | Detected   | 327.3   | Detected   | 430.4   | Detected   | 306.9   | Detected   | Zfp850        | 0.876106195 | 1.22866115 | 0.93767186 | 1.3150015 |
| A_55_P2132 | 428.5   | Detected   | 172.5   | Detected   | 661.8   | Detected   | 375.4   | Detected   | Cacna1g       | 0.876079347 | 1.54445741 | 2.17623188 | 3.8365217 |
| A_66_P1002 | 6087.5  | Detected   | 7202.8  | Detected   | 5249.8  | Detected   | 5332.7  | Detected   | Snhg12        | 0.876008214 | 0.86239014 | 0.74036486 | 0.7288554 |
| A_55_P2140 | 25      | Detected   | 26.7    | Detected   | 25.8    | Detected   | 21.9    | Not Detect | Vmn1r124      | 0.876       | 1.032      | 0.82022472 | 0.9662921 |
| A_55_P1981 | 50.8    | Detected   | 48.8    | Detected   | 40.3    | Detected   | 44.5    | Not Detect | Scg5          | 0.875984252 | 0.79330709 | 0.91188525 | 0.8258197 |
| A_55_P1963 | 12.9    | Not Detect | 1315.3  | Detected   | 12.4    | Not Detect | 11.3    | Not Detect | Mef2b         | 0.875968992 | 0.96124031 | 0.0085912  | 0.0094275 |
| A_65_P0484 | 97.4    | Detected   | 33.9    | Detected   | 38.4    | Detected   | 85.3    | Detected   | Vgll3         | 0.875770021 | 0.39425051 | 2.51622419 | 1.1327434 |
| A_51_P4219 | 15101.6 | Detected   | 15465.5 | Detected   | 13775.5 | Detected   | 13224.7 | Detected   | Timm22        | 0.875715156 | 0.91218811 | 0.85510976 | 0.8907245 |
| A_52_P4006 | 128.7   | Detected   | 143.6   | Detected   | 179.9   | Detected   | 112.7   | Detected   | D630032N06Rik | 0.875679876 | 1.3978244  | 0.78481894 | 1.2527855 |
| A_55_P2051 | 19.3    | Detected   | 36.8    | Detected   | 23.8    | Detected   | 16.9    | Not Detect | Ccdc171       | 0.875647668 | 1.23316062 | 0.45923913 | 0.6467391 |
| A_52_P6067 | 5224.2  | Detected   | 3382.7  | Detected   | 4363.5  | Detected   | 4574    | Detected   | Stk4          | 0.875540753 | 0.8352475  | 1.3521743  | 1.2899459 |
| A_55_P2057 | 25.7    | Detected   | 28.9    | Detected   | 34      | Detected   | 22.5    | Not Detect | Mptx1         | 0.875486381 | 1.3229572  | 0.77854671 | 1.1764706 |
| A_55_P2075 | 1799.3  | Detected   | 1298.6  | Detected   | 1687.9  | Detected   | 1575.2  | Detected   | Epc2          | 0.875451564 | 0.93808703 | 1.21299861 | 1.2997844 |
| A_55_P1969 | 17865.9 | Detected   | 16877.2 | Detected   | 16499.2 | Detected   | 15640.4 | Detected   | Sumo2         | 0.875433088 | 0.92350231 | 0.9267177  | 0.9776029 |
| A_55_P2056 | 1268    | Detected   | 1628.4  | Detected   | 1052.5  | Detected   | 1110    | Detected   | Sf3b4         | 0.875394322 | 0.83004732 | 0.6816507  | 0.64634   |
| A_51_P1313 | 36.9    | Detected   | 31.9    | Detected   | 36.3    | Detected   | 32.3    | Not Detect | Selplg        | 0.875338753 | 0.98373984 | 1.01253918 | 1.137931  |
| A_55_P2040 | 372.1   | Detected   | 326.4   | Detected   | 312.4   | Detected   | 325.7   | Detected   | Btbd9         | 0.875302338 | 0.83955926 | 0.99785539 | 0.9571078 |

|            |                   |                  |                  |                   |               |             |            |            |           |
|------------|-------------------|------------------|------------------|-------------------|---------------|-------------|------------|------------|-----------|
| A_52_P5028 | 50.5 Detected     | 39.9 Detected    | 48.3 Detected    | 44.2 Not Detect   | Mgat5         | 0.875247525 | 0.95643564 | 1.10776942 | 1.2105263 |
| A_52_P2235 | 197.1 Detected    | 149.8 Detected   | 151.6 Detected   | 172.5 Detected    | 6720401G13Rik | 0.875190259 | 0.76915271 | 1.15153538 | 1.012016  |
| A_55_P2010 | 37090.4 Detected  | 27277.4 Detected | 27135.5 Detected | 32460.2 Detected  | Map7d1        | 0.875164463 | 0.7316044  | 1.19000345 | 0.9947979 |
| A_55_P2189 | 2022.4 Detected   | 1437.5 Detected  | 1628.5 Detected  | 1769.9 Detected   | 5830426C09Rik | 0.875148339 | 0.80523141 | 1.23123478 | 1.1328696 |
| A_55_P2311 | 22.4 Detected     | 29.9 Detected    | 12.5 Not Detect  | 19.6 Not Detect   | 3110023J12Rik | 0.875       | 0.55803571 | 0.65551839 | 0.4180602 |
| A_66_P1174 | 31.2 Detected     | 23.2 Detected    | 23.8 Detected    | 27.3 Not Detect   | Dlk1          | 0.875       | 0.76282051 | 1.17672414 | 1.0258621 |
| A_55_P2050 | 1508.2 Detected   | 1171.3 Detected  | 1269.4 Detected  | 1319.6 Detected   | Ikbkg         | 0.874950272 | 0.84166556 | 1.12661146 | 1.0837531 |
| A_51_P1815 | 11366.9 Detected  | 9852.3 Detected  | 9556.7 Detected  | 9944.1 Detected   | Tmem214       | 0.874829549 | 0.84074814 | 1.00931762 | 0.9699969 |
| A_55_P2051 | 8012.2 Detected   | 5298.4 Detected  | 8588.2 Detected  | 7009.1 Detected   | Tnfrsf1a      | 0.874803425 | 1.07189037 | 1.32287106 | 1.6209044 |
| A_51_P3688 | 22948 Detected    | 18675.5 Detected | 26837.4 Detected | 20074.8 Detected  | H2-Ke2        | 0.874795189 | 1.16948754 | 1.07492704 | 1.4370378 |
| A_51_P3413 | 4929.1 Detected   | 4199.8 Detected  | 3904.5 Detected  | 4311.8 Detected   | Mtap          | 0.874764156 | 0.79213244 | 1.02666794 | 0.9296871 |
| A_52_P1161 | 13880.5 Detected  | 12534.9 Detected | 16554.4 Detected | 12142.1 Detected  | Aldh2         | 0.874759555 | 1.19263715 | 0.96866349 | 1.3206647 |
| A_55_P1982 | 27306.8 Detected  | 25207.9 Detected | 27414.1 Detected | 23886.7 Detected  | Naa10         | 0.874752809 | 1.00392942 | 0.94758786 | 1.0875202 |
| A_51_P3366 | 25181.1 Detected  | 21978.8 Detected | 23356.6 Detected | 22026.7 Detected  | Srsf9         | 0.874731445 | 0.92754486 | 1.00217937 | 1.0626877 |
| A_66_P1160 | 1623.5 Detected   | 1782.7 Detected  | 1901.4 Detected  | 1420 Detected     | Ptpn2         | 0.874653526 | 1.17117339 | 0.79654457 | 1.0665844 |
| A_55_P2068 | 133073.3 Detected | 128444 Detected  | 144825 Detected  | 116387.7 Detected | Gm7634        | 0.874613465 | 1.08830998 | 0.90613575 | 1.1275342 |
| A_55_P2125 | 8391 Detected     | 4395.8 Detected  | 7697.9 Detected  | 7338.7 Detected   | Lrrc58        | 0.874591825 | 0.91739959 | 1.66947996 | 1.7511943 |
| A_55_P2019 | 27.1 Detected     | 30.3 Detected    | 27.8 Detected    | 23.7 Not Detect   | Deptor        | 0.874538745 | 1.02583026 | 0.78217822 | 0.9174917 |
| A_51_P4617 | 2747.8 Detected   | 2062 Detected    | 2849.2 Detected  | 2403 Detected     | Zcchc8        | 0.874517796 | 1.03690225 | 1.16537342 | 1.3817653 |
| A_55_P2189 | 231.9 Detected    | 196.9 Detected   | 299.8 Detected   | 202.8 Detected    | Vwa5b2        | 0.874514877 | 1.29279862 | 1.02996445 | 1.5226003 |
| A_55_P1979 | 79782.1 Detected  | 65542.1 Detected | 71629 Detected   | 69768.5 Detected  | Atp6v0c       | 0.874488137 | 0.8978079  | 1.06448374 | 1.0928701 |
| A_55_P2141 | 8068.5 Detected   | 8656.2 Detected  | 8409.6 Detected  | 7055.6 Detected   | Rnf149        | 0.874462416 | 1.04227552 | 0.81509207 | 0.9715117 |
| A_55_P2022 | 12418.4 Detected  | 9957.9 Detected  | 9945.4 Detected  | 10859 Detected    | Stim1         | 0.874428268 | 0.80086001 | 1.09049097 | 0.9987447 |
| A_55_P2149 | 4801 Detected     | 3943 Detected    | 3858.6 Detected  | 4198 Detected     | Tapbp         | 0.874401166 | 0.80370756 | 1.06467157 | 0.978595  |
| A_55_P2373 | 359.8 Detected    | 152.2 Detected   | 307.5 Detected   | 314.6 Detected    | Dcaf17        | 0.874374653 | 0.85464147 | 2.06701708 | 2.0203679 |
| A_55_P2014 | 5166.7 Detected   | 4443.8 Detected  | 4663.4 Detected  | 4517.6 Detected   | Amd2          | 0.874368552 | 0.90258773 | 1.01660741 | 1.0494172 |
| A_52_P1714 | 3621 Detected     | 3683.9 Detected  | 3108.7 Detected  | 3166 Detected     | Bmpr1a        | 0.874344104 | 0.85851975 | 0.85941529 | 0.8438611 |
| A_52_P3397 | 10994.1 Detected  | 9948.6 Detected  | 11652.3 Detected | 9611.8 Detected   | Csnk1a1       | 0.874268926 | 1.05986847 | 0.96614599 | 1.1712502 |
| A_55_P2168 | 27836.2 Detected  | 27278.4 Detected | 28359.4 Detected | 24335.7 Detected  | Sf1           | 0.874246485 | 1.01879567 | 0.89212344 | 1.0396284 |
| A_55_P2081 | 13235.3 Detected  | 11600.8 Detected | 11067.3 Detected | 11570.9 Detected  | Phf23         | 0.874245389 | 0.83619563 | 0.99742259 | 0.9540118 |
| A_51_P2838 | 9269.4 Detected   | 7191.5 Detected  | 9208.3 Detected  | 8103.3 Detected   | Bphl          | 0.874198977 | 0.99340842 | 1.12678857 | 1.2804422 |
| A_55_P2214 | 146.9 Detected    | 99.7 Detected    | 78.8 Detected    | 128.4 Detected    | E330013P08Rik | 0.874063989 | 0.53641933 | 1.28786359 | 0.7903711 |
| A_55_P2136 | 113.5 Detected    | 111.5 Detected   | 87.1 Detected    | 99.2 Detected     | Sbf1          | 0.874008811 | 0.76740088 | 0.8896861  | 0.7811659 |
| A_55_P2169 | 52264.4 Detected  | 43223.6 Detected | 40378.6 Detected | 45674.9 Detected  | Gcn1l1        | 0.873919915 | 0.77258325 | 1.05671207 | 0.9341795 |
| A_55_P1995 | 9389.8 Detected   | 7350.2 Detected  | 6359.4 Detected  | 8205.6 Detected   | Plekhh2       | 0.873884428 | 0.67726682 | 1.11637779 | 0.8652009 |
| A_55_P1954 | 6859.5 Detected   | 6758.7 Detected  | 2954.8 Detected  | 5993.5 Detected   | Scarb1        | 0.873751731 | 0.43076026 | 0.88678296 | 0.4371847 |
| A_55_P1953 | 369.5 Detected    | 366.1 Detected   | 352.4 Detected   | 322.8 Detected    | Brd2          | 0.873612991 | 0.95372124 | 0.8817263  | 0.9625785 |
| A_51_P1298 | 47823.6 Detected  | 50669.6 Detected | 49189.7 Detected | 41775.4 Detected  | Cacybp        | 0.87353106  | 1.02856539 | 0.82446674 | 0.9707931 |
| A_55_P2168 | 784.2 Detected    | 420.1 Detected   | 864.7 Detected   | 685 Detected      | Gramd4        | 0.873501658 | 1.10265238 | 1.63056415 | 2.0583194 |
| A_55_P2134 | 2322.6 Detected   | 2377 Detected    | 2029.3 Detected  | 2028.7 Detected   | Papola        | 0.873460777 | 0.87371911 | 0.85347076 | 0.8537232 |

|            |          |          |          |          |          |          |          |            |               |             |            |            |           |
|------------|----------|----------|----------|----------|----------|----------|----------|------------|---------------|-------------|------------|------------|-----------|
| A_66_P1332 | 411.5    | Detected | 645.3    | Detected | 333.4    | Detected | 359.4    | Detected   | Vcl           | 0.873390036 | 0.81020656 | 0.55695026 | 0.5166589 |
| A_55_P1999 | 14283.4  | Detected | 11280.3  | Detected | 12413.6  | Detected | 12474.9  | Detected   | Gm15455       | 0.873384488 | 0.86909279 | 1.10590144 | 1.1004672 |
| A_51_P3415 | 9944.3   | Detected | 9984.2   | Detected | 8901.6   | Detected | 8684.3   | Detected   | Klhdc2        | 0.873294249 | 0.89514596 | 0.86980429 | 0.8915687 |
| A_55_P1980 | 67024.8  | Detected | 63922.5  | Detected | 73486.5  | Detected | 58527.1  | Detected   | Rsl1d1        | 0.873215586 | 1.0964076  | 0.91559467 | 1.1496187 |
| A_51_P1709 | 62211.8  | Detected | 45562.7  | Detected | 55990.7  | Detected | 54323.9  | Detected   | Hnrnpm        | 0.873208941 | 0.90000129 | 1.19228887 | 1.2288714 |
| A_51_P4342 | 29784.3  | Detected | 35323.2  | Detected | 50331.5  | Detected | 26007.9  | Detected   | Mrpl11        | 0.873208368 | 1.68986681 | 0.7362838  | 1.4248851 |
| A_55_P2145 | 410.7    | Detected | 394.2    | Detected | 283.6    | Detected | 358.6    | Detected   | Cep68         | 0.873143414 | 0.69052837 | 0.90969051 | 0.7194318 |
| A_55_P2084 | 117.4    | Detected | 63.9     | Detected | 109.9    | Detected | 102.5    | Detected   | Trim65        | 0.873083475 | 0.93611584 | 1.60406886 | 1.7198748 |
| A_55_P2082 | 816      | Detected | 603.2    | Detected | 607.3    | Detected | 712.4    | Detected   | Ppt1          | 0.873039216 | 0.7442402  | 1.18103448 | 1.0067971 |
| A_55_P2005 | 7912.2   | Detected | 5723.6   | Detected | 7533.1   | Detected | 6907.5   | Detected   | Manbal        | 0.873018882 | 0.95208665 | 1.20684534 | 1.3161472 |
| A_52_P2388 | 3415     | Detected | 3545.7   | Detected | 4071.6   | Detected | 2981.2   | Detected   | Ppt2          | 0.872972182 | 1.1922694  | 0.84079307 | 1.1483205 |
| A_55_P2076 | 532.8    | Detected | 428.5    | Detected | 467.4    | Detected | 465.1    | Detected   | Synpo         | 0.872935435 | 0.87725225 | 1.08541424 | 1.0907818 |
| A_55_P2071 | 173.1    | Detected | 163.9    | Detected | 194.4    | Detected | 151.1    | Detected   | Cyb561d1      | 0.872905835 | 1.12305026 | 0.9219036  | 1.1860891 |
| A_51_P3767 | 23.6     | Detected | 25.3     | Detected | 20.1     | Detected | 20.6     | Not Detect | 4933402J07Rik | 0.872881356 | 0.85169492 | 0.81422925 | 0.7944664 |
| A_55_P2116 | 247228.8 | Detected | 227511.8 | Detected | 228686.4 | Detected | 215800.9 | Detected   | Tuba1b        | 0.872879292 | 0.92499903 | 0.94852619 | 1.0051628 |
| A_55_P2114 | 2368.5   | Detected | 2179.6   | Detected | 1839.4   | Detected | 2067.3   | Detected   | Arntl2        | 0.872830906 | 0.77660967 | 0.94847678 | 0.8439163 |
| A_55_P2025 | 3530.2   | Detected | 2801.8   | Detected | 2568.9   | Detected | 3081.2   | Detected   | Ranbp9        | 0.872811739 | 0.72769248 | 1.09972161 | 0.9168749 |
| A_51_P1514 | 3144.1   | Detected | 1994.3   | Detected | 2902.6   | Detected | 2744.2   | Detected   | Ncbp2         | 0.872809389 | 0.92318947 | 1.37602166 | 1.455448  |
| A_51_P4903 | 7744     | Detected | 7154.2   | Detected | 10683    | Detected | 6757.2   | Detected   | 1110059E24Rik | 0.872572314 | 1.37951963 | 0.94450812 | 1.4932487 |
| A_55_P2097 | 143.4    | Detected | 173.5    | Detected | 88.4     | Detected | 125.1    | Detected   | Gm12603       | 0.872384937 | 0.61645746 | 0.72103746 | 0.5095101 |
| A_55_P2019 | 105      | Detected | 68.8     | Detected | 61.1     | Detected | 91.6     | Detected   | Grk6          | 0.872380952 | 0.58190476 | 1.33139535 | 0.8880814 |
| A_55_P2120 | 167185.6 | Detected | 157307.7 | Detected | 146103.9 | Detected | 145846.5 | Detected   | Skint7        | 0.872362811 | 0.87390242 | 0.92714152 | 0.9287778 |
| A_51_P3085 | 1893.5   | Detected | 2137.6   | Detected | 2213.9   | Detected | 1651.8   | Detected   | Ppif          | 0.872352786 | 1.16921046 | 0.77273578 | 1.0356942 |
| A_55_P2117 | 94       | Detected | 105.9    | Detected | 73.2     | Detected | 82       | Detected   | Rabggtb       | 0.872340426 | 0.7787234  | 0.77431539 | 0.6912181 |
| A_55_P1999 | 77.5     | Detected | 127.4    | Detected | 153.5    | Detected | 67.6     | Detected   | AU041133      | 0.872258065 | 1.98064516 | 0.53061224 | 1.2048666 |
| A_51_P4738 | 2073.7   | Detected | 2059.2   | Detected | 1680.5   | Detected | 1808.7   | Detected   | Il6st         | 0.872209095 | 0.81038723 | 0.87835082 | 0.8160936 |
| A_52_P3078 | 7938.6   | Detected | 6445.4   | Detected | 6962.5   | Detected | 6923.9   | Detected   | Pip4k2b       | 0.872181493 | 0.87704381 | 1.07423899 | 1.0802278 |
| A_51_P1388 | 2890     | Detected | 2155.7   | Detected | 2653.8   | Detected | 2520.6   | Detected   | Zgpat         | 0.872179931 | 0.9182699  | 1.16927216 | 1.2310618 |
| A_51_P2631 | 2050.6   | Detected | 1821.8   | Detected | 1779.3   | Detected | 1788.4   | Detected   | Actr1b        | 0.872134985 | 0.86769726 | 0.98166648 | 0.9766714 |
| A_55_P2097 | 24312.7  | Detected | 18448.9  | Detected | 16096.7  | Detected | 21203.7  | Detected   | Bptf          | 0.872124445 | 0.66206962 | 1.14932056 | 0.8725019 |
| A_66_P1058 | 1733.6   | Detected | 1378.7   | Detected | 1130.9   | Detected | 1511.9   | Detected   | Igf1r         | 0.872115828 | 0.65234195 | 1.09661275 | 0.8202655 |
| A_55_P2119 | 4970     | Detected | 4007.4   | Detected | 4744.9   | Detected | 4334     | Detected   | Cd2bp2        | 0.872032193 | 0.95470825 | 1.08149923 | 1.1840345 |
| A_55_P1967 | 4149.9   | Detected | 4970.1   | Detected | 4081.3   | Detected | 3618.7   | Detected   | Srfbp1        | 0.871996916 | 0.98346948 | 0.728094   | 0.8211706 |
| A_55_P2152 | 2104.7   | Detected | 1532.8   | Detected | 1794     | Detected | 1835.2   | Detected   | Mtr           | 0.871953247 | 0.85237801 | 1.19728601 | 1.1704071 |
| A_51_P4429 | 1852.6   | Detected | 1483.2   | Detected | 1275.2   | Detected | 1615.3   | Detected   | Casc5         | 0.871909748 | 0.68832991 | 1.08906419 | 0.8597627 |
| A_55_P2083 | 4679.4   | Detected | 3917.7   | Detected | 4190.5   | Detected | 4079.9   | Detected   | Haus7         | 0.871885284 | 0.89552079 | 1.04140184 | 1.0696327 |
| A_55_P2009 | 55.4     | Detected | 31.8     | Detected | 40.2     | Detected | 48.3     | Detected   | Agrn          | 0.871841155 | 0.72563177 | 1.51886792 | 1.2641509 |
| A_51_P2696 | 4339.6   | Detected | 4603.6   | Detected | 4124.3   | Detected | 3783.3   | Detected   | Pole2         | 0.871808462 | 0.95038713 | 0.82181336 | 0.8958858 |
| A_55_P1994 | 14128    | Detected | 11342.9  | Detected | 14600.6  | Detected | 12316    | Detected   | Wdr5          | 0.871744054 | 1.0334513  | 1.08578935 | 1.2872017 |
| A_52_P5465 | 5025.2   | Detected | 5040.3   | Detected | 3813     | Detected | 4380.3   | Detected   | Pelp1         | 0.871666799 | 0.75877577 | 0.86905541 | 0.7565026 |

|            |          |            |          |            |          |          |          |            |           |             |            |            |           |
|------------|----------|------------|----------|------------|----------|----------|----------|------------|-----------|-------------|------------|------------|-----------|
| A_52_P4366 | 4764.6   | Detected   | 3604.8   | Detected   | 6260.5   | Detected | 4152.8   | Detected   | Vegfb     | 0.871594677 | 1.3139613  | 1.15201953 | 1.7367122 |
| A_55_P2144 | 270.2    | Detected   | 276.8    | Detected   | 358      | Detected | 235.5    | Detected   | Suv420h1  | 0.87157661  | 1.32494449 | 0.8507948  | 1.2933526 |
| A_55_P1993 | 43.6     | Detected   | 77.7     | Detected   | 21.7     | Detected | 38       | Not Detect | Adora2b   | 0.871559633 | 0.49770642 | 0.48906049 | 0.2792793 |
| A_52_P8698 | 3994.9   | Detected   | 3546.2   | Detected   | 3978.2   | Detected | 3481.6   | Detected   | Thoc3     | 0.871511177 | 0.99581967 | 0.98178332 | 1.1218205 |
| A_55_P2065 | 1768.9   | Detected   | 1697.1   | Detected   | 1960.2   | Detected | 1541.5   | Detected   | Akap8l    | 0.871445531 | 1.10814631 | 0.90831418 | 1.1550292 |
| A_51_P2495 | 1244.5   | Detected   | 1171.9   | Detected   | 1288.3   | Detected | 1084.5   | Detected   | Rev1      | 0.871434311 | 1.03519486 | 0.92542026 | 1.0993259 |
| A_51_P1049 | 69013.6  | Detected   | 54134.8  | Detected   | 90959.5  | Detected | 60134.1  | Detected   | Trub2     | 0.871336954 | 1.31799384 | 1.1108215  | 1.6802408 |
| A_51_P1539 | 459.9    | Detected   | 278      | Detected   | 317.9    | Detected | 400.7    | Detected   | Zfp273    | 0.871276364 | 0.69123723 | 1.44136691 | 1.1435252 |
| A_55_P1953 | 189531.5 | Detected   | 173232.7 | Detected   | 166760.7 | Detected | 165127.6 | Detected   | Luc7l2    | 0.871240928 | 0.87985744 | 0.95321264 | 0.9626398 |
| A_66_P1231 | 4643     | Detected   | 4637.6   | Detected   | 5764     | Detected | 4044.5   | Detected   | Mapk1ip1l | 0.871096274 | 1.24143872 | 0.87211057 | 1.2428843 |
| A_55_P2054 | 99061.5  | Detected   | 99401.8  | Detected   | 92296.2  | Detected | 86291.8  | Detected   | Hspa4     | 0.87109321  | 0.93170606 | 0.86811104 | 0.9285164 |
| A_52_P2808 | 4182.4   | Detected   | 4281.4   | Detected   | 4780.3   | Detected | 3643.1   | Detected   | Wdr33     | 0.871054897 | 1.1429562  | 0.85091325 | 1.1165273 |
| A_55_P2046 | 676.8    | Detected   | 459.2    | Detected   | 732.8    | Detected | 589.5    | Detected   | Hes1      | 0.871010638 | 1.08274232 | 1.28375436 | 1.5958188 |
| A_55_P1989 | 55679.6  | Detected   | 38235    | Detected   | 59387.6  | Detected | 48484.5  | Detected   | Romo1     | 0.87077673  | 1.06659531 | 1.26806591 | 1.5532261 |
| A_55_P2035 | 11.6     | Not Detect | 7        | Not Detect | 18.2     | Detected | 10.1     | Not Detect | Ccdc12l   | 0.870689655 | 1.56896552 | 1.44285714 | 2.6       |
| A_55_P2019 | 4891.1   | Detected   | 4484.7   | Detected   | 5665.9   | Detected | 4258.6   | Detected   | Lancl1    | 0.870683486 | 1.15841017 | 0.94958414 | 1.2633844 |
| A_52_P1241 | 61.8     | Detected   | 19.3     | Detected   | 43.6     | Detected | 53.8     | Detected   | Zdhc8     | 0.870550162 | 0.70550162 | 2.78756477 | 2.2590674 |
| A_55_P2180 | 44.8     | Detected   | 41.2     | Detected   | 38.3     | Detected | 39       | Not Detect | Gsdma3    | 0.870535714 | 0.85491071 | 0.94660194 | 0.9296117 |
| A_51_P2351 | 47638.8  | Detected   | 46605.4  | Detected   | 42984.8  | Detected | 41465.1  | Detected   | Zc3h11a   | 0.870406056 | 0.90230652 | 0.88970591 | 0.9223137 |
| A_55_P2287 | 89.5     | Detected   | 81.7     | Detected   | 117.7    | Detected | 77.9     | Detected   | Rragd     | 0.870391061 | 1.3150838  | 0.95348837 | 1.4406365 |
| A_55_P2123 | 68.6     | Detected   | 56.7     | Detected   | 94.7     | Detected | 59.7     | Detected   | Prr5l     | 0.870262391 | 1.38046647 | 1.05291005 | 1.670194  |
| A_55_P1957 | 13.1     | Not Detect | 23.9     | Detected   | 20.4     | Detected | 11.4     | Not Detect | She       | 0.870229008 | 1.55725191 | 0.47698745 | 0.8535565 |
| A_55_P2056 | 47842.9  | Detected   | 43650.2  | Detected   | 45926.7  | Detected | 41631.9  | Detected   | Anxa3     | 0.870179274 | 0.95994808 | 0.95376195 | 1.0521533 |
| A_51_P1851 | 9050.8   | Detected   | 6352.2   | Detected   | 9483     | Detected | 7875.6   | Detected   | Gpr108    | 0.870155124 | 1.04775268 | 1.23982242 | 1.4928686 |
| A_51_P2967 | 3176.2   | Detected   | 3072     | Detected   | 3080.8   | Detected | 2763.7   | Detected   | Nt5dc2    | 0.870127826 | 0.96996411 | 0.89964193 | 1.0028646 |
| A_55_P1990 | 25712.2  | Detected   | 24495.1  | Detected   | 22723.5  | Detected | 22370.1  | Detected   | Ddx5      | 0.870018902 | 0.88376335 | 0.91324796 | 0.9276753 |
| A_51_P3037 | 6324.9   | Detected   | 5168.5   | Detected   | 6182     | Detected | 5502.2   | Detected   | Depdc1b   | 0.869926797 | 0.97740676 | 1.06456419 | 1.1960917 |
| A_55_P2230 | 161.3    | Detected   | 99.4     | Detected   | 95.5     | Detected | 140.3    | Detected   | Ece1      | 0.869807812 | 0.59206448 | 1.41146881 | 0.9607646 |
| A_52_P4090 | 6578.1   | Detected   | 5118     | Detected   | 6685.3   | Detected | 5721     | Detected   | Dcaf8     | 0.869704018 | 1.0162965  | 1.11781946 | 1.3062329 |
| A_55_P2148 | 124.3    | Detected   | 99.3     | Detected   | 74.9     | Detected | 108.1    | Detected   | Paqr6     | 0.869670153 | 0.60257442 | 1.08862034 | 0.75428   |
| A_51_P1943 | 9217.6   | Detected   | 5687.4   | Detected   | 7484.8   | Detected | 8016.1   | Detected   | Pcbp4     | 0.869651536 | 0.8120118  | 1.40944896 | 1.3160319 |
| A_52_P6029 | 451.6    | Detected   | 373.7    | Detected   | 453.6    | Detected | 392.7    | Detected   | Cdip1     | 0.869574845 | 1.0044287  | 1.05084292 | 1.2138079 |
| A_52_P1931 | 676.2    | Detected   | 588.4    | Detected   | 851.4    | Detected | 588      | Detected   | Slc35d2   | 0.869565217 | 1.25909494 | 0.99932019 | 1.4469748 |
| A_55_P2050 | 42.9     | Detected   | 29.6     | Detected   | 47.1     | Detected | 37.3     | Not Detect | P2rx3     | 0.869463869 | 1.0979021  | 1.26013514 | 1.5912162 |
| A_51_P4193 | 1131.8   | Detected   | 1094.8   | Detected   | 878.5    | Detected | 984      | Detected   | Bmpr2     | 0.869411557 | 0.77619721 | 0.8987943  | 0.8024297 |
| A_55_P2106 | 54451.4  | Detected   | 43919.5  | Detected   | 50278.3  | Detected | 47339.2  | Detected   | Knstrn    | 0.869384442 | 0.92336102 | 1.07786291 | 1.1447831 |
| A_55_P2158 | 11393.1  | Detected   | 11109.7  | Detected   | 11455.3  | Detected | 9904.4   | Detected   | Ddx31     | 0.869333193 | 1.00545944 | 0.89150922 | 1.031108  |
| A_52_P4267 | 30.6     | Detected   | 75.2     | Detected   | 156.9    | Detected | 26.6     | Not Detect | Cited4    | 0.869281046 | 5.12745098 | 0.3537234  | 2.0864362 |
| A_55_P2097 | 607.4    | Detected   | 555.6    | Detected   | 568.6    | Detected | 528      | Detected   | Patz1     | 0.869278894 | 0.93612117 | 0.95032397 | 1.0233981 |
| A_51_P3021 | 3463.6   | Detected   | 1895.1   | Detected   | 2948.6   | Detected | 3010.6   | Detected   | Mastl     | 0.869211225 | 0.85131077 | 1.58862329 | 1.5559073 |

|            |          |            |          |            |          |            |          |            |               |             |            |            |           |
|------------|----------|------------|----------|------------|----------|------------|----------|------------|---------------|-------------|------------|------------|-----------|
| A_55_P1978 | 62093.9  | Detected   | 61352.4  | Detected   | 68149.2  | Detected   | 53964.5  | Detected   | Mrps7         | 0.869078927 | 1.09751844 | 0.87958254 | 1.110783  |
| A_55_P1972 | 2709     | Detected   | 3033.6   | Detected   | 1899.3   | Detected   | 2354.2   | Detected   | Pmm1          | 0.869029162 | 0.70110742 | 0.77604167 | 0.6260878 |
| A_55_P2179 | 25580.3  | Detected   | 22256.2  | Detected   | 26415.2  | Detected   | 22228.5  | Detected   | Vash1         | 0.86896948  | 1.0326384  | 0.9987554  | 1.1868693 |
| A_52_P7586 | 100.7    | Detected   | 95.4     | Detected   | 66.8     | Detected   | 87.5     | Detected   | Akap10        | 0.868917577 | 0.6633565  | 0.91719078 | 0.7002096 |
| A_55_P2071 | 38.9     | Detected   | 28.2     | Detected   | 26.5     | Detected   | 33.8     | Not Detect | Mrgprb1       | 0.868894602 | 0.68123393 | 1.19858156 | 0.9397163 |
| A_66_P1172 | 81.6     | Detected   | 61.8     | Detected   | 55.9     | Detected   | 70.9     | Detected   | A630012P03Rik | 0.868872549 | 0.68504902 | 1.14724919 | 0.9045307 |
| A_55_P2008 | 8405.3   | Detected   | 11509    | Detected   | 6437.1   | Detected   | 7302.9   | Detected   | Ktn1          | 0.868844658 | 0.76583822 | 0.63453819 | 0.5593101 |
| A_51_P1455 | 24419.2  | Detected   | 18322.3  | Detected   | 24656    | Detected   | 21216.4  | Detected   | Rnf14         | 0.868840912 | 1.00969729 | 1.15795506 | 1.3456826 |
| A_55_P1970 | 16079    | Detected   | 15607.4  | Detected   | 17575.6  | Detected   | 13969.8  | Detected   | Mrps10        | 0.868822688 | 1.09307793 | 0.89507541 | 1.1261068 |
| A_55_P2144 | 115.8    | Detected   | 86.6     | Detected   | 83.2     | Detected   | 100.6    | Detected   | Gm11123       | 0.868739206 | 0.71848014 | 1.16166282 | 0.960739  |
| A_51_P1699 | 18334.9  | Detected   | 18343.5  | Detected   | 13728.6  | Detected   | 15927.8  | Detected   | Noc2l         | 0.868714855 | 0.74876874 | 0.86830757 | 0.7484177 |
| A_51_P2402 | 147      | Detected   | 109.3    | Detected   | 168.3    | Detected   | 127.7    | Detected   | Fam199x       | 0.868707483 | 1.14489796 | 1.16834401 | 1.5397987 |
| A_65_P0977 | 565      | Detected   | 558.5    | Detected   | 491.9    | Detected   | 490.8    | Detected   | Thada         | 0.868672566 | 0.87061947 | 0.87878245 | 0.880752  |
| A_55_P1999 | 4116.4   | Detected   | 3291.7   | Detected   | 4114.1   | Detected   | 3575.7   | Detected   | Smad2         | 0.868647362 | 0.99944126 | 1.08627761 | 1.2498405 |
| A_52_P1019 | 9667.6   | Detected   | 7394.1   | Detected   | 8034.3   | Detected   | 8397.4   | Detected   | Tmem129       | 0.868612686 | 0.83105424 | 1.13568927 | 1.0865825 |
| A_55_P1967 | 216.8    | Detected   | 205.1    | Detected   | 203      | Detected   | 188.3    | Detected   | Trim39        | 0.868542435 | 0.93634686 | 0.91808874 | 0.9897611 |
| A_66_P1150 | 588.4    | Detected   | 593      | Detected   | 577.3    | Detected   | 511      | Detected   | Gpn1          | 0.868456832 | 0.98113528 | 0.86172007 | 0.9735245 |
| A_55_P1991 | 12016.3  | Detected   | 9354.8   | Detected   | 11501.8  | Detected   | 10435.5  | Detected   | Csrp2bp       | 0.868445362 | 0.95718316 | 1.11552358 | 1.2295078 |
| A_52_P2364 | 15.2     | Detected   | 20.2     | Detected   | 11.2     | Not Detect | 13.2     | Not Detect | Ngfr          | 0.868421053 | 0.73684211 | 0.65346535 | 0.5544554 |
| A_55_P2016 | 5447.9   | Detected   | 3518.4   | Detected   | 4728.6   | Detected   | 4730.9   | Detected   | Sdccag3       | 0.868389655 | 0.86796747 | 1.34461687 | 1.3439632 |
| A_55_P1977 | 259.8    | Detected   | 178.7    | Detected   | 279.9    | Detected   | 225.6    | Detected   | Zbtb9         | 0.868360277 | 1.07736721 | 1.26245104 | 1.5663123 |
| A_52_P5198 | 12631.9  | Detected   | 12038.6  | Detected   | 13644.1  | Detected   | 10967.6  | Detected   | Etf1          | 0.868246265 | 1.08013046 | 0.91103617 | 1.1333627 |
| A_55_P2140 | 6591.4   | Detected   | 6697.7   | Detected   | 6239.2   | Detected   | 5722.4   | Detected   | Smek2         | 0.868161544 | 0.94656674 | 0.85438285 | 0.9315437 |
| A_55_P2114 | 86.4     | Detected   | 64.8     | Detected   | 61.2     | Detected   | 75       | Detected   | Pnpla8        | 0.868055556 | 0.70833333 | 1.15740741 | 0.9444444 |
| A_55_P2141 | 34.1     | Detected   | 25.2     | Detected   | 41.4     | Detected   | 29.6     | Not Detect | Zfp874b       | 0.868035191 | 1.21407625 | 1.17460317 | 1.6428571 |
| A_51_P3449 | 21377.8  | Detected   | 21118.1  | Detected   | 28097.5  | Detected   | 18555.5  | Detected   | Rab1b         | 0.867979867 | 1.31433075 | 0.87865386 | 1.3304937 |
| A_55_P2010 | 398.3    | Detected   | 380.5    | Detected   | 209.9    | Detected   | 345.7    | Detected   | Jak3          | 0.86793874  | 0.52698971 | 0.90854139 | 0.5516426 |
| A_55_P2410 | 328.6    | Detected   | 297.7    | Detected   | 382      | Detected   | 285.2    | Detected   | 9130230N09Rik | 0.867924528 | 1.16250761 | 0.95801142 | 1.283171  |
| A_55_P2311 | 10.6     | Not Detect | 11.5     | Not Detect | 19.1     | Detected   | 9.2      | Not Detect | 2410012E07Rik | 0.867924528 | 1.80188679 | 0.8        | 1.6608696 |
| A_55_P2167 | 10.6     | Not Detect | 32.2     | Detected   | 3.3      | Not Detect | 9.2      | Not Detect | 4921504E06Rik | 0.867924528 | 0.31132075 | 0.28571429 | 0.1024845 |
| A_51_P2214 | 5073.5   | Detected   | 5666.3   | Detected   | 5103     | Detected   | 4403.2   | Detected   | Nsun5         | 0.867882133 | 1.00581453 | 0.77708558 | 0.9005877 |
| A_52_P2934 | 81.7     | Detected   | 12.7     | Not Detect | 76.8     | Detected   | 70.9     | Detected   | Tshz2         | 0.867809058 | 0.94002448 | 5.58267717 | 6.0472441 |
| A_55_P2048 | 12.1     | Not Detect | 18.8     | Detected   | 9.2      | Not Detect | 10.5     | Not Detect | Hbb-bh2       | 0.867768595 | 0.76033058 | 0.55851064 | 0.4893617 |
| A_52_P2892 | 5166.4   | Detected   | 3891.1   | Detected   | 4478.6   | Detected   | 4482.4   | Detected   | Notch2        | 0.86760607  | 0.86687055 | 1.15196217 | 1.1509856 |
| A_55_P1970 | 192.5    | Detected   | 149.9    | Detected   | 135.7    | Detected   | 167      | Detected   | Heatr5b       | 0.867532468 | 0.70493506 | 1.11407605 | 0.9052702 |
| A_55_P2254 | 282.3    | Detected   | 236.1    | Detected   | 314.1    | Detected   | 244.9    | Detected   | Ints2         | 0.867516826 | 1.11264612 | 1.03727234 | 1.3303685 |
| A_55_P2009 | 24146.8  | Detected   | 17756.9  | Detected   | 20738.7  | Detected   | 20947.7  | Detected   | Agrn          | 0.867514536 | 0.85885914 | 1.17969353 | 1.1679235 |
| A_55_P1994 | 135234.1 | Detected   | 128946.6 | Detected   | 120831.3 | Detected   | 117297.4 | Detected   | Itsn1         | 0.867365554 | 0.89349728 | 0.90965873 | 0.9370646 |
| A_55_P2073 | 6355     | Detected   | 3799.6   | Detected   | 7802.4   | Detected   | 5511     | Detected   | Trex1         | 0.867191188 | 1.22775767 | 1.45041583 | 2.0534793 |
| A_55_P2016 | 115.2    | Detected   | 112.9    | Detected   | 89.9     | Detected   | 99.9     | Detected   | Slc30a2       | 0.8671875   | 0.78038194 | 0.88485385 | 0.7962799 |

|            |          |          |          |          |          |          |          |            |          |             |            |            |           |
|------------|----------|----------|----------|----------|----------|----------|----------|------------|----------|-------------|------------|------------|-----------|
| A_55_P2121 | 3842.6   | Detected | 3017     | Detected | 3800     | Detected | 3332.1   | Detected   | Dgcr2    | 0.867147244 | 0.98891376 | 1.1044415  | 1.2595293 |
| A_55_P2162 | 74937.9  | Detected | 61357.3  | Detected | 78403.6  | Detected | 64979    | Detected   | Lman2    | 0.867104629 | 1.04624763 | 1.05902639 | 1.2778202 |
| A_52_P3782 | 565.6    | Detected | 441.7    | Detected | 467      | Detected | 490.4    | Detected   | Lca5     | 0.867043847 | 0.82567185 | 1.11025583 | 1.0572787 |
| A_51_P1254 | 2703.5   | Detected | 2668     | Detected | 2138.6   | Detected | 2343.5   | Detected   | Lzic     | 0.866839282 | 0.79104864 | 0.87837331 | 0.8015742 |
| A_52_P8589 | 1197.7   | Detected | 910.2    | Detected | 1160.7   | Detected | 1038.2   | Detected   | Cant1    | 0.866828087 | 0.96910746 | 1.14062843 | 1.2752142 |
| A_55_P2059 | 42.8     | Detected | 52.7     | Detected | 18.6     | Detected | 37.1     | Not Detect | Hnrnp3   | 0.866822243 | 0.43457944 | 0.70398482 | 0.3529412 |
| A_51_P5098 | 858.1    | Detected | 686.4    | Detected | 801.2    | Detected | 743.8    | Detected   | Fnbp4    | 0.866798741 | 0.93369071 | 1.08362471 | 1.1672494 |
| A_55_P2042 | 2465.1   | Detected | 1517.9   | Detected | 6175.5   | Detected | 2136.7   | Detected   | C1s      | 0.866780252 | 2.5051722  | 1.40766849 | 4.0684498 |
| A_55_P2018 | 34889.3  | Detected | 26237.1  | Detected | 34684.9  | Detected | 30241    | Detected   | Spns1    | 0.866770041 | 0.99414147 | 1.15260452 | 1.3219792 |
| A_55_P2150 | 7695.3   | Detected | 7858.5   | Detected | 6969     | Detected | 6670     | Detected   | Mul1     | 0.866762829 | 0.90561771 | 0.84876249 | 0.8868105 |
| A_55_P2067 | 1572.6   | Detected | 1245.5   | Detected | 1271.9   | Detected | 1363     | Detected   | Gm5136   | 0.866717538 | 0.80878799 | 1.09433962 | 1.0211963 |
| A_51_P4066 | 19674.8  | Detected | 16179.1  | Detected | 16293    | Detected | 17051.7  | Detected   | Rfc1     | 0.866677171 | 0.82811515 | 1.05393378 | 1.0070399 |
| A_55_P2002 | 2595.1   | Detected | 1369.4   | Detected | 4613.6   | Detected | 2248.9   | Detected   | Ephx1    | 0.866594736 | 1.77781203 | 1.64225208 | 3.3690667 |
| A_55_P1994 | 265.2    | Detected | 209.1    | Detected | 209.8    | Detected | 229.8    | Detected   | Tmem184a | 0.866515837 | 0.79110106 | 1.0989957  | 1.0033477 |
| A_55_P2117 | 109590.9 | Detected | 105983.3 | Detected | 97810.8  | Detected | 94957    | Detected   | Pak4     | 0.866467928 | 0.89250841 | 0.89596191 | 0.9228888 |
| A_55_P2063 | 55094.1  | Detected | 40000.5  | Detected | 55632.2  | Detected | 47730.4  | Detected   | Ube2l3   | 0.86634322  | 1.00976693 | 1.19324508 | 1.3907876 |
| A_51_P3733 | 83950.3  | Detected | 66474.6  | Detected | 85130.1  | Detected | 72727.4  | Detected   | Csnk2b   | 0.866314951 | 1.01405355 | 1.094063   | 1.280641  |
| A_55_P2102 | 74164.8  | Detected | 65363    | Detected | 71849.7  | Detected | 64243    | Detected   | Rpl36a   | 0.866219554 | 0.96878438 | 0.98286492 | 1.0992412 |
| A_55_P2026 | 20442.4  | Detected | 18139    | Detected | 19736.5  | Detected | 17705.1  | Detected   | Asnsd1   | 0.866096936 | 0.96546883 | 0.97607917 | 1.0880699 |
| A_55_P1986 | 4151.9   | Detected | 4920.7   | Detected | 3921.6   | Detected | 3595.9   | Detected   | Senp3    | 0.866085407 | 0.94453142 | 0.73077001 | 0.7969598 |
| A_52_P6188 | 589.9    | Detected | 648.4    | Detected | 605.4    | Detected | 510.8    | Detected   | Crk      | 0.865909476 | 1.02627564 | 0.78778532 | 0.9336829 |
| A_55_P1975 | 6104.7   | Detected | 5327     | Detected | 4129.9   | Detected | 5285.8   | Detected   | Dhx40    | 0.865857454 | 0.67651154 | 0.99226582 | 0.7752769 |
| A_55_P2037 | 1500.6   | Detected | 1254     | Detected | 1353.7   | Detected | 1299.3   | Detected   | Lrrc57   | 0.865853659 | 0.90210582 | 1.0361244  | 1.0795056 |
| A_55_P2016 | 2353.2   | Detected | 2602.1   | Detected | 2132.8   | Detected | 2037.5   | Detected   | Cdk1     | 0.865842257 | 0.9063403  | 0.78302141 | 0.8196457 |
| A_55_P2055 | 2965.8   | Detected | 2311.8   | Detected | 2567.9   | Detected | 2567.8   | Detected   | Abcf1    | 0.865803493 | 0.86583721 | 1.11073622 | 1.1107795 |
| A_51_P2327 | 2897.2   | Detected | 2180.2   | Detected | 2190.5   | Detected | 2508.3   | Detected   | Commdd9  | 0.865766947 | 0.75607483 | 1.15049078 | 1.0047243 |
| A_55_P2156 | 151529.8 | Detected | 136480   | Detected | 133172.1 | Detected | 131187.3 | Detected   | Sumo2    | 0.865752479 | 0.87885089 | 0.96121996 | 0.9757627 |
| A_52_P5777 | 1817.9   | Detected | 1264.7   | Detected | 1468.6   | Detected | 1573.7   | Detected   | Rnf169   | 0.865669179 | 0.80785522 | 1.24432672 | 1.161224  |
| A_55_P1972 | 363488   | Detected | 316755.5 | Detected | 360633.2 | Detected | 314629   | Detected   | Rps28    | 0.865582908 | 0.9921461  | 0.99328662 | 1.1385223 |
| A_51_P1047 | 15706.1  | Detected | 14010.6  | Detected | 18416.4  | Detected | 13594.4  | Detected   | Gtf2h4   | 0.865549054 | 1.17256353 | 0.97029392 | 1.3144619 |
| A_55_P2062 | 78308    | Detected | 64653.8  | Detected | 73555.8  | Detected | 67768    | Detected   | Dbndd2   | 0.865403279 | 0.93931399 | 1.04816732 | 1.1376872 |
| A_52_P1407 | 8101.6   | Detected | 5062.2   | Detected | 7259.2   | Detected | 7011     | Detected   | Hspa13   | 0.865384615 | 0.89602054 | 1.38497096 | 1.434001  |
| A_51_P1357 | 1646.1   | Detected | 890      | Detected | 1178.2   | Detected | 1424.4   | Detected   | Ccdc136  | 0.865318024 | 0.71575238 | 1.60044944 | 1.3238202 |
| A_55_P2027 | 349975.2 | Detected | 308940.8 | Detected | 347230.7 | Detected | 302839.7 | Detected   | Rps28    | 0.8653176   | 0.99215802 | 0.98025156 | 1.1239393 |
| A_55_P2025 | 3379.3   | Detected | 3000.5   | Detected | 2212.3   | Detected | 2924.1   | Detected   | Sms      | 0.865297547 | 0.65466221 | 0.97453758 | 0.7373104 |
| A_55_P1968 | 5985.6   | Detected | 4590.6   | Detected | 5532.5   | Detected | 5178.8   | Detected   | Telo2    | 0.865209837 | 0.92430166 | 1.1281314  | 1.2051802 |
| A_66_P1362 | 13577.4  | Detected | 11258.8  | Detected | 8747.9   | Detected | 11747.3  | Detected   | Rai14    | 0.865209834 | 0.64429861 | 1.04338828 | 0.7769833 |
| A_55_P1957 | 17020.6  | Detected | 17157.2  | Detected | 16315    | Detected | 14726.3  | Detected   | Timm10   | 0.865204517 | 0.95854435 | 0.85831604 | 0.9509127 |
| A_55_P2088 | 534.8    | Detected | 69.1     | Detected | 641.3    | Detected | 462.7    | Detected   | Fbln1    | 0.865183246 | 1.19913987 | 6.69609262 | 9.2807525 |
| A_52_P6326 | 743      | Detected | 580.4    | Detected | 744      | Detected | 642.8    | Detected   | Zfp395   | 0.865141319 | 1.0013459  | 1.10751206 | 1.2818746 |



|            |         |            |         |            |         |            |         |            |               |             |            |            |           |
|------------|---------|------------|---------|------------|---------|------------|---------|------------|---------------|-------------|------------|------------|-----------|
| A_55_P1984 | 13436.6 | Detected   | 13529.3 | Detected   | 14115   | Detected   | 11624.4 | Detected   | Ube2f         | 0.865129571 | 1.05048896 | 0.85920188 | 1.0432912 |
| A_52_P3926 | 14881.9 | Detected   | 11232.1 | Detected   | 11127.5 | Detected   | 12874.2 | Detected   | Acot9         | 0.865091151 | 0.74772039 | 1.14619706 | 0.9906874 |
| A_51_P1730 | 19782.6 | Detected   | 14836.7 | Detected   | 20480   | Detected   | 17113.1 | Detected   | Nsmce1        | 0.865058182 | 1.0352532  | 1.15343035 | 1.3803609 |
| A_51_P1415 | 7547.8  | Detected   | 6281.5  | Detected   | 8171.4  | Detected   | 6528.4  | Detected   | Sap130        | 0.864940777 | 1.0826201  | 1.0393059  | 1.3008676 |
| A_55_P2180 | 157.7   | Detected   | 79.5    | Detected   | 69      | Detected   | 136.4   | Detected   | Dmr1c2        | 0.864933418 | 0.43753963 | 1.71572327 | 0.8679245 |
| A_55_P1998 | 9030.1  | Detected   | 9079.3  | Detected   | 7448.1  | Detected   | 7810.1  | Detected   | Ppfbp1        | 0.864896291 | 0.82480814 | 0.86020949 | 0.8203386 |
| A_55_P2169 | 13926.9 | Detected   | 11855   | Detected   | 19345.4 | Detected   | 12044.7 | Detected   | Ndfip1        | 0.864851474 | 1.3890672  | 1.01600169 | 1.6318347 |
| A_52_P6466 | 418.7   | Detected   | 278.1   | Detected   | 419.9   | Detected   | 362.1   | Detected   | 9030624J02Rik | 0.86481968  | 1.00286601 | 1.30204962 | 1.5098885 |
| A_55_P2028 | 2570.9  | Detected   | 1565.4  | Detected   | 2822.9  | Detected   | 2223.3  | Detected   | Rhbdf2        | 0.86479443  | 1.09802015 | 1.42027597 | 1.8033091 |
| A_52_P1102 | 1690.7  | Detected   | 1561.8  | Detected   | 1302.7  | Detected   | 1462    | Detected   | Phf12         | 0.864730585 | 0.77050926 | 0.93609937 | 0.8341017 |
| A_55_P2131 | 24737.1 | Detected   | 22035.1 | Detected   | 25449.6 | Detected   | 21390.6 | Detected   | Vash1         | 0.864717368 | 1.02880289 | 0.97075121 | 1.1549573 |
| A_55_P1969 | 12790.6 | Detected   | 9928    | Detected   | 9528.5  | Detected   | 11059.8 | Detected   | Stim1         | 0.864681876 | 0.74496114 | 1.11400081 | 0.9597603 |
| A_55_P2202 | 22.9    | Detected   | 20.2    | Detected   | 11.1    | Not Detect | 19.8    | Not Detect | A930004J17Rik | 0.864628821 | 0.48471616 | 0.98019802 | 0.549505  |
| A_51_P3061 | 68.7    | Detected   | 53.4    | Detected   | 77.4    | Detected   | 59.4    | Detected   | Elmo1         | 0.864628821 | 1.12663755 | 1.11235955 | 1.4494382 |
| A_55_P2258 | 9.6     | Not Detect | 21.9    | Detected   | 3       | Not Detect | 8.3     | Not Detect | 1700042O10Rik | 0.864583333 | 0.3125     | 0.37899543 | 0.1369863 |
| A_52_P1746 | 1276.5  | Detected   | 1245.9  | Detected   | 1439.7  | Detected   | 1103.5  | Detected   | Gatc          | 0.864473169 | 1.12784959 | 0.88570511 | 1.1555502 |
| A_55_P1980 | 25.8    | Detected   | 20.7    | Detected   | 19.7    | Detected   | 22.3    | Not Detect | Grin3a        | 0.864341085 | 0.76356589 | 1.07729469 | 0.9516908 |
| A_65_P0944 | 32931   | Detected   | 25470   | Detected   | 34639.5 | Detected   | 28463.6 | Detected   | Psma4         | 0.864340591 | 1.05188121 | 1.11753435 | 1.3600118 |
| A_52_P3703 | 12014.6 | Detected   | 9325.1  | Detected   | 11620.5 | Detected   | 10384.2 | Detected   | Plbd2         | 0.864298437 | 0.96719824 | 1.11357519 | 1.2461529 |
| A_66_P1265 | 521.5   | Detected   | 345.3   | Detected   | 358.5   | Detected   | 450.7   | Detected   | Prr14l        | 0.864237776 | 0.68744008 | 1.30524182 | 1.0382276 |
| A_55_P2024 | 3708.8  | Detected   | 2512.6  | Detected   | 4413    | Detected   | 3204.7  | Detected   | Map4k3        | 0.864080026 | 1.18987274 | 1.27545172 | 1.756348  |
| A_55_P1996 | 1231.4  | Detected   | 1022.4  | Detected   | 1222.7  | Detected   | 1064    | Detected   | Rbm14         | 0.864057171 | 0.99293487 | 1.04068858 | 1.1959116 |
| A_66_P1260 | 1710.5  | Detected   | 1471.8  | Detected   | 1706.4  | Detected   | 1477.9  | Detected   | Rpl39         | 0.864016369 | 0.99760304 | 1.00414458 | 1.1593967 |
| A_55_P2083 | 654.4   | Detected   | 504.4   | Detected   | 1072.4  | Detected   | 565.4   | Detected   | E230025N22Rik | 0.863997555 | 1.63875306 | 1.12093577 | 2.1260904 |
| A_55_P2119 | 256.5   | Detected   | 224.5   | Detected   | 251.2   | Detected   | 221.6   | Detected   | 1700066M21Rik | 0.863937622 | 0.97933723 | 0.98708241 | 1.118931  |
| A_55_P2088 | 116.1   | Detected   | 104.3   | Detected   | 116.1   | Detected   | 100.3   | Detected   | Ap3s1         | 0.863910422 | 1          | 0.96164909 | 1.1131352 |
| A_55_P2087 | 2654.7  | Detected   | 1611.3  | Detected   | 1997.6  | Detected   | 2293.1  | Detected   | Ncoa2         | 0.863788752 | 0.75247674 | 1.4231366  | 1.2397443 |
| A_55_P2100 | 126.9   | Detected   | 108.9   | Detected   | 65.3    | Detected   | 109.6   | Detected   | Tcp11l1       | 0.863672183 | 0.51457841 | 1.00642792 | 0.5996327 |
| A_55_P2163 | 2228    | Detected   | 1623.3  | Detected   | 1147.6  | Detected   | 1924.2  | Detected   | Med14         | 0.863644524 | 0.51508079 | 1.18536315 | 0.706955  |
| A_52_P2738 | 22      | Detected   | 16.1    | Not Detect | 10.4    | Not Detect | 19      | Not Detect | Ifitm5        | 0.863636364 | 0.47272727 | 1.18012422 | 0.6459627 |
| A_51_P3994 | 19.8    | Detected   | 17.4    | Detected   | 8.6     | Not Detect | 17.1    | Not Detect | Catsperg2     | 0.863636364 | 0.43434343 | 0.98275862 | 0.4942529 |
| A_55_P2126 | 33      | Detected   | 31.3    | Detected   | 25.7    | Detected   | 28.5    | Not Detect | Iqck          | 0.863636364 | 0.77878788 | 0.91054313 | 0.8210863 |
| A_51_P1562 | 794.7   | Detected   | 635.3   | Detected   | 744.6   | Detected   | 686.3   | Detected   | Eps15         | 0.863596326 | 0.93695734 | 1.08027703 | 1.1720447 |
| A_51_P5168 | 1970.5  | Detected   | 1815.7  | Detected   | 2161.5  | Detected   | 1701.6  | Detected   | Rbbp5         | 0.863537173 | 1.09692971 | 0.93715922 | 1.19045   |
| A_65_P0965 | 3672.6  | Detected   | 3190.9  | Detected   | 3549    | Detected   | 3170.8  | Detected   | Zfp213        | 0.863366552 | 0.96634537 | 0.99370084 | 1.1122254 |
| A_51_P3859 | 888.5   | Detected   | 782.2   | Detected   | 933.7   | Detected   | 767     | Detected   | Man2a2        | 0.863252673 | 1.05087226 | 0.98056763 | 1.1936845 |
| A_55_P1994 | 2753.3  | Detected   | 2571.6  | Detected   | 2651.2  | Detected   | 2376.5  | Detected   | Sap30bp       | 0.863146043 | 0.96291723 | 0.92413284 | 1.0309535 |
| A_55_P1996 | 3183.3  | Detected   | 934.6   | Detected   | 325.3   | Detected   | 2747.3  | Detected   | Gm3142        | 0.863035215 | 0.10218955 | 2.93954633 | 0.3480633 |
| A_55_P1971 | 15607.9 | Detected   | 14644.2 | Detected   | 18995.8 | Detected   | 13470.1 | Detected   | Vcpkmt        | 0.863030901 | 1.21706315 | 0.91982491 | 1.2971552 |
| A_52_P5337 | 272.3   | Detected   | 211.4   | Detected   | 202.3   | Detected   | 235     | Detected   | Ino80         | 0.863018729 | 0.74293059 | 1.11163671 | 0.9569536 |

|            |         |          |         |            |         |          |         |            |               |             |            |            |           |
|------------|---------|----------|---------|------------|---------|----------|---------|------------|---------------|-------------|------------|------------|-----------|
| A_55_P1981 | 4021.1  | Detected | 3231.1  | Detected   | 3097.2  | Detected | 3470.1  | Detected   | Slc35c2       | 0.862972818 | 0.770237   | 1.07396862 | 0.958559  |
| A_55_P2095 | 1054.8  | Detected | 984.8   | Detected   | 1138.4  | Detected | 910.2   | Detected   | Ppp1r16a      | 0.8629124   | 1.07925673 | 0.92424858 | 1.1559708 |
| A_51_P1166 | 22275.8 | Detected | 18410.2 | Detected   | 22356.3 | Detected | 19221.7 | Detected   | Rbm14         | 0.862896058 | 1.00361379 | 1.04407883 | 1.2143431 |
| A_52_P6552 | 1050.5  | Detected | 981.2   | Detected   | 370.9   | Detected | 906.3   | Detected   | Zfp462        | 0.862732032 | 0.35306997 | 0.92366649 | 0.3780065 |
| A_66_P1351 | 514     | Detected | 371.3   | Detected   | 349.3   | Detected | 443.4   | Detected   | Trak2         | 0.862645914 | 0.67957198 | 1.1941826  | 0.9407487 |
| A_55_P2110 | 18.2    | Detected | 13.7    | Not Detect | 29.1    | Detected | 15.7    | Not Detect | Hcrt          | 0.862637363 | 1.5989011  | 1.1459854  | 2.1240876 |
| A_55_P2075 | 3057.5  | Detected | 2585.4  | Detected   | 2255.1  | Detected | 2637.5  | Detected   | Ttll7         | 0.86263287  | 0.73756337 | 1.02015162 | 0.8722441 |
| A_55_P2138 | 3622.2  | Detected | 4049    | Detected   | 4132.4  | Detected | 3124.6  | Detected   | Xpo4          | 0.862624924 | 1.14085362 | 0.77169672 | 1.0205977 |
| A_55_P2472 | 52.4    | Detected | 48.3    | Detected   | 42.8    | Detected | 45.2    | Detected   | A530032D15Rik | 0.86259542  | 0.81679389 | 0.93581781 | 0.8861284 |
| A_55_P2128 | 4871.5  | Detected | 3788.1  | Detected   | 4842.1  | Detected | 4201.9  | Detected   | Ccnb1         | 0.86254747  | 0.9939649  | 1.10923682 | 1.2782398 |
| A_51_P3954 | 1345.3  | Detected | 365.2   | Detected   | 1631.3  | Detected | 1160.3  | Detected   | Tenc1         | 0.862484204 | 1.21259199 | 3.1771632  | 4.4668675 |
| A_51_P2123 | 351.1   | Detected | 825.9   | Detected   | 222     | Detected | 302.8   | Detected   | Klk10         | 0.862432355 | 0.63229849 | 0.36663034 | 0.2687977 |
| A_55_P1995 | 30409.4 | Detected | 22907.4 | Detected   | 30444.6 | Detected | 26225.8 | Detected   | Rexo4         | 0.862424119 | 1.00115754 | 1.14486149 | 1.329029  |
| A_52_P2431 | 667     | Detected | 573.1   | Detected   | 495     | Detected | 575.2   | Detected   | Kctd3         | 0.862368816 | 0.74212894 | 1.00366428 | 0.8637236 |
| A_52_P2380 | 6138.5  | Detected | 5366.4  | Detected   | 5198.8  | Detected | 5293.6  | Detected   | Psmc3ip       | 0.862360512 | 0.846917   | 0.98643411 | 0.9687686 |
| A_55_P1977 | 159.1   | Detected | 143.8   | Detected   | 118     | Detected | 137.2   | Detected   | Folr4         | 0.862350723 | 0.7416719  | 0.95410292 | 0.8205841 |
| A_52_P7592 | 901.5   | Detected | 947.3   | Detected   | 1055.4  | Detected | 777.4   | Detected   | Gm6787        | 0.862340544 | 1.17071547 | 0.82064816 | 1.1141138 |
| A_51_P4798 | 176.5   | Detected | 124.2   | Detected   | 144.9   | Detected | 152.2   | Detected   | Glb1l         | 0.862322946 | 0.82096317 | 1.22544283 | 1.1666667 |
| A_55_P2138 | 981.9   | Detected | 873.2   | Detected   | 1020.8  | Detected | 846.5   | Detected   | Ndufaf5       | 0.862104084 | 1.03961707 | 0.96942281 | 1.1690334 |
| A_55_P2027 | 364.5   | Detected | 243     | Detected   | 423.8   | Detected | 314.2   | Detected   | BC052040      | 0.862002743 | 1.16268861 | 1.29300412 | 1.7440329 |
| A_52_P5834 | 3537.2  | Detected | 2962    | Detected   | 2654.4  | Detected | 3049    | Detected   | E2f3          | 0.861981228 | 0.75042406 | 1.02937205 | 0.8961512 |
| A_55_P2446 | 73.9    | Detected | 88      | Detected   | 47.1    | Detected | 63.7    | Detected   | Tmem245       | 0.861975643 | 0.63734777 | 0.72386364 | 0.5352273 |
| A_55_P1974 | 54894.6 | Detected | 54167.8 | Detected   | 48845.1 | Detected | 47315.7 | Detected   | Plekhg3       | 0.86193724  | 0.8897979  | 0.87350234 | 0.9017368 |
| A_51_P3567 | 62131.6 | Detected | 45600.8 | Detected   | 59403.5 | Detected | 53552.1 | Detected   | Mcm4          | 0.861914066 | 0.95609159 | 1.17436755 | 1.3026855 |
| A_51_P1921 | 2255    | Detected | 1305.2  | Detected   | 1664.1  | Detected | 1943.6  | Detected   | Slc9a6        | 0.861906874 | 0.73796009 | 1.48912044 | 1.274977  |
| A_51_P3288 | 21      | Detected | 22      | Detected   | 18.4    | Detected | 18.1    | Not Detect | Olf100        | 0.861904762 | 0.87619048 | 0.82272727 | 0.8363636 |
| A_52_P3704 | 13214.4 | Detected | 9773.5  | Detected   | 12611.3 | Detected | 11388.1 | Detected   | Msl1          | 0.861794709 | 0.95436039 | 1.16520182 | 1.2903566 |
| A_55_P2113 | 1472.8  | Detected | 935.1   | Detected   | 1406.9  | Detected | 1269.2  | Detected   | Mospd2        | 0.861759913 | 0.9552553  | 1.35728799 | 1.504545  |
| A_55_P2452 | 795.3   | Detected | 849.5   | Detected   | 698     | Detected | 685.2   | Detected   | N4bp2         | 0.861561675 | 0.87765623 | 0.80659211 | 0.8216598 |
| A_55_P1985 | 2807.4  | Detected | 2305    | Detected   | 2879.5  | Detected | 2418.7  | Detected   | Lmcd1         | 0.86154449  | 1.02568213 | 1.04932755 | 1.2492408 |
| A_51_P2467 | 4729.1  | Detected | 4723.5  | Detected   | 3944.4  | Detected | 4074.3  | Detected   | Nop14         | 0.861538136 | 0.83406991 | 0.86255954 | 0.8350587 |
| A_55_P2081 | 381.3   | Detected | 279.4   | Detected   | 274.9   | Detected | 328.5   | Detected   | Mdm4          | 0.861526357 | 0.72095463 | 1.17573372 | 0.9838941 |
| A_55_P1979 | 4737.2  | Detected | 3494.4  | Detected   | 3589.2  | Detected | 4080.9  | Detected   | Syne2         | 0.861458245 | 0.75766275 | 1.16783997 | 1.0271291 |
| A_55_P2022 | 12570.4 | Detected | 8790    | Detected   | 10355.2 | Detected | 10827.4 | Detected   | Csnk2a1       | 0.861340928 | 0.82377649 | 1.23178612 | 1.178066  |
| A_52_P4329 | 380     | Detected | 1958.2  | Detected   | 52.8    | Detected | 327.3   | Detected   | Pcdh19        | 0.861315789 | 0.13894737 | 0.16714329 | 0.0269635 |
| A_51_P1039 | 647.5   | Detected | 539.8   | Detected   | 633.6   | Detected | 557.7   | Detected   | Met           | 0.861312741 | 0.97853282 | 1.03316043 | 1.1737681 |
| A_55_P2070 | 644.4   | Detected | 560.8   | Detected   | 550.6   | Detected | 555     | Detected   | Zfyve9        | 0.861266294 | 0.85443824 | 0.98965763 | 0.9818117 |
| A_52_P6363 | 1562.3  | Detected | 1447.7  | Detected   | 1603.8  | Detected | 1345.5  | Detected   | Wipi2         | 0.861230237 | 1.0265634  | 0.92940526 | 1.1078262 |
| A_51_P2088 | 777.5   | Detected | 611.8   | Detected   | 1203.2  | Detected | 669.6   | Detected   | Zdhhc24       | 0.861221865 | 1.54752412 | 1.09447532 | 1.9666558 |
| A_52_P2495 | 2715.9  | Detected | 2695.6  | Detected   | 2567.7  | Detected | 2338.9  | Detected   | Cnot11        | 0.86118782  | 0.94543245 | 0.86767325 | 0.9525523 |

|            |          |          |          |            |          |            |          |            |               |             |            |            |           |
|------------|----------|----------|----------|------------|----------|------------|----------|------------|---------------|-------------|------------|------------|-----------|
| A_51_P3895 | 31847    | Detected | 29527.7  | Detected   | 33404.3  | Detected   | 27425.9  | Detected   | Prmt1         | 0.861176877 | 1.04889943 | 0.92881938 | 1.1312869 |
| A_52_P6788 | 21.6     | Detected | 15.6     | Detected   | 19.6     | Detected   | 18.6     | Not Detect | Ctsm          | 0.861111111 | 0.90740741 | 1.19230769 | 1.2564103 |
| A_51_P3004 | 2592.9   | Detected | 1772.4   | Detected   | 1199.8   | Detected   | 2232.7   | Detected   | Dst           | 0.861082186 | 0.46272513 | 1.25970436 | 0.6769352 |
| A_55_P2326 | 3016.7   | Detected | 2675.9   | Detected   | 2630.3   | Detected   | 2597.5   | Detected   | 9330175M20Rik | 0.86104021  | 0.87191302 | 0.97070145 | 0.982959  |
| A_55_P2035 | 144746.5 | Detected | 145527.3 | Detected   | 141422.6 | Detected   | 124626.4 | Detected   | Psmb6         | 0.860997675 | 0.97703641 | 0.85637815 | 0.9717943 |
| A_52_P5639 | 12162.8  | Detected | 11531.7  | Detected   | 9004.2   | Detected   | 10471.6  | Detected   | Clhc1         | 0.86095307  | 0.74030651 | 0.9080708  | 0.7808216 |
| A_55_P2009 | 42967.2  | Detected | 28376    | Detected   | 48381.1  | Detected   | 36991.1  | Detected   | 2010015L04Rik | 0.860914837 | 1.12600076 | 1.30360516 | 1.7050007 |
| A_66_P1393 | 4213.1   | Detected | 3177     | Detected   | 3464.6   | Detected   | 3627.1   | Detected   | Psmd10        | 0.860910019 | 0.82233984 | 1.14167454 | 1.0905257 |
| A_52_P1457 | 2580.3   | Detected | 1955.9   | Detected   | 1863.6   | Detected   | 2221.4   | Detected   | Vcpip1        | 0.860907646 | 0.7222416  | 1.13574314 | 0.9528094 |
| A_55_P2139 | 62658.2  | Detected | 55935.5  | Detected   | 61324.5  | Detected   | 53942.3  | Detected   | Mrps18b       | 0.860897696 | 0.97871468 | 0.9643661  | 1.0963431 |
| A_52_P4186 | 13899.2  | Detected | 10929.6  | Detected   | 9315.3   | Detected   | 11965.5  | Detected   | Ttpal         | 0.860876885 | 0.67020404 | 1.09477931 | 0.8523002 |
| A_55_P2184 | 2786.9   | Detected | 2317.4   | Detected   | 2139.4   | Detected   | 2399.1   | Detected   | Tmem185b      | 0.860848972 | 0.76766299 | 1.03525503 | 0.9231898 |
| A_55_P1971 | 4286.3   | Detected | 3288.3   | Detected   | 3878.1   | Detected   | 3689.7   | Detected   | Mbd1          | 0.860812356 | 0.90476635 | 1.12206915 | 1.1793632 |
| A_55_P2182 | 3573.1   | Detected | 2635.2   | Detected   | 3571.7   | Detected   | 3075.7   | Detected   | B4galt7       | 0.860793149 | 0.99960818 | 1.16715999 | 1.355381  |
| A_55_P1957 | 25182.5  | Detected | 25312.7  | Detected   | 25434.2  | Detected   | 21675.1  | Detected   | Timm10        | 0.860720739 | 1.00999504 | 0.85629348 | 1.0048    |
| A_55_P1969 | 350.8    | Detected | 347.2    | Detected   | 275.1    | Detected   | 301.9    | Detected   | Tmem68        | 0.860604333 | 0.78420753 | 0.86952765 | 0.7923387 |
| A_55_P2066 | 862.2    | Detected | 597.2    | Detected   | 1000.1   | Detected   | 742      | Detected   | Hexim2        | 0.86058919  | 1.15993969 | 1.24246484 | 1.6746484 |
| A_66_P1119 | 1735.4   | Detected | 828.9    | Detected   | 1348.5   | Detected   | 1493.4   | Detected   | Brwd3         | 0.860550882 | 0.77705428 | 1.80166486 | 1.6268549 |
| A_55_P2149 | 14857.7  | Detected | 12092.6  | Detected   | 14351.1  | Detected   | 12785.8  | Detected   | Mff           | 0.860550422 | 0.9659032  | 1.05732431 | 1.1867671 |
| A_66_P1301 | 1220.1   | Detected | 1065.6   | Detected   | 1208.2   | Detected   | 1049.9   | Detected   | Rab23         | 0.860503237 | 0.9902467  | 0.98526652 | 1.1338213 |
| A_55_P1964 | 17.2     | Detected | 16.1     | Not Detect | 20.6     | Detected   | 14.8     | Not Detect | Kctd14        | 0.860465116 | 1.19767442 | 0.91925466 | 1.2795031 |
| A_55_P1975 | 34328.2  | Detected | 29928.7  | Detected   | 28286.3  | Detected   | 29537.2  | Detected   | Nasp          | 0.860435444 | 0.82399601 | 0.98691891 | 0.9451229 |
| A_55_P2072 | 40.1     | Detected | 30.3     | Detected   | 24       | Detected   | 34.5     | Not Detect | Chic1         | 0.860349127 | 0.59850374 | 1.13861386 | 0.7920792 |
| A_65_P1945 | 3012.2   | Detected | 1990.9   | Detected   | 2046.6   | Detected   | 2591.2   | Detected   | Rock2         | 0.860235044 | 0.67943696 | 1.30152192 | 1.0279773 |
| A_51_P1683 | 722.9    | Detected | 491.7    | Detected   | 956.4    | Detected   | 621.8    | Detected   | Ttc30a1       | 0.860146632 | 1.32300456 | 1.26459223 | 1.9450885 |
| A_55_P1992 | 16224.2  | Detected | 14539.3  | Detected   | 10720.9  | Detected   | 13955    | Detected   | Ptpf          | 0.86013486  | 0.66079683 | 0.95981237 | 0.7373739 |
| A_55_P1987 | 5361.1   | Detected | 4891.7   | Detected   | 5290.2   | Detected   | 4610.5   | Detected   | Ywhaz         | 0.85999142  | 0.9867751  | 0.94251487 | 1.0814645 |
| A_52_P3682 | 585.5    | Detected | 590.3    | Detected   | 501.6    | Detected   | 503.5    | Detected   | Bcl7c         | 0.859948762 | 0.85670367 | 0.85295612 | 0.8497374 |
| A_55_P2200 | 20.7     | Detected | 23.4     | Detected   | 20.7     | Detected   | 17.8     | Not Detect | 4933407G14Rik | 0.859903382 | 1          | 0.76068376 | 0.8846154 |
| A_55_P2105 | 16.4     | Detected | 18.8     | Detected   | 5.9      | Not Detect | 14.1     | Not Detect | Defb47        | 0.859756098 | 0.3597561  | 0.75       | 0.3138298 |
| A_51_P4552 | 5888.8   | Detected | 4845.1   | Detected   | 5670     | Detected   | 5062.9   | Detected   | Rrp36         | 0.859750713 | 0.96284472 | 1.04495263 | 1.1702545 |
| A_55_P2205 | 503.3    | Detected | 352.1    | Detected   | 477.3    | Detected   | 432.7    | Detected   | Hnf1b         | 0.85972581  | 0.94834095 | 1.22891224 | 1.3555808 |
| A_65_P1253 | 22994    | Detected | 21036.1  | Detected   | 21919.9  | Detected   | 19767.1  | Detected   | Naa10         | 0.85966339  | 0.95328781 | 0.93967513 | 1.0420135 |
| A_55_P2012 | 22.8     | Detected | 24.8     | Detected   | 16.7     | Detected   | 19.6     | Not Detect | Gm101         | 0.859649123 | 0.73245614 | 0.79032258 | 0.6733871 |
| A_51_P4280 | 791.9    | Detected | 691.7    | Detected   | 444.1    | Detected   | 680.7    | Detected   | Sptbn1        | 0.85957823  | 0.56080313 | 0.98409715 | 0.6420413 |
| A_55_P2108 | 118908.1 | Detected | 78472.4  | Detected   | 121923.8 | Detected   | 102206.4 | Detected   | A430078G23Rik | 0.859541108 | 1.0253616  | 1.30245029 | 1.5537157 |
| A_55_P1953 | 42       | Detected | 28.5     | Detected   | 15.9     | Not Detect | 36.1     | Not Detect | Gm11033       | 0.85952381  | 0.37857143 | 1.26666667 | 0.5578947 |
| A_51_P4419 | 5538.8   | Detected | 5487.2   | Detected   | 5606.7   | Detected   | 4759.8   | Detected   | Pip5k1a       | 0.859355817 | 1.01225897 | 0.86743694 | 1.021778  |
| A_55_P2034 | 56519.2  | Detected | 57832    | Detected   | 44973.3  | Detected   | 48564.6  | Detected   | Erdr1         | 0.859258447 | 0.79571721 | 0.83975308 | 0.7776542 |
| A_51_P5182 | 77775.5  | Detected | 72050.2  | Detected   | 68686.3  | Detected   | 66823    | Detected   | Rnf187        | 0.859178019 | 0.88313543 | 0.92745058 | 0.9533117 |

|            |          |            |          |            |          |            |          |            |              |             |             |            |            |           |
|------------|----------|------------|----------|------------|----------|------------|----------|------------|--------------|-------------|-------------|------------|------------|-----------|
| A_55_P2062 | 223.6    | Detected   | 197.2    | Detected   | 206.7    | Detected   | 192.1    | Detected   | Mettl8       | 0.859123435 | 0.9244186   | 0.97413793 | 1.0481744  |           |
| A_55_P2123 | 58.2     | Detected   | 45.1     | Detected   | 35.2     | Detected   | 50       | Not Detect | Map3k10      | 0.859106529 | 0.604811    | 1.10864745 | 0.7804878  |           |
| A_52_P4846 | 1087.8   | Detected   | 1028.7   | Detected   | 1049     | Detected   | 934.5    | Detected   | Zfp451       | 0.859073359 | 0.96433168  | 0.90842811 | 1.0197336  |           |
| A_55_P1992 | 16631.8  | Detected   | 14532    | Detected   | 15334.5  | Detected   | 14286.9  | Detected   | Gm8457       | 0.859011051 | 0.92199882  | 0.98313377 | 1.055223   |           |
| A_55_P2028 | 15.6     | Detected   | 12.8     | Not Detect | 13.3     | Not Detect | 13.4     | Not Detect | C87499       | 0.858974359 | 0.8525641   | 1.046875   | 1.0390625  |           |
| A_55_P1999 | 11616.3  | Detected   | 10473.7  | Detected   | 10314    | Detected   | 9978     | Detected   | Gbp1         | 0.858965419 | 0.88789029  | 0.95267193 | 0.9847523  |           |
| A_55_P2028 | 7956.8   | Detected   | 6163.3   | Detected   | 9009     | Detected   | 6834.1   | Detected   | Ptplb        | 0.858900563 | 1.13223909  | 1.1088378  | 1.4617169  |           |
| A_51_P2495 | 4311.3   | Detected   | 3629.8   | Detected   | 4972.9   | Detected   | 3702.7   | Detected   | Wdr24        | 0.858836082 | 1.15345719  | 1.02008375 | 1.3700204  |           |
| A_55_P2033 | 265666.1 | Detected   | 238580.8 | Detected   | 256365.1 | Detected   | 228142.8 | Detected   | Rps23        | 0.858757666 | 0.96498989  | 0.95624962 | 1.074542   |           |
| A_55_P1999 | 36.1     | Detected   | 28.8     | Detected   | 25.3     | Detected   | 31       | Not Detect | Vmn1r217     | 0.858725762 | 0.70083102  | 1.07638889 | 0.8784722  |           |
| A_55_P1992 | 2661.3   | Detected   | 2311.7   | Detected   | 2863.4   | Detected   | 2285.2   | Detected   | Hdac3        | 0.85867809  | 1.07594033  | 0.98853657 | 1.2386555  |           |
| A_55_P2166 | 698.3    | Detected   | 697.6    | Detected   | 566.9    | Detected   | 599.6    | Detected   | Zfx          | 0.858656738 | 0.81182873  | 0.85951835 | 0.8126433  |           |
| A_51_P2521 | 86.3     | Detected   | 72.4     | Detected   | 78.3     | Detected   | 74.1     | Detected   | Sla2         | 0.858632677 | 0.90730012  | 1.02348066 | 1.0814917  |           |
| A_51_P1481 | 17442    | Detected   | 14150.2  | Detected   | 18961.5  | Detected   | 14975.7  | Detected   | Klhdc3       | 0.858599931 | 1.0871173   | 1.0583384  | 1.3400164  |           |
| A_55_P2141 | 304.1    | Detected   | 238.6    | Detected   | 211.2    | Detected   | 261.1    | Detected   | Dock7        | 0.858599145 | 0.69450839  | 1.09430008 | 0.8851635  |           |
| A_52_P6762 | 220729.9 | Detected   | 199623.8 | Detected   | 204883.7 | Detected   | 189517.7 | Detected   | Tuba4a       | 0.858595505 | 0.92821     | 0.94937427 | 1.0263491  |           |
| A_55_P1966 | 15856.8  | Detected   | 18542.4  | Detected   | 13786.6  | Detected   | 13612    | Detected   | Epn2         | 0.858432975 | 0.86944402  | 0.7341013  | 0.7435176  |           |
| A_55_P2132 | 166.7    | Detected   | 116.8    | Detected   | 109.1    | Detected   | 143.1    | Detected   | Rsf1         | 0.858428314 | 0.65446911  | 1.22517123 | 0.9340753  |           |
| A_51_P4479 | 13182.7  | Detected   | 9797.2   | Detected   | 9653.1   | Detected   | 11316    | Detected   | Atp6ap1      | 0.858397749 | 0.73225515  | 1.15502388 | 0.9852917  |           |
| A_55_P2084 | 302.2    | Detected   | 276.2    | Detected   | 199.3    | Detected   | 259.4    | Detected   | Rbm12b2      | 0.858371939 | 0.65949702  | 0.93917451 | 0.7215786  |           |
| A_52_P4561 | 699.6    | Detected   | 591.8    | Detected   | 722.3    | Detected   | 600.5    | Detected   | Orc4         | 0.858347627 | 1.03244711  | 1.01470091 | 1.2205137  |           |
| A_55_P2109 | 5544.7   | Detected   | 3600.2   | Detected   | 4859.4   | Detected   | 4759.1   | Detected   | Gba2         | 0.858315148 | 0.87640449  | 1.32189878 | 1.3497583  |           |
| A_55_P2026 | 11941.5  | Detected   | 9274.3   | Detected   | 11460.7  | Detected   | 10249.5  | Detected   | Unc50        | 0.858309258 | 0.95973705  | 1.10515079 | 1.2357483  |           |
| A_55_P2184 | 12.7     | Not Detect | 15.6     | Not Detect | 28.4     | Detected   | 10.9     | Not Detect | Atp1a4       | 0.858267717 | 2.23622047  | 0.69871795 | 1.8205128  |           |
| A_55_P2163 | 12.7     | Not Detect | 42.2     | Detected   | 5.5      | Not Detect | 10.9     | Not Detect | Uox          | 0.858267717 | 0.43307087  | 0.25829384 | 0.1303318  |           |
| A_55_P2043 | 36765.6  | Detected   | 37030.1  | Detected   | 27424.7  | Detected   | 31552.4  | Detected   | Exosc9       | 0.858204408 | 0.7459337   | 0.85207439 | 0.7406056  |           |
| A_51_P1524 | 3927.9   | Detected   | 4412.2   | Detected   | 3059.1   | Detected   | 3370.8   | Detected   | Ikbip        | 0.858168487 | 0.77881311  | 0.76397262 | 0.6933276  |           |
| A_55_P2072 | 89044    | Detected   | 83637.4  | Detected   | 80024.3  | Detected   | 76397.9  | Detected   |              | 3-Sep       | 0.857979201 | 0.89870513 | 0.91344183 | 0.9568004 |
| A_51_P1340 | 112602.1 | Detected   | 114857.7 | Detected   | 104802.3 | Detected   | 96604.1  | Detected   | Ncl          | 0.857924497 | 0.93073131  | 0.84107639 | 0.9124534  |           |
| A_55_P2040 | 44057.5  | Detected   | 36593.6  | Detected   | 49677    | Detected   | 37795.7  | Detected   | Rnaset2a     | 0.857872099 | 1.12754923  | 1.03285001 | 1.3575325  |           |
| A_55_P2391 | 609.3    | Detected   | 464.1    | Detected   | 384.5    | Detected   | 522.7    | Detected   | Cep128       | 0.857869687 | 0.63105203  | 1.12626589 | 0.8284852  |           |
| A_51_P1653 | 111538.3 | Detected   | 97860    | Detected   | 102090.6 | Detected   | 95681    | Detected   | Mrpl33       | 0.857830898 | 0.91529636  | 0.9777335  | 1.0432311  |           |
| A_51_P2863 | 25822.9  | Detected   | 24726.9  | Detected   | 21773.9  | Detected   | 22150.6  | Detected   | Ttll12       | 0.857789017 | 0.84320119  | 0.89580983 | 0.8805754  |           |
| A_55_P2172 | 2324.6   | Detected   | 1855.5   | Detected   | 1880.3   | Detected   | 1993.8   | Detected   | Pds5a        | 0.857695948 | 0.80887034  | 1.07453517 | 1.0133657  |           |
| A_55_P2297 | 53.4     | Detected   | 54.1     | Detected   | 47.4     | Detected   | 45.8     | Detected   | C85181       | 0.857677903 | 0.88764045  | 0.84658041 | 0.8761553  |           |
| A_55_P2018 | 6076.7   | Detected   | 4614.3   | Detected   | 4538.1   | Detected   | 5211.6   | Detected   | Fmr1         | 0.857636546 | 0.74680336  | 1.12944542 | 0.9834861  |           |
| A_55_P2088 | 47860.9  | Detected   | 43718.5  | Detected   | 52315.2  | Detected   | 41047.1  | Detected   | Usp14        | 0.857633266 | 1.09306762  | 0.93889543 | 1.1966376  |           |
| A_55_P2029 | 43738.1  | Detected   | 38419.2  | Detected   | 44916.6  | Detected   | 37509.2  | Detected   | LOC101055813 | 0.857586406 | 1.02694447  | 0.97631393 | 1.1691186  |           |
| A_51_P4405 | 4425.1   | Detected   | 3973.8   | Detected   | 4135.4   | Detected   | 3794.4   | Detected   | Stk19        | 0.857472148 | 0.93453255  | 0.9548543  | 1.0406664  |           |
| A_51_P4294 | 7868.2   | Detected   | 5067.3   | Detected   | 7601.7   | Detected   | 6746     | Detected   | Fam188a      | 0.857375257 | 0.96612948  | 1.33128096 | 1.500148   |           |

|            |          |            |          |          |          |            |          |            |               |             |            |            |           |
|------------|----------|------------|----------|----------|----------|------------|----------|------------|---------------|-------------|------------|------------|-----------|
| A_55_P2020 | 140.9    | Detected   | 106.8    | Detected | 77       | Detected   | 120.8    | Detected   | Camk1g        | 0.857345635 | 0.54648687 | 1.13108614 | 0.7209738 |
| A_52_P5184 | 230.6    | Detected   | 178.1    | Detected | 241.9    | Detected   | 197.7    | Detected   | Hmbox1        | 0.857328708 | 1.0490026  | 1.11005053 | 1.3582257 |
| A_55_P2179 | 89017.9  | Detected   | 58280    | Detected | 90909.6  | Detected   | 76314.7  | Detected   | Wdr31         | 0.857296117 | 1.02125078 | 1.30944921 | 1.5598765 |
| A_55_P2131 | 303.4    | Detected   | 301.8    | Detected | 361.8    | Detected   | 260.1    | Detected   | Gm5878        | 0.857284113 | 1.19248517 | 0.86182903 | 1.1988072 |
| A_55_P2120 | 3344.4   | Detected   | 4172.9   | Detected | 3837     | Detected   | 2867.1   | Detected   | Wdr12         | 0.857283818 | 1.14729099 | 0.68707613 | 0.9195044 |
| A_55_P2013 | 32571.3  | Detected   | 24752.6  | Detected | 27973    | Detected   | 27919.2  | Detected   | Bak1          | 0.857171805 | 0.85882357 | 1.12793    | 1.1301035 |
| A_55_P2165 | 8097.8   | Detected   | 5497.4   | Detected | 7974.6   | Detected   | 6941.2   | Detected   | Gemin7        | 0.857171084 | 0.98478599 | 1.26263324 | 1.450613  |
| A_55_P2014 | 11.9     | Not Detect | 51       | Detected | 4.2      | Not Detect | 10.2     | Not Detect | Tcl1b4        | 0.857142857 | 0.35294118 | 0.2        | 0.0823529 |
| A_55_P1964 | 6895.1   | Detected   | 5904.8   | Detected | 6798.2   | Detected   | 5909.9   | Detected   | Timm8a1       | 0.857115923 | 0.98594654 | 1.0008637  | 1.1513006 |
| A_55_P2072 | 326.1    | Detected   | 424.6    | Detected | 262.1    | Detected   | 279.5    | Detected   | Gmps          | 0.857099049 | 0.80374118 | 0.6582666  | 0.6172869 |
| A_51_P5114 | 6668.7   | Detected   | 3612.2   | Detected | 5163.8   | Detected   | 5715.1   | Detected   | Ift57         | 0.857003614 | 0.77433383 | 1.58216599 | 1.4295443 |
| A_55_P2135 | 127264.8 | Detected   | 115388.8 | Detected | 107696.9 | Detected   | 109065.7 | Detected   | Ms4a4c        | 0.856998164 | 0.84624264 | 0.94520179 | 0.9333393 |
| A_51_P2549 | 10663.8  | Detected   | 7218.8   | Detected | 3340.3   | Detected   | 9138.5   | Detected   | Serf1         | 0.856964684 | 0.31323731 | 1.26593063 | 0.4627223 |
| A_55_P2037 | 16204.2  | Detected   | 12242.1  | Detected | 13667.5  | Detected   | 13886.1  | Detected   | Pja1          | 0.856944496 | 0.84345417 | 1.13429069 | 1.1164343 |
| A_66_P1342 | 2270     | Detected   | 2028     | Detected | 1560     | Detected   | 1945.2   | Detected   | Uba1y         | 0.8569163   | 0.68722467 | 0.9591716  | 0.7692308 |
| A_55_P2058 | 12133.3  | Detected   | 8755.4   | Detected | 10660.3  | Detected   | 10397    | Detected   | Otud5         | 0.856897959 | 0.87859857 | 1.18749572 | 1.2175686 |
| A_55_P2128 | 15369.6  | Detected   | 10766.1  | Detected | 11835.6  | Detected   | 13169.1  | Detected   | Nckap1        | 0.856827764 | 0.77006558 | 1.2232006  | 1.0993396 |
| A_55_P2063 | 99952.5  | Detected   | 94691.3  | Detected | 90060.3  | Detected   | 85642    | Detected   | Ogfod1        | 0.856826993 | 0.90103099 | 0.90443367 | 0.9510937 |
| A_51_P1961 | 2975.7   | Detected   | 2398     | Detected | 2566.1   | Detected   | 2549.6   | Detected   | Btd           | 0.856806802 | 0.86235172 | 1.06321935 | 1.0701001 |
| A_55_P2088 | 5415.5   | Detected   | 3440.2   | Detected | 5395.8   | Detected   | 4639.8   | Detected   | BC094435      | 0.856762995 | 0.99636229 | 1.34870066 | 1.5684553 |
| A_52_P1078 | 7494.6   | Detected   | 10425.6  | Detected | 9674     | Detected   | 6420.8   | Detected   | Lman1         | 0.856723508 | 1.29079604 | 0.61586863 | 0.9279082 |
| A_55_P2047 | 67.7     | Detected   | 44.5     | Detected | 50.5     | Detected   | 58       | Detected   | Lcn6          | 0.856720827 | 0.74593796 | 1.30337079 | 1.1348315 |
| A_55_P1967 | 3639.7   | Detected   | 2049     | Detected | 3393.3   | Detected   | 3118.1   | Detected   | Lactb         | 0.856691486 | 0.93230211 | 1.52176672 | 1.6560761 |
| A_55_P1958 | 35522.9  | Detected   | 36641.4  | Detected | 33626.7  | Detected   | 30428.5  | Detected   | Brd2          | 0.856588285 | 0.94662035 | 0.83044043 | 0.9177242 |
| A_55_P2171 | 146596.7 | Detected   | 97443.9  | Detected | 143961   | Detected   | 125558.1 | Detected   | Hmgn1         | 0.856486538 | 0.98202074 | 1.28851678 | 1.4773731 |
| A_55_P2096 | 4340.9   | Detected   | 3269.7   | Detected | 2733.3   | Detected   | 3717.9   | Detected   | Icmt          | 0.856481375 | 0.62966205 | 1.1370768  | 0.8359483 |
| A_52_P8917 | 14171.4  | Detected   | 8661.5   | Detected | 7513.2   | Detected   | 12136.8  | Detected   | Cdr2l         | 0.856429146 | 0.53016639 | 1.40123535 | 0.8674248 |
| A_52_P2404 | 6521.9   | Detected   | 4641     | Detected | 7666.4   | Detected   | 5585.2   | Detected   | Polr3k        | 0.856376209 | 1.17548567 | 1.20344753 | 1.6518854 |
| A_55_P2150 | 35.5     | Detected   | 22.6     | Detected | 52.3     | Detected   | 30.4     | Not Detect | Mmp28         | 0.856338028 | 1.47323944 | 1.34513274 | 2.3141593 |
| A_55_P2011 | 8586.9   | Detected   | 7784.5   | Detected | 7238.4   | Detected   | 7353     | Detected   | Tmprss3       | 0.856304371 | 0.84295846 | 0.94456934 | 0.9298478 |
| A_55_P1998 | 16536.4  | Detected   | 14437.9  | Detected | 11912.9  | Detected   | 14158.8  | Detected   | Sms           | 0.856220217 | 0.72040468 | 0.98066893 | 0.8251131 |
| A_55_P2153 | 2364     | Detected   | 1939.5   | Detected | 1719.7   | Detected   | 2023.8   | Detected   | Prnp          | 0.856091371 | 0.72745347 | 1.04346481 | 0.8866718 |
| A_51_P4825 | 8724.6   | Detected   | 10245.7  | Detected | 8939.4   | Detected   | 7468     | Detected   | Tpd52l1       | 0.855970474 | 1.02462004 | 0.72889114 | 0.8725026 |
| A_55_P2068 | 21398.1  | Detected   | 18246.8  | Detected | 18364    | Detected   | 18315.5  | Detected   | Gm11412       | 0.855940481 | 0.85820704 | 1.00376504 | 1.006423  |
| A_55_P2338 | 11.8     | Not Detect | 21.7     | Detected | 21.3     | Detected   | 10.1     | Not Detect | 1700020G03Rik | 0.855932203 | 1.80508475 | 0.46543779 | 0.9815668 |
| A_52_P3059 | 1368.9   | Detected   | 1835.8   | Detected | 829.5    | Detected   | 1171.6   | Detected   | Ammecr1       | 0.855869676 | 0.60596099 | 0.63819588 | 0.4518466 |
| A_55_P2133 | 1289.8   | Detected   | 1289.4   | Detected | 1021.5   | Detected   | 1103.9   | Detected   | Snhg5         | 0.855869127 | 0.79198325 | 0.85613464 | 0.7922289 |
| A_51_P4833 | 6143.3   | Detected   | 4851.2   | Detected | 5663.3   | Detected   | 5257.8   | Detected   | Txndc5        | 0.855859229 | 0.9218661  | 1.08381431 | 1.1674019 |
| A_55_P2070 | 11.1     | Not Detect | 17.1     | Detected | 14.4     | Not Detect | 9.5      | Not Detect | Olfir692      | 0.855855856 | 1.2972973  | 0.55555556 | 0.8421053 |
| A_55_P2182 | 11.1     | Not Detect | 28.7     | Detected | 14       | Not Detect | 9.5      | Not Detect | 2310047D07Rik | 0.855855856 | 1.26126126 | 0.33101045 | 0.4878049 |

|            |         |            |         |          |          |            |         |            |               |             |            |            |           |
|------------|---------|------------|---------|----------|----------|------------|---------|------------|---------------|-------------|------------|------------|-----------|
| A_55_P2169 | 328.8   | Detected   | 271.1   | Detected | 388.4    | Detected   | 281.4   | Detected   | Usf1          | 0.855839416 | 1.18126521 | 1.03799336 | 1.4326817 |
| A_51_P3754 | 3011.2  | Detected   | 3491.1  | Detected | 4184.4   | Detected   | 2577.1  | Detected   | Rprd1a        | 0.855838204 | 1.38961211 | 0.7381914  | 1.1985907 |
| A_55_P2075 | 2630.1  | Detected   | 2448.2  | Detected | 2291.5   | Detected   | 2250.9  | Detected   | Atp8a1        | 0.855822973 | 0.87125965 | 0.91941018 | 0.9359938 |
| A_51_P2391 | 10195   | Detected   | 9267.8  | Detected | 12013    | Detected   | 8723.9  | Detected   | Zfp35         | 0.855703776 | 1.17832271 | 0.94131293 | 1.2962084 |
| A_51_P3829 | 6826.7  | Detected   | 7007.5  | Detected | 6112.8   | Detected   | 5840.9  | Detected   | Cstf3         | 0.855596408 | 0.89542532 | 0.83352123 | 0.8723225 |
| A_66_P1044 | 2610.8  | Detected   | 2479.3  | Detected | 2740.4   | Detected   | 2233.4  | Detected   | Polg2         | 0.855446606 | 1.04963996 | 0.90081878 | 1.105312  |
| A_52_P4286 | 207.2   | Detected   | 126.2   | Detected | 143.9    | Detected   | 177.2   | Detected   | Usp49         | 0.855212355 | 0.69449807 | 1.40412044 | 1.1402536 |
| A_55_P2074 | 35.9    | Detected   | 35.8    | Detected | 5.9      | Not Detect | 30.7    | Not Detect | Hoxc4         | 0.855153203 | 0.1643454  | 0.8575419  | 0.1648045 |
| A_51_P1253 | 10443.1 | Detected   | 10944.1 | Detected | 12045    | Detected   | 8929.6  | Detected   | Hars          | 0.85507177  | 1.15339315 | 0.81592822 | 1.100593  |
| A_55_P1956 | 41748.8 | Detected   | 29140.9 | Detected | 30551.2  | Detected   | 35693.8 | Detected   | Tln1          | 0.854965891 | 0.7317863  | 1.22486951 | 1.0483959 |
| A_51_P2035 | 16808.2 | Detected   | 13158.3 | Detected | 15358.7  | Detected   | 14370.3 | Detected   | Vars          | 0.854957699 | 0.91376233 | 1.09210916 | 1.1672252 |
| A_55_P2399 | 89.5    | Detected   | 87.8    | Detected | 113.3    | Detected   | 76.5    | Detected   | 4930402F11Rik | 0.854748603 | 1.26592179 | 0.87129841 | 1.2904328 |
| A_66_P1329 | 57.8    | Detected   | 60.8    | Detected | 42.2     | Detected   | 49.4    | Detected   | Ccdc15        | 0.85467128  | 0.73010381 | 0.8125     | 0.6940789 |
| A_55_P2124 | 70.1    | Detected   | 72.4    | Detected | 43.4     | Detected   | 59.9    | Detected   | Vsig8         | 0.854493581 | 0.61911555 | 0.82734807 | 0.5994475 |
| A_55_P1977 | 5795    | Detected   | 5007.3  | Detected | 4790.8   | Detected   | 4951.6  | Detected   | Fam110a       | 0.854460742 | 0.82671268 | 0.98887624 | 0.9567631 |
| A_51_P1746 | 18255.1 | Detected   | 18116   | Detected | 15209.1  | Detected   | 15596.1 | Detected   | Bzw2          | 0.854342074 | 0.83314252 | 0.86090197 | 0.8395396 |
| A_51_P1594 | 2594.3  | Detected   | 1818.1  | Detected | 2431.6   | Detected   | 2216.2  | Detected   | Sin3a         | 0.85425741  | 0.93728559 | 1.21896485 | 1.3374402 |
| A_55_P2130 | 3257.7  | Detected   | 2691    | Detected | 2245.5   | Detected   | 2782.7  | Detected   | Tpr           | 0.854191608 | 0.68928999 | 1.03407655 | 0.8344482 |
| A_52_P4284 | 16930.8 | Detected   | 15666.1 | Detected | 15395.2  | Detected   | 14461.8 | Detected   | Tsn           | 0.854171096 | 0.90930139 | 0.92312701 | 0.9827079 |
| A_55_P2089 | 11593.4 | Detected   | 9561.6  | Detected | 9606.3   | Detected   | 9902.4  | Detected   | 9830147E19Rik | 0.854141149 | 0.82860076 | 1.03564257 | 1.0046749 |
| A_55_P2162 | 74      | Detected   | 54.9    | Detected | 42.1     | Detected   | 63.2    | Detected   | Asic4         | 0.854054054 | 0.56891892 | 1.15118397 | 0.7668488 |
| A_55_P1963 | 1938.9  | Detected   | 1438.5  | Detected | 2140.4   | Detected   | 1655.9  | Detected   | Cenpq         | 0.854040951 | 1.10392491 | 1.15112965 | 1.4879388 |
| A_51_P1546 | 47465   | Detected   | 41647.1 | Detected | 41626.4  | Detected   | 40534.2 | Detected   | Alyref        | 0.853980828 | 0.87699147 | 0.97327785 | 0.999503  |
| A_55_P2089 | 175.9   | Detected   | 155.2   | Detected | 118.9    | Detected   | 150.2   | Detected   | Cd6           | 0.853894258 | 0.67595225 | 0.96778351 | 0.7661082 |
| A_52_P3372 | 102.6   | Detected   | 94.5    | Detected | 78       | Detected   | 87.6    | Detected   | B230340J04Rik | 0.85380117  | 0.76023392 | 0.92698413 | 0.8253968 |
| A_51_P2885 | 632.5   | Detected   | 566.2   | Detected | 511.9    | Detected   | 540     | Detected   | Jmjd7         | 0.853754941 | 0.80932806 | 0.9537266  | 0.9040975 |
| A_55_P1952 | 116223  | Detected   | 114862  | Detected | 105123.8 | Detected   | 99222.2 | Detected   | Psma3         | 0.853722585 | 0.90450083 | 0.86383835 | 0.9152183 |
| A_66_P1156 | 60.8    | Detected   | 37.8    | Detected | 46.8     | Detected   | 51.9    | Detected   | Tmem72        | 0.853618421 | 0.76973684 | 1.37301587 | 1.2380952 |
| A_52_P5411 | 2832.2  | Detected   | 1474.2  | Detected | 2695.7   | Detected   | 2417.6  | Detected   | Marveld1      | 0.853612033 | 0.95180425 | 1.63994031 | 1.828585  |
| A_51_P2920 | 1875.5  | Detected   | 1465.8  | Detected | 1955.1   | Detected   | 1600.9  | Detected   | Tbl1xr1       | 0.85358571  | 1.04244202 | 1.0921681  | 1.3338109 |
| A_52_P5570 | 32.1    | Detected   | 24.4    | Detected | 28.8     | Detected   | 27.4    | Not Detect | Olfir536      | 0.853582555 | 0.89719626 | 1.12295082 | 1.1803279 |
| A_55_P1997 | 13601.1 | Detected   | 11210.9 | Detected | 12407.6  | Detected   | 11609.6 | Detected   | Slc9a8        | 0.853578019 | 0.91224974 | 1.0355636  | 1.1067443 |
| A_51_P3490 | 186.3   | Detected   | 243.5   | Detected | 476.4    | Detected   | 159     | Detected   | Pacrg         | 0.853462158 | 2.55716586 | 0.65297741 | 1.9564682 |
| A_55_P2181 | 11.6    | Not Detect | 20.8    | Detected | 11.8     | Not Detect | 9.9     | Not Detect | Ecel1         | 0.853448276 | 1.01724138 | 0.47596154 | 0.5673077 |
| A_51_P2866 | 4193.1  | Detected   | 2774.8  | Detected | 3156.7   | Detected   | 3578.4  | Detected   | Rbl1          | 0.853402018 | 0.75283203 | 1.28960646 | 1.1376315 |
| A_55_P2320 | 1559.2  | Detected   | 1335.5  | Detected | 1691.7   | Detected   | 1330.6  | Detected   | 4833415N18Rik | 0.853386352 | 1.08497948 | 0.99633096 | 1.2667166 |
| A_51_P1660 | 577     | Detected   | 450.7   | Detected | 300.5    | Detected   | 492.4   | Detected   | Hip1          | 0.853379549 | 0.52079723 | 1.09252274 | 0.6667406 |
| A_55_P2016 | 26350.2 | Detected   | 22557.9 | Detected | 23380.7  | Detected   | 22486.7 | Detected   | Uggt1         | 0.853378722 | 0.88730636 | 0.99684368 | 1.036475  |
| A_55_P2035 | 1329.1  | Detected   | 791.1   | Detected | 1020.4   | Detected   | 1134.2  | Detected   | Gyk           | 0.853359416 | 0.76773757 | 1.43369991 | 1.2898496 |
| A_55_P2020 | 712.8   | Detected   | 660     | Detected | 732.9    | Detected   | 608.1   | Detected   | Iscu          | 0.853114478 | 1.02819865 | 0.92136364 | 1.1104545 |

|            |         |            |         |            |         |            |         |            |                |             |            |            |           |
|------------|---------|------------|---------|------------|---------|------------|---------|------------|----------------|-------------|------------|------------|-----------|
| A_55_P2007 | 30190.1 | Detected   | 22337.3 | Detected   | 28549.6 | Detected   | 25754.1 | Detected   | Tspan4         | 0.853064415 | 0.94566099 | 1.15296388 | 1.2781133 |
| A_55_P2024 | 1370    | Detected   | 1456.7  | Detected   | 1657.8  | Detected   | 1168.5  | Detected   | Fam35a         | 0.852919708 | 1.21007299 | 0.80215556 | 1.1380518 |
| A_66_P1199 | 67.3    | Detected   | 56.9    | Detected   | 56.7    | Detected   | 57.4    | Detected   | Glec4a1        | 0.852897474 | 0.84249629 | 1.00878735 | 0.9964851 |
| A_66_P1150 | 4895.8  | Detected   | 4288.9  | Detected   | 3890.1  | Detected   | 4175.2  | Detected   | Smc6           | 0.852812615 | 0.79457903 | 0.97348971 | 0.9070158 |
| A_55_P2127 | 10145.7 | Detected   | 9561.6  | Detected   | 8728.2  | Detected   | 8651.7  | Detected   | Nup54          | 0.852745498 | 0.86028564 | 0.9048381  | 0.9128389 |
| A_55_P2049 | 10749.7 | Detected   | 9008.1  | Detected   | 8867.3  | Detected   | 9166.6  | Detected   | Map3k7         | 0.852730774 | 0.82488814 | 1.01759528 | 0.9843696 |
| A_51_P3962 | 4695.8  | Detected   | 3985.2  | Detected   | 2975.7  | Detected   | 4004.1  | Detected   | Nras           | 0.852698156 | 0.63369394 | 1.00474255 | 0.7466877 |
| A_52_P5486 | 564.1   | Detected   | 441.6   | Detected   | 557.3   | Detected   | 481     | Detected   | Pik3c2a        | 0.852685694 | 0.9879454  | 1.08922101 | 1.2620018 |
| A_55_P1969 | 1258.1  | Detected   | 847.7   | Detected   | 1049.9  | Detected   | 1072.5  | Detected   | Zfp146         | 0.852475956 | 0.83451236 | 1.26518816 | 1.2385278 |
| A_51_P2881 | 12.2    | Not Detect | 10.3    | Not Detect | 19      | Detected   | 10.4    | Not Detect | Fpr2           | 0.852459016 | 1.55737705 | 1.00970874 | 1.8446602 |
| A_55_P2015 | 57.6    | Detected   | 58.7    | Detected   | 52.6    | Detected   | 49.1    | Not Detect | 9930111J21Rik1 | 0.852430556 | 0.91319444 | 0.83645656 | 0.8960818 |
| A_55_P2014 | 1273.9  | Detected   | 944.1   | Detected   | 959.9   | Detected   | 1085.8  | Detected   | Zfp341         | 0.852343198 | 0.75351283 | 1.15009003 | 1.0167355 |
| A_52_P1314 | 2603.1  | Detected   | 2156.9  | Detected   | 2676.4  | Detected   | 2218.7  | Detected   | Atg4b          | 0.852329914 | 1.02815873 | 1.02865223 | 1.2408549 |
| A_55_P2036 | 91.4    | Detected   | 63.7    | Detected   | 91.8    | Detected   | 77.9    | Detected   | Klhl10         | 0.852297593 | 1.00437637 | 1.22291994 | 1.4411303 |
| A_55_P2067 | 23997.1 | Detected   | 20254.2 | Detected   | 23255.4 | Detected   | 20451.8 | Detected   | Cplx2          | 0.852261315 | 0.9690921  | 1.009756   | 1.1481767 |
| A_52_P7733 | 549.5   | Detected   | 413     | Detected   | 611.9   | Detected   | 468.2   | Detected   | Ireb2          | 0.852047316 | 1.11355778 | 1.13365617 | 1.4815981 |
| A_51_P4967 | 34295.8 | Detected   | 36630.4 | Detected   | 34386.7 | Detected   | 29219.1 | Detected   | Nop58          | 0.851973128 | 1.00265047 | 0.79767352 | 0.9387476 |
| A_52_P3933 | 1522.8  | Detected   | 1012.1  | Detected   | 1501.6  | Detected   | 1297.3  | Detected   | Fbxw2          | 0.85191752  | 0.98607828 | 1.28179034 | 1.4836479 |
| A_52_P1572 | 611.7   | Detected   | 436.8   | Detected   | 514.9   | Detected   | 521.1   | Detected   | Aqr            | 0.85188818  | 0.84175249 | 1.19299451 | 1.1788004 |
| A_52_P3276 | 24.3    | Detected   | 15.7    | Not Detect | 14.4    | Not Detect | 20.7    | Not Detect | Gbp5           | 0.851851852 | 0.59259259 | 1.31847134 | 0.9171975 |
| A_51_P3012 | 8390.5  | Detected   | 7333.1  | Detected   | 7951.1  | Detected   | 7146.7  | Detected   | Knop1          | 0.85176092  | 0.94763125 | 0.97458101 | 1.0842754 |
| A_55_P2092 | 1869.1  | Detected   | 1405.9  | Detected   | 1738.9  | Detected   | 1592    | Detected   | Ermard         | 0.85174683  | 0.93034081 | 1.13237072 | 1.236859  |
| A_55_P2151 | 23.6    | Detected   | 12.2    | Not Detect | 10.2    | Not Detect | 20.1    | Not Detect | Traf6          | 0.851694915 | 0.43220339 | 1.64754098 | 0.8360656 |
| A_51_P2155 | 5344.4  | Detected   | 4940.8  | Detected   | 4819.4  | Detected   | 4551.3  | Detected   | Rnf4           | 0.851601677 | 0.90176633 | 0.92116661 | 0.9754291 |
| A_66_P1068 | 56096.8 | Detected   | 52093.9 | Detected   | 59603.1 | Detected   | 47770.3 | Detected   | Mrps18b        | 0.851569073 | 1.06250446 | 0.91700372 | 1.1441474 |
| A_55_P1978 | 80.1    | Detected   | 260.1   | Detected   | 3.6     | Not Detect | 68.2    | Detected   | Sybu           | 0.851435705 | 0.04494382 | 0.26220684 | 0.0138408 |
| A_55_P2019 | 19084.9 | Detected   | 11818.4 | Detected   | 20137.7 | Detected   | 16248.9 | Detected   | Tnks1bp1       | 0.851400846 | 1.05516403 | 1.37488154 | 1.7039278 |
| A_51_P1553 | 4919.7  | Detected   | 4043.1  | Detected   | 5118.1  | Detected   | 4188.1  | Detected   | Rbfa           | 0.851291745 | 1.04032766 | 1.03586357 | 1.2658851 |
| A_66_P1221 | 7642.1  | Detected   | 4521.8  | Detected   | 5629.6  | Detected   | 6505.2  | Detected   | Mkl2           | 0.851231991 | 0.73665615 | 1.43863063 | 1.2449909 |
| A_55_P2026 | 9395.5  | Detected   | 8645.7  | Detected   | 5939.9  | Detected   | 7997.4  | Detected   | Trim32         | 0.851194721 | 0.63220691 | 0.92501475 | 0.6870352 |
| A_55_P2058 | 1557.3  | Detected   | 1749    | Detected   | 1243.7  | Detected   | 1325.5  | Detected   | Tmem206        | 0.851152636 | 0.79862583 | 0.75786164 | 0.7110921 |
| A_55_P2048 | 324.3   | Detected   | 289.8   | Detected   | 395.5   | Detected   | 276     | Detected   | Suv420h1       | 0.85106383  | 1.2195498  | 0.95238095 | 1.3647343 |
| A_52_P6388 | 8385    | Detected   | 4001.3  | Detected   | 8534    | Detected   | 7136.1  | Detected   | Vegfa          | 0.851055456 | 1.01776983 | 1.78344538 | 2.1328068 |
| A_51_P2007 | 7083.1  | Detected   | 6335.5  | Detected   | 6475.7  | Detected   | 6027.1  | Detected   | Grsf1          | 0.850912736 | 0.91424659 | 0.95132192 | 1.0221293 |
| A_55_P1959 | 604.2   | Detected   | 487.1   | Detected   | 439     | Detected   | 514.1   | Detected   | Lrrfip1        | 0.850877193 | 0.7265806  | 1.0554301  | 0.9012523 |
| A_55_P1978 | 11626.8 | Detected   | 11680   | Detected   | 10542.1 | Detected   | 9890.8  | Detected   | Ttc1           | 0.850689786 | 0.90670692 | 0.84681507 | 0.9025771 |
| A_52_P5220 | 1142.3  | Detected   | 1485.9  | Detected   | 1002.3  | Detected   | 971.6   | Detected   | Alkbh1         | 0.85056465  | 0.87744025 | 0.6538798  | 0.6745407 |
| A_55_P1994 | 91      | Detected   | 91.8    | Detected   | 108.2   | Detected   | 77.4    | Detected   | Zbtb42         | 0.850549451 | 1.18901099 | 0.84313725 | 1.1786492 |
| A_51_P4264 | 6596.7  | Detected   | 6699.7  | Detected   | 6748.4  | Detected   | 5610.7  | Detected   | Ube2d2a        | 0.850531326 | 1.02299635 | 0.83745541 | 1.007269  |
| A_55_P2027 | 55060.4 | Detected   | 65070.5 | Detected   | 58987.9 | Detected   | 46827.1 | Detected   | Cdc34          | 0.85046785  | 1.07133076 | 0.71963639 | 0.9065229 |

|            |                   |                   |                   |                   |               |             |            |            |           |
|------------|-------------------|-------------------|-------------------|-------------------|---------------|-------------|------------|------------|-----------|
| A_55_P2032 | 372.4 Detected    | 333.7 Detected    | 411.5 Detected    | 316.7 Detected    | B230307C23Rik | 0.850429646 | 1.10499463 | 0.94905604 | 1.2331435 |
| A_55_P2011 | 38.1 Detected     | 25.4 Detected     | 13.5 Not Detect   | 32.4 Not Detect   | Neur11b       | 0.850393701 | 0.35433071 | 1.27559055 | 0.5314961 |
| A_65_P1145 | 2441.7 Detected   | 2935.4 Detected   | 2249.7 Detected   | 2076.4 Detected   | Pphln1        | 0.850391121 | 0.92136626 | 0.70736527 | 0.7664032 |
| A_55_P2110 | 20378.3 Detected  | 19111.8 Detected  | 23953.6 Detected  | 17328.7 Detected  | Bloc1s1       | 0.850350618 | 1.17544643 | 0.90670162 | 1.2533409 |
| A_52_P5203 | 16.7 Detected     | 11 Not Detect     | 11.4 Not Detect   | 14.2 Not Detect   | A130023I24Rik | 0.850299401 | 0.68263473 | 1.29090909 | 1.0363636 |
| A_55_P2062 | 6258.3 Detected   | 2481.4 Detected   | 12118.6 Detected  | 5321 Detected     | Gstm1         | 0.850230893 | 1.93640445 | 2.14435399 | 4.8837753 |
| A_52_P5031 | 373.2 Detected    | 364.3 Detected    | 405.6 Detected    | 317.3 Detected    | Zfp957        | 0.850214362 | 1.08681672 | 0.87098545 | 1.1133681 |
| A_52_P5749 | 130.8 Detected    | 83.9 Detected     | 265.8 Detected    | 111.2 Detected    | 1500026H17Rik | 0.850152905 | 2.03211009 | 1.32538737 | 3.1680572 |
| A_55_P2166 | 2075.3 Detected   | 1466.7 Detected   | 2219.6 Detected   | 1764.2 Detected   | Strbp         | 0.850093962 | 1.06953212 | 1.2028363  | 1.5133292 |
| A_52_P1315 | 10058.2 Detected  | 13660.3 Detected  | 7665.2 Detected   | 8549.8 Detected   | Ajuba         | 0.850032809 | 0.76208467 | 0.62588669 | 0.5611297 |
| A_51_P2476 | 20 Detected       | 23.5 Detected     | 11 Not Detect     | 17 Not Detect     | Gpr97         | 0.85        | 0.55       | 0.72340426 | 0.4680851 |
| A_55_P2386 | 8739.3 Detected   | 5830 Detected     | 7563 Detected     | 7428.1 Detected   | Cep63         | 0.8499651   | 0.86540112 | 1.27411664 | 1.2972556 |
| A_66_P1407 | 320049.4 Detected | 296104.1 Detected | 333702.7 Detected | 272009.8 Detected | Rps10         | 0.849899422 | 1.04265998 | 0.91862896 | 1.1269776 |
| A_65_P0917 | 2855 Detected     | 2819.2 Detected   | 2460.2 Detected   | 2426.3 Detected   | Strn3         | 0.849842382 | 0.86171629 | 0.86063422 | 0.8726589 |
| A_55_P1984 | 53211.1 Detected  | 50533.7 Detected  | 50391.4 Detected  | 45220.6 Detected  | Ppp1r14b      | 0.849833963 | 0.94700918 | 0.89486026 | 0.9971841 |
| A_51_P4036 | 4007.4 Detected   | 3768.3 Detected   | 2796.3 Detected   | 3405.6 Detected   | Smad7         | 0.849827819 | 0.6977841  | 0.9037497  | 0.7420588 |
| A_55_P2116 | 241.7 Detected    | 155.2 Detected    | 200.9 Detected    | 205.4 Detected    | Myof          | 0.849813819 | 0.8311957  | 1.32345361 | 1.2944588 |
| A_55_P1967 | 46992.8 Detected  | 46432 Detected    | 39269.5 Detected  | 39925 Detected    | Ppp1r3b       | 0.849598236 | 0.83564929 | 0.85985958 | 0.8457422 |
| A_52_P5304 | 254.6 Detected    | 182.2 Detected    | 227.7 Detected    | 216.3 Detected    | Mbtps2        | 0.84956795  | 0.89434407 | 1.18715697 | 1.2497256 |
| A_55_P2081 | 171810.3 Detected | 145919.4 Detected | 159148.3 Detected | 145962.4 Detected | Rps4x         | 0.849555585 | 0.92630244 | 1.00029468 | 1.090659  |
| A_55_P2006 | 31895.6 Detected  | 29246.3 Detected  | 31374.3 Detected  | 27084.4 Detected  | Eif4e2        | 0.849157878 | 0.98365605 | 0.92607954 | 1.0727613 |
| A_52_P5830 | 28.5 Detected     | 34.8 Detected     | 30.1 Detected     | 24.2 Not Detect   | Gpatch11      | 0.849122807 | 1.05614035 | 0.6954023  | 0.8649425 |
| A_55_P2168 | 2093.8 Detected   | 1360.7 Detected   | 1171 Detected     | 1777.8 Detected   | Azi1          | 0.849078231 | 0.55927023 | 1.3065334  | 0.8605865 |
| A_52_P2865 | 738.4 Detected    | 1232.5 Detected   | 975.7 Detected    | 626.9 Detected    | Pvrl1         | 0.848997833 | 1.32137053 | 0.50864097 | 0.791643  |
| A_55_P2183 | 422.4 Detected    | 386.3 Detected    | 331.9 Detected    | 358.6 Detected    | Sh3bp1        | 0.848958333 | 0.78574811 | 0.92829407 | 0.8591768 |
| A_51_P1848 | 309.8 Detected    | 143.7 Detected    | 255.7 Detected    | 263 Detected      | Pfkfb2        | 0.848934797 | 0.82537121 | 1.83020181 | 1.7794015 |
| A_55_P2117 | 13.9 Not Detect   | 21.3 Detected     | 27 Detected       | 11.8 Not Detect   | Apoc3         | 0.848920863 | 1.94244604 | 0.55399061 | 1.2676056 |
| A_51_P4690 | 60644 Detected    | 65363.7 Detected  | 65767.1 Detected  | 51480.2 Detected  | Ehd1          | 0.848891894 | 1.08447827 | 0.78759617 | 1.0061716 |
| A_52_P2898 | 2136.2 Detected   | 2097.5 Detected   | 1447.6 Detected   | 1813.4 Detected   | Prdm4         | 0.848890553 | 0.67765191 | 0.86455304 | 0.6901549 |
| A_55_P2178 | 1060 Detected     | 964 Detected      | 1043.5 Detected   | 899.8 Detected    | Wdr45b        | 0.848867925 | 0.98443396 | 0.93340249 | 1.0824689 |
| A_55_P2054 | 37.7 Detected     | 178.1 Detected    | 35.2 Detected     | 32 Not Detect     | Sema3a        | 0.848806366 | 0.933687   | 0.17967434 | 0.1976418 |
| A_51_P1212 | 4006.8 Detected   | 4123.9 Detected   | 3947.2 Detected   | 3400.9 Detected   | Cenpo         | 0.84878207  | 0.98512529 | 0.82468052 | 0.9571522 |
| A_55_P2040 | 7120.3 Detected   | 5966.1 Detected   | 6108.1 Detected   | 6042.8 Detected   | Ptp4a1        | 0.848672107 | 0.85784307 | 1.01285597 | 1.0238011 |
| A_55_P2145 | 4575.1 Detected   | 4810.7 Detected   | 4362.7 Detected   | 3882.1 Detected   | Thoc7         | 0.848527901 | 0.95357479 | 0.80697196 | 0.9068743 |
| A_55_P1998 | 142.6 Detected    | 121.4 Detected    | 85.7 Detected     | 121 Detected      | Rab23         | 0.848527349 | 0.60098177 | 0.99670511 | 0.7059308 |
| A_55_P2093 | 4890.6 Detected   | 3627.5 Detected   | 2417.9 Detected   | 4149.8 Detected   | Mex3d         | 0.848525743 | 0.49439742 | 1.14398346 | 0.6665472 |
| A_52_P5533 | 4064.3 Detected   | 2144.3 Detected   | 2572.9 Detected   | 3448.4 Detected   | Snrk          | 0.84846099  | 0.63304874 | 1.6081705  | 1.1998787 |
| A_65_P0706 | 9050.3 Detected   | 4751.4 Detected   | 8453.4 Detected   | 7677.8 Detected   | Serf2         | 0.848347569 | 0.93404639 | 1.61590268 | 1.7791388 |
| A_52_P7724 | 10993.6 Detected  | 6641.1 Detected   | 8882.9 Detected   | 9325.8 Detected   | Snx8          | 0.848293553 | 0.80800648 | 1.40425532 | 1.3375646 |
| A_51_P4675 | 502.8 Detected    | 552.4 Detected    | 368 Detected      | 426.5 Detected    | Tec           | 0.848249801 | 0.73190135 | 0.77208545 | 0.6661839 |



|            |          |            |         |            |          |            |          |            |               |             |            |            |           |
|------------|----------|------------|---------|------------|----------|------------|----------|------------|---------------|-------------|------------|------------|-----------|
| A_51_P3880 | 34880.9  | Detected   | 34239.9 | Detected   | 27011.2  | Detected   | 29586.6  | Detected   | Snrpb2        | 0.848217793 | 0.77438369 | 0.86409715 | 0.7888808 |
| A_55_P2061 | 1137.9   | Detected   | 569.6   | Detected   | 418.8    | Detected   | 965      | Detected   | Mthfs         | 0.848053432 | 0.3680464  | 1.69417135 | 0.7352528 |
| A_55_P2110 | 4907     | Detected   | 3761.8  | Detected   | 3511.3   | Detected   | 4161.1   | Detected   | Atp6ap1       | 0.847992664 | 0.71556959 | 1.10614599 | 0.9334095 |
| A_52_P6443 | 7573.3   | Detected   | 5458.4  | Detected   | 7002     | Detected   | 6421.5   | Detected   | Zfp106        | 0.847913063 | 0.92456393 | 1.17644365 | 1.2827935 |
| A_55_P2056 | 31780.1  | Detected   | 27733.6 | Detected   | 31249.9  | Detected   | 26946.6  | Detected   | Siva1         | 0.847907968 | 0.9833166  | 0.97162287 | 1.1267884 |
| A_51_P1616 | 10486.4  | Detected   | 8914.3  | Detected   | 12741.6  | Detected   | 8891.5   | Detected   | Coq7          | 0.847907766 | 1.21505951 | 0.99744231 | 1.4293439 |
| A_66_P1214 | 23379.8  | Detected   | 24368.5 | Detected   | 22532.3  | Detected   | 19823.9  | Detected   | Cenpa         | 0.847907168 | 0.96375076 | 0.81350514 | 0.9246486 |
| A_55_P2167 | 13993.1  | Detected   | 10990.6 | Detected   | 18455.9  | Detected   | 11864.7  | Detected   | Paip2         | 0.847896463 | 1.31892861 | 1.0795316  | 1.6792441 |
| A_52_P3299 | 4571.9   | Detected   | 4080.6  | Detected   | 5067.5   | Detected   | 3876.2   | Detected   | Prrg2         | 0.847831317 | 1.10840132 | 0.94990933 | 1.2418517 |
| A_55_P1967 | 2158.3   | Detected   | 1880.8  | Detected   | 3666     | Detected   | 1829.8   | Detected   | Dcbld1        | 0.847796877 | 1.69855905 | 0.97288388 | 1.9491706 |
| A_55_P2121 | 17499.9  | Detected   | 14294.2 | Detected   | 13766.3  | Detected   | 14835.3  | Detected   | Gm4907        | 0.847736273 | 0.78665021 | 1.03785451 | 0.9630689 |
| A_55_P2250 | 36113.4  | Detected   | 30632.9 | Detected   | 28533.4  | Detected   | 30614.2  | Detected   | Taok1         | 0.847724113 | 0.79010561 | 0.99938955 | 0.9314626 |
| A_55_P2144 | 385.4    | Detected   | 281.9   | Detected   | 352.4    | Detected   | 326.7    | Detected   | 9030025P20Rik | 0.847690711 | 0.91437468 | 1.1589216  | 1.2500887 |
| A_55_P2161 | 2420.1   | Detected   | 2199.4  | Detected   | 1971.3   | Detected   | 2051.4   | Detected   | Zfp133-ps     | 0.847650924 | 0.81455312 | 0.93270892 | 0.8962899 |
| A_55_P1965 | 908.4    | Detected   | 426.1   | Detected   | 411.9    | Detected   | 770      | Detected   | Havcr2        | 0.84764421  | 0.45343461 | 1.80708754 | 0.9666745 |
| A_51_P4925 | 3442.6   | Detected   | 2859.7  | Detected   | 3158.5   | Detected   | 2917.9   | Detected   | Fbxo42        | 0.847586127 | 0.91747516 | 1.02035179 | 1.1044865 |
| A_55_P2035 | 56.4     | Detected   | 37      | Detected   | 69.6     | Detected   | 47.8     | Not Detect | Glec4n        | 0.84751773  | 1.23404255 | 1.29189189 | 1.8810811 |
| A_55_P2017 | 17.7     | Detected   | 14.3    | Not Detect | 12.6     | Not Detect | 15       | Not Detect | Vmn2r88       | 0.847457627 | 0.71186441 | 1.04895105 | 0.8811189 |
| A_55_P2071 | 553.7    | Detected   | 287.6   | Detected   | 513.5    | Detected   | 469.2    | Detected   | Ncoa3         | 0.847390284 | 0.92739751 | 1.63143255 | 1.7854659 |
| A_52_P2035 | 5552.4   | Detected   | 4027.5  | Detected   | 4788.2   | Detected   | 4704.8   | Detected   | Aqr           | 0.847345292 | 0.86236582 | 1.16816884 | 1.1888765 |
| A_55_P2048 | 1162.5   | Detected   | 1097.4  | Detected   | 989.2    | Detected   | 985      | Detected   | Smn1          | 0.847311828 | 0.85092473 | 0.89757609 | 0.9014033 |
| A_55_P2042 | 22809.1  | Detected   | 28895.8 | Detected   | 6919.6   | Detected   | 19325.8  | Detected   | Dpysl3        | 0.847284636 | 0.30337015 | 0.66881    | 0.2394673 |
| A_66_P1249 | 89284.7  | Detected   | 94040.1 | Detected   | 93229.9  | Detected   | 75634    | Detected   | Hspe1         | 0.847110423 | 1.04418674 | 0.80427392 | 0.9913845 |
| A_55_P2102 | 20997.6  | Detected   | 21228.1 | Detected   | 18687.8  | Detected   | 17782.8  | Detected   | Msto1         | 0.846896788 | 0.88999695 | 0.83770097 | 0.8803331 |
| A_55_P2032 | 62.7     | Detected   | 69.3    | Detected   | 79.5     | Detected   | 53.1     | Detected   | Foxp3         | 0.846889952 | 1.26794258 | 0.76623377 | 1.1471861 |
| A_55_P2065 | 75.1     | Detected   | 56.6    | Detected   | 65.2     | Detected   | 63.6     | Detected   | Brwd1         | 0.846870839 | 0.86817577 | 1.12367491 | 1.1519435 |
| A_55_P2112 | 96024.1  | Detected   | 91035.2 | Detected   | 83594.4  | Detected   | 81320    | Detected   | Madd          | 0.846870733 | 0.87055645 | 0.89328084 | 0.9182646 |
| A_51_P1550 | 11.1     | Not Detect | 44.1    | Detected   | 3.4      | Not Detect | 9.4      | Not Detect | Dennd2a       | 0.846846847 | 0.30630631 | 0.21315193 | 0.0770975 |
| A_52_P6798 | 1607     | Detected   | 1560.3  | Detected   | 1690     | Detected   | 1360.7   | Detected   | Rbm22         | 0.846733043 | 1.05164904 | 0.87207588 | 1.083125  |
| A_55_P2066 | 300.1    | Detected   | 190.6   | Detected   | 230.3    | Detected   | 254.1    | Detected   | Agbl5         | 0.846717761 | 0.76741086 | 1.33315845 | 1.2082896 |
| A_55_P2089 | 15       | Detected   | 12      | Not Detect | 15.3     | Not Detect | 12.7     | Not Detect | Gm11570       | 0.846666667 | 1.02       | 1.05833333 | 1.275     |
| A_52_P3888 | 20.2     | Detected   | 26.8    | Detected   | 10.2     | Not Detect | 17.1     | Not Detect | Sec16b        | 0.846534653 | 0.5049505  | 0.6380597  | 0.380597  |
| A_55_P1974 | 166456.1 | Detected   | 149021  | Detected   | 141635.2 | Detected   | 140909.8 | Detected   | Eif4h         | 0.846528304 | 0.85088621 | 0.94557009 | 0.9504379 |
| A_52_P1924 | 27316.6  | Detected   | 17490.9 | Detected   | 27748.2  | Detected   | 23123.1  | Detected   | Tnfrsf1a      | 0.846485287 | 1.01579992 | 1.32200744 | 1.5864364 |
| A_55_P2025 | 37.1     | Detected   | 38.3    | Detected   | 24       | Detected   | 31.4     | Not Detect | Gcnt2         | 0.846361186 | 0.64690027 | 0.81984334 | 0.6266319 |
| A_51_P4165 | 35138.2  | Detected   | 28916.7 | Detected   | 31205.2  | Detected   | 29739.3  | Detected   | Hdlbp         | 0.846352403 | 0.88807053 | 1.02844723 | 1.0791411 |
| A_55_P2117 | 71085    | Detected   | 62335.6 | Detected   | 61361.8  | Detected   | 60162.8  | Detected   | Rbm3          | 0.846350144 | 0.86321728 | 0.96514351 | 0.9843781 |
| A_51_P1449 | 9175.7   | Detected   | 8926.6  | Detected   | 9723.8   | Detected   | 7765.8   | Detected   | Cops8         | 0.846344148 | 1.05973386 | 0.86996169 | 1.0893061 |
| A_55_P2045 | 3421.3   | Detected   | 3688.4  | Detected   | 2513.2   | Detected   | 2895.5   | Detected   | Stk3          | 0.846315728 | 0.73457458 | 0.78502874 | 0.6813795 |
| A_55_P1997 | 96.3     | Detected   | 86.3    | Detected   | 80.2     | Detected   | 81.5     | Detected   | Diras1        | 0.846313603 | 0.83281412 | 0.94438007 | 0.9293163 |

|            |                   |                   |                   |                  |               |             |            |            |           |
|------------|-------------------|-------------------|-------------------|------------------|---------------|-------------|------------|------------|-----------|
| A_51_P4143 | 52.7 Detected     | 42.9 Detected     | 30.9 Detected     | 44.6 Not Detect  | Mmrrn2        | 0.84629981  | 0.58633776 | 1.03962704 | 0.7202797 |
| A_55_P2024 | 141717.2 Detected | 127290 Detected   | 139448.5 Detected | 119931 Detected  | Rpl5          | 0.846269895 | 0.98399136 | 0.94218713 | 1.0955181 |
| A_51_P2135 | 1215.8 Detected   | 1589.2 Detected   | 1289.6 Detected   | 1028.8 Detected  | Nrde2         | 0.846191808 | 1.06070077 | 0.64736975 | 0.8114775 |
| A_52_P2659 | 275 Detected      | 275.9 Detected    | 228 Detected      | 232.7 Detected   | Arfrp1        | 0.846181818 | 0.82909091 | 0.84342153 | 0.8263864 |
| A_55_P1978 | 248.8 Detected    | 261.3 Detected    | 261.1 Detected    | 210.5 Detected   | Tmem170b      | 0.846061093 | 1.0494373  | 0.80558745 | 0.9992346 |
| A_51_P2556 | 93221.3 Detected  | 112609.7 Detected | 54402.3 Detected  | 78867.2 Detected | Mfge8         | 0.846021242 | 0.58358229 | 0.70035885 | 0.4831049 |
| A_55_P2026 | 220.1 Detected    | 160.2 Detected    | 180.5 Detected    | 186.2 Detected   | Usp31         | 0.8459791   | 0.82008178 | 1.16229713 | 1.1267166 |
| A_66_P1344 | 148 Detected      | 114.2 Detected    | 123.1 Detected    | 125.2 Detected   | Pcnx13        | 0.845945946 | 0.83175676 | 1.09632224 | 1.0779335 |
| A_52_P1010 | 214.7 Detected    | 136.1 Detected    | 158.6 Detected    | 181.6 Detected   | 2900056M20Rik | 0.845831393 | 0.73870517 | 1.33431301 | 1.1653196 |
| A_52_P3553 | 1683.6 Detected   | 1402.7 Detected   | 1746.5 Detected   | 1424 Detected    | Dars          | 0.845806605 | 1.03736042 | 1.015185   | 1.2450987 |
| A_55_P1963 | 25829.2 Detected  | 21983.2 Detected  | 26958.3 Detected  | 21846.4 Detected | Gtf3c6        | 0.845802425 | 1.04371409 | 0.99377707 | 1.2263137 |
| A_55_P2056 | 221.6 Detected    | 308.4 Detected    | 216 Detected      | 187.4 Detected   | AF067061      | 0.84566787  | 0.97472924 | 0.6076524  | 0.7003891 |
| A_66_P1351 | 47.3 Detected     | 51.9 Detected     | 42.9 Detected     | 40 Not Detect    | 1700094M24Rik | 0.845665962 | 0.90697674 | 0.77071291 | 0.8265896 |
| A_51_P1562 | 9355.1 Detected   | 7689.6 Detected   | 8294.9 Detected   | 7911.1 Detected  | Zfp511        | 0.845645691 | 0.88667144 | 1.02880514 | 1.0787167 |
| A_55_P1982 | 10634.7 Detected  | 8883.5 Detected   | 9467.2 Detected   | 8992.5 Detected  | Rhbdf1        | 0.845580975 | 0.89021787 | 1.01226994 | 1.0657061 |
| A_55_P2131 | 53.1 Detected     | 27.4 Detected     | 41 Detected       | 44.9 Detected    | Dcaf17        | 0.845574388 | 0.77212806 | 1.63868613 | 1.4963504 |
| A_55_P2394 | 12.3 Not Detect   | 16.6 Not Detect   | 20.9 Detected     | 10.4 Not Detect  | 1700023A20Rik | 0.845528455 | 1.69918699 | 0.62650602 | 1.2590361 |
| A_51_P4465 | 17795.7 Detected  | 6712.6 Detected   | 14204.7 Detected  | 15044.6 Detected | Emp3          | 0.845406475 | 0.79820968 | 2.2412478  | 2.1161249 |
| A_51_P2202 | 1545.6 Detected   | 889.9 Detected    | 1228.9 Detected   | 1306.6 Detected  | Phf1          | 0.845367495 | 0.79509576 | 1.46825486 | 1.3809417 |
| A_55_P2170 | 4808.6 Detected   | 3909.4 Detected   | 5267.3 Detected   | 4064.7 Detected  | Bivm          | 0.845298008 | 1.09539159 | 1.03972477 | 1.3473423 |
| A_52_P5545 | 69.8 Detected     | 70.2 Detected     | 47.1 Detected     | 59 Detected      | Dnajc11       | 0.845272206 | 0.6747851  | 0.84045584 | 0.6709402 |
| A_52_P2577 | 15.5 Detected     | 3.3 Not Detect    | 6.8 Not Detect    | 13.1 Not Detect  | Reg4          | 0.84516129  | 0.43870968 | 3.96969697 | 2.0606061 |
| A_55_P2186 | 198.8 Detected    | 152.8 Detected    | 148.9 Detected    | 168 Detected     | Gm5414        | 0.845070423 | 0.74899396 | 1.09947644 | 0.9744764 |
| A_52_P2376 | 1725 Detected     | 1783 Detected     | 1370.6 Detected   | 1457.7 Detected  | Nup54         | 0.845043478 | 0.79455072 | 0.81755468 | 0.7687044 |
| A_55_P2108 | 7143.9 Detected   | 5743.9 Detected   | 4840.6 Detected   | 6036.9 Detected  | 4930427A07Rik | 0.845042624 | 0.67758507 | 1.05101064 | 0.8427375 |
| A_55_P1971 | 48686.5 Detected  | 34427 Detected    | 47519.1 Detected  | 41141.2 Detected | Ube2l3        | 0.845022748 | 0.9760221  | 1.19502716 | 1.3802858 |
| A_55_P1982 | 451 Detected      | 1151.6 Detected   | 958.5 Detected    | 381.1 Detected   | Gpm6b         | 0.845011086 | 2.12527716 | 0.33093088 | 0.8323203 |
| A_66_P1347 | 116.1 Detected    | 95.8 Detected     | 85.9 Detected     | 98.1 Detected    | Mphosph9      | 0.84496124  | 0.73987941 | 1.02400835 | 0.8966597 |
| A_55_P2124 | 31.6 Detected     | 26.7 Detected     | 27.9 Detected     | 26.7 Not Detect  | LOC101056084  | 0.844936709 | 0.88291139 | 1          | 1.0449438 |
| A_55_P2012 | 47.7 Detected     | 48.3 Detected     | 54 Detected       | 40.3 Not Detect  | Gm10536       | 0.844863732 | 1.13207547 | 0.83436853 | 1.1180124 |
| A_55_P2058 | 5124.6 Detected   | 3639.5 Detected   | 4992.8 Detected   | 4329.4 Detected  | Gm5858        | 0.844826913 | 0.97428092 | 1.18955901 | 1.3718368 |
| A_55_P2351 | 458.8 Detected    | 377.5 Detected    | 368.5 Detected    | 387.6 Detected   | Dhx9          | 0.844812554 | 0.80318221 | 1.02675497 | 0.9761589 |
| A_55_P2167 | 1732.3 Detected   | 1735.9 Detected   | 1401.3 Detected   | 1463.4 Detected  | Cnnm2         | 0.844772845 | 0.80892455 | 0.84302091 | 0.807247  |
| A_51_P2421 | 44226 Detected    | 41545.7 Detected  | 40126.6 Detected  | 37359.8 Detected | Lap3          | 0.844747434 | 0.90730792 | 0.89924589 | 0.9658424 |
| A_55_P2025 | 208 Detected      | 285.1 Detected    | 132.5 Detected    | 175.7 Detected   | Psme2b        | 0.844711538 | 0.63701923 | 0.61627499 | 0.4647492 |
| A_52_P2733 | 4638 Detected     | 2785.4 Detected   | 3620.8 Detected   | 3917.7 Detected  | Ppp2r5c       | 0.84469599  | 0.78068133 | 1.40651253 | 1.299921  |
| A_55_P1989 | 54148.8 Detected  | 41613.5 Detected  | 59709 Detected    | 45738.8 Detected | Eif6          | 0.844687232 | 1.10268372 | 1.09913369 | 1.4348469 |
| A_55_P2117 | 1630.6 Detected   | 1207.8 Detected   | 1188.8 Detected   | 1377.3 Detected  | Zfp937        | 0.844658408 | 0.72905679 | 1.1403378  | 0.9842689 |
| A_51_P3913 | 791 Detected      | 656.9 Detected    | 749.1 Detected    | 668.1 Detected   | Tfap4         | 0.844627054 | 0.94702908 | 1.01704978 | 1.1403562 |
| A_55_P2136 | 159.5 Detected    | 128.7 Detected    | 145.3 Detected    | 134.7 Detected   | Kmt2d         | 0.844514107 | 0.91097179 | 1.04662005 | 1.1289821 |

|            |          |          |         |          |         |          |          |            |               |             |            |            |           |
|------------|----------|----------|---------|----------|---------|----------|----------|------------|---------------|-------------|------------|------------|-----------|
| A_55_P2029 | 12340.4  | Detected | 12044.8 | Detected | 10469.9 | Detected | 10421.6  | Detected   | Tnfrsf9       | 0.844510713 | 0.84842469 | 0.86523645 | 0.8692465 |
| A_55_P2258 | 149.2    | Detected | 89.7    | Detected | 92.6    | Detected | 126      | Detected   | 1810008118Rik | 0.844504021 | 0.62064343 | 1.40468227 | 1.03233   |
| A_51_P4367 | 423      | Detected | 334.1   | Detected | 289.2   | Detected | 357.2    | Detected   | Olf1537       | 0.844444444 | 0.68368794 | 1.06914098 | 0.8656091 |
| A_55_P2008 | 142.7    | Detected | 117.7   | Detected | 140.7   | Detected | 120.5    | Detected   | Zfp952        | 0.844428872 | 0.98598458 | 1.02378929 | 1.1954121 |
| A_52_P5639 | 5208     | Detected | 4220.7  | Detected | 4867.1  | Detected | 4397.5   | Detected   | Psmg4         | 0.84437404  | 0.93454301 | 1.04188879 | 1.15315   |
| A_55_P1979 | 51.4     | Detected | 38.8    | Detected | 49.3    | Detected | 43.4     | Not Detect | Wdr62         | 0.844357977 | 0.95914397 | 1.1185567  | 1.2706186 |
| A_51_P3086 | 1942.7   | Detected | 1584.1  | Detected | 1698.8  | Detected | 1640.3   | Detected   | Mcur1         | 0.844340351 | 0.87445308 | 1.03547756 | 1.072407  |
| A_55_P2025 | 3465.6   | Detected | 2698.2  | Detected | 4802.3  | Detected | 2926.1   | Detected   | Adam8         | 0.844327101 | 1.38570522 | 1.08446372 | 1.7798162 |
| A_55_P1978 | 1758     | Detected | 1137.2  | Detected | 1338.8  | Detected | 1484.3   | Detected   | Rp2h          | 0.844311718 | 0.76154721 | 1.30522336 | 1.1772775 |
| A_55_P2138 | 44.3     | Detected | 37.3    | Detected | 41      | Detected | 37.4     | Not Detect | Rfx3          | 0.844243792 | 0.9255079  | 1.00268097 | 1.0991957 |
| A_51_P3531 | 21326.1  | Detected | 21728.8 | Detected | 21081.2 | Detected | 18002.5  | Detected   | Fam98a        | 0.844153408 | 0.98851642 | 0.82850871 | 0.9701962 |
| A_55_P2010 | 4581.8   | Detected | 3325.1  | Detected | 3553.5  | Detected | 3867.6   | Detected   | Cnn2          | 0.844122397 | 0.77556855 | 1.16315299 | 1.0686897 |
| A_55_P2013 | 3974.5   | Detected | 1485.7  | Detected | 2639.5  | Detected | 3354.9   | Detected   | Renbp         | 0.844106177 | 0.66410869 | 2.25812748 | 1.7766036 |
| A_52_P4876 | 673.5    | Detected | 847     | Detected | 464.6   | Detected | 568.5    | Detected   | Rassf8        | 0.844097996 | 0.68982925 | 0.67119244 | 0.5485242 |
| A_51_P3573 | 127453.7 | Detected | 84590.1 | Detected | 135598  | Detected | 107579.4 | Detected   | Clic1         | 0.844066512 | 1.06390007 | 1.27177294 | 1.6030008 |
| A_55_P2423 | 40.4     | Detected | 56.2    | Detected | 27.6    | Detected | 34.1     | Not Detect | 5730433K22Rik | 0.844059406 | 0.68316832 | 0.60676157 | 0.4911032 |
| A_55_P1956 | 66243.3  | Detected | 58966.2 | Detected | 55089.9 | Detected | 55909.7  | Detected   | Timm17a       | 0.844005356 | 0.83162976 | 0.94816522 | 0.9342623 |
| A_52_P5733 | 9570.9   | Detected | 3701.2  | Detected | 6333.5  | Detected | 8077.2   | Detected   | Sbsn          | 0.843933172 | 0.6617455  | 2.18231925 | 1.7112018 |
| A_55_P2063 | 6566.8   | Detected | 5558.5  | Detected | 5750.1  | Detected | 5541.2   | Detected   | Dusp3         | 0.84382043  | 0.87563197 | 0.99688765 | 1.0344697 |
| A_52_P5562 | 2020.2   | Detected | 1529.3  | Detected | 1479.2  | Detected | 1704.5   | Detected   | Arih1         | 0.843728344 | 0.73220473 | 1.11456222 | 0.9672399 |
| A_55_P1983 | 79.3     | Detected | 157.1   | Detected | 40      | Detected | 66.9     | Detected   | Pstpip2       | 0.843631778 | 0.50441362 | 0.42584341 | 0.2546149 |
| A_52_P5501 | 20612.3  | Detected | 15562.2 | Detected | 22811.5 | Detected | 17389.1  | Detected   | Urm1          | 0.843627349 | 1.10669358 | 1.11739343 | 1.4658275 |
| A_55_P1979 | 18053    | Detected | 13928.1 | Detected | 18853.1 | Detected | 15229.8  | Detected   | Prdx4         | 0.843616019 | 1.0443195  | 1.09345855 | 1.3536017 |
| A_55_P1960 | 296      | Detected | 261.4   | Detected | 24.5    | Detected | 249.7    | Detected   | Thsd7a        | 0.843581081 | 0.08277027 | 0.95524101 | 0.0937261 |
| A_55_P2003 | 34.5     | Detected | 29.3    | Detected | 20.1    | Detected | 29.1     | Not Detect | Fkbp8         | 0.843478261 | 0.5826087  | 0.99317406 | 0.6860068 |
| A_55_P2012 | 6589.9   | Detected | 5473.9  | Detected | 5974.3  | Detected | 5558.2   | Detected   | Sfxn2         | 0.843442237 | 0.90658432 | 1.01540035 | 1.0914156 |
| A_51_P4683 | 37108    | Detected | 34453.9 | Detected | 39116.4 | Detected | 31298.4  | Detected   | Psmb7         | 0.843440767 | 1.0541231  | 0.90841385 | 1.1353258 |
| A_51_P4484 | 10552.1  | Detected | 7471.9  | Detected | 10667.8 | Detected | 8899.6   | Detected   | Mea1          | 0.843396101 | 1.01096464 | 1.1910759  | 1.4277225 |
| A_55_P2173 | 623.3    | Detected | 468.3   | Detected | 652.8   | Detected | 525.6    | Detected   | Zfp931        | 0.84325365  | 1.04732873 | 1.12235746 | 1.3939782 |
| A_51_P3734 | 13142.3  | Detected | 10266.6 | Detected | 10454.8 | Detected | 11081.9  | Detected   | Brcc3         | 0.843223789 | 0.79550764 | 1.07941285 | 1.0183313 |
| A_55_P1995 | 8797.2   | Detected | 4967.4  | Detected | 10439.6 | Detected | 7417.5   | Detected   | Gm14288       | 0.843166007 | 1.18669577 | 1.4932359  | 2.1016226 |
| A_55_P2051 | 71.4     | Detected | 52.9    | Detected | 48      | Detected | 60.2     | Detected   | Spin1         | 0.843137255 | 0.67226891 | 1.13799622 | 0.9073724 |
| A_55_P1964 | 945.4    | Detected | 578.6   | Detected | 716.8   | Detected | 797.1    | Detected   | Stam2         | 0.843135181 | 0.75819759 | 1.37763567 | 1.2388524 |
| A_55_P2195 | 1923.4   | Detected | 1557.2  | Detected | 2215    | Detected | 1621.5   | Detected   | Rabepk        | 0.84303837  | 1.15160653 | 1.04129206 | 1.4224249 |
| A_55_P2151 | 96003.1  | Detected | 78783.6 | Detected | 83043.7 | Detected | 80931    | Detected   | Dynl1c        | 0.843004028 | 0.86501061 | 1.02725694 | 1.0540734 |
| A_52_P2574 | 818.8    | Detected | 560.8   | Detected | 671.9   | Detected | 690.2    | Detected   | Prr12         | 0.842940889 | 0.82059111 | 1.2307418  | 1.1981098 |
| A_55_P2099 | 717.6    | Detected | 782.4   | Detected | 586.2   | Detected | 604.8    | Detected   | Nol9          | 0.842809365 | 0.81688963 | 0.77300613 | 0.7492331 |
| A_55_P2000 | 57.2     | Detected | 56      | Detected | 70.5    | Detected | 48.2     | Detected   | Ccdc151       | 0.842657343 | 1.23251748 | 0.86071429 | 1.2589286 |
| A_55_P1976 | 1607.9   | Detected | 1395.8  | Detected | 1499    | Detected | 1354.9   | Detected   | Smurf2        | 0.842651906 | 0.93227191 | 0.97069781 | 1.0739361 |
| A_66_P1328 | 3217.7   | Detected | 2972    | Detected | 2756.3  | Detected | 2711.4   | Detected   | Baz1b         | 0.842651583 | 0.85660565 | 0.91231494 | 0.9274226 |

|            |         |          |         |          |         |          |         |            |               |             |            |            |           |
|------------|---------|----------|---------|----------|---------|----------|---------|------------|---------------|-------------|------------|------------|-----------|
| A_52_P6243 | 12957.8 | Detected | 10629.1 | Detected | 14102.9 | Detected | 10916.2 | Detected   | Aamp          | 0.84244239  | 1.08837148 | 1.02701075 | 1.3268198 |
| A_51_P3755 | 60.9    | Detected | 65.5    | Detected | 44.5    | Detected | 51.3    | Detected   | Myoc          | 0.842364532 | 0.73070608 | 0.78320611 | 0.6793893 |
| A_55_P2076 | 6178.5  | Detected | 5187.7  | Detected | 5587    | Detected | 5203.8  | Detected   | Rbm12         | 0.842243263 | 0.90426479 | 1.00310349 | 1.0769705 |
| A_51_P3871 | 546.2   | Detected | 549.5   | Detected | 224.3   | Detected | 460     | Detected   | Zfp462        | 0.842182351 | 0.41065544 | 0.83712466 | 0.4081893 |
| A_55_P1993 | 28438.9 | Detected | 20893.5 | Detected | 28358.4 | Detected | 23949.8 | Detected   | Oaz2          | 0.84214931  | 0.99716937 | 1.14627994 | 1.3572834 |
| A_52_P6571 | 5598.1  | Detected | 3747.8  | Detected | 5521.3  | Detected | 4714.2  | Detected   | LOC101056031  | 0.842107143 | 0.98628106 | 1.25785794 | 1.473211  |
| A_55_P2031 | 4263.2  | Detected | 5004    | Detected | 2884.4  | Detected | 3590    | Detected   | Efna1         | 0.842090448 | 0.67658097 | 0.71742606 | 0.5764189 |
| A_55_P2007 | 31      | Detected | 27.2    | Detected | 23.5    | Detected | 26.1    | Not Detect | Cryaa         | 0.841935484 | 0.75806452 | 0.95955882 | 0.8639706 |
| A_66_P1060 | 1972.5  | Detected | 1842.7  | Detected | 1372.4  | Detected | 1660.2  | Detected   | Kif3a         | 0.841673004 | 0.69576679 | 0.90096055 | 0.7447767 |
| A_55_P1993 | 11563.4 | Detected | 9849    | Detected | 11041.2 | Detected | 9731.8  | Detected   | Nsa2          | 0.841603681 | 0.95484027 | 0.98810031 | 1.1210478 |
| A_66_P1041 | 307.4   | Detected | 213.2   | Detected | 265.8   | Detected | 258.7   | Detected   | Homer1        | 0.841574496 | 0.86467144 | 1.21341463 | 1.2467167 |
| A_55_P2039 | 5628.2  | Detected | 4793.9  | Detected | 4511.4  | Detected | 4736.5  | Detected   | Zfp664        | 0.841565687 | 0.80157066 | 0.98802645 | 0.9410709 |
| A_55_P2175 | 296     | Detected | 247.7   | Detected | 225.3   | Detected | 249.1   | Detected   | Stxbp4        | 0.841554054 | 0.76114865 | 1.005652   | 0.909568  |
| A_55_P2015 | 9037.5  | Detected | 8374.6  | Detected | 9305.7  | Detected | 7605.2  | Detected   | Dctn4         | 0.841515906 | 1.02967635 | 0.90812696 | 1.1111814 |
| A_55_P1973 | 3731.7  | Detected | 2966.1  | Detected | 3049.8  | Detected | 3140.2  | Detected   | Mapk9         | 0.841493153 | 0.81726827 | 1.0586966  | 1.0282189 |
| A_55_P2002 | 138.1   | Detected | 102.7   | Detected | 89.2    | Detected | 116.2   | Detected   | Dzip1         | 0.841419261 | 0.64590876 | 1.13145083 | 0.8685492 |
| A_55_P2016 | 547.3   | Detected | 554.2   | Detected | 348.3   | Detected | 460.5   | Detected   | Tpst1         | 0.841403252 | 0.63639686 | 0.83092746 | 0.6284735 |
| A_51_P3306 | 5056.5  | Detected | 4221.3  | Detected | 4447    | Detected | 4254.4  | Detected   | Zfp119b       | 0.841372491 | 0.87946208 | 1.00784119 | 1.0534669 |
| A_51_P3331 | 694     | Detected | 223.4   | Detected | 642.8   | Detected | 583.9   | Detected   | Aox1          | 0.841354467 | 0.92622478 | 2.6136974  | 2.87735   |
| A_55_P2038 | 20.8    | Detected | 27.6    | Detected | 17.4    | Detected | 17.5    | Not Detect | Fbxo47        | 0.841346154 | 0.83653846 | 0.63405797 | 0.6304348 |
| A_51_P3469 | 609.4   | Detected | 673.2   | Detected | 424.3   | Detected | 512.7   | Detected   | Lepre1        | 0.84131933  | 0.69625862 | 0.76158645 | 0.6302733 |
| A_52_P2199 | 308.7   | Detected | 350.8   | Detected | 324.4   | Detected | 259.7   | Detected   | Epc1          | 0.841269841 | 1.05085844 | 0.74030787 | 0.9247434 |
| A_51_P1165 | 19768   | Detected | 14425.2 | Detected | 16108.1 | Detected | 16626.7 | Detected   | Ccdc22        | 0.841091663 | 0.81485735 | 1.15261487 | 1.1166639 |
| A_55_P2426 | 629.2   | Detected | 405.5   | Detected | 507.1   | Detected | 529.2   | Detected   | Scaper        | 0.841068023 | 0.80594406 | 1.30505549 | 1.2505549 |
| A_55_P1952 | 22      | Detected | 25.3    | Detected | 28      | Detected | 18.5    | Not Detect | D630023F18Rik | 0.840909091 | 1.27272727 | 0.7312253  | 1.1067194 |
| A_52_P3506 | 5625.9  | Detected | 3013.7  | Detected | 6036.1  | Detected | 4730.8  | Detected   | Pygb          | 0.840896568 | 1.07291278 | 1.56976474 | 2.0028868 |
| A_55_P2395 | 55.3    | Detected | 48.9    | Detected | 50.3    | Detected | 46.5    | Not Detect | 2810427A07Rik | 0.840867993 | 0.90958409 | 0.95092025 | 1.0286299 |
| A_52_P4646 | 1775.2  | Detected | 1683.1  | Detected | 1769.1  | Detected | 1492.7  | Detected   | Nme7          | 0.840863001 | 0.99656377 | 0.88687541 | 1.0510962 |
| A_52_P2066 | 9584.8  | Detected | 7704.4  | Detected | 9554.3  | Detected | 8059.5  | Detected   | Adss          | 0.840862616 | 0.99681788 | 1.04609055 | 1.2401095 |
| A_66_P1045 | 496.8   | Detected | 420.8   | Detected | 435.6   | Detected | 417.7   | Detected   | Inpp1         | 0.840780998 | 0.87681159 | 0.99263308 | 1.0351711 |
| A_51_P5170 | 7461.4  | Detected | 5744    | Detected | 7718.7  | Detected | 6273.4  | Detected   | Sh3gl1        | 0.840780551 | 1.03448415 | 1.09216574 | 1.3437848 |
| A_51_P3129 | 793.2   | Detected | 674.2   | Detected | 675.8   | Detected | 666.9   | Detected   | Zfp346        | 0.840771558 | 0.85199193 | 0.98917235 | 1.0023732 |
| A_55_P2050 | 22.6    | Detected | 31.4    | Detected | 20.5    | Detected | 19      | Not Detect | Nmu           | 0.840707965 | 0.90707965 | 0.60509554 | 0.6528662 |
| A_52_P1261 | 1847.9  | Detected | 1551.1  | Detected | 1404.4  | Detected | 1553.4  | Detected   | Riok1         | 0.840629904 | 0.75999784 | 1.00148282 | 0.905422  |
| A_55_P1955 | 5370.1  | Detected | 4805    | Detected | 4840.1  | Detected | 4513.6  | Detected   | Alad          | 0.840505763 | 0.90130538 | 0.93935484 | 1.0073049 |
| A_66_P1204 | 25.7    | Detected | 24.3    | Detected | 32.6    | Detected | 21.6    | Not Detect | Duoxa1        | 0.840466926 | 1.26848249 | 0.88888889 | 1.3415638 |
| A_55_P2002 | 5093.9  | Detected | 4838    | Detected | 5487.6  | Detected | 4281.2  | Detected   | Inpp5a        | 0.840456232 | 1.07728852 | 0.88491112 | 1.1342704 |
| A_52_P3803 | 6865.2  | Detected | 5348.7  | Detected | 4251.5  | Detected | 5769.5  | Detected   | Papd7         | 0.840397949 | 0.61928276 | 1.07867332 | 0.794866  |
| A_55_P2175 | 71.4    | Detected | 57.6    | Detected | 56      | Detected | 60      | Detected   | Gm10428       | 0.840336134 | 0.78431373 | 1.04166667 | 0.9722222 |
| A_55_P2022 | 14684.1 | Detected | 13228.6 | Detected | 17606.4 | Detected | 12339.3 | Detected   | Gpank1        | 0.840317078 | 1.19901118 | 0.93277444 | 1.3309345 |

|            |          |            |          |          |          |            |          |            |               |             |            |            |           |
|------------|----------|------------|----------|----------|----------|------------|----------|------------|---------------|-------------|------------|------------|-----------|
| A_55_P2092 | 213.4    | Detected   | 165.6    | Detected | 349.2    | Detected   | 179.3    | Detected   | Traf2         | 0.840206186 | 1.63636364 | 1.08272947 | 2.1086957 |
| A_55_P1979 | 41.3     | Detected   | 28.9     | Detected | 45.6     | Detected   | 34.7     | Not Detect | E330009J07Rik | 0.840193705 | 1.10411622 | 1.20069204 | 1.5778547 |
| A_55_P1970 | 2129.7   | Detected   | 2659.8   | Detected | 1315.4   | Detected   | 1789.2   | Detected   | Stard13       | 0.840118327 | 0.61764568 | 0.67268216 | 0.4945485 |
| A_51_P2344 | 10259.6  | Detected   | 9498.5   | Detected | 10594.7  | Detected   | 8618.3   | Detected   | Gpn1          | 0.840023003 | 1.03266209 | 0.90733274 | 1.1154077 |
| A_52_P5189 | 28685.4  | Detected   | 31475.9  | Detected | 17411.8  | Detected   | 24096    | Detected   | Epha2         | 0.840009203 | 0.60699171 | 0.76553808 | 0.5531788 |
| A_52_P8110 | 158.6    | Detected   | 140.6    | Detected | 164.6    | Detected   | 133.2    | Detected   | Ipmk          | 0.839848676 | 1.03783102 | 0.94736842 | 1.170697  |
| A_55_P2138 | 942      | Detected   | 713.7    | Detected | 647      | Detected   | 791.1    | Detected   | Atxn7I3       | 0.839808917 | 0.68683652 | 1.10844893 | 0.9065434 |
| A_55_P1979 | 5803.9   | Detected   | 4993.9   | Detected | 4851.8   | Detected   | 4873.8   | Detected   | Txndc9        | 0.839745688 | 0.83595513 | 0.97595066 | 0.9715453 |
| A_51_P5048 | 15.6     | Not Detect | 31.6     | Detected | 14.2     | Not Detect | 13.1     | Not Detect | Brinp2        | 0.83974359  | 0.91025641 | 0.41455696 | 0.4493671 |
| A_55_P2130 | 24239    | Detected   | 17348.6  | Detected | 23019.8  | Detected   | 20352.6  | Detected   | Smc3          | 0.839663352 | 0.9497009  | 1.17315518 | 1.3268967 |
| A_52_P2424 | 534.3    | Detected   | 469.3    | Detected | 440.4    | Detected   | 448.6    | Detected   | Fam149b       | 0.839603219 | 0.82425604 | 0.95589175 | 0.9384189 |
| A_52_P6559 | 1651.9   | Detected   | 1314.8   | Detected | 1003.5   | Detected   | 1386.9   | Detected   | BC030336      | 0.839578667 | 0.60748229 | 1.05483724 | 0.763234  |
| A_55_P1961 | 13276.1  | Detected   | 10484.5  | Detected | 11971.1  | Detected   | 11145.2  | Detected   | Pcdhga9       | 0.839493526 | 0.90170306 | 1.06301683 | 1.1417903 |
| A_52_P6798 | 6097.4   | Detected   | 4235.7   | Detected | 5642.7   | Detected   | 5118.4   | Detected   | Lcmt2         | 0.839439761 | 0.92542723 | 1.20839531 | 1.3321765 |
| A_52_P1505 | 4206.6   | Detected   | 3894.2   | Detected | 4522.6   | Detected   | 3531.1   | Detected   | Ndufaf6       | 0.839419008 | 1.07512005 | 0.90675877 | 1.1613682 |
| A_55_P2006 | 583.3    | Detected   | 514.4    | Detected | 265.8    | Detected   | 489.6    | Detected   | Armxc3        | 0.839362249 | 0.45568318 | 0.95178849 | 0.5167185 |
| A_51_P4370 | 2847.1   | Detected   | 1152     | Detected | 1003.8   | Detected   | 2389.6   | Detected   | Trak1         | 0.839310175 | 0.35256928 | 2.07430556 | 0.8713542 |
| A_52_P2827 | 1881.2   | Detected   | 1458.4   | Detected | 1583.3   | Detected   | 1578.9   | Detected   | Zbtb33        | 0.839304699 | 0.84164363 | 1.08262479 | 1.0856418 |
| A_52_P4135 | 179.2    | Detected   | 190.3    | Detected | 113.2    | Detected   | 150.4    | Detected   | Ikzf2         | 0.839285714 | 0.63169643 | 0.79033106 | 0.5948502 |
| A_55_P2009 | 7705.4   | Detected   | 3337.1   | Detected | 4592     | Detected   | 6466.9   | Detected   | Mapkapk3      | 0.839268565 | 0.5959457  | 1.9378802  | 1.3760451 |
| A_51_P2673 | 4834.9   | Detected   | 4461.3   | Detected | 3568.9   | Detected   | 4057.7   | Detected   | Topors        | 0.839252104 | 0.73815384 | 0.9095331  | 0.7999686 |
| A_55_P1971 | 47.9     | Detected   | 80.2     | Detected | 15.1     | Not Detect | 40.2     | Not Detect | Atp2c2        | 0.839248434 | 0.31524008 | 0.50124688 | 0.1882793 |
| A_52_P8355 | 1907.9   | Detected   | 1284.6   | Detected | 1540.8   | Detected   | 1601.2   | Detected   | Arfgef2       | 0.83924734  | 0.8075895  | 1.24645804 | 1.1994395 |
| A_55_P2077 | 4704.8   | Detected   | 4003.9   | Detected | 4556.2   | Detected   | 3948.4   | Detected   | Cenpl         | 0.839228022 | 0.96841524 | 0.98613851 | 1.1379405 |
| A_52_P2879 | 618.6    | Detected   | 414.2    | Detected | 352.3    | Detected   | 519.1    | Detected   | Tbcel         | 0.839152926 | 0.5695118  | 1.2532593  | 0.8505553 |
| A_55_P2079 | 2748.9   | Detected   | 2973.7   | Detected | 1470.3   | Detected   | 2306.5   | Detected   | Gramd1c       | 0.839062898 | 0.53486849 | 0.77563305 | 0.4944345 |
| A_55_P1972 | 4894.3   | Detected   | 4054     | Detected | 3782.7   | Detected   | 4106.6   | Detected   | Eif4enif1     | 0.839057679 | 0.77287865 | 1.01297484 | 0.9330784 |
| A_52_P5311 | 31426.8  | Detected   | 28809.9  | Detected | 29584.2  | Detected   | 26368    | Detected   | Fkbp3         | 0.839029109 | 0.94136851 | 0.91524094 | 1.0268762 |
| A_52_P1201 | 393.2    | Detected   | 284.3    | Detected | 320.5    | Detected   | 329.9    | Detected   | A530054K11Rik | 0.839013225 | 0.81510682 | 1.16039395 | 1.1273303 |
| A_55_P2186 | 2223.3   | Detected   | 1710.3   | Detected | 1263.2   | Detected   | 1865.3   | Detected   | Atp11c        | 0.838978096 | 0.56816444 | 1.09062738 | 0.7385839 |
| A_55_P2156 | 1262.1   | Detected   | 1488.7   | Detected | 911.5    | Detected   | 1058.8   | Detected   | Tmem39b       | 0.838919262 | 0.72220902 | 0.71122456 | 0.6122792 |
| A_52_P1442 | 3119.5   | Detected   | 2475.1   | Detected | 3536.7   | Detected   | 2616.9   | Detected   | Fam72a        | 0.838884437 | 1.13373938 | 1.05729061 | 1.428912  |
| A_55_P2084 | 1713.6   | Detected   | 1408.5   | Detected | 4590.1   | Detected   | 1437.4   | Detected   | Gcnt1         | 0.838818861 | 2.67862979 | 1.02051828 | 3.2588569 |
| A_55_P1971 | 146221.8 | Detected   | 121927.2 | Detected | 117402.7 | Detected   | 122652.6 | Detected   | Uba1          | 0.838811997 | 0.80290832 | 1.00594945 | 0.9628918 |
| A_55_P1979 | 23038.3  | Detected   | 21155.1  | Detected | 30249.9  | Detected   | 19324.2  | Detected   | Prdx5         | 0.838785848 | 1.31302657 | 0.91345349 | 1.4299105 |
| A_55_P2113 | 49       | Detected   | 46.4     | Detected | 31.3     | Detected   | 41.1     | Not Detect | Star          | 0.83877551  | 0.63877551 | 0.88577586 | 0.674569  |
| A_55_P2047 | 336.1    | Detected   | 334.4    | Detected | 236.1    | Detected   | 281.9    | Detected   | Tec           | 0.838738471 | 0.7024695  | 0.84300239 | 0.7060407 |
| A_52_P6261 | 12.4     | Not Detect | 38.6     | Detected | 3.7      | Not Detect | 10.4     | Not Detect | Gm9895        | 0.838709677 | 0.2983871  | 0.26943005 | 0.0958549 |
| A_55_P2066 | 443.8    | Detected   | 294.7    | Detected | 400      | Detected   | 372.2    | Detected   | Fcho2         | 0.838666066 | 0.90130689 | 1.2629793  | 1.3573125 |
| A_52_P3660 | 1239.6   | Detected   | 1156.9   | Detected | 1148.3   | Detected   | 1039.6   | Detected   | Rpp40         | 0.838657631 | 0.92634721 | 0.89860835 | 0.9925663 |

|            |          |          |          |            |          |            |          |            |               |             |            |            |           |
|------------|----------|----------|----------|------------|----------|------------|----------|------------|---------------|-------------|------------|------------|-----------|
| A_52_P2638 | 400.3    | Detected | 360.5    | Detected   | 415.8    | Detected   | 335.7    | Detected   | Cdc23         | 0.838621034 | 1.03872096 | 0.93120666 | 1.1533981 |
| A_51_P4752 | 6334.9   | Detected | 3445.2   | Detected   | 4729.1   | Detected   | 5311.6   | Detected   | Rnf44         | 0.838466274 | 0.74651534 | 1.54173923 | 1.3726634 |
| A_52_P2778 | 27361    | Detected | 23450.9  | Detected   | 25601    | Detected   | 22937.9  | Detected   | Snrpb         | 0.838342897 | 0.93567487 | 0.97812451 | 1.0916852 |
| A_55_P1958 | 534.9    | Detected | 571.1    | Detected   | 423.8    | Detected   | 448.4    | Detected   | Spata7        | 0.83828753  | 0.79229763 | 0.78515146 | 0.7420767 |
| A_51_P2288 | 1612     | Detected | 1290.3   | Detected   | 1323.7   | Detected   | 1351.3   | Detected   | Zfp72         | 0.838275434 | 0.82115385 | 1.04727583 | 1.0258855 |
| A_55_P2292 | 45841.4  | Detected | 42080.1  | Detected   | 39416.9  | Detected   | 38423    | Detected   | 2310002F09Rik | 0.838172482 | 0.85985376 | 0.91309194 | 0.9367112 |
| A_51_P3956 | 34.6     | Detected | 21.5     | Detected   | 25.7     | Detected   | 29       | Not Detect | Spink10       | 0.838150289 | 0.74277457 | 1.34883721 | 1.1953488 |
| A_55_P2023 | 9457.8   | Detected | 6870.6   | Detected   | 6689.8   | Detected   | 7926.6   | Detected   | Osbpl5        | 0.838101884 | 0.70733151 | 1.15369837 | 0.973685  |
| A_55_P2145 | 1762.2   | Detected | 1609.5   | Detected   | 1608.4   | Detected   | 1476.9   | Detected   | Atg16l1       | 0.838100102 | 0.91272273 | 0.91761417 | 0.9993166 |
| A_66_P1344 | 2228.1   | Detected | 2111.3   | Detected   | 2281.6   | Detected   | 1867.3   | Detected   | Mettl25       | 0.838068309 | 1.02401149 | 0.88443139 | 1.0806612 |
| A_51_P4948 | 575.3    | Detected | 227.7    | Detected   | 675.7    | Detected   | 482.1    | Detected   | Vmac          | 0.837997566 | 1.17451764 | 2.11725955 | 2.9675011 |
| A_55_P2156 | 29671    | Detected | 26527.2  | Detected   | 30212.2  | Detected   | 24864.1  | Detected   | Sox5          | 0.837993327 | 1.01824003 | 0.93730586 | 1.138914  |
| A_55_P2135 | 131192.7 | Detected | 115539.1 | Detected   | 143703   | Detected   | 109934.8 | Detected   | Rps18         | 0.837964307 | 1.0953582  | 0.95149434 | 1.2437608 |
| A_52_P5876 | 11331.7  | Detected | 8456.8   | Detected   | 9188.3   | Detected   | 9495.2   | Detected   | Phf3          | 0.837932526 | 0.81084921 | 1.12278876 | 1.0864984 |
| A_51_P3694 | 247.4    | Detected | 209.7    | Detected   | 209.3    | Detected   | 207.3    | Detected   | Mss51         | 0.837914309 | 0.84599838 | 0.98855508 | 0.9980925 |
| A_66_P1146 | 182.6    | Detected | 158      | Detected   | 162.6    | Detected   | 153      | Detected   | Ndst1         | 0.837897043 | 0.89047097 | 0.96835443 | 1.0291139 |
| A_52_P5633 | 10982.1  | Detected | 9605.5   | Detected   | 12364.9  | Detected   | 9201.2   | Detected   | Smim4         | 0.837836115 | 1.12591399 | 0.95790953 | 1.2872729 |
| A_55_P1955 | 165923   | Detected | 156423.6 | Detected   | 156920.7 | Detected   | 139013.9 | Detected   | Hspd1         | 0.837821761 | 0.94574411 | 0.88870158 | 1.0031779 |
| A_52_P1004 | 68563.8  | Detected | 80467.6  | Detected   | 57403.6  | Detected   | 57443.3  | Detected   | Akr1b3        | 0.837807998 | 0.83722898 | 0.71386869 | 0.7133753 |
| A_52_P2235 | 341.5    | Detected | 230.6    | Detected   | 237.9    | Detected   | 286.1    | Detected   | Brwd1         | 0.837774524 | 0.6966325  | 1.2406765  | 1.0316565 |
| A_55_P2142 | 292.8    | Detected | 257.9    | Detected   | 214.8    | Detected   | 245.3    | Detected   | BC016423      | 0.837773224 | 0.73360656 | 0.95114385 | 0.832881  |
| A_55_P1967 | 5079.1   | Detected | 4977.1   | Detected   | 6091.8   | Detected   | 4254.7   | Detected   | Lpar6         | 0.837687779 | 1.19938572 | 0.85485524 | 1.2239658 |
| A_66_P1189 | 160.8    | Detected | 142.3    | Detected   | 138.1    | Detected   | 134.7    | Detected   | Zfp644        | 0.837686567 | 0.85883085 | 0.94659171 | 0.9704849 |
| A_51_P4682 | 27.1     | Detected | 19.9     | Detected   | 131.9    | Detected   | 22.7     | Not Detect | S100b         | 0.837638376 | 4.86715867 | 1.14070352 | 6.6281407 |
| A_51_P2687 | 3219.9   | Detected | 2224.4   | Detected   | 3933.2   | Detected   | 2696.9   | Detected   | Kptn          | 0.837572595 | 1.22152862 | 1.21241683 | 1.7682072 |
| A_66_P1008 | 27.7     | Detected | 13.2     | Not Detect | 14.4     | Not Detect | 23.2     | Not Detect | D230030E09Rik | 0.837545126 | 0.5198556  | 1.75757576 | 1.0909091 |
| A_51_P4216 | 5522.4   | Detected | 4304.8   | Detected   | 4739.3   | Detected   | 4625.2   | Detected   | Tmem123       | 0.837534405 | 0.85819571 | 1.07442854 | 1.1009338 |
| A_55_P2044 | 3050.8   | Detected | 2247.1   | Detected   | 2810.7   | Detected   | 2555.1   | Detected   | Znf512b       | 0.837518028 | 0.92129933 | 1.13706555 | 1.2508122 |
| A_55_P2156 | 80       | Detected | 59.2     | Detected   | 70.3     | Detected   | 67       | Detected   | 9430007A20Rik | 0.8375      | 0.87875    | 1.13175676 | 1.1875    |
| A_55_P1968 | 3017.7   | Detected | 2245.8   | Detected   | 2602.4   | Detected   | 2527.2   | Detected   | Agpat9        | 0.837458992 | 0.86237863 | 1.12530056 | 1.1587853 |
| A_51_P3703 | 792.6    | Detected | 704.4    | Detected   | 724.8    | Detected   | 663.7    | Detected   | Zbtb48        | 0.837370679 | 0.91445874 | 0.94222033 | 1.0289608 |
| A_55_P2015 | 6513.7   | Detected | 7067.2   | Detected   | 6205.4   | Detected   | 5453.9   | Detected   | Rab4a         | 0.837296774 | 0.95266899 | 0.77172006 | 0.8780564 |
| A_51_P2159 | 1544.7   | Detected | 1132.6   | Detected   | 901.8    | Detected   | 1293.3   | Detected   | Zswim6        | 0.837249951 | 0.58380268 | 1.14188593 | 0.7962211 |
| A_52_P3845 | 1576.5   | Detected | 1763.1   | Detected   | 1377.5   | Detected   | 1319.9   | Detected   | Rnf217        | 0.83723438  | 0.87377101 | 0.74862458 | 0.7812943 |
| A_55_P2068 | 22.1     | Detected | 40       | Detected   | 8.9      | Not Detect | 18.5     | Not Detect | Defa1         | 0.837104072 | 0.40271493 | 0.4625     | 0.2225    |
| A_55_P1978 | 20317.9  | Detected | 16135.1  | Detected   | 16481.7  | Detected   | 17007.9  | Detected   | Aven          | 0.837089463 | 0.81119112 | 1.05409325 | 1.0214811 |
| A_51_P5045 | 17942.2  | Detected | 16355.3  | Detected   | 19134.4  | Detected   | 15018.7  | Detected   | Derl1         | 0.837060115 | 1.0664467  | 0.91827726 | 1.1699205 |
| A_51_P3200 | 939.6    | Detected | 799.4    | Detected   | 525.1    | Detected   | 786.5    | Detected   | Atp10a        | 0.837058323 | 0.55885483 | 0.9838629  | 0.6568677 |
| A_66_P1371 | 1191.9   | Detected | 899.7    | Detected   | 1088.6   | Detected   | 997.6    | Detected   | Coq7          | 0.836982968 | 0.91333166 | 1.10881405 | 1.2099589 |
| A_52_P1119 | 3438     | Detected | 2445.9   | Detected   | 3094     | Detected   | 2876.7   | Detected   | 1810030007Rik | 0.836736475 | 0.89994183 | 1.17613149 | 1.264974  |

|            |          |          |          |            |         |            |          |            |               |             |            |            |           |
|------------|----------|----------|----------|------------|---------|------------|----------|------------|---------------|-------------|------------|------------|-----------|
| A_55_P2023 | 9408.4   | Detected | 7292.6   | Detected   | 8995.2  | Detected   | 7871.6   | Detected   | Zfp386        | 0.836656605 | 0.9560818  | 1.07939555 | 1.2334695 |
| A_55_P2067 | 8271.6   | Detected | 5849.7   | Detected   | 9160.2  | Detected   | 6920.4   | Detected   | Arpc5l        | 0.836645873 | 1.10742783 | 1.18303503 | 1.5659265 |
| A_55_P1973 | 12290    | Detected | 7925.4   | Detected   | 12404.6 | Detected   | 10282.1  | Detected   | Mapk1         | 0.836623271 | 1.00932465 | 1.29736039 | 1.5651702 |
| A_51_P4458 | 2521.3   | Detected | 767      | Detected   | 702.1   | Detected   | 2109.2   | Detected   | Deptor        | 0.836552572 | 0.27846746 | 2.74993481 | 0.9153846 |
| A_55_P1958 | 5460.3   | Detected | 5443.2   | Detected   | 4558.2  | Detected   | 4567.8   | Detected   | B9d1          | 0.836547442 | 0.8347893  | 0.83917549 | 0.8374118 |
| A_55_P2045 | 10200.6  | Detected | 11525.9  | Detected   | 12030   | Detected   | 8533.2   | Detected   | Ehd1          | 0.836539027 | 1.17934239 | 0.74034999 | 1.0437363 |
| A_55_P2112 | 5555     | Detected | 4437.7   | Detected   | 3539.9  | Detected   | 4646.9   | Detected   | Cdk5rap2      | 0.836525653 | 0.63724572 | 1.04714154 | 0.797688  |
| A_55_P2398 | 91.1     | Detected | 54.5     | Detected   | 35.1    | Detected   | 76.2     | Detected   | D2Ert640e     | 0.836443469 | 0.38529089 | 1.39816514 | 0.6440367 |
| A_52_P1915 | 1522.8   | Detected | 1555.3   | Detected   | 1179.6  | Detected   | 1273.6   | Detected   | Sec24b        | 0.836354085 | 0.77462569 | 0.81887739 | 0.7584389 |
| A_51_P4111 | 21481.8  | Detected | 19558.9  | Detected   | 19073.3 | Detected   | 17965.5  | Detected   | Rpp25l        | 0.8363126   | 0.88788183 | 0.91853325 | 0.9751724 |
| A_55_P2307 | 246.8    | Detected | 191.4    | Detected   | 212.2   | Detected   | 206.4    | Detected   | 5730526G10Rik | 0.8363047   | 0.85980551 | 1.07836991 | 1.1086729 |
| A_55_P2100 | 17.7     | Detected | 14.7     | Detected   | 20.9    | Detected   | 14.8     | Not Detect | Defb30        | 0.836158192 | 1.18079096 | 1.00680272 | 1.4217687 |
| A_55_P2109 | 9431.5   | Detected | 7887.9   | Detected   | 7526.4  | Detected   | 7885.8   | Detected   | Slc1a4        | 0.836113025 | 0.79800668 | 0.99973377 | 0.9541703 |
| A_52_P6608 | 311.1    | Detected | 236.1    | Detected   | 205.9   | Detected   | 260.1    | Detected   | Napb          | 0.836065574 | 0.66184507 | 1.10165184 | 0.8720881 |
| A_51_P3055 | 276.9    | Detected | 281.7    | Detected   | 166.1   | Detected   | 231.5    | Detected   | St3gal2       | 0.836041892 | 0.59985554 | 0.82179624 | 0.5896344 |
| A_52_P2435 | 1148.5   | Detected | 868.1    | Detected   | 938.3   | Detected   | 960.1    | Detected   | Rmdn2         | 0.835959948 | 0.81697867 | 1.10597857 | 1.0808663 |
| A_55_P1996 | 4045.3   | Detected | 3632.1   | Detected   | 3731.8  | Detected   | 3381.3   | Detected   | Zbtb2         | 0.835858898 | 0.92250266 | 0.93094904 | 1.0274497 |
| A_52_P4479 | 6739.1   | Detected | 5820.9   | Detected   | 5242.4  | Detected   | 5632.3   | Detected   | LOC101055890  | 0.83576442  | 0.77790803 | 0.96759951 | 0.9006167 |
| A_51_P3650 | 37412.2  | Detected | 9826.1   | Detected   | 44682.8 | Detected   | 31266.4  | Detected   | Gclc          | 0.835727383 | 1.19433768 | 3.18197454 | 4.5473586 |
| A_52_P1050 | 5310     | Detected | 3335.8   | Detected   | 4667.5  | Detected   | 4437.5   | Detected   | Clcn7         | 0.835687382 | 0.87900188 | 1.3302656  | 1.3992146 |
| A_55_P1971 | 5081.5   | Detected | 3937.2   | Detected   | 4015.3  | Detected   | 4246     | Detected   | Pqbp1         | 0.835580045 | 0.79018006 | 1.07843137 | 1.0198364 |
| A_55_P2123 | 1010.1   | Detected | 525.7    | Detected   | 638.9   | Detected   | 844      | Detected   | Jam2          | 0.835560836 | 0.63251163 | 1.60547841 | 1.2153319 |
| A_55_P1976 | 299059.9 | Detected | 271990   | Detected   | 308405  | Detected   | 249861.1 | Detected   | Rpl36         | 0.835488476 | 1.03124825 | 0.91864076 | 1.1338836 |
| A_55_P2381 | 110      | Detected | 69.2     | Detected   | 114.2   | Detected   | 91.9     | Detected   | A330106F07Rik | 0.835454545 | 1.03818182 | 1.32803468 | 1.650289  |
| A_51_P3844 | 15.8     | Detected | 10.4     | Not Detect | 7.5     | Not Detect | 13.2     | Not Detect | Dll4          | 0.835443038 | 0.47468354 | 1.26923077 | 0.7211538 |
| A_55_P1972 | 565.7    | Detected | 430.4    | Detected   | 540.1   | Detected   | 472.6    | Detected   | 4632415L05Rik | 0.835425137 | 0.95474633 | 1.09804833 | 1.2548792 |
| A_55_P2017 | 1245     | Detected | 880.5    | Detected   | 1104.2  | Detected   | 1040.1   | Detected   | Cdc45         | 0.835421687 | 0.88690763 | 1.18126065 | 1.2540602 |
| A_65_P0525 | 7234     | Detected | 5640     | Detected   | 6273.8  | Detected   | 6042.6   | Detected   | Cdc25a        | 0.835305502 | 0.86726569 | 1.07138298 | 1.1123759 |
| A_55_P2435 | 77.1     | Detected | 130.3    | Detected   | 38.4    | Detected   | 64.4     | Detected   | Xpo7          | 0.835278859 | 0.49805447 | 0.49424405 | 0.2947045 |
| A_51_P2031 | 1285.2   | Detected | 833.2    | Detected   | 446.7   | Detected   | 1073.5   | Detected   | Apobr         | 0.835278556 | 0.34757236 | 1.28840614 | 0.5361258 |
| A_55_P2087 | 75783.9  | Detected | 62102.5  | Detected   | 60777.7 | Detected   | 63300.3  | Detected   | Dnaja1        | 0.835273719 | 0.80198697 | 1.01928747 | 0.9786675 |
| A_55_P2027 | 2715.8   | Detected | 2284.1   | Detected   | 1956.2  | Detected   | 2268.4   | Detected   | Zcchc2        | 0.835260328 | 0.72030341 | 0.9931264  | 0.8564424 |
| A_51_P2644 | 17.6     | Detected | 15.4     | Not Detect | 19.7    | Detected   | 14.7     | Not Detect | Ralgapa2      | 0.835227273 | 1.11931818 | 0.95454545 | 1.2792208 |
| A_55_P2153 | 6923.3   | Detected | 5601.6   | Detected   | 6544.8  | Detected   | 5781.2   | Detected   | Zfp386        | 0.835035316 | 0.94532954 | 1.03206227 | 1.1683805 |
| A_55_P2000 | 44.2     | Detected | 52.6     | Detected   | 37.8    | Detected   | 36.9     | Not Detect | Chek1         | 0.834841629 | 0.85520362 | 0.70152091 | 0.7186312 |
| A_55_P1966 | 126319.2 | Detected | 119103.2 | Detected   | 107922  | Detected   | 105452.6 | Detected   | Cyp2u1        | 0.834810543 | 0.85435943 | 0.88538847 | 0.9061217 |
| A_51_P4071 | 1864.1   | Detected | 1487.9   | Detected   | 2047.5  | Detected   | 1556.1   | Detected   | Clp1          | 0.834772813 | 1.09838528 | 1.04583641 | 1.3761005 |
| A_55_P2086 | 7526.8   | Detected | 7146.6   | Detected   | 6446.6  | Detected   | 6283.1   | Detected   | Recql4        | 0.834763777 | 0.85648616 | 0.87917331 | 0.9020513 |
| A_51_P3497 | 340      | Detected | 546.5    | Detected   | 848.9   | Detected   | 283.8    | Detected   | Slc25a45      | 0.834705882 | 2.49676471 | 0.51930467 | 1.5533394 |
| A_52_P5807 | 393.6    | Detected | 386.1    | Detected   | 339.2   | Detected   | 328.5    | Detected   | Zfp781        | 0.834603659 | 0.86178862 | 0.85081585 | 0.8785289 |

|            |          |          |          |            |          |          |         |            |               |             |            |            |           |
|------------|----------|----------|----------|------------|----------|----------|---------|------------|---------------|-------------|------------|------------|-----------|
| A_55_P2109 | 87257    | Detected | 83775.9  | Detected   | 82204.1  | Detected | 72824.9 | Detected   | Ppp1r14b      | 0.834602381 | 0.94209175 | 0.86928222 | 0.981238  |
| A_52_P6254 | 3642.5   | Detected | 2878.5   | Detected   | 2998.6   | Detected | 3039.8  | Detected   | Hnrnpa0       | 0.834536719 | 0.82322581 | 1.05603613 | 1.0417231 |
| A_51_P2324 | 3996.5   | Detected | 2828.3   | Detected   | 2638.8   | Detected | 3335.1  | Detected   | BC018507      | 0.834505192 | 0.66027774 | 1.17918891 | 0.9329986 |
| A_55_P1978 | 57.4     | Detected | 49.8     | Detected   | 59.8     | Detected | 47.9    | Not Detect | Wasf3         | 0.834494774 | 1.04181185 | 0.96184739 | 1.2008032 |
| A_51_P1765 | 14646.7  | Detected | 12409    | Detected   | 15104.5  | Detected | 12222.4 | Detected   | Ntmt1         | 0.834481487 | 1.03125619 | 0.98496253 | 1.2172214 |
| A_55_P1983 | 49536.2  | Detected | 45998.8  | Detected   | 48603.8  | Detected | 41336.3 | Detected   | Srsf7         | 0.834466511 | 0.9811774  | 0.89863866 | 1.0566319 |
| A_55_P2143 | 74482    | Detected | 70058.4  | Detected   | 67229.3  | Detected | 62151.3 | Detected   | Gps1          | 0.834447249 | 0.9026248  | 0.88713559 | 0.959618  |
| A_55_P2136 | 11080.5  | Detected | 9695.7   | Detected   | 12749.8  | Detected | 9246    | Detected   | Dpy30         | 0.834438879 | 1.15065205 | 0.95361861 | 1.3149953 |
| A_55_P2152 | 113970.9 | Detected | 138248.3 | Detected   | 106809.1 | Detected | 95097.3 | Detected   | Mybbp1a       | 0.834399834 | 0.93716115 | 0.6878732  | 0.7725889 |
| A_55_P2279 | 205.8    | Detected | 186.4    | Detected   | 141.9    | Detected | 171.7   | Detected   | 2900076A07Rik | 0.834305151 | 0.68950437 | 0.92113734 | 0.7612661 |
| A_51_P4952 | 10826.2  | Detected | 11634.4  | Detected   | 5178.4   | Detected | 9031.8  | Detected   | Gpx8          | 0.83425394  | 0.47832111 | 0.77630131 | 0.4450939 |
| A_55_P2064 | 28047.8  | Detected | 22307.2  | Detected   | 25617.5  | Detected | 23398.9 | Detected   | Fam89b        | 0.834250815 | 0.91335149 | 1.04893936 | 1.148396  |
| A_55_P1999 | 129.6    | Detected | 135.3    | Detected   | 130.1    | Detected | 108.1   | Detected   | Adam17        | 0.834104938 | 1.00385802 | 0.79896526 | 0.9615669 |
| A_55_P1988 | 244.7    | Detected | 186.5    | Detected   | 196.7    | Detected | 204.1   | Detected   | Stom          | 0.83408255  | 0.80384144 | 1.09436997 | 1.0546917 |
| A_52_P5228 | 14786.6  | Detected | 12283.6  | Detected   | 12160.4  | Detected | 12333.2 | Detected   | Zfp442        | 0.834079504 | 0.82239325 | 1.0040379  | 0.9899704 |
| A_55_P2052 | 2263.2   | Detected | 2119.1   | Detected   | 2383.2   | Detected | 1887.6  | Detected   | Nadk2         | 0.834040297 | 1.05302227 | 0.89075551 | 1.1246284 |
| A_55_P1996 | 2155.6   | Detected | 1746.3   | Detected   | 1427.4   | Detected | 1797.7  | Detected   | Prnp          | 0.833967341 | 0.66218222 | 1.02943366 | 0.8173853 |
| A_55_P2159 | 26.5     | Detected | 17.5     | Not Detect | 31.2     | Detected | 22.1    | Not Detect | Vmn2r27       | 0.833962264 | 1.17735849 | 1.26285714 | 1.7828571 |
| A_51_P2920 | 8375.6   | Detected | 5632.6   | Detected   | 12458.7  | Detected | 6984    | Detected   | Haghl         | 0.833850709 | 1.4874994  | 1.23992472 | 2.2118915 |
| A_55_P2096 | 773.3    | Detected | 741.1    | Detected   | 933.6    | Detected | 644.8   | Detected   | Styk1         | 0.833829044 | 1.20729342 | 0.87005802 | 1.259749  |
| A_51_P2798 | 11149.1  | Detected | 9288.6   | Detected   | 11582.9  | Detected | 9295.7  | Detected   | Ndufa11       | 0.833762366 | 1.03890897 | 1.00076438 | 1.2470017 |
| A_55_P2057 | 161.8    | Detected | 94.3     | Detected   | 113.9    | Detected | 134.9   | Detected   | Zfp12         | 0.833745365 | 0.7039555  | 1.43054083 | 1.2078473 |
| A_52_P5613 | 7473.3   | Detected | 5263.7   | Detected   | 6826.9   | Detected | 6230.1  | Detected   | Fam160b1      | 0.833647786 | 0.91350541 | 1.18359709 | 1.2969774 |
| A_55_P2033 | 201.1    | Detected | 130.4    | Detected   | 195      | Detected | 167.6   | Detected   | Mrrf          | 0.833416211 | 0.96966683 | 1.28527607 | 1.4953988 |
| A_55_P1969 | 202.2    | Detected | 141.6    | Detected   | 129.1    | Detected | 168.5   | Detected   | Morf4l2       | 0.833333333 | 0.63847676 | 1.18997175 | 0.9117232 |
| A_66_P1392 | 2212.1   | Detected | 2304     | Detected   | 2225.3   | Detected | 1843.4  | Detected   | Rbpj          | 0.833325799 | 1.00596718 | 0.80008681 | 0.965842  |
| A_55_P2049 | 17918.3  | Detected | 14169.9  | Detected   | 15040.9  | Detected | 14931.7 | Detected   | Ube2a         | 0.833321241 | 0.83941557 | 1.05376185 | 1.0614683 |
| A_55_P2095 | 7265.6   | Detected | 5683.2   | Detected   | 7331.9   | Detected | 6054    | Detected   | Evi5          | 0.833241577 | 1.00912519 | 1.06524493 | 1.2901006 |
| A_51_P4435 | 5238     | Detected | 5066     | Detected   | 4771.5   | Detected | 4364.5  | Detected   | Mum1          | 0.833237877 | 0.91093929 | 0.86152783 | 0.9418674 |
| A_55_P1992 | 134.9    | Detected | 120.6    | Detected   | 130.6    | Detected | 112.4   | Detected   | Dnaja1        | 0.833209785 | 0.96812454 | 0.93200663 | 1.0829187 |
| A_52_P4562 | 23377.3  | Detected | 16220.6  | Detected   | 21132.7  | Detected | 19477.6 | Detected   | Tmem167       | 0.833184328 | 0.90398378 | 1.20079405 | 1.302831  |
| A_52_P1654 | 128.2    | Detected | 112.7    | Detected   | 98.4     | Detected | 106.8   | Detected   | Wwp1          | 0.833073323 | 0.7675507  | 0.94764862 | 0.8731145 |
| A_66_P1322 | 13429.5  | Detected | 5410.7   | Detected   | 14008    | Detected | 11186.1 | Detected   | Mlph          | 0.832949849 | 1.04307681 | 2.06740348 | 2.5889441 |
| A_55_P2001 | 75.4     | Detected | 48.6     | Detected   | 96.9     | Detected | 62.8    | Detected   | Zscan29       | 0.832891247 | 1.28514589 | 1.29218107 | 1.9938272 |
| A_52_P3849 | 6628.6   | Detected | 8465.7   | Detected   | 6541     | Detected | 5520.6  | Detected   | Wdr43         | 0.832845548 | 0.98678454 | 0.65211382 | 0.7726473 |
| A_51_P4957 | 674.6    | Detected | 505.3    | Detected   | 723.5    | Detected | 561.8   | Detected   | 1700049L16Rik | 0.832789801 | 1.0724874  | 1.11181476 | 1.4318227 |
| A_55_P1989 | 25271.5  | Detected | 15573.5  | Detected   | 25380.6  | Detected | 21045   | Detected   | Hmgn1         | 0.832756267 | 1.00431712 | 1.351334   | 1.62973   |
| A_55_P1975 | 67927.9  | Detected | 65589.6  | Detected   | 59226.1  | Detected | 56561.6 | Detected   | Hemgn         | 0.832671112 | 0.87189653 | 0.86235623 | 0.90298   |
| A_55_P1975 | 48.4     | Detected | 42.1     | Detected   | 61.9     | Detected | 40.3    | Not Detect | Apoc1         | 0.832644628 | 1.27892562 | 0.95724466 | 1.4703088 |
| A_66_P1306 | 46.6     | Detected | 42.7     | Detected   | 34.8     | Detected | 38.8    | Not Detect | Gm9979        | 0.832618026 | 0.74678112 | 0.90866511 | 0.8149883 |



|            |          |          |          |          |          |            |          |            |               |             |            |            |           |
|------------|----------|----------|----------|----------|----------|------------|----------|------------|---------------|-------------|------------|------------|-----------|
| A_51_P1787 | 6018.7   | Detected | 5058.2   | Detected | 6207.3   | Detected   | 5011.1   | Detected   | Hibch         | 0.832588433 | 1.03133567 | 0.99068839 | 1.2271757 |
| A_51_P2860 | 22.1     | Detected | 27       | Detected | 15.5     | Not Detect | 18.4     | Not Detect | LOC101055743  | 0.832579186 | 0.70135747 | 0.68148148 | 0.5740741 |
| A_52_P2865 | 814.6    | Detected | 419.3    | Detected | 455.9    | Detected   | 678.2    | Detected   | Slc23a2       | 0.832555856 | 0.55966118 | 1.61745767 | 1.0872883 |
| A_51_P1473 | 15366.3  | Detected | 13507.5  | Detected | 18856.7  | Detected   | 12791.8  | Detected   | Dpp3          | 0.832458041 | 1.22714642 | 0.94701462 | 1.396017  |
| A_66_P1247 | 176      | Detected | 155.5    | Detected | 146.3    | Detected   | 146.5    | Detected   | Zfp606        | 0.832386364 | 0.83125    | 0.94212219 | 0.940836  |
| A_55_P2010 | 420.6    | Detected | 385.7    | Detected | 431.5    | Detected   | 350.1    | Detected   | Gm10509       | 0.832382311 | 1.02591536 | 0.90770029 | 1.1187451 |
| A_55_P2015 | 13425.2  | Detected | 10896.4  | Detected | 12961.1  | Detected   | 11174.1  | Detected   | Asnsd1        | 0.832322796 | 0.96543068 | 1.02548548 | 1.1894846 |
| A_66_P1037 | 5383.4   | Detected | 3935.9   | Detected | 4760.7   | Detected   | 4480.6   | Detected   | AI606181      | 0.83229929  | 0.88432961 | 1.13839274 | 1.2095582 |
| A_55_P1977 | 4248.6   | Detected | 2637.2   | Detected | 2801.1   | Detected   | 3535.3   | Detected   | Galk2         | 0.832109401 | 0.65929953 | 1.34055058 | 1.0621492 |
| A_51_P1610 | 948      | Detected | 743.9    | Detected | 624.5    | Detected   | 788.8    | Detected   | Cep170        | 0.832067511 | 0.65875527 | 1.06035757 | 0.8394946 |
| A_55_P2080 | 29721.7  | Detected | 26545.9  | Detected | 28026.2  | Detected   | 24728.2  | Detected   | Taf9          | 0.831991441 | 0.94295414 | 0.93152615 | 1.0557638 |
| A_55_P2119 | 12513.7  | Detected | 12457.5  | Detected | 11237.5  | Detected   | 10411    | Detected   | Rasl2-9       | 0.831968163 | 0.89801577 | 0.83572145 | 0.902067  |
| A_51_P2610 | 2050.6   | Detected | 1897.1   | Detected | 2203.4   | Detected   | 1705.7   | Detected   | Mtf2          | 0.831805325 | 1.07451478 | 0.89910917 | 1.161457  |
| A_51_P4403 | 41009.2  | Detected | 32136.1  | Detected | 44948.2  | Detected   | 34111.3  | Detected   | Bcap31        | 0.83179628  | 1.09605162 | 1.06146359 | 1.3986825 |
| A_55_P2440 | 1455.2   | Detected | 1420.6   | Detected | 1544.7   | Detected   | 1210.4   | Detected   | Wdhd1         | 0.831775701 | 1.06150357 | 0.85203435 | 1.0873575 |
| A_51_P4878 | 63236.9  | Detected | 31179.1  | Detected | 37279    | Detected   | 52596    | Detected   | Lxn           | 0.831729576 | 0.5895134  | 1.68689924 | 1.1956407 |
| A_55_P2017 | 69529.1  | Detected | 53728.5  | Detected | 55437.2  | Detected   | 57827    | Detected   | 2810417H13Rik | 0.831694931 | 0.79732371 | 1.07628168 | 1.0318025 |
| A_55_P2088 | 1367.4   | Detected | 1412.8   | Detected | 532      | Detected   | 1137.2   | Detected   | Scarb1        | 0.831651309 | 0.38905953 | 0.80492639 | 0.3765572 |
| A_55_P1997 | 64218.2  | Detected | 61006.8  | Detected | 54798.7  | Detected   | 53398    | Detected   | Mtfr2         | 0.831508825 | 0.8533204  | 0.87527948 | 0.8982392 |
| A_55_P1960 | 157903   | Detected | 131239.8 | Detected | 147308.8 | Detected   | 131272.8 | Detected   | Rps4x         | 0.831350893 | 0.93290691 | 1.00025145 | 1.12244   |
| A_51_P2079 | 387.7    | Detected | 226.9    | Detected | 83.7     | Detected   | 322.3    | Detected   | Ptger4        | 0.831312871 | 0.21588857 | 1.42044954 | 0.368885  |
| A_55_P2009 | 16559    | Detected | 11847.9  | Detected | 16485.2  | Detected   | 13765.2  | Detected   | Ttc3          | 0.831282082 | 0.99554321 | 1.16182615 | 1.3914027 |
| A_51_P3907 | 11298    | Detected | 13669.1  | Detected | 9291.2   | Detected   | 9391.2   | Detected   | Ube2e1        | 0.831226766 | 0.82237564 | 0.68703865 | 0.6797229 |
| A_55_P2183 | 902      | Detected | 543.1    | Detected | 742.8    | Detected   | 749.7    | Detected   | Foxd2os       | 0.831152993 | 0.82350333 | 1.38040876 | 1.3677039 |
| A_55_P2109 | 31045.2  | Detected | 21276.7  | Detected | 29166.7  | Detected   | 25802.7  | Detected   | Nans          | 0.831133315 | 0.93949145 | 1.21272096 | 1.3708282 |
| A_55_P1981 | 17344.2  | Detected | 17954.5  | Detected | 15444.2  | Detected   | 14414.9  | Detected   | Nup88         | 0.831107805 | 0.89045329 | 0.80285722 | 0.8601855 |
| A_55_P2004 | 53550.6  | Detected | 45535.6  | Detected | 48184.1  | Detected   | 44500.2  | Detected   | Tacc3         | 0.83099349  | 0.89978637 | 0.97726175 | 1.0581633 |
| A_52_P4177 | 63.9     | Detected | 56.8     | Detected | 106.1    | Detected   | 53.1     | Detected   | Olfrl1170     | 0.830985915 | 1.66040689 | 0.93485915 | 1.8679577 |
| A_55_P1991 | 105.9    | Detected | 73.8     | Detected | 94.2     | Detected   | 88       | Detected   | Mrrf          | 0.830972616 | 0.88951841 | 1.19241192 | 1.2764228 |
| A_55_P1953 | 123312.4 | Detected | 114844.5 | Detected | 105131.1 | Detected   | 102468.4 | Detected   | Sema4c        | 0.830965904 | 0.85255903 | 0.89223602 | 0.9154213 |
| A_52_P5080 | 26010.4  | Detected | 24999.7  | Detected | 24926.4  | Detected   | 21612.7  | Detected   | Psap          | 0.830925322 | 0.95832436 | 0.86451837 | 0.997068  |
| A_55_P1978 | 60.9     | Detected | 84.3     | Detected | 62.6     | Detected   | 50.6     | Not Detect | Otx2          | 0.830870279 | 1.02791461 | 0.60023725 | 0.742586  |
| A_55_P1996 | 11291.2  | Detected | 4922.2   | Detected | 8831     | Detected   | 9380.4   | Detected   | Pofut1        | 0.830770866 | 0.7821135  | 1.90573321 | 1.7941165 |
| A_55_P1956 | 1861.5   | Detected | 1695.5   | Detected | 1608.7   | Detected   | 1546.2   | Detected   | Cyb5d2        | 0.830620467 | 0.86419554 | 0.91194338 | 0.9488057 |
| A_55_P2132 | 999.1    | Detected | 703.2    | Detected | 747.4    | Detected   | 829.8    | Detected   | Prpf4b        | 0.830547493 | 0.74807327 | 1.18003413 | 1.0628555 |
| A_52_P5178 | 65.5     | Detected | 77       | Detected | 54.5     | Detected   | 54.4     | Detected   | Sec1          | 0.830534351 | 0.83206107 | 0.70649351 | 0.7077922 |
| A_55_P1987 | 409.8    | Detected | 270      | Detected | 355.3    | Detected   | 340.3    | Detected   | Nbeal1        | 0.830405076 | 0.8670083  | 1.26037037 | 1.3159259 |
| A_55_P2087 | 92022.9  | Detected | 85024.6  | Detected | 84298.6  | Detected   | 76411.7  | Detected   | Gps1          | 0.83035527  | 0.91606111 | 0.89870108 | 0.9914613 |
| A_55_P2105 | 33135.4  | Detected | 13033.5  | Detected | 16813.6  | Detected   | 27513    | Detected   | Atf5          | 0.830320443 | 0.50742107 | 2.11094487 | 1.2900295 |
| A_55_P2149 | 99620.1  | Detected | 88858.3  | Detected | 98718.6  | Detected   | 82715.3  | Detected   | Gm8618        | 0.830307338 | 0.99095062 | 0.93086746 | 1.1109666 |

|            |          |          |          |            |          |            |          |            |          |                   |            |            |           |
|------------|----------|----------|----------|------------|----------|------------|----------|------------|----------|-------------------|------------|------------|-----------|
| A_55_P2132 | 12088.8  | Detected | 9982     | Detected   | 10997.1  | Detected   | 10037    | Detected   | Tmem248  | 0.830272649       | 0.90969327 | 1.00550992 | 1.101693  |
| A_55_P2040 | 205      | Detected | 199.2    | Detected   | 189.7    | Detected   | 170.2    | Detected   | Ccnt1    | 0.830243902       | 0.92536585 | 0.85441767 | 0.9523092 |
| A_55_P2129 | 236.2    | Detected | 173.7    | Detected   | 197.9    | Detected   | 196.1    | Detected   | Prrt1    | 0.83022862        | 0.83784928 | 1.12895797 | 1.1393207 |
| A_55_P2114 | 6764     | Detected | 5589.5   | Detected   | 5871.9   | Detected   | 5615     | Detected   | Gm8801   | 0.830130101       | 0.86811059 | 1.00456213 | 1.0505233 |
| A_55_P2210 | 20.6     | Detected | 13.9     | Not Detect | 15.3     | Not Detect | 17.1     | Not Detect | Trcg1    | 0.830097087       | 0.74271845 | 1.23021583 | 1.1007194 |
| A_55_P2175 | 4361     | Detected | 2898.3   | Detected   | 4410.1   | Detected   | 3619.6   | Detected   | Olf1466  | 0.829993121       | 1.01125889 | 1.24887003 | 1.5216161 |
| A_55_P2028 | 95090.9  | Detected | 85973.1  | Detected   | 78123.5  | Detected   | 78918.8  | Detected   | Sgsh     | 0.829930098       | 0.82156652 | 0.91794759 | 0.908697  |
| A_52_P5465 | 389.8    | Detected | 260.2    | Detected   | 979.9    | Detected   | 323.5    | Detected   | Npy4r    | 0.829912776       | 2.51385326 | 1.2432744  | 3.7659493 |
| A_51_P4004 | 87       | Detected | 75.3     | Detected   | 75.3     | Detected   | 72.2     | Detected   | Pten     | 0.829885057       | 0.86551724 | 0.95883134 | 1         |
| A_55_P2164 | 1766.2   | Detected | 1476.3   | Detected   | 1688     | Detected   | 1465.7   | Detected   | Rnps1    | 0.829860718       | 0.95572415 | 0.99281989 | 1.143399  |
| A_55_P1986 | 14169.7  | Detected | 9092.2   | Detected   | 10072.8  | Detected   | 11758.4  | Detected   | Gtf2ird1 | 0.829827025       | 0.71086897 | 1.29324036 | 1.1078507 |
| A_55_P1965 | 68908.2  | Detected | 45460.2  | Detected   | 62967.6  | Detected   | 57180.9  | Detected   | Spc25    | 0.829812707       | 0.91378965 | 1.25782333 | 1.3851149 |
| A_55_P2114 | 2490.7   | Detected | 1791     | Detected   | 2152.3   | Detected   | 2066.8   | Detected   | Dpp9     | 0.829806882       | 0.86413458 | 1.15399218 | 1.2017309 |
| A_52_P5583 | 18.8     | Detected | 25.3     | Detected   | 23.3     | Detected   | 15.6     | Not Detect | Mapk8    | 0.829787234       | 1.2393617  | 0.61660079 | 0.9209486 |
| A_52_P8607 | 2997.2   | Detected | 2829.9   | Detected   | 3615.9   | Detected   | 2486.8   | Detected   | Mrpl1    | 0.829707727       | 1.206426   | 0.87875897 | 1.2777483 |
| A_55_P2027 | 29822.5  | Detected | 29752.1  | Detected   | 25763.2  | Detected   | 24742.8  | Detected   | Phc2     | 0.829668874       | 0.86388465 | 0.83163205 | 0.8659288 |
| A_55_P2094 | 21307.7  | Detected | 15460.9  | Detected   | 21763    | Detected   | 17676.4  | Detected   | BC085271 | 0.82957804        | 1.02136786 | 1.14329696 | 1.4076153 |
| A_55_P2114 | 2349.7   | Detected | 1719.4   | Detected   | 1929.9   | Detected   | 1949.1   | Detected   | Zbtb14   | 0.82951015        | 0.82133889 | 1.13359311 | 1.1224264 |
| A_55_P1967 | 41688.1  | Detected | 27206.5  | Detected   | 40392.2  | Detected   | 34578.6  | Detected   | Ncaph    | 0.829459726       | 0.96891439 | 1.27096833 | 1.4846526 |
| A_52_P1712 | 588.1    | Detected | 271.2    | Detected   | 441      | Detected   | 487.8    | Detected   | Irs1     | 0.829450774       | 0.74987247 | 1.79867257 | 1.6261062 |
| A_55_P2050 | 95764.4  | Detected | 92304.2  | Detected   | 83932.6  | Detected   | 79427.7  | Detected   | Cep170b  | 0.829407379       | 0.87644887 | 0.86049931 | 0.9093042 |
| A_51_P2151 | 240.6    | Detected | 152.5    | Detected   | 192.9    | Detected   | 199.5    | Detected   | Efcab11  | 0.829177057       | 0.80174564 | 1.30819672 | 1.264918  |
| A_55_P2090 | 3376.3   | Detected | 2698.1   | Detected   | 2953.5   | Detected   | 2799.5   | Detected   | Ptp4a1   | 0.829162101       | 0.87477416 | 1.037582   | 1.0946592 |
| A_55_P2060 | 5904     | Detected | 3573     | Detected   | 5707.9   | Detected   | 4895.1   | Detected   | Fam45a   | 0.829115854       | 0.96678523 | 1.37002519 | 1.5975091 |
| A_51_P4848 | 227.6    | Detected | 210.4    | Detected   | 202.7    | Detected   | 188.7    | Detected   | Asgr2    | 0.829086116       | 0.89059754 | 0.89686312 | 0.963403  |
| A_51_P2623 | 118672.2 | Detected | 101647.8 | Detected   | 100493.5 | Detected   | 98388    | Detected   | Rbm3     | 0.8290737         | 0.84681585 | 0.96793044 | 0.9886441 |
| A_52_P1067 | 11333.2  | Detected | 8223.7   | Detected   | 9425.6   | Detected   | 9395.8   | Detected   | Ddx46    | 0.82905093        | 0.83168037 | 1.14252709 | 1.1461508 |
| A_55_P2151 | 72223.6  | Detected | 60492.2  | Detected   | 62648.2  | Detected   | 59874.5  | Detected   | Dynl1f   | 0.829015723       | 0.86742007 | 0.98978877 | 1.035641  |
| A_51_P4015 | 184.2    | Detected | 173      | Detected   | 202.1    | Detected   | 152.7    | Detected   | Col9a2   | 0.828990228       | 1.09717698 | 0.88265896 | 1.1682081 |
| A_55_P2056 | 129.2    | Detected | 101.6    | Detected   | 40.5     | Detected   | 107.1    | Detected   | Mtss1l   | 0.828947368       | 0.31346749 | 1.05413386 | 0.398622  |
| A_55_P2119 | 131492   | Detected | 123651.8 | Detected   | 115817.8 | Detected   | 108996.4 | Detected   | Rasl2-9  | 0.828920391       | 0.88079731 | 0.88147847 | 0.9366447 |
| A_55_P2016 | 31249.1  | Detected | 27436.7  | Detected   | 28080    | Detected   | 25902.8  | Detected   | Eif3b    | 0.828913473       | 0.89858588 | 0.94409313 | 1.0234467 |
| A_55_P1994 | 29447.7  | Detected | 26088.7  | Detected   | 30949.7  | Detected   | 24407.3  | Detected   | Ythdf1   | 0.828835529       | 1.05100568 | 0.93555064 | 1.1863259 |
| A_55_P2035 | 6746     | Detected | 5713.7   | Detected   | 3700.9   | Detected   | 5590.3   | Detected   | Nfil3    | 0.828683664       | 0.54860658 | 0.97840279 | 0.6477239 |
| A_55_P2148 | 3102.7   | Detected | 2153.5   | Detected   | 2615.6   | Detected   | 2571     | Detected   | Xxylt1   | 0.828633126       | 0.8430077  | 1.19387044 | 1.2145809 |
| A_55_P2011 | 56.6     | Detected | 32.5     | Detected   | 30.8     | Detected   | 46.9     | Not Detect | Lyst     | 0.828621908       | 0.54416961 | 1.44307692 | 0.9476923 |
| A_52_P6237 | 20264.8  | Detected | 14304.1  | Detected   | 21758    | Detected   | 16789.6  | Detected   | Fem1b    | 0.828510521       | 1.07368442 | 1.17376137 | 1.5211023 |
| A_55_P1981 | 20955.8  | Detected | 14672.6  | Detected   | 15904.8  | Detected   | 17361.8  | Detected   |          | 8-Sep 0.828496168 | 0.75896888 | 1.1832804  | 1.0839797 |
| A_55_P2116 | 2151.5   | Detected | 2436     | Detected   | 928.7    | Detected   | 1782.3   | Detected   | Pfkfb3   | 0.828398792       | 0.43165234 | 0.73165025 | 0.3812397 |
| A_55_P1999 | 17301    | Detected | 16502.8  | Detected   | 16323.2  | Detected   | 14330.9  | Detected   | Nat10    | 0.828327842       | 0.94348304 | 0.86839203 | 0.989117  |

|            |          |          |         |          |          |          |          |            |              |             |            |            |           |
|------------|----------|----------|---------|----------|----------|----------|----------|------------|--------------|-------------|------------|------------|-----------|
| A_51_P1468 | 3994.4   | Detected | 2279.8  | Detected | 2864.8   | Detected | 3308.2   | Detected   | Mocs3        | 0.828209493 | 0.71720409 | 1.4510922  | 1.2566015 |
| A_55_P2040 | 14435.9  | Detected | 13486.9 | Detected | 14014    | Detected | 11952.5  | Detected   | Cplx2        | 0.827970546 | 0.97077425 | 0.88623034 | 1.0390824 |
| A_55_P2077 | 8611.3   | Detected | 7032.7  | Detected | 7830.7   | Detected | 7129.2   | Detected   | Zfp513       | 0.827888937 | 0.90935167 | 1.01372161 | 1.1134699 |
| A_55_P2103 | 62453.2  | Detected | 63498.1 | Detected | 64068.3  | Detected | 51699.4  | Detected   | Prdx6        | 0.827810264 | 1.02586096 | 0.81418814 | 1.0089798 |
| A_52_P4750 | 1640.9   | Detected | 1543.6  | Detected | 1357.7   | Detected | 1358.1   | Detected   | Etaa1        | 0.827655555 | 0.82741179 | 0.87982638 | 0.8795672 |
| A_51_P1013 | 63.2     | Detected | 48      | Detected | 54.4     | Detected | 52.3     | Detected   | St6gal1      | 0.827531646 | 0.86075949 | 1.08958333 | 1.1333333 |
| A_55_P2146 | 185.5    | Detected | 175.4   | Detected | 162.2    | Detected | 153.5    | Detected   | Kansl1       | 0.827493261 | 0.87439353 | 0.87514253 | 0.9247434 |
| A_51_P1409 | 3430.3   | Detected | 2367.8  | Detected | 3099.6   | Detected | 2838.2   | Detected   | Pmm2         | 0.82739119  | 0.90359444 | 1.19866543 | 1.3090633 |
| A_55_P2036 | 1476.7   | Detected | 1159.5  | Detected | 1328.4   | Detected | 1221.8   | Detected   | Lrif1        | 0.827385386 | 0.89957337 | 1.05373006 | 1.1456662 |
| A_51_P2095 | 3175     | Detected | 2442.1  | Detected | 3858.5   | Detected | 2626.9   | Detected   | Galnt1       | 0.827370079 | 1.21527559 | 1.07567258 | 1.5799926 |
| A_55_P2026 | 14574.9  | Detected | 14420.4 | Detected | 14064.1  | Detected | 12058.6  | Detected   | Zranb2       | 0.827353875 | 0.96495345 | 0.83621814 | 0.9752919 |
| A_66_P1261 | 155.2    | Detected | 92.6    | Detected | 120.3    | Detected | 128.4    | Detected   | Tubb1        | 0.827319588 | 0.77512887 | 1.38660907 | 1.2991361 |
| A_52_P5706 | 1735.2   | Detected | 1345.6  | Detected | 1196.2   | Detected | 1435.4   | Detected   | Flywch1      | 0.827224527 | 0.68937298 | 1.06673603 | 0.8889715 |
| A_55_P1991 | 146763.1 | Detected | 77984.4 | Detected | 123057.1 | Detected | 121401.7 | Detected   | Fkbp1a       | 0.827194983 | 0.83847438 | 1.5567434  | 1.5779707 |
| A_52_P2702 | 2863.6   | Detected | 2154    | Detected | 2072.9   | Detected | 2368.7   | Detected   | Sgol2        | 0.827175583 | 0.72387903 | 1.09967502 | 0.9623491 |
| A_55_P2007 | 5047     | Detected | 3699.6  | Detected | 4310     | Detected | 4174.6   | Detected   | Vbp1         | 0.827144839 | 0.85397266 | 1.12839226 | 1.1649908 |
| A_55_P1955 | 9563.2   | Detected | 7245.5  | Detected | 8257.2   | Detected | 7909.9   | Detected   | Csrp2bp      | 0.827118538 | 0.86343483 | 1.0916983  | 1.1396315 |
| A_55_P2177 | 38834.1  | Detected | 31328.9 | Detected | 34574.6  | Detected | 32120.1  | Detected   | Srsf3        | 0.827110709 | 0.89031547 | 1.02525464 | 1.1036008 |
| A_51_P4953 | 6962.9   | Detected | 5853.8  | Detected | 4721.5   | Detected | 5758.8   | Detected   | Fhod1        | 0.827069181 | 0.6780939  | 0.98377123 | 0.8065701 |
| A_66_P1181 | 26.6     | Detected | 20.5    | Detected | 19       | Detected | 22       | Not Detect | Gm11669      | 0.827067669 | 0.71428571 | 1.07317073 | 0.9268293 |
| A_55_P2029 | 11846.4  | Detected | 10963.5 | Detected | 11730.9  | Detected | 9797.7   | Detected   | LOC101055813 | 0.827061386 | 0.9902502  | 0.89366534 | 1.0699959 |
| A_55_P2062 | 70788.9  | Detected | 46877.2 | Detected | 67264.4  | Detected | 58538.6  | Detected   | Tsen34       | 0.826946032 | 0.95021112 | 1.24876486 | 1.4349065 |
| A_52_P4578 | 236.9    | Detected | 141.6   | Detected | 215      | Detected | 195.9    | Detected   | Ptrf         | 0.826931195 | 0.90755593 | 1.38347458 | 1.5183616 |
| A_55_P1966 | 56540.5  | Detected | 53793.7 | Detected | 49051.4  | Detected | 46753.8  | Detected   | Srek1        | 0.826908145 | 0.8675445  | 0.86913152 | 0.9118428 |
| A_55_P1971 | 17618.5  | Detected | 12260.5 | Detected | 16212.4  | Detected | 14566.7  | Detected   | Lage3        | 0.826784346 | 0.92019184 | 1.1881     | 1.3223278 |
| A_55_P2053 | 38.1     | Detected | 78.9    | Detected | 35.9     | Detected | 31.5     | Not Detect | Acbd7        | 0.826771654 | 0.94225722 | 0.39923954 | 0.4550063 |
| A_55_P2097 | 32.9     | Detected | 31.4    | Detected | 29.5     | Detected | 27.2     | Not Detect | Strm         | 0.82674772  | 0.89665653 | 0.86624204 | 0.9394904 |
| A_55_P2090 | 744.5    | Detected | 651.4   | Detected | 540      | Detected | 615.5    | Detected   | Casp8ap2     | 0.826729349 | 0.72531901 | 0.94488793 | 0.8289837 |
| A_52_P1118 | 6850.9   | Detected | 4800.1  | Detected | 5806     | Detected | 5663.5   | Detected   | Naa50        | 0.826679706 | 0.84747989 | 1.17987125 | 1.2095581 |
| A_55_P2009 | 26231.6  | Detected | 15840.1 | Detected | 27191.4  | Detected | 21684.4  | Detected   | Ccrn4l       | 0.826651825 | 1.03658946 | 1.368956   | 1.716618  |
| A_55_P1983 | 239.9    | Detected | 250.4   | Detected | 289.4    | Detected | 198.3    | Detected   | Pxmp4        | 0.826594414 | 1.20633597 | 0.79193291 | 1.1557508 |
| A_66_P1097 | 1567.7   | Detected | 1091.7  | Detected | 1553.2   | Detected | 1295.7   | Detected   | Hn1l         | 0.826497417 | 0.99075078 | 1.18686452 | 1.4227352 |
| A_52_P2434 | 525      | Detected | 316.5   | Detected | 279.1    | Detected | 433.9    | Detected   | Ulk2         | 0.82647619  | 0.53161905 | 1.37093207 | 0.8818325 |
| A_55_P2160 | 36.3     | Detected | 28.8    | Detected | 39.6     | Detected | 30       | Not Detect | Gm5602       | 0.826446281 | 1.09090909 | 1.04166667 | 1.375     |
| A_51_P5017 | 647.8    | Detected | 555     | Detected | 500      | Detected | 535.2    | Detected   | Rgmb         | 0.82618092  | 0.77184316 | 0.96432432 | 0.9009009 |
| A_51_P4735 | 25849    | Detected | 26463.4 | Detected | 26482.6  | Detected | 21355.9  | Detected   | Apex1        | 0.826178962 | 1.02451159 | 0.80699759 | 1.0007255 |
| A_51_P4696 | 6221.1   | Detected | 4092.4  | Detected | 5911.1   | Detected | 5139.4   | Detected   | Stk38        | 0.826123997 | 0.95016958 | 1.25584009 | 1.4444091 |
| A_51_P2468 | 251.9    | Detected | 139.5   | Detected | 203.8    | Detected | 208.1    | Detected   | Acta1        | 0.826121477 | 0.80905121 | 1.49175627 | 1.4609319 |
| A_55_P2011 | 8838.6   | Detected | 6386    | Detected | 7569.2   | Detected | 7301     | Detected   | Anapc5       | 0.826035798 | 0.85637997 | 1.14328218 | 1.1852803 |
| A_55_P2148 | 11015.4  | Detected | 9790.9  | Detected | 10329.9  | Detected | 9098.9   | Detected   | Cplx2        | 0.826016304 | 0.93776894 | 0.92932213 | 1.0550511 |

|            |          |            |          |            |          |            |          |            |               |             |            |            |           |
|------------|----------|------------|----------|------------|----------|------------|----------|------------|---------------|-------------|------------|------------|-----------|
| A_55_P1972 | 6570.6   | Detected   | 4828.5   | Detected   | 5060.7   | Detected   | 5427.3   | Detected   | Slc25a14      | 0.825997626 | 0.77020363 | 1.12401367 | 1.0480895 |
| A_55_P2197 | 31.6     | Detected   | 41.5     | Detected   | 33.7     | Detected   | 26.1     | Not Detect | 2010004M13Rik | 0.825949367 | 1.0664557  | 0.62891566 | 0.8120482 |
| A_55_P2112 | 324      | Detected   | 235      | Detected   | 187.8    | Detected   | 267.6    | Detected   | Cdk5rap2      | 0.825925926 | 0.57962963 | 1.1387234  | 0.7991489 |
| A_55_P2042 | 89749.1  | Detected   | 86864.6  | Detected   | 78137.5  | Detected   | 74122.1  | Detected   | Arl6ip6       | 0.825881262 | 0.87062154 | 0.85330618 | 0.8995321 |
| A_55_P1978 | 2726.1   | Detected   | 1817.2   | Detected   | 2201.3   | Detected   | 2251.3   | Detected   | Zfp318        | 0.825831774 | 0.80749055 | 1.238884   | 1.2113691 |
| A_55_P2046 | 197199.2 | Detected   | 167386.9 | Detected   | 197052.3 | Detected   | 162849.8 | Detected   | Atp5g3        | 0.825813695 | 0.99925507 | 0.97289453 | 1.1772265 |
| A_55_P2251 | 234.2    | Detected   | 148.3    | Detected   | 151.7    | Detected   | 193.4    | Detected   | Mpp2          | 0.825789923 | 0.64773698 | 1.30411328 | 1.0229265 |
| A_55_P1956 | 543.5    | Detected   | 230.8    | Detected   | 150      | Detected   | 448.8    | Detected   | Rnf157        | 0.82575897  | 0.27598896 | 1.94454073 | 0.6499133 |
| A_55_P2237 | 10.9     | Not Detect | 5.2      | Not Detect | 19       | Detected   | 9        | Not Detect | LOC552873     | 0.825688073 | 1.74311927 | 1.73076923 | 3.6538462 |
| A_55_P2107 | 10.9     | Not Detect | 32.4     | Detected   | 3.2      | Not Detect | 9        | Not Detect | Cabyr         | 0.825688073 | 0.29357798 | 0.27777778 | 0.0987654 |
| A_55_P1976 | 69458.3  | Detected   | 56973.8  | Detected   | 68513.6  | Detected   | 57349.6  | Detected   | Cnih4         | 0.825669502 | 0.98639903 | 1.00659601 | 1.2025457 |
| A_55_P1972 | 1557.6   | Detected   | 1062.4   | Detected   | 1253.4   | Detected   | 1286     | Detected   | Mtcp1         | 0.825629173 | 0.80469954 | 1.21046687 | 1.1797816 |
| A_55_P2172 | 1333.6   | Detected   | 802.5    | Detected   | 1229.1   | Detected   | 1101     | Detected   | B4galt1       | 0.825584883 | 0.92164067 | 1.37196262 | 1.5315888 |
| A_51_P4015 | 2353     | Detected   | 2587.7   | Detected   | 2207.5   | Detected   | 1942.5   | Detected   | Rnmtl1        | 0.825541861 | 0.93816405 | 0.75066662 | 0.8530742 |
| A_52_P5601 | 65.3     | Detected   | 659.2    | Detected   | 50.1     | Detected   | 53.9     | Detected   | Gm22          | 0.825421133 | 0.76722818 | 0.08176578 | 0.0760012 |
| A_55_P2048 | 292269.3 | Detected   | 271424.6 | Detected   | 275748.6 | Detected   | 241244.5 | Detected   | Hsp90ab1      | 0.825418544 | 0.94347439 | 0.88880853 | 1.0159308 |
| A_55_P1985 | 39.5     | Detected   | 45.1     | Detected   | 29.9     | Detected   | 32.6     | Not Detect | Ghrh          | 0.825316456 | 0.75696203 | 0.72283814 | 0.6629712 |
| A_51_P2021 | 149.4    | Detected   | 92.8     | Detected   | 92.2     | Detected   | 123.3    | Detected   | Tom1l2        | 0.825301205 | 0.61713521 | 1.32866379 | 0.9935345 |
| A_55_P2170 | 34266    | Detected   | 28256.8  | Detected   | 31358.8  | Detected   | 28273.2  | Detected   | Taf9          | 0.825109438 | 0.91515788 | 1.00058039 | 1.1097789 |
| A_52_P1493 | 2384.8   | Detected   | 2058.5   | Detected   | 2205.4   | Detected   | 1967.7   | Detected   | Usp40         | 0.825100637 | 0.92477357 | 0.95589021 | 1.0713626 |
| A_55_P1986 | 12       | Not Detect | 25.9     | Detected   | 7.5      | Not Detect | 9.9      | Not Detect | Tubgcp4       | 0.825       | 0.625      | 0.38223938 | 0.2895753 |
| A_55_P2029 | 23.4     | Detected   | 16.3     | Not Detect | 15       | Not Detect | 19.3     | Not Detect | Gm5544        | 0.824786325 | 0.64102564 | 1.18404908 | 0.9202454 |
| A_55_P2015 | 77752.3  | Detected   | 88535.7  | Detected   | 68052.4  | Detected   | 64128.9  | Detected   | Nap1l1        | 0.824784604 | 0.87524613 | 0.72432815 | 0.7686436 |
| A_51_P3254 | 31009.8  | Detected   | 23949.4  | Detected   | 26793.6  | Detected   | 25568.3  | Detected   | Utp3          | 0.824523215 | 0.86403653 | 1.06759668 | 1.1187587 |
| A_55_P1971 | 96.3     | Detected   | 178.5    | Detected   | 6.5      | Not Detect | 79.4     | Detected   | Cd1d1         | 0.82450675  | 0.0674974  | 0.44481793 | 0.0364146 |
| A_51_P4669 | 63965    | Detected   | 48592.8  | Detected   | 64357.6  | Detected   | 52738.7  | Detected   | Pgp           | 0.824493082 | 1.00613773 | 1.08531922 | 1.3244267 |
| A_51_P1662 | 4994.1   | Detected   | 3448.3   | Detected   | 3889.5   | Detected   | 4117.4   | Detected   | Osbpl1a       | 0.824452854 | 0.77881901 | 1.19403764 | 1.1279471 |
| A_55_P2161 | 68.9     | Detected   | 59.7     | Detected   | 46.2     | Detected   | 56.8     | Detected   | AU017193      | 0.824383164 | 0.67053701 | 0.95142379 | 0.7738693 |
| A_55_P2088 | 73074.6  | Detected   | 70638.9  | Detected   | 66428.6  | Detected   | 60241.2  | Detected   | Fam160b2      | 0.82437947  | 0.90905185 | 0.8528049  | 0.9403969 |
| A_52_P2324 | 34.7     | Detected   | 35.8     | Detected   | 36.6     | Detected   | 28.6     | Not Detect | Olfrl419      | 0.824207493 | 1.05475504 | 0.79888268 | 1.0223464 |
| A_66_P1389 | 331.5    | Detected   | 241.9    | Detected   | 231.8    | Detected   | 273.2    | Detected   | Plxna2        | 0.82413273  | 0.69924585 | 1.12939231 | 0.9582472 |
| A_55_P2013 | 789.8    | Detected   | 277      | Detected   | 532      | Detected   | 650.9    | Detected   | Renbp         | 0.824132692 | 0.67358825 | 2.34981949 | 1.9205776 |
| A_55_P2021 | 1586.4   | Detected   | 1417.4   | Detected   | 1297.7   | Detected   | 1307.4   | Detected   | Zmym4         | 0.824130106 | 0.81801563 | 0.92239311 | 0.9155496 |
| A_51_P2925 | 84.7     | Detected   | 103.3    | Detected   | 38.4     | Detected   | 69.8     | Detected   | P4htm         | 0.824085006 | 0.45336482 | 0.67570184 | 0.3717328 |
| A_55_P2207 | 10.8     | Not Detect | 14.4     | Not Detect | 18.2     | Detected   | 8.9      | Not Detect | AA414993      | 0.824074074 | 1.68518519 | 0.61805556 | 1.2638889 |
| A_55_P2175 | 62.5     | Detected   | 67.1     | Detected   | 49.6     | Detected   | 51.5     | Detected   | Sfxn5         | 0.824       | 0.7936     | 0.76751118 | 0.7391952 |
| A_55_P2119 | 15021.9  | Detected   | 14814.5  | Detected   | 13139    | Detected   | 12377.1  | Detected   | Vma21         | 0.823937052 | 0.87465634 | 0.835472   | 0.8869013 |
| A_52_P5033 | 865.9    | Detected   | 766.9    | Detected   | 789.4    | Detected   | 713.4    | Detected   | Slc4a1ap      | 0.823882665 | 0.91165262 | 0.93023862 | 1.0293389 |
| A_55_P2015 | 75203.6  | Detected   | 59670.2  | Detected   | 79800.4  | Detected   | 61953.3  | Detected   | Tceb2         | 0.823807637 | 1.06112473 | 1.03826198 | 1.3373577 |
| A_55_P2089 | 71790.8  | Detected   | 74664.3  | Detected   | 68743.3  | Detected   | 59141.4  | Detected   | Hspe1         | 0.823801936 | 0.95755027 | 0.79209743 | 0.9206984 |

|            |                  |                  |                  |                  |          |             |            |            |           |
|------------|------------------|------------------|------------------|------------------|----------|-------------|------------|------------|-----------|
| A_51_P3883 | 47.1 Detected    | 135.7 Detected   | 42 Detected      | 38.8 Not Detect  | Aff3     | 0.823779193 | 0.89171975 | 0.28592483 | 0.3095063 |
| A_55_P1992 | 23406.7 Detected | 21795.3 Detected | 26544.9 Detected | 19281.6 Detected | Bloc1s1  | 0.823764136 | 1.13407272 | 0.8846678  | 1.2179185 |
| A_51_P1851 | 14254.2 Detected | 13034.3 Detected | 16729.1 Detected | 11741.4 Detected | Dpy30    | 0.823715116 | 1.17362602 | 0.90080787 | 1.2834675 |
| A_55_P2101 | 5179.8 Detected  | 5600.2 Detected  | 3644.1 Detected  | 4266.4 Detected  | Dscc1    | 0.823661145 | 0.70352137 | 0.76182993 | 0.6507089 |
| A_52_P1022 | 1191.1 Detected  | 555.3 Detected   | 736.1 Detected   | 980.9 Detected   | Mex3b    | 0.823524473 | 0.61800017 | 1.76643256 | 1.3255898 |
| A_55_P2013 | 26714.4 Detected | 22188.3 Detected | 20306 Detected   | 21999.4 Detected | Dmwd     | 0.823503429 | 0.7601144  | 0.9914865  | 0.915167  |
| A_51_P1659 | 1376.5 Detected  | 1181.2 Detected  | 1324.2 Detected  | 1133.5 Detected  | Zfp770   | 0.823465311 | 0.96200509 | 0.95961734 | 1.1210633 |
| A_55_P2027 | 25866.2 Detected | 23989.8 Detected | 22020.4 Detected | 21297.6 Detected | Serpinb8 | 0.823375679 | 0.85131948 | 0.88777731 | 0.9179068 |
| A_51_P4798 | 6208.5 Detected  | 2550.4 Detected  | 5638.9 Detected  | 5111.9 Detected  | Lonrf3   | 0.823371185 | 0.90825481 | 2.00435226 | 2.2109865 |
| A_51_P2068 | 18.1 Detected    | 13.9 Not Detect  | 15.4 Not Detect  | 14.9 Not Detect  | Rufy2    | 0.82320442  | 0.85082873 | 1.07194245 | 1.1079137 |
| A_55_P1969 | 33254.9 Detected | 32559.7 Detected | 24645.6 Detected | 27375.5 Detected | Fxr2     | 0.823201994 | 0.74111184 | 0.84077863 | 0.7569357 |
| A_55_P2000 | 5209.6 Detected  | 4081.4 Detected  | 4690.9 Detected  | 4288.5 Detected  | Stag1    | 0.8231918   | 0.90043381 | 1.05074239 | 1.149336  |
| A_55_P2007 | 16.4 Detected    | 17.1 Not Detect  | 14 Not Detect    | 13.5 Not Detect  | Tmem151b | 0.823170732 | 0.85365854 | 0.78947368 | 0.8187135 |
| A_66_P1090 | 2693.6 Detected  | 2066.3 Detected  | 2073.9 Detected  | 2217.2 Detected  | Brd9     | 0.823136323 | 0.76993614 | 1.07302909 | 1.0036781 |
| A_55_P1953 | 29171 Detected   | 18624.9 Detected | 26877.3 Detected | 24009.3 Detected | Ctnnd1   | 0.823053718 | 0.92137054 | 1.28909685 | 1.4430843 |
| A_55_P2145 | 11.3 Not Detect  | 20.8 Detected    | 3.4 Not Detect   | 9.3 Not Detect   | Btnl9    | 0.82300885  | 0.30088496 | 0.44711538 | 0.1634615 |
| A_55_P2066 | 36788.7 Detected | 33627.2 Detected | 30929.3 Detected | 30271.9 Detected | Trim27   | 0.82285865  | 0.84072827 | 0.90022065 | 0.9197703 |
| A_52_P5840 | 23264.1 Detected | 31805.6 Detected | 29073.6 Detected | 19142.3 Detected | Pop1     | 0.822825727 | 1.24971952 | 0.60185313 | 0.9141032 |
| A_55_P1982 | 2309.9 Detected  | 2112.7 Detected  | 2094.4 Detected  | 1900.5 Detected  | Rad51d   | 0.82276289  | 0.90670592 | 0.8995598  | 0.9913381 |
| A_55_P2062 | 88331.3 Detected | 70089.4 Detected | 66205.3 Detected | 72674 Detected   | Nono     | 0.822743467 | 0.74951122 | 1.03687576 | 0.9445836 |
| A_55_P2058 | 2679.1 Detected  | 2588.8 Detected  | 2512.8 Detected  | 2204.2 Detected  | Smek2    | 0.82273898  | 0.93792692 | 0.85143696 | 0.9706428 |
| A_55_P2123 | 1398.9 Detected  | 1371.4 Detected  | 1332.9 Detected  | 1150.9 Detected  | Kpna3    | 0.82271785  | 0.95282007 | 0.8392154  | 0.9719265 |
| A_55_P2084 | 757.5 Detected   | 593 Detected     | 1777.5 Detected  | 623.2 Detected   | Gcnt1    | 0.822706271 | 2.34653465 | 1.05092749 | 2.9974705 |
| A_55_P1989 | 13066.7 Detected | 10777.2 Detected | 11462.7 Detected | 10748.6 Detected | Tbca     | 0.82259484  | 0.87724521 | 0.99734625 | 1.0636065 |
| A_65_P1695 | 49492.2 Detected | 58302 Detected   | 38501.3 Detected | 40711.4 Detected | Ywhaq    | 0.822582144 | 0.77792662 | 0.69828479 | 0.660377  |
| A_55_P2149 | 179.8 Detected   | 146.7 Detected   | 113.5 Detected   | 147.9 Detected   | Tubgcp5  | 0.822580645 | 0.63125695 | 1.00817996 | 0.7736878 |
| A_52_P6635 | 386.6 Detected   | 354.6 Detected   | 560.9 Detected   | 318 Detected     | Nmrk1    | 0.822555613 | 1.4508536  | 0.89678511 | 1.5817823 |
| A_51_P4618 | 6833.6 Detected  | 5838.7 Detected  | 5467.7 Detected  | 5621 Detected    | Abl2     | 0.822553266 | 0.80012    | 0.9627143  | 0.9364585 |
| A_52_P1268 | 4818.2 Detected  | 3288.3 Detected  | 3477.2 Detected  | 3962.5 Detected  | Cramp1l  | 0.822402557 | 0.7216803  | 1.20502995 | 1.0574461 |
| A_52_P2849 | 1616.9 Detected  | 1745.4 Detected  | 1243.3 Detected  | 1329.7 Detected  | Ubt2     | 0.822376152 | 0.76894057 | 0.7618311  | 0.7123296 |
| A_51_P2582 | 1658.6 Detected  | 1279.3 Detected  | 1256.8 Detected  | 1363.8 Detected  | Gal      | 0.822259737 | 0.7577475  | 1.06605175 | 0.9824123 |
| A_51_P2223 | 6212.2 Detected  | 4698.6 Detected  | 5043.3 Detected  | 5107.4 Detected  | Tbc1d10a | 0.822156402 | 0.811838   | 1.08700464 | 1.0733623 |
| A_52_P4918 | 5321.9 Detected  | 4166.3 Detected  | 4959.8 Detected  | 4375.1 Detected  | Stag1    | 0.822093613 | 0.93196039 | 1.05011641 | 1.1904568 |
| A_55_P2019 | 644.7 Detected   | 292.4 Detected   | 424.7 Detected   | 530 Detected     | Cma2     | 0.822087793 | 0.65875601 | 1.8125855  | 1.4524624 |
| A_55_P1955 | 71890.1 Detected | 67600.5 Detected | 58724.7 Detected | 59096.4 Detected | Rad51c   | 0.822038083 | 0.81686769 | 0.87420063 | 0.8687022 |
| A_51_P2368 | 1140 Detected    | 764.3 Detected   | 352.4 Detected   | 937.1 Detected   | Parp8    | 0.822017544 | 0.30912281 | 1.22608923 | 0.4610755 |
| A_55_P2019 | 2256.3 Detected  | 2326.1 Detected  | 2392.3 Detected  | 1854.7 Detected  | Gxylt1   | 0.822009485 | 1.06027567 | 0.79734319 | 1.0284597 |
| A_55_P2093 | 27989 Detected   | 24578 Detected   | 27433.3 Detected | 23004.3 Detected | Ube2d2a  | 0.821905034 | 0.98014577 | 0.93597119 | 1.116173  |
| A_51_P5154 | 3149.4 Detected  | 2607.1 Detected  | 3230.5 Detected  | 2588.4 Detected  | Fkbp1    | 0.821870833 | 1.02575094 | 0.99282728 | 1.2391163 |
| A_55_P2094 | 3569.2 Detected  | 2844.1 Detected  | 2957.1 Detected  | 2933.3 Detected  | Erp29    | 0.821836826 | 0.82850499 | 1.03136317 | 1.0397314 |

|            |          |            |         |          |         |            |         |            |               |             |            |            |           |
|------------|----------|------------|---------|----------|---------|------------|---------|------------|---------------|-------------|------------|------------|-----------|
| A_55_P2033 | 6330.8   | Detected   | 5293.3  | Detected | 5763.6  | Detected   | 5202.5  | Detected   | Fastkd3       | 0.821776079 | 0.91040627 | 0.98284624 | 1.0888482 |
| A_55_P1995 | 18198.7  | Detected   | 14346.5 | Detected | 15201.3 | Detected   | 14955.2 | Detected   | Top2a         | 0.821772984 | 0.83529593 | 1.04242847 | 1.0595825 |
| A_55_P1999 | 27230.2  | Detected   | 28833.7 | Detected | 24549.1 | Detected   | 22368   | Detected   | Thoc7         | 0.8214409   | 0.90153947 | 0.77575892 | 0.851403  |
| A_51_P1508 | 11.2     | Not Detect | 103.5   | Detected | 4.6     | Not Detect | 9.2     | Not Detect | Lypd3         | 0.821428571 | 0.41071429 | 0.08888889 | 0.0444444 |
| A_55_P1962 | 356.5    | Detected   | 298.9   | Detected | 274.8   | Detected   | 292.8   | Detected   | LOC100045326  | 0.821318373 | 0.77082749 | 0.97959184 | 0.919371  |
| A_51_P4535 | 34544.8  | Detected   | 27730.5 | Detected | 40084.3 | Detected   | 28370.9 | Detected   | Zdhhc16       | 0.821278456 | 1.16035699 | 1.02309371 | 1.445495  |
| A_55_P2083 | 527.6    | Detected   | 431.5   | Detected | 601.1   | Detected   | 433.3   | Detected   | Mettl21a      | 0.821266111 | 1.13931008 | 1.00417149 | 1.3930475 |
| A_51_P5176 | 2920.5   | Detected   | 949     | Detected | 565.9   | Detected   | 2398.5  | Detected   | Ly6f          | 0.821263482 | 0.19376819 | 2.52739726 | 0.5963119 |
| A_51_P1765 | 56.5     | Detected   | 86.5    | Detected | 47.5    | Detected   | 46.4    | Not Detect | 1700109H08Rik | 0.821238938 | 0.84070796 | 0.53641618 | 0.5491329 |
| A_52_P4902 | 338.4    | Detected   | 236.3   | Detected | 256.6   | Detected   | 277.9   | Detected   | Ermard        | 0.821217494 | 0.75827423 | 1.1760474  | 1.0859077 |
| A_51_P2347 | 6823.8   | Detected   | 6615.4  | Detected | 8370    | Detected   | 5603.7  | Detected   | Lpar6         | 0.821199332 | 1.22658929 | 0.84706896 | 1.2652296 |
| A_55_P2011 | 15.1     | Detected   | 26.1    | Detected | 7.1     | Not Detect | 12.4    | Not Detect | Hopx          | 0.821192053 | 0.47019868 | 0.47509579 | 0.2720307 |
| A_55_P2075 | 91.1     | Detected   | 56.4    | Detected | 71.1    | Detected   | 74.8    | Detected   | Zfp619        | 0.821075741 | 0.78046103 | 1.32624113 | 1.2606383 |
| A_52_P3665 | 5250.1   | Detected   | 3960.5  | Detected | 3796    | Detected   | 4310.7  | Detected   | Slain2        | 0.821070075 | 0.72303385 | 1.08842318 | 0.9584648 |
| A_55_P2065 | 376.6    | Detected   | 288.9   | Detected | 230.5   | Detected   | 309.2   | Detected   | Kdm2b         | 0.821030271 | 0.61205523 | 1.07026653 | 0.7978539 |
| A_55_P1959 | 25.7     | Detected   | 20.6    | Detected | 22.4    | Detected   | 21.1    | Not Detect | Dlgap1        | 0.821011673 | 0.87159533 | 1.02427184 | 1.0873786 |
| A_52_P2389 | 432.7    | Detected   | 451.6   | Detected | 366.3   | Detected   | 355.2   | Detected   | Smg8          | 0.820892073 | 0.84654495 | 0.78653676 | 0.811116  |
| A_52_P4853 | 41761.4  | Detected   | 33648.2 | Detected | 39968.7 | Detected   | 34280   | Detected   | Ube2k         | 0.820853707 | 0.9570728  | 1.01877664 | 1.1878407 |
| A_55_P1993 | 13669    | Detected   | 12239   | Detected | 13771.5 | Detected   | 11218.9 | Detected   | Nsa2          | 0.820754993 | 1.00749872 | 0.91665169 | 1.1252145 |
| A_52_P1102 | 19334.3  | Detected   | 13528.2 | Detected | 19174.7 | Detected   | 15868.5 | Detected   | Nelfe         | 0.820743446 | 0.99174524 | 1.17299419 | 1.4173874 |
| A_52_P4764 | 4283.4   | Detected   | 3770.4  | Detected | 3411.9  | Detected   | 3515.2  | Detected   | Cul3          | 0.820656488 | 0.79654013 | 0.93231487 | 0.9049173 |
| A_55_P2146 | 103049.2 | Detected   | 95826.3 | Detected | 89484.4 | Detected   | 84560   | Detected   | Zcchc9        | 0.820578908 | 0.86836579 | 0.88242998 | 0.9338188 |
| A_55_P2174 | 152.7    | Detected   | 121.3   | Detected | 137.9   | Detected   | 125.3   | Detected   | Svopl         | 0.820563196 | 0.90307793 | 1.03297609 | 1.1368508 |
| A_51_P2551 | 5949.5   | Detected   | 4529.7  | Detected | 4920.5  | Detected   | 4881.8  | Detected   | Faf2          | 0.820539541 | 0.82704429 | 1.07773142 | 1.086275  |
| A_55_P1970 | 5609.9   | Detected   | 5002    | Detected | 4914.9  | Detected   | 4603.1  | Detected   | Srsf10        | 0.82053156  | 0.87611187 | 0.9202519  | 0.982587  |
| A_55_P2003 | 7323     | Detected   | 4074.9  | Detected | 6180.9  | Detected   | 6008.6  | Detected   | Taf4a         | 0.82051072  | 0.84403933 | 1.47453925 | 1.5168225 |
| A_55_P2229 | 24.5     | Detected   | 22.5    | Detected | 49.3    | Detected   | 20.1    | Not Detect | E430022K19Rik | 0.820408163 | 2.0122449  | 0.89333333 | 2.1911111 |
| A_52_P9028 | 1405.4   | Detected   | 1024.6  | Detected | 1274.3  | Detected   | 1152.9  | Detected   | Oaz2          | 0.820335847 | 0.90671695 | 1.1252196  | 1.2437049 |
| A_52_P4933 | 55.1     | Detected   | 45.7    | Detected | 49      | Detected   | 45.2    | Not Detect | Zfp866        | 0.820326679 | 0.8892922  | 0.98905908 | 1.0722101 |
| A_55_P1959 | 5461.7   | Detected   | 4502.8  | Detected | 4696.3  | Detected   | 4479.5  | Detected   | Zfp511        | 0.820165882 | 0.85986048 | 0.99482544 | 1.0429733 |
| A_55_P2424 | 29959.4  | Detected   | 27783.7 | Detected | 26038.8 | Detected   | 24571.5 | Detected   | Hecw1         | 0.82015995  | 0.86913623 | 0.88438545 | 0.937197  |
| A_52_P1506 | 106.7    | Detected   | 107.2   | Detected | 97      | Detected   | 87.5    | Detected   | Cog5          | 0.820056232 | 0.90909091 | 0.81623134 | 0.9048507 |
| A_55_P2110 | 1174.8   | Detected   | 963.3   | Detected | 1188.4  | Detected   | 963.4   | Detected   | Ubox5         | 0.820054477 | 1.01157644 | 1.00010381 | 1.2336759 |
| A_55_P2200 | 675.6    | Detected   | 320.2   | Detected | 428.6   | Detected   | 554     | Detected   | LOC552902     | 0.820011841 | 0.63439905 | 1.73016864 | 1.3385384 |
| A_51_P1415 | 12880.6  | Detected   | 9386.4  | Detected | 11703.5 | Detected   | 10561.2 | Detected   | Med22         | 0.819930749 | 0.90861451 | 1.12515981 | 1.2468572 |
| A_55_P2151 | 978.9    | Detected   | 1661.7  | Detected | 472.4   | Detected   | 802.5   | Detected   | Adarb1        | 0.819797732 | 0.48258249 | 0.48293916 | 0.2842872 |
| A_55_P1973 | 23.3     | Detected   | 27      | Detected | 26.6    | Detected   | 19.1    | Not Detect | AI606181      | 0.819742489 | 1.1416309  | 0.70740741 | 0.9851852 |
| A_55_P2143 | 47.1     | Detected   | 54.1    | Detected | 37.9    | Detected   | 38.6    | Not Detect | Col4a4        | 0.819532909 | 0.80467091 | 0.71349353 | 0.7005545 |
| A_55_P2049 | 566.2    | Detected   | 548     | Detected | 427.7   | Detected   | 464     | Detected   | Kat2a         | 0.81949841  | 0.75538679 | 0.84671533 | 0.7804745 |
| A_55_P1981 | 69.8     | Detected   | 59.6    | Detected | 51.5    | Detected   | 57.2    | Detected   | Gm13580       | 0.819484241 | 0.73782235 | 0.95973154 | 0.864094  |

|            |          |          |          |            |          |            |          |            |               |             |            |            |           |
|------------|----------|----------|----------|------------|----------|------------|----------|------------|---------------|-------------|------------|------------|-----------|
| A_66_P1082 | 473.6    | Detected | 362.2    | Detected   | 373      | Detected   | 388.1    | Detected   | Pwwp2a        | 0.819467905 | 0.78758446 | 1.07150745 | 1.0298178 |
| A_55_P2192 | 103      | Detected | 77.8     | Detected   | 70.3     | Detected   | 84.4     | Detected   | A330023F24Rik | 0.819417476 | 0.68252427 | 1.0848329  | 0.903599  |
| A_52_P5002 | 7729.8   | Detected | 4515.3   | Detected   | 4161.2   | Detected   | 6333.9   | Detected   | Atrn          | 0.81941318  | 0.53833217 | 1.40276394 | 0.9215777 |
| A_55_P2009 | 1601     | Detected | 1392.5   | Detected   | 1895.2   | Detected   | 1311.7   | Detected   | Aaed1         | 0.819300437 | 1.18376015 | 0.94197487 | 1.3610054 |
| A_51_P3278 | 101.2    | Detected | 47.5     | Detected   | 46.4     | Detected   | 82.9     | Detected   | Pth1r         | 0.81916996  | 0.45849802 | 1.74526316 | 0.9768421 |
| A_51_P2019 | 15438.3  | Detected | 14380.9  | Detected   | 11101.1  | Detected   | 12646    | Detected   | Setd8         | 0.81913164  | 0.71906233 | 0.87936082 | 0.7719336 |
| A_52_P5242 | 89.5     | Detected | 73.8     | Detected   | 73.9     | Detected   | 73.3     | Detected   | Olfrl49       | 0.818994413 | 0.82569832 | 0.99322493 | 1.001355  |
| A_55_P2058 | 24135.5  | Detected | 18389.5  | Detected   | 27015.9  | Detected   | 19766.2  | Detected   | Mcm10         | 0.81896791  | 1.11934288 | 1.07486337 | 1.4690938 |
| A_51_P1585 | 4094.3   | Detected | 3336.9   | Detected   | 3944.2   | Detected   | 3353     | Detected   | Zscan12       | 0.818943409 | 0.96333928 | 1.00482484 | 1.1819953 |
| A_55_P2113 | 98.8     | Detected | 53.2     | Detected   | 93.5     | Detected   | 80.9     | Detected   | Parp11        | 0.818825911 | 0.94635628 | 1.52067669 | 1.7575188 |
| A_51_P4894 | 6666.3   | Detected | 6064.4   | Detected   | 6555.2   | Detected   | 5458     | Detected   | Luc7l         | 0.818745031 | 0.98333408 | 0.9000066  | 1.0809313 |
| A_55_P2060 | 17.1     | Detected | 10.4     | Not Detect | 9.7      | Not Detect | 14       | Not Detect | 3110062M04Rik | 0.81871345  | 0.56725146 | 1.34615385 | 0.9326923 |
| A_55_P1996 | 1687.9   | Detected | 1079.3   | Detected   | 1643.1   | Detected   | 1381.8   | Detected   | Zfp931        | 0.818650394 | 0.97345814 | 1.28027425 | 1.5223756 |
| A_55_P2297 | 23.7     | Detected | 10.8     | Not Detect | 15.7     | Not Detect | 19.4     | Not Detect | 2010310C07Rik | 0.818565401 | 0.66244726 | 1.7962963  | 1.4537037 |
| A_55_P1980 | 179951.3 | Detected | 141343.9 | Detected   | 178335.1 | Detected   | 147290.8 | Detected   | Tceb2         | 0.818503673 | 0.99101868 | 1.04207398 | 1.2617106 |
| A_55_P2301 | 197.2    | Detected | 123.1    | Detected   | 99.3     | Detected   | 161.4    | Detected   | Wdr78         | 0.818458418 | 0.5035497  | 1.31112916 | 0.8066613 |
| A_55_P1959 | 20518.1  | Detected | 10132.4  | Detected   | 17303.2  | Detected   | 16790.5  | Detected   | Cobll1        | 0.818326258 | 0.84331395 | 1.65710987 | 1.7077099 |
| A_52_P5499 | 954.4    | Detected | 939.6    | Detected   | 951.4    | Detected   | 781      | Detected   | 5730455P16Rik | 0.818315172 | 0.99685666 | 0.83120477 | 1.0125585 |
| A_55_P2046 | 190160.2 | Detected | 168933.8 | Detected   | 196407   | Detected   | 155610.3 | Detected   | LOC101056029  | 0.818311613 | 1.0328502  | 0.92113183 | 1.162627  |
| A_55_P2146 | 491.5    | Detected | 326.1    | Detected   | 328.1    | Detected   | 402.2    | Detected   | Atf2          | 0.818311292 | 0.66754832 | 1.233364   | 1.0061331 |
| A_55_P2026 | 5836.6   | Detected | 4539.5   | Detected   | 3349.8   | Detected   | 4776     | Detected   | Slc4a7        | 0.818284618 | 0.57393003 | 1.05209825 | 0.7379227 |
| A_52_P6418 | 50497.4  | Detected | 40783.3  | Detected   | 48058    | Detected   | 41318.1  | Detected   | Ptplad1       | 0.818222324 | 0.95169256 | 1.01311321 | 1.1783745 |
| A_52_P4760 | 18.7     | Detected | 5.5      | Not Detect | 4.9      | Not Detect | 15.3     | Not Detect | Nxf3          | 0.818181818 | 0.26203209 | 2.78181818 | 0.8909091 |
| A_55_P1969 | 80.3     | Detected | 52       | Detected   | 80.8     | Detected   | 65.7     | Detected   | Rgs9          | 0.818181818 | 1.00622665 | 1.26346154 | 1.5538462 |
| A_51_P4901 | 16767.8  | Detected | 12992.8  | Detected   | 18289    | Detected   | 13717.9  | Detected   | Nubp2         | 0.81810971  | 1.0907215  | 1.05580783 | 1.4076258 |
| A_51_P2790 | 861.5    | Detected | 419.7    | Detected   | 502.5    | Detected   | 704.8    | Detected   | Kif3b         | 0.818107951 | 0.58328497 | 1.67929473 | 1.1972838 |
| A_55_P2321 | 380.6    | Detected | 293.1    | Detected   | 215.9    | Detected   | 311.3    | Detected   | D11ErtD726e   | 0.817919075 | 0.56726222 | 1.06209485 | 0.7366087 |
| A_55_P2141 | 372.7    | Detected | 436.5    | Detected   | 138.7    | Detected   | 304.8    | Detected   | Gm13275       | 0.817815938 | 0.37214918 | 0.69828179 | 0.3177549 |
| A_55_P1976 | 850.6    | Detected | 763.7    | Detected   | 2969.5   | Detected   | 695.6    | Detected   | Fgf18         | 0.817775688 | 3.49106513 | 0.91082886 | 3.8883069 |
| A_51_P2202 | 104.8    | Detected | 55.3     | Detected   | 11.2     | Not Detect | 85.7     | Detected   | Rnf165        | 0.817748092 | 0.10687023 | 1.54972875 | 0.2025316 |
| A_55_P2080 | 6495.8   | Detected | 6783.7   | Detected   | 7101.9   | Detected   | 5311.6   | Detected   | Ptpn2         | 0.817697589 | 1.09330644 | 0.78299453 | 1.0469066 |
| A_52_P1600 | 100.9    | Detected | 112.4    | Detected   | 13.2     | Not Detect | 82.5     | Detected   | Pcyt1b        | 0.817641229 | 0.1308226  | 0.73398577 | 0.1174377 |
| A_55_P1988 | 22415.8  | Detected | 46903.2  | Detected   | 15855.7  | Detected   | 18327.7  | Detected   | Znhit6        | 0.817624176 | 0.70734482 | 0.39075585 | 0.3380516 |
| A_51_P1987 | 14096.8  | Detected | 11953.3  | Detected   | 18521.3  | Detected   | 11523.7  | Detected   | BC055324      | 0.817469213 | 1.31386556 | 0.96406013 | 1.5494717 |
| A_65_P1153 | 82.7     | Detected | 47       | Detected   | 39.9     | Detected   | 67.6     | Detected   | Dennd4c       | 0.817412334 | 0.48246675 | 1.43829787 | 0.8489362 |
| A_52_P2225 | 7587.7   | Detected | 6184.3   | Detected   | 8236.5   | Detected   | 6202.2   | Detected   | 1110001A16Rik | 0.817401848 | 1.08550681 | 1.00289443 | 1.3318403 |
| A_55_P2006 | 102.4    | Detected | 91.7     | Detected   | 83.9     | Detected   | 83.7     | Detected   | Mfsd12        | 0.817382813 | 0.81933594 | 0.912759   | 0.91494   |
| A_55_P2186 | 134.7    | Detected | 138.3    | Detected   | 175.1    | Detected   | 110.1    | Detected   | 2810021J22Rik | 0.817371938 | 1.29992576 | 0.79609544 | 1.2660882 |
| A_51_P1935 | 3084.5   | Detected | 2704.7   | Detected   | 3179.8   | Detected   | 2521.1   | Detected   | Cdk7          | 0.817344788 | 1.03089642 | 0.93211816 | 1.1756572 |
| A_55_P2131 | 22101.6  | Detected | 21422.8  | Detected   | 19149.7  | Detected   | 18063.8  | Detected   | A530006G24Rik | 0.817307344 | 0.86643953 | 0.84320444 | 0.8938934 |

|            |          |            |          |            |         |            |          |            |               |             |            |            |           |
|------------|----------|------------|----------|------------|---------|------------|----------|------------|---------------|-------------|------------|------------|-----------|
| A_55_P2146 | 7013.1   | Detected   | 6028     | Detected   | 5403.4  | Detected   | 5731.8   | Detected   | Pank4         | 0.817299055 | 0.7704724  | 0.95086264 | 0.8963835 |
| A_51_P4802 | 6500.2   | Detected   | 4746.7   | Detected   | 6844.6  | Detected   | 5312.4   | Detected   | Nmral1        | 0.817267161 | 1.05298299 | 1.11917753 | 1.4419702 |
| A_55_P2001 | 187462.1 | Detected   | 144650.9 | Detected   | 138298  | Detected   | 153188.3 | Detected   | Flna          | 0.817169444 | 0.73773845 | 1.05902072 | 0.9560812 |
| A_51_P2213 | 19324    | Detected   | 11263.5  | Detected   | 18498.4 | Detected   | 15790.3  | Detected   | Tnks2         | 0.817134134 | 0.95727593 | 1.40189994 | 1.6423314 |
| A_55_P1978 | 1800.5   | Detected   | 1819.3   | Detected   | 1421.3  | Detected   | 1470.9   | Detected   | Hnrnpa3       | 0.816939739 | 0.78939184 | 0.80849777 | 0.7812345 |
| A_66_P1291 | 488.6    | Detected   | 464.4    | Detected   | 286.5   | Detected   | 399.1    | Detected   | Nasp          | 0.816823578 | 0.58636922 | 0.85938846 | 0.6169251 |
| A_52_P7422 | 4266.3   | Detected   | 3875.3   | Detected   | 2988.1  | Detected   | 3484.8   | Detected   | Fam117b       | 0.816820195 | 0.70039613 | 0.89923361 | 0.7710629 |
| A_55_P1993 | 42       | Detected   | 43.2     | Detected   | 49      | Detected   | 34.3     | Not Detect | Efr3a         | 0.816666667 | 1.16666667 | 0.79398148 | 1.1342593 |
| A_55_P2018 | 3802.3   | Detected   | 3138.4   | Detected   | 3200.3  | Detected   | 3105.2   | Detected   | Map2k4        | 0.816663598 | 0.84167478 | 0.98942136 | 1.0197234 |
| A_55_P2038 | 45.8     | Detected   | 35       | Detected   | 32.1    | Detected   | 37.4     | Not Detect | Olf1r18       | 0.816593886 | 0.70087336 | 1.06857143 | 0.9171429 |
| A_55_P2056 | 51406.4  | Detected   | 49154.5  | Detected   | 43971.1 | Detected   | 41976.5  | Detected   | Wdr89         | 0.816561751 | 0.85536237 | 0.85397064 | 0.8945488 |
| A_66_P1128 | 19844.6  | Detected   | 18796.2  | Detected   | 20537   | Detected   | 16204.1  | Detected   | Eif1a         | 0.81654959  | 1.0348911  | 0.86209447 | 1.0926145 |
| A_52_P3641 | 3266.2   | Detected   | 3800.4   | Detected   | 1935.2  | Detected   | 2666.8   | Detected   | Map3k14       | 0.816483988 | 0.59249281 | 0.70171561 | 0.5092096 |
| A_55_P2044 | 60351.6  | Detected   | 56373.9  | Detected   | 52010.7 | Detected   | 49275.9  | Detected   | Mms22l        | 0.816480425 | 0.86179488 | 0.87409067 | 0.9226025 |
| A_51_P2804 | 1561.5   | Detected   | 1040.8   | Detected   | 1131.3  | Detected   | 1274.6   | Detected   | Slc12a6       | 0.816266411 | 0.72449568 | 1.2246349  | 1.0869523 |
| A_52_P1318 | 30544.5  | Detected   | 27081.1  | Detected   | 29543.5 | Detected   | 24931.5  | Detected   | Bysl          | 0.816235329 | 0.96722814 | 0.92062361 | 1.0909269 |
| A_55_P1984 | 41164.6  | Detected   | 38490.6  | Detected   | 42669.6 | Detected   | 33599.8  | Detected   | Ube2i         | 0.81623045  | 1.03656054 | 0.87293521 | 1.108572  |
| A_55_P2100 | 538.8    | Detected   | 237.6    | Detected   | 441.4   | Detected   | 439.7    | Detected   | Dnmbp         | 0.816072754 | 0.81922791 | 1.85058923 | 1.8577441 |
| A_51_P1783 | 5093.8   | Detected   | 4600.1   | Detected   | 4542.8  | Detected   | 4155.7   | Detected   | Zfp326        | 0.815834937 | 0.89182928 | 0.9033934  | 0.9875437 |
| A_55_P1980 | 34.2     | Detected   | 27.1     | Detected   | 30.6    | Detected   | 27.9     | Not Detect | Olf1r124      | 0.815789474 | 0.89473684 | 1.0295203  | 1.1291513 |
| A_52_P6558 | 1122.5   | Detected   | 1174     | Detected   | 1069.5  | Detected   | 915.7    | Detected   | Chpt1         | 0.815768374 | 0.95278396 | 0.77998296 | 0.9109881 |
| A_66_P1401 | 36.9     | Detected   | 27.6     | Detected   | 35.4    | Detected   | 30.1     | Not Detect | Rgs9          | 0.815718157 | 0.95934959 | 1.09057971 | 1.2826087 |
| A_55_P2273 | 39.6     | Detected   | 24.4     | Detected   | 39.7    | Detected   | 32.3     | Not Detect | Nlrp3         | 0.815656566 | 1.00252525 | 1.32377049 | 1.6270492 |
| A_55_P2156 | 6963.2   | Detected   | 6497.2   | Detected   | 6152.3  | Detected   | 5679.5   | Detected   | Recql4        | 0.815645106 | 0.88354492 | 0.87414579 | 0.9469156 |
| A_51_P4681 | 625.1    | Detected   | 447.7    | Detected   | 504.8   | Detected   | 509.8    | Detected   | Trim39        | 0.815549512 | 0.80755079 | 1.13870896 | 1.1275408 |
| A_55_P2062 | 16612.5  | Detected   | 11884    | Detected   | 16370.6 | Detected   | 13544.1  | Detected   | Kifc1         | 0.815295711 | 0.98543868 | 1.13969202 | 1.3775328 |
| A_55_P2011 | 100.7    | Detected   | 104.9    | Detected   | 90.3    | Detected   | 82.1     | Detected   | Ebf4          | 0.815292949 | 0.89672294 | 0.78265014 | 0.8608198 |
| A_52_P3352 | 3630.8   | Detected   | 2846.4   | Detected   | 3267.2  | Detected   | 2959.8   | Detected   | Cdkal1        | 0.815192244 | 0.89985678 | 1.0398398  | 1.1478359 |
| A_55_P1994 | 15130.8  | Detected   | 10966.8  | Detected   | 10449.7 | Detected   | 12334.3  | Detected   | Asxl1         | 0.815178312 | 0.69062442 | 1.12469453 | 0.9528486 |
| A_55_P2038 | 60722    | Detected   | 56069.5  | Detected   | 50513.8 | Detected   | 49498.7  | Detected   | 4933427D06Rik | 0.815169131 | 0.8318863  | 0.88280973 | 0.900914  |
| A_55_P2272 | 23.8     | Detected   | 23.5     | Detected   | 18.6    | Detected   | 19.4     | Not Detect | AA914427      | 0.81512605  | 0.78151261 | 0.82553191 | 0.7914894 |
| A_55_P1986 | 55268.2  | Detected   | 51467.1  | Detected   | 45554.5 | Detected   | 45045    | Detected   | Mcam          | 0.815025639 | 0.82424432 | 0.87521931 | 0.8851188 |
| A_55_P2063 | 12588.6  | Detected   | 10018.6  | Detected   | 9003.7  | Detected   | 10259.3  | Detected   | 4930427A07Rik | 0.81496751  | 0.71522647 | 1.02402531 | 0.8986984 |
| A_55_P1965 | 508.7    | Detected   | 470.6    | Detected   | 441.1   | Detected   | 414.5    | Detected   | Abca17        | 0.814822096 | 0.86711225 | 0.88079048 | 0.9373141 |
| A_55_P2019 | 10.8     | Not Detect | 8.4      | Not Detect | 16.7    | Detected   | 8.8      | Not Detect | A430093F15Rik | 0.814814815 | 1.5462963  | 1.04761905 | 1.9880952 |
| A_55_P2179 | 10.8     | Not Detect | 18.6     | Detected   | 9.7     | Not Detect | 8.8      | Not Detect | Nmur1         | 0.814814815 | 0.89814815 | 0.47311828 | 0.5215054 |
| A_51_P2975 | 4103.6   | Detected   | 3263.7   | Detected   | 3241.8  | Detected   | 3343.2   | Detected   | Birc6         | 0.814699288 | 0.78998928 | 1.02435886 | 0.9932898 |
| A_55_P2463 | 709.3    | Detected   | 607.2    | Detected   | 753     | Detected   | 577.8    | Detected   | Zmym5         | 0.81460595  | 1.06161004 | 0.95158103 | 1.2401186 |
| A_55_P2054 | 687.7    | Detected   | 383.7    | Detected   | 605.7   | Detected   | 560.2    | Detected   | 9030624G23Rik | 0.814599389 | 0.88076196 | 1.45999479 | 1.578577  |
| A_51_P3325 | 884.2    | Detected   | 891.4    | Detected   | 762.6   | Detected   | 720.1    | Detected   | Polr3f        | 0.814408505 | 0.86247455 | 0.80783038 | 0.8555082 |



|            |                  |                  |                  |                  |               |             |            |            |           |
|------------|------------------|------------------|------------------|------------------|---------------|-------------|------------|------------|-----------|
| A_55_P2041 | 231.5 Detected   | 206.5 Detected   | 196.6 Detected   | 188.5 Detected   | Rdh1          | 0.81425486  | 0.84924406 | 0.91283293 | 0.9520581 |
| A_55_P1957 | 9089.8 Detected  | 7704.2 Detected  | 12072.4 Detected | 7401.4 Detected  | Mrpl49        | 0.814253339 | 1.32812603 | 0.96069676 | 1.5669894 |
| A_55_P2048 | 13994.8 Detected | 12510.9 Detected | 12149.9 Detected | 11394.9 Detected | Smn1          | 0.814223855 | 0.86817246 | 0.91079778 | 0.9711452 |
| A_55_P2024 | 593.5 Detected   | 534.9 Detected   | 355.1 Detected   | 483.2 Detected   | Rbl1          | 0.814153328 | 0.59831508 | 0.90334642 | 0.6638624 |
| A_51_P2257 | 26.9 Detected    | 14.5 Not Detect  | 18.5 Not Detect  | 21.9 Not Detect  | Prr5l         | 0.814126394 | 0.68773234 | 1.51034483 | 1.2758621 |
| A_55_P2075 | 300.2 Detected   | 218.3 Detected   | 263.9 Detected   | 244.4 Detected   | Uhmk1         | 0.814123917 | 0.87908061 | 1.11956024 | 1.2088869 |
| A_51_P2329 | 243.9 Detected   | 262 Detected     | 230.8 Detected   | 198.5 Detected   | Nvl           | 0.813858139 | 0.94628946 | 0.75763359 | 0.880916  |
| A_52_P5091 | 1901 Detected    | 1296.5 Detected  | 1516.2 Detected  | 1547.1 Detected  | Zfp318        | 0.813834824 | 0.79758022 | 1.19328963 | 1.1694562 |
| A_55_P2116 | 18.8 Detected    | 14.5 Not Detect  | 17.9 Detected    | 15.3 Not Detect  | Iqcd          | 0.813829787 | 0.95212766 | 1.05517241 | 1.2344828 |
| A_55_P2020 | 8918.4 Detected  | 8744 Detected    | 7245.3 Detected  | 7257.8 Detected  | Psme3         | 0.813800682 | 0.81239909 | 0.83003202 | 0.8286025 |
| A_66_P1310 | 719.1 Detected   | 540.6 Detected   | 541.9 Detected   | 585.2 Detected   | Gnl3l         | 0.813795022 | 0.75358086 | 1.08250092 | 1.0024047 |
| A_55_P1978 | 13516.1 Detected | 10663.3 Detected | 14304.4 Detected | 10999.3 Detected | Grcc10        | 0.81379244  | 1.05832304 | 1.03150995 | 1.3414609 |
| A_55_P2160 | 578.8 Detected   | 522 Detected     | 430.2 Detected   | 471 Detected     | Xylt2         | 0.813752592 | 0.74326192 | 0.90229885 | 0.8241379 |
| A_55_P2065 | 16006.4 Detected | 12828.9 Detected | 8544 Detected    | 13023.9 Detected | Smtn          | 0.813668283 | 0.53378649 | 1.01520006 | 0.6659963 |
| A_52_P4840 | 5210.9 Detected  | 3898.5 Detected  | 4753.3 Detected  | 4239.8 Detected  | Ube2v1        | 0.813640638 | 0.91218408 | 1.08754649 | 1.2192638 |
| A_55_P2057 | 15737.6 Detected | 16926.8 Detected | 13381 Detected   | 12804.3 Detected | Kansl3        | 0.813611987 | 0.85025671 | 0.75645131 | 0.7905215 |
| A_55_P2082 | 23745.5 Detected | 22641.6 Detected | 20183.6 Detected | 19319 Detected   | Zfp791        | 0.813585732 | 0.84999684 | 0.85325242 | 0.8914388 |
| A_55_P2100 | 86.9 Detected    | 86.6 Detected    | 81.7 Detected    | 70.7 Detected    | Ifna12        | 0.813578826 | 0.9401611  | 0.81639723 | 0.943418  |
| A_55_P2112 | 511.2 Detected   | 904.1 Detected   | 351.1 Detected   | 415.9 Detected   | Fam110c       | 0.8135759   | 0.68681534 | 0.46001549 | 0.388342  |
| A_55_P2166 | 11.8 Not Detect  | 18.4 Detected    | 20.1 Detected    | 9.6 Not Detect   | Gm5129        | 0.813559322 | 1.70338983 | 0.52173913 | 1.0923913 |
| A_51_P4422 | 60.6 Detected    | 43.4 Detected    | 47.9 Detected    | 49.3 Detected    | Ankrd42       | 0.813531353 | 0.79042904 | 1.1359447  | 1.1036866 |
| A_51_P3511 | 136.7 Detected   | 122.3 Detected   | 239.6 Detected   | 111.2 Detected   | Cnfn          | 0.813460132 | 1.75274323 | 0.90923957 | 1.9591169 |
| A_55_P2077 | 20543 Detected   | 15975.3 Detected | 13794.9 Detected | 16708.7 Detected | Git1          | 0.81335248  | 0.67151341 | 1.04590837 | 0.8635143 |
| A_55_P1993 | 39479.1 Detected | 36858.5 Detected | 34495 Detected   | 32104.1 Detected | Gm6994        | 0.813192297 | 0.87375345 | 0.8710094  | 0.9358764 |
| A_55_P1987 | 21159.8 Detected | 21912 Detected   | 23865.4 Detected | 17206.6 Detected | Rnu1b6        | 0.813174038 | 1.1278651  | 0.78525922 | 1.0891475 |
| A_51_P1017 | 261.7 Detected   | 278.7 Detected   | 270.7 Detected   | 212.8 Detected   | Smarcd1       | 0.813144822 | 1.03439052 | 0.76354503 | 0.9712953 |
| A_55_P2083 | 12743.2 Detected | 9535.3 Detected  | 14555.7 Detected | 10361.5 Detected | Prmt2         | 0.81310032  | 1.14223272 | 1.08664646 | 1.5265068 |
| A_55_P2125 | 14172.3 Detected | 15709.2 Detected | 13293.5 Detected | 11523.5 Detected | Cct6a         | 0.813100203 | 0.93799172 | 0.73355104 | 0.8462239 |
| A_51_P4770 | 287.8 Detected   | 189.3 Detected   | 328.1 Detected   | 234 Detected     | Rnaset2a      | 0.813064628 | 1.1400278  | 1.23613312 | 1.7332277 |
| A_51_P3671 | 47382.7 Detected | 40172.5 Detected | 49795.2 Detected | 38522.6 Detected | Psmb1         | 0.813009812 | 1.05091521 | 0.95892962 | 1.2395345 |
| A_55_P2067 | 17448.7 Detected | 16674.2 Detected | 15205.5 Detected | 14185.6 Detected | 1700110I01Rik | 0.812988933 | 0.87144028 | 0.85075146 | 0.9119178 |
| A_55_P2138 | 1046.5 Detected  | 808.2 Detected   | 766.6 Detected   | 850.7 Detected   | Lrnf1         | 0.812900143 | 0.73253703 | 1.05258599 | 0.9485276 |
| A_52_P9757 | 82.3 Detected    | 72 Detected      | 74.8 Detected    | 66.9 Detected    | Aplnr         | 0.812879708 | 0.90886999 | 0.92916667 | 1.0388889 |
| A_55_P2009 | 50747.9 Detected | 45850.2 Detected | 46448.2 Detected | 41250.2 Detected | 9530068E07Rik | 0.812845458 | 0.91527334 | 0.89967328 | 1.0130425 |
| A_52_P5462 | 81.2 Detected    | 38.1 Detected    | 48.3 Detected    | 66 Detected      | Glis3         | 0.812807882 | 0.59482759 | 1.73228346 | 1.2677165 |
| A_52_P1162 | 190.7 Detected   | 106.1 Detected   | 182.7 Detected   | 155 Detected     | Atf2          | 0.812794966 | 0.95804929 | 1.46088596 | 1.7219604 |
| A_51_P5054 | 30357.6 Detected | 19346.1 Detected | 21626.7 Detected | 24671.3 Detected | Elovl5        | 0.812689409 | 0.71239821 | 1.27525961 | 1.1178842 |
| A_55_P2031 | 12.8 Not Detect  | 29.4 Detected    | 14 Not Detect    | 10.4 Not Detect  | 9230009I02Rik | 0.8125      | 1.09375    | 0.3537415  | 0.4761905 |
| A_55_P2056 | 37877.3 Detected | 31030 Detected   | 32661.2 Detected | 30773.9 Detected | Tbca          | 0.812462874 | 0.86228955 | 0.9917467  | 1.0525685 |
| A_51_P3294 | 1140.3 Detected  | 1069.1 Detected  | 789.4 Detected   | 926.3 Detected   | Slc25a40      | 0.812330089 | 0.69227396 | 0.86642971 | 0.7383781 |

|            |                   |                  |                   |                   |               |             |            |            |           |
|------------|-------------------|------------------|-------------------|-------------------|---------------|-------------|------------|------------|-----------|
| A_55_P1969 | 102.3 Detected    | 77.4 Detected    | 29.1 Detected     | 83.1 Detected     | Epha7         | 0.812316716 | 0.28445748 | 1.07364341 | 0.375969  |
| A_51_P1736 | 43012.4 Detected  | 30919.3 Detected | 32183.5 Detected  | 34938.2 Detected  | Ptpn11        | 0.81228204  | 0.74823772 | 1.1299803  | 1.0408871 |
| A_55_P2322 | 49 Detected       | 44.5 Detected    | 44 Detected       | 39.8 Not Detect   | 4930556L07Rik | 0.812244898 | 0.89795918 | 0.89438202 | 0.988764  |
| A_55_P1971 | 5351.4 Detected   | 5603 Detected    | 5215.6 Detected   | 4346.5 Detected   | Ttc19         | 0.812217364 | 0.97462346 | 0.77574514 | 0.9308585 |
| A_55_P2183 | 21.3 Detected     | 10.7 Not Detect  | 21.6 Detected     | 17.3 Not Detect   | Cldn4         | 0.812206573 | 1.01408451 | 1.61682243 | 2.0186916 |
| A_51_P1176 | 9692.9 Detected   | 7064.2 Detected  | 9078.1 Detected   | 7871 Detected     | Rab5a         | 0.812037677 | 0.93657213 | 1.11420968 | 1.2850854 |
| A_55_P2076 | 299.5 Detected    | 252.7 Detected   | 219.9 Detected    | 243.2 Detected    | Dmtf1         | 0.812020033 | 0.73422371 | 0.96240602 | 0.8702018 |
| A_55_P2046 | 68.6 Detected     | 39.7 Detected    | 52.8 Detected     | 55.7 Detected     | Cd47          | 0.811953353 | 0.7696793  | 1.40302267 | 1.3299748 |
| A_55_P2088 | 78.7 Detected     | 73.8 Detected    | 81.6 Detected     | 63.9 Detected     | Pcnp          | 0.811944091 | 1.03684879 | 0.86585366 | 1.1056911 |
| A_52_P5181 | 732.1 Detected    | 437.1 Detected   | 645 Detected      | 594.3 Detected    | Magi3         | 0.811774348 | 0.88102718 | 1.3596431  | 1.4756349 |
| A_51_P4075 | 172.1 Detected    | 136.2 Detected   | 146.8 Detected    | 139.7 Detected    | Pdcd11        | 0.811737362 | 0.85299245 | 1.0256975  | 1.0778267 |
| A_55_P1987 | 75375.4 Detected  | 45761 Detected   | 52569.5 Detected  | 61178.4 Detected  | Capn2         | 0.811649424 | 0.69743577 | 1.33691134 | 1.1487839 |
| A_55_P2011 | 917.8 Detected    | 621.8 Detected   | 679.2 Detected    | 744.9 Detected    | Mfap1a        | 0.811614731 | 0.74003051 | 1.19797362 | 1.0923126 |
| A_55_P2198 | 207.5 Detected    | 73.3 Detected    | 367.8 Detected    | 168.4 Detected    | 4930415C11Rik | 0.811566265 | 1.77253012 | 2.29740791 | 5.0177353 |
| A_55_P2043 | 602.8 Detected    | 385.9 Detected   | 326.6 Detected    | 489.2 Detected    | Cdkl5         | 0.811546118 | 0.54180491 | 1.26768593 | 0.8463332 |
| A_55_P2037 | 3484 Detected     | 2152 Detected    | 2911.5 Detected   | 2827.4 Detected   | Brd3          | 0.811538462 | 0.83567738 | 1.31384758 | 1.3529275 |
| A_55_P1995 | 10857.9 Detected  | 10274.8 Detected | 3197.1 Detected   | 8811.5 Detected   | Fosl2         | 0.811528933 | 0.2944492  | 0.8575836  | 0.3111593 |
| A_55_P2113 | 6267.4 Detected   | 4715.6 Detected  | 7605.5 Detected   | 5085.3 Detected   | Zfp523        | 0.811389093 | 1.21350161 | 1.07839936 | 1.6128382 |
| A_52_P2700 | 2680.5 Detected   | 1810.8 Detected  | 1640.7 Detected   | 2174.8 Detected   | Tspyl2        | 0.811341168 | 0.6120873  | 1.20101613 | 0.9060636 |
| A_51_P1421 | 8987.5 Detected   | 4637.4 Detected  | 7457 Detected     | 7291.8 Detected   | Filip1l       | 0.811326843 | 0.82970793 | 1.5723897  | 1.6080131 |
| A_55_P2098 | 52135.7 Detected  | 49408 Detected   | 44982.6 Detected  | 42295.3 Detected  | Trim25        | 0.811254093 | 0.86279843 | 0.85604153 | 0.9104315 |
| A_55_P2146 | 225.7 Detected    | 195.2 Detected   | 196.8 Detected    | 183.1 Detected    | Wfdc8         | 0.811253877 | 0.87195392 | 0.9380123  | 1.0081967 |
| A_52_P2178 | 765.5 Detected    | 745.1 Detected   | 876.8 Detected    | 621 Detected      | H3f3b         | 0.811234487 | 1.14539517 | 0.83344518 | 1.1767548 |
| A_55_P2273 | 152 Detected      | 286.6 Detected   | 142.1 Detected    | 123.3 Detected    | G930009F23Rik | 0.811184211 | 0.93486842 | 0.43021633 | 0.495813  |
| A_55_P2017 | 54194.5 Detected  | 43780.8 Detected | 45740.9 Detected  | 43959.7 Detected  | Usf2          | 0.811146888 | 0.84401369 | 1.00408627 | 1.0447708 |
| A_55_P1997 | 27675.4 Detected  | 19647.2 Detected | 26559.9 Detected  | 22448.8 Detected  | Fam53a        | 0.811146361 | 0.95969345 | 1.14259538 | 1.3518415 |
| A_55_P2425 | 61.4 Detected     | 36.6 Detected    | 18.9 Detected     | 49.8 Not Detect   | C530043K16Rik | 0.811074919 | 0.30781759 | 1.36065574 | 0.5163934 |
| A_55_P2120 | 12.7 Not Detect   | 24.4 Detected    | 14.9 Not Detect   | 10.3 Not Detect   | Fanca         | 0.811023622 | 1.17322835 | 0.42213115 | 0.6106557 |
| A_66_P1083 | 343.9 Detected    | 172.8 Detected   | 276.1 Detected    | 278.9 Detected    | A330021E22Rik | 0.810991567 | 0.80284967 | 1.61400463 | 1.5978009 |
| A_51_P2918 | 9390.2 Detected   | 7128.5 Detected  | 7693.1 Detected   | 7615 Detected     | 2310033P09Rik | 0.810951843 | 0.81926903 | 1.06824718 | 1.0792032 |
| A_55_P2110 | 2670.9 Detected   | 1943.6 Detected  | 1201.5 Detected   | 2165.8 Detected   | Sifn9         | 0.810887716 | 0.44984837 | 1.11432393 | 0.6181828 |
| A_55_P2122 | 5097.3 Detected   | 4508.6 Detected  | 5221.2 Detected   | 4132.6 Detected   | Rnf25         | 0.810742942 | 1.02430699 | 0.91660382 | 1.1580535 |
| A_55_P2002 | 269378.7 Detected | 242540 Detected  | 278749.5 Detected | 218390.6 Detected | Rpl36         | 0.81071963  | 1.03478671 | 0.90043127 | 1.1492929 |
| A_55_P2112 | 11597.7 Detected  | 11305.2 Detected | 11978.7 Detected  | 9402.4 Detected   | Anapc7        | 0.810712469 | 1.03285134 | 0.83168807 | 1.0595744 |
| A_55_P2178 | 783.2 Detected    | 514.2 Detected   | 734.9 Detected    | 634.9 Detected    | Spin1         | 0.810648621 | 0.93832993 | 1.23473357 | 1.4292104 |
| A_51_P3201 | 40887.8 Detected  | 38153.9 Detected | 37349.4 Detected  | 33136.4 Detected  | Smyd2         | 0.810422669 | 0.91346074 | 0.86849313 | 0.9789143 |
| A_55_P2095 | 3659.4 Detected   | 3412.2 Detected  | 3148.2 Detected   | 2965.6 Detected   | Fdxacb1       | 0.810406077 | 0.86030497 | 0.8691167  | 0.9226306 |
| A_55_P2062 | 1720.5 Detected   | 1574.1 Detected  | 2177.1 Detected   | 1394.3 Detected   | Caprin2       | 0.810403952 | 1.26538797 | 0.885776   | 1.383076  |
| A_55_P2101 | 20517.9 Detected  | 21614.5 Detected | 29113.5 Detected  | 16626.3 Detected  | Aldh7a1       | 0.810331467 | 1.41893176 | 0.76921974 | 1.346943  |
| A_55_P1982 | 1449.8 Detected   | 1285.9 Detected  | 1356.7 Detected   | 1174.8 Detected   | Rbfox2        | 0.810318665 | 0.93578425 | 0.91360137 | 1.0550587 |

|            |         |            |         |            |         |            |         |            |               |             |            |            |           |
|------------|---------|------------|---------|------------|---------|------------|---------|------------|---------------|-------------|------------|------------|-----------|
| A_66_P1117 | 2375.5  | Detected   | 3248.6  | Detected   | 2398.2  | Detected   | 1924.9  | Detected   | Utp20         | 0.810313618 | 1.00955588 | 0.59253217 | 0.7382257 |
| A_52_P6495 | 127.5   | Detected   | 34.2    | Detected   | 24.6    | Detected   | 103.3   | Detected   | Heg1          | 0.810196078 | 0.19294118 | 3.02046784 | 0.7192982 |
| A_55_P2334 | 53.2    | Detected   | 38.9    | Detected   | 69      | Detected   | 43.1    | Detected   | D630024D03Rik | 0.810150376 | 1.29699248 | 1.10796915 | 1.7737789 |
| A_51_P2418 | 4572.9  | Detected   | 4232.5  | Detected   | 6560.7  | Detected   | 3704.4  | Detected   | Tcirg1        | 0.810076757 | 1.43469133 | 0.87522741 | 1.5500768 |
| A_55_P2114 | 258.4   | Detected   | 192.3   | Detected   | 274.1   | Detected   | 209.3   | Detected   | Cadm4         | 0.80998452  | 1.06075851 | 1.08840354 | 1.425377  |
| A_55_P2121 | 3956.8  | Detected   | 2756.8  | Detected   | 3192    | Detected   | 3204.3  | Detected   | Tbc1d22b      | 0.809821068 | 0.80671249 | 1.16232589 | 1.1578642 |
| A_55_P2063 | 118.3   | Detected   | 82.8    | Detected   | 123.6   | Detected   | 95.8    | Detected   | Tomm6         | 0.809805579 | 1.04480135 | 1.15700483 | 1.4927536 |
| A_65_P1253 | 302.3   | Detected   | 203.1   | Detected   | 217.3   | Detected   | 244.8   | Detected   | Pde4d         | 0.809791598 | 0.71882236 | 1.20531758 | 1.0699163 |
| A_55_P2173 | 592.3   | Detected   | 582.4   | Detected   | 423.4   | Detected   | 479.6   | Detected   | Zfp62         | 0.809724802 | 0.71484045 | 0.82348901 | 0.7269918 |
| A_52_P1073 | 2311.6  | Detected   | 1709.3  | Detected   | 1738.5  | Detected   | 1871.5  | Detected   | Map6          | 0.80961239  | 0.75207648 | 1.09489265 | 1.017083  |
| A_55_P1995 | 1523.7  | Detected   | 1022.3  | Detected   | 1573.5  | Detected   | 1233.6  | Detected   | Gm14432       | 0.809608191 | 1.0326836  | 1.2066908  | 1.5391764 |
| A_55_P2070 | 14754.3 | Detected   | 12441   | Detected   | 18568.2 | Detected   | 11944.3 | Detected   | Nudt5         | 0.809547047 | 1.25849413 | 0.96007556 | 1.4925006 |
| A_51_P4041 | 641.6   | Detected   | 1002.4  | Detected   | 143.9   | Detected   | 519.4   | Detected   | Fmnl1         | 0.809538653 | 0.22428304 | 0.51815642 | 0.1435555 |
| A_55_P2289 | 10.5    | Not Detect | 14.6    | Not Detect | 39.5    | Detected   | 8.5     | Not Detect | AI429363      | 0.80952381  | 3.76190476 | 0.58219178 | 2.7054795 |
| A_51_P1421 | 12110   | Detected   | 10835.9 | Detected   | 11059.2 | Detected   | 9803    | Detected   | Abhd11        | 0.809496284 | 0.91322874 | 0.90467797 | 1.0206074 |
| A_51_P1373 | 11995.3 | Detected   | 4573.2  | Detected   | 9922.1  | Detected   | 9709.2  | Detected   | Zadh2         | 0.809417022 | 0.82716564 | 2.12306481 | 2.1696186 |
| A_52_P7963 | 11625.3 | Detected   | 5415.6  | Detected   | 6563.1  | Detected   | 9409.3  | Detected   | Vat1          | 0.809381263 | 0.56455317 | 1.73744368 | 1.2118879 |
| A_52_P3443 | 1739.5  | Detected   | 1371.8  | Detected   | 1470.7  | Detected   | 1407.9  | Detected   | Eif4a2        | 0.809370509 | 0.84547284 | 1.02631579 | 1.0720951 |
| A_55_P2011 | 7977.1  | Detected   | 5945.7  | Detected   | 6273.5  | Detected   | 6455.7  | Detected   | Armc10        | 0.809279061 | 0.78643868 | 1.08577628 | 1.0551323 |
| A_55_P2018 | 809.9   | Detected   | 878.5   | Detected   | 607.7   | Detected   | 655.4   | Detected   | Elk3          | 0.809235708 | 0.75033955 | 0.74604439 | 0.6917473 |
| A_55_P1967 | 1589.1  | Detected   | 630.5   | Detected   | 2089.1  | Detected   | 1285.9  | Detected   | AI661453      | 0.809200176 | 1.31464351 | 2.03949247 | 3.3134021 |
| A_55_P2183 | 6187.2  | Detected   | 3002.8  | Detected   | 5202.4  | Detected   | 5006.6  | Detected   | Ncoa3         | 0.809186708 | 0.84083269 | 1.66731051 | 1.7325163 |
| A_55_P1971 | 1301.9  | Detected   | 1103.4  | Detected   | 1197.2  | Detected   | 1053.3  | Detected   | Rbm45         | 0.809048314 | 0.91957908 | 0.95459489 | 1.08501   |
| A_52_P8783 | 3909.5  | Detected   | 2356.9  | Detected   | 1667    | Detected   | 3162.5  | Detected   | Sema3c        | 0.808926973 | 0.42639724 | 1.34180491 | 0.707285  |
| A_55_P1956 | 13177.8 | Detected   | 9992.7  | Detected   | 16434.3 | Detected   | 10659.8 | Detected   | Dcaf8         | 0.808921064 | 1.24712016 | 1.06675873 | 1.6446306 |
| A_52_P2086 | 7926.5  | Detected   | 6734.5  | Detected   | 6876.9  | Detected   | 6411.7  | Detected   | Fancb         | 0.808894216 | 0.86758342 | 0.95206771 | 1.0211449 |
| A_55_P2032 | 1779.1  | Detected   | 1038.1  | Detected   | 1578.5  | Detected   | 1439.1  | Detected   | Dnajc10       | 0.808892136 | 0.88724636 | 1.38628263 | 1.5205664 |
| A_55_P2302 | 13.6    | Not Detect | 21.8    | Detected   | 8.2     | Not Detect | 11      | Not Detect | E230012P03    | 0.808823529 | 0.60294118 | 0.50458716 | 0.3761468 |
| A_55_P1960 | 349.4   | Detected   | 284.5   | Detected   | 244.1   | Detected   | 282.6   | Detected   | Msh3          | 0.808815112 | 0.69862622 | 0.99332162 | 0.8579965 |
| A_55_P2423 | 67154.1 | Detected   | 65339.7 | Detected   | 60255.5 | Detected   | 54310.6 | Detected   | Eya1          | 0.808745855 | 0.8972721  | 0.83120369 | 0.9221882 |
| A_52_P5222 | 2099.8  | Detected   | 2008.3  | Detected   | 1898.1  | Detected   | 1698.1  | Detected   | 3110067C02Rik | 0.808696066 | 0.90394323 | 0.845541   | 0.9451277 |
| A_55_P1999 | 11.5    | Not Detect | 25.5    | Detected   | 3.4     | Not Detect | 9.3     | Not Detect | Spopl         | 0.808695652 | 0.29565217 | 0.36470588 | 0.1333333 |
| A_55_P1993 | 1643.7  | Detected   | 1317.7  | Detected   | 1144    | Detected   | 1329.2  | Detected   | Dusp7         | 0.808663381 | 0.69599075 | 1.00872733 | 0.8681794 |
| A_55_P1968 | 35255.1 | Detected   | 33156.8 | Detected   | 29407   | Detected   | 28507.6 | Detected   | Synpo2l       | 0.808609251 | 0.83412045 | 0.8597814  | 0.8869071 |
| A_55_P2099 | 37341.4 | Detected   | 29170.5 | Detected   | 37992.9 | Detected   | 30191.9 | Detected   | H2afv         | 0.808536905 | 1.01744712 | 1.03501483 | 1.3024425 |
| A_55_P2062 | 74129.3 | Detected   | 48650.8 | Detected   | 69487.5 | Detected   | 59935.5 | Detected   | Tsen34        | 0.808526453 | 0.93738238 | 1.23195302 | 1.428291  |
| A_55_P2123 | 234.9   | Detected   | 129.7   | Detected   | 97      | Detected   | 189.9   | Detected   | LOC101056077  | 0.808429119 | 0.41294168 | 1.46414803 | 0.7478797 |
| A_55_P2084 | 21.4    | Detected   | 13.1    | Not Detect | 18.8    | Detected   | 17.3    | Not Detect | Rbm18         | 0.808411215 | 0.87850467 | 1.32061069 | 1.4351145 |
| A_55_P2006 | 176.4   | Detected   | 142.5   | Detected   | 177.4   | Detected   | 142.6   | Detected   | Dpy19I4       | 0.808390023 | 1.00566893 | 1.00070175 | 1.2449123 |
| A_55_P2186 | 6041    | Detected   | 5270.5  | Detected   | 4192.7  | Detected   | 4883.1  | Detected   | Bard1         | 0.808326436 | 0.69404072 | 0.92649654 | 0.7955033 |

|            |          |          |          |            |          |            |          |            |               |                   |            |            |           |
|------------|----------|----------|----------|------------|----------|------------|----------|------------|---------------|-------------------|------------|------------|-----------|
| A_51_P4638 | 335.9    | Detected | 288.7    | Detected   | 253.9    | Detected   | 271.5    | Detected   | Baz1b         | 0.808276273       | 0.75587973 | 0.94042258 | 0.8794596 |
| A_55_P2094 | 33.9     | Detected | 19.8     | Detected   | 27.4     | Detected   | 27.4     | Not Detect | Gm15800       | 0.808259587       | 0.80825959 | 1.38383838 | 1.3838384 |
| A_55_P2128 | 335.8    | Detected | 318.9    | Detected   | 323.9    | Detected   | 271.4    | Detected   | Cep85         | 0.808219178       | 0.96456224 | 0.85105049 | 1.0156789 |
| A_55_P2011 | 6425.1   | Detected | 4562.1   | Detected   | 5584.9   | Detected   | 5190.6   | Detected   | Anapc5        | 0.807862913       | 0.86923161 | 1.1377655  | 1.224195  |
| A_55_P2046 | 60424.4  | Detected | 55873.7  | Detected   | 51171.5  | Detected   | 48813.5  | Detected   | Tmem239       | 0.807844182       | 0.84686815 | 0.87364001 | 0.9158423 |
| A_55_P2020 | 260714.8 | Detected | 207151.9 | Detected   | 181650.8 | Detected   | 210604.6 | Detected   | Pcolce        | 0.807796872       | 0.69674142 | 1.01666748 | 0.8768966 |
| A_51_P2276 | 15.6     | Detected | 12.7     | Not Detect | 8.1      | Not Detect | 12.6     | Not Detect | Dnah7a        | 0.807692308       | 0.51923077 | 0.99212598 | 0.6377953 |
| A_55_P2022 | 1664.4   | Detected | 2123.5   | Detected   | 192.6    | Detected   | 1344.3   | Detected   | Pak3          | 0.807678443       | 0.11571738 | 0.63305863 | 0.0906993 |
| A_55_P2042 | 15847.2  | Detected | 11347.5  | Detected   | 14720.4  | Detected   | 12799    | Detected   | Rfwd2         | 0.807650563       | 0.92889596 | 1.12791364 | 1.2972373 |
| A_65_P1913 | 9057.2   | Detected | 6521.2   | Detected   | 8521.7   | Detected   | 7314.9   | Detected   |               | 7-Mar 0.807633706 | 0.94087577 | 1.12171073 | 1.3067687 |
| A_55_P2123 | 4757.9   | Detected | 2393.4   | Detected   | 879.9    | Detected   | 3842.1   | Detected   | Trnp1         | 0.807520124       | 0.18493453 | 1.60528955 | 0.367636  |
| A_52_P2646 | 1305.9   | Detected | 1504.1   | Detected   | 956.5    | Detected   | 1054.5   | Detected   | Cyb5d1        | 0.807489088       | 0.73244506 | 0.7010837  | 0.6359285 |
| A_52_P2355 | 9679.1   | Detected | 9546.2   | Detected   | 9432.4   | Detected   | 7815.4   | Detected   | Ipo5          | 0.807451106       | 0.97451209 | 0.81869225 | 0.988079  |
| A_55_P2054 | 70715.1  | Detected | 66031.4  | Detected   | 61673.7  | Detected   | 57091.2  | Detected   | Ldlrad3       | 0.807341006       | 0.87214329 | 0.86460684 | 0.9340056 |
| A_51_P2709 | 21.8     | Detected | 10.1     | Not Detect | 51.6     | Detected   | 17.6     | Not Detect | Plekhs1       | 0.80733945        | 2.36697248 | 1.74257426 | 5.1089109 |
| A_66_P1043 | 6846.2   | Detected | 4620.1   | Detected   | 5274.5   | Detected   | 5527.1   | Detected   | Arl3          | 0.807323771       | 0.77042739 | 1.1963161  | 1.141642  |
| A_51_P2324 | 1212.6   | Detected | 724.5    | Detected   | 1049.3   | Detected   | 978.9    | Detected   | Zswim1        | 0.807273627       | 0.86533069 | 1.35113872 | 1.4483092 |
| A_55_P2094 | 121.3    | Detected | 81.5     | Detected   | 77       | Detected   | 97.9     | Detected   | Gm15800       | 0.80708986        | 0.63478978 | 1.20122699 | 0.9447853 |
| A_55_P2128 | 17.1     | Detected | 21.1     | Detected   | 23.9     | Detected   | 13.8     | Not Detect | 5830411N06Rik | 0.807017544       | 1.39766082 | 0.65402844 | 1.1327014 |
| A_52_P3719 | 445.5    | Detected | 328.9    | Detected   | 643.5    | Detected   | 359.5    | Detected   | Eif6          | 0.806958474       | 1.44444444 | 1.0930374  | 1.9565217 |
| A_51_P4876 | 6055.3   | Detected | 3665.2   | Detected   | 4275     | Detected   | 4886.3   | Detected   | Dtnbp1        | 0.806945981       | 0.7059931  | 1.33316054 | 1.1663756 |
| A_55_P2040 | 70584.3  | Detected | 67159.3  | Detected   | 61649.3  | Detected   | 56955.9  | Detected   | Ung           | 0.806920236       | 0.87341378 | 0.84807167 | 0.9179563 |
| A_52_P2935 | 1593.1   | Detected | 1256.9   | Detected   | 1236.1   | Detected   | 1285.5   | Detected   | Wdr41         | 0.806917331       | 0.77590861 | 1.0227544  | 0.9834513 |
| A_55_P2018 | 1724.5   | Detected | 1269     | Detected   | 1334.8   | Detected   | 1391.4   | Detected   | A730008H23Rik | 0.806842563       | 0.77402146 | 1.0964539  | 1.0518519 |
| A_55_P1956 | 2805.3   | Detected | 1844     | Detected   | 2581.7   | Detected   | 2263.3   | Detected   | Gm14391       | 0.806794282       | 0.92029373 | 1.22738612 | 1.4000542 |
| A_55_P2137 | 1569.1   | Detected | 1255.8   | Detected   | 1566.2   | Detected   | 1265.9   | Detected   | Nmral1        | 0.806768211       | 0.99815181 | 1.00804268 | 1.2471731 |
| A_55_P2126 | 1311.2   | Detected | 1376.1   | Detected   | 1062.2   | Detected   | 1057.8   | Detected   | 1810032O08Rik | 0.806741916       | 0.81009762 | 0.76869414 | 0.7718916 |
| A_51_P1003 | 44.5     | Detected | 46.4     | Detected   | 31.7     | Detected   | 35.9     | Not Detect | Zfp407        | 0.806741573       | 0.71235955 | 0.7737069  | 0.6831897 |
| A_51_P4826 | 18244.5  | Detected | 15118.7  | Detected   | 17786.4  | Detected   | 14716.5  | Detected   | Rps6ka4       | 0.806626655       | 0.97489106 | 0.97339718 | 1.1764504 |
| A_55_P2003 | 63.6     | Detected | 49.1     | Detected   | 48.6     | Detected   | 51.3     | Detected   | Phf8          | 0.806603774       | 0.76415094 | 1.04480652 | 0.9898167 |
| A_55_P1970 | 5221     | Detected | 4084.1   | Detected   | 4633.6   | Detected   | 4210.9   | Detected   | Bcl7b         | 0.806531316       | 0.88749282 | 1.03104723 | 1.1345462 |
| A_55_P2386 | 27.9     | Detected | 22.7     | Detected   | 22.6     | Detected   | 22.5     | Not Detect | Gm9958        | 0.806451613       | 0.81003584 | 0.99118943 | 0.9955947 |
| A_52_P2724 | 925.3    | Detected | 751.2    | Detected   | 855.1    | Detected   | 746.2    | Detected   | Mapk9         | 0.806441154       | 0.92413271 | 0.99334398 | 1.138312  |
| A_51_P1536 | 270.7    | Detected | 282.8    | Detected   | 281.2    | Detected   | 218.3    | Detected   | Utp14b        | 0.80642778        | 1.03878833 | 0.77192362 | 0.9943423 |
| A_55_P1992 | 68156.7  | Detected | 44216.3  | Detected   | 57041.7  | Detected   | 54961.2  | Detected   | Dync1i2       | 0.806394676       | 0.83691992 | 1.24300767 | 1.2900605 |
| A_55_P2118 | 60925.8  | Detected | 33895.4  | Detected   | 44286    | Detected   | 49128.4  | Detected   | Idh2          | 0.806364463       | 0.72688418 | 1.44941201 | 1.306549  |
| A_55_P2059 | 11281.3  | Detected | 7780.3   | Detected   | 9860.5   | Detected   | 9093.5   | Detected   | Dgkz          | 0.80606845        | 0.87405707 | 1.16878527 | 1.2673676 |
| A_55_P2075 | 1621.1   | Detected | 1531.9   | Detected   | 1393.4   | Detected   | 1306.7   | Detected   | Arfrp1        | 0.806057615       | 0.85953982 | 0.85299302 | 0.9095894 |
| A_55_P2152 | 29.9     | Detected | 34.5     | Detected   | 31.6     | Detected   | 24.1     | Not Detect | Cyp4a12b      | 0.806020067       | 1.05685619 | 0.69855072 | 0.915942  |
| A_51_P3149 | 4027.7   | Detected | 3247.6   | Detected   | 3658.5   | Detected   | 3246.4   | Detected   | Dbf4          | 0.806018323       | 0.90833478 | 0.9996305  | 1.1265242 |

|            |                   |                   |                   |                   |               |             |            |            |           |
|------------|-------------------|-------------------|-------------------|-------------------|---------------|-------------|------------|------------|-----------|
| A_55_P2047 | 23.7 Detected     | 23.1 Detected     | 20.8 Detected     | 19.1 Not Detect   | Sel1l2        | 0.805907173 | 0.87763713 | 0.82683983 | 0.9004329 |
| A_55_P2409 | 247.7 Detected    | 146.4 Detected    | 104.2 Detected    | 199.6 Detected    | BB163080      | 0.805813484 | 0.42067017 | 1.36338798 | 0.7117486 |
| A_55_P1985 | 13.9 Not Detect   | 28 Detected       | 3.3 Not Detect    | 11.2 Not Detect   | Xpnpep2       | 0.805755396 | 0.23741007 | 0.4        | 0.1178571 |
| A_55_P2133 | 167.7 Detected    | 79.9 Detected     | 94.4 Detected     | 135.1 Detected    | Rin3          | 0.805605247 | 0.56290996 | 1.69086358 | 1.1814768 |
| A_55_P2096 | 589 Detected      | 735.8 Detected    | 394.2 Detected    | 474.5 Detected    | Steap3        | 0.805602716 | 0.66926995 | 0.64487633 | 0.5357434 |
| A_51_P4902 | 9189.6 Detected   | 4822.2 Detected   | 7216.3 Detected   | 7402.5 Detected   | Slx4          | 0.805530165 | 0.78526813 | 1.53508772 | 1.4964746 |
| A_55_P2063 | 39807.6 Detected  | 31083.7 Detected  | 39222.5 Detected  | 32064.2 Detected  | Bag6          | 0.805479356 | 0.9853018  | 1.03154386 | 1.261835  |
| A_55_P1957 | 22.1 Detected     | 18.1 Detected     | 30.7 Detected     | 17.8 Not Detect   | Olfir702      | 0.805429864 | 1.38914027 | 0.98342541 | 1.6961326 |
| A_55_P2023 | 19 Detected       | 20.2 Detected     | 13 Not Detect     | 15.3 Not Detect   | Ptpre         | 0.805263158 | 0.68421053 | 0.75742574 | 0.6435644 |
| A_52_P7603 | 31803.2 Detected  | 27467.6 Detected  | 25842.9 Detected  | 25609.8 Detected  | Rcc2          | 0.80525859  | 0.81258804 | 0.93236395 | 0.9408503 |
| A_55_P2451 | 2854.6 Detected   | 1945.4 Detected   | 2155.5 Detected   | 2298.6 Detected   | Pdpk1         | 0.805226652 | 0.75509704 | 1.18155649 | 1.1079984 |
| A_55_P2404 | 176.6 Detected    | 190.6 Detected    | 84.3 Detected     | 142.2 Detected    | Gm17501       | 0.805209513 | 0.47734994 | 0.74606506 | 0.4422875 |
| A_52_P6306 | 4055.7 Detected   | 5027.5 Detected   | 3613.7 Detected   | 3265.5 Detected   | Rcbtb2        | 0.805163104 | 0.89101758 | 0.6495276  | 0.7187867 |
| A_66_P1294 | 48348 Detected    | 40069.2 Detected  | 49352.7 Detected  | 38925.2 Detected  | Cox7a2l       | 0.805104658 | 1.02078059 | 0.97144939 | 1.2316867 |
| A_55_P1978 | 11.8 Not Detect   | 16.5 Not Detect   | 18 Detected       | 9.5 Not Detect    | Enox1         | 0.805084746 | 1.52542373 | 0.57575758 | 1.0909091 |
| A_66_P1391 | 7543.3 Detected   | 5008.6 Detected   | 5674.5 Detected   | 6072.9 Detected   | Safb          | 0.805072051 | 0.75225697 | 1.21249451 | 1.1329513 |
| A_66_P1182 | 9026.1 Detected   | 8812.6 Detected   | 7072.1 Detected   | 7266.3 Detected   | Strn3         | 0.805032074 | 0.78351669 | 0.82453532 | 0.8024987 |
| A_65_P1857 | 268.1 Detected    | 222.4 Detected    | 174 Detected      | 215.8 Detected    | Tardbp        | 0.804923536 | 0.64901156 | 0.97032374 | 0.7823741 |
| A_55_P2172 | 957.7 Detected    | 800.7 Detected    | 842.7 Detected    | 770.7 Detected    | Srbd1         | 0.804740524 | 0.87992064 | 0.96253278 | 1.0524541 |
| A_55_P2133 | 12.8 Not Detect   | 22.4 Detected     | 17.7 Not Detect   | 10.3 Not Detect   | Susd3         | 0.8046875   | 1.3828125  | 0.45982143 | 0.7901786 |
| A_55_P2077 | 21983.6 Detected  | 25906 Detected    | 19430.9 Detected  | 17689.5 Detected  | Ube2e1        | 0.804668025 | 0.88388162 | 0.68283409 | 0.750054  |
| A_55_P2058 | 5168.9 Detected   | 3634.7 Detected   | 2531.4 Detected   | 4158.9 Detected   | Mex3d         | 0.804600592 | 0.48973669 | 1.14422098 | 0.6964536 |
| A_55_P2217 | 26.1 Detected     | 41.2 Detected     | 21.2 Detected     | 21 Not Detect     | A830082N09Rik | 0.804597701 | 0.81226054 | 0.50970874 | 0.5145631 |
| A_55_P2099 | 3692.2 Detected   | 2602.1 Detected   | 2119.6 Detected   | 2970.7 Detected   | Tfe3          | 0.80458805  | 0.57407508 | 1.14165482 | 0.8145728 |
| A_55_P2135 | 179796.7 Detected | 155699.8 Detected | 185934.9 Detected | 144636.5 Detected | Rps18         | 0.804444687 | 1.03413967 | 0.92894467 | 1.1941884 |
| A_66_P1012 | 240.3 Detected    | 226.2 Detected    | 250.7 Detected    | 193.3 Detected    | Chmp3         | 0.804411153 | 1.04327923 | 0.85455349 | 1.1083112 |
| A_66_P1196 | 854.3 Detected    | 569.6 Detected    | 594 Detected      | 687.2 Detected    | Atrx          | 0.804401264 | 0.6953061  | 1.20646067 | 1.0428371 |
| A_51_P4511 | 55840.5 Detected  | 42794.5 Detected  | 45419.3 Detected  | 44917 Detected    | Ube2c         | 0.804380333 | 0.8133756  | 1.0495975  | 1.061335  |
| A_51_P1150 | 6779.7 Detected   | 6150.8 Detected   | 5659.9 Detected   | 5453 Detected     | Nup153        | 0.804312875 | 0.83483045 | 0.88655134 | 0.9201892 |
| A_55_P2097 | 50739.4 Detected  | 48404.6 Detected  | 42048.5 Detected  | 40805.3 Detected  | Ifitm7        | 0.804213294 | 0.82871496 | 0.84300459 | 0.8686881 |
| A_52_P6189 | 303.8 Detected    | 297.2 Detected    | 285.2 Detected    | 244.3 Detected    | Sf1           | 0.804147465 | 0.93877551 | 0.82200538 | 0.9596231 |
| A_52_P1761 | 2940.5 Detected   | 2505.8 Detected   | 2646.5 Detected   | 2364.5 Detected   | Ahcy          | 0.804114946 | 0.900017   | 0.94361082 | 1.0561497 |
| A_52_P1064 | 15815.6 Detected  | 9605 Detected     | 9863.1 Detected   | 12716 Detected    | Jak1          | 0.804016288 | 0.6236311  | 1.32389381 | 1.0268714 |
| A_55_P2122 | 331.6 Detected    | 296.2 Detected    | 336.9 Detected    | 266.6 Detected    | Dcp2          | 0.8039807   | 1.01598311 | 0.90006752 | 1.1374072 |
| A_55_P1978 | 7145.2 Detected   | 5176.1 Detected   | 5729 Detected     | 5743.8 Detected   | Pja2          | 0.803868331 | 0.80179701 | 1.10967717 | 1.1068179 |
| A_55_P2066 | 1355.1 Detected   | 1127.2 Detected   | 1401.9 Detected   | 1089.3 Detected   | A230045G11Rik | 0.803852114 | 1.0345362  | 0.96637686 | 1.2437012 |
| A_55_P2059 | 1498.7 Detected   | 963.5 Detected    | 1260.6 Detected   | 1204.6 Detected   | Zfp457        | 0.803763261 | 0.84112898 | 1.25023352 | 1.308355  |
| A_55_P1985 | 54 Detected       | 36.3 Detected     | 24.5 Detected     | 43.4 Not Detect   | Phc3          | 0.803703704 | 0.4537037  | 1.19559229 | 0.6749311 |
| A_55_P2147 | 48175.3 Detected  | 34224.6 Detected  | 44089.1 Detected  | 38717.8 Detected  | Ranbp1        | 0.803685706 | 0.9151806  | 1.13128568 | 1.2882284 |
| A_51_P1166 | 1826.9 Detected   | 971 Detected      | 1279.6 Detected   | 1468.1 Detected   | A330021E22Rik | 0.80360173  | 0.70042148 | 1.51194645 | 1.3178167 |

|            |                  |                  |                  |                  |               |             |            |            |           |
|------------|------------------|------------------|------------------|------------------|---------------|-------------|------------|------------|-----------|
| A_52_P4206 | 384.8 Detected   | 331.6 Detected   | 296.2 Detected   | 309.2 Detected   | Klhl11        | 0.803534304 | 0.76975052 | 0.93244873 | 0.8932449 |
| A_55_P2047 | 108.9 Detected   | 68.3 Detected    | 84.6 Detected    | 87.5 Detected    | Spatc11       | 0.80348944  | 0.7768595  | 1.28111274 | 1.238653  |
| A_55_P2064 | 57.5 Detected    | 50 Detected      | 42.1 Detected    | 46.2 Not Detect  | Pced1a        | 0.803478261 | 0.73217391 | 0.924      | 0.842     |
| A_55_P2129 | 5868 Detected    | 4086.3 Detected  | 3511.6 Detected  | 4714.6 Detected  | Mybl2         | 0.803442399 | 0.59843217 | 1.15375768 | 0.8593593 |
| A_52_P6409 | 23.4 Detected    | 12.4 Not Detect  | 16.5 Detected    | 18.8 Not Detect  | Dcdc2a        | 0.803418803 | 0.70512821 | 1.51612903 | 1.3306452 |
| A_51_P4553 | 819.1 Detected   | 641.1 Detected   | 769.4 Detected   | 658 Detected     | Ankrd27       | 0.803320718 | 0.93932365 | 1.02636094 | 1.2001248 |
| A_55_P2080 | 163.1 Detected   | 98.4 Detected    | 120.9 Detected   | 131 Detected     | Rbm41         | 0.803188228 | 0.74126303 | 1.33130081 | 1.2286585 |
| A_55_P2016 | 810.3 Detected   | 623.1 Detected   | 738.8 Detected   | 650.8 Detected   | A530054K11Rik | 0.803159324 | 0.91176108 | 1.04445514 | 1.1856845 |
| A_55_P2032 | 2634.4 Detected  | 2117.3 Detected  | 2555.3 Detected  | 2115.6 Detected  | Tbp           | 0.803067112 | 0.96997419 | 0.99919709 | 1.2068672 |
| A_51_P5188 | 66.5 Detected    | 61.9 Detected    | 63.6 Detected    | 53.4 Detected    | Fev           | 0.803007519 | 0.95639098 | 0.86268174 | 1.0274637 |
| A_55_P1992 | 13.7 Not Detect  | 17.2 Not Detect  | 69.8 Detected    | 11 Not Detect    | AY358078      | 0.802919708 | 5.09489051 | 0.63953488 | 4.0581395 |
| A_55_P2062 | 35028.7 Detected | 33417.7 Detected | 29093.4 Detected | 28123 Detected   | Epha5         | 0.802855944 | 0.83055894 | 0.84156001 | 0.8705985 |
| A_51_P4848 | 14261.2 Detected | 13024.8 Detected | 11735.2 Detected | 11449 Detected   | Ppm1g         | 0.802807618 | 0.82287606 | 0.87901542 | 0.9009889 |
| A_65_P1495 | 702.8 Detected   | 432.7 Detected   | 384.1 Detected   | 564.2 Detected   | Cblb          | 0.802788845 | 0.54652817 | 1.30390571 | 0.887682  |
| A_55_P2021 | 267.6 Detected   | 251.7 Detected   | 207 Detected     | 214.8 Detected   | E130308A19Rik | 0.802690583 | 0.7735426  | 0.8533969  | 0.8224076 |
| A_66_P1395 | 90.2 Detected    | 80.1 Detected    | 84.9 Detected    | 72.4 Detected    | Gm813         | 0.802660754 | 0.94124169 | 0.90387016 | 1.0599251 |
| A_55_P2142 | 6907.9 Detected  | 4080.8 Detected  | 9164.4 Detected  | 5544.7 Detected  | Glul          | 0.802660722 | 1.32665499 | 1.35872868 | 2.2457361 |
| A_55_P2185 | 1252.1 Detected  | 1040.8 Detected  | 938 Detected     | 1005 Detected    | Gm10914       | 0.802651545 | 0.74914144 | 0.96560338 | 0.9012298 |
| A_51_P3752 | 2638.7 Detected  | 2012 Detected    | 1678.8 Detected  | 2117.9 Detected  | Plk3          | 0.802630083 | 0.63622238 | 1.05263419 | 0.8343936 |
| A_55_P1988 | 27006.5 Detected | 17888.9 Detected | 26301.9 Detected | 21675.8 Detected | Stard7        | 0.802614185 | 0.97390998 | 1.21168993 | 1.4702916 |
| A_55_P2187 | 21140.5 Detected | 29025.4 Detected | 26929.4 Detected | 16967.5 Detected | Pop1          | 0.802606372 | 1.27382985 | 0.5845742  | 0.9277874 |
| A_51_P4725 | 439.7 Detected   | 344.4 Detected   | 394.2 Detected   | 352.9 Detected   | Arsk          | 0.802592677 | 0.89652035 | 1.0246806  | 1.1445993 |
| A_66_P1313 | 199.5 Detected   | 12.1 Not Detect  | 2052.5 Detected  | 160.1 Detected   | Ugt2b38       | 0.802506266 | 10.2882206 | 13.231405  | 169.6281  |
| A_55_P2119 | 35517.2 Detected | 26282.5 Detected | 36049.5 Detected | 28500 Detected   | Set           | 0.802428119 | 1.0149871  | 1.08437173 | 1.3716161 |
| A_52_P3426 | 169 Detected     | 158.1 Detected   | 115.9 Detected   | 135.6 Detected   | Prss33        | 0.802366864 | 0.68579882 | 0.85768501 | 0.7330803 |
| A_55_P2471 | 1596.9 Detected  | 1226.2 Detected  | 1861.7 Detected  | 1281.2 Detected  | Snap23        | 0.802304465 | 1.16582128 | 1.04485402 | 1.5182678 |
| A_55_P2014 | 38040.9 Detected | 26244.2 Detected | 31544.7 Detected | 30519.2 Detected | Zfp771        | 0.802273343 | 0.82923117 | 1.16289313 | 1.2019684 |
| A_66_P1280 | 121.8 Detected   | 114.5 Detected   | 171.5 Detected   | 97.7 Detected    | AI846148      | 0.802134647 | 1.40804598 | 0.85327511 | 1.4978166 |
| A_55_P1980 | 151.1 Detected   | 138.7 Detected   | 186.9 Detected   | 121.2 Detected   | Gm10334       | 0.802117803 | 1.23692919 | 0.87382841 | 1.3475126 |
| A_55_P2028 | 7435.5 Detected  | 5246 Detected    | 6774.3 Detected  | 5964.1 Detected  | Atg13         | 0.802111492 | 0.91107525 | 1.13688525 | 1.2913267 |
| A_52_P2735 | 11650.1 Detected | 10601.3 Detected | 10380.2 Detected | 9344.4 Detected  | Zc3h14        | 0.802087536 | 0.89099664 | 0.88143907 | 0.9791441 |
| A_66_P1296 | 9461.3 Detected  | 6652.9 Detected  | 8862.9 Detected  | 7588.3 Detected  | 4930453N24Rik | 0.802035661 | 0.93675288 | 1.14060034 | 1.332186  |
| A_52_P5796 | 13810 Detected   | 13528.1 Detected | 9407.3 Detected  | 11075.6 Detected | Rrs1          | 0.801998552 | 0.68119479 | 0.81871068 | 0.6953896 |
| A_51_P2086 | 20.2 Detected    | 10.6 Not Detect  | 8.6 Not Detect   | 16.2 Not Detect  | Dio2          | 0.801980198 | 0.42574257 | 1.52830189 | 0.8113208 |
| A_55_P2032 | 105 Detected     | 108 Detected     | 125.8 Detected   | 84.2 Detected    | Sfxn5         | 0.801904762 | 1.19809524 | 0.77962963 | 1.1648148 |
| A_55_P2170 | 73.7 Detected    | 56.9 Detected    | 67.9 Detected    | 59.1 Detected    | Chchd2        | 0.801899593 | 0.92130258 | 1.03866432 | 1.1933216 |
| A_55_P2135 | 428.7 Detected   | 399.2 Detected   | 121.3 Detected   | 343.7 Detected   | Sifn10-ps     | 0.801726149 | 0.28294845 | 0.86097194 | 0.3038577 |
| A_55_P2086 | 23.7 Detected    | 24.1 Detected    | 27.1 Detected    | 19 Not Detect    | Phldb3        | 0.801687764 | 1.14345992 | 0.78838174 | 1.1244813 |
| A_55_P1996 | 6607.5 Detected  | 5153.6 Detected  | 5428.6 Detected  | 5296.4 Detected  | Zfp936        | 0.801573969 | 0.82158154 | 1.02770879 | 1.0533608 |
| A_55_P2356 | 103.3 Detected   | 46.3 Detected    | 60.2 Detected    | 82.8 Detected    | 6720483E21Rik | 0.801548887 | 0.58276864 | 1.78833693 | 1.300216  |

|            |          |            |         |          |          |            |         |            |               |             |            |            |           |
|------------|----------|------------|---------|----------|----------|------------|---------|------------|---------------|-------------|------------|------------|-----------|
| A_52_P5068 | 240.3    | Detected   | 165.1   | Detected | 159      | Detected   | 192.6   | Detected   | Btbd7         | 0.801498127 | 0.66167291 | 1.16656572 | 0.9630527 |
| A_52_P9980 | 688      | Detected   | 676.5   | Detected | 649.9    | Detected   | 551.4   | Detected   | Dpy19l3       | 0.801453488 | 0.94462209 | 0.81507761 | 0.96068   |
| A_51_P4217 | 10947.3  | Detected   | 6490.4  | Detected | 9716.2   | Detected   | 8773.4  | Detected   | Slc12a7       | 0.801421355 | 0.88754305 | 1.35175028 | 1.497011  |
| A_51_P1864 | 28.2     | Detected   | 57.1    | Detected | 12.7     | Not Detect | 22.6    | Not Detect | Slc11a1       | 0.80141844  | 0.45035461 | 0.39579685 | 0.2224168 |
| A_55_P2087 | 14.6     | Not Detect | 32.8    | Detected | 17.7     | Not Detect | 11.7    | Not Detect | Slc26a10      | 0.801369863 | 1.21232877 | 0.35670732 | 0.5396341 |
| A_52_P4008 | 693.9    | Detected   | 493.8   | Detected | 587.5    | Detected   | 556     | Detected   | Zfp595        | 0.801268194 | 0.84666378 | 1.12596193 | 1.1897529 |
| A_66_P1403 | 721.5    | Detected   | 546.7   | Detected | 414.8    | Detected   | 578.1   | Detected   | Mbnl3         | 0.801247401 | 0.57491337 | 1.05743552 | 0.7587342 |
| A_51_P4305 | 5400.5   | Detected   | 4186.4  | Detected | 4708.1   | Detected   | 4327    | Detected   | Mtpn          | 0.801222109 | 0.87178965 | 1.03358494 | 1.1246178 |
| A_55_P1986 | 8827.3   | Detected   | 4093.2  | Detected | 4510     | Detected   | 7072.2  | Detected   | Tulp4         | 0.801173632 | 0.510915   | 1.72779244 | 1.1018274 |
| A_51_P2375 | 83334.6  | Detected   | 62855.7 | Detected | 61371.2  | Detected   | 66761.2 | Detected   | Eif1ax        | 0.801122223 | 0.73644321 | 1.06213438 | 0.9763824 |
| A_55_P1971 | 2592.4   | Detected   | 2415.3  | Detected | 2141.9   | Detected   | 2076.8  | Detected   | Golga7b       | 0.80111094  | 0.82622281 | 0.85985178 | 0.886805  |
| A_55_P2067 | 6476     | Detected   | 4592.5  | Detected | 5238.4   | Detected   | 5187.8  | Detected   | Slc10a3       | 0.801080914 | 0.80889438 | 1.12962439 | 1.1406424 |
| A_51_P1447 | 26185.2  | Detected   | 26001.4 | Detected | 22149.9  | Detected   | 20975.4 | Detected   | 2410002F23Rik | 0.801040282 | 0.84589386 | 0.80670272 | 0.8518734 |
| A_52_P3995 | 4604.8   | Detected   | 3375.8  | Detected | 3245.6   | Detected   | 3688.3  | Detected   | Ckap2l        | 0.800968555 | 0.70482974 | 1.09257065 | 0.9614314 |
| A_55_P2180 | 9353.4   | Detected   | 7876.6  | Detected | 10451.6  | Detected   | 7491.1  | Detected   | Zfand5        | 0.800895931 | 1.11741185 | 0.95105756 | 1.3269177 |
| A_52_P1789 | 26517    | Detected   | 19825.2 | Detected | 22862.9  | Detected   | 21233.2 | Detected   | Fam168b       | 0.800739148 | 0.86219784 | 1.07102072 | 1.1532242 |
| A_52_P4668 | 35042.8  | Detected   | 22251.3 | Detected | 31100.8  | Detected   | 28056   | Detected   | Hnrnpd        | 0.800620955 | 0.88750899 | 1.26087015 | 1.3977071 |
| A_55_P1967 | 185      | Detected   | 148.1   | Detected | 139      | Detected   | 148.1   | Detected   | Tmem198       | 0.800540541 | 0.75135135 | 1          | 0.938555  |
| A_55_P1982 | 37.1     | Detected   | 45.6    | Detected | 26.8     | Detected   | 29.7    | Not Detect | Spsb4         | 0.800539084 | 0.72237197 | 0.65131579 | 0.5877193 |
| A_55_P2085 | 48847.3  | Detected   | 28274.2 | Detected | 48973.7  | Detected   | 39102.1 | Detected   | Chaf1b        | 0.80049665  | 1.00258766 | 1.38296044 | 1.7320985 |
| A_66_P1286 | 543.3    | Detected   | 314.9   | Detected | 544.9    | Detected   | 434.9   | Detected   | Fut11         | 0.800478557 | 1.00294497 | 1.38107336 | 1.7303906 |
| A_55_P2020 | 13904.4  | Detected   | 12341.1 | Detected | 12344.3  | Detected   | 11128.2 | Detected   | Camk2g        | 0.800336584 | 0.88779811 | 0.90171865 | 1.0002593 |
| A_55_P2133 | 17192.9  | Detected   | 9130.9  | Detected | 10875.9  | Detected   | 13757   | Detected   | Steap2        | 0.800155878 | 0.63258089 | 1.50664228 | 1.1911093 |
| A_55_P2019 | 602.3    | Detected   | 583.2   | Detected | 177.3    | Detected   | 481.9   | Detected   | Eno2          | 0.800099618 | 0.29437158 | 0.82630316 | 0.3040123 |
| A_55_P2027 | 37770.6  | Detected   | 27201.4 | Detected | 28199.3  | Detected   | 30219.2 | Detected   | Gas2l1        | 0.800072014 | 0.74659391 | 1.11094282 | 1.0366856 |
| A_51_P1100 | 350      | Detected   | 761.9   | Detected | 3.6      | Not Detect | 280     | Detected   | Dmrta2        | 0.8         | 0.01028571 | 0.3675023  | 0.004725  |
| A_55_P2137 | 23       | Detected   | 34.1    | Detected | 14.3     | Not Detect | 18.4    | Not Detect | Mpp3          | 0.8         | 0.62173913 | 0.53958944 | 0.4193548 |
| A_51_P2081 | 1492.3   | Detected   | 1524.9  | Detected | 1689.2   | Detected   | 1193.2  | Detected   | Klhl25        | 0.799571132 | 1.13194398 | 0.78247754 | 1.1077448 |
| A_51_P1407 | 66583.6  | Detected   | 54705.7 | Detected | 53766.8  | Detected   | 53237.8 | Detected   | Cops5         | 0.799563256 | 0.80750816 | 0.97316733 | 0.9828373 |
| A_51_P3277 | 7044.5   | Detected   | 6921.6  | Detected | 7097.1   | Detected   | 5632.4  | Detected   | Pfdn2         | 0.799545745 | 1.00746682 | 0.81374249 | 1.0253554 |
| A_55_P2130 | 23716.8  | Detected   | 18421.7 | Detected | 26730.5  | Detected   | 18961.9 | Detected   | Parva         | 0.799513425 | 1.12707026 | 1.02932411 | 1.4510333 |
| A_51_P4856 | 155.1    | Detected   | 127     | Detected | 138.4    | Detected   | 124     | Detected   | 3110052M02Rik | 0.799484204 | 0.89232753 | 0.97637795 | 1.0897638 |
| A_52_P2659 | 36.9     | Detected   | 67.4    | Detected | 53.4     | Detected   | 29.5    | Not Detect | Trim36        | 0.799457995 | 1.44715447 | 0.43768546 | 0.7922849 |
| A_55_P2175 | 99.2     | Detected   | 72      | Detected | 59.6     | Detected   | 79.3    | Detected   | Ftx           | 0.799395161 | 0.60080645 | 1.10138889 | 0.8277778 |
| A_52_P2742 | 21364.5  | Detected   | 15498.9 | Detected | 18909.2  | Detected   | 17078.1 | Detected   | Maea          | 0.799368111 | 0.88507571 | 1.1018911  | 1.220035  |
| A_55_P2131 | 284.6    | Detected   | 145.1   | Detected | 163.6    | Detected   | 227.5   | Detected   | Gm2590        | 0.799367533 | 0.57484188 | 1.56788422 | 1.1274983 |
| A_55_P1952 | 123984.8 | Detected   | 92136   | Detected | 106184.9 | Detected   | 99099.5 | Detected   | Anapc5        | 0.799287493 | 0.85643482 | 1.07557849 | 1.15248   |
| A_55_P2032 | 2245.4   | Detected   | 2219.4  | Detected | 1698.4   | Detected   | 1794.7  | Detected   | Zfp932        | 0.799278525 | 0.75639084 | 0.80864198 | 0.7652519 |
| A_55_P2169 | 26743.5  | Detected   | 24609.3 | Detected | 22314.4  | Detected   | 21372.3 | Detected   | Gm10405       | 0.799158674 | 0.83438593 | 0.86846436 | 0.9067466 |
| A_51_P5080 | 443.1    | Detected   | 384.5   | Detected | 310.1    | Detected   | 354.1   | Detected   | Zfp142        | 0.799142406 | 0.69984202 | 0.92093628 | 0.806502  |

|            |         |            |         |          |         |            |         |            |               |             |            |            |           |
|------------|---------|------------|---------|----------|---------|------------|---------|------------|---------------|-------------|------------|------------|-----------|
| A_55_P1980 | 75680.6 | Detected   | 72303.6 | Detected | 73930.7 | Detected   | 60474.2 | Detected   | Pcbp2         | 0.79907136  | 0.97687783 | 0.83639266 | 1.0225037 |
| A_55_P2162 | 732     | Detected   | 422.3   | Detected | 585.5   | Detected   | 584.9   | Detected   | Pex6          | 0.799043716 | 0.79986339 | 1.38503434 | 1.3864551 |
| A_55_P2053 | 75.6    | Detected   | 49.3    | Detected | 50.4    | Detected   | 60.4    | Detected   | Gabrg3        | 0.798941799 | 0.66666667 | 1.22515213 | 1.0223124 |
| A_55_P2057 | 15147.7 | Detected   | 14300.3 | Detected | 12895.7 | Detected   | 12101.5 | Detected   | Scn8a         | 0.798900163 | 0.85133057 | 0.84624099 | 0.9017783 |
| A_51_P3429 | 2805.6  | Detected   | 2374.2  | Detected | 2531.1  | Detected   | 2241    | Detected   | Sh3bp1        | 0.798759624 | 0.90215997 | 0.94389689 | 1.0660854 |
| A_51_P4478 | 15.9    | Detected   | 26      | Detected | 9.1     | Not Detect | 12.7    | Not Detect | Sash3         | 0.798742138 | 0.57232704 | 0.48846154 | 0.35      |
| A_55_P1968 | 6831    | Detected   | 5339.8  | Detected | 5149.4  | Detected   | 5455.8  | Detected   | Tceb1         | 0.798682477 | 0.75382814 | 1.02172366 | 0.9643432 |
| A_52_P4915 | 3513    | Detected   | 2510.4  | Detected | 3051.6  | Detected   | 2805.7  | Detected   | 1700017B05Rik | 0.798662112 | 0.86865927 | 1.11763066 | 1.2155832 |
| A_55_P1960 | 4943.2  | Detected   | 3943    | Detected | 4389.1  | Detected   | 3947.8  | Detected   | Srbd1         | 0.798632465 | 0.88790662 | 1.00121735 | 1.1131372 |
| A_52_P1442 | 72.5    | Detected   | 35.7    | Detected | 49.9    | Detected   | 57.9    | Detected   | Tspyl3        | 0.79862069  | 0.68827586 | 1.62184874 | 1.3977591 |
| A_51_P4645 | 28.3    | Detected   | 21.8    | Detected | 41.9    | Detected   | 22.6    | Not Detect | Dnajc28       | 0.798586572 | 1.48056537 | 1.03669725 | 1.9220183 |
| A_51_P2640 | 10775   | Detected   | 9294.9  | Detected | 10595   | Detected   | 8604.5  | Detected   | Pigf          | 0.798561485 | 0.98329466 | 0.92572271 | 1.1398724 |
| A_55_P1966 | 29472.2 | Detected   | 29073.4 | Detected | 25026.8 | Detected   | 23534.8 | Detected   | Bpifc         | 0.798542355 | 0.84916633 | 0.80949597 | 0.8608144 |
| A_52_P2947 | 13750.3 | Detected   | 13125.8 | Detected | 13258.8 | Detected   | 10979.2 | Detected   | Ndufaf2       | 0.798469852 | 0.96425533 | 0.83645949 | 1.0101327 |
| A_55_P1958 | 10319.9 | Detected   | 10517.2 | Detected | 10803.7 | Detected   | 8239.2  | Detected   | Tcof1         | 0.798379829 | 1.0468803  | 0.78340243 | 1.0272411 |
| A_51_P4221 | 7117.2  | Detected   | 5042.1  | Detected | 3094.4  | Detected   | 5682.1  | Detected   | Fam126a       | 0.798361715 | 0.43477772 | 1.12693124 | 0.6137125 |
| A_51_P3592 | 14463.9 | Detected   | 16295.4 | Detected | 14331.4 | Detected   | 11547   | Detected   | Tmem9         | 0.7983324   | 0.99083926 | 0.70860488 | 0.8794752 |
| A_55_P2238 | 11.9    | Not Detect | 25.3    | Detected | 8.6     | Not Detect | 9.5     | Not Detect | 5031415H12Rik | 0.798319328 | 0.72268908 | 0.37549407 | 0.3399209 |
| A_51_P3229 | 7625.5  | Detected   | 7031.5  | Detected | 8236.6  | Detected   | 6087.3  | Detected   | Ptrhd1        | 0.79828208  | 1.08013901 | 0.86571855 | 1.1713859 |
| A_51_P2491 | 3418.5  | Detected   | 1776.3  | Detected | 2008.3  | Detected   | 2728.6  | Detected   | Pkd1          | 0.798186339 | 0.58747989 | 1.5361144  | 1.1306086 |
| A_66_P1023 | 31.7    | Detected   | 31.5    | Detected | 35.8    | Detected   | 25.3    | Not Detect | Calb1         | 0.798107256 | 1.12933754 | 0.8031746  | 1.1365079 |
| A_55_P2025 | 7194.6  | Detected   | 5465.2  | Detected | 6452.5  | Detected   | 5741.7  | Detected   | C330007P06Rik | 0.798056876 | 0.8968532  | 1.05059284 | 1.1806521 |
| A_52_P3792 | 118.8   | Detected   | 67.4    | Detected | 114.4   | Detected   | 94.8    | Detected   | Zfp738        | 0.797979798 | 0.96296296 | 1.40652819 | 1.6973294 |
| A_51_P1928 | 26040.5 | Detected   | 19838.9 | Detected | 16820.5 | Detected   | 20779.3 | Detected   | Grn           | 0.797960869 | 0.64593614 | 1.04740182 | 0.8478545 |
| A_55_P2284 | 256.7   | Detected   | 176.2   | Detected | 228.7   | Detected   | 204.8   | Detected   | Zfp395        | 0.797818465 | 0.89092326 | 1.16231555 | 1.2979569 |
| A_52_P3793 | 20990.1 | Detected   | 19583   | Detected | 16006.3 | Detected   | 16745.8 | Detected   | Rtn4          | 0.797795151 | 0.76256426 | 0.85511924 | 0.8173569 |
| A_55_P2008 | 3365    | Detected   | 3108.7  | Detected | 3197    | Detected   | 2684.5  | Detected   | Nlk           | 0.797771174 | 0.95007429 | 0.86354425 | 1.0284042 |
| A_52_P2758 | 98.4    | Detected   | 91.8    | Detected | 121.2   | Detected   | 78.5    | Detected   | Pign          | 0.797764228 | 1.23170732 | 0.85511983 | 1.3202614 |
| A_55_P2088 | 6893.3  | Detected   | 6392.7  | Detected | 5728.2  | Detected   | 5499    | Detected   | Hpca          | 0.79773113  | 0.83098081 | 0.86019992 | 0.8960533 |
| A_52_P2796 | 698     | Detected   | 543.9   | Detected | 386.5   | Detected   | 556.8   | Detected   | Lrp8          | 0.797707736 | 0.55372493 | 1.0237176  | 0.7106086 |
| A_55_P1956 | 8181    | Detected   | 7721.4  | Detected | 6875.5  | Detected   | 6525.8  | Detected   | Dmtn          | 0.797677546 | 0.84042293 | 0.84515761 | 0.8904473 |
| A_55_P2054 | 68720.6 | Detected   | 60905.6 | Detected | 56511.4 | Detected   | 54815.6 | Detected   | Ephb3         | 0.797658926 | 0.82233566 | 0.90000919 | 0.9278523 |
| A_55_P2010 | 12073   | Detected   | 8523.3  | Detected | 11997.6 | Detected   | 9629.1  | Detected   | Fam73b        | 0.797573097 | 0.99375466 | 1.12973848 | 1.4076238 |
| A_52_P6283 | 744.6   | Detected   | 750.2   | Detected | 543.1   | Detected   | 593.7   | Detected   | Foxred2       | 0.797340854 | 0.7293849  | 0.79138896 | 0.7239403 |
| A_55_P2029 | 118.9   | Detected   | 129.3   | Detected | 54.3    | Detected   | 94.8    | Detected   | Cetn4         | 0.797308663 | 0.45668629 | 0.73317865 | 0.4199536 |
| A_55_P2084 | 66.1    | Detected   | 62.8    | Detected | 44.5    | Detected   | 52.7    | Not Detect | Trim71        | 0.797276853 | 0.67322239 | 0.83917197 | 0.7085987 |
| A_55_P2020 | 50.3    | Detected   | 34.1    | Detected | 36.7    | Detected   | 40.1    | Not Detect | LOC101056474  | 0.7972167   | 0.72962227 | 1.17595308 | 1.0762463 |
| A_55_P2124 | 4597.8  | Detected   | 6287.1  | Detected | 5519.9  | Detected   | 3665.3  | Detected   | Nipsnap1      | 0.797185611 | 1.20055244 | 0.58298739 | 0.8779724 |
| A_55_P1959 | 5963.2  | Detected   | 5173.9  | Detected | 5099.2  | Detected   | 4753.7  | Detected   | Pfdn4         | 0.797172659 | 0.85511135 | 0.91878467 | 0.9855621 |
| A_55_P1987 | 21.2    | Detected   | 22.8    | Detected | 61.5    | Detected   | 16.9    | Not Detect | Gm5622        | 0.797169811 | 2.9009434  | 0.74122807 | 2.6973684 |



|            |         |          |          |            |          |            |          |            |               |             |            |            |           |
|------------|---------|----------|----------|------------|----------|------------|----------|------------|---------------|-------------|------------|------------|-----------|
| A_55_P2037 | 15819.2 | Detected | 17656.2  | Detected   | 14170.3  | Detected   | 12610.5  | Detected   | Ran           | 0.797164206 | 0.8957659  | 0.71422503 | 0.8025679 |
| A_66_P1038 | 218.4   | Detected | 165.6    | Detected   | 138.1    | Detected   | 174.1    | Detected   | Elk1          | 0.797161172 | 0.63232601 | 1.0513285  | 0.8339372 |
| A_51_P4460 | 10966.4 | Detected | 8169.8   | Detected   | 7419.8   | Detected   | 8741.9   | Detected   | Phf13         | 0.797153122 | 0.67659396 | 1.07002619 | 0.9081985 |
| A_55_P2174 | 295058  | Detected | 269771.1 | Detected   | 284152.6 | Detected   | 235205.3 | Detected   | Rpl7          | 0.797149374 | 0.96303981 | 0.87186989 | 1.05331   |
| A_51_P1132 | 10085.1 | Detected | 6492.8   | Detected   | 9413.1   | Detected   | 8039.3   | Detected   | Hps6          | 0.797146285 | 0.93336705 | 1.23818691 | 1.4497751 |
| A_65_P1843 | 4791.6  | Detected | 4356.1   | Detected   | 5175.1   | Detected   | 3819.6   | Detected   | Ankrd28       | 0.797145004 | 1.0800359  | 0.87683937 | 1.1880122 |
| A_51_P2526 | 27.6    | Detected | 24.6     | Detected   | 28.9     | Detected   | 22       | Not Detect | Olfr338       | 0.797101449 | 1.04710145 | 0.89430894 | 1.1747967 |
| A_55_P2065 | 705.5   | Detected | 441.8    | Detected   | 695.2    | Detected   | 562.3    | Detected   | Gm14308       | 0.797023388 | 0.98540043 | 1.27274785 | 1.5735627 |
| A_51_P3005 | 947.2   | Detected | 753.5    | Detected   | 593.9    | Detected   | 754.9    | Detected   | Slc30a1       | 0.796980574 | 0.62700591 | 1.001858   | 0.7881885 |
| A_55_P2144 | 791.9   | Detected | 639.4    | Detected   | 878.4    | Detected   | 631.1    | Detected   | Zfp790        | 0.796944059 | 1.10923096 | 0.98701908 | 1.3737879 |
| A_55_P1955 | 868.7   | Detected | 849.1    | Detected   | 940.8    | Detected   | 692.3    | Detected   | LOC101056084  | 0.796937953 | 1.08299758 | 0.81533388 | 1.1079967 |
| A_52_P2140 | 44.3    | Detected | 58       | Detected   | 59.2     | Detected   | 35.3     | Not Detect | Zbtb46        | 0.796839729 | 1.33634312 | 0.60862069 | 1.0206897 |
| A_55_P1965 | 42.8    | Detected | 41.1     | Detected   | 14.9     | Not Detect | 34.1     | Not Detect | 9430091E24Rik | 0.796728972 | 0.34813084 | 0.8296837  | 0.3625304 |
| A_55_P1957 | 5697.6  | Detected | 3502.4   | Detected   | 5494     | Detected   | 4539.3   | Detected   | Obfc1         | 0.796703875 | 0.96426566 | 1.29605413 | 1.5686386 |
| A_55_P2158 | 9508    | Detected | 6883.9   | Detected   | 7961.5   | Detected   | 7574.9   | Detected   | Knstrn        | 0.796687    | 0.8373475  | 1.10037915 | 1.1565392 |
| A_66_P1020 | 26898.7 | Detected | 18554.5  | Detected   | 23954.2  | Detected   | 21427.3  | Detected   | Pkmyt1        | 0.7965924   | 0.89053374 | 1.15483036 | 1.2910184 |
| A_51_P2065 | 945.3   | Detected | 637.8    | Detected   | 497.4    | Detected   | 753      | Detected   | Runx1         | 0.796572517 | 0.52618216 | 1.18062088 | 0.7798683 |
| A_51_P3142 | 6435.7  | Detected | 6035     | Detected   | 6172.6   | Detected   | 5126.4   | Detected   | Parp1         | 0.796556707 | 0.95911867 | 0.8494449  | 1.0228003 |
| A_55_P2376 | 16.7    | Detected | 10.6     | Not Detect | 5.8      | Not Detect | 13.3     | Not Detect | 4930558K02Rik | 0.796407186 | 0.34730539 | 1.25471698 | 0.5471698 |
| A_55_P2092 | 16.2    | Detected | 12.1     | Not Detect | 10.6     | Not Detect | 12.9     | Not Detect | Sec61a2       | 0.796296296 | 0.65432099 | 1.0661157  | 0.8760331 |
| A_55_P2371 | 32.4    | Detected | 34.2     | Detected   | 30.6     | Detected   | 25.8     | Not Detect | Kcnp3         | 0.796296296 | 0.94444444 | 0.75438596 | 0.8947368 |
| A_55_P2040 | 6321.8  | Detected | 4349.1   | Detected   | 5890.3   | Detected   | 5033.5   | Detected   | Cdv3          | 0.796213104 | 0.93174412 | 1.15736589 | 1.3543722 |
| A_52_P1001 | 1179.1  | Detected | 706.6    | Detected   | 1094.7   | Detected   | 938.8    | Detected   | Abhd10        | 0.796200492 | 0.92841998 | 1.32861591 | 1.5492499 |
| A_66_P1285 | 7830.4  | Detected | 5754.7   | Detected   | 5844.7   | Detected   | 6234.3   | Detected   | Lims1         | 0.796166224 | 0.74641142 | 1.08334057 | 1.0156394 |
| A_55_P2119 | 54276.4 | Detected | 44837.3  | Detected   | 60115.9  | Detected   | 43211.4  | Detected   | Ndufv2        | 0.796136074 | 1.1075882  | 0.96373778 | 1.3407565 |
| A_52_P3730 | 25.5    | Detected | 21.8     | Detected   | 18.2     | Detected   | 20.3     | Not Detect | Adam26a       | 0.796078431 | 0.71372549 | 0.93119266 | 0.8348624 |
| A_55_P1953 | 15.2    | Detected | 23.7     | Detected   | 3.2      | Not Detect | 12.1     | Not Detect | Osbpl6        | 0.796052632 | 0.21052632 | 0.51054852 | 0.1350211 |
| A_55_P1978 | 3220.9  | Detected | 2288.3   | Detected   | 2424.7   | Detected   | 2563.9   | Detected   | Aven          | 0.796019746 | 0.75280201 | 1.12043875 | 1.0596076 |
| A_55_P2180 | 3563.9  | Detected | 2961.8   | Detected   | 3041.4   | Detected   | 2836.8   | Detected   | Psmd10        | 0.79598193  | 0.85339095 | 0.95779593 | 1.0268755 |
| A_55_P2061 | 83489.4 | Detected | 60624    | Detected   | 81992.8  | Detected   | 66448.6  | Detected   | Set           | 0.795892652 | 0.98207437 | 1.09607746 | 1.3524809 |
| A_51_P4876 | 58.3    | Detected | 68.6     | Detected   | 19.7     | Detected   | 46.4     | Not Detect | H2afy3        | 0.795883362 | 0.33790738 | 0.67638484 | 0.287172  |
| A_51_P1916 | 3948.9  | Detected | 3016.2   | Detected   | 3083.5   | Detected   | 3142.7   | Detected   | Ndc80         | 0.79584188  | 0.78085036 | 1.04194019 | 1.0223128 |
| A_55_P2138 | 12330.1 | Detected | 9379.6   | Detected   | 11793.3  | Detected   | 9812.8   | Detected   | Ube2d2a       | 0.795841072 | 0.95646426 | 1.04618534 | 1.2573351 |
| A_55_P2330 | 872.6   | Detected | 694.1    | Detected   | 694.8    | Detected   | 694.4    | Detected   | Zfp81         | 0.795782718 | 0.79624112 | 1.00043221 | 1.0010085 |
| A_51_P1580 | 802     | Detected | 607.9    | Detected   | 746.1    | Detected   | 638.2    | Detected   | Dalrd3        | 0.795760599 | 0.93029925 | 1.04984372 | 1.22734   |
| A_55_P2030 | 52295.3 | Detected | 50672.9  | Detected   | 48046.9  | Detected   | 41613.9  | Detected   | Actr10        | 0.795748375 | 0.91876134 | 0.82122594 | 0.9481774 |
| A_52_P6395 | 6380.4  | Detected | 5090.2   | Detected   | 6034.7   | Detected   | 5076.5   | Detected   | Tinf2         | 0.795639772 | 0.94581844 | 0.99730855 | 1.1855526 |
| A_55_P2109 | 9590.1  | Detected | 8250     | Detected   | 8903.6   | Detected   | 7629.1   | Detected   | Rnps1         | 0.795518295 | 0.92841576 | 0.92473939 | 1.0792242 |
| A_55_P1967 | 66      | Detected | 63.9     | Detected   | 32.2     | Detected   | 52.5     | Detected   | Fgfr1         | 0.795454545 | 0.48787879 | 0.82159624 | 0.5039124 |
| A_55_P2145 | 7247.7  | Detected | 7790.7   | Detected   | 5407.4   | Detected   | 5764.1   | Detected   | Wdr45         | 0.795300578 | 0.74608496 | 0.73986933 | 0.694084  |

|            |         |            |         |            |         |            |         |            |               |             |             |            |            |           |
|------------|---------|------------|---------|------------|---------|------------|---------|------------|---------------|-------------|-------------|------------|------------|-----------|
| A_51_P3898 | 3411.3  | Detected   | 1944.9  | Detected   | 3091.1  | Detected   | 2713    | Detected   | Slc35f5       | 0.79529798  | 0.90613549  | 1.39493033 | 1.5893362  |           |
| A_55_P1962 | 60252.3 | Detected   | 38338.5 | Detected   | 47358.3 | Detected   | 47907   | Detected   | Nckap1        | 0.795106577 | 0.78599987  | 1.2495794  | 1.2352674  |           |
| A_55_P2071 | 3103.5  | Detected   | 2620.5  | Detected   | 2151.7  | Detected   | 2467.5  | Detected   | Suv39h1       | 0.795070082 | 0.693314    | 0.9416142  | 0.8211028  |           |
| A_55_P1979 | 40      | Detected   | 32.4    | Detected   | 28.1    | Detected   | 31.8    | Not Detect | Klk11         | 0.795       | 0.7025      | 0.98148148 | 0.867284   |           |
| A_55_P2155 | 2351.9  | Detected   | 2696.3  | Detected   | 1982.7  | Detected   | 1869.7  | Detected   | Eps8          | 0.794974276 | 0.84302054  | 0.69343174 | 0.735341   |           |
| A_55_P2068 | 4736.7  | Detected   | 3304    | Detected   | 4181.6  | Detected   | 3765.1  | Detected   | 9030624G23Rik | 0.794878291 | 0.88280871  | 1.13955811 | 1.2656174  |           |
| A_55_P1985 | 7159.9  | Detected   | 6694.5  | Detected   | 6169    | Detected   | 5691.1  | Detected   | Mef2a         | 0.79485747  | 0.86160421  | 0.85011577 | 0.9215027  |           |
| A_55_P2082 | 5518.4  | Detected   | 4056.8  | Detected   | 5182.1  | Detected   | 4386    | Detected   | Fam160b1      | 0.794795593 | 0.93905842  | 1.0811477  | 1.2773861  |           |
| A_66_P1269 | 11.2    | Not Detect | 17.4    | Detected   | 3.2     | Not Detect | 8.9     | Not Detect | D730003K21Rik | 0.794642857 | 0.28571429  | 0.51149425 | 0.183908   |           |
| A_55_P2141 | 13094.9 | Detected   | 10057.6 | Detected   | 12523.7 | Detected   | 10404.4 | Detected   | Erlin1        | 0.794538332 | 0.95637996  | 1.03448139 | 1.2451977  |           |
| A_51_P1731 | 31576.9 | Detected   | 46022.5 | Detected   | 26959.4 | Detected   | 25083.5 | Detected   | Pttg1ip       | 0.794362334 | 0.85376969  | 0.54502689 | 0.5857874  |           |
| A_55_P1998 | 10339.3 | Detected   | 10132.8 | Detected   | 11186   | Detected   | 8213    | Detected   | LOC101056029  | 0.79434778  | 1.08189142  | 0.81053608 | 1.1039397  |           |
| A_55_P2171 | 20126.3 | Detected   | 14300.4 | Detected   | 20261.6 | Detected   | 15985.8 | Detected   | Ppp1r7        | 0.794274159 | 1.00672255  | 1.11785684 | 1.4168555  |           |
| A_51_P4618 | 295.5   | Detected   | 243.4   | Detected   | 261.5   | Detected   | 234.7   | Detected   | Tbp           | 0.794247039 | 0.88494078  | 0.96425637 | 1.0743632  |           |
| A_55_P1990 | 55957.3 | Detected   | 42879.2 | Detected   | 47124   | Detected   | 44443.8 | Detected   | Ptp4a1        | 0.794244897 | 0.84214213  | 1.03648855 | 1.0989944  |           |
| A_55_P1953 | 21171.9 | Detected   | 22057.3 | Detected   | 21511.4 | Detected   | 16813.4 | Detected   | Hspe1         | 0.794137512 | 1.01603541  | 0.76226011 | 0.9752508  |           |
| A_51_P1263 | 1531.5  | Detected   | 1350.9  | Detected   | 1033    | Detected   | 1216.1  | Detected   | Rbmx2         | 0.794058113 | 0.67450212  | 0.90021467 | 0.7646754  |           |
| A_55_P2006 | 3187.7  | Detected   | 2416.6  | Detected   | 2557.5  | Detected   | 2531.2  | Detected   | Rbbp6         | 0.794052138 | 0.8023026   | 1.047422   | 1.0583051  |           |
| A_55_P2068 | 56.8    | Detected   | 47.1    | Detected   | 28.9    | Detected   | 45.1    | Detected   | Ago3          | 0.794014085 | 0.50880282  | 0.95753715 | 0.6135881  |           |
| A_51_P1958 | 66.5    | Detected   | 70.4    | Detected   | 67.9    | Detected   | 52.8    | Not Detect | Notch4        | 0.793984962 | 1.02105263  | 0.75       | 0.9644886  |           |
| A_55_P2050 | 36103.3 | Detected   | 30391.4 | Detected   | 31269.3 | Detected   | 28664.2 | Detected   | Nup35         | 0.793949584 | 0.86610642  | 0.94316813 | 1.0288865  |           |
| A_55_P1970 | 789.2   | Detected   | 544     | Detected   | 862.9   | Detected   | 626.4   | Detected   | Kdm3b         | 0.793715155 | 1.09338571  | 1.15147059 | 1.5862132  |           |
| A_51_P4392 | 613.6   | Detected   | 557.8   | Detected   | 476.3   | Detected   | 487     | Detected   | Relt          | 0.793676662 | 0.77623859  | 0.87307279 | 0.8538903  |           |
| A_52_P6135 | 600.4   | Detected   | 201.4   | Detected   | 114.8   | Detected   | 476.5   | Detected   | Vav3          | 0.793637575 | 0.19120586  | 2.36593843 | 0.5700099  |           |
| A_51_P1588 | 726.8   | Detected   | 309.1   | Detected   | 478.3   | Detected   | 576.8   | Detected   | Marveld1      | 0.79361585  | 0.65809026  | 1.86606276 | 1.5473957  |           |
| A_55_P2039 | 18253.3 | Detected   | 11835.8 | Detected   | 11256.1 | Detected   | 14484.9 | Detected   | Arhgap23      | 0.79354966  | 0.6166611   | 1.22382095 | 0.9510215  |           |
| A_55_P2062 | 7597.6  | Detected   | 5771.2  | Detected   | 7576.5  | Detected   | 6027.9  | Detected   |               | 7-Mar       | 0.793395283 | 0.99722281 | 1.04447948 | 1.3128119 |
| A_55_P1997 | 9833.2  | Detected   | 13285   | Detected   | 6994.8  | Detected   | 7801.6  | Detected   | Pla2g4a       | 0.793393809 | 0.71134524  | 0.58724878 | 0.5265186  |           |
| A_55_P2049 | 12.1    | Not Detect | 15.3    | Not Detect | 19.9    | Detected   | 9.6     | Not Detect | Ttc16         | 0.79338843  | 1.6446281   | 0.62745098 | 1.3006536  |           |
| A_55_P2099 | 39590.3 | Detected   | 38150.9 | Detected   | 33073.4 | Detected   | 31407.9 | Detected   | Cers5         | 0.793323112 | 0.8353915   | 0.8232545  | 0.8669101  |           |
| A_66_P1106 | 426.7   | Detected   | 413.2   | Detected   | 417.1   | Detected   | 338.5   | Detected   | Taf1a         | 0.793297399 | 0.97750176  | 0.81921588 | 1.0094385  |           |
| A_51_P3232 | 35264.7 | Detected   | 26282.9 | Detected   | 32122.5 | Detected   | 27974.1 | Detected   | Trim28        | 0.793260683 | 0.91089673  | 1.06434602 | 1.2221825  |           |
| A_55_P2017 | 264.1   | Detected   | 227.1   | Detected   | 193.2   | Detected   | 209.5   | Detected   | Ehbp1         | 0.793260129 | 0.73154108  | 0.9225011  | 0.8507266  |           |
| A_52_P3542 | 239.8   | Detected   | 203.3   | Detected   | 281.8   | Detected   | 190.2   | Detected   | Eri2          | 0.793160967 | 1.17514595  | 0.93556321 | 1.3861289  |           |
| A_51_P2104 | 41953   | Detected   | 33620.9 | Detected   | 39893   | Detected   | 33274.4 | Detected   | Mrpl18        | 0.793135175 | 0.95089743  | 0.98969391 | 1.1865536  |           |
| A_55_P2090 | 54342.9 | Detected   | 39204.8 | Detected   | 52832.1 | Detected   | 43099.1 | Detected   | BC085271      | 0.793095326 | 0.97219876  | 1.09933222 | 1.3475926  |           |
| A_55_P2026 | 298.2   | Detected   | 33.9    | Detected   | 1106.7  | Detected   | 236.5   | Detected   | Pilrb1        | 0.793091885 | 3.71126761  | 6.97640118 | 32.646018  |           |
| A_51_P1140 | 6292.5  | Detected   | 5129.4  | Detected   | 6204.8  | Detected   | 4989.9  | Detected   | Bcl7c         | 0.792991657 | 0.98606277  | 0.97280384 | 1.2096542  |           |
| A_51_P4178 | 1297.2  | Detected   | 737.1   | Detected   | 1020.7  | Detected   | 1028.4  | Detected   | Hdac4         | 0.792784459 | 0.7868486   | 1.3951974  | 1.3847511  |           |
| A_52_P2235 | 3096.8  | Detected   | 3011.3  | Detected   | 3173.8  | Detected   | 2454.9  | Detected   | Mlec          | 0.792721519 | 1.02486438  | 0.8152293  | 1.0539634  |           |

|            |         |            |         |          |         |          |         |            |               |             |            |            |           |
|------------|---------|------------|---------|----------|---------|----------|---------|------------|---------------|-------------|------------|------------|-----------|
| A_55_P2016 | 1860.1  | Detected   | 1670.7  | Detected | 1198.4  | Detected | 1474.5  | Detected   | Rbm12b2       | 0.792699317 | 0.64426644 | 0.88256419 | 0.7173041 |
| A_51_P3514 | 1172.7  | Detected   | 813.9   | Detected | 1067.6  | Detected | 929.5   | Detected   | Phospho2      | 0.792615332 | 0.91037776 | 1.14203219 | 1.3117091 |
| A_52_P5022 | 3287.6  | Detected   | 2227.9  | Detected | 2738.6  | Detected | 2605.5  | Detected   | Epc2          | 0.792523421 | 0.83300888 | 1.16948696 | 1.2292293 |
| A_65_P0645 | 35046.3 | Detected   | 29167   | Detected | 30480.2 | Detected | 27774.8 | Detected   | Nup35         | 0.792517327 | 0.86971235 | 0.95226797 | 1.0450235 |
| A_52_P3748 | 108.9   | Detected   | 85.1    | Detected | 107.9   | Detected | 86.3    | Detected   | Atp6v1g2      | 0.792470156 | 0.99081726 | 1.01410106 | 1.2679201 |
| A_51_P4177 | 102.6   | Detected   | 45.5    | Detected | 76.7    | Detected | 81.3    | Detected   | Prop1         | 0.792397661 | 0.74756335 | 1.78681319 | 1.6857143 |
| A_55_P2032 | 13      | Not Detect | 28.7    | Detected | 31.9    | Detected | 10.3    | Not Detect | Slc4a5        | 0.792307692 | 2.45384615 | 0.35888502 | 1.1114983 |
| A_55_P2180 | 41.4    | Detected   | 30.1    | Detected | 33.6    | Detected | 32.8    | Not Detect | Tbc1d21       | 0.792270531 | 0.8115942  | 1.089701   | 1.1162791 |
| A_52_P2362 | 30.8    | Detected   | 39.6    | Detected | 28.9    | Detected | 24.4    | Not Detect | Gast          | 0.792207792 | 0.93831169 | 0.61616162 | 0.729798  |
| A_55_P1985 | 5728    | Detected   | 5263.2  | Detected | 5728.1  | Detected | 4537.7  | Detected   | Psmd9         | 0.792196229 | 1.00001746 | 0.8621561  | 1.0883303 |
| A_55_P1973 | 42290.7 | Detected   | 39828.1 | Detected | 36209.3 | Detected | 33501.9 | Detected   | I730030J21Rik | 0.79218126  | 0.85620006 | 0.8411624  | 0.9091395 |
| A_55_P2127 | 48117.9 | Detected   | 42038   | Detected | 39739.6 | Detected | 38115.1 | Detected   | Racgap1       | 0.792118941 | 0.82587977 | 0.90668205 | 0.9453257 |
| A_55_P2286 | 445.4   | Detected   | 409.6   | Detected | 389.7   | Detected | 352.8   | Detected   | 4933405E24Rik | 0.792096991 | 0.87494387 | 0.86132813 | 0.951416  |
| A_55_P2115 | 52.9    | Detected   | 41.4    | Detected | 30.5    | Detected | 41.9    | Not Detect | Slc26a1       | 0.792060491 | 0.57655955 | 1.01207729 | 0.736715  |
| A_51_P1018 | 884.1   | Detected   | 522     | Detected | 699.2   | Detected | 700.2   | Detected   | Dlg1          | 0.791991856 | 0.79086076 | 1.34137931 | 1.3394636 |
| A_52_P3058 | 4345.5  | Detected   | 4340.8  | Detected | 3669.6  | Detected | 3441.4  | Detected   | 2410002F23Rik | 0.791945691 | 0.84445979 | 0.79280317 | 0.8453741 |
| A_55_P2101 | 299.9   | Detected   | 201.5   | Detected | 194.7   | Detected | 237.5   | Detected   | Zhx3          | 0.791930644 | 0.64921641 | 1.17866005 | 0.9662531 |
| A_51_P1528 | 8054.6  | Detected   | 8309.9  | Detected | 6866.9  | Detected | 6378.5  | Detected   | Golt1b        | 0.79190773  | 0.85254389 | 0.76757843 | 0.8263517 |
| A_55_P2055 | 66.3    | Detected   | 51.7    | Detected | 59.2    | Detected | 52.5    | Detected   | Park2         | 0.791855204 | 0.89291101 | 1.01547389 | 1.1450677 |
| A_55_P1983 | 29.3    | Detected   | 19.9    | Detected | 22.2    | Detected | 23.2    | Not Detect | Rcbtb1        | 0.791808874 | 0.75767918 | 1.16582915 | 1.1155779 |
| A_55_P2017 | 2130.2  | Detected   | 1531.6  | Detected | 2389.1  | Detected | 1686.6  | Detected   | BC068157      | 0.791756643 | 1.12153788 | 1.10120136 | 1.559872  |
| A_55_P2042 | 14929.4 | Detected   | 9899.1  | Detected | 13808.2 | Detected | 11820.4 | Detected   | Rfwd2         | 0.791753185 | 0.92489986 | 1.19408835 | 1.3948945 |
| A_52_P3023 | 1096.5  | Detected   | 932.8   | Detected | 1000.9  | Detected | 868     | Detected   | Lnpep         | 0.791609667 | 0.9128135  | 0.93053173 | 1.073006  |
| A_55_P1972 | 45.1    | Detected   | 52.6    | Detected | 33.1    | Detected | 35.7    | Not Detect | Gm11544       | 0.791574279 | 0.73392461 | 0.67870722 | 0.6292776 |
| A_55_P2184 | 42.7    | Detected   | 22.2    | Detected | 18.6    | Detected | 33.8    | Not Detect | Ago1          | 0.791569087 | 0.43559719 | 1.52252252 | 0.8378378 |
| A_52_P4258 | 3870.7  | Detected   | 3022.1  | Detected | 3940    | Detected | 3063.9  | Detected   | Iqsec1        | 0.79156225  | 1.01790374 | 1.01383144 | 1.3037292 |
| A_51_P4556 | 15477.5 | Detected   | 11131.1 | Detected | 13392   | Detected | 12251.2 | Detected   | Psmd5         | 0.791549023 | 0.86525602 | 1.10062797 | 1.2031156 |
| A_55_P1988 | 21398.2 | Detected   | 16213.5 | Detected | 19177.8 | Detected | 16937.6 | Detected   | Naa20         | 0.791543214 | 0.89623426 | 1.04466031 | 1.1828291 |
| A_51_P1598 | 9762.5  | Detected   | 6489.3  | Detected | 9124.1  | Detected | 7727    | Detected   | Dnajc1        | 0.791498079 | 0.93460691 | 1.19072935 | 1.4060222 |
| A_55_P2049 | 93017.6 | Detected   | 77272.9 | Detected | 77212.2 | Detected | 73621.6 | Detected   | Erp29         | 0.791480322 | 0.83008162 | 0.95274799 | 0.9992145 |
| A_55_P2467 | 264.2   | Detected   | 216.3   | Detected | 194.4   | Detected | 209.1   | Detected   | Zyg11b        | 0.791445874 | 0.73580621 | 0.9667129  | 0.8987517 |
| A_55_P2089 | 918.2   | Detected   | 783     | Detected | 789.2   | Detected | 726.7   | Detected   | Pole          | 0.791439773 | 0.85950773 | 0.92809706 | 1.0079183 |
| A_55_P2169 | 16310.3 | Detected   | 20786.5 | Detected | 3863.7  | Detected | 12908.5 | Detected   | Ccdc80        | 0.791432408 | 0.23688712 | 0.62100402 | 0.1858754 |
| A_55_P2053 | 27968   | Detected   | 17939.6 | Detected | 25446.7 | Detected | 22133.7 | Detected   | St6galnac6    | 0.791393736 | 0.90985054 | 1.23379005 | 1.4184653 |
| A_52_P4708 | 483.6   | Detected   | 380.8   | Detected | 412.4   | Detected | 382.7   | Detected   | Mipol1        | 0.791356493 | 0.85277089 | 1.0049895  | 1.0829832 |
| A_51_P3249 | 51206.1 | Detected   | 52364.5 | Detected | 49343.5 | Detected | 40521.4 | Detected   | Mcm3          | 0.791339313 | 0.96362543 | 0.77383342 | 0.9423082 |
| A_51_P1331 | 33294.6 | Detected   | 27625.1 | Detected | 34743.2 | Detected | 26344.5 | Detected   | Kif20a        | 0.791254438 | 1.04350856 | 0.95364361 | 1.2576678 |
| A_55_P1975 | 527.4   | Detected   | 416.9   | Detected | 415.6   | Detected | 417.3   | Detected   | Tcf3          | 0.791240046 | 0.78801669 | 1.00095946 | 0.9968817 |
| A_55_P2162 | 1351.3  | Detected   | 830.1   | Detected | 1006.1  | Detected | 1069.1  | Detected   | Cacfd1        | 0.791164064 | 0.74454229 | 1.28791712 | 1.2120226 |
| A_52_P4349 | 20479.4 | Detected   | 15836.6 | Detected | 13445.4 | Detected | 16202.5 | Detected   | Ubqln1        | 0.791160874 | 0.65653291 | 1.02310471 | 0.849008  |

|            |                  |                  |                  |                  |               |             |            |            |           |
|------------|------------------|------------------|------------------|------------------|---------------|-------------|------------|------------|-----------|
| A_51_P4928 | 219.3 Detected   | 149.6 Detected   | 174.9 Detected   | 173.5 Detected   | Foxp4         | 0.791153671 | 0.79753762 | 1.15975936 | 1.1691176 |
| A_51_P4005 | 10857.9 Detected | 8090.5 Detected  | 9366.2 Detected  | 8590.1 Detected  | Api5          | 0.79113825  | 0.86261616 | 1.06175144 | 1.1576788 |
| A_55_P1989 | 259.9 Detected   | 158.1 Detected   | 277 Detected     | 205.6 Detected   | Bag6          | 0.79107349  | 1.06579454 | 1.30044276 | 1.7520557 |
| A_55_P2303 | 26.8 Detected    | 26.3 Detected    | 31.6 Detected    | 21.2 Not Detect  | 5033421B08Rik | 0.791044776 | 1.17910448 | 0.80608365 | 1.2015209 |
| A_51_P5077 | 86.6 Detected    | 62.3 Detected    | 58.6 Detected    | 68.5 Detected    | Tubgcp6       | 0.790993072 | 0.67667436 | 1.09951846 | 0.94061   |
| A_55_P2000 | 101.9 Detected   | 85.6 Detected    | 79.7 Detected    | 80.6 Detected    | Cln6          | 0.790971541 | 0.78213935 | 0.94158879 | 0.9310748 |
| A_66_P1360 | 721.9 Detected   | 750.2 Detected   | 650.3 Detected   | 571 Detected     | Trim13        | 0.790968278 | 0.90081729 | 0.76113037 | 0.8668355 |
| A_55_P1993 | 1193.7 Detected  | 785 Detected     | 1172.9 Detected  | 944.1 Detected   | Slx4ip        | 0.790902237 | 0.98257519 | 1.20267516 | 1.4941401 |
| A_66_P1397 | 3410.7 Detected  | 1371.9 Detected  | 944 Detected     | 2697.5 Detected  | Ppap2b        | 0.790893365 | 0.27677603 | 1.96625118 | 0.6880968 |
| A_55_P1968 | 1546 Detected    | 1081 Detected    | 1287.3 Detected  | 1222.6 Detected  | Rasa1         | 0.790815006 | 0.83266494 | 1.13098982 | 1.1908418 |
| A_51_P1572 | 1286.2 Detected  | 4551.1 Detected  | 799.7 Detected   | 1017.1 Detected  | Sdc2          | 0.790779039 | 0.621754   | 0.22348443 | 0.1757158 |
| A_55_P2201 | 60.2 Detected    | 63.1 Detected    | 53.8 Detected    | 47.6 Not Detect  | Slc30a7       | 0.790697674 | 0.89368771 | 0.75435816 | 0.8526149 |
| A_55_P2083 | 13592.6 Detected | 11021.8 Detected | 11713.4 Detected | 10747.4 Detected | Zfp664        | 0.790680223 | 0.8617483  | 0.97510389 | 1.0627484 |
| A_55_P2186 | 131.3 Detected   | 67.4 Detected    | 26.8 Detected    | 103.8 Detected   | Anks6         | 0.790555979 | 0.20411272 | 1.54005935 | 0.3976261 |
| A_55_P2002 | 52581.3 Detected | 47170.8 Detected | 35685.7 Detected | 41567.6 Detected | Pgs1          | 0.790539602 | 0.67867664 | 0.88121465 | 0.756521  |
| A_55_P1973 | 1384.9 Detected  | 1446.9 Detected  | 1036.1 Detected  | 1094.5 Detected  | Bbs12         | 0.79030977  | 0.74814066 | 0.75644481 | 0.7160827 |
| A_52_P5466 | 4065.8 Detected  | 3332 Detected    | 3220.1 Detected  | 3213.1 Detected  | Zeb1          | 0.790274977 | 0.79199666 | 0.96431573 | 0.9664166 |
| A_52_P6451 | 574.4 Detected   | 375.5 Detected   | 350.3 Detected   | 453.9 Detected   | Herc6         | 0.790215877 | 0.60985376 | 1.20878828 | 0.9328895 |
| A_55_P1965 | 855.1 Detected   | 791 Detected     | 844 Detected     | 675.7 Detected   | Cdc5l         | 0.790199977 | 0.98701906 | 0.85423515 | 1.0670038 |
| A_55_P2048 | 3769.1 Detected  | 2751.9 Detected  | 3539 Detected    | 2977.6 Detected  | Apool         | 0.790002918 | 0.93895094 | 1.08201606 | 1.2860206 |
| A_55_P2127 | 646.5 Detected   | 573.5 Detected   | 548.6 Detected   | 510.7 Detected   | Smcr8         | 0.789945862 | 0.84856922 | 0.89049695 | 0.9565824 |
| A_55_P2155 | 224.7 Detected   | 286.5 Detected   | 92.7 Detected    | 177.5 Detected   | Nin           | 0.789942145 | 0.41255007 | 0.61954625 | 0.3235602 |
| A_52_P4938 | 5800.6 Detected  | 4420 Detected    | 4511.7 Detected  | 4581.7 Detected  | Srpk1         | 0.789866566 | 0.77779885 | 1.03658371 | 1.0207466 |
| A_55_P1964 | 185.1 Detected   | 151.3 Detected   | 133.2 Detected   | 146.2 Detected   | Dnrtip1       | 0.789843328 | 0.71961102 | 0.96629213 | 0.8803701 |
| A_52_P3433 | 3462.1 Detected  | 3220.6 Detected  | 3754.5 Detected  | 2734.4 Detected  | Rpl7l1        | 0.789809653 | 1.08445741 | 0.84903434 | 1.1657766 |
| A_51_P3109 | 3675 Detected    | 3039 Detected    | 3353.1 Detected  | 2902.2 Detected  | Ppox          | 0.789714286 | 0.91240816 | 0.95498519 | 1.1033564 |
| A_51_P4364 | 982.3 Detected   | 620.3 Detected   | 840.9 Detected   | 775.7 Detected   | Zfp871        | 0.789677288 | 0.85605212 | 1.25052394 | 1.3556344 |
| A_55_P2077 | 5475.7 Detected  | 3701.4 Detected  | 4777.1 Detected  | 4323.6 Detected  | Ddr1          | 0.789597677 | 0.87241814 | 1.16809856 | 1.2906198 |
| A_55_P2166 | 584.9 Detected   | 656.2 Detected   | 722.1 Detected   | 461.8 Detected   | Cd44          | 0.789536673 | 1.23457001 | 0.70374886 | 1.1004267 |
| A_51_P3116 | 1440.6 Detected  | 784.5 Detected   | 1115.9 Detected  | 1137.4 Detected  | Ypel5         | 0.789532139 | 0.7746078  | 1.44984066 | 1.4224347 |
| A_55_P2444 | 1270.3 Detected  | 939.8 Detected   | 753.9 Detected   | 1002.8 Detected  | Tmem245       | 0.789419822 | 0.59348185 | 1.06703554 | 0.802192  |
| A_52_P6798 | 395.3 Detected   | 191 Detected     | 258.8 Detected   | 312 Detected     | Herc6         | 0.789273969 | 0.65469264 | 1.63350785 | 1.3549738 |
| A_55_P2077 | 22.3 Detected    | 16.7 Detected    | 17.6 Detected    | 17.6 Not Detect  | Itih4         | 0.789237668 | 0.78923767 | 1.05389222 | 1.0538922 |
| A_51_P3533 | 5036.9 Detected  | 3877.7 Detected  | 5052.9 Detected  | 3975.3 Detected  | Cript         | 0.789235442 | 1.00317656 | 1.02516956 | 1.3030663 |
| A_55_P1984 | 2548.8 Detected  | 2798.3 Detected  | 2609.3 Detected  | 2011.6 Detected  | Arrb2         | 0.789234149 | 1.02373666 | 0.71886503 | 0.932459  |
| A_51_P3793 | 3490.2 Detected  | 2272 Detected    | 3734.3 Detected  | 2754.1 Detected  | Lactb2        | 0.789095181 | 1.06993869 | 1.2121919  | 1.643618  |
| A_55_P1983 | 7710.5 Detected  | 5299.6 Detected  | 5798.2 Detected  | 6083.7 Detected  | Uhrf1bp1      | 0.78901498  | 0.75198755 | 1.14795456 | 1.0940826 |
| A_52_P4203 | 6476.5 Detected  | 5038.5 Detected  | 4693.1 Detected  | 5109.3 Detected  | Tnpo1         | 0.788898325 | 0.72463522 | 1.0140518  | 0.9314479 |
| A_55_P2012 | 1523.4 Detected  | 985 Detected     | 1425.1 Detected  | 1201.8 Detected  | Acvr2b        | 0.788893265 | 0.93547328 | 1.22010152 | 1.446802  |
| A_55_P2018 | 43.1 Detected    | 27.6 Detected    | 23.5 Detected    | 34 Not Detect    | 4930590L14Rik | 0.788863109 | 0.54524362 | 1.23188406 | 0.8514493 |

|            |                  |                  |                  |                  |               |             |            |            |           |
|------------|------------------|------------------|------------------|------------------|---------------|-------------|------------|------------|-----------|
| A_55_P2167 | 588.7 Detected   | 529 Detected     | 623.3 Detected   | 464.4 Detected   | Hdhd2         | 0.788856803 | 1.05877357 | 0.8778828  | 1.1782609 |
| A_55_P2060 | 16794.5 Detected | 15659.7 Detected | 13571.1 Detected | 13247.2 Detected | Il15ra        | 0.788782042 | 0.80806812 | 0.84594213 | 0.8666258 |
| A_66_P1262 | 30.3 Detected    | 34.5 Detected    | 19.5 Detected    | 23.9 Not Detect  | Gdf7          | 0.788778878 | 0.64356436 | 0.69275362 | 0.5652174 |
| A_55_P1988 | 725.2 Detected   | 1318.4 Detected  | 827.4 Detected   | 572 Detected     | Mrc1          | 0.788747932 | 1.14092664 | 0.43385922 | 0.6275789 |
| A_55_P2370 | 85.2 Detected    | 74.5 Detected    | 70.7 Detected    | 67.2 Detected    | D1Erd704e     | 0.788732394 | 0.82981221 | 0.90201342 | 0.9489933 |
| A_55_P2242 | 47.8 Detected    | 25.6 Detected    | 22.6 Detected    | 37.7 Not Detect  | D2Erd127e     | 0.788702929 | 0.47280335 | 1.47265625 | 0.8828125 |
| A_52_P5933 | 26.5 Detected    | 21.1 Detected    | 21.3 Detected    | 20.9 Not Detect  | Lym7          | 0.788679245 | 0.80377358 | 0.99052133 | 1.0094787 |
| A_55_P1996 | 50761.9 Detected | 38597.2 Detected | 38799.1 Detected | 40026.8 Detected | Ube2c         | 0.788520524 | 0.76433506 | 1.03703896 | 1.0052309 |
| A_51_P4112 | 11107.3 Detected | 10398.8 Detected | 11275.5 Detected | 8758.2 Detected  | Nup50         | 0.788508458 | 1.01514319 | 0.8422318  | 1.0843078 |
| A_55_P2087 | 7687.2 Detected  | 6458 Detected    | 7303.2 Detected  | 6061.3 Detected  | Tinf2         | 0.788492559 | 0.95004683 | 0.93857231 | 1.1308764 |
| A_51_P2894 | 4047.8 Detected  | 1930.3 Detected  | 2495.3 Detected  | 3191.5 Detected  | Spg11         | 0.788452987 | 0.61645832 | 1.65336994 | 1.2927006 |
| A_52_P4946 | 381.8 Detected   | 242.9 Detected   | 328.5 Detected   | 301 Detected     | Kansl1l       | 0.788370875 | 0.86039811 | 1.23919308 | 1.3524084 |
| A_55_P2076 | 835.8 Detected   | 748.4 Detected   | 769.4 Detected   | 658.9 Detected   | Wrb           | 0.788346494 | 0.92055516 | 0.88041154 | 1.0280599 |
| A_55_P2085 | 13.7 Detected    | 36.2 Detected    | 12.7 Not Detect  | 10.8 Not Detect  | Gm13119       | 0.788321168 | 0.9270073  | 0.29834254 | 0.3508287 |
| A_55_P2021 | 90147.6 Detected | 80500.8 Detected | 98960.7 Detected | 71054.8 Detected | Prmt1         | 0.788205121 | 1.097763   | 0.88265955 | 1.2293132 |
| A_55_P2029 | 38917.4 Detected | 36692.7 Detected | 33323 Detected   | 30672.6 Detected | Btn1a1        | 0.788146176 | 0.85624939 | 0.83593194 | 0.9081643 |
| A_55_P2156 | 386.5 Detected   | 251.8 Detected   | 345.9 Detected   | 304.6 Detected   | Clcn5         | 0.788098318 | 0.89495472 | 1.20969023 | 1.3737093 |
| A_52_P1343 | 9124.5 Detected  | 7578 Detected    | 7766.5 Detected  | 7190.7 Detected  | Psmd12        | 0.788065099 | 0.85116993 | 0.94889153 | 1.0248746 |
| A_51_P3493 | 988.4 Detected   | 765.3 Detected   | 794.6 Detected   | 778.9 Detected   | Npc1          | 0.788041279 | 0.80392554 | 1.01777081 | 1.0382856 |
| A_55_P1964 | 81510.3 Detected | 76675.2 Detected | 67286.2 Detected | 64232.9 Detected | Rpa1          | 0.78803415  | 0.82549322 | 0.83772719 | 0.8775484 |
| A_52_P5828 | 5866.2 Detected  | 4984.8 Detected  | 5151.5 Detected  | 4621.7 Detected  | Dgkd          | 0.787852443 | 0.87816645 | 0.92715856 | 1.0334417 |
| A_52_P1129 | 18405.5 Detected | 13210.8 Detected | 14970.4 Detected | 14500.7 Detected | Ywhab         | 0.787846024 | 0.81336557 | 1.09763981 | 1.1331941 |
| A_55_P1968 | 24.5 Detected    | 12.3 Not Detect  | 21.8 Detected    | 19.3 Not Detect  | Naalad1l      | 0.787755102 | 0.88979592 | 1.56910569 | 1.7723577 |
| A_51_P1739 | 16467 Detected   | 14531.5 Detected | 16688 Detected   | 12971.4 Detected | Pdrg1         | 0.787720896 | 1.01342078 | 0.89264013 | 1.1484017 |
| A_55_P2028 | 7609.3 Detected  | 7056.4 Detected  | 6405.3 Detected  | 5993.4 Detected  | Dnajc19       | 0.787641439 | 0.84177257 | 0.84935661 | 0.9077292 |
| A_55_P2427 | 22.6 Detected    | 14.4 Not Detect  | 10 Not Detect    | 17.8 Not Detect  | 3110068a07rik | 0.787610619 | 0.44247788 | 1.23611111 | 0.6944444 |
| A_55_P2056 | 11.3 Not Detect  | 27.2 Detected    | 18.2 Detected    | 8.9 Not Detect   | Slc4a9        | 0.787610619 | 1.61061947 | 0.32720588 | 0.6691176 |
| A_55_P2033 | 92.7 Detected    | 51.3 Detected    | 30.8 Detected    | 73 Detected      | Bahcc1        | 0.787486516 | 0.33225458 | 1.42300195 | 0.6003899 |
| A_65_P1340 | 1785.8 Detected  | 1306.4 Detected  | 1759.2 Detected  | 1406.2 Detected  | Rnf14         | 0.787434203 | 0.98510471 | 1.07639314 | 1.3466013 |
| A_55_P2166 | 8649.5 Detected  | 7870.8 Detected  | 6785.7 Detected  | 6810.9 Detected  | Rnf215        | 0.7874328   | 0.78451934 | 0.8653377  | 0.862136  |
| A_55_P1991 | 94828.4 Detected | 85564 Detected   | 76806 Detected   | 74668.8 Detected | Fam219a       | 0.787409679 | 0.80994723 | 0.87266607 | 0.8976439 |
| A_51_P4867 | 22.1 Detected    | 27 Detected      | 15.9 Not Detect  | 17.4 Not Detect  | Tmem247       | 0.787330317 | 0.71945701 | 0.64444444 | 0.5888889 |
| A_55_P2074 | 29543.4 Detected | 18928.4 Detected | 26976 Detected   | 23260 Detected   | Ppm1b         | 0.787316287 | 0.91309734 | 1.22884132 | 1.4251601 |
| A_55_P2173 | 23.5 Detected    | 18.9 Detected    | 23.1 Detected    | 18.5 Not Detect  | Pcdhb1        | 0.787234043 | 0.98297872 | 0.97883598 | 1.2222222 |
| A_55_P2184 | 1869.8 Detected  | 1663.1 Detected  | 1771.2 Detected  | 1471.7 Detected  | Rpap2         | 0.787089528 | 0.94726709 | 0.88491372 | 1.0649991 |
| A_55_P1957 | 118.8 Detected   | 89 Detected      | 141.8 Detected   | 93.5 Detected    | Obfc1         | 0.787037037 | 1.19360269 | 1.0505618  | 1.5932584 |
| A_51_P4976 | 216 Detected     | 175.1 Detected   | 97.2 Detected    | 170 Detected     | Ntn4          | 0.787037037 | 0.45       | 0.97087379 | 0.5551114 |
| A_55_P1968 | 46 Detected      | 42.4 Detected    | 31.3 Detected    | 36.2 Not Detect  | Rpgr          | 0.786956522 | 0.68043478 | 0.85377358 | 0.7382075 |
| A_55_P2258 | 74.6 Detected    | 88.3 Detected    | 34.1 Detected    | 58.7 Detected    | 5230400M03Rik | 0.786863271 | 0.45710456 | 0.66477916 | 0.3861835 |
| A_52_P5561 | 83328.3 Detected | 57591.2 Detected | 76761.8 Detected | 65562.9 Detected | Vapb          | 0.786802323 | 0.92119724 | 1.13841872 | 1.3328738 |

|            |         |            |         |            |         |            |         |            |               |             |            |            |           |
|------------|---------|------------|---------|------------|---------|------------|---------|------------|---------------|-------------|------------|------------|-----------|
| A_55_P1971 | 3479.8  | Detected   | 2285.6  | Detected   | 2966.7  | Detected   | 2737.6  | Detected   | Gm4425        | 0.78671188  | 0.852549   | 1.19775989 | 1.2979961 |
| A_55_P2119 | 11697.9 | Detected   | 6927.6  | Detected   | 11157.5 | Detected   | 9202.7  | Detected   | Ggh           | 0.786696758 | 0.95380367 | 1.32841099 | 1.6105866 |
| A_55_P2186 | 3066.6  | Detected   | 2900.6  | Detected   | 2581.1  | Detected   | 2412.4  | Detected   | Gm1976        | 0.786669275 | 0.84168134 | 0.83169    | 0.8898504 |
| A_65_P0687 | 1185    | Detected   | 1073.5  | Detected   | 1073.8  | Detected   | 932.2   | Detected   | Fam210a       | 0.786666667 | 0.90616034 | 0.86837448 | 1.0002795 |
| A_55_P2059 | 70.3    | Detected   | 38.4    | Detected   | 3.2     | Not Detect | 55.3    | Detected   | Foxf1         | 0.786628734 | 0.0455192  | 1.44010417 | 0.0833333 |
| A_65_P2017 | 1443.8  | Detected   | 1211.2  | Detected   | 1043.4  | Detected   | 1135.7  | Detected   | Jade1         | 0.786604793 | 0.72267627 | 0.93766513 | 0.8614597 |
| A_55_P1976 | 591.6   | Detected   | 422.6   | Detected   | 555     | Detected   | 465.3   | Detected   | Strn          | 0.786511156 | 0.93813387 | 1.10104117 | 1.3132986 |
| A_55_P2053 | 139.1   | Detected   | 85.2    | Detected   | 99.1    | Detected   | 109.4   | Detected   | Myo9a         | 0.786484543 | 0.7124371  | 1.28403756 | 1.1631455 |
| A_51_P3653 | 98.3    | Detected   | 89.9    | Detected   | 78.1    | Detected   | 77.3    | Detected   | Pcf11         | 0.78636826  | 0.79450661 | 0.85984427 | 0.868743  |
| A_52_P1711 | 4151.1  | Detected   | 3375.7  | Detected   | 3111.2  | Detected   | 3264.1  | Detected   | Znrf1         | 0.786321698 | 0.74948809 | 0.96694019 | 0.9216459 |
| A_55_P1993 | 29346   | Detected   | 21263.7 | Detected   | 24361.6 | Detected   | 23075.2 | Detected   | Ftsj1         | 0.786315    | 0.83015062 | 1.08519213 | 1.1456896 |
| A_55_P1978 | 668.1   | Detected   | 528     | Detected   | 667.1   | Detected   | 525.3   | Detected   | Zfp64         | 0.786259542 | 0.99850322 | 0.99488636 | 1.263447  |
| A_55_P2106 | 3549.4  | Detected   | 2416.9  | Detected   | 4326.5  | Detected   | 2790.7  | Detected   | Clcn5         | 0.786245563 | 1.21893841 | 1.15466093 | 1.790103  |
| A_52_P5436 | 27.6    | Detected   | 31.7    | Detected   | 21.1    | Detected   | 21.7    | Not Detect | Pibf1         | 0.786231884 | 0.76449275 | 0.68454259 | 0.6656151 |
| A_55_P2025 | 689.7   | Detected   | 482.2   | Detected   | 726.5   | Detected   | 542.2   | Detected   | C330007P06Rik | 0.786138901 | 1.05335653 | 1.1244297  | 1.5066363 |
| A_52_P1624 | 272.4   | Detected   | 204.9   | Detected   | 280.1   | Detected   | 214.1   | Detected   | Bgn           | 0.785976505 | 1.02826725 | 1.04489995 | 1.3670083 |
| A_55_P2033 | 75855.4 | Detected   | 64671.6 | Detected   | 93928.5 | Detected   | 59618.3 | Detected   | Prdx5         | 0.785946683 | 1.23825726 | 0.92186215 | 1.4523918 |
| A_55_P2030 | 43.9    | Detected   | 27.4    | Detected   | 25      | Detected   | 34.5    | Not Detect | Dnah6         | 0.785876993 | 0.56947608 | 1.25912409 | 0.9124088 |
| A_55_P2099 | 710.8   | Detected   | 537     | Detected   | 504.7   | Detected   | 558.5   | Detected   | Ranbp9        | 0.785734384 | 0.71004502 | 1.04003724 | 0.939851  |
| A_55_P2024 | 36.4    | Detected   | 23.4    | Detected   | 32.8    | Detected   | 28.6    | Not Detect | Dnah17        | 0.785714286 | 0.9010989  | 1.22222222 | 1.4017094 |
| A_51_P5206 | 12.6    | Not Detect | 13.9    | Not Detect | 18      | Detected   | 9.9     | Not Detect | Mslnl         | 0.785714286 | 1.42857143 | 0.71223022 | 1.294964  |
| A_55_P2180 | 98.9    | Detected   | 172.6   | Detected   | 104.1   | Detected   | 77.7    | Detected   | AA684185      | 0.785642063 | 1.05257836 | 0.45017381 | 0.6031286 |
| A_52_P2805 | 881.7   | Detected   | 725.6   | Detected   | 638.6   | Detected   | 692.7   | Detected   | Gm14124       | 0.785641375 | 0.72428264 | 0.95465821 | 0.8800992 |
| A_55_P2081 | 58.3    | Detected   | 40.4    | Detected   | 37.7    | Detected   | 45.8    | Detected   | Zfp945        | 0.785591767 | 0.64665523 | 1.13366337 | 0.9331683 |
| A_52_P5921 | 58.3    | Detected   | 58      | Detected   | 92.4    | Detected   | 45.8    | Detected   | Zkscan8       | 0.785591767 | 1.58490566 | 0.78965517 | 1.5931034 |
| A_51_P2760 | 2997    | Detected   | 1449.9  | Detected   | 6403.7  | Detected   | 2354.4  | Detected   | Phyh          | 0.785585586 | 2.13670337 | 1.62383613 | 4.4166494 |
| A_52_P3347 | 489     | Detected   | 313.9   | Detected   | 266     | Detected   | 384.1   | Detected   | Agap3         | 0.785480573 | 0.54396728 | 1.2236381  | 0.8474036 |
| A_55_P1986 | 8544.6  | Detected   | 7518.5  | Detected   | 8776    | Detected   | 6710.1  | Detected   | Ppil1         | 0.785302998 | 1.02708143 | 0.89247855 | 1.1672541 |
| A_55_P2155 | 1676.7  | Detected   | 1973.3  | Detected   | 1737.7  | Detected   | 1316.7  | Detected   | Tmem9         | 0.785292539 | 1.03638099 | 0.66725789 | 0.8806061 |
| A_55_P1991 | 18376.8 | Detected   | 11710.8 | Detected   | 17566.9 | Detected   | 14431.1 | Detected   | Obfc1         | 0.78528906  | 0.95592813 | 1.23228985 | 1.5000598 |
| A_55_P1971 | 163     | Detected   | 252     | Detected   | 89.5    | Detected   | 128     | Detected   | Cd1d2         | 0.785276074 | 0.54907975 | 0.50793651 | 0.3551587 |
| A_51_P1722 | 26693.9 | Detected   | 16731.5 | Detected   | 28995.7 | Detected   | 20961.3 | Detected   | Gsdmd         | 0.785246817 | 1.08622944 | 1.25280459 | 1.7330006 |
| A_55_P1979 | 15865.4 | Detected   | 12338   | Detected   | 10673.7 | Detected   | 12458.1 | Detected   | Sepn1         | 0.785237057 | 0.67276589 | 1.00973415 | 0.8651078 |
| A_55_P2156 | 4205.6  | Detected   | 3604    | Detected   | 4028.5  | Detected   | 3301.4  | Detected   | Nt5c3b        | 0.785000951 | 0.95788948 | 0.91603774 | 1.1177858 |
| A_55_P1974 | 20      | Detected   | 16.7    | Detected   | 17.4    | Detected   | 15.7    | Not Detect | Grin2a        | 0.785       | 0.87       | 0.94011976 | 1.0419162 |
| A_55_P2114 | 253.9   | Detected   | 206.9   | Detected   | 227.5   | Detected   | 199.3   | Detected   | Zfp111        | 0.784954707 | 0.89602206 | 0.96326728 | 1.099565  |
| A_51_P2549 | 13948.7 | Detected   | 12039.2 | Detected   | 12686   | Detected   | 10948.4 | Detected   | Rfc2          | 0.784904686 | 0.90947543 | 0.90939597 | 1.0537245 |
| A_55_P1995 | 1615    | Detected   | 988.8   | Detected   | 1476.8  | Detected   | 1267.6  | Detected   | LOC100504873  | 0.784891641 | 0.91442724 | 1.28195793 | 1.4935275 |
| A_55_P2129 | 59.5    | Detected   | 38.7    | Detected   | 53.3    | Detected   | 46.7    | Not Detect | Sh3pdx2a      | 0.78487395  | 0.89579832 | 1.20671835 | 1.377261  |
| A_55_P2099 | 32940.3 | Detected   | 29811.1 | Detected   | 27919.7 | Detected   | 25851.9 | Detected   | Atxn7         | 0.784810703 | 0.84758487 | 0.86719041 | 0.9365538 |

|            |         |            |          |            |          |            |          |            |               |             |            |            |           |
|------------|---------|------------|----------|------------|----------|------------|----------|------------|---------------|-------------|------------|------------|-----------|
| A_55_P1956 | 115.7   | Detected   | 82.9     | Detected   | 99       | Detected   | 90.8     | Detected   | Zfp60         | 0.784788245 | 0.85566119 | 1.09529554 | 1.1942099 |
| A_52_P1590 | 211.2   | Detected   | 163.3    | Detected   | 219.5    | Detected   | 165.7    | Detected   | Cds2          | 0.784564394 | 1.03929924 | 1.01469688 | 1.3441519 |
| A_55_P1959 | 3541.8  | Detected   | 2600.2   | Detected   | 2908.8   | Detected   | 2778.5   | Detected   | Helz2         | 0.784488113 | 0.82127732 | 1.06857165 | 1.1186832 |
| A_51_P2760 | 39097.9 | Detected   | 34081.6  | Detected   | 39389.4  | Detected   | 30671.4  | Detected   | Txndc15       | 0.784476916 | 1.00745564 | 0.89994014 | 1.155738  |
| A_51_P1208 | 54.7    | Detected   | 119.7    | Detected   | 17.5     | Not Detect | 42.9     | Not Detect | Mmp10         | 0.784277879 | 0.31992687 | 0.35839599 | 0.1461988 |
| A_55_P2068 | 2603.1  | Detected   | 2169.1   | Detected   | 1995.4   | Detected   | 2041.4   | Detected   | LOC101055823  | 0.784218816 | 0.76654758 | 0.94112766 | 0.9199207 |
| A_52_P4186 | 66816.5 | Detected   | 50998.5  | Detected   | 49083.1  | Detected   | 52391.7  | Detected   | Plp2          | 0.784113206 | 0.7345955  | 1.02731845 | 0.962442  |
| A_55_P2186 | 273.7   | Detected   | 247.6    | Detected   | 152.9    | Detected   | 214.6    | Detected   | Trappc2       | 0.78407015  | 0.55864085 | 0.86672052 | 0.6175283 |
| A_55_P2181 | 244.4   | Detected   | 222      | Detected   | 204.1    | Detected   | 191.6    | Detected   | Tmem54        | 0.78396072  | 0.83510638 | 0.86306306 | 0.9193694 |
| A_55_P2045 | 753.6   | Detected   | 1534.7   | Detected   | 143.6    | Detected   | 590.7    | Detected   | Rassf5        | 0.78383758  | 0.19055202 | 0.38489607 | 0.0935688 |
| A_55_P2340 | 14.8    | Detected   | 12.6     | Not Detect | 6.6      | Not Detect | 11.6     | Not Detect | B230114P17Rik | 0.783783784 | 0.44594595 | 0.92063492 | 0.5238095 |
| A_55_P2372 | 60.1    | Detected   | 51.8     | Detected   | 59.8     | Detected   | 47.1     | Not Detect | 9030607L02Rik | 0.783693844 | 0.99500832 | 0.90926641 | 1.1544402 |
| A_55_P2068 | 16843   | Detected   | 14890    | Detected   | 16601.6  | Detected   | 13198    | Detected   | Cdc5l         | 0.783589622 | 0.98566764 | 0.88636669 | 1.1149496 |
| A_55_P2091 | 41951.3 | Detected   | 30278.9  | Detected   | 41267.8  | Detected   | 32864.3  | Detected   | Nudt3         | 0.783391695 | 0.9837073  | 1.08538619 | 1.3629227 |
| A_55_P1967 | 672.9   | Detected   | 1200.9   | Detected   | 228.6    | Detected   | 527.1    | Detected   | Foxc1         | 0.783325903 | 0.33972358 | 0.43892081 | 0.1903572 |
| A_55_P1971 | 2513.7  | Detected   | 2088.7   | Detected   | 1661.8   | Detected   | 1968.8   | Detected   | BC026590      | 0.783227911 | 0.66109719 | 0.94259587 | 0.7956145 |
| A_55_P2019 | 29.5    | Detected   | 41.4     | Detected   | 18.7     | Detected   | 23.1     | Not Detect | Htr1d         | 0.783050847 | 0.63389831 | 0.55797101 | 0.4516908 |
| A_66_P1296 | 40.1    | Detected   | 24.4     | Detected   | 26.9     | Detected   | 31.4     | Not Detect | Gm6225        | 0.783042394 | 0.67082294 | 1.28688525 | 1.102459  |
| A_55_P2060 | 8268.4  | Detected   | 2284.2   | Detected   | 6905.7   | Detected   | 6474.5   | Detected   | Mras          | 0.783041459 | 0.83519181 | 2.83447159 | 3.0232467 |
| A_52_P6679 | 244.1   | Detected   | 249.8    | Detected   | 216.6    | Detected   | 191.1    | Detected   | Pcdhga9       | 0.782875871 | 0.88734125 | 0.76501201 | 0.8670937 |
| A_66_P1053 | 18606.7 | Detected   | 13822.1  | Detected   | 15299.5  | Detected   | 14565.4  | Detected   | Adnp          | 0.782804044 | 0.82225757 | 1.0537762  | 1.1068868 |
| A_55_P1999 | 6659.2  | Detected   | 5282.8   | Detected   | 6501.5   | Detected   | 5212.8   | Detected   | Zfp668        | 0.782796732 | 0.97631848 | 0.98674945 | 1.2306921 |
| A_66_P1289 | 3414.8  | Detected   | 1325.2   | Detected   | 2568.7   | Detected   | 2672.8   | Detected   | Numbl         | 0.782710554 | 0.75222561 | 2.01690311 | 1.9383489 |
| A_55_P2002 | 16867.2 | Detected   | 16791.9  | Detected   | 16147.4  | Detected   | 13201.3  | Detected   | Ddx18         | 0.782661023 | 0.95732546 | 0.78617071 | 0.9616184 |
| A_55_P2146 | 11.5    | Not Detect | 17.4     | Detected   | 10.4     | Not Detect | 9        | Not Detect | Olfrc481      | 0.782608696 | 0.90434783 | 0.51724138 | 0.5977011 |
| A_51_P4419 | 16.1    | Detected   | 22.3     | Detected   | 9.5      | Not Detect | 12.6     | Not Detect | Hsd17b2       | 0.782608696 | 0.59006211 | 0.56502242 | 0.426009  |
| A_52_P3309 | 4211.6  | Detected   | 3335.4   | Detected   | 4302.7   | Detected   | 3296     | Detected   | Lin9          | 0.782600437 | 1.02163073 | 0.98818732 | 1.2900102 |
| A_51_P3177 | 505.9   | Detected   | 360.4    | Detected   | 493.3    | Detected   | 395.9    | Detected   | Pcgf2         | 0.782565724 | 0.97509389 | 1.09850166 | 1.3687569 |
| A_52_P5089 | 19.3    | Detected   | 16.5     | Not Detect | 23.4     | Detected   | 15.1     | Not Detect | Evi2a-evi2b   | 0.78238342  | 1.21243523 | 0.91515152 | 1.4181818 |
| A_55_P2178 | 321.2   | Detected   | 92.9     | Detected   | 378      | Detected   | 251.3    | Detected   | Ugt1a10       | 0.78237858  | 1.17683686 | 2.7050592  | 4.0688913 |
| A_51_P3545 | 41621.3 | Detected   | 26268.1  | Detected   | 32454.6  | Detected   | 32555.3  | Detected   | Rab35         | 0.782178836 | 0.7797594  | 1.23934735 | 1.2355138 |
| A_55_P1984 | 41.7    | Detected   | 36       | Detected   | 34.2     | Detected   | 32.6     | Not Detect | Depdc5        | 0.78177458  | 0.82014388 | 0.90555556 | 0.95      |
| A_52_P1904 | 6606.7  | Detected   | 4340.4   | Detected   | 6619.3   | Detected   | 5164.9   | Detected   | Ifnar2        | 0.781766994 | 1.00190715 | 1.18995945 | 1.5250438 |
| A_55_P1979 | 3305.7  | Detected   | 2044.4   | Detected   | 2758.3   | Detected   | 2584.2   | Detected   | Zfp946        | 0.78174063  | 0.83440724 | 1.26403835 | 1.3491978 |
| A_55_P2199 | 89.8    | Detected   | 59.9     | Detected   | 55.9     | Detected   | 70.2     | Detected   | 5830443J22Rik | 0.781737194 | 0.62249443 | 1.17195326 | 0.933222  |
| A_55_P2175 | 10688.5 | Detected   | 9239.9   | Detected   | 11021.2  | Detected   | 8354.7   | Detected   | Reep3         | 0.781653179 | 1.03112691 | 0.9041981  | 1.1927835 |
| A_55_P2126 | 137201  | Detected   | 125556.3 | Detected   | 128471.5 | Detected   | 107242.7 | Detected   | Rpl7          | 0.781646635 | 0.93637437 | 0.85414033 | 1.0232183 |
| A_52_P8879 | 472.7   | Detected   | 441      | Detected   | 304.3    | Detected   | 369.4    | Detected   | Zfp933        | 0.781468162 | 0.64374868 | 0.83764172 | 0.6900227 |
| A_55_P2174 | 30966.2 | Detected   | 21272.2  | Detected   | 24220.5  | Detected   | 24198.6  | Detected   | Brd4          | 0.781452035 | 0.78215926 | 1.13756922 | 1.1385987 |
| A_51_P3753 | 12692.4 | Detected   | 8597.1   | Detected   | 12245.6  | Detected   | 9918.5   | Detected   | Gemin7        | 0.781451892 | 0.96479783 | 1.15370299 | 1.4243873 |

|            |          |            |          |            |         |            |         |            |               |             |            |            |           |
|------------|----------|------------|----------|------------|---------|------------|---------|------------|---------------|-------------|------------|------------|-----------|
| A_51_P4559 | 1078.4   | Detected   | 1082     | Detected   | 551.2   | Detected   | 842.7   | Detected   | F2r1          | 0.78143546  | 0.5111276  | 0.77883549 | 0.509427  |
| A_52_P5536 | 291.2    | Detected   | 204.6    | Detected   | 238.5   | Detected   | 227.5   | Detected   | Ttc17         | 0.78125     | 0.81902473 | 1.11192571 | 1.1656891 |
| A_55_P2118 | 671.5    | Detected   | 428.9    | Detected   | 631.5   | Detected   | 524.6   | Detected   | Lasp1         | 0.781236039 | 0.94043187 | 1.22312893 | 1.4723712 |
| A_51_P4740 | 26.5     | Detected   | 18.6     | Detected   | 29.6    | Detected   | 20.7    | Not Detect | Erv3          | 0.781132075 | 1.11698113 | 1.11290323 | 1.5913978 |
| A_55_P2157 | 1421.8   | Detected   | 1364.3   | Detected   | 1288.9  | Detected   | 1110.5  | Detected   | Tagap1        | 0.781052187 | 0.90652694 | 0.81397053 | 0.9447336 |
| A_55_P2142 | 122349.8 | Detected   | 133943.9 | Detected   | 91311.7 | Detected   | 95560.7 | Detected   | Ywhaq         | 0.781045004 | 0.74631671 | 0.71343824 | 0.681716  |
| A_55_P2085 | 5191.4   | Detected   | 4024.7   | Detected   | 3586.3  | Detected   | 4053.8  | Detected   | Meaf6         | 0.780868359 | 0.69081558 | 1.00723035 | 0.8910726 |
| A_55_P2018 | 21.9     | Detected   | 16       | Not Detect | 14.1    | Not Detect | 17.1    | Not Detect | Gm14085       | 0.780821918 | 0.64383562 | 1.06875    | 0.88125   |
| A_55_P2066 | 33.3     | Detected   | 3.8      | Not Detect | 95.3    | Detected   | 26      | Not Detect | Lcp1          | 0.780780781 | 2.86186186 | 6.84210526 | 25.078947 |
| A_52_P4758 | 338.9    | Detected   | 441      | Detected   | 270.1   | Detected   | 264.6   | Detected   | Nol10         | 0.780761287 | 0.79699026 | 0.6        | 0.6124717 |
| A_55_P2013 | 76.6     | Detected   | 66       | Detected   | 55.3    | Detected   | 59.8    | Detected   | Oxtr          | 0.780678851 | 0.72193211 | 0.90606061 | 0.8378788 |
| A_55_P2010 | 1587.3   | Detected   | 3349.7   | Detected   | 1057.1  | Detected   | 1239.1  | Detected   | Zxdc          | 0.780633781 | 0.66597367 | 0.36991372 | 0.3155805 |
| A_55_P2173 | 55218.4  | Detected   | 49690.5  | Detected   | 45327.9 | Detected   | 43105.3 | Detected   | Gm626         | 0.780632905 | 0.82088398 | 0.86747567 | 0.9122045 |
| A_51_P2655 | 1213.7   | Detected   | 859      | Detected   | 1294    | Detected   | 947.2   | Detected   | Rbm18         | 0.780423498 | 1.06616132 | 1.10267753 | 1.5064028 |
| A_65_P0124 | 1732.6   | Detected   | 1231.7   | Detected   | 1195.8  | Detected   | 1352.1  | Detected   | Hjurp         | 0.780387856 | 0.69017661 | 1.09775108 | 0.9708533 |
| A_52_P5430 | 13.2     | Not Detect | 34.2     | Detected   | 5.2     | Not Detect | 10.3    | Not Detect | Dhtkd1        | 0.78030303  | 0.39393939 | 0.30116959 | 0.1520468 |
| A_55_P2102 | 7470.9   | Detected   | 5719     | Detected   | 4954.8  | Detected   | 5829.5  | Detected   | Lamp2         | 0.780294208 | 0.66321327 | 1.01932156 | 0.8663752 |
| A_51_P1801 | 380.5    | Detected   | 260.3    | Detected   | 227.9   | Detected   | 296.9   | Detected   | Gm16223       | 0.780289093 | 0.59894875 | 1.14060699 | 0.8755282 |
| A_55_P2358 | 19.1     | Detected   | 11.6     | Not Detect | 13.3    | Not Detect | 14.9    | Not Detect | 1700111N16Rik | 0.780104712 | 0.69633508 | 1.28448276 | 1.1465517 |
| A_51_P2165 | 17371.2  | Detected   | 20819.3  | Detected   | 5098.9  | Detected   | 13551.1 | Detected   | Wfs1          | 0.780090034 | 0.29352607 | 0.65089124 | 0.2449122 |
| A_55_P1975 | 24.1     | Detected   | 30.7     | Detected   | 25      | Detected   | 18.8    | Not Detect | Crygs         | 0.780082988 | 1.0373444  | 0.61237785 | 0.8143322 |
| A_55_P2132 | 3672.3   | Detected   | 2992.6   | Detected   | 3254.4  | Detected   | 2864.6  | Detected   | Fastkd3       | 0.780056096 | 0.88620211 | 0.95722783 | 1.0874825 |
| A_52_P6485 | 1102.1   | Detected   | 1401.2   | Detected   | 1173.3  | Detected   | 859.6   | Detected   | Gorab         | 0.77996552  | 1.06460394 | 0.61347417 | 0.8373537 |
| A_52_P5185 | 55.9     | Detected   | 30.2     | Detected   | 54.3    | Detected   | 43.6    | Not Detect | Tmem194b      | 0.779964222 | 0.97137746 | 1.44370861 | 1.7980132 |
| A_52_P4232 | 40.9     | Detected   | 48.3     | Detected   | 6.4     | Not Detect | 31.9    | Not Detect | Pde4b         | 0.7799511   | 0.15647922 | 0.66045549 | 0.1325052 |
| A_55_P2282 | 7171.3   | Detected   | 5490.6   | Detected   | 5215.7  | Detected   | 5593.2  | Detected   | Celf1         | 0.77994227  | 0.72730188 | 1.01868648 | 0.9499326 |
| A_55_P2129 | 30.9     | Detected   | 17.2     | Not Detect | 38.3    | Detected   | 24.1    | Not Detect | Trerf1        | 0.779935275 | 1.2394822  | 1.40116279 | 2.2267442 |
| A_52_P8615 | 12465    | Detected   | 10368.5  | Detected   | 11399.7 | Detected   | 9721.1  | Detected   | Mtx2          | 0.779871641 | 0.9145367  | 0.93756088 | 1.0994551 |
| A_55_P2117 | 1370.1   | Detected   | 1046.3   | Detected   | 786.2   | Detected   | 1068.3  | Detected   | Mxd4          | 0.779724108 | 0.57382673 | 1.02102647 | 0.7514097 |
| A_51_P1148 | 6712     | Detected   | 6357.4   | Detected   | 5881    | Detected   | 5233.2  | Detected   | Ikbkap        | 0.779678188 | 0.8761919  | 0.8231667  | 0.9250637 |
| A_55_P1975 | 4021.2   | Detected   | 3398.5   | Detected   | 2025.9  | Detected   | 3135.1  | Detected   | St3gal3       | 0.779642893 | 0.50380483 | 0.92249522 | 0.5961159 |
| A_55_P1957 | 88761.4  | Detected   | 67391.9  | Detected   | 67299   | Detected   | 69192.9 | Detected   | Nono          | 0.779538178 | 0.7582012  | 1.02672428 | 0.9986215 |
| A_65_P2079 | 1266.8   | Detected   | 1173.2   | Detected   | 1235.6  | Detected   | 987.5   | Detected   | Abi2          | 0.779523208 | 0.97537101 | 0.84171497 | 1.0531879 |
| A_52_P2382 | 5087.5   | Detected   | 4623.4   | Detected   | 2889.3  | Detected   | 3965.8  | Detected   | Sertad2       | 0.779518428 | 0.56792138 | 0.85776701 | 0.6249297 |
| A_55_P2102 | 16948.6  | Detected   | 13384.5  | Detected   | 16287.3 | Detected   | 13210.5 | Detected   | Cox7a2l       | 0.77944491  | 0.96098203 | 0.98699989 | 1.2168777 |
| A_55_P2067 | 1489.1   | Detected   | 1216.4   | Detected   | 855.8   | Detected   | 1160.6  | Detected   | Dpf1          | 0.779396951 | 0.57470956 | 0.95412693 | 0.7035515 |
| A_55_P2105 | 110.6    | Detected   | 84.8     | Detected   | 53.2    | Detected   | 86.2    | Detected   | BC024139      | 0.779385172 | 0.48101266 | 1.01650943 | 0.6273585 |
| A_52_P5229 | 320.9    | Detected   | 352.9    | Detected   | 388     | Detected   | 250.1   | Detected   | Ssbp2         | 0.77937052  | 1.20909941 | 0.70869935 | 1.0994616 |
| A_51_P3944 | 4720.2   | Detected   | 3412.8   | Detected   | 3962.8  | Detected   | 3678.3  | Detected   | Tcf3          | 0.779267828 | 0.8395407  | 1.07779536 | 1.161158  |
| A_51_P1561 | 733.4    | Detected   | 1059.1   | Detected   | 657.3   | Detected   | 571.5   | Detected   | Phlpp1        | 0.779247341 | 0.89623671 | 0.5396091  | 0.6206213 |



|            |          |            |         |            |         |            |         |            |               |             |            |            |           |
|------------|----------|------------|---------|------------|---------|------------|---------|------------|---------------|-------------|------------|------------|-----------|
| A_51_P2626 | 1074     | Detected   | 1040.9  | Detected   | 992.9   | Detected   | 836.9   | Detected   | Rbm38         | 0.779236499 | 0.9244879  | 0.80401576 | 0.9538861 |
| A_55_P2095 | 60.2     | Detected   | 55.4    | Detected   | 50.7    | Detected   | 46.9    | Not Detect | Slc8a2        | 0.779069767 | 0.84219269 | 0.8465704  | 0.9151625 |
| A_55_P1965 | 13513.7  | Detected   | 10668.6 | Detected   | 9915.8  | Detected   | 10525.6 | Detected   | Ctc1          | 0.778883651 | 0.73375907 | 0.98659618 | 0.9294378 |
| A_55_P2043 | 26611.6  | Detected   | 22128.4 | Detected   | 26885.6 | Detected   | 20726.4 | Detected   | Cmtr1         | 0.778848322 | 1.01029626 | 0.9366425  | 1.2149817 |
| A_51_P4975 | 10494.5  | Detected   | 6382.8  | Detected   | 8724.4  | Detected   | 8173.1  | Detected   | Vps18         | 0.778798418 | 0.8313307  | 1.28048819 | 1.3668609 |
| A_55_P2001 | 94657.2  | Detected   | 64785.5 | Detected   | 80762.7 | Detected   | 73718.5 | Detected   | Ehmt2         | 0.778794429 | 0.85321243 | 1.13788579 | 1.2466169 |
| A_51_P4622 | 5491.5   | Detected   | 3599.2  | Detected   | 4476    | Detected   | 4276.4  | Detected   | Aida          | 0.778730766 | 0.81507785 | 1.18815292 | 1.2436097 |
| A_51_P3097 | 1391.7   | Detected   | 1171.9  | Detected   | 1351.1  | Detected   | 1083.7  | Detected   | Usp40         | 0.778687936 | 0.97082705 | 0.92473761 | 1.1529141 |
| A_55_P2168 | 139.6    | Detected   | 82.9    | Detected   | 72.8    | Detected   | 108.7   | Detected   | 4732440D04Rik | 0.778653295 | 0.52148997 | 1.31121834 | 0.8781665 |
| A_55_P2182 | 13.1     | Not Detect | 23      | Detected   | 12.6    | Not Detect | 10.2    | Not Detect | Zfp352        | 0.778625954 | 0.96183206 | 0.44347826 | 0.5478261 |
| A_66_P1093 | 14       | Not Detect | 17.1    | Not Detect | 24.9    | Detected   | 10.9    | Not Detect | AF366264      | 0.778571429 | 1.77857143 | 0.6374269  | 1.4561404 |
| A_55_P2054 | 14       | Not Detect | 34.6    | Detected   | 18.4    | Detected   | 10.9    | Not Detect | Defa-ps1      | 0.778571429 | 1.31428571 | 0.3150289  | 0.5317919 |
| A_55_P2071 | 127701.8 | Detected   | 118130  | Detected   | 145474  | Detected   | 99414.8 | Detected   | Rpl36         | 0.778491768 | 1.13916953 | 0.84157115 | 1.2314738 |
| A_55_P2052 | 18673.8  | Detected   | 16603   | Detected   | 14898.3 | Detected   | 14537   | Detected   | Dpysl5        | 0.77847037  | 0.79781833 | 0.87556466 | 0.8973258 |
| A_55_P2062 | 13670.2  | Detected   | 16179.4 | Detected   | 11882.1 | Detected   | 10640.7 | Detected   | Ube2e1        | 0.778386563 | 0.86919723 | 0.65766963 | 0.7343968 |
| A_55_P1958 | 16631.8  | Detected   | 18006.8 | Detected   | 16070.8 | Detected   | 12945.2 | Detected   | Tcof1         | 0.778340288 | 0.96626944 | 0.71890619 | 0.8924851 |
| A_52_P1886 | 3606.8   | Detected   | 1724.5  | Detected   | 4643.7  | Detected   | 2807.2  | Detected   | Pvrl2         | 0.778307641 | 1.28748475 | 1.62783415 | 2.6927805 |
| A_51_P2212 | 21.2     | Detected   | 20.7    | Detected   | 19.6    | Detected   | 16.5    | Not Detect | Tspan32       | 0.778301887 | 0.9245283  | 0.79710145 | 0.9468599 |
| A_51_P2107 | 23       | Detected   | 19.1    | Detected   | 11      | Not Detect | 17.9    | Not Detect | Vmn1r82       | 0.77826087  | 0.47826087 | 0.93717277 | 0.5759162 |
| A_55_P1979 | 2477.1   | Detected   | 1542.2  | Detected   | 1624.3  | Detected   | 1927.6  | Detected   | Tmem189       | 0.778168019 | 0.65572645 | 1.24990274 | 1.0532356 |
| A_52_P2043 | 178.5    | Detected   | 232.3   | Detected   | 173     | Detected   | 138.9   | Detected   | Spry4         | 0.778151261 | 0.96918768 | 0.59793371 | 0.7447266 |
| A_51_P1794 | 7231.6   | Detected   | 4806.4  | Detected   | 5846.8  | Detected   | 5627.2  | Detected   | Fam92a        | 0.778140384 | 0.80850711 | 1.1707723  | 1.2164614 |
| A_55_P2085 | 61.3     | Detected   | 39.9    | Detected   | 43.9    | Detected   | 47.7    | Detected   | Prdm10        | 0.778140294 | 0.71615008 | 1.19548872 | 1.1002506 |
| A_55_P2044 | 203.7    | Detected   | 163.3   | Detected   | 236.5   | Detected   | 158.5   | Detected   | Lipt2         | 0.778105056 | 1.16102111 | 0.97060625 | 1.4482547 |
| A_51_P4607 | 1456.1   | Detected   | 1065.9  | Detected   | 1065.7  | Detected   | 1132.9  | Detected   | Smyd4         | 0.778037223 | 0.73188655 | 1.06285768 | 0.9998124 |
| A_52_P6223 | 3189.9   | Detected   | 2112.6  | Detected   | 2227.2  | Detected   | 2481.7  | Detected   | Usp9x         | 0.777986771 | 0.69820371 | 1.17471362 | 1.054246  |
| A_52_P2199 | 1459.6   | Detected   | 977.1   | Detected   | 981.6   | Detected   | 1135.5  | Detected   | Cdan1         | 0.777952864 | 0.67251302 | 1.16211237 | 1.0046055 |
| A_51_P1640 | 61429.1  | Detected   | 54282.9 | Detected   | 54039.7 | Detected   | 47788.4 | Detected   | Tcp1          | 0.777944004 | 0.87970848 | 0.88035827 | 0.9955198 |
| A_52_P1977 | 1414     | Detected   | 1204.1  | Detected   | 1344.4  | Detected   | 1099.8  | Detected   | Xrcc2         | 0.777793494 | 0.95077793 | 0.91337929 | 1.1165186 |
| A_51_P1300 | 13.5     | Not Detect | 88.5    | Detected   | 3.8     | Not Detect | 10.5    | Not Detect | Lrmp          | 0.777777778 | 0.28148148 | 0.11864407 | 0.0429379 |
| A_55_P2225 | 52.6     | Detected   | 18.7    | Detected   | 33.6    | Detected   | 40.9    | Not Detect | AW555355      | 0.77756654  | 0.63878327 | 2.18716578 | 1.7967914 |
| A_55_P2083 | 523.5    | Detected   | 394.6   | Detected   | 597     | Detected   | 407     | Detected   | Rbm12         | 0.777459408 | 1.14040115 | 1.03142423 | 1.5129245 |
| A_55_P2087 | 4078.6   | Detected   | 3681.5  | Detected   | 1930.3  | Detected   | 3170.8  | Detected   | Hnrnpa3       | 0.777423626 | 0.47327514 | 0.86127937 | 0.5243243 |
| A_52_P6610 | 29.2     | Detected   | 29.4    | Detected   | 23.8    | Detected   | 22.7    | Not Detect | Ccr3          | 0.77739726  | 0.81506849 | 0.77210884 | 0.8095238 |
| A_55_P2015 | 45.8     | Detected   | 40.6    | Detected   | 39.9    | Detected   | 35.6    | Not Detect | Cpa5          | 0.777292576 | 0.87117904 | 0.87684729 | 0.9827586 |
| A_55_P1985 | 604.5    | Detected   | 671     | Detected   | 409.1   | Detected   | 469.8   | Detected   | Fam195b       | 0.777171216 | 0.67675765 | 0.70014903 | 0.609687  |
| A_55_P2235 | 17.5     | Detected   | 18      | Detected   | 18.8    | Detected   | 13.6    | Not Detect | 4930519E07Rik | 0.777142857 | 1.07428571 | 0.75555556 | 1.0444444 |
| A_55_P2184 | 125.6    | Detected   | 112.3   | Detected   | 98.1    | Detected   | 97.6    | Detected   | Rbm19         | 0.777070064 | 0.78105096 | 0.86910062 | 0.8735553 |
| A_51_P3073 | 39296    | Detected   | 30995.9 | Detected   | 30310.7 | Detected   | 30534.1 | Detected   | Rbbp4         | 0.777028196 | 0.77134314 | 0.98510126 | 0.9778939 |
| A_55_P1980 | 2939.2   | Detected   | 2553.2  | Detected   | 2055.9  | Detected   | 2283.7  | Detected   | Oscp1         | 0.776980131 | 0.69947605 | 0.89444619 | 0.8052248 |

|            |         |            |         |            |         |            |         |            |               |             |            |            |           |
|------------|---------|------------|---------|------------|---------|------------|---------|------------|---------------|-------------|------------|------------|-----------|
| A_55_P2006 | 26      | Detected   | 31.8    | Detected   | 34.8    | Detected   | 20.2    | Not Detect | Gm11711       | 0.776923077 | 1.33846154 | 0.63522013 | 1.0943396 |
| A_52_P5326 | 375.2   | Detected   | 287     | Detected   | 350.2   | Detected   | 291.5   | Detected   | Ermard        | 0.776918977 | 0.93336887 | 1.01567944 | 1.2202091 |
| A_51_P4444 | 3275.9  | Detected   | 2736    | Detected   | 2346.4  | Detected   | 2545.1  | Detected   | Ptgr1         | 0.776916267 | 0.71626118 | 0.93022661 | 0.8576023 |
| A_55_P2022 | 280.5   | Detected   | 214     | Detected   | 368.2   | Detected   | 217.9   | Detected   | Tspan9        | 0.776827094 | 1.31265597 | 1.0182243  | 1.7205607 |
| A_52_P2052 | 72.1    | Detected   | 81.9    | Detected   | 42.5    | Detected   | 56      | Detected   | Adam11        | 0.776699029 | 0.58945908 | 0.68376068 | 0.5189255 |
| A_52_P8922 | 1535.2  | Detected   | 1325.4  | Detected   | 1048.6  | Detected   | 1192.3  | Detected   | Sntb2         | 0.77664148  | 0.68303804 | 0.89957749 | 0.7911574 |
| A_55_P2036 | 10583.9 | Detected   | 10502.5 | Detected   | 10284.9 | Detected   | 8218.3  | Detected   | Ddx52         | 0.776490708 | 0.97174954 | 0.78250893 | 0.9792811 |
| A_55_P2022 | 26061.9 | Detected   | 22375.6 | Detected   | 25508.1 | Detected   | 20234.6 | Detected   | Nsa2          | 0.776405404 | 0.97875059 | 0.90431542 | 1.1399962 |
| A_65_P1521 | 29859.6 | Detected   | 22852.4 | Detected   | 23341.9 | Detected   | 23182.5 | Detected   | Mrpl15        | 0.776383475 | 0.78172179 | 1.01444487 | 1.0214201 |
| A_55_P1984 | 20001.4 | Detected   | 16916   | Detected   | 14298.9 | Detected   | 15528   | Detected   | Sgpl1         | 0.776345656 | 0.71489496 | 0.91794751 | 0.8452885 |
| A_55_P2387 | 28.6    | Detected   | 31.4    | Detected   | 15.7    | Not Detect | 22.2    | Not Detect | 4921532D01Rik | 0.776223776 | 0.54895105 | 0.70700637 | 0.5       |
| A_51_P2700 | 13.4    | Not Detect | 14.8    | Not Detect | 19.5    | Detected   | 10.4    | Not Detect | Lrguk         | 0.776119403 | 1.45522388 | 0.7027027  | 1.3175676 |
| A_55_P2068 | 345.5   | Detected   | 260.8   | Detected   | 269.7   | Detected   | 268.1   | Detected   | 2410018L13Rik | 0.775976845 | 0.78060781 | 1.0279908  | 1.0341258 |
| A_55_P2415 | 3240.5  | Detected   | 2552.4  | Detected   | 2036.3  | Detected   | 2514.5  | Detected   | Mta1          | 0.7759605   | 0.62839068 | 0.98515123 | 0.7977982 |
| A_55_P2108 | 9124.1  | Detected   | 7505    | Detected   | 7148.8  | Detected   | 7079.8  | Detected   | Med10         | 0.775945025 | 0.78350741 | 0.94334444 | 0.9525383 |
| A_51_P4248 | 6771.3  | Detected   | 5496.6  | Detected   | 4670.1  | Detected   | 5253.7  | Detected   | Ncapg2        | 0.775877601 | 0.68969031 | 0.95580905 | 0.8496343 |
| A_55_P1969 | 36272.5 | Detected   | 33790.9 | Detected   | 30964.8 | Detected   | 28142.8 | Detected   | Lrpprc        | 0.775871528 | 0.85367151 | 0.83285145 | 0.9163651 |
| A_51_P5000 | 10.7    | Not Detect | 34.2    | Detected   | 3       | Not Detect | 8.3     | Not Detect | Gm14446       | 0.775700935 | 0.28037383 | 0.24269006 | 0.0877193 |
| A_51_P2434 | 53.5    | Detected   | 35.5    | Detected   | 33.3    | Detected   | 41.5    | Not Detect | 4931431F19Rik | 0.775700935 | 0.62242991 | 1.16901408 | 0.9380282 |
| A_52_P3972 | 1836.5  | Detected   | 1127.2  | Detected   | 1797.3  | Detected   | 1424.5  | Detected   | Csk           | 0.775660223 | 0.97865505 | 1.26375089 | 1.5944819 |
| A_55_P2039 | 15.6    | Detected   | 10.2    | Not Detect | 16.5    | Not Detect | 12.1    | Not Detect | D930007P13Rik | 0.775641026 | 1.05769231 | 1.18627451 | 1.6176471 |
| A_51_P4546 | 9495.8  | Detected   | 8206.4  | Detected   | 8529.1  | Detected   | 7365.3  | Detected   | Arl6ip4       | 0.77563765  | 0.8981971  | 0.89750682 | 1.039323  |
| A_55_P2039 | 10465.9 | Detected   | 10302.1 | Detected   | 9622.6  | Detected   | 8117.3  | Detected   | Phf10         | 0.775595028 | 0.91942403 | 0.78792673 | 0.9340426 |
| A_55_P2045 | 36365.3 | Detected   | 30804.6 | Detected   | 29607.2 | Detected   | 28203.9 | Detected   | Ehmt1         | 0.775571768 | 0.81416075 | 0.9155743  | 0.9611292 |
| A_55_P2307 | 113.6   | Detected   | 84.3    | Detected   | 68      | Detected   | 88.1    | Detected   | E030004H24Rik | 0.775528169 | 0.59859155 | 1.04507711 | 0.8066429 |
| A_55_P2073 | 37.4    | Detected   | 54.4    | Detected   | 31      | Detected   | 29      | Not Detect | Cenpp         | 0.77540107  | 0.82887701 | 0.53308824 | 0.5698529 |
| A_55_P2010 | 2769.2  | Detected   | 2190.9  | Detected   | 2506.6  | Detected   | 2147    | Detected   | Rbm45         | 0.77531417  | 0.90517117 | 0.97996257 | 1.144096  |
| A_51_P2109 | 89.9    | Detected   | 49.3    | Detected   | 73.3    | Detected   | 69.7    | Detected   | A530054K11Rik | 0.775305895 | 0.81535039 | 1.4137931  | 1.4868154 |
| A_55_P2004 | 2916.8  | Detected   | 1536    | Detected   | 3309    | Detected   | 2261.3  | Detected   | Ube2h         | 0.775267416 | 1.13446242 | 1.47220052 | 2.1542969 |
| A_55_P2143 | 3855.6  | Detected   | 3334.2  | Detected   | 2615.9  | Detected   | 2989.1  | Detected   | Rest          | 0.775261957 | 0.67846768 | 0.89649691 | 0.784566  |
| A_55_P2068 | 2932.2  | Detected   | 1924.4  | Detected   | 3129.8  | Detected   | 2273    | Detected   | Ncbp2         | 0.775185867 | 1.06738967 | 1.18114737 | 1.6263771 |
| A_55_P2011 | 63846.6 | Detected   | 55880.1 | Detected   | 52051.7 | Detected   | 49492.4 | Detected   | Neur11b       | 0.775176752 | 0.81526189 | 0.88568918 | 0.931489  |
| A_52_P3368 | 5219.8  | Detected   | 4736.5  | Detected   | 5667.4  | Detected   | 4046.1  | Detected   | Matr3         | 0.775144642 | 1.08575041 | 0.85423836 | 1.1965375 |
| A_55_P2454 | 691.1   | Detected   | 362.7   | Detected   | 620.2   | Detected   | 535.7   | Detected   | Ifnar1        | 0.775141079 | 0.89740993 | 1.47697822 | 1.7099531 |
| A_55_P1973 | 1703.8  | Detected   | 1520.5  | Detected   | 1095.8  | Detected   | 1320.5  | Detected   | Tex9          | 0.775032281 | 0.6431506  | 0.86846432 | 0.720684  |
| A_51_P2621 | 6663.6  | Detected   | 6103.8  | Detected   | 4822.6  | Detected   | 5164    | Detected   | Irgm1         | 0.77495648  | 0.72372291 | 0.84603034 | 0.790098  |
| A_55_P2217 | 55.1    | Detected   | 69.3    | Detected   | 65.7    | Detected   | 42.7    | Not Detect | 4921515G04Rik | 0.774954628 | 1.1923775  | 0.61616162 | 0.9480519 |
| A_55_P1962 | 3560    | Detected   | 2908.6  | Detected   | 3636.3  | Detected   | 2758.7  | Detected   | Gm4943        | 0.77491573  | 1.02143258 | 0.94846318 | 1.2501891 |
| A_55_P2114 | 116.4   | Detected   | 77.3    | Detected   | 100.5   | Detected   | 90.2    | Detected   | Rsph3a        | 0.774914089 | 0.86340206 | 1.16688228 | 1.3001294 |
| A_66_P1020 | 3426.9  | Detected   | 3022.5  | Detected   | 2571.7  | Detected   | 2655.3  | Detected   | Cep68         | 0.774840235 | 0.75044501 | 0.87851117 | 0.8508519 |

|            |         |            |         |            |         |            |         |            |               |             |            |            |           |
|------------|---------|------------|---------|------------|---------|------------|---------|------------|---------------|-------------|------------|------------|-----------|
| A_52_P2372 | 67.5    | Detected   | 37.3    | Detected   | 44.1    | Detected   | 52.3    | Detected   | Thpo          | 0.774814815 | 0.65333333 | 1.40214477 | 1.1823056 |
| A_55_P2009 | 56134.3 | Detected   | 44308.1 | Detected   | 50785   | Detected   | 43488.7 | Detected   | Sfr1          | 0.77472597  | 0.90470532 | 0.98150677 | 1.1461787 |
| A_55_P2136 | 15199.9 | Detected   | 13585   | Detected   | 10867.4 | Detected   | 11775.4 | Detected   | Midn          | 0.774702465 | 0.71496523 | 0.86679426 | 0.7999558 |
| A_52_P3153 | 2691.2  | Detected   | 2649.7  | Detected   | 1917.7  | Detected   | 2084.7  | Detected   | Lats2         | 0.77463585  | 0.71258175 | 0.78676831 | 0.7237423 |
| A_55_P2289 | 9314    | Detected   | 8311.2  | Detected   | 8258.9  | Detected   | 7214.5  | Detected   | Fryl          | 0.774586644 | 0.88671892 | 0.86804553 | 0.9937073 |
| A_66_P1315 | 3340.6  | Detected   | 2926    | Detected   | 3052.5  | Detected   | 2587.5  | Detected   | Rpp30         | 0.774561456 | 0.91375801 | 0.88431306 | 1.0432331 |
| A_55_P1999 | 4036    | Detected   | 3086.3  | Detected   | 3020.6  | Detected   | 3126.1  | Detected   | Clasp1        | 0.774554014 | 0.74841427 | 1.0128957  | 0.9787124 |
| A_51_P4002 | 200     | Detected   | 111.3   | Detected   | 131.8   | Detected   | 154.9   | Detected   | Vpreb1        | 0.7745      | 0.659      | 1.39173405 | 1.1841869 |
| A_55_P2293 | 13.3    | Not Detect | 3.9     | Not Detect | 64.7    | Detected   | 10.3    | Not Detect | Ces2a         | 0.77443609  | 4.86466165 | 2.64102564 | 16.589744 |
| A_51_P3388 | 13.3    | Not Detect | 38.5    | Detected   | 13.9    | Not Detect | 10.3    | Not Detect | P2ry12        | 0.77443609  | 1.04511278 | 0.26753247 | 0.361039  |
| A_55_P2162 | 13.3    | Not Detect | 257.8   | Detected   | 3.7     | Not Detect | 10.3    | Not Detect | Ntn1          | 0.77443609  | 0.27819549 | 0.03995345 | 0.0143522 |
| A_55_P2027 | 18.6    | Detected   | 13.2    | Not Detect | 16.3    | Not Detect | 14.4    | Not Detect | Olf329-ps     | 0.774193548 | 0.87634409 | 1.09090909 | 1.2348485 |
| A_55_P2005 | 10959.7 | Detected   | 7709    | Detected   | 10663.4 | Detected   | 8484.8  | Detected   | Manbal        | 0.774181775 | 0.97296459 | 1.10063562 | 1.3832404 |
| A_52_P1805 | 8143.7  | Detected   | 5958.9  | Detected   | 6891    | Detected   | 6304.6  | Detected   | 2310061104Rik | 0.77416899  | 0.84617557 | 1.05801406 | 1.1564215 |
| A_55_P2180 | 6165.7  | Detected   | 5774.3  | Detected   | 5636.5  | Detected   | 4772.6  | Detected   | Cdkn2aipnl    | 0.774056474 | 0.91417033 | 0.82652443 | 0.9761356 |
| A_55_P2009 | 201.8   | Detected   | 146.2   | Detected   | 125.2   | Detected   | 156.2   | Detected   | Ccdc88a       | 0.774033697 | 0.62041625 | 1.06839945 | 0.8563611 |
| A_51_P4159 | 10675.7 | Detected   | 8290.5  | Detected   | 6941    | Detected   | 8263.3  | Detected   | Pola1         | 0.774028869 | 0.65016814 | 0.99671914 | 0.8372233 |
| A_51_P3519 | 4054.5  | Detected   | 3409.5  | Detected   | 3598.8  | Detected   | 3138.1  | Detected   | Hells         | 0.773979529 | 0.88760636 | 0.92039889 | 1.0555213 |
| A_55_P2032 | 441.1   | Detected   | 210.5   | Detected   | 308.9   | Detected   | 341.4   | Detected   | 4930522L14Rik | 0.773974156 | 0.70029472 | 1.62185273 | 1.4674584 |
| A_52_P3621 | 2052.5  | Detected   | 1239.7  | Detected   | 1724.1  | Detected   | 1588.4  | Detected   | Upf2          | 0.773885505 | 0.84       | 1.28127773 | 1.3907397 |
| A_52_P6813 | 35039.7 | Detected   | 25111   | Detected   | 30447.1 | Detected   | 27113.8 | Detected   | Plaur         | 0.773802287 | 0.86893153 | 1.07975788 | 1.2125005 |
| A_55_P2062 | 23686.2 | Detected   | 20644.1 | Detected   | 26603.3 | Detected   | 18323.4 | Detected   | Memo1         | 0.773589685 | 1.1231561  | 0.88758531 | 1.2886636 |
| A_66_P1371 | 44115.1 | Detected   | 38741.7 | Detected   | 40795.8 | Detected   | 34126.7 | Detected   | Arl6ip4       | 0.773583195 | 0.92475819 | 0.88087771 | 1.0530204 |
| A_52_P3137 | 212.4   | Detected   | 165     | Detected   | 143.5   | Detected   | 164.3   | Detected   | Rad54b        | 0.77354049  | 0.67561205 | 0.99575758 | 0.869697  |
| A_51_P3756 | 96.7    | Detected   | 85.1    | Detected   | 98.7    | Detected   | 74.8    | Detected   | Tcea2         | 0.77352637  | 1.02068252 | 0.87896592 | 1.159812  |
| A_55_P1966 | 5199.4  | Detected   | 5853.1  | Detected   | 4031.3  | Detected   | 4021.8  | Detected   | Epn2          | 0.773512328 | 0.77533946 | 0.68712306 | 0.6887461 |
| A_55_P2177 | 20.3    | Detected   | 18.7    | Detected   | 22.6    | Detected   | 15.7    | Not Detect | Ptch2         | 0.773399015 | 1.11330049 | 0.83957219 | 1.2085561 |
| A_51_P4614 | 18128.5 | Detected   | 12992.6 | Detected   | 13423.1 | Detected   | 14019.4 | Detected   | Ube2r2        | 0.773334804 | 0.74044185 | 1.0790296  | 1.0331342 |
| A_55_P2125 | 7650.8  | Detected   | 7233    | Detected   | 6408.9  | Detected   | 5916.4  | Detected   | Sema6d        | 0.773304752 | 0.83767711 | 0.81797318 | 0.8860639 |
| A_55_P1999 | 661.1   | Detected   | 370.7   | Detected   | 381.6   | Detected   | 511.2   | Detected   | Cit           | 0.773256693 | 0.57721979 | 1.37901268 | 1.0294038 |
| A_55_P2281 | 608.5   | Detected   | 496.3   | Detected   | 254.1   | Detected   | 470.5   | Detected   | 2610034E01Rik | 0.773212818 | 0.41758422 | 0.94801531 | 0.5119887 |
| A_55_P2051 | 1052.8  | Detected   | 1057.2  | Detected   | 667.6   | Detected   | 814     | Detected   | Brsk1         | 0.773176292 | 0.63411854 | 0.76995838 | 0.6314794 |
| A_51_P1579 | 247.3   | Detected   | 166.3   | Detected   | 126.8   | Detected   | 191.2   | Detected   | Soga3         | 0.77315002  | 0.51273757 | 1.1497294  | 0.7624775 |
| A_55_P2147 | 356.1   | Detected   | 243.4   | Detected   | 293.9   | Detected   | 275.3   | Detected   | Ctdspl2       | 0.773097445 | 0.82532996 | 1.13105998 | 1.2074774 |
| A_51_P3655 | 7803.7  | Detected   | 6475.2  | Detected   | 6740    | Detected   | 6031.7  | Detected   | Ppp2r1a       | 0.772928226 | 0.86369286 | 0.93150791 | 1.0408945 |
| A_55_P1960 | 7564.1  | Detected   | 6270.6  | Detected   | 6271.3  | Detected   | 5845.5  | Detected   | Lrrc59        | 0.772795177 | 0.8290874  | 0.93220744 | 1.0001116 |
| A_55_P2113 | 19915.2 | Detected   | 15043   | Detected   | 17732.4 | Detected   | 15387.5 | Detected   | Bzw1          | 0.77265104  | 0.89039528 | 1.02290102 | 1.1787808 |
| A_66_P1155 | 412.9   | Detected   | 491.3   | Detected   | 534.4   | Detected   | 319     | Detected   | 1700038P13Rik | 0.772584161 | 1.29426011 | 0.64929778 | 1.0877264 |
| A_55_P2127 | 80973.7 | Detected   | 62796.4 | Detected   | 85500.1 | Detected   | 62549.9 | Detected   | Hist1h3d      | 0.772471803 | 1.05589963 | 0.99607462 | 1.3615446 |
| A_55_P2128 | 316.4   | Detected   | 231.1   | Detected   | 284.7   | Detected   | 244.4   | Detected   | Phf21a        | 0.772439949 | 0.89981037 | 1.05755084 | 1.2319342 |

|            |         |          |         |          |         |          |         |            |               |             |            |            |           |
|------------|---------|----------|---------|----------|---------|----------|---------|------------|---------------|-------------|------------|------------|-----------|
| A_52_P2132 | 185.4   | Detected | 95.8    | Detected | 141.3   | Detected | 143.2   | Detected   | Arhgap19      | 0.772384035 | 0.76213592 | 1.49478079 | 1.4749478 |
| A_52_P8586 | 81332.4 | Detected | 58016.9 | Detected | 88335.9 | Detected | 62814.8 | Detected   | Eif6          | 0.772321977 | 1.08610959 | 1.08269832 | 1.5225891 |
| A_55_P2132 | 2444.3  | Detected | 1536.7  | Detected | 2182    | Detected | 1887.7  | Detected   | Adal          | 0.772286544 | 0.89268911 | 1.22841153 | 1.4199258 |
| A_55_P2056 | 49111.1 | Detected | 40208.2 | Detected | 47889.7 | Detected | 37926.8 | Detected   | Traf7         | 0.772265333 | 0.97512986 | 0.94326033 | 1.1910431 |
| A_55_P2059 | 3705.2  | Detected | 2934.8  | Detected | 2780.2  | Detected | 2861.3  | Detected   | Myo7a         | 0.772239015 | 0.75035086 | 0.9749557  | 0.9473218 |
| A_52_P4023 | 3869.6  | Detected | 3417.7  | Detected | 3949.2  | Detected | 2987.9  | Detected   | Med20         | 0.772146992 | 1.0205706  | 0.87424291 | 1.1555139 |
| A_55_P1970 | 319.3   | Detected | 292.6   | Detected | 468.5   | Detected | 246.5   | Detected   | Mttp          | 0.772001253 | 1.46727216 | 0.84244703 | 1.601162  |
| A_51_P1012 | 1145.2  | Detected | 913.8   | Detected | 1038.8  | Detected | 884     | Detected   | Gmeb2         | 0.771917569 | 0.90709046 | 0.96738893 | 1.1367914 |
| A_52_P6063 | 22356.1 | Detected | 20826.1 | Detected | 24649.4 | Detected | 17257   | Detected   | Mrpl3         | 0.7719146   | 1.1025805  | 0.8286237  | 1.1835821 |
| A_65_P0756 | 6472.8  | Detected | 4406.4  | Detected | 5981.8  | Detected | 4996    | Detected   | Tpd52l2       | 0.77184526  | 0.92414411 | 1.13380537 | 1.3575254 |
| A_55_P2082 | 7833.6  | Detected | 5866.9  | Detected | 5130.2  | Detected | 6046.1  | Detected   | Fnbp1l        | 0.771816279 | 0.65489685 | 1.03054424 | 0.8744311 |
| A_66_P1220 | 23708.8 | Detected | 7693.7  | Detected | 3150.4  | Detected | 18298.5 | Detected   | 9030619P08Rik | 0.771802031 | 0.13287893 | 2.37837451 | 0.4094779 |
| A_55_P2059 | 2466.6  | Detected | 2515.8  | Detected | 2387.3  | Detected | 1903.7  | Detected   | Tagap         | 0.771791129 | 0.96785048 | 0.75669767 | 0.9489228 |
| A_52_P6761 | 1428    | Detected | 616.1   | Detected | 1392.2  | Detected | 1102.1  | Detected   | Fam210b       | 0.771778711 | 0.97492997 | 1.78883298 | 2.2596981 |
| A_51_P3636 | 42735.5 | Detected | 36528   | Detected | 45562.2 | Detected | 32979.5 | Detected   | Snrpe         | 0.771712043 | 1.06614407 | 0.90285534 | 1.2473226 |
| A_55_P1961 | 974.5   | Detected | 673.1   | Detected | 1050.8  | Detected | 752     | Detected   | Zfand3        | 0.771677783 | 1.07829656 | 1.11721884 | 1.561135  |
| A_55_P2045 | 32909   | Detected | 23304.7 | Detected | 27058   | Detected | 25393.5 | Detected   | Ppp4r1        | 0.771627822 | 0.82220669 | 1.08962999 | 1.1610533 |
| A_51_P1550 | 3919.5  | Detected | 3326.5  | Detected | 4028.5  | Detected | 3023.9  | Detected   | Nudt14        | 0.771501467 | 1.02780967 | 0.90903352 | 1.2110326 |
| A_51_P3563 | 170.6   | Detected | 127.6   | Detected | 66.7    | Detected | 131.6   | Detected   | Tcp11l1       | 0.771395076 | 0.39097304 | 1.03134796 | 0.5227273 |
| A_52_P6800 | 2461.7  | Detected | 1347.9  | Detected | 1696.6  | Detected | 1898.9  | Detected   | Cdk16         | 0.771377503 | 0.68919852 | 1.40878403 | 1.2586987 |
| A_55_P2130 | 234     | Detected | 508.3   | Detected | 183.6   | Detected | 180.5   | Detected   | Zxdc          | 0.771367521 | 0.78461538 | 0.35510525 | 0.361204  |
| A_66_P1285 | 37.6    | Detected | 37.8    | Detected | 35.4    | Detected | 29      | Not Detect | Dido1         | 0.771276596 | 0.94148936 | 0.76719577 | 0.9365079 |
| A_55_P2018 | 3535.5  | Detected | 2905.1  | Detected | 2826.6  | Detected | 2726.7  | Detected   | Zfp644        | 0.77123462  | 0.79949088 | 0.93859075 | 0.9729786 |
| A_52_P6412 | 14398.9 | Detected | 8177.4  | Detected | 9287.5  | Detected | 11104.6 | Detected   | Galk2         | 0.77121169  | 0.64501455 | 1.35796219 | 1.1357522 |
| A_52_P1294 | 223.3   | Detected | 271     | Detected | 157.2   | Detected | 172.2   | Detected   | Wdpcp         | 0.771159875 | 0.70398567 | 0.63542435 | 0.5800738 |
| A_51_P4839 | 3227.4  | Detected | 2385    | Detected | 2353.6  | Detected | 2488.5  | Detected   | Tm9sf4        | 0.771054099 | 0.72925575 | 1.04339623 | 0.9868344 |
| A_55_P1971 | 34.5    | Detected | 31.4    | Detected | 30.5    | Detected | 26.6    | Not Detect | Nlrp12        | 0.771014493 | 0.88405797 | 0.84713376 | 0.9713376 |
| A_51_P2198 | 1751.7  | Detected | 1757.8  | Detected | 1391.6  | Detected | 1350.4  | Detected   | Alg13         | 0.770908261 | 0.79442827 | 0.76823302 | 0.7916714 |
| A_51_P5170 | 1721.9  | Detected | 1473.5  | Detected | 1255    | Detected | 1327.3  | Detected   | Casp8ap2      | 0.770834543 | 0.72884604 | 0.90078045 | 0.8517136 |
| A_51_P4642 | 48059.3 | Detected | 42432   | Detected | 58241.9 | Detected | 37041.3 | Detected   | Fkbp2         | 0.770741563 | 1.21187575 | 0.87295673 | 1.3725938 |
| A_55_P1979 | 6562.2  | Detected | 4636.5  | Detected | 4201.7  | Detected | 5057.7  | Detected   | Shroom2       | 0.770732376 | 0.64028832 | 1.09084439 | 0.9062224 |
| A_51_P3044 | 20.5    | Detected | 25.2    | Detected | 18.4    | Detected | 15.8    | Not Detect | Olfr12        | 0.770731707 | 0.89756098 | 0.62698413 | 0.7301587 |
| A_55_P2083 | 17490.2 | Detected | 14342.9 | Detected | 13696.6 | Detected | 13478.7 | Detected   | Zzz3          | 0.770642989 | 0.78310139 | 0.93974719 | 0.9549394 |
| A_55_P2026 | 9058.7  | Detected | 8083    | Detected | 8375.8  | Detected | 6980.7  | Detected   | Usp30         | 0.770607262 | 0.92461391 | 0.86362737 | 1.0362242 |
| A_52_P6159 | 3267.3  | Detected | 2855.8  | Detected | 2880.1  | Detected | 2517.4  | Detected   | Qk            | 0.770483274 | 0.88149236 | 0.88150431 | 1.008509  |
| A_51_P2893 | 172.5   | Detected | 394.1   | Detected | 18.8    | Detected | 132.9   | Detected   | Naip1         | 0.770434783 | 0.10898551 | 0.33722405 | 0.0477036 |
| A_52_P9719 | 9146.3  | Detected | 6357.2  | Detected | 8272.7  | Detected | 7046.6  | Detected   | Ergic1        | 0.770431759 | 0.90448597 | 1.10844397 | 1.3013119 |
| A_51_P3339 | 2517.4  | Detected | 2130.4  | Detected | 2095.8  | Detected | 1939.2  | Detected   | Ints7         | 0.770318583 | 0.83252562 | 0.9102516  | 0.9837589 |
| A_55_P2072 | 60719.5 | Detected | 56337.4 | Detected | 53614.2 | Detected | 46770   | Detected   | Suv39h2       | 0.77026326  | 0.88298158 | 0.83017676 | 0.9516627 |
| A_55_P2040 | 307.3   | Detected | 220.4   | Detected | 170.9   | Detected | 236.7   | Detected   | Qser1         | 0.770257078 | 0.55613407 | 1.07395644 | 0.7754083 |

|            |          |            |          |          |         |            |          |            |               |             |            |            |           |
|------------|----------|------------|----------|----------|---------|------------|----------|------------|---------------|-------------|------------|------------|-----------|
| A_55_P2052 | 8854.7   | Detected   | 5840.9   | Detected | 5801    | Detected   | 6820.2   | Detected   | Cask          | 0.770235016 | 0.6551323  | 1.16766252 | 0.9931689 |
| A_55_P1989 | 7917.2   | Detected   | 7308.4   | Detected | 3895.1  | Detected   | 6097.4   | Detected   | Prkd3         | 0.770146011 | 0.49197949 | 0.83430026 | 0.5329621 |
| A_55_P2133 | 46935.7  | Detected   | 46722.7  | Detected | 51773   | Detected   | 36147.3  | Detected   | Txn14a        | 0.770145113 | 1.10306227 | 0.77365606 | 1.1080909 |
| A_55_P2099 | 17158.1  | Detected   | 11531.6  | Detected | 10111.3 | Detected   | 13213.1  | Detected   | Tfe3          | 0.770079438 | 0.58930185 | 1.14581671 | 0.8768341 |
| A_55_P1969 | 25147.3  | Detected   | 16811.2  | Detected | 19163.8 | Detected   | 19365    | Detected   | Pin4          | 0.77006279  | 0.76206193 | 1.15191063 | 1.1399424 |
| A_55_P2327 | 553.6    | Detected   | 547.6    | Detected | 403     | Detected   | 426.3    | Detected   | Mtx3          | 0.770050578 | 0.72796243 | 0.77848795 | 0.7359386 |
| A_55_P2209 | 10979.1  | Detected   | 10005    | Detected | 9139.6  | Detected   | 8454.4   | Detected   | 9530083O12Rik | 0.770044903 | 0.83245439 | 0.84501749 | 0.9135032 |
| A_51_P4984 | 8171.2   | Detected   | 5310.4   | Detected | 7322.9  | Detected   | 6292.1   | Detected   | Cnpy3         | 0.770033777 | 0.89618416 | 1.18486366 | 1.3789733 |
| A_52_P2151 | 740.5    | Detected   | 470      | Detected | 389     | Detected   | 570.2    | Detected   | Opn3          | 0.770020257 | 0.52532073 | 1.21319149 | 0.8276596 |
| A_55_P2174 | 27675.5  | Detected   | 18595.4  | Detected | 21103.4 | Detected   | 21309.8  | Detected   | Pin4          | 0.769987895 | 0.76253004 | 1.14597158 | 1.1348721 |
| A_51_P1011 | 5443.5   | Detected   | 2973.5   | Detected | 4191.1  | Detected   | 4191.3   | Detected   | Samd14        | 0.769964177 | 0.76992744 | 1.40955103 | 1.4094838 |
| A_52_P8933 | 454.7    | Detected   | 455.1    | Detected | 550     | Detected   | 350.1    | Detected   | Tmie          | 0.769958214 | 1.20958874 | 0.76928148 | 1.2085256 |
| A_55_P2123 | 120.4    | Detected   | 464.6    | Detected | 130.4   | Detected   | 92.7     | Detected   | Gm11627       | 0.769933555 | 1.08305648 | 0.19952647 | 0.2806715 |
| A_55_P2117 | 79.1     | Detected   | 68.2     | Detected | 70.5    | Detected   | 60.9     | Detected   | Zfp395        | 0.769911504 | 0.89127686 | 0.89296188 | 1.0337243 |
| A_51_P2717 | 11.3     | Not Detect | 19.8     | Detected | 14.2    | Not Detect | 8.7      | Not Detect | Gm568         | 0.769911504 | 1.25663717 | 0.43939394 | 0.7171717 |
| A_52_P4579 | 1135.6   | Detected   | 1469.1   | Detected | 1191.6  | Detected   | 874.3    | Detected   | Trmt10a       | 0.769901374 | 1.04931314 | 0.59512627 | 0.8111088 |
| A_52_P5037 | 679.1    | Detected   | 461.5    | Detected | 606     | Detected   | 522.8    | Detected   | Fchsd2        | 0.769842439 | 0.89235753 | 1.13282774 | 1.3131094 |
| A_51_P3635 | 2781.5   | Detected   | 2497     | Detected | 2628.6  | Detected   | 2141.3   | Detected   | Abi2          | 0.769836419 | 0.94502966 | 0.85754906 | 1.0527032 |
| A_55_P2060 | 54.7     | Detected   | 42.8     | Detected | 35      | Detected   | 42.1     | Not Detect | Gm3238        | 0.769652651 | 0.63985375 | 0.98364486 | 0.817757  |
| A_55_P2108 | 719.3    | Detected   | 443.3    | Detected | 515.8   | Detected   | 553.6    | Detected   | Fert2         | 0.769637147 | 0.71708606 | 1.2488157  | 1.1635461 |
| A_55_P1995 | 1172.1   | Detected   | 699.5    | Detected | 995.3   | Detected   | 901.9    | Detected   | Gm14305       | 0.769473594 | 0.84915963 | 1.28934954 | 1.4228735 |
| A_55_P2296 | 87.6     | Detected   | 52.6     | Detected | 53.2    | Detected   | 67.4     | Detected   | A330050B17Rik | 0.769406393 | 0.60730594 | 1.28136882 | 1.0114068 |
| A_55_P1981 | 1310.8   | Detected   | 1129.5   | Detected | 856.2   | Detected   | 1008.5   | Detected   | Irgm1         | 0.769377479 | 0.65318889 | 0.89287295 | 0.7580345 |
| A_55_P2026 | 23574.6  | Detected   | 19751.5  | Detected | 19310.4 | Detected   | 18136.9  | Detected   | Med10         | 0.769340731 | 0.81911888 | 0.91825431 | 0.9776675 |
| A_55_P2016 | 4311.5   | Detected   | 1758.3   | Detected | 2892.6  | Detected   | 3316.6   | Detected   | Cry2          | 0.769245042 | 0.6709034  | 1.88625377 | 1.6451118 |
| A_66_P1172 | 53.3     | Detected   | 33       | Detected | 51.6    | Detected   | 41       | Not Detect | 4933436H12Rik | 0.769230769 | 0.96810507 | 1.24242424 | 1.5636364 |
| A_55_P2054 | 96.6     | Detected   | 102.6    | Detected | 94.1    | Detected   | 74.3     | Detected   | Isg2012       | 0.769151139 | 0.97412008 | 0.72417154 | 0.917154  |
| A_52_P6183 | 158.5    | Detected   | 66.1     | Detected | 101.7   | Detected   | 121.9    | Detected   | Slc35a5       | 0.769085174 | 0.64164038 | 1.84417549 | 1.5385779 |
| A_51_P1095 | 832.2    | Detected   | 665.9    | Detected | 873.8   | Detected   | 640      | Detected   | E130308A19Rik | 0.769045902 | 1.04998798 | 0.96110527 | 1.312209  |
| A_51_P3705 | 3742.7   | Detected   | 2795.4   | Detected | 2656.6  | Detected   | 2878.2   | Detected   | Dcakd         | 0.76901702  | 0.70980843 | 1.02962009 | 0.950347  |
| A_52_P4930 | 3281.1   | Detected   | 2168.6   | Detected | 2182.6  | Detected   | 2523.2   | Detected   | Fmr1          | 0.769010393 | 0.66520374 | 1.16351563 | 1.0064558 |
| A_52_P7887 | 167      | Detected   | 163.1    | Detected | 135.4   | Detected   | 128.4    | Detected   | Phf12         | 0.768862275 | 0.81077844 | 0.78724709 | 0.8301655 |
| A_55_P2111 | 3750.5   | Detected   | 3208.9   | Detected | 1394.1  | Detected   | 2883.6   | Detected   | Gem           | 0.768857486 | 0.37171044 | 0.8986257  | 0.4344479 |
| A_55_P1985 | 80.9     | Detected   | 55.9     | Detected | 75.3    | Detected   | 62.2     | Detected   | Zbtb37        | 0.768850433 | 0.93077874 | 1.11270125 | 1.3470483 |
| A_55_P2000 | 526.9    | Detected   | 653      | Detected | 608.3   | Detected   | 405.1    | Detected   | Pik3r3        | 0.768836591 | 1.15448852 | 0.62036753 | 0.9315467 |
| A_51_P4479 | 123.7    | Detected   | 134.7    | Detected | 45      | Detected   | 95.1     | Detected   | Fam46c        | 0.768795473 | 0.36378335 | 0.70601336 | 0.3340757 |
| A_55_P2064 | 328698.8 | Detected   | 132567.1 | Detected | 58443.9 | Detected   | 252680.5 | Detected   | Ly6c1         | 0.768729609 | 0.17780381 | 1.90605739 | 0.4408628 |
| A_51_P1057 | 18042.4  | Detected   | 14215.2  | Detected | 16440.7 | Detected   | 13869.5  | Detected   | Trip13        | 0.768717022 | 0.91122578 | 0.97568096 | 1.1565578 |
| A_51_P3432 | 59341.4  | Detected   | 37166.3  | Detected | 53634.6 | Detected   | 45612.9  | Detected   | Cd151         | 0.768652239 | 0.90383105 | 1.22726502 | 1.4430976 |
| A_52_P6084 | 2887     | Detected   | 2114.1   | Detected | 3514.9  | Detected   | 2218.9   | Detected   | Aars2         | 0.768583304 | 1.21749221 | 1.04957192 | 1.6625987 |

|            |          |            |          |            |         |            |         |            |               |             |            |            |           |
|------------|----------|------------|----------|------------|---------|------------|---------|------------|---------------|-------------|------------|------------|-----------|
| A_55_P2058 | 31.1     | Detected   | 46.2     | Detected   | 30.6    | Detected   | 23.9    | Not Detect | LOC101056056  | 0.768488746 | 0.98392283 | 0.51731602 | 0.6623377 |
| A_52_P9165 | 150.7    | Detected   | 89.7     | Detected   | 83.7    | Detected   | 115.8   | Detected   | Zbtb34        | 0.768414068 | 0.5554081  | 1.2909699  | 0.9331104 |
| A_55_P2407 | 65.2     | Detected   | 55.1     | Detected   | 45      | Detected   | 50.1    | Detected   | Fam92a        | 0.768404908 | 0.69018405 | 0.9092559  | 0.8166969 |
| A_51_P1036 | 9949.4   | Detected   | 6145.1   | Detected   | 7239.7  | Detected   | 7645.1  | Detected   | Trim8         | 0.768398094 | 0.72765192 | 1.24409692 | 1.1781257 |
| A_55_P2044 | 29186.4  | Detected   | 14421.1  | Detected   | 16078.1 | Detected   | 22423.6 | Detected   | Cxcl11        | 0.76828934  | 0.55087644 | 1.55491606 | 1.1149011 |
| A_51_P3244 | 3813.4   | Detected   | 3067.5   | Detected   | 4654.9  | Detected   | 2929.7  | Detected   | Vti1a         | 0.768264541 | 1.22066922 | 0.95507742 | 1.5174898 |
| A_66_P1163 | 22       | Detected   | 27       | Detected   | 5.4     | Not Detect | 16.9    | Not Detect | Gm3428        | 0.768181818 | 0.24545455 | 0.62592593 | 0.2       |
| A_52_P4205 | 5127.3   | Detected   | 2313.7   | Detected   | 3546.8  | Detected   | 3938.5  | Detected   | Acta2         | 0.768143077 | 0.69174809 | 1.7022518  | 1.5329559 |
| A_55_P2182 | 114914.1 | Detected   | 128370.1 | Detected   | 89389.4 | Detected   | 88267.5 | Detected   | Ywhaq         | 0.768117228 | 0.77788017 | 0.68760171 | 0.6963413 |
| A_55_P1970 | 3512.8   | Detected   | 2579.2   | Detected   | 2577    | Detected   | 2698.1  | Detected   | Itch          | 0.768076748 | 0.73360282 | 1.04609957 | 0.999147  |
| A_55_P2043 | 442.8    | Detected   | 5589.8   | Detected   | 226.2   | Detected   | 340.1   | Detected   | Hs3st6        | 0.768066847 | 0.51084011 | 0.06084296 | 0.0404666 |
| A_55_P2235 | 409.5    | Detected   | 233.3    | Detected   | 251.4   | Detected   | 314.5   | Detected   | C130068B02Rik | 0.768009768 | 0.61391941 | 1.34804972 | 1.0775825 |
| A_51_P1182 | 1029.4   | Detected   | 1203.3   | Detected   | 855     | Detected   | 790.5   | Detected   | Gm1943        | 0.767923062 | 0.83058092 | 0.65694341 | 0.710546  |
| A_55_P2070 | 807.9    | Detected   | 567.7    | Detected   | 421.2   | Detected   | 620.4   | Detected   | 4930402H24Rik | 0.767916821 | 0.52135165 | 1.09283072 | 0.7419412 |
| A_55_P2134 | 859.1    | Detected   | 627.5    | Detected   | 873.3   | Detected   | 659.7   | Detected   | Gm4944        | 0.767896636 | 1.01652893 | 1.05131474 | 1.3917131 |
| A_55_P2207 | 164.1    | Detected   | 93.7     | Detected   | 101.6   | Detected   | 126     | Detected   | Image:619641  | 0.767824497 | 0.61913467 | 1.34471718 | 1.0843116 |
| A_51_P4476 | 3870.9   | Detected   | 2749.3   | Detected   | 2520.2  | Detected   | 2972    | Detected   | Ptpn12        | 0.767780103 | 0.65106306 | 1.08100244 | 0.9166697 |
| A_55_P1993 | 1457.8   | Detected   | 1465.9   | Detected   | 1671.7  | Detected   | 1119.2  | Detected   | Rmrp          | 0.767732199 | 1.14672795 | 0.76349001 | 1.1403916 |
| A_55_P2094 | 14.2     | Not Detect | 15.9     | Not Detect | 21.8    | Detected   | 10.9    | Not Detect | Trp53tg5      | 0.767605634 | 1.53521127 | 0.68553459 | 1.3710692 |
| A_66_P1222 | 512      | Detected   | 417.2    | Detected   | 479.8   | Detected   | 392.9   | Detected   | Mettl8        | 0.767382813 | 0.93710938 | 0.94175455 | 1.1500479 |
| A_66_P1140 | 11740    | Detected   | 13208.3  | Detected   | 13284.7 | Detected   | 9008.5  | Detected   | Sco2          | 0.767333901 | 1.13157581 | 0.68203327 | 1.0057842 |
| A_55_P2014 | 26153.7  | Detected   | 23419    | Detected   | 21397   | Detected   | 20066.5 | Detected   | Racgap1       | 0.767252817 | 0.81812516 | 0.856847   | 0.9136598 |
| A_55_P2003 | 662.5    | Detected   | 528.8    | Detected   | 447.3   | Detected   | 508.3   | Detected   | Zc4h2         | 0.767245283 | 0.67516981 | 0.96123298 | 0.8458775 |
| A_51_P5123 | 23.2     | Detected   | 22.7     | Detected   | 22.8    | Detected   | 17.8    | Not Detect | Kirrel2       | 0.767241379 | 0.98275862 | 0.78414097 | 1.0044053 |
| A_55_P2096 | 320.5    | Detected   | 751.1    | Detected   | 330.1   | Detected   | 245.9   | Detected   | Mreg          | 0.76723869  | 1.0299532  | 0.3273865  | 0.4394887 |
| A_55_P2002 | 4306.9   | Detected   | 2488.1   | Detected   | 3064    | Detected   | 3304.4  | Detected   | Trim46        | 0.767233973 | 0.71141656 | 1.32808167 | 1.2314618 |
| A_55_P2385 | 14.6     | Detected   | 7.7      | Not Detect | 30.6    | Detected   | 11.2    | Not Detect | Gm14634       | 0.767123288 | 2.09589041 | 1.45454545 | 3.974026  |
| A_51_P1247 | 6357.4   | Detected   | 8142.8   | Detected   | 7270.5  | Detected   | 4876.2  | Detected   | Tgfb3         | 0.767011671 | 1.1436279  | 0.59883578 | 0.8928747 |
| A_55_P2068 | 13.3     | Not Detect | 23.3     | Detected   | 11.8    | Not Detect | 10.2    | Not Detect | Lyzl4         | 0.766917293 | 0.88721805 | 0.43776824 | 0.5064378 |
| A_55_P1973 | 8959.7   | Detected   | 5773.6   | Detected   | 6755.5  | Detected   | 6871    | Detected   | Nrbp1         | 0.766878355 | 0.7539873  | 1.19007205 | 1.1700672 |
| A_55_P2457 | 131.2    | Detected   | 71.4     | Detected   | 96.1    | Detected   | 100.6   | Detected   | Wdfy3         | 0.766768293 | 0.73246951 | 1.40896359 | 1.3459384 |
| A_55_P2055 | 11024    | Detected   | 8522     | Detected   | 8583.7  | Detected   | 8452.6  | Detected   | Agpat1        | 0.766745283 | 0.77863752 | 0.99185637 | 1.0072401 |
| A_51_P3320 | 55.3     | Detected   | 47.9     | Detected   | 53.7    | Detected   | 42.4    | Not Detect | Aste1         | 0.766726944 | 0.97106691 | 0.88517745 | 1.1210856 |
| A_55_P1970 | 137.6    | Detected   | 95.1     | Detected   | 92.9    | Detected   | 105.5   | Detected   | Gm10336       | 0.766715116 | 0.67514535 | 1.10935857 | 0.9768665 |
| A_55_P2147 | 1747.2   | Detected   | 1170.2   | Detected   | 1462    | Detected   | 1339.6  | Detected   | Orai1         | 0.766712454 | 0.8367674  | 1.14476158 | 1.2493591 |
| A_52_P1191 | 2598.2   | Detected   | 2120.7   | Detected   | 2142.5  | Detected   | 1992    | Detected   | LOC101056366  | 0.766684628 | 0.82460934 | 0.93931249 | 1.0102796 |
| A_55_P2123 | 949.8    | Detected   | 717      | Detected   | 543.4   | Detected   | 728.1   | Detected   | Ncor2         | 0.766582438 | 0.57212045 | 1.01548117 | 0.7578801 |
| A_55_P1987 | 3365.3   | Detected   | 2543.3   | Detected   | 2495.1  | Detected   | 2579.7  | Detected   | Chpf2         | 0.766558702 | 0.74141978 | 1.01431211 | 0.9810482 |
| A_55_P2171 | 8135.3   | Detected   | 6163.5   | Detected   | 8112    | Detected   | 6236    | Detected   | Sap30bp       | 0.766535961 | 0.99713594 | 1.0117628  | 1.3161353 |
| A_52_P5663 | 36.4     | Detected   | 24.1     | Detected   | 20.8    | Detected   | 27.9    | Not Detect | Chia          | 0.766483516 | 0.57142857 | 1.15767635 | 0.8630705 |

|            |         |            |          |            |          |            |          |            |               |             |            |            |           |
|------------|---------|------------|----------|------------|----------|------------|----------|------------|---------------|-------------|------------|------------|-----------|
| A_55_P1955 | 42336.7 | Detected   | 37496.3  | Detected   | 31916.6  | Detected   | 32446.5  | Detected   | Ccm2          | 0.766391807 | 0.75387548 | 0.86532538 | 0.8511933 |
| A_52_P2227 | 4617    | Detected   | 3692.6   | Detected   | 5270.5   | Detected   | 3538.2   | Detected   | Pigu          | 0.76634178  | 1.14154213 | 0.95818664 | 1.4273141 |
| A_51_P4652 | 364421  | Detected   | 322573.2 | Detected   | 283770.4 | Detected   | 279261.8 | Detected   | Lgals1        | 0.766316431 | 0.77868839 | 0.86573156 | 0.8797085 |
| A_55_P2079 | 1041.7  | Detected   | 373.2    | Detected   | 699.5    | Detected   | 798.2    | Detected   | Ppnr          | 0.76624748  | 0.67149851 | 2.13879957 | 1.8743301 |
| A_55_P2112 | 21096.6 | Detected   | 20761    | Detected   | 19954.5  | Detected   | 16164.7  | Detected   | Ddx18         | 0.766222993 | 0.94586331 | 0.77860893 | 0.9611531 |
| A_51_P3659 | 23766.4 | Detected   | 17505.5  | Detected   | 24153.3  | Detected   | 18209.4  | Detected   | Tor1a         | 0.76618251  | 1.01627929 | 1.04021022 | 1.3797549 |
| A_52_P1142 | 935.2   | Detected   | 922.9    | Detected   | 689.7    | Detected   | 716.5    | Detected   | Armcx5        | 0.766146279 | 0.73748931 | 0.77635714 | 0.7473182 |
| A_55_P2078 | 1179.7  | Detected   | 1302.3   | Detected   | 893.8    | Detected   | 903.8    | Detected   | Gm1943        | 0.766126981 | 0.75765025 | 0.69400292 | 0.6863242 |
| A_66_P1166 | 6569.3  | Detected   | 6628.8   | Detected   | 5635.4   | Detected   | 5032.4   | Detected   | Rps8          | 0.766048133 | 0.85783873 | 0.7591721  | 0.8501388 |
| A_51_P1070 | 26.5    | Detected   | 29.6     | Detected   | 9.2      | Not Detect | 20.3     | Not Detect | Kif5a         | 0.766037736 | 0.34716981 | 0.68581081 | 0.3108108 |
| A_55_P2093 | 18587.8 | Detected   | 13318.8  | Detected   | 18319.2  | Detected   | 14237.6  | Detected   | LOC101055727  | 0.765964773 | 0.98554966 | 1.06898519 | 1.3754392 |
| A_55_P2053 | 398.1   | Detected   | 348.1    | Detected   | 348      | Detected   | 304.9    | Detected   | Ppp2r1b       | 0.765887968 | 0.87415222 | 0.87589773 | 0.9997127 |
| A_51_P3615 | 22484.4 | Detected   | 14676.1  | Detected   | 17748.3  | Detected   | 17218.8  | Detected   | Rab11b        | 0.765810962 | 0.78936062 | 1.17325447 | 1.2093335 |
| A_51_P2868 | 48468.4 | Detected   | 33447.4  | Detected   | 30272    | Detected   | 37112.5  | Detected   | Ncor2         | 0.765705078 | 0.62457189 | 1.10957802 | 0.9050629 |
| A_55_P2078 | 74083.4 | Detected   | 50669.3  | Detected   | 63016.1  | Detected   | 56719.4  | Detected   | Nsfl1c        | 0.765615509 | 0.85061026 | 1.11940366 | 1.2436742 |
| A_55_P2054 | 1418.3  | Detected   | 1245.2   | Detected   | 1010.9   | Detected   | 1085.8   | Detected   | Iffo2         | 0.765564408 | 0.71275471 | 0.87198844 | 0.8118375 |
| A_55_P2089 | 77.6    | Detected   | 74.4     | Detected   | 72.9     | Detected   | 59.4     | Detected   | Atp6v1g2      | 0.765463918 | 0.93943299 | 0.7983871  | 0.9798387 |
| A_55_P2004 | 95.5    | Detected   | 168.1    | Detected   | 48.4     | Detected   | 73.1     | Detected   | Serpib2       | 0.765445026 | 0.50680628 | 0.4348602  | 0.2879239 |
| A_51_P3464 | 10249.2 | Detected   | 9090.3   | Detected   | 8846.9   | Detected   | 7842.3   | Detected   | Noc4l         | 0.765162159 | 0.86317957 | 0.8627108  | 0.9732242 |
| A_65_P1914 | 5683    | Detected   | 3602.9   | Detected   | 4528     | Detected   | 4347.8   | Detected   | Nln           | 0.765053669 | 0.79676227 | 1.20675012 | 1.2567654 |
| A_52_P2682 | 2005.6  | Detected   | 1504.3   | Detected   | 1500.9   | Detected   | 1534.2   | Detected   | Gm5665        | 0.764958117 | 0.74835461 | 1.01987635 | 0.9977398 |
| A_55_P2043 | 641.9   | Detected   | 463.5    | Detected   | 398      | Detected   | 490.9    | Detected   | Msx2          | 0.764760866 | 0.62003427 | 1.05911543 | 0.8586839 |
| A_55_P2172 | 221     | Detected   | 128      | Detected   | 206.2    | Detected   | 169      | Detected   | Gmnn          | 0.764705882 | 0.93303167 | 1.3203125  | 1.6109375 |
| A_66_P1137 | 11.9    | Not Detect | 46.3     | Detected   | 28.1     | Detected   | 9.1      | Not Detect | Il2rg         | 0.764705882 | 2.36134454 | 0.19654428 | 0.6069114 |
| A_55_P1991 | 16683.8 | Detected   | 12103.9  | Detected   | 15630.5  | Detected   | 12751.5  | Detected   | Alkbh3        | 0.764304295 | 0.9368669  | 1.05350342 | 1.2913606 |
| A_51_P1089 | 6336.3  | Detected   | 4060.9   | Detected   | 4111.9   | Detected   | 4842     | Detected   | Myadm         | 0.764168363 | 0.64894339 | 1.19234652 | 1.0125588 |
| A_52_P6764 | 725.9   | Detected   | 777      | Detected   | 635.9    | Detected   | 554.7    | Detected   | Mtor          | 0.764154842 | 0.87601598 | 0.71389961 | 0.8184041 |
| A_52_P2621 | 31.8    | Detected   | 19.6     | Detected   | 20.7     | Detected   | 24.3     | Not Detect | Prdm15        | 0.764150943 | 0.6509434  | 1.23979592 | 1.0561224 |
| A_55_P2249 | 16.1    | Detected   | 14.7     | Not Detect | 15.7     | Not Detect | 12.3     | Not Detect | Gm13205       | 0.763975155 | 0.97515528 | 0.83673469 | 1.0680272 |
| A_55_P2180 | 16.1    | Detected   | 19       | Detected   | 14.6     | Not Detect | 12.3     | Not Detect | Olf449        | 0.763975155 | 0.9068323  | 0.64736842 | 0.7684211 |
| A_51_P3245 | 59.7    | Detected   | 61       | Detected   | 53.4     | Detected   | 45.6     | Not Detect | B4galt5       | 0.763819095 | 0.89447236 | 0.74754098 | 0.8754098 |
| A_51_P3495 | 12.7    | Not Detect | 139.1    | Detected   | 8.5      | Not Detect | 9.7      | Not Detect | Cd109         | 0.763779528 | 0.66929134 | 0.069734   | 0.0611071 |
| A_55_P1969 | 84931.2 | Detected   | 77915.1  | Detected   | 73541.9  | Detected   | 64865.5  | Compromis  | Morf4l2       | 0.763741711 | 0.86589969 | 0.83251514 | 0.9438722 |
| A_51_P2674 | 1220.1  | Detected   | 507.3    | Detected   | 213.5    | Detected   | 931.8    | Detected   | Cdc42ep3      | 0.763707893 | 0.17498566 | 1.83678297 | 0.4208555 |
| A_51_P4173 | 636.8   | Detected   | 463.5    | Detected   | 426.5    | Detected   | 486.3    | Detected   | Zfp236        | 0.76366206  | 0.66975503 | 1.04919094 | 0.9201726 |
| A_52_P2629 | 6395.9  | Detected   | 4986.9   | Detected   | 4604.1   | Detected   | 4884.2   | Detected   | Rab10         | 0.76364546  | 0.71985178 | 0.97940604 | 0.9232389 |
| A_55_P2088 | 27.5    | Detected   | 24.6     | Detected   | 31.1     | Detected   | 21       | Not Detect | Olf1388       | 0.763636364 | 1.13090909 | 0.85365854 | 1.2642276 |
| A_55_P2071 | 3565.2  | Detected   | 2928.6   | Detected   | 2916.8   | Detected   | 2722.4   | Detected   | Silbp         | 0.763603725 | 0.81813082 | 0.92959093 | 0.9959708 |
| A_55_P2424 | 25.8    | Detected   | 36.1     | Detected   | 29.9     | Detected   | 19.7     | Not Detect | 4833427F10Rik | 0.763565891 | 1.15891473 | 0.54570637 | 0.8282548 |
| A_52_P6222 | 138.3   | Detected   | 82.4     | Detected   | 44.6     | Detected   | 105.6    | Detected   | 6030419C18Rik | 0.763557484 | 0.32248735 | 1.2815534  | 0.5412621 |

|            |                  |                  |                  |                  |         |             |            |            |           |
|------------|------------------|------------------|------------------|------------------|---------|-------------|------------|------------|-----------|
| A_55_P2134 | 363.7 Detected   | 237.6 Detected   | 347.9 Detected   | 277.7 Detected   | Cacfd1  | 0.76354138  | 0.9565576  | 1.16877104 | 1.4642256 |
| A_51_P2402 | 49.9 Detected    | 102.7 Detected   | 25.3 Detected    | 38.1 Not Detect  | Rrad    | 0.763527054 | 0.50701403 | 0.37098345 | 0.2463486 |
| A_55_P1974 | 137.4 Detected   | 123.2 Detected   | 209.3 Detected   | 104.9 Detected   | Stard6  | 0.763464338 | 1.52328967 | 0.85146104 | 1.6988636 |
| A_55_P2089 | 90607.1 Detected | 74317.9 Detected | 81376.4 Detected | 69173.8 Detected | Eif2s2  | 0.763447898 | 0.89812388 | 0.93078249 | 1.0949771 |
| A_55_P2043 | 30 Detected      | 25 Detected      | 38.8 Detected    | 22.9 Not Detect  | Nrip2   | 0.763333333 | 1.29333333 | 0.916      | 1.552     |
| A_51_P2978 | 1076.2 Detected  | 961 Detected     | 617.5 Detected   | 821.4 Detected   | Kctd6   | 0.763241033 | 0.57377811 | 0.85473465 | 0.6425598 |
| A_65_P1345 | 11.4 Not Detect  | 241.7 Detected   | 3.1 Not Detect   | 8.7 Not Detect   | Cd300lb | 0.763157895 | 0.27192982 | 0.03599504 | 0.0128258 |
| A_55_P2049 | 2867.3 Detected  | 2923.1 Detected  | 3145.2 Detected  | 2188.2 Detected  | Mettl6  | 0.763156977 | 1.09692045 | 0.74858883 | 1.075981  |
| A_52_P6005 | 2266.2 Detected  | 1466.9 Detected  | 1613.4 Detected  | 1729.3 Detected  | Bahd1   | 0.763083576 | 0.71194069 | 1.17888063 | 1.0998705 |
| A_55_P2078 | 17.3 Detected    | 13.9 Not Detect  | 5.3 Not Detect   | 13.2 Not Detect  | Cdca2   | 0.76300578  | 0.30635838 | 0.94964029 | 0.381295  |
| A_55_P2039 | 117.3 Detected   | 76.3 Detected    | 86.5 Detected    | 89.5 Detected    | Grik2   | 0.763000853 | 0.7374254  | 1.17300131 | 1.1336828 |
| A_52_P3041 | 3419 Detected    | 3178 Detected    | 1781.8 Detected  | 2608.6 Detected  | Mmp14   | 0.762971629 | 0.52114653 | 0.82083071 | 0.5606671 |
| A_55_P2015 | 987 Detected     | 1044.6 Detected  | 889.5 Detected   | 752.9 Detected   | Trim13  | 0.762816616 | 0.90121581 | 0.72075436 | 0.8515221 |
| A_65_P1587 | 9191.9 Detected  | 6534.3 Detected  | 6785.3 Detected  | 7011 Detected    | Chpf2   | 0.762736757 | 0.73818253 | 1.07295349 | 1.0384127 |
| A_55_P2025 | 852.6 Detected   | 652 Detected     | 546.4 Detected   | 650.3 Detected   | Spred2  | 0.76272578  | 0.64086324 | 0.99739264 | 0.8380368 |
| A_52_P2858 | 106.2 Detected   | 96.1 Detected    | 101 Detected     | 81 Detected      | Zmym2   | 0.762711864 | 0.95103578 | 0.84287201 | 1.0509886 |
| A_55_P2024 | 2071.5 Detected  | 1199.7 Detected  | 1575.3 Detected  | 1579.9 Detected  | Spin1   | 0.762684045 | 0.76046343 | 1.31691256 | 1.3130783 |
| A_55_P1974 | 7331.7 Detected  | 5748.6 Detected  | 5768.1 Detected  | 5591.7 Detected  | Msh3    | 0.762674414 | 0.78673432 | 0.9727064  | 1.0033921 |
| A_55_P1971 | 722.1 Detected   | 513.2 Detected   | 578.1 Detected   | 550.7 Detected   | Stim2   | 0.762636754 | 0.80058164 | 1.07307093 | 1.1264614 |
| A_55_P2004 | 13502.2 Detected | 10013.2 Detected | 11994.8 Detected | 10295.9 Detected | Imm11   | 0.762534994 | 0.88835893 | 1.02823273 | 1.1978988 |
| A_65_P1239 | 55287.5 Detected | 38952.6 Detected | 42552.7 Detected | 42147.9 Detected | Timp2   | 0.762340493 | 0.76966222 | 1.08203047 | 1.0924226 |
| A_55_P1996 | 11843.9 Detected | 7928.1 Detected  | 9777.8 Detected  | 9027.5 Detected  | Gm14326 | 0.762206706 | 0.82555577 | 1.13867131 | 1.2333094 |
| A_55_P2140 | 3626.9 Detected  | 2403.8 Detected  | 3241.3 Detected  | 2764.4 Detected  | Tnfaip8 | 0.762193609 | 0.89368331 | 1.15001248 | 1.3484067 |
| A_55_P2008 | 554.1 Detected   | 473.6 Detected   | 664 Detected     | 422.3 Detected   | Kras    | 0.762136798 | 1.19833965 | 0.89168074 | 1.402027  |
| A_65_P1668 | 9085.6 Detected  | 5679 Detected    | 5235.8 Detected  | 6923.7 Detected  | B4galt5 | 0.762052038 | 0.57627454 | 1.21917591 | 0.9219581 |
| A_52_P2461 | 3172.5 Detected  | 3012 Detected    | 2065 Detected    | 2417.5 Detected  | Ptprk   | 0.762017336 | 0.65090623 | 0.80262284 | 0.685591  |
| A_55_P2133 | 54.2 Detected    | 17.3 Detected    | 55.8 Detected    | 41.3 Not Detect  | Bhlhe41 | 0.76199262  | 1.0295203  | 2.38728324 | 3.2254335 |
| A_55_P1996 | 10623.5 Detected | 7652.4 Detected  | 11256.6 Detected | 8094.1 Detected  | Soga2   | 0.76190521  | 1.0595943  | 1.05772045 | 1.4709895 |
| A_55_P2059 | 105.8 Detected   | 75.3 Detected    | 122 Detected     | 80.6 Detected    | Zfp383  | 0.761814745 | 1.15311909 | 1.07038513 | 1.6201859 |
| A_51_P4836 | 4457.9 Detected  | 1988.7 Detected  | 2177.7 Detected  | 3395.7 Detected  | Trim3   | 0.761726373 | 0.48850356 | 1.70749736 | 1.095037  |
| A_55_P2001 | 7394.6 Detected  | 5294.2 Detected  | 6363.7 Detected  | 5631.6 Detected  | Gm14443 | 0.761582777 | 0.86058746 | 1.06373012 | 1.2020135 |
| A_55_P2117 | 4281.3 Detected  | 4425.5 Detected  | 3091.1 Detected  | 3260.5 Detected  | Zmym1   | 0.761567748 | 0.72200033 | 0.73675291 | 0.6984747 |
| A_55_P2164 | 17.6 Detected    | 25.8 Detected    | 22.8 Detected    | 13.4 Not Detect  | C7      | 0.761363636 | 1.29545455 | 0.51937984 | 0.8837209 |
| A_55_P2105 | 5357 Detected    | 4642.9 Detected  | 5320.1 Detected  | 4078 Detected    | Tmed5   | 0.761246967 | 0.99311182 | 0.87833035 | 1.1458571 |
| A_51_P4932 | 5094.1 Detected  | 4533.7 Detected  | 5114.7 Detected  | 3877.6 Detected  | Mrps5   | 0.761194323 | 1.00404389 | 0.85528376 | 1.1281514 |
| A_51_P2495 | 13.4 Not Detect  | 22 Detected      | 9.2 Not Detect   | 10.2 Not Detect  | Lrrc6   | 0.76119403  | 0.68656716 | 0.46363636 | 0.4181818 |
| A_55_P2177 | 712.2 Detected   | 273.6 Detected   | 863.2 Detected   | 542.1 Detected   | Aqp11   | 0.761162595 | 1.2120191  | 1.98135965 | 3.1549708 |
| A_55_P2125 | 3817.6 Detected  | 3498.9 Detected  | 3081.1 Detected  | 2905.5 Detected  | Ola1    | 0.76108026  | 0.80707775 | 0.83040384 | 0.880591  |
| A_55_P1987 | 16596.7 Detected | 10950 Detected   | 18161.5 Detected | 12630.3 Detected | Pigt    | 0.761012731 | 1.0942838  | 1.15345205 | 1.6585845 |
| A_52_P3550 | 8173.5 Detected  | 5214.6 Detected  | 7616.4 Detected  | 6218.5 Detected  | Rab40c  | 0.760812381 | 0.9318407  | 1.19251716 | 1.4605914 |



|            |         |            |         |          |         |            |         |            |               |             |            |            |           |
|------------|---------|------------|---------|----------|---------|------------|---------|------------|---------------|-------------|------------|------------|-----------|
| A_51_P3692 | 21955.2 | Detected   | 14162.1 | Detected | 17902.8 | Detected   | 16703.4 | Detected   | Tpx2          | 0.760794709 | 0.81542414 | 1.17944373 | 1.2641346 |
| A_55_P2014 | 1169.8  | Detected   | 564.1   | Detected | 844.2   | Detected   | 889.9   | Detected   | Bach1         | 0.76072833  | 0.72166182 | 1.57755717 | 1.4965432 |
| A_51_P1495 | 8042.1  | Detected   | 6272.5  | Detected | 4873.4  | Detected   | 6117.6  | Detected   | Apbb2         | 0.760696833 | 0.605986   | 0.9753049  | 0.776947  |
| A_55_P2181 | 11.7    | Not Detect | 40.6    | Detected | 7.8     | Not Detect | 8.9     | Not Detect | Nnmt          | 0.760683761 | 0.66666667 | 0.21921182 | 0.1921182 |
| A_51_P2677 | 12638.1 | Detected   | 10277   | Detected | 11629.5 | Detected   | 9612.7  | Detected   | Zc3h15        | 0.76061275  | 0.9201937  | 0.93536051 | 1.1316046 |
| A_55_P1995 | 4144.7  | Detected   | 2480.4  | Detected | 2908.5  | Detected   | 3152.2  | Detected   | Arhgap11a     | 0.760537554 | 0.70173957 | 1.27084341 | 1.1725931 |
| A_52_P5367 | 1919.8  | Detected   | 1660.2  | Detected | 1523.9  | Detected   | 1460    | Detected   | Hpcal1        | 0.760495885 | 0.7937806  | 0.87941212 | 0.9179015 |
| A_52_P3179 | 2858.7  | Detected   | 1886    | Detected | 2695.9  | Detected   | 2173.9  | Detected   | Zfp948        | 0.760450554 | 0.94305104 | 1.15265111 | 1.4294274 |
| A_52_P5938 | 67.2    | Detected   | 57      | Detected | 70.9    | Detected   | 51.1    | Not Detect | 4933402P03Rik | 0.760416667 | 1.05505952 | 0.89649123 | 1.2438596 |
| A_66_P1182 | 34173.1 | Detected   | 25981.6 | Detected | 23774.9 | Detected   | 25983.3 | Detected   | Hnrnpa0       | 0.760343662 | 0.69571973 | 1.00006543 | 0.9150668 |
| A_55_P2033 | 603.7   | Detected   | 577.5   | Detected | 501.5   | Detected   | 459     | Detected   | Zdhc20        | 0.760311413 | 0.83071062 | 0.79480519 | 0.8683983 |
| A_55_P2145 | 22.1    | Detected   | 20      | Detected | 15.1    | Not Detect | 16.8    | Not Detect | Fbxw15        | 0.760180995 | 0.68325792 | 0.84       | 0.755     |
| A_52_P6810 | 61.7    | Detected   | 38.3    | Detected | 73.2    | Detected   | 46.9    | Detected   | Gm10759       | 0.76012966  | 1.18638574 | 1.22454308 | 1.9112272 |
| A_51_P2750 | 25677.9 | Detected   | 21657.5 | Detected | 23661.9 | Detected   | 19516   | Detected   | Mrps18a       | 0.760030999 | 0.92148891 | 0.9011197  | 1.0925499 |
| A_55_P2036 | 62.5    | Detected   | 43.4    | Detected | 41      | Detected   | 47.5    | Detected   | Gm10615       | 0.76        | 0.656      | 1.09447005 | 0.9447005 |
| A_55_P1952 | 50      | Detected   | 44.4    | Detected | 37      | Detected   | 38      | Not Detect | Cphx1         | 0.76        | 0.74       | 0.85585586 | 0.8333333 |
| A_55_P2071 | 5395.6  | Detected   | 5504.1  | Detected | 4190.7  | Detected   | 4100.5  | Detected   | Nab2          | 0.759971088 | 0.77668841 | 0.7449901  | 0.7613779 |
| A_51_P1390 | 4459.4  | Detected   | 4978.5  | Detected | 4007.7  | Detected   | 3388.8  | Detected   | Wdr45         | 0.75992286  | 0.89870835 | 0.68068695 | 0.8050015 |
| A_55_P2068 | 78717.7 | Detected   | 50486.6 | Detected | 47295.2 | Detected   | 59815.1 | Detected   | Stmn1         | 0.759868492 | 0.6008204  | 1.1847718  | 0.9367872 |
| A_52_P3770 | 53.3    | Detected   | 60.3    | Detected | 69.1    | Detected   | 40.5    | Not Detect | Slc16a10      | 0.759849906 | 1.29643527 | 0.67164179 | 1.145937  |
| A_55_P2177 | 25042.7 | Detected   | 20757.6 | Detected | 18357.9 | Detected   | 19027.7 | Detected   | Cdk2ap1       | 0.759810244 | 0.73306393 | 0.91666185 | 0.8843941 |
| A_55_P2020 | 82557.1 | Detected   | 53191.7 | Detected | 73937.1 | Detected   | 62725.1 | Detected   | Prkar1a       | 0.759778384 | 0.89558742 | 1.17922721 | 1.390012  |
| A_51_P1776 | 382.8   | Detected   | 291.5   | Detected | 319.1   | Detected   | 290.8   | Detected   | Gabbr1        | 0.759665622 | 0.83359457 | 0.99759863 | 1.0946827 |
| A_51_P3941 | 9455.2  | Detected   | 8336.1  | Detected | 10219.9 | Detected   | 7182.5  | Detected   | Ddx51         | 0.75963491  | 1.08087613 | 0.86161394 | 1.225981  |
| A_55_P2085 | 359.8   | Detected   | 223.3   | Detected | 311.9   | Detected   | 273.3   | Detected   | Stk38         | 0.75958866  | 0.86687048 | 1.22391402 | 1.3967756 |
| A_51_P4394 | 610.1   | Detected   | 391.1   | Detected | 400.5   | Detected   | 463.4   | Detected   | Padi1         | 0.759547615 | 0.65644976 | 1.18486321 | 1.0240348 |
| A_55_P2035 | 60.3    | Detected   | 63.1    | Detected | 59.2    | Detected   | 45.8    | Not Detect | Smarcd2       | 0.759535655 | 0.98175788 | 0.72583201 | 0.9381933 |
| A_55_P2121 | 11018.3 | Detected   | 10653.7 | Detected | 6175.5  | Detected   | 8368.5  | Detected   | Trp53i13      | 0.75950918  | 0.56047666 | 0.78550175 | 0.5796578 |
| A_52_P1020 | 1302.4  | Detected   | 939.9   | Detected | 1105    | Detected   | 989.1   | Detected   | Srrd          | 0.759444103 | 0.84843366 | 1.05234599 | 1.175657  |
| A_55_P1973 | 62.3    | Detected   | 71.9    | Detected | 55.2    | Detected   | 47.3    | Not Detect | Fam216b       | 0.759229535 | 0.88603531 | 0.65785814 | 0.767733  |
| A_55_P2093 | 16107.1 | Detected   | 13184.5 | Detected | 15705.7 | Detected   | 12228.2 | Detected   | Gemin6        | 0.759180734 | 0.97507931 | 0.92746786 | 1.1912245 |
| A_55_P2164 | 1398.5  | Detected   | 1076.8  | Detected | 4006.2  | Detected   | 1061.6  | Detected   | Slc9a3r2      | 0.759099035 | 2.86464069 | 0.9858841  | 3.7204681 |
| A_55_P2049 | 190     | Detected   | 128     | Detected | 188.8   | Detected   | 144.2   | Detected   | Zfp93         | 0.758947368 | 0.99368421 | 1.1265625  | 1.475     |
| A_55_P2226 | 36.5    | Detected   | 32.3    | Detected | 28.7    | Detected   | 27.7    | Not Detect | 4933433G19Rik | 0.75890411  | 0.78630137 | 0.85758514 | 0.8885449 |
| A_51_P2521 | 8026.1  | Detected   | 6986.2  | Detected | 6114.9  | Detected   | 6090.8  | Detected   | Mmgt1         | 0.758874173 | 0.76187688 | 0.87183304 | 0.8752827 |
| A_55_P2067 | 539     | Detected   | 471.9   | Detected | 506.8   | Detected   | 409     | Detected   | Mgme1         | 0.758812616 | 0.94025974 | 0.86670905 | 1.0739563 |
| A_51_P1289 | 81976   | Detected   | 50626.8 | Detected | 61016.9 | Detected   | 62201.9 | Detected   | Akr1b8        | 0.758781839 | 0.74432639 | 1.22863582 | 1.2052292 |
| A_55_P2032 | 45.6    | Detected   | 37.4    | Detected | 37.3    | Detected   | 34.6    | Not Detect | Pip5k1c       | 0.75877193  | 0.81798246 | 0.92513369 | 0.9973262 |
| A_55_P1990 | 1579.8  | Detected   | 1399.8  | Detected | 1273.7  | Detected   | 1198.7  | Detected   | Elavl4        | 0.758766933 | 0.8062413  | 0.85633662 | 0.9099157 |
| A_55_P2118 | 31.5    | Detected   | 36.3    | Detected | 21.5    | Detected   | 23.9    | Not Detect | Zfp61         | 0.758730159 | 0.68253968 | 0.6584022  | 0.5922865 |

|            |          |            |         |            |          |            |         |            |               |             |            |            |           |
|------------|----------|------------|---------|------------|----------|------------|---------|------------|---------------|-------------|------------|------------|-----------|
| A_55_P2006 | 3606.8   | Detected   | 2256.9  | Detected   | 3938.8   | Detected   | 2736.4  | Detected   | Rbbp9         | 0.758678053 | 1.09204835 | 1.21245957 | 1.7452258 |
| A_55_P1971 | 14.5     | Not Detect | 22.8    | Detected   | 8.5      | Not Detect | 11      | Not Detect | Pla2r1        | 0.75862069  | 0.5862069  | 0.48245614 | 0.372807  |
| A_51_P3990 | 32.3     | Detected   | 33.3    | Detected   | 41.5     | Detected   | 24.5    | Not Detect | Hmbox1        | 0.758513932 | 1.28482972 | 0.73573574 | 1.2462462 |
| A_55_P2145 | 35.6     | Detected   | 22.9    | Detected   | 23.8     | Detected   | 27      | Not Detect | Maged2        | 0.758426966 | 0.66853933 | 1.1790393  | 1.0393013 |
| A_51_P3636 | 103889.9 | Detected   | 87953.6 | Detected   | 110443.3 | Detected   | 78782.1 | Detected   | Snrpe         | 0.758322994 | 1.06308024 | 0.89572343 | 1.2556996 |
| A_51_P5000 | 21.1     | Detected   | 37.6    | Detected   | 22.8     | Detected   | 16      | Not Detect | Klra7         | 0.758293839 | 1.08056872 | 0.42553191 | 0.606383  |
| A_55_P2050 | 1635.3   | Detected   | 1190.8  | Detected   | 1324.6   | Detected   | 1240    | Detected   | Fance         | 0.758270654 | 0.81000428 | 1.04131676 | 1.1123614 |
| A_55_P2174 | 31       | Detected   | 30.7    | Detected   | 14.7     | Not Detect | 23.5    | Not Detect | Gm2102        | 0.758064516 | 0.47419355 | 0.76547231 | 0.4788274 |
| A_51_P4211 | 1321.2   | Detected   | 1065.8  | Detected   | 1184.5   | Detected   | 1001.5  | Detected   | Sys1          | 0.758023009 | 0.89653345 | 0.93966973 | 1.1113717 |
| A_55_P2179 | 295      | Detected   | 280.2   | Detected   | 248.3    | Detected   | 223.6   | Detected   | 6720473M11Rik | 0.757966102 | 0.84169492 | 0.79800143 | 0.8861527 |
| A_66_P1011 | 3170.7   | Detected   | 1514.1  | Detected   | 1693.2   | Detected   | 2403    | Detected   | Tnrc18        | 0.75787681  | 0.53401457 | 1.58708143 | 1.1182881 |
| A_65_P0822 | 3638.4   | Detected   | 2825.5  | Detected   | 3615.9   | Detected   | 2757.3  | Detected   | Snx5          | 0.757833113 | 0.99381596 | 0.97586268 | 1.2797381 |
| A_55_P2115 | 11857.9  | Detected   | 10663.8 | Detected   | 10143.6  | Detected   | 8983.9  | Detected   | Pot1a         | 0.757629934 | 0.85542971 | 0.84246704 | 0.9512181 |
| A_55_P2433 | 6741.3   | Detected   | 4647.7  | Detected   | 5576.1   | Detected   | 5106.4  | Detected   | Bloc1s6       | 0.757480011 | 0.827155   | 1.09869398 | 1.1997547 |
| A_55_P2020 | 6111     | Detected   | 3993.9  | Detected   | 5570.8   | Detected   | 4628    | Detected   | Hmgn2         | 0.75732286  | 0.91160203 | 1.15876712 | 1.3948271 |
| A_51_P2069 | 4825.3   | Detected   | 5247.4  | Detected   | 4244.1   | Detected   | 3654.2  | Detected   | Mnat1         | 0.757300064 | 0.87955153 | 0.69638297 | 0.8088005 |
| A_55_P2139 | 361.1    | Detected   | 357.8   | Detected   | 296.8    | Detected   | 273.4   | Detected   | Phf13         | 0.757130989 | 0.82193298 | 0.76411403 | 0.8295137 |
| A_51_P2535 | 79000.3  | Detected   | 56589.5 | Detected   | 62578.9  | Detected   | 59804.6 | Detected   | Ctsl          | 0.757017378 | 0.79213497 | 1.05681443 | 1.1058394 |
| A_55_P2408 | 14.4     | Detected   | 15.5    | Not Detect | 14.6     | Not Detect | 10.9    | Not Detect | Mtx3          | 0.756944444 | 1.01388889 | 0.70322581 | 0.9419355 |
| A_51_P2966 | 1008     | Detected   | 872.2   | Detected   | 585.9    | Detected   | 762.9   | Detected   | Gadd45a       | 0.756845238 | 0.58125    | 0.87468471 | 0.6717496 |
| A_51_P1728 | 3986.5   | Detected   | 3127.5  | Detected   | 3626.2   | Detected   | 3016.5  | Detected   | Med19         | 0.756678791 | 0.90961997 | 0.96450839 | 1.1594564 |
| A_51_P1391 | 94.1     | Detected   | 37.5    | Detected   | 84.5     | Detected   | 71.2    | Detected   | Cpxm1         | 0.75664187  | 0.89798087 | 1.89866667 | 2.2533333 |
| A_55_P1998 | 2366.4   | Detected   | 1810.8  | Detected   | 1742.6   | Detected   | 1790.4  | Detected   | Eif2ak4       | 0.756592292 | 0.73639283 | 0.98873426 | 0.9623371 |
| A_52_P6904 | 1624     | Detected   | 1330.5  | Detected   | 1086.1   | Detected   | 1228.7  | Detected   | Nkap          | 0.75658867  | 0.66878079 | 0.92348741 | 0.8163097 |
| A_55_P2044 | 19.3     | Detected   | 17.4    | Detected   | 21.9     | Detected   | 14.6    | Not Detect | Gm10532       | 0.756476684 | 1.13471503 | 0.83908046 | 1.2586207 |
| A_55_P2075 | 4310.1   | Detected   | 1965    | Detected   | 2262.6   | Detected   | 3259.9  | Detected   | Orai2         | 0.75633976  | 0.52495302 | 1.65898219 | 1.1514504 |
| A_66_P1048 | 61.5     | Detected   | 37.5    | Detected   | 32.6     | Detected   | 46.5    | Detected   | Trak1         | 0.756097561 | 0.5300813  | 1.24       | 0.8693333 |
| A_55_P1976 | 148.8    | Detected   | 86.1    | Detected   | 75.5     | Detected   | 112.5   | Detected   | 2410018L13Rik | 0.756048387 | 0.50739247 | 1.30662021 | 0.8768873 |
| A_51_P2725 | 9250.5   | Detected   | 9140.3  | Detected   | 8171.2   | Detected   | 6993.6  | Detected   | Naa25         | 0.756023999 | 0.88332523 | 0.765139   | 0.893975  |
| A_51_P1919 | 37.7     | Detected   | 65.5    | Detected   | 25.7     | Detected   | 28.5    | Not Detect | Rem2          | 0.75596817  | 0.68169761 | 0.4351145  | 0.3923664 |
| A_55_P2176 | 17430    | Detected   | 16968.8 | Detected   | 19144.1  | Detected   | 13175.3 | Detected   | Prdx6         | 0.755897877 | 1.09834194 | 0.77644265 | 1.1281941 |
| A_55_P2151 | 13.1     | Not Detect | 22      | Detected   | 14.6     | Not Detect | 9.9     | Not Detect | Fut9          | 0.755725191 | 1.11450382 | 0.45       | 0.6636364 |
| A_52_P1415 | 14627.1  | Detected   | 9598.1  | Detected   | 10523.2  | Detected   | 11053.6 | Detected   | H2afy         | 0.7556932   | 0.71943174 | 1.1516446  | 1.0963837 |
| A_51_P2193 | 1252.2   | Detected   | 820.4   | Detected   | 868.9    | Detected   | 946.1   | Detected   | Six5          | 0.755550232 | 0.69389874 | 1.15321794 | 1.0591175 |
| A_65_P0387 | 390.6    | Detected   | 248.4   | Detected   | 88.1     | Detected   | 295.1   | Detected   | Nav2          | 0.755504352 | 0.22555044 | 1.18800322 | 0.3546699 |
| A_55_P2014 | 6349.1   | Detected   | 4160    | Detected   | 4864.6   | Detected   | 4796.6  | Detected   | Amz2          | 0.755477154 | 0.76618733 | 1.15302885 | 1.169375  |
| A_55_P2138 | 13.9     | Detected   | 21.8    | Detected   | 24.5     | Detected   | 10.5    | Not Detect | Efcab5        | 0.755395683 | 1.76258993 | 0.48165138 | 1.1238532 |
| A_51_P4558 | 31564.8  | Detected   | 23002.5 | Detected   | 25893    | Detected   | 23843.6 | Detected   | Ehd4          | 0.755385746 | 0.8203125  | 1.03656559 | 1.1256603 |
| A_52_P1872 | 136.9    | Detected   | 71.1    | Detected   | 90.6     | Detected   | 103.4   | Detected   | Phka2         | 0.755295836 | 0.66179693 | 1.45428973 | 1.2742616 |
| A_52_P6627 | 377.9    | Detected   | 337.1   | Detected   | 391.9    | Detected   | 285.4   | Detected   | Xrcc2         | 0.75522625  | 1.03704684 | 0.84663305 | 1.162563  |

|            |         |          |         |            |         |            |         |            |               |             |            |            |           |
|------------|---------|----------|---------|------------|---------|------------|---------|------------|---------------|-------------|------------|------------|-----------|
| A_52_P5571 | 1981.7  | Detected | 1369.8  | Detected   | 1569.7  | Detected   | 1496.6  | Detected   | Adnp          | 0.755210173 | 0.79209769 | 1.09256826 | 1.1459337 |
| A_51_P1624 | 10803.8 | Detected | 10483.3 | Detected   | 8483.5  | Detected   | 8158.9  | Detected   | Bcr           | 0.755187989 | 0.78523297 | 0.77827592 | 0.8092395 |
| A_55_P2087 | 2412.3  | Detected | 1182.1  | Detected   | 2999.9  | Detected   | 1821.6  | Detected   | Eva1b         | 0.755129959 | 1.24358496 | 1.54098638 | 2.5377718 |
| A_55_P2184 | 25.3    | Detected | 31.7    | Detected   | 32.3    | Detected   | 19.1    | Not Detect | Gm10589       | 0.754940711 | 1.27667984 | 0.60252366 | 1.0189274 |
| A_55_P1959 | 2981.4  | Detected | 2819.1  | Detected   | 3928.7  | Detected   | 2250.6  | Detected   | AI846148      | 0.754880258 | 1.31773663 | 0.7983399  | 1.3936008 |
| A_51_P3785 | 3728.4  | Detected | 3520.5  | Detected   | 3460    | Detected   | 2814.3  | Detected   | Rpap2         | 0.754827808 | 0.92801202 | 0.79940349 | 0.9828149 |
| A_55_P2165 | 21.6    | Detected | 17.3    | Detected   | 24.4    | Detected   | 16.3    | Not Detect | Athl1         | 0.75462963  | 1.12962963 | 0.94219653 | 1.4104046 |
| A_55_P2041 | 9139.2  | Detected | 6597.5  | Detected   | 9909.3  | Detected   | 6894.4  | Detected   | Pigx          | 0.754376751 | 1.08426339 | 1.04500189 | 1.501978  |
| A_55_P2052 | 17.5    | Detected | 19.9    | Detected   | 15.4    | Not Detect | 13.2    | Not Detect | Crispld2      | 0.754285714 | 0.88       | 0.66331658 | 0.7738693 |
| A_52_P5450 | 86.2    | Detected | 56.8    | Detected   | 54.8    | Detected   | 65      | Detected   | Cep72         | 0.754060325 | 0.63573086 | 1.1443662  | 0.9647887 |
| A_55_P2023 | 86.2    | Detected | 112.6   | Detected   | 11.9    | Not Detect | 65      | Detected   | Aloxe3        | 0.754060325 | 0.13805104 | 0.57726465 | 0.1056838 |
| A_51_P2089 | 8705.6  | Detected | 8540.7  | Detected   | 8637.2  | Detected   | 6564.2  | Detected   | Acbd6         | 0.754020401 | 0.99214299 | 0.76857869 | 1.0112988 |
| A_55_P2077 | 6886    | Detected | 3938.4  | Detected   | 4902    | Detected   | 5190.8  | Detected   | Tubb2a-ps2    | 0.753819344 | 0.71187918 | 1.31799716 | 1.2446679 |
| A_65_P1035 | 22930.2 | Detected | 18860.3 | Detected   | 18874.5 | Detected   | 17285   | Detected   | Srsf6         | 0.753809387 | 0.82312845 | 0.91647535 | 1.0007529 |
| A_55_P2006 | 1147.3  | Detected | 1194.2  | Detected   | 1109.2  | Detected   | 864.8   | Detected   | Bmp1          | 0.75376972  | 0.9667916  | 0.72416681 | 0.9288226 |
| A_51_P3193 | 1920.4  | Detected | 1237.8  | Detected   | 1501.1  | Detected   | 1447.4  | Detected   | Tmx4          | 0.753697146 | 0.78166007 | 1.16933269 | 1.2127161 |
| A_66_P1247 | 3155    | Detected | 2330.3  | Detected   | 2262.7  | Detected   | 2377.9  | Detected   | Ppard         | 0.753692552 | 0.71717908 | 1.02042655 | 0.9709909 |
| A_55_P1982 | 335.3   | Detected | 241.7   | Detected   | 290.1   | Detected   | 252.7   | Detected   | Homer1        | 0.753653445 | 0.86519535 | 1.04551096 | 1.2002482 |
| A_55_P2179 | 34.9    | Detected | 32.6    | Detected   | 17.5    | Detected   | 26.3    | Not Detect | Slc22a15      | 0.753581662 | 0.50143266 | 0.80674847 | 0.5368098 |
| A_55_P2357 | 170.4   | Detected | 152     | Detected   | 99.5    | Detected   | 128.4   | Detected   | 4933415E08Rik | 0.753521127 | 0.58392019 | 0.84473684 | 0.6546053 |
| A_55_P2078 | 50.3    | Detected | 54.3    | Detected   | 32.5    | Detected   | 37.9    | Not Detect | Gm5589        | 0.753479125 | 0.64612326 | 0.69797422 | 0.5985267 |
| A_55_P2105 | 15      | Detected | 14.9    | Not Detect | 10.5    | Not Detect | 11.3    | Not Detect | Wdr64         | 0.753333333 | 0.7        | 0.75838926 | 0.704698  |
| A_52_P1564 | 4720.5  | Detected | 4074.4  | Detected   | 5045.3  | Detected   | 3555.8  | Detected   | Ankrd39       | 0.753267662 | 1.06880627 | 0.87271746 | 1.2382928 |
| A_55_P2177 | 46.2    | Detected | 49.7    | Detected   | 45.4    | Detected   | 34.8    | Not Detect | Gm3086        | 0.753246753 | 0.98268398 | 0.70020121 | 0.9134809 |
| A_55_P2165 | 3994.2  | Detected | 3075.9  | Detected   | 1919.2  | Detected   | 3008.6  | Detected   | Trio          | 0.753242201 | 0.48049672 | 0.97812022 | 0.6239475 |
| A_55_P2167 | 15.8    | Detected | 7.7     | Not Detect | 9.1     | Not Detect | 11.9    | Not Detect | 4931429P17Rik | 0.753164557 | 0.57594937 | 1.54545455 | 1.1818182 |
| A_66_P1380 | 96      | Detected | 18      | Detected   | 32.8    | Detected   | 72.3    | Detected   | 3110009F21Rik | 0.753125    | 0.34166667 | 4.01666667 | 1.8222222 |
| A_51_P3228 | 1367.2  | Detected | 937.9   | Detected   | 1227.8  | Detected   | 1029.6  | Detected   | Sh3bp4        | 0.753071972 | 0.89803979 | 1.09777162 | 1.3090948 |
| A_55_P1955 | 86535.9 | Detected | 60911.3 | Detected   | 77750   | Detected   | 65165.9 | Detected   | Ctsa          | 0.753050468 | 0.89847104 | 1.06984911 | 1.2764462 |
| A_51_P2247 | 14111.9 | Detected | 10921.3 | Detected   | 9963.5  | Detected   | 10626.4 | Detected   | Tmem184b      | 0.753009871 | 0.70603533 | 0.97299772 | 0.9122998 |
| A_51_P1677 | 808     | Detected | 659.5   | Detected   | 905.1   | Detected   | 608.4   | Detected   | Kcnk13        | 0.752970297 | 1.12017327 | 0.92251706 | 1.3724033 |
| A_55_P2080 | 85.4    | Detected | 80.6    | Detected   | 72.8    | Detected   | 64.3    | Detected   | Gm10674       | 0.7529274   | 0.85245902 | 0.79776675 | 0.9032258 |
| A_55_P1990 | 239.2   | Detected | 182.3   | Detected   | 179     | Detected   | 180.1   | Detected   | Gas2l1        | 0.752926421 | 0.74832776 | 0.98793198 | 0.981898  |
| A_55_P2018 | 12044.9 | Detected | 14030.9 | Detected   | 7448.1  | Detected   | 9068.9  | Detected   | Elk3          | 0.752924474 | 0.6183613  | 0.64635198 | 0.5308355 |
| A_55_P1994 | 694.9   | Detected | 501.8   | Detected   | 486.8   | Detected   | 523.2   | Detected   | Adra2b        | 0.752914088 | 0.70053245 | 1.04264647 | 0.9701076 |
| A_55_P2005 | 3957.1  | Detected | 3420.6  | Detected   | 3379.4  | Detected   | 2978.9  | Detected   | Cdk5rap1      | 0.752798767 | 0.85400925 | 0.87087061 | 0.9879553 |
| A_55_P2115 | 2693.2  | Detected | 2198.7  | Detected   | 674.4   | Detected   | 2027.4  | Detected   | Acpl2         | 0.752784791 | 0.25040844 | 0.92209033 | 0.3067267 |
| A_55_P1985 | 254.8   | Detected | 250.6   | Detected   | 209.4   | Detected   | 191.8   | Detected   | Cirbp         | 0.752747253 | 0.82182104 | 0.76536313 | 0.8355946 |
| A_55_P2080 | 31544.1 | Detected | 23163.1 | Detected   | 25199.2 | Detected   | 23741.5 | Detected   | Rbbp7         | 0.75264471  | 0.7988562  | 1.02497075 | 1.0879027 |
| A_55_P2083 | 1034.1  | Detected | 711.8   | Detected   | 996.3   | Detected   | 778.2   | Detected   | Hps1          | 0.752538439 | 0.96344648 | 1.09328463 | 1.3996909 |

|            |          |            |         |            |          |            |          |            |               |             |            |            |           |
|------------|----------|------------|---------|------------|----------|------------|----------|------------|---------------|-------------|------------|------------|-----------|
| A_55_P1966 | 4751.2   | Detected   | 3621.5  | Detected   | 4591.2   | Detected   | 3575.4   | Detected   | Rab5a         | 0.752525678 | 0.9663243  | 0.98727047 | 1.267762  |
| A_55_P2058 | 622.1    | Detected   | 541.7   | Detected   | 510      | Detected   | 468.1    | Detected   | Nhlh1         | 0.752451374 | 0.81980389 | 0.86413144 | 0.9414805 |
| A_51_P3454 | 2940.5   | Detected   | 1612    | Detected   | 2211.8   | Detected   | 2212.5   | Detected   | Pi4k2a        | 0.752423057 | 0.752185   | 1.37251861 | 1.3720844 |
| A_66_P1061 | 2325.3   | Detected   | 2383.2  | Detected   | 1788.1   | Detected   | 1749.6   | Detected   | Raet1c        | 0.752419043 | 0.76897605 | 0.73413897 | 0.7502937 |
| A_55_P1969 | 589.7    | Detected   | 396.9   | Detected   | 512.6    | Detected   | 443.7    | Detected   | Brip1         | 0.752416483 | 0.86925555 | 1.11791383 | 1.2915092 |
| A_66_P1202 | 1736.1   | Detected   | 1543    | Detected   | 1385.3   | Detected   | 1306.2   | Detected   | Cnnm3         | 0.752376015 | 0.79793791 | 0.84653273 | 0.8977965 |
| A_55_P2332 | 105.8    | Detected   | 73.3    | Detected   | 84.6     | Detected   | 79.6     | Detected   | 4930453H23Rik | 0.752362949 | 0.79962193 | 1.08594816 | 1.154161  |
| A_51_P1728 | 11371.2  | Detected   | 9949.4  | Detected   | 15282.7  | Detected   | 8554.4   | Detected   | Cd14          | 0.752286478 | 1.34398304 | 0.85979054 | 1.5360424 |
| A_52_P4037 | 152.5    | Detected   | 63.4    | Detected   | 61.1     | Detected   | 114.7    | Detected   | 4930402H24Rik | 0.752131148 | 0.40065574 | 1.80914826 | 0.9637224 |
| A_51_P2594 | 15428    | Detected   | 12025   | Detected   | 10011.1  | Detected   | 11603.8  | Detected   | Tmem70        | 0.752126005 | 0.64889163 | 0.96497297 | 0.8325239 |
| A_51_P3822 | 3202     | Detected   | 3285.3  | Detected   | 2790.7   | Detected   | 2408.2   | Detected   | Rnf2          | 0.752092442 | 0.87154903 | 0.73302286 | 0.8494506 |
| A_51_P3331 | 34268.7  | Detected   | 28847.6 | Detected   | 24960.5  | Detected   | 25771.4  | Detected   | Rpa1          | 0.752039033 | 0.72837604 | 0.89336375 | 0.865254  |
| A_55_P2232 | 12.5     | Not Detect | 11      | Not Detect | 26.1     | Detected   | 9.4      | Not Detect | AY512915      | 0.752       | 2.088      | 0.85454545 | 2.3727273 |
| A_52_P3619 | 4315.3   | Detected   | 3392.9  | Detected   | 3069     | Detected   | 3245     | Detected   | Zc2hc1a       | 0.751975529 | 0.71119042 | 0.95640897 | 0.9045359 |
| A_55_P2004 | 2598     | Detected   | 1995.1  | Detected   | 2109.4   | Detected   | 1953.2   | Detected   | Iqce          | 0.751809084 | 0.81193226 | 0.97899855 | 1.0572904 |
| A_55_P2062 | 55.6     | Detected   | 39      | Detected   | 38.2     | Detected   | 41.8     | Not Detect | Mfap2         | 0.751798561 | 0.68705036 | 1.07179487 | 0.9794872 |
| A_55_P2127 | 2300.5   | Detected   | 1761.5  | Detected   | 1872.8   | Detected   | 1729.5   | Detected   | Ppp1r21       | 0.751793088 | 0.81408389 | 0.98183366 | 1.0631848 |
| A_52_P3184 | 4630.1   | Detected   | 3975.2  | Detected   | 5042.8   | Detected   | 3480     | Detected   | Nab1          | 0.751603637 | 1.08913414 | 0.87542765 | 1.2685651 |
| A_51_P4293 | 16202    | Detected   | 9507.6  | Detected   | 15257.1  | Detected   | 12175.5  | Detected   | Hes6          | 0.751481299 | 0.94168004 | 1.28060709 | 1.6047267 |
| A_55_P2152 | 7201.6   | Detected   | 5460.8  | Detected   | 5030.5   | Detected   | 5411.7   | Detected   | Tcf19         | 0.751458009 | 0.69852533 | 0.99100864 | 0.921202  |
| A_55_P2142 | 135742.8 | Detected   | 155645  | Detected   | 105645.6 | Detected   | 102004.2 | Detected   | Ywhaq         | 0.751452011 | 0.77827774 | 0.65536445 | 0.67876   |
| A_55_P2180 | 3425.4   | Detected   | 2400.7  | Detected   | 4419.6   | Detected   | 2573.6   | Detected   | Gln5          | 0.751328312 | 1.29024348 | 1.07202066 | 1.8409631 |
| A_66_P1356 | 107.3    | Detected   | 172.3   | Detected   | 224.3    | Detected   | 80.6     | Detected   | Capn9         | 0.751164958 | 2.09040075 | 0.46778874 | 1.3017992 |
| A_55_P2011 | 1614.2   | Detected   | 977.1   | Detected   | 1797     | Detected   | 1212.4   | Detected   | Cdk5rap1      | 0.751084128 | 1.11324495 | 1.24081466 | 1.8391158 |
| A_55_P1965 | 5840.8   | Detected   | 4323.6  | Detected   | 5473.2   | Detected   | 4386.9   | Detected   | 2300009A05Rik | 0.751078619 | 0.93706342 | 1.01464058 | 1.2658895 |
| A_55_P2018 | 5775.7   | Detected   | 3655    | Detected   | 3932.3   | Detected   | 4337.5   | Detected   | Amz2          | 0.750991222 | 0.68083522 | 1.18673051 | 1.0758687 |
| A_52_P3642 | 544.9    | Detected   | 385.4   | Detected   | 534.4    | Detected   | 409.2    | Detected   | Pik3c2a       | 0.75096348  | 0.98073041 | 1.06175402 | 1.3866113 |
| A_52_P6144 | 3515.7   | Detected   | 2338.9  | Detected   | 3453.5   | Detected   | 2638.9   | Detected   | Rpusd1        | 0.750604432 | 0.98230793 | 1.12826542 | 1.4765488 |
| A_55_P1986 | 48.5     | Detected   | 38.3    | Detected   | 41.8     | Detected   | 36.4     | Not Detect | G6bos         | 0.750515464 | 0.86185567 | 0.95039164 | 1.0913838 |
| A_52_P4746 | 581.6    | Detected   | 376.9   | Detected   | 499.6    | Detected   | 436.4    | Detected   | Stk4          | 0.750343879 | 0.85900963 | 1.15786681 | 1.3255505 |
| A_55_P2061 | 4405.3   | Detected   | 3350.8  | Detected   | 2599     | Detected   | 3305.2   | Detected   | Ift74         | 0.750278074 | 0.58997117 | 0.98639131 | 0.7756357 |
| A_55_P2180 | 7441.1   | Detected   | 6521.2  | Detected   | 6444.5   | Detected   | 5582.6   | Detected   | Gls           | 0.75023854  | 0.86606819 | 0.85606944 | 0.9882384 |
| A_51_P2037 | 2263.9   | Detected   | 1982.6  | Detected   | 2609.4   | Detected   | 1698.4   | Detected   | Taf8          | 0.750209815 | 1.15261275 | 0.85665288 | 1.3161505 |
| A_55_P2024 | 25566.8  | Detected   | 14854.8 | Detected   | 19300.8  | Detected   | 19179.4  | Detected   | Dtnbp1        | 0.750168187 | 0.75491653 | 1.29112475 | 1.2992972 |
| A_55_P2124 | 8546.1   | Detected   | 5742.6  | Detected   | 6315.7   | Detected   | 6411     | Detected   | Ambra1        | 0.750166743 | 0.73901546 | 1.11639327 | 1.099798  |
| A_51_P4855 | 2874.9   | Detected   | 1865.3  | Detected   | 1809.4   | Detected   | 2156.5   | Detected   | Tab3          | 0.750113047 | 0.62937841 | 1.1561143  | 0.9700316 |
| A_55_P2130 | 15.6     | Detected   | 11.1    | Not Detect | 19.1     | Detected   | 11.7     | Not Detect | Jakmip1       | 0.75        | 1.22435897 | 1.05405405 | 1.7207207 |
| A_52_P2086 | 12.8     | Not Detect | 17.7    | Detected   | 12       | Not Detect | 9.6      | Not Detect | Cartpt        | 0.75        | 0.9375     | 0.54237288 | 0.6779661 |
| A_55_P2068 | 685.1    | Detected   | 454.5   | Detected   | 604.4    | Detected   | 513.8    | Detected   | 5430401F13Rik | 0.749963509 | 0.88220698 | 1.13047305 | 1.329813  |
| A_55_P1987 | 10455.9  | Detected   | 8221.5  | Detected   | 8046.7   | Detected   | 7840.7   | Detected   | Map4k4        | 0.749882841 | 0.76958464 | 0.95368242 | 0.9787387 |

|            |         |            |         |            |         |            |         |            |               |             |            |            |           |
|------------|---------|------------|---------|------------|---------|------------|---------|------------|---------------|-------------|------------|------------|-----------|
| A_55_P2103 | 27731.2 | Detected   | 17346.3 | Detected   | 22042.9 | Detected   | 20792.8 | Detected   | Slc30a4       | 0.749798061 | 0.79487725 | 1.1986879  | 1.2707551 |
| A_55_P2138 | 7650.9  | Detected   | 4353.4  | Detected   | 5619.6  | Detected   | 5736.3  | Detected   | Lrfr4         | 0.749754931 | 0.73450182 | 1.31765976 | 1.2908531 |
| A_66_P1061 | 2351.1  | Detected   | 1183.5  | Detected   | 1817.4  | Detected   | 1762.7  | Detected   | Magi3         | 0.749734167 | 0.77299987 | 1.48939586 | 1.5356147 |
| A_51_P2249 | 688.3   | Detected   | 650.9   | Detected   | 567.8   | Detected   | 516     | Detected   | BC027231      | 0.749673108 | 0.82493099 | 0.7927485  | 0.8723306 |
| A_55_P1992 | 150.6   | Detected   | 287.7   | Detected   | 109.9   | Detected   | 112.9   | Detected   | A430089I19Rik | 0.749667995 | 0.72974768 | 0.39242266 | 0.3819951 |
| A_55_P2141 | 65.9    | Detected   | 98.9    | Detected   | 35      | Detected   | 49.4    | Not Detect | Ube2l6        | 0.749620637 | 0.53110774 | 0.49949444 | 0.3538928 |
| A_66_P1360 | 124.6   | Detected   | 88.1    | Detected   | 126     | Detected   | 93.4    | Detected   | Nsun7         | 0.749598716 | 1.01123596 | 1.06015891 | 1.430193  |
| A_51_P2404 | 10965.8 | Detected   | 7223.8  | Detected   | 8308.2  | Detected   | 8219.5  | Detected   | Nusap1        | 0.749557716 | 0.7576465  | 1.13783604 | 1.1501149 |
| A_51_P1117 | 1901.4  | Detected   | 1343.3  | Detected   | 1586.5  | Detected   | 1425    | Detected   | Asb1          | 0.749447775 | 0.83438519 | 1.06082037 | 1.1810467 |
| A_55_P2082 | 2738.6  | Detected   | 1562.4  | Detected   | 2305.6  | Detected   | 2052.3  | Detected   | Spin1         | 0.749397502 | 0.84189002 | 1.31355607 | 1.4756784 |
| A_55_P2069 | 9986.2  | Detected   | 10800.8 | Detected   | 10359.8 | Detected   | 7483    | Detected   | Tymp          | 0.749334081 | 1.03741163 | 0.69281905 | 0.9591697 |
| A_55_P1954 | 22767.7 | Detected   | 19632.9 | Detected   | 23531   | Detected   | 17060.3 | Detected   | Snrpc         | 0.749320309 | 1.03352556 | 0.86896485 | 1.1985494 |
| A_55_P2016 | 10841.3 | Detected   | 8164.3  | Detected   | 9609    | Detected   | 8123.5  | Detected   | Xrn2          | 0.749310507 | 0.88633282 | 0.99500263 | 1.1769533 |
| A_51_P3816 | 1877.2  | Detected   | 182.3   | Detected   | 3763.6  | Detected   | 1406.5  | Detected   | Pla1a         | 0.749254208 | 2.00490092 | 7.71530444 | 20.645091 |
| A_55_P2050 | 7917.6  | Detected   | 5761.3  | Detected   | 6779.5  | Detected   | 5931.9  | Detected   | Mtg2          | 0.749204304 | 0.85625695 | 1.02961137 | 1.1767309 |
| A_55_P2154 | 14201.6 | Detected   | 9448.5  | Detected   | 14288.1 | Detected   | 10639.6 | Detected   | Mrpl39        | 0.749183191 | 1.00609086 | 1.12606234 | 1.5122083 |
| A_55_P2051 | 59.8    | Detected   | 52.1    | Detected   | 69.7    | Detected   | 44.8    | Not Detect | Gm11634       | 0.74916388  | 1.16555184 | 0.85988484 | 1.3378119 |
| A_55_P2023 | 43244.5 | Detected   | 39577.6 | Detected   | 42044.8 | Detected   | 32396   | Detected   | Lsm2          | 0.749135728 | 0.97225774 | 0.81854382 | 1.0623383 |
| A_51_P3868 | 17631.3 | Detected   | 17143.3 | Detected   | 21782.4 | Detected   | 13208   | Detected   | Stip1         | 0.7491223   | 1.23543925 | 0.77044676 | 1.2706072 |
| A_55_P2018 | 13213.1 | Detected   | 12782.6 | Detected   | 15919.5 | Detected   | 9897.9  | Detected   | 2410127L17Rik | 0.749097487 | 1.20482703 | 0.77432604 | 1.2454039 |
| A_55_P2176 | 31423.4 | Detected   | 31878.6 | Detected   | 34304.2 | Detected   | 23533.8 | Detected   | Prdx6         | 0.74892596  | 1.0916769  | 0.73823192 | 1.0760887 |
| A_51_P4877 | 685.1   | Detected   | 521.8   | Detected   | 571.3   | Detected   | 512.9   | Detected   | E2f3          | 0.748649832 | 0.83389286 | 0.98294366 | 1.0948639 |
| A_55_P2113 | 17.9    | Detected   | 13.8    | Not Detect | 11.2    | Not Detect | 13.4    | Not Detect | Foxo4         | 0.748603352 | 0.62569832 | 0.97101449 | 0.8115942 |
| A_51_P4398 | 10210.9 | Detected   | 9409.4  | Detected   | 5666.1  | Detected   | 7642.9  | Detected   | Map4k4        | 0.74850405  | 0.55490701 | 0.81226221 | 0.6021744 |
| A_55_P2025 | 144.7   | Detected   | 88.6    | Detected   | 122.8   | Detected   | 108.3   | Detected   | Arhgap6       | 0.748445059 | 0.84865238 | 1.22234763 | 1.3860045 |
| A_55_P2035 | 10869   | Detected   | 10003.9 | Detected   | 9182.3  | Detected   | 8134.2  | Detected   | Arhgef15      | 0.748385316 | 0.84481553 | 0.81310289 | 0.917872  |
| A_55_P1992 | 10412.8 | Detected   | 7460.3  | Detected   | 8059.4  | Detected   | 7792    | Detected   | Armc10        | 0.748309773 | 0.7739897  | 1.04446202 | 1.0803051 |
| A_51_P4237 | 614.9   | Detected   | 961.4   | Detected   | 49      | Detected   | 460.1   | Detected   | Fam84a        | 0.748251748 | 0.07968775 | 0.47857291 | 0.0509673 |
| A_55_P1960 | 8550.9  | Detected   | 5698.6  | Detected   | 8198.1  | Detected   | 6398.1  | Detected   | Cd151         | 0.748237028 | 0.95874119 | 1.12274945 | 1.4386165 |
| A_52_P6031 | 182.3   | Detected   | 144.6   | Detected   | 152.5   | Detected   | 136.4   | Detected   | Sufu          | 0.748217224 | 0.83653319 | 0.94329184 | 1.0546335 |
| A_55_P2061 | 3914.2  | Detected   | 2964.2  | Detected   | 3332    | Detected   | 2928.6  | Detected   | Ppp1r21       | 0.748198866 | 0.85125952 | 0.98799001 | 1.1240807 |
| A_52_P3063 | 4702.4  | Detected   | 3935    | Detected   | 4131.7  | Detected   | 3518.3  | Detected   | Ppp3cb        | 0.748192412 | 0.87863644 | 0.89410419 | 1.0499873 |
| A_55_P2043 | 32606.4 | Detected   | 19598.8 | Detected   | 17131.7 | Detected   | 24392.9 | Detected   | Stmn1         | 0.7481016   | 0.52540912 | 1.24461192 | 0.8741198 |
| A_55_P2021 | 28481.5 | Detected   | 16348.2 | Detected   | 21715.6 | Detected   | 21306.4 | Detected   | Phldb2        | 0.748078577 | 0.7624458  | 1.30328721 | 1.3283175 |
| A_55_P2077 | 34535.2 | Detected   | 18265.9 | Detected   | 21289.6 | Detected   | 25833.7 | Detected   | Cenpb         | 0.748039681 | 0.61646089 | 1.41431301 | 1.165538  |
| A_66_P1015 | 12.7    | Not Detect | 20.5    | Detected   | 3.4     | Not Detect | 9.5     | Not Detect | Gm2176        | 0.748031496 | 0.26771654 | 0.46341463 | 0.1658537 |
| A_55_P1980 | 716.2   | Detected   | 465.6   | Detected   | 480     | Detected   | 535.7   | Detected   | Tmem189       | 0.747975426 | 0.67020385 | 1.15055842 | 1.0309278 |
| A_52_P2093 | 15625.2 | Detected   | 9694.2  | Detected   | 10957.6 | Detected   | 11686.3 | Detected   | Snx12         | 0.747913627 | 0.70127742 | 1.20549401 | 1.1303253 |
| A_55_P1992 | 1880    | Detected   | 1568.8  | Detected   | 973.2   | Detected   | 1405.9  | Detected   | Simc1         | 0.747819149 | 0.51765957 | 0.89616267 | 0.6203468 |
| A_55_P2070 | 21783.4 | Detected   | 14190.3 | Detected   | 15921.1 | Detected   | 16288.3 | Detected   | Caprin1       | 0.747739104 | 0.73088223 | 1.14784747 | 1.1219706 |

|            |         |            |         |            |         |            |         |            |               |              |            |            |           |
|------------|---------|------------|---------|------------|---------|------------|---------|------------|---------------|--------------|------------|------------|-----------|
| A_55_P1976 | 10748.3 | Detected   | 6360.4  | Detected   | 10139.2 | Detected   | 8036.4  | Detected   | Dgcr6         | 0.747690332  | 0.94333057 | 1.26350544 | 1.5941136 |
| A_55_P1981 | 52.7    | Detected   | 55.5    | Detected   | 42.3    | Detected   | 39.4    | Not Detect | Il24          | 0.747628083  | 0.80265655 | 0.70990991 | 0.7621622 |
| A_55_P1990 | 103802  | Detected   | 69454.6 | Detected   | 97958.9 | Detected   | 77599.6 | Detected   | Ube2v1        | 0.747573264  | 0.94370918 | 1.11727085 | 1.4104019 |
| A_51_P2099 | 1420.4  | Detected   | 1114.5  | Detected   | 1502.8  | Detected   | 1061.7  | Detected   | Rtn2          | 0.747465503  | 1.05801183 | 0.9526245  | 1.3484074 |
| A_51_P4285 | 110.4   | Detected   | 56.9    | Detected   | 81.5    | Detected   | 82.5    | Detected   | Cspp1         | 0.747282609  | 0.73822464 | 1.44991213 | 1.4323374 |
| A_52_P6619 | 2193.5  | Detected   | 1713.2  | Detected   | 1808.1  | Detected   | 1638.9  | Detected   | Fbxo11        | 0.74716207   | 0.82429907 | 0.95663087 | 1.0553934 |
| A_55_P2007 | 95.7    | Detected   | 117.9   | Detected   | 77      | Detected   | 71.5    | Detected   | Zscan4c       | 0.747126437  | 0.8045977  | 0.60644614 | 0.6530958 |
| A_52_P3762 | 852.1   | Detected   | 740.7   | Detected   | 640.2   | Detected   | 636.6   | Detected   | Nrf1          | 0.747095411  | 0.75132027 | 0.85945727 | 0.8643175 |
| A_55_P2034 | 4738.5  | Detected   | 2899.8  | Detected   | 3227.6  | Detected   | 3540    | Detected   | LOC100861651  | 0.747071858  | 0.68114382 | 1.22077385 | 1.1130423 |
| A_52_P6780 | 3255.9  | Detected   | 1708.5  | Detected   | 3951.2  | Detected   | 2431.8  | Detected   | Eva1b         | 0.746890261  | 1.21355078 | 1.42335382 | 2.3126719 |
| A_51_P1171 | 119.7   | Detected   | 100.7   | Detected   | 71.7    | Detected   | 89.4    | Detected   | Olf1r53       | 0.746867168  | 0.59899749 | 0.8877855  | 0.7120159 |
| A_51_P3416 | 1248.7  | Detected   | 752.7   | Detected   | 1050.9  | Detected   | 932.5   | Detected   | Zfp87         | 0.746776648  | 0.84159526 | 1.23887339 | 1.3961738 |
| A_55_P2066 | 115.7   | Detected   | 55      | Detected   | 74.8    | Detected   | 86.4    | Detected   | Hoxa9         | 0.746758859  | 0.64649957 | 1.57090909 | 1.36      |
| A_55_P2406 | 22.5    | Detected   | 10.6    | Not Detect | 12.7    | Not Detect | 16.8    | Not Detect | Tuba-rs1      | 0.746666667  | 0.56444444 | 1.58490566 | 1.1981132 |
| A_52_P4883 | 780     | Detected   | 728.3   | Detected   | 653.4   | Detected   | 582.4   | Detected   | Tmem110       | 0.746666667  | 0.83769231 | 0.79967047 | 0.8971578 |
| A_55_P2169 | 15      | Not Detect | 20.1    | Detected   | 16.9    | Not Detect | 11.2    | Not Detect | Cep128        | 0.746666667  | 1.12666667 | 0.55721393 | 0.840796  |
| A_55_P2065 | 1311.3  | Detected   | 770.9   | Detected   | 764.2   | Detected   | 979.1   | Detected   | Camsap1       | 0.7466663616 | 0.58278045 | 1.27007394 | 0.9913089 |
| A_55_P2069 | 740     | Detected   | 639.9   | Detected   | 602.2   | Detected   | 552.5   | Detected   | Ubxn7         | 0.746621622  | 0.81378378 | 0.86341616 | 0.9410845 |
| A_55_P2039 | 26469.2 | Detected   | 21811.4 | Detected   | 24425   | Detected   | 19758.9 | Detected   | Ccnf          | 0.746486482  | 0.92277062 | 0.90589783 | 1.1198272 |
| A_55_P2009 | 10384.7 | Detected   | 6115.5  | Detected   | 7839.3  | Detected   | 7752    | Detected   | Ocrl          | 0.746482806  | 0.7548894  | 1.26759872 | 1.2818739 |
| A_51_P5180 | 1992.7  | Detected   | 1069.1  | Detected   | 1498    | Detected   | 1487.3  | Detected   | Dusp4         | 0.746374266  | 0.75174387 | 1.39117014 | 1.4011786 |
| A_51_P2006 | 5283.9  | Detected   | 3449.3  | Detected   | 4332.4  | Detected   | 3943.7  | Detected   | Zbtb12        | 0.746361589  | 0.81992468 | 1.14333343 | 1.256023  |
| A_55_P2081 | 359.5   | Detected   | 446.4   | Detected   | 265     | Detected   | 268.3   | Detected   | Nxn           | 0.746314325  | 0.73713491 | 0.60103047 | 0.593638  |
| A_51_P1023 | 1132.9  | Detected   | 884.1   | Detected   | 1057.9  | Detected   | 845.3   | Detected   | Zbtb41        | 0.746138229  | 0.93379822 | 0.95611356 | 1.1965841 |
| A_55_P2053 | 51.6    | Detected   | 49      | Detected   | 46.7    | Detected   | 38.5    | Not Detect | Gm10632       | 0.746124031  | 0.90503876 | 0.78571429 | 0.9530612 |
| A_55_P1954 | 19.3    | Detected   | 21.7    | Detected   | 23      | Detected   | 14.4    | Not Detect | 5430417L22Rik | 0.74611399   | 1.19170984 | 0.66359447 | 1.0599078 |
| A_55_P1988 | 262.3   | Detected   | 258.5   | Detected   | 206     | Detected   | 195.7   | Detected   | Mdm1          | 0.746092261  | 0.78536027 | 0.75705996 | 0.7969052 |
| A_55_P2095 | 1412.2  | Detected   | 1175.6  | Detected   | 368.8   | Detected   | 1053.6  | Detected   | Nfix          | 0.746069962  | 0.26115281 | 0.89622321 | 0.3137121 |
| A_55_P2327 | 18.9    | Detected   | 22.8    | Detected   | 27.4    | Detected   | 14.1    | Not Detect | 4931431B13Rik | 0.746031746  | 1.44973545 | 0.61842105 | 1.2017544 |
| A_55_P2145 | 12.6    | Not Detect | 21.5    | Detected   | 3.4     | Not Detect | 9.4     | Not Detect | Dmpk          | 0.746031746  | 0.26984127 | 0.4372093  | 0.1581395 |
| A_51_P1432 | 18.1    | Detected   | 24.7    | Detected   | 15.5    | Not Detect | 13.5    | Not Detect | Tcstv3        | 0.745856354  | 0.85635359 | 0.5465587  | 0.6275304 |
| A_55_P2071 | 2879.9  | Detected   | 2339.5  | Detected   | 2280.5  | Detected   | 2147.9  | Detected   | Silp          | 0.745824508  | 0.79186777 | 0.91810216 | 0.9747809 |
| A_55_P1985 | 40.5    | Detected   | 55.4    | Detected   | 33.2    | Detected   | 30.2    | Not Detect | Man1c1        | 0.745679012  | 0.81975309 | 0.54512635 | 0.599278  |
| A_51_P4668 | 6421.2  | Detected   | 4816.9  | Detected   | 7247.8  | Detected   | 4787.8  | Detected   | Fam109a       | 0.745623871  | 1.12872983 | 0.99395877 | 1.5046607 |
| A_52_P4966 | 139.1   | Detected   | 188     | Detected   | 137.5   | Detected   | 103.7   | Detected   | 2700081O15Rik | 0.74550683   | 0.98849748 | 0.55159574 | 0.731383  |
| A_51_P3306 | 2470.9  | Detected   | 1553.9  | Detected   | 2806.5  | Detected   | 1841.9  | Detected   | Usp3          | 0.745436885  | 1.13582096 | 1.18534011 | 1.8061008 |
| A_55_P2045 | 292.6   | Detected   | 220.7   | Detected   | 214.5   | Detected   | 218.1   | Detected   | Hjrp          | 0.745386193  | 0.73308271 | 0.9882193  | 0.9719076 |
| A_55_P2064 | 1610.9  | Detected   | 1021.8  | Detected   | 1427.3  | Detected   | 1200.7  | Detected   | Rhot2         | 0.745359737  | 0.88602644 | 1.17508319 | 1.3968487 |
| A_55_P2031 | 2018    | Detected   | 1496.9  | Detected   | 1720.6  | Detected   | 1504.1  | Detected   | Ahcy          | 0.745341923  | 0.85262636 | 1.00480994 | 1.1494422 |
| A_55_P2042 | 115.4   | Detected   | 93.7    | Detected   | 125.8   | Detected   | 86      | Detected   | Pthr1         | 0.745233969  | 1.09012132 | 0.91782284 | 1.3425827 |

|            |         |          |         |            |         |            |         |            |               |             |            |            |           |
|------------|---------|----------|---------|------------|---------|------------|---------|------------|---------------|-------------|------------|------------|-----------|
| A_51_P4768 | 17517.3 | Detected | 12902.2 | Detected   | 15384.9 | Detected   | 13054.4 | Detected   | Fance         | 0.745229002 | 0.87826891 | 1.01179644 | 1.1924245 |
| A_66_P1219 | 355.5   | Detected | 414.1   | Detected   | 181.1   | Detected   | 264.9   | Detected   | Slc4a11       | 0.745147679 | 0.50942335 | 0.63970056 | 0.437334  |
| A_55_P2094 | 21191.1 | Detected | 18481.7 | Detected   | 16308.9 | Detected   | 15785.3 | Detected   | Ralgps1       | 0.744902341 | 0.76961083 | 0.85410433 | 0.8824351 |
| A_51_P2992 | 4217.1  | Detected | 2268.1  | Detected   | 3044.9  | Detected   | 3140.7  | Detected   | Wdr90         | 0.744753504 | 0.72203647 | 1.3847273  | 1.3424893 |
| A_55_P2143 | 3066.5  | Detected | 1972.1  | Detected   | 2796.9  | Detected   | 2283.2  | Detected   | LOC628147     | 0.744562204 | 0.91208218 | 1.15775062 | 1.4182344 |
| A_52_P4110 | 35.2    | Detected | 33.1    | Detected   | 36.1    | Detected   | 26.2    | Not Detect | Pdpr          | 0.744318182 | 1.02556818 | 0.79154079 | 1.0906344 |
| A_55_P2082 | 117.3   | Detected | 65.8    | Detected   | 101.2   | Detected   | 87.3    | Detected   | Gabbr1        | 0.744245524 | 0.8627451  | 1.32674772 | 1.5379939 |
| A_55_P2185 | 69206.4 | Detected | 52045.8 | Detected   | 59564.6 | Detected   | 51506   | Detected   | Umps          | 0.744237527 | 0.86068052 | 0.98962837 | 1.1444651 |
| A_51_P2682 | 207.6   | Detected | 553.5   | Detected   | 299.3   | Detected   | 154.5   | Detected   | Il34          | 0.744219653 | 1.44171484 | 0.27913279 | 0.5407407 |
| A_52_P4803 | 1874.5  | Detected | 1305.4  | Detected   | 1753.5  | Detected   | 1395    | Detected   | Sppl3         | 0.744198453 | 0.93544945 | 1.06863797 | 1.3432664 |
| A_52_P2785 | 29.3    | Detected | 41.5    | Detected   | 13.9    | Not Detect | 21.8    | Not Detect | Zbtb1         | 0.744027304 | 0.47440273 | 0.5253012  | 0.3349398 |
| A_55_P1953 | 7011.2  | Detected | 3714    | Detected   | 8663.5  | Detected   | 5216.5  | Detected   | Sord          | 0.744023848 | 1.23566579 | 1.40455035 | 2.3326602 |
| A_55_P2106 | 58.2    | Detected | 45.1    | Detected   | 3.8     | Not Detect | 43.3    | Not Detect | Gm2042        | 0.743986254 | 0.0652921  | 0.96008869 | 0.0842572 |
| A_55_P2023 | 36308.4 | Detected | 25720.6 | Detected   | 38295.2 | Detected   | 27011.3 | Detected   | Fam107b       | 0.743940796 | 1.05472012 | 1.05018157 | 1.4888922 |
| A_55_P2022 | 22040.8 | Detected | 27690.1 | Detected   | 20437.3 | Detected   | 16396.5 | Detected   | Nxn           | 0.743915829 | 0.92724856 | 0.59214304 | 0.7380725 |
| A_51_P2113 | 7835.6  | Detected | 6868.9  | Detected   | 6248.4  | Detected   | 5828.6  | Detected   | Eif3j1        | 0.743861351 | 0.79743734 | 0.84854926 | 0.9096653 |
| A_55_P2296 | 1191.7  | Detected | 920.8   | Detected   | 1005.6  | Detected   | 886.4   | Detected   | Sp3           | 0.743811362 | 0.84383654 | 0.96264118 | 1.0920938 |
| A_51_P4007 | 14678.3 | Detected | 9610.8  | Detected   | 12364.5 | Detected   | 10917   | Detected   | Hdgfrp2       | 0.743750979 | 0.84236594 | 1.1359096  | 1.2865214 |
| A_51_P3323 | 3634.7  | Detected | 2871    | Detected   | 2511    | Detected   | 2703.3  | Detected   | Kif18a        | 0.743747765 | 0.69084106 | 0.9415883  | 0.8746082 |
| A_66_P1265 | 97.5    | Detected | 225.7   | Detected   | 72.8    | Detected   | 72.5    | Detected   | Gm7963        | 0.743589744 | 0.74666667 | 0.32122286 | 0.3225521 |
| A_55_P1956 | 34.3    | Detected | 38.8    | Detected   | 26      | Detected   | 25.5    | Not Detect | 1700101E01Rik | 0.743440233 | 0.75801749 | 0.65721649 | 0.6701031 |
| A_55_P2035 | 11301.5 | Detected | 3870.6  | Detected   | 4806.4  | Detected   | 8401.5  | Detected   | Rasgef1b      | 0.743396894 | 0.42528868 | 2.17059371 | 1.2417713 |
| A_66_P1309 | 217.4   | Detected | 188.6   | Detected   | 205.1   | Detected   | 161.6   | Detected   | Dcaf7         | 0.743330267 | 0.94342226 | 0.85683987 | 1.0874867 |
| A_55_P2111 | 287.1   | Detected | 382.4   | Detected   | 296.5   | Detected   | 213.4   | Detected   | Trmt10a       | 0.743295019 | 1.03274121 | 0.55805439 | 0.7753661 |
| A_55_P2007 | 273.8   | Detected | 467.7   | Detected   | 234.7   | Detected   | 203.5   | Detected   | Zscan4f       | 0.743243243 | 0.85719503 | 0.43510798 | 0.5018174 |
| A_52_P4592 | 746.5   | Detected | 487.7   | Detected   | 495.4   | Detected   | 554.8   | Detected   | Ift81         | 0.743201608 | 0.66363027 | 1.13758458 | 1.0157884 |
| A_55_P2182 | 466.8   | Detected | 285.1   | Detected   | 378.8   | Detected   | 346.9   | Detected   | Cacng6        | 0.743144816 | 0.81148243 | 1.21676605 | 1.3286566 |
| A_55_P2036 | 13541.7 | Detected | 16317.9 | Detected   | 14695.6 | Detected   | 10063.2 | Detected   | Dis3          | 0.743126786 | 1.08521087 | 0.616697   | 0.9005816 |
| A_55_P1992 | 5909.5  | Detected | 3952.5  | Detected   | 4658.7  | Detected   | 4390.2  | Detected   | Dsn1          | 0.742905491 | 0.78834081 | 1.11074004 | 1.1786717 |
| A_55_P2087 | 3383.3  | Detected | 1836.2  | Detected   | 3160.1  | Detected   | 2513.4  | Detected   | Slc25a10      | 0.742884166 | 0.93402891 | 1.36880514 | 1.7209999 |
| A_51_P4333 | 17.1    | Detected | 10.2    | Not Detect | 6.5     | Not Detect | 12.7    | Not Detect | 1700019A02Rik | 0.742690058 | 0.38011696 | 1.24509804 | 0.6372549 |
| A_52_P2227 | 16317.9 | Detected | 12170.7 | Detected   | 12371.4 | Detected   | 12118.6 | Detected   | Lims1         | 0.742656837 | 0.75814903 | 0.99571923 | 1.0164904 |
| A_66_P1074 | 43.9    | Detected | 28.8    | Detected   | 23      | Detected   | 32.6    | Not Detect | Arhgef33      | 0.742596811 | 0.523918   | 1.13194444 | 0.7986111 |
| A_55_P1989 | 493     | Detected | 485.1   | Detected   | 427.9   | Detected   | 366.1   | Detected   | Oas1d         | 0.742596349 | 0.86795132 | 0.75468975 | 0.8820862 |
| A_51_P3673 | 23798.1 | Detected | 13398.2 | Detected   | 23893.2 | Detected   | 17669.4 | Detected   | Chaf1b        | 0.742471038 | 1.00399612 | 1.31878909 | 1.7833142 |
| A_55_P2086 | 13784.5 | Detected | 10685.9 | Detected   | 9720.1  | Detected   | 10234.4 | Detected   | Atxn2         | 0.742457108 | 0.70514709 | 0.95774806 | 0.9096192 |
| A_52_P1747 | 4520.3  | Detected | 2916.8  | Detected   | 3715.4  | Detected   | 3356    | Detected   | Ripk1         | 0.7424286   | 0.8219366  | 1.15057597 | 1.2737932 |
| A_55_P2078 | 1829.3  | Detected | 1347.3  | Detected   | 1451.2  | Detected   | 1358    | Detected   | Ppp1r10       | 0.742360466 | 0.79330892 | 1.00794181 | 1.0771172 |
| A_55_P2029 | 2038.2  | Detected | 1316.9  | Detected   | 1524    | Detected   | 1513    | Detected   | Osbpl1a       | 0.742321656 | 0.74771858 | 1.14891032 | 1.1572633 |
| A_52_P3999 | 1282.2  | Detected | 1288.7  | Detected   | 663.1   | Detected   | 951.5   | Detected   | B4galt2       | 0.742083918 | 0.51715801 | 0.73834096 | 0.5145495 |

|            |          |          |         |          |         |            |         |            |               |             |            |            |           |
|------------|----------|----------|---------|----------|---------|------------|---------|------------|---------------|-------------|------------|------------|-----------|
| A_55_P1997 | 818      | Detected | 1036.4  | Detected | 673.1   | Detected   | 607     | Detected   | Adamtsl5      | 0.74205379  | 0.82286064 | 0.5856812  | 0.6494597 |
| A_55_P2213 | 69       | Detected | 45.5    | Detected | 49.7    | Detected   | 51.2    | Detected   | LOC269472     | 0.742028986 | 0.72028986 | 1.12527473 | 1.0923077 |
| A_55_P2130 | 219      | Detected | 567.8   | Detected | 73.9    | Detected   | 162.5   | Detected   | Dnmt3b        | 0.742009132 | 0.33744292 | 0.28619232 | 0.1301515 |
| A_55_P2136 | 30445.3  | Detected | 16852.4 | Detected | 24700.5 | Detected   | 22587.7 | Detected   | Wbp11         | 0.741910903 | 0.81130749 | 1.34032541 | 1.4656963 |
| A_55_P2030 | 5962.8   | Detected | 5136.5  | Detected | 4423.8  | Detected   | 4422.8  | Detected   | Fnbp1         | 0.741732072 | 0.74189978 | 0.86105325 | 0.8612479 |
| A_55_P2148 | 14658.8  | Detected | 15866.1 | Detected | 15752.9 | Detected   | 10872.4 | Detected   | Wdr12         | 0.74169782  | 1.07463776 | 0.68525977 | 0.9928653 |
| A_55_P2183 | 3014.1   | Detected | 2058.8  | Detected | 1857.8  | Detected   | 2235.1  | Detected   | Fmr1          | 0.741548057 | 0.61636973 | 1.08563241 | 0.9023703 |
| A_55_P2098 | 1608.8   | Detected | 1288.5  | Detected | 1141.9  | Detected   | 1193    | Detected   | Map2k4        | 0.741546494 | 0.70978369 | 0.92588281 | 0.8862243 |
| A_55_P2184 | 14.7     | Detected | 20.2    | Detected | 34.6    | Detected   | 10.9    | Not Detect | Dnah7a        | 0.741496599 | 2.3537415  | 0.53960396 | 1.7128713 |
| A_55_P2234 | 111.4    | Detected | 115.6   | Detected | 13.9    | Not Detect | 82.6    | Detected   | 3110027N22Rik | 0.741472172 | 0.12477558 | 0.71453287 | 0.1202422 |
| A_55_P2113 | 23874.7  | Detected | 15942.1 | Detected | 22009.2 | Detected   | 17701.8 | Detected   | Wash          | 0.741445966 | 0.92186289 | 1.11038069 | 1.3805709 |
| A_52_P6468 | 1480.1   | Detected | 249.7   | Detected | 2051.2  | Detected   | 1097.2  | Detected   | Camk2n1       | 0.741301263 | 1.38585231 | 4.39407289 | 8.2146576 |
| A_55_P2147 | 126      | Detected | 78.2    | Detected | 104.4   | Detected   | 93.4    | Detected   | Zfp712        | 0.741269841 | 0.82857143 | 1.1943734  | 1.3350384 |
| A_52_P6672 | 505.5    | Detected | 342.1   | Detected | 349.6   | Detected   | 374.7   | Detected   | Cers6         | 0.741246291 | 0.69159248 | 1.09529377 | 1.0219234 |
| A_51_P3817 | 53320.4  | Detected | 39336.4 | Detected | 45787.3 | Detected   | 39519.1 | Detected   | Slmo2         | 0.741162857 | 0.85872011 | 1.00464455 | 1.1639931 |
| A_55_P2040 | 30.9     | Detected | 25      | Detected | 21.9    | Detected   | 22.9    | Not Detect | Gm6880        | 0.741100324 | 0.70873786 | 0.916      | 0.876     |
| A_55_P2148 | 288.1    | Detected | 280.4   | Detected | 190.6   | Detected   | 213.5   | Detected   | Foxred2       | 0.741062131 | 0.66157584 | 0.76141227 | 0.6797432 |
| A_55_P1974 | 9762.2   | Detected | 8897.2  | Detected | 8165.6  | Detected   | 7233.5  | Detected   | Kat2a         | 0.740970273 | 0.8364508  | 0.81300859 | 0.9177719 |
| A_66_P1164 | 35.9     | Detected | 125.8   | Detected | 16.8    | Detected   | 26.6    | Not Detect | Flt3          | 0.740947075 | 0.46796657 | 0.21144674 | 0.1335453 |
| A_52_P5588 | 16655.7  | Detected | 11916.1 | Detected | 10535.4 | Detected   | 12340   | Detected   | Rras2         | 0.740887504 | 0.63254021 | 1.03557372 | 0.8841316 |
| A_55_P1954 | 18903.1  | Detected | 21041.5 | Detected | 19343.5 | Detected   | 14002.4 | Detected   | Wdr43         | 0.740746227 | 1.02329777 | 0.66546587 | 0.9193023 |
| A_55_P1959 | 541.3    | Detected | 444.3   | Detected | 404.5   | Detected   | 400.9   | Detected   | Gm10324       | 0.740624423 | 0.74727508 | 0.90231825 | 0.9104209 |
| A_55_P2336 | 34.3     | Detected | 22.4    | Detected | 26.4    | Detected   | 25.4    | Not Detect | 4933404K13Rik | 0.740524781 | 0.7696793  | 1.13392857 | 1.1785714 |
| A_51_P2105 | 18114.7  | Detected | 16855.4 | Detected | 13887.7 | Detected   | 13413.6 | Detected   | Pptc7         | 0.740481487 | 0.7666536  | 0.79580431 | 0.8239318 |
| A_55_P2156 | 3045.8   | Detected | 2388.5  | Detected | 2868.3  | Detected   | 2255    | Detected   | Nt5c3b        | 0.74036378  | 0.94172303 | 0.94410718 | 1.2008792 |
| A_55_P2087 | 370.9    | Detected | 319.7   | Detected | 242.2   | Detected   | 274.6   | Detected   | Sema3e        | 0.740361283 | 0.6530062  | 0.85893025 | 0.7575852 |
| A_55_P1974 | 3786.7   | Detected | 2814.9  | Detected | 3797.9  | Detected   | 2803.5  | Detected   | Sumf2         | 0.740354398 | 1.00295772 | 0.99595012 | 1.3492131 |
| A_55_P2064 | 165.6    | Detected | 129     | Detected | 61.1    | Detected   | 122.6   | Detected   | Lrrcc1        | 0.740338164 | 0.36896135 | 0.9503876  | 0.4736434 |
| A_51_P3364 | 52913.2  | Detected | 45752.2 | Detected | 48188.8 | Detected   | 39171   | Detected   | Emc7          | 0.740287868 | 0.91071415 | 0.85615555 | 1.0532565 |
| A_55_P2182 | 2346.4   | Detected | 1704.2  | Detected | 1970.5  | Detected   | 1736.8  | Detected   | Prkab1        | 0.74019775  | 0.83979714 | 1.01912921 | 1.156261  |
| A_51_P1580 | 565.8    | Detected | 205.5   | Detected | 294.4   | Detected   | 418.8   | Detected   | Wipi1         | 0.74019088  | 0.5203252  | 2.0379562  | 1.4326034 |
| A_55_P2046 | 384.4    | Detected | 303.3   | Detected | 330     | Detected   | 284.5   | Detected   | Zfp81         | 0.740114464 | 0.85848075 | 0.93801517 | 1.0880317 |
| A_55_P1978 | 2999.3   | Detected | 2295.8  | Detected | 1862.6  | Detected   | 2219.8  | Detected   | Tnlp2         | 0.740106025 | 0.62101157 | 0.96689607 | 0.8113076 |
| A_55_P2348 | 195.8    | Detected | 161.4   | Detected | 180.5   | Detected   | 144.9   | Detected   | B130052P14Rik | 0.740040858 | 0.92185904 | 0.89776952 | 1.1183395 |
| A_66_P1025 | 547.2    | Detected | 514     | Detected | 320.1   | Detected   | 404.9   | Detected   | Tspan5        | 0.73994883  | 0.58497807 | 0.78774319 | 0.6227626 |
| A_51_P2618 | 59.6     | Detected | 53      | Detected | 49.4    | Detected   | 44.1    | Not Detect | Olfcr3        | 0.739932886 | 0.82885906 | 0.83207547 | 0.9320755 |
| A_55_P1991 | 22.3     | Detected | 18.7    | Detected | 19.2    | Detected   | 16.5    | Not Detect | Zfand5        | 0.739910314 | 0.86098655 | 0.88235294 | 1.026738  |
| A_66_P1084 | 387.5    | Detected | 264.4   | Detected | 314.9   | Detected   | 286.7   | Detected   | Zdhc5         | 0.739870968 | 0.81264516 | 1.08434191 | 1.1909985 |
| A_55_P2073 | 455.1    | Detected | 307.1   | Detected | 354.8   | Detected   | 336.7   | Detected   | Ndufb11       | 0.739837398 | 0.77960888 | 1.09638554 | 1.155324  |
| A_55_P2006 | 101239.6 | Detected | 62338.7 | Detected | 97684   | Detected   | 74887.7 | Detected   | Serf2         | 0.739707585 | 0.96487936 | 1.20130352 | 1.5669881 |



|            |          |            |          |            |          |            |          |            |               |             |            |            |           |
|------------|----------|------------|----------|------------|----------|------------|----------|------------|---------------|-------------|------------|------------|-----------|
| A_52_P2181 | 17881.6  | Detected   | 12515.7  | Detected   | 13461.3  | Detected   | 13226.9  | Detected   | Zdhc5         | 0.739693316 | 0.75280176 | 1.05682463 | 1.0755531 |
| A_55_P1982 | 16.9     | Detected   | 10.4     | Not Detect | 9.1      | Not Detect | 12.5     | Not Detect | Scara5        | 0.73964497  | 0.53846154 | 1.20192308 | 0.875     |
| A_51_P4692 | 1125.1   | Detected   | 701.8    | Detected   | 773.8    | Detected   | 832.1    | Detected   | Nrp1          | 0.739578704 | 0.68776109 | 1.18566543 | 1.1025933 |
| A_55_P2144 | 21.5     | Detected   | 50.5     | Detected   | 21.7     | Detected   | 15.9     | Not Detect | Gm10386       | 0.739534884 | 1.00930233 | 0.31485149 | 0.429703  |
| A_51_P1752 | 457.4    | Detected   | 428.4    | Detected   | 397.2    | Detected   | 338.2    | Detected   | Fbxl18        | 0.739396589 | 0.86838653 | 0.78944911 | 0.9271709 |
| A_55_P2069 | 57062.7  | Detected   | 37305.5  | Detected   | 46117.2  | Detected   | 42191.1  | Detected   | Dynlr1b1      | 0.739381417 | 0.80818468 | 1.13096192 | 1.2362038 |
| A_55_P1990 | 25711.4  | Detected   | 17839.3  | Detected   | 23890.4  | Detected   | 19009.6  | Detected   | Ergic3        | 0.739345193 | 0.92917539 | 1.06560235 | 1.3392005 |
| A_52_P5884 | 2489.8   | Detected   | 342.4    | Detected   | 2946.6   | Detected   | 1840.6   | Detected   | Fbln1         | 0.739256165 | 1.18346855 | 5.37558411 | 8.6057243 |
| A_55_P2101 | 12344    | Detected   | 6307.7   | Detected   | 13483.6  | Detected   | 9124.1   | Detected   | Smad3         | 0.739152625 | 1.09232016 | 1.44650189 | 2.1376413 |
| A_55_P2053 | 13.8     | Not Detect | 18.9     | Detected   | 9.4      | Not Detect | 10.2     | Not Detect | Gm10474       | 0.739130435 | 0.68115942 | 0.53968254 | 0.4973545 |
| A_52_P4886 | 2458     | Detected   | 1872.8   | Detected   | 2399     | Detected   | 1816.2   | Detected   | Btb9          | 0.738893409 | 0.97599675 | 0.96977787 | 1.2809697 |
| A_52_P3525 | 146755.3 | Detected   | 125025.9 | Detected   | 129015.4 | Detected   | 108413.9 | Detected   | 1700073E17Rik | 0.738739248 | 0.87911919 | 0.86713153 | 1.0319094 |
| A_52_P4567 | 973.6    | Detected   | 905.6    | Detected   | 915.1    | Detected   | 719.2    | Detected   | Aph1b         | 0.738701726 | 0.93991372 | 0.79416961 | 1.0104903 |
| A_55_P2462 | 830.7    | Detected   | 494.5    | Detected   | 571.5    | Detected   | 613.6    | Detected   | Taf1          | 0.738654147 | 0.687974   | 1.24084934 | 1.1557128 |
| A_55_P2078 | 475.9    | Detected   | 1397     | Detected   | 802.9    | Detected   | 351.4    | Detected   | Cbs           | 0.738390418 | 1.68711914 | 0.25153901 | 0.5747316 |
| A_55_P2016 | 15010    | Detected   | 9769     | Detected   | 11419.2  | Detected   | 11082.8  | Detected   | LOC101056451  | 0.738361093 | 0.76077282 | 1.13448664 | 1.1689221 |
| A_55_P1997 | 1337.7   | Detected   | 657.8    | Detected   | 1016.9   | Detected   | 987.6    | Detected   | Tfeb          | 0.738282126 | 0.76018539 | 1.5013682  | 1.5459106 |
| A_52_P4631 | 1970.3   | Detected   | 1723.1   | Detected   | 1721.4   | Detected   | 1454.4   | Detected   | Asap1         | 0.738161701 | 0.87367406 | 0.84406012 | 0.9990134 |
| A_55_P1953 | 75426.5  | Detected   | 76691.9  | Detected   | 72015.5  | Detected   | 55673.4  | Detected   | Mcm3          | 0.738114588 | 0.95477717 | 0.72593586 | 0.9390235 |
| A_66_P1108 | 1754.5   | Detected   | 1318.6   | Detected   | 1569.4   | Detected   | 1295     | Detected   | Mterfd1       | 0.738102023 | 0.89449986 | 0.98210223 | 1.1902017 |
| A_51_P4673 | 96.6     | Detected   | 33.1     | Detected   | 78.9     | Detected   | 71.3     | Detected   | Muc1          | 0.738095238 | 0.81677019 | 2.15407855 | 2.3836858 |
| A_65_P0542 | 16.8     | Detected   | 12.5     | Not Detect | 7.4      | Not Detect | 12.4     | Not Detect | Vezt          | 0.738095238 | 0.44047619 | 0.992      | 0.592     |
| A_52_P1750 | 30189.6  | Detected   | 20651.2  | Detected   | 28502.2  | Detected   | 22280.7  | Detected   | Cd2ap         | 0.738025678 | 0.94410658 | 1.07890583 | 1.3801716 |
| A_55_P2090 | 207467.7 | Detected   | 163829   | Detected   | 160734.4 | Detected   | 153102.9 | Detected   | Plp2          | 0.737960174 | 0.77474421 | 0.93452869 | 0.9811108 |
| A_55_P1970 | 264.4    | Detected   | 43.1     | Detected   | 1083.5   | Detected   | 195.1    | Detected   | Pilrb2        | 0.737897126 | 4.09795764 | 4.52668213 | 25.139211 |
| A_55_P2000 | 34767.6  | Detected   | 25973    | Detected   | 28059.8  | Detected   | 25654.3  | Detected   | Rbm39         | 0.73787952  | 0.8070675  | 0.98772957 | 1.080345  |
| A_55_P1995 | 1611.4   | Detected   | 634.7    | Detected   | 2133.8   | Detected   | 1189     | Detected   | Aqp11         | 0.737867693 | 1.32419015 | 1.87332598 | 3.3619033 |
| A_55_P2133 | 30.9     | Detected   | 7.4      | Not Detect | 6.8      | Not Detect | 22.8     | Not Detect | Gm4951        | 0.737864078 | 0.22006472 | 3.08108108 | 0.9189189 |
| A_55_P2143 | 20.6     | Detected   | 14.7     | Not Detect | 19.1     | Detected   | 15.2     | Not Detect | 2610018G03Rik | 0.737864078 | 0.92718447 | 1.03401361 | 1.2993197 |
| A_55_P1991 | 750.3    | Detected   | 677.4    | Detected   | 758.6    | Detected   | 553.6    | Detected   | 9930021J03Rik | 0.737838198 | 1.01106224 | 0.8172424  | 1.1198701 |
| A_55_P2106 | 114      | Detected   | 67.7     | Detected   | 113.7    | Detected   | 84.1     | Detected   | Wfikkn1       | 0.737719298 | 0.99736842 | 1.2422452  | 1.6794682 |
| A_55_P2066 | 3800.1   | Detected   | 2143.3   | Detected   | 3021.1   | Detected   | 2802.8   | Detected   | Crtc3         | 0.737559538 | 0.79500539 | 1.30770307 | 1.4095554 |
| A_52_P4518 | 1466.1   | Detected   | 1323.7   | Detected   | 1124.3   | Detected   | 1081.3   | Detected   | Tlk2          | 0.737534957 | 0.76686447 | 0.81687694 | 0.8493616 |
| A_55_P1998 | 5967.7   | Detected   | 2286.8   | Detected   | 6131.4   | Detected   | 4401.3   | Detected   | Adck4         | 0.737520318 | 1.027431   | 1.92465454 | 2.6812139 |
| A_51_P3821 | 7519.7   | Detected   | 5619.7   | Detected   | 6905.6   | Detected   | 5545.9   | Detected   | Ormdl1        | 0.737516124 | 0.91833451 | 0.98686763 | 1.22882   |
| A_55_P2055 | 5529.7   | Detected   | 4292.6   | Detected   | 4256.2   | Detected   | 4078     | Detected   | Dvl2          | 0.737472196 | 0.76969818 | 0.95000699 | 0.9915203 |
| A_55_P2126 | 77.7     | Detected   | 48.7     | Detected   | 96.7     | Detected   | 57.3     | Detected   | Zfp53         | 0.737451737 | 1.24453024 | 1.17659138 | 1.9856263 |
| A_52_P1919 | 9364.9   | Detected   | 7379.4   | Detected   | 11542.9  | Detected   | 6905.7   | Detected   | Rtn3          | 0.737402428 | 1.23257056 | 0.93580779 | 1.5642058 |
| A_51_P4751 | 19.8     | Detected   | 16       | Not Detect | 13.2     | Not Detect | 14.6     | Not Detect | Duox1         | 0.737373737 | 0.66666667 | 0.9125     | 0.825     |
| A_52_P4622 | 1057.9   | Detected   | 653.8    | Detected   | 731.8    | Detected   | 780      | Detected   | Dclre1c       | 0.737309765 | 0.6917478  | 1.19302539 | 1.1193025 |

|            |                   |                   |                   |                   |               |             |            |            |           |
|------------|-------------------|-------------------|-------------------|-------------------|---------------|-------------|------------|------------|-----------|
| A_52_P1603 | 23.6 Detected     | 13.6 Not Detect   | 12.9 Not Detect   | 17.4 Not Detect   | 2410137M14Rik | 0.737288136 | 0.54661017 | 1.27941176 | 0.9485294 |
| A_51_P1247 | 2566.5 Detected   | 1999.4 Detected   | 2239.1 Detected   | 1892.1 Detected   | Ccdc93        | 0.73722969  | 0.87243327 | 0.9463339  | 1.119886  |
| A_55_P1999 | 2690 Detected     | 2138.7 Detected   | 2568.5 Detected   | 1982.9 Detected   | Zmynd19       | 0.737137546 | 0.95483271 | 0.92715201 | 1.2009632 |
| A_51_P4459 | 539.6 Detected    | 227.7 Detected    | 552 Detected      | 397.7 Detected    | 2310047K21Rik | 0.737027428 | 1.02297999 | 1.7465964  | 2.4242424 |
| A_52_P3292 | 685.9 Detected    | 538.7 Detected    | 499.6 Detected    | 505.5 Detected    | Chd1          | 0.736987899 | 0.72838606 | 0.93837015 | 0.9274179 |
| A_55_P2056 | 1557.1 Detected   | 1273.3 Detected   | 1269.4 Detected   | 1147.4 Detected   | Gcgr          | 0.736882666 | 0.81523345 | 0.90112307 | 0.9969371 |
| A_55_P2115 | 38 Detected       | 28.5 Detected     | 43.1 Detected     | 28 Not Detect     | Slc20a1       | 0.736842105 | 1.13421053 | 0.98245614 | 1.5122807 |
| A_55_P2072 | 11.4 Not Detect   | 17.9 Detected     | 12.8 Not Detect   | 8.4 Not Detect    | F8            | 0.736842105 | 1.12280702 | 0.46927374 | 0.7150838 |
| A_51_P4056 | 8587.6 Detected   | 6230.7 Detected   | 7618.6 Detected   | 6326.9 Detected   |               | 0.736748335 | 0.88716289 | 1.01543968 | 1.2227519 |
| A_66_P1067 | 2946.1 Detected   | 2720.7 Detected   | 2416.6 Detected   | 2170.5 Detected   | Akap8         | 0.736736703 | 0.82027087 | 0.79777263 | 0.8882273 |
| A_55_P2168 | 26.2 Detected     | 34.1 Detected     | 17.6 Detected     | 19.3 Not Detect   | Adam5         | 0.736641221 | 0.67175573 | 0.5659824  | 0.516129  |
| A_52_P4949 | 549.8 Detected    | 543 Detected      | 305.9 Detected    | 405 Detected      | Dhx40         | 0.736631502 | 0.55638414 | 0.74585635 | 0.5633517 |
| A_55_P2029 | 3416.6 Detected   | 2722.9 Detected   | 2749.6 Detected   | 2516.7 Detected   | Dhx35         | 0.736609495 | 0.80477668 | 0.92427192 | 1.0098057 |
| A_51_P4331 | 10922.1 Detected  | 6643.3 Detected   | 12544.6 Detected  | 8043.6 Detected   | Rdm1          | 0.736451781 | 1.14855202 | 1.2107838  | 1.8883085 |
| A_55_P2092 | 1304.8 Detected   | 857 Detected      | 1114.6 Detected   | 960.9 Detected    | Ddb2          | 0.736434703 | 0.85423053 | 1.12123687 | 1.3005834 |
| A_55_P2139 | 909.4 Detected    | 693.7 Detected    | 770.7 Detected    | 669.7 Detected    | Sft2d1        | 0.736419617 | 0.84748186 | 0.96540291 | 1.110999  |
| A_66_P1346 | 968.9 Detected    | 572.2 Detected    | 806 Detected      | 713.5 Detected    | Spin1         | 0.736402105 | 0.83187119 | 1.24694163 | 1.4085984 |
| A_55_P2075 | 919.5 Detected    | 850.7 Detected    | 196.2 Detected    | 676.9 Detected    | Clstn1        | 0.736160957 | 0.21337684 | 0.79569766 | 0.2306336 |
| A_52_P1646 | 670.1 Detected    | 383.2 Detected    | 627 Detected      | 493.3 Detected    | Nsun6         | 0.736158782 | 0.93568124 | 1.28731733 | 1.6362213 |
| A_55_P1980 | 6885.9 Detected   | 7644.8 Detected   | 7102.1 Detected   | 5069 Detected     | Pcbp2         | 0.736141971 | 1.03139749 | 0.66306509 | 0.9290106 |
| A_55_P2161 | 516.4 Detected    | 328.8 Detected    | 300.4 Detected    | 380.1 Detected    | Wdfy3         | 0.73605732  | 0.5817196  | 1.1560219  | 0.9136253 |
| A_66_P1350 | 25 Detected       | 23.4 Detected     | 24.7 Detected     | 18.4 Not Detect   | Nudt15        | 0.736       | 0.988      | 0.78632479 | 1.0555556 |
| A_55_P2008 | 319.7 Detected    | 295.4 Detected    | 233.6 Detected    | 235.2 Detected    | Cd300a        | 0.735689709 | 0.73068502 | 0.79620853 | 0.7907921 |
| A_51_P4526 | 22.7 Detected     | 20 Detected       | 17.3 Detected     | 16.7 Not Detect   | Ssc5d         | 0.735682819 | 0.76211454 | 0.835      | 0.865     |
| A_52_P1738 | 1001.9 Detected   | 760.3 Detected    | 805.9 Detected    | 737 Detected      | Cep104        | 0.735602356 | 0.80437169 | 0.9693542  | 1.0599763 |
| A_51_P1634 | 272.3 Detected    | 228.6 Detected    | 238.1 Detected    | 200.3 Detected    | 5430403G16Rik | 0.735585751 | 0.87440323 | 0.87620297 | 1.0415573 |
| A_55_P1971 | 12.1 Not Detect   | 3.1 Not Detect    | 16.1 Detected     | 8.9 Not Detect    | Muc15         | 0.73553719  | 1.33057851 | 2.87096774 | 5.1935484 |
| A_55_P2112 | 12.1 Not Detect   | 17.5 Detected     | 11.2 Not Detect   | 8.9 Not Detect    | 4930432E11Rik | 0.73553719  | 0.92561983 | 0.50857143 | 0.64      |
| A_52_P5560 | 3471.6 Detected   | 2107 Detected     | 2949.4 Detected   | 2553.4 Detected   | Oip5          | 0.735511004 | 0.84957944 | 1.21186521 | 1.3998102 |
| A_55_P2007 | 18.5 Detected     | 16.1 Not Detect   | 15.3 Not Detect   | 13.6 Not Detect   | Cyp2a4        | 0.735135135 | 0.82702703 | 0.8447205  | 0.9503106 |
| A_51_P4501 | 70672.4 Detected  | 49713 Detected    | 58877.9 Detected  | 51945.6 Detected  | 1110008F13Rik | 0.735019612 | 0.83311024 | 1.04490978 | 1.1843562 |
| A_51_P2487 | 16147.3 Detected  | 12877.2 Detected  | 12867.1 Detected  | 11868.4 Detected  | Cse1l         | 0.73500833  | 0.79685768 | 0.92165999 | 0.9992157 |
| A_55_P1968 | 1724.5 Detected   | 1135.5 Detected   | 1568.4 Detected   | 1267.5 Detected   | Pcgf2         | 0.734995651 | 0.90948101 | 1.11624835 | 1.3812417 |
| A_55_P2336 | 64.9 Detected     | 65.3 Detected     | 47.4 Detected     | 47.7 Detected     | E030042N06Rik | 0.734976888 | 0.73035439 | 0.73047473 | 0.7258806 |
| A_51_P4211 | 150101.6 Detected | 115483.7 Detected | 126222.7 Detected | 110317.7 Detected | Tubb6         | 0.734953525 | 0.84091509 | 0.95526641 | 1.0929915 |
| A_55_P2135 | 26.4 Detected     | 18 Not Detect     | 17.7 Not Detect   | 19.4 Not Detect   | Zfp526        | 0.734848485 | 0.67045455 | 1.07777778 | 0.9833333 |
| A_51_P5154 | 15633.2 Detected  | 10555.5 Detected  | 14784.9 Detected  | 11484.1 Detected  | Rbm17         | 0.734596884 | 0.94573728 | 1.08797309 | 1.4006821 |
| A_55_P2167 | 228.3 Detected    | 189.6 Detected    | 130.7 Detected    | 167.7 Detected    | BC030336      | 0.73455979  | 0.57249233 | 0.88449367 | 0.689346  |
| A_55_P2103 | 2074.2 Detected   | 1246.9 Detected   | 1393.3 Detected   | 1523.2 Detected   | Arhgap11a     | 0.734355414 | 0.67172886 | 1.22158954 | 1.1174112 |
| A_52_P7405 | 120939.4 Detected | 102549.1 Detected | 119230 Detected   | 88793.8 Detected  | Rps21         | 0.734200765 | 0.98586565 | 0.8658662  | 1.1626626 |

|            |          |            |          |            |          |            |          |            |               |             |            |            |           |
|------------|----------|------------|----------|------------|----------|------------|----------|------------|---------------|-------------|------------|------------|-----------|
| A_51_P5029 | 556      | Detected   | 455      | Detected   | 396.9    | Detected   | 408.2    | Detected   | Stxbp4        | 0.734172662 | 0.71384892 | 0.89714286 | 0.8723077 |
| A_51_P2136 | 1707.1   | Detected   | 828      | Detected   | 1690.7   | Detected   | 1253.3   | Detected   | Scnn1a        | 0.734169059 | 0.99039306 | 1.51364734 | 2.0419082 |
| A_55_P2082 | 4202.4   | Detected   | 2173.8   | Detected   | 2566.7   | Detected   | 3085.2   | Detected   | Rab11fip3     | 0.734151913 | 0.61077004 | 1.4192658  | 1.1807434 |
| A_55_P1985 | 95113.3  | Detected   | 73031.5  | Detected   | 108930.7 | Detected   | 69825.9  | Detected   | Tomm6         | 0.734133922 | 1.14527306 | 0.95610661 | 1.4915578 |
| A_55_P2070 | 25.2     | Detected   | 27.5     | Detected   | 30.6     | Detected   | 18.5     | Not Detect | Gm10413       | 0.734126984 | 1.21428571 | 0.67272727 | 1.1127273 |
| A_55_P1953 | 11764.7  | Detected   | 9830.6   | Detected   | 9874.1   | Detected   | 8636.7   | Detected   | Top1          | 0.734119867 | 0.83929892 | 0.87855268 | 1.004425  |
| A_55_P2094 | 4501.3   | Detected   | 2883.7   | Detected   | 4095.3   | Detected   | 3304.2   | Detected   | Gm7931        | 0.734054606 | 0.90980383 | 1.14581961 | 1.4201547 |
| A_55_P2081 | 124526.2 | Detected   | 90781.8  | Detected   | 102474.1 | Detected   | 91403.7  | Detected   | Gnas          | 0.734011798 | 0.82291197 | 1.00685049 | 1.1287956 |
| A_55_P2330 | 121      | Detected   | 68.9     | Detected   | 159.6    | Detected   | 88.8     | Detected   | C79130        | 0.733884298 | 1.31900826 | 1.28882438 | 2.3164006 |
| A_55_P1981 | 1083.8   | Detected   | 1182.2   | Detected   | 887.5    | Detected   | 795.3    | Detected   | Gemin8        | 0.733806975 | 0.81887802 | 0.67272881 | 0.750719  |
| A_66_P1077 | 145317.6 | Detected   | 122891.2 | Detected   | 128114.1 | Detected   | 106633.6 | Detected   | Myl12a        | 0.73379687  | 0.88161448 | 0.86770737 | 1.0425002 |
| A_55_P2004 | 4055.9   | Detected   | 2714.6   | Detected   | 2310.8   | Detected   | 2976.2   | Detected   | Micall2       | 0.733795212 | 0.56973791 | 1.09636779 | 0.8512488 |
| A_55_P2005 | 15.4     | Detected   | 6.7      | Not Detect | 11.1     | Not Detect | 11.3     | Not Detect | Olfrc392      | 0.733766234 | 0.72077922 | 1.68656716 | 1.6567164 |
| A_55_P2078 | 40647.5  | Detected   | 25585.1  | Detected   | 41552.8  | Detected   | 29824.9  | Detected   | Uck1          | 0.733745003 | 1.02227197 | 1.16571364 | 1.6241015 |
| A_51_P1917 | 67.2     | Detected   | 53.8     | Detected   | 41       | Detected   | 49.3     | Detected   | Olfml3        | 0.733630952 | 0.61011905 | 0.91635688 | 0.7620818 |
| A_55_P1963 | 2711.7   | Detected   | 1676.5   | Detected   | 2157.7   | Detected   | 1989.2   | Detected   | Vps18         | 0.733561972 | 0.79570011 | 1.18651953 | 1.2870265 |
| A_52_P1012 | 1271.8   | Detected   | 982.4    | Detected   | 959.5    | Detected   | 932.7    | Detected   | B230354K17Rik | 0.733370027 | 0.75444252 | 0.94940961 | 0.9766897 |
| A_66_P1247 | 371.3    | Detected   | 352.8    | Detected   | 244.8    | Detected   | 272.3    | Detected   | Rnf19b        | 0.733369243 | 0.65930514 | 0.7718254  | 0.6938776 |
| A_55_P2024 | 28510.3  | Detected   | 25796.2  | Detected   | 28755.3  | Detected   | 20906.9  | Detected   | Ctnnbl1       | 0.733310418 | 1.00859339 | 0.81046433 | 1.1147107 |
| A_51_P2288 | 32.6     | Detected   | 38       | Detected   | 34.1     | Detected   | 23.9     | Not Detect | Pkd2l2        | 0.733128834 | 1.04601227 | 0.62894737 | 0.8973684 |
| A_55_P2073 | 22.1     | Detected   | 38.6     | Detected   | 13.1     | Not Detect | 16.2     | Not Detect | Padi4         | 0.733031674 | 0.59276018 | 0.41968912 | 0.3393782 |
| A_55_P2171 | 1141.2   | Detected   | 906.8    | Detected   | 705.9    | Detected   | 836.5    | Detected   | Mier3         | 0.733000351 | 0.61855941 | 0.92247464 | 0.7784517 |
| A_52_P5101 | 150.9    | Detected   | 137.7    | Detected   | 136.5    | Detected   | 110.6    | Detected   | Pgm2l1        | 0.732935719 | 0.90457256 | 0.80319535 | 0.9912854 |
| A_52_P3332 | 32.2     | Detected   | 32.4     | Detected   | 35.1     | Detected   | 23.6     | Not Detect | Adam33        | 0.732919255 | 1.09006211 | 0.72839506 | 1.0833333 |
| A_51_P3458 | 2676     | Detected   | 1880.5   | Detected   | 2372.1   | Detected   | 1961.1   | Detected   | Prkra         | 0.732847534 | 0.88643498 | 1.04286094 | 1.2614198 |
| A_55_P2112 | 13.1     | Not Detect | 10.7     | Not Detect | 55.2     | Detected   | 9.6      | Not Detect | Habp2         | 0.732824427 | 4.21374046 | 0.89719626 | 5.1588785 |
| A_51_P4034 | 11.6     | Not Detect | 21.7     | Detected   | 3        | Not Detect | 8.5      | Not Detect | Pcdhb6        | 0.732758621 | 0.25862069 | 0.39170507 | 0.1382488 |
| A_55_P2062 | 1671.1   | Detected   | 1260.3   | Detected   | 1177.6   | Detected   | 1224.4   | Detected   | Gm5595        | 0.732691042 | 0.70468554 | 0.97151472 | 0.9343807 |
| A_55_P2454 | 212.1    | Detected   | 188.7    | Detected   | 164.1    | Detected   | 155.4    | Detected   | Alms1         | 0.732673267 | 0.77369165 | 0.82352941 | 0.8696343 |
| A_55_P1996 | 4474.8   | Detected   | 2916.2   | Detected   | 3271.9   | Detected   | 3278.5   | Detected   | Ttc17         | 0.732658443 | 0.73118352 | 1.12423702 | 1.1219738 |
| A_55_P1962 | 1973.4   | Detected   | 1904.5   | Detected   | 1649.9   | Detected   | 1445.8   | Detected   | Kpna3         | 0.732644167 | 0.83606973 | 0.75914938 | 0.8663166 |
| A_55_P1975 | 10942.4  | Detected   | 9409.1   | Detected   | 8430.7   | Detected   | 8016.2   | Detected   | 8430419L09Rik | 0.732581518 | 0.77046169 | 0.85196246 | 0.8960156 |
| A_55_P2258 | 412.8    | Detected   | 249.7    | Detected   | 229.5    | Detected   | 302.4    | Detected   | D930043N17Rik | 0.73255814  | 0.5559593  | 1.21105326 | 0.9191029 |
| A_52_P6465 | 38.5     | Detected   | 34.9     | Detected   | 27.6     | Detected   | 28.2     | Not Detect | Olfrc128      | 0.732467532 | 0.71688312 | 0.80802292 | 0.7908309 |
| A_55_P2151 | 10131.8  | Detected   | 7318     | Detected   | 8351     | Detected   | 7420.9   | Detected   | C330007P06Rik | 0.732436487 | 0.82423656 | 1.01406122 | 1.1411588 |
| A_52_P5741 | 89206.8  | Detected   | 77443    | Detected   | 72129.8  | Detected   | 65335.3  | Detected   | Psmd12        | 0.732402687 | 0.80856841 | 0.84365662 | 0.9313921 |
| A_51_P2101 | 1636.4   | Detected   | 1035.7   | Detected   | 922.1    | Detected   | 1198.5   | Detected   | Syne2         | 0.732400391 | 0.56349303 | 1.15718838 | 0.8903157 |
| A_55_P2275 | 14.2     | Detected   | 11.2     | Not Detect | 19.2     | Detected   | 10.4     | Not Detect | 9530034A14Rik | 0.732394366 | 1.35211268 | 0.92857143 | 1.7142857 |
| A_51_P3863 | 4977.2   | Detected   | 3736.1   | Detected   | 3472.6   | Detected   | 3645     | Detected   | Mtmr10        | 0.732339468 | 0.69770152 | 0.97561628 | 0.9294719 |
| A_51_P4868 | 69.1     | Detected   | 66       | Detected   | 57.1     | Detected   | 50.6     | Not Detect | Gpx2          | 0.732272069 | 0.82633864 | 0.76666667 | 0.8651515 |

|            |                  |                  |                  |                  |               |             |            |            |           |
|------------|------------------|------------------|------------------|------------------|---------------|-------------|------------|------------|-----------|
| A_55_P2011 | 2210.2 Detected  | 1514.3 Detected  | 1676 Detected    | 1618.4 Detected  | Armc10        | 0.732241426 | 0.75830242 | 1.06874463 | 1.106782  |
| A_55_P2154 | 137.4 Detected   | 85.7 Detected    | 116.1 Detected   | 100.6 Detected   | Lcmt2         | 0.73216885  | 0.84497817 | 1.17386231 | 1.3547258 |
| A_55_P2066 | 32.1 Detected    | 29.5 Detected    | 21.5 Detected    | 23.5 Not Detect  | Gm3455        | 0.732087227 | 0.66978193 | 0.79661017 | 0.7288136 |
| A_55_P2066 | 5540.9 Detected  | 4358.4 Detected  | 4851 Detected    | 4056.3 Detected  | Gabpb1        | 0.732065188 | 0.87548954 | 0.93068557 | 1.1130231 |
| A_55_P2157 | 344.7 Detected   | 247.5 Detected   | 219.9 Detected   | 252.3 Detected   | Abr           | 0.731940818 | 0.63794604 | 1.01939394 | 0.8884848 |
| A_55_P2000 | 3939.1 Detected  | 3683.3 Detected  | 3429.9 Detected  | 2883 Detected    | Peli1         | 0.731893072 | 0.87073189 | 0.78272202 | 0.931203  |
| A_52_P1408 | 281.2 Detected   | 544.2 Detected   | 291 Detected     | 205.8 Detected   | Slc26a10      | 0.731863442 | 1.03485064 | 0.37816979 | 0.5347299 |
| A_52_P6467 | 30.9 Detected    | 22.7 Detected    | 19.1 Detected    | 22.6 Not Detect  | Fbxl22        | 0.731391586 | 0.61812298 | 0.99559471 | 0.8414097 |
| A_55_P1957 | 4431.6 Detected  | 3234.9 Detected  | 4237.5 Detected  | 3241.1 Detected  | Hn11          | 0.731361134 | 0.95620092 | 1.0019166  | 1.3099323 |
| A_55_P2052 | 3090.5 Detected  | 2065.6 Detected  | 1887 Detected    | 2259.9 Detected  | A830080D01Rik | 0.7312409   | 0.61058081 | 1.09406468 | 0.913536  |
| A_55_P2084 | 6582.4 Detected  | 4928.4 Detected  | 3915.5 Detected  | 4812.4 Detected  | Ssbp3         | 0.731101118 | 0.59484383 | 0.97646295 | 0.7944769 |
| A_55_P2136 | 11.9 Not Detect  | 22.7 Detected    | 16.5 Detected    | 8.7 Not Detect   | Tsfm          | 0.731092437 | 1.38655462 | 0.38325991 | 0.7268722 |
| A_55_P2067 | 14.5 Detected    | 14.3 Not Detect  | 14.2 Not Detect  | 10.6 Not Detect  | Prss54        | 0.731034483 | 0.97931034 | 0.74125874 | 0.993007  |
| A_55_P2104 | 512.7 Detected   | 335.8 Detected   | 473.8 Detected   | 374.8 Detected   | Nphp1         | 0.731031792 | 0.92412717 | 1.11614056 | 1.4109589 |
| A_55_P2112 | 7255.3 Detected  | 7093.4 Detected  | 5900.7 Detected  | 5303.7 Detected  | Sipa111       | 0.731010434 | 0.81329511 | 0.74769504 | 0.8318578 |
| A_55_P2060 | 976.2 Detected   | 482.3 Detected   | 621.8 Detected   | 713.6 Detected   | Itpril2       | 0.730997746 | 0.63695964 | 1.47957703 | 1.2892391 |
| A_66_P1254 | 11140.7 Detected | 13720.9 Detected | 12725.6 Detected | 8142.5 Detected  | Rpl30         | 0.73087867  | 1.14226216 | 0.59343775 | 0.927461  |
| A_55_P2098 | 31503.7 Detected | 21531.4 Detected | 26201.1 Detected | 23021.1 Detected | Snrnp200      | 0.730742738 | 0.83168326 | 1.06918733 | 1.2168786 |
| A_52_P1067 | 8662.3 Detected  | 5740.6 Detected  | 7944.3 Detected  | 6329.8 Detected  | Rbm18         | 0.730729714 | 0.91711208 | 1.10263735 | 1.3838797 |
| A_55_P1955 | 14.1 Not Detect  | 27.6 Detected    | 13.8 Not Detect  | 10.3 Not Detect  | Crxos1        | 0.730496454 | 0.9787234  | 0.37318841 | 0.5       |
| A_55_P2007 | 45.6 Detected    | 59.9 Detected    | 32.9 Detected    | 33.3 Not Detect  | Cldn20        | 0.730263158 | 0.72149123 | 0.55592654 | 0.5492487 |
| A_51_P2685 | 1904.1 Detected  | 1594.2 Detected  | 1642.3 Detected  | 1390.4 Detected  | Csad          | 0.730213749 | 0.86250722 | 0.87216159 | 1.0301719 |
| A_65_P2069 | 2940.4 Detected  | 2330.1 Detected  | 2406.2 Detected  | 2146.9 Detected  | Tlk2          | 0.730138757 | 0.81832404 | 0.92137676 | 1.0326595 |
| A_52_P6226 | 445.8 Detected   | 300.9 Detected   | 384.9 Detected   | 325.4 Detected   | Adal          | 0.729923733 | 0.86339166 | 1.0814224  | 1.2791625 |
| A_51_P3418 | 1722 Detected    | 1293 Detected    | 2337.3 Detected  | 1256.9 Detected  | Nth1          | 0.729907085 | 1.35731707 | 0.97208043 | 1.8076566 |
| A_55_P2277 | 49.6 Detected    | 48.9 Detected    | 43.9 Detected    | 36.2 Not Detect  | 4933407O12Rik | 0.72983871  | 0.88508065 | 0.7402863  | 0.8977505 |
| A_55_P2076 | 5361.3 Detected  | 5074.2 Detected  | 5599.7 Detected  | 3912.7 Detected  | Nuf2          | 0.729804338 | 1.04446683 | 0.77109692 | 1.1035631 |
| A_55_P2049 | 6679.5 Detected  | 4936.8 Detected  | 8111.2 Detected  | 4873.8 Detected  | Apbb3         | 0.729665394 | 1.21434239 | 0.9872387  | 1.6430076 |
| A_55_P2112 | 72.5 Detected    | 47.2 Detected    | 39.9 Detected    | 52.9 Detected    | Ccdc13        | 0.729655172 | 0.55034483 | 1.12076271 | 0.845339  |
| A_52_P2454 | 1224.1 Detected  | 669.1 Detected   | 1135.4 Detected  | 893 Detected     | AW554918      | 0.729515562 | 0.9275386  | 1.33462861 | 1.6969063 |
| A_55_P2058 | 24.4 Detected    | 17.8 Detected    | 121.6 Detected   | 17.8 Not Detect  | Gm10817       | 0.729508197 | 4.98360656 | 1          | 6.8314607 |
| A_55_P2335 | 1696.6 Detected  | 1352.7 Detected  | 1805.5 Detected  | 1237.5 Detected  | Ndor1         | 0.729399976 | 1.0641872  | 0.91483699 | 1.3347379 |
| A_55_P1986 | 72.8 Detected    | 64.6 Detected    | 72.3 Detected    | 53.1 Detected    | Gm4956        | 0.729395604 | 0.99313187 | 0.82198142 | 1.119195  |
| A_55_P2091 | 633.7 Detected   | 475.2 Detected   | 424.3 Detected   | 462.2 Detected   | Thoc2         | 0.729367208 | 0.66955973 | 0.9726431  | 0.8928872 |
| A_52_P5538 | 964.2 Detected   | 523.4 Detected   | 1790.9 Detected  | 703.2 Detected   | Itgb3         | 0.729309272 | 1.85739473 | 1.34352312 | 3.421666  |
| A_55_P2129 | 1863.8 Detected  | 568.1 Detected   | 1125.3 Detected  | 1358.9 Detected  | Smad6         | 0.729101835 | 0.6037665  | 2.39200845 | 1.9808132 |
| A_52_P3724 | 110.7 Detected   | 77.1 Detected    | 84.4 Detected    | 80.7 Detected    | Gm5665        | 0.72899729  | 0.76242096 | 1.04669261 | 1.0946822 |
| A_55_P2066 | 941 Detected     | 556.3 Detected   | 750.6 Detected   | 685.9 Detected   | Crtc3         | 0.72890542  | 0.79766206 | 1.23296782 | 1.349272  |
| A_55_P1983 | 8444.1 Detected  | 4042.1 Detected  | 9212.3 Detected  | 6154.1 Detected  | Gramd4        | 0.728804728 | 1.09097476 | 1.52250068 | 2.2790876 |
| A_55_P2028 | 7382.1 Detected  | 4460.7 Detected  | 6539.7 Detected  | 5379.4 Detected  | Hmgn2         | 0.728708633 | 0.88588613 | 1.20595422 | 1.4660703 |

|            |         |          |         |            |         |            |         |            |               |             |            |            |           |
|------------|---------|----------|---------|------------|---------|------------|---------|------------|---------------|-------------|------------|------------|-----------|
| A_55_P2042 | 51094.7 | Detected | 29526.8 | Detected   | 42440.9 | Detected   | 37228.3 | Detected   | Hsd17b10      | 0.728613731 | 0.83063214 | 1.26083084 | 1.4373688 |
| A_55_P2085 | 696.1   | Detected | 520     | Detected   | 521.4   | Detected   | 507.1   | Detected   | 5530601H04Rik | 0.728487286 | 0.74903031 | 0.97519231 | 1.0026923 |
| A_51_P4359 | 2811.3  | Detected | 1895    | Detected   | 2445    | Detected   | 2047.9  | Detected   | Tnfaip8       | 0.728453029 | 0.86970441 | 1.08068602 | 1.2902375 |
| A_51_P1010 | 17.3    | Detected | 21.4    | Detected   | 46.7    | Detected   | 12.6    | Not Detect | Ak8           | 0.728323699 | 2.69942197 | 0.58878505 | 2.182243  |
| A_55_P2432 | 2306    | Detected | 1593.9  | Detected   | 1700    | Detected   | 1679.5  | Detected   | Prr14l        | 0.728317433 | 0.73720729 | 1.05370475 | 1.0665663 |
| A_55_P2131 | 20676.7 | Detected | 16835.8 | Detected   | 17685.3 | Detected   | 15056.6 | Detected   | Arfrp1        | 0.728191636 | 0.85532508 | 0.89432044 | 1.050458  |
| A_55_P2059 | 19991.2 | Detected | 14932.7 | Detected   | 16725.8 | Detected   | 14556.6 | Detected   | Slc48a1       | 0.728150386 | 0.83665813 | 0.97481366 | 1.1200788 |
| A_51_P5007 | 2127.4  | Detected | 1389.6  | Detected   | 1915.7  | Detected   | 1548.8  | Detected   | Dck           | 0.728024819 | 0.90048886 | 1.11456534 | 1.3785982 |
| A_51_P3707 | 1029.8  | Detected | 861.9   | Detected   | 851.9   | Detected   | 749.7   | Detected   | Polh          | 0.728005438 | 0.82724801 | 0.86982249 | 0.9883977 |
| A_55_P1988 | 238.2   | Detected | 196.6   | Detected   | 164.3   | Detected   | 173.4   | Detected   | Map3k14       | 0.727959698 | 0.68975651 | 0.8819939  | 0.835707  |
| A_55_P2031 | 717.5   | Detected | 720.8   | Detected   | 629.7   | Detected   | 522.3   | Detected   | Uxs1          | 0.727944251 | 0.87763066 | 0.72461154 | 0.8736127 |
| A_51_P4489 | 11708.9 | Detected | 10224   | Detected   | 6858.8  | Detected   | 8521.2  | Detected   | Sertad2       | 0.727754102 | 0.58577663 | 0.8334507  | 0.6708529 |
| A_52_P4860 | 6905.1  | Detected | 5475.8  | Detected   | 7915.3  | Detected   | 5024.9  | Detected   | Coq4          | 0.727708505 | 1.14629766 | 0.91765587 | 1.4455057 |
| A_55_P2157 | 7353.9  | Detected | 5757.6  | Detected   | 7561.5  | Detected   | 5351.4  | Detected   | Ndufaf1       | 0.727695509 | 1.02822992 | 0.92944977 | 1.3133076 |
| A_52_P4554 | 39218.9 | Detected | 27224.6 | Detected   | 32352.5 | Detected   | 28539.4 | Detected   | Itpa          | 0.727695065 | 0.82492115 | 1.04829456 | 1.1883554 |
| A_51_P1448 | 9129.1  | Detected | 5010.3  | Detected   | 7519.2  | Detected   | 6643    | Detected   | Mboat7        | 0.727673046 | 0.82365184 | 1.32586871 | 1.5007485 |
| A_55_P1975 | 6383.1  | Detected | 5108    | Detected   | 6109.3  | Detected   | 4644.8  | Detected   | Tor1aip1      | 0.727671508 | 0.95710548 | 0.90931872 | 1.1960258 |
| A_55_P2068 | 221     | Detected | 151.2   | Detected   | 159.4   | Detected   | 160.8   | Detected   | Gm19924       | 0.72760181  | 0.72126697 | 1.06349206 | 1.0542328 |
| A_51_P4744 | 12939.6 | Detected | 12956.8 | Detected   | 12775.3 | Detected   | 9414.5  | Detected   | Rnaseh2b      | 0.727572722 | 0.98730254 | 0.72660688 | 0.9859919 |
| A_51_P2490 | 51401.8 | Detected | 44750.1 | Detected   | 48248.1 | Detected   | 37397.3 | Detected   | Pycr2         | 0.727548452 | 0.93864612 | 0.83569199 | 1.0781674 |
| A_51_P3975 | 3761.7  | Detected | 3119.1  | Detected   | 3453.4  | Detected   | 2736.1  | Detected   | Mtrf1l        | 0.727357312 | 0.91804237 | 0.87720817 | 1.1071784 |
| A_55_P1999 | 167.1   | Detected | 117.3   | Detected   | 84      | Detected   | 121.5   | Detected   | Usp27x        | 0.727109515 | 0.502693   | 1.03580563 | 0.7161125 |
| A_52_P5772 | 67.4    | Detected | 74.6    | Detected   | 45.8    | Detected   | 49      | Detected   | Scfd2         | 0.727002967 | 0.67952522 | 0.65683646 | 0.613941  |
| A_55_P2039 | 536.9   | Detected | 343     | Detected   | 249.9   | Detected   | 390.3   | Detected   | Fam219a       | 0.726951015 | 0.4654498  | 1.13790087 | 0.7285714 |
| A_52_P6699 | 3791.1  | Detected | 2747    | Detected   | 2681.1  | Detected   | 2755.6  | Detected   | Cchcr1        | 0.726860278 | 0.70720899 | 1.00313069 | 0.9760102 |
| A_55_P1963 | 95.9    | Detected | 88.4    | Detected   | 112     | Detected   | 69.7    | Detected   | Lrrc16a       | 0.726798749 | 1.16788321 | 0.78846154 | 1.2669683 |
| A_55_P2120 | 51.6    | Detected | 4.7     | Not Detect | 3.5     | Not Detect | 37.5    | Not Detect | Olfir874      | 0.726744186 | 0.06782946 | 7.9787234  | 0.7446809 |
| A_55_P2042 | 5961.5  | Detected | 4133.4  | Detected   | 3243.5  | Detected   | 4332.1  | Detected   | Mpl           | 0.726679527 | 0.54407448 | 1.04807181 | 0.7847051 |
| A_55_P1972 | 466.1   | Detected | 518.7   | Detected   | 224     | Detected   | 338.7   | Detected   | Gsg1          | 0.726668097 | 0.48058357 | 0.6529786  | 0.4318489 |
| A_51_P1048 | 58045   | Detected | 31276.4 | Detected   | 47457.9 | Detected   | 42177.8 | Detected   | Itp3          | 0.726639676 | 0.81760531 | 1.34855034 | 1.5173709 |
| A_55_P2078 | 5392.4  | Detected | 4380.4  | Detected   | 4885.5  | Detected   | 3918.3  | Detected   | Qk            | 0.726633781 | 0.90599733 | 0.89450735 | 1.1153091 |
| A_51_P2333 | 31177.4 | Detected | 19894.3 | Detected   | 26656.7 | Detected   | 22651.3 | Detected   | Ppp2r5d       | 0.726529473 | 0.85500074 | 1.13858241 | 1.3399165 |
| A_55_P2164 | 155.4   | Detected | 134.4   | Detected   | 266.1   | Detected   | 112.9   | Detected   | Gm11744       | 0.726512227 | 1.71235521 | 0.84002976 | 1.9799107 |
| A_55_P2136 | 707     | Detected | 710.1   | Detected   | 824.3   | Detected   | 513.4   | Detected   | 8030462N17Rik | 0.726166902 | 1.16591231 | 0.72299676 | 1.1608224 |
| A_55_P2357 | 24.8    | Detected | 26.5    | Detected   | 24.8    | Detected   | 18      | Not Detect | 5330430P22Rik | 0.725806452 | 1          | 0.67924528 | 0.9358491 |
| A_52_P6646 | 1360.9  | Detected | 1121.2  | Detected   | 1270    | Detected   | 987.7   | Detected   | Zfp472        | 0.725769711 | 0.93320597 | 0.88093115 | 1.1327149 |
| A_52_P4325 | 9366.3  | Detected | 5203.5  | Detected   | 4993.8  | Detected   | 6797.6  | Detected   | Arid5b        | 0.72575083  | 0.53316678 | 1.30635149 | 0.9597002 |
| A_55_P2050 | 9052.4  | Detected | 7228.1  | Detected   | 7142.8  | Detected   | 6569.4  | Detected   | D11Wsu47e     | 0.7257081   | 0.78905042 | 0.90886955 | 0.9881988 |
| A_55_P1982 | 1857    | Detected | 1507.2  | Detected   | 1393.9  | Detected   | 1347.2  | Detected   | 1810043G02Rik | 0.72547119  | 0.75061928 | 0.89384289 | 0.9248275 |
| A_66_P1060 | 613.4   | Detected | 396.6   | Detected   | 654.3   | Detected   | 445     | Detected   | Ttc3          | 0.725464623 | 1.06667754 | 1.12203732 | 1.6497731 |

|            |                  |                  |                  |                  |               |             |            |            |           |
|------------|------------------|------------------|------------------|------------------|---------------|-------------|------------|------------|-----------|
| A_66_P1145 | 59 Detected      | 49.1 Detected    | 45.9 Detected    | 42.8 Detected    | Mta3          | 0.725423729 | 0.7779661  | 0.87169043 | 0.9348269 |
| A_51_P1711 | 14.2 Detected    | 13.1 Not Detect  | 24.8 Detected    | 10.3 Not Detect  | Smco2         | 0.725352113 | 1.74647887 | 0.78625954 | 1.8931298 |
| A_55_P2302 | 36225.2 Detected | 35838 Detected   | 37150.1 Detected | 26275.4 Detected | Tarbp2        | 0.72533485  | 1.02553195 | 0.73317149 | 1.036612  |
| A_51_P1153 | 73.9 Detected    | 63.4 Detected    | 73 Detected      | 53.6 Detected    | Pot1b         | 0.725304465 | 0.98782138 | 0.84542587 | 1.1514196 |
| A_55_P2116 | 346.9 Detected   | 301.8 Detected   | 243.3 Detected   | 251.6 Detected   | Caprin1       | 0.725281061 | 0.70135486 | 0.83366468 | 0.806163  |
| A_51_P2637 | 36.4 Detected    | 30.8 Detected    | 14.3 Not Detect  | 26.4 Not Detect  | Fbxo48        | 0.725274725 | 0.39285714 | 0.85714286 | 0.4642857 |
| A_55_P2076 | 4148.2 Detected  | 2812.3 Detected  | 3518.1 Detected  | 3008.5 Detected  | Immpl1        | 0.725254327 | 0.84810279 | 1.06976496 | 1.250969  |
| A_55_P2050 | 13.1 Not Detect  | 20 Detected      | 12.9 Not Detect  | 9.5 Not Detect   | Gm10457       | 0.72519084  | 0.98473282 | 0.475      | 0.645     |
| A_55_P1970 | 93.5 Detected    | 129.1 Detected   | 88.1 Detected    | 67.8 Detected    | Gm10696       | 0.72513369  | 0.94224599 | 0.52517428 | 0.6824167 |
| A_55_P1958 | 20 Detected      | 14.8 Not Detect  | 15.6 Not Detect  | 14.5 Not Detect  | Ar            | 0.725       | 0.78       | 0.97972973 | 1.0540541 |
| A_52_P6728 | 361.4 Detected   | 199.1 Detected   | 312.2 Detected   | 262 Detected     | Ctsa          | 0.724958495 | 0.86386276 | 1.31592165 | 1.5680563 |
| A_55_P2227 | 194.5 Detected   | 91.5 Detected    | 75.4 Detected    | 141 Detected     | A130072N09Rik | 0.724935733 | 0.38766067 | 1.54098361 | 0.8240437 |
| A_52_P4981 | 508.4 Detected   | 430.6 Detected   | 544.6 Detected   | 368.5 Detected   | Ccdc94        | 0.724822974 | 1.07120378 | 0.85578263 | 1.2647469 |
| A_66_P1348 | 8426.1 Detected  | 6954.2 Detected  | 6827.4 Detected  | 6106.2 Detected  | D11Wsu47e     | 0.724676897 | 0.8102681  | 0.8780593  | 0.9817664 |
| A_51_P2592 | 18081.5 Detected | 14791.2 Detected | 11569.8 Detected | 13103.1 Detected | Slc39a6       | 0.72466886  | 0.63986948 | 0.88587133 | 0.7822083 |
| A_52_P5655 | 30.5 Detected    | 38.9 Detected    | 18.8 Detected    | 22.1 Not Detect  | Arhgap20      | 0.724590164 | 0.61639344 | 0.56812339 | 0.4832905 |
| A_55_P2001 | 680 Detected     | 458.8 Detected   | 511.5 Detected   | 492.7 Detected   | 2210404O09Rik | 0.724558824 | 0.75220588 | 1.0738884  | 1.1148649 |
| A_55_P2074 | 89640.3 Detected | 64455.4 Detected | 76973.4 Detected | 64936.6 Detected | Gtf2f1        | 0.724413015 | 0.85869191 | 1.00746563 | 1.1942118 |
| A_55_P2000 | 5501.7 Detected  | 4702.6 Detected  | 3888.9 Detected  | 3985 Detected    | Terf1         | 0.724321573 | 0.70685425 | 0.84740356 | 0.8269681 |
| A_51_P3693 | 2780.2 Detected  | 1657 Detected    | 2081.9 Detected  | 2013.6 Detected  | Ubttd1        | 0.724264441 | 0.74883102 | 1.21520821 | 1.2564273 |
| A_52_P3158 | 518.9 Detected   | 308.1 Detected   | 312.7 Detected   | 375.8 Detected   | Zfp934        | 0.724224321 | 0.60262093 | 1.21973385 | 1.0149302 |
| A_51_P4879 | 23396.7 Detected | 18294.9 Detected | 24466.2 Detected | 16943.9 Detected | Sgol1         | 0.724200421 | 1.04571157 | 0.92615428 | 1.3373235 |
| A_51_P5185 | 461.9 Detected   | 349.2 Detected   | 304.8 Detected   | 334.5 Detected   | Atxn7         | 0.724182724 | 0.65988309 | 0.95790378 | 0.8728522 |
| A_55_P2073 | 1324.2 Detected  | 964.5 Detected   | 879 Detected     | 958.9 Detected   | Bbs5          | 0.724135327 | 0.66379701 | 0.99419388 | 0.911353  |
| A_52_P2623 | 48.2 Detected    | 47.4 Detected    | 34 Detected      | 34.9 Not Detect  | 4931406H21Rik | 0.72406639  | 0.70539419 | 0.73628692 | 0.7172996 |
| A_55_P2178 | 253.9 Detected   | 160.8 Detected   | 251.1 Detected   | 183.8 Detected   | Rbbp9         | 0.72390705  | 0.98897204 | 1.14303483 | 1.5615672 |
| A_51_P1812 | 5430.1 Detected  | 4565.8 Detected  | 4728.6 Detected  | 3930.8 Detected  | Smurf1        | 0.723890904 | 0.87081269 | 0.86092251 | 1.0356564 |
| A_55_P2068 | 4750.2 Detected  | 3922.4 Detected  | 3565.9 Detected  | 3438.1 Detected  | Gm9222        | 0.723780051 | 0.75068418 | 0.87652968 | 0.9091118 |
| A_55_P1997 | 18.1 Detected    | 13.4 Not Detect  | 12.3 Not Detect  | 13.1 Not Detect  | Klri1         | 0.723756906 | 0.67955801 | 0.97761194 | 0.9179104 |
| A_55_P2096 | 93 Detected      | 58.5 Detected    | 55 Detected      | 67.3 Detected    | AW554918      | 0.723655914 | 0.59139785 | 1.15042735 | 0.9401709 |
| A_51_P4547 | 131.7 Detected   | 104.8 Detected   | 91.5 Detected    | 95.3 Detected    | Tbc1d2        | 0.723614275 | 0.69476082 | 0.90935115 | 0.8730916 |
| A_55_P2041 | 12.3 Not Detect  | 7.2 Not Detect   | 36.3 Detected    | 8.9 Not Detect   | 4930503E14Rik | 0.723577236 | 2.95121951 | 1.23611111 | 5.0416667 |
| A_66_P1133 | 12.3 Not Detect  | 16.7 Detected    | 17.5 Detected    | 8.9 Not Detect   | 5430427G11Rik | 0.723577236 | 1.42276423 | 0.53293413 | 1.0479042 |
| A_55_P2403 | 12.3 Not Detect  | 35.3 Detected    | 3.2 Not Detect   | 8.9 Not Detect   | Fam26d        | 0.723577236 | 0.2601626  | 0.25212465 | 0.0906516 |
| A_55_P2063 | 9360.9 Detected  | 6878.7 Detected  | 7601.6 Detected  | 6773.3 Detected  | Slmo2         | 0.723573588 | 0.81205867 | 0.98467734 | 1.1050925 |
| A_55_P1967 | 3104.7 Detected  | 2158.7 Detected  | 3310 Detected    | 2246 Detected    | Kctd10        | 0.723419332 | 1.06612555 | 1.04044101 | 1.5333302 |
| A_55_P2183 | 2287.5 Detected  | 1552.5 Detected  | 1738.3 Detected  | 1654.7 Detected  | Runx1         | 0.72336612  | 0.75991257 | 1.06582931 | 1.1196779 |
| A_55_P2185 | 497.7 Detected   | 331 Detected     | 371.2 Detected   | 360 Detected     | Cd48          | 0.723327306 | 0.74583082 | 1.08761329 | 1.1214502 |
| A_51_P4873 | 17684.1 Detected | 14702.4 Detected | 13143.4 Detected | 12790.6 Detected | Hpcal1        | 0.723282497 | 0.74323262 | 0.86996681 | 0.8939629 |
| A_52_P1208 | 17167.1 Detected | 20215.4 Detected | 7980.2 Detected  | 12416 Detected   | Ankrd1        | 0.723243879 | 0.46485429 | 0.61418523 | 0.3947585 |

|            |         |            |         |            |         |            |         |            |               |             |            |            |           |
|------------|---------|------------|---------|------------|---------|------------|---------|------------|---------------|-------------|------------|------------|-----------|
| A_55_P1977 | 3178.7  | Detected   | 1971    | Detected   | 2581.8  | Detected   | 2298.9  | Detected   | Rs5-8s1       | 0.723220184 | 0.81221883 | 1.16636225 | 1.3098935 |
| A_55_P2019 | 18639.6 | Detected   | 12715.2 | Detected   | 9882.5  | Detected   | 13480.3 | Detected   | Samhd1        | 0.72320758  | 0.53018842 | 1.06017208 | 0.7772194 |
| A_51_P4170 | 1613.7  | Detected   | 1578.2  | Detected   | 1415.7  | Detected   | 1167    | Detected   | Srsf3         | 0.723182748 | 0.87730061 | 0.73945001 | 0.8970346 |
| A_55_P2041 | 1198.5  | Detected   | 723.5   | Detected   | 564.9   | Detected   | 866.6   | Detected   | Tubb3         | 0.723070505 | 0.47133917 | 1.19778853 | 0.7807878 |
| A_51_P1927 | 68889.3 | Detected   | 52685.1 | Detected   | 68342.4 | Detected   | 49811.7 | Detected   | Mrpl14        | 0.723068749 | 0.99206118 | 0.94546086 | 1.2971865 |
| A_66_P1185 | 48367.7 | Detected   | 35151.9 | Detected   | 29122.9 | Detected   | 34971.2 | Detected   | 11-Sep        | 0.723027971 | 0.60211463 | 0.99485945 | 0.8284872 |
| A_52_P3121 | 46.2    | Detected   | 129.7   | Detected   | 36.9    | Detected   | 33.4    | Not Detect | Sema3g        | 0.722943723 | 0.7987013  | 0.25751735 | 0.2845027 |
| A_55_P1984 | 132.1   | Detected   | 120.5   | Detected   | 123.1   | Detected   | 95.5    | Detected   | 4930529M08Rik | 0.722937169 | 0.9318698  | 0.79253112 | 1.0215768 |
| A_55_P2088 | 210.4   | Detected   | 217.3   | Detected   | 335     | Detected   | 152.1   | Detected   | Ahcyl2        | 0.722908745 | 1.59220532 | 0.69995398 | 1.5416475 |
| A_51_P1175 | 749.7   | Detected   | 172.3   | Detected   | 684     | Detected   | 541.9   | Detected   | Cables1       | 0.722822462 | 0.91236495 | 3.14509576 | 3.9698201 |
| A_55_P1952 | 2702.6  | Detected   | 1334.3  | Detected   | 3167.5  | Detected   | 1953.4  | Detected   | Odf2          | 0.722785466 | 1.17201954 | 1.46398861 | 2.3739039 |
| A_51_P1843 | 82.2    | Detected   | 128.4   | Detected   | 3.3     | Not Detect | 59.4    | Detected   | Dtna          | 0.722627737 | 0.04014599 | 0.46261682 | 0.0257009 |
| A_55_P2133 | 3603.7  | Detected   | 2430.5  | Detected   | 3187.9  | Detected   | 2603.5  | Detected   | Ube2v1        | 0.722451924 | 0.88461859 | 1.07117877 | 1.3116231 |
| A_55_P2010 | 389.1   | Detected   | 212.2   | Detected   | 307.6   | Detected   | 281.1   | Detected   | Pde4d         | 0.722436392 | 0.79054228 | 1.32469369 | 1.4495759 |
| A_52_P4525 | 128.2   | Detected   | 98.9    | Detected   | 88      | Detected   | 92.6    | Detected   | Kirrel        | 0.722308892 | 0.68642746 | 0.93629929 | 0.8897877 |
| A_55_P1982 | 64.8    | Detected   | 42.7    | Detected   | 57.3    | Detected   | 46.8    | Not Detect | Notch2        | 0.722222222 | 0.88425926 | 1.09601874 | 1.3419204 |
| A_55_P2408 | 21.6    | Detected   | 23.1    | Detected   | 21.2    | Detected   | 15.6    | Not Detect | 4930431P03Rik | 0.722222222 | 0.98148148 | 0.67532468 | 0.9177489 |
| A_55_P2040 | 203.7   | Detected   | 142.1   | Detected   | 146.4   | Detected   | 147.1   | Detected   | Gtf2i         | 0.722140403 | 0.71870398 | 1.03518649 | 1.0302604 |
| A_55_P2003 | 31.3    | Detected   | 10.8    | Not Detect | 21.5    | Detected   | 22.6    | Not Detect | 4930451G09Rik | 0.722044728 | 0.68690096 | 2.09259259 | 1.9907407 |
| A_51_P2867 | 2849.6  | Detected   | 2036.5  | Detected   | 2270.9  | Detected   | 2057.5  | Detected   | Zfp275        | 0.722031162 | 0.79691887 | 1.01031181 | 1.1150994 |
| A_66_P1376 | 3689.5  | Detected   | 3482.8  | Detected   | 1781.2  | Detected   | 2663.9  | Detected   | Mb21d1        | 0.722021954 | 0.48277544 | 0.76487309 | 0.5114276 |
| A_55_P2027 | 837.1   | Detected   | 680.7   | Detected   | 445.5   | Detected   | 604.4   | Detected   | Apbb2         | 0.722016485 | 0.53219448 | 0.8879095  | 0.6544733 |
| A_52_P1375 | 974.4   | Detected   | 640.3   | Detected   | 676.7   | Detected   | 703.3   | Detected   | Rttm          | 0.721777504 | 0.69447865 | 1.09839138 | 1.0568484 |
| A_51_P3826 | 10412.8 | Detected   | 7880.9  | Detected   | 9587.1  | Detected   | 7514.8  | Detected   | Zmynd19       | 0.721688691 | 0.92070337 | 0.95354591 | 1.2164981 |
| A_52_P1943 | 4293.2  | Detected   | 3018.7  | Detected   | 4397.3  | Detected   | 3098.2  | Detected   | Atp13a3       | 0.721652846 | 1.02424765 | 1.02633584 | 1.4566867 |
| A_52_P2046 | 1319.3  | Detected   | 905.6   | Detected   | 1751.1  | Detected   | 951.8   | Detected   | Map4k2        | 0.72144319  | 1.32729478 | 1.0510159  | 1.9336352 |
| A_51_P2017 | 22429.3 | Detected   | 15873.2 | Detected   | 20517.7 | Detected   | 16180   | Detected   | Crtap         | 0.721377841 | 0.9147722  | 1.01932818 | 1.2926001 |
| A_55_P2121 | 12.2    | Not Detect | 15.5    | Detected   | 12.2    | Not Detect | 8.8     | Not Detect | Efcc1         | 0.721311475 | 1          | 0.56774194 | 0.7870968 |
| A_55_P2114 | 883.4   | Detected   | 508.6   | Detected   | 298     | Detected   | 637.2   | Detected   | Garnl3        | 0.721304053 | 0.33733303 | 1.25285096 | 0.5859221 |
| A_51_P2433 | 29045   | Detected   | 23949.9 | Detected   | 34751.1 | Detected   | 20950.2 | Detected   | Galk1         | 0.721301429 | 1.19645722 | 0.87475104 | 1.4509914 |
| A_55_P2293 | 2734.2  | Detected   | 1485.7  | Detected   | 2301.5  | Detected   | 1972    | Detected   | Tbc1d5        | 0.72123473  | 0.8417453  | 1.32732046 | 1.5491014 |
| A_55_P2001 | 12174.4 | Detected   | 9132.1  | Detected   | 9178.3  | Detected   | 8779.6  | Detected   | Phf6          | 0.721152582 | 0.75390163 | 0.9613999  | 1.0050591 |
| A_66_P1022 | 87.8    | Detected   | 57.5    | Detected   | 66.7    | Detected   | 63.3    | Detected   | Hmga1         | 0.72095672  | 0.75968109 | 1.10086957 | 1.16      |
| A_55_P2384 | 103.9   | Detected   | 84.7    | Detected   | 82.3    | Detected   | 74.9    | Detected   | C81489        | 0.720885467 | 0.7921078  | 0.88429752 | 0.9716647 |
| A_55_P2021 | 84.5    | Detected   | 153.6   | Detected   | 88.5    | Detected   | 60.9    | Detected   | Ctsw          | 0.720710059 | 1.04733728 | 0.39648438 | 0.5761719 |
| A_55_P2304 | 591.6   | Detected   | 515     | Detected   | 478.2   | Detected   | 426.3   | Detected   | Noxa1         | 0.720588235 | 0.80831643 | 0.82776699 | 0.9285437 |
| A_51_P4872 | 9637.8  | Detected   | 6422.7  | Detected   | 10275.3 | Detected   | 6941.2  | Detected   | B9d2          | 0.720205856 | 1.0661458  | 1.08072929 | 1.5998412 |
| A_52_P6702 | 62.9    | Detected   | 26.7    | Detected   | 34.4    | Detected   | 45.3    | Not Detect | Tfpi          | 0.720190779 | 0.54689984 | 1.69662921 | 1.2883895 |
| A_52_P2012 | 8249.2  | Detected   | 6381.2  | Detected   | 9701.8  | Detected   | 5940.6  | Detected   | Xpo5          | 0.720142559 | 1.1760898  | 0.93095343 | 1.5203723 |
| A_66_P1135 | 11179.4 | Detected   | 7287.9  | Detected   | 10025   | Detected   | 8050.6  | Detected   | Wash          | 0.720128093 | 0.89673864 | 1.10465292 | 1.3755677 |

|            |                  |                  |                  |                  |               |             |            |            |           |
|------------|------------------|------------------|------------------|------------------|---------------|-------------|------------|------------|-----------|
| A_51_P2124 | 66.8 Detected    | 63.4 Detected    | 53.8 Detected    | 48.1 Not Detect  | Tmtc3         | 0.72005988  | 0.80538922 | 0.75867508 | 0.8485804 |
| A_66_P1132 | 15 Not Detect    | 17.5 Not Detect  | 23.2 Detected    | 10.8 Not Detect  | Mfng          | 0.72        | 1.54666667 | 0.61714286 | 1.3257143 |
| A_52_P5000 | 409.5 Detected   | 288.3 Detected   | 201.8 Detected   | 294.8 Detected   | Zfp551        | 0.71990232  | 0.49279609 | 1.02254596 | 0.6999653 |
| A_55_P2023 | 1801.1 Detected  | 1123.8 Detected  | 1241.8 Detected  | 1296.5 Detected  | Elp4          | 0.719837877 | 0.68946755 | 1.15367503 | 1.1050009 |
| A_52_P3566 | 75.3 Detected    | 153 Detected     | 18.9 Detected    | 54.2 Detected    | Shox2         | 0.719787517 | 0.25099602 | 0.35424837 | 0.1235294 |
| A_55_P2084 | 8087.3 Detected  | 7101.1 Detected  | 6167.9 Detected  | 5821 Detected    | Dcaf1212      | 0.719770504 | 0.76266492 | 0.81973215 | 0.8685837 |
| A_55_P2093 | 4079.2 Detected  | 3208.7 Detected  | 3471.3 Detected  | 2935.9 Detected  | Eif2s3x       | 0.719724456 | 0.85097568 | 0.91498115 | 1.08184   |
| A_55_P1967 | 12535.6 Detected | 9454.1 Detected  | 12400.8 Detected | 9021.1 Detected  | Kctd20        | 0.71963847  | 0.98924663 | 0.95419977 | 1.3116849 |
| A_52_P4268 | 4356.3 Detected  | 2308.2 Detected  | 3561.1 Detected  | 3134.4 Detected  | Fam178a       | 0.719509676 | 0.81745977 | 1.35794125 | 1.5428039 |
| A_51_P1211 | 108.7 Detected   | 78.1 Detected    | 76.6 Detected    | 78.2 Detected    | Arl10         | 0.719411224 | 0.70469181 | 1.00128041 | 0.9807939 |
| A_55_P1996 | 940.4 Detected   | 548.1 Detected   | 784.4 Detected   | 676.5 Detected   | Gm14325       | 0.719374734 | 0.83411314 | 1.23426382 | 1.4311257 |
| A_55_P2171 | 63012.4 Detected | 47974.3 Detected | 47366 Detected   | 45328.2 Detected | Tceb1         | 0.719353651 | 0.75169332 | 0.94484338 | 0.9873203 |
| A_55_P2050 | 1055.9 Detected  | 656.4 Detected   | 667.5 Detected   | 759.4 Detected   | LOC101055823  | 0.719196894 | 0.63216214 | 1.15691651 | 1.0169104 |
| A_55_P2089 | 337.2 Detected   | 272.8 Detected   | 356.7 Detected   | 242.5 Detected   | Tmed5         | 0.71915777  | 1.05782918 | 0.88892962 | 1.3075513 |
| A_55_P2100 | 23.5 Detected    | 27.6 Detected    | 20.5 Detected    | 16.9 Not Detect  | Neurog1       | 0.719148936 | 0.87234043 | 0.61231884 | 0.7427536 |
| A_55_P2086 | 23658.2 Detected | 18312.3 Detected | 23678.3 Detected | 17013.3 Detected | Slc35b2       | 0.719129097 | 1.0008496  | 0.92906407 | 1.2930271 |
| A_52_P1693 | 875 Detected     | 667.6 Detected   | 728.9 Detected   | 629.1 Detected   | Suv39h2       | 0.718971429 | 0.83302857 | 0.94233074 | 1.0918214 |
| A_51_P1314 | 1431.4 Detected  | 1128.8 Detected  | 881.9 Detected   | 1029 Detected    | Dpf1          | 0.718876624 | 0.6161101  | 0.91158753 | 0.7812721 |
| A_66_P1202 | 8607.8 Detected  | 3457.7 Detected  | 10689.4 Detected | 6187.7 Detected  | Nr1h3         | 0.718848022 | 1.24182718 | 1.78954218 | 3.091477  |
| A_51_P5078 | 3086.1 Detected  | 2378.7 Detected  | 2107.9 Detected  | 2217.9 Detected  | Ttc8          | 0.718674055 | 0.68303036 | 0.93240005 | 0.8861563 |
| A_55_P2107 | 7984.7 Detected  | 6726.8 Detected  | 5109.4 Detected  | 5738.3 Detected  | Smad5         | 0.718661941 | 0.63989881 | 0.85305048 | 0.7595588 |
| A_55_P2106 | 32.7 Detected    | 39 Detected      | 36.7 Detected    | 23.5 Not Detect  | Sstr3         | 0.718654434 | 1.12232416 | 0.6025641  | 0.9410256 |
| A_52_P2233 | 3110.4 Detected  | 2898.9 Detected  | 3256.3 Detected  | 2235.2 Detected  | Mib1          | 0.718621399 | 1.04690715 | 0.77105109 | 1.1232881 |
| A_55_P2024 | 9449.2 Detected  | 4907.8 Detected  | 7431.9 Detected  | 6790.1 Detected  | Abl1          | 0.718589934 | 0.78651103 | 1.38353234 | 1.5143038 |
| A_55_P2466 | 96.3 Detected    | 43.2 Detected    | 46.5 Detected    | 69.2 Detected    | 4930402H24Rik | 0.718587747 | 0.48286604 | 1.60185185 | 1.0763889 |
| A_52_P1281 | 2922.5 Detected  | 1884.7 Detected  | 61.1 Detected    | 2099.8 Detected  | Foxd1         | 0.71849444  | 0.02090676 | 1.11412957 | 0.032419  |
| A_52_P5373 | 44.4 Detected    | 48.4 Detected    | 34.3 Detected    | 31.9 Not Detect  | Eml5          | 0.718468468 | 0.77252252 | 0.65909091 | 0.7086777 |
| A_55_P2157 | 2090.3 Detected  | 1410.9 Detected  | 1935.5 Detected  | 1501.7 Detected  | Nqo2          | 0.718413625 | 0.92594364 | 1.06435608 | 1.3718194 |
| A_51_P2562 | 68984.5 Detected | 44400.4 Detected | 70493.9 Detected | 49558.1 Detected | Ctsz          | 0.718394712 | 1.02188028 | 1.11616337 | 1.5876861 |
| A_55_P2216 | 247.5 Detected   | 204.6 Detected   | 237.2 Detected   | 177.8 Detected   | Tmem87a       | 0.718383838 | 0.95838384 | 0.86901271 | 1.1593353 |
| A_52_P5172 | 49.7 Detected    | 39.8 Detected    | 39.6 Detected    | 35.7 Not Detect  | Zfp526        | 0.718309859 | 0.79678068 | 0.89698492 | 0.9949749 |
| A_55_P1961 | 14.2 Not Detect  | 21.2 Detected    | 9.4 Not Detect   | 10.2 Not Detect  | Tes           | 0.718309859 | 0.66197183 | 0.48113208 | 0.4433962 |
| A_52_P4176 | 5164.6 Detected  | 4512.5 Detected  | 4286.1 Detected  | 3709 Detected    | Tcea1         | 0.718158231 | 0.8298997  | 0.82193906 | 0.9498283 |
| A_51_P2245 | 27297.2 Detected | 21628.6 Detected | 27111.2 Detected | 19603.5 Detected | Ppm1f         | 0.71815058  | 0.99318611 | 0.90636934 | 1.2534884 |
| A_55_P2087 | 31.2 Detected    | 21.8 Detected    | 11.5 Not Detect  | 22.4 Not Detect  | LOC640793     | 0.717948718 | 0.36858974 | 1.02752294 | 0.5275229 |
| A_55_P2279 | 836.3 Detected   | 759.5 Detected   | 673.1 Detected   | 600.4 Detected   | D2Bwg0886e    | 0.71792419  | 0.80485472 | 0.79052008 | 0.8862409 |
| A_55_P2046 | 82.6 Detected    | 166.5 Detected   | 74.6 Detected    | 59.3 Detected    | Zfand4        | 0.717917676 | 0.9031477  | 0.35615616 | 0.448048  |
| A_55_P2030 | 2552.8 Detected  | 2289.1 Detected  | 2131.8 Detected  | 1832.4 Detected  | Kdm8          | 0.717800063 | 0.83508305 | 0.80048928 | 0.931283  |
| A_51_P2962 | 217.9 Detected   | 170.7 Detected   | 164.4 Detected   | 156.4 Detected   | Foxs1         | 0.717760441 | 0.75447453 | 0.9162273  | 0.9630931 |
| A_55_P2012 | 1519.5 Detected  | 5192.9 Detected  | 227.9 Detected   | 1090.6 Detected  | Armcx2        | 0.717736097 | 0.14998355 | 0.21001752 | 0.0438868 |



|            |          |          |         |            |          |            |         |            |                |             |            |            |           |
|------------|----------|----------|---------|------------|----------|------------|---------|------------|----------------|-------------|------------|------------|-----------|
| A_51_P4905 | 9846.6   | Detected | 6984.8  | Detected   | 7827.6   | Detected   | 7066.9  | Detected   | Bub1b          | 0.71769951  | 0.7949546  | 1.01175409 | 1.120662  |
| A_66_P1123 | 17       | Detected | 10.3    | Not Detect | 11.9     | Not Detect | 12.2    | Not Detect | Myo1f          | 0.717647059 | 0.7        | 1.18446602 | 1.1553398 |
| A_52_P3550 | 244.3    | Detected | 207.2   | Detected   | 180.5    | Detected   | 175.3   | Detected   | Dstyk          | 0.717560377 | 0.73884568 | 0.84604247 | 0.871139  |
| A_51_P2419 | 45467.3  | Detected | 36515.4 | Detected   | 26790.6  | Detected   | 32622.6 | Detected   | Sap30l         | 0.717495871 | 0.58922786 | 0.89339292 | 0.7336795 |
| A_65_P1067 | 81.4     | Detected | 64.3    | Detected   | 59.6     | Detected   | 58.4    | Detected   | Ccne2          | 0.717444717 | 0.73218673 | 0.90824261 | 0.9269051 |
| A_55_P2075 | 254.1    | Detected | 411.4   | Detected   | 123.4    | Detected   | 182.3   | Detected   | Dtnb           | 0.717434081 | 0.48563558 | 0.44312105 | 0.2999514 |
| A_52_P1367 | 237.1    | Detected | 499.3   | Detected   | 108.6    | Detected   | 170.1   | Detected   | Pctp           | 0.717418811 | 0.45803458 | 0.34067695 | 0.2175045 |
| A_55_P1965 | 30497    | Detected | 18690.2 | Detected   | 30613.9  | Detected   | 21877.4 | Detected   | Spsb3          | 0.717362364 | 1.00383316 | 1.17052787 | 1.6379654 |
| A_66_P1359 | 7572.8   | Detected | 4647.2  | Detected   | 5695.7   | Detected   | 5432    | Detected   | Ocrl           | 0.717304035 | 0.75212603 | 1.16887588 | 1.2256197 |
| A_51_P2850 | 3174.4   | Detected | 1866.5  | Detected   | 2505.8   | Detected   | 2276.9  | Detected   | Rtf1           | 0.717269405 | 0.78937752 | 1.21987677 | 1.3425127 |
| A_51_P2673 | 4591.7   | Detected | 4282.6  | Detected   | 5116.7   | Detected   | 3293.1  | Detected   | Itm2c          | 0.717185356 | 1.11433674 | 0.76894877 | 1.1947649 |
| A_55_P2072 | 50.2     | Detected | 45.2    | Detected   | 56.5     | Detected   | 36      | Not Detect | Lpin2          | 0.717131474 | 1.12549801 | 0.79646018 | 1.25      |
| A_51_P3221 | 294.4    | Detected | 250.9   | Detected   | 274.7    | Detected   | 211.1   | Detected   | Pptc7          | 0.71705163  | 0.93308424 | 0.84137106 | 1.0948585 |
| A_55_P2046 | 13855    | Detected | 6512.2  | Detected   | 9981.3   | Detected   | 9934.7  | Detected   | Itpril2        | 0.717047997 | 0.7204114  | 1.52555204 | 1.5327078 |
| A_55_P2105 | 124144.6 | Detected | 90003.5 | Detected   | 107469.1 | Detected   | 88999.1 | Detected   | Pcna           | 0.716898681 | 0.8656768  | 0.98884043 | 1.1940547 |
| A_55_P1972 | 51.9     | Detected | 51.1    | Detected   | 10.4     | Not Detect | 37.2    | Not Detect | I830012O16Rik  | 0.716763006 | 0.20038536 | 0.72798434 | 0.2035225 |
| A_55_P1962 | 318.8    | Detected | 136.9   | Detected   | 222.1    | Detected   | 228.5   | Detected   | Trim21         | 0.716750314 | 0.69667503 | 1.66910153 | 1.6223521 |
| A_51_P3587 | 23.3     | Detected | 24.9    | Detected   | 37.8     | Detected   | 16.7    | Not Detect | Olf1221        | 0.716738197 | 1.6223176  | 0.67068273 | 1.5180723 |
| A_55_P2179 | 18       | Detected | 64.4    | Detected   | 4        | Not Detect | 12.9    | Not Detect | Gbp8           | 0.716666667 | 0.22222222 | 0.20031056 | 0.0621118 |
| A_55_P2339 | 482.5    | Detected | 438.1   | Detected   | 357.3    | Detected   | 345.7   | Detected   | AW060742       | 0.716476684 | 0.74051813 | 0.78908925 | 0.8155672 |
| A_55_P2275 | 1248.3   | Detected | 897.9   | Detected   | 883      | Detected   | 894.3   | Detected   | Zfp335         | 0.716414323 | 0.70736201 | 0.99599064 | 0.9834057 |
| A_51_P2074 | 2705.3   | Detected | 2278.2  | Detected   | 1809.9   | Detected   | 1937.8  | Detected   | Ankrd32        | 0.716297638 | 0.66902007 | 0.85058379 | 0.794443  |
| A_55_P2175 | 1554.4   | Detected | 1065.8  | Detected   | 1350.9   | Detected   | 1113    | Detected   | Mfap1b         | 0.716031909 | 0.86908132 | 1.04428598 | 1.2674986 |
| A_55_P2127 | 15022.6  | Detected | 12687   | Detected   | 12313    | Detected   | 10753   | Detected   | Sys1           | 0.715788212 | 0.81963175 | 0.84756049 | 0.970521  |
| A_52_P2494 | 2199.7   | Detected | 1048.6  | Detected   | 2362.5   | Detected   | 1574.3  | Detected   | Vegfa          | 0.715688503 | 1.07401009 | 1.50133511 | 2.253004  |
| A_55_P2129 | 338.3    | Detected | 272.5   | Detected   | 268.6    | Detected   | 242.1   | Detected   | Cdc42bpa       | 0.715637009 | 0.79396985 | 0.88844037 | 0.9856881 |
| A_52_P5329 | 358.2    | Detected | 211.5   | Detected   | 278.9    | Detected   | 256.3   | Detected   | Pxn            | 0.715522055 | 0.7786153  | 1.21182033 | 1.3186761 |
| A_55_P2005 | 7755.4   | Detected | 5893.8  | Detected   | 5197.8   | Detected   | 5548.1  | Detected   | LOC101055804   | 0.715385409 | 0.67021688 | 0.94134514 | 0.8819098 |
| A_52_P4536 | 2884.1   | Detected | 1929.5  | Detected   | 2947.7   | Detected   | 2063.2  | Detected   | Arl6ip6        | 0.71537048  | 1.02205194 | 1.06929256 | 1.5277015 |
| A_55_P1970 | 66.4     | Detected | 65      | Detected   | 73.3     | Detected   | 47.5    | Not Detect | C5ar2          | 0.715361446 | 1.10391566 | 0.73076923 | 1.1276923 |
| A_55_P2139 | 27.4     | Detected | 33.1    | Detected   | 33.3     | Detected   | 19.6    | Not Detect | Gm7444         | 0.715328467 | 1.21532847 | 0.59214502 | 1.0060423 |
| A_55_P2005 | 2250.8   | Detected | 2143.7  | Detected   | 1747.5   | Detected   | 1609.8  | Detected   | Tardbp         | 0.715212369 | 0.77639062 | 0.75094463 | 0.8151794 |
| A_51_P4795 | 692.4    | Detected | 480.6   | Detected   | 227.8    | Detected   | 495.1   | Detected   | Obsl1          | 0.715049105 | 0.32900058 | 1.03017062 | 0.4739908 |
| A_51_P4201 | 283.2    | Detected | 182.3   | Detected   | 209.6    | Detected   | 202.5   | Detected   | Senp5          | 0.715042373 | 0.74011299 | 1.11080636 | 1.1497532 |
| A_52_P3571 | 28491.1  | Detected | 21851.2 | Detected   | 20524.3  | Detected   | 20371   | Detected   | Selm           | 0.714995209 | 0.72037584 | 0.93226001 | 0.9392756 |
| A_52_P4605 | 265.2    | Detected | 225.5   | Detected   | 199.4    | Detected   | 189.6   | Detected   | Runx2          | 0.714932127 | 0.75188537 | 0.84079823 | 0.8842572 |
| A_55_P2121 | 624.2    | Detected | 477.3   | Detected   | 491.9    | Detected   | 446.2   | Detected   | 2810047C21Rik1 | 0.714834989 | 0.7880487  | 0.93484182 | 1.0305887 |
| A_55_P2131 | 5139.3   | Detected | 4518.3  | Detected   | 5614.4   | Detected   | 3672.5  | Detected   | Loxl2          | 0.714591481 | 1.0924445  | 0.8128057  | 1.2425912 |
| A_51_P1413 | 28480.1  | Detected | 20119.8 | Detected   | 23476.9  | Detected   | 20349.8 | Detected   | Anapc1         | 0.714526986 | 0.82432646 | 1.01143153 | 1.1668555 |
| A_55_P2108 | 10222.6  | Detected | 6789    | Detected   | 8749     | Detected   | 7304.3  | Detected   | Mavs           | 0.714524681 | 0.85584881 | 1.07590219 | 1.2887023 |

|            |         |          |         |            |         |            |         |            |               |             |            |            |           |
|------------|---------|----------|---------|------------|---------|------------|---------|------------|---------------|-------------|------------|------------|-----------|
| A_66_P1297 | 317.1   | Detected | 68.4    | Detected   | 290.3   | Detected   | 226.5   | Detected   | Gsap          | 0.714285714 | 0.91548407 | 3.31140351 | 4.244152  |
| A_66_P1319 | 5644.9  | Detected | 4932.6  | Detected   | 3960.8  | Detected   | 4031.8  | Detected   | Cdc6          | 0.71423763  | 0.70165991 | 0.81737826 | 0.8029842 |
| A_51_P4272 | 180.2   | Detected | 345.9   | Detected   | 181.1   | Detected   | 128.7   | Detected   | 2410018M08Rik | 0.714206437 | 1.00499445 | 0.37207285 | 0.5235617 |
| A_51_P4309 | 8825.8  | Detected | 8450    | Detected   | 6715.1  | Detected   | 6302    | Detected   | Rdx           | 0.71404292  | 0.76084887 | 0.74579882 | 0.7946864 |
| A_55_P2205 | 273.3   | Detected | 161     | Detected   | 164.2   | Detected   | 195.1   | Detected   | C88045        | 0.713867545 | 0.60080498 | 1.21180124 | 1.0198758 |
| A_52_P1647 | 67.1    | Detected | 49.6    | Detected   | 75.5    | Detected   | 47.9    | Detected   | Lct           | 0.713859911 | 1.12518629 | 0.96572581 | 1.5221774 |
| A_55_P2031 | 24.1    | Detected | 27.8    | Detected   | 23.9    | Not Detect | 17.2    | Not Detect | Igf1          | 0.713692946 | 0.99170124 | 0.61870504 | 0.8597122 |
| A_66_P1277 | 18.5    | Detected | 15.9    | Not Detect | 17.4    | Not Detect | 13.2    | Not Detect | Smpd5         | 0.713513514 | 0.94054054 | 0.83018868 | 1.0943396 |
| A_52_P5474 | 239.1   | Detected | 352.9   | Detected   | 158.4   | Detected   | 170.6   | Detected   | Lurap1        | 0.713508992 | 0.66248432 | 0.48342307 | 0.4488524 |
| A_51_P4106 | 231.4   | Detected | 110.6   | Detected   | 37.1    | Detected   | 165.1   | Detected   | Irx5          | 0.713483146 | 0.16032844 | 1.49276673 | 0.335443  |
| A_66_P1298 | 5808.8  | Detected | 4991.4  | Detected   | 7703    | Detected   | 4143.8  | Detected   | Fxn           | 0.713365928 | 1.32609145 | 0.83018792 | 1.5432544 |
| A_55_P2106 | 10319   | Detected | 7422.9  | Detected   | 8022.5  | Detected   | 7361.2  | Detected   | Cenpk         | 0.713363698 | 0.77744937 | 0.99168788 | 1.0807771 |
| A_55_P2162 | 34726.4 | Detected | 20755.5 | Detected   | 29419.2 | Detected   | 24772.3 | Detected   | Hmgn2         | 0.713356409 | 0.84717103 | 1.19352943 | 1.4174171 |
| A_55_P2062 | 7645.4  | Detected | 6134    | Detected   | 7089.2  | Detected   | 5453.6  | Detected   | Smc5          | 0.713317812 | 0.92725037 | 0.88907727 | 1.1557222 |
| A_55_P2030 | 3388.5  | Detected | 5420    | Detected   | 2323.8  | Detected   | 2417    | Detected   | Adssl1        | 0.713294968 | 0.68579017 | 0.44594096 | 0.4287454 |
| A_55_P2007 | 28.6    | Detected | 18.9    | Detected   | 17.4    | Not Detect | 20.4    | Not Detect | A530021J07Rik | 0.713286713 | 0.60839161 | 1.07936508 | 0.9206349 |
| A_55_P2055 | 1809.6  | Detected | 1184    | Detected   | 1643    | Detected   | 1290.6  | Detected   | Rtfdc1        | 0.713196286 | 0.90793546 | 1.09003378 | 1.3876689 |
| A_55_P2097 | 50.9    | Detected | 44.4    | Detected   | 45.1    | Detected   | 36.3    | Not Detect | Zc3h4         | 0.713163065 | 0.88605108 | 0.81756757 | 1.0157658 |
| A_52_P1803 | 14269.9 | Detected | 11816.3 | Detected   | 15546   | Detected   | 10176.6 | Detected   | Mrpl28        | 0.713151459 | 1.08942599 | 0.86123406 | 1.3156403 |
| A_66_P1387 | 137     | Detected | 44.9    | Detected   | 77.1    | Detected   | 97.7    | Detected   | Glis3         | 0.713138686 | 0.56277372 | 2.17594655 | 1.7171492 |
| A_55_P2240 | 58.9    | Detected | 39.7    | Detected   | 36.3    | Detected   | 42      | Not Detect | Epb4.1        | 0.713073005 | 0.61629881 | 1.05793451 | 0.9143577 |
| A_52_P8947 | 1557.9  | Detected | 1508.7  | Detected   | 872.4   | Detected   | 1110.6  | Detected   | Bcl9          | 0.712882727 | 0.55998459 | 0.73613044 | 0.5782462 |
| A_55_P2070 | 8206.2  | Detected | 4724.7  | Detected   | 6220.9  | Detected   | 5849.9  | Detected   | Rapgef1       | 0.712863445 | 0.75807316 | 1.23815269 | 1.3166762 |
| A_55_P2154 | 1542.4  | Detected | 1254.2  | Detected   | 857.2   | Detected   | 1099.2  | Detected   | Myo18a        | 0.712655602 | 0.55575726 | 0.87641524 | 0.6834636 |
| A_55_P2095 | 12139.4 | Detected | 6473.8  | Detected   | 8866.6  | Detected   | 8650.5  | Detected   | Rara          | 0.712596998 | 0.73039854 | 1.3362322  | 1.3696129 |
| A_55_P2054 | 112     | Detected | 76.3    | Detected   | 55.7    | Detected   | 79.8    | Detected   | Ttpal         | 0.7125      | 0.49732143 | 1.04587156 | 0.7300131 |
| A_51_P2150 | 53737   | Detected | 45827.7 | Detected   | 48136.9 | Detected   | 38279.6 | Detected   | Emc4          | 0.712350894 | 0.89578689 | 0.83529394 | 1.0503887 |
| A_55_P1956 | 291.2   | Detected | 167.4   | Detected   | 201     | Detected   | 207.4   | Detected   | Tln1          | 0.712225275 | 0.69024725 | 1.23894863 | 1.2007168 |
| A_55_P1953 | 99.7    | Detected | 94.4    | Detected   | 77.2    | Detected   | 71      | Detected   | Cdkl3         | 0.712136409 | 0.77432297 | 0.75211864 | 0.8177966 |
| A_51_P1530 | 5867.1  | Detected | 5189.5  | Detected   | 5952.2  | Detected   | 4177.8  | Detected   | Phax          | 0.712072404 | 1.01450461 | 0.80504866 | 1.1469698 |
| A_55_P2063 | 11975.5 | Detected | 9541    | Detected   | 10263.4 | Detected   | 8526.1  | Detected   | Commd7        | 0.711961922 | 0.85703311 | 0.8936275  | 1.0757153 |
| A_51_P2527 | 27003.2 | Detected | 25571.5 | Detected   | 22702.7 | Detected   | 19219.5 | Detected   | Fam216a       | 0.711748978 | 0.8407411  | 0.75159846 | 0.8878126 |
| A_55_P2139 | 22228.7 | Detected | 17746.5 | Detected   | 21950.2 | Detected   | 15821.2 | Detected   | Tsr3          | 0.711746526 | 0.98747115 | 0.891511   | 1.2368749 |
| A_55_P2193 | 28.1    | Detected | 22.5    | Detected   | 18.3    | Detected   | 20      | Not Detect | A330032P22Rik | 0.711743772 | 0.65124555 | 0.88888889 | 0.8133333 |
| A_55_P1984 | 26281.7 | Detected | 16848.3 | Detected   | 19214.2 | Detected   | 18703.4 | Detected   | Emd           | 0.711651073 | 0.73108665 | 1.11010606 | 1.1404237 |
| A_55_P2122 | 15.6    | Detected | 15      | Not Detect | 23.2    | Detected   | 11.1    | Not Detect | Olfrc307      | 0.711538462 | 1.48717949 | 0.74       | 1.5466667 |
| A_55_P2410 | 20.8    | Detected | 23.8    | Detected   | 24.4    | Detected   | 14.8    | Not Detect | Glb1l         | 0.711538462 | 1.17307692 | 0.62184874 | 1.0252101 |
| A_55_P2340 | 204.5   | Detected | 140.8   | Detected   | 164.1   | Detected   | 145.5   | Detected   | AI849538      | 0.711491443 | 0.80244499 | 1.03338068 | 1.165483  |
| A_55_P2084 | 1765.8  | Detected | 1416.3  | Detected   | 1325.6  | Detected   | 1256.2  | Detected   | Uba1          | 0.711405595 | 0.75070789 | 0.88695898 | 0.9359599 |
| A_55_P2156 | 2246.7  | Detected | 1927.1  | Detected   | 2163.2  | Detected   | 1598.2  | Detected   | Zfp51         | 0.711354431 | 0.96283438 | 0.82932904 | 1.1225157 |

|            |         |            |         |            |         |            |         |            |               |             |            |            |           |
|------------|---------|------------|---------|------------|---------|------------|---------|------------|---------------|-------------|------------|------------|-----------|
| A_55_P2155 | 117.7   | Detected   | 148.5   | Detected   | 91.1    | Detected   | 83.7    | Detected   | Hctr1         | 0.711129992 | 0.7740017  | 0.56363636 | 0.613468  |
| A_55_P1997 | 57344.8 | Detected   | 45715   | Detected   | 36196.4 | Detected   | 40771.1 | Detected   | Mybl2         | 0.710981641 | 0.63120632 | 0.89185388 | 0.7917839 |
| A_55_P2005 | 52400.5 | Detected   | 42616.8 | Detected   | 44446.8 | Detected   | 37255.5 | Detected   | Ranbp3        | 0.71097604  | 0.84821328 | 0.8741975  | 1.0429408 |
| A_55_P1967 | 12.8    | Not Detect | 27.6    | Detected   | 7.6     | Not Detect | 9.1     | Not Detect | Zmynd15       | 0.7109375   | 0.59375    | 0.32971014 | 0.2753623 |
| A_55_P2417 | 12.8    | Not Detect | 50.3    | Detected   | 4.9     | Not Detect | 9.1     | Not Detect | 1700040N02Rik | 0.7109375   | 0.3828125  | 0.18091451 | 0.0974155 |
| A_52_P3413 | 144.1   | Detected   | 93.7    | Detected   | 105.7   | Detected   | 102.4   | Detected   | Sos1          | 0.710617627 | 0.73351839 | 1.09284952 | 1.1280683 |
| A_51_P1671 | 2145.5  | Detected   | 1138.7  | Detected   | 2394.9  | Detected   | 1524.6  | Detected   | B3galt4       | 0.710603589 | 1.1162433  | 1.33889523 | 2.1031878 |
| A_55_P2120 | 278.4   | Detected   | 268.7   | Detected   | 298     | Detected   | 197.8   | Detected   | Cacna1a       | 0.710488506 | 1.0704023  | 0.73613696 | 1.1090435 |
| A_51_P4245 | 620.8   | Detected   | 588.1   | Detected   | 263.1   | Detected   | 441     | Detected   | Nin           | 0.710373711 | 0.42380799 | 0.74987247 | 0.4473729 |
| A_52_P7538 | 7438.7  | Detected   | 3420.6  | Detected   | 6392.5  | Detected   | 5284.1  | Detected   | B230219D22Rik | 0.710352615 | 0.85935715 | 1.54478746 | 1.8688242 |
| A_52_P6788 | 7946.4  | Detected   | 6452.8  | Detected   | 5613.6  | Detected   | 5644.7  | Detected   | Dynlt3        | 0.710346824 | 0.7064331  | 0.87476754 | 0.8699479 |
| A_55_P1978 | 2533.4  | Detected   | 1669.2  | Detected   | 6818.6  | Detected   | 1798.8  | Detected   | Slc9a3r2      | 0.710033946 | 2.6914818  | 1.07764198 | 4.0849509 |
| A_55_P2277 | 123.8   | Detected   | 76      | Detected   | 60.8    | Detected   | 87.9    | Detected   | Gm16523       | 0.710016155 | 0.4911147  | 1.15657895 | 0.8       |
| A_55_P1964 | 13.1    | Not Detect | 9.9     | Not Detect | 22.2    | Detected   | 9.3     | Not Detect | BC049635      | 0.709923664 | 1.69465649 | 0.93939394 | 2.2424242 |
| A_55_P1956 | 64839.5 | Detected   | 53994.1 | Detected   | 42658.8 | Detected   | 46030.7 | Detected   | Hnrnp1        | 0.709917566 | 0.65791377 | 0.85251352 | 0.7900641 |
| A_55_P2040 | 152     | Detected   | 124.3   | Detected   | 238.4   | Detected   | 107.9   | Detected   | Gm11744       | 0.709868421 | 1.56842105 | 0.86806114 | 1.9179405 |
| A_55_P2044 | 4891.9  | Detected   | 3349.7  | Detected   | 4958.6  | Detected   | 3472.5  | Detected   | 9930021J03Rik | 0.70984689  | 1.01363478 | 1.03666    | 1.4803117 |
| A_55_P1954 | 12.4    | Not Detect | 23.9    | Detected   | 7.2     | Not Detect | 8.8     | Not Detect | Trpv1         | 0.709677419 | 0.58064516 | 0.36820084 | 0.3012552 |
| A_51_P4437 | 34082.6 | Detected   | 25183.8 | Detected   | 34099.1 | Detected   | 24187.2 | Detected   | Mrps34        | 0.709664169 | 1.00048412 | 0.96042694 | 1.3540093 |
| A_51_P3680 | 8164.3  | Detected   | 3075.6  | Detected   | 6445.4  | Detected   | 5793.1  | Detected   | E2f2          | 0.709564813 | 0.78946144 | 1.88356743 | 2.0956561 |
| A_55_P2171 | 27.2    | Detected   | 26.3    | Detected   | 32.1    | Detected   | 19.3    | Not Detect | Gja3          | 0.709558824 | 1.18014706 | 0.7338403  | 1.2205323 |
| A_55_P2049 | 5165.2  | Detected   | 4727.2  | Detected   | 3721.8  | Detected   | 3665    | Detected   | Araf          | 0.709556261 | 0.72055293 | 0.77530039 | 0.787316  |
| A_55_P2115 | 5068.3  | Detected   | 1812.7  | Detected   | 5722.5  | Detected   | 3596.2  | Detected   | AI661453      | 0.70954758  | 1.12907681 | 1.98389143 | 3.156893  |
| A_55_P2080 | 4004.2  | Detected   | 3430.4  | Detected   | 3143.3  | Detected   | 2840.9  | Detected   | Arhgap26      | 0.709480046 | 0.78500075 | 0.82815415 | 0.9163071 |
| A_52_P4135 | 1584.6  | Detected   | 1096.1  | Detected   | 1310.6  | Detected   | 1124.2  | Detected   | Rtfdc1        | 0.70945349  | 0.8270857  | 1.02563635 | 1.1956938 |
| A_52_P2272 | 177.9   | Detected   | 156.9   | Detected   | 180.8   | Detected   | 126.2   | Detected   | Atp1a2        | 0.709387296 | 1.01630129 | 0.80433397 | 1.1523263 |
| A_52_P6290 | 22805.9 | Detected   | 19378.8 | Detected   | 25035.4 | Detected   | 16176.7 | Detected   | Gm6987        | 0.709320834 | 1.09775979 | 0.83476273 | 1.2918963 |
| A_51_P2612 | 22.7    | Detected   | 8.4     | Not Detect | 13.2    | Not Detect | 16.1    | Not Detect | Foxi2         | 0.709251101 | 0.5814978  | 1.91666667 | 1.5714286 |
| A_55_P2099 | 868.7   | Detected   | 717     | Detected   | 621.9   | Detected   | 616.1   | Detected   | Whsc1         | 0.709220675 | 0.71589732 | 0.85927476 | 0.867364  |
| A_52_P5960 | 922.3   | Detected   | 739.9   | Detected   | 68.1    | Detected   | 654     | Detected   | Zeb2          | 0.709096823 | 0.07383715 | 0.88390323 | 0.0920395 |
| A_55_P2122 | 5495.7  | Detected   | 5722.6  | Detected   | 4286.2  | Detected   | 3896.8  | Detected   | Csnk1e        | 0.70906345  | 0.77991885 | 0.68094922 | 0.7489952 |
| A_51_P2087 | 15633.6 | Detected   | 11745.4 | Detected   | 19018.1 | Detected   | 11085   | Detected   | Metrn         | 0.709049739 | 1.21648884 | 0.94377373 | 1.6191956 |
| A_55_P2240 | 122.3   | Detected   | 85.8    | Detected   | 123.5   | Detected   | 86.7    | Detected   | 2310005E17Rik | 0.70891251  | 1.00981194 | 1.01048951 | 1.4393939 |
| A_51_P4797 | 4323.3  | Detected   | 3493.8  | Detected   | 2220.2  | Detected   | 3064.7  | Detected   | Smtn          | 0.708879791 | 0.5135429  | 0.87718244 | 0.6354685 |
| A_51_P3252 | 71.1    | Detected   | 28.5    | Detected   | 47.4    | Detected   | 50.4    | Not Detect | Lin7b         | 0.708860759 | 0.66666667 | 1.76842105 | 1.6631579 |
| A_52_P2312 | 968.1   | Detected   | 257.6   | Detected   | 791.4   | Detected   | 686.2   | Detected   | Nanos1        | 0.708811073 | 0.81747753 | 2.66381988 | 3.072205  |
| A_52_P5877 | 1573.9  | Detected   | 587.2   | Detected   | 3016.1  | Detected   | 1115.5  | Detected   | P2ry2         | 0.708748968 | 1.91632251 | 1.89969346 | 5.1364101 |
| A_55_P1972 | 84      | Detected   | 66.2    | Detected   | 77.3    | Detected   | 59.5    | Detected   | 0610037L13Rik | 0.708333333 | 0.9202381  | 0.89879154 | 1.1676737 |
| A_55_P1967 | 24      | Detected   | 43.1    | Detected   | 3.8     | Not Detect | 17      | Not Detect | Lrp4          | 0.708333333 | 0.15833333 | 0.39443155 | 0.0881671 |
| A_55_P2080 | 28048.8 | Detected   | 16378.4 | Detected   | 28066.1 | Detected   | 19867.8 | Detected   | Carhsp1       | 0.708329768 | 1.00061678 | 1.21304889 | 1.7136045 |

|            |          |            |          |            |          |            |          |            |               |             |            |            |           |
|------------|----------|------------|----------|------------|----------|------------|----------|------------|---------------|-------------|------------|------------|-----------|
| A_55_P2157 | 2830.8   | Detected   | 1951.1   | Detected   | 2333.5   | Detected   | 2005.1   | Detected   | Gm14410       | 0.70831567  | 0.82432528 | 1.0276767  | 1.195992  |
| A_55_P2108 | 403      | Detected   | 341.7    | Detected   | 340.8    | Detected   | 285.4    | Detected   | Gm7160        | 0.708188586 | 0.84565757 | 0.83523559 | 0.9973661 |
| A_66_P1396 | 49       | Detected   | 51.2     | Detected   | 26.7     | Detected   | 34.7     | Not Detect | Pla2g4c       | 0.708163265 | 0.54489796 | 0.67773438 | 0.5214844 |
| A_52_P6170 | 117.5    | Detected   | 88.7     | Detected   | 100.7    | Detected   | 83.2     | Detected   | Zfp369        | 0.708085106 | 0.85702128 | 0.93799324 | 1.1352875 |
| A_51_P2833 | 245.7    | Detected   | 299.6    | Detected   | 162.8    | Detected   | 173.9    | Detected   | Cacnb2        | 0.707773708 | 0.66259666 | 0.58044059 | 0.5433912 |
| A_51_P3595 | 2930.8   | Detected   | 2450.9   | Detected   | 3040     | Detected   | 2074.3   | Detected   | Fem1c         | 0.707758974 | 1.03725945 | 0.84634216 | 1.2403607 |
| A_55_P1972 | 50120.6  | Detected   | 28823.7  | Detected   | 31522.5  | Detected   | 35465.7  | Detected   | Btg3          | 0.707607251 | 0.62893301 | 1.23043537 | 1.0936313 |
| A_55_P2157 | 17.1     | Detected   | 9.5      | Not Detect | 5.8      | Not Detect | 12.1     | Not Detect | Gfap          | 0.707602339 | 0.33918129 | 1.27368421 | 0.6105263 |
| A_66_P1045 | 15135    | Detected   | 9206.2   | Detected   | 12106.8  | Detected   | 10705.8  | Detected   | Tbl1x         | 0.707353816 | 0.79992071 | 1.16289023 | 1.3150703 |
| A_55_P2003 | 36.9     | Detected   | 23.3     | Detected   | 30.4     | Detected   | 26.1     | Not Detect | Nr6a1         | 0.707317073 | 0.82384824 | 1.12017167 | 1.304721  |
| A_55_P2278 | 41       | Detected   | 23.1     | Detected   | 46.4     | Detected   | 29       | Not Detect | 1700037F03Rik | 0.707317073 | 1.13170732 | 1.25541126 | 2.008658  |
| A_55_P2062 | 12.3     | Not Detect | 10.9     | Not Detect | 18.1     | Detected   | 8.7      | Not Detect | Gm3099        | 0.707317073 | 1.47154472 | 0.79816514 | 1.6605505 |
| A_55_P2129 | 1605.7   | Detected   | 1005.7   | Detected   | 1210.3   | Detected   | 1135.6   | Detected   | Dclre1c       | 0.707230491 | 0.75375226 | 1.12916377 | 1.2034404 |
| A_51_P1125 | 28871.5  | Detected   | 25209.3  | Detected   | 29516.1  | Detected   | 20417.7  | Detected   | Polr1c        | 0.707192214 | 1.02232652 | 0.80992729 | 1.1708417 |
| A_52_P6902 | 461      | Detected   | 409.5    | Detected   | 237.4    | Detected   | 325.9    | Detected   | Slc24a5       | 0.706941432 | 0.51496746 | 0.7958486  | 0.5797314 |
| A_66_P1257 | 1677.3   | Detected   | 1329.7   | Detected   | 1046.7   | Detected   | 1185.6   | Detected   | Tnip2         | 0.706850295 | 0.62403863 | 0.89162969 | 0.78717   |
| A_52_P4452 | 1091.8   | Detected   | 730.8    | Detected   | 479.1    | Detected   | 771.7    | Detected   | Dst           | 0.706814435 | 0.43881663 | 1.05596606 | 0.6555829 |
| A_55_P2031 | 210600.1 | Detected   | 139832.5 | Detected   | 161084.3 | Detected   | 148852.4 | Detected   | Hnrnpa3       | 0.706801184 | 0.76488235 | 1.06450503 | 1.1519804 |
| A_55_P1984 | 93.1     | Detected   | 135.4    | Detected   | 46.7     | Detected   | 65.8     | Detected   | Wnt5b         | 0.706766917 | 0.50161117 | 0.4859675  | 0.344904  |
| A_52_P1047 | 1087     | Detected   | 741.9    | Detected   | 840.4    | Detected   | 768.2    | Detected   | Rlim          | 0.706715731 | 0.77313707 | 1.03544952 | 1.1327672 |
| A_55_P2055 | 91510.6  | Detected   | 80153    | Detected   | 89833.9  | Detected   | 64667.2  | Detected   | Uqcc2         | 0.70666349  | 0.98167753 | 0.806797   | 1.1207803 |
| A_52_P3356 | 2743.2   | Detected   | 1700.7   | Detected   | 2009.8   | Detected   | 1938.4   | Detected   | Idnk          | 0.706620006 | 0.732648   | 1.13976598 | 1.1817487 |
| A_52_P5097 | 22785.5  | Detected   | 18947.8  | Detected   | 14075.5  | Detected   | 16100.3  | Detected   | Zwint         | 0.706602883 | 0.61773935 | 0.8497187  | 0.7428567 |
| A_51_P5089 | 33.4     | Detected   | 34.6     | Detected   | 32.9     | Detected   | 23.6     | Not Detect | Tas1r1        | 0.706586826 | 0.98502994 | 0.68208092 | 0.9508671 |
| A_55_P2150 | 36.1     | Detected   | 29.8     | Detected   | 34.4     | Detected   | 25.5     | Not Detect | Cpne5         | 0.706371191 | 0.95290859 | 0.8557047  | 1.1543624 |
| A_51_P4489 | 12.6     | Not Detect | 20.8     | Detected   | 9.5      | Not Detect | 8.9      | Not Detect | Sncb          | 0.706349206 | 0.75396825 | 0.42788462 | 0.4567308 |
| A_52_P8368 | 24.5     | Detected   | 17.6     | Detected   | 71.2     | Detected   | 17.3     | Not Detect | Txx           | 0.706122449 | 2.90612245 | 0.98295455 | 4.0454545 |
| A_52_P3426 | 805      | Detected   | 818.2    | Detected   | 659.9    | Detected   | 568.4    | Detected   | Csrnp2        | 0.706086957 | 0.81975155 | 0.69469567 | 0.8065265 |
| A_55_P2049 | 6432.5   | Detected   | 4747.9   | Detected   | 3991.5   | Detected   | 4541.7   | Detected   | Phtf1         | 0.706055188 | 0.62052079 | 0.95657027 | 0.8406875 |
| A_55_P1980 | 376.6    | Detected   | 303.4    | Detected   | 180.1    | Detected   | 265.9    | Detected   | Cetn4         | 0.706054169 | 0.47822623 | 0.87640079 | 0.5936058 |
| A_52_P2659 | 36.4     | Detected   | 17.5     | Not Detect | 18       | Not Detect | 25.7     | Not Detect | Tagln3        | 0.706043956 | 0.49450549 | 1.46857143 | 1.0285714 |
| A_55_P1976 | 25.5     | Detected   | 27.3     | Detected   | 25.3     | Detected   | 18       | Not Detect | Tgm4          | 0.705882353 | 0.99215686 | 0.65934066 | 0.9267399 |
| A_51_P3919 | 15546.9  | Detected   | 10619.4  | Detected   | 14299.7  | Detected   | 10973.5  | Detected   | Ubxn6         | 0.705832031 | 0.91977822 | 1.03334463 | 1.3465638 |
| A_55_P2117 | 564.3    | Detected   | 497.9    | Detected   | 664.9    | Detected   | 398.3    | Detected   | Ppih          | 0.705830232 | 1.17827397 | 0.79995983 | 1.3354087 |
| A_51_P4080 | 7381.6   | Detected   | 5390.2   | Detected   | 4570     | Detected   | 5209.5   | Detected   | Kntc1         | 0.705741303 | 0.61910697 | 0.9664762  | 0.847835  |
| A_55_P1953 | 14.6     | Not Detect | 12.9     | Not Detect | 18.8     | Detected   | 10.3     | Not Detect | Tnfsf12       | 0.705479452 | 1.28767123 | 0.79844961 | 1.4573643 |
| A_51_P1294 | 339.5    | Detected   | 277.2    | Detected   | 317.1    | Detected   | 239.5    | Detected   | Arid2         | 0.70544919  | 0.93402062 | 0.86399711 | 1.1439394 |
| A_55_P2030 | 641.2    | Detected   | 276.9    | Detected   | 602.5    | Detected   | 452.2    | Detected   | Tcf7l2        | 0.705240175 | 0.93964442 | 1.63308053 | 2.1758758 |
| A_51_P4079 | 1699.7   | Detected   | 1186.4   | Detected   | 1178.8   | Detected   | 1198.6   | Detected   | 1500011B03Rik | 0.705183268 | 0.69353415 | 1.01028321 | 0.9935941 |
| A_52_P5125 | 135.3    | Detected   | 89.3     | Detected   | 84.9     | Detected   | 95.4     | Detected   | Cdc7          | 0.705099778 | 0.62749446 | 1.06830907 | 0.9507279 |

|            |         |            |         |            |         |            |         |            |               |             |            |            |           |
|------------|---------|------------|---------|------------|---------|------------|---------|------------|---------------|-------------|------------|------------|-----------|
| A_52_P3312 | 1787.1  | Detected   | 1180.1  | Detected   | 1416.1  | Detected   | 1259.6  | Detected   | Cspp1         | 0.704829053 | 0.7924011  | 1.06736717 | 1.1999831 |
| A_52_P3574 | 6821.5  | Detected   | 5466.5  | Detected   | 5915.3  | Detected   | 4807.9  | Detected   | Mlst8         | 0.704815656 | 0.86715532 | 0.87952072 | 1.0821001 |
| A_52_P5563 | 243.9   | Detected   | 145.8   | Detected   | 303.6   | Detected   | 171.9   | Detected   | Ralgapa2      | 0.704797048 | 1.24477245 | 1.17901235 | 2.0823045 |
| A_51_P4762 | 192     | Detected   | 111.6   | Detected   | 108.5   | Detected   | 135.3   | Detected   | Fscn3         | 0.7046875   | 0.56510417 | 1.21236559 | 0.9722222 |
| A_51_P4189 | 1361.5  | Detected   | 1399    | Detected   | 1195.9  | Detected   | 959.4   | Detected   | Neur12        | 0.704663974 | 0.87836945 | 0.68577555 | 0.8548249 |
| A_66_P1022 | 9064    | Detected   | 4899.8  | Detected   | 4170.4  | Detected   | 6386.5  | Detected   | Irs2          | 0.704600618 | 0.46010591 | 1.30342055 | 0.8511368 |
| A_55_P2177 | 15.9    | Detected   | 20.9    | Detected   | 15.3    | Not Detect | 11.2    | Not Detect | Gm7166        | 0.704402516 | 0.96226415 | 0.53588517 | 0.7320574 |
| A_55_P2073 | 180.6   | Detected   | 113.1   | Detected   | 122.4   | Detected   | 127.2   | Detected   | Chd6          | 0.704318937 | 0.67774086 | 1.12466844 | 1.0822281 |
| A_66_P1052 | 686.7   | Detected   | 597.1   | Detected   | 592.9   | Detected   | 483.6   | Detected   | Tor1aip1      | 0.704237658 | 0.86340469 | 0.80991459 | 0.992966  |
| A_51_P4170 | 899.4   | Detected   | 1385.9  | Detected   | 1876.5  | Detected   | 633.3   | Detected   | Arhgap8       | 0.704136091 | 2.08639093 | 0.45695938 | 1.3539938 |
| A_52_P5160 | 2450.2  | Detected   | 1540.7  | Detected   | 1971.3  | Detected   | 1724.6  | Detected   | Ptpn1         | 0.703860909 | 0.80454657 | 1.11936133 | 1.2794834 |
| A_55_P2097 | 18517.9 | Detected   | 12182.5 | Detected   | 9697.2  | Detected   | 13032.8 | Detected   | Eid1          | 0.703794707 | 0.52366629 | 1.06979684 | 0.7959943 |
| A_55_P2084 | 17485.6 | Detected   | 15851.3 | Detected   | 13950.4 | Detected   | 12304.1 | Detected   | Kcna4         | 0.703670449 | 0.79782221 | 0.77622025 | 0.8800792 |
| A_55_P2155 | 1437.4  | Detected   | 1188.5  | Detected   | 1579.1  | Detected   | 1011.4  | Detected   | Naa40         | 0.703631557 | 1.09858077 | 0.85098864 | 1.3286496 |
| A_52_P2238 | 645.1   | Detected   | 468.2   | Detected   | 472.9   | Detected   | 453.9   | Detected   | Gm6712        | 0.703611843 | 0.73306464 | 0.9694575  | 1.0100384 |
| A_52_P8651 | 2785.9  | Detected   | 2810.6  | Detected   | 2813.5  | Detected   | 1959.9  | Detected   | Cbwd1         | 0.703506946 | 1.00990703 | 0.69732441 | 1.0010318 |
| A_52_P1080 | 3446.5  | Detected   | 2529.9  | Detected   | 2073.7  | Detected   | 2424.6  | Detected   | BC030336      | 0.703496301 | 0.60168287 | 0.9583778  | 0.8196767 |
| A_51_P1742 | 31.7    | Detected   | 39.8    | Detected   | 33      | Detected   | 22.3    | Not Detect | Colec11       | 0.703470032 | 1.04100946 | 0.56030151 | 0.8291457 |
| A_55_P2003 | 14.5    | Not Detect | 20.5    | Detected   | 15.3    | Not Detect | 10.2    | Not Detect | H2-T24        | 0.703448276 | 1.05517241 | 0.49756098 | 0.7463415 |
| A_55_P1992 | 33196.5 | Detected   | 19609.9 | Detected   | 25653.4 | Detected   | 23350.7 | Detected   | Ptpn1         | 0.703408492 | 0.77277424 | 1.19076079 | 1.3081862 |
| A_52_P5177 | 1161.5  | Detected   | 852.2   | Detected   | 1075.7  | Detected   | 817     | Detected   | Creb1         | 0.703400775 | 0.92613    | 0.95869514 | 1.2622624 |
| A_55_P2142 | 631.3   | Detected   | 644.7   | Detected   | 741.4   | Detected   | 444     | Detected   | Cacna1a       | 0.703310629 | 1.17440203 | 0.68869242 | 1.1499922 |
| A_55_P2199 | 160.4   | Detected   | 122.8   | Detected   | 98      | Detected   | 112.8   | Detected   | 2810002D19Rik | 0.703241895 | 0.61097257 | 0.91856678 | 0.7980456 |
| A_51_P4329 | 12.8    | Not Detect | 7.5     | Not Detect | 20.2    | Detected   | 9       | Not Detect | Npas3         | 0.703125    | 1.578125   | 1.2        | 2.6933333 |
| A_55_P1982 | 12.8    | Not Detect | 10.7    | Not Detect | 17.9    | Detected   | 9       | Not Detect | Frmd4a        | 0.703125    | 1.3984375  | 0.8411215  | 1.6728972 |
| A_52_P2642 | 2473.5  | Detected   | 1836.8  | Detected   | 1890.5  | Detected   | 1738.9  | Detected   | Ing5          | 0.703011926 | 0.7643016  | 0.94670078 | 1.0292356 |
| A_55_P2148 | 444.7   | Detected   | 471.5   | Detected   | 415.3   | Detected   | 312.6   | Detected   | Tsr3          | 0.702945806 | 0.93388801 | 0.66299046 | 0.8808059 |
| A_55_P2013 | 24754.7 | Detected   | 16961   | Detected   | 12599.4 | Detected   | 17401   | Detected   | Serpnb6b      | 0.70293722  | 0.50897001 | 1.02594187 | 0.7428454 |
| A_55_P2111 | 453.4   | Detected   | 430.6   | Detected   | 338.2   | Detected   | 318.7   | Detected   | Cbx6          | 0.702911337 | 0.74591972 | 0.74013005 | 0.7854157 |
| A_55_P2350 | 17.5    | Detected   | 21.3    | Detected   | 24.6    | Detected   | 12.3    | Not Detect | 5033404E19Rik | 0.702857143 | 1.40571429 | 0.57746479 | 1.1549296 |
| A_55_P2128 | 4423.4  | Detected   | 2785.9  | Detected   | 3625.1  | Detected   | 3108.7  | Detected   | Phf21a        | 0.702785188 | 0.81952796 | 1.1158692  | 1.3012312 |
| A_55_P2093 | 5468.4  | Detected   | 3482.6  | Detected   | 6773.7  | Detected   | 3842.9  | Detected   | Usp3          | 0.70274669  | 1.23869871 | 1.10345719 | 1.9450123 |
| A_51_P5004 | 18091.1 | Detected   | 10872.2 | Detected   | 15264.6 | Detected   | 12709.9 | Detected   | Dnrtip1       | 0.702549873 | 0.84376296 | 1.16902743 | 1.4040029 |
| A_55_P2067 | 12095.4 | Detected   | 8400.8  | Detected   | 11032.7 | Detected   | 8493.4  | Detected   | 5-Mar         | 0.702200837 | 0.91214015 | 1.01102276 | 1.3132916 |
| A_52_P3901 | 3112.2  | Detected   | 2804.3  | Detected   | 2515.2  | Detected   | 2185.3  | Detected   | Eif4b         | 0.702172097 | 0.80817428 | 0.77926755 | 0.8969083 |
| A_52_P6313 | 488.1   | Detected   | 239.2   | Detected   | 358.8   | Detected   | 342.6   | Detected   | Cobll1        | 0.701905347 | 0.73509527 | 1.43227425 | 1.5       |
| A_51_P2976 | 22916   | Detected   | 16924.2 | Detected   | 20240.2 | Detected   | 16084.6 | Detected   | Prpf6         | 0.701893873 | 0.88323442 | 0.95039056 | 1.1959325 |
| A_55_P2106 | 540.4   | Detected   | 312.7   | Detected   | 418.1   | Detected   | 379.3   | Detected   | 2900097C17Rik | 0.701887491 | 0.77368616 | 1.21298369 | 1.3370643 |
| A_51_P2627 | 34.2    | Detected   | 30.3    | Detected   | 23.8    | Detected   | 24      | Not Detect | Cpb2          | 0.701754386 | 0.69590643 | 0.79207921 | 0.7854785 |
| A_66_P1269 | 34.2    | Detected   | 35      | Detected   | 25.2    | Detected   | 24      | Not Detect | 8430423G03Rik | 0.701754386 | 0.73684211 | 0.68571429 | 0.72      |

|            |         |            |         |            |         |            |         |            |               |             |            |            |           |
|------------|---------|------------|---------|------------|---------|------------|---------|------------|---------------|-------------|------------|------------|-----------|
| A_52_P4329 | 1705.6  | Detected   | 1284.4  | Detected   | 1684.7  | Detected   | 1196.9  | Detected   | Ddx11         | 0.701747186 | 0.98774625 | 0.93187481 | 1.311663  |
| A_55_P2342 | 23.8    | Detected   | 27.6    | Detected   | 26.1    | Detected   | 16.7    | Not Detect | 1700125G22Rik | 0.701680672 | 1.09663866 | 0.60507246 | 0.9456522 |
| A_51_P4817 | 23.8    | Detected   | 67.9    | Detected   | 23.1    | Detected   | 16.7    | Not Detect | Tcstv1        | 0.701680672 | 0.97058824 | 0.24594993 | 0.3402062 |
| A_66_P1374 | 26.8    | Detected   | 23      | Detected   | 11.2    | Not Detect | 18.8    | Not Detect | Zfp951        | 0.701492537 | 0.41791045 | 0.8173913  | 0.4869565 |
| A_55_P1960 | 2398.3  | Detected   | 1788.1  | Detected   | 2585.1  | Detected   | 1682.2  | Detected   | Trpt1         | 0.701413501 | 1.0778885  | 0.94077512 | 1.4457245 |
| A_55_P2068 | 22.1    | Detected   | 19.5    | Detected   | 17.8    | Detected   | 15.5    | Not Detect | Vmn1r203      | 0.701357466 | 0.80542986 | 0.79487179 | 0.9128205 |
| A_55_P1983 | 4872.1  | Detected   | 4304.4  | Detected   | 3791.3  | Detected   | 3416.9  | Detected   | Desi1         | 0.701319759 | 0.77816547 | 0.79381563 | 0.8807964 |
| A_55_P2125 | 466.8   | Detected   | 300.4   | Detected   | 371.7   | Detected   | 327.3   | Detected   | Adam26b       | 0.701156812 | 0.79627249 | 1.08954727 | 1.2373502 |
| A_52_P4750 | 307.5   | Detected   | 230.4   | Detected   | 277.9   | Detected   | 215.6   | Detected   | Arsk          | 0.701138211 | 0.90373984 | 0.93576389 | 1.2061632 |
| A_55_P2021 | 53.2    | Detected   | 41.8    | Detected   | 31.2    | Detected   | 37.3    | Not Detect | Celf4         | 0.70112782  | 0.58646617 | 0.8923445  | 0.7464115 |
| A_55_P2305 | 55.2    | Detected   | 59.6    | Detected   | 58.2    | Detected   | 38.7    | Not Detect | A430105J06Rik | 0.701086957 | 1.05434783 | 0.64932886 | 0.9765101 |
| A_55_P2100 | 117.4   | Detected   | 119.4   | Detected   | 93.1    | Detected   | 82.3    | Detected   | Auh           | 0.701022147 | 0.79301533 | 0.68927973 | 0.779732  |
| A_55_P2011 | 86333.6 | Detected   | 51220.6 | Detected   | 46024.5 | Detected   | 60517.6 | Detected   | Gm11223       | 0.700973897 | 0.53310067 | 1.181509   | 0.8985545 |
| A_55_P1973 | 41.8    | Detected   | 38.4    | Detected   | 22.4    | Detected   | 29.3    | Not Detect | Ltbp1         | 0.700956938 | 0.53588517 | 0.76302083 | 0.5833333 |
| A_55_P1995 | 2722    | Detected   | 1889.5  | Detected   | 2198.3  | Detected   | 1907.9  | Detected   | Gm14322       | 0.700918442 | 0.8076047  | 1.00973803 | 1.1634295 |
| A_52_P1175 | 1008.9  | Detected   | 904.9   | Detected   | 662.8   | Detected   | 707.1   | Detected   | Casp3         | 0.700862325 | 0.65695312 | 0.78141231 | 0.7324566 |
| A_65_P0876 | 2424.4  | Detected   | 456.2   | Detected   | 2861.2  | Detected   | 1699    | Detected   | Fbln1         | 0.700791949 | 1.18016829 | 3.72424375 | 6.2718106 |
| A_55_P2150 | 12.7    | Not Detect | 36.1    | Detected   | 10.7    | Not Detect | 8.9     | Not Detect | Cpne4         | 0.700787402 | 0.84251969 | 0.2465374  | 0.2963989 |
| A_51_P4928 | 7640.4  | Detected   | 6373    | Detected   | 5671.9  | Detected   | 5354    | Detected   | Cenph         | 0.700748652 | 0.74235642 | 0.8401067  | 0.889989  |
| A_55_P1978 | 1981.2  | Detected   | 968.7   | Detected   | 1821.4  | Detected   | 1388    | Detected   | Dcaf17        | 0.700585504 | 0.91934181 | 1.43284815 | 1.8802519 |
| A_65_P1551 | 1221.7  | Detected   | 835.6   | Detected   | 849     | Detected   | 855.9   | Detected   | Arfgap1       | 0.700581157 | 0.69493329 | 1.02429392 | 1.0160364 |
| A_52_P1896 | 35.4    | Detected   | 28.2    | Detected   | 31.4    | Detected   | 24.8    | Not Detect | Olf1559       | 0.700564972 | 0.88700565 | 0.87943262 | 1.1134752 |
| A_55_P2371 | 151.6   | Detected   | 87.6    | Detected   | 89.9    | Detected   | 106.2   | Detected   | 5930436O19Rik | 0.700527704 | 0.59300792 | 1.21232877 | 1.0262557 |
| A_55_P2071 | 58.1    | Detected   | 55.9    | Detected   | 59.4    | Detected   | 40.7    | Not Detect | Il21r         | 0.700516351 | 1.02237522 | 0.72808587 | 1.0626118 |
| A_51_P2373 | 33.7    | Detected   | 23      | Detected   | 21.4    | Detected   | 23.6    | Not Detect | Olf1509       | 0.700296736 | 0.63501484 | 1.02608696 | 0.9304348 |
| A_55_P1988 | 36      | Detected   | 16.3    | Not Detect | 25.1    | Detected   | 25.2    | Not Detect | Ms4a4b        | 0.7         | 0.69722222 | 1.54601227 | 1.5398773 |
| A_55_P2103 | 21      | Detected   | 11.6    | Not Detect | 14.2    | Not Detect | 14.7    | Not Detect | Bhmt          | 0.7         | 0.67619048 | 1.26724138 | 1.2241379 |
| A_55_P2374 | 15      | Detected   | 14.2    | Not Detect | 10.6    | Not Detect | 10.5    | Not Detect | D9Erd788e     | 0.7         | 0.70666667 | 0.73943662 | 0.7464789 |
| A_55_P2151 | 3423.1  | Detected   | 2811.6  | Detected   | 3468.9  | Detected   | 2395.4  | Detected   | Matr3         | 0.699775058 | 1.01337969 | 0.85197041 | 1.2337815 |
| A_55_P2046 | 1572.2  | Detected   | 930.3   | Detected   | 1235.6  | Detected   | 1100.1  | Detected   | Slc25a25      | 0.699720137 | 0.7859051  | 1.18252177 | 1.3281737 |
| A_55_P2121 | 79126.5 | Detected   | 59137   | Detected   | 64261.8 | Detected   | 55365.3 | Detected   | Psmc3         | 0.699706167 | 0.81214005 | 0.93622098 | 1.0866598 |
| A_52_P5182 | 825.6   | Detected   | 550.1   | Detected   | 823.4   | Detected   | 577.6   | Detected   | Ndr3          | 0.699612403 | 0.99733527 | 1.04999091 | 1.4968188 |
| A_51_P3917 | 21216.9 | Detected   | 18862.2 | Detected   | 17290.3 | Detected   | 14843.4 | Detected   | Cbx6          | 0.699602675 | 0.81493055 | 0.78693896 | 0.916664  |
| A_52_P5616 | 1812.2  | Detected   | 1057.4  | Detected   | 87.8    | Detected   | 1267.7  | Detected   | Msx1          | 0.699536475 | 0.0484494  | 1.19888406 | 0.0830339 |
| A_55_P2143 | 331.8   | Detected   | 143.7   | Detected   | 343.9   | Detected   | 232.1   | Detected   | Gm5784        | 0.699517782 | 1.03646775 | 1.61517049 | 2.3931802 |
| A_52_P3550 | 29116.3 | Detected   | 26195.8 | Detected   | 26677.6 | Detected   | 20364.5 | Detected   | Wdr4          | 0.699419226 | 0.91624279 | 0.77739561 | 1.0183923 |
| A_55_P1978 | 817.3   | Detected   | 583.9   | Detected   | 646.5   | Detected   | 571.6   | Detected   | Trp53bp2      | 0.699375994 | 0.79101921 | 0.97893475 | 1.1072101 |
| A_55_P1960 | 4089.7  | Detected   | 4238.2  | Detected   | 2208.1  | Detected   | 2860.2  | Detected   | Slc16a13      | 0.699366702 | 0.53991735 | 0.67486197 | 0.5209995 |
| A_51_P1155 | 29.6    | Detected   | 21.5    | Detected   | 9.7     | Not Detect | 20.7    | Not Detect | Olf1339       | 0.699324324 | 0.3277027  | 0.9627907  | 0.4511628 |
| A_55_P2018 | 15767.7 | Detected   | 15103.8 | Detected   | 18107.7 | Detected   | 11025.9 | Detected   | 2410127L17Rik | 0.699271295 | 1.14840465 | 0.73000834 | 1.1988837 |

|            |         |            |         |            |         |            |         |            |               |             |            |            |           |
|------------|---------|------------|---------|------------|---------|------------|---------|------------|---------------|-------------|------------|------------|-----------|
| A_55_P2092 | 47621.8 | Detected   | 34994.3 | Detected   | 39343.7 | Detected   | 33299.7 | Detected   | Adrm1         | 0.699253283 | 0.82616995 | 0.95157497 | 1.1242888 |
| A_55_P2112 | 53.2    | Detected   | 46.1    | Detected   | 16.7    | Not Detect | 37.2    | Not Detect | Ern1          | 0.69924812  | 0.31390977 | 0.80694143 | 0.362256  |
| A_55_P2062 | 180.7   | Detected   | 223.2   | Detected   | 84.5    | Detected   | 126.3   | Detected   | Tgtp2         | 0.698948533 | 0.4676259  | 0.56586022 | 0.3785842 |
| A_55_P2060 | 1404.4  | Detected   | 911.7   | Detected   | 1306.6  | Detected   | 981.6   | Detected   | Hira          | 0.698946169 | 0.93036172 | 1.07666996 | 1.4331469 |
| A_55_P2322 | 17.6    | Detected   | 15.7    | Not Detect | 12.4    | Not Detect | 12.3    | Not Detect | A130042O14Rik | 0.698863636 | 0.70454545 | 0.78343949 | 0.7898089 |
| A_52_P6017 | 138.1   | Detected   | 136.3   | Detected   | 60.1    | Detected   | 96.5    | Detected   | Mb21d1        | 0.698769008 | 0.43519189 | 0.70799707 | 0.4409391 |
| A_66_P1234 | 10641.5 | Detected   | 7129.9  | Detected   | 10395.4 | Detected   | 7433.9  | Detected   | Pigx          | 0.698576329 | 0.97687356 | 1.04263734 | 1.4580008 |
| A_55_P2154 | 60835.1 | Detected   | 43052.3 | Detected   | 20694.9 | Detected   | 42492.6 | Detected   | Bmp4          | 0.698488208 | 0.34018026 | 0.98699953 | 0.4806921 |
| A_55_P2164 | 419.5   | Detected   | 405.3   | Detected   | 330.6   | Detected   | 293     | Detected   | Raet1a        | 0.698450536 | 0.78808105 | 0.72292129 | 0.8156921 |
| A_52_P5983 | 22143.5 | Detected   | 21109   | Detected   | 18348.8 | Detected   | 15465.1 | Detected   | 1500012F01Rik | 0.698403595 | 0.82863143 | 0.73263063 | 0.8692406 |
| A_55_P1953 | 33752.8 | Detected   | 19877.1 | Detected   | 18987.6 | Detected   | 23572.7 | Detected   | Zdhhc18       | 0.69839243  | 0.56254888 | 1.18592249 | 0.95525   |
| A_55_P2085 | 48981.4 | Detected   | 34841.1 | Detected   | 30243.3 | Detected   | 34201.7 | Detected   | Inf2          | 0.698258931 | 0.61744458 | 0.98164811 | 0.8680352 |
| A_55_P2160 | 51      | Detected   | 88.2    | Detected   | 46.5    | Detected   | 35.6    | Not Detect | Faim2         | 0.698039216 | 0.91176471 | 0.40362812 | 0.5272109 |
| A_52_P4496 | 867.5   | Detected   | 679     | Detected   | 525.9   | Detected   | 605.5   | Detected   | LOC668643     | 0.697982709 | 0.60622478 | 0.89175258 | 0.7745214 |
| A_51_P1942 | 85.4    | Detected   | 60.5    | Detected   | 57.1    | Detected   | 59.6    | Detected   | Sgcg          | 0.697892272 | 0.66861827 | 0.98512397 | 0.9438017 |
| A_55_P2178 | 59566.9 | Detected   | 67102.7 | Detected   | 45590.3 | Detected   | 41562.2 | Detected   | Ywhaq         | 0.697739852 | 0.76536298 | 0.61938193 | 0.6794108 |
| A_55_P1994 | 19025.9 | Detected   | 12189.5 | Detected   | 19085.5 | Detected   | 13274.9 | Detected   | Tpd52l2       | 0.697727834 | 1.00313257 | 1.08904385 | 1.5657328 |
| A_51_P3429 | 222.3   | Detected   | 1199.9  | Detected   | 3.6     | Not Detect | 155.1   | Detected   | Omd           | 0.697705803 | 0.01619433 | 0.12926077 | 0.0030003 |
| A_55_P1992 | 1217.6  | Detected   | 508.6   | Detected   | 1131.1  | Detected   | 849.5   | Detected   | Ptprj         | 0.697683968 | 0.92895861 | 1.67027133 | 2.2239481 |
| A_55_P2107 | 11.9    | Not Detect | 38.3    | Detected   | 3.2     | Not Detect | 8.3     | Not Detect | Olf323        | 0.697478992 | 0.26890756 | 0.21671018 | 0.0835509 |
| A_55_P2012 | 65.1    | Detected   | 39.8    | Detected   | 33.3    | Detected   | 45.4    | Not Detect | Arid5b        | 0.697388633 | 0.51152074 | 1.14070352 | 0.8366834 |
| A_55_P1957 | 348.3   | Detected   | 264.9   | Detected   | 336.2   | Detected   | 242.9   | Detected   | Cpeb3         | 0.69738731  | 0.96525983 | 0.91694979 | 1.2691582 |
| A_52_P4817 | 369.4   | Detected   | 275.2   | Detected   | 396.1   | Detected   | 257.6   | Detected   | Cep78         | 0.697347049 | 1.07227937 | 0.93604651 | 1.4393169 |
| A_52_P2176 | 842.1   | Detected   | 682.6   | Detected   | 528.5   | Detected   | 587.2   | Detected   | Ankrd32       | 0.697304358 | 0.62759767 | 0.86024026 | 0.7742455 |
| A_55_P1963 | 240.8   | Detected   | 795.2   | Detected   | 101.4   | Detected   | 167.9   | Detected   | Gpc4          | 0.697259136 | 0.42109635 | 0.21114185 | 0.1275151 |
| A_55_P2128 | 4207.2  | Detected   | 1738    | Detected   | 5291.1  | Detected   | 2933.1  | Detected   | Nr1h3         | 0.697162008 | 1.25762978 | 1.68762946 | 3.0443613 |
| A_52_P4560 | 15739.4 | Detected   | 15037.2 | Detected   | 16768.5 | Detected   | 10969.9 | Detected   | Pfdn1         | 0.69697066  | 1.06538369 | 0.72951746 | 1.1151345 |
| A_52_P9950 | 794.4   | Detected   | 569.8   | Detected   | 937.4   | Detected   | 553.4   | Detected   | Scrn3         | 0.696626385 | 1.18001007 | 0.97121797 | 1.6451386 |
| A_55_P2140 | 731.4   | Detected   | 1001.7  | Detected   | 701.6   | Detected   | 509.5   | Detected   | Cyp21a1       | 0.696609243 | 0.95925622 | 0.50863532 | 0.7004093 |
| A_55_P2116 | 37.9    | Detected   | 32.4    | Detected   | 42      | Detected   | 26.4    | Not Detect | AY074887      | 0.696569921 | 1.10817942 | 0.81481481 | 1.2962963 |
| A_55_P2122 | 26304.9 | Detected   | 19232.7 | Detected   | 25732   | Detected   | 18322.2 | Detected   | Dtymk         | 0.696531825 | 0.97822079 | 0.95265875 | 1.3379297 |
| A_55_P2086 | 137.4   | Detected   | 92.8    | Detected   | 112.1   | Detected   | 95.7    | Detected   | Fam3a         | 0.69650655  | 0.81586608 | 1.03125    | 1.2079741 |
| A_55_P1968 | 674.4   | Detected   | 489.2   | Detected   | 452.8   | Detected   | 469.6   | Detected   | Hjrp          | 0.696322657 | 0.67141163 | 0.95993459 | 0.9255928 |
| A_51_P1256 | 5790.7  | Detected   | 5022.8  | Detected   | 4478.5  | Detected   | 4031    | Detected   | Cdca4         | 0.696116186 | 0.77339527 | 0.80254042 | 0.8916341 |
| A_55_P2124 | 3742    | Detected   | 2209.9  | Detected   | 1437.7  | Detected   | 2603.5  | Detected   | Rusc2         | 0.695750935 | 0.38420631 | 1.17810761 | 0.6505724 |
| A_55_P2171 | 18.4    | Detected   | 21.7    | Detected   | 24.8    | Detected   | 12.8    | Not Detect | Ube2t         | 0.695652174 | 1.34782609 | 0.58986175 | 1.1428571 |
| A_51_P1079 | 623.4   | Detected   | 402.5   | Detected   | 564.2   | Detected   | 433.6   | Detected   | Ubr1          | 0.695540584 | 0.90503689 | 1.07726708 | 1.4017391 |
| A_55_P2034 | 1760.9  | Detected   | 1416    | Detected   | 1633.9  | Detected   | 1224.7  | Detected   | 9430008C03Rik | 0.695496621 | 0.92787779 | 0.86490113 | 1.1538842 |
| A_52_P1825 | 2056.8  | Detected   | 1413    | Detected   | 1290.3  | Detected   | 1430.4  | Detected   | Ube2w         | 0.695449242 | 0.62733372 | 1.01231423 | 0.9131635 |
| A_52_P6020 | 27.9    | Detected   | 16.3    | Not Detect | 27.6    | Detected   | 19.4    | Not Detect | Csf1r         | 0.695340502 | 0.98924731 | 1.19018405 | 1.6932515 |

|            |          |            |         |            |         |            |         |            |          |             |            |            |           |
|------------|----------|------------|---------|------------|---------|------------|---------|------------|----------|-------------|------------|------------|-----------|
| A_55_P2095 | 524.1    | Detected   | 456.9   | Detected   | 472.4   | Detected   | 364.4   | Detected   | Gemin6   | 0.695287159 | 0.9013547  | 0.7975487  | 1.0339243 |
| A_66_P1223 | 23.3     | Detected   | 18.6    | Detected   | 6.4     | Not Detect | 16.2    | Not Detect | Gm10091  | 0.69527897  | 0.27467811 | 0.87096774 | 0.344086  |
| A_55_P2305 | 293      | Detected   | 160.2   | Detected   | 97.9    | Detected   | 203.7   | Detected   | D9Wsu90e | 0.695221843 | 0.33412969 | 1.27153558 | 0.6111111 |
| A_55_P2058 | 1147.5   | Detected   | 1080.2  | Detected   | 866.3   | Detected   | 797.7   | Detected   | Raet1c   | 0.695163399 | 0.75494553 | 0.73847436 | 0.8019811 |
| A_55_P1993 | 1160.5   | Detected   | 1470.6  | Detected   | 890.4   | Detected   | 806.4   | Detected   | Npnt     | 0.6948729   | 0.76725549 | 0.54834761 | 0.6054672 |
| A_55_P1957 | 1495.4   | Detected   | 1529.8  | Detected   | 1291.6  | Detected   | 1039.1  | Detected   | Ttll11   | 0.69486425  | 0.86371539 | 0.67923912 | 0.8442934 |
| A_51_P2705 | 1983     | Detected   | 1617    | Detected   | 1543.2  | Detected   | 1377.5  | Detected   | Apitd1   | 0.694654564 | 0.77821483 | 0.85188621 | 0.9543599 |
| A_65_P0661 | 7983.4   | Detected   | 6529.2  | Detected   | 7539.8  | Detected   | 5544.9  | Detected   | Wtap     | 0.694553699 | 0.9444347  | 0.84924646 | 1.1547816 |
| A_55_P2048 | 110923.9 | Detected   | 85550.3 | Detected   | 79995.6 | Detected   | 77024.5 | Detected   | Cdk2ap1  | 0.694390479 | 0.72117551 | 0.90034167 | 0.9350709 |
| A_55_P2026 | 247.7    | Detected   | 215.7   | Detected   | 275     | Detected   | 172     | Detected   | Usp37    | 0.694388373 | 1.11021397 | 0.7974038  | 1.2749189 |
| A_51_P1063 | 863.9    | Detected   | 762.7   | Detected   | 424.9   | Detected   | 599.8   | Detected   | Prkd3    | 0.694293321 | 0.49183933 | 0.78641668 | 0.5570998 |
| A_55_P1984 | 1285.7   | Detected   | 1149    | Detected   | 989.2   | Detected   | 892.6   | Detected   | Desi1    | 0.694252158 | 0.76938633 | 0.77684943 | 0.8609225 |
| A_52_P4800 | 206.6    | Detected   | 278.1   | Detected   | 397.4   | Detected   | 143.4   | Detected   | Col27a1  | 0.694094869 | 1.92352372 | 0.51564186 | 1.4289824 |
| A_55_P2161 | 1447.7   | Detected   | 1057.4  | Detected   | 1183.1  | Detected   | 1004.8  | Detected   | Prr3     | 0.69406645  | 0.81722733 | 0.95025534 | 1.1188765 |
| A_52_P1037 | 13.4     | Not Detect | 3.2     | Not Detect | 32.4    | Detected   | 9.3     | Not Detect | Gm10664  | 0.694029851 | 2.41791045 | 2.90625    | 10.125    |
| A_52_P2973 | 1854.6   | Detected   | 1086.5  | Detected   | 1252.7  | Detected   | 1287    | Detected   | Aida     | 0.693950178 | 0.67545562 | 1.18453751 | 1.1529682 |
| A_55_P2093 | 971.4    | Detected   | 523.8   | Detected   | 797     | Detected   | 674.1   | Detected   | Pip4k2a  | 0.693946881 | 0.82046531 | 1.28694158 | 1.5215731 |
| A_52_P2701 | 11336.3  | Detected   | 9545.9  | Detected   | 7998.6  | Detected   | 7863.9  | Detected   | E2f6     | 0.693691945 | 0.70557413 | 0.8237987  | 0.8379095 |
| A_55_P1994 | 201.3    | Detected   | 125.1   | Detected   | 128     | Detected   | 139.6   | Detected   | Gm5141   | 0.6934923   | 0.63586687 | 1.11590727 | 1.0231815 |
| A_66_P1066 | 14906.5  | Detected   | 9005.6  | Detected   | 8515.9  | Detected   | 10337.4 | Detected   | Camsap1  | 0.693482709 | 0.57128769 | 1.14788576 | 0.9456227 |
| A_55_P2027 | 16.3     | Detected   | 3.3     | Not Detect | 13.5    | Not Detect | 11.3    | Not Detect | Impg2    | 0.693251534 | 0.82822086 | 3.42424242 | 4.0909091 |
| A_51_P1748 | 23569    | Detected   | 20848.3 | Detected   | 16332.8 | Detected   | 16337.4 | Detected   | Maged1   | 0.693173236 | 0.69297806 | 0.78363224 | 0.7834116 |
| A_55_P2019 | 81905.6  | Detected   | 59214.4 | Detected   | 76299.4 | Detected   | 56756.4 | Detected   | Trpc4ap  | 0.692948956 | 0.93155291 | 0.95848983 | 1.2885278 |
| A_55_P2056 | 4225.5   | Detected   | 2529.8  | Detected   | 2953.8  | Detected   | 2928    | Detected   | Kif2a    | 0.692935747 | 0.69904153 | 1.15740375 | 1.1676022 |
| A_55_P2164 | 6059.1   | Detected   | 5675.7  | Detected   | 5404.8  | Detected   | 4198.1  | Detected   | Dtl      | 0.692858675 | 0.89201367 | 0.73966207 | 0.9522702 |
| A_55_P1969 | 242.2    | Detected   | 149.2   | Detected   | 202.2   | Detected   | 167.8   | Detected   | Zfp748   | 0.692815855 | 0.83484723 | 1.12466488 | 1.3552279 |
| A_66_P1236 | 722      | Detected   | 648.7   | Detected   | 620.1   | Detected   | 500.2   | Detected   | Ptbp2    | 0.692797784 | 0.85886427 | 0.77108062 | 0.9559118 |
| A_55_P2105 | 15085.1  | Detected   | 13375.2 | Detected   | 8362    | Detected   | 10448.2 | Detected   | Pdlim7   | 0.692617218 | 0.55432181 | 0.78116215 | 0.6251869 |
| A_55_P2108 | 2159.1   | Detected   | 1408.4  | Detected   | 1635.1  | Detected   | 1495.4  | Detected   | Tubgcp4  | 0.6926034   | 0.75730629 | 1.06177222 | 1.1609628 |
| A_55_P2024 | 1165.9   | Detected   | 1018.2  | Detected   | 1039.3  | Detected   | 807.3   | Detected   | Mthfr    | 0.692426452 | 0.89141436 | 0.79286977 | 1.0207228 |
| A_55_P1952 | 23.4     | Detected   | 18.8    | Detected   | 20.3    | Detected   | 16.2    | Not Detect | Car10    | 0.692307692 | 0.86752137 | 0.86170213 | 1.0797872 |
| A_51_P4432 | 1481.9   | Detected   | 970.7   | Detected   | 1129.3  | Detected   | 1025.9  | Detected   | Decr2    | 0.692286929 | 0.76206222 | 1.05686618 | 1.1633872 |
| A_55_P1956 | 61203.9  | Detected   | 50636.5 | Detected   | 47687   | Detected   | 42370.4 | Detected   | Rab34    | 0.692282681 | 0.77914969 | 0.83675609 | 0.9417515 |
| A_55_P1983 | 8274.9   | Detected   | 6812    | Detected   | 7722.7  | Detected   | 5728.3  | Detected   | Tmed5    | 0.692250057 | 0.93326808 | 0.84091309 | 1.1336905 |
| A_55_P2326 | 3524.6   | Detected   | 2529.8  | Detected   | 2349.8  | Detected   | 2439.7  | Detected   | Ube2i    | 0.692192022 | 0.66668558 | 0.96438454 | 0.9288481 |
| A_51_P1934 | 8272.7   | Detected   | 5850.7  | Detected   | 6409.8  | Detected   | 5725.7  | Detected   | Fbxo21   | 0.692119864 | 0.77481354 | 0.97863504 | 1.0955612 |
| A_51_P4814 | 249.7    | Detected   | 65.4    | Detected   | 357.2   | Detected   | 172.8   | Detected   | Dram1    | 0.692030437 | 1.43051662 | 2.64220183 | 5.4617737 |
| A_51_P2513 | 29153.4  | Detected   | 32591.7 | Detected   | 18912.8 | Detected   | 20172.7 | Detected   | Ctps     | 0.691950167 | 0.64873394 | 0.61895206 | 0.580295  |
| A_51_P2759 | 3575.5   | Detected   | 3087.6  | Detected   | 3994.4  | Detected   | 2473.9  | Detected   | Loxl2    | 0.69190323  | 1.11715844 | 0.80123721 | 1.2936909 |
| A_55_P1959 | 59059.6  | Detected   | 35281   | Detected   | 46993.2 | Detected   | 40860.8 | Detected   | Dnpep    | 0.691857039 | 0.79569113 | 1.15815311 | 1.331969  |



|            |          |          |         |            |         |            |         |            |               |             |            |            |           |
|------------|----------|----------|---------|------------|---------|------------|---------|------------|---------------|-------------|------------|------------|-----------|
| A_55_P2170 | 63.9     | Detected | 50      | Detected   | 45.9    | Detected   | 44.2    | Not Detect | Gm5115        | 0.69170579  | 0.71830986 | 0.884      | 0.918     |
| A_51_P2952 | 779.4    | Detected | 1628.8  | Detected   | 640.7   | Detected   | 539.1   | Detected   | Lrp11         | 0.691685912 | 0.8220426  | 0.33097986 | 0.3933571 |
| A_55_P2211 | 49.6     | Detected | 19.4    | Detected   | 69.3    | Detected   | 34.3    | Not Detect | 9430018G01Rik | 0.691532258 | 1.39717742 | 1.76804124 | 3.5721649 |
| A_55_P2002 | 18.8     | Detected | 14.8    | Not Detect | 9.1     | Not Detect | 13      | Not Detect | 1810053B23Rik | 0.691489362 | 0.48404255 | 0.87837838 | 0.6148649 |
| A_52_P1394 | 71.3     | Detected | 58      | Detected   | 28      | Detected   | 49.3    | Not Detect | Tmem221       | 0.6914446   | 0.39270687 | 0.85       | 0.4827586 |
| A_66_P1131 | 28.5     | Detected | 33.5    | Detected   | 31.1    | Detected   | 19.7    | Not Detect | Gsdmcl1       | 0.69122807  | 1.09122807 | 0.5880597  | 0.9283582 |
| A_55_P1997 | 4873.6   | Detected | 4074.5  | Detected   | 3988.2  | Detected   | 3368.3  | Detected   | Cwc22         | 0.691131812 | 0.81832731 | 0.82667812 | 0.9788195 |
| A_55_P2096 | 17.8     | Detected | 28.8    | Detected   | 11.7    | Not Detect | 12.3    | Not Detect | Loxl1         | 0.691011236 | 0.65730337 | 0.42708333 | 0.40625   |
| A_55_P1989 | 12166.5  | Detected | 9804.8  | Detected   | 9628.3  | Detected   | 8407.1  | Detected   | Smarge1       | 0.691003986 | 0.79137796 | 0.85744737 | 0.9819986 |
| A_55_P2119 | 1349.2   | Detected | 795.2   | Detected   | 1223.9  | Detected   | 932.2   | Detected   | 1110034G24Rik | 0.690927957 | 0.90713015 | 1.1722837  | 1.5391097 |
| A_55_P2002 | 26081.5  | Detected | 10540.9 | Detected   | 49765.7 | Detected   | 18018.4 | Detected   | Ephx1         | 0.690849836 | 1.90808427 | 1.70937965 | 4.7212003 |
| A_52_P7162 | 236.4    | Detected | 201.1   | Detected   | 170.3   | Detected   | 163.3   | Detected   | Olf1410       | 0.690778342 | 0.72038917 | 0.81203381 | 0.8468424 |
| A_55_P1974 | 3059.9   | Detected | 1428.4  | Detected   | 2000    | Detected   | 2113.6  | Detected   | Zbtb18        | 0.690741528 | 0.65361613 | 1.47969756 | 1.400168  |
| A_55_P2075 | 33.3     | Detected | 20.9    | Detected   | 30.5    | Detected   | 23      | Not Detect | Asphd1        | 0.690690691 | 0.91591592 | 1.10047847 | 1.4593301 |
| A_55_P1974 | 3451.5   | Detected | 2789.5  | Detected   | 3239.2  | Detected   | 2383.7  | Detected   | Sft2d1        | 0.690627264 | 0.93849051 | 0.8545259  | 1.1612117 |
| A_52_P3933 | 1324.4   | Detected | 908     | Detected   | 1257    | Detected   | 914.6   | Detected   | Snap23        | 0.690576865 | 0.94910903 | 1.00726872 | 1.3843612 |
| A_51_P2884 | 274.7    | Detected | 205.8   | Detected   | 286.7   | Detected   | 189.7   | Detected   | Slc25a29      | 0.690571533 | 1.04368402 | 0.92176871 | 1.3931001 |
| A_55_P2047 | 2308.1   | Detected | 2275.4  | Detected   | 2129.4  | Detected   | 1593.9  | Detected   | Uxs1          | 0.690568    | 0.92257701 | 0.70049222 | 0.9358355 |
| A_55_P2260 | 96.3     | Detected | 69.7    | Detected   | 27      | Detected   | 66.5    | Detected   | Ctps2         | 0.690550363 | 0.28037383 | 0.95408895 | 0.3873745 |
| A_55_P2077 | 5617.6   | Detected | 4068.3  | Detected   | 4292    | Detected   | 3879.1  | Detected   | Cenpk         | 0.690526203 | 0.76402734 | 0.95349409 | 1.0549861 |
| A_55_P1969 | 331.5    | Detected | 258.4   | Detected   | 285     | Detected   | 228.9   | Detected   | Atp9b         | 0.690497738 | 0.85972851 | 0.88583591 | 1.1029412 |
| A_55_P1995 | 58.8     | Detected | 31.4    | Detected   | 38.7    | Detected   | 40.6    | Not Detect | Nxf2          | 0.69047619  | 0.65816327 | 1.29299363 | 1.2324841 |
| A_51_P4885 | 857.4    | Detected | 1017    | Detected   | 522.6   | Detected   | 592     | Detected   | Appl1         | 0.690459529 | 0.60951714 | 0.58210423 | 0.5138643 |
| A_52_P4579 | 466.3    | Detected | 379.9   | Detected   | 564.8   | Detected   | 321.9   | Detected   | Trerf1        | 0.690328115 | 1.2112374  | 0.84732824 | 1.486707  |
| A_55_P1982 | 5905.2   | Detected | 3955.1  | Detected   | 5632.7  | Detected   | 4076.2  | Detected   | Rtfdc1        | 0.69027298  | 0.95385423 | 1.03061869 | 1.4241612 |
| A_55_P2115 | 35.5     | Detected | 26.9    | Detected   | 35.6    | Detected   | 24.5    | Not Detect | Pdhx          | 0.690140845 | 1.0028169  | 0.91078067 | 1.3234201 |
| A_55_P1989 | 123743.6 | Detected | 53764   | Detected   | 95059.5 | Detected   | 85393.4 | Detected   | Fam129b       | 0.690083366 | 0.7681973  | 1.58830072 | 1.7680883 |
| A_55_P2086 | 1909.9   | Detected | 823.2   | Detected   | 1725.8  | Detected   | 1317.8  | Detected   | Ube2h         | 0.689983769 | 0.90360752 | 1.60082604 | 2.0964529 |
| A_55_P1973 | 30.3     | Detected | 29.6    | Detected   | 22.5    | Detected   | 20.9    | Not Detect | AI507597      | 0.689768977 | 0.74257426 | 0.70608108 | 0.7601351 |
| A_55_P1977 | 17.4     | Detected | 12.8    | Not Detect | 5       | Not Detect | 12      | Not Detect | Ptprn2        | 0.689655172 | 0.28735632 | 0.9375     | 0.390625  |
| A_55_P1962 | 14.5     | Detected | 17.4    | Not Detect | 3.5     | Not Detect | 10      | Not Detect | Trem2         | 0.689655172 | 0.24137931 | 0.57471264 | 0.2011494 |
| A_55_P1967 | 53.8     | Detected | 37.7    | Detected   | 34.2    | Detected   | 37.1    | Not Detect | Kmt2d         | 0.689591078 | 0.63568773 | 0.98408488 | 0.9071618 |
| A_55_P2072 | 115      | Detected | 63.2    | Detected   | 104.1   | Detected   | 79.3    | Detected   | Vsig10        | 0.689565217 | 0.90521739 | 1.25474684 | 1.6471519 |
| A_55_P2356 | 230.6    | Detected | 168.6   | Detected   | 193.1   | Detected   | 159     | Detected   | 1600020E01Rik | 0.689505637 | 0.83738075 | 0.9430605  | 1.1453144 |
| A_55_P2179 | 1040.4   | Detected | 1050.6  | Detected   | 408     | Detected   | 717.3   | Detected   | Gem           | 0.689446367 | 0.39215686 | 0.68275271 | 0.3883495 |
| A_51_P4233 | 93.7     | Detected | 88.2    | Detected   | 100     | Detected   | 64.6    | Detected   | Katnal2       | 0.689434365 | 1.06723586 | 0.7324263  | 1.1337868 |
| A_52_P6013 | 10040.5  | Detected | 6478.1  | Detected   | 9025.9  | Detected   | 6922    | Detected   | Cd9912        | 0.689407898 | 0.89894926 | 1.06852318 | 1.3932943 |
| A_55_P2175 | 3674.8   | Detected | 1997.8  | Detected   | 1676    | Detected   | 2532.3  | Detected   | Cep250        | 0.689098726 | 0.45607924 | 1.2675443  | 0.8389228 |
| A_55_P2069 | 60538    | Detected | 46818.4 | Detected   | 59348.6 | Detected   | 41715.6 | Detected   | Ddx39b        | 0.689081238 | 0.98035284 | 0.89100866 | 1.2676341 |
| A_52_P4773 | 3285.1   | Detected | 2369.1  | Detected   | 2919.4  | Detected   | 2263.7  | Detected   | Csnk1d        | 0.689081002 | 0.88867919 | 0.95551053 | 1.2322823 |

|            |          |            |          |            |         |            |          |            |               |             |            |            |           |
|------------|----------|------------|----------|------------|---------|------------|----------|------------|---------------|-------------|------------|------------|-----------|
| A_65_P0897 | 5619.2   | Detected   | 7172.1   | Detected   | 2005    | Detected   | 3871.1   | Detected   | F3            | 0.688905894 | 0.35681236 | 0.53974429 | 0.2795555 |
| A_55_P2002 | 13.5     | Not Detect | 24.8     | Detected   | 3.3     | Not Detect | 9.3      | Not Detect | Smoc2         | 0.688888889 | 0.24444444 | 0.375      | 0.1330645 |
| A_52_P1518 | 27.3     | Detected   | 27.4     | Detected   | 21.8    | Detected   | 18.8     | Not Detect | Ttc26         | 0.688644689 | 0.7985348  | 0.68613139 | 0.7956204 |
| A_55_P2175 | 33.4     | Detected   | 36.1     | Detected   | 32.9    | Detected   | 23       | Not Detect | Ftx           | 0.688622754 | 0.98502994 | 0.63711911 | 0.9113573 |
| A_51_P3800 | 1253.3   | Detected   | 1017     | Detected   | 861.1   | Detected   | 863      | Detected   | Bcl2          | 0.688582143 | 0.68706615 | 0.84857424 | 0.846706  |
| A_55_P1953 | 10528.7  | Detected   | 9692.1   | Detected   | 8069    | Detected   | 7249.8   | Detected   | Rab12         | 0.688575038 | 0.76638141 | 0.74801127 | 0.8325337 |
| A_51_P1672 | 641.1    | Detected   | 421.5    | Detected   | 429.4   | Detected   | 441.4    | Detected   | Cask          | 0.688504134 | 0.6697863  | 1.04721234 | 1.0187426 |
| A_55_P2088 | 3487     | Detected   | 2988     | Detected   | 3935.8  | Detected   | 2400.8   | Detected   | Ctdsp2        | 0.688500143 | 1.12870662 | 0.80348059 | 1.3172021 |
| A_51_P2924 | 1259     | Detected   | 674.2    | Detected   | 796.8   | Detected   | 866.8    | Detected   | Ttbk2         | 0.688482923 | 0.63288324 | 1.28567191 | 1.1818451 |
| A_55_P2002 | 32.1     | Detected   | 29.2     | Detected   | 21.9    | Detected   | 22.1     | Not Detect | Gm10510       | 0.68847352  | 0.68224299 | 0.75684932 | 0.75      |
| A_55_P2000 | 222576.9 | Detected   | 180239.4 | Detected   | 187249  | Detected   | 153234.7 | Detected   | Cd63          | 0.688457338 | 0.84127778 | 0.85017316 | 1.0388905 |
| A_55_P2049 | 6988     | Detected   | 4042     | Detected   | 4836.7  | Detected   | 4810.6   | Detected   | Rab22a        | 0.688408701 | 0.69214367 | 1.19015339 | 1.1966106 |
| A_51_P1115 | 45794.9  | Detected   | 34801.3  | Detected   | 38006   | Detected   | 31523.8  | Detected   | Srp14         | 0.688369229 | 0.82991774 | 0.90582248 | 1.0920856 |
| A_55_P2003 | 607.7    | Detected   | 402.8    | Detected   | 586.7   | Detected   | 418.3    | Detected   | Unkl          | 0.688333059 | 0.96544348 | 1.03848064 | 1.4565541 |
| A_52_P9036 | 134.1    | Detected   | 112.7    | Detected   | 114.7   | Detected   | 92.3     | Detected   | Ifi2712a      | 0.688292319 | 0.85533184 | 0.81898846 | 1.0177462 |
| A_52_P5373 | 9572.7   | Detected   | 8204.4   | Detected   | 7233.7  | Detected   | 6587.7   | Detected   | Dimt1         | 0.68817575  | 0.75565932 | 0.8029472  | 0.8816854 |
| A_55_P2133 | 640.4    | Detected   | 357      | Detected   | 372.5   | Detected   | 440.7    | Detected   | Steap2        | 0.688163648 | 0.58166771 | 1.23445378 | 1.0434174 |
| A_55_P2043 | 66.7     | Detected   | 47.4     | Detected   | 63.6    | Detected   | 45.9     | Not Detect | Colq          | 0.688155922 | 0.95352324 | 0.96835443 | 1.3417722 |
| A_51_P3087 | 4817.5   | Detected   | 4357     | Detected   | 2690.1  | Detected   | 3315     | Detected   | Fosl1         | 0.688116243 | 0.55840166 | 0.76084462 | 0.6174202 |
| A_55_P2050 | 11242.6  | Detected   | 8683.1   | Detected   | 9505.4  | Detected   | 7735.8   | Detected   | Nfkbil1       | 0.68807927  | 0.84548058 | 0.89090302 | 1.0947012 |
| A_55_P2172 | 2316.6   | Detected   | 1808.8   | Detected   | 1290.4  | Detected   | 1594     | Detected   | Zxdb          | 0.688077355 | 0.55702322 | 0.88124724 | 0.7134011 |
| A_55_P2150 | 4516.5   | Detected   | 3547.4   | Detected   | 5454.6  | Detected   | 3107.5   | Detected   | Otub1         | 0.688032769 | 1.20770508 | 0.87599369 | 1.5376332 |
| A_51_P5112 | 8964.4   | Detected   | 9002.1   | Detected   | 4900.9  | Detected   | 6167.8   | Detected   | Fam46b        | 0.688032663 | 0.54670697 | 0.68515124 | 0.5444174 |
| A_55_P2313 | 556.4    | Detected   | 452.6    | Detected   | 460.4   | Detected   | 382.8    | Detected   | Zbed6         | 0.687994249 | 0.82746226 | 0.84577994 | 1.0172338 |
| A_55_P2172 | 233.6    | Detected   | 183.4    | Detected   | 124.6   | Detected   | 160.7    | Detected   | Mfn2          | 0.687928082 | 0.53339041 | 0.87622683 | 0.6793893 |
| A_55_P2057 | 91       | Detected   | 72.1     | Detected   | 136.8   | Detected   | 62.6     | Detected   | 9130011E15Rik | 0.687912088 | 1.5032967  | 0.86823856 | 1.8973648 |
| A_55_P1963 | 16947.4  | Detected   | 10122.7  | Detected   | 14505.4 | Detected   | 11655.7  | Detected   | Vps16         | 0.687757414 | 0.8559071  | 1.15144181 | 1.4329576 |
| A_66_P1157 | 4498.8   | Detected   | 3987.3   | Detected   | 2721.8  | Detected   | 3093.5   | Detected   | Mthfd2l       | 0.687627812 | 0.60500578 | 0.77583829 | 0.6826173 |
| A_55_P1953 | 43.2     | Detected   | 44.6     | Detected   | 34.7    | Detected   | 29.7     | Not Detect | Ttll7         | 0.6875      | 0.80324074 | 0.66591928 | 0.7780269 |
| A_55_P2074 | 3146     | Detected   | 2084.3   | Detected   | 1921    | Detected   | 2162.8   | Detected   | Dhx57         | 0.68747616  | 0.61061666 | 1.03766252 | 0.9216524 |
| A_55_P2087 | 3190.8   | Detected   | 2451.6   | Detected   | 4269    | Detected   | 2193.5   | Detected   | Abhd12        | 0.687445155 | 1.33790899 | 0.89472181 | 1.7413118 |
| A_55_P2130 | 1606     | Detected   | 1100.5   | Detected   | 1272.1  | Detected   | 1104     | Detected   | Nmt2          | 0.687422167 | 0.79209215 | 1.00318037 | 1.1559291 |
| A_66_P1379 | 2791.3   | Detected   | 2687.6   | Detected   | 2552.2  | Detected   | 1918.6   | Detected   | Tctn2         | 0.68734998  | 0.91434099 | 0.71387111 | 0.9496205 |
| A_52_P6500 | 16.3     | Detected   | 16.2     | Not Detect | 8.8     | Not Detect | 11.2     | Not Detect | Plxna4        | 0.687116564 | 0.5398773  | 0.69135802 | 0.5432099 |
| A_55_P2131 | 4120.4   | Detected   | 2545.2   | Detected   | 2996.5  | Detected   | 2830.6   | Detected   | Plk1s1        | 0.686972139 | 0.72723522 | 1.11213264 | 1.1773142 |
| A_52_P5572 | 26.5     | Detected   | 15.8     | Not Detect | 17.3    | Not Detect | 18.2     | Not Detect | Adamts10      | 0.686792453 | 0.65283019 | 1.15189873 | 1.0949367 |
| A_55_P2137 | 18641.5  | Detected   | 12086    | Detected   | 13049.1 | Detected   | 12795.5  | Detected   | Rtel1         | 0.686398627 | 0.70000268 | 1.05870429 | 1.0796872 |
| A_55_P1994 | 16.9     | Detected   | 11.4     | Not Detect | 19.3    | Detected   | 11.6     | Not Detect | Shank1        | 0.686390533 | 1.14201183 | 1.01754386 | 1.6929825 |
| A_55_P2319 | 8494.8   | Detected   | 6199.4   | Detected   | 5179.3  | Detected   | 5828.6   | Detected   | Plekha3       | 0.686137402 | 0.60970241 | 0.94018776 | 0.8354518 |
| A_55_P2111 | 970.3    | Detected   | 752.4    | Detected   | 808.8   | Detected   | 665.6    | Detected   | Hat1          | 0.68597341  | 0.83355663 | 0.88463583 | 1.0749601 |

|            |                   |                   |                   |                  |               |             |            |            |           |
|------------|-------------------|-------------------|-------------------|------------------|---------------|-------------|------------|------------|-----------|
| A_55_P1961 | 71.3 Detected     | 63.7 Detected     | 48.6 Detected     | 48.9 Not Detect  | Ctsk          | 0.685834502 | 0.68162693 | 0.76766091 | 0.7629513 |
| A_51_P4239 | 396.4 Detected    | 244.4 Detected    | 247.5 Detected    | 271.8 Detected   | Crem          | 0.685671039 | 0.62436932 | 1.11211129 | 1.0126841 |
| A_51_P4685 | 24907.4 Detected  | 20102.1 Detected  | 22157.5 Detected  | 17076.3 Detected | Smchd1        | 0.685591431 | 0.88959506 | 0.84947841 | 1.102248  |
| A_51_P4703 | 19.4 Detected     | 6.7 Not Detect    | 17.1 Not Detect   | 13.3 Not Detect  | Nkx1-2        | 0.68556701  | 0.8814433  | 1.98507463 | 2.5522388 |
| A_55_P2185 | 394.6 Detected    | 78.9 Detected     | 302.3 Detected    | 270.5 Detected   | Nnmt          | 0.685504308 | 0.76609225 | 3.42839037 | 3.8314322 |
| A_55_P1998 | 21.3 Detected     | 14 Not Detect     | 13.5 Not Detect   | 14.6 Not Detect  | Spef2         | 0.685446009 | 0.63380282 | 1.04285714 | 0.9642857 |
| A_55_P2380 | 57.2 Detected     | 74.7 Detected     | 27 Detected       | 39.2 Not Detect  | 4933433H22Rik | 0.685314685 | 0.47202797 | 0.52476573 | 0.3614458 |
| A_55_P2052 | 939 Detected      | 581.4 Detected    | 688.7 Detected    | 643.4 Detected   | Gm14393       | 0.685197018 | 0.73343983 | 1.10663915 | 1.1845545 |
| A_55_P2027 | 945.8 Detected    | 1065.5 Detected   | 136.1 Detected    | 647.9 Detected   | Rgs3          | 0.685028547 | 0.14389934 | 0.60807133 | 0.1277335 |
| A_55_P2138 | 267.2 Detected    | 217.8 Detected    | 130.1 Detected    | 183 Detected     | Psd3          | 0.68488024  | 0.4869012  | 0.84022039 | 0.597337  |
| A_52_P5640 | 46 Detected       | 35.5 Detected     | 45.9 Detected     | 31.5 Not Detect  | Etl4          | 0.684782609 | 0.99782609 | 0.88732394 | 1.2929577 |
| A_55_P2136 | 267.7 Detected    | 194.5 Detected    | 202.6 Detected    | 183.3 Detected   | Zfp120        | 0.684721703 | 0.75681733 | 0.94241645 | 1.0416452 |
| A_55_P2004 | 3599 Detected     | 2345.7 Detected   | 1732.4 Detected   | 2464.3 Detected  | Pitpnm2       | 0.684717977 | 0.48135593 | 1.0505606  | 0.7385429 |
| A_51_P4217 | 50.1 Detected     | 38.4 Detected     | 33.2 Detected     | 34.3 Not Detect  | Shroom4       | 0.684630739 | 0.66267465 | 0.89322917 | 0.8645833 |
| A_55_P2087 | 67430.6 Detected  | 53476.7 Detected  | 72523.1 Detected  | 46161.6 Detected | Ier3ip1       | 0.684579405 | 1.07552209 | 0.86320958 | 1.3561626 |
| A_55_P2005 | 16.8 Detected     | 20.9 Detected     | 20.9 Detected     | 11.5 Not Detect  | Acyp2         | 0.68452381  | 1.24404762 | 0.55023923 | 1         |
| A_51_P2418 | 48.8 Detected     | 39.2 Detected     | 12.6 Not Detect   | 33.4 Not Detect  | Tmem202       | 0.68442623  | 0.25819672 | 0.85204082 | 0.3214286 |
| A_52_P5215 | 4672.2 Detected   | 3627.4 Detected   | 2431.4 Detected   | 3194.3 Detected  | Trio          | 0.683682205 | 0.52039724 | 0.88060319 | 0.6702873 |
| A_51_P1290 | 62925 Detected    | 51431 Detected    | 45903.9 Detected  | 43020.5 Detected | B2m           | 0.683678983 | 0.72950179 | 0.83647022 | 0.8925337 |
| A_55_P2052 | 41.7 Detected     | 36.6 Detected     | 38 Detected       | 28.5 Not Detect  | Cdc23         | 0.683453237 | 0.91127098 | 0.77868852 | 1.0382514 |
| A_55_P2036 | 1796.3 Detected   | 1181.5 Detected   | 1211.5 Detected   | 1227.6 Detected  | Elp4          | 0.683404776 | 0.67444191 | 1.0390182  | 1.0253915 |
| A_52_P3664 | 42 Detected       | 35.7 Detected     | 48.9 Detected     | 28.7 Not Detect  | Pyy           | 0.683333333 | 1.16428571 | 0.80392157 | 1.3697479 |
| A_52_P1578 | 18624.4 Detected  | 17975.3 Detected  | 15920.4 Detected  | 12725.6 Detected | LOC101056611  | 0.683275703 | 0.85481411 | 0.70794924 | 0.885682  |
| A_51_P4949 | 105.7 Detected    | 141.5 Detected    | 45.7 Detected     | 72.2 Detected    | Runx3         | 0.683065279 | 0.43235572 | 0.51024735 | 0.3229682 |
| A_55_P2178 | 1515.5 Detected   | 378.9 Detected    | 1666.2 Detected   | 1035.1 Detected  | Ugt1a10       | 0.683008908 | 1.09943913 | 2.73185537 | 4.3974663 |
| A_51_P4762 | 976 Detected      | 638.1 Detected    | 839.8 Detected    | 666.6 Detected   | Zfp120        | 0.682991803 | 0.86045082 | 1.04466385 | 1.3160947 |
| A_55_P2140 | 118904 Detected   | 53207.2 Detected  | 99014.5 Detected  | 81194.6 Detected | Fam129b       | 0.68285844  | 0.8327264  | 1.52600776 | 1.860923  |
| A_55_P2032 | 571.8 Detected    | 448.6 Detected    | 435.4 Detected    | 390.3 Detected   | Zfp715        | 0.682581322 | 0.76145505 | 0.87004012 | 0.9705751 |
| A_55_P2058 | 7181.7 Detected   | 3119.1 Detected   | 13692.8 Detected  | 4902 Detected    | Aldh3b1       | 0.682568194 | 1.90662378 | 1.57160719 | 4.3899843 |
| A_55_P1979 | 71707.7 Detected  | 59302 Detected    | 56779.9 Detected  | 48945 Detected   | Eif3m         | 0.682562682 | 0.79182431 | 0.82535159 | 0.9574702 |
| A_51_P3354 | 6619.4 Detected   | 5773.4 Detected   | 6975.1 Detected   | 4517.7 Detected  | 1810055G02Rik | 0.682493882 | 1.05373599 | 0.78250251 | 1.2081442 |
| A_55_P2079 | 221279.2 Detected | 171637.5 Detected | 218971.1 Detected | 151021 Detected  | Gm5963        | 0.682490718 | 0.98956929 | 0.87988348 | 1.2757766 |
| A_51_P5130 | 1008.1 Detected   | 535.3 Detected    | 1005.8 Detected   | 688 Detected     | B630019K06Rik | 0.682471977 | 0.99771848 | 1.2852606  | 1.8789464 |
| A_55_P2113 | 74.6 Detected     | 58.8 Detected     | 50.6 Detected     | 50.9 Not Detect  | Tmem87a       | 0.68230563  | 0.67828418 | 0.86564626 | 0.8605442 |
| A_51_P1579 | 475.1 Detected    | 446.8 Detected    | 56.8 Detected     | 324.1 Detected   | Fam115a       | 0.682172174 | 0.11955378 | 0.72538048 | 0.1271262 |
| A_55_P2158 | 12.9 Not Detect   | 140.6 Detected    | 3.2 Not Detect    | 8.8 Not Detect   | Angpt1        | 0.682170543 | 0.24806202 | 0.0625889  | 0.0227596 |
| A_52_P1094 | 10115.8 Detected  | 10245.3 Detected  | 8753.6 Detected   | 6900.2 Detected  | Cebpz         | 0.682121038 | 0.86533937 | 0.67349907 | 0.8544015 |
| A_55_P2146 | 15.1 Not Detect   | 20.7 Detected     | 16.7 Not Detect   | 10.3 Not Detect  | Olfir247      | 0.682119205 | 1.10596026 | 0.49758454 | 0.8067633 |
| A_52_P4870 | 1969.3 Detected   | 1683.2 Detected   | 1233.2 Detected   | 1343.2 Detected  | Smg7          | 0.682069771 | 0.62621236 | 0.7980038  | 0.7326521 |
| A_55_P2119 | 36.8 Detected     | 37.8 Detected     | 25.7 Detected     | 25.1 Not Detect  | 1110025L11Rik | 0.682065217 | 0.69836957 | 0.66402116 | 0.6798942 |

|            |          |            |          |            |         |            |         |            |               |             |            |            |           |
|------------|----------|------------|----------|------------|---------|------------|---------|------------|---------------|-------------|------------|------------|-----------|
| A_51_P1314 | 129069.5 | Detected   | 144797.8 | Detected   | 97075.1 | Detected   | 88026.1 | Detected   | Tnfrsf12a     | 0.682005431 | 0.75211495 | 0.60792429 | 0.6704183 |
| A_55_P2072 | 10767    | Detected   | 6483.8   | Detected   | 7118.5  | Detected   | 7342.7  | Detected   | Ncoa6         | 0.681963407 | 0.66114052 | 1.13246861 | 1.0978901 |
| A_55_P2089 | 39.6     | Detected   | 31.6     | Detected   | 33.6    | Detected   | 27      | Not Detect | Shank3        | 0.681818182 | 0.84848485 | 0.85443038 | 1.0632911 |
| A_55_P1989 | 36103    | Detected   | 11624.4  | Detected   | 26646.5 | Detected   | 24613.2 | Detected   | Sqrdl         | 0.681749439 | 0.73806886 | 2.1173738  | 2.2922904 |
| A_55_P2123 | 91871.4  | Detected   | 68702.1  | Detected   | 72428.7 | Detected   | 62626.7 | Detected   | Rbbp7         | 0.681677867 | 0.78837048 | 0.91156893 | 1.0542429 |
| A_55_P2037 | 1252.4   | Detected   | 745.7    | Detected   | 926.2   | Detected   | 853.5   | Detected   | Agap1         | 0.681491536 | 0.73954008 | 1.14456216 | 1.2420544 |
| A_66_P1005 | 24984.5  | Detected   | 20881.3  | Detected   | 23669.1 | Detected   | 17021.7 | Detected   | Bnip2         | 0.6812904   | 0.94735136 | 0.81516476 | 1.133507  |
| A_51_P1829 | 325.9    | Detected   | 286.8    | Detected   | 366.1   | Detected   | 222     | Detected   | Map3k2        | 0.681190549 | 1.12335072 | 0.77405858 | 1.2764993 |
| A_52_P3059 | 227.4    | Detected   | 102.7    | Detected   | 177.2   | Detected   | 154.9   | Detected   | Mlit4         | 0.68117854  | 0.77924362 | 1.50827653 | 1.7254138 |
| A_55_P2183 | 9074.9   | Detected   | 8389.1   | Detected   | 6901    | Detected   | 6179.8  | Detected   | Rdx           | 0.680977201 | 0.76044915 | 0.73664636 | 0.8226151 |
| A_55_P2064 | 10778.6  | Detected   | 7025.8   | Detected   | 9091.8  | Detected   | 7339.9  | Detected   | Furin         | 0.680969699 | 0.84350472 | 1.04470665 | 1.294059  |
| A_55_P2068 | 216.2    | Detected   | 144.4    | Detected   | 172.4   | Detected   | 147.2   | Detected   | Farp2         | 0.680851064 | 0.79740981 | 1.01939058 | 1.1939058 |
| A_66_P1007 | 8082.3   | Detected   | 5593.7   | Detected   | 7122.4  | Detected   | 5502.8  | Detected   | Katnbl1       | 0.680845799 | 0.8812343  | 0.98374958 | 1.2732896 |
| A_55_P1986 | 595      | Detected   | 533      | Detected   | 484.8   | Detected   | 405.1   | Detected   | Suco          | 0.680840336 | 0.81478992 | 0.76003752 | 0.9095685 |
| A_51_P2548 | 6776     | Detected   | 4192.8   | Detected   | 4159.7  | Detected   | 4612.4  | Detected   | Kif4          | 0.680696576 | 0.61388725 | 1.10007632 | 0.9921055 |
| A_52_P5107 | 4539.5   | Detected   | 4304     | Detected   | 4755.5  | Detected   | 3087.4  | Detected   | Tbl3          | 0.680118956 | 1.04758233 | 0.71733271 | 1.1049024 |
| A_55_P1968 | 15       | Not Detect | 33.7     | Detected   | 6.7     | Not Detect | 10.2    | Not Detect | Anks1b        | 0.68        | 0.44666667 | 0.30267062 | 0.1988131 |
| A_51_P1633 | 33209.3  | Detected   | 28463.1  | Detected   | 31433.4 | Detected   | 22573.1 | Detected   | Zwint         | 0.679722246 | 0.94652402 | 0.79306541 | 1.1043562 |
| A_52_P1614 | 3803.5   | Detected   | 4053.4   | Detected   | 3700.7  | Detected   | 2585.1  | Detected   | Bcl6          | 0.679663468 | 0.97297226 | 0.63776089 | 0.9129866 |
| A_55_P2179 | 1072.7   | Detected   | 937.3    | Detected   | 683.4   | Detected   | 728.8   | Detected   | Ppig          | 0.679407104 | 0.63708399 | 0.77755254 | 0.7291155 |
| A_55_P2003 | 232      | Detected   | 340.9    | Detected   | 181.5   | Detected   | 157.6   | Detected   | Zscan4e       | 0.679310345 | 0.78232759 | 0.46230566 | 0.5324142 |
| A_55_P2158 | 42.4     | Detected   | 38.1     | Detected   | 30.7    | Detected   | 28.8    | Not Detect | Gm14243       | 0.679245283 | 0.7240566  | 0.75590551 | 0.8057743 |
| A_55_P1982 | 4048.5   | Detected   | 2556.7   | Detected   | 3312.3  | Detected   | 2749.9  | Detected   | C78339        | 0.679239224 | 0.81815487 | 1.07556616 | 1.2955372 |
| A_55_P2087 | 349.4    | Detected   | 286.4    | Detected   | 293     | Detected   | 237.3   | Detected   | Patz1         | 0.679164282 | 0.83858042 | 0.82856145 | 1.0230447 |
| A_52_P6860 | 1634.3   | Detected   | 921.9    | Detected   | 893.5   | Detected   | 1109.8  | Detected   | Phf2          | 0.679067491 | 0.54671725 | 1.2038182  | 0.9691941 |
| A_55_P2113 | 27964.7  | Detected   | 19089.4  | Detected   | 16237.9 | Detected   | 18988.6 | Detected   | Tmem132a      | 0.679020336 | 0.58065704 | 0.99471958 | 0.8506239 |
| A_55_P2167 | 16.2     | Detected   | 6.4      | Not Detect | 5.8     | Not Detect | 11      | Not Detect | Dmd           | 0.679012346 | 0.35802469 | 1.71875    | 0.90625   |
| A_55_P2066 | 16.2     | Detected   | 15.2     | Not Detect | 12.8    | Not Detect | 11      | Not Detect | AB124611      | 0.679012346 | 0.79012346 | 0.72368421 | 0.8421053 |
| A_51_P2928 | 10911.1  | Detected   | 7022.3   | Detected   | 9285.8  | Detected   | 7408.7  | Detected   | Snrnp200      | 0.679005783 | 0.8510416  | 1.05502471 | 1.3223303 |
| A_55_P2050 | 127.4    | Detected   | 79       | Detected   | 149.4   | Detected   | 86.5    | Detected   | Serinc4       | 0.678963893 | 1.17268446 | 1.09493671 | 1.8911392 |
| A_66_P1389 | 1758.2   | Detected   | 1090.9   | Detected   | 1608.3  | Detected   | 1193.6  | Detected   | Lpin2         | 0.678876123 | 0.91474235 | 1.09414245 | 1.4742873 |
| A_55_P2166 | 418.9    | Detected   | 355.3    | Detected   | 368.8   | Detected   | 284.3   | Detected   | Cd44          | 0.678682263 | 0.88040105 | 0.80016887 | 1.0379961 |
| A_51_P2194 | 504.1    | Detected   | 239.3    | Detected   | 405     | Detected   | 342.1   | Detected   | Tsku          | 0.678635191 | 0.80341202 | 1.42958629 | 1.6924363 |
| A_52_P5286 | 5329.9   | Detected   | 5942.8   | Detected   | 5239.5  | Detected   | 3616.9  | Detected   | Ttc27         | 0.678605602 | 0.98303908 | 0.60861883 | 0.8816551 |
| A_66_P1134 | 115.7    | Detected   | 91.5     | Detected   | 94.8    | Detected   | 78.5    | Detected   | 9130011E15Rik | 0.678478825 | 0.81936041 | 0.8579235  | 1.0360656 |
| A_55_P1953 | 53.8     | Detected   | 221.3    | Detected   | 31.8    | Detected   | 36.5    | Not Detect | Foxn1         | 0.678438662 | 0.59107807 | 0.16493448 | 0.1436963 |
| A_55_P2140 | 19.9     | Detected   | 18.9     | Detected   | 16.8    | Not Detect | 13.5    | Not Detect | Creg2         | 0.67839196  | 0.84422111 | 0.71428571 | 0.8888889 |
| A_51_P2961 | 8436     | Detected   | 5450.3   | Detected   | 8190.4  | Detected   | 5722.2  | Detected   | Rhot2         | 0.678307255 | 0.97088668 | 1.04988716 | 1.502743  |
| A_51_P2622 | 82       | Detected   | 134.2    | Detected   | 83      | Detected   | 55.6    | Detected   | Itgb2         | 0.67804878  | 1.01219512 | 0.414307   | 0.6184799 |
| A_55_P1985 | 47.8     | Detected   | 37.5     | Detected   | 24.9    | Detected   | 32.4    | Not Detect | Gm10375       | 0.677824268 | 0.5209205  | 0.864      | 0.664     |

|            |                  |                  |                  |                  |               |             |            |            |           |
|------------|------------------|------------------|------------------|------------------|---------------|-------------|------------|------------|-----------|
| A_55_P2360 | 958.4 Detected   | 809.6 Detected   | 603.1 Detected   | 649.6 Detected   | BC005561      | 0.677796327 | 0.62927796 | 0.80237154 | 0.7449358 |
| A_52_P6975 | 4613.1 Detected  | 3772.9 Detected  | 4422.9 Detected  | 3125.9 Detected  | Mterfd2       | 0.677613752 | 0.95876959 | 0.82851388 | 1.1722813 |
| A_55_P2038 | 1240.4 Detected  | 689.3 Detected   | 1054.8 Detected  | 840.5 Detected   | C3            | 0.677603999 | 0.85037085 | 1.21935297 | 1.5302481 |
| A_66_P1293 | 255.5 Detected   | 210 Detected     | 197.3 Detected   | 173.1 Detected   | Gm7644        | 0.677495108 | 0.77221135 | 0.82428571 | 0.9395238 |
| A_55_P2070 | 2067.5 Detected  | 1723.1 Detected  | 1562.8 Detected  | 1400.6 Detected  | 5830416P10Rik | 0.677436518 | 0.75588875 | 0.81283733 | 0.90697   |
| A_55_P2110 | 12.4 Not Detect  | 26.3 Detected    | 13.9 Not Detect  | 8.4 Not Detect   | Slc37a2       | 0.677419355 | 1.12096774 | 0.31939163 | 0.5285171 |
| A_55_P2118 | 1459.9 Detected  | 739.5 Detected   | 1264.1 Detected  | 988.9 Detected   | Tnks2         | 0.677375163 | 0.86588122 | 1.3372549  | 1.7093982 |
| A_52_P3442 | 29880.9 Detected | 27305.3 Detected | 17406.8 Detected | 20240.3 Detected | F2r           | 0.677365809 | 0.58253935 | 0.74125902 | 0.637488  |
| A_55_P1992 | 18.9 Detected    | 10 Not Detect    | 6.7 Not Detect   | 12.8 Not Detect  | Gm11567       | 0.677248677 | 0.35449735 | 1.28       | 0.67      |
| A_51_P4987 | 19.5 Detected    | 29.5 Detected    | 22.8 Detected    | 13.2 Not Detect  | 1700019D03Rik | 0.676923077 | 1.16923077 | 0.44745763 | 0.7728814 |
| A_51_P3925 | 14143.8 Detected | 12741.8 Detected | 10285.4 Detected | 9573.9 Detected  | Haus3         | 0.676897298 | 0.72720202 | 0.75137736 | 0.8072172 |
| A_55_P2185 | 16.4 Detected    | 9.2 Not Detect   | 19.1 Detected    | 11.1 Not Detect  | Tmsb15a       | 0.676829268 | 1.16463415 | 1.20652174 | 2.076087  |
| A_55_P2115 | 2886.7 Detected  | 2081.9 Detected  | 1689 Detected    | 1953.8 Detected  | Tmem63b       | 0.676828212 | 0.58509717 | 0.93846967 | 0.8112782 |
| A_55_P2085 | 5447.2 Detected  | 4703.4 Detected  | 1429.3 Detected  | 3684.7 Detected  | Nfix          | 0.676439272 | 0.26239169 | 0.783412   | 0.3038866 |
| A_55_P1995 | 3704.1 Detected  | 2546.4 Detected  | 2793.3 Detected  | 2505.3 Detected  | Gm14431       | 0.67635863  | 0.75411031 | 0.98385957 | 1.0969604 |
| A_55_P2102 | 224.6 Detected   | 97.8 Detected    | 103.3 Detected   | 151.9 Detected   | Inca1         | 0.676313446 | 0.45992876 | 1.55316973 | 1.0562372 |
| A_51_P1231 | 3373.7 Detected  | 2317.3 Detected  | 2469.1 Detected  | 2281.3 Detected  | Ercc6l        | 0.676201203 | 0.73186709 | 0.98446468 | 1.0655073 |
| A_55_P2140 | 1237.8 Detected  | 715.4 Detected   | 1404.6 Detected  | 837 Detected     | B3galt4       | 0.676199709 | 1.13475521 | 1.16997484 | 1.9633771 |
| A_55_P2094 | 451.4 Detected   | 914.5 Detected   | 1094.7 Detected  | 305.2 Detected   | Nrg2          | 0.676118742 | 2.42512184 | 0.33373428 | 1.1970476 |
| A_55_P1967 | 40.7 Detected    | 25.4 Detected    | 40.2 Detected    | 27.5 Not Detect  | Zfp85         | 0.675675676 | 0.98771499 | 1.08267717 | 1.5826772 |
| A_51_P4573 | 233.1 Detected   | 284.6 Detected   | 134.2 Detected   | 157.5 Detected   | Med13l        | 0.675675676 | 0.57571858 | 0.55340829 | 0.471539  |
| A_55_P2049 | 72.1 Detected    | 59 Detected      | 72.8 Detected    | 48.7 Detected    | Pamr1         | 0.675450763 | 1.00970874 | 0.82542373 | 1.2338983 |
| A_51_P4131 | 53.3 Detected    | 49.1 Detected    | 40.4 Detected    | 36 Not Detect    | Klk1b3        | 0.675422139 | 0.75797373 | 0.73319756 | 0.8228106 |
| A_55_P2113 | 19.1 Detected    | 15 Not Detect    | 17.7 Detected    | 12.9 Not Detect  | Zcwpw2        | 0.67539267  | 0.92670157 | 0.86       | 1.18      |
| A_51_P4245 | 6758.5 Detected  | 8201.1 Detected  | 10561.3 Detected | 4564.2 Detected  | Vnn1          | 0.675327366 | 1.56266923 | 0.5565351  | 1.2877907 |
| A_55_P2085 | 2772.8 Detected  | 1600.4 Detected  | 2355.5 Detected  | 1872.2 Detected  | Ppp2r5d       | 0.675201962 | 0.84950231 | 1.16983254 | 1.4718195 |
| A_55_P2194 | 27.4 Detected    | 30.2 Detected    | 29.5 Detected    | 18.5 Not Detect  | A230056J06Rik | 0.675182482 | 1.07664234 | 0.61258278 | 0.9768212 |
| A_55_P2331 | 51.4 Detected    | 61.1 Detected    | 35.1 Detected    | 34.7 Not Detect  | C230071I02Rik | 0.675097276 | 0.68287938 | 0.56792144 | 0.5744681 |
| A_55_P2014 | 10691 Detected   | 8026 Detected    | 11214.9 Detected | 7217 Detected    | Knop1         | 0.675053784 | 1.04900384 | 0.89920259 | 1.3973212 |
| A_55_P1996 | 11184.8 Detected | 6282.1 Detected  | 12530.9 Detected | 7550 Detected    | Ppdf          | 0.675023246 | 1.12035083 | 1.20182741 | 1.9946992 |
| A_55_P1971 | 486.1 Detected   | 391.6 Detected   | 424.4 Detected   | 328.1 Detected   | Slc25a36      | 0.674963999 | 0.87307138 | 0.83784474 | 1.0837589 |
| A_55_P1960 | 801.9 Detected   | 561.2 Detected   | 504.8 Detected   | 541.2 Detected   | Ube2w         | 0.674897119 | 0.62950493 | 0.96436208 | 0.8995011 |
| A_55_P2077 | 6905.6 Detected  | 3884.8 Detected  | 8235.6 Detected  | 4659.8 Detected  | Porcn         | 0.674785681 | 1.19259731 | 1.19949547 | 2.1199547 |
| A_52_P1814 | 3671.8 Detected  | 2857 Detected    | 2740.2 Detected  | 2477.2 Detected  | Setd8         | 0.674655482 | 0.74628248 | 0.86706335 | 0.959118  |
| A_55_P2115 | 16.9 Detected    | 10 Not Detect    | 7.3 Not Detect   | 11.4 Not Detect  | Olf1247       | 0.674556213 | 0.43195266 | 1.14       | 0.73      |
| A_52_P9490 | 315.2 Detected   | 193 Detected     | 219.7 Detected   | 212.6 Detected   | Zfp160        | 0.674492386 | 0.69701777 | 1.1015544  | 1.138342  |
| A_55_P2391 | 482.3 Detected   | 171.7 Detected   | 234.8 Detected   | 325.3 Detected   | 4931407E12Rik | 0.674476467 | 0.48683392 | 1.89458358 | 1.3675015 |
| A_51_P4275 | 307.8 Detected   | 502.5 Detected   | 78.2 Detected    | 207.6 Detected   | Thsd1         | 0.674463938 | 0.25406108 | 0.41313433 | 0.1556219 |
| A_65_P0852 | 5848.3 Detected  | 4405.4 Detected  | 4598 Detected    | 3943.4 Detected  | Ssrp1         | 0.674281415 | 0.78621138 | 0.89512871 | 1.0437191 |
| A_55_P2079 | 17.8 Detected    | 13.1 Not Detect  | 16.5 Not Detect  | 12 Not Detect    | Fuca1         | 0.674157303 | 0.92696629 | 0.91603053 | 1.259542  |

|            |                   |                   |                  |                  |               |             |            |            |           |
|------------|-------------------|-------------------|------------------|------------------|---------------|-------------|------------|------------|-----------|
| A_51_P2333 | 629.4 Detected    | 461.6 Detected    | 546.7 Detected   | 424.3 Detected   | Zfp944        | 0.674134096 | 0.86860502 | 0.91919411 | 1.1843588 |
| A_51_P1931 | 3521.2 Detected   | 2198.7 Detected   | 2738.2 Detected  | 2373.3 Detected  | Slc25a25      | 0.674003181 | 0.77763263 | 1.07941056 | 1.2453723 |
| A_55_P2412 | 1304 Detected     | 1172.4 Detected   | 1009.4 Detected  | 878.7 Detected   | Ubxn7         | 0.673849693 | 0.77407975 | 0.74948823 | 0.860969  |
| A_55_P2009 | 177.5 Detected    | 143.8 Detected    | 166.9 Detected   | 119.6 Detected   | Tsc2          | 0.673802817 | 0.94028169 | 0.83171071 | 1.1606398 |
| A_52_P1511 | 154.2 Detected    | 107.7 Detected    | 66.3 Detected    | 103.9 Detected   | Kcnab3        | 0.673800259 | 0.42996109 | 0.96471681 | 0.6155989 |
| A_55_P2016 | 29631.5 Detected  | 29264.6 Detected  | 16564.2 Detected | 19963.8 Detected | Errfi1        | 0.67373572  | 0.55900646 | 0.68218257 | 0.5660149 |
| A_55_P2075 | 298.2 Detected    | 323 Detected      | 228.6 Detected   | 200.9 Detected   | Bcl9          | 0.67370892  | 0.7665996  | 0.62198142 | 0.7077399 |
| A_55_P1992 | 10370.2 Detected  | 7183.9 Detected   | 6856.7 Detected  | 6985.7 Detected  | Hdac6         | 0.673632138 | 0.66119265 | 0.97241053 | 0.9544537 |
| A_52_P4356 | 17180.8 Detected  | 11115.5 Detected  | 13461.2 Detected | 11571.7 Detected | Npepl1        | 0.673525098 | 0.78350251 | 1.04104179 | 1.2110296 |
| A_52_P2255 | 117.9 Detected    | 82.2 Detected     | 52.8 Detected    | 79.4 Detected    | Abhd15        | 0.673452078 | 0.44783715 | 0.96593674 | 0.6423358 |
| A_55_P2070 | 211.6 Detected    | 124.1 Detected    | 166.4 Detected   | 142.5 Detected   | Ccdc155       | 0.673440454 | 0.78638941 | 1.14826753 | 1.3408541 |
| A_51_P3580 | 44.4 Detected     | 31.8 Detected     | 33.5 Detected    | 29.9 Not Detect  | Mkl2          | 0.673423423 | 0.7545045  | 0.94025157 | 1.0534591 |
| A_51_P1339 | 15.3 Detected     | 14.2 Not Detect   | 13.5 Not Detect  | 10.3 Not Detect  | Olfir1043     | 0.673202614 | 0.88235294 | 0.72535211 | 0.9507042 |
| A_51_P3803 | 4210.4 Detected   | 6232.2 Detected   | 1913.4 Detected  | 2834.1 Detected  | Ncam1         | 0.673118944 | 0.45444613 | 0.45475113 | 0.3070184 |
| A_51_P4304 | 8939.4 Detected   | 7439 Detected     | 5910.6 Detected  | 6017.1 Detected  | Ada           | 0.673098866 | 0.66118531 | 0.80885872 | 0.7945423 |
| A_55_P2105 | 108873.7 Detected | 104385.3 Detected | 94185.1 Detected | 73275.9 Detected | Nop56         | 0.67303582  | 0.86508587 | 0.70197528 | 0.9022832 |
| A_55_P2060 | 26.3 Detected     | 22.9 Detected     | 22.4 Detected    | 17.7 Not Detect  | Col15a1       | 0.673003802 | 0.85171103 | 0.77292576 | 0.9781659 |
| A_55_P2144 | 1259 Detected     | 1643.9 Detected   | 1467.9 Detected  | 847.2 Detected   | Suv420h1      | 0.672915012 | 1.16592534 | 0.51535982 | 0.8929375 |
| A_55_P2061 | 181.5 Detected    | 140 Detected      | 40.1 Detected    | 122.1 Detected   | Tmsb4x        | 0.672727273 | 0.22093664 | 0.87214286 | 0.2864286 |
| A_55_P2118 | 16.5 Detected     | 18.9 Not Detect   | 21.5 Detected    | 11.1 Not Detect  | H60c          | 0.672727273 | 1.3030303  | 0.58730159 | 1.1375661 |
| A_52_P2158 | 738.1 Detected    | 603.3 Detected    | 445.1 Detected   | 496.5 Detected   | Alg13         | 0.67267308  | 0.60303482 | 0.82297364 | 0.7377756 |
| A_55_P2052 | 93300.2 Detected  | 43029.6 Detected  | 75712.9 Detected | 62758.9 Detected | Id1           | 0.672655578 | 0.81149772 | 1.45850531 | 1.7595539 |
| A_55_P2170 | 34.2 Detected     | 29.2 Detected     | 34 Detected      | 23 Not Detect    | Fbxo27        | 0.67251462  | 0.99415205 | 0.78767123 | 1.1643836 |
| A_55_P1965 | 539.2 Detected    | 413.1 Detected    | 585 Detected     | 362.6 Detected   | Smyd3         | 0.672477745 | 1.08494065 | 0.87775357 | 1.416122  |
| A_55_P1974 | 35554.1 Detected  | 32224.3 Detected  | 28352.1 Detected | 23908.8 Detected | Eif4b         | 0.672462529 | 0.79743546 | 0.7419494  | 0.879836  |
| A_51_P4944 | 101 Detected      | 84.1 Detected     | 59 Detected      | 67.9 Detected    | Tmem201       | 0.672277228 | 0.58415842 | 0.80737218 | 0.7015458 |
| A_55_P2141 | 194.6 Detected    | 174.1 Detected    | 83.3 Detected    | 130.8 Detected   | Mb21d1        | 0.672147996 | 0.42805755 | 0.75129236 | 0.4784607 |
| A_55_P2419 | 12.2 Not Detect   | 20.9 Detected     | 8.6 Not Detect   | 8.2 Not Detect   | 2810449G22Rik | 0.672131148 | 0.70491803 | 0.3923445  | 0.4114833 |
| A_55_P2128 | 948.5 Detected    | 1065 Detected     | 131.4 Detected   | 637.4 Detected   | Ccdc80        | 0.672008434 | 0.13853453 | 0.59849765 | 0.1233803 |
| A_55_P2118 | 19.2 Detected     | 14.1 Not Detect   | 22.4 Detected    | 12.9 Not Detect  | 1700014B07Rik | 0.671875    | 1.16666667 | 0.91489362 | 1.5886525 |
| A_51_P2571 | 7597.5 Detected   | 4748.6 Detected   | 6893.9 Detected  | 5103.7 Detected  | Ddrgrk1       | 0.671760448 | 0.90739059 | 1.07477994 | 1.4517753 |
| A_55_P2080 | 112.4 Detected    | 67.6 Detected     | 84 Detected      | 75.5 Detected    | Zbtb21        | 0.671708185 | 0.74733096 | 1.11686391 | 1.2426036 |
| A_55_P2046 | 1866.6 Detected   | 1485.6 Detected   | 1455.8 Detected  | 1253.8 Detected  | Dcun1d4       | 0.671702561 | 0.77992071 | 0.84396877 | 0.9799408 |
| A_55_P2032 | 103.5 Detected    | 472.2 Detected    | 5.2 Not Detect   | 69.5 Detected    | Wnt9a         | 0.671497585 | 0.05024155 | 0.1471834  | 0.0110123 |
| A_51_P2837 | 22245.4 Detected  | 17865.5 Detected  | 19519.6 Detected | 14934.1 Detected | Msh2          | 0.671334298 | 0.8774668  | 0.83591839 | 1.0925863 |
| A_52_P6164 | 358.1 Detected    | 295.5 Detected    | 256.1 Detected   | 240.4 Detected   | Bard1         | 0.67132086  | 0.71516336 | 0.81353638 | 0.8666667 |
| A_55_P2340 | 28.9 Detected     | 45.3 Detected     | 20.3 Detected    | 19.4 Not Detect  | B230110G15Rik | 0.671280277 | 0.70242215 | 0.42825607 | 0.4481236 |
| A_51_P1397 | 14.6 Not Detect   | 366.9 Detected    | 3.5 Not Detect   | 9.8 Not Detect   | Fam26e        | 0.671232877 | 0.23972603 | 0.02671028 | 0.0095394 |
| A_52_P5905 | 112312.5 Detected | 125998.3 Detected | 77504.4 Detected | 75386.8 Detected | Fbln2         | 0.671223595 | 0.69007813 | 0.59831601 | 0.6151226 |
| A_55_P2051 | 45 Detected       | 26.1 Detected     | 34.4 Detected    | 30.2 Not Detect  | Zfp874b       | 0.671111111 | 0.76444444 | 1.15708812 | 1.3180077 |

|            |                   |                   |                   |                  |               |             |            |            |           |
|------------|-------------------|-------------------|-------------------|------------------|---------------|-------------|------------|------------|-----------|
| A_51_P2583 | 15.2 Detected     | 9.9 Not Detect    | 8 Not Detect      | 10.2 Not Detect  | Igsf6         | 0.671052632 | 0.52631579 | 1.03030303 | 0.8080808 |
| A_55_P1982 | 6787.1 Detected   | 5725.7 Detected   | 5169.4 Detected   | 4554.2 Detected  | Blcap         | 0.671008236 | 0.76165078 | 0.7953962  | 0.9028416 |
| A_52_P1147 | 597.4 Detected    | 693.7 Detected    | 1058.2 Detected   | 400.8 Detected   | Ptpn6         | 0.670907265 | 1.77134248 | 0.57777137 | 1.5254433 |
| A_52_P6055 | 57.1 Detected     | 36.1 Detected     | 59.7 Detected     | 38.3 Not Detect  | Mmp24         | 0.670753065 | 1.04553415 | 1.06094183 | 1.6537396 |
| A_55_P2034 | 17.3 Detected     | 16.7 Detected     | 3.5 Not Detect    | 11.6 Not Detect  | 1700013F07Rik | 0.670520231 | 0.20231214 | 0.69461078 | 0.2095808 |
| A_52_P2484 | 1170.7 Detected   | 1061.7 Detected   | 926.4 Detected    | 784.4 Detected   | Zfx           | 0.67002648  | 0.79132143 | 0.73881511 | 0.8725629 |
| A_55_P2051 | 171.5 Detected    | 106.2 Detected    | 165.4 Detected    | 114.9 Detected   | Rfx3          | 0.669970845 | 0.96443149 | 1.0819209  | 1.5574388 |
| A_51_P2354 | 940 Detected      | 803 Detected      | 902.6 Detected    | 629.7 Detected   | Pelp1         | 0.669893617 | 0.96021277 | 0.78418431 | 1.1240349 |
| A_66_P1168 | 6806.3 Detected   | 5483.1 Detected   | 5639.4 Detected   | 4559.2 Detected  | Smchd1        | 0.669849992 | 0.8285559  | 0.83150043 | 1.0285058 |
| A_55_P2194 | 31.8 Detected     | 25.3 Detected     | 6.2 Not Detect    | 21.3 Not Detect  | E130106K03Rik | 0.669811321 | 0.19496855 | 0.84189723 | 0.2450593 |
| A_52_P3492 | 799.8 Detected    | 594.5 Detected    | 736 Detected      | 535.7 Detected   | Rprd1b        | 0.669792448 | 0.92023006 | 0.90109336 | 1.2380151 |
| A_51_P3024 | 13382.2 Detected  | 9873.6 Detected   | 7400.1 Detected   | 8962.8 Detected  | Plscr3        | 0.669755347 | 0.55298083 | 0.90775401 | 0.7494835 |
| A_55_P2188 | 65.1 Detected     | 41.2 Detected     | 71.7 Detected     | 43.6 Detected    | 2510003B16Rik | 0.669738863 | 1.10138249 | 1.05825243 | 1.7402913 |
| A_52_P7347 | 642.8 Detected    | 391.8 Detected    | 501.6 Detected    | 430.5 Detected   | Lrrc73        | 0.669726198 | 0.78033603 | 1.09877489 | 1.280245  |
| A_55_P1985 | 34.2 Detected     | 33.6 Detected     | 22.3 Detected     | 22.9 Not Detect  | Tmem231       | 0.669590643 | 0.65204678 | 0.68154762 | 0.6636905 |
| A_55_P2124 | 13360.4 Detected  | 8407.9 Detected   | 6526.9 Detected   | 8943.8 Detected  | Ivns1abp      | 0.669426065 | 0.48852579 | 1.06373768 | 0.7762818 |
| A_55_P2048 | 4582.9 Detected   | 3600.9 Detected   | 3192.1 Detected   | 3067.2 Detected  | Zfx           | 0.669270549 | 0.69652403 | 0.85178705 | 0.8864728 |
| A_55_P1967 | 10949.4 Detected  | 7159.1 Detected   | 10422 Detected    | 7325.5 Detected  | Nr3c1         | 0.669032093 | 0.95183298 | 1.02324315 | 1.4557696 |
| A_55_P2140 | 57.1 Detected     | 50.5 Detected     | 43.7 Detected     | 38.2 Not Detect  | Ssu72         | 0.669001751 | 0.76532399 | 0.75643564 | 0.8653465 |
| A_51_P4133 | 319 Detected      | 169.4 Detected    | 230 Detected      | 213.4 Detected   | Atrx          | 0.668965517 | 0.72100313 | 1.25974026 | 1.3577332 |
| A_55_P1972 | 44.1 Detected     | 31.1 Detected     | 32.6 Detected     | 29.5 Not Detect  | 0610037L13Rik | 0.66893424  | 0.73922902 | 0.94855305 | 1.0482315 |
| A_51_P4274 | 14.8 Not Detect   | 28.6 Detected     | 5.9 Not Detect    | 9.9 Not Detect   | Mxra8         | 0.668918919 | 0.39864865 | 0.34615385 | 0.2062937 |
| A_55_P1973 | 92.4 Detected     | 72 Detected       | 69.3 Detected     | 61.8 Detected    | Trp53inp1     | 0.668831169 | 0.75       | 0.85833333 | 0.9625    |
| A_55_P2054 | 31.1 Detected     | 42.7 Detected     | 14.6 Not Detect   | 20.8 Not Detect  | Rxfp1         | 0.668810289 | 0.46945338 | 0.48711944 | 0.3419204 |
| A_55_P2156 | 16 Detected       | 9.6 Not Detect    | 8.1 Not Detect    | 10.7 Not Detect  | Ptx4          | 0.66875     | 0.50625    | 1.11458333 | 0.84375   |
| A_51_P2117 | 2520.1 Detected   | 2665.6 Detected   | 2015 Detected     | 1685.3 Detected  | Rin1          | 0.668743304 | 0.79957145 | 0.6322404  | 0.7559274 |
| A_51_P3865 | 709.6 Detected    | 549.3 Detected    | 275.5 Detected    | 474.5 Detected   | Abhd15        | 0.668686584 | 0.3882469  | 0.86382669 | 0.5015474 |
| A_51_P4786 | 13175.9 Detected  | 9767.6 Detected   | 10528.4 Detected  | 8809.9 Detected  | Asb6          | 0.668637437 | 0.79906496 | 0.90195135 | 1.0778902 |
| A_55_P2114 | 145955.8 Detected | 109208.4 Detected | 124154.2 Detected | 97588.2 Detected | Ube2i         | 0.668614745 | 0.85062875 | 0.8935961  | 1.1368558 |
| A_55_P2034 | 56143.5 Detected  | 22698.1 Detected  | 27771.2 Detected  | 37525.5 Detected | Tubb2b        | 0.668385477 | 0.49464675 | 1.6532441  | 1.2235033 |
| A_55_P2036 | 622.7 Detected    | 404.7 Detected    | 401 Detected      | 416.1 Detected   | Stk36         | 0.668219046 | 0.64396981 | 1.02816901 | 0.9908574 |
| A_51_P3815 | 222.7 Detected    | 163.1 Detected    | 200.3 Detected    | 148.8 Detected   | Stx6          | 0.668163449 | 0.89941626 | 0.91232373 | 1.2280809 |
| A_55_P1982 | 185.8 Detected    | 146.9 Detected    | 164.5 Detected    | 124.1 Detected   | Zfp708        | 0.667922497 | 0.8853606  | 0.84479238 | 1.1198094 |
| A_52_P1002 | 1313.2 Detected   | 1049.4 Detected   | 1429.7 Detected   | 877.1 Detected   | Ftsj2         | 0.667910448 | 1.08871459 | 0.83581094 | 1.3623976 |
| A_52_P3641 | 775.9 Detected    | 1219.2 Detected   | 410.2 Detected    | 518.2 Detected   | Itga5         | 0.667869571 | 0.52867638 | 0.42503281 | 0.3364501 |
| A_55_P2177 | 7349.9 Detected   | 5138.1 Detected   | 5477.3 Detected   | 4908.6 Detected  | Gnl1          | 0.667845821 | 0.74522102 | 0.95533368 | 1.0660166 |
| A_52_P5226 | 1423.1 Detected   | 933.4 Detected    | 1161.5 Detected   | 949.9 Detected   | D17Wsu92e     | 0.667486473 | 0.81617595 | 1.01767731 | 1.2443754 |
| A_55_P1957 | 56365.7 Detected  | 41893.8 Detected  | 42726.2 Detected  | 37619.7 Detected | Hnrnpa3       | 0.667421854 | 0.75801773 | 0.89797774 | 1.0198693 |
| A_55_P2025 | 5559.2 Detected   | 3301.4 Detected   | 4949.8 Detected   | 3710.2 Detected  | Tlk1          | 0.667398187 | 0.89037991 | 1.12382626 | 1.4993033 |
| A_55_P2034 | 25378.9 Detected  | 18990 Detected    | 19968.1 Detected  | 16936.4 Detected | Arfgap2       | 0.667341768 | 0.78679927 | 0.89185887 | 1.0515061 |

|            |          |          |          |            |         |            |          |            |               |             |            |            |           |
|------------|----------|----------|----------|------------|---------|------------|----------|------------|---------------|-------------|------------|------------|-----------|
| A_51_P2553 | 10013.8  | Detected | 9026.6   | Detected   | 9021.3  | Detected   | 6682.4   | Detected   | Riok2         | 0.6673191   | 0.90088678 | 0.74030089 | 0.9994128 |
| A_51_P1621 | 103.1    | Detected | 58.2     | Detected   | 72.3    | Detected   | 68.8     | Detected   | Inmt          | 0.667313288 | 0.70126091 | 1.18213058 | 1.242268  |
| A_55_P2185 | 329.1    | Detected | 239.4    | Detected   | 233.4   | Detected   | 219.6    | Detected   | Zfp428        | 0.667274385 | 0.70920693 | 0.91729323 | 0.9749373 |
| A_55_P2243 | 119.6    | Detected | 87       | Detected   | 54.8    | Detected   | 79.8     | Detected   | D930030O05Rik | 0.66722408  | 0.45819398 | 0.91724138 | 0.6298851 |
| A_55_P1988 | 157151.1 | Detected | 116612.4 | Detected   | 138616  | Detected   | 104840.7 | Detected   | Esd           | 0.667133097 | 0.88205555 | 0.89905276 | 1.1886901 |
| A_55_P2125 | 39809.9  | Detected | 28863.1  | Detected   | 36236.9 | Detected   | 26546.5  | Detected   | Ola1          | 0.666831617 | 0.91024846 | 0.91973835 | 1.255475  |
| A_51_P4446 | 14.7     | Detected | 5.3      | Not Detect | 7.2     | Not Detect | 9.8      | Not Detect | Lect1         | 0.666666667 | 0.48979592 | 1.8490566  | 1.3584906 |
| A_52_P4849 | 18.6     | Detected | 3.9      | Not Detect | 15.9    | Detected   | 12.4     | Not Detect | Nnat          | 0.666666667 | 0.85483871 | 3.17948718 | 4.0769231 |
| A_55_P2082 | 15       | Detected | 4.7      | Not Detect | 4.8     | Not Detect | 10       | Not Detect | Kidins220     | 0.666666667 | 0.32       | 2.12765957 | 1.0212766 |
| A_51_P4708 | 18.6     | Detected | 7.8      | Not Detect | 19.1    | Detected   | 12.4     | Not Detect | Cplx3         | 0.666666667 | 1.02688172 | 1.58974359 | 2.4487179 |
| A_55_P2067 | 15.9     | Detected | 9.2      | Not Detect | 3.3     | Not Detect | 10.6     | Not Detect | Prune2        | 0.666666667 | 0.20754717 | 1.15217391 | 0.3586957 |
| A_55_P2110 | 30998    | Detected | 21650.9  | Detected   | 19117.8 | Detected   | 20665.1  | Detected   | Ckap5         | 0.666659139 | 0.61674302 | 0.95446841 | 0.8830026 |
| A_55_P1985 | 3626.6   | Detected | 2101.2   | Detected   | 2367.8  | Detected   | 2417.5   | Detected   | Fhdc1         | 0.666602327 | 0.65289803 | 1.15053303 | 1.1268799 |
| A_51_P4063 | 9414.5   | Detected | 5649.2   | Detected   | 8676    | Detected   | 6275.7   | Detected   | Dnlz          | 0.666599395 | 0.92155717 | 1.11090066 | 1.5357927 |
| A_55_P1979 | 112.4    | Detected | 89.6     | Detected   | 67      | Detected   | 74.9     | Detected   | Naip1         | 0.666370107 | 0.59608541 | 0.8359375  | 0.7477679 |
| A_51_P4539 | 4400.1   | Detected | 2847.8   | Detected   | 3544.5  | Detected   | 2931.7   | Detected   | Gm11961       | 0.666280312 | 0.80554987 | 1.02946134 | 1.244645  |
| A_52_P1987 | 4540.3   | Detected | 3476     | Detected   | 3171.4  | Detected   | 3024.8   | Detected   | 1810043G02Rik | 0.666211484 | 0.6985001  | 0.87019563 | 0.9123705 |
| A_55_P2007 | 116.2    | Detected | 179      | Detected   | 99      | Detected   | 77.4     | Detected   | Zscan4a       | 0.666092943 | 0.85197935 | 0.43240223 | 0.5530726 |
| A_66_P1181 | 7947     | Detected | 5597.1   | Detected   | 7419.4  | Detected   | 5292.4   | Detected   | Ciao1         | 0.665961998 | 0.93361017 | 0.94556109 | 1.3255793 |
| A_55_P2125 | 3035.9   | Detected | 1728.4   | Detected   | 2629.1  | Detected   | 2021.5   | Detected   | Gm14440       | 0.665865147 | 0.86600349 | 1.1695788  | 1.5211178 |
| A_55_P2023 | 14364.4  | Detected | 10091    | Detected   | 13993.1 | Detected   | 9564.1   | Detected   | Mfsd10        | 0.665819665 | 0.97415137 | 0.94778516 | 1.3866911 |
| A_55_P2345 | 390.8    | Detected | 251.2    | Detected   | 242.3   | Detected   | 260.2    | Detected   | LOC552890     | 0.665813715 | 0.62001024 | 1.03582803 | 0.9645701 |
| A_55_P1996 | 38.3     | Detected | 32.4     | Detected   | 21.9    | Detected   | 25.5     | Not Detect | Itih1         | 0.665796345 | 0.57180157 | 0.78703704 | 0.6759259 |
| A_55_P2051 | 1412.3   | Detected | 1043.8   | Detected   | 665.4   | Detected   | 940.3    | Detected   | Pbx1          | 0.665793387 | 0.47114636 | 0.90084307 | 0.6374784 |
| A_55_P2107 | 765.5    | Detected | 551.1    | Detected   | 801     | Detected   | 509.6    | Detected   | Tgfb2         | 0.665708687 | 1.04637492 | 0.92469606 | 1.4534567 |
| A_55_P2113 | 31.7     | Detected | 24       | Detected   | 36.8    | Detected   | 21.1     | Not Detect | Foxo4         | 0.665615142 | 1.16088328 | 0.87916667 | 1.5333333 |
| A_55_P2136 | 24217.4  | Detected | 15713    | Detected   | 15294.4 | Detected   | 16118    | Detected   | Tom34         | 0.665554519 | 0.63154591 | 1.02577484 | 0.9733596 |
| A_55_P2132 | 6455.7   | Detected | 4347.1   | Detected   | 7592.5  | Detected   | 4296.1   | Detected   | Pbdc1         | 0.665473922 | 1.17609245 | 0.98826804 | 1.7465667 |
| A_55_P2043 | 83.1     | Detected | 74.3     | Detected   | 91      | Detected   | 55.3     | Detected   | Rpl6          | 0.665463297 | 1.09506619 | 0.74427995 | 1.2247645 |
| A_55_P2013 | 2079.1   | Detected | 3319.4   | Detected   | 2014.8  | Detected   | 1383.2   | Detected   | Slc39a14      | 0.665287865 | 0.96907316 | 0.41670181 | 0.6069772 |
| A_55_P2081 | 2833.7   | Detected | 1630.7   | Detected   | 2081.2  | Detected   | 1885.2   | Detected   | Phf20         | 0.665278611 | 0.73444613 | 1.15606795 | 1.2762617 |
| A_55_P2072 | 63529.3  | Detected | 55325    | Detected   | 40627.1 | Detected   | 42264.1  | Detected   | Msn           | 0.665269411 | 0.63950177 | 0.76392408 | 0.7343353 |
| A_55_P2037 | 41.2     | Detected | 42.9     | Detected   | 35.1    | Detected   | 27.4     | Not Detect | Ppp1r12b      | 0.665048544 | 0.85194175 | 0.63869464 | 0.8181818 |
| A_51_P3293 | 17378.7  | Detected | 6983.2   | Detected   | 18162.8 | Detected   | 11557.2  | Detected   | Mcts2         | 0.665020974 | 1.04511845 | 1.65500057 | 2.6009279 |
| A_52_P1656 | 5719.4   | Detected | 3173.5   | Detected   | 4385    | Detected   | 3802.8   | Detected   | Lsm14b        | 0.664894919 | 0.76668881 | 1.19829841 | 1.3817552 |
| A_55_P1954 | 2130.2   | Detected | 1572.8   | Detected   | 1898.4  | Detected   | 1416.3   | Detected   | Zfp652        | 0.664867149 | 0.89118393 | 0.90049593 | 1.2070193 |
| A_51_P4540 | 968.9    | Detected | 14.7     | Not Detect | 2838.4  | Detected   | 644.1    | Detected   | Lbp           | 0.664774487 | 2.92950769 | 43.8163265 | 193.08844 |
| A_55_P2105 | 17.6     | Detected | 27.7     | Detected   | 16.4    | Not Detect | 11.7     | Not Detect | E330014E10Rik | 0.664772727 | 0.93181818 | 0.42238267 | 0.5920578 |
| A_55_P2300 | 16.7     | Detected | 15.7     | Detected   | 21.9    | Detected   | 11.1     | Not Detect | D030046N08Rik | 0.664670659 | 1.31137725 | 0.70700637 | 1.3949045 |
| A_51_P2092 | 5540.1   | Detected | 3457.5   | Detected   | 3625.4  | Detected   | 3681.9   | Detected   | Rab31         | 0.664590892 | 0.65439252 | 1.06490239 | 1.0485611 |



|            |                  |                  |                  |                  |               |             |            |            |           |
|------------|------------------|------------------|------------------|------------------|---------------|-------------|------------|------------|-----------|
| A_55_P2192 | 15.5 Detected    | 16.9 Not Detect  | 13.9 Not Detect  | 10.3 Not Detect  | 4933417D19Rik | 0.664516129 | 0.89677419 | 0.60946746 | 0.8224852 |
| A_55_P2076 | 15.2 Detected    | 12 Not Detect    | 8.3 Not Detect   | 10.1 Not Detect  | Gypc          | 0.664473684 | 0.54605263 | 0.84166667 | 0.6916667 |
| A_55_P2020 | 2491.1 Detected  | 1891.5 Detected  | 1984.3 Detected  | 1655.2 Detected  | Sik2          | 0.664445426 | 0.79655574 | 0.87507269 | 1.0490616 |
| A_51_P2296 | 5769.8 Detected  | 3793.9 Detected  | 4629.5 Detected  | 3832.5 Detected  | Rprd1b        | 0.664234462 | 0.8023675  | 1.01017423 | 1.2202483 |
| A_55_P2184 | 13.7 Not Detect  | 23.1 Detected    | 3.3 Not Detect   | 9.1 Not Detect   | Pcdhb18       | 0.664233577 | 0.24087591 | 0.39393939 | 0.1428571 |
| A_55_P2269 | 372.4 Detected   | 289.5 Detected   | 287.8 Detected   | 247.3 Detected   | 5730419F03Rik | 0.664070892 | 0.77282492 | 0.85423143 | 0.9941278 |
| A_66_P1279 | 14519.5 Detected | 8949.3 Detected  | 10662.1 Detected | 9640.9 Detected  | 2210404O09Rik | 0.663996694 | 0.73432969 | 1.07727979 | 1.1913893 |
| A_66_P1397 | 3435.6 Detected  | 1656.5 Detected  | 1906.7 Detected  | 2281.2 Detected  | Cenpb         | 0.663988823 | 0.55498312 | 1.37712043 | 1.1510414 |
| A_55_P2296 | 6991.6 Detected  | 5032.1 Detected  | 2931.4 Detected  | 4642.1 Detected  | 9630010G10Rik | 0.663953888 | 0.41927456 | 0.92249757 | 0.5825401 |
| A_55_P2032 | 1462.2 Detected  | 813.3 Detected   | 1468.1 Detected  | 970.8 Detected   | Zfp932        | 0.663931063 | 1.00403502 | 1.19365548 | 1.805115  |
| A_55_P2149 | 21998.4 Detected | 13483.9 Detected | 16802.2 Detected | 14603 Detected   | Foxp4         | 0.663821005 | 0.76379191 | 1.08299528 | 1.2460935 |
| A_55_P2082 | 25390.4 Detected | 15647.2 Detected | 25417.1 Detected | 16854.6 Detected | D2Wsu81e      | 0.663817821 | 1.00105158 | 1.07716397 | 1.6243865 |
| A_55_P2295 | 104.7 Detected   | 121.8 Detected   | 98.6 Detected    | 69.5 Detected    | 5830458C19Rik | 0.663801337 | 0.9417383  | 0.57060755 | 0.8095238 |
| A_55_P2156 | 5811.3 Detected  | 2503.7 Detected  | 3442.9 Detected  | 3856.8 Detected  | Car13         | 0.6636725   | 0.59244919 | 1.54044015 | 1.3751248 |
| A_52_P1605 | 844.4 Detected   | 416.2 Detected   | 349.2 Detected   | 560.4 Detected   | Sfmbt1        | 0.663666509 | 0.41354808 | 1.34646804 | 0.8390197 |
| A_55_P1965 | 32.1 Detected    | 26.3 Detected    | 36.9 Detected    | 21.3 Not Detect  | Gm5640        | 0.663551402 | 1.14953271 | 0.80988593 | 1.4030418 |
| A_51_P2546 | 19.6 Detected    | 20.4 Detected    | 3.7 Not Detect   | 13 Not Detect    | Hdc           | 0.663265306 | 0.18877551 | 0.6372549  | 0.1813725 |
| A_51_P4541 | 262.9 Detected   | 192.5 Detected   | 179.9 Detected   | 174.3 Detected   | Msh3          | 0.66298973  | 0.6842906  | 0.90545455 | 0.9345455 |
| A_55_P2023 | 32715.6 Detected | 21717.1 Detected | 28862.1 Detected | 21685.8 Detected | Trip10        | 0.662858086 | 0.88221216 | 0.99855874 | 1.3290034 |
| A_52_P1260 | 272.3 Detected   | 283.8 Detected   | 3.5 Not Detect   | 180.4 Detected   | Pon2          | 0.662504591 | 0.01285347 | 0.63565891 | 0.0123326 |
| A_51_P2397 | 6099.1 Detected  | 8944.2 Detected  | 1051.5 Detected  | 4040.5 Detected  | Inhba         | 0.662474791 | 0.17240249 | 0.45174527 | 0.1175622 |
| A_51_P2833 | 15.7 Detected    | 128.2 Detected   | 424.6 Detected   | 10.4 Not Detect  | 1700011H14Rik | 0.662420382 | 27.044586  | 0.08112324 | 3.3120125 |
| A_55_P1957 | 15.4 Detected    | 7.8 Not Detect   | 12 Not Detect    | 10.2 Not Detect  | Ttl11         | 0.662337662 | 0.77922078 | 1.30769231 | 1.5384615 |
| A_66_P1039 | 52687.4 Detected | 42874.9 Detected | 42905 Detected   | 34892.3 Detected | Eif3m         | 0.662251316 | 0.81433132 | 0.81381648 | 1.000702  |
| A_52_P2435 | 14868.1 Detected | 12096.2 Detected | 14362.3 Detected | 9846.3 Detected  | Hsd17b12      | 0.662243326 | 0.96598086 | 0.81399944 | 1.1873398 |
| A_55_P2230 | 1773.2 Detected  | 2179.9 Detected  | 1267.1 Detected  | 1174.1 Detected  | Etv6          | 0.662136251 | 0.7145838  | 0.53860269 | 0.5812652 |
| A_51_P2305 | 1087 Detected    | 679.3 Detected   | 652.1 Detected   | 719.7 Detected   | Eil2          | 0.662097516 | 0.599908   | 1.05947299 | 0.9599588 |
| A_51_P3095 | 2217.3 Detected  | 1579.1 Detected  | 1927.5 Detected  | 1467.8 Detected  | 2700099C18Rik | 0.661976277 | 0.8693005  | 0.92951681 | 1.220632  |
| A_51_P4841 | 39566.3 Detected | 20996.6 Detected | 29924.8 Detected | 26188.6 Detected | Steap1        | 0.661891559 | 0.7563204  | 1.24727813 | 1.4252212 |
| A_51_P3260 | 768.7 Detected   | 541.8 Detected   | 604.9 Detected   | 508.7 Detected   | Zfp959        | 0.661766619 | 0.78691297 | 0.93890735 | 1.1164636 |
| A_55_P1968 | 57.9 Detected    | 91.4 Detected    | 37.7 Detected    | 38.3 Not Detect  | Gm4312        | 0.66148532  | 0.65112263 | 0.4190372  | 0.4124726 |
| A_55_P2040 | 2565.3 Detected  | 3116.4 Detected  | 1147.8 Detected  | 1696.9 Detected  | Klf7          | 0.661482088 | 0.44743305 | 0.54450648 | 0.3683096 |
| A_51_P5191 | 19.2 Detected    | 28.9 Detected    | 17.2 Detected    | 12.7 Not Detect  | Dzank1        | 0.661458333 | 0.89583333 | 0.43944637 | 0.5951557 |
| A_51_P2214 | 9007 Detected    | 7769.5 Detected  | 6998.7 Detected  | 5957.3 Detected  | Cbx6          | 0.661407794 | 0.77702898 | 0.76675462 | 0.9007916 |
| A_66_P1285 | 3669 Detected    | 3093.8 Detected  | 3164.8 Detected  | 2426.7 Detected  | Cwc22         | 0.661406378 | 0.86257836 | 0.7843752  | 1.0229491 |
| A_52_P1662 | 1634.5 Detected  | 1191.9 Detected  | 1078.9 Detected  | 1081 Detected    | Zrsr2         | 0.661364332 | 0.66007954 | 0.90695528 | 0.9051934 |
| A_55_P2038 | 139.6 Detected   | 70.8 Detected    | 131.8 Detected   | 92.3 Detected    | Ptprj         | 0.661174785 | 0.94412607 | 1.30367232 | 1.8615819 |
| A_51_P4672 | 89.1 Detected    | 200.9 Detected   | 85.9 Detected    | 58.9 Detected    | Fbn1          | 0.661054994 | 0.9640853  | 0.29318069 | 0.4275759 |
| A_66_P1009 | 585.6 Detected   | 439.2 Detected   | 406.2 Detected   | 387.1 Detected   | LOC100046091  | 0.661031421 | 0.69364754 | 0.88137523 | 0.9248634 |
| A_52_P5500 | 1874.2 Detected  | 1304 Detected    | 1474.8 Detected  | 1238.8 Detected  | NfyA          | 0.660975349 | 0.78689574 | 0.95       | 1.1309816 |

|            |          |            |         |            |          |            |         |            |               |             |            |            |           |
|------------|----------|------------|---------|------------|----------|------------|---------|------------|---------------|-------------|------------|------------|-----------|
| A_51_P1390 | 17.1     | Detected   | 25.1    | Detected   | 136.6    | Detected   | 11.3    | Not Detect | Slc38a3       | 0.660818713 | 7.98830409 | 0.4501992  | 5.4422311 |
| A_51_P2197 | 37824.2  | Detected   | 26854.8 | Detected   | 34299    | Detected   | 24989.9 | Detected   | Ola1          | 0.660685487 | 0.90680041 | 0.93055618 | 1.2772018 |
| A_52_P3392 | 77.5     | Detected   | 65.3    | Detected   | 52.8     | Detected   | 51.2    | Not Detect | Utp6          | 0.660645161 | 0.68129032 | 0.78407351 | 0.8085758 |
| A_51_P3397 | 22942.9  | Detected   | 17011.4 | Detected   | 20635.7  | Detected   | 15155.8 | Detected   | Mrps26        | 0.660587807 | 0.8994373  | 0.89092021 | 1.2130512 |
| A_51_P4410 | 152.3    | Detected   | 75.9    | Detected   | 201.5    | Detected   | 100.6   | Detected   | Smad3         | 0.660538411 | 1.32304662 | 1.32542819 | 2.654809  |
| A_55_P2158 | 6225.3   | Detected   | 7257.6  | Detected   | 2552.5   | Detected   | 4110.6  | Detected   | Jun           | 0.660305527 | 0.4100204  | 0.56638558 | 0.3517003 |
| A_55_P1986 | 30.6     | Detected   | 33.9    | Detected   | 36.3     | Detected   | 20.2    | Not Detect | Cacna1h       | 0.660130719 | 1.18627451 | 0.59587021 | 1.0707965 |
| A_52_P5825 | 42736.6  | Detected   | 22669.8 | Detected   | 35846.4  | Detected   | 28208.3 | Detected   | Mrps6         | 0.660050168 | 0.8387752  | 1.24431182 | 1.5812402 |
| A_55_P2028 | 19921.9  | Detected   | 12568.3 | Detected   | 17917.3  | Detected   | 13147.2 | Detected   | Nqo2          | 0.659937054 | 0.89937707 | 1.04606033 | 1.4255946 |
| A_66_P1153 | 2503.7   | Detected   | 2282.3  | Detected   | 2211.4   | Detected   | 1651.4  | Detected   | Orc2          | 0.659583816 | 0.88325279 | 0.72356833 | 0.9689348 |
| A_55_P1959 | 1875.9   | Detected   | 1277.4  | Detected   | 1321.3   | Detected   | 1237.1  | Detected   | Gm10324       | 0.659470121 | 0.70435524 | 0.96845154 | 1.0343667 |
| A_55_P1961 | 13.8     | Not Detect | 9       | Not Detect | 17.9     | Detected   | 9.1     | Not Detect | Atg4a         | 0.65942029  | 1.29710145 | 1.01111111 | 1.9888889 |
| A_55_P2108 | 77.8     | Detected   | 82.4    | Detected   | 90.9     | Detected   | 51.3    | Not Detect | Phf11c        | 0.659383033 | 1.16838046 | 0.62257282 | 1.1031553 |
| A_55_P2075 | 1773.8   | Detected   | 930.4   | Detected   | 1350.3   | Detected   | 1169.5  | Detected   | Gid8          | 0.659318976 | 0.76124704 | 1.25698624 | 1.4513113 |
| A_55_P1975 | 191      | Detected   | 156.7   | Detected   | 149.1    | Detected   | 125.9   | Detected   | Zfp873        | 0.659162304 | 0.78062827 | 0.80344608 | 0.9514997 |
| A_55_P2066 | 17.6     | Detected   | 15.6    | Not Detect | 24.2     | Detected   | 11.6    | Not Detect | Nsun4         | 0.659090909 | 1.375      | 0.74358974 | 1.5512821 |
| A_55_P2020 | 184.5    | Detected   | 110.4   | Detected   | 148.4    | Detected   | 121.6   | Detected   | Parp16        | 0.659078591 | 0.80433604 | 1.10144928 | 1.3442029 |
| A_66_P1308 | 822.9    | Detected   | 794.9   | Detected   | 606.3    | Detected   | 542.3   | Detected   | Samd4         | 0.659010815 | 0.73678454 | 0.68222418 | 0.7627375 |
| A_55_P2260 | 363.7    | Detected   | 148     | Detected   | 363.1    | Detected   | 239.6   | Detected   | Tcf7l2        | 0.658784713 | 0.99835029 | 1.61891892 | 2.4533784 |
| A_55_P2091 | 59.2     | Detected   | 54.4    | Detected   | 46       | Detected   | 39      | Not Detect | 4930488N24Rik | 0.658783784 | 0.77702703 | 0.71691176 | 0.8455882 |
| A_55_P2348 | 25.2     | Detected   | 17.7    | Not Detect | 11.9     | Not Detect | 16.6    | Not Detect | D430022A14Rik | 0.658730159 | 0.47222222 | 0.93785311 | 0.6723164 |
| A_52_P6308 | 11295.2  | Detected   | 5760.7  | Detected   | 12807.7  | Detected   | 7440    | Detected   | Abcc4         | 0.658686876 | 1.13390644 | 1.29150971 | 2.2232888 |
| A_51_P2777 | 3700.2   | Detected   | 3063.5  | Detected   | 2270.9   | Detected   | 2437.1  | Detected   | 2810474O19Rik | 0.658640074 | 0.61372358 | 0.79552799 | 0.7412763 |
| A_55_P2140 | 11338.8  | Detected   | 5649    | Detected   | 6898.1   | Detected   | 7464.7  | Detected   | Phka2         | 0.658332451 | 0.60836244 | 1.32141972 | 1.2211188 |
| A_51_P1415 | 15.8     | Detected   | 11.1    | Not Detect | 18       | Not Detect | 10.4    | Not Detect | Orm2          | 0.658227848 | 1.13924051 | 0.93693694 | 1.6216216 |
| A_55_P2006 | 118641.2 | Detected   | 87956.3 | Detected   | 107289.8 | Detected   | 78078.6 | Detected   | Esd           | 0.658106965 | 0.9043216  | 0.88769764 | 1.219808  |
| A_51_P4899 | 969.8    | Detected   | 1157.9  | Detected   | 332.9    | Detected   | 638.2   | Detected   | Dst           | 0.65807383  | 0.34326665 | 0.55117022 | 0.2875032 |
| A_55_P2077 | 197.7    | Detected   | 147.7   | Detected   | 275      | Detected   | 130.1   | Detected   | Mro           | 0.658067779 | 1.39099646 | 0.88083954 | 1.8618822 |
| A_55_P2144 | 15.2     | Not Detect | 22.4    | Detected   | 9.3      | Not Detect | 10      | Not Detect | 1700125H20Rik | 0.657894737 | 0.61184211 | 0.44642857 | 0.4151786 |
| A_51_P1122 | 591.8    | Detected   | 1033.8  | Detected   | 91.5     | Detected   | 389.3   | Detected   | Angel1        | 0.657823589 | 0.15461304 | 0.37657187 | 0.0885084 |
| A_66_P1210 | 56.4     | Detected   | 53.4    | Detected   | 19.7     | Detected   | 37.1    | Not Detect | Map3k8        | 0.657801418 | 0.34929078 | 0.69475655 | 0.3689139 |
| A_55_P1969 | 53436.7  | Detected   | 30350   | Detected   | 42535.9  | Detected   | 35144.3 | Detected   | Ptpmt1        | 0.657680957 | 0.79600537 | 1.15796705 | 1.4015124 |
| A_52_P5475 | 194.5    | Detected   | 223.4   | Detected   | 160.9    | Detected   | 127.9   | Detected   | Spag1         | 0.657583548 | 0.82724936 | 0.57251567 | 0.7202328 |
| A_51_P5142 | 13679.4  | Detected   | 5356.1  | Detected   | 6809.5   | Detected   | 8994.2  | Detected   | Tubb2b        | 0.657499598 | 0.4977923  | 1.67924423 | 1.2713542 |
| A_55_P2103 | 130.8    | Detected   | 60.3    | Detected   | 104.4    | Detected   | 86      | Detected   | Arid1b        | 0.657492355 | 0.79816514 | 1.42620232 | 1.7313433 |
| A_55_P1994 | 6955     | Detected   | 4949.8  | Detected   | 6965.3   | Detected   | 4572.6  | Detected   | Ppil3         | 0.657455068 | 1.00148095 | 0.9237949  | 1.4071882 |
| A_66_P1066 | 11823.5  | Detected   | 4991.6  | Detected   | 7792     | Detected   | 7770.7  | Detected   | 2900097C17Rik | 0.657225018 | 0.65902651 | 1.55675535 | 1.5610225 |
| A_51_P1937 | 1792.6   | Detected   | 347.3   | Detected   | 2822.7   | Detected   | 1178.1  | Detected   | Lrp1          | 0.65720183  | 1.57464019 | 3.39216815 | 8.1275554 |
| A_55_P2137 | 14318.5  | Detected   | 11349.1 | Detected   | 11395.9  | Detected   | 9409.3  | Detected   | B4galt3       | 0.657142857 | 0.79588644 | 0.82907896 | 1.0041237 |
| A_55_P1996 | 320.8    | Detected   | 356.1   | Detected   | 213.7    | Detected   | 210.8   | Detected   | Wdr31         | 0.657107232 | 0.66614713 | 0.59196855 | 0.6001123 |

|            |         |          |         |            |         |            |         |            |               |             |            |            |           |
|------------|---------|----------|---------|------------|---------|------------|---------|------------|---------------|-------------|------------|------------|-----------|
| A_51_P2364 | 1641.6  | Detected | 1294.5  | Detected   | 1282    | Detected   | 1078.7  | Detected   | Metap1d       | 0.657102827 | 0.78094542 | 0.83329471 | 0.9903438 |
| A_55_P2085 | 264.8   | Detected | 306.1   | Detected   | 102.2   | Detected   | 174     | Detected   | Dnaja4        | 0.657099698 | 0.38595166 | 0.56844169 | 0.3338778 |
| A_55_P2064 | 7149.1  | Detected | 4397.8  | Detected   | 4796.8  | Detected   | 4696.6  | Detected   | Cenpi         | 0.656949826 | 0.67096558 | 1.06794306 | 1.0907272 |
| A_52_P4480 | 3674.4  | Detected | 2252    | Detected   | 3982.4  | Detected   | 2412.8  | Detected   | Nit2          | 0.656651426 | 1.08382321 | 1.0714032  | 1.7683837 |
| A_55_P2059 | 73439.8 | Detected | 56209.4 | Detected   | 63016.8 | Detected   | 48214.9 | Detected   | U2af1         | 0.656522757 | 0.85807423 | 0.8577729  | 1.1211079 |
| A_55_P2117 | 877.9   | Detected | 484.5   | Detected   | 654.3   | Detected   | 576.3   | Detected   | Stard5        | 0.656452899 | 0.74530129 | 1.18947368 | 1.3504644 |
| A_51_P3041 | 433.1   | Detected | 267.9   | Detected   | 120.4   | Detected   | 284.3   | Detected   | Rtp4          | 0.656430386 | 0.27799584 | 1.06121687 | 0.4494214 |
| A_55_P1986 | 9190.3  | Detected | 7218.2  | Detected   | 6847.1  | Detected   | 6032.5  | Detected   | Brms1l        | 0.656398594 | 0.74503553 | 0.83573467 | 0.9485883 |
| A_51_P4940 | 7950    | Detected | 6282.2  | Detected   | 7574.4  | Detected   | 5217.9  | Detected   | Scaf8         | 0.656339623 | 0.95275472 | 0.83058483 | 1.2056923 |
| A_55_P1986 | 16      | Detected | 42.3    | Detected   | 6.5     | Not Detect | 10.5    | Not Detect | Mcam          | 0.65625     | 0.40625    | 0.24822695 | 0.1536643 |
| A_51_P3824 | 2294.1  | Detected | 1953    | Detected   | 1467.8  | Detected   | 1505.3  | Detected   | Itgav         | 0.656161458 | 0.63981518 | 0.77076293 | 0.7515617 |
| A_55_P1979 | 15.7    | Detected | 8.6     | Not Detect | 16.3    | Not Detect | 10.3    | Not Detect | Hras1         | 0.656050955 | 1.03821656 | 1.19767442 | 1.8953488 |
| A_55_P2136 | 189.4   | Detected | 229.9   | Detected   | 140.9   | Detected   | 124.2   | Detected   | Vpreb3        | 0.655755016 | 0.74392819 | 0.54023488 | 0.6128752 |
| A_55_P2308 | 401.4   | Detected | 299.1   | Detected   | 145.1   | Detected   | 263.2   | Detected   | Tiam1         | 0.655705032 | 0.3614848  | 0.87997325 | 0.485122  |
| A_55_P2061 | 309.9   | Detected | 266.6   | Detected   | 92.7    | Detected   | 203.2   | Detected   | Atp8b2        | 0.655695386 | 0.29912875 | 0.76219055 | 0.3477119 |
| A_55_P2005 | 32.2    | Detected | 20.1    | Detected   | 30      | Detected   | 21.1    | Not Detect | Sfi1          | 0.655279503 | 0.93167702 | 1.04975124 | 1.4925373 |
| A_55_P2075 | 72.8    | Detected | 36.1    | Detected   | 53.6    | Detected   | 47.7    | Not Detect | Pax2          | 0.65521978  | 0.73626374 | 1.32132964 | 1.4847645 |
| A_55_P2102 | 3466.1  | Detected | 2783.2  | Detected   | 2750.2  | Detected   | 2270.7  | Detected   | Acvr1         | 0.655116702 | 0.79345662 | 0.81585944 | 0.9881431 |
| A_52_P6827 | 417.7   | Detected | 159.6   | Detected   | 214.5   | Detected   | 273.6   | Detected   | Dock4         | 0.655015561 | 0.51352645 | 1.71428571 | 1.343985  |
| A_55_P2139 | 26218.1 | Detected | 19533.4 | Detected   | 22786   | Detected   | 17172.5 | Detected   | Ssb           | 0.654986441 | 0.86909425 | 0.87913522 | 1.1665148 |
| A_55_P2125 | 3888.6  | Detected | 6921.2  | Detected   | 2400.6  | Detected   | 2546.5  | Detected   | Arid5a        | 0.654862933 | 0.617343   | 0.36792753 | 0.3468474 |
| A_51_P4977 | 21.4    | Detected | 21.6    | Detected   | 18.1    | Detected   | 14      | Not Detect | Gpat2         | 0.654205607 | 0.84579439 | 0.64814815 | 0.837963  |
| A_55_P2134 | 1546.4  | Detected | 916.1   | Detected   | 1357.8  | Detected   | 1011.5  | Detected   | Eml1          | 0.654099845 | 0.87803932 | 1.1041371  | 1.4821526 |
| A_52_P1773 | 198.9   | Detected | 161.4   | Detected   | 121.8   | Detected   | 130.1   | Detected   | Intu          | 0.654097536 | 0.61236802 | 0.80607187 | 0.7546468 |
| A_55_P2044 | 18.2    | Detected | 14.3    | Not Detect | 6.3     | Not Detect | 11.9    | Not Detect | Slc13a5       | 0.653846154 | 0.34615385 | 0.83216783 | 0.4405594 |
| A_55_P2015 | 21632.3 | Detected | 13324.6 | Detected   | 15908   | Detected   | 14138.9 | Detected   | Foxp4         | 0.653601328 | 0.73538181 | 1.06111253 | 1.193882  |
| A_52_P5733 | 157.9   | Detected | 114.2   | Detected   | 202.6   | Detected   | 103.2   | Detected   | Hnrnpul1      | 0.653578214 | 1.28309056 | 0.90367776 | 1.7740806 |
| A_55_P2180 | 28      | Detected | 29.1    | Detected   | 22.5    | Detected   | 18.3    | Not Detect | Vmn1r219      | 0.653571429 | 0.80357143 | 0.62886598 | 0.7731959 |
| A_55_P1969 | 3083.7  | Detected | 1823.1  | Detected   | 2243.4  | Detected   | 2015    | Detected   | Socs6         | 0.653435808 | 0.72750268 | 1.10526027 | 1.2305414 |
| A_55_P2218 | 1999.4  | Detected | 1419.1  | Detected   | 1145.5  | Detected   | 1306.3  | Detected   | Pacs2         | 0.653346004 | 0.57292188 | 0.920513   | 0.8072017 |
| A_55_P2101 | 9480.2  | Detected | 7927.2  | Detected   | 7477.6  | Detected   | 6193.1  | Detected   | Esf1          | 0.653266809 | 0.78875973 | 0.78124685 | 0.9432839 |
| A_51_P1387 | 24908.4 | Detected | 20965.4 | Detected   | 21929.4 | Detected   | 16258.9 | Detected   | Ddx27         | 0.652747667 | 0.88040179 | 0.77551108 | 1.0459805 |
| A_55_P2186 | 31.1    | Detected | 24.8    | Detected   | 26.5    | Detected   | 20.3    | Not Detect | 2410141K09Rik | 0.652733119 | 0.85209003 | 0.81854839 | 1.0685484 |
| A_55_P1972 | 91212.6 | Detected | 88786.3 | Detected   | 78783.5 | Detected   | 59534.7 | Detected   | Nop56         | 0.652702587 | 0.86373483 | 0.67053926 | 0.8873385 |
| A_55_P2167 | 104.8   | Detected | 79      | Detected   | 120.6   | Detected   | 68.4    | Detected   | Ermard        | 0.652671756 | 1.15076336 | 0.86582278 | 1.5265823 |
| A_55_P2013 | 56997.2 | Detected | 45851.2 | Detected   | 50725   | Detected   | 37196.7 | Detected   | Raly          | 0.652605742 | 0.889956   | 0.81124812 | 1.106296  |
| A_55_P2149 | 7149    | Detected | 5960.9  | Detected   | 5587.8  | Detected   | 4665.2  | Detected   | Srf           | 0.652566793 | 0.78161981 | 0.78263349 | 0.9374088 |
| A_52_P6521 | 5323    | Detected | 2719    | Detected   | 4208.3  | Detected   | 3473.2  | Detected   | Brd3          | 0.652489198 | 0.79058801 | 1.27738139 | 1.5477381 |
| A_55_P2096 | 109.9   | Detected | 96.2    | Detected   | 74.1    | Detected   | 71.7    | Detected   | Calcoco2      | 0.652411283 | 0.67424932 | 0.74532225 | 0.7702703 |
| A_55_P2137 | 95.5    | Detected | 118.6   | Detected   | 17.7    | Not Detect | 62.3    | Detected   | Irgm2         | 0.652356021 | 0.18534031 | 0.52529511 | 0.1492411 |

|            |         |          |         |            |         |            |         |            |               |             |            |            |           |
|------------|---------|----------|---------|------------|---------|------------|---------|------------|---------------|-------------|------------|------------|-----------|
| A_52_P6762 | 86      | Detected | 58.6    | Detected   | 66.7    | Detected   | 56.1    | Detected   | Itpril1       | 0.652325581 | 0.7755814  | 0.95733788 | 1.1382253 |
| A_55_P2430 | 1541.7  | Detected | 1044.3  | Detected   | 1259.1  | Detected   | 1005.6  | Detected   | Dido1         | 0.652266978 | 0.81669586 | 0.96294168 | 1.205688  |
| A_55_P2090 | 38150   | Detected | 21577.7 | Detected   | 43879.5 | Detected   | 24878.8 | Detected   | Ppdf          | 0.652131062 | 1.15018349 | 1.15298665 | 2.0335578 |
| A_55_P2012 | 13921.2 | Detected | 12805.9 | Detected   | 11673.2 | Detected   | 9077.9  | Detected   | Cdca7         | 0.652091774 | 0.83851967 | 0.70888419 | 0.9115486 |
| A_66_P1138 | 526.1   | Detected | 318.4   | Detected   | 337.9   | Detected   | 343     | Detected   | Gm3325        | 0.651967307 | 0.64227333 | 1.07726131 | 1.0612437 |
| A_55_P2090 | 411.1   | Detected | 95.8    | Detected   | 1785.5  | Detected   | 268     | Detected   | Pilra         | 0.651909511 | 4.34322549 | 2.79749478 | 18.637787 |
| A_52_P2950 | 2128.3  | Detected | 845.8   | Detected   | 990     | Detected   | 1387.3  | Detected   | Snn           | 0.651834798 | 0.46515999 | 1.64022227 | 1.1704895 |
| A_55_P2438 | 204.7   | Detected | 112.1   | Detected   | 192.2   | Detected   | 133.4   | Detected   | Ifnar1        | 0.651685393 | 0.93893503 | 1.19000892 | 1.7145406 |
| A_55_P2148 | 15.5    | Detected | 13      | Not Detect | 3.6     | Not Detect | 10.1    | Not Detect | Pax2          | 0.651612903 | 0.23225806 | 0.77692308 | 0.2769231 |
| A_51_P2864 | 10767   | Detected | 12090.4 | Detected   | 6217.7  | Detected   | 7015.9  | Detected   | Ier3          | 0.651611405 | 0.57747748 | 0.58028684 | 0.5142675 |
| A_55_P2184 | 14838.6 | Detected | 11250.3 | Detected   | 12072.7 | Detected   | 9669    | Detected   | B4galt3       | 0.651611338 | 0.81360101 | 0.85944375 | 1.0731003 |
| A_55_P2109 | 23384.9 | Detected | 16927.8 | Detected   | 15308   | Detected   | 15236.8 | Detected   | Tmem63b       | 0.651565754 | 0.65461045 | 0.90010515 | 0.9043113 |
| A_55_P1982 | 53476.9 | Detected | 38455.1 | Detected   | 45041.2 | Detected   | 34841.7 | Detected   | Nelfcd        | 0.651528043 | 0.84225525 | 0.90603587 | 1.1712673 |
| A_55_P2156 | 6387.9  | Detected | 4322.1  | Detected   | 6235.6  | Detected   | 4161.4  | Detected   | Aar2          | 0.651450398 | 0.97615805 | 0.962819   | 1.4427246 |
| A_55_P2091 | 17.5    | Detected | 21.4    | Detected   | 22.3    | Detected   | 11.4    | Not Detect | Hps5          | 0.651428571 | 1.27428571 | 0.53271028 | 1.0420561 |
| A_66_P1353 | 26.1    | Detected | 23.8    | Detected   | 14      | Not Detect | 17      | Not Detect | 4933434120Rik | 0.651340996 | 0.53639847 | 0.71428571 | 0.5882353 |
| A_51_P3847 | 4221.7  | Detected | 2662.8  | Detected   | 3275    | Detected   | 2749.7  | Detected   | Ldb1          | 0.651325295 | 0.77575384 | 1.03263482 | 1.2299084 |
| A_55_P2046 | 22036.2 | Detected | 14395.7 | Detected   | 19073.9 | Detected   | 14347.2 | Detected   | Mapk14        | 0.651074142 | 0.8655712  | 0.99663094 | 1.324972  |
| A_55_P2009 | 10816.1 | Detected | 7400.4  | Detected   | 7582    | Detected   | 7040.7  | Detected   | Hdac6         | 0.650946275 | 0.70099204 | 0.95139452 | 1.0245392 |
| A_55_P2096 | 1087.5  | Detected | 872.7   | Detected   | 824.6   | Detected   | 707.9   | Detected   | R3hdml        | 0.650942529 | 0.75825287 | 0.81116077 | 0.9448837 |
| A_51_P3301 | 5884.7  | Detected | 6129    | Detected   | 6460    | Detected   | 3830.3  | Detected   | Pspc1         | 0.650891294 | 1.09776199 | 0.62494697 | 1.0540055 |
| A_52_P4311 | 46.4    | Detected | 41.4    | Detected   | 43.1    | Detected   | 30.2    | Not Detect | Foxn2         | 0.650862069 | 0.92887931 | 0.7294686  | 1.0410628 |
| A_55_P2112 | 337.3   | Detected | 266.1   | Detected   | 229.9   | Detected   | 219.4   | Detected   | Sepn1         | 0.650459532 | 0.68158909 | 0.82450207 | 0.8639609 |
| A_55_P2122 | 613.6   | Detected | 426.5   | Detected   | 361.8   | Detected   | 399.1   | Detected   | Tmem87b       | 0.650423729 | 0.58963494 | 0.93575615 | 0.8483001 |
| A_52_P2634 | 143.3   | Detected | 78.4    | Detected   | 138.3   | Detected   | 93.2    | Detected   | 1700021K19Rik | 0.65038381  | 0.96510816 | 1.18877551 | 1.7640306 |
| A_55_P2087 | 5053.1  | Detected | 4187.3  | Detected   | 4012.8  | Detected   | 3286.4  | Detected   | D930015E06Rik | 0.650373038 | 0.79412638 | 0.78484943 | 0.9583264 |
| A_55_P2002 | 59.2    | Detected | 52.4    | Detected   | 36.7    | Detected   | 38.5    | Not Detect | Zswim6        | 0.650337838 | 0.61993243 | 0.73473282 | 0.7003817 |
| A_55_P2116 | 16.3    | Detected | 25.7    | Detected   | 10.8    | Not Detect | 10.6    | Not Detect | Gpr183        | 0.650306748 | 0.66257669 | 0.41245136 | 0.4202335 |
| A_52_P2803 | 279.6   | Detected | 207.9   | Detected   | 167.8   | Detected   | 181.8   | Detected   | Rbm3          | 0.650214592 | 0.60014306 | 0.87445887 | 0.8071188 |
| A_52_P9023 | 1216.4  | Detected | 775.8   | Detected   | 902.8   | Detected   | 790.9   | Detected   | Lnp           | 0.650197304 | 0.74219007 | 1.01946378 | 1.163702  |
| A_55_P1979 | 14      | Detected | 11.6    | Not Detect | 11.5    | Not Detect | 9.1     | Not Detect | Lrit1         | 0.65        | 0.82142857 | 0.78448276 | 0.9913793 |
| A_51_P4863 | 18      | Detected | 15.1    | Not Detect | 12.3    | Not Detect | 11.7    | Not Detect | Ccdc171       | 0.65        | 0.68333333 | 0.77483444 | 0.8145695 |
| A_66_P1250 | 7933.8  | Detected | 5901.9  | Detected   | 6816.1  | Detected   | 5156.8  | Detected   | Ssb           | 0.649978573 | 0.85912173 | 0.87375252 | 1.1548993 |
| A_55_P2137 | 563.3   | Detected | 424.8   | Detected   | 467.7   | Detected   | 366.1   | Detected   | Bnip2         | 0.649920114 | 0.83028582 | 0.86181733 | 1.1009887 |
| A_55_P1994 | 1634.9  | Detected | 912.5   | Detected   | 1405.1  | Detected   | 1062.3  | Detected   | Arhgap11a     | 0.649764512 | 0.85944094 | 1.16416438 | 1.5398356 |
| A_51_P4709 | 1500.3  | Detected | 999.6   | Detected   | 1210.1  | Detected   | 974.8   | Detected   | Paip1         | 0.649736719 | 0.80657202 | 0.97519008 | 1.2105842 |
| A_55_P2063 | 824.6   | Detected | 536     | Detected   | 779.5   | Detected   | 535.7   | Detected   | Naip6         | 0.649648314 | 0.94530682 | 0.9994403  | 1.454291  |
| A_52_P5986 | 511     | Detected | 361.5   | Detected   | 264.6   | Detected   | 331.9   | Detected   | Ptch1         | 0.649510763 | 0.51780822 | 0.91811895 | 0.7319502 |
| A_52_P2036 | 52.2    | Detected | 64.6    | Detected   | 76.3    | Detected   | 33.9    | Not Detect | Arl5c         | 0.649425287 | 1.46168582 | 0.5247678  | 1.1811146 |
| A_51_P2650 | 10080   | Detected | 7574.2  | Detected   | 7801.2  | Detected   | 6546.2  | Detected   | Ppig          | 0.649424603 | 0.77392857 | 0.8642761  | 1.0299702 |

|            |          |          |         |            |         |            |         |            |               |             |            |            |           |
|------------|----------|----------|---------|------------|---------|------------|---------|------------|---------------|-------------|------------|------------|-----------|
| A_55_P1992 | 464.6    | Detected | 294.3   | Detected   | 475.8   | Detected   | 301.7   | Detected   | Pmpca         | 0.649375807 | 1.02410676 | 1.02514441 | 1.6167176 |
| A_55_P2179 | 429.2    | Detected | 283.6   | Detected   | 375.8   | Detected   | 278.7   | Detected   | Mapk14        | 0.649347623 | 0.87558248 | 0.98272214 | 1.3251058 |
| A_55_P1984 | 19.1     | Detected | 12.9    | Not Detect | 14.6    | Not Detect | 12.4    | Not Detect | Gm5434        | 0.64921466  | 0.76439791 | 0.96124031 | 1.1317829 |
| A_51_P3456 | 19.1     | Detected | 20.6    | Detected   | 25.3    | Detected   | 12.4    | Not Detect | Tnnt3         | 0.64921466  | 1.32460733 | 0.60194175 | 1.2281553 |
| A_55_P1986 | 1869.6   | Detected | 1482.3  | Detected   | 1431.6  | Detected   | 1213.7  | Detected   | Cdh26         | 0.649176294 | 0.76572529 | 0.81879512 | 0.9657964 |
| A_55_P2149 | 17.1     | Detected | 15.7    | Not Detect | 10      | Not Detect | 11.1    | Not Detect | Rsrc2         | 0.649122807 | 0.58479532 | 0.70700637 | 0.6369427 |
| A_51_P4710 | 128.2    | Detected | 70.8    | Detected   | 118.8   | Detected   | 83.2    | Detected   | Ablim1        | 0.648985959 | 0.92667707 | 1.17514124 | 1.6779661 |
| A_55_P1978 | 6985.6   | Detected | 5621.3  | Detected   | 4333.2  | Detected   | 4532.1  | Detected   | Kif3a         | 0.648777485 | 0.62030463 | 0.80623699 | 0.7708537 |
| A_55_P1971 | 488      | Detected | 290     | Detected   | 271.2   | Detected   | 316.6   | Detected   | Mta3          | 0.648770492 | 0.5557377  | 1.09172414 | 0.9351724 |
| A_55_P2056 | 50698.7  | Detected | 38857.9 | Detected   | 39874.4 | Detected   | 32883.8 | Detected   | Tk1           | 0.648612292 | 0.78649748 | 0.84625778 | 1.0261594 |
| A_55_P2148 | 64.3     | Detected | 103.6   | Detected   | 44.2    | Detected   | 41.7    | Not Detect | Dclk1         | 0.648522551 | 0.6874028  | 0.40250965 | 0.4266409 |
| A_55_P1972 | 12082.2  | Detected | 10913   | Detected   | 7287.5  | Detected   | 7834.4  | Detected   | Siah1b        | 0.648424956 | 0.60316002 | 0.71789609 | 0.6677815 |
| A_51_P3551 | 13670.4  | Detected | 5453.2  | Detected   | 9785.3  | Detected   | 8863.7  | Detected   | Camk2n2       | 0.648386294 | 0.71580202 | 1.6254126  | 1.7944143 |
| A_55_P2093 | 1065.3   | Detected | 823.2   | Detected   | 852.5   | Detected   | 690.6   | Detected   | Zfp428        | 0.648268093 | 0.80024406 | 0.83892128 | 1.0355928 |
| A_51_P1366 | 16.2     | Detected | 12.1    | Not Detect | 7.2     | Not Detect | 10.5    | Not Detect | Olf921        | 0.648148148 | 0.44444444 | 0.8677686  | 0.5950413 |
| A_55_P2144 | 294.7    | Detected | 255.9   | Detected   | 312.1   | Detected   | 191     | Detected   | Suv420h1      | 0.648116729 | 1.05904309 | 0.74638531 | 1.219617  |
| A_52_P6549 | 11721    | Detected | 9043.5  | Detected   | 8720    | Detected   | 7595.2  | Detected   | Eif3j2        | 0.647999317 | 0.74396383 | 0.83985183 | 0.9642285 |
| A_55_P2147 | 14.2     | Detected | 7.3     | Not Detect | 5.6     | Not Detect | 9.2     | Not Detect | Tnfaip6       | 0.647887324 | 0.3943662  | 1.26027397 | 0.7671233 |
| A_55_P2006 | 262.1    | Detected | 222.9   | Detected   | 142.8   | Detected   | 169.8   | Detected   | 2810474019Rik | 0.647844334 | 0.54483022 | 0.76177658 | 0.640646  |
| A_55_P1959 | 76.1     | Detected | 44.7    | Detected   | 37.6    | Detected   | 49.3    | Detected   | Cdkl5         | 0.6478318   | 0.49408673 | 1.10290828 | 0.8411633 |
| A_55_P2056 | 70.4     | Detected | 30.4    | Detected   | 53      | Detected   | 45.6    | Not Detect | Phkg1         | 0.647727273 | 0.75284091 | 1.5        | 1.7434211 |
| A_55_P1978 | 29.8     | Detected | 26.6    | Detected   | 23.6    | Detected   | 19.3    | Not Detect | Gm10700       | 0.647651007 | 0.79194631 | 0.72556391 | 0.887218  |
| A_51_P2158 | 420      | Detected | 219.4   | Detected   | 208.1   | Detected   | 272     | Detected   | Tsc22d4       | 0.647619048 | 0.49547619 | 1.23974476 | 0.9484959 |
| A_51_P2336 | 122855.5 | Detected | 94471.1 | Detected   | 109263  | Detected   | 79560.2 | Detected   | Psma7         | 0.647591683 | 0.88936189 | 0.84216443 | 1.1565759 |
| A_55_P1967 | 1110.3   | Detected | 567.5   | Detected   | 750.1   | Detected   | 719     | Detected   | Ston1         | 0.647572728 | 0.67558318 | 1.26696035 | 1.3217621 |
| A_55_P1968 | 13.9     | Detected | 3.2     | Not Detect | 3.2     | Not Detect | 9       | Not Detect | 4933440M02Rik | 0.647482014 | 0.23021583 | 2.8125     | 1         |
| A_55_P2086 | 31.2     | Detected | 15.5    | Not Detect | 21.9    | Detected   | 20.2    | Not Detect | Snrk          | 0.647435897 | 0.70192308 | 1.30322581 | 1.4129032 |
| A_55_P2023 | 1526.2   | Detected | 1659.8  | Detected   | 1684.5  | Detected   | 988.1   | Detected   | Txn2          | 0.647424977 | 1.10372166 | 0.59531269 | 1.0148813 |
| A_55_P2091 | 131.6    | Detected | 84.6    | Detected   | 28.8    | Detected   | 85.2    | Detected   | BC061237      | 0.647416413 | 0.21884498 | 1.0070922  | 0.3404255 |
| A_55_P2147 | 68.9     | Detected | 43.8    | Detected   | 53.7    | Detected   | 44.6    | Not Detect | BC096441      | 0.647314949 | 0.77939042 | 1.01826484 | 1.2260274 |
| A_55_P2118 | 34.3     | Detected | 27.3    | Detected   | 17.5    | Detected   | 22.2    | Not Detect | Pdzd7         | 0.647230321 | 0.51020408 | 0.81318681 | 0.6410256 |
| A_55_P2184 | 109      | Detected | 61.4    | Detected   | 73.8    | Detected   | 70.5    | Detected   | 6720489N17Rik | 0.646788991 | 0.67706422 | 1.14820847 | 1.2019544 |
| A_55_P2053 | 2161     | Detected | 1014.5  | Detected   | 1318.2  | Detected   | 1397.4  | Detected   | Pink1         | 0.646645072 | 0.60999537 | 1.3774273  | 1.2993593 |
| A_55_P2091 | 6563.9   | Detected | 5217.2  | Detected   | 4088.2  | Detected   | 4243.7  | Detected   | Raet1b        | 0.646521123 | 0.62283094 | 0.81340566 | 0.7836004 |
| A_55_P2142 | 397.1    | Detected | 184.6   | Detected   | 626.3   | Detected   | 256.7   | Detected   | 4732471J01Rik | 0.646436666 | 1.57718459 | 1.39057421 | 3.3927411 |
| A_55_P1979 | 18.1     | Detected | 29.7    | Detected   | 25.7    | Detected   | 11.7    | Not Detect | Gm16367       | 0.64640884  | 1.4198895  | 0.39393939 | 0.8653199 |
| A_51_P1879 | 30893.3  | Detected | 30143.2 | Detected   | 26026.2 | Detected   | 19967.9 | Detected   | Nop56         | 0.646350503 | 0.84245451 | 0.66243465 | 0.8634186 |
| A_52_P4792 | 27255.6  | Detected | 19727.3 | Detected   | 22666.5 | Detected   | 17615.6 | Detected   | Sdc1          | 0.646311217 | 0.83162726 | 0.89295545 | 1.1489915 |
| A_52_P2644 | 21.2     | Detected | 15.8    | Not Detect | 8.2     | Not Detect | 13.7    | Not Detect | Gstm6         | 0.646226415 | 0.38679245 | 0.86708861 | 0.5189873 |
| A_51_P4794 | 4193.6   | Detected | 3568.7  | Detected   | 2813.6  | Detected   | 2709.9  | Detected   | Rfc3          | 0.64619897  | 0.67092713 | 0.75935215 | 0.7884103 |

|            |         |          |         |            |         |            |         |            |               |             |            |            |           |
|------------|---------|----------|---------|------------|---------|------------|---------|------------|---------------|-------------|------------|------------|-----------|
| A_52_P3738 | 284.2   | Detected | 199     | Detected   | 189.5   | Detected   | 183.6   | Detected   | Pcgf3         | 0.646023927 | 0.66678395 | 0.92261307 | 0.9522613 |
| A_52_P5521 | 660.2   | Detected | 200.6   | Detected   | 187.7   | Detected   | 426.4   | Detected   | Il13ra1       | 0.645864889 | 0.28430779 | 2.12562313 | 0.9356929 |
| A_55_P2117 | 1239    | Detected | 883.2   | Detected   | 482.8   | Detected   | 800     | Detected   | Sifn9         | 0.645682002 | 0.38966909 | 0.9057971  | 0.5466486 |
| A_55_P2101 | 45816.4 | Detected | 23084.9 | Detected   | 25771.9 | Detected   | 29582.4 | Detected   | Eva1c         | 0.645672729 | 0.56250382 | 1.28146104 | 1.1163964 |
| A_55_P2054 | 412.6   | Detected | 306.6   | Detected   | 428.2   | Detected   | 266.4   | Detected   | Ctdspl2       | 0.645661658 | 1.03780902 | 0.86888454 | 1.396608  |
| A_51_P1007 | 44.3    | Detected | 29.8    | Detected   | 23.8    | Detected   | 28.6    | Not Detect | Zfp169        | 0.645598194 | 0.53724605 | 0.95973154 | 0.7986577 |
| A_55_P2087 | 65.7    | Detected | 135.3   | Detected   | 15.9    | Not Detect | 42.4    | Not Detect | Cp            | 0.645357686 | 0.24200913 | 0.31337768 | 0.1175166 |
| A_55_P2067 | 27.9    | Detected | 40.4    | Detected   | 16.2    | Not Detect | 18      | Not Detect | Def8          | 0.64516129  | 0.58064516 | 0.44554455 | 0.4009901 |
| A_55_P2111 | 87.9    | Detected | 85      | Detected   | 51.1    | Detected   | 56.7    | Detected   | Gabpb1        | 0.645051195 | 0.58134243 | 0.66705882 | 0.6011765 |
| A_55_P2196 | 163.4   | Detected | 175.1   | Detected   | 79.4    | Detected   | 105.4   | Detected   | 6330509M05Rik | 0.64504284  | 0.48592411 | 0.60194175 | 0.4534552 |
| A_55_P2124 | 23.1    | Detected | 15.8    | Not Detect | 17.2    | Not Detect | 14.9    | Not Detect | Olfir220      | 0.645021645 | 0.74458874 | 0.94303797 | 1.0886076 |
| A_55_P2009 | 13.8    | Detected | 8       | Not Detect | 11.5    | Not Detect | 8.9     | Not Detect | Psg-ps1       | 0.644927536 | 0.83333333 | 1.1125     | 1.4375    |
| A_55_P2000 | 2553.5  | Detected | 2148.9  | Detected   | 1404.6  | Detected   | 1646.6  | Detected   | Myef2         | 0.644840415 | 0.55006853 | 0.7662525  | 0.6536367 |
| A_55_P1979 | 176.5   | Detected | 181.7   | Detected   | 157.8   | Detected   | 113.8   | Detected   | Nsl1          | 0.644759207 | 0.89405099 | 0.6263071  | 0.8684645 |
| A_66_P1335 | 3545.2  | Detected | 2814    | Detected   | 3151.2  | Detected   | 2285.7  | Detected   | Glmn          | 0.644730904 | 0.88886382 | 0.81226013 | 1.1198294 |
| A_66_P1297 | 5821.8  | Detected | 3909.6  | Detected   | 4562.9  | Detected   | 3753.1  | Detected   | Dnajc24       | 0.644663163 | 0.78376104 | 0.95997033 | 1.1671015 |
| A_55_P2020 | 6012.6  | Detected | 3558.4  | Detected   | 4437.8  | Detected   | 3875.6  | Detected   | Hnrnpa3       | 0.644579716 | 0.73808336 | 1.08914119 | 1.2471335 |
| A_55_P2411 | 218     | Detected | 120.8   | Detected   | 164.8   | Detected   | 140.5   | Detected   | AI596198      | 0.644495413 | 0.7559633  | 1.16307947 | 1.3642384 |
| A_55_P2088 | 113.3   | Detected | 90.2    | Detected   | 75.3    | Detected   | 73      | Detected   | Zbtb37        | 0.644307149 | 0.66460724 | 0.80931264 | 0.8348115 |
| A_55_P2126 | 11759.8 | Detected | 12524   | Detected   | 10714   | Detected   | 7576.5  | Detected   | 1810032O08Rik | 0.644271161 | 0.91106992 | 0.60495848 | 0.8554775 |
| A_55_P2051 | 14902   | Detected | 10235   | Detected   | 12571.8 | Detected   | 9599.5  | Detected   | Rnf8          | 0.644175278 | 0.84363173 | 0.93790914 | 1.2283146 |
| A_55_P2063 | 536.2   | Detected | 454.6   | Detected   | 287.4   | Detected   | 345.4   | Detected   | Pdpx          | 0.644162626 | 0.53599403 | 0.75978883 | 0.6322041 |
| A_52_P2148 | 3115.5  | Detected | 2260    | Detected   | 2872.2  | Detected   | 2006.4  | Detected   | Stx6          | 0.644005778 | 0.9219066  | 0.88778761 | 1.270885  |
| A_51_P5035 | 8659.1  | Detected | 5841.3  | Detected   | 5742.5  | Detected   | 5576.1  | Detected   | Zfp414        | 0.643958379 | 0.66317516 | 0.95459915 | 0.983086  |
| A_55_P1989 | 955.3   | Detected | 882.7   | Detected   | 767.2   | Detected   | 615     | Detected   | Tasp1         | 0.643776824 | 0.8030985  | 0.69672595 | 0.8691515 |
| A_55_P2008 | 770.5   | Detected | 459.2   | Detected   | 680.4   | Detected   | 496     | Detected   | B4galt7       | 0.643737833 | 0.88306295 | 1.08013937 | 1.4817073 |
| A_55_P2113 | 17975.4 | Detected | 10498.8 | Detected   | 16840.4 | Detected   | 11568.8 | Detected   | Eml1          | 0.643590685 | 0.93685815 | 1.10191641 | 1.6040309 |
| A_55_P2183 | 1559.4  | Detected | 1080.7  | Detected   | 2274.3  | Detected   | 1003.4  | Detected   | Zfp787        | 0.64345261  | 1.45844556 | 0.92847229 | 2.1044693 |
| A_51_P4784 | 14.3    | Detected | 7.7     | Not Detect | 17.9    | Detected   | 9.2     | Not Detect | Crb1          | 0.643356643 | 1.25174825 | 1.19480519 | 2.3246753 |
| A_52_P2808 | 17.1    | Detected | 13      | Not Detect | 10.4    | Not Detect | 11      | Not Detect | Defb34        | 0.643274854 | 0.60818713 | 0.84615385 | 0.8       |
| A_55_P2216 | 39.5    | Detected | 23      | Detected   | 30      | Detected   | 25.4    | Not Detect | A830021M18Rik | 0.643037975 | 0.75949367 | 1.10434783 | 1.3043478 |
| A_55_P2049 | 404.2   | Detected | 346     | Detected   | 258.5   | Detected   | 259.9   | Detected   | Araf          | 0.642998516 | 0.63953488 | 0.75115607 | 0.7471098 |
| A_55_P2076 | 16.8    | Detected | 18.6    | Not Detect | 11.1    | Not Detect | 10.8    | Not Detect | Lef1          | 0.642857143 | 0.66071429 | 0.58064516 | 0.5967742 |
| A_52_P8956 | 1182.3  | Detected | 1715    | Detected   | 731.2   | Detected   | 759.8   | Detected   | Rhob          | 0.642645691 | 0.61845555 | 0.44303207 | 0.4263557 |
| A_55_P2071 | 49.8    | Detected | 62.7    | Detected   | 3.1     | Not Detect | 32      | Not Detect | Pr16a1        | 0.642570281 | 0.062249   | 0.51036683 | 0.0494418 |
| A_52_P1843 | 15.1    | Detected | 3.4     | Not Detect | 12.4    | Not Detect | 9.7     | Not Detect | Actl6b        | 0.642384106 | 0.82119205 | 2.85294118 | 3.6470588 |
| A_55_P2108 | 15.1    | Detected | 4.5     | Not Detect | 7.8     | Not Detect | 9.7     | Not Detect | Gjc3          | 0.642384106 | 0.51655629 | 2.15555556 | 1.7333333 |
| A_51_P4627 | 15.1    | Detected | 5.6     | Not Detect | 7.6     | Not Detect | 9.7     | Not Detect | Camkmt        | 0.642384106 | 0.50331126 | 1.73214286 | 1.3571429 |
| A_55_P2064 | 38264   | Detected | 26355.4 | Detected   | 33612.9 | Detected   | 24573.5 | Detected   | Nxt1          | 0.642209387 | 0.8784471  | 0.93238957 | 1.2753705 |
| A_55_P1961 | 208.3   | Detected | 182.7   | Detected   | 270.6   | Detected   | 133.7   | Detected   | Zfand5        | 0.641862698 | 1.29908785 | 0.73180077 | 1.4811166 |

|            |          |            |         |            |         |            |         |            |               |             |            |            |           |
|------------|----------|------------|---------|------------|---------|------------|---------|------------|---------------|-------------|------------|------------|-----------|
| A_51_P3041 | 843.6    | Detected   | 1188.2  | Detected   | 657.4   | Detected   | 541.4   | Detected   | Slc29a2       | 0.641773352 | 0.77927928 | 0.4556472  | 0.5532739 |
| A_52_P5097 | 5974.2   | Detected   | 3804.1  | Detected   | 4172.1  | Detected   | 3833.1  | Detected   | Nup160        | 0.641608918 | 0.69835292 | 1.00762335 | 1.0967377 |
| A_55_P1977 | 22357.7  | Detected   | 11582.2 | Detected   | 19170.8 | Detected   | 14342.7 | Detected   | Dab2ip        | 0.641510531 | 0.8574585  | 1.23833987 | 1.655195  |
| A_52_P4758 | 2568.7   | Detected   | 1999.6  | Detected   | 1438.8  | Detected   | 1647.5  | Detected   | Tmem29        | 0.641375015 | 0.56012769 | 0.82391478 | 0.7195439 |
| A_55_P2391 | 332.6    | Detected   | 305.1   | Detected   | 243.5   | Detected   | 213.2   | Detected   | Ankle2        | 0.641010222 | 0.73211064 | 0.69878728 | 0.798099  |
| A_66_P1115 | 46055.3  | Detected   | 19831.2 | Detected   | 41934.6 | Detected   | 29520.6 | Detected   | Ccnd1         | 0.640981603 | 0.91052713 | 1.48859373 | 2.114577  |
| A_55_P1966 | 31287.4  | Detected   | 27298.2 | Detected   | 24682.6 | Detected   | 20052   | Detected   | Fez2          | 0.640896975 | 0.78889905 | 0.73455393 | 0.9041842 |
| A_55_P2090 | 78.8     | Detected   | 77.4    | Detected   | 90.9    | Detected   | 50.5    | Not Detect | Ilkap         | 0.640862944 | 1.1535533  | 0.65245478 | 1.1744186 |
| A_55_P1975 | 55.4     | Detected   | 4.6     | Not Detect | 8.1     | Not Detect | 35.5    | Not Detect | Bcl2l15       | 0.640794224 | 0.14620939 | 7.7173913  | 1.7608696 |
| A_55_P2388 | 15.3     | Detected   | 24.5    | Detected   | 21.3    | Detected   | 9.8     | Not Detect | 1700003G18Rik | 0.640522876 | 1.39215686 | 0.4        | 0.8693878 |
| A_52_P2347 | 5121.4   | Detected   | 3760.5  | Detected   | 2420.5  | Detected   | 3279.6  | Detected   | Pkd2          | 0.640371773 | 0.47262467 | 0.87211807 | 0.6436644 |
| A_55_P2066 | 14082.8  | Detected   | 9086.6  | Detected   | 12693.6 | Detected   | 9016.9  | Detected   | Zfand3        | 0.640277502 | 0.90135484 | 0.99232936 | 1.3969582 |
| A_55_P1962 | 16.4     | Detected   | 7.8     | Not Detect | 8.1     | Not Detect | 10.5    | Not Detect | B230319C09Rik | 0.640243902 | 0.49390244 | 1.34615385 | 1.0384615 |
| A_55_P2019 | 808.1    | Detected   | 592.5   | Detected   | 426.2   | Detected   | 517.3   | Detected   | Gsto2         | 0.640143547 | 0.52740997 | 0.87308017 | 0.7193249 |
| A_66_P1341 | 394.5    | Detected   | 273     | Detected   | 138.8   | Detected   | 252.5   | Detected   | Snx30         | 0.640050697 | 0.35183777 | 0.92490842 | 0.5084249 |
| A_55_P1982 | 102755.8 | Detected   | 78223.2 | Detected   | 76648.3 | Detected   | 65752.5 | Detected   | Hnrnpa3       | 0.639890887 | 0.74592675 | 0.84057543 | 0.9798666 |
| A_55_P1954 | 18.6     | Detected   | 16.1    | Not Detect | 3.4     | Not Detect | 11.9    | Not Detect | Col26a1       | 0.639784946 | 0.1827957  | 0.73913043 | 0.2111801 |
| A_52_P4351 | 421.4    | Detected   | 417.4   | Detected   | 243.8   | Detected   | 269.6   | Detected   | Stard13       | 0.639772188 | 0.5785477  | 0.64590321 | 0.584092  |
| A_55_P2003 | 129      | Detected   | 123.2   | Detected   | 70.6    | Detected   | 82.5    | Detected   | Kng1          | 0.639534884 | 0.54728682 | 0.66964286 | 0.5730519 |
| A_55_P2086 | 17.2     | Detected   | 16.6    | Not Detect | 24.9    | Detected   | 11      | Not Detect | Col23a1       | 0.639534884 | 1.44767442 | 0.6626506  | 1.5       |
| A_55_P2173 | 14.7     | Detected   | 15.9    | Not Detect | 13.6    | Not Detect | 9.4     | Not Detect | Samd3         | 0.639455782 | 0.92517007 | 0.59119497 | 0.8553459 |
| A_55_P2001 | 18624.6  | Detected   | 12128.1 | Detected   | 12102.6 | Detected   | 11908.8 | Detected   | Oser1         | 0.63941239  | 0.64981798 | 0.98191803 | 0.9978974 |
| A_55_P2033 | 25662    | Detected   | 11300.9 | Detected   | 14670.1 | Detected   | 16407.3 | Detected   | Srxn1         | 0.639361702 | 0.57166628 | 1.45185782 | 1.2981355 |
| A_52_P3534 | 1117.8   | Detected   | 1010.8  | Detected   | 1035.3  | Detected   | 714.6   | Detected   | Gm2a          | 0.639291465 | 0.92619431 | 0.70696478 | 1.0242382 |
| A_55_P1964 | 43.8     | Detected   | 20.8    | Detected   | 66.5    | Detected   | 28      | Not Detect | Kctd14        | 0.639269406 | 1.51826484 | 1.34615385 | 3.1971154 |
| A_55_P2098 | 7961.1   | Detected   | 5187.2  | Detected   | 6503.9  | Detected   | 5089.2  | Detected   | Ttc21b        | 0.639258394 | 0.81695997 | 0.98110734 | 1.2538364 |
| A_55_P1993 | 8454.2   | Detected   | 5194.9  | Detected   | 6496.9  | Detected   | 5401.6  | Detected   | Zfp947        | 0.638925031 | 0.76848194 | 1.03978902 | 1.2506304 |
| A_52_P6833 | 19.1     | Detected   | 21.2    | Detected   | 20.8    | Detected   | 12.2    | Not Detect | AY074887      | 0.638743455 | 1.08900524 | 0.5754717  | 0.9811321 |
| A_55_P2413 | 368.4    | Detected   | 281.8   | Detected   | 272.7   | Detected   | 235.3   | Detected   | C130090I23Rik | 0.638707926 | 0.74022801 | 0.83498935 | 0.9677076 |
| A_52_P6021 | 16.6     | Detected   | 27.2    | Detected   | 14.3    | Not Detect | 10.6    | Not Detect | Sned1         | 0.638554217 | 0.86144578 | 0.38970588 | 0.5257353 |
| A_55_P2117 | 112.3    | Detected   | 198.8   | Detected   | 54      | Detected   | 71.7    | Detected   | Cacng7        | 0.638468388 | 0.48085485 | 0.36066398 | 0.2716298 |
| A_55_P2028 | 13       | Not Detect | 16.4    | Detected   | 10.3    | Not Detect | 8.3     | Not Detect | A430107P09Rik | 0.638461538 | 0.79230769 | 0.50609756 | 0.6280488 |
| A_51_P1682 | 59.7     | Detected   | 156.1   | Detected   | 24.7    | Detected   | 38.1    | Not Detect | Aig1          | 0.638190955 | 0.41373534 | 0.24407431 | 0.1582319 |
| A_55_P2065 | 421.9    | Detected   | 253.9   | Detected   | 258.4   | Detected   | 269.1   | Detected   | Camsap1       | 0.637828869 | 0.61246741 | 1.05986609 | 1.0177235 |
| A_55_P2122 | 4436.6   | Detected   | 4103.4  | Detected   | 3020.5  | Detected   | 2829.1  | Detected   | Csnk1e        | 0.637672993 | 0.68081414 | 0.68945265 | 0.7360969 |
| A_52_P5018 | 64.3     | Detected   | 55.5    | Detected   | 42      | Detected   | 41      | Not Detect | Ccdc173       | 0.637636081 | 0.65318818 | 0.73873874 | 0.7567568 |
| A_55_P2149 | 7101.3   | Detected   | 4780.3  | Detected   | 6997.6  | Detected   | 4526.5  | Detected   | Aar2          | 0.637418501 | 0.98539704 | 0.9469071  | 1.4638412 |
| A_55_P2035 | 60.4     | Detected   | 54.3    | Detected   | 44.5    | Detected   | 38.5    | Not Detect | Cyb5d1        | 0.637417219 | 0.73675497 | 0.70902394 | 0.8195212 |
| A_51_P4649 | 199.4    | Detected   | 115.2   | Detected   | 181.5   | Detected   | 127.1   | Detected   | Gabbr1        | 0.637412237 | 0.91023069 | 1.10329861 | 1.5755208 |
| A_52_P2608 | 6736.8   | Detected   | 3561.5  | Detected   | 5240.2  | Detected   | 4293.3  | Detected   | Card10        | 0.637290702 | 0.77784705 | 1.20547522 | 1.4713463 |

|            |                  |                  |                  |                  |               |             |            |            |           |
|------------|------------------|------------------|------------------|------------------|---------------|-------------|------------|------------|-----------|
| A_55_P2097 | 184 Detected     | 119.6 Detected   | 140.6 Detected   | 117.2 Detected   | Ptpn1         | 0.636956522 | 0.76413043 | 0.97993311 | 1.1755853 |
| A_52_P5421 | 1285.5 Detected  | 814.2 Detected   | 788.1 Detected   | 818.8 Detected   | Rb1cc1        | 0.636950603 | 0.61306884 | 1.00564972 | 0.967944  |
| A_52_P3181 | 56630.6 Detected | 54044.5 Detected | 55860.5 Detected | 36070.8 Detected | 1110038B12Rik | 0.636948929 | 0.98640134 | 0.66742777 | 1.0336019 |
| A_55_P2161 | 44.6 Detected    | 31.3 Detected    | 47.9 Detected    | 28.4 Not Detect  | LOC101055747  | 0.6367713   | 1.07399103 | 0.90734824 | 1.5303514 |
| A_52_P4513 | 7769.4 Detected  | 5287.7 Detected  | 6577.8 Detected  | 4945.4 Detected  | Twsg1         | 0.636522769 | 0.84662908 | 0.93526486 | 1.2439813 |
| A_55_P2047 | 26.4 Detected    | 33.7 Detected    | 25.8 Detected    | 16.8 Not Detect  | Pla2g1b       | 0.636363636 | 0.97727273 | 0.49851632 | 0.7655786 |
| A_55_P2134 | 23.1 Detected    | 24.1 Detected    | 10 Not Detect    | 14.7 Not Detect  | Med12l        | 0.636363636 | 0.43290043 | 0.60995851 | 0.4149378 |
| A_55_P1988 | 2718.9 Detected  | 558.6 Detected   | 2476.8 Detected  | 1729.7 Detected  | Add3          | 0.636176395 | 0.91095664 | 3.09649123 | 4.433942  |
| A_55_P2335 | 15.1 Detected    | 10.6 Not Detect  | 17.4 Detected    | 9.6 Not Detect   | 2900009J06Rik | 0.635761589 | 1.15231788 | 0.90566038 | 1.6415094 |
| A_55_P2031 | 14 Detected      | 14.6 Not Detect  | 13.2 Not Detect  | 8.9 Not Detect   | LOC633282     | 0.635714286 | 0.94285714 | 0.60958904 | 0.9041096 |
| A_51_P4313 | 915.3 Detected   | 695.9 Detected   | 567.7 Detected   | 581.8 Detected   | Ube2w         | 0.635638588 | 0.6202338  | 0.83603966 | 0.8157781 |
| A_52_P2801 | 156.8 Detected   | 84.8 Detected    | 94.6 Detected    | 99.6 Detected    | Dock4         | 0.635204082 | 0.60331633 | 1.1745283  | 1.115566  |
| A_55_P2185 | 44997.8 Detected | 28121.5 Detected | 32325.8 Detected | 28582.5 Detected | Rbms1         | 0.635197721 | 0.71838623 | 1.01639315 | 1.1495048 |
| A_55_P2134 | 339.3 Detected   | 390.1 Detected   | 219.4 Detected   | 215.5 Detected   | Wdr31         | 0.635131152 | 0.64662541 | 0.55242246 | 0.5624199 |
| A_51_P3253 | 10626.6 Detected | 6765.8 Detected  | 7925.4 Detected  | 6748.1 Detected  | Papd4         | 0.635019668 | 0.74580769 | 0.9973839  | 1.1713914 |
| A_55_P2014 | 44.1 Detected    | 37.4 Detected    | 31.3 Detected    | 28 Not Detect    | Yy2           | 0.634920635 | 0.70975057 | 0.7486631  | 0.8368984 |
| A_55_P2243 | 35.6 Detected    | 21.2 Detected    | 22.5 Detected    | 22.6 Not Detect  | 9530097N15Rik | 0.634831461 | 0.63202247 | 1.06603774 | 1.0613208 |
| A_51_P4534 | 16.7 Detected    | 5.8 Not Detect   | 15 Not Detect    | 10.6 Not Detect  | Ror1          | 0.634730539 | 0.89820359 | 1.82758621 | 2.5862069 |
| A_55_P1988 | 15.6 Detected    | 4.5 Not Detect   | 7.5 Not Detect   | 9.9 Not Detect   | Klrg1         | 0.634615385 | 0.48076923 | 2.2        | 1.6666667 |
| A_51_P4773 | 445.4 Detected   | 492.3 Detected   | 251.6 Detected   | 282.6 Detected   | Rhob          | 0.634485855 | 0.5648855  | 0.57404022 | 0.5110705 |
| A_52_P1254 | 42.4 Detected    | 30.8 Detected    | 44.7 Detected    | 26.9 Not Detect  | Reep2         | 0.634433962 | 1.05424528 | 0.87337662 | 1.4512987 |
| A_51_P2210 | 54767.9 Detected | 26655.4 Detected | 44925.6 Detected | 34742.6 Detected | Cd47          | 0.634360638 | 0.82029072 | 1.30339819 | 1.6854221 |
| A_51_P1234 | 9515.6 Detected  | 6887.3 Detected  | 8104.1 Detected  | 6035.8 Detected  | Bub1          | 0.634305772 | 0.85166463 | 0.87636665 | 1.176673  |
| A_55_P1953 | 5224 Detected    | 2651.4 Detected  | 1446.3 Detected  | 3313.6 Detected  | Nes           | 0.634303216 | 0.27685681 | 1.24975485 | 0.5454854 |
| A_55_P1977 | 35.8 Detected    | 33.8 Detected    | 11.2 Not Detect  | 22.7 Not Detect  | Gfi1          | 0.634078212 | 0.31284916 | 0.67159763 | 0.3313609 |
| A_55_P1982 | 3804.7 Detected  | 2307 Detected    | 3549.2 Detected  | 2412.2 Detected  | Cyhr1         | 0.634005309 | 0.93284622 | 1.04560035 | 1.5384482 |
| A_55_P2037 | 802.4 Detected   | 393.3 Detected   | 542.3 Detected   | 508.7 Detected   | Brd3          | 0.633973081 | 0.67584746 | 1.2934147  | 1.3788457 |
| A_51_P3977 | 2279.2 Detected  | 1245.2 Detected  | 1612.4 Detected  | 1444.6 Detected  | Csnk2a1       | 0.633818884 | 0.70744121 | 1.16013492 | 1.2948924 |
| A_66_P1297 | 85.2 Detected    | 56.4 Detected    | 65.8 Detected    | 54 Detected      | Sik2          | 0.633802817 | 0.77230047 | 0.95744681 | 1.1666667 |
| A_55_P2022 | 6146.6 Detected  | 3755.8 Detected  | 3190.2 Detected  | 3895.5 Detected  | Mta3          | 0.633765008 | 0.51901864 | 1.0371958  | 0.8494063 |
| A_55_P2055 | 31.4 Detected    | 27.1 Detected    | 16.5 Detected    | 19.9 Not Detect  | Vmn1r48       | 0.633757962 | 0.52547771 | 0.73431734 | 0.6088561 |
| A_55_P1972 | 49.4 Detected    | 35.2 Detected    | 36.5 Detected    | 31.3 Not Detect  | Arhgap27      | 0.633603239 | 0.7388664  | 0.88920455 | 1.0369318 |
| A_55_P1980 | 69548.1 Detected | 48647.5 Detected | 54610.7 Detected | 44062.1 Detected | Aurka         | 0.63354858  | 0.78522203 | 0.90574233 | 1.1225798 |
| A_55_P2024 | 45 Detected      | 21.7 Detected    | 21.6 Detected    | 28.5 Not Detect  | Gm4221        | 0.633333333 | 0.48       | 1.31336406 | 0.9953917 |
| A_55_P2184 | 15 Detected      | 27 Detected      | 14.2 Not Detect  | 9.5 Not Detect   | Itgal         | 0.633333333 | 0.94666667 | 0.35185185 | 0.5259259 |
| A_55_P2035 | 40970.6 Detected | 28084 Detected   | 29519.2 Detected | 25947.1 Detected | Uhrf1         | 0.633310227 | 0.72049714 | 0.92391041 | 1.0511038 |
| A_51_P3805 | 6460.4 Detected  | 4419.8 Detected  | 4745.4 Detected  | 4090.8 Detected  | Tjap1         | 0.633211566 | 0.73453656 | 0.92556224 | 1.0736685 |
| A_55_P1992 | 34.6 Detected    | 21 Detected      | 20.3 Detected    | 21.9 Not Detect  | Mboat7        | 0.632947977 | 0.5867052  | 1.04285714 | 0.9666667 |
| A_55_P2173 | 15.8 Detected    | 11.6 Not Detect  | 8.1 Not Detect   | 10 Not Detect    | Pla2g2d       | 0.632911392 | 0.51265823 | 0.86206897 | 0.6982759 |
| A_66_P1404 | 47.1 Detected    | 45.6 Detected    | 26.7 Detected    | 29.8 Not Detect  | D430018E03Rik | 0.632696391 | 0.56687898 | 0.65350877 | 0.5855263 |



|            |                  |                  |                  |                  |               |             |            |            |           |
|------------|------------------|------------------|------------------|------------------|---------------|-------------|------------|------------|-----------|
| A_55_P1993 | 14.7 Detected    | 3.3 Not Detect   | 3.4 Not Detect   | 9.3 Not Detect   | Ascl4         | 0.632653061 | 0.23129252 | 2.81818182 | 1.030303  |
| A_52_P9346 | 3324.8 Detected  | 2689.8 Detected  | 3075.2 Detected  | 2102.7 Detected  | Sdc4          | 0.632429018 | 0.92492782 | 0.78173098 | 1.143282  |
| A_55_P2162 | 7714.7 Detected  | 5063.5 Detected  | 5643.1 Detected  | 4878.8 Detected  | Dnajc24       | 0.632403075 | 0.73147368 | 0.96352325 | 1.1144663 |
| A_55_P2013 | 811.9 Detected   | 518.5 Detected   | 670.3 Detected   | 513.2 Detected   | Gm14305       | 0.632097549 | 0.82559429 | 0.98977821 | 1.2927676 |
| A_55_P2068 | 7657 Detected    | 5051.3 Detected  | 6280.6 Detected  | 4839.8 Detected  | Arfgap1       | 0.632075225 | 0.82024291 | 0.95812959 | 1.2433631 |
| A_55_P2246 | 14.4 Detected    | 7.7 Not Detect   | 3.9 Not Detect   | 9.1 Not Detect   | 5430434115Rik | 0.631944444 | 0.27083333 | 1.18181818 | 0.5064935 |
| A_55_P2118 | 17078.2 Detected | 13771 Detected   | 12843.9 Detected | 10791.7 Detected | Chpf          | 0.631899146 | 0.75206403 | 0.78365406 | 0.9326774 |
| A_52_P2367 | 20.1 Detected    | 18.4 Detected    | 4.7 Not Detect   | 12.7 Not Detect  | Sp7           | 0.631840796 | 0.23383085 | 0.69021739 | 0.2554348 |
| A_55_P2052 | 452.1 Detected   | 276.5 Detected   | 292.8 Detected   | 285.6 Detected   | Cask          | 0.631718646 | 0.64764433 | 1.03291139 | 1.0589512 |
| A_52_P5626 | 194.4 Detected   | 147.2 Detected   | 127.6 Detected   | 122.8 Detected   | Srd5a1        | 0.631687243 | 0.6563786  | 0.83423913 | 0.8668478 |
| A_51_P4792 | 53.2 Detected    | 46.6 Detected    | 29.8 Detected    | 33.6 Not Detect  | Nat8          | 0.631578947 | 0.56015038 | 0.72103004 | 0.639485  |
| A_51_P4230 | 18037.9 Detected | 9173.3 Detected  | 10679.2 Detected | 11390 Detected   | Flot1         | 0.631448228 | 0.59204231 | 1.24164695 | 1.1641612 |
| A_55_P2021 | 759.7 Detected   | 574.7 Detected   | 737 Detected     | 479.6 Detected   | Klh15         | 0.63130183  | 0.97011978 | 0.83452236 | 1.2824082 |
| A_51_P3484 | 767.9 Detected   | 539.1 Detected   | 486.6 Detected   | 484.7 Detected   | Rest          | 0.631201979 | 0.63367626 | 0.89909108 | 0.9026155 |
| A_51_P3797 | 34.7 Detected    | 30.8 Detected    | 21.9 Detected    | 21.9 Not Detect  | Myoz1         | 0.631123919 | 0.63112392 | 0.71103896 | 0.711039  |
| A_55_P2137 | 22.5 Detected    | 91.7 Detected    | 30 Detected      | 14.2 Not Detect  | AA467197      | 0.631111111 | 1.33333333 | 0.15485278 | 0.3271538 |
| A_55_P2182 | 68361.6 Detected | 31898.5 Detected | 53113.6 Detected | 43137.7 Detected | Cd47          | 0.631022387 | 0.7769508  | 1.35234259 | 1.6650814 |
| A_52_P4809 | 25203 Detected   | 19266.9 Detected | 24243 Detected   | 15903.3 Detected | Tnpo1         | 0.631008213 | 0.9619093  | 0.8254208  | 1.258272  |
| A_51_P5174 | 490.5 Detected   | 987.1 Detected   | 12 Not Detect    | 309.5 Detected   | Cd1d1         | 0.630988787 | 0.02446483 | 0.31354473 | 0.0121568 |
| A_55_P2052 | 2721.5 Detected  | 2525.2 Detected  | 1997.4 Detected  | 1716.9 Detected  | Zfp280c       | 0.630865332 | 0.73393349 | 0.67990654 | 0.7909869 |
| A_55_P2163 | 145.9 Detected   | 100.3 Detected   | 94 Detected      | 92 Detected      | Fktn          | 0.630568883 | 0.6442769  | 0.91724826 | 0.9371884 |
| A_55_P2002 | 85.8 Detected    | 58.1 Detected    | 50.6 Detected    | 54.1 Detected    | Inpp4a        | 0.630536131 | 0.58974359 | 0.93115318 | 0.8709122 |
| A_55_P2037 | 5188 Detected    | 6659.3 Detected  | 3444.5 Detected  | 3270 Detected    | Palmd         | 0.630300694 | 0.66393601 | 0.4910426  | 0.5172466 |
| A_51_P3647 | 6191.2 Detected  | 4815.3 Detected  | 5487.3 Detected  | 3901 Detected    | U2af1         | 0.630087867 | 0.88630637 | 0.81012606 | 1.1395552 |
| A_55_P2048 | 17.3 Detected    | 15.9 Not Detect  | 18.4 Not Detect  | 10.9 Not Detect  | Scgb1b30      | 0.630057803 | 1.06358382 | 0.68553459 | 1.1572327 |
| A_55_P2293 | 42.7 Detected    | 35.2 Detected    | 32.6 Detected    | 26.9 Not Detect  | 4930545H06Rik | 0.629976581 | 0.76346604 | 0.76420455 | 0.9261364 |
| A_51_P3171 | 18.1 Detected    | 50.9 Detected    | 3.3 Not Detect   | 11.4 Not Detect  | Pcdhb21       | 0.629834254 | 0.18232044 | 0.22396857 | 0.064833  |
| A_52_P4678 | 16.2 Detected    | 14 Not Detect    | 17.1 Not Detect  | 10.2 Not Detect  | Urad          | 0.62962963  | 1.05555556 | 0.72857143 | 1.2214286 |
| A_52_P6019 | 41656.8 Detected | 23379.6 Detected | 27822.7 Detected | 26227.5 Detected | Lemd2         | 0.629609091 | 0.66790296 | 1.12181132 | 1.1900417 |
| A_52_P3055 | 1217.9 Detected  | 788.7 Detected   | 864.8 Detected   | 766.8 Detected   | Acp2          | 0.629608342 | 0.71007472 | 0.97223279 | 1.0964879 |
| A_55_P1998 | 6966 Detected    | 2224.4 Detected  | 2980.1 Detected  | 4385.8 Detected  | Entpd5        | 0.629600919 | 0.42780649 | 1.97167776 | 1.3397321 |
| A_55_P2180 | 4646.1 Detected  | 3135.3 Detected  | 4086.1 Detected  | 2924.3 Detected  | Uqcc1         | 0.629409612 | 0.8794688  | 0.93270181 | 1.3032565 |
| A_55_P2119 | 48.3 Detected    | 20.4 Detected    | 36.6 Detected    | 30.4 Not Detect  | Gnal          | 0.629399586 | 0.75776398 | 1.49019608 | 1.7941176 |
| A_51_P3057 | 14.3 Detected    | 3.2 Not Detect   | 3.3 Not Detect   | 9 Not Detect     | Gm9801        | 0.629370629 | 0.23076923 | 2.8125     | 1.03125   |
| A_55_P2378 | 14.3 Detected    | 5.9 Not Detect   | 3.3 Not Detect   | 9 Not Detect     | D11Ert80e     | 0.629370629 | 0.23076923 | 1.52542373 | 0.559322  |
| A_55_P2023 | 649 Detected     | 490.6 Detected   | 380.1 Detected   | 408.4 Detected   | Apex2         | 0.629275809 | 0.58567026 | 0.83245006 | 0.7747656 |
| A_51_P1767 | 244.9 Detected   | 126.6 Detected   | 213.2 Detected   | 154.1 Detected   | Limd2         | 0.629236423 | 0.87055941 | 1.21721959 | 1.6840442 |
| A_55_P2114 | 1899 Detected    | 6279.2 Detected  | 505.6 Detected   | 1194.9 Detected  | Greb1         | 0.629225908 | 0.26624539 | 0.19029494 | 0.0805198 |
| A_55_P2342 | 36.4 Detected    | 32.6 Detected    | 25.2 Detected    | 22.9 Not Detect  | 170010111Rik  | 0.629120879 | 0.69230769 | 0.70245399 | 0.7730061 |
| A_55_P2064 | 2607.3 Detected  | 2106.4 Detected  | 1788 Detected    | 1640.3 Detected  | Tmx3          | 0.629118245 | 0.68576689 | 0.77872199 | 0.8488416 |

|            |         |          |         |            |         |            |         |            |               |             |            |            |           |
|------------|---------|----------|---------|------------|---------|------------|---------|------------|---------------|-------------|------------|------------|-----------|
| A_55_P2133 | 15.9    | Detected | 17.1    | Detected   | 26.3    | Detected   | 10      | Not Detect | Cep120        | 0.628930818 | 1.65408805 | 0.58479532 | 1.5380117 |
| A_52_P3123 | 581.8   | Detected | 412.9   | Detected   | 385.2   | Detected   | 365.9   | Detected   | Zfp345        | 0.628910278 | 0.66208319 | 0.88617099 | 0.9329135 |
| A_55_P2180 | 17134.6 | Detected | 9241.4  | Detected   | 12799.9 | Detected   | 10775   | Detected   | Rrbp1         | 0.628884456 | 0.74702065 | 1.16594888 | 1.3850607 |
| A_55_P2201 | 121.5   | Detected | 52.5    | Detected   | 80.2    | Detected   | 76.4    | Detected   | 2310079F09Rik | 0.628806584 | 0.6600823  | 1.4552381  | 1.527619  |
| A_55_P1968 | 451     | Detected | 251.1   | Detected   | 311.2   | Detected   | 283.5   | Detected   | Wipi1         | 0.628603104 | 0.69002217 | 1.12903226 | 1.2393469 |
| A_55_P2085 | 879.1   | Detected | 535.5   | Detected   | 703.3   | Detected   | 552.6   | Detected   | 1700037H04Rik | 0.628597429 | 0.80002275 | 1.03193277 | 1.313352  |
| A_52_P2859 | 1401.7  | Detected | 1002.5  | Detected   | 1083.9  | Detected   | 880.9   | Detected   | Arfgap2       | 0.628451166 | 0.77327531 | 0.87870324 | 1.081197  |
| A_55_P1953 | 15.6    | Detected | 16      | Not Detect | 18.4    | Detected   | 9.8     | Not Detect | Tmem233       | 0.628205128 | 1.17948718 | 0.6125     | 1.15      |
| A_55_P2027 | 314.9   | Detected | 216     | Detected   | 244.5   | Detected   | 197.8   | Detected   | Ssh1          | 0.628135916 | 0.77643696 | 0.91574074 | 1.1319444 |
| A_55_P2094 | 760.7   | Detected | 738.5   | Detected   | 440.7   | Detected   | 477.8   | Detected   | Gm14005       | 0.628105692 | 0.57933482 | 0.64698714 | 0.5967502 |
| A_51_P4685 | 524.3   | Detected | 438.3   | Detected   | 442.2   | Detected   | 329.3   | Detected   | 2810408M09Rik | 0.628075529 | 0.84341026 | 0.75131189 | 1.008898  |
| A_52_P5668 | 28.5    | Detected | 28.6    | Detected   | 32.8    | Detected   | 17.9    | Not Detect | Sla2          | 0.628070175 | 1.15087719 | 0.62587413 | 1.1468531 |
| A_52_P2430 | 86.3    | Detected | 805.6   | Detected   | 3.4     | Not Detect | 54.2    | Detected   | Uchl1         | 0.628041715 | 0.03939745 | 0.06727905 | 0.0042205 |
| A_52_P1041 | 206.4   | Detected | 169.8   | Detected   | 295.6   | Detected   | 129.6   | Detected   | Zfp35         | 0.627906977 | 1.43217054 | 0.76325088 | 1.7408716 |
| A_55_P2329 | 4312.4  | Detected | 4226    | Detected   | 2168.6  | Detected   | 2707.7  | Detected   | Camkk2        | 0.627887023 | 0.50287543 | 0.64072409 | 0.5131566 |
| A_55_P2057 | 1095.6  | Detected | 365     | Detected   | 704.9   | Detected   | 687.8   | Detected   | Zfp937        | 0.627783863 | 0.64339175 | 1.88438356 | 1.9312329 |
| A_55_P2056 | 11398   | Detected | 8775    | Detected   | 8854.2  | Detected   | 7154.3  | Detected   | Tk1           | 0.627680295 | 0.77682049 | 0.81530484 | 1.0090256 |
| A_55_P2044 | 5010.9  | Detected | 4539.7  | Detected   | 4668.6  | Detected   | 3145.2  | Detected   | Hs2st1        | 0.627671676 | 0.93168892 | 0.69282111 | 1.0283939 |
| A_66_P1183 | 14.5    | Detected | 6.6     | Not Detect | 13.3    | Not Detect | 9.1     | Not Detect | Ntrk3         | 0.627586207 | 0.91724138 | 1.37878788 | 2.0151515 |
| A_55_P2133 | 8499.4  | Detected | 5440.1  | Detected   | 7378.6  | Detected   | 5333.2  | Detected   | Nmt2          | 0.627479587 | 0.86813187 | 0.98034963 | 1.3563354 |
| A_55_P2022 | 15.3    | Detected | 8.6     | Not Detect | 19.1    | Detected   | 9.6     | Not Detect | Oxct2b        | 0.62745098  | 1.24836601 | 1.11627907 | 2.2209302 |
| A_51_P5015 | 1558.7  | Detected | 1360.1  | Detected   | 1301.5  | Detected   | 977.8   | Detected   | Uxs1          | 0.627317636 | 0.8349907  | 0.71891773 | 0.9569149 |
| A_55_P2152 | 21843   | Detected | 18848.2 | Detected   | 15731.8 | Detected   | 13697.7 | Detected   | Agpat3        | 0.627097926 | 0.72022158 | 0.72673783 | 0.834658  |
| A_55_P2161 | 2816.8  | Detected | 1953.6  | Detected   | 1669.1  | Detected   | 1766.4  | Detected   | Gm10324       | 0.627094575 | 0.59255183 | 0.9041769  | 0.8543714 |
| A_55_P2129 | 907.4   | Detected | 237.7   | Detected   | 4302.1  | Detected   | 569     | Detected   | Pilra         | 0.627066343 | 4.7411285  | 2.39377366 | 18.098864 |
| A_55_P2041 | 30.3    | Detected | 20      | Detected   | 31      | Detected   | 19      | Not Detect | Nav2          | 0.627062706 | 1.02310231 | 0.95       | 1.55      |
| A_51_P3204 | 2910.5  | Detected | 1858.1  | Detected   | 1795.9  | Detected   | 1824.9  | Detected   | Rock2         | 0.627005669 | 0.61704175 | 0.98213229 | 0.9665249 |
| A_55_P2177 | 15      | Detected | 75.8    | Detected   | 4.6     | Not Detect | 9.4     | Not Detect | Ccdc162       | 0.626666667 | 0.30666667 | 0.12401055 | 0.060686  |
| A_55_P1988 | 323.2   | Detected | 212     | Detected   | 215     | Detected   | 202.5   | Detected   | Ssh1          | 0.62654703  | 0.66522277 | 0.95518868 | 1.0141509 |
| A_66_P1297 | 29137.3 | Detected | 18566.5 | Detected   | 24652.4 | Detected   | 18253.6 | Detected   | Pdia3         | 0.626468479 | 0.84607702 | 0.98314707 | 1.3277893 |
| A_55_P2070 | 17.4    | Detected | 12.7    | Not Detect | 10.7    | Not Detect | 10.9    | Not Detect | Ankrd36       | 0.626436782 | 0.61494253 | 0.85826772 | 0.8425197 |
| A_52_P2466 | 212     | Detected | 114.9   | Detected   | 89.2    | Detected   | 132.8   | Detected   | Fam126a       | 0.626415094 | 0.42075472 | 1.15578764 | 0.7763272 |
| A_51_P3341 | 18.2    | Detected | 65      | Detected   | 3.4     | Not Detect | 11.4    | Not Detect | Dcn           | 0.626373626 | 0.18681319 | 0.17538462 | 0.0523077 |
| A_52_P2404 | 142.9   | Detected | 131.4   | Detected   | 106.3   | Detected   | 89.5    | Detected   | Alms1         | 0.626312106 | 0.74387684 | 0.68112633 | 0.8089802 |
| A_55_P2182 | 9349.8  | Detected | 6351.6  | Detected   | 8057.5  | Detected   | 5855.1  | Detected   | Faf2          | 0.626227299 | 0.86178314 | 0.92183072 | 1.268578  |
| A_51_P4625 | 51.9    | Detected | 33.7    | Detected   | 84.7    | Detected   | 32.5    | Not Detect | Gm10658       | 0.626204239 | 1.63198459 | 0.96439169 | 2.5133531 |
| A_52_P6377 | 47022.8 | Detected | 29299.4 | Detected   | 37180.3 | Detected   | 29443.7 | Detected   | Ubl4          | 0.626157949 | 0.79068665 | 1.00492502 | 1.2689782 |
| A_51_P2665 | 3645.4  | Detected | 2583.9  | Detected   | 1826    | Detected   | 2282.3  | Detected   | Zc2hc1a       | 0.626076699 | 0.50090525 | 0.88327722 | 0.7066837 |
| A_52_P9570 | 99.2    | Detected | 50.1    | Detected   | 79.7    | Detected   | 62.1    | Detected   | Mroh2a        | 0.626008065 | 0.80342742 | 1.23952096 | 1.5908184 |
| A_52_P1503 | 360.1   | Detected | 209.5   | Detected   | 254.1   | Detected   | 225.4   | Detected   | Kif2a         | 0.62593724  | 0.70563732 | 1.07589499 | 1.2128878 |

|            |                   |                  |                  |                  |               |             |            |            |           |
|------------|-------------------|------------------|------------------|------------------|---------------|-------------|------------|------------|-----------|
| A_55_P1993 | 58 Detected       | 58.5 Detected    | 24.5 Detected    | 36.3 Not Detect  | Itpkb         | 0.625862069 | 0.42241379 | 0.62051282 | 0.4188034 |
| A_51_P1481 | 20579.5 Detected  | 12822.8 Detected | 15263.2 Detected | 12879.7 Detected | Rad51         | 0.625850968 | 0.74167011 | 1.00443741 | 1.1903172 |
| A_52_P2151 | 524 Detected      | 2255.2 Detected  | 296.6 Detected   | 327.9 Detected   | Pik3r6        | 0.625763359 | 0.56603053 | 0.1453973  | 0.1315183 |
| A_51_P2358 | 7505 Detected     | 3762.2 Detected  | 5618 Detected    | 4696.1 Detected  | Zfp3611       | 0.625729514 | 0.74856762 | 1.24823242 | 1.4932752 |
| A_55_P1992 | 108446.6 Detected | 80877.8 Detected | 99857.2 Detected | 67840.9 Detected | Mrps26        | 0.625569635 | 0.92079604 | 0.83880744 | 1.2346676 |
| A_51_P1211 | 2235.2 Detected   | 2449.7 Detected  | 1566.8 Detected  | 1398 Detected    | Fam132b       | 0.625447387 | 0.70096636 | 0.57068212 | 0.6395885 |
| A_55_P2119 | 59 Detected       | 25.3 Detected    | 32.2 Detected    | 36.9 Not Detect  | Srrm3         | 0.625423729 | 0.54576271 | 1.45849802 | 1.2727273 |
| A_52_P2889 | 197.1 Detected    | 155.3 Detected   | 129.9 Detected   | 123.2 Detected   | A630007B06Rik | 0.62506342  | 0.65905632 | 0.79330328 | 0.8364456 |
| A_55_P1966 | 39167.6 Detected  | 21550.6 Detected | 43063.7 Detected | 24481.8 Detected | Pdpf          | 0.625052339 | 1.09947252 | 1.13601477 | 1.9982599 |
| A_55_P2065 | 14.4 Detected     | 8.7 Not Detect   | 6 Not Detect     | 9 Not Detect     | Sstr2         | 0.625       | 0.41666667 | 1.03448276 | 0.6896552 |
| A_55_P1977 | 13.6 Detected     | 9.8 Not Detect   | 3.8 Not Detect   | 8.5 Not Detect   | Cxcl9         | 0.625       | 0.27941176 | 0.86734694 | 0.3877551 |
| A_52_P6642 | 85 Detected       | 63.3 Detected    | 63.4 Detected    | 53.1 Detected    | Zfp560        | 0.624705882 | 0.74588235 | 0.83886256 | 1.0015798 |
| A_55_P1993 | 1588.8 Detected   | 2498.6 Detected  | 882.3 Detected   | 992.5 Detected   | Lrp12         | 0.624685297 | 0.55532477 | 0.39722244 | 0.3531177 |
| A_55_P2069 | 30097 Detected    | 12902 Detected   | 19827 Detected   | 18801.1 Detected | Trim44        | 0.624683523 | 0.65876998 | 1.45722369 | 1.5367385 |
| A_51_P4543 | 312.2 Detected    | 214.8 Detected   | 194.4 Detected   | 194.9 Detected   | Zfp772        | 0.624279308 | 0.62267777 | 0.90735568 | 0.9050279 |
| A_51_P1642 | 1082.9 Detected   | 1547.7 Detected  | 908.8 Detected   | 676 Detected     | Nme4          | 0.6242497   | 0.839228   | 0.43677715 | 0.5871939 |
| A_52_P2436 | 16.5 Detected     | 7 Not Detect     | 7.6 Not Detect   | 10.3 Not Detect  | Lrriq3        | 0.624242424 | 0.46060606 | 1.47142857 | 1.0857143 |
| A_65_P0657 | 561 Detected      | 459.7 Detected   | 384.8 Detected   | 350.2 Detected   | Smad5         | 0.624242424 | 0.685918   | 0.76180117 | 0.8370677 |
| A_52_P2095 | 76.9 Detected     | 100.7 Detected   | 51.3 Detected    | 48 Not Detect    | Cacnb2        | 0.624187256 | 0.66710013 | 0.47666336 | 0.509434  |
| A_55_P1977 | 98.7 Detected     | 71.7 Detected    | 68.7 Detected    | 61.6 Detected    | Cdc7          | 0.624113475 | 0.69604863 | 0.85913529 | 0.958159  |
| A_55_P1985 | 482.1 Detected    | 402.3 Detected   | 373.4 Detected   | 300.8 Detected   | Thumpd2       | 0.623936943 | 0.77452811 | 0.74770072 | 0.9281631 |
| A_51_P4337 | 104.5 Detected    | 80.1 Detected    | 79.4 Detected    | 65.2 Detected    | Tert          | 0.623923445 | 0.75980861 | 0.81398252 | 0.9912609 |
| A_51_P4384 | 7225.1 Detected   | 4352.1 Detected  | 5253.1 Detected  | 4507.8 Detected  | Zfp281        | 0.62390832  | 0.7270626  | 1.03577583 | 1.2070265 |
| A_55_P2004 | 297 Detected      | 235.7 Detected   | 228.4 Detected   | 185.3 Detected   | Btrc          | 0.623905724 | 0.76902357 | 0.78616886 | 0.9690284 |
| A_55_P2466 | 166.6 Detected    | 109.9 Detected   | 133.1 Detected   | 103.9 Detected   | Ttc21b        | 0.62364946  | 0.79891957 | 0.94540491 | 1.211101  |
| A_55_P2115 | 178.8 Detected    | 91.1 Detected    | 104.9 Detected   | 111.5 Detected   | Zfp808        | 0.62360179  | 0.58668904 | 1.22392975 | 1.1514819 |
| A_55_P2032 | 194.7 Detected    | 177.1 Detected   | 135.8 Detected   | 121.4 Detected   | Slc25a37      | 0.623523369 | 0.69748331 | 0.68548842 | 0.7667984 |
| A_51_P2835 | 311.8 Detected    | 209.3 Detected   | 267.6 Detected   | 194.4 Detected   | Zbtb26        | 0.623476588 | 0.85824246 | 0.92881032 | 1.2785475 |
| A_55_P2141 | 32.4 Detected     | 25.6 Detected    | 24.2 Detected    | 20.2 Not Detect  | 4930577H14Rik | 0.62345679  | 0.74691358 | 0.7890625  | 0.9453125 |
| A_55_P2159 | 13348.9 Detected  | 9928 Detected    | 10367.2 Detected | 8320 Detected    | Acvr1         | 0.62327233  | 0.77663328 | 0.83803384 | 1.0442385 |
| A_55_P2382 | 41.4 Detected     | 26 Detected      | 30.1 Detected    | 25.8 Not Detect  | 4933435E02Rik | 0.623188406 | 0.72705314 | 0.99230769 | 1.1576923 |
| A_52_P1970 | 708 Detected      | 721 Detected     | 377.3 Detected   | 441.2 Detected   | Cdk17         | 0.623163842 | 0.5329096  | 0.61192788 | 0.523301  |
| A_51_P4900 | 55918.7 Detected  | 25758.7 Detected | 26605.8 Detected | 34835 Detected   | Tubb2a        | 0.622957973 | 0.47579432 | 1.35235862 | 1.032886  |
| A_55_P2346 | 24.4 Detected     | 20.1 Detected    | 20.9 Detected    | 15.2 Not Detect  | A430105D02Rik | 0.62295082  | 0.85655738 | 0.75621891 | 1.039801  |
| A_55_P1973 | 17.5 Detected     | 26.8 Detected    | 82.2 Detected    | 10.9 Not Detect  | Gm2959        | 0.622857143 | 4.69714286 | 0.40671642 | 3.0671642 |
| A_55_P1958 | 40.3 Detected     | 54.9 Detected    | 26.3 Detected    | 25.1 Not Detect  | Slit2         | 0.622828784 | 0.65260546 | 0.4571949  | 0.4790528 |
| A_65_P1928 | 5772.6 Detected   | 6391.1 Detected  | 5856.2 Detected  | 3593.6 Detected  | Alg10b        | 0.622527111 | 1.01448221 | 0.56228192 | 0.9163055 |
| A_55_P2129 | 576.5 Detected    | 410.6 Detected   | 462.1 Detected   | 358.8 Detected   | Pkig          | 0.622376409 | 0.80156114 | 0.87384316 | 1.1254262 |
| A_55_P1984 | 70.4 Detected     | 64.6 Detected    | 41.3 Detected    | 43.8 Not Detect  | Zbtb1         | 0.622159091 | 0.58664773 | 0.67801858 | 0.6393189 |
| A_55_P1970 | 3663.6 Detected   | 3117.3 Detected  | 3098.7 Detected  | 2279.2 Detected  | B3gnt2        | 0.622120319 | 0.8458074  | 0.73114554 | 0.9940333 |

|            |         |          |         |            |         |            |         |            |               |             |            |            |           |
|------------|---------|----------|---------|------------|---------|------------|---------|------------|---------------|-------------|------------|------------|-----------|
| A_52_P4518 | 3284.1  | Detected | 1885.3  | Detected   | 1961.9  | Detected   | 2042.7  | Detected   | Stk35         | 0.621996894 | 0.5973935  | 1.08348804 | 1.0406301 |
| A_51_P3456 | 21552.9 | Detected | 12319.5 | Detected   | 14595.7 | Detected   | 13403.8 | Detected   | Rrbp1         | 0.621902389 | 0.67720353 | 1.08801494 | 1.184764  |
| A_55_P1958 | 41.5    | Detected | 27.2    | Detected   | 33.1    | Detected   | 25.8    | Not Detect | Gm3081        | 0.621686747 | 0.79759036 | 0.94852941 | 1.2169118 |
| A_55_P1983 | 218.5   | Detected | 414.9   | Detected   | 92.3    | Detected   | 135.8   | Detected   | Aldh11l1      | 0.621510297 | 0.42242563 | 0.32730779 | 0.2224632 |
| A_52_P1085 | 253.6   | Detected | 199.9   | Detected   | 144.7   | Detected   | 157.6   | Detected   | Slc4a7        | 0.621451104 | 0.5705836  | 0.7883942  | 0.7238619 |
| A_55_P2183 | 16.1    | Detected | 13.9    | Not Detect | 3.7     | Not Detect | 10      | Not Detect | Ptn           | 0.621118012 | 0.22981366 | 0.71942446 | 0.2661871 |
| A_55_P2356 | 16.1    | Detected | 24.8    | Detected   | 9.3     | Not Detect | 10      | Not Detect | Anks1b        | 0.621118012 | 0.57763975 | 0.40322581 | 0.375     |
| A_55_P1973 | 34.3    | Detected | 26      | Detected   | 15.2    | Not Detect | 21.3    | Not Detect | Cldn17        | 0.620991254 | 0.44314869 | 0.81923077 | 0.5846154 |
| A_55_P2171 | 1722.8  | Detected | 1149.8  | Detected   | 1581    | Detected   | 1069.7  | Detected   | Mrgbp         | 0.620907824 | 0.91769213 | 0.93033571 | 1.3750217 |
| A_51_P3862 | 366.8   | Detected | 338.5   | Detected   | 295.7   | Detected   | 227.7   | Detected   | Olf187        | 0.620774264 | 0.8061614  | 0.67267356 | 0.8735598 |
| A_51_P2412 | 143.7   | Detected | 63.3    | Detected   | 82.9    | Detected   | 89.2    | Detected   | A030005L19Rik | 0.620737648 | 0.57689631 | 1.40916272 | 1.3096367 |
| A_55_P2178 | 2163.1  | Detected | 1381.5  | Detected   | 1888.9  | Detected   | 1342.7  | Detected   | Fam20b        | 0.620729509 | 0.87323748 | 0.97191459 | 1.3672819 |
| A_52_P6833 | 1347.3  | Detected | 1031.7  | Detected   | 1040.3  | Detected   | 836.3   | Detected   | Fam13b        | 0.620722927 | 0.77213687 | 0.81060386 | 1.0083358 |
| A_55_P2046 | 17.4    | Detected | 16.4    | Not Detect | 12      | Not Detect | 10.8    | Not Detect | Mmp27         | 0.620689655 | 0.68965517 | 0.65853659 | 0.7317073 |
| A_51_P4129 | 17.4    | Detected | 24.7    | Detected   | 8.3     | Not Detect | 10.8    | Not Detect | Krt27         | 0.620689655 | 0.47701149 | 0.43724696 | 0.3360324 |
| A_55_P1974 | 8806.4  | Detected | 3624    | Detected   | 9120.1  | Detected   | 5465.5  | Detected   | Rbmx          | 0.62062818  | 1.03562182 | 1.50814018 | 2.5165839 |
| A_55_P2003 | 158.6   | Detected | 94.1    | Detected   | 133     | Detected   | 98.4    | Detected   | Bfsp1         | 0.620428752 | 0.83858764 | 1.04569607 | 1.41339   |
| A_55_P2031 | 26.6    | Detected | 14.5    | Not Detect | 12.6    | Not Detect | 16.5    | Not Detect | Olf1345       | 0.620300752 | 0.47368421 | 1.13793103 | 0.8689655 |
| A_55_P1990 | 398.8   | Detected | 304.4   | Detected   | 231     | Detected   | 247.2   | Detected   | Plscr3        | 0.619859579 | 0.57923771 | 0.81208936 | 0.7588699 |
| A_55_P2071 | 8422.4  | Detected | 6774.5  | Detected   | 7931.8  | Detected   | 5220.5  | Detected   | Asap1         | 0.619835201 | 0.94175057 | 0.77061038 | 1.1708318 |
| A_55_P1981 | 10393.9 | Detected | 6462.6  | Detected   | 7484.2  | Detected   | 6441.7  | Detected   | Cul4b         | 0.619757743 | 0.72005696 | 0.99676601 | 1.1580788 |
| A_52_P1609 | 6641.9  | Detected | 6261.9  | Detected   | 6101.3  | Detected   | 4115.8  | Detected   | Gusb          | 0.619672082 | 0.91860763 | 0.65727655 | 0.9743528 |
| A_55_P2011 | 23.4    | Detected | 12.9    | Not Detect | 21.7    | Detected   | 14.5    | Not Detect | Tenm2         | 0.61965812  | 0.92735043 | 1.12403101 | 1.6821705 |
| A_51_P2187 | 20629.8 | Detected | 10014.3 | Detected   | 11832.7 | Detected   | 12778.3 | Detected   | Rgs10         | 0.619409786 | 0.57357318 | 1.27600531 | 1.1815803 |
| A_55_P2042 | 900.1   | Detected | 952.5   | Detected   | 341.4   | Detected   | 557.4   | Detected   | Dpysl3        | 0.619264526 | 0.37929119 | 0.58519685 | 0.3584252 |
| A_55_P2093 | 261.3   | Detected | 178.8   | Detected   | 266.3   | Detected   | 161.7   | Detected   | Zfp458        | 0.618828932 | 1.01913509 | 0.90436242 | 1.4893736 |
| A_66_P1059 | 123.3   | Detected | 66.2    | Detected   | 82      | Detected   | 76.3    | Detected   | Drp2          | 0.618815896 | 0.66504461 | 1.15256798 | 1.2386707 |
| A_52_P2154 | 984.7   | Detected | 747     | Detected   | 736.9   | Detected   | 609.2   | Detected   | Armc9         | 0.618665583 | 0.74834975 | 0.81552878 | 0.9864793 |
| A_55_P2059 | 3480.4  | Detected | 2119.4  | Detected   | 3358.1  | Detected   | 2153    | Detected   | Zfp943        | 0.618607057 | 0.96486036 | 1.01585354 | 1.5844579 |
| A_55_P2025 | 137.1   | Detected | 115.9   | Detected   | 132.8   | Detected   | 84.8    | Detected   | Rps27a        | 0.618526623 | 0.96863603 | 0.73166523 | 1.1458154 |
| A_55_P1976 | 6598.7  | Detected | 6936.9  | Detected   | 3487.9  | Detected   | 4079.5  | Detected   | Lman2l        | 0.618227833 | 0.52857381 | 0.5880869  | 0.5028038 |
| A_55_P2036 | 16.5    | Detected | 14.2    | Not Detect | 15.1    | Not Detect | 10.2    | Not Detect | AV320801      | 0.618181818 | 0.91515152 | 0.71830986 | 1.0633803 |
| A_52_P6241 | 751.4   | Detected | 575.5   | Detected   | 549.5   | Detected   | 464.5   | Detected   | Gm5039        | 0.618179398 | 0.73130157 | 0.80712424 | 0.9548219 |
| A_55_P1957 | 74.9    | Detected | 82.8    | Detected   | 18.3    | Detected   | 46.3    | Detected   | Gareml        | 0.618157543 | 0.24432577 | 0.55917874 | 0.2210145 |
| A_66_P1183 | 349.3   | Detected | 211.8   | Detected   | 263.8   | Detected   | 215.9   | Detected   | 1700047G07Rik | 0.61809333  | 0.75522474 | 1.01935788 | 1.2455146 |
| A_55_P1982 | 58.6    | Detected | 40.9    | Detected   | 34.8    | Detected   | 36.2    | Not Detect | Kdm4a         | 0.61774744  | 0.59385666 | 0.88508557 | 0.8508557 |
| A_66_P1177 | 30.6    | Detected | 14.8    | Not Detect | 17.5    | Not Detect | 18.9    | Not Detect | Lipo4         | 0.617647059 | 0.57189542 | 1.27702703 | 1.1824324 |
| A_52_P4803 | 43276.3 | Detected | 21090.6 | Detected   | 25135   | Detected   | 26723   | Detected   | Dut           | 0.617497337 | 0.58080289 | 1.26705736 | 1.1917632 |
| A_55_P1975 | 14.9    | Detected | 12.1    | Not Detect | 9.2     | Not Detect | 9.2     | Not Detect | Rhox4g        | 0.617449664 | 0.61744966 | 0.76033058 | 0.7603306 |
| A_52_P1055 | 178     | Detected | 184.7   | Detected   | 144.2   | Detected   | 109.9   | Detected   | Asah2         | 0.61741573  | 0.81011236 | 0.59501895 | 0.7807255 |

|            |         |          |         |            |         |            |         |            |               |             |            |            |           |
|------------|---------|----------|---------|------------|---------|------------|---------|------------|---------------|-------------|------------|------------|-----------|
| A_51_P1855 | 374.7   | Detected | 203.8   | Detected   | 260.5   | Detected   | 231.3   | Detected   | Zfp935        | 0.617293835 | 0.69522284 | 1.13493621 | 1.2782139 |
| A_55_P2016 | 9719.2  | Detected | 5232.5  | Detected   | 9843.7  | Detected   | 5998.9  | Detected   | Alkbh7        | 0.617221582 | 1.0128097  | 1.14646918 | 1.8812613 |
| A_55_P2116 | 243.7   | Detected | 129.5   | Detected   | 175.2   | Detected   | 150.4   | Detected   | Xirp1         | 0.617152236 | 0.7189167  | 1.16138996 | 1.3528958 |
| A_65_P1931 | 4264    | Detected | 2266.4  | Detected   | 220.8   | Detected   | 2629.7  | Detected   | Soga1         | 0.616721388 | 0.05178236 | 1.16029827 | 0.0974232 |
| A_66_P1196 | 739.9   | Detected | 596.7   | Detected   | 579.3   | Detected   | 456.3   | Detected   | Smc5          | 0.61670496  | 0.78294364 | 0.76470588 | 0.9708396 |
| A_55_P2147 | 36819.3 | Detected | 26396.7 | Detected   | 34677.2 | Detected   | 22702   | Detected   | Cstf1         | 0.616578805 | 0.94182127 | 0.86003175 | 1.3136945 |
| A_52_P2847 | 16594.3 | Detected | 11742.1 | Detected   | 12842.2 | Detected   | 10230.5 | Detected   | Rae1          | 0.616506873 | 0.77389224 | 0.87126664 | 1.0936885 |
| A_51_P3741 | 120.7   | Detected | 82.9    | Detected   | 97.4    | Detected   | 74.4    | Detected   | Pard6b        | 0.616404308 | 0.8069594  | 0.89746683 | 1.1749095 |
| A_52_P1442 | 5631.5  | Detected | 3290.8  | Detected   | 3882.7  | Detected   | 3471.1  | Detected   | Rbms1         | 0.616372192 | 0.68946107 | 1.05478911 | 1.1798651 |
| A_55_P2282 | 15.9    | Detected | 3.6     | Not Detect | 70.2    | Detected   | 9.8     | Not Detect | 4930484H19Rik | 0.616352201 | 4.41509434 | 2.72222222 | 19.5      |
| A_55_P2121 | 17.2    | Detected | 7.8     | Not Detect | 6.5     | Not Detect | 10.6    | Not Detect | Tomt          | 0.61627907  | 0.37790698 | 1.35897436 | 0.8333333 |
| A_52_P5263 | 60.2    | Detected | 47.2    | Detected   | 5.8     | Not Detect | 37.1    | Not Detect | Zeb2          | 0.61627907  | 0.09634551 | 0.78601695 | 0.1228814 |
| A_55_P2180 | 103.7   | Detected | 82.3    | Detected   | 93.9    | Detected   | 63.9    | Detected   | Zfp740        | 0.616200579 | 0.90549662 | 0.7764277  | 1.1409478 |
| A_51_P1268 | 3158.3  | Detected | 1782.6  | Detected   | 2069.9  | Detected   | 1946    | Detected   | Arl14ep       | 0.61615426  | 0.65538423 | 1.09166386 | 1.1611691 |
| A_51_P2399 | 11677.9 | Detected | 10742   | Detected   | 10295.9 | Detected   | 7194.9  | Detected   | Exo1          | 0.616112486 | 0.8816568  | 0.66979147 | 0.9584714 |
| A_55_P1952 | 5814.3  | Detected | 2993.8  | Detected   | 3021.7  | Detected   | 3582.2  | Detected   | Spry1         | 0.61610168  | 0.51970143 | 1.19653951 | 1.0093193 |
| A_55_P2069 | 1813.9  | Detected | 965.1   | Detected   | 1411.2  | Detected   | 1117.4  | Detected   | D5Erd579e     | 0.616020729 | 0.77799217 | 1.15780748 | 1.4622319 |
| A_55_P2022 | 47.9    | Detected | 28.7    | Detected   | 34.7    | Detected   | 29.5    | Not Detect | Arvcf         | 0.615866388 | 0.72442589 | 1.02787456 | 1.2090592 |
| A_55_P2057 | 3073.4  | Detected | 2044    | Detected   | 2815.4  | Detected   | 1891.9  | Detected   | Ppm1b         | 0.61557233  | 0.91605388 | 0.92558708 | 1.3773973 |
| A_55_P2056 | 42.4    | Detected | 29.6    | Detected   | 39.7    | Detected   | 26.1    | Not Detect | Fpr3          | 0.615566038 | 0.93632075 | 0.88175676 | 1.3412162 |
| A_55_P2047 | 38.2    | Detected | 47.5    | Detected   | 15      | Not Detect | 23.5    | Not Detect | Cubn          | 0.615183246 | 0.39267016 | 0.49473684 | 0.3157895 |
| A_55_P1964 | 25846   | Detected | 9401.8  | Detected   | 16219.9 | Detected   | 15899   | Detected   | Cxadr         | 0.615143543 | 0.62755939 | 1.69105916 | 1.7251909 |
| A_55_P2010 | 9486.2  | Detected | 8177.8  | Detected   | 8297    | Detected   | 5834.1  | Detected   | Fastkd5       | 0.615009171 | 0.87463895 | 0.71340703 | 1.014576  |
| A_51_P1466 | 14260.7 | Detected | 11490.7 | Detected   | 8813.7  | Detected   | 8769    | Detected   | Bicc1         | 0.614906702 | 0.61804119 | 0.76313889 | 0.767029  |
| A_55_P2129 | 357.8   | Detected | 91      | Detected   | 1944.3  | Detected   | 220     | Detected   | Pilra         | 0.614868642 | 5.43404136 | 2.41758242 | 21.365934 |
| A_55_P2143 | 14      | Detected | 17.1    | Detected   | 15.6    | Detected   | 8.6     | Not Detect | AU015228      | 0.614285714 | 1.11428571 | 0.50292398 | 0.9122807 |
| A_51_P4345 | 4606.4  | Detected | 3283.2  | Detected   | 2865    | Detected   | 2829.5  | Detected   | Dtwd1         | 0.614254081 | 0.62196075 | 0.86181165 | 0.8726243 |
| A_55_P2220 | 46.9    | Detected | 32.9    | Detected   | 29.6    | Detected   | 28.8    | Not Detect | C230094B09Rik | 0.614072495 | 0.63113006 | 0.87537994 | 0.899696  |
| A_52_P2682 | 3228    | Detected | 1902.2  | Detected   | 2658    | Detected   | 1981.9  | Detected   | Fbxl17        | 0.613971499 | 0.82342007 | 1.04189885 | 1.3973294 |
| A_55_P2015 | 41.7    | Detected | 41.1    | Detected   | 26.7    | Detected   | 25.6    | Not Detect | Efcab7        | 0.613908873 | 0.64028777 | 0.62287105 | 0.649635  |
| A_52_P4970 | 69.4    | Detected | 45.3    | Detected   | 44.4    | Detected   | 42.6    | Not Detect | Spred3        | 0.613832853 | 0.63976945 | 0.94039735 | 0.9801325 |
| A_55_P2098 | 14.5    | Detected | 12.2    | Not Detect | 6.6     | Not Detect | 8.9     | Not Detect | Trim30c       | 0.613793103 | 0.45517241 | 0.7295082  | 0.5409836 |
| A_55_P1978 | 5309.2  | Detected | 4894.1  | Detected   | 4751.6  | Detected   | 3258    | Detected   | Park2         | 0.613651774 | 0.89497476 | 0.66569952 | 0.9708833 |
| A_55_P2173 | 2292    | Detected | 1499.2  | Detected   | 1583.9  | Detected   | 1406.2  | Detected   | Kif2a         | 0.613525305 | 0.69105585 | 0.93796692 | 1.0564968 |
| A_51_P1005 | 1740.7  | Detected | 1059.4  | Detected   | 1192.7  | Detected   | 1067.5  | Detected   | Map3k3        | 0.613259034 | 0.68518412 | 1.00764584 | 1.1258259 |
| A_55_P2051 | 2447.4  | Detected | 2423.1  | Detected   | 2293.7  | Detected   | 1500.8  | Detected   | Pvt1          | 0.613222195 | 0.93719866 | 0.61937188 | 0.9465973 |
| A_52_P4875 | 324.7   | Detected | 738.7   | Detected   | 587.6   | Detected   | 199.1   | Detected   | Thnsl2        | 0.613181398 | 1.80967047 | 0.26952755 | 0.7954515 |
| A_55_P1972 | 285.4   | Detected | 190.5   | Detected   | 227.6   | Detected   | 175     | Detected   | Zfp944        | 0.613174492 | 0.79747722 | 0.91863517 | 1.1947507 |
| A_55_P2096 | 1362.3  | Detected | 1058.9  | Detected   | 1110.3  | Detected   | 835.3   | Detected   | Cdc42bpa      | 0.613154224 | 0.81501872 | 0.78883747 | 1.0485409 |
| A_55_P1974 | 3973.8  | Detected | 2702.5  | Detected   | 2426.8  | Detected   | 2436.1  | Detected   | Lime1         | 0.613040415 | 0.61070009 | 0.90142461 | 0.8979833 |

|            |         |          |         |            |         |            |         |            |               |             |            |            |           |
|------------|---------|----------|---------|------------|---------|------------|---------|------------|---------------|-------------|------------|------------|-----------|
| A_55_P2028 | 107.5   | Detected | 110.8   | Detected   | 32.6    | Detected   | 65.9    | Detected   | Pik3cd        | 0.613023256 | 0.30325581 | 0.59476534 | 0.2942238 |
| A_51_P2216 | 39348.2 | Detected | 23277.1 | Detected   | 31105.5 | Detected   | 24120.8 | Detected   | 1700037H04Rik | 0.613008981 | 0.79051901 | 1.03624592 | 1.3363134 |
| A_55_P2042 | 1102.3  | Detected | 1524.3  | Detected   | 748.5   | Detected   | 675.2   | Detected   | Sh3bp2        | 0.612537422 | 0.67903475 | 0.44295742 | 0.4910451 |
| A_51_P1024 | 14.7    | Detected | 15.4    | Not Detect | 22.5    | Detected   | 9       | Not Detect | Jph3          | 0.612244898 | 1.53061224 | 0.58441558 | 1.461039  |
| A_55_P2115 | 4067.7  | Detected | 2723.3  | Detected   | 3442.1  | Detected   | 2489.7  | Detected   | Pdhx          | 0.612065787 | 0.84620301 | 0.91422172 | 1.2639445 |
| A_55_P2182 | 34.5    | Detected | 46.4    | Detected   | 32.9    | Detected   | 21.1    | Not Detect | AF067061      | 0.611594203 | 0.95362319 | 0.45474138 | 0.7090517 |
| A_55_P2303 | 13.9    | Detected | 9.2     | Not Detect | 9.5     | Not Detect | 8.5     | Not Detect | 2810471M01Rik | 0.611510791 | 0.68345324 | 0.92391304 | 1.0326087 |
| A_55_P2058 | 17940.7 | Detected | 10206.7 | Detected   | 12098.4 | Detected   | 10968.9 | Detected   | Hnrnpa3       | 0.611397549 | 0.67435496 | 1.07467644 | 1.185339  |
| A_52_P3633 | 16.2    | Detected | 3.5     | Not Detect | 11      | Not Detect | 9.9     | Not Detect | Ccdc110       | 0.611111111 | 0.67901235 | 2.82857143 | 3.1428571 |
| A_51_P2915 | 16.2    | Detected | 22.5    | Detected   | 22.4    | Detected   | 9.9     | Not Detect | Ccno          | 0.611111111 | 1.38271605 | 0.44       | 0.9955556 |
| A_51_P1016 | 40601.6 | Detected | 23686.5 | Detected   | 36043.6 | Detected   | 24806   | Detected   | Stub1         | 0.610961144 | 0.88773841 | 1.04726321 | 1.5216938 |
| A_55_P2127 | 210.5   | Detected | 145.2   | Detected   | 116.4   | Detected   | 128.6   | Detected   | Tpsb2         | 0.610926366 | 0.55296912 | 0.88567493 | 0.8016529 |
| A_52_P3176 | 221.8   | Detected | 152.9   | Detected   | 177.9   | Detected   | 135.5   | Detected   | Car1          | 0.61091073  | 0.80207394 | 0.88620013 | 1.1635056 |
| A_55_P2279 | 108.6   | Detected | 97.9    | Detected   | 53.6    | Detected   | 66.3    | Detected   | F830014O18Rik | 0.610497238 | 0.49355433 | 0.67722165 | 0.5474974 |
| A_52_P3692 | 878.5   | Detected | 694.5   | Detected   | 687.3   | Detected   | 536.3   | Detected   | Morn2         | 0.610472396 | 0.78235629 | 0.77221022 | 0.9896328 |
| A_55_P2219 | 15.4    | Detected | 15.8    | Not Detect | 13.7    | Not Detect | 9.4     | Not Detect | D3Erd711e     | 0.61038961  | 0.88961039 | 0.59493671 | 0.8670886 |
| A_55_P1980 | 36987.8 | Detected | 25600   | Detected   | 30717   | Detected   | 22576.1 | Detected   | Ube2i         | 0.610366121 | 0.83046302 | 0.88187891 | 1.1998828 |
| A_65_P0428 | 197.1   | Detected | 114.7   | Detected   | 122     | Detected   | 120.3   | Detected   | Erap1         | 0.610350076 | 0.61897514 | 1.04882302 | 1.0636443 |
| A_51_P1890 | 19.5    | Detected | 21.8    | Detected   | 30.7    | Detected   | 11.9    | Not Detect | Akr1c6        | 0.61025641  | 1.57435897 | 0.54587156 | 1.4082569 |
| A_55_P2004 | 480.5   | Detected | 323.1   | Detected   | 432.8   | Detected   | 293.2   | Detected   | Csrp2bp       | 0.610197711 | 0.90072841 | 0.90745899 | 1.3395234 |
| A_55_P2150 | 17.7    | Detected | 10.1    | Not Detect | 8.5     | Not Detect | 10.8    | Not Detect | Ccdc85c       | 0.610169492 | 0.48022599 | 1.06930693 | 0.8415842 |
| A_66_P1393 | 96.4    | Detected | 64.8    | Detected   | 70.4    | Detected   | 58.8    | Detected   | Trp53bp1      | 0.609958506 | 0.73029046 | 0.90740741 | 1.0864198 |
| A_51_P4055 | 36342.5 | Detected | 26320.4 | Detected   | 26741.7 | Detected   | 22163.5 | Detected   | Msh6          | 0.609850726 | 0.73582445 | 0.84206547 | 1.0160066 |
| A_55_P2157 | 37.4    | Detected | 41.9    | Detected   | 44.3    | Detected   | 22.8    | Not Detect | Mlt3          | 0.609625668 | 1.18449198 | 0.54415274 | 1.0572792 |
| A_51_P2963 | 1209    | Detected | 949.2   | Detected   | 1055.8  | Detected   | 736.7   | Detected   | Ahcy11        | 0.609346567 | 0.87328371 | 0.77612727 | 1.1123051 |
| A_51_P2658 | 538.8   | Detected | 178.7   | Detected   | 371.4   | Detected   | 328.3   | Detected   | Clca2         | 0.609317001 | 0.68930958 | 1.83715725 | 2.0783436 |
| A_55_P2317 | 15.1    | Detected | 3.2     | Not Detect | 3.2     | Not Detect | 9.2     | Not Detect | C230021G24Rik | 0.609271523 | 0.21192053 | 2.875      | 1         |
| A_51_P1486 | 62.7    | Detected | 46.8    | Detected   | 38.5    | Detected   | 38.2    | Not Detect | Pou6f2        | 0.609250399 | 0.61403509 | 0.81623932 | 0.8226496 |
| A_55_P2009 | 26.6    | Detected | 20.2    | Detected   | 24.8    | Detected   | 16.2    | Not Detect | Gm5751        | 0.609022556 | 0.93233083 | 0.8019802  | 1.2277228 |
| A_55_P2174 | 1250.3  | Detected | 998.8   | Detected   | 120.8   | Detected   | 761.3   | Detected   | Sprr1b        | 0.608893865 | 0.09661681 | 0.76221466 | 0.1209451 |
| A_55_P2293 | 5919    | Detected | 3157.2  | Detected   | 6338.6  | Detected   | 3603.7  | Detected   | Cldn18        | 0.608835952 | 1.07089035 | 1.14142278 | 2.007665  |
| A_55_P1969 | 1063.9  | Detected | 566.9   | Detected   | 815.1   | Detected   | 647.7   | Detected   | Zfp758        | 0.608797819 | 0.76614343 | 1.14252955 | 1.4378197 |
| A_55_P2116 | 198     | Detected | 126.4   | Detected   | 118.6   | Detected   | 120.5   | Detected   | Tnpo1         | 0.608585859 | 0.5989899  | 0.95332278 | 0.9382911 |
| A_55_P2001 | 2942.8  | Detected | 1865    | Detected   | 2718.8  | Detected   | 1790.8  | Detected   | Cacul1        | 0.608536088 | 0.92388202 | 0.96021448 | 1.4578016 |
| A_55_P1991 | 16.6    | Detected | 15      | Not Detect | 21.7    | Detected   | 10.1    | Not Detect | Scarletltr    | 0.608433735 | 1.30722892 | 0.67333333 | 1.4466667 |
| A_55_P2294 | 14.3    | Detected | 3.4     | Not Detect | 10.1    | Not Detect | 8.7     | Not Detect | Tanc2         | 0.608391608 | 0.70629371 | 2.55882353 | 2.9705882 |
| A_51_P4093 | 100.6   | Detected | 65.1    | Detected   | 18.6    | Detected   | 61.2    | Detected   | Trim29        | 0.608349901 | 0.18489066 | 0.94009217 | 0.2857143 |
| A_52_P2148 | 33.7    | Detected | 28.6    | Detected   | 23.5    | Detected   | 20.5    | Not Detect | Hamp2         | 0.608308605 | 0.69732938 | 0.71678322 | 0.8216783 |
| A_51_P4135 | 14.8    | Detected | 5.5     | Not Detect | 3.2     | Not Detect | 9       | Not Detect | Ranbp17       | 0.608108108 | 0.21621622 | 1.63636364 | 0.5818182 |
| A_55_P1987 | 14.8    | Detected | 7.6     | Not Detect | 15.6    | Not Detect | 9       | Not Detect | Prl3a1        | 0.608108108 | 1.05405405 | 1.18421053 | 2.0526316 |

|            |         |          |         |            |         |            |         |            |               |             |            |            |           |
|------------|---------|----------|---------|------------|---------|------------|---------|------------|---------------|-------------|------------|------------|-----------|
| A_55_P2047 | 30.6    | Detected | 73.5    | Detected   | 14.6    | Not Detect | 18.6    | Not Detect | Chst13        | 0.607843137 | 0.47712418 | 0.25306122 | 0.1986395 |
| A_55_P1996 | 23132.5 | Detected | 20953.2 | Detected   | 23003.8 | Detected   | 14060.3 | Detected   | D030056L22Rik | 0.607815844 | 0.9944364  | 0.67103354 | 1.0978657 |
| A_55_P2367 | 326.9   | Detected | 175.9   | Detected   | 169.1   | Detected   | 198.6   | Detected   | Spaca6        | 0.607525237 | 0.51728357 | 1.1290506  | 0.9613417 |
| A_66_P1229 | 70.3    | Detected | 45.4    | Detected   | 39.5    | Detected   | 42.7    | Detected   | Mbd5          | 0.607396871 | 0.56187767 | 0.94052863 | 0.8700441 |
| A_52_P5278 | 146.2   | Detected | 296.7   | Detected   | 110     | Detected   | 88.8    | Detected   | Emilin2       | 0.607387141 | 0.75239398 | 0.29929221 | 0.3707449 |
| A_51_P3383 | 6613.3  | Detected | 2677.2  | Detected   | 2912    | Detected   | 4016.5  | Detected   | Rhoq          | 0.607336731 | 0.4403248  | 1.50026147 | 1.0877036 |
| A_51_P4386 | 28      | Detected | 27.7    | Detected   | 8.7     | Not Detect | 17      | Not Detect | Sobp          | 0.607142857 | 0.31071429 | 0.61371841 | 0.3140794 |
| A_55_P2138 | 14      | Detected | 21.5    | Detected   | 23.2    | Detected   | 8.5     | Not Detect | Gm17769       | 0.607142857 | 1.65714286 | 0.39534884 | 1.0790698 |
| A_55_P2117 | 46.3    | Detected | 19.1    | Detected   | 45.1    | Detected   | 28.1    | Not Detect | Azi2          | 0.606911447 | 0.97408207 | 1.47120419 | 2.3612565 |
| A_55_P1958 | 16202.7 | Detected | 8496.9  | Detected   | 18670.3 | Detected   | 9830.4  | Detected   | Nek6          | 0.606713696 | 1.15229561 | 1.15693959 | 2.1973073 |
| A_66_P1251 | 88.2    | Detected | 85.3    | Detected   | 36.2    | Detected   | 53.5    | Not Detect | 1700057H15Rik | 0.606575964 | 0.41043084 | 0.62719812 | 0.4243845 |
| A_55_P2367 | 24.4    | Detected | 22.3    | Detected   | 22.6    | Detected   | 14.8    | Not Detect | 4833421G17Rik | 0.606557377 | 0.92622951 | 0.66367713 | 1.0134529 |
| A_55_P2039 | 18.3    | Detected | 15.6    | Detected   | 14.3    | Not Detect | 11.1    | Not Detect | Zfp605        | 0.606557377 | 0.78142077 | 0.71153846 | 0.9166667 |
| A_55_P2022 | 19552.6 | Detected | 12647.3 | Detected   | 15780.7 | Detected   | 11856.9 | Detected   | Csnk2a1       | 0.606410401 | 0.80708959 | 0.93750445 | 1.2477525 |
| A_51_P4588 | 16      | Detected | 17.9    | Detected   | 20.5    | Detected   | 9.7     | Not Detect | Ina           | 0.60625     | 1.28125    | 0.54189944 | 1.1452514 |
| A_66_P1327 | 33.5    | Detected | 27      | Detected   | 19.7    | Detected   | 20.3    | Not Detect | Il20          | 0.605970149 | 0.5880597  | 0.75185185 | 0.7296296 |
| A_55_P2036 | 93863   | Detected | 70947.8 | Detected   | 77236.8 | Detected   | 56870.4 | Detected   | Ssrp1         | 0.605887304 | 0.82286737 | 0.80158088 | 1.0886426 |
| A_55_P2013 | 72.7    | Detected | 62.8    | Detected   | 50.3    | Detected   | 44      | Not Detect | Agbl4         | 0.60522696  | 0.69188446 | 0.70063694 | 0.8009554 |
| A_55_P1978 | 15.7    | Detected | 67.1    | Detected   | 6.8     | Not Detect | 9.5     | Not Detect | Adamts14      | 0.605095541 | 0.43312102 | 0.14157973 | 0.1013413 |
| A_55_P2135 | 16.2    | Detected | 11.2    | Not Detect | 3.5     | Not Detect | 9.8     | Not Detect | Pkd1l2        | 0.604938272 | 0.21604938 | 0.875      | 0.3125    |
| A_55_P2041 | 42173.6 | Detected | 28410.9 | Detected   | 26710.5 | Detected   | 25510.1 | Detected   | Ccnd3         | 0.60488315  | 0.63334645 | 0.89789834 | 0.9401497 |
| A_55_P1989 | 3518.9  | Detected | 1488.1  | Detected   | 2444.5  | Detected   | 2128.2  | Detected   | Slc22a23      | 0.60479127  | 0.69467731 | 1.43014582 | 1.6426987 |
| A_55_P1952 | 7575.3  | Detected | 6066.9  | Detected   | 5388.7  | Detected   | 4580.9  | Detected   | Xylt2         | 0.604715325 | 0.71135137 | 0.75506437 | 0.8882131 |
| A_52_P7714 | 39.2    | Detected | 39.4    | Detected   | 32.3    | Detected   | 23.7    | Not Detect | 1110035M17Rik | 0.604591837 | 0.82397959 | 0.60152284 | 0.819797  |
| A_55_P2020 | 3317.7  | Detected | 2084.8  | Detected   | 3012.2  | Detected   | 2005.7  | Detected   | Ehd4          | 0.604545318 | 0.90791814 | 0.96205871 | 1.4448388 |
| A_52_P3247 | 929.5   | Detected | 810.8   | Detected   | 377.1   | Detected   | 561.8   | Detected   | Tmed8         | 0.604410974 | 0.40570199 | 0.69289591 | 0.4650962 |
| A_52_P6679 | 36.4    | Detected | 28.1    | Detected   | 38.5    | Detected   | 22      | Not Detect | Tcte2         | 0.604395604 | 1.05769231 | 0.78291815 | 1.3701068 |
| A_51_P2921 | 14.4    | Detected | 7.5     | Not Detect | 3.1     | Not Detect | 8.7     | Not Detect | Prl7d1        | 0.604166667 | 0.21527778 | 1.16       | 0.4133333 |
| A_55_P1988 | 58.6    | Detected | 50      | Detected   | 62      | Detected   | 35.4    | Not Detect | Rbpjl         | 0.604095563 | 1.05802048 | 0.708      | 1.24      |
| A_55_P1964 | 1860.5  | Detected | 1053.5  | Detected   | 1369.7  | Detected   | 1123.9  | Detected   | Dnrtip1       | 0.604084923 | 0.73619995 | 1.06682487 | 1.3001424 |
| A_55_P2187 | 24.5    | Detected | 12.1    | Not Detect | 16.6    | Not Detect | 14.8    | Not Detect | 4930505N22Rik | 0.604081633 | 0.67755102 | 1.2231405  | 1.3719008 |
| A_55_P2154 | 381.7   | Detected | 253.1   | Detected   | 350.6   | Detected   | 230.5   | Detected   | Pofut1        | 0.603877391 | 0.9185224  | 0.91070723 | 1.3852232 |
| A_55_P2084 | 459     | Detected | 324.3   | Detected   | 341.4   | Detected   | 277.1   | Detected   | Polr3f        | 0.603703704 | 0.74379085 | 0.85445575 | 1.052729  |
| A_55_P2027 | 28      | Detected | 27      | Detected   | 19.4    | Detected   | 16.9    | Not Detect | Fsd1l         | 0.603571429 | 0.69285714 | 0.62592593 | 0.7185185 |
| A_66_P1220 | 1315.6  | Detected | 1451.5  | Detected   | 1126.6  | Detected   | 793.9   | Detected   | Zc3h8         | 0.603450897 | 0.85633931 | 0.54695143 | 0.7761626 |
| A_55_P2189 | 655.5   | Detected | 362.6   | Detected   | 518.7   | Detected   | 395.4   | Detected   | LOC106740     | 0.603203661 | 0.79130435 | 1.0904578  | 1.4305019 |
| A_55_P2149 | 2522.4  | Detected | 1502    | Detected   | 1418.9  | Detected   | 1521.5  | Detected   | Prx           | 0.603195369 | 0.56251982 | 1.01298269 | 0.9446738 |
| A_55_P2071 | 10005.5 | Detected | 6824.6  | Detected   | 4878.1  | Detected   | 6034.5  | Detected   | Tnfrsf23      | 0.603118285 | 0.48754185 | 0.88422765 | 0.7147818 |
| A_55_P2047 | 588.6   | Detected | 715.4   | Detected   | 270.6   | Detected   | 354.9   | Detected   | Cubn          | 0.602956167 | 0.45973496 | 0.49608611 | 0.3782499 |
| A_52_P2390 | 507.4   | Detected | 372.8   | Detected   | 407.7   | Detected   | 305.8   | Detected   | Zfp955b       | 0.602680331 | 0.80350808 | 0.82027897 | 1.0936159 |

|            |                  |                 |                  |                  |               |                   |            |            |           |
|------------|------------------|-----------------|------------------|------------------|---------------|-------------------|------------|------------|-----------|
| A_55_P2067 | 15.1 Detected    | 121.2 Detected  | 3.3 Not Detect   | 9.1 Not Detect   | Slc13a3       | 0.602649007       | 0.21854305 | 0.07508251 | 0.0272277 |
| A_55_P2029 | 1835.1 Detected  | 1200 Detected   | 1407.8 Detected  | 1105.7 Detected  | Gm6712        | 0.602528473       | 0.76715165 | 0.92141667 | 1.1731667 |
| A_55_P2143 | 6421.7 Detected  | 4634.7 Detected | 5532.2 Detected  | 3868.5 Detected  | Axin1         | 0.602410577       | 0.86148528 | 0.83468186 | 1.1936479 |
| A_55_P2111 | 91.8 Detected    | 67.7 Detected   | 79.3 Detected    | 55.3 Detected    | E230008N13Rik | 0.602396514       | 0.86383442 | 0.816839   | 1.1713442 |
| A_55_P2007 | 21622.9 Detected | 9642.8 Detected | 19504.3 Detected | 13025.2 Detected | Agps          | 0.602379884       | 0.90202054 | 1.35076949 | 2.0226801 |
| A_55_P1999 | 650.8 Detected   | 462 Detected    | 289.1 Detected   | 391.8 Detected   | Nyap1         | 0.602028273       | 0.4442225  | 0.84805195 | 0.6257576 |
| A_55_P2138 | 692.3 Detected   | 588.7 Detected  | 350.8 Detected   | 416.7 Detected   | Psd3          | 0.601906688       | 0.50671674 | 0.70783081 | 0.5958892 |
| A_51_P3110 | 237.6 Detected   | 156.8 Detected  | 251.4 Detected   | 143 Detected     | Tgfbra1       | 0.601851852       | 1.05808081 | 0.9119898  | 1.6033163 |
| A_55_P2029 | 323.7 Detected   | 237.5 Detected  | 137.6 Detected   | 194.8 Detected   | Ptprs         | 0.601791783       | 0.42508496 | 0.82021053 | 0.5793684 |
| A_52_P6578 | 1469.5 Detected  | 987.8 Detected  | 917.8 Detected   | 884.1 Detected   | Cep152        | 0.601633209       | 0.62456618 | 0.89501923 | 0.9291355 |
| A_55_P1972 | 83.8 Detected    | 100.6 Detected  | 65.1 Detected    | 50.4 Detected    | Zfp92         | 0.601431981       | 0.77684964 | 0.50099404 | 0.6471173 |
| A_66_P1093 | 14.3 Detected    | 22.3 Detected   | 24.2 Detected    | 8.6 Not Detect   | Prex2         | 0.601398601       | 1.69230769 | 0.38565022 | 1.0852018 |
| A_55_P2147 | 14.8 Detected    | 3.8 Not Detect  | 7.3 Not Detect   | 8.9 Not Detect   | Tnfaip6       | 0.601351351       | 0.49324324 | 2.34210526 | 1.9210526 |
| A_55_P2006 | 963 Detected     | 616.6 Detected  | 690.5 Detected   | 579 Detected     | Gm14431       | 0.601246106       | 0.71703011 | 0.93902043 | 1.1198508 |
| A_55_P2059 | 4253.2 Detected  | 4824.4 Detected | 1747.6 Detected  | 2556.9 Detected  | Ghr           | 0.601170883       | 0.41089062 | 0.52999337 | 0.3622419 |
| A_52_P5526 | 2746 Detected    | 1899.1 Detected | 1260.5 Detected  | 1650.6 Detected  | Fzd7          | 0.601092498       | 0.45903132 | 0.86914854 | 0.6637355 |
| A_51_P2103 | 1681.9 Detected  | 707.2 Detected  | 3799.3 Detected  | 1010.8 Detected  | Glrx          | 0.600986979       | 2.25893335 | 1.42929864 | 5.3723133 |
| A_55_P1990 | 179.9 Detected   | 95.4 Detected   | 123.6 Detected   | 108.1 Detected   | Kif3b         | 0.600889383       | 0.68704836 | 1.13312369 | 1.2955975 |
| A_51_P4897 | 265.5 Detected   | 193.4 Detected  | 256.2 Detected   | 159.5 Detected   | Tmem194b      | 0.600753296       | 0.96497175 | 0.82471562 | 1.3247156 |
| A_52_P1734 | 293.8 Detected   | 174.9 Detected  | 220.3 Detected   | 176.5 Detected   | Wscd2         | 0.600748809       | 0.74982982 | 1.00914808 | 1.2595769 |
| A_55_P2067 | 1205.5 Detected  | 881.5 Detected  | 454.5 Detected   | 724.1 Detected   | 2410089E03Rik | 0.600663625       | 0.37702198 | 0.82144073 | 0.5155984 |
| A_55_P2114 | 302.1 Detected   | 221.7 Detected  | 206.6 Detected   | 181.4 Detected   | Icmt          | 0.600463423       | 0.68387951 | 0.81822282 | 0.9318899 |
| A_55_P1981 | 619 Detected     | 479.4 Detected  | 559.1 Detected   | 371.6 Detected   |               | 8-Sep 0.600323102 | 0.90323102 | 0.77513559 | 1.1662495 |
| A_66_P1120 | 1115.3 Detected  | 621.3 Detected  | 1102.9 Detected  | 669.4 Detected   | H2-T10        | 0.600197256       | 0.98888192 | 1.07741832 | 1.7751489 |
| A_55_P2057 | 2706.3 Detected  | 1836.8 Detected | 1946 Detected    | 1624.2 Detected  | Tbc1d19       | 0.600155193       | 0.71906293 | 0.88425523 | 1.0594512 |
| A_52_P6109 | 14.5 Detected    | 3 Not Detect    | 3.1 Not Detect   | 8.7 Not Detect   | St18          | 0.6               | 0.2137931  | 2.9        | 1.0333333 |
| A_55_P2328 | 27.5 Detected    | 8.4 Not Detect  | 9.3 Not Detect   | 16.5 Not Detect  | 9630017O17    | 0.6               | 0.33818182 | 1.96428571 | 1.1071429 |
| A_55_P2398 | 14 Detected      | 9.3 Not Detect  | 11 Not Detect    | 8.4 Not Detect   | Rnf112        | 0.6               | 0.78571429 | 0.90322581 | 1.1827957 |
| A_55_P2157 | 29.5 Detected    | 26.4 Detected   | 29.1 Detected    | 17.7 Not Detect  | Gm10864       | 0.6               | 0.98644068 | 0.67045455 | 1.1022727 |
| A_52_P3132 | 31.5 Detected    | 35.6 Detected   | 23.5 Detected    | 18.9 Not Detect  | Slc8a1        | 0.6               | 0.74603175 | 0.53089888 | 0.6601124 |
| A_52_P6568 | 6969.9 Detected  | 5231.2 Detected | 4631.4 Detected  | 4181.3 Detected  | Fam98b        | 0.599908177       | 0.66448586 | 0.79930035 | 0.8853418 |
| A_55_P2022 | 537.3 Detected   | 193.2 Detected  | 650.8 Detected   | 322.3 Detected   | Glicc1        | 0.599851107       | 1.21124139 | 1.66821946 | 3.36853   |
| A_55_P2010 | 42536.8 Detected | 36996 Detected  | 34003.9 Detected | 25504.3 Detected | 2700094K13Rik | 0.599582009       | 0.79939958 | 0.68937993 | 0.9191237 |
| A_52_P1932 | 3364.9 Detected  | 2027.3 Detected | 2786.5 Detected  | 2017.4 Detected  | 1600002H07Rik | 0.599542334       | 0.82810782 | 0.99511666 | 1.3744882 |
| A_66_P1320 | 1906.8 Detected  | 1967.5 Detected | 1484 Detected    | 1143.2 Detected  | Jmjd4         | 0.599538494       | 0.77826725 | 0.58104193 | 0.7542567 |
| A_55_P2032 | 81.4 Detected    | 57.1 Detected   | 89.2 Detected    | 48.8 Not Detect  | Zfp715        | 0.5995086         | 1.0958231  | 0.85464098 | 1.5621716 |
| A_52_P3525 | 563.5 Detected   | 343.1 Detected  | 281.8 Detected   | 337.8 Detected   | Qser1         | 0.599467613       | 0.50008873 | 0.98455261 | 0.8213349 |
| A_55_P2178 | 37.2 Detected    | 8.1 Not Detect  | 45.7 Detected    | 22.3 Not Detect  | LOC100048662  | 0.599462366       | 1.22849462 | 2.75308642 | 5.6419753 |
| A_51_P1670 | 1058.4 Detected  | 891.1 Detected  | 629 Detected     | 634.4 Detected   | Hs6st1        | 0.599395314       | 0.59429327 | 0.71192908 | 0.7058692 |
| A_51_P2341 | 620.3 Detected   | 1013.8 Detected | 845.3 Detected   | 371.7 Detected   | Nod1          | 0.599226181       | 1.36272771 | 0.36664036 | 0.8337936 |



|            |                  |                  |                  |                               |             |            |            |           |
|------------|------------------|------------------|------------------|-------------------------------|-------------|------------|------------|-----------|
| A_55_P2072 | 71.1 Detected    | 56.3 Detected    | 50.8 Detected    | 42.6 Not Detect Ctsc          | 0.599156118 | 0.71448664 | 0.75666075 | 0.9023091 |
| A_55_P1987 | 22.2 Detected    | 14.9 Not Detect  | 8.1 Not Detect   | 13.3 Not Detect Ptrpd         | 0.599099099 | 0.36486486 | 0.89261745 | 0.5436242 |
| A_55_P1966 | 22.2 Detected    | 24.4 Detected    | 21.7 Detected    | 13.3 Not Detect Podxl         | 0.599099099 | 0.97747748 | 0.54508197 | 0.8893443 |
| A_55_P2107 | 713.1 Detected   | 171 Detected     | 268.3 Detected   | 427.1 Detected Tssk6          | 0.598934231 | 0.37624457 | 2.49766082 | 1.5690058 |
| A_55_P2421 | 17.7 Detected    | 14.3 Not Detect  | 10.4 Not Detect  | 10.6 Not Detect 4933408J17Rik | 0.598870056 | 0.58757062 | 0.74125874 | 0.7272727 |
| A_55_P2074 | 184.4 Detected   | 81.5 Detected    | 171.5 Detected   | 110.4 Detected Rxra           | 0.598698482 | 0.93004338 | 1.35460123 | 2.1042945 |
| A_51_P4414 | 15.2 Detected    | 3.2 Not Detect   | 24 Detected      | 9.1 Not Detect Pf4            | 0.598684211 | 1.57894737 | 2.84375    | 7.5       |
| A_55_P2094 | 1032.6 Detected  | 625.4 Detected   | 1409 Detected    | 618.2 Detected 2700089E24Rik  | 0.598682936 | 1.36451675 | 0.98848737 | 2.2529581 |
| A_55_P2154 | 45.1 Detected    | 28.6 Detected    | 35.7 Detected    | 27 Not Detect Cd320           | 0.598669623 | 0.79157428 | 0.94405594 | 1.2482517 |
| A_52_P1500 | 8431.2 Detected  | 5400.6 Detected  | 6435.1 Detected  | 5045.9 Detected Mapkapk2      | 0.598479457 | 0.76324841 | 0.93432211 | 1.1915528 |
| A_55_P1966 | 3456.1 Detected  | 2721 Detected    | 2975.5 Detected  | 2067.6 Detected Glmn          | 0.598246579 | 0.86094152 | 0.7598677  | 1.0935318 |
| A_52_P3910 | 50.5 Detected    | 25.5 Detected    | 25.3 Detected    | 30.2 Not Detect Jade3         | 0.598019802 | 0.5009901  | 1.18431373 | 0.9921569 |
| A_55_P2182 | 2568.5 Detected  | 3000 Detected    | 2549.5 Detected  | 1535.9 Detected Adat3         | 0.597975472 | 0.99260269 | 0.51196667 | 0.8498333 |
| A_55_P1997 | 249.2 Detected   | 167.4 Detected   | 109.5 Detected   | 149 Detected Dbndd1           | 0.597913323 | 0.4394061  | 0.89008363 | 0.6541219 |
| A_55_P2156 | 321.3 Detected   | 411.5 Detected   | 266.6 Detected   | 192.1 Detected Fam132b        | 0.597883598 | 0.82975412 | 0.46682868 | 0.6478736 |
| A_55_P2159 | 4301.9 Detected  | 2508.4 Detected  | 3131.7 Detected  | 2571.6 Detected Zfp534        | 0.597782375 | 0.72798066 | 1.02519534 | 1.2484851 |
| A_52_P1289 | 5040.8 Detected  | 3235.3 Detected  | 3654.6 Detected  | 3012.5 Detected Nhej1         | 0.597623393 | 0.72500397 | 0.93113467 | 1.1296016 |
| A_55_P2025 | 38 Detected      | 25.4 Detected    | 27.9 Detected    | 22.7 Not Detect Mup21         | 0.597368421 | 0.73421053 | 0.89370079 | 1.0984252 |
| A_51_P2384 | 21328.8 Detected | 14205.1 Detected | 13461.1 Detected | 12740.7 Detected Ccnd3        | 0.597347249 | 0.63112318 | 0.89691026 | 0.9476244 |
| A_55_P2009 | 14.4 Detected    | 19.3 Detected    | 11.6 Not Detect  | 8.6 Not Detect LOC101056101   | 0.597222222 | 0.80555556 | 0.44559585 | 0.6010363 |
| A_52_P2324 | 191.4 Detected   | 136.6 Detected   | 186.7 Detected   | 114.3 Detected Mief2          | 0.597178683 | 0.9754441  | 0.83674963 | 1.3667643 |
| A_55_P2089 | 1642.4 Detected  | 1002.8 Detected  | 1069.4 Detected  | 980.4 Detected 2900097C17Rik  | 0.59693132  | 0.65112031 | 0.97766254 | 1.066414  |
| A_55_P2386 | 25.8 Detected    | 21.8 Detected    | 21.6 Detected    | 15.4 Not Detect AU023639      | 0.596899225 | 0.8372093  | 0.70642202 | 0.9908257 |
| A_51_P5044 | 19.1 Detected    | 7.7 Not Detect   | 3.2 Not Detect   | 11.4 Not Detect Dll3          | 0.596858639 | 0.16753927 | 1.48051948 | 0.4155844 |
| A_55_P2328 | 279.3 Detected   | 200.1 Detected   | 217.4 Detected   | 166.7 Detected LOC552877      | 0.596849266 | 0.77837451 | 0.83308346 | 1.0864568 |
| A_55_P1969 | 4672.9 Detected  | 2534.4 Detected  | 4028.3 Detected  | 2788.9 Detected Pam           | 0.596824242 | 0.86205568 | 1.10041824 | 1.5894492 |
| A_52_P6739 | 30.5 Detected    | 21.9 Detected    | 29.4 Detected    | 18.2 Not Detect A230072C01Rik | 0.596721311 | 0.96393443 | 0.83105023 | 1.3424658 |
| A_52_P2583 | 484 Detected     | 383.1 Detected   | 488 Detected     | 288.8 Detected Mob3b          | 0.596694215 | 1.00826446 | 0.75385017 | 1.2738188 |
| A_55_P2002 | 9523.4 Detected  | 6194.4 Detected  | 7520.7 Detected  | 5682.5 Detected Kbtbd4        | 0.596688158 | 0.78970746 | 0.91736084 | 1.2141127 |
| A_55_P1990 | 18.1 Detected    | 6.1 Not Detect   | 8.9 Not Detect   | 10.8 Not Detect Mylk3         | 0.596685083 | 0.49171271 | 1.7704918  | 1.4590164 |
| A_52_P5584 | 142.8 Detected   | 104.2 Detected   | 143.9 Detected   | 85.2 Detected Cav2            | 0.596638655 | 1.00770308 | 0.81765835 | 1.3809981 |
| A_55_P2070 | 47.6 Detected    | 46.7 Detected    | 28.3 Detected    | 28.4 Not Detect Adam1a        | 0.596638655 | 0.59453782 | 0.60813704 | 0.6059957 |
| A_55_P2143 | 35.2 Detected    | 13.2 Not Detect  | 24.5 Detected    | 21 Not Detect Dyrk1a          | 0.596590909 | 0.69602273 | 1.59090909 | 1.8560606 |
| A_55_P2159 | 2009.9 Detected  | 421.4 Detected   | 201.8 Detected   | 1199 Detected Lifr            | 0.596547092 | 0.10040301 | 2.84527765 | 0.4788799 |
| A_55_P2163 | 17.1 Detected    | 22.1 Detected    | 8 Not Detect     | 10.2 Not Detect Trim12c       | 0.596491228 | 0.46783626 | 0.46153846 | 0.361991  |
| A_52_P7877 | 187.6 Detected   | 164.3 Detected   | 117.3 Detected   | 111.9 Detected Chpt1          | 0.596481876 | 0.62526652 | 0.68107121 | 0.7139379 |
| A_55_P2145 | 260.1 Detected   | 240.2 Detected   | 199.9 Detected   | 155.1 Detected Znr3           | 0.596309112 | 0.76855056 | 0.64571191 | 0.8322231 |
| A_52_P8395 | 138.7 Detected   | 139.9 Detected   | 116 Detected     | 82.7 Detected Taf7            | 0.596250901 | 0.83633742 | 0.59113653 | 0.8291637 |
| A_55_P2005 | 9814 Detected    | 2811 Detected    | 7777.9 Detected  | 5849.6 Detected Nacc2         | 0.596046464 | 0.79253108 | 2.08096763 | 2.7669513 |
| A_66_P1253 | 177.9 Detected   | 161.3 Detected   | 137.2 Detected   | 106 Detected Atp8b4           | 0.59584036  | 0.77121979 | 0.65716057 | 0.850589  |

|            |         |          |         |            |         |            |         |            |               |             |            |            |           |
|------------|---------|----------|---------|------------|---------|------------|---------|------------|---------------|-------------|------------|------------|-----------|
| A_51_P3546 | 836.3   | Detected | 881.5   | Detected   | 700.2   | Detected   | 498.3   | Detected   | Slc25a30      | 0.595838814 | 0.83725936 | 0.56528644 | 0.7943279 |
| A_55_P2136 | 574.5   | Detected | 479.4   | Detected   | 564.5   | Detected   | 342.3   | Detected   | Kmt2d         | 0.595822454 | 0.98259356 | 0.71401752 | 1.1775136 |
| A_52_P9189 | 143.2   | Detected | 64.5    | Detected   | 166.3   | Detected   | 85.3    | Detected   | Ppp4r1-ps     | 0.595670391 | 1.16131285 | 1.32248062 | 2.5782946 |
| A_55_P1987 | 15714.5 | Detected | 26937.2 | Detected   | 5994.9  | Detected   | 9360.2  | Detected   | Fam213a       | 0.595640969 | 0.38148843 | 0.34748229 | 0.222551  |
| A_55_P2143 | 3874.6  | Detected | 1483.3  | Detected   | 2584.1  | Detected   | 2307.1  | Detected   | Pank2         | 0.59544211  | 0.66693336 | 1.55538327 | 1.742129  |
| A_55_P2012 | 16.8    | Detected | 14.7    | Not Detect | 9.4     | Not Detect | 10      | Not Detect | Tnfrsf19      | 0.595238095 | 0.55952381 | 0.68027211 | 0.6394558 |
| A_55_P1955 | 1914.6  | Detected | 794.1   | Detected   | 562.2   | Detected   | 1139.6  | Detected   | Camk1d        | 0.595215711 | 0.29363836 | 1.43508374 | 0.7079713 |
| A_55_P2262 | 103.4   | Detected | 119.1   | Detected   | 314.1   | Detected   | 61.5    | Detected   | 5730471H19Rik | 0.594777563 | 3.0377176  | 0.5163728  | 2.6372796 |
| A_55_P1966 | 20880.9 | Detected | 15963.4 | Detected   | 10671   | Detected   | 12419   | Detected   | Dlg5          | 0.594754058 | 0.51104119 | 0.7779671  | 0.6684666 |
| A_55_P2161 | 1128.3  | Detected | 837.2   | Detected   | 735.3   | Detected   | 670.9   | Detected   | Pdlim7        | 0.594611362 | 0.65168838 | 0.80136168 | 0.8782848 |
| A_52_P4095 | 14.8    | Detected | 23.5    | Detected   | 3.2     | Not Detect | 8.8     | Not Detect | Rassf4        | 0.594594595 | 0.21621622 | 0.37446809 | 0.1361702 |
| A_55_P2079 | 961.5   | Detected | 1671.9  | Detected   | 1243.2  | Detected   | 571.7   | Detected   | Snora74a      | 0.594591784 | 1.29297972 | 0.34194629 | 0.7435851 |
| A_55_P2126 | 7654.9  | Detected | 5146    | Detected   | 4289.6  | Detected   | 4549.8  | Detected   | Msantd3       | 0.594364394 | 0.56037309 | 0.88414302 | 0.8335795 |
| A_55_P1957 | 11209.5 | Detected | 9480.1  | Detected   | 5824.5  | Detected   | 6660.2  | Detected   | Unc119        | 0.594156742 | 0.51960391 | 0.70254533 | 0.6143923 |
| A_51_P4618 | 78.6    | Detected | 141.7   | Detected   | 37.8    | Detected   | 46.7    | Detected   | Tnnc1         | 0.594147583 | 0.48091603 | 0.32956951 | 0.2667608 |
| A_51_P5092 | 2164.5  | Detected | 1560.5  | Detected   | 1889.5  | Detected   | 1285.9  | Detected   | Arfgap1       | 0.594086394 | 0.87294987 | 0.82403076 | 1.2108299 |
| A_51_P3785 | 472.2   | Detected | 871.9   | Detected   | 163.1   | Detected   | 280.5   | Detected   | Oplah         | 0.594027954 | 0.34540449 | 0.32171121 | 0.1870627 |
| A_55_P2418 | 22.9    | Detected | 5.5     | Not Detect | 3.7     | Not Detect | 13.6    | Not Detect | AU021884      | 0.593886463 | 0.16157205 | 2.47272727 | 0.6727273 |
| A_55_P1992 | 471     | Detected | 257.8   | Detected   | 112.5   | Detected   | 279.7   | Detected   | Ptprg         | 0.593842887 | 0.2388535  | 1.08494957 | 0.4363848 |
| A_51_P2271 | 33554.4 | Detected | 25436.1 | Detected   | 30718.8 | Detected   | 19923.5 | Detected   | Bri3bp        | 0.593767136 | 0.91549245 | 0.78327652 | 1.2076851 |
| A_52_P6680 | 422.5   | Detected | 293.7   | Detected   | 424.1   | Detected   | 250.8   | Detected   | Asb1          | 0.593609467 | 1.00378698 | 0.85393258 | 1.4439905 |
| A_51_P3883 | 21.9    | Detected | 10.8    | Not Detect | 17.1    | Detected   | 13      | Not Detect | Glg           | 0.593607306 | 0.78082192 | 1.2037037  | 1.5833333 |
| A_55_P2376 | 15.5    | Detected | 3.3     | Not Detect | 3.3     | Not Detect | 9.2     | Not Detect | 4930521G14Rik | 0.593548387 | 0.21290323 | 2.78787879 | 1         |
| A_52_P4603 | 360.8   | Detected | 224.3   | Detected   | 223.9   | Detected   | 214.1   | Detected   | Kctd18        | 0.593403548 | 0.62056541 | 0.95452519 | 0.9982167 |
| A_55_P1952 | 15      | Detected | 3.2     | Not Detect | 7.7     | Not Detect | 8.9     | Not Detect | Gm3772        | 0.593333333 | 0.51333333 | 2.78125    | 2.40625   |
| A_55_P2008 | 1579.4  | Detected | 1149.6  | Detected   | 1530.3  | Detected   | 936.9   | Detected   | Cdc123        | 0.593199949 | 0.96891225 | 0.81497912 | 1.3311587 |
| A_51_P2272 | 20.4    | Detected | 102.1   | Detected   | 20.5    | Detected   | 12.1    | Not Detect | Csn3          | 0.593137255 | 1.00490196 | 0.11851126 | 0.2007835 |
| A_55_P2045 | 2102.8  | Detected | 885.6   | Detected   | 1105.6  | Detected   | 1247.2  | Detected   | Plcx2         | 0.593113943 | 0.52577516 | 1.40831075 | 1.2484192 |
| A_55_P2042 | 14.5    | Detected | 9.9     | Not Detect | 14.3    | Not Detect | 8.6     | Not Detect | Nlrp2         | 0.593103448 | 0.9862069  | 0.86868687 | 1.4444444 |
| A_55_P1983 | 17.2    | Detected | 15.6    | Not Detect | 10.2    | Not Detect | 10.2    | Not Detect | Rgag1         | 0.593023256 | 0.59302326 | 0.65384615 | 0.6538462 |
| A_52_P6091 | 3432.9  | Detected | 2829.2  | Detected   | 1627.8  | Detected   | 2035.7  | Detected   | Pdpx          | 0.592997174 | 0.47417635 | 0.71953202 | 0.575357  |
| A_55_P2017 | 50.6    | Detected | 29.8    | Detected   | 38.9    | Detected   | 30      | Not Detect | Spaca6        | 0.592885375 | 0.7687747  | 1.00671141 | 1.3053691 |
| A_51_P2381 | 185.2   | Detected | 65.9    | Detected   | 255.9   | Detected   | 109.8   | Detected   | Etnk2         | 0.59287257  | 1.38174946 | 1.66616085 | 3.8831563 |
| A_55_P2392 | 61.4    | Detected | 40.1    | Detected   | 40.8    | Detected   | 36.4    | Not Detect | 9330159F19Rik | 0.592833876 | 0.66449511 | 0.90773067 | 1.0174564 |
| A_55_P2031 | 16.7    | Detected | 21.8    | Detected   | 26.3    | Detected   | 9.9     | Not Detect | Ccdc8         | 0.592814371 | 1.5748503  | 0.45412844 | 1.206422  |
| A_52_P1373 | 1878.3  | Detected | 1148    | Detected   | 966     | Detected   | 1113.4  | Detected   | Cbx2          | 0.592770058 | 0.51429484 | 0.96986063 | 0.8414634 |
| A_55_P1982 | 24.8    | Detected | 21.6    | Detected   | 23.1    | Detected   | 14.7    | Not Detect | Gm4432        | 0.592741935 | 0.93145161 | 0.68055556 | 1.0694444 |
| A_52_P1638 | 458.1   | Detected | 260.2   | Detected   | 212.1   | Detected   | 271.5   | Detected   | Ivns1abp      | 0.592665357 | 0.46299935 | 1.04342813 | 0.8151422 |
| A_52_P1942 | 1507.7  | Detected | 1488.8  | Detected   | 1475.1  | Detected   | 893.5   | Detected   | Ets1          | 0.592624527 | 0.97837766 | 0.60014777 | 0.990798  |
| A_55_P2057 | 16.2    | Detected | 12.7    | Not Detect | 19.2    | Detected   | 9.6     | Not Detect | Caskin1       | 0.592592593 | 1.18518519 | 0.75590551 | 1.511811  |

|            |                  |                  |                  |                  |               |             |            |            |           |
|------------|------------------|------------------|------------------|------------------|---------------|-------------|------------|------------|-----------|
| A_51_P2203 | 531.6 Detected   | 550.1 Detected   | 252.5 Detected   | 314.9 Detected   | Cdca7l        | 0.592362679 | 0.47498119 | 0.57244137 | 0.4590075 |
| A_55_P1957 | 605.3 Detected   | 451.4 Detected   | 542.9 Detected   | 358.4 Detected   | Lsp1          | 0.592103089 | 0.89691062 | 0.7939743  | 1.2027027 |
| A_55_P2032 | 14.7 Detected    | 13.4 Not Detect  | 10.7 Not Detect  | 8.7 Not Detect   | 1700125H20Rik | 0.591836735 | 0.72789116 | 0.64925373 | 0.7985075 |
| A_65_P0611 | 73 Detected      | 114.3 Detected   | 57.9 Detected    | 43.2 Not Detect  | Zscan4a       | 0.591780822 | 0.79315068 | 0.37795276 | 0.5065617 |
| A_55_P2050 | 16.9 Detected    | 7.5 Not Detect   | 7.9 Not Detect   | 10 Not Detect    | Olf913        | 0.591715976 | 0.46745562 | 1.33333333 | 1.0533333 |
| A_66_P1107 | 16.9 Detected    | 9.1 Not Detect   | 11.7 Not Detect  | 10 Not Detect    | Lrco1         | 0.591715976 | 0.69230769 | 1.0989011  | 1.2857143 |
| A_55_P1964 | 21523.7 Detected | 15239.2 Detected | 40313.1 Detected | 12733.8 Detected | Ii33          | 0.591617612 | 1.87296329 | 0.83559504 | 2.6453554 |
| A_52_P6708 | 16.4 Detected    | 4.7 Not Detect   | 3.5 Not Detect   | 9.7 Not Detect   | 0610007N19Rik | 0.591463415 | 0.21341463 | 2.06382979 | 0.7446809 |
| A_55_P2184 | 18.6 Detected    | 9.9 Not Detect   | 15.3 Not Detect  | 11 Not Detect    | Sp100         | 0.591397849 | 0.82258065 | 1.11111111 | 1.5454545 |
| A_55_P2164 | 15.9 Detected    | 55.9 Detected    | 23.8 Detected    | 9.4 Not Detect   | Grip1         | 0.591194969 | 1.49685535 | 0.16815742 | 0.4257603 |
| A_52_P5742 | 2235.1 Detected  | 1785.6 Detected  | 1502.6 Detected  | 1321.2 Detected  | Rrp1b         | 0.591114492 | 0.67227417 | 0.73991935 | 0.8415099 |
| A_55_P2095 | 3335.3 Detected  | 1833.5 Detected  | 2664.5 Detected  | 1971.5 Detected  | Rara          | 0.59110125  | 0.79887866 | 1.07526588 | 1.4532315 |
| A_55_P2072 | 17.6 Detected    | 3.7 Not Detect   | 6.3 Not Detect   | 10.4 Not Detect  | Scn8a         | 0.590909091 | 0.35795455 | 2.81081081 | 1.7027027 |
| A_55_P2115 | 1172.6 Detected  | 908.5 Detected   | 870.2 Detected   | 692.8 Detected   | Metap1d       | 0.59082381  | 0.74211155 | 0.76257567 | 0.9578426 |
| A_55_P1995 | 1606.2 Detected  | 671.1 Detected   | 994.3 Detected   | 948.9 Detected   | Gm13157       | 0.590773254 | 0.61903872 | 1.41394725 | 1.4815974 |
| A_51_P4848 | 572.7 Detected   | 362.1 Detected   | 424.8 Detected   | 338.3 Detected   | Bcl2l11       | 0.590710669 | 0.74174961 | 0.9342723  | 1.1731566 |
| A_55_P2040 | 37.6 Detected    | 22.9 Detected    | 35.6 Detected    | 22.2 Not Detect  | Gm9763        | 0.590425532 | 0.94680851 | 0.96943231 | 1.5545852 |
| A_51_P4988 | 39521.5 Detected | 31335.9 Detected | 29774.4 Detected | 23330.8 Detected | Degs1         | 0.590331845 | 0.75337222 | 0.74453901 | 0.950169  |
| A_55_P2030 | 5073.2 Detected  | 2818.2 Detected  | 3134.8 Detected  | 2994.5 Detected  | Frm4a         | 0.590258614 | 0.61791374 | 1.06255766 | 1.1123412 |
| A_55_P2094 | 55.4 Detected    | 128 Detected     | 39 Detected      | 32.7 Not Detect  | Lhx6          | 0.590252708 | 0.70397112 | 0.25546875 | 0.3046875 |
| A_55_P2096 | 6398.7 Detected  | 3755.7 Detected  | 4410.2 Detected  | 3776.6 Detected  | Rbms1         | 0.590213637 | 0.68923375 | 1.00556487 | 1.1742684 |
| A_52_P3487 | 3067.3 Detected  | 2390.9 Detected  | 1952.5 Detected  | 1810.1 Detected  | Rhobtb3       | 0.590128126 | 0.63655332 | 0.75707892 | 0.8166381 |
| A_55_P2370 | 23.9 Detected    | 21.7 Detected    | 18.5 Detected    | 14.1 Not Detect  | 1700025K04Rik | 0.589958159 | 0.77405858 | 0.64976959 | 0.8525346 |
| A_55_P1955 | 26185.6 Detected | 27340.7 Detected | 30502.4 Detected | 15444.1 Detected | Rps24         | 0.589793627 | 1.16485397 | 0.56487581 | 1.1156408 |
| A_55_P2181 | 29.7 Detected    | 37.8 Detected    | 20.3 Detected    | 17.5 Not Detect  | Gpr180        | 0.589225589 | 0.68350168 | 0.46296296 | 0.537037  |
| A_55_P2095 | 25.3 Detected    | 17.5 Detected    | 20.1 Detected    | 14.9 Not Detect  | Rdh18-ps      | 0.588932806 | 0.7944664  | 0.85142857 | 1.1485714 |
| A_55_P2131 | 59.1 Detected    | 51.1 Detected    | 37.2 Detected    | 34.8 Not Detect  | Shroom2       | 0.588832487 | 0.62944162 | 0.68101761 | 0.7279843 |
| A_51_P4703 | 17.5 Detected    | 9.9 Not Detect   | 7.9 Not Detect   | 10.3 Not Detect  | 4930412O13Rik | 0.588571429 | 0.45142857 | 1.04040404 | 0.7979798 |
| A_55_P2152 | 435.2 Detected   | 326 Detected     | 372.9 Detected   | 256.1 Detected   | Scaf8         | 0.588465074 | 0.85684743 | 0.78558282 | 1.143865  |
| A_66_P1319 | 110.8 Detected   | 74.3 Detected    | 59.4 Detected    | 65.2 Detected    | Zfp934        | 0.588447653 | 0.53610108 | 0.87752355 | 0.7994616 |
| A_52_P3599 | 117.6 Detected   | 101.9 Detected   | 42 Detected      | 69.2 Detected    | Osbpl6        | 0.588435374 | 0.35714286 | 0.67909715 | 0.4121688 |
| A_55_P2102 | 25.5 Detected    | 12.5 Not Detect  | 13.5 Not Detect  | 15 Not Detect    | Ap4e1         | 0.588235294 | 0.52941176 | 1.2        | 1.08      |
| A_55_P2113 | 1598.2 Detected  | 1149.9 Detected  | 1353 Detected    | 940.1 Detected   | Whsc1         | 0.588224252 | 0.8465774  | 0.81754935 | 1.1766241 |
| A_55_P2064 | 5651 Detected    | 4119.8 Detected  | 5235 Detected    | 3323.4 Detected  | Pced1a        | 0.588108299 | 0.92638471 | 0.80668965 | 1.2706928 |
| A_51_P1864 | 95.4 Detected    | 60.7 Detected    | 98.4 Detected    | 56.1 Detected    | Pik3c2b       | 0.588050314 | 1.03144654 | 0.92421746 | 1.6210873 |
| A_52_P4937 | 125 Detected     | 62.1 Detected    | 120.1 Detected   | 73.5 Detected    | Wdr13         | 0.588       | 0.9608     | 1.18357488 | 1.9339775 |
| A_55_P2069 | 29.6 Detected    | 25.7 Detected    | 10.9 Not Detect  | 17.4 Not Detect  | 1700007E05Rik | 0.587837838 | 0.36824324 | 0.6770428  | 0.4241245 |
| A_51_P4009 | 76.4 Detected    | 81.3 Detected    | 64.7 Detected    | 44.9 Not Detect  | Rfpl4         | 0.587696335 | 0.84685864 | 0.55227552 | 0.795818  |
| A_55_P1976 | 21.1 Detected    | 20.7 Detected    | 18.6 Not Detect  | 12.4 Not Detect  | Olf913        | 0.587677725 | 0.88151659 | 0.59903382 | 0.8985507 |
| A_52_P3236 | 1856.3 Detected  | 1418.7 Detected  | 1451.9 Detected  | 1090.9 Detected  | Zfp955a       | 0.587674406 | 0.78214728 | 0.7689434  | 1.0234017 |

|            |         |          |         |            |         |            |         |            |               |             |            |            |           |
|------------|---------|----------|---------|------------|---------|------------|---------|------------|---------------|-------------|------------|------------|-----------|
| A_55_P2013 | 13137.8 | Detected | 9245.6  | Detected   | 10283.8 | Detected   | 7718.9  | Detected   | Dnajb6        | 0.587533681 | 0.78276424 | 0.8348728  | 1.1122913 |
| A_51_P3284 | 17452.2 | Detected | 12141.4 | Detected   | 12564.7 | Detected   | 10253.5 | Detected   | Cops2         | 0.587519052 | 0.71994935 | 0.84450722 | 1.0348642 |
| A_52_P1027 | 56      | Detected | 34.4    | Detected   | 54.4    | Detected   | 32.9    | Not Detect | Hsf5          | 0.5875      | 0.97142857 | 0.95639535 | 1.5813953 |
| A_55_P2075 | 217.9   | Detected | 127.3   | Detected   | 171.2   | Detected   | 128     | Detected   | 5430405H02Rik | 0.587425425 | 0.78568151 | 1.00549882 | 1.3448547 |
| A_55_P1972 | 3981.4  | Detected | 2737.5  | Detected   | 3195.5  | Detected   | 2338.7  | Detected   | Zfp960        | 0.58740644  | 0.80260712 | 0.85431963 | 1.1673059 |
| A_55_P2006 | 12181.2 | Detected | 11860.1 | Detected   | 10487.1 | Detected   | 7154.9  | Detected   | Bmp1          | 0.587372344 | 0.86092503 | 0.60327485 | 0.8842337 |
| A_52_P3709 | 962     | Detected | 338.8   | Detected   | 1122.2  | Detected   | 564.9   | Detected   | Glcci1        | 0.587214137 | 1.16652807 | 1.66735537 | 3.3122786 |
| A_55_P1958 | 2262.9  | Detected | 1357.8  | Detected   | 1731.7  | Detected   | 1328.8  | Detected   | Rnf114        | 0.587211101 | 0.76525697 | 0.97864192 | 1.2753719 |
| A_55_P2169 | 6241.7  | Detected | 5546.5  | Detected   | 5326.5  | Detected   | 3664.5  | Detected   | Thoc6         | 0.587099668 | 0.85337328 | 0.66068692 | 0.9603353 |
| A_51_P1224 | 18.4    | Detected | 7       | Not Detect | 9.4     | Not Detect | 10.8    | Not Detect | Olf15l1       | 0.586956522 | 0.51086957 | 1.54285714 | 1.3428571 |
| A_51_P4910 | 3647.5  | Detected | 2271.5  | Detected   | 2892.6  | Detected   | 2140.4  | Detected   | Gzf1          | 0.586812886 | 0.79303633 | 0.94228483 | 1.2734317 |
| A_55_P2074 | 6549.1  | Detected | 5069.5  | Detected   | 4480.8  | Detected   | 3842.5  | Detected   | Crim1         | 0.58672184  | 0.68418561 | 0.7579643  | 0.8838741 |
| A_55_P2145 | 347.6   | Detected | 198.8   | Detected   | 189.7   | Detected   | 203.9   | Detected   | Rilpl1        | 0.586593786 | 0.54574223 | 1.02565392 | 0.9542254 |
| A_55_P1973 | 16734.7 | Detected | 17013.1 | Detected   | 5324.4  | Detected   | 9816.3  | Detected   | Slc39a13      | 0.586583566 | 0.31816525 | 0.57698479 | 0.3129588 |
| A_55_P2152 | 54.9    | Detected | 41.5    | Detected   | 26.3    | Detected   | 32.2    | Not Detect | Gm1141        | 0.586520947 | 0.47905282 | 0.77590361 | 0.6337349 |
| A_52_P4256 | 170.5   | Detected | 129.7   | Detected   | 90.8    | Detected   | 100     | Detected   | Adcyp1        | 0.586510264 | 0.53255132 | 0.77101002 | 0.7000771 |
| A_55_P1963 | 18926.9 | Detected | 6427.3  | Detected   | 23891.1 | Detected   | 11100.8 | Detected   | Creg1         | 0.586509148 | 1.26228278 | 1.7271327  | 3.7171285 |
| A_55_P2365 | 1729    | Detected | 640.6   | Detected   | 614.7   | Detected   | 1013.9  | Detected   | Dut           | 0.586408329 | 0.35552342 | 1.58273494 | 0.9595692 |
| A_66_P1123 | 46.9    | Detected | 26.4    | Detected   | 36.9    | Detected   | 27.5    | Not Detect | Agt           | 0.586353945 | 0.78678038 | 1.04166667 | 1.3977273 |
| A_55_P1966 | 241.9   | Detected | 234.7   | Detected   | 137.6   | Detected   | 141.8   | Detected   | Il4ra         | 0.586192642 | 0.5688301  | 0.60417554 | 0.5862804 |
| A_55_P2006 | 739.5   | Detected | 376.1   | Detected   | 354.5   | Detected   | 433.4   | Detected   | Sfmbt1        | 0.58607167  | 0.47937796 | 1.1523531  | 0.9425685 |
| A_52_P1557 | 2600.3  | Detected | 759.4   | Detected   | 3278.5  | Detected   | 1523.9  | Detected   | Creg1         | 0.586047764 | 1.26081606 | 2.00671583 | 4.3172241 |
| A_55_P2146 | 15.7    | Detected | 11.5    | Not Detect | 13      | Not Detect | 9.2     | Not Detect | Olf1681       | 0.585987261 | 0.82802548 | 0.8        | 1.1304348 |
| A_55_P2055 | 117.5   | Detected | 95.8    | Detected   | 89.3    | Detected   | 68.8    | Detected   | Dvl2          | 0.585531915 | 0.76       | 0.71816284 | 0.9321503 |
| A_55_P2104 | 4134    | Detected | 2712.5  | Detected   | 3007.3  | Detected   | 2420.5  | Detected   | Kctd5         | 0.585510402 | 0.72745525 | 0.89235023 | 1.108682  |
| A_51_P1849 | 1879.3  | Detected | 1143.9  | Detected   | 907.4   | Detected   | 1100.1  | Detected   | Rilpl1        | 0.585377534 | 0.48283936 | 0.96170994 | 0.7932512 |
| A_55_P2068 | 16.4    | Detected | 17.7    | Detected   | 21.1    | Detected   | 9.6     | Not Detect | Colq          | 0.585365854 | 1.28658537 | 0.54237288 | 1.1920904 |
| A_55_P2115 | 9267.2  | Detected | 7497.9  | Detected   | 5720.5  | Detected   | 5424.6  | Detected   | Raet1e        | 0.5853548   | 0.61728462 | 0.72348258 | 0.762947  |
| A_66_P1212 | 38.1    | Detected | 26.5    | Detected   | 16.8    | Not Detect | 22.3    | Not Detect | Oscp1         | 0.585301837 | 0.44094488 | 0.84150943 | 0.6339623 |
| A_51_P2288 | 1464.8  | Detected | 1072.2  | Detected   | 317.9   | Detected   | 857.1   | Detected   | Stau2         | 0.585131076 | 0.21702622 | 0.79938444 | 0.2964932 |
| A_51_P2429 | 53      | Detected | 55.6    | Detected   | 57.7    | Detected   | 31      | Not Detect | Lat2          | 0.58490566  | 1.08867925 | 0.55755396 | 1.0377698 |
| A_55_P2162 | 202.1   | Detected | 182.3   | Detected   | 156     | Detected   | 118.2   | Detected   | 2210408121Rik | 0.584858981 | 0.7718951  | 0.64838179 | 0.8557323 |
| A_55_P2364 | 73.7    | Detected | 41.8    | Detected   | 26.1    | Detected   | 43.1    | Not Detect | 9430037G07Rik | 0.584803256 | 0.3541384  | 1.03110048 | 0.6244019 |
| A_55_P1956 | 23.6    | Detected | 11.8    | Not Detect | 10.5    | Not Detect | 13.8    | Not Detect | Sfmbt2        | 0.584745763 | 0.44491525 | 1.16949153 | 0.8898305 |
| A_55_P2042 | 31.3    | Detected | 21.2    | Detected   | 26.2    | Detected   | 18.3    | Not Detect | Mccc2         | 0.584664537 | 0.8370607  | 0.86320755 | 1.2358491 |
| A_52_P5821 | 18148.5 | Detected | 13192.2 | Detected   | 15002.9 | Detected   | 10604.2 | Detected   | Hcfc1r1       | 0.584301733 | 0.82667438 | 0.80382347 | 1.1372553 |
| A_51_P2347 | 78.9    | Detected | 92.3    | Detected   | 26.2    | Detected   | 46.1    | Not Detect | Cxxc5         | 0.584283904 | 0.33206591 | 0.49945829 | 0.283857  |
| A_51_P2114 | 299.5   | Detected | 138     | Detected   | 366.9   | Detected   | 174.9   | Detected   | C330013J21Rik | 0.583973289 | 1.22504174 | 1.2673913  | 2.6586957 |
| A_55_P1985 | 17.3    | Detected | 11.9    | Not Detect | 11.3    | Not Detect | 10.1    | Not Detect | Atp2b4        | 0.583815029 | 0.65317919 | 0.8487395  | 0.9495798 |
| A_51_P1697 | 122.5   | Detected | 24.6    | Detected   | 161.1   | Detected   | 71.5    | Detected   | Shc2          | 0.583673469 | 1.31510204 | 2.90650407 | 6.5487805 |

|            |                   |                  |                  |                  |               |             |            |            |           |
|------------|-------------------|------------------|------------------|------------------|---------------|-------------|------------|------------|-----------|
| A_55_P2083 | 18 Detected       | 18.3 Not Detect  | 19.5 Detected    | 10.5 Not Detect  | Radil         | 0.583333333 | 1.08333333 | 0.57377049 | 1.0655738 |
| A_55_P2182 | 885.8 Detected    | 606.1 Detected   | 376.9 Detected   | 516.6 Detected   | Maml3         | 0.583201626 | 0.42549108 | 0.8523346  | 0.6218446 |
| A_52_P6603 | 5708.1 Detected   | 4265.9 Detected  | 5331.9 Detected  | 3328.6 Detected  | Trmt6         | 0.583136245 | 0.93409366 | 0.78028083 | 1.2498887 |
| A_55_P2067 | 67.6 Detected     | 55.9 Detected    | 31.8 Detected    | 39.4 Not Detect  | Cd68          | 0.582840237 | 0.4704142  | 0.70483005 | 0.568873  |
| A_55_P2181 | 33.8 Detected     | 44.8 Detected    | 9 Not Detect     | 19.7 Not Detect  | Efn3          | 0.582840237 | 0.26627219 | 0.43973214 | 0.2008929 |
| A_55_P2051 | 338.8 Detected    | 301 Detected     | 254.9 Detected   | 197.4 Detected   | Cbx1          | 0.582644628 | 0.75236128 | 0.65581395 | 0.8468439 |
| A_55_P2412 | 41.2 Detected     | 9.3 Not Detect   | 27.8 Detected    | 24 Not Detect    | E130018N17Rik | 0.582524272 | 0.67475728 | 2.58064516 | 2.9892473 |
| A_55_P2266 | 47.4 Detected     | 26.3 Detected    | 25 Detected      | 27.6 Not Detect  | B930095M22Rik | 0.582278481 | 0.52742616 | 1.04942966 | 0.9505703 |
| A_51_P2791 | 123337.4 Detected | 28181.7 Detected | 61703.5 Detected | 71789 Detected   | Ptgs1         | 0.582053781 | 0.50028215 | 2.5473623  | 2.1894882 |
| A_51_P1390 | 24.4 Detected     | 24.4 Detected    | 17 Not Detect    | 14.2 Not Detect  | 1700122O11Rik | 0.581967213 | 0.69672131 | 0.58196721 | 0.6967213 |
| A_55_P2118 | 1473.3 Detected   | 790 Detected     | 929.8 Detected   | 857.4 Detected   | Ninl          | 0.581958868 | 0.63110025 | 1.08531646 | 1.176962  |
| A_51_P5115 | 15.3 Detected     | 12.3 Not Detect  | 15.2 Not Detect  | 8.9 Not Detect   | Stk33         | 0.581699346 | 0.99346405 | 0.72357724 | 1.2357724 |
| A_55_P1964 | 24.6 Detected     | 25.3 Detected    | 13.7 Not Detect  | 14.3 Not Detect  | Gdpd2         | 0.581300813 | 0.55691057 | 0.56521739 | 0.541502  |
| A_51_P3868 | 16 Detected       | 27.6 Detected    | 3.3 Not Detect   | 9.3 Not Detect   | Mfsd7c        | 0.58125     | 0.20625    | 0.33695652 | 0.1195652 |
| A_52_P5589 | 691.8 Detected    | 488.3 Detected   | 348.9 Detected   | 402.1 Detected   | Rab3gap1      | 0.581237352 | 0.50433651 | 0.82346918 | 0.7145198 |
| A_55_P2036 | 16.7 Detected     | 9.3 Not Detect   | 10.2 Not Detect  | 9.7 Not Detect   | Ckap4         | 0.580838323 | 0.61077844 | 1.04301075 | 1.0967742 |
| A_55_P1955 | 89.2 Detected     | 54.4 Detected    | 39.9 Detected    | 51.8 Detected    | Gm10204       | 0.580717489 | 0.44730942 | 0.95220588 | 0.7334559 |
| A_55_P1963 | 114 Detected      | 145.9 Detected   | 85.3 Detected    | 66.2 Detected    | Hctr1         | 0.580701754 | 0.74824561 | 0.45373544 | 0.584647  |
| A_55_P2150 | 344.3 Detected    | 270.6 Detected   | 208.7 Detected   | 199.9 Detected   | Pgm211        | 0.580598315 | 0.60615742 | 0.73872875 | 0.7712491 |
| A_55_P1995 | 1201.2 Detected   | 591.1 Detected   | 679.9 Detected   | 696.9 Detected   | Gm13251       | 0.58016983  | 0.56601732 | 1.17898833 | 1.1502284 |
| A_51_P4643 | 16.9 Detected     | 26 Detected      | 11.1 Not Detect  | 9.8 Not Detect   | Hspb8         | 0.579881657 | 0.65680473 | 0.37692308 | 0.4269231 |
| A_51_P1840 | 9562.4 Detected   | 8118.4 Detected  | 7586.5 Detected  | 5544.8 Detected  | Tsen15        | 0.57985443  | 0.79336777 | 0.68299172 | 0.9344822 |
| A_55_P2178 | 516 Detected      | 222.5 Detected   | 537.8 Detected   | 299.2 Detected   | Mc3r          | 0.579844961 | 1.04224806 | 1.3447191  | 2.4170787 |
| A_51_P2086 | 18151.2 Detected  | 13527.5 Detected | 13396.3 Detected | 10523.5 Detected | Chtf18        | 0.579768831 | 0.73803936 | 0.77793384 | 0.9903012 |
| A_55_P2115 | 20.7 Detected     | 17.9 Detected    | 23.4 Detected    | 12 Not Detect    | Gm11437       | 0.579710145 | 1.13043478 | 0.67039106 | 1.3072626 |
| A_52_P9984 | 189.3 Detected    | 206.4 Detected   | 43 Detected      | 109.7 Detected   | Pik3cd        | 0.579503434 | 0.22715267 | 0.53149225 | 0.2083333 |
| A_51_P3218 | 6806.1 Detected   | 2373.8 Detected  | 1872.6 Detected  | 3942 Detected    | Cmtm3         | 0.579186318 | 0.27513554 | 1.66062853 | 0.7888617 |
| A_55_P1995 | 555.1 Detected    | 342.5 Detected   | 635.5 Detected   | 321.5 Detected   | Gm14326       | 0.579174923 | 1.14483877 | 0.93868613 | 1.8554745 |
| A_55_P2076 | 17.1 Detected     | 5.7 Not Detect   | 8.6 Not Detect   | 9.9 Not Detect   | Megf6         | 0.578947368 | 0.50292398 | 1.73684211 | 1.5087719 |
| A_55_P2050 | 250.3 Detected    | 121 Detected     | 171.4 Detected   | 144.9 Detected   | Agps          | 0.578905314 | 0.68477827 | 1.19752066 | 1.4165289 |
| A_55_P2033 | 1158.6 Detected   | 482.9 Detected   | 743.9 Detected   | 670.7 Detected   | Pax3          | 0.578888313 | 0.64206801 | 1.38890039 | 1.5404846 |
| A_52_P5258 | 2546 Detected     | 1856.3 Detected  | 2375.2 Detected  | 1472.7 Detected  | Trmt6         | 0.578436764 | 0.93291438 | 0.79335237 | 1.2795346 |
| A_55_P2059 | 296 Detected      | 189.3 Detected   | 167.3 Detected   | 171.2 Detected   | Gm11938       | 0.578378378 | 0.5652027  | 0.90438457 | 0.8837824 |
| A_55_P2143 | 1005.8 Detected   | 749.2 Detected   | 920.2 Detected   | 581.6 Detected   | Ddx39b        | 0.578246172 | 0.91489362 | 0.77629471 | 1.2282435 |
| A_55_P2266 | 4298.7 Detected   | 3942.3 Detected  | 2755.6 Detected  | 2485.4 Detected  | Kirrel        | 0.578174797 | 0.64103101 | 0.63044416 | 0.6989828 |
| A_55_P2041 | 109.5 Detected    | 83.2 Detected    | 73.5 Detected    | 63.3 Detected    | Ty5           | 0.578082192 | 0.67123288 | 0.76081731 | 0.8834135 |
| A_55_P2049 | 23.7 Detected     | 8.7 Not Detect   | 26.4 Detected    | 13.7 Not Detect  | Rnf150        | 0.578059072 | 1.11392405 | 1.57471264 | 3.0344828 |
| A_51_P3168 | 1083.1 Detected   | 794.6 Detected   | 829.5 Detected   | 625.8 Detected   | Wdr60         | 0.577785985 | 0.76585726 | 0.78756607 | 1.0439215 |
| A_51_P4774 | 16.1 Detected     | 6.7 Not Detect   | 5.8 Not Detect   | 9.3 Not Detect   | Grid2         | 0.577639752 | 0.36024845 | 1.3880597  | 0.8656716 |
| A_55_P2154 | 19965.6 Detected  | 17546.4 Detected | 22533.4 Detected | 11532.3 Detected | Cd320         | 0.577608487 | 1.12861121 | 0.65724593 | 1.2842178 |

|            |                  |                  |                  |                  |               |             |            |            |           |
|------------|------------------|------------------|------------------|------------------|---------------|-------------|------------|------------|-----------|
| A_55_P2002 | 35.5 Detected    | 38 Detected      | 24.3 Detected    | 20.5 Not Detect  | Phf8          | 0.577464789 | 0.68450704 | 0.53947368 | 0.6394737 |
| A_52_P7893 | 22 Detected      | 5 Not Detect     | 22.9 Detected    | 12.7 Not Detect  | D6Erd527e     | 0.577272727 | 1.04090909 | 2.54       | 4.58      |
| A_55_P2271 | 14.9 Detected    | 11 Not Detect    | 8.9 Not Detect   | 8.6 Not Detect   | Dep1          | 0.577181208 | 0.59731544 | 0.78181818 | 0.8090909 |
| A_55_P1961 | 15.6 Detected    | 5.9 Not Detect   | 3.2 Not Detect   | 9 Not Detect     | Tcl1b5        | 0.576923077 | 0.20512821 | 1.52542373 | 0.5423729 |
| A_51_P2751 | 1946.4 Detected  | 1575.2 Detected  | 921.3 Detected   | 1122.6 Detected  | Psd3          | 0.57675709  | 0.47333539 | 0.71267141 | 0.5848781 |
| A_55_P2065 | 202 Detected     | 297.2 Detected   | 148.9 Detected   | 116.5 Detected   | Cygb          | 0.576732673 | 0.73712871 | 0.39199192 | 0.5010094 |
| A_55_P2040 | 20222.8 Detected | 10296.4 Detected | 14937.8 Detected | 11658.3 Detected | Gid8          | 0.576492869 | 0.73866131 | 1.13226953 | 1.4507789 |
| A_55_P2015 | 31.4 Detected    | 27.9 Detected    | 42.3 Detected    | 18.1 Not Detect  | Mtmr3         | 0.576433121 | 1.34713376 | 0.64874552 | 1.516129  |
| A_55_P2170 | 14968.1 Detected | 10978.9 Detected | 12243.5 Detected | 8626.8 Detected  | Pkig          | 0.576345695 | 0.81797289 | 0.78576178 | 1.1151846 |
| A_55_P2038 | 26.9 Detected    | 17.8 Detected    | 23.4 Detected    | 15.5 Not Detect  | Sowaha        | 0.576208178 | 0.86988848 | 0.87078652 | 1.3146067 |
| A_52_P2018 | 639.4 Detected   | 200.2 Detected   | 524.6 Detected   | 368.4 Detected   | Nanos1        | 0.576165155 | 0.82045668 | 1.84015984 | 2.6203796 |
| A_51_P1815 | 40.1 Detected    | 29.3 Detected    | 22.1 Detected    | 23.1 Not Detect  | 4933402N22Rik | 0.57605985  | 0.55112219 | 0.7883959  | 0.7542662 |
| A_55_P2143 | 25639.4 Detected | 17804.9 Detected | 5097.9 Detected  | 14762.5 Detected | Fstl1         | 0.575774004 | 0.19883071 | 0.82912569 | 0.2863201 |
| A_52_P2521 | 1822.2 Detected  | 1220.6 Detected  | 1900.1 Detected  | 1049.1 Detected  | Nfs1          | 0.575732631 | 1.04275052 | 0.85949533 | 1.5566934 |
| A_52_P4609 | 751.6 Detected   | 472.8 Detected   | 529.9 Detected   | 432.7 Detected   | Crem          | 0.575705162 | 0.70502927 | 0.91518613 | 1.1207699 |
| A_55_P1956 | 17.2 Detected    | 14.6 Not Detect  | 7.8 Not Detect   | 9.9 Not Detect   | Ctcf1         | 0.575581395 | 0.45348837 | 0.67808219 | 0.5342466 |
| A_55_P2200 | 34.4 Detected    | 34.2 Detected    | 18.3 Not Detect  | 19.8 Not Detect  | 4930447122Rik | 0.575581395 | 0.53197674 | 0.57894737 | 0.5350877 |
| A_55_P1968 | 383.7 Detected   | 642.7 Detected   | 164.8 Detected   | 220.8 Detected   | Rapgef5       | 0.57544957  | 0.42950222 | 0.34355065 | 0.2564182 |
| A_51_P4634 | 686.5 Detected   | 360.7 Detected   | 388.8 Detected   | 395 Detected     | Acs1          | 0.575382374 | 0.56635106 | 1.09509287 | 1.0779041 |
| A_55_P2026 | 18.6 Detected    | 16.3 Not Detect  | 11.5 Not Detect  | 10.7 Not Detect  | 1700091H14Rik | 0.575268817 | 0.61827957 | 0.65644172 | 0.7055215 |
| A_55_P2419 | 30.6 Detected    | 25.6 Detected    | 41.5 Detected    | 17.6 Not Detect  | Snhg9         | 0.575163399 | 1.35620915 | 0.6875     | 1.6210938 |
| A_55_P2038 | 21981.9 Detected | 18529.7 Detected | 18988.8 Detected | 12641.7 Detected | Slc29a1       | 0.575095874 | 0.86383798 | 0.68223986 | 1.0247764 |
| A_55_P1971 | 46567.9 Detected | 46888 Detected   | 15095.2 Detected | 26777 Detected   | F3            | 0.575009824 | 0.32415462 | 0.57108429 | 0.3219416 |
| A_55_P1991 | 40425.7 Detected | 29039.7 Detected | 22273.2 Detected | 23241.6 Detected | Ptprs         | 0.574921399 | 0.55096634 | 0.80033885 | 0.7669914 |
| A_51_P1689 | 1124.2 Detected  | 1114.9 Detected  | 1502 Detected    | 646.3 Detected   | Ptar1         | 0.574897705 | 1.3360612  | 0.57969325 | 1.347206  |
| A_51_P2730 | 16.7 Detected    | 9.4 Not Detect   | 12.4 Not Detect  | 9.6 Not Detect   | Actl7a        | 0.574850299 | 0.74251497 | 1.0212766  | 1.3191489 |
| A_52_P2325 | 2700.2 Detected  | 3253.7 Detected  | 1499.4 Detected  | 1552.1 Detected  | Dyrk3         | 0.574809273 | 0.5552922  | 0.47702615 | 0.4608292 |
| A_51_P2084 | 190.5 Detected   | 126.5 Detected   | 150.4 Detected   | 109.5 Detected   | Ston1         | 0.57480315  | 0.78950131 | 0.86561265 | 1.1889328 |
| A_51_P1794 | 106.3 Detected   | 89 Detected      | 55.2 Detected    | 61.1 Detected    | Eid3          | 0.574788335 | 0.51928504 | 0.68651685 | 0.6202247 |
| A_55_P2009 | 198 Detected     | 187.9 Detected   | 117.7 Detected   | 113.8 Detected   | Zic1          | 0.574747475 | 0.59444444 | 0.6056413  | 0.626397  |
| A_55_P2048 | 14.8 Detected    | 15.9 Detected    | 9.4 Not Detect   | 8.5 Not Detect   | Rbmy          | 0.574324324 | 0.63513514 | 0.53459119 | 0.591195  |
| A_55_P2057 | 88.3 Detected    | 13.7 Not Detect  | 47.5 Detected    | 50.7 Detected    | Ugt1a6a       | 0.574178935 | 0.53793884 | 3.70072993 | 3.4671533 |
| A_55_P2113 | 1379 Detected    | 979 Detected     | 1108.2 Detected  | 791.6 Detected   | Whsc1         | 0.574039159 | 0.80362582 | 0.80858018 | 1.1319714 |
| A_52_P6817 | 2945 Detected    | 2098.2 Detected  | 2554.3 Detected  | 1690.3 Detected  | Zfp955b       | 0.573955857 | 0.86733447 | 0.80559527 | 1.2173768 |
| A_55_P2118 | 26609.4 Detected | 18636 Detected   | 19251.7 Detected | 15264.2 Detected | Fam110a       | 0.573639391 | 0.72349245 | 0.81907062 | 1.0330382 |
| A_55_P2111 | 616.8 Detected   | 492.3 Detected   | 346.5 Detected   | 353.8 Detected   | Ppp1r18       | 0.573605707 | 0.56177043 | 0.71866748 | 0.7038391 |
| A_55_P2137 | 57.2 Detected    | 46.9 Detected    | 31.8 Detected    | 32.8 Not Detect  | Hhpl1         | 0.573426573 | 0.55594406 | 0.69936034 | 0.6780384 |
| A_55_P1958 | 31212.5 Detected | 18756.7 Detected | 23534.9 Detected | 17894.8 Detected | Rnf114        | 0.573321586 | 0.75402163 | 0.95404842 | 1.2547463 |
| A_51_P1237 | 11988.1 Detected | 10533.1 Detected | 10799.5 Detected | 6872.1 Detected  | Dus3l         | 0.573243466 | 0.90085168 | 0.65242901 | 1.0252917 |
| A_55_P2035 | 24830.5 Detected | 14378.6 Detected | 13400.1 Detected | 14229.1 Detected | Fitm2         | 0.573049274 | 0.53966291 | 0.9896026  | 0.9319475 |

|            |         |          |         |            |         |            |         |            |               |             |            |            |           |
|------------|---------|----------|---------|------------|---------|------------|---------|------------|---------------|-------------|------------|------------|-----------|
| A_51_P5157 | 119.2   | Detected | 88.9    | Detected   | 121.3   | Detected   | 68.3    | Detected   | Zfp516        | 0.572986577 | 1.01761745 | 0.76827897 | 1.3644544 |
| A_51_P2871 | 91.5    | Detected | 409.7   | Detected   | 2065.2  | Detected   | 52.4    | Detected   | Cdh16         | 0.572677596 | 22.5704918 | 0.12789846 | 5.0407615 |
| A_55_P2028 | 4060    | Detected | 1393.2  | Detected   | 2161.5  | Detected   | 2324.9  | Detected   | Pawr          | 0.572635468 | 0.53238916 | 1.66874821 | 1.5514643 |
| A_55_P2075 | 27641.1 | Detected | 15200.1 | Detected   | 18895.9 | Detected   | 15827.8 | Detected   | Cpne1         | 0.572618311 | 0.68361606 | 1.04129578 | 1.2431431 |
| A_55_P2126 | 74.6    | Detected | 53.8    | Detected   | 33      | Detected   | 42.7    | Not Detect | Gm5800        | 0.572386059 | 0.44235925 | 0.7936803  | 0.6133829 |
| A_52_P2147 | 15.2    | Detected | 13.4    | Not Detect | 9.8     | Not Detect | 8.7     | Not Detect | Ankrd45       | 0.572368421 | 0.64473684 | 0.64925373 | 0.7313433 |
| A_52_P5199 | 18      | Detected | 20.8    | Detected   | 9.6     | Not Detect | 10.3    | Not Detect | Kcnc3         | 0.572222222 | 0.53333333 | 0.49519231 | 0.4615385 |
| A_55_P1969 | 45.1    | Detected | 32.9    | Detected   | 17.2    | Detected   | 25.8    | Not Detect | Hivep3        | 0.572062084 | 0.38137472 | 0.78419453 | 0.5227964 |
| A_55_P2008 | 479.7   | Detected | 311.8   | Detected   | 361.8   | Detected   | 274.4   | Detected   | Zfp30         | 0.572024182 | 0.75422139 | 0.88005131 | 1.1603592 |
| A_52_P4618 | 860.8   | Detected | 642.6   | Detected   | 843.3   | Detected   | 492.3   | Detected   | Rcbtb1        | 0.571909851 | 0.97967007 | 0.76610644 | 1.3123249 |
| A_55_P2023 | 1041.6  | Detected | 873.6   | Detected   | 562.3   | Detected   | 595.7   | Detected   | Thada         | 0.571908602 | 0.53984255 | 0.68189103 | 0.6436584 |
| A_55_P2081 | 910.5   | Detected | 718     | Detected   | 719.9   | Detected   | 520.7   | Detected   | Asb7          | 0.57188358  | 0.79066447 | 0.72520891 | 1.0026462 |
| A_55_P1972 | 6974    | Detected | 4907.5  | Detected   | 4858.3  | Detected   | 3987.5  | Detected   | Tor1b         | 0.571766562 | 0.69663034 | 0.81253184 | 0.9899745 |
| A_52_P4644 | 3230.7  | Detected | 2196.7  | Detected   | 2369.2  | Detected   | 1846.8  | Detected   | Trp53bp1      | 0.571640821 | 0.73333952 | 0.84071562 | 1.0785269 |
| A_55_P2185 | 18.2    | Detected | 7.1     | Not Detect | 3.7     | Not Detect | 10.4    | Not Detect | Asic4         | 0.571428571 | 0.2032967  | 1.46478873 | 0.5211268 |
| A_55_P2068 | 33.8    | Detected | 25.6    | Detected   | 21.6    | Detected   | 19.3    | Not Detect | Polr1b        | 0.571005917 | 0.63905325 | 0.75390625 | 0.84375   |
| A_51_P2827 | 293.6   | Detected | 179.4   | Detected   | 458.1   | Detected   | 167.6   | Detected   | Per2          | 0.570844687 | 1.5602861  | 0.9342252  | 2.5535117 |
| A_55_P2146 | 23.3    | Detected | 10.6    | Not Detect | 12.9    | Not Detect | 13.3    | Not Detect | Zcchc18       | 0.570815451 | 0.55364807 | 1.25471698 | 1.2169811 |
| A_52_P7994 | 5940.4  | Detected | 4248    | Detected   | 4309.9  | Detected   | 3390.3  | Detected   | Ndst1         | 0.570719143 | 0.72552353 | 0.79809322 | 1.0145716 |
| A_55_P2041 | 203.5   | Detected | 90.5    | Detected   | 102.3   | Detected   | 116.1   | Detected   | Gna12         | 0.570515971 | 0.5027027  | 1.28287293 | 1.1303867 |
| A_66_P1182 | 123     | Detected | 76.3    | Detected   | 78.3    | Detected   | 70.1    | Detected   | Spdya         | 0.569918699 | 0.63658537 | 0.91874181 | 1.0262123 |
| A_55_P2105 | 26.5    | Detected | 20.3    | Detected   | 29.8    | Detected   | 15.1    | Not Detect | Bpifa3        | 0.569811321 | 1.1245283  | 0.74384236 | 1.4679803 |
| A_55_P2070 | 16.5    | Detected | 23.4    | Detected   | 5.9     | Not Detect | 9.4     | Not Detect | Olfcr281      | 0.56969697  | 0.35757576 | 0.4017094  | 0.2521368 |
| A_51_P4189 | 15.1    | Detected | 67.3    | Detected   | 17.8    | Detected   | 8.6     | Not Detect | Prss2         | 0.569536424 | 1.17880795 | 0.12778603 | 0.2644874 |
| A_51_P1616 | 14.4    | Detected | 10.9    | Not Detect | 3       | Not Detect | 8.2     | Not Detect | Kng2          | 0.569444444 | 0.20833333 | 0.75229358 | 0.2752294 |
| A_55_P2102 | 2505.5  | Detected | 1687.3  | Detected   | 1536    | Detected   | 1426.7  | Detected   | Lime1         | 0.56942726  | 0.61305129 | 0.84555207 | 0.9103301 |
| A_51_P2186 | 25.3    | Detected | 28.3    | Detected   | 13.6    | Not Detect | 14.4    | Not Detect | Tex26         | 0.56916996  | 0.53754941 | 0.50883392 | 0.4805654 |
| A_66_P1234 | 447.6   | Detected | 396.9   | Detected   | 381.5   | Detected   | 254.7   | Detected   | 4930447J18Rik | 0.569034853 | 0.8523235  | 0.64172336 | 0.9611993 |
| A_55_P2310 | 912.6   | Detected | 531.9   | Detected   | 561.1   | Detected   | 519.2   | Detected   | 2900056M20Rik | 0.568923954 | 0.61483673 | 0.97612333 | 1.0548975 |
| A_55_P2133 | 16      | Detected | 13.8    | Not Detect | 12.5    | Not Detect | 9.1     | Not Detect | 1700023F06Rik | 0.56875     | 0.78125    | 0.65942029 | 0.9057971 |
| A_55_P2138 | 109.9   | Detected | 121.3   | Detected   | 81.3    | Detected   | 62.5    | Detected   | Nab2          | 0.568698817 | 0.73976342 | 0.51525144 | 0.6702391 |
| A_55_P2051 | 34382   | Detected | 23052.4 | Detected   | 32438.9 | Detected   | 19551.1 | Detected   | Axl           | 0.568643476 | 0.94348496 | 0.8481156  | 1.407181  |
| A_55_P2018 | 31456.8 | Detected | 23628.5 | Detected   | 21982.3 | Detected   | 17883.4 | Detected   | Hdac7         | 0.56850665  | 0.69880916 | 0.75685719 | 0.9303299 |
| A_51_P3625 | 218.5   | Detected | 165.1   | Detected   | 58.1    | Detected   | 124.2   | Detected   | Syde2         | 0.568421053 | 0.26590389 | 0.75227135 | 0.3519079 |
| A_55_P2025 | 17.6    | Detected | 10.7    | Not Detect | 22.1    | Detected   | 10      | Not Detect | Zfp780b       | 0.568181818 | 1.25568182 | 0.93457944 | 2.0654206 |
| A_51_P4490 | 8988.5  | Detected | 6220    | Detected   | 6811.3  | Detected   | 5106.8  | Detected   | Cndp2         | 0.568148189 | 0.75777938 | 0.82102894 | 1.0950643 |
| A_52_P2769 | 10420.9 | Detected | 7538.2  | Detected   | 8164.2  | Detected   | 5919.3  | Detected   | Dnajb6        | 0.568021956 | 0.78344481 | 0.78524051 | 1.0830437 |
| A_52_P1084 | 37331   | Detected | 20316.7 | Detected   | 25106.3 | Detected   | 21202.5 | Detected   | Glis2         | 0.567959605 | 0.67253221 | 1.0435996  | 1.2357469 |
| A_55_P2028 | 15.5    | Detected | 6.9     | Not Detect | 3.2     | Not Detect | 8.8     | Not Detect | Abcb11        | 0.567741935 | 0.20645161 | 1.27536232 | 0.4637681 |
| A_52_P2568 | 500.1   | Detected | 317.5   | Detected   | 377.8   | Detected   | 283.8   | Detected   | Zik1          | 0.567486503 | 0.75544891 | 0.89385827 | 1.1899213 |

|            |          |          |          |            |          |            |          |            |               |             |            |            |           |
|------------|----------|----------|----------|------------|----------|------------|----------|------------|---------------|-------------|------------|------------|-----------|
| A_55_P2066 | 3766.7   | Detected | 1123.2   | Detected   | 1159.6   | Detected   | 2137.1   | Detected   | Gpr137b-ps    | 0.56736666  | 0.30785568 | 1.90268875 | 1.0324074 |
| A_55_P2110 | 50.6     | Detected | 24.1     | Detected   | 16.6     | Not Detect | 28.7     | Not Detect | Fnbp1         | 0.567193676 | 0.32806324 | 1.19087137 | 0.6887967 |
| A_55_P2072 | 29.8     | Detected | 24.7     | Detected   | 25.2     | Detected   | 16.9     | Not Detect | Olf616        | 0.567114094 | 0.84563758 | 0.68421053 | 1.0202429 |
| A_55_P2138 | 18       | Detected | 18.9     | Detected   | 14.9     | Not Detect | 10.2     | Not Detect | Psd3          | 0.566666667 | 0.82777778 | 0.53968254 | 0.7883598 |
| A_51_P4723 | 17.3     | Detected | 15.2     | Not Detect | 13       | Not Detect | 9.8      | Not Detect | 4930426D05Rik | 0.566473988 | 0.75144509 | 0.64473684 | 0.8552632 |
| A_55_P2103 | 200677.2 | Detected | 146926.8 | Detected   | 144645.5 | Detected   | 113668.3 | Detected   | Psmc3         | 0.56642359  | 0.72078692 | 0.77363898 | 0.9844732 |
| A_66_P1220 | 137      | Detected | 86.6     | Detected   | 138.9    | Detected   | 77.6     | Detected   | 4833418N02Rik | 0.566423358 | 1.01386861 | 0.8960739  | 1.6039261 |
| A_51_P1494 | 111.1    | Detected | 70.2     | Detected   | 179.5    | Detected   | 62.9     | Detected   | Gng13         | 0.566156616 | 1.61566157 | 0.8960114  | 2.5569801 |
| A_51_P3793 | 1585.2   | Detected | 1067.8   | Detected   | 1429.5   | Detected   | 897.4    | Detected   | Entpd6        | 0.566111532 | 0.90177896 | 0.84041955 | 1.3387338 |
| A_55_P2022 | 121.1    | Detected | 52.6     | Detected   | 51.7     | Detected   | 68.5     | Detected   | Arvcf         | 0.565648225 | 0.4269199  | 1.30228137 | 0.9828897 |
| A_66_P1314 | 73.9     | Detected | 49.7     | Detected   | 43.7     | Detected   | 41.8     | Detected   | Gm10099       | 0.565629229 | 0.59133965 | 0.84104628 | 0.8792757 |
| A_52_P4404 | 1111.7   | Detected | 894.7    | Detected   | 801.3    | Detected   | 628.7    | Detected   | Polr1a        | 0.565530269 | 0.72078798 | 0.70269364 | 0.8956075 |
| A_52_P6016 | 11957.1  | Detected | 7565.6   | Detected   | 5774.2   | Detected   | 6760.4   | Detected   | Abcc1         | 0.565387929 | 0.48290974 | 0.8935709  | 0.7632177 |
| A_55_P1997 | 16.1     | Detected | 3.8      | Not Detect | 5.6      | Not Detect | 9.1      | Not Detect | Gm5416        | 0.565217391 | 0.34782609 | 2.39473684 | 1.4736842 |
| A_51_P4486 | 1216.9   | Detected | 560.2    | Detected   | 1154.3   | Detected   | 687.7    | Detected   | Slc16a10      | 0.565124497 | 0.94855781 | 1.22759729 | 2.0605141 |
| A_55_P2111 | 38.4     | Detected | 46.9     | Detected   | 51.1     | Detected   | 21.7     | Not Detect | Iglv1         | 0.565104167 | 1.33072917 | 0.46268657 | 1.0895522 |
| A_55_P1996 | 26.9     | Detected | 10.1     | Not Detect | 3.5      | Not Detect | 15.2     | Not Detect | Lphn1         | 0.565055762 | 0.13011152 | 1.5049505  | 0.3465347 |
| A_52_P2620 | 364.6    | Detected | 274.9    | Detected   | 259.9    | Detected   | 205.9    | Detected   | Ccdc93        | 0.56472847  | 0.71283598 | 0.74899964 | 0.9454347 |
| A_55_P2002 | 2548.4   | Detected | 1383.2   | Detected   | 2311.3   | Detected   | 1439.1   | Detected   | Pfkfb1        | 0.564707267 | 0.90696123 | 1.04041353 | 1.6709803 |
| A_55_P2278 | 90.7     | Detected | 43       | Detected   | 22.4     | Detected   | 51.2     | Not Detect | 5430420F09Rik | 0.564498346 | 0.24696803 | 1.19069767 | 0.5209302 |
| A_51_P3821 | 26127    | Detected | 19901.2  | Detected   | 31242.7  | Detected   | 14744.9  | Detected   | Procr         | 0.564354882 | 1.19580128 | 0.74090507 | 1.5698903 |
| A_55_P2022 | 33.5     | Detected | 30.5     | Detected   | 29.4     | Detected   | 18.9     | Not Detect | Hpse2         | 0.564179104 | 0.87761194 | 0.61967213 | 0.9639344 |
| A_52_P4975 | 2825.4   | Detected | 1301.6   | Detected   | 1976.4   | Detected   | 1593.4   | Detected   | Wipi1         | 0.563955546 | 0.69951157 | 1.22418562 | 1.5184388 |
| A_51_P1006 | 108.7    | Detected | 75.7     | Detected   | 89       | Detected   | 61.3     | Detected   | Apon          | 0.563937443 | 0.81876725 | 0.80977543 | 1.1756935 |
| A_55_P1955 | 18358.8  | Detected | 17308.1  | Detected   | 11840    | Detected   | 10350.9  | Detected   | Extl3         | 0.56381136  | 0.64492233 | 0.59803791 | 0.6840728 |
| A_55_P1993 | 3421.1   | Detected | 1972.6   | Detected   | 3175.9   | Detected   | 1926.7   | Detected   | Sh2b3         | 0.563181433 | 0.92832715 | 0.97673122 | 1.6100071 |
| A_55_P2315 | 17.6     | Detected | 13.5     | Not Detect | 12.2     | Not Detect | 9.9      | Not Detect | 4930590A17Rik | 0.5625      | 0.69318182 | 0.73333333 | 0.9037037 |
| A_55_P2164 | 16       | Detected | 12.8     | Not Detect | 3.2      | Not Detect | 9        | Not Detect | Ptn           | 0.5625      | 0.2        | 0.703125   | 0.25      |
| A_55_P1971 | 2507.6   | Detected | 1377.7   | Detected   | 1793.8   | Detected   | 1410.4   | Detected   | Csnk2a1       | 0.562450152 | 0.71534535 | 1.02373521 | 1.3020251 |
| A_55_P2094 | 3966     | Detected | 3456.9   | Detected   | 3092.7   | Detected   | 2230.5   | Detected   | Fmnl3         | 0.562405446 | 0.77980333 | 0.64523128 | 0.8946455 |
| A_52_P1354 | 782.2    | Detected | 398.1    | Detected   | 437.2    | Detected   | 439.9    | Detected   | Socs6         | 0.562388136 | 0.55893633 | 1.10499874 | 1.0982165 |
| A_52_P3720 | 241.3    | Detected | 153.2    | Detected   | 199.1    | Detected   | 135.7    | Detected   | Zfp119a       | 0.562370493 | 0.82511397 | 0.88577023 | 1.2996084 |
| A_51_P2464 | 3060.5   | Detected | 1848.3   | Detected   | 2592.9   | Detected   | 1721     | Detected   | Pbx2          | 0.562326417 | 0.84721451 | 0.9311259  | 1.4028567 |
| A_52_P4992 | 686.9    | Detected | 549.6    | Detected   | 737.8    | Detected   | 386.2    | Detected   | Tbl2          | 0.562236133 | 1.07410103 | 0.70269287 | 1.3424309 |
| A_55_P2024 | 247.6    | Detected | 176.9    | Detected   | 3.3      | Not Detect | 139.2    | Detected   | Hoxb8         | 0.562197092 | 0.01332795 | 0.78688525 | 0.0186546 |
| A_55_P1976 | 1304.3   | Detected | 968.6    | Detected   | 742.3    | Detected   | 733.2    | Detected   | 11-Sep        | 0.562140612 | 0.56911753 | 0.75696882 | 0.7663638 |
| A_55_P2020 | 277.2    | Detected | 180.9    | Detected   | 230.5    | Detected   | 155.8    | Detected   | Wdr76         | 0.562049062 | 0.83152958 | 0.86124931 | 1.2741846 |
| A_55_P2013 | 105.9    | Detected | 62.4     | Detected   | 116.9    | Detected   | 59.5     | Detected   | LOC101055765  | 0.561850803 | 1.10387158 | 0.95352564 | 1.8733974 |
| A_55_P2001 | 18795.1  | Detected | 11974.1  | Detected   | 15356.4  | Detected   | 10557.6  | Detected   | Ube2e3        | 0.561720874 | 0.81704274 | 0.88170301 | 1.282468  |
| A_55_P1972 | 10282.1  | Detected | 9482     | Detected   | 5285     | Detected   | 5774.7   | Detected   | Elk3          | 0.561626516 | 0.51400006 | 0.60901709 | 0.5573719 |



|            |         |          |         |            |          |            |         |            |               |             |            |            |           |
|------------|---------|----------|---------|------------|----------|------------|---------|------------|---------------|-------------|------------|------------|-----------|
| A_51_P2898 | 2915.1  | Detected | 3289.9  | Detected   | 2211.4   | Detected   | 1636.9  | Detected   | Npnt          | 0.561524476 | 0.75860176 | 0.49755312 | 0.6721785 |
| A_55_P1995 | 1412.8  | Detected | 765     | Detected   | 832.8    | Detected   | 793.2   | Detected   | Gm13212       | 0.561438279 | 0.58946772 | 1.03686275 | 1.0886275 |
| A_51_P4652 | 45511.7 | Detected | 34255.7 | Detected   | 33292.9  | Detected   | 25546.8 | Detected   | Mcfd2         | 0.561323791 | 0.73152398 | 0.74576786 | 0.9718937 |
| A_55_P1997 | 40.8    | Detected | 23.7    | Detected   | 37.5     | Detected   | 22.9    | Not Detect | Nox1          | 0.56127451  | 0.91911765 | 0.96624473 | 1.5822785 |
| A_55_P2175 | 16.4    | Detected | 3.2     | Not Detect | 3.2      | Not Detect | 9.2     | Not Detect | Vmn2r35       | 0.56097561  | 0.19512195 | 2.875      | 1         |
| A_55_P1992 | 4750.6  | Detected | 1825.3  | Detected   | 4190.4   | Detected   | 2663.3  | Detected   | Pfkfb4        | 0.560623921 | 0.88207805 | 1.45910261 | 2.2957322 |
| A_55_P2002 | 578.3   | Detected | 572     | Detected   | 357.6    | Detected   | 324.2   | Detected   | Rabgap11      | 0.560608681 | 0.61836417 | 0.56678322 | 0.6251748 |
| A_55_P2129 | 165.6   | Detected | 84.2    | Detected   | 65.7     | Detected   | 92.8    | Detected   | E030047D23Rik | 0.560386473 | 0.39673913 | 1.10213777 | 0.780285  |
| A_55_P1987 | 448.9   | Detected | 237.3   | Detected   | 316.4    | Detected   | 251.5   | Detected   | Lsm14b        | 0.560258409 | 0.70483404 | 1.05983987 | 1.3333333 |
| A_55_P2066 | 5524.5  | Detected | 1591.2  | Detected   | 1742.1   | Detected   | 3094.7  | Detected   | Gpr137b       | 0.560177392 | 0.31534075 | 1.94488436 | 1.0948341 |
| A_55_P2109 | 22.5    | Detected | 31.9    | Detected   | 15.6     | Not Detect | 12.6    | Not Detect | AI504432      | 0.56        | 0.69333333 | 0.39498433 | 0.4890282 |
| A_55_P2173 | 268.8   | Detected | 277.4   | Detected   | 135.4    | Detected   | 150.5   | Detected   | Cdk5r1        | 0.559895833 | 0.50372024 | 0.54253785 | 0.4881038 |
| A_55_P1961 | 10632   | Detected | 9137.4  | Detected   | 8490.6   | Detected   | 5951.6  | Detected   | Vax2          | 0.559781791 | 0.79858916 | 0.65134502 | 0.929214  |
| A_51_P4561 | 25784.8 | Detected | 18759.1 | Detected   | 20883.5  | Detected   | 14429.6 | Detected   | Pdcd2         | 0.559616518 | 0.80991514 | 0.76920535 | 1.1132464 |
| A_51_P2895 | 20876.2 | Detected | 13654   | Detected   | 17411.5  | Detected   | 11682.6 | Detected   | Ube2e3        | 0.55961334  | 0.83403589 | 0.8556174  | 1.2751941 |
| A_52_P2830 | 1297.3  | Detected | 676     | Detected   | 850.7    | Detected   | 725.7   | Detected   | Slc5a3        | 0.559392585 | 0.65574655 | 1.07352071 | 1.258432  |
| A_52_P7060 | 1426.4  | Detected | 822.6   | Detected   | 764.9    | Detected   | 797.7   | Detected   | Mex3a         | 0.559240045 | 0.53624509 | 0.96973012 | 0.9298566 |
| A_55_P2029 | 889.5   | Detected | 282.9   | Detected   | 325.6    | Detected   | 497.4   | Detected   | Bmf           | 0.559190556 | 0.36604834 | 1.75821845 | 1.1509367 |
| A_55_P2030 | 20.4    | Detected | 33.4    | Detected   | 19.2     | Detected   | 11.4    | Not Detect | Tns1          | 0.558823529 | 0.94117647 | 0.34131737 | 0.5748503 |
| A_55_P1985 | 899.7   | Detected | 557.3   | Detected   | 674.9    | Detected   | 502.7   | Detected   | Acp2          | 0.558741803 | 0.75013894 | 0.90202763 | 1.2110174 |
| A_51_P2165 | 69.7    | Detected | 105     | Detected   | 3.3      | Not Detect | 38.9    | Not Detect | Trp63         | 0.558106169 | 0.04734577 | 0.37047619 | 0.0314286 |
| A_55_P2115 | 32786.2 | Detected | 20798.3 | Detected   | 25644.5  | Detected   | 18295.6 | Detected   | Slc20a1       | 0.558027463 | 0.7821736  | 0.87966805 | 1.2330094 |
| A_55_P2140 | 77733.8 | Detected | 26713.9 | Detected   | 101508.6 | Detected   | 43352.7 | Detected   | Creg1         | 0.557707201 | 1.30584894 | 1.62285177 | 3.799842  |
| A_55_P2046 | 15.6    | Detected | 16.5    | Detected   | 7.6      | Not Detect | 8.7     | Not Detect | Olfir560      | 0.557692308 | 0.48717949 | 0.52727273 | 0.4606061 |
| A_55_P1953 | 592.1   | Detected | 60.7    | Detected   | 4.6      | Not Detect | 330.2   | Detected   | Abca8b        | 0.557676068 | 0.00776896 | 5.4398682  | 0.0757825 |
| A_51_P3279 | 169.1   | Detected | 59.5    | Detected   | 148.7    | Detected   | 94.3    | Detected   | Rfx2          | 0.55765819  | 0.87936132 | 1.58487395 | 2.4991597 |
| A_66_P1383 | 1330.4  | Detected | 910.7   | Detected   | 968.3    | Detected   | 741.9   | Detected   | Cndp2         | 0.557651834 | 0.72782622 | 0.81464807 | 1.0632481 |
| A_55_P1966 | 361.4   | Detected | 252.2   | Detected   | 72.2     | Detected   | 201.5   | Detected   | Pdzd4         | 0.557553957 | 0.19977864 | 0.79896907 | 0.2862807 |
| A_51_P1969 | 17254.2 | Detected | 11616.5 | Detected   | 12644.6  | Detected   | 9619.5  | Detected   | Chaf1a        | 0.557516431 | 0.73284186 | 0.82808936 | 1.0885034 |
| A_55_P2012 | 1617.6  | Detected | 1027.2  | Detected   | 1291.7   | Detected   | 901.5   | Detected   | Rnf167        | 0.557307122 | 0.79852868 | 0.8776285  | 1.2574961 |
| A_66_P1348 | 28.9    | Detected | 28.5    | Detected   | 15.8     | Not Detect | 16.1    | Not Detect | Ap4e1         | 0.557093426 | 0.5467128  | 0.56491228 | 0.554386  |
| A_55_P2045 | 128     | Detected | 85.8    | Detected   | 75.3     | Detected   | 71.3    | Detected   | Rbms3         | 0.55703125  | 0.58828125 | 0.83100233 | 0.8776224 |
| A_55_P1982 | 9821.8  | Detected | 5104.5  | Detected   | 8791.7   | Detected   | 5470.4  | Detected   | Dnajc5        | 0.556965118 | 0.89512106 | 1.07168185 | 1.722343  |
| A_55_P2057 | 17.6    | Detected | 8.8     | Not Detect | 9.7      | Not Detect | 9.8     | Not Detect | Gas7          | 0.556818182 | 0.55113636 | 1.11363636 | 1.1022727 |
| A_55_P2075 | 2053.5  | Detected | 1924.3  | Detected   | 1984.7   | Detected   | 1143.2  | Detected   | Ttll4         | 0.556708059 | 0.96649623 | 0.59408616 | 1.031388  |
| A_51_P4379 | 5626.6  | Detected | 3814.4  | Detected   | 6560     | Detected   | 3132    | Detected   | Coa5          | 0.556641666 | 1.16589059 | 0.82109899 | 1.7197987 |
| A_55_P1957 | 7586.7  | Detected | 5927.2  | Detected   | 5410.6   | Detected   | 4222.8  | Detected   | Snx9          | 0.556605639 | 0.7131691  | 0.71244432 | 0.9128425 |
| A_55_P2473 | 29989.9 | Detected | 17458.2 | Detected   | 22249.1  | Detected   | 16692.4 | Detected   | Mapre1        | 0.556600722 | 0.74188644 | 0.95613523 | 1.2744212 |
| A_55_P2149 | 43.3    | Detected | 30.1    | Detected   | 26.6     | Detected   | 24.1    | Not Detect | Camk2a        | 0.556581986 | 0.61431871 | 0.80066445 | 0.8837209 |
| A_55_P1968 | 77.8    | Detected | 37.2    | Detected   | 30.1     | Detected   | 43.3    | Not Detect | Rere          | 0.55655527  | 0.38688946 | 1.16397849 | 0.8091398 |

|            |         |          |         |            |         |            |         |            |               |             |            |            |           |
|------------|---------|----------|---------|------------|---------|------------|---------|------------|---------------|-------------|------------|------------|-----------|
| A_52_P4674 | 39.9    | Detected | 164     | Detected   | 3.2     | Not Detect | 22.2    | Not Detect | Alox12        | 0.556390977 | 0.0802005  | 0.13536585 | 0.0195122 |
| A_55_P2043 | 3688.5  | Detected | 4476.5  | Detected   | 1389.8  | Detected   | 2051.4  | Detected   | Apol9a        | 0.556161041 | 0.37679273 | 0.4582598  | 0.3104658 |
| A_55_P2110 | 37.4    | Detected | 8.8     | Not Detect | 14.1    | Not Detect | 20.8    | Not Detect | Olf904        | 0.556149733 | 0.37700535 | 2.36363636 | 1.6022727 |
| A_51_P3696 | 20315.1 | Detected | 15709.4 | Detected   | 14376.2 | Detected   | 11294.1 | Detected   | Hat1          | 0.55594607  | 0.7076608  | 0.71893898 | 0.9151336 |
| A_51_P4235 | 628.7   | Detected | 244     | Detected   | 123.1   | Detected   | 349.5   | Detected   | Slfn2         | 0.555909019 | 0.19580086 | 1.43237705 | 0.5045082 |
| A_51_P3486 | 22567.9 | Detected | 14538.2 | Detected   | 15481   | Detected   | 12545.6 | Detected   | Spast         | 0.555904626 | 0.68597433 | 0.86294039 | 1.0648498 |
| A_55_P2034 | 347.5   | Detected | 185.4   | Detected   | 192.7   | Detected   | 193.1   | Detected   | Socs6         | 0.555683453 | 0.55453237 | 1.04153182 | 1.0393743 |
| A_51_P1755 | 476.4   | Detected | 144.8   | Detected   | 255.3   | Detected   | 264.7   | Detected   | Trp53inp1     | 0.555625525 | 0.53589421 | 1.82803867 | 1.7631215 |
| A_66_P1173 | 5439    | Detected | 3924.9  | Detected   | 3035    | Detected   | 3022    | Detected   | Rcn2          | 0.555616841 | 0.55800699 | 0.76995592 | 0.7732681 |
| A_55_P2133 | 226.6   | Detected | 212.6   | Detected   | 229     | Detected   | 125.9   | Detected   | Ppih          | 0.55560459  | 1.01059135 | 0.59219191 | 1.0771402 |
| A_55_P2151 | 18.9    | Detected | 167.8   | Detected   | 3.8     | Not Detect | 10.5    | Not Detect | Gml           | 0.555555556 | 0.2010582  | 0.06257449 | 0.022646  |
| A_52_P1641 | 4862.3  | Detected | 1954.7  | Detected   | 5696.9  | Detected   | 2699    | Detected   | Gpd1          | 0.555087099 | 1.17164716 | 1.38077454 | 2.9144626 |
| A_66_P1257 | 101.8   | Detected | 70.3    | Detected   | 48.5    | Detected   | 56.5    | Detected   | Gm4673        | 0.555009823 | 0.47642436 | 0.80369844 | 0.6899004 |
| A_55_P2141 | 18.2    | Detected | 13.9    | Not Detect | 8.7     | Not Detect | 10.1    | Not Detect | Gm16386       | 0.554945055 | 0.47802198 | 0.72661871 | 0.6258993 |
| A_52_P2548 | 24.7    | Detected | 42.2    | Detected   | 17.4    | Detected   | 13.7    | Not Detect | Spata4        | 0.55465587  | 0.70445344 | 0.32464455 | 0.4123223 |
| A_55_P2033 | 21.1    | Detected | 11.1    | Not Detect | 14.2    | Not Detect | 11.7    | Not Detect | 1300002K09Rik | 0.55450237  | 0.67298578 | 1.05405405 | 1.2792793 |
| A_51_P3157 | 155.1   | Detected | 48.8    | Detected   | 102.6   | Detected   | 86      | Detected   | Pax3          | 0.55448098  | 0.6615087  | 1.76229508 | 2.102459  |
| A_51_P3776 | 17.5    | Detected | 13.6    | Not Detect | 12.5    | Not Detect | 9.7     | Not Detect | 2900092C05Rik | 0.554285714 | 0.71428571 | 0.71323529 | 0.9191176 |
| A_52_P3686 | 76.7    | Detected | 100.5   | Detected   | 49      | Detected   | 42.5    | Not Detect | Zswim4        | 0.55410691  | 0.63885267 | 0.42288557 | 0.4875622 |
| A_55_P2025 | 1963    | Detected | 1321.2  | Detected   | 1161.8  | Detected   | 1087.4  | Detected   | Brpf3         | 0.553948039 | 0.59184921 | 0.82303966 | 0.8793521 |
| A_55_P2062 | 17.7    | Detected | 3.5     | Not Detect | 3.4     | Not Detect | 9.8     | Not Detect | Col12a1       | 0.553672316 | 0.1920904  | 2.8        | 0.9714286 |
| A_55_P2089 | 2143.5  | Detected | 1098.2  | Detected   | 1559.3  | Detected   | 1186    | Detected   | 2900097C17Rik | 0.553300676 | 0.7274551  | 1.07994901 | 1.4198689 |
| A_51_P3705 | 2504.6  | Detected | 1633.8  | Detected   | 1786.1  | Detected   | 1385.4  | Detected   | BC022687      | 0.553142218 | 0.71312784 | 0.84796181 | 1.0932183 |
| A_51_P4649 | 41.6    | Detected | 37.8    | Detected   | 19.1    | Detected   | 23      | Not Detect | Mefv          | 0.552884615 | 0.45913462 | 0.60846561 | 0.505291  |
| A_66_P1212 | 217.6   | Detected | 213.6   | Detected   | 352.7   | Detected   | 120.3   | Detected   | Tgif2         | 0.552849265 | 1.62086397 | 0.56320225 | 1.6512172 |
| A_55_P1993 | 570.4   | Detected | 532.9   | Detected   | 219.6   | Detected   | 315.3   | Detected   | Myo10         | 0.552769986 | 0.38499299 | 0.59166823 | 0.4120848 |
| A_52_P4862 | 37.3    | Detected | 31.6    | Detected   | 28.9    | Detected   | 20.6    | Not Detect | Zfp207        | 0.55227882  | 0.77479893 | 0.65189873 | 0.914557  |
| A_55_P2037 | 203.9   | Detected | 116.9   | Detected   | 132.9   | Detected   | 112.6   | Detected   | Zfp600        | 0.552231486 | 0.65179009 | 0.96321642 | 1.1368691 |
| A_51_P2576 | 2916.8  | Detected | 1893.8  | Detected   | 2135.3  | Detected   | 1610.5  | Detected   | Stau1         | 0.552146188 | 0.73206939 | 0.85040659 | 1.1275214 |
| A_52_P5022 | 153.6   | Detected | 155.4   | Detected   | 166.9   | Detected   | 84.8    | Detected   | 2810429I04Rik | 0.552083333 | 1.08658854 | 0.54568855 | 1.0740026 |
| A_51_P1443 | 237.3   | Detected | 170.9   | Detected   | 253.2   | Detected   | 131     | Detected   | Chn2          | 0.552043826 | 1.06700379 | 0.76653013 | 1.4815682 |
| A_55_P2057 | 34.6    | Detected | 24.9    | Detected   | 21.5    | Detected   | 19.1    | Not Detect | Gm3902        | 0.552023121 | 0.62138728 | 0.76706827 | 0.8634538 |
| A_51_P3355 | 18.3    | Detected | 7.7     | Not Detect | 7.8     | Not Detect | 10.1    | Not Detect | Slco1a4       | 0.551912568 | 0.42622951 | 1.31168831 | 1.012987  |
| A_55_P1989 | 702.9   | Detected | 558.8   | Detected   | 533.2   | Detected   | 387.9   | Detected   | Fam149b       | 0.551856594 | 0.75857163 | 0.69416607 | 0.9541875 |
| A_52_P4992 | 557.5   | Detected | 319.7   | Detected   | 493.6   | Detected   | 307.6   | Detected   | Zmym3         | 0.551748879 | 0.88538117 | 0.96215202 | 1.5439475 |
| A_52_P3632 | 2289.5  | Detected | 1833.8  | Detected   | 1303.4  | Detected   | 1263.1  | Detected   | Gcnt2         | 0.551692509 | 0.56929461 | 0.68878831 | 0.7107645 |
| A_51_P1379 | 16.5    | Detected | 13.9    | Not Detect | 13.2    | Not Detect | 9.1     | Not Detect | Slc17a7       | 0.551515152 | 0.8        | 0.65467626 | 0.9496403 |
| A_51_P4555 | 17.6    | Detected | 18.9    | Detected   | 12.5    | Not Detect | 9.7     | Not Detect | Bpifb2        | 0.551136364 | 0.71022727 | 0.51322751 | 0.6613757 |
| A_55_P2099 | 18995.2 | Detected | 15478.5 | Detected   | 17215.4 | Detected   | 10466.5 | Detected   | Slc12a2       | 0.551007623 | 0.90630264 | 0.67619601 | 1.1122137 |
| A_51_P1254 | 3805    | Detected | 1380.1  | Detected   | 440.7   | Detected   | 2096.4  | Detected   | Igf2r         | 0.550959264 | 0.11582129 | 1.51902036 | 0.3193247 |

|            |          |          |          |            |          |            |          |            |               |             |            |            |           |
|------------|----------|----------|----------|------------|----------|------------|----------|------------|---------------|-------------|------------|------------|-----------|
| A_55_P1953 | 208557.5 | Detected | 166447.3 | Detected   | 134295.7 | Detected   | 114887.3 | Detected   | Wfdc2         | 0.550866308 | 0.6439265  | 0.69023228 | 0.8068362 |
| A_55_P2090 | 17.8     | Detected | 4.5      | Not Detect | 34.5     | Detected   | 9.8      | Not Detect | Rad211        | 0.550561798 | 1.93820225 | 2.17777778 | 7.6666667 |
| A_52_P4859 | 379.2    | Detected | 190.2    | Detected   | 281.7    | Detected   | 208.6    | Detected   | Mdm4          | 0.550105485 | 0.74287975 | 1.09674027 | 1.4810726 |
| A_55_P2117 | 66.2     | Detected | 32.8     | Detected   | 18.8     | Detected   | 36.4     | Not Detect | Olf1243       | 0.549848943 | 0.28398792 | 1.1097561  | 0.5731707 |
| A_55_P2125 | 399.7    | Detected | 201.3    | Detected   | 256.1    | Detected   | 219.7    | Detected   | Ext2          | 0.549662247 | 0.64073055 | 1.09140586 | 1.2722305 |
| A_55_P2135 | 74.6     | Detected | 68.3     | Detected   | 31.4     | Detected   | 41       | Not Detect | Lce1c         | 0.549597855 | 0.42091153 | 0.60029283 | 0.4597365 |
| A_55_P2037 | 15.3     | Detected | 17.1     | Detected   | 13.2     | Not Detect | 8.4      | Not Detect | Trpm1         | 0.549019608 | 0.8627451  | 0.49122807 | 0.7719298 |
| A_51_P4135 | 17617.6  | Detected | 8556.9   | Detected   | 18795.6  | Detected   | 9668.8   | Detected   | Nek6          | 0.548814822 | 1.06686495 | 1.12994192 | 2.1965431 |
| A_51_P3042 | 18.6     | Detected | 75.6     | Detected   | 3.6      | Not Detect | 10.2     | Not Detect | Loxl1         | 0.548387097 | 0.19354839 | 0.13492063 | 0.047619  |
| A_55_P1962 | 58715.3  | Detected | 14877.6  | Detected   | 53628.2  | Detected   | 32195.1  | Detected   | Ugt1a6b       | 0.548325564 | 0.91335989 | 2.16399823 | 3.6046271 |
| A_55_P2016 | 24101.9  | Detected | 13133.6  | Detected   | 24342.7  | Detected   | 13214    | Detected   | Alkbh7        | 0.548255532 | 1.00999091 | 1.0061217  | 1.8534674 |
| A_55_P2053 | 1342.5   | Detected | 906.1    | Detected   | 950.8    | Detected   | 736      | Detected   | Xkr8          | 0.548230912 | 0.70823091 | 0.81227238 | 1.0493323 |
| A_52_P6631 | 3696.8   | Detected | 2166.3   | Detected   | 2843.8   | Detected   | 2026.7   | Detected   | Psmf1         | 0.548230902 | 0.7692599  | 0.93555833 | 1.3127452 |
| A_51_P2038 | 104.4    | Detected | 75.4     | Detected   | 54.1     | Detected   | 57.2     | Detected   | Adrb1         | 0.54789272  | 0.51819923 | 0.75862069 | 0.7175066 |
| A_55_P1982 | 23       | Detected | 21.8     | Detected   | 25.4     | Detected   | 12.6     | Not Detect | Olf1467       | 0.547826087 | 1.10434783 | 0.57798165 | 1.1651376 |
| A_51_P3547 | 5774.6   | Detected | 3190.9   | Detected   | 5012.1   | Detected   | 3163.3   | Detected   | Lefty1        | 0.547795518 | 0.86795622 | 0.9913504  | 1.5707481 |
| A_51_P3612 | 807.7    | Detected | 707.2    | Detected   | 1172.9   | Detected   | 442.4    | Detected   | Fzd4          | 0.547728117 | 1.45214807 | 0.62556561 | 1.6585124 |
| A_55_P2386 | 145.9    | Detected | 48.9     | Detected   | 81       | Detected   | 79.9     | Detected   | Ceacam2       | 0.547635367 | 0.55517478 | 1.63394683 | 1.6564417 |
| A_55_P1969 | 543.8    | Detected | 301      | Detected   | 453.1    | Detected   | 297.6    | Detected   | Zfp758        | 0.547260022 | 0.83321074 | 0.98870432 | 1.5053156 |
| A_66_P1397 | 4699.4   | Detected | 1197.4   | Detected   | 1399.7   | Detected   | 2571.5   | Detected   | Wnt4          | 0.547197515 | 0.29784653 | 2.14756973 | 1.1689494 |
| A_55_P1980 | 407.9    | Detected | 278.1    | Detected   | 381      | Detected   | 223.2    | Detected   | Dennd1a       | 0.547192939 | 0.93405246 | 0.802589   | 1.3700108 |
| A_55_P2088 | 1852.9   | Detected | 970.5    | Detected   | 1705.2   | Detected   | 1013.4   | Detected   | H2-T9         | 0.54692644  | 0.92028712 | 1.04420402 | 1.7570325 |
| A_55_P2132 | 68.6     | Detected | 44.8     | Detected   | 38.5     | Detected   | 37.5     | Not Detect | Tekt2         | 0.54664723  | 0.56122449 | 0.83705357 | 0.859375  |
| A_51_P5027 | 29.1     | Detected | 23.4     | Detected   | 12.6     | Not Detect | 15.9     | Not Detect | Olf1875       | 0.546391753 | 0.43298969 | 0.67948718 | 0.5384615 |
| A_55_P1983 | 30.2     | Detected | 22.5     | Detected   | 16.5     | Not Detect | 16.5     | Not Detect | C86187        | 0.546357616 | 0.54635762 | 0.73333333 | 0.7333333 |
| A_52_P4176 | 827.7    | Detected | 675.2    | Detected   | 687      | Detected   | 452.2    | Detected   | Pacs1         | 0.546333213 | 0.83001087 | 0.66972749 | 1.0174763 |
| A_55_P2032 | 55.1     | Detected | 29.1     | Detected   | 67       | Detected   | 30.1     | Not Detect | B230307C23Rik | 0.546279492 | 1.21597096 | 1.03436426 | 2.3024055 |
| A_52_P5648 | 34.6     | Detected | 30.5     | Detected   | 29.6     | Detected   | 18.9     | Not Detect | Zfp558        | 0.546242775 | 0.85549133 | 0.61967213 | 0.9704918 |
| A_66_P1148 | 18.5     | Detected | 14.8     | Not Detect | 6.1      | Not Detect | 10.1     | Not Detect | Iapp          | 0.545945946 | 0.32972973 | 0.68243243 | 0.4121622 |
| A_55_P2022 | 227.4    | Detected | 154.1    | Detected   | 194.7    | Detected   | 124.1    | Detected   | Rbpj          | 0.545734389 | 0.85620053 | 0.80532122 | 1.2634653 |
| A_51_P3357 | 18.7     | Detected | 22.4     | Detected   | 17.4     | Not Detect | 10.2     | Not Detect | Cldn26        | 0.545454545 | 0.93048128 | 0.45535714 | 0.7767857 |
| A_66_P1264 | 1146.5   | Detected | 882      | Detected   | 777.2    | Detected   | 625.1    | Detected   | Fam69a        | 0.545224597 | 0.67788923 | 0.70873016 | 0.8811791 |
| A_52_P1397 | 20       | Detected | 14.9     | Not Detect | 11.5     | Not Detect | 10.9     | Not Detect | Adamts1       | 0.545       | 0.575      | 0.73154362 | 0.7718121 |
| A_55_P2125 | 2138.9   | Detected | 1087     | Detected   | 1647.2   | Detected   | 1165.7   | Detected   | Sec1411       | 0.544999766 | 0.77011548 | 1.0724011  | 1.5153634 |
| A_51_P2124 | 17.8     | Detected | 3.4      | Not Detect | 3.5      | Not Detect | 9.7      | Not Detect | Lama4         | 0.54494382  | 0.19662921 | 2.85294118 | 1.0294118 |
| A_51_P1061 | 9452.5   | Detected | 6284.3   | Detected   | 7743.3   | Detected   | 5150.6   | Detected   | Zfp64         | 0.544892885 | 0.81918011 | 0.81959805 | 1.2321659 |
| A_55_P2167 | 87.2     | Detected | 102.7    | Detected   | 77.6     | Detected   | 47.5     | Detected   | Hdhd2         | 0.544724771 | 0.88990826 | 0.46251217 | 0.7555988 |
| A_55_P2078 | 23.5     | Detected | 19.7     | Detected   | 10.3     | Not Detect | 12.8     | Not Detect | Foxl2os       | 0.544680851 | 0.43829787 | 0.64974619 | 0.5228426 |
| A_52_P6315 | 6682.3   | Detected | 5590.2   | Detected   | 5273.6   | Detected   | 3639.7   | Detected   | Thoc6         | 0.544677731 | 0.78918935 | 0.65108583 | 0.9433652 |
| A_51_P4050 | 696.9    | Detected | 504.2    | Detected   | 352.8    | Detected   | 379.5    | Detected   | Lpcat1        | 0.544554455 | 0.50624193 | 0.75267751 | 0.6997223 |

|            |         |          |         |            |         |            |         |            |               |             |            |            |           |
|------------|---------|----------|---------|------------|---------|------------|---------|------------|---------------|-------------|------------|------------|-----------|
| A_51_P2776 | 525.6   | Detected | 361     | Detected   | 464.9   | Detected   | 286.2   | Detected   | Zfp81         | 0.544520548 | 0.88451294 | 0.79279778 | 1.2878116 |
| A_55_P2125 | 1607.3  | Detected | 686.9   | Detected   | 929.4   | Detected   | 875.1   | Detected   | Gm13247       | 0.544453431 | 0.57823679 | 1.27398457 | 1.3530354 |
| A_51_P3055 | 2580.6  | Detected | 1353.5  | Detected   | 495.1   | Detected   | 1404.7  | Detected   | Snai2         | 0.544330776 | 0.19185461 | 1.03782785 | 0.3657924 |
| A_51_P3023 | 47.8    | Detected | 68.8    | Detected   | 49.6    | Detected   | 26      | Not Detect | Lgals7        | 0.543933054 | 1.0376569  | 0.37790698 | 0.7209302 |
| A_51_P4110 | 17241.5 | Detected | 9033.1  | Detected   | 11038.3 | Detected   | 9377.7  | Detected   | Tmem127       | 0.543902793 | 0.64021692 | 1.03814859 | 1.2219836 |
| A_51_P2737 | 17.1    | Detected | 16.8    | Detected   | 3.3     | Not Detect | 9.3     | Not Detect | Zfp354c       | 0.543859649 | 0.19298246 | 0.55357143 | 0.1964286 |
| A_55_P1959 | 2137.9  | Detected | 2240.5  | Detected   | 1967.8  | Detected   | 1162.5  | Detected   | Sbno2         | 0.543757893 | 0.92043594 | 0.5188574  | 0.8782861 |
| A_51_P3029 | 237.8   | Detected | 94.5    | Detected   | 45.1    | Detected   | 129.3   | Detected   | Rasl10a       | 0.54373423  | 0.18965517 | 1.36825397 | 0.4772487 |
| A_55_P1975 | 60196.3 | Detected | 48642.5 | Detected   | 38678   | Detected   | 32730.5 | Detected   | Bicc1         | 0.543729432 | 0.64253119 | 0.67287866 | 0.7951483 |
| A_51_P4931 | 928.2   | Detected | 881.6   | Detected   | 363.2   | Detected   | 504.6   | Detected   | Mettl15       | 0.543632838 | 0.39129498 | 0.57236842 | 0.4119782 |
| A_52_P9440 | 2748.3  | Detected | 1170.1  | Detected   | 3321.8  | Detected   | 1493.7  | Detected   | Rtn4rl1       | 0.543499618 | 1.20867445 | 1.27655756 | 2.8389027 |
| A_55_P2067 | 6146    | Detected | 4364.2  | Detected   | 2251.7  | Detected   | 3340    | Detected   | 2410089E03Rik | 0.54344289  | 0.36636837 | 0.76531781 | 0.5159479 |
| A_52_P3491 | 148.5   | Detected | 127.3   | Detected   | 163.1   | Detected   | 80.7    | Detected   | Dtwd2         | 0.543434343 | 1.0983165  | 0.63393559 | 1.2812255 |
| A_51_P2591 | 77.3    | Detected | 186.6   | Detected   | 35.2    | Detected   | 42      | Not Detect | Klhl1         | 0.543337646 | 0.45536869 | 0.22508039 | 0.1886388 |
| A_55_P2124 | 2790.8  | Detected | 2382.8  | Detected   | 2476.2  | Detected   | 1516.2  | Detected   | Synj2         | 0.54328508  | 0.88727247 | 0.63631022 | 1.0391976 |
| A_55_P2102 | 19.7    | Detected | 15.5    | Detected   | 27.5    | Detected   | 10.7    | Not Detect | Gm3893        | 0.543147208 | 1.39593909 | 0.69032258 | 1.7741935 |
| A_55_P2000 | 12863.6 | Detected | 9484.4  | Detected   | 8908.4  | Detected   | 6986.8  | Detected   | Irf1          | 0.543144998 | 0.69252775 | 0.73666231 | 0.9392687 |
| A_51_P4766 | 3932.9  | Detected | 1929.9  | Detected   | 2263.1  | Detected   | 2135.8  | Detected   | Ly96          | 0.543059829 | 0.5754278  | 1.10668947 | 1.1726514 |
| A_66_P1194 | 18.6    | Detected | 13.8    | Not Detect | 13.1    | Not Detect | 10.1    | Not Detect | Hepacam       | 0.543010753 | 0.70430108 | 0.73188406 | 0.9492754 |
| A_51_P1421 | 809     | Detected | 734.3   | Detected   | 479.2   | Detected   | 439.2   | Detected   | Fzd7          | 0.54289246  | 0.59233622 | 0.59812066 | 0.6525943 |
| A_51_P3965 | 368.8   | Detected | 234.2   | Detected   | 249     | Detected   | 200.1   | Detected   | Sufu          | 0.542570499 | 0.67516269 | 0.85439795 | 1.0631939 |
| A_55_P2030 | 207.2   | Detected | 136.1   | Detected   | 495.6   | Detected   | 112.4   | Detected   | Frm4a         | 0.542471042 | 2.39189189 | 0.82586334 | 3.6414401 |
| A_55_P2034 | 16.6    | Detected | 10.7    | Not Detect | 75.7    | Detected   | 9       | Not Detect | Clvs1         | 0.542168675 | 4.56024096 | 0.8411215  | 7.0747664 |
| A_52_P7473 | 17.9    | Detected | 14.5    | Not Detect | 36.2    | Detected   | 9.7     | Not Detect | A330084C13Rik | 0.541899441 | 2.02234637 | 0.66896552 | 2.4965517 |
| A_52_P3505 | 4819.5  | Detected | 4961.6  | Detected   | 962.2   | Detected   | 2610.6  | Detected   | Kctd17        | 0.541674448 | 0.19964727 | 0.52616092 | 0.1939294 |
| A_55_P2373 | 50.4    | Detected | 28.2    | Detected   | 15.1    | Detected   | 27.3    | Not Detect | Slc12a1       | 0.541666667 | 0.29960317 | 0.96808511 | 0.535461  |
| A_55_P2097 | 18.1    | Detected | 11.3    | Not Detect | 9.5     | Not Detect | 9.8     | Not Detect | Ankrd6        | 0.541436464 | 0.52486188 | 0.86725664 | 0.840708  |
| A_55_P2016 | 15.7    | Detected | 15.9    | Detected   | 12.8    | Not Detect | 8.5     | Not Detect | Hand2         | 0.541401274 | 0.81528662 | 0.53459119 | 0.8050314 |
| A_52_P5518 | 37.5    | Detected | 55.7    | Detected   | 30.2    | Detected   | 20.3    | Not Detect | Ccdc69        | 0.541333333 | 0.80533333 | 0.36445242 | 0.5421903 |
| A_55_P2002 | 238.5   | Detected | 321.7   | Detected   | 266.1   | Detected   | 129.1   | Detected   | Lats2         | 0.54129979  | 1.11572327 | 0.40130556 | 0.8271682 |
| A_55_P2032 | 17      | Detected | 3       | Not Detect | 3.1     | Not Detect | 9.2     | Not Detect | Cc2d2b        | 0.541176471 | 0.18235294 | 3.06666667 | 1.0333333 |
| A_55_P2021 | 424.5   | Detected | 193.5   | Detected   | 327.2   | Detected   | 229.7   | Detected   | Ier5          | 0.541107185 | 0.77078916 | 1.1870801  | 1.6909561 |
| A_55_P2103 | 4494.1  | Detected | 3249.4  | Detected   | 2814.6  | Detected   | 2431    | Detected   | Snx9          | 0.540931443 | 0.6262878  | 0.74813812 | 0.8661907 |
| A_55_P2317 | 110     | Detected | 23      | Detected   | 35.9    | Detected   | 59.5    | Detected   | AI594674      | 0.540909091 | 0.32636364 | 2.58695652 | 1.5608696 |
| A_55_P2064 | 1804    | Detected | 1316.6  | Detected   | 1793.2  | Detected   | 975.6   | Detected   | Vps37d        | 0.540798226 | 0.9940133  | 0.74099954 | 1.361993  |
| A_55_P2170 | 10215.6 | Detected | 5540.7  | Detected   | 8653.6  | Detected   | 5520.8  | Detected   | Lactb2        | 0.540428364 | 0.8470966  | 0.9964084  | 1.5618243 |
| A_51_P1815 | 14205.4 | Detected | 13509.1 | Detected   | 12035.5 | Detected   | 7676.9  | Detected   | Hbegf         | 0.540421248 | 0.84724823 | 0.5682762  | 0.890918  |
| A_65_P0141 | 2172.2  | Detected | 2476.2  | Detected   | 670.6   | Detected   | 1173.1  | Detected   | Kremen1       | 0.540051561 | 0.30871927 | 0.4737501  | 0.2708182 |
| A_52_P1130 | 25      | Detected | 33.6    | Detected   | 16      | Not Detect | 13.5    | Not Detect | Kctd4         | 0.54        | 0.64       | 0.40178571 | 0.4761905 |
| A_55_P2016 | 99814.8 | Detected | 76912.5 | Detected   | 56819   | Detected   | 53896.5 | Detected   | Wfdc2         | 0.539965015 | 0.56924424 | 0.70075085 | 0.7387486 |

|            |                  |                  |                  |                  |               |             |            |            |           |
|------------|------------------|------------------|------------------|------------------|---------------|-------------|------------|------------|-----------|
| A_52_P3400 | 9166.2 Detected  | 8349.7 Detected  | 5171.1 Detected  | 4949.2 Detected  | Efnb2         | 0.539940215 | 0.56414872 | 0.59273986 | 0.6193157 |
| A_52_P2701 | 353.1 Detected   | 266.6 Detected   | 209.3 Detected   | 190.6 Detected   | Bbs5          | 0.539790428 | 0.59274993 | 0.71492873 | 0.7850713 |
| A_52_P1228 | 249.2 Detected   | 164.6 Detected   | 203.3 Detected   | 134.5 Detected   | Wdfy2         | 0.539727127 | 0.81581059 | 0.81713244 | 1.2351154 |
| A_51_P1797 | 273.2 Detected   | 146.7 Detected   | 114.2 Detected   | 147.4 Detected   | Hlx           | 0.539531479 | 0.41800878 | 1.00477164 | 0.7784594 |
| A_55_P2097 | 21.9 Detected    | 20.5 Detected    | 24.6 Detected    | 11.8 Not Detect  | Ccdc34        | 0.538812785 | 1.12328767 | 0.57560976 | 1.2       |
| A_55_P1985 | 23.2 Detected    | 20.3 Detected    | 26.6 Detected    | 12.5 Not Detect  | Usp2          | 0.538793103 | 1.14655172 | 0.61576355 | 1.3103448 |
| A_55_P1968 | 14528 Detected   | 8090.4 Detected  | 5450.9 Detected  | 7826.2 Detected  | Pacsin3       | 0.538697687 | 0.37519961 | 0.96734401 | 0.6737491 |
| A_51_P2714 | 992.5 Detected   | 1154.8 Detected  | 890.1 Detected   | 534.5 Detected   | Garem         | 0.538539043 | 0.8968262  | 0.46285071 | 0.7707828 |
| A_55_P2048 | 2579.1 Detected  | 1608.2 Detected  | 1285.6 Detected  | 1388.6 Detected  | Msantd3       | 0.53840487  | 0.49846846 | 0.86344982 | 0.7994031 |
| A_55_P2402 | 91.6 Detected    | 28.7 Detected    | 50.7 Detected    | 49.3 Detected    | B230216N24Rik | 0.538209607 | 0.55349345 | 1.71777003 | 1.7665505 |
| A_55_P2012 | 2310.7 Detected  | 2612.8 Detected  | 1913.5 Detected  | 1243.6 Detected  | Fermt2        | 0.53819189  | 0.82810404 | 0.47596448 | 0.7323561 |
| A_55_P2131 | 24.9 Detected    | 23.1 Detected    | 9.8 Not Detect   | 13.4 Not Detect  | Gm13083       | 0.53815261  | 0.3935743  | 0.58008658 | 0.4242424 |
| A_52_P6556 | 3167.3 Detected  | 2173.5 Detected  | 738.7 Detected   | 1704.1 Detected  | H13           | 0.538029236 | 0.23322704 | 0.78403497 | 0.3398666 |
| A_55_P2107 | 3451.8 Detected  | 2545.3 Detected  | 3668.4 Detected  | 1856.2 Detected  | Dlk2          | 0.537748421 | 1.06274987 | 0.72926571 | 1.4412446 |
| A_55_P1983 | 31168.2 Detected | 22351.2 Detected | 15025.1 Detected | 16758.6 Detected | Acs14         | 0.537682638 | 0.48206505 | 0.74978525 | 0.6722279 |
| A_51_P1573 | 18.6 Detected    | 17.1 Not Detect  | 18.6 Detected    | 10 Not Detect    | Usp33         | 0.537634409 | 1          | 0.58479532 | 1.0877193 |
| A_55_P2064 | 19 Detected      | 21.3 Detected    | 13.3 Not Detect  | 10.2 Not Detect  | Trim12a       | 0.536842105 | 0.7        | 0.47887324 | 0.6244131 |
| A_55_P2033 | 198.2 Detected   | 113.8 Detected   | 121.8 Detected   | 106.4 Detected   | LOC101055644  | 0.536831483 | 0.61453078 | 0.93497364 | 1.0702988 |
| A_55_P2118 | 21.8 Detected    | 22.4 Detected    | 20.5 Detected    | 11.7 Not Detect  | Sez6l         | 0.536697248 | 0.94036697 | 0.52232143 | 0.9151786 |
| A_52_P4657 | 86.9 Detected    | 36.5 Detected    | 61.1 Detected    | 46.6 Not Detect  | Fam178a       | 0.536248562 | 0.70310702 | 1.27671233 | 1.6739726 |
| A_51_P3119 | 56.7 Detected    | 32.7 Detected    | 28.6 Detected    | 30.4 Not Detect  | Orm3          | 0.536155203 | 0.50440917 | 0.92966361 | 0.8746177 |
| A_55_P1957 | 464.7 Detected   | 266.2 Detected   | 759.4 Detected   | 249.1 Detected   | Gpsm3         | 0.53604476  | 1.63417258 | 0.93576258 | 2.8527423 |
| A_51_P5170 | 18.1 Detected    | 26.3 Detected    | 60.7 Detected    | 9.7 Not Detect   | D130040H23Rik | 0.535911602 | 3.35359116 | 0.36882129 | 2.3079848 |
| A_55_P2268 | 23.9 Detected    | 26.2 Detected    | 25.9 Detected    | 12.8 Not Detect  | Gm17244       | 0.535564854 | 1.08368201 | 0.48854962 | 0.9885496 |
| A_52_P2468 | 401.9 Detected   | 250.6 Detected   | 344.6 Detected   | 215.2 Detected   | Haus2         | 0.535456581 | 0.85742722 | 0.85873903 | 1.3750998 |
| A_55_P2098 | 39.8 Detected    | 36.1 Detected    | 34.5 Detected    | 21.3 Not Detect  | Ugt2a1        | 0.535175879 | 0.86683417 | 0.5900277  | 0.9556787 |
| A_51_P4984 | 18.7 Detected    | 22.2 Detected    | 12.1 Not Detect  | 10 Not Detect    | Krtap15       | 0.534759358 | 0.64705882 | 0.45045045 | 0.545045  |
| A_52_P1040 | 116.7 Detected   | 104.2 Detected   | 47.9 Detected    | 62.4 Detected    | Slc25a27      | 0.53470437  | 0.41045416 | 0.59884837 | 0.4596929 |
| A_51_P1946 | 36.3 Detected    | 25.5 Detected    | 30.1 Detected    | 19.4 Not Detect  | Gk2           | 0.534435262 | 0.8292011  | 0.76078431 | 1.1803922 |
| A_51_P1158 | 11889.3 Detected | 4004.9 Detected  | 13220.2 Detected | 6353.3 Detected  | Ralgs2        | 0.534371241 | 1.11194099 | 1.58638168 | 3.3010063 |
| A_55_P2113 | 2911.5 Detected  | 2638.2 Detected  | 672.2 Detected   | 1555.4 Detected  | Camkk1        | 0.534226344 | 0.23087755 | 0.58956865 | 0.2547949 |
| A_55_P2179 | 16.1 Detected    | 10.6 Not Detect  | 8.8 Not Detect   | 8.6 Not Detect   | 9030624G23Rik | 0.534161491 | 0.54658385 | 0.81132075 | 0.8301887 |
| A_52_P3638 | 28.1 Detected    | 47.4 Detected    | 20.9 Detected    | 15 Not Detect    | Zscan4c       | 0.533807829 | 0.74377224 | 0.3164557  | 0.4409283 |
| A_52_P6645 | 1626.1 Detected  | 1163.3 Detected  | 1829 Detected    | 867.7 Detected   | Abhd2         | 0.533608019 | 1.12477707 | 0.7458953  | 1.5722514 |
| A_55_P2040 | 362.5 Detected   | 349.5 Detected   | 262.3 Detected   | 193.4 Detected   | Eng           | 0.533517241 | 0.72358621 | 0.55336195 | 0.7505007 |
| A_51_P4268 | 323.1 Detected   | 315.7 Detected   | 399.3 Detected   | 172.3 Detected   | Gdpd3         | 0.533271433 | 1.2358403  | 0.5457713  | 1.2648084 |
| A_51_P3235 | 10107.5 Detected | 5087 Detected    | 6746 Detected    | 5389.4 Detected  | Snx21         | 0.533208014 | 0.66742518 | 1.05944565 | 1.3261254 |
| A_66_P1388 | 338.2 Detected   | 801.4 Detected   | 3.3 Not Detect   | 180.3 Detected   | Sp8           | 0.533116499 | 0.00975754 | 0.22498128 | 0.0041178 |
| A_51_P5167 | 2839.7 Detected  | 2617.4 Detected  | 1609.4 Detected  | 1513.2 Detected  | Ern1          | 0.532873191 | 0.56675001 | 0.57813097 | 0.614885  |
| A_55_P2097 | 180.2 Detected   | 129 Detected     | 59.4 Detected    | 96 Detected      | Eid1          | 0.532741398 | 0.32963374 | 0.74418605 | 0.4604651 |

|            |         |          |         |            |         |            |         |            |               |                   |            |            |           |
|------------|---------|----------|---------|------------|---------|------------|---------|------------|---------------|-------------------|------------|------------|-----------|
| A_55_P2165 | 3225.2  | Detected | 1801.2  | Detected   | 1797.3  | Detected   | 1716.5  | Detected   | Plekhg5       | 0.532215056       | 0.55726777 | 0.95297579 | 0.9978348 |
| A_55_P2004 | 18.8    | Detected | 13.4    | Not Detect | 8.7     | Not Detect | 10      | Not Detect | Gm6402        | 0.531914894       | 0.46276596 | 0.74626866 | 0.6492537 |
| A_55_P2107 | 22.2    | Detected | 17.4    | Detected   | 19.1    | Detected   | 11.8    | Not Detect | BC030307      | 0.531531532       | 0.86036036 | 0.67816092 | 1.0977011 |
| A_55_P2351 | 274     | Detected | 326.3   | Detected   | 209.3   | Detected   | 145.6   | Detected   | Snora47       | 0.531386861       | 0.76386861 | 0.44621514 | 0.6414343 |
| A_52_P5940 | 4761.6  | Detected | 3319    | Detected   | 3474.9  | Detected   | 2530    | Detected   | Actr5         | 0.531334005       | 0.72977571 | 0.76227779 | 1.046972  |
| A_55_P1956 | 33.7    | Detected | 165     | Detected   | 23.3    | Detected   | 17.9    | Not Detect | Gpr68         | 0.53115727        | 0.69139466 | 0.10848485 | 0.1412121 |
| A_51_P1147 | 469.8   | Detected | 267.4   | Detected   | 298.4   | Detected   | 249.5   | Detected   | Cpne1         | 0.531077054       | 0.6351639  | 0.93305909 | 1.1159312 |
| A_55_P2046 | 17.7    | Detected | 18.6    | Detected   | 8.8     | Not Detect | 9.4     | Not Detect | 1700003E24Rik | 0.531073446       | 0.49717514 | 0.50537634 | 0.4731183 |
| A_55_P2033 | 2262.5  | Detected | 1172    | Detected   | 2041.1  | Detected   | 1201.4  | Detected   | Pdp1          | 0.531005525       | 0.90214365 | 1.02508532 | 1.7415529 |
| A_51_P2542 | 12750.6 | Detected | 8934.6  | Detected   | 13391   | Detected   | 6770.3  | Detected   | Dlk2          | 0.530978934       | 1.05022509 | 0.75776196 | 1.49878   |
| A_55_P1955 | 107     | Detected | 165.7   | Detected   | 80.3    | Detected   | 56.8    | Detected   | Gm7978        | 0.530841121       | 0.75046729 | 0.34278817 | 0.4846107 |
| A_55_P2093 | 3750.3  | Detected | 1917.3  | Detected   | 3206.2  | Detected   | 1990.7  | Detected   | Dnajc5        | 0.530810868       | 0.85491827 | 1.038283   | 1.6722474 |
| A_55_P2062 | 21.1    | Detected | 108.6   | Detected   | 12.2    | Not Detect | 11.2    | Not Detect | Mfap5         | 0.530805687       | 0.57819905 | 0.10313076 | 0.1123389 |
| A_52_P8926 | 626.3   | Detected | 441.6   | Detected   | 297.7   | Detected   | 332.4   | Detected   | Gatsl2        | 0.530736069       | 0.47533131 | 0.75271739 | 0.6741395 |
| A_51_P4347 | 530.6   | Detected | 294.7   | Detected   | 576.6   | Detected   | 281.5   | Detected   | Jmjd8         | 0.530531474       | 1.08669431 | 0.95520869 | 1.956566  |
| A_55_P2021 | 16.6    | Detected | 7.1     | Not Detect | 8       | Not Detect | 8.8     | Not Detect | BC106179      | 0.530120482       | 0.48192771 | 1.23943662 | 1.1267606 |
| A_55_P2063 | 26.6    | Detected | 19.7    | Detected   | 21.9    | Detected   | 14.1    | Not Detect | C230099D08Rik | 0.530075188       | 0.82330827 | 0.71573604 | 1.1116751 |
| A_52_P4767 | 2092.8  | Detected | 4014.7  | Detected   | 1224.3  | Detected   | 1109.3  | Detected   | Fam110c       | 0.530055428       | 0.58500573 | 0.27630956 | 0.3049543 |
| A_52_P1551 | 156.8   | Detected | 109.7   | Detected   | 40.9    | Detected   | 83.1    | Detected   | Zfp229        | 0.52997449        | 0.26084184 | 0.75752051 | 0.372835  |
| A_55_P2037 | 106.8   | Detected | 77.6    | Detected   | 16.4    | Not Detect | 56.6    | Detected   | Gm10638       | 0.529962547       | 0.15355805 | 0.72938144 | 0.2113402 |
| A_51_P4651 | 125.7   | Detected | 104.7   | Detected   | 144     | Detected   | 66.6    | Detected   | Hoga1         | 0.529832936       | 1.14558473 | 0.63610315 | 1.3753582 |
| A_55_P1992 | 214.1   | Detected | 136.6   | Detected   | 85      | Detected   | 113.4   | Detected   | Epb4.111      | 0.529659038       | 0.39701074 | 0.83016105 | 0.6222548 |
| A_52_P1967 | 96.5    | Detected | 64.3    | Detected   | 39.2    | Detected   | 51.1    | Detected   | Zfp169        | 0.529533679       | 0.40621762 | 0.79471229 | 0.6096423 |
| A_51_P1236 | 1396.4  | Detected | 2236    | Detected   | 185.5   | Detected   | 739     | Detected   | Synpo         | 0.529217989       | 0.13284159 | 0.33050089 | 0.0829606 |
| A_55_P2076 | 704.4   | Detected | 689.7   | Detected   | 472.1   | Detected   | 372.7   | Detected   | Farp1         | 0.529102783       | 0.67021579 | 0.54037988 | 0.6845005 |
| A_55_P2000 | 17.2    | Detected | 8.3     | Not Detect | 11.3    | Not Detect | 9.1     | Not Detect | Syt15         | 0.529069767       | 0.65697674 | 1.09638554 | 1.3614458 |
| A_55_P1988 | 4737.1  | Detected | 4642.3  | Detected   | 2584.6  | Detected   | 2505.6  | Detected   |               | 9-Sep 0.528931203 | 0.54560807 | 0.53973246 | 0.5567499 |
| A_51_P1679 | 20.8    | Detected | 15.7    | Not Detect | 3.9     | Not Detect | 11      | Not Detect | Tifab         | 0.528846154       | 0.1875     | 0.70063694 | 0.2484076 |
| A_55_P2024 | 8333    | Detected | 2756.4  | Detected   | 8149.6  | Detected   | 4406.1  | Detected   | Tbkbp1        | 0.52875315        | 0.97799112 | 1.59849804 | 2.9566101 |
| A_55_P2136 | 753.8   | Detected | 448.5   | Detected   | 481     | Detected   | 398.4   | Detected   | Cep250        | 0.528522154       | 0.63810029 | 0.88829431 | 1.0724638 |
| A_55_P2080 | 19.3    | Detected | 17.2    | Not Detect | 3.9     | Not Detect | 10.2    | Not Detect | Plaa          | 0.528497409       | 0.20207254 | 0.59302326 | 0.2267442 |
| A_66_P1162 | 279.9   | Detected | 193.2   | Detected   | 176.9   | Detected   | 147.9   | Detected   | Tpgs2         | 0.528403001       | 0.63201143 | 0.76552795 | 0.9156315 |
| A_55_P2068 | 4368.5  | Detected | 2233.6  | Detected   | 3573.9  | Detected   | 2307.9  | Detected   | Rap1gap       | 0.52830491        | 0.8181069  | 1.03326468 | 1.6000627 |
| A_55_P2048 | 45901.7 | Detected | 14730.6 | Detected   | 41891.7 | Detected   | 24236.9 | Detected   | Efemp1        | 0.528017481       | 0.9126394  | 1.64534371 | 2.8438556 |
| A_52_P6125 | 320.6   | Detected | 159.3   | Detected   | 178.6   | Detected   | 169.2   | Detected   | Ss18l1        | 0.527760449       | 0.55708047 | 1.06214689 | 1.1211551 |
| A_52_P4285 | 1262.4  | Detected | 847.4   | Detected   | 582.1   | Detected   | 666     | Detected   | Fgd1          | 0.52756654        | 0.46110583 | 0.78593344 | 0.6869247 |
| A_55_P2137 | 1012.4  | Detected | 288.9   | Detected   | 164.2   | Detected   | 534.1   | Detected   | Dip2c         | 0.527558277       | 0.16218886 | 1.84873659 | 0.5683628 |
| A_55_P1985 | 1890.3  | Detected | 2621.9  | Detected   | 986.4   | Detected   | 996.8   | Detected   | Dlg3          | 0.527323705       | 0.52182193 | 0.38018231 | 0.3762157 |
| A_52_P4107 | 18.8    | Detected | 41.5    | Detected   | 3.8     | Not Detect | 9.9     | Not Detect | Sema7a        | 0.526595745       | 0.20212766 | 0.23855422 | 0.0915663 |
| A_55_P2144 | 12484.3 | Detected | 6717.9  | Detected   | 8739.7  | Detected   | 6571.4  | Detected   | Apip          | 0.526373125       | 0.70005527 | 0.97819259 | 1.3009571 |

|            |          |          |         |            |          |            |          |            |             |             |            |            |           |
|------------|----------|----------|---------|------------|----------|------------|----------|------------|-------------|-------------|------------|------------|-----------|
| A_55_P2021 | 1012.7   | Detected | 657.4   | Detected   | 702.1    | Detected   | 532.7    | Detected   | Ier5        | 0.526019552 | 0.69329515 | 0.81031336 | 1.0679951 |
| A_52_P8577 | 17.3     | Detected | 13.6    | Not Detect | 15       | Not Detect | 9.1      | Not Detect | Trim6       | 0.526011561 | 0.86705202 | 0.66911765 | 1.1029412 |
| A_55_P2092 | 13379.3  | Detected | 9717.1  | Detected   | 9077.7   | Detected   | 7036.1   | Detected   | Tgif1       | 0.525894479 | 0.67848841 | 0.72409464 | 0.9341985 |
| A_66_P1057 | 4597     | Detected | 3150.2  | Detected   | 3030.9   | Detected   | 2416.6   | Detected   | Tor1b       | 0.525690668 | 0.6593213  | 0.7671259  | 0.9621294 |
| A_55_P1991 | 8328     | Detected | 4769.7  | Detected   | 5850.5   | Detected   | 4376.6   | Detected   | Gamt        | 0.525528338 | 0.70250961 | 0.91758392 | 1.2265971 |
| A_55_P2120 | 17.7     | Detected | 9       | Not Detect | 10.9     | Not Detect | 9.3      | Not Detect | Olfir75-ps1 | 0.525423729 | 0.61581921 | 1.03333333 | 1.2111111 |
| A_55_P2369 | 394      | Detected | 155.1   | Detected   | 396.5    | Detected   | 207      | Detected   | Ggta1       | 0.525380711 | 1.00634518 | 1.33462282 | 2.5564152 |
| A_51_P3347 | 278.8    | Detected | 215     | Detected   | 154.6    | Detected   | 146.3    | Detected   | Cdon        | 0.524748924 | 0.55451937 | 0.68046512 | 0.7190698 |
| A_55_P1975 | 18874.2  | Detected | 5413.3  | Detected   | 10244.2  | Detected   | 9902.6   | Detected   | H6pd        | 0.524663297 | 0.54276208 | 1.82930929 | 1.8924131 |
| A_55_P2074 | 20982.2  | Detected | 13628.6 | Detected   | 11616.8  | Detected   | 11006.9  | Detected   | Dlgap4      | 0.524582742 | 0.55365024 | 0.80763248 | 0.852384  |
| A_52_P2502 | 26.7     | Detected | 37.8    | Detected   | 4.4      | Not Detect | 14       | Not Detect | Klra17      | 0.524344569 | 0.16479401 | 0.37037037 | 0.1164021 |
| A_55_P2065 | 1187.1   | Detected | 1167.1  | Detected   | 481.9    | Detected   | 622.2    | Detected   | Stk30       | 0.524134445 | 0.40594727 | 0.53311627 | 0.4129038 |
| A_52_P5766 | 1579.9   | Detected | 774.1   | Detected   | 1357.8   | Detected   | 827.3    | Detected   | Zfp944      | 0.523640737 | 0.85942148 | 1.06872497 | 1.7540369 |
| A_52_P1637 | 202743.9 | Detected | 133954  | Detected   | 139960.6 | Detected   | 106126.5 | Detected   | Tubb5       | 0.523451014 | 0.69033199 | 0.79226078 | 1.0448408 |
| A_55_P2092 | 109927.5 | Detected | 92851.6 | Detected   | 86141.4  | Detected   | 57539.4  | Detected   | Anxa1       | 0.523430443 | 0.78362011 | 0.61969207 | 0.927732  |
| A_55_P2116 | 181.9    | Detected | 73.3    | Detected   | 55.3     | Detected   | 95.2     | Detected   | Tnfrsf25    | 0.523364486 | 0.30401319 | 1.29877217 | 0.7544338 |
| A_55_P1997 | 19912.8  | Detected | 10165.2 | Detected   | 13885.9  | Detected   | 10421.4  | Detected   | Apip        | 0.523351814 | 0.69733538 | 1.02520364 | 1.3660233 |
| A_55_P2174 | 19.3     | Detected | 17.2    | Not Detect | 13.6     | Not Detect | 10.1     | Not Detect | St8sia5     | 0.523316062 | 0.70466321 | 0.5872093  | 0.7906977 |
| A_55_P2012 | 19.3     | Detected | 19.3    | Detected   | 15.7     | Not Detect | 10.1     | Not Detect | Smim14      | 0.523316062 | 0.8134715  | 0.52331606 | 0.8134715 |
| A_51_P2808 | 17.2     | Detected | 20.2    | Detected   | 17.7     | Detected   | 9        | Not Detect | Pla2g1b     | 0.523255814 | 1.02906977 | 0.44554455 | 0.8762376 |
| A_55_P2039 | 6379.6   | Detected | 3418.7  | Detected   | 5333.2   | Detected   | 3337.5   | Detected   | Rap1gap     | 0.523151922 | 0.83597718 | 0.97624828 | 1.5600082 |
| A_55_P1955 | 1428.6   | Detected | 779     | Detected   | 1071.2   | Detected   | 747.3    | Detected   | Zfp820      | 0.523099538 | 0.749825   | 0.9593068  | 1.3750963 |
| A_55_P2014 | 100      | Detected | 51.7    | Detected   | 41.2     | Detected   | 52.3     | Detected   | Gm4354      | 0.523       | 0.412      | 1.01160542 | 0.7969052 |
| A_51_P2596 | 26.2     | Detected | 20.1    | Detected   | 19.4     | Detected   | 13.7     | Not Detect | Tsks        | 0.522900763 | 0.74045802 | 0.68159204 | 0.9651741 |
| A_52_P3319 | 2055.2   | Detected | 1560.4  | Detected   | 1620.4   | Detected   | 1074.6   | Detected   | Trp53rk     | 0.522868821 | 0.78843908 | 0.68866957 | 1.0384517 |
| A_55_P1976 | 213.7    | Detected | 112.4   | Detected   | 195.8    | Detected   | 111.7    | Detected   | Gpcpd1      | 0.522695367 | 0.91623772 | 0.99377224 | 1.7419929 |
| A_51_P4416 | 41.9     | Detected | 23.3    | Detected   | 24       | Detected   | 21.9     | Not Detect | Lrrc10      | 0.522673031 | 0.57279236 | 0.93991416 | 1.0300429 |
| A_52_P2516 | 37.7     | Detected | 23.9    | Detected   | 15.8     | Not Detect | 19.7     | Not Detect | Fam222a     | 0.522546419 | 0.41909814 | 0.82426778 | 0.6610879 |
| A_55_P1999 | 57.8     | Detected | 33.6    | Detected   | 25.8     | Detected   | 30.2     | Not Detect | Defb45      | 0.522491349 | 0.44636678 | 0.89880952 | 0.7678571 |
| A_66_P1267 | 17.8     | Detected | 3.8     | Not Detect | 5.8      | Not Detect | 9.3      | Not Detect | Gm4792      | 0.52247191  | 0.3258427  | 2.44736842 | 1.5263158 |
| A_52_P4123 | 17.8     | Detected | 5.6     | Not Detect | 3.3      | Not Detect | 9.3      | Not Detect | Fbxl21      | 0.52247191  | 0.18539326 | 1.66071429 | 0.5892857 |
| A_52_P4991 | 36       | Detected | 30.9    | Detected   | 28.5     | Detected   | 18.8     | Not Detect | Tex101      | 0.522222222 | 0.79166667 | 0.60841424 | 0.9223301 |
| A_66_P1200 | 709.8    | Detected | 397.3   | Detected   | 446.9    | Detected   | 370.5    | Detected   | Uhrf1       | 0.521978022 | 0.62961398 | 0.93254468 | 1.1248427 |
| A_51_P1454 | 2007.6   | Detected | 1207    | Detected   | 1281.1   | Detected   | 1046.7   | Detected   | Lin7c       | 0.521368799 | 0.63812512 | 0.86719138 | 1.0613919 |
| A_55_P1960 | 10779.8  | Detected | 5795.4  | Detected   | 6528.7   | Detected   | 5619.7   | Detected   | Nlgn2       | 0.52131765  | 0.60564203 | 0.96968285 | 1.1265314 |
| A_55_P2085 | 843.5    | Detected | 992.7   | Detected   | 259.3    | Detected   | 439.7    | Detected   | Vgf         | 0.521280379 | 0.3074096  | 0.44293341 | 0.2612068 |
| A_52_P2220 | 18.8     | Detected | 11.2    | Not Detect | 18.1     | Detected   | 9.8      | Not Detect | Ackr2       | 0.521276596 | 0.96276596 | 0.875      | 1.6160714 |
| A_55_P2014 | 18.8     | Detected | 26.8    | Detected   | 9.1      | Not Detect | 9.8      | Not Detect | Vmn1r41     | 0.521276596 | 0.48404255 | 0.36567164 | 0.3395522 |
| A_52_P3601 | 613.7    | Detected | 342     | Detected   | 264.8    | Detected   | 319.7    | Detected   | Clip2       | 0.520938569 | 0.43148118 | 0.93479532 | 0.774269  |
| A_55_P1959 | 21.7     | Detected | 46.1    | Detected   | 16.5     | Not Detect | 11.3     | Not Detect | Gm13119     | 0.520737327 | 0.76036866 | 0.24511931 | 0.3579176 |

|            |                  |                  |                  |                  |               |             |            |            |           |
|------------|------------------|------------------|------------------|------------------|---------------|-------------|------------|------------|-----------|
| A_55_P2109 | 19.4 Detected    | 9.3 Not Detect   | 5.5 Not Detect   | 10.1 Not Detect  | Olfr1065      | 0.520618557 | 0.28350515 | 1.08602151 | 0.5913978 |
| A_55_P2148 | 19.4 Detected    | 26.9 Detected    | 18.6 Detected    | 10.1 Not Detect  | Zan           | 0.520618557 | 0.95876289 | 0.37546468 | 0.6914498 |
| A_66_P1253 | 831.7 Detected   | 605 Detected     | 529.4 Detected   | 432.9 Detected   | Ccne1         | 0.52050018  | 0.63652759 | 0.71553719 | 0.8750413 |
| A_66_P1044 | 8726 Detected    | 6131.9 Detected  | 2903.9 Detected  | 4541 Detected    | Ckap4         | 0.520398808 | 0.33278707 | 0.74055535 | 0.4735726 |
| A_55_P2184 | 188.4 Detected   | 331.7 Detected   | 118.2 Detected   | 98 Detected      | Gm10387       | 0.520169851 | 0.62738854 | 0.29544769 | 0.3563461 |
| A_51_P4089 | 21856.8 Detected | 15638.2 Detected | 13554.4 Detected | 11367.4 Detected | Ccne1         | 0.520085282 | 0.62014568 | 0.72689952 | 0.8667494 |
| A_55_P2038 | 17.5 Detected    | 18.8 Detected    | 22 Detected      | 9.1 Not Detect   | Fam49a        | 0.52        | 1.25714286 | 0.48404255 | 1.1702128 |
| A_51_P2093 | 1167.8 Detected  | 1266.6 Detected  | 151 Detected     | 607.1 Detected   | Apln          | 0.519866415 | 0.12930296 | 0.4793147  | 0.1192168 |
| A_55_P1952 | 35.6 Detected    | 26.6 Detected    | 24.6 Detected    | 18.5 Not Detect  | Gm833         | 0.519662921 | 0.69101124 | 0.69548872 | 0.924812  |
| A_55_P2066 | 49.1 Detected    | 26.2 Detected    | 31.6 Detected    | 25.5 Not Detect  | Med28         | 0.519348269 | 0.64358452 | 0.97328244 | 1.2061069 |
| A_55_P2036 | 4426.2 Detected  | 4482.5 Detected  | 968.3 Detected   | 2298.2 Detected  | Bdnf          | 0.519226424 | 0.21876553 | 0.51270496 | 0.2160178 |
| A_52_P3537 | 2095.7 Detected  | 801.6 Detected   | 1096.3 Detected  | 1087.9 Detected  | Plagl2        | 0.51911056  | 0.52311877 | 1.35716068 | 1.3676397 |
| A_66_P1175 | 76.3 Detected    | 47.3 Detected    | 56.6 Detected    | 39.6 Not Detect  | A830049F12Rik | 0.519003932 | 0.74180865 | 0.8372093  | 1.1966173 |
| A_55_P2054 | 479.1 Detected   | 324.9 Detected   | 303.4 Detected   | 248.6 Detected   | Camsap2       | 0.518889585 | 0.63327072 | 0.76515851 | 0.9338258 |
| A_51_P2905 | 1088.4 Detected  | 1345.1 Detected  | 693.5 Detected   | 564.7 Detected   | Plk2          | 0.518834987 | 0.63717383 | 0.41982009 | 0.5155751 |
| A_52_P4026 | 928.6 Detected   | 496.9 Detected   | 563.6 Detected   | 481.6 Detected   | Ninl          | 0.518630196 | 0.60693517 | 0.9692091  | 1.1342322 |
| A_55_P1973 | 34.9 Detected    | 73.3 Detected    | 33.4 Detected    | 18.1 Not Detect  | Spn           | 0.518624642 | 0.95702006 | 0.24693042 | 0.4556617 |
| A_51_P3661 | 16.4 Detected    | 23.2 Detected    | 8 Not Detect     | 8.5 Not Detect   | Mertk         | 0.518292683 | 0.48780488 | 0.36637931 | 0.3448276 |
| A_51_P2048 | 16228.3 Detected | 7390.8 Detected  | 9812.8 Detected  | 8407.5 Detected  | Celf1         | 0.518076447 | 0.60467209 | 1.13756292 | 1.3277047 |
| A_55_P2143 | 2137.8 Detected  | 1418.2 Detected  | 1845.3 Detected  | 1107.2 Detected  | Qk            | 0.517915614 | 0.8631771  | 0.78070794 | 1.3011564 |
| A_55_P2182 | 19.7 Detected    | 10.4 Not Detect  | 11.2 Not Detect  | 10.2 Not Detect  | Plcg1         | 0.517766497 | 0.56852792 | 0.98076923 | 1.0769231 |
| A_52_P2541 | 580 Detected     | 321.1 Detected   | 481.3 Detected   | 300.3 Detected   | Nr3c1         | 0.517758621 | 0.82982759 | 0.93522267 | 1.49891   |
| A_55_P2114 | 3068.8 Detected  | 5154.8 Detected  | 1660.2 Detected  | 1588.7 Detected  | Dynap         | 0.517694213 | 0.54099322 | 0.30819818 | 0.3220688 |
| A_55_P2097 | 648.7 Detected   | 275.7 Detected   | 100.4 Detected   | 335.8 Detected   | Nkx1-1        | 0.517650686 | 0.15477108 | 1.21799057 | 0.3641639 |
| A_55_P2009 | 48.3 Detected    | 33.4 Detected    | 13.3 Not Detect  | 25 Not Detect    | S100ppb       | 0.517598344 | 0.27536232 | 0.74850299 | 0.3982036 |
| A_52_P1766 | 1751.6 Detected  | 850.4 Detected   | 1037.2 Detected  | 906.6 Detected   | Atat1         | 0.517583923 | 0.59214433 | 1.06608655 | 1.2196613 |
| A_55_P2038 | 246 Detected     | 190.1 Detected   | 140.3 Detected   | 127.3 Detected   | Tyro3         | 0.517479675 | 0.5703252  | 0.66964755 | 0.7380326 |
| A_55_P2071 | 201 Detected     | 118.1 Detected   | 69 Detected      | 104 Detected     | Nav2          | 0.517412935 | 0.34328358 | 0.88060965 | 0.5842506 |
| A_55_P2095 | 240.7 Detected   | 530.2 Detected   | 106.3 Detected   | 124.5 Detected   | Ubash3b       | 0.517241379 | 0.44162858 | 0.23481705 | 0.2004904 |
| A_55_P2121 | 1179.6 Detected  | 330.2 Detected   | 340 Detected     | 610 Detected     | Gpr137b       | 0.517124449 | 0.2882333  | 1.84736523 | 1.029679  |
| A_52_P2328 | 1254.1 Detected  | 1120.9 Detected  | 1306.6 Detected  | 648.5 Detected   | Ets1          | 0.517103899 | 1.04186269 | 0.57855295 | 1.1656704 |
| A_55_P2003 | 64.6 Detected    | 44.4 Detected    | 45 Detected      | 33.4 Not Detect  | Magel2        | 0.517027864 | 0.69659443 | 0.75225225 | 1.0135135 |
| A_52_P5949 | 1538.6 Detected  | 965.7 Detected   | 1523.8 Detected  | 794.9 Detected   | Atl3          | 0.516638503 | 0.99038087 | 0.82313348 | 1.5779228 |
| A_51_P4346 | 4444.3 Detected  | 2819.8 Detected  | 3949.5 Detected  | 2295.8 Detected  | Qk            | 0.516571789 | 0.88866638 | 0.81417122 | 1.4006313 |
| A_55_P2179 | 27.3 Detected    | 12.4 Not Detect  | 18.3 Detected    | 14.1 Not Detect  | Pinc          | 0.516483516 | 0.67032967 | 1.13709677 | 1.4758065 |
| A_55_P2031 | 65.7 Detected    | 18 Detected      | 93.9 Detected    | 33.9 Not Detect  | Fam131a       | 0.515981735 | 1.42922374 | 1.88333333 | 5.2166667 |
| A_66_P1205 | 40141.7 Detected | 31900 Detected   | 30109.7 Detected | 20699.6 Detected | Anxa1         | 0.515663263 | 0.75008532 | 0.64889028 | 0.9438777 |
| A_51_P1993 | 792 Detected     | 375.3 Detected   | 472.5 Detected   | 408.3 Detected   | Elmo2         | 0.515530303 | 0.59659091 | 1.08792966 | 1.2589928 |
| A_51_P4166 | 9995.6 Detected  | 7808.2 Detected  | 5682.4 Detected  | 5152.7 Detected  | Ext1          | 0.515496819 | 0.56849014 | 0.65990881 | 0.7277478 |
| A_55_P2140 | 22.9 Detected    | 15.3 Not Detect  | 24.2 Detected    | 11.8 Not Detect  | Wap           | 0.515283843 | 1.05676856 | 0.77124183 | 1.5816993 |



|            |         |          |         |            |         |            |         |            |               |             |            |            |           |
|------------|---------|----------|---------|------------|---------|------------|---------|------------|---------------|-------------|------------|------------|-----------|
| A_52_P3496 | 569.9   | Detected | 361.9   | Detected   | 421.2   | Detected   | 293.5   | Detected   | Copg1         | 0.515002632 | 0.73907703 | 0.81099751 | 1.1638574 |
| A_55_P2102 | 7417.4  | Detected | 7034.4  | Detected   | 6700.2  | Detected   | 3818.3  | Detected   | Stambpl1      | 0.514776067 | 0.90330844 | 0.54280393 | 0.9524906 |
| A_51_P2237 | 5356.4  | Detected | 3366.2  | Detected   | 3949.9  | Detected   | 2756.3  | Detected   | Pask          | 0.514580689 | 0.73741692 | 0.81881647 | 1.1734003 |
| A_55_P2167 | 796.6   | Detected | 915.1   | Detected   | 226.8   | Detected   | 409.8   | Detected   | Cdk14         | 0.514436355 | 0.28471002 | 0.44781991 | 0.2478418 |
| A_55_P2074 | 1953.3  | Detected | 1519.6  | Detected   | 1114.2  | Detected   | 1004.5  | Detected   | Tctn1         | 0.514257922 | 0.57041929 | 0.66102922 | 0.7332193 |
| A_51_P2912 | 38.9    | Detected | 22.7    | Detected   | 35.3    | Detected   | 20      | Not Detect | Mobp          | 0.514138817 | 0.90745501 | 0.88105727 | 1.5550661 |
| A_55_P2079 | 318.1   | Detected | 192.2   | Detected   | 237.4   | Detected   | 163.5   | Detected   | Prl6a1        | 0.513989312 | 0.74630619 | 0.85067638 | 1.2351717 |
| A_55_P2071 | 17.9    | Detected | 11.8    | Not Detect | 15.6    | Not Detect | 9.2     | Not Detect | Trh           | 0.51396648  | 0.87150838 | 0.77966102 | 1.3220339 |
| A_55_P2315 | 17.9    | Detected | 17      | Detected   | 12.3    | Not Detect | 9.2     | Not Detect | Ttl8          | 0.51396648  | 0.68715084 | 0.54117647 | 0.7235294 |
| A_51_P1648 | 17788.2 | Detected | 3743.4  | Detected   | 12670.5 | Detected   | 9141.7  | Detected   | Ppl           | 0.51391934  | 0.71229804 | 2.44208474 | 3.3847572 |
| A_52_P3273 | 459.7   | Detected | 469.6   | Detected   | 113.4   | Detected   | 236.2   | Detected   | Fndc4         | 0.513813357 | 0.24668262 | 0.50298126 | 0.2414821 |
| A_55_P2112 | 18.1    | Detected | 27.8    | Detected   | 19      | Detected   | 9.3     | Not Detect | BC051628      | 0.513812155 | 1.04972376 | 0.33453237 | 0.6834532 |
| A_55_P1962 | 5052.5  | Detected | 5029.8  | Detected   | 2455.4  | Detected   | 2596    | Detected   | Cplx2         | 0.513805047 | 0.48597724 | 0.5161239  | 0.4881705 |
| A_55_P2038 | 380     | Detected | 44.4    | Detected   | 69.2    | Detected   | 195.2   | Detected   | Acot5         | 0.513684211 | 0.18210526 | 4.3963964  | 1.5585586 |
| A_55_P2024 | 687.4   | Detected | 228.5   | Detected   | 618.3   | Detected   | 353.1   | Detected   | Tbkbp1        | 0.513674716 | 0.89947629 | 1.5452954  | 2.7059081 |
| A_52_P2453 | 497.4   | Detected | 268.6   | Detected   | 354.4   | Detected   | 255.5   | Detected   | Rtf1          | 0.51367109  | 0.71250503 | 0.95122859 | 1.3194341 |
| A_55_P2439 | 66.6    | Detected | 29.4    | Detected   | 40.1    | Detected   | 34.2    | Not Detect | R74862        | 0.513513514 | 0.6021021  | 1.16326531 | 1.3639456 |
| A_55_P1954 | 148     | Detected | 70      | Detected   | 83.6    | Detected   | 76      | Detected   | Plagl2        | 0.513513514 | 0.56486486 | 1.08571429 | 1.1942857 |
| A_51_P1256 | 23.2    | Detected | 21      | Detected   | 15.6    | Not Detect | 11.9    | Not Detect | Vwce          | 0.512931034 | 0.67241379 | 0.56666667 | 0.7428571 |
| A_55_P1964 | 23.8    | Detected | 51.5    | Detected   | 11.2    | Not Detect | 12.2    | Not Detect | Cd164l2       | 0.512605042 | 0.47058824 | 0.2368932  | 0.2174757 |
| A_51_P1697 | 84381.3 | Detected | 66286.2 | Detected   | 14114.3 | Detected   | 43251.1 | Detected   | Tuba1a        | 0.512567358 | 0.1672681  | 0.65249026 | 0.2129297 |
| A_55_P1972 | 225.6   | Detected | 155.9   | Detected   | 150.1   | Detected   | 115.6   | Detected   | Ly6g5b        | 0.512411348 | 0.66533688 | 0.74150096 | 0.9627967 |
| A_55_P1979 | 74      | Detected | 4.1     | Not Detect | 459.1   | Detected   | 37.9    | Not Detect | Kcne2         | 0.512162162 | 6.20405405 | 9.24390244 | 111.97561 |
| A_55_P1973 | 10050.5 | Detected | 5704.8  | Detected   | 6811.4  | Detected   | 5146.1  | Detected   | Gamt          | 0.512024277 | 0.67771753 | 0.90206493 | 1.193977  |
| A_66_P1106 | 4840.1  | Detected | 5466.7  | Detected   | 1413.1  | Detected   | 2477.7  | Detected   | Apol9b        | 0.511910911 | 0.29195678 | 0.45323504 | 0.2584923 |
| A_55_P2129 | 1238.4  | Detected | 929.3   | Detected   | 691.8   | Detected   | 633.8   | Detected   | Chd7          | 0.511789406 | 0.55862403 | 0.68201872 | 0.7444313 |
| A_55_P1996 | 17      | Detected | 14.1    | Not Detect | 14.4    | Not Detect | 8.7     | Not Detect | Grm8          | 0.511764706 | 0.84705882 | 0.61702128 | 1.0212766 |
| A_55_P1991 | 26.2    | Detected | 27.5    | Detected   | 19      | Detected   | 13.4    | Not Detect | Zfp407        | 0.511450382 | 0.72519084 | 0.48727273 | 0.6909091 |
| A_51_P5139 | 280.3   | Detected | 193.3   | Detected   | 189.7   | Detected   | 143.3   | Detected   | Spag4         | 0.511237959 | 0.67677488 | 0.74133471 | 0.9813761 |
| A_55_P2151 | 26937.4 | Detected | 19527.8 | Detected   | 16322.4 | Detected   | 13768.1 | Detected   | Rarg          | 0.511114658 | 0.60593821 | 0.70505126 | 0.8358545 |
| A_51_P4736 | 148.5   | Detected | 103.8   | Detected   | 100.6   | Detected   | 75.9    | Detected   | B230216G23Rik | 0.511111111 | 0.67744108 | 0.73121387 | 0.9691715 |
| A_51_P2677 | 213.9   | Detected | 173.5   | Detected   | 69.5    | Detected   | 109.3   | Detected   | Il11          | 0.510986442 | 0.32491819 | 0.62997118 | 0.4005764 |
| A_55_P1955 | 9869.7  | Detected | 6368.4  | Detected   | 6787    | Detected   | 5040.6  | Detected   | Cbfa2t2       | 0.510714611 | 0.68766021 | 0.79150179 | 1.0657308 |
| A_55_P2391 | 19      | Detected | 5.3     | Not Detect | 9       | Not Detect | 9.7     | Not Detect | D430047D06Rik | 0.510526316 | 0.47368421 | 1.83018868 | 1.6981132 |
| A_55_P2165 | 257.2   | Detected | 34.6    | Detected   | 432.9   | Detected   | 131.3   | Detected   | Acnat2        | 0.510497667 | 1.68312597 | 3.79479769 | 12.511561 |
| A_55_P2026 | 46996.2 | Detected | 31136.4 | Detected   | 27025.3 | Detected   | 23988.6 | Detected   | Igsf8         | 0.510437014 | 0.57505288 | 0.77043589 | 0.8679648 |
| A_55_P2059 | 52.6    | Detected | 27.5    | Detected   | 15      | Not Detect | 26.8    | Not Detect | Soga1         | 0.509505703 | 0.2851711  | 0.97454545 | 0.5454545 |
| A_52_P5101 | 286.9   | Detected | 257.4   | Detected   | 291.7   | Detected   | 146     | Detected   | Nudt15        | 0.508888114 | 1.01673057 | 0.56721057 | 1.1332556 |
| A_52_P6717 | 95.7    | Detected | 56.8    | Detected   | 70.3    | Detected   | 48.7    | Detected   | Adamts10      | 0.508881923 | 0.73458725 | 0.85739437 | 1.2376761 |
| A_51_P4816 | 3386.3  | Detected | 2238.4  | Detected   | 2282.3  | Detected   | 1723.2  | Detected   | Mbip          | 0.508873992 | 0.67398045 | 0.7698356  | 1.0196122 |

|            |         |          |        |            |        |            |        |            |               |             |            |            |           |
|------------|---------|----------|--------|------------|--------|------------|--------|------------|---------------|-------------|------------|------------|-----------|
| A_55_P2156 | 615.9   | Detected | 631.2  | Detected   | 272.8  | Detected   | 313.4  | Detected   | Cdk5r1        | 0.508848839 | 0.44292905 | 0.49651458 | 0.4321926 |
| A_55_P2164 | 154.3   | Detected | 86.7   | Detected   | 92.4   | Detected   | 78.5   | Detected   | Gm8556        | 0.50874919  | 0.59883344 | 0.90542099 | 1.0657439 |
| A_51_P2123 | 650.7   | Detected | 196.4  | Detected   | 473    | Detected   | 330.9  | Detected   | Cxadr         | 0.508529276 | 0.72690948 | 1.68482688 | 2.4083503 |
| A_52_P1155 | 18.3    | Detected | 9.2    | Not Detect | 8.2    | Not Detect | 9.3    | Not Detect | Spem1         | 0.508196721 | 0.44808743 | 1.01086957 | 0.8913043 |
| A_55_P2423 | 18.7    | Detected | 15.7   | Detected   | 4.1    | Not Detect | 9.5    | Not Detect | B230369F24Rik | 0.50802139  | 0.21925134 | 0.60509554 | 0.2611465 |
| A_55_P1974 | 163     | Detected | 117.6  | Detected   | 89.4   | Detected   | 82.7   | Detected   | Tnfrsf23      | 0.507361963 | 0.54846626 | 0.70323129 | 0.7602041 |
| A_55_P1973 | 27.8    | Detected | 14.9   | Not Detect | 19.6   | Detected   | 14.1   | Not Detect | Vmn2r55       | 0.507194245 | 0.70503597 | 0.94630872 | 1.3154362 |
| A_55_P2408 | 2452.6  | Detected | 1035.4 | Detected   | 1072   | Detected   | 1243.2 | Detected   | BB166591      | 0.506890647 | 0.43708717 | 1.20069538 | 1.0353487 |
| A_55_P2107 | 208.8   | Detected | 142.9  | Detected   | 113.7  | Detected   | 105.8  | Detected   | Ptch1         | 0.506704981 | 0.54454023 | 0.74037789 | 0.7956613 |
| A_55_P2106 | 16.6    | Detected | 18.2   | Detected   | 5.5    | Not Detect | 8.4    | Not Detect | Pde8a         | 0.506024096 | 0.3313253  | 0.46153846 | 0.3021978 |
| A_52_P6604 | 17      | Detected | 13.5   | Not Detect | 8      | Not Detect | 8.6    | Not Detect | Spo11         | 0.505882353 | 0.47058824 | 0.63703704 | 0.5925926 |
| A_51_P2560 | 5185.6  | Detected | 4170.9 | Detected   | 5181.5 | Detected   | 2623.1 | Detected   | Map2k6        | 0.505843104 | 0.99920935 | 0.62890503 | 1.2422978 |
| A_55_P1963 | 36      | Detected | 29.6   | Detected   | 21.1   | Detected   | 18.2   | Not Detect | Hcfc1         | 0.505555556 | 0.58611111 | 0.61486486 | 0.7128378 |
| A_55_P2007 | 18      | Detected | 22     | Detected   | 3.2    | Not Detect | 9.1    | Not Detect | 4933402N22Rik | 0.505555556 | 0.17777778 | 0.41363636 | 0.1454545 |
| A_51_P1443 | 1054.1  | Detected | 729.8  | Detected   | 3181.2 | Detected   | 532.9  | Detected   | Dtx4          | 0.505549758 | 3.01792999 | 0.73020005 | 4.3590025 |
| A_55_P2064 | 27.1    | Detected | 26.2   | Detected   | 11.1   | Not Detect | 13.7   | Not Detect | Trim58        | 0.505535055 | 0.4095941  | 0.52290076 | 0.4236641 |
| A_51_P5130 | 18.6    | Detected | 27.5   | Detected   | 32.9   | Detected   | 9.4    | Not Detect | Rad9b         | 0.505376344 | 1.7688172  | 0.34181818 | 1.1963636 |
| A_55_P2025 | 18.6    | Detected | 51.2   | Detected   | 3.4    | Not Detect | 9.4    | Not Detect | Ttc12         | 0.505376344 | 0.1827957  | 0.18359375 | 0.0664063 |
| A_51_P1633 | 19      | Detected | 13.6   | Not Detect | 3.5    | Not Detect | 9.6    | Not Detect | Ogdhl         | 0.505263158 | 0.18421053 | 0.70588235 | 0.2573529 |
| A_55_P1972 | 19.2    | Detected | 15     | Not Detect | 13.1   | Not Detect | 9.7    | Not Detect | Celf5         | 0.505208333 | 0.68229167 | 0.64666667 | 0.8733333 |
| A_55_P1960 | 1897.4  | Detected | 1586   | Detected   | 1367.5 | Detected   | 958.2  | Detected   | Gm4470        | 0.505006851 | 0.72072309 | 0.60416141 | 0.862232  |
| A_55_P1967 | 1670.7  | Detected | 1300.1 | Detected   | 1404.8 | Detected   | 843.7  | Detected   | Wipi2         | 0.504997905 | 0.84084515 | 0.64895008 | 1.0805323 |
| A_51_P2474 | 8651.6  | Detected | 3319.2 | Detected   | 4998   | Detected   | 4368.9 | Detected   | Adck1         | 0.504981737 | 0.57769661 | 1.3162509  | 1.5057845 |
| A_55_P2025 | 21.4    | Detected | 18.7   | Not Detect | 8.3    | Not Detect | 10.8   | Not Detect | Plcb4         | 0.504672897 | 0.38785047 | 0.57754011 | 0.4438503 |
| A_55_P2314 | 591.4   | Detected | 295.1  | Detected   | 344.3  | Detected   | 298.4  | Detected   | Secisbp2l     | 0.504565438 | 0.58217788 | 1.01118265 | 1.1667231 |
| A_55_P2032 | 244.2   | Detected | 189.1  | Detected   | 172.7  | Detected   | 123.2  | Detected   | LOC101055917  | 0.504504505 | 0.70720721 | 0.65150714 | 0.9132734 |
| A_66_P1372 | 22.4    | Detected | 24     | Detected   | 9.6    | Not Detect | 11.3   | Not Detect | A730045E13Rik | 0.504464286 | 0.42857143 | 0.47083333 | 0.4       |
| A_51_P3343 | 6320.6  | Detected | 6444   | Detected   | 3275   | Detected   | 3186.8 | Detected   | Tspan14       | 0.50419264  | 0.51814701 | 0.49453755 | 0.5082247 |
| A_52_P2919 | 1122.2  | Detected | 717.6  | Detected   | 280.9  | Detected   | 565.4  | Detected   | Stau2         | 0.503831759 | 0.25031189 | 0.78790412 | 0.3914437 |
| A_51_P3060 | 131.8   | Detected | 40.6   | Detected   | 43.5   | Detected   | 66.3   | Detected   | Dll1          | 0.503034901 | 0.33004552 | 1.63300493 | 1.0714286 |
| A_55_P1999 | 13936.3 | Detected | 5746.4 | Detected   | 7568.7 | Detected   | 7008.4 | Detected   | Pkdcc         | 0.502888141 | 0.5430925  | 1.21961576 | 1.3171203 |
| A_55_P1962 | 17.7    | Detected | 19     | Detected   | 7.4    | Not Detect | 8.9    | Not Detect | Dio3os        | 0.502824859 | 0.4180791  | 0.46842105 | 0.3894737 |
| A_51_P5144 | 18.7    | Detected | 165.5  | Detected   | 53.3   | Detected   | 9.4    | Not Detect | Slc2a5        | 0.502673797 | 2.85026738 | 0.05679758 | 0.3220544 |
| A_52_P5089 | 19.1    | Detected | 3.4    | Not Detect | 3.4    | Not Detect | 9.6    | Not Detect | Abca6         | 0.502617801 | 0.17801047 | 2.82352941 | 1         |
| A_55_P2093 | 19.5    | Detected | 20.9   | Detected   | 5.6    | Not Detect | 9.8    | Not Detect | Chl1          | 0.502564103 | 0.28717949 | 0.46889952 | 0.2679426 |
| A_52_P4734 | 20.5    | Detected | 5.1    | Not Detect | 10.9   | Not Detect | 10.3   | Not Detect | Epb4.114a     | 0.502439024 | 0.53170732 | 2.01960784 | 2.1372549 |
| A_52_P2273 | 12104.5 | Detected | 7645.6 | Detected   | 8434.8 | Detected   | 6080   | Detected   | Mllt1         | 0.502292536 | 0.69683176 | 0.79522863 | 1.1032228 |
| A_65_P1988 | 23.7    | Detected | 42.6   | Detected   | 26.7   | Detected   | 11.9   | Not Detect | Tmem92        | 0.502109705 | 1.12658228 | 0.27934272 | 0.6267606 |
| A_55_P2107 | 5505.7  | Detected | 1507.1 | Detected   | 1559.7 | Detected   | 2763.3 | Detected   | Gpr137b       | 0.501898033 | 0.28328823 | 1.83352133 | 1.0349015 |
| A_52_P6479 | 10457.4 | Detected | 4725.9 | Detected   | 5562   | Detected   | 5248.1 | Detected   | Gna12         | 0.501855146 | 0.53187217 | 1.11049747 | 1.1769187 |

|            |         |          |         |            |         |            |         |            |               |             |            |            |           |
|------------|---------|----------|---------|------------|---------|------------|---------|------------|---------------|-------------|------------|------------|-----------|
| A_55_P2115 | 90114.8 | Detected | 71242.5 | Detected   | 15760.3 | Detected   | 45200.5 | Detected   | Tuba1a        | 0.501587974 | 0.17489136 | 0.63445977 | 0.2212205 |
| A_55_P2182 | 35.3    | Detected | 38.1    | Detected   | 17.5    | Detected   | 17.7    | Not Detect | Neurog3       | 0.501416431 | 0.49575071 | 0.46456693 | 0.4593176 |
| A_51_P4649 | 1379.7  | Detected | 399.1   | Detected   | 311.1   | Detected   | 690.8   | Detected   | Msrb2         | 0.500688555 | 0.2254838  | 1.73089451 | 0.7795039 |
| A_55_P2169 | 74.9    | Detected | 33.4    | Detected   | 42.4    | Detected   | 37.5    | Not Detect | Gm13152       | 0.500667557 | 0.56608812 | 1.12275449 | 1.2694611 |
| A_55_P2002 | 272.5   | Detected | 127     | Detected   | 55.7    | Detected   | 136.4   | Detected   | Msx3          | 0.500550459 | 0.20440367 | 1.07401575 | 0.4385827 |
| A_55_P2001 | 17.8    | Detected | 8.6     | Not Detect | 3.2     | Not Detect | 8.9     | Not Detect | Tnfaip6       | 0.5         | 0.17977528 | 1.03488372 | 0.372093  |
| A_55_P2129 | 38.8    | Detected | 20.9    | Detected   | 32.4    | Detected   | 19.4    | Not Detect | LOC100861614  | 0.5         | 0.83505155 | 0.92822967 | 1.5502392 |
| A_65_P0886 | 120.2   | Detected | 74.6    | Detected   | 87.3    | Detected   | 60.1    | Detected   | Zbtb37        | 0.5         | 0.72628952 | 0.80563003 | 1.1702413 |
| A_66_P1192 | 20.4    | Detected | 13      | Not Detect | 3.7     | Not Detect | 10.2    | Not Detect | Gm17757       | 0.5         | 0.18137255 | 0.78461538 | 0.2846154 |
| A_51_P5145 | 22.2    | Detected | 16.5    | Detected   | 11.9    | Not Detect | 11.1    | Not Detect | Tbata         | 0.5         | 0.53603604 | 0.67272727 | 0.7212121 |
| A_55_P2127 | 20.2    | Detected | 15.3    | Not Detect | 16.1    | Not Detect | 10.1    | Not Detect | Olfra432      | 0.5         | 0.7970297  | 0.66013072 | 1.0522876 |
| A_55_P2222 | 20.8    | Detected | 20.3    | Detected   | 39.7    | Detected   | 10.4    | Not Detect | 4930435H24Rik | 0.5         | 1.90865385 | 0.51231527 | 1.955665  |
| A_51_P2666 | 94.9    | Detected | 41.6    | Detected   | 68.6    | Detected   | 47.4    | Not Detect | Peli3         | 0.49947313  | 0.72286617 | 1.13942308 | 1.6490385 |
| A_51_P5094 | 1452.2  | Detected | 986.7   | Detected   | 466.7   | Detected   | 724.9   | Detected   | Tmlhe         | 0.499173668 | 0.32137447 | 0.73467113 | 0.4729908 |
| A_51_P4922 | 1937.3  | Detected | 426.9   | Detected   | 672.1   | Detected   | 966.9   | Detected   | Aqp2          | 0.499096681 | 0.34692613 | 2.26493324 | 1.5743734 |
| A_55_P2014 | 5100.1  | Detected | 3693.7  | Detected   | 2311.7  | Detected   | 2544.3  | Detected   | Gatsl2        | 0.498872571 | 0.45326562 | 0.68882151 | 0.6258494 |
| A_55_P2414 | 3493.7  | Detected | 2820.2  | Detected   | 2480    | Detected   | 1742.5  | Detected   | Luc7l         | 0.498754902 | 0.70984916 | 0.61786398 | 0.8793703 |
| A_51_P4112 | 42517.9 | Detected | 14488.3 | Detected   | 38866.4 | Detected   | 21173.5 | Detected   | Nfe2l2        | 0.497990258 | 0.91411852 | 1.46142059 | 2.682606  |
| A_55_P1966 | 21.1    | Detected | 8.1     | Not Detect | 3.7     | Not Detect | 10.5    | Not Detect | Cyp2r1        | 0.497630332 | 0.17535545 | 1.2962963  | 0.4567901 |
| A_55_P2000 | 6781.5  | Detected | 5386.5  | Detected   | 4982.5  | Detected   | 3374.3  | Detected   | Cops2         | 0.497574283 | 0.73471946 | 0.62643646 | 0.9249977 |
| A_51_P1931 | 19.3    | Detected | 15.4    | Not Detect | 14.8    | Not Detect | 9.6     | Not Detect | Ms4a6c        | 0.497409326 | 0.76683938 | 0.62337662 | 0.961039  |
| A_55_P2142 | 18.3    | Detected | 12.7    | Not Detect | 14.1    | Not Detect | 9.1     | Not Detect | Zfp420        | 0.49726776  | 0.7704918  | 0.71653543 | 1.1102362 |
| A_55_P2053 | 18.1    | Detected | 3.2     | Not Detect | 4.8     | Not Detect | 9       | Not Detect | Bdkrb2        | 0.497237569 | 0.26519337 | 2.8125     | 1.5       |
| A_51_P3183 | 200.6   | Detected | 178.9   | Detected   | 154.9   | Detected   | 99.7    | Detected   | Pgf           | 0.497008973 | 0.77218345 | 0.55729458 | 0.8658468 |
| A_55_P2043 | 32.8    | Detected | 28.2    | Detected   | 27.4    | Detected   | 16.3    | Not Detect | Ankmy1        | 0.49695122  | 0.83536585 | 0.57801418 | 0.9716312 |
| A_55_P1992 | 27.8    | Detected | 17.4    | Detected   | 20.4    | Detected   | 13.8    | Not Detect | Rergl         | 0.496402878 | 0.73381295 | 0.79310345 | 1.1724138 |
| A_66_P1016 | 12656.4 | Detected | 16060.9 | Detected   | 8947.7  | Detected   | 6280    | Detected   | Lamb1         | 0.49619165  | 0.70697039 | 0.39101171 | 0.5571107 |
| A_66_P1322 | 302.2   | Detected | 145.2   | Detected   | 193.7   | Detected   | 149.8   | Detected   | Gm4430        | 0.495698213 | 0.64096625 | 1.03168044 | 1.334022  |
| A_55_P2130 | 69.4    | Detected | 32      | Detected   | 31.7    | Detected   | 34.4    | Not Detect | Arl14ep       | 0.495677233 | 0.45677233 | 1.075      | 0.990625  |
| A_55_P2041 | 14123.5 | Detected | 6239.5  | Detected   | 4469.1  | Detected   | 6998.8  | Detected   | Tle3          | 0.49554289  | 0.31643006 | 1.12169244 | 0.7162593 |
| A_55_P2079 | 3194.3  | Detected | 1931.9  | Detected   | 1929.6  | Detected   | 1582.4  | Detected   | Spred1        | 0.4953824   | 0.60407601 | 0.81909002 | 0.9988095 |
| A_55_P2153 | 333.6   | Detected | 263.7   | Detected   | 136.5   | Detected   | 165.2   | Detected   | Dtnb          | 0.495203837 | 0.40917266 | 0.62646947 | 0.5176337 |
| A_52_P3086 | 707.4   | Detected | 77.7    | Detected   | 403.1   | Detected   | 350.3   | Detected   | Cpn1          | 0.495193667 | 0.56983319 | 4.50836551 | 5.1879022 |
| A_51_P3370 | 13801.2 | Detected | 9588.3  | Detected   | 11153.3 | Detected   | 6834.2  | Detected   | Gins1         | 0.495188824 | 0.80813987 | 0.71276452 | 1.1632198 |
| A_55_P2174 | 20.2    | Detected | 15.2    | Not Detect | 14      | Not Detect | 10      | Not Detect | AY761185      | 0.495049505 | 0.69306931 | 0.65789474 | 0.9210526 |
| A_66_P1224 | 49214.6 | Detected | 40039.6 | Detected   | 30534.2 | Detected   | 24354.3 | Detected   | Snhg6         | 0.494859249 | 0.62042971 | 0.60825533 | 0.7626    |
| A_51_P4728 | 18.8    | Detected | 9.1     | Not Detect | 17.7    | Detected   | 9.3     | Not Detect | Masp1         | 0.494680851 | 0.94148936 | 1.02197802 | 1.9450549 |
| A_51_P4591 | 18.4    | Detected | 8.6     | Not Detect | 14.9    | Not Detect | 9.1     | Not Detect | Serpina9e     | 0.494565217 | 0.80978261 | 1.05813953 | 1.7325581 |
| A_66_P1359 | 89.4    | Detected | 61.9    | Detected   | 46.1    | Detected   | 44.2    | Not Detect | Fam221a       | 0.494407159 | 0.51565996 | 0.71405493 | 0.7447496 |
| A_55_P2018 | 16.8    | Detected | 10.8    | Not Detect | 6.2     | Not Detect | 8.3     | Not Detect | Sycp3         | 0.494047619 | 0.36904762 | 0.76851852 | 0.5740741 |

|            |         |          |         |            |        |            |        |            |               |             |            |            |           |
|------------|---------|----------|---------|------------|--------|------------|--------|------------|---------------|-------------|------------|------------|-----------|
| A_52_P3571 | 623.5   | Detected | 466.1   | Detected   | 475.7  | Detected   | 307.9  | Detected   | Cep97         | 0.49382518  | 0.76295108 | 0.66058786 | 1.0205964 |
| A_55_P2095 | 218.8   | Detected | 102.6   | Detected   | 260    | Detected   | 108    | Detected   | Eil3          | 0.493601463 | 1.18829982 | 1.05263158 | 2.5341131 |
| A_55_P2026 | 21.5    | Detected | 15.4    | Not Detect | 11.1   | Not Detect | 10.6   | Not Detect | Fbxw20        | 0.493023256 | 0.51627907 | 0.68831169 | 0.7207792 |
| A_52_P3587 | 20.5    | Detected | 5.5     | Not Detect | 6.4    | Not Detect | 10.1   | Not Detect | Olf266        | 0.492682927 | 0.31219512 | 1.83636364 | 1.1636364 |
| A_55_P2190 | 2905    | Detected | 788.1   | Detected   | 1233.3 | Detected   | 1431.1 | Detected   | Sim2          | 0.492633391 | 0.42454389 | 1.81588631 | 1.5649029 |
| A_55_P2259 | 20.3    | Detected | 6.7     | Not Detect | 15.5   | Not Detect | 10     | Not Detect | 4930554P06Rik | 0.492610837 | 0.7635468  | 1.49253731 | 2.3134328 |
| A_55_P1998 | 3074.8  | Detected | 797.9   | Detected   | 1153.3 | Detected   | 1513.6 | Detected   | Entpd5        | 0.492259659 | 0.37508131 | 1.89697957 | 1.4454192 |
| A_55_P2111 | 244.9   | Detected | 140.4   | Detected   | 110.8  | Detected   | 120.5  | Detected   | Gpsm1         | 0.492037566 | 0.45242956 | 0.85826211 | 0.7891738 |
| A_55_P1998 | 217.5   | Detected | 143     | Detected   | 129.3  | Detected   | 107    | Detected   | Eif2ak4       | 0.491954023 | 0.59448276 | 0.74825175 | 0.9041958 |
| A_51_P3892 | 18.3    | Detected | 20.2    | Detected   | 15.1   | Not Detect | 9      | Not Detect | Fam131b       | 0.491803279 | 0.82513661 | 0.44554455 | 0.7475248 |
| A_55_P2278 | 828.1   | Detected | 736.2   | Detected   | 657.8  | Detected   | 407.2  | Detected   | A330009N23Rik | 0.491728052 | 0.79434851 | 0.55311057 | 0.8935072 |
| A_55_P2152 | 17.3    | Detected | 3       | Not Detect | 5.7    | Not Detect | 8.5    | Not Detect | Lyz1l         | 0.49132948  | 0.32947977 | 2.83333333 | 1.9       |
| A_55_P2180 | 977.8   | Detected | 726.1   | Detected   | 829.2  | Detected   | 479.8  | Detected   | Gls           | 0.490693393 | 0.84802618 | 0.66079052 | 1.1419915 |
| A_51_P2830 | 19.6    | Detected | 18.8    | Detected   | 8.8    | Not Detect | 9.6    | Not Detect | Slc1a6        | 0.489795918 | 0.44897959 | 0.5106383  | 0.4680851 |
| A_55_P2396 | 19.4    | Detected | 6.8     | Not Detect | 6.3    | Not Detect | 9.5    | Not Detect | 4930473H19Rik | 0.489690722 | 0.32474227 | 1.39705882 | 0.9264706 |
| A_52_P2499 | 1895    | Detected | 989.3   | Detected   | 1483.3 | Detected   | 927.9  | Detected   | Zscan29       | 0.489656992 | 0.78274406 | 0.93793591 | 1.499343  |
| A_55_P2162 | 991.6   | Detected | 529.9   | Detected   | 914.6  | Detected   | 485.5  | Detected   | Pdp1          | 0.489612747 | 0.92234772 | 0.91621061 | 1.725986  |
| A_66_P1138 | 18.4    | Detected | 15.8    | Not Detect | 5.5    | Not Detect | 9      | Not Detect | Cdh3          | 0.489130435 | 0.29891304 | 0.56962025 | 0.3481013 |
| A_51_P2633 | 1886.9  | Detected | 738.7   | Detected   | 1171.9 | Detected   | 922    | Detected   | Rnf24         | 0.488632148 | 0.6210716  | 1.24813862 | 1.5864356 |
| A_52_P5367 | 55.5    | Detected | 11      | Not Detect | 20.3   | Detected   | 27.1   | Not Detect | Hpgds         | 0.488288288 | 0.36576577 | 2.46363636 | 1.8454545 |
| A_55_P2144 | 20.5    | Detected | 19.7    | Detected   | 12.5   | Not Detect | 10     | Not Detect | Usp17lc       | 0.487804878 | 0.6097561  | 0.50761421 | 0.6345178 |
| A_55_P2103 | 68.5    | Detected | 42      | Detected   | 37.4   | Detected   | 33.4   | Not Detect | Zfp366        | 0.487591241 | 0.5459854  | 0.7952381  | 0.8904762 |
| A_55_P2000 | 19.7    | Detected | 25      | Detected   | 15.7   | Not Detect | 9.6    | Not Detect | Lrrc30        | 0.487309645 | 0.79695431 | 0.384      | 0.628     |
| A_66_P1271 | 19.5    | Detected | 13.9    | Not Detect | 4.9    | Not Detect | 9.5    | Not Detect | Nrxn3         | 0.487179487 | 0.25128205 | 0.68345324 | 0.352518  |
| A_55_P2078 | 15570.6 | Detected | 13189.5 | Detected   | 9856.2 | Detected   | 7583.5 | Detected   | Etv4          | 0.487039677 | 0.63300066 | 0.57496493 | 0.7472762 |
| A_51_P2898 | 234.1   | Detected | 188.2   | Detected   | 134.1  | Detected   | 114    | Detected   | Ccdc138       | 0.48697138  | 0.57283212 | 0.60573858 | 0.7125399 |
| A_55_P2155 | 38      | Detected | 117.9   | Detected   | 5.1    | Not Detect | 18.5   | Not Detect | Spink13       | 0.486842105 | 0.13421053 | 0.15691264 | 0.043257  |
| A_55_P2039 | 601.5   | Detected | 384.5   | Detected   | 258.4  | Detected   | 292.8  | Detected   | Pak6          | 0.486783042 | 0.42959268 | 0.76150845 | 0.6720416 |
| A_55_P2125 | 175.3   | Detected | 139.4   | Detected   | 98.7   | Detected   | 85.3   | Detected   | Camkk2        | 0.48659441  | 0.5630348  | 0.61190818 | 0.7080344 |
| A_55_P2092 | 107.9   | Detected | 86      | Detected   | 62.1   | Detected   | 52.5   | Detected   | Serpina9      | 0.486561631 | 0.5755329  | 0.61046512 | 0.722093  |
| A_51_P2391 | 36.6    | Detected | 29.7    | Detected   | 25.5   | Detected   | 17.8   | Not Detect | Adam21        | 0.486338798 | 0.69672131 | 0.5993266  | 0.8585859 |
| A_52_P6808 | 1612.3  | Detected | 659.3   | Detected   | 491.3  | Detected   | 784    | Detected   | Ctxn1         | 0.486261862 | 0.30471997 | 1.18914    | 0.7451843 |
| A_55_P2175 | 18.1    | Detected | 3.1     | Not Detect | 3.2    | Not Detect | 8.8    | Not Detect | Gm11536       | 0.486187845 | 0.17679558 | 2.83870968 | 1.0322581 |
| A_52_P3220 | 18.1    | Detected | 7.2     | Not Detect | 3.2    | Not Detect | 8.8    | Not Detect | Patl2         | 0.486187845 | 0.17679558 | 1.22222222 | 0.4444444 |
| A_55_P1988 | 8818.8  | Detected | 4441.5  | Detected   | 8972.1 | Detected   | 4287.1 | Detected   | Eml4          | 0.4861319   | 1.01738332 | 0.96523697 | 2.0200608 |
| A_55_P1987 | 39.3    | Detected | 65      | Detected   | 26.4   | Detected   | 19.1   | Not Detect | Olf1383       | 0.486005089 | 0.67175573 | 0.29384615 | 0.4061538 |
| A_51_P3589 | 85.2    | Detected | 50.9    | Detected   | 57.7   | Detected   | 41.4   | Not Detect | Zfx           | 0.485915493 | 0.67723005 | 0.81335953 | 1.1335953 |
| A_55_P2046 | 31.7    | Detected | 44.4    | Detected   | 21.6   | Detected   | 15.4   | Not Detect | Kremen1       | 0.485804416 | 0.68138801 | 0.34684685 | 0.4864865 |
| A_55_P2019 | 71.5    | Detected | 77      | Detected   | 57.9   | Detected   | 34.7   | Not Detect | Gm10375       | 0.485314685 | 0.80979021 | 0.45064935 | 0.7519481 |
| A_55_P1973 | 27.2    | Detected | 28      | Detected   | 30.1   | Detected   | 13.2   | Not Detect | Gm2238        | 0.485294118 | 1.10661765 | 0.47142857 | 1.075     |

|            |         |          |         |            |         |            |         |            |               |             |            |            |           |
|------------|---------|----------|---------|------------|---------|------------|---------|------------|---------------|-------------|------------|------------|-----------|
| A_51_P3157 | 22022.5 | Detected | 14225.4 | Detected   | 14403.4 | Detected   | 10681.1 | Detected   | Tubb4a        | 0.485008514 | 0.6540311  | 0.75084708 | 1.0125128 |
| A_55_P2024 | 19.8    | Detected | 16.1    | Not Detect | 9.4     | Not Detect | 9.6     | Not Detect | Gm9973        | 0.484848485 | 0.47474747 | 0.59627329 | 0.5838509 |
| A_55_P2046 | 38.4    | Detected | 27.2    | Detected   | 33.5    | Detected   | 18.6    | Not Detect | Tmem44        | 0.484375    | 0.87239583 | 0.68382353 | 1.2316176 |
| A_52_P4106 | 33156.6 | Detected | 80049.6 | Detected   | 40064.3 | Detected   | 16058.9 | Detected   | Krt7          | 0.484334944 | 1.2083356  | 0.20061187 | 0.5004934 |
| A_55_P2089 | 5398.3  | Detected | 3156.9  | Detected   | 2877.4  | Detected   | 2613.5  | Detected   | Ssbp2         | 0.484133894 | 0.53301965 | 0.82786911 | 0.9114638 |
| A_55_P2326 | 18.2    | Detected | 9.7     | Not Detect | 9.8     | Not Detect | 8.8     | Not Detect | BC026513      | 0.483516484 | 0.53846154 | 0.90721649 | 1.0103093 |
| A_52_P5545 | 30.2    | Detected | 37.9    | Detected   | 10.4    | Not Detect | 14.6    | Not Detect | Tnfrsf26      | 0.483443709 | 0.34437086 | 0.38522427 | 0.2744063 |
| A_55_P2001 | 21.1    | Detected | 68.3    | Detected   | 20.2    | Detected   | 10.2    | Not Detect | Gm5600        | 0.483412322 | 0.95734597 | 0.14934114 | 0.295754  |
| A_55_P2093 | 9523.4  | Detected | 4768.5  | Detected   | 6537.9  | Detected   | 4598.7  | Detected   | Maged2        | 0.482884264 | 0.68650902 | 0.96439132 | 1.3710601 |
| A_52_P6970 | 12299.3 | Detected | 7297.8  | Detected   | 10481.4 | Detected   | 5938.3  | Detected   | Ergic1        | 0.482816095 | 0.85219484 | 0.81371098 | 1.4362411 |
| A_55_P2414 | 26.1    | Detected | 34.5    | Detected   | 35.1    | Detected   | 12.6    | Not Detect | 4732463B04Rik | 0.482758621 | 1.34482759 | 0.36521739 | 1.0173913 |
| A_51_P1686 | 530.7   | Detected | 380.4   | Detected   | 88.3    | Detected   | 256     | Detected   | Mast4         | 0.48238176  | 0.16638402 | 0.67297581 | 0.2321241 |
| A_55_P2075 | 39.2    | Detected | 12.6    | Not Detect | 16.5    | Detected   | 18.9    | Not Detect | Pax2          | 0.482142857 | 0.42091837 | 1.5        | 1.3095238 |
| A_55_P2185 | 2100.2  | Detected | 1821.6  | Detected   | 1721.7  | Detected   | 1012.2  | Detected   | Fermt2        | 0.4819541   | 0.81977907 | 0.55566535 | 0.9451581 |
| A_51_P3073 | 365     | Detected | 145.6   | Detected   | 320.4   | Detected   | 175.8   | Detected   | Rxra          | 0.481643836 | 0.87780822 | 1.20741758 | 2.2005495 |
| A_51_P1053 | 24.5    | Detected | 9.9     | Not Detect | 13.3    | Not Detect | 11.8    | Not Detect | 2010005H15Rik | 0.481632653 | 0.54285714 | 1.19191919 | 1.3434343 |
| A_65_P0888 | 464.3   | Detected | 362.8   | Detected   | 478.5   | Detected   | 223.5   | Detected   | Pabpc1l       | 0.481369804 | 1.03058367 | 0.6160419  | 1.3189085 |
| A_51_P5072 | 155.2   | Detected | 158.7   | Detected   | 77.6    | Detected   | 74.7    | Detected   | Fosl2         | 0.481314433 | 0.5        | 0.47069943 | 0.4889729 |
| A_55_P2170 | 21.4    | Detected | 15.8    | Not Detect | 29.2    | Detected   | 10.3    | Not Detect | A230103O09Rik | 0.481308411 | 1.36448598 | 0.65189873 | 1.8481013 |
| A_55_P2182 | 90.6    | Detected | 783.7   | Detected   | 25.8    | Detected   | 43.6    | Not Detect | Tnfsf15       | 0.481236203 | 0.28476821 | 0.05563353 | 0.0329208 |
| A_55_P1964 | 107.9   | Detected | 170.8   | Detected   | 72.9    | Detected   | 51.9    | Detected   | Megf10        | 0.481000927 | 0.67562558 | 0.30386417 | 0.426815  |
| A_55_P2039 | 1603.3  | Detected | 1308.3  | Detected   | 1013.3  | Detected   | 771.1   | Detected   | Itgav         | 0.48094555  | 0.63200898 | 0.58939081 | 0.7745165 |
| A_55_P1966 | 7198.8  | Detected | 3500.4  | Detected   | 4327.9  | Detected   | 3460.8  | Detected   | Limk1         | 0.480746791 | 0.60119742 | 0.98868701 | 1.2364016 |
| A_55_P2117 | 1497.9  | Detected | 1298.6  | Detected   | 1285.2  | Detected   | 719.9   | Detected   | Ppih          | 0.480606182 | 0.8580012  | 0.55436624 | 0.9896812 |
| A_55_P1988 | 5753.5  | Detected | 2870.6  | Detected   | 1799.3  | Detected   | 2762.1  | Detected   | Sestd1        | 0.480072999 | 0.31273138 | 0.96220302 | 0.6268028 |
| A_52_P6507 | 695     | Detected | 351.4   | Detected   | 543.6   | Detected   | 333.6   | Detected   | Zfp820        | 0.48        | 0.78215827 | 0.94934548 | 1.546955  |
| A_55_P2134 | 22.3    | Detected | 3.8     | Not Detect | 3.8     | Not Detect | 10.7    | Not Detect | Ms4a13        | 0.479820628 | 0.17040359 | 2.81578947 | 1         |
| A_66_P1057 | 28.4    | Detected | 31.9    | Detected   | 32.5    | Detected   | 13.6    | Not Detect | Gm10548       | 0.478873239 | 1.1443662  | 0.42633229 | 1.0188088 |
| A_51_P1561 | 21.3    | Detected | 28.6    | Detected   | 9.5     | Not Detect | 10.2    | Not Detect | Dbx1          | 0.478873239 | 0.44600939 | 0.35664336 | 0.3321678 |
| A_52_P5279 | 98      | Detected | 72.4    | Detected   | 67.4    | Detected   | 46.9    | Not Detect | Slc16a10      | 0.478571429 | 0.6877551  | 0.64779006 | 0.9309392 |
| A_55_P2095 | 137.5   | Detected | 83.1    | Detected   | 87.4    | Detected   | 65.8    | Detected   | Spata51l      | 0.478545455 | 0.63563636 | 0.79181709 | 1.0517449 |
| A_55_P2152 | 92      | Detected | 32.6    | Detected   | 294.7   | Detected   | 44      | Not Detect | Ihh           | 0.47826087  | 3.20326087 | 1.34969325 | 9.0398773 |
| A_52_P6503 | 20.5    | Detected | 75.6    | Detected   | 3.5     | Not Detect | 9.8     | Not Detect | Ccnjl         | 0.47804878  | 0.17073171 | 0.12962963 | 0.0462963 |
| A_55_P2180 | 18.2    | Detected | 25.3    | Detected   | 7       | Not Detect | 8.7     | Not Detect | 18100200O5Rik | 0.478021978 | 0.38461538 | 0.34387352 | 0.2766798 |
| A_55_P1992 | 423.9   | Detected | 219.4   | Detected   | 150.6   | Detected   | 202.3   | Detected   | Epb4.1l1      | 0.477235197 | 0.35527247 | 0.92206016 | 0.6864175 |
| A_66_P1147 | 21.8    | Detected | 34.6    | Detected   | 3.7     | Not Detect | 10.4    | Not Detect | Adamts6       | 0.47706422  | 0.16972477 | 0.30057803 | 0.1069364 |
| A_55_P1970 | 136.9   | Detected | 80.6    | Detected   | 56      | Detected   | 65.3    | Detected   | Fam221a       | 0.476990504 | 0.40905771 | 0.8101737  | 0.6947891 |
| A_55_P2014 | 145.3   | Detected | 822.2   | Detected   | 73.5    | Detected   | 69.3    | Detected   | Sema3a        | 0.476944253 | 0.50584997 | 0.08428606 | 0.0893943 |
| A_55_P2098 | 1343    | Detected | 673.9   | Detected   | 326.4   | Detected   | 639.9   | Detected   | Tpbg          | 0.476470588 | 0.24303797 | 0.94954741 | 0.4843449 |
| A_55_P2078 | 201.5   | Detected | 101.1   | Detected   | 147.8   | Detected   | 96      | Detected   | C4b           | 0.476426799 | 0.73349876 | 0.9495549  | 1.4619189 |

|            |         |          |         |            |         |            |         |            |               |             |            |            |           |
|------------|---------|----------|---------|------------|---------|------------|---------|------------|---------------|-------------|------------|------------|-----------|
| A_55_P2019 | 133.5   | Detected | 161.8   | Detected   | 83      | Detected   | 63.6    | Detected   | Zscan4c       | 0.476404494 | 0.62172285 | 0.39307787 | 0.512979  |
| A_51_P2825 | 25.2    | Detected | 39.5    | Detected   | 14.8    | Not Detect | 12      | Not Detect | C3ar1         | 0.476190476 | 0.58730159 | 0.30379747 | 0.3746835 |
| A_55_P2031 | 481.3   | Detected | 322.7   | Detected   | 364.4   | Detected   | 229.1   | Detected   | S100bbp       | 0.476002493 | 0.75711614 | 0.70994732 | 1.1292222 |
| A_55_P2064 | 20.8    | Detected | 16.7    | Not Detect | 11.7    | Not Detect | 9.9     | Not Detect | Gm4098        | 0.475961538 | 0.5625     | 0.59281437 | 0.7005988 |
| A_55_P1968 | 20.6    | Detected | 4.4     | Not Detect | 3.6     | Not Detect | 9.8     | Not Detect | Pla2g2c       | 0.475728155 | 0.17475728 | 2.22727273 | 0.8181818 |
| A_55_P2117 | 30.9    | Detected | 23.3    | Detected   | 24.7    | Detected   | 14.7    | Not Detect | Pak7          | 0.475728155 | 0.79935275 | 0.63090129 | 1.0600858 |
| A_55_P2197 | 28.6    | Detected | 20.2    | Detected   | 14      | Not Detect | 13.6    | Not Detect | D4Ertd58e     | 0.475524476 | 0.48951049 | 0.67326733 | 0.6930693 |
| A_55_P2073 | 25208.8 | Detected | 17021.3 | Detected   | 25082.8 | Detected   | 11987.2 | Detected   | Bin1          | 0.475516486 | 0.99500175 | 0.70424703 | 1.4736125 |
| A_51_P4977 | 20.4    | Detected | 6.3     | Not Detect | 3.5     | Not Detect | 9.7     | Not Detect | Wdr95         | 0.475490196 | 0.17156863 | 1.53968254 | 0.5555556 |
| A_55_P1979 | 1417.1  | Detected | 836.5   | Detected   | 1823.3  | Detected   | 673.7   | Detected   | Nuak2         | 0.475407522 | 1.28664173 | 0.80537956 | 2.1796772 |
| A_55_P2045 | 77.2    | Detected | 36.5    | Detected   | 38.1    | Detected   | 36.7    | Not Detect | 4921531P14Rik | 0.475388601 | 0.49352332 | 1.00547945 | 1.0438356 |
| A_51_P2788 | 454     | Detected | 2002.3  | Detected   | 131     | Detected   | 215.8   | Detected   | H2-DMb1       | 0.475330396 | 0.28854626 | 0.10777606 | 0.0654248 |
| A_52_P4723 | 339.2   | Detected | 273.4   | Detected   | 211.6   | Detected   | 161.2   | Detected   | Plxnd1        | 0.475235849 | 0.62382075 | 0.58961229 | 0.7739576 |
| A_51_P3592 | 2310.4  | Detected | 1309.9  | Detected   | 1872.7  | Detected   | 1097.2  | Detected   | Alcam         | 0.474896122 | 0.81055229 | 0.83762119 | 1.4296511 |
| A_51_P3868 | 80.9    | Detected | 52.2    | Detected   | 6.8     | Not Detect | 38.4    | Not Detect | Gm5577        | 0.474660074 | 0.08405439 | 0.73563218 | 0.1302682 |
| A_55_P2041 | 83.9    | Detected | 51.2    | Detected   | 46      | Detected   | 39.8    | Not Detect | Gm3970        | 0.474374255 | 0.54827175 | 0.77734375 | 0.8984375 |
| A_66_P1125 | 559.6   | Detected | 162.5   | Detected   | 922.7   | Detected   | 265.4   | Detected   | Shf           | 0.474267334 | 1.64885633 | 1.63323077 | 5.6781538 |
| A_51_P2097 | 3949.9  | Detected | 1114.8  | Detected   | 2141    | Detected   | 1872.9  | Detected   | Atoh8         | 0.474163903 | 0.54203904 | 1.68003229 | 1.9205239 |
| A_55_P2250 | 23.2    | Detected | 19.4    | Detected   | 9.8     | Not Detect | 11      | Not Detect | Pcdhgc5       | 0.474137931 | 0.42241379 | 0.56701031 | 0.5051546 |
| A_55_P2131 | 438.7   | Detected | 198.9   | Detected   | 226.7   | Detected   | 208     | Detected   | 9030624G23Rik | 0.474128106 | 0.51675405 | 1.04575163 | 1.1397687 |
| A_51_P2645 | 2216.7  | Detected | 1339.2  | Detected   | 1212.9  | Detected   | 1050.3  | Detected   | Fam69b        | 0.473812424 | 0.5471647  | 0.78427419 | 0.90569   |
| A_55_P2088 | 311.8   | Detected | 334.4   | Detected   | 791     | Detected   | 147.7   | Detected   | Tnnt1         | 0.47370109  | 2.53688262 | 0.4416866  | 2.3654306 |
| A_55_P2063 | 51.3    | Detected | 42.6    | Detected   | 23.3    | Detected   | 24.3    | Not Detect | Phc2          | 0.473684211 | 0.45419103 | 0.57042254 | 0.5469484 |
| A_55_P1960 | 36.1    | Detected | 36.8    | Detected   | 39.6    | Detected   | 17.1    | Not Detect | Satb2         | 0.473684211 | 1.09695291 | 0.46467391 | 1.076087  |
| A_51_P2711 | 20.9    | Detected | 41.6    | Detected   | 10.3    | Not Detect | 9.9     | Not Detect | Vmn1r40       | 0.473684211 | 0.49282297 | 0.23798077 | 0.2475962 |
| A_55_P2007 | 347.3   | Detected | 185     | Detected   | 311.8   | Detected   | 164.5   | Detected   | Nanog         | 0.473653902 | 0.8977829  | 0.88918919 | 1.6854054 |
| A_51_P2265 | 45.2    | Detected | 34.9    | Detected   | 41.8    | Detected   | 21.4    | Not Detect | Rpusd2        | 0.473451327 | 0.92477876 | 0.61318052 | 1.1977077 |
| A_51_P1127 | 841.8   | Detected | 417.3   | Detected   | 513     | Detected   | 398.4   | Detected   | Slc5a3        | 0.473271561 | 0.60940841 | 0.95470884 | 1.2293314 |
| A_51_P2322 | 22.4    | Detected | 26.4    | Detected   | 121.2   | Detected   | 10.6    | Not Detect | Pla2g2d       | 0.473214286 | 5.41071429 | 0.40151515 | 4.5909091 |
| A_65_P0372 | 13500.2 | Detected | 4412.9  | Detected   | 6039.8  | Detected   | 6386.2  | Detected   | St3gal1       | 0.473044844 | 0.44738596 | 1.44716626 | 1.3686691 |
| A_55_P2187 | 17081.1 | Detected | 4322.8  | Detected   | 4871    | Detected   | 8067.2  | Detected   | Gpr137b-ps    | 0.472288084 | 0.28516899 | 1.86619783 | 1.126816  |
| A_55_P2015 | 26.9    | Detected | 20.7    | Detected   | 20.1    | Detected   | 12.7    | Not Detect | Slc5a9        | 0.472118959 | 0.7472119  | 0.61352657 | 0.9710145 |
| A_55_P2074 | 1037.3  | Detected | 650.7   | Detected   | 553.3   | Detected   | 489.5   | Detected   | Ptpn14        | 0.471898197 | 0.53340403 | 0.75226679 | 0.850315  |
| A_55_P1956 | 19.5    | Detected | 10.9    | Not Detect | 9.5     | Not Detect | 9.2     | Not Detect | Defb46        | 0.471794872 | 0.48717949 | 0.8440367  | 0.8715596 |
| A_55_P2054 | 296.3   | Detected | 157     | Detected   | 163     | Detected   | 139.7   | Detected   | Ttpal         | 0.471481606 | 0.55011812 | 0.88980892 | 1.0382166 |
| A_51_P3513 | 17580.6 | Detected | 11674.2 | Detected   | 11916.3 | Detected   | 8287.6  | Detected   | Tyms-ps       | 0.471405982 | 0.67780963 | 0.70990732 | 1.020738  |
| A_51_P4522 | 250.8   | Detected | 102     | Detected   | 74.2    | Detected   | 118.2   | Detected   | Vash2         | 0.471291866 | 0.29585327 | 1.15882353 | 0.727451  |
| A_52_P8531 | 20.8    | Detected | 22.9    | Detected   | 3.5     | Not Detect | 9.8     | Not Detect | Angptl2       | 0.471153846 | 0.16826923 | 0.4279476  | 0.1528384 |
| A_55_P2006 | 1170.8  | Detected | 682.4   | Detected   | 272     | Detected   | 551.3   | Detected   | Ptprg         | 0.470874616 | 0.23231978 | 0.80788394 | 0.3985932 |
| A_55_P1998 | 20.6    | Detected | 22.7    | Detected   | 53.7    | Detected   | 9.7     | Not Detect | Birc7         | 0.470873786 | 2.60679612 | 0.42731278 | 2.3656388 |

|            |          |          |         |            |         |            |         |            |               |             |            |            |           |
|------------|----------|----------|---------|------------|---------|------------|---------|------------|---------------|-------------|------------|------------|-----------|
| A_55_P2030 | 2503.1   | Detected | 925.1   | Detected   | 1420.5  | Detected   | 1178.4  | Detected   | Dusp23        | 0.470776237 | 0.5674963  | 1.27380824 | 1.5355097 |
| A_55_P2115 | 37.6     | Detected | 30.8    | Detected   | 124.4   | Detected   | 17.7    | Not Detect | Gm5622        | 0.470744681 | 3.30851064 | 0.57467532 | 4.038961  |
| A_55_P1994 | 211.5    | Detected | 139.8   | Detected   | 104     | Detected   | 99.5    | Detected   | Zbp1          | 0.470449173 | 0.49172577 | 0.71173104 | 0.7439199 |
| A_51_P5207 | 1068.7   | Detected | 230.8   | Detected   | 58.2    | Detected   | 502.4   | Detected   | Ptger3        | 0.470103865 | 0.05445869 | 2.17677643 | 0.2521664 |
| A_51_P1154 | 20       | Detected | 10.9    | Not Detect | 4.4     | Not Detect | 9.4     | Not Detect | Speer6-ps1    | 0.47        | 0.22       | 0.86238532 | 0.4036697 |
| A_55_P2082 | 89.6     | Detected | 27      | Detected   | 33      | Detected   | 42.1    | Not Detect | Rtkn2         | 0.469866071 | 0.36830357 | 1.55925926 | 1.2222222 |
| A_52_P5158 | 91.1     | Detected | 69      | Detected   | 57.1    | Detected   | 42.8    | Not Detect | Rgmb          | 0.469813392 | 0.62678375 | 0.62028986 | 0.8275362 |
| A_55_P2224 | 19.8     | Detected | 6.1     | Not Detect | 8       | Not Detect | 9.3     | Not Detect | 6330412A17Rik | 0.46969697  | 0.4040404  | 1.52459016 | 1.3114754 |
| A_55_P1990 | 134843.1 | Detected | 25540.2 | Detected   | 37949.6 | Detected   | 63316.3 | Detected   | Aqp5          | 0.469555357 | 0.28143524 | 2.47908395 | 1.4858772 |
| A_55_P2058 | 21.3     | Detected | 19.7    | Detected   | 22.1    | Detected   | 10      | Not Detect | Cd46          | 0.469483568 | 1.03755869 | 0.50761421 | 1.1218274 |
| A_55_P2034 | 108.5    | Detected | 51.3    | Detected   | 41.2    | Detected   | 50.9    | Detected   | Zkscan7       | 0.469124424 | 0.3797235  | 0.99220273 | 0.8031189 |
| A_55_P2091 | 2694.6   | Detected | 1452.1  | Detected   | 1219.3  | Detected   | 1263.4  | Detected   | Hipk2         | 0.468863653 | 0.45249759 | 0.87005027 | 0.8396805 |
| A_55_P2045 | 25319.2  | Detected | 11983.7 | Detected   | 17307.8 | Detected   | 11864   | Detected   | Nsmf          | 0.468577206 | 0.683584   | 0.99001143 | 1.4442785 |
| A_55_P2009 | 169.3    | Detected | 129.7   | Detected   | 110     | Detected   | 79.3    | Detected   | S100bbp       | 0.468399291 | 0.6497342  | 0.61141095 | 0.848111  |
| A_55_P2368 | 22       | Detected | 41.2    | Detected   | 25.6    | Detected   | 10.3    | Not Detect | Gm10741       | 0.468181818 | 1.16363636 | 0.25       | 0.6213592 |
| A_55_P2091 | 32.7     | Detected | 20.7    | Detected   | 16.8    | Detected   | 15.3    | Not Detect | Dio3          | 0.467889908 | 0.51376147 | 0.73913043 | 0.8115942 |
| A_51_P4192 | 435      | Detected | 554     | Detected   | 138     | Detected   | 203.4   | Detected   | Batf3         | 0.467586207 | 0.31724138 | 0.36714801 | 0.2490975 |
| A_51_P4187 | 23.1     | Detected | 5.3     | Not Detect | 9.4     | Not Detect | 10.8    | Not Detect | Vmn1r38       | 0.467532468 | 0.40692641 | 2.03773585 | 1.7735849 |
| A_55_P2052 | 23.1     | Detected | 15.8    | Not Detect | 3.7     | Not Detect | 10.8    | Not Detect | Synm          | 0.467532468 | 0.16017316 | 0.6835443  | 0.2341772 |
| A_51_P3936 | 471.1    | Detected | 180.4   | Detected   | 40.4    | Detected   | 220.2   | Detected   | Fam171b       | 0.467416684 | 0.08575674 | 1.22062084 | 0.2239468 |
| A_55_P2124 | 168.2    | Detected | 245.3   | Detected   | 83.8    | Detected   | 78.6    | Detected   | Col16a1       | 0.467300832 | 0.49821641 | 0.32042397 | 0.3416225 |
| A_55_P1965 | 24.4     | Detected | 21.3    | Detected   | 11.5    | Not Detect | 11.4    | Not Detect | Fbx15         | 0.467213115 | 0.47131148 | 0.53521127 | 0.5399061 |
| A_55_P2018 | 9322.3   | Detected | 1262.6  | Detected   | 17434.7 | Detected   | 4352.1  | Detected   | Spns2         | 0.46684831  | 1.87021443 | 3.4469349  | 13.80857  |
| A_51_P4944 | 300.1    | Detected | 209.6   | Detected   | 172.4   | Detected   | 140.1   | Detected   | Snx30         | 0.466844385 | 0.57447517 | 0.66841603 | 0.8225191 |
| A_55_P1981 | 42.5     | Detected | 27.6    | Detected   | 31      | Detected   | 19.8    | Not Detect | LOC101055946  | 0.465882353 | 0.72941176 | 0.7173913  | 1.1231884 |
| A_55_P1982 | 956.5    | Detected | 271.3   | Detected   | 672.4   | Detected   | 445.6   | Detected   | C1ca1         | 0.465865133 | 0.70297961 | 1.64246222 | 2.4784372 |
| A_51_P4871 | 47.1     | Detected | 56.5    | Detected   | 25      | Detected   | 21.9    | Not Detect | Acsm3         | 0.464968153 | 0.53078556 | 0.38761062 | 0.4424779 |
| A_55_P2344 | 42.8     | Detected | 41.3    | Detected   | 38.7    | Detected   | 19.9    | Not Detect | C230076A16Rik | 0.464953271 | 0.90420561 | 0.48184019 | 0.937046  |
| A_55_P2004 | 171.9    | Detected | 421.2   | Detected   | 89      | Detected   | 79.9    | Detected   | Ldlrad4       | 0.464805119 | 0.51774287 | 0.18969611 | 0.211301  |
| A_55_P2152 | 2693.6   | Detected | 1200.8  | Detected   | 276.4   | Detected   | 1251.9  | Detected   | Lhfpl2        | 0.46476834  | 0.1026136  | 1.04255496 | 0.2301799 |
| A_55_P2380 | 57.9     | Detected | 57.7    | Detected   | 20.7    | Detected   | 26.9    | Not Detect | Gm2115        | 0.464594128 | 0.35751295 | 0.46620451 | 0.3587522 |
| A_52_P5043 | 3909     | Detected | 2681.3  | Detected   | 2416.9  | Detected   | 1816    | Detected   | Selrc1        | 0.464568943 | 0.61829112 | 0.67728341 | 0.9013911 |
| A_55_P1970 | 515.1    | Detected | 240.8   | Detected   | 120.2   | Detected   | 239.2   | Detected   | Sh3kbp1       | 0.464375849 | 0.23335275 | 0.99335548 | 0.4991694 |
| A_52_P4177 | 267.5    | Detected | 112     | Detected   | 177.1   | Detected   | 124.2   | Detected   | Tmem164       | 0.464299065 | 0.66205607 | 1.10892857 | 1.58125   |
| A_55_P2085 | 43040.5  | Detected | 61420.6 | Detected   | 15897.1 | Detected   | 19977.5 | Detected   | Spp1          | 0.464155853 | 0.36935212 | 0.32525732 | 0.2588236 |
| A_52_P6385 | 9683.6   | Detected | 2749.2  | Detected   | 4529.1  | Detected   | 4494.2  | Detected   | S100a7a       | 0.464104259 | 0.46770829 | 1.6347301  | 1.6474247 |
| A_66_P1194 | 1484.8   | Detected | 662.4   | Detected   | 796.9   | Detected   | 688.9   | Detected   | Rb1cc1        | 0.463968211 | 0.53670528 | 1.04000604 | 1.2030495 |
| A_55_P1960 | 462      | Detected | 250.7   | Detected   | 405.8   | Detected   | 214.2   | Detected   | Nrros         | 0.463636364 | 0.87835498 | 0.85440766 | 1.6186677 |
| A_55_P2144 | 25.9     | Detected | 16.8    | Detected   | 21.4    | Detected   | 12      | Not Detect | Gm128         | 0.463320463 | 0.82625483 | 0.71428571 | 1.2738095 |
| A_55_P2165 | 19       | Detected | 4.5     | Not Detect | 3.1     | Not Detect | 8.8     | Not Detect | Mettl11b      | 0.463157895 | 0.16315789 | 1.95555556 | 0.6888889 |

|            |                   |                   |                   |                   |               |             |            |            |           |
|------------|-------------------|-------------------|-------------------|-------------------|---------------|-------------|------------|------------|-----------|
| A_52_P3130 | 36.1 Detected     | 30.7 Detected     | 30.7 Detected     | 16.7 Not Detect   | 8030462N17Rik | 0.462603878 | 0.85041551 | 0.54397394 | 1         |
| A_52_P2075 | 114.6 Detected    | 85.2 Detected     | 80.9 Detected     | 53 Not Detect     | Peak1         | 0.462478185 | 0.70593368 | 0.62206573 | 0.9495305 |
| A_55_P1999 | 25.1 Detected     | 17.5 Not Detect   | 16.1 Not Detect   | 11.6 Not Detect   | LOC100040974  | 0.462151394 | 0.64143426 | 0.66285714 | 0.92      |
| A_66_P1320 | 433 Detected      | 322.8 Detected    | 241.6 Detected    | 200.1 Detected    | Iqcb1         | 0.462124711 | 0.55796767 | 0.61988848 | 0.7484511 |
| A_55_P2039 | 92.7 Detected     | 84 Detected       | 107 Detected      | 42.8 Not Detect   | Zfp605        | 0.461704423 | 1.15426106 | 0.50952381 | 1.2738095 |
| A_51_P4971 | 13659.9 Detected  | 5806.5 Detected   | 8840 Detected     | 6305.3 Detected   | Igf2bp1       | 0.461591959 | 0.64714969 | 1.08590373 | 1.5224318 |
| A_51_P1434 | 22.1 Detected     | 7.2 Not Detect    | 3.6 Not Detect    | 10.2 Not Detect   | Olf1010       | 0.461538462 | 0.16289593 | 1.41666667 | 0.5       |
| A_55_P2184 | 22.1 Detected     | 15.4 Not Detect   | 7.9 Not Detect    | 10.2 Not Detect   | Esco1         | 0.461538462 | 0.35746606 | 0.66233766 | 0.512987  |
| A_52_P6583 | 57 Detected       | 81.9 Detected     | 54.1 Detected     | 26.3 Not Detect   | Mfsd7a        | 0.461403509 | 0.94912281 | 0.32112332 | 0.6605617 |
| A_51_P3172 | 28.2 Detected     | 25.5 Detected     | 17 Not Detect     | 13 Not Detect     | Defb11        | 0.460992908 | 0.60283688 | 0.50980392 | 0.6666667 |
| A_55_P2107 | 32486.1 Detected  | 10392.1 Detected  | 10145.8 Detected  | 14970.6 Detected  | Gpr137b-ps    | 0.46083094  | 0.31231203 | 1.44057505 | 0.9762993 |
| A_55_P2009 | 87.3 Detected     | 135.9 Detected    | 10.9 Not Detect   | 40.2 Not Detect   | Ccbe1         | 0.4604811   | 0.12485682 | 0.29580574 | 0.080206  |
| A_51_P2936 | 9942.8 Detected   | 3121.4 Detected   | 4947.3 Detected   | 4576.9 Detected   | Rab32         | 0.460323048 | 0.49757614 | 1.46629717 | 1.5849619 |
| A_55_P2016 | 47792.8 Detected  | 29411.5 Detected  | 29915.9 Detected  | 21989.2 Detected  | Zyx           | 0.460094408 | 0.62594993 | 0.74763953 | 1.0171498 |
| A_55_P2086 | 2313.6 Detected   | 1618.1 Detected   | 860.4 Detected    | 1063.5 Detected   | Cyp39a1       | 0.459673237 | 0.37188797 | 0.65725233 | 0.5317348 |
| A_55_P2181 | 19.8 Detected     | 9.4 Not Detect    | 9.2 Not Detect    | 9.1 Not Detect    | Gm8369        | 0.45959596  | 0.46464646 | 0.96808511 | 0.9787234 |
| A_55_P2021 | 7413 Detected     | 3560.2 Detected   | 3059.7 Detected   | 3405.1 Detected   | Celf4         | 0.459341697 | 0.41274788 | 0.95643503 | 0.859418  |
| A_55_P1965 | 3586.3 Detected   | 2234.1 Detected   | 2604.2 Detected   | 1646.4 Detected   | Eme2          | 0.459080389 | 0.7261523  | 0.73694105 | 1.1656595 |
| A_55_P2138 | 19.4 Detected     | 18.7 Detected     | 15.6 Detected     | 8.9 Not Detect    | Lrnf1         | 0.458762887 | 0.80412371 | 0.47593583 | 0.8342246 |
| A_55_P1958 | 50.8 Detected     | 25.2 Detected     | 17.6 Not Detect   | 23.3 Not Detect   | Ms4a5         | 0.458661417 | 0.34645669 | 0.92460317 | 0.6984127 |
| A_55_P2024 | 280.2 Detected    | 87.8 Detected     | 179.2 Detected    | 128.5 Detected    | Tbkbp1        | 0.458600999 | 0.63954318 | 1.46355353 | 2.0410023 |
| A_55_P2079 | 600.1 Detected    | 278.1 Detected    | 131.6 Detected    | 275.2 Detected    | Zfp362        | 0.458590235 | 0.21929678 | 0.9895721  | 0.4732111 |
| A_51_P2937 | 15947.5 Detected  | 9915 Detected     | 12350.7 Detected  | 7311.9 Detected   | Cul7          | 0.458498197 | 0.77445995 | 0.7374584  | 1.2456581 |
| A_55_P2079 | 2247.8 Detected   | 1289.7 Detected   | 1296.5 Detected   | 1030.5 Detected   | Spred1        | 0.458448261 | 0.57678619 | 0.79902303 | 1.0052725 |
| A_55_P2037 | 42.1 Detected     | 6.4 Not Detect    | 8.4 Not Detect    | 19.3 Not Detect   | 2610305D13Rik | 0.458432304 | 0.19952494 | 3.015625   | 1.3125    |
| A_65_P0360 | 955.4 Detected    | 638.9 Detected    | 828.6 Detected    | 437.9 Detected    | Rpap2         | 0.458342056 | 0.86728072 | 0.68539678 | 1.2969166 |
| A_55_P2009 | 22.7 Detected     | 21.5 Detected     | 16.8 Not Detect   | 10.4 Not Detect   | Cd34          | 0.45814978  | 0.74008811 | 0.48372093 | 0.7813953 |
| A_52_P2069 | 872.9 Detected    | 515.7 Detected    | 686.6 Detected    | 399.9 Detected    | Parp16        | 0.458128079 | 0.78657349 | 0.77545084 | 1.3313942 |
| A_66_P1364 | 280.3 Detected    | 199.2 Detected    | 221.8 Detected    | 128.4 Detected    | Gm9456        | 0.458080628 | 0.79129504 | 0.64457831 | 1.1134538 |
| A_55_P2114 | 23.8 Detected     | 34.3 Detected     | 20.7 Detected     | 10.9 Not Detect   | Gm5105        | 0.457983193 | 0.8697479  | 0.31778426 | 0.6034985 |
| A_55_P2054 | 211.4 Detected    | 36.7 Detected     | 4.4 Not Detect    | 96.8 Detected     | Chst2         | 0.457899716 | 0.02081362 | 2.63760218 | 0.119891  |
| A_55_P2139 | 1456.8 Detected   | 1269 Detected     | 1054.8 Detected   | 666.5 Detected    | Cald1         | 0.45750961  | 0.72405272 | 0.52521671 | 0.8312057 |
| A_55_P1957 | 19.7 Detected     | 18 Detected       | 15.3 Not Detect   | 9 Not Detect      | Sohlh1        | 0.456852792 | 0.77664975 | 0.5        | 0.85      |
| A_55_P1977 | 76.4 Detected     | 46.5 Detected     | 67.6 Detected     | 34.9 Not Detect   | Dab2ip        | 0.456806283 | 0.88481675 | 0.75053763 | 1.4537634 |
| A_51_P4831 | 273311.1 Detected | 168693.6 Detected | 166557.1 Detected | 124801.6 Detected | Hmga1         | 0.456628362 | 0.60940481 | 0.7398123  | 0.987335  |
| A_55_P2181 | 18.4 Detected     | 9.9 Not Detect    | 3 Not Detect      | 8.4 Not Detect    | 6030419C18Rik | 0.456521739 | 0.16304348 | 0.84848485 | 0.3030303 |
| A_55_P2030 | 119 Detected      | 63.7 Detected     | 116.7 Detected    | 54.3 Detected     | Fnbp1         | 0.456302521 | 0.98067227 | 0.85243328 | 1.8320251 |
| A_55_P2139 | 11916.3 Detected  | 7694.5 Detected   | 10196.6 Detected  | 5437.1 Detected   | Jade2         | 0.456274179 | 0.85568507 | 0.70662161 | 1.3251803 |
| A_55_P2126 | 26.3 Detected     | 227.7 Detected    | 19.5 Detected     | 12 Not Detect     | Wnt10b        | 0.456273764 | 0.74144487 | 0.05270092 | 0.085639  |
| A_51_P5136 | 54.8 Detected     | 36.2 Detected     | 20.8 Detected     | 25 Not Detect     | Slc4a8        | 0.45620438  | 0.37956204 | 0.69060773 | 0.5745856 |



|            |                  |                  |                 |                 |               |             |            |            |           |
|------------|------------------|------------------|-----------------|-----------------|---------------|-------------|------------|------------|-----------|
| A_55_P2116 | 120.4 Detected   | 70.4 Detected    | 26 Detected     | 54.9 Detected   | Ptprg         | 0.455980066 | 0.21594684 | 0.77982955 | 0.3693182 |
| A_55_P2028 | 19.3 Detected    | 15.8 Detected    | 13.9 Not Detect | 8.8 Not Detect  | Gm10933       | 0.455958549 | 0.72020725 | 0.55696203 | 0.8797468 |
| A_55_P1955 | 149.6 Detected   | 177.4 Detected   | 95.2 Detected   | 68.2 Detected   | Adamts4       | 0.455882353 | 0.63636364 | 0.38444194 | 0.5366404 |
| A_55_P2156 | 39.5 Detected    | 25.9 Detected    | 23.4 Detected   | 18 Not Detect   | Ifnk          | 0.455696203 | 0.59240506 | 0.69498069 | 0.9034749 |
| A_55_P1990 | 217.1 Detected   | 128.8 Detected   | 117.2 Detected  | 98.9 Detected   | Car5b         | 0.455550438 | 0.53984339 | 0.76785714 | 0.9099379 |
| A_51_P3407 | 19.1 Detected    | 18.5 Detected    | 13.5 Not Detect | 8.7 Not Detect  | Hspa1l        | 0.455497382 | 0.70680628 | 0.47027027 | 0.7297297 |
| A_51_P1809 | 18747 Detected   | 10027 Detected   | 5477.9 Detected | 8535.7 Detected | Prkcdbp       | 0.455310183 | 0.29220142 | 0.85127157 | 0.5463149 |
| A_55_P1991 | 202.1 Detected   | 230.5 Detected   | 30.8 Detected   | 92 Detected     | AK129341      | 0.455220188 | 0.1523998  | 0.39913232 | 0.1336226 |
| A_55_P2036 | 97.6 Detected    | 82.2 Detected    | 96.1 Detected   | 44.4 Not Detect | Stk36         | 0.454918033 | 0.98463115 | 0.54014599 | 1.1690998 |
| A_55_P1998 | 10710.4 Detected | 5528.9 Detected  | 6738.9 Detected | 4855.1 Detected | Txnrd2        | 0.453307066 | 0.62919219 | 0.87813127 | 1.21885   |
| A_55_P2038 | 5258.6 Detected  | 4719.2 Detected  | 2996.8 Detected | 2383.5 Detected | Fblim1        | 0.453257521 | 0.56988552 | 0.50506442 | 0.6350229 |
| A_55_P2090 | 9510.2 Detected  | 5957.3 Detected  | 5606.5 Detected | 4310.1 Detected | Tpst2         | 0.453208134 | 0.58952493 | 0.7234989  | 0.9411143 |
| A_55_P2318 | 38.4 Detected    | 28.2 Detected    | 22.7 Detected   | 17.4 Not Detect | 1200007C13Rik | 0.453125    | 0.59114583 | 0.61702128 | 0.8049645 |
| A_55_P2006 | 21.2 Detected    | 5 Not Detect     | 10.8 Not Detect | 9.6 Not Detect  | Gbgt1         | 0.452830189 | 0.50943396 | 1.92       | 2.16      |
| A_52_P4624 | 21.2 Detected    | 1091.8 Detected  | 3.5 Not Detect  | 9.6 Not Detect  | C77370        | 0.452830189 | 0.16509434 | 0.00879282 | 0.0032057 |
| A_55_P2074 | 11011.4 Detected | 6487.6 Detected  | 5048.9 Detected | 4982.2 Detected | Mapk8ip1      | 0.452458361 | 0.45851572 | 0.76795733 | 0.7782385 |
| A_51_P2282 | 9215 Detected    | 6953.8 Detected  | 6673.4 Detected | 4167.4 Detected | Mpzl1         | 0.452240912 | 0.72418882 | 0.59929823 | 0.9596767 |
| A_55_P1960 | 326.7 Detected   | 134.5 Detected   | 444.3 Detected  | 147.7 Detected  | Spns3         | 0.452096725 | 1.35996327 | 1.09814126 | 3.3033457 |
| A_55_P2140 | 28.1 Detected    | 27.7 Detected    | 22.9 Detected   | 12.7 Not Detect | Dupd1         | 0.451957295 | 0.81494662 | 0.45848375 | 0.8267148 |
| A_55_P2011 | 27 Detected      | 30.6 Detected    | 21.9 Detected   | 12.2 Not Detect | Ldoc1l        | 0.451851852 | 0.81111111 | 0.39869281 | 0.7156863 |
| A_55_P2386 | 50.5 Detected    | 70 Detected      | 35.9 Detected   | 22.8 Not Detect | 2810004I08Rik | 0.451485149 | 0.71089109 | 0.32571429 | 0.5128571 |
| A_55_P2011 | 21.5 Detected    | 16.5 Not Detect  | 26.4 Detected   | 9.7 Not Detect  | Ecm2          | 0.451162791 | 1.22790698 | 0.58787879 | 1.6       |
| A_51_P1993 | 56.3 Detected    | 25.5 Detected    | 23.1 Detected   | 25.4 Not Detect | 2310015B20Rik | 0.451154529 | 0.41030195 | 0.99607843 | 0.9058824 |
| A_55_P2088 | 36.6 Detected    | 24.2 Detected    | 12.5 Not Detect | 16.5 Not Detect | C230072F16Rik | 0.450819672 | 0.34153005 | 0.68181818 | 0.5165289 |
| A_51_P3028 | 52.8 Detected    | 3.7 Not Detect   | 461.5 Detected  | 23.8 Not Detect | Ugt2b37       | 0.450757576 | 8.7405303  | 6.43243243 | 124.72973 |
| A_55_P2042 | 23.3 Detected    | 17.9 Not Detect  | 11 Not Detect   | 10.5 Not Detect | Prune2        | 0.450643777 | 0.472103   | 0.58659218 | 0.6145251 |
| A_55_P2159 | 9840.1 Detected  | 10100.7 Detected | 2700.3 Detected | 4434 Detected   | Fndc4         | 0.450605177 | 0.27441794 | 0.43897948 | 0.2673379 |
| A_55_P2134 | 876.6 Detected   | 804 Detected     | 469 Detected    | 394.3 Detected  | Brsk1         | 0.449806069 | 0.53502167 | 0.49042289 | 0.5833333 |
| A_55_P1978 | 114.5 Detected   | 68.3 Detected    | 123.7 Detected  | 51.5 Detected   | Slx4ip        | 0.449781659 | 1.08034934 | 0.75402635 | 1.8111274 |
| A_55_P2027 | 182.1 Detected   | 151.3 Detected   | 115.1 Detected  | 81.9 Detected   | 5830416P10Rik | 0.449752883 | 0.63207029 | 0.54130866 | 0.7607403 |
| A_55_P2149 | 121.7 Detected   | 73.1 Detected    | 90 Detected     | 54.7 Detected   | Cnbd2         | 0.4494659   | 0.73952342 | 0.74829001 | 1.2311902 |
| A_55_P2096 | 22.7 Detected    | 18.7 Detected    | 20.2 Detected   | 10.2 Not Detect | Glyctk        | 0.449339207 | 0.88986784 | 0.54545455 | 1.0802139 |
| A_55_P2128 | 24.1 Detected    | 8.8 Not Detect   | 8.9 Not Detect  | 10.8 Not Detect | Il19          | 0.44813278  | 0.36929461 | 1.22727273 | 1.0113636 |
| A_52_P6109 | 27.9 Detected    | 12 Not Detect    | 9.7 Not Detect  | 12.5 Not Detect | Slc28a3       | 0.448028674 | 0.34767025 | 1.04166667 | 0.8083333 |
| A_55_P2129 | 11803.2 Detected | 6412.7 Detected  | 7250.3 Detected | 5287.4 Detected | Itprlp        | 0.447963264 | 0.61426562 | 0.82452009 | 1.1306158 |
| A_52_P1252 | 71 Detected      | 29.9 Detected    | 29 Detected     | 31.8 Not Detect | Olfrl23       | 0.447887324 | 0.4084507  | 1.06354515 | 0.9698997 |
| A_55_P1959 | 4518.3 Detected  | 3860.8 Detected  | 2952.2 Detected | 2022.6 Detected | Etv4          | 0.447646239 | 0.65338734 | 0.52388106 | 0.7646602 |
| A_51_P3506 | 21 Detected      | 176.4 Detected   | 5.3 Not Detect  | 9.4 Not Detect  | Peli2         | 0.447619048 | 0.25238095 | 0.05328798 | 0.0300454 |
| A_55_P2025 | 22.8 Detected    | 3.7 Not Detect   | 8.7 Not Detect  | 10.2 Not Detect | Tnfrsf18      | 0.447368421 | 0.38157895 | 2.75675676 | 2.3513514 |
| A_55_P2044 | 91.7 Detected    | 51.4 Detected    | 75.8 Detected   | 41 Not Detect   | Zfp74         | 0.447110142 | 0.82660851 | 0.79766537 | 1.4747082 |

|            |        |          |        |            |        |            |        |            |               |             |            |            |           |
|------------|--------|----------|--------|------------|--------|------------|--------|------------|---------------|-------------|------------|------------|-----------|
| A_55_P1966 | 131.8  | Detected | 72.7   | Detected   | 71     | Detected   | 58.9   | Detected   | Mybl1         | 0.446889226 | 0.53869499 | 0.81017882 | 0.9766162 |
| A_55_P2114 | 2989.8 | Detected | 14446  | Detected   | 80.4   | Detected   | 1336.1 | Detected   | Greb1         | 0.446886079 | 0.02689143 | 0.09248927 | 0.0055656 |
| A_55_P1969 | 1034.3 | Detected | 302.5  | Detected   | 353.8  | Detected   | 462.2  | Detected   | Sh3kbp1       | 0.446872281 | 0.3420671  | 1.52793388 | 1.1695868 |
| A_55_P2152 | 8152.1 | Detected | 4360.4 | Detected   | 2834   | Detected   | 3640   | Detected   | Fgfr1         | 0.446510715 | 0.34764049 | 0.8347858  | 0.6499404 |
| A_66_P1261 | 159.7  | Detected | 74.4   | Detected   | 148.5  | Detected   | 71.3   | Detected   | Kcnd1         | 0.446462116 | 0.9298685  | 0.95833333 | 1.9959677 |
| A_55_P2042 | 29.8   | Detected | 27.9   | Detected   | 26.3   | Detected   | 13.3   | Not Detect | Vgll2         | 0.446308725 | 0.88255034 | 0.47670251 | 0.9426523 |
| A_51_P2679 | 24.2   | Detected | 15.7   | Not Detect | 18.9   | Detected   | 10.8   | Not Detect | Reg3a         | 0.446280992 | 0.78099174 | 0.68789809 | 1.2038217 |
| A_51_P3678 | 732.3  | Detected | 1125.8 | Detected   | 397.1  | Detected   | 326.4  | Detected   | Egr1          | 0.445718968 | 0.5422641  | 0.28992716 | 0.3527269 |
| A_52_P6129 | 19.3   | Detected | 15.4   | Detected   | 9.6    | Not Detect | 8.6    | Not Detect | Gabbr2        | 0.445595855 | 0.49740933 | 0.55844156 | 0.6233766 |
| A_52_P2969 | 373.8  | Detected | 191.1  | Detected   | 288.4  | Detected   | 166.5  | Detected   | Slc9a8        | 0.445425361 | 0.77153558 | 0.87127159 | 1.5091575 |
| A_55_P2121 | 50.3   | Detected | 11     | Not Detect | 9.1    | Not Detect | 22.4   | Not Detect | Znf41-ps      | 0.445328032 | 0.18091451 | 2.03636364 | 0.8272727 |
| A_51_P4444 | 211.8  | Detected | 138.3  | Detected   | 120.9  | Detected   | 94.3   | Detected   | Fam188b       | 0.44523135  | 0.57082153 | 0.68185105 | 0.8741866 |
| A_55_P2134 | 5475.6 | Detected | 2893.4 | Detected   | 3503   | Detected   | 2436.6 | Detected   | Serpina9      | 0.44499233  | 0.63974724 | 0.84212345 | 1.2106864 |
| A_55_P1955 | 23.6   | Detected | 31.9   | Detected   | 11.1   | Not Detect | 10.5   | Not Detect | Fam69c        | 0.444915254 | 0.47033898 | 0.32915361 | 0.3479624 |
| A_55_P1992 | 25.4   | Detected | 29.7   | Detected   | 55.6   | Detected   | 11.3   | Not Detect | Msi2          | 0.44488189  | 2.18897638 | 0.38047138 | 1.8720539 |
| A_55_P2127 | 20.7   | Detected | 21.8   | Detected   | 15     | Not Detect | 9.2    | Not Detect | Fbxo17        | 0.444444444 | 0.72463768 | 0.42201835 | 0.6880734 |
| A_55_P2038 | 7688   | Detected | 286.3  | Detected   | 1300.8 | Detected   | 3414.8 | Detected   | Acot1         | 0.444172737 | 0.16919875 | 11.9273489 | 4.5434859 |
| A_51_P2062 | 18.7   | Detected | 286.6  | Detected   | 11.2   | Not Detect | 8.3    | Not Detect | Uroc1         | 0.443850267 | 0.59893048 | 0.02896022 | 0.0390789 |
| A_55_P2109 | 9493   | Detected | 6521   | Detected   | 4787.2 | Detected   | 4212   | Detected   | Lrig1         | 0.443695354 | 0.50428737 | 0.6459132  | 0.7341205 |
| A_55_P2137 | 3637.4 | Detected | 2333.3 | Detected   | 3302.3 | Detected   | 1612.3 | Detected   | Tgfb1         | 0.443256172 | 0.90787376 | 0.69099559 | 1.4152916 |
| A_55_P1985 | 23.7   | Detected | 4.1    | Not Detect | 3.7    | Not Detect | 10.5   | Not Detect | Kcnk10        | 0.443037975 | 0.15611814 | 2.56097561 | 0.902439  |
| A_55_P2184 | 1273.3 | Detected | 916.5  | Detected   | 612.2  | Detected   | 564.1  | Detected   | Itgal         | 0.443022069 | 0.48079793 | 0.61549373 | 0.667976  |
| A_51_P1370 | 1211.8 | Detected | 1031.6 | Detected   | 1146.5 | Detected   | 536.8  | Detected   | Sall2         | 0.442977389 | 0.94611322 | 0.52035673 | 1.1113804 |
| A_55_P2157 | 656.7  | Detected | 382.2  | Detected   | 540.8  | Detected   | 290.9  | Detected   | Stk35         | 0.442972438 | 0.8235115  | 0.76111983 | 1.414966  |
| A_55_P2088 | 21     | Detected | 3.2    | Not Detect | 14.6   | Not Detect | 9.3    | Not Detect | Tnnt3         | 0.442857143 | 0.6952381  | 2.90625    | 4.5625    |
| A_55_P2107 | 20.8   | Detected | 18.2   | Detected   | 3.4    | Not Detect | 9.2    | Not Detect | Fam115a       | 0.442307692 | 0.16346154 | 0.50549451 | 0.1868132 |
| A_55_P2280 | 422.4  | Detected | 297.4  | Detected   | 128    | Detected   | 186.8  | Detected   | Zfp697        | 0.442234848 | 0.3030303  | 0.62811029 | 0.4303968 |
| A_51_P1181 | 23.3   | Detected | 14.2   | Not Detect | 13.3   | Not Detect | 10.3   | Not Detect | Lmo3          | 0.442060086 | 0.57081545 | 0.72535211 | 0.9366197 |
| A_55_P1975 | 368.8  | Detected | 75     | Detected   | 13.4   | Not Detect | 163    | Detected   | Ptger3        | 0.44197397  | 0.03633406 | 2.17333333 | 0.1786667 |
| A_55_P1962 | 22.4   | Detected | 34.3   | Detected   | 36     | Detected   | 9.9    | Not Detect | Maf           | 0.441964286 | 1.60714286 | 0.28862974 | 1.0495627 |
| A_51_P1986 | 627.7  | Detected | 575.4  | Detected   | 82.3   | Detected   | 277.3  | Detected   | Parvb         | 0.441771547 | 0.13111359 | 0.48192562 | 0.1430309 |
| A_66_P1252 | 23.1   | Detected | 3.6    | Not Detect | 69.4   | Detected   | 10.2   | Not Detect | Gm14492       | 0.441558442 | 3.004329   | 2.83333333 | 19.277778 |
| A_52_P6154 | 23.1   | Detected | 16.6   | Not Detect | 16.4   | Not Detect | 10.2   | Not Detect | Cntnap5a      | 0.441558442 | 0.70995671 | 0.61445783 | 0.9879518 |
| A_51_P4964 | 5200.2 | Detected | 3110.3 | Detected   | 2906.2 | Detected   | 2295.8 | Detected   | Acs1          | 0.44148302  | 0.55886312 | 0.73812815 | 0.9343793 |
| A_55_P1974 | 329.7  | Detected | 383.7  | Detected   | 81.6   | Detected   | 145.5  | Detected   | Cdk14         | 0.441310282 | 0.24749773 | 0.3792025  | 0.2126661 |
| A_52_P2539 | 7347.1 | Detected | 3657.6 | Detected   | 6640.8 | Detected   | 3241.1 | Detected   | Cds2          | 0.441140042 | 0.90386683 | 0.88612752 | 1.8156168 |
| A_51_P3632 | 591.2  | Detected | 558.3  | Detected   | 236.2  | Detected   | 260.6  | Detected   | D630045J12Rik | 0.440798376 | 0.39952639 | 0.46677414 | 0.42307   |
| A_55_P2098 | 3303.1 | Detected | 970.2  | Detected   | 4535.2 | Detected   | 1455.5 | Detected   | Shf           | 0.440646665 | 1.37301323 | 1.50020614 | 4.6745001 |
| A_55_P1972 | 473.3  | Detected | 153.1  | Detected   | 441.5  | Detected   | 208.5  | Detected   | Masp1         | 0.440523981 | 0.93281217 | 1.361855   | 2.8837361 |
| A_55_P2178 | 83.7   | Detected | 19.2   | Detected   | 61.1   | Detected   | 36.8   | Not Detect | Nacc2         | 0.439665472 | 0.72998805 | 1.91666667 | 3.1822917 |

|            |          |          |         |            |         |            |         |            |               |             |            |            |           |
|------------|----------|----------|---------|------------|---------|------------|---------|------------|---------------|-------------|------------|------------|-----------|
| A_55_P2120 | 204.6    | Detected | 264.8   | Detected   | 94.7    | Detected   | 89.9    | Detected   | Gm10537       | 0.439393939 | 0.46285435 | 0.33950151 | 0.3576284 |
| A_55_P1952 | 177.3    | Detected | 204.3   | Detected   | 122.1   | Detected   | 77.8    | Detected   | Spry2         | 0.438804287 | 0.68866328 | 0.38081253 | 0.5976505 |
| A_66_P1321 | 25.3     | Detected | 18.4    | Detected   | 28      | Detected   | 11.1    | Not Detect | Gm9959        | 0.438735178 | 1.10671937 | 0.60326087 | 1.5217391 |
| A_55_P2012 | 5792.5   | Detected | 3840.7  | Detected   | 3604    | Detected   | 2540    | Detected   | Sec61a2       | 0.438498058 | 0.62218386 | 0.66133778 | 0.9383706 |
| A_55_P2118 | 20.3     | Detected | 4.1     | Not Detect | 78.7    | Detected   | 8.9     | Not Detect | Mx1           | 0.438423645 | 3.87684729 | 2.17073171 | 19.195122 |
| A_55_P2426 | 20.3     | Detected | 14.1    | Not Detect | 10.8    | Not Detect | 8.9     | Not Detect | A830080H07Rik | 0.438423645 | 0.5320197  | 0.63120567 | 0.7659574 |
| A_55_P2121 | 7265.1   | Detected | 4063.7  | Detected   | 4211.2  | Detected   | 3183    | Detected   | Sox4          | 0.43812198  | 0.57964791 | 0.78327632 | 1.036297  |
| A_55_P2126 | 21       | Detected | 12.2    | Not Detect | 16.2    | Not Detect | 9.2     | Not Detect | Safb2         | 0.438095238 | 0.77142857 | 0.75409836 | 1.3278689 |
| A_55_P2105 | 4544.3   | Detected | 4143.8  | Detected   | 2676.5  | Detected   | 1989.9  | Detected   | Arhgap39      | 0.437889224 | 0.5889796  | 0.4802114  | 0.6459047 |
| A_51_P2141 | 23.3     | Detected | 3.8     | Not Detect | 3.7     | Not Detect | 10.2    | Not Detect | Slc6a3        | 0.43776824  | 0.15879828 | 2.68421053 | 0.9736842 |
| A_55_P2107 | 353.5    | Detected | 401.2   | Detected   | 112.6   | Detected   | 154.7   | Detected   | Apol9a        | 0.437623762 | 0.318529   | 0.38559322 | 0.280658  |
| A_51_P2462 | 1206.3   | Detected | 806.2   | Detected   | 848.3   | Detected   | 527.7   | Detected   | Tram2         | 0.43745337  | 0.70322474 | 0.65455222 | 1.0522203 |
| A_51_P4515 | 4507.3   | Detected | 2740.1  | Detected   | 2060.2  | Detected   | 1970.5  | Detected   | Arhgef25      | 0.437179686 | 0.45708074 | 0.71913434 | 0.7518704 |
| A_52_P6753 | 10443    | Detected | 10540   | Detected   | 8948.5  | Detected   | 4565.3  | Detected   | Ackr3         | 0.43716365  | 0.85688978 | 0.43314042 | 0.8490038 |
| A_55_P1987 | 493.4    | Detected | 483.6   | Detected   | 241.9   | Detected   | 215.4   | Detected   | Pr13d1        | 0.436562627 | 0.49027158 | 0.44540943 | 0.5002068 |
| A_55_P1985 | 19.7     | Detected | 39      | Detected   | 18.3    | Detected   | 8.6     | Not Detect | Dock6         | 0.436548223 | 0.92893401 | 0.22051282 | 0.4692308 |
| A_51_P1050 | 283.3    | Detected | 64.3    | Detected   | 117.7   | Detected   | 123.6   | Detected   | Lypd6b        | 0.436286622 | 0.41546064 | 1.9222395  | 1.8304821 |
| A_52_P3098 | 170.1    | Detected | 89      | Detected   | 71.4    | Detected   | 74.2    | Detected   | Mcc           | 0.436213992 | 0.41975309 | 0.83370787 | 0.8022472 |
| A_55_P2055 | 28.2     | Detected | 22      | Detected   | 108     | Detected   | 12.3    | Not Detect | Ocln          | 0.436170213 | 3.82978723 | 0.55909091 | 4.9090909 |
| A_51_P1893 | 22842.1  | Detected | 5902.2  | Detected   | 30343.2 | Detected   | 9962.5  | Detected   | Osgin1        | 0.436146414 | 1.32838925 | 1.68792992 | 5.1409983 |
| A_55_P2084 | 21.1     | Detected | 3.2     | Not Detect | 4       | Not Detect | 9.2     | Not Detect | 1700021P04Rik | 0.436018957 | 0.18957346 | 2.875      | 1.25      |
| A_52_P6606 | 2167.3   | Detected | 1254.2  | Detected   | 3.6     | Not Detect | 944.9   | Detected   | Dsel          | 0.435980252 | 0.00166105 | 0.75338861 | 0.0028704 |
| A_55_P1966 | 23.4     | Detected | 6       | Not Detect | 9.2     | Not Detect | 10.2    | Not Detect | Smarca5-ps    | 0.435897436 | 0.39316239 | 1.7        | 1.5333333 |
| A_52_P5861 | 23.4     | Detected | 175.4   | Detected   | 19.6    | Detected   | 10.2    | Not Detect | Adcy7         | 0.435897436 | 0.83760684 | 0.05815279 | 0.1117446 |
| A_51_P1406 | 19.5     | Detected | 285.8   | Detected   | 13.3    | Not Detect | 8.5     | Not Detect | Eva1a         | 0.435897436 | 0.68205128 | 0.02974108 | 0.046536  |
| A_55_P1955 | 33.3     | Detected | 23.3    | Detected   | 17.2    | Not Detect | 14.5    | Not Detect | C130079G13Rik | 0.435435435 | 0.51651652 | 0.6223176  | 0.7381974 |
| A_52_P2971 | 19.3     | Detected | 9.7     | Not Detect | 49      | Detected   | 8.4     | Not Detect | E230001N04Rik | 0.435233161 | 2.5388601  | 0.86597938 | 5.0515464 |
| A_55_P1979 | 26.2     | Detected | 34.9    | Detected   | 27.3    | Detected   | 11.4    | Not Detect | Lrit3         | 0.435114504 | 1.04198473 | 0.32664756 | 0.782235  |
| A_55_P1974 | 102564.2 | Detected | 50959.4 | Detected   | 66592.4 | Detected   | 44622.3 | Detected   | Bcl2l1        | 0.435067012 | 0.64927528 | 0.87564414 | 1.3067736 |
| A_55_P2154 | 80.7     | Detected | 73.7    | Detected   | 45.3    | Detected   | 35.1    | Not Detect | Slco1a5       | 0.434944238 | 0.56133829 | 0.47625509 | 0.614654  |
| A_51_P4256 | 6255.5   | Detected | 3838.6  | Detected   | 5241.2  | Detected   | 2719.9  | Detected   | Ivd           | 0.434801375 | 0.83785469 | 0.70856562 | 1.3653936 |
| A_55_P2038 | 21.4     | Detected | 7       | Not Detect | 3.3     | Not Detect | 9.3     | Not Detect | Niacr1        | 0.434579439 | 0.15420561 | 1.32857143 | 0.4714286 |
| A_55_P1969 | 24.4     | Detected | 3.8     | Not Detect | 3.8     | Not Detect | 10.6    | Not Detect | Slc17a1       | 0.43442623  | 0.1557377  | 2.78947368 | 1         |
| A_55_P2330 | 19.8     | Detected | 28.5    | Detected   | 16.8    | Detected   | 8.6     | Not Detect | 1700120E14Rik | 0.434343434 | 0.84848485 | 0.30175439 | 0.5894737 |
| A_55_P2128 | 2552.5   | Detected | 1531.1  | Detected   | 1183.4  | Detected   | 1108.2  | Detected   | Nr2f2         | 0.434162586 | 0.4636239  | 0.72379335 | 0.7729084 |
| A_55_P2073 | 26.5     | Detected | 18.3    | Detected   | 20.7    | Detected   | 11.5    | Not Detect | LOC101056044  | 0.433962264 | 0.78113208 | 0.6284153  | 1.1311475 |
| A_55_P2095 | 72.6     | Detected | 46      | Detected   | 42.1    | Detected   | 31.5    | Not Detect | Kalrn         | 0.433884298 | 0.57988981 | 0.68478261 | 0.9152174 |
| A_55_P2364 | 19.6     | Detected | 10.2    | Not Detect | 3.1     | Not Detect | 8.5     | Not Detect | Plxdc1        | 0.433673469 | 0.15816327 | 0.83333333 | 0.3039216 |
| A_51_P1264 | 10516.1  | Detected | 8944.5  | Detected   | 4243.5  | Detected   | 4559.6  | Detected   | Enc1          | 0.433582792 | 0.40352412 | 0.50976578 | 0.4744256 |
| A_52_P6076 | 23.3     | Detected | 101.4   | Detected   | 7       | Not Detect | 10.1    | Not Detect | Ppm1e         | 0.433476395 | 0.30042918 | 0.09960552 | 0.0690335 |

|            |                  |                  |                  |                  |               |             |            |            |           |
|------------|------------------|------------------|------------------|------------------|---------------|-------------|------------|------------|-----------|
| A_55_P2165 | 49.6 Detected    | 37.9 Detected    | 15.8 Detected    | 21.5 Not Detect  | Gm10779       | 0.433467742 | 0.31854839 | 0.56728232 | 0.4168865 |
| A_55_P1983 | 25.4 Detected    | 26 Detected      | 14.8 Not Detect  | 11 Not Detect    | Hhla1         | 0.433070866 | 0.58267717 | 0.42307692 | 0.5692308 |
| A_55_P1971 | 19.4 Detected    | 12.9 Not Detect  | 11.6 Not Detect  | 8.4 Not Detect   | Reck          | 0.432989691 | 0.59793814 | 0.65116279 | 0.8992248 |
| A_55_P2000 | 5153.1 Detected  | 2688.9 Detected  | 1079.6 Detected  | 2230.3 Detected  | Gkap1         | 0.432807436 | 0.20950496 | 0.82944699 | 0.4015025 |
| A_55_P2335 | 26.6 Detected    | 19.7 Detected    | 23 Detected      | 11.5 Not Detect  | D11ErtD712e   | 0.432330827 | 0.86466165 | 0.58375635 | 1.1675127 |
| A_52_P1135 | 19.9 Detected    | 12.7 Not Detect  | 63.7 Detected    | 8.6 Not Detect   | Gm684         | 0.432160804 | 3.20100503 | 0.67716535 | 5.015748  |
| A_55_P2154 | 6910.4 Detected  | 4212.3 Detected  | 3116 Detected    | 2985.8 Detected  | Peak1         | 0.432073397 | 0.45091456 | 0.70882891 | 0.7397384 |
| A_51_P4261 | 123.9 Detected   | 144.6 Detected   | 56.6 Detected    | 53.5 Detected    | Nppb          | 0.431799839 | 0.45682002 | 0.36998617 | 0.3914246 |
| A_51_P2731 | 32.2 Detected    | 143.5 Detected   | 7.7 Not Detect   | 13.9 Not Detect  | Pde6h         | 0.431677019 | 0.23913043 | 0.09686411 | 0.0536585 |
| A_55_P2419 | 819.7 Detected   | 377.7 Detected   | 790.4 Detected   | 353.7 Detected   | Ccny          | 0.431499329 | 0.96425522 | 0.93645751 | 2.0926661 |
| A_55_P2165 | 496.1 Detected   | 289.5 Detected   | 286.3 Detected   | 214 Detected     | Atrn          | 0.431364644 | 0.57710139 | 0.73920553 | 0.9889465 |
| A_55_P1956 | 596.5 Detected   | 356.2 Detected   | 375.6 Detected   | 257.2 Detected   | Sgms1         | 0.431181894 | 0.62967309 | 0.72206625 | 1.0544638 |
| A_55_P1967 | 375.3 Detected   | 664.9 Detected   | 710.4 Detected   | 161.6 Detected   | Nfatc2        | 0.430588862 | 1.89288569 | 0.24304407 | 1.0684313 |
| A_51_P2323 | 197.3 Detected   | 1117.8 Detected  | 85.2 Detected    | 84.8 Detected    | Stab1         | 0.429802331 | 0.4318297  | 0.0758633  | 0.0762211 |
| A_52_P4660 | 9167.2 Detected  | 5823.3 Detected  | 4895.9 Detected  | 3938.5 Detected  | Samhd1        | 0.429629549 | 0.53406711 | 0.67633472 | 0.8407432 |
| A_51_P4928 | 20.5 Detected    | 21.6 Detected    | 8.6 Not Detect   | 8.8 Not Detect   | 4933430117Rik | 0.429268293 | 0.4195122  | 0.40740741 | 0.3981481 |
| A_55_P2030 | 334.9 Detected   | 178.6 Detected   | 209.8 Detected   | 143.7 Detected   | Rbm39         | 0.429083308 | 0.62645566 | 0.80459127 | 1.174692  |
| A_52_P1058 | 553.5 Detected   | 287.2 Detected   | 271.6 Detected   | 237.2 Detected   | Fnbp1         | 0.428545619 | 0.49069557 | 0.82590529 | 0.9456825 |
| A_51_P2501 | 458.4 Detected   | 295.4 Detected   | 242.9 Detected   | 196.3 Detected   | Zfp763        | 0.428228621 | 0.52988656 | 0.66452268 | 0.8222749 |
| A_55_P2131 | 568 Detected     | 351.8 Detected   | 295.2 Detected   | 242.9 Detected   | Lpcat1        | 0.427640845 | 0.51971831 | 0.69044912 | 0.8391131 |
| A_55_P1999 | 24.1 Detected    | 23 Detected      | 17.5 Detected    | 10.3 Not Detect  | Gm7789        | 0.427385892 | 0.72614108 | 0.44782609 | 0.7608696 |
| A_55_P1984 | 27333.4 Detected | 16838.6 Detected | 14533.7 Detected | 11679.6 Detected | Slc44a2       | 0.427301397 | 0.53171943 | 0.69362061 | 0.8631181 |
| A_55_P2164 | 126.9 Detected   | 92.3 Detected    | 52.8 Detected    | 54.2 Detected    | Samhd1        | 0.427107959 | 0.41607565 | 0.5872156  | 0.5720477 |
| A_52_P3078 | 44.5 Detected    | 37.3 Detected    | 15.6 Not Detect  | 19 Not Detect    | Zbtb38        | 0.426966292 | 0.3505618  | 0.50938338 | 0.4182306 |
| A_55_P2213 | 25.3 Detected    | 30 Detected      | 13.6 Not Detect  | 10.8 Not Detect  | 4933417E11Rik | 0.42687747  | 0.53754941 | 0.36       | 0.4533333 |
| A_55_P2121 | 19328 Detected   | 10153 Detected   | 11314.6 Detected | 8246.8 Detected  | Sox4          | 0.426676325 | 0.58539942 | 0.81225254 | 1.1144095 |
| A_55_P1955 | 21.8 Detected    | 17.5 Detected    | 11.1 Not Detect  | 9.3 Not Detect   | Stat1         | 0.426605505 | 0.50917431 | 0.53142857 | 0.6342857 |
| A_52_P5442 | 23.7 Detected    | 76.3 Detected    | 3.6 Not Detect   | 10.1 Not Detect  | A630095E13Rik | 0.426160338 | 0.15189873 | 0.13237221 | 0.0471822 |
| A_55_P1989 | 207 Detected     | 84 Detected      | 124.2 Detected   | 88.2 Detected    | Tmem164       | 0.426086957 | 0.6        | 1.05       | 1.4785714 |
| A_55_P1987 | 96.4 Detected    | 69.1 Detected    | 76.5 Detected    | 41 Not Detect    | Rps6ka5       | 0.425311203 | 0.79356846 | 0.59334298 | 1.1070912 |
| A_55_P1953 | 24.7 Detected    | 8.6 Not Detect   | 10.4 Not Detect  | 10.5 Not Detect  | Itk           | 0.425101215 | 0.42105263 | 1.22093023 | 1.2093023 |
| A_55_P2106 | 2833 Detected    | 2598.5 Detected  | 1771.6 Detected  | 1203.7 Detected  | Ankrd52       | 0.424885281 | 0.62534416 | 0.46322879 | 0.6817779 |
| A_55_P2011 | 19.3 Detected    | 2.9 Not Detect   | 3 Not Detect     | 8.2 Not Detect   | Reep1         | 0.424870466 | 0.15544041 | 2.82758621 | 1.0344828 |
| A_55_P2001 | 66.2 Detected    | 31.9 Detected    | 55.3 Detected    | 28.1 Not Detect  | Zscan29       | 0.424471299 | 0.83534743 | 0.88087774 | 1.7335423 |
| A_55_P2136 | 11530.9 Detected | 7959.9 Detected  | 10797.2 Detected | 4890.8 Detected  | Thbs3         | 0.424147291 | 0.93637097 | 0.61442983 | 1.3564492 |
| A_66_P1180 | 49.3 Detected    | 27.4 Detected    | 24.8 Detected    | 20.9 Not Detect  | Rnf38         | 0.423935091 | 0.5030426  | 0.76277372 | 0.9051095 |
| A_55_P2159 | 11235.7 Detected | 1741 Detected    | 697.6 Detected   | 4752.5 Detected  | Lifr          | 0.422982102 | 0.06208781 | 2.72975302 | 0.4006893 |
| A_55_P2102 | 363.2 Detected   | 190.9 Detected   | 141.5 Detected   | 153.6 Detected   | Eaf2          | 0.422907489 | 0.38959251 | 0.80460974 | 0.7412258 |
| A_55_P1955 | 23.9 Detected    | 23.5 Detected    | 16 Not Detect    | 10.1 Not Detect  | Slc1a2        | 0.422594142 | 0.66945607 | 0.42978723 | 0.6808511 |
| A_55_P2112 | 20.6 Detected    | 14.5 Not Detect  | 9.8 Not Detect   | 8.7 Not Detect   | 1700022P22Rik | 0.422330097 | 0.47572816 | 0.6        | 0.6758621 |

|            |         |          |         |            |         |            |         |            |               |             |             |            |            |           |
|------------|---------|----------|---------|------------|---------|------------|---------|------------|---------------|-------------|-------------|------------|------------|-----------|
| A_55_P2090 | 23      | Detected | 7.2     | Not Detect | 3.4     | Not Detect | 9.7     | Not Detect | Vmn1r34       | 0.42173913  | 0.14782609  | 1.34722222 | 0.4722222  |           |
| A_51_P4000 | 24.9    | Detected | 10.3    | Not Detect | 13.9    | Not Detect | 10.5    | Not Detect | 4930548H24Rik | 0.421686747 | 0.55823293  | 1.01941748 | 1.3495146  |           |
| A_55_P2162 | 8786.8  | Detected | 2989    | Detected   | 10216.1 | Detected   | 3704.3  | Detected   | Anp32a        | 0.421575545 | 1.16266445  | 1.23931081 | 3.417899   |           |
| A_55_P1953 | 25.4    | Detected | 7.4     | Not Detect | 12.3    | Not Detect | 10.7    | Not Detect | Mlana         | 0.421259843 | 0.48425197  | 1.44594595 | 1.6621622  |           |
| A_55_P2114 | 1555.1  | Detected | 1046.1  | Detected   | 999.6   | Detected   | 654.3   | Detected   | Rpgr          | 0.420744647 | 0.64278825  | 0.62546602 | 0.9555492  |           |
| A_55_P2028 | 396.5   | Detected | 492.6   | Detected   | 208.7   | Detected   | 166.8   | Detected   | Ncam1         | 0.420680958 | 0.52635561  | 0.33861145 | 0.4236703  |           |
| A_55_P2023 | 2701.9  | Detected | 533.9   | Detected   | 801.6   | Detected   | 1135.8  | Detected   | Epha4         | 0.42037085  | 0.29668011  | 2.12736468 | 1.5014048  |           |
| A_55_P2035 | 2990.2  | Detected | 1116.5  | Detected   | 1660.8  | Detected   | 1256.9  | Detected   | Hipk3         | 0.420339777 | 0.55541435  | 1.12575011 | 1.4875056  |           |
| A_51_P2441 | 25      | Detected | 40.7    | Detected   | 9       | Not Detect | 10.5    | Not Detect | Tktl1         | 0.42        | 0.36        | 0.25798526 | 0.2211302  |           |
| A_51_P4468 | 21.2    | Detected | 10.4    | Not Detect | 3.2     | Not Detect | 8.9     | Not Detect | 6430573F11Rik | 0.419811321 | 0.1509434   | 0.85576923 | 0.3076923  |           |
| A_52_P2146 | 1946    | Detected | 966.4   | Detected   | 1599.1  | Detected   | 815.8   | Detected   | Cflar         | 0.419218911 | 0.8217369   | 0.84416391 | 1.6546978  |           |
| A_55_P1968 | 1707.2  | Detected | 1200.7  | Detected   | 1053.5  | Detected   | 715.4   | Detected   | Rpgr          | 0.419048735 | 0.61709231  | 0.59581911 | 0.8774048  |           |
| A_55_P1960 | 33.9    | Detected | 20.2    | Detected   | 7.5     | Not Detect | 14.2    | Not Detect | Fam217a       | 0.418879056 | 0.22123894  | 0.7029703  | 0.3712871  |           |
| A_55_P2027 | 45.6    | Detected | 37.2    | Detected   | 51.8    | Detected   | 19.1    | Not Detect | Casc5         | 0.418859649 | 1.13596491  | 0.51344086 | 1.3924731  |           |
| A_51_P3575 | 1551.7  | Detected | 1434    | Detected   | 1138    | Detected   | 649.9   | Detected   | Cald1         | 0.41883096  | 0.73338919  | 0.45320781 | 0.7935844  |           |
| A_51_P3036 | 1266.3  | Detected | 1312.6  | Detected   | 115.1   | Detected   | 530.2   | Detected   | Whrn          | 0.41870015  | 0.09089473  | 0.40393113 | 0.0876886  |           |
| A_51_P4806 | 2988.4  | Detected | 3.5     | Not Detect | 5169.6  | Detected   | 1251    | Detected   | Tff2          | 0.418618659 | 1.7298889   | 357.428571 | 1477.0286  |           |
| A_65_P0602 | 170.9   | Detected | 51.4    | Detected   | 7.9     | Not Detect | 71.5    | Detected   | Fam171b       | 0.418373318 | 0.04622586  | 1.39105058 | 0.1536965  |           |
| A_55_P2471 | 25.1    | Detected | 11.4    | Not Detect | 3.8     | Not Detect | 10.5    | Not Detect | 5031434C07Rik | 0.418326693 | 0.15139442  | 0.92105263 | 0.3333333  |           |
| A_52_P1486 | 5320.6  | Detected | 2101.2  | Detected   | 3030.6  | Detected   | 2225.3  | Detected   | Plog1         | 0.418242303 | 0.56959741  | 1.05906149 | 1.4423187  |           |
| A_51_P1312 | 21.3    | Detected | 3.1     | Not Detect | 3.3     | Not Detect | 8.9     | Not Detect | Ptpn20        | 0.417840376 | 0.15492958  | 2.87096774 | 1.0645161  |           |
| A_51_P4449 | 23.7    | Detected | 4.2     | Not Detect | 3.6     | Not Detect | 9.9     | Not Detect | Serpina5      | 0.417721519 | 0.15189873  | 2.35714286 | 0.8571429  |           |
| A_55_P2154 | 41.2    | Detected | 19.9    | Detected   | 23.5    | Detected   | 17.2    | Not Detect | 2810006K23Rik | 0.417475728 | 0.57038835  | 0.86432161 | 1.1809045  |           |
| A_51_P3055 | 5313.8  | Detected | 5446.4  | Detected   | 4773.2  | Detected   | 2217.8  | Detected   | Eif2s3x       | 0.417366103 | 0.8982649   | 0.40720476 | 0.8763954  |           |
| A_51_P4593 | 12326.3 | Detected | 6370.1  | Detected   | 2548.8  | Detected   | 5143.3  | Detected   | Gkap1         | 0.417262277 | 0.20677738  | 0.80741276 | 0.4001193  |           |
| A_55_P2024 | 11192.1 | Detected | 5699    | Detected   | 4367    | Detected   | 4653.6  | Detected   | Ppap2a        | 0.415793283 | 0.39018593  | 0.81656431 | 0.7662748  |           |
| A_55_P2032 | 3063.1  | Detected | 1657.3  | Detected   | 1813    | Detected   | 1273.3  | Detected   | Zcchc11       | 0.415689987 | 0.59188404  | 0.76829783 | 1.093948   |           |
| A_55_P2041 | 22.4    | Detected | 13.8    | Not Detect | 16      | Not Detect | 9.3     | Not Detect | Gm590         | 0.415178571 | 0.71428571  | 0.67391304 | 1.1594203  |           |
| A_55_P2163 | 48.2    | Detected | 7       | Not Detect | 52.7    | Detected   | 20      | Not Detect |               | 4-Sep       | 0.414937759 | 1.093361   | 2.85714286 | 7.5285714 |
| A_55_P2105 | 8137.7  | Detected | 5657.9  | Detected   | 4035    | Detected   | 3375.8  | Detected   | Lrig1         | 0.414834658 | 0.49584035  | 0.59665247 | 0.7131621  |           |
| A_51_P4138 | 3100.8  | Detected | 260.7   | Detected   | 8861    | Detected   | 1286.1  | Detected   | Cfb           | 0.414763932 | 2.85764964  | 4.93325662 | 33.98926   |           |
| A_55_P2017 | 20.5    | Detected | 14.2    | Not Detect | 33      | Detected   | 8.5     | Not Detect | Olfra424      | 0.414634146 | 1.6097561   | 0.59859155 | 2.3239437  |           |
| A_55_P2070 | 382.5   | Detected | 197.5   | Detected   | 257.5   | Detected   | 158.4   | Detected   | Coro7         | 0.414117647 | 0.67320261  | 0.80202532 | 1.3037975  |           |
| A_55_P1956 | 52715.1 | Detected | 31396   | Detected   | 33163.8 | Detected   | 21812.3 | Detected   | Ogfr          | 0.413777077 | 0.62911386  | 0.69474774 | 1.0563065  |           |
| A_55_P2038 | 13025.2 | Detected | 8980.2  | Detected   | 7964.4  | Detected   | 5387.2  | Detected   | Tyro3         | 0.413598256 | 0.61146086  | 0.59989755 | 0.8868845  |           |
| A_51_P1570 | 27735   | Detected | 73800.6 | Detected   | 23550.6 | Detected   | 11440.2 | Detected   | Ctgf          | 0.412482423 | 0.84912926  | 0.155015   | 0.3191112  |           |
| A_55_P2135 | 866.3   | Detected | 688.7   | Detected   | 317.6   | Detected   | 357     | Detected   | Slco1a5       | 0.412097426 | 0.36661665  | 0.51836794 | 0.4611587  |           |
| A_52_P1294 | 80.6    | Detected | 68.1    | Detected   | 41.5    | Detected   | 33.2    | Not Detect | Fzd2          | 0.41191067  | 0.51488834  | 0.48751836 | 0.6093979  |           |
| A_66_P1175 | 23.8    | Detected | 16.6    | Not Detect | 21.5    | Detected   | 9.8     | Not Detect | E030025P04Rik | 0.411764706 | 0.90336134  | 0.59036145 | 1.2951807  |           |
| A_55_P1978 | 98.4    | Detected | 37.4    | Detected   | 51      | Detected   | 40.5    | Not Detect | Zfp945        | 0.411585366 | 0.51829268  | 1.0828877  | 1.3636364  |           |

|            |         |          |         |            |         |            |         |            |               |             |            |            |           |
|------------|---------|----------|---------|------------|---------|------------|---------|------------|---------------|-------------|------------|------------|-----------|
| A_55_P2097 | 26      | Detected | 6.1     | Not Detect | 21.2    | Detected   | 10.7    | Not Detect | Chaf1b        | 0.411538462 | 0.81538462 | 1.75409836 | 3.4754098 |
| A_55_P2016 | 9650    | Detected | 6008.1  | Detected   | 5906.8  | Detected   | 3965.9  | Detected   | Ogfr          | 0.410974093 | 0.61210363 | 0.66009221 | 0.9831394 |
| A_52_P4761 | 22.4    | Detected | 15.2    | Not Detect | 23.9    | Detected   | 9.2     | Not Detect | Gm3604        | 0.410714286 | 1.06696429 | 0.60526316 | 1.5723684 |
| A_55_P1959 | 22.4    | Detected | 23.5    | Detected   | 58.5    | Detected   | 9.2     | Not Detect | Vmn2r18       | 0.410714286 | 2.61160714 | 0.39148936 | 2.4893617 |
| A_65_P0660 | 78.2    | Detected | 42.7    | Detected   | 23.3    | Detected   | 32.1    | Not Detect | Ahr           | 0.410485934 | 0.29795396 | 0.75175644 | 0.5456674 |
| A_55_P1989 | 21.7    | Detected | 4.4     | Not Detect | 8.4     | Not Detect | 8.9     | Not Detect | Tm6sf1        | 0.410138249 | 0.38709677 | 2.02272727 | 1.9090909 |
| A_55_P2028 | 27.8    | Detected | 29.9    | Detected   | 13.4    | Not Detect | 11.4    | Not Detect | Pik3cd        | 0.410071942 | 0.48201439 | 0.3812709  | 0.4481605 |
| A_55_P2008 | 24.9    | Detected | 7.2     | Not Detect | 3.7     | Not Detect | 10.2    | Not Detect | Ch25h         | 0.409638554 | 0.14859438 | 1.41666667 | 0.5138889 |
| A_55_P2109 | 24.9    | Detected | 36.6    | Detected   | 28.8    | Detected   | 10.2    | Not Detect | Tmem5         | 0.409638554 | 1.15662651 | 0.27868852 | 0.7868852 |
| A_55_P1957 | 31.3    | Detected | 17.6    | Detected   | 60.1    | Detected   | 12.8    | Not Detect | Gm3161        | 0.408945687 | 1.9201278  | 0.72727273 | 3.4147727 |
| A_55_P2078 | 24.7    | Detected | 3.6     | Not Detect | 4.7     | Not Detect | 10.1    | Not Detect | Ppp1r10       | 0.408906883 | 0.1902834  | 2.80555556 | 1.3055556 |
| A_55_P1978 | 201.1   | Detected | 568.2   | Detected   | 48.7    | Detected   | 82.2    | Detected   | Vmn2r78       | 0.408751865 | 0.24216808 | 0.14466737 | 0.0857093 |
| A_52_P7635 | 59.7    | Detected | 53.4    | Detected   | 49.3    | Detected   | 24.4    | Not Detect | 2210408I21Rik | 0.408710218 | 0.82579564 | 0.45692884 | 0.923221  |
| A_52_P6284 | 23      | Detected | 20.3    | Detected   | 18.2    | Detected   | 9.4     | Not Detect | Far2          | 0.408695652 | 0.79130435 | 0.46305419 | 0.8965517 |
| A_55_P1974 | 12645.8 | Detected | 8057.7  | Detected   | 6636    | Detected   | 5164.1  | Detected   | Itga3         | 0.408364833 | 0.52475921 | 0.64089008 | 0.8235601 |
| A_52_P5931 | 23690.1 | Detected | 14818.7 | Detected   | 11950.3 | Detected   | 9666.5  | Detected   | Rdh10         | 0.408039645 | 0.50444278 | 0.65231768 | 0.8064338 |
| A_51_P2370 | 29.2    | Detected | 16.4    | Not Detect | 6.7     | Not Detect | 11.9    | Not Detect | Olf1r1198     | 0.407534247 | 0.22945205 | 0.72560976 | 0.4085366 |
| A_52_P6813 | 29.7    | Detected | 21.7    | Detected   | 34.2    | Detected   | 12.1    | Not Detect | G0s2          | 0.407407407 | 1.15151515 | 0.55760369 | 1.5760369 |
| A_55_P1967 | 132.3   | Detected | 125.1   | Detected   | 99.8    | Detected   | 53.9    | Detected   | Mkl2          | 0.407407407 | 0.75434618 | 0.43085532 | 0.7977618 |
| A_52_P8852 | 23.1    | Detected | 17      | Detected   | 3.3     | Not Detect | 9.4     | Not Detect | Acpl2         | 0.406926407 | 0.14285714 | 0.55294118 | 0.1941176 |
| A_55_P2024 | 440.6   | Detected | 420.6   | Detected   | 146.9   | Detected   | 179.1   | Detected   | Tmem53        | 0.406491148 | 0.33340899 | 0.42582026 | 0.349263  |
| A_55_P2150 | 22.4    | Detected | 14.1    | Not Detect | 15.3    | Not Detect | 9.1     | Not Detect | Socs6         | 0.40625     | 0.68303571 | 0.64539007 | 1.0851064 |
| A_55_P1975 | 22.4    | Detected | 18.6    | Detected   | 12      | Not Detect | 9.1     | Not Detect | C030010C08Rik | 0.40625     | 0.53571429 | 0.48924731 | 0.6451613 |
| A_55_P2134 | 127.8   | Detected | 60.7    | Detected   | 10.6    | Not Detect | 51.9    | Not Detect | Whrn          | 0.406103286 | 0.0829421  | 0.85502471 | 0.1746293 |
| A_55_P2071 | 42666.3 | Detected | 6694    | Detected   | 9421.9  | Detected   | 17317.9 | Detected   | Aqp5          | 0.405891769 | 0.22082768 | 2.58707798 | 1.4075142 |
| A_51_P2234 | 2283.8  | Detected | 1403.2  | Detected   | 1305.2  | Detected   | 926.5   | Detected   | Slc39a10      | 0.40568351  | 0.57150363 | 0.66027651 | 0.9301596 |
| A_51_P3245 | 141.4   | Detected | 136.4   | Detected   | 78.6    | Detected   | 57.3    | Detected   | Calcoco2      | 0.40523338  | 0.55586987 | 0.42008798 | 0.5762463 |
| A_55_P2063 | 17608.8 | Detected | 11479.1 | Detected   | 16420   | Detected   | 7131.8  | Detected   | Thbs3         | 0.405013402 | 0.9324883  | 0.62128564 | 1.4304257 |
| A_52_P5751 | 2512.9  | Detected | 1320    | Detected   | 837     | Detected   | 1016.5  | Detected   | Cdon          | 0.404512714 | 0.3330813  | 0.77007576 | 0.6340909 |
| A_55_P2057 | 232.4   | Detected | 134     | Detected   | 147.3   | Detected   | 94      | Detected   | Etohi1        | 0.404475043 | 0.633821   | 0.70149254 | 1.0992537 |
| A_55_P2068 | 9621.1  | Detected | 9251.9  | Detected   | 1932.5  | Detected   | 3890.1  | Detected   | Il6ra         | 0.404330066 | 0.20086061 | 0.42046499 | 0.208876  |
| A_52_P4412 | 24.5    | Detected | 24.6    | Detected   | 3.6     | Not Detect | 9.9     | Not Detect | Chl1          | 0.404081633 | 0.14693878 | 0.40243902 | 0.1463415 |
| A_51_P1835 | 44.8    | Detected | 166.9   | Detected   | 16.7    | Not Detect | 18.1    | Not Detect | Csdc2         | 0.404017857 | 0.37276786 | 0.10844817 | 0.1000599 |
| A_55_P2101 | 25.5    | Detected | 17.7    | Not Detect | 21.1    | Detected   | 10.3    | Not Detect | Zhx3          | 0.403921569 | 0.82745098 | 0.5819209  | 1.1920904 |
| A_51_P2605 | 164.7   | Detected | 129     | Detected   | 113.2   | Detected   | 66.4    | Detected   | Arhgef4       | 0.403157256 | 0.68731026 | 0.51472868 | 0.8775194 |
| A_52_P1028 | 237.8   | Detected | 144.1   | Detected   | 144.1   | Detected   | 95.8    | Detected   | Galnt10       | 0.402859546 | 0.6059714  | 0.6648161  | 1         |
| A_52_P3550 | 10322.7 | Detected | 8495.8  | Detected   | 2218.7  | Detected   | 4158.4  | Detected   | Metrn1        | 0.402840342 | 0.21493408 | 0.48946538 | 0.2611526 |
| A_51_P1882 | 220.2   | Detected | 229.2   | Detected   | 78.2    | Detected   | 88.7    | Detected   | Cd248         | 0.402815622 | 0.3551317  | 0.38699825 | 0.3411867 |
| A_51_P1131 | 846.8   | Detected | 153.6   | Detected   | 88.1    | Detected   | 340.8   | Detected   | Lifr          | 0.402456306 | 0.10403873 | 2.21875    | 0.5735677 |
| A_55_P2142 | 188.2   | Detected | 143.7   | Detected   | 238.9   | Detected   | 75.7    | Detected   | Synj2         | 0.402231668 | 1.26939426 | 0.52679193 | 1.6624913 |

|            |         |          |         |            |         |            |         |            |               |             |            |            |           |
|------------|---------|----------|---------|------------|---------|------------|---------|------------|---------------|-------------|------------|------------|-----------|
| A_52_P5732 | 32466.3 | Detected | 24095.3 | Detected   | 18151.7 | Detected   | 13052.8 | Detected   | Cdc42ep1      | 0.402041501 | 0.55909358 | 0.5417156  | 0.7533295 |
| A_51_P1366 | 1095.9  | Detected | 1681.4  | Detected   | 291.6   | Detected   | 440.2   | Detected   | Ttc7b         | 0.401678985 | 0.26608267 | 0.26180564 | 0.1734269 |
| A_55_P2133 | 5494.3  | Detected | 2074.7  | Detected   | 350.8   | Detected   | 2203.6  | Detected   | Sipa112       | 0.4010702   | 0.06384799 | 1.06212946 | 0.1690847 |
| A_51_P5092 | 11221.4 | Detected | 8379    | Detected   | 7739.9  | Detected   | 4499.7  | Detected   | Hoxa7         | 0.400992746 | 0.6897446  | 0.53702112 | 0.923726  |
| A_55_P2205 | 27.7    | Detected | 22.9    | Detected   | 22.7    | Detected   | 11.1    | Not Detect | AI835735      | 0.400722022 | 0.81949458 | 0.48471616 | 0.9912664 |
| A_55_P2292 | 22.5    | Detected | 14.8    | Not Detect | 3.3     | Not Detect | 9       | Not Detect | D430004P15Rik | 0.4         | 0.14666667 | 0.60810811 | 0.222973  |
| A_55_P1985 | 28      | Detected | 20.7    | Detected   | 31.1    | Detected   | 11.2    | Not Detect | Il3           | 0.4         | 1.11071429 | 0.5410628  | 1.5024155 |
| A_55_P1954 | 848.2   | Detected | 288.8   | Detected   | 294.1   | Detected   | 338.7   | Detected   | Ttc28         | 0.399316199 | 0.34673426 | 1.17278393 | 1.0183518 |
| A_55_P1985 | 26.8    | Detected | 28.1    | Detected   | 9.9     | Not Detect | 10.7    | Not Detect | LOC666692     | 0.399253731 | 0.36940299 | 0.38078292 | 0.3523132 |
| A_55_P2204 | 24.3    | Detected | 63.8    | Detected   | 15.5    | Detected   | 9.7     | Not Detect | Dcl1          | 0.399176955 | 0.63786008 | 0.15203762 | 0.2429467 |
| A_52_P1867 | 22.8    | Detected | 16.9    | Detected   | 11.8    | Not Detect | 9.1     | Not Detect | BC061237      | 0.399122807 | 0.51754386 | 0.53846154 | 0.6982249 |
| A_55_P1993 | 550.8   | Detected | 352.2   | Detected   | 130.6   | Detected   | 219.8   | Detected   | Pltp          | 0.399055919 | 0.23710966 | 0.62407723 | 0.370812  |
| A_51_P2945 | 36.9    | Detected | 8.6     | Not Detect | 11.8    | Not Detect | 14.7    | Not Detect | Ifitm6        | 0.398373984 | 0.3197832  | 1.70930233 | 1.372093  |
| A_55_P1961 | 97.9    | Detected | 18.3    | Detected   | 574.5   | Detected   | 39      | Not Detect | Gsta3         | 0.398365679 | 5.86823289 | 2.13114754 | 31.393443 |
| A_55_P2339 | 48.7    | Detected | 30.4    | Detected   | 37.9    | Detected   | 19.4    | Not Detect | C230006B20    | 0.39835729  | 0.77823409 | 0.63815789 | 1.2467105 |
| A_55_P1991 | 6520.9  | Detected | 3774.6  | Detected   | 5297.8  | Detected   | 2592.6  | Detected   | Basp1         | 0.397583156 | 0.81243387 | 0.68685424 | 1.4035394 |
| A_65_P1067 | 70.2    | Detected | 44.3    | Detected   | 41.5    | Detected   | 27.9    | Not Detect | Tmem44        | 0.397435897 | 0.59116809 | 0.62979684 | 0.9367946 |
| A_55_P2123 | 59.4    | Detected | 23.1    | Detected   | 22.1    | Detected   | 23.6    | Not Detect | AA667203      | 0.397306397 | 0.37205387 | 1.02164502 | 0.95671   |
| A_52_P5108 | 1441.6  | Detected | 646.4   | Detected   | 970.9   | Detected   | 572.7   | Detected   | Bcl2l1        | 0.397266926 | 0.67348779 | 0.88598391 | 1.5020111 |
| A_55_P2091 | 534.9   | Detected | 336.1   | Detected   | 344.7   | Detected   | 211.9   | Detected   | Zcchc11       | 0.396148813 | 0.64441952 | 0.63046712 | 1.0255876 |
| A_55_P2165 | 25.5    | Detected | 14.9    | Not Detect | 21.2    | Detected   | 10.1    | Not Detect | Mtx3          | 0.396078431 | 0.83137255 | 0.67785235 | 1.4228188 |
| A_52_P5599 | 1788.9  | Detected | 877     | Detected   | 1360.1  | Detected   | 708.5   | Detected   | Eif2ak2       | 0.396053441 | 0.76029963 | 0.80786773 | 1.5508552 |
| A_55_P2183 | 50.5    | Detected | 42.3    | Detected   | 27.1    | Detected   | 20      | Not Detect | 4933439G19Rik | 0.396039604 | 0.53663366 | 0.47281324 | 0.6406619 |
| A_55_P2060 | 25      | Detected | 21.7    | Detected   | 24.7    | Detected   | 9.9     | Not Detect | 1700091H14Rik | 0.396       | 0.988      | 0.4562212  | 1.1382488 |
| A_66_P1215 | 23      | Detected | 22.6    | Detected   | 9.6     | Not Detect | 9.1     | Not Detect | Prss22        | 0.395652174 | 0.4173913  | 0.40265487 | 0.4247788 |
| A_55_P2152 | 35.9    | Detected | 24.7    | Detected   | 21.7    | Detected   | 14.2    | Not Detect | Ctps2         | 0.395543175 | 0.60445682 | 0.57489879 | 0.8785425 |
| A_55_P2178 | 22      | Detected | 11      | Not Detect | 45.6    | Detected   | 8.7     | Not Detect | 9030404E10Rik | 0.395454545 | 2.07272727 | 0.79090909 | 4.1454545 |
| A_55_P2021 | 31.9    | Detected | 19.2    | Detected   | 21.2    | Detected   | 12.6    | Not Detect | Klhl15        | 0.394984326 | 0.6645768  | 0.65625    | 1.1041667 |
| A_55_P2061 | 277.6   | Detected | 167.2   | Detected   | 74.6    | Detected   | 109.6   | Detected   | Zfp229        | 0.39481268  | 0.26873199 | 0.65550239 | 0.4461722 |
| A_51_P4181 | 38.5    | Detected | 30.5    | Detected   | 28.7    | Detected   | 15.2    | Not Detect | Tmem119       | 0.394805195 | 0.74545455 | 0.49836066 | 0.9409836 |
| A_51_P4986 | 1342.6  | Detected | 1198.9  | Detected   | 1310    | Detected   | 530     | Detected   | Dfna5         | 0.394756443 | 0.97571875 | 0.4420719  | 1.0926683 |
| A_52_P3862 | 24.6    | Detected | 16      | Not Detect | 20.6    | Detected   | 9.7     | Not Detect | Fktn          | 0.394308943 | 0.83739837 | 0.60625    | 1.2875    |
| A_52_P5140 | 26.4    | Detected | 153.8   | Detected   | 11.8    | Not Detect | 10.4    | Not Detect | Padi4         | 0.393939394 | 0.4469697  | 0.06762029 | 0.076723  |
| A_66_P1134 | 2465    | Detected | 2086.3  | Detected   | 784     | Detected   | 970.9   | Detected   | Sh2b2         | 0.393874239 | 0.31805274 | 0.46536931 | 0.3757849 |
| A_55_P2138 | 106.4   | Detected | 91.2    | Detected   | 40.5    | Detected   | 41.9    | Not Detect | Efnb2         | 0.393796992 | 0.3806391  | 0.45942982 | 0.4440789 |
| A_55_P2037 | 79.3    | Detected | 37.9    | Detected   | 62.2    | Detected   | 31.2    | Not Detect | Rex2          | 0.393442623 | 0.78436318 | 0.823219   | 1.6411609 |
| A_55_P2152 | 10922.9 | Detected | 5609.5  | Detected   | 3617.5  | Detected   | 4297    | Detected   | Ctps2         | 0.393393696 | 0.33118494 | 0.76602193 | 0.6448881 |
| A_55_P2063 | 65.6    | Detected | 51      | Detected   | 48      | Detected   | 25.8    | Not Detect | Spata9        | 0.393292683 | 0.73170732 | 0.50588235 | 0.9411765 |
| A_52_P1354 | 372.1   | Detected | 260.9   | Detected   | 247.1   | Detected   | 146.3   | Detected   | Ndst1         | 0.393173878 | 0.6640688  | 0.56075125 | 0.9471062 |
| A_55_P2029 | 7827.9  | Detected | 8598.7  | Detected   | 2785.5  | Detected   | 3076.8  | Detected   | Fgd3          | 0.393055609 | 0.35584256 | 0.35782153 | 0.3239443 |

|            |         |          |         |            |         |            |         |            |               |             |            |            |           |
|------------|---------|----------|---------|------------|---------|------------|---------|------------|---------------|-------------|------------|------------|-----------|
| A_55_P1974 | 236.1   | Detected | 205.1   | Detected   | 135.4   | Detected   | 92.8    | Detected   | Pdgb          | 0.393053791 | 0.57348581 | 0.45246221 | 0.6601658 |
| A_52_P2290 | 3124.1  | Detected | 1120.7  | Detected   | 855.3   | Detected   | 1227.6  | Detected   | Tmeff2        | 0.392945168 | 0.27377485 | 1.09538681 | 0.7631837 |
| A_52_P1594 | 73.3    | Detected | 33.2    | Detected   | 150.7   | Detected   | 28.8    | Not Detect | AU021092      | 0.392905866 | 2.05593452 | 0.86746988 | 4.5391566 |
| A_55_P1991 | 45.1    | Detected | 65.2    | Detected   | 64.4    | Detected   | 17.7    | Not Detect | Nrg2          | 0.392461197 | 1.42793792 | 0.27147239 | 0.9877301 |
| A_55_P2269 | 1401.8  | Detected | 590.1   | Detected   | 1183.2  | Detected   | 549.3   | Detected   | Pdp1          | 0.391853331 | 0.84405764 | 0.93085918 | 2.0050839 |
| A_52_P1724 | 1451.3  | Detected | 756.6   | Detected   | 705.7   | Detected   | 568.4   | Detected   | Fitm2         | 0.391648867 | 0.4862537  | 0.75125562 | 0.9327254 |
| A_52_P5501 | 448.4   | Detected | 859.7   | Detected   | 173.7   | Detected   | 175.6   | Detected   | Sned1         | 0.39161463  | 0.38737734 | 0.2042573  | 0.2020472 |
| A_55_P2174 | 33.2    | Detected | 29.1    | Detected   | 29.9    | Detected   | 13      | Not Detect | Zfp605        | 0.391566265 | 0.90060241 | 0.4467354  | 1.0274914 |
| A_51_P4219 | 16246.2 | Detected | 8615.7  | Detected   | 12693   | Detected   | 6347.7  | Detected   | Sgms1         | 0.39071906  | 0.78129039 | 0.73675964 | 1.4732407 |
| A_55_P1974 | 43      | Detected | 26.8    | Detected   | 22      | Detected   | 16.8    | Not Detect | Ptges         | 0.390697674 | 0.51162791 | 0.62686567 | 0.8208955 |
| A_55_P2010 | 2719.2  | Detected | 2703.4  | Detected   | 1553.9  | Detected   | 1062    | Detected   | Tnfsf9        | 0.390556046 | 0.57145484 | 0.39283865 | 0.5747947 |
| A_55_P2321 | 25.1    | Detected | 23.1    | Detected   | 17      | Not Detect | 9.8     | Not Detect | Gm16863       | 0.390438247 | 0.67729084 | 0.42424242 | 0.7359307 |
| A_55_P2132 | 166.1   | Detected | 750.6   | Detected   | 133     | Detected   | 64.8    | Detected   | 2010300C02Rik | 0.39012643  | 0.80072246 | 0.08633094 | 0.1771916 |
| A_55_P2083 | 34414   | Detected | 16882.6 | Detected   | 18119.4 | Detected   | 13424.4 | Detected   | Pea15a        | 0.39008543  | 0.52651247 | 0.79516188 | 1.0732589 |
| A_51_P2385 | 3454.7  | Detected | 2387.2  | Detected   | 1450.4  | Detected   | 1345.8  | Detected   | Shisa4        | 0.389556257 | 0.41983385 | 0.5637567  | 0.6075737 |
| A_55_P1952 | 22.6    | Detected | 11.1    | Not Detect | 6.8     | Not Detect | 8.8     | Not Detect | Vmn2r111      | 0.389380531 | 0.30088496 | 0.79279279 | 0.6126126 |
| A_52_P2287 | 26.2    | Detected | 3.6     | Not Detect | 19.1    | Detected   | 10.2    | Not Detect | Rnf150        | 0.389312977 | 0.72900763 | 2.83333333 | 5.3055556 |
| A_52_P3251 | 23.9    | Detected | 13.4    | Not Detect | 3.3     | Not Detect | 9.3     | Not Detect | Zbtb10        | 0.389121339 | 0.13807531 | 0.69402985 | 0.2462687 |
| A_55_P2067 | 22.9    | Detected | 23.1    | Detected   | 7.6     | Not Detect | 8.9     | Not Detect | Boc           | 0.388646288 | 0.33187773 | 0.38528139 | 0.3290043 |
| A_55_P2064 | 1081.1  | Detected | 303.2   | Detected   | 646.5   | Detected   | 420     | Detected   | Gm13154       | 0.388493201 | 0.59800203 | 1.38522427 | 2.1322559 |
| A_55_P2387 | 207.6   | Detected | 215.4   | Detected   | 33.3    | Detected   | 80.6    | Detected   | 9130221J18Rik | 0.388246628 | 0.16040462 | 0.37418756 | 0.1545961 |
| A_55_P2317 | 11550.7 | Detected | 5044.7  | Detected   | 6292.4  | Detected   | 4484.5  | Detected   | E2f1          | 0.388244868 | 0.54476352 | 0.88895276 | 1.2473289 |
| A_55_P2133 | 123.4   | Detected | 263.3   | Detected   | 227.5   | Detected   | 47.9    | Detected   | Gm4610        | 0.388168558 | 1.84359806 | 0.18192176 | 0.8640334 |
| A_51_P3847 | 1178.9  | Detected | 632.8   | Detected   | 684.9   | Detected   | 457.6   | Detected   | Efn4          | 0.388158453 | 0.58096531 | 0.72313527 | 1.0823325 |
| A_51_P3050 | 121.6   | Detected | 112.1   | Detected   | 51.7    | Detected   | 47.2    | Not Detect | Siglecg       | 0.388157895 | 0.42516447 | 0.42105263 | 0.4611954 |
| A_51_P5113 | 336.9   | Detected | 118.3   | Detected   | 114.2   | Detected   | 130.5   | Detected   | Pstpip1       | 0.387355298 | 0.33897299 | 1.10312764 | 0.9653423 |
| A_55_P2121 | 1531.2  | Detected | 1108.7  | Detected   | 1018.1  | Detected   | 593.1   | Detected   | Omp           | 0.38734326  | 0.66490334 | 0.53495084 | 0.9182827 |
| A_55_P2179 | 59.5    | Detected | 29.1    | Detected   | 24.9    | Detected   | 23      | Not Detect | C230013L11Rik | 0.386554622 | 0.41848739 | 0.79037801 | 0.8556701 |
| A_55_P1985 | 25.1    | Detected | 20.1    | Detected   | 13.8    | Not Detect | 9.7     | Not Detect | Trhr2         | 0.386454183 | 0.5498008  | 0.48258706 | 0.6865672 |
| A_55_P1976 | 42.7    | Detected | 34.3    | Detected   | 20.5    | Detected   | 16.5    | Not Detect | Tmod2         | 0.386416862 | 0.48009368 | 0.48104956 | 0.5976676 |
| A_51_P1044 | 1266.2  | Detected | 656.9   | Detected   | 560     | Detected   | 488.2   | Detected   | Dusp10        | 0.385563102 | 0.4422682  | 0.7431877  | 0.852489  |
| A_55_P2101 | 34.5    | Detected | 32.2    | Detected   | 18.2    | Detected   | 13.3    | Not Detect | Ces2f         | 0.385507246 | 0.52753623 | 0.41304348 | 0.5652174 |
| A_55_P2427 | 27.5    | Detected | 19.5    | Detected   | 11.6    | Not Detect | 10.6    | Not Detect | C430002N11Rik | 0.385454545 | 0.42181818 | 0.54358974 | 0.5948718 |
| A_55_P2370 | 74.8    | Detected | 63.6    | Detected   | 45.8    | Detected   | 28.8    | Not Detect | 8430406P12Rik | 0.385026738 | 0.61229947 | 0.45283019 | 0.7201258 |
| A_51_P2437 | 352.4   | Detected | 379.3   | Detected   | 62      | Detected   | 135.6   | Detected   | Slc10a2       | 0.384790011 | 0.17593644 | 0.35750066 | 0.163459  |
| A_51_P4620 | 24.7    | Detected | 66.5    | Detected   | 3.4     | Not Detect | 9.5     | Not Detect | 4930562F07Rik | 0.384615385 | 0.13765182 | 0.14285714 | 0.0511278 |
| A_55_P2174 | 27.3    | Detected | 36.3    | Detected   | 11.9    | Not Detect | 10.5    | Not Detect | Slco5a1       | 0.384615385 | 0.43589744 | 0.2892562  | 0.3278237 |
| A_51_P2370 | 493.8   | Detected | 389.1   | Detected   | 147.5   | Detected   | 189.8   | Detected   | Nog           | 0.38436614  | 0.29870393 | 0.48779234 | 0.3790799 |
| A_55_P2192 | 26.3    | Detected | 6.2     | Not Detect | 5.7     | Not Detect | 10.1    | Not Detect | Lepr          | 0.384030418 | 0.21673004 | 1.62903226 | 0.9193548 |
| A_52_P4342 | 28.4    | Detected | 16      | Not Detect | 5.3     | Not Detect | 10.9    | Not Detect | Dixdc1        | 0.383802817 | 0.18661972 | 0.68125    | 0.33125   |



|            |                  |                  |                  |                               |                   |            |            |           |
|------------|------------------|------------------|------------------|-------------------------------|-------------------|------------|------------|-----------|
| A_55_P2109 | 70.4 Detected    | 52.2 Detected    | 40 Detected      | 27 Not Detect Shb             | 0.383522727       | 0.56818182 | 0.51724138 | 0.7662835 |
| A_55_P2056 | 24 Detected      | 28.1 Detected    | 9.2 Not Detect   | 9.2 Not Detect Col16a1        | 0.383333333       | 0.38333333 | 0.32740214 | 0.3274021 |
| A_55_P2170 | 223.5 Detected   | 30.6 Detected    | 145.2 Detected   | 85.6 Detected Arhgap26        | 0.382997763       | 0.64966443 | 2.79738562 | 4.745098  |
| A_55_P1984 | 22.2 Detected    | 13.7 Not Detect  | 20.1 Detected    | 8.5 Not Detect Olfr1413       | 0.382882883       | 0.90540541 | 0.62043796 | 1.4671533 |
| A_51_P4319 | 109.3 Detected   | 89.4 Detected    | 42.5 Detected    | 41.8 Not Detect Gfod1         | 0.382433669       | 0.38883806 | 0.46756152 | 0.4753915 |
| A_55_P1971 | 5939.7 Detected  | 1161.1 Detected  | 3561.4 Detected  | 2270 Detected Gzme            | 0.382174184       | 0.59959257 | 1.95504263 | 3.0672638 |
| A_55_P1986 | 64.9 Detected    | 55.7 Detected    | 22 Detected      | 24.8 Not Detect Nkpd1         | 0.382126348       | 0.33898305 | 0.44524237 | 0.3949731 |
| A_51_P3839 | 151.4 Detected   | 33.5 Detected    | 118.5 Detected   | 57.8 Detected                 | 4-Sep 0.381770145 | 0.78269485 | 1.72537313 | 3.5373134 |
| A_66_P1100 | 22.8 Detected    | 33.8 Detected    | 10.3 Not Detect  | 8.7 Not Detect Gm12794        | 0.381578947       | 0.45175439 | 0.25739645 | 0.3047337 |
| A_51_P3554 | 44.6 Detected    | 21.5 Detected    | 16 Not Detect    | 17 Not Detect Trib1           | 0.381165919       | 0.35874439 | 0.79069767 | 0.744186  |
| A_51_P1193 | 26.5 Detected    | 50 Detected      | 20 Detected      | 10.1 Not Detect 1700003F12Rik | 0.381132075       | 0.75471698 | 0.202      | 0.4       |
| A_51_P2201 | 23.1 Detected    | 13 Not Detect    | 3.1 Not Detect   | 8.8 Not Detect Notch3         | 0.380952381       | 0.13419913 | 0.67692308 | 0.2384615 |
| A_52_P5223 | 583.8 Detected   | 361.9 Detected   | 211.1 Detected   | 222.4 Detected Zak            | 0.380952381       | 0.36159644 | 0.6145344  | 0.5833103 |
| A_55_P2131 | 1455 Detected    | 762.5 Detected   | 804.1 Detected   | 554.2 Detected Sox4           | 0.380893471       | 0.55264605 | 0.72681967 | 1.0545574 |
| A_55_P2002 | 5082.6 Detected  | 3098.7 Detected  | 2324.7 Detected  | 1935.2 Detected Rgs12         | 0.38075001        | 0.45738402 | 0.62451996 | 0.7502178 |
| A_55_P1955 | 34631.4 Detected | 30088.2 Detected | 19412.9 Detected | 13180.5 Detected Specc1       | 0.380593912       | 0.56055776 | 0.4380621  | 0.6451998 |
| A_55_P2002 | 2330.9 Detected  | 1314 Detected    | 1223.6 Detected  | 886.2 Detected Stx16          | 0.380196491       | 0.52494745 | 0.67442922 | 0.9312024 |
| A_52_P1711 | 52.4 Detected    | 32.9 Detected    | 49.8 Detected    | 19.9 Not Detect Ccdc33        | 0.379770992       | 0.95038168 | 0.60486322 | 1.5136778 |
| A_52_P3389 | 84.8 Detected    | 143.3 Detected   | 43.5 Detected    | 32.2 Not Detect Aspg          | 0.379716981       | 0.5129717  | 0.22470342 | 0.303559  |
| A_55_P2127 | 26.6 Detected    | 16.7 Not Detect  | 6.7 Not Detect   | 10.1 Not Detect Dhx34         | 0.379699248       | 0.2518797  | 0.60479042 | 0.4011976 |
| A_55_P2001 | 22.4 Detected    | 13.7 Not Detect  | 14.4 Not Detect  | 8.5 Not Detect Il19           | 0.379464286       | 0.64285714 | 0.62043796 | 1.0510949 |
| A_55_P2236 | 1758.8 Detected  | 836.6 Detected   | 684.8 Detected   | 666.6 Detected Ppap2a         | 0.379008415       | 0.38935638 | 0.79679656 | 0.8185513 |
| A_66_P1080 | 1152.6 Detected  | 4063.7 Detected  | 45.5 Detected    | 436.7 Detected Ttc39c         | 0.378882526       | 0.03947597 | 0.10746364 | 0.0111967 |
| A_55_P2137 | 22.7 Detected    | 3 Not Detect     | 3.1 Not Detect   | 8.6 Not Detect Mpdz           | 0.378854626       | 0.13656388 | 2.86666667 | 1.0333333 |
| A_55_P1998 | 11788.1 Detected | 8847.5 Detected  | 6573.2 Detected  | 4465.5 Detected Ifitm2        | 0.378814228       | 0.55761319 | 0.50471885 | 0.7429443 |
| A_51_P3018 | 9047.1 Detected  | 3933.5 Detected  | 5665.4 Detected  | 3422.1 Detected St3gal1       | 0.378253805       | 0.62621171 | 0.86998856 | 1.4402949 |
| A_55_P2181 | 41.3 Detected    | 38.4 Detected    | 24.8 Detected    | 15.6 Not Detect Gm5782        | 0.377723971       | 0.60048426 | 0.40625    | 0.6458333 |
| A_55_P2306 | 25.2 Detected    | 18.6 Detected    | 18.8 Detected    | 9.5 Not Detect 4933408A14Rik  | 0.376984127       | 0.74603175 | 0.51075269 | 1.0107527 |
| A_52_P3721 | 1507.3 Detected  | 1254.6 Detected  | 1060.4 Detected  | 567.1 Detected Ctnnal1        | 0.376235653       | 0.70350959 | 0.45201658 | 0.8452096 |
| A_55_P2091 | 1009.9 Detected  | 181 Detected     | 868.3 Detected   | 379.6 Detected Fas            | 0.3758788         | 0.8597881  | 2.09723757 | 4.7972376 |
| A_66_P1262 | 96.9 Detected    | 64.2 Detected    | 126 Detected     | 36.4 Not Detect Itgb3         | 0.375644995       | 1.3003096  | 0.56697819 | 1.9626168 |
| A_55_P2000 | 232.7 Detected   | 180.9 Detected   | 92.3 Detected    | 87.4 Detected 2610203C20Rik   | 0.37559089        | 0.39664804 | 0.48313986 | 0.5102266 |
| A_55_P2128 | 26.1 Detected    | 77.3 Detected    | 7.7 Not Detect   | 9.8 Not Detect Kik6           | 0.375478927       | 0.29501916 | 0.12677878 | 0.0996119 |
| A_52_P4945 | 6316 Detected    | 2424 Detected    | 760.5 Detected   | 2370.3 Detected Fbxl16        | 0.375284991       | 0.12040849 | 0.97784653 | 0.3137376 |
| A_55_P2136 | 98.1 Detected    | 58.1 Detected    | 60.6 Detected    | 36.8 Not Detect D930016D06Rik | 0.375127421       | 0.617737   | 0.63339071 | 1.0430293 |
| A_55_P2187 | 1576.3 Detected  | 318.7 Detected   | 4053.2 Detected  | 591.1 Detected Sncg           | 0.37499207        | 2.57133794 | 1.85472231 | 12.717917 |
| A_52_P4892 | 3451.1 Detected  | 1728.1 Detected  | 1778 Detected    | 1293.1 Detected Adamts1       | 0.374692127       | 0.51519805 | 0.74827846 | 1.0288756 |
| A_52_P2622 | 774 Detected     | 558.2 Detected   | 446.2 Detected   | 290 Detected Fos              | 0.374677003       | 0.57648579 | 0.51952705 | 0.7993551 |
| A_52_P3212 | 28.3 Detected    | 7 Not Detect     | 3.8 Not Detect   | 10.6 Not Detect 4930544M13Rik | 0.374558304       | 0.13427562 | 1.51428571 | 0.5428571 |
| A_55_P2061 | 26.7 Detected    | 24.5 Detected    | 10.1 Not Detect  | 10 Not Detect Cdh24           | 0.374531835       | 0.37827715 | 0.40816327 | 0.4122449 |

|            |         |          |         |            |        |            |        |            |               |             |            |            |           |
|------------|---------|----------|---------|------------|--------|------------|--------|------------|---------------|-------------|------------|------------|-----------|
| A_55_P2097 | 11962.1 | Detected | 7030.7  | Detected   | 4483.8 | Detected   | 4474   | Detected   | Mcc           | 0.374014596 | 0.37483385 | 0.636352   | 0.6377459 |
| A_55_P1983 | 29.5    | Detected | 79.2    | Detected   | 3.8    | Not Detect | 11     | Not Detect | Pcp411        | 0.372881356 | 0.12881356 | 0.13888889 | 0.0479798 |
| A_66_P1377 | 86.9    | Detected | 79.6    | Detected   | 29.5   | Detected   | 32.4   | Not Detect | Gpr161        | 0.372842348 | 0.33947066 | 0.40703518 | 0.370603  |
| A_55_P1968 | 408.6   | Detected | 290     | Detected   | 287.6  | Detected   | 152.2  | Detected   | Rpgr          | 0.372491434 | 0.70386686 | 0.52482759 | 0.9917241 |
| A_55_P2034 | 194.8   | Detected | 98.1    | Detected   | 176.4  | Detected   | 72.5   | Detected   | Vav2          | 0.372176591 | 0.90554415 | 0.73904179 | 1.7981651 |
| A_51_P4640 | 8306.2  | Detected | 4396.5  | Detected   | 3987.6 | Detected   | 3089.9 | Detected   | Chst12        | 0.371999229 | 0.48007512 | 0.70280905 | 0.9069942 |
| A_51_P4744 | 18758.4 | Detected | 7239.3  | Detected   | 8821.5 | Detected   | 6970.4 | Detected   | Socs3         | 0.371588195 | 0.47026932 | 0.96285552 | 1.218557  |
| A_55_P2038 | 156.1   | Detected | 96.6    | Detected   | 64.6   | Detected   | 58     | Detected   | Gas7          | 0.371556694 | 0.41383728 | 0.60041408 | 0.6687371 |
| A_51_P1456 | 166.9   | Detected | 121.2   | Detected   | 70     | Detected   | 61.9   | Detected   | Clec4g        | 0.370880767 | 0.41941282 | 0.51072607 | 0.5775578 |
| A_55_P2132 | 38.3    | Detected | 15.1    | Not Detect | 29     | Detected   | 14.2   | Not Detect | Gm13247       | 0.37075718  | 0.75718016 | 0.94039735 | 1.9205298 |
| A_51_P1655 | 7513.4  | Detected | 3246.8  | Detected   | 213    | Detected   | 2785.2 | Detected   | Twist2        | 0.370697687 | 0.02834935 | 0.85782925 | 0.0656031 |
| A_55_P2049 | 762     | Detected | 376.9   | Detected   | 397.8  | Detected   | 281.6  | Detected   | Atat1         | 0.369553806 | 0.52204724 | 0.74714778 | 1.0554524 |
| A_52_P6256 | 292.7   | Detected | 288.7   | Detected   | 97.1   | Detected   | 108.1  | Detected   | Stau2         | 0.369320123 | 0.33173898 | 0.37443713 | 0.3363353 |
| A_55_P2000 | 610.6   | Detected | 466.5   | Detected   | 388.9  | Detected   | 225.5  | Detected   | Kirrel        | 0.369308877 | 0.63691451 | 0.48338692 | 0.8336549 |
| A_55_P2131 | 385.4   | Detected | 201.3   | Detected   | 248.7  | Detected   | 142.3  | Detected   | Echdc3        | 0.369226777 | 0.64530358 | 0.70690512 | 1.2354694 |
| A_55_P2011 | 144.9   | Detected | 124.4   | Detected   | 105.1  | Detected   | 53.5   | Detected   | Gramd1a       | 0.369220152 | 0.72532781 | 0.43006431 | 0.8448553 |
| A_55_P2038 | 34.2    | Detected | 11.9    | Not Detect | 14.8   | Not Detect | 12.6   | Not Detect | Zfp369        | 0.368421053 | 0.43274854 | 1.05882353 | 1.2436975 |
| A_52_P1805 | 177.7   | Detected | 126.3   | Detected   | 137.6  | Detected   | 65.3   | Detected   | Epb4.1l5      | 0.36747327  | 0.77433877 | 0.51702296 | 1.0894695 |
| A_55_P2123 | 3329.4  | Detected | 2355.4  | Detected   | 1524.4 | Detected   | 1222   | Detected   | Cbfa2t3       | 0.367033099 | 0.45786028 | 0.51880785 | 0.6471937 |
| A_51_P2825 | 772.2   | Detected | 442.8   | Detected   | 49.1   | Detected   | 283.4  | Detected   | Gpr124        | 0.367003367 | 0.06358456 | 0.64001807 | 0.1108853 |
| A_55_P1998 | 2610.5  | Detected | 1712.1  | Detected   | 598.4  | Detected   | 957.8  | Detected   | C1qtnf1       | 0.366902892 | 0.22922812 | 0.55942994 | 0.3495123 |
| A_51_P3336 | 2684.1  | Detected | 12321.8 | Detected   | 2111.2 | Detected   | 983.4  | Detected   | 2010300C02Rik | 0.366379792 | 0.78655788 | 0.07980977 | 0.1713386 |
| A_51_P3948 | 22196.3 | Detected | 4617.4  | Detected   | 9559.2 | Detected   | 8125.6 | Detected   | Tshz1         | 0.366079031 | 0.43066637 | 1.75977823 | 2.070256  |
| A_55_P2053 | 36.9    | Detected | 87.9    | Detected   | 49.6   | Detected   | 13.5   | Not Detect | Ivl           | 0.365853659 | 1.34417344 | 0.15358362 | 0.5642776 |
| A_51_P5156 | 27.9    | Detected | 18      | Not Detect | 14.9   | Not Detect | 10.2   | Not Detect | Col3a1        | 0.365591398 | 0.53405018 | 0.56666667 | 0.8277778 |
| A_52_P2232 | 406.2   | Detected | 246.3   | Detected   | 61.5   | Detected   | 148.5  | Detected   | Zfp37         | 0.365583456 | 0.15140325 | 0.60292326 | 0.2496955 |
| A_55_P2047 | 8984    | Detected | 7217.8  | Detected   | 4504.4 | Detected   | 3284.2 | Detected   | Pdgbf         | 0.365560997 | 0.50138023 | 0.45501399 | 0.6240683 |
| A_55_P1968 | 564.2   | Detected | 2058.7  | Detected   | 35.3   | Detected   | 206.2  | Detected   | Krtap1-5      | 0.365473236 | 0.06256647 | 0.1001603  | 0.0171467 |
| A_55_P1997 | 48.3    | Detected | 65.6    | Detected   | 3.6    | Not Detect | 17.6   | Not Detect | Faxc          | 0.364389234 | 0.07453416 | 0.26829268 | 0.054878  |
| A_66_P1407 | 23.9    | Detected | 50.9    | Detected   | 23.2   | Detected   | 8.7    | Not Detect | Adc           | 0.364016736 | 0.9707113  | 0.17092338 | 0.4557957 |
| A_55_P1970 | 70.1    | Detected | 51.4    | Detected   | 59.4   | Detected   | 25.5   | Not Detect | Ltbp2         | 0.363766049 | 0.84736091 | 0.49610895 | 1.155642  |
| A_55_P2016 | 298.4   | Detected | 261.3   | Detected   | 215.9  | Detected   | 108.3  | Detected   | Ctnnal1       | 0.362935657 | 0.72352547 | 0.41446613 | 0.8262533 |
| A_52_P1612 | 385.5   | Detected | 252.1   | Detected   | 307.1  | Detected   | 139.9  | Detected   | Tcea3         | 0.362905318 | 0.79662776 | 0.55493852 | 1.2181674 |
| A_55_P2040 | 2211.2  | Detected | 737     | Detected   | 577.4  | Detected   | 802.4  | Detected   | Pmp22         | 0.362879884 | 0.26112518 | 1.08873813 | 0.7834464 |
| A_55_P1992 | 23.7    | Detected | 5.8     | Not Detect | 28.4   | Detected   | 8.6    | Not Detect | LOC101056017  | 0.362869198 | 1.19831224 | 1.48275862 | 4.8965517 |
| A_55_P2009 | 75.9    | Detected | 36.4    | Detected   | 49.7   | Detected   | 27.5   | Not Detect | Mapkapk3      | 0.362318841 | 0.65480896 | 0.75549451 | 1.3653846 |
| A_55_P2024 | 144.6   | Detected | 140.5   | Detected   | 95.1   | Detected   | 52.3   | Detected   | Atxn7l1       | 0.361687414 | 0.65767635 | 0.37224199 | 0.6768683 |
| A_52_P3680 | 624.4   | Detected | 296.7   | Detected   | 171.5  | Detected   | 225.8  | Detected   | Slc7a11       | 0.361627162 | 0.27466368 | 0.76103809 | 0.5780249 |
| A_55_P1963 | 725     | Detected | 277.3   | Detected   | 363.3  | Detected   | 261.3  | Detected   | Mbd5          | 0.360413793 | 0.50110345 | 0.94230076 | 1.3101334 |
| A_55_P2126 | 1583.2  | Detected | 1024    | Detected   | 1274   | Detected   | 570.5  | Detected   | Cav1          | 0.360346134 | 0.80469934 | 0.55712891 | 1.2441406 |

|            |                  |                  |                  |                  |               |             |            |            |           |
|------------|------------------|------------------|------------------|------------------|---------------|-------------|------------|------------|-----------|
| A_55_P2048 | 163.5 Detected   | 149.5 Detected   | 55.7 Detected    | 58.9 Detected    | Fggy          | 0.360244648 | 0.34067278 | 0.39397993 | 0.3725753 |
| A_52_P3950 | 39.7 Detected    | 23.6 Detected    | 81.2 Detected    | 14.3 Not Detect  | Gm5077        | 0.360201511 | 2.04534005 | 0.6059322  | 3.440678  |
| A_55_P2123 | 25 Detected      | 4.2 Not Detect   | 8.9 Not Detect   | 9 Not Detect     | Zic5          | 0.36        | 0.356      | 2.14285714 | 2.1190476 |
| A_66_P1344 | 112.8 Detected   | 184.5 Detected   | 42.3 Detected    | 40.6 Not Detect  | Lif           | 0.359929078 | 0.375      | 0.2200542  | 0.2292683 |
| A_55_P2011 | 2552.9 Detected  | 2154.2 Detected  | 1815.2 Detected  | 918.3 Detected   | Gramd1a       | 0.359708567 | 0.71103451 | 0.42628354 | 0.842633  |
| A_55_P2063 | 273.4 Detected   | 227.6 Detected   | 164 Detected     | 98.3 Detected    | Dusp5         | 0.359546452 | 0.59985369 | 0.43189807 | 0.7205624 |
| A_55_P2027 | 717.6 Detected   | 123.5 Detected   | 936.4 Detected   | 258 Detected     | Shc2          | 0.359531773 | 1.30490524 | 2.08906883 | 7.5821862 |
| A_55_P1952 | 10162.2 Detected | 4069 Detected    | 19404.9 Detected | 3653.3 Detected  | Fkbp5         | 0.359498927 | 1.90951762 | 0.89783731 | 4.7689604 |
| A_55_P2013 | 27.9 Detected    | 16.8 Not Detect  | 14.1 Not Detect  | 10 Not Detect    | Gm9573        | 0.358422939 | 0.50537634 | 0.5952381  | 0.8392857 |
| A_52_P2208 | 27.9 Detected    | 45.3 Detected    | 3.5 Not Detect   | 10 Not Detect    | Trib2         | 0.358422939 | 0.12544803 | 0.22075055 | 0.0772627 |
| A_51_P2015 | 29.3 Detected    | 42.1 Detected    | 13 Not Detect    | 10.5 Not Detect  | Rln3          | 0.358361775 | 0.44368601 | 0.24940618 | 0.3087886 |
| A_55_P2219 | 191.5 Detected   | 307.4 Detected   | 126.7 Detected   | 68.6 Detected    | Hoxa4         | 0.358224543 | 0.6616188  | 0.223162   | 0.4121666 |
| A_55_P1982 | 26.8 Detected    | 31.7 Detected    | 17.8 Detected    | 9.6 Not Detect   | Icam2         | 0.358208955 | 0.6641791  | 0.30283912 | 0.5615142 |
| A_52_P1879 | 602.1 Detected   | 381.9 Detected   | 221.9 Detected   | 215.6 Detected   | Lfng          | 0.358080053 | 0.36854343 | 0.56454569 | 0.5810422 |
| A_55_P2373 | 99.3 Detected    | 21.5 Detected    | 34.9 Detected    | 35.5 Not Detect  | A730009E18Rik | 0.357502518 | 0.35146022 | 1.65116279 | 1.6232558 |
| A_52_P6384 | 354 Detected     | 1048.5 Detected  | 85.6 Detected    | 126.5 Detected   | Ccl5          | 0.357344633 | 0.24180791 | 0.12064855 | 0.0816404 |
| A_55_P2417 | 44036.5 Detected | 11691.6 Detected | 5323 Detected    | 15716.3 Detected | Prrx2         | 0.356892578 | 0.120877   | 1.3442386  | 0.4552841 |
| A_52_P3238 | 975.5 Detected   | 576 Detected     | 481 Detected     | 347.8 Detected   | Tnfrsf22      | 0.35653511  | 0.49308047 | 0.60381944 | 0.8350694 |
| A_52_P1313 | 46 Detected      | 21 Detected      | 16.2 Detected    | 16.4 Not Detect  | Camk1d        | 0.356521739 | 0.35217391 | 0.78095238 | 0.7714286 |
| A_51_P4414 | 411.6 Detected   | 288.3 Detected   | 162.3 Detected   | 146.7 Detected   | BC100451      | 0.356413994 | 0.39431487 | 0.50884495 | 0.5629553 |
| A_55_P2017 | 27 Detected      | 24.5 Detected    | 16.3 Not Detect  | 9.6 Not Detect   | 1700022P22Rik | 0.355555556 | 0.6037037  | 0.39183673 | 0.6653061 |
| A_51_P4913 | 3049.7 Detected  | 2689.7 Detected  | 6.5 Not Detect   | 1084.3 Compromis | Col4a2        | 0.355543168 | 0.00213136 | 0.40313046 | 0.0024166 |
| A_51_P2201 | 492.8 Detected   | 373.1 Detected   | 236.4 Detected   | 175.2 Detected   | Nfatc1        | 0.355519481 | 0.47970779 | 0.4695792  | 0.6336103 |
| A_55_P2244 | 24.2 Detected    | 70.2 Detected    | 12.7 Not Detect  | 8.6 Not Detect   | D730045A05Rik | 0.355371901 | 0.52479339 | 0.12250712 | 0.1809117 |
| A_55_P2133 | 17289.2 Detected | 10697.3 Detected | 8230.8 Detected  | 6134.4 Detected  | 9-Mar         | 0.354811096 | 0.47606598 | 0.57345311 | 0.7694278 |
| A_55_P2265 | 25.1 Detected    | 4.1 Not Detect   | 3.2 Not Detect   | 8.9 Not Detect   | 4930432O09Rik | 0.354581673 | 0.12749004 | 2.17073171 | 0.7804878 |
| A_52_P1166 | 250.2 Detected   | 350 Detected     | 74.4 Detected    | 88.7 Detected    | 8430419L09Rik | 0.354516387 | 0.29736211 | 0.25342857 | 0.2125714 |
| A_55_P2109 | 8839.9 Detected  | 3866.6 Detected  | 2675.5 Detected  | 3131.2 Detected  | Ahr           | 0.354212152 | 0.30266179 | 0.80980707 | 0.6919516 |
| A_55_P1971 | 6320.9 Detected  | 1183.1 Detected  | 3678 Detected    | 2237.6 Detected  | Gzme          | 0.354000221 | 0.58187916 | 1.89130251 | 3.108782  |
| A_65_P1091 | 3956.6 Detected  | 9499.8 Detected  | 939.3 Detected   | 1400.4 Detected  | Tgfb2         | 0.353940252 | 0.2374008  | 0.14741363 | 0.0988758 |
| A_51_P2640 | 70.5 Detected    | 57.8 Detected    | 32.8 Detected    | 24.9 Not Detect  | Rab36         | 0.353191489 | 0.46524823 | 0.43079585 | 0.567474  |
| A_66_P1362 | 28.6 Detected    | 12 Not Detect    | 18.7 Detected    | 10.1 Not Detect  | Cnbd2         | 0.353146853 | 0.65384615 | 0.84166667 | 1.5583333 |
| A_52_P1950 | 72.5 Detected    | 208 Detected     | 269.1 Detected   | 25.6 Not Detect  | Arap3         | 0.353103448 | 3.71172414 | 0.12307692 | 1.29375   |
| A_66_P1136 | 323 Detected     | 40.3 Detected    | 81.8 Detected    | 113.8 Detected   | Ripply1       | 0.352321981 | 0.25325077 | 2.82382134 | 2.0297767 |
| A_51_P2528 | 12465.1 Detected | 30139.1 Detected | 2498.1 Detected  | 4390.1 Detected  | Cyr61         | 0.352191318 | 0.20040754 | 0.14566128 | 0.0828857 |
| A_51_P3804 | 14411.6 Detected | 9983.9 Detected  | 11559.5 Detected | 5074.8 Detected  | Scx           | 0.352133004 | 0.80209692 | 0.50829836 | 1.1578141 |
| A_55_P2030 | 79 Detected      | 18 Detected      | 14.8 Not Detect  | 27.8 Not Detect  | Ifna7         | 0.351898734 | 0.18734177 | 1.54444444 | 0.8222222 |
| A_55_P2042 | 27.3 Detected    | 18.3 Detected    | 15.8 Not Detect  | 9.6 Not Detect   | Prune2        | 0.351648352 | 0.57875458 | 0.52459016 | 0.863388  |
| A_52_P5735 | 7883.8 Detected  | 3782.7 Detected  | 4485.4 Detected  | 2769.8 Detected  | Trib1         | 0.35132804  | 0.56893884 | 0.7322283  | 1.1857668 |
| A_55_P2074 | 781.9 Detected   | 588 Detected     | 442.7 Detected   | 274.4 Detected   | Zfp184        | 0.350940018 | 0.56618493 | 0.46666667 | 0.7528912 |

|            |         |          |         |            |        |            |         |            |               |             |            |            |           |
|------------|---------|----------|---------|------------|--------|------------|---------|------------|---------------|-------------|------------|------------|-----------|
| A_51_P4040 | 12635   | Detected | 8871.3  | Detected   | 5889.8 | Detected   | 4433.3  | Detected   | Fzd2          | 0.350874555 | 0.46614958 | 0.4997351  | 0.6639162 |
| A_55_P2128 | 460.3   | Detected | 489.7   | Detected   | 69.5   | Detected   | 161.2   | Detected   | Wbscr27       | 0.350206387 | 0.15098849 | 0.32918113 | 0.1419236 |
| A_55_P2008 | 25.7    | Detected | 35.8    | Detected   | 39.1   | Detected   | 9       | Not Detect | Tmsb15b1      | 0.350194553 | 1.52140078 | 0.25139665 | 1.0921788 |
| A_55_P2181 | 10657.3 | Detected | 7084.8  | Detected   | 3046   | Detected   | 3729.9  | Detected   | A430105I19Rik | 0.349985456 | 0.28581348 | 0.52646511 | 0.4299345 |
| A_55_P2144 | 26.3    | Detected | 37.2    | Detected   | 5      | Not Detect | 9.2     | Not Detect | Hecw2         | 0.349809886 | 0.19011407 | 0.24731183 | 0.1344086 |
| A_51_P4789 | 125.8   | Detected | 50.8    | Detected   | 19.4   | Detected   | 44      | Not Detect | N4bp2I1       | 0.349761526 | 0.15421304 | 0.86614173 | 0.3818898 |
| A_55_P2239 | 141.6   | Detected | 392.2   | Detected   | 124.3  | Detected   | 49.5    | Detected   | Afap1I1       | 0.349576271 | 0.87782486 | 0.12621112 | 0.3169301 |
| A_51_P5108 | 29.2    | Detected | 41.4    | Detected   | 3.7    | Not Detect | 10.2    | Not Detect | Adam12        | 0.349315068 | 0.12671233 | 0.24637681 | 0.089372  |
| A_55_P2076 | 6226.4  | Detected | 3685.2  | Detected   | 164.9  | Detected   | 2172.9  | Detected   | Tead2         | 0.348981755 | 0.026484   | 0.58962879 | 0.0447466 |
| A_55_P2172 | 6921.7  | Detected | 1576.3  | Detected   | 1685.9 | Detected   | 2413.9  | Detected   | Scarf2        | 0.348743806 | 0.24356733 | 1.53137093 | 1.0695299 |
| A_51_P3846 | 138.1   | Detected | 197.6   | Detected   | 32.7   | Detected   | 48.1    | Not Detect | Kirrel3       | 0.348298335 | 0.23678494 | 0.24342105 | 0.1654858 |
| A_55_P2175 | 143.3   | Detected | 108.4   | Detected   | 22.1   | Detected   | 49.9    | Detected   | Gm10375       | 0.348220516 | 0.15422191 | 0.4603321  | 0.2038745 |
| A_51_P1710 | 27.3    | Detected | 59.9    | Detected   | 21.3   | Detected   | 9.5     | Not Detect | Csf2          | 0.347985348 | 0.78021978 | 0.15859766 | 0.3555927 |
| A_55_P2059 | 4201.2  | Detected | 2264.7  | Detected   | 2371.9 | Detected   | 1459.7  | Detected   | Chst14        | 0.347448348 | 0.56457679 | 0.64454453 | 1.0473352 |
| A_52_P4969 | 67.4    | Detected | 94.9    | Detected   | 92.1   | Detected   | 23.4    | Not Detect | Mgat4a        | 0.347181009 | 1.36646884 | 0.24657534 | 0.9704953 |
| A_52_P6402 | 37.5    | Detected | 35.8    | Detected   | 14.5   | Not Detect | 13      | Not Detect | Fmnl2         | 0.346666667 | 0.38666667 | 0.36312849 | 0.4050279 |
| A_55_P2014 | 26      | Detected | 45.8    | Detected   | 5.9    | Not Detect | 9       | Not Detect | Vmn1r44       | 0.346153846 | 0.22692308 | 0.19650655 | 0.128821  |
| A_55_P1958 | 345.8   | Detected | 229.7   | Detected   | 87.4   | Detected   | 119.6   | Detected   | Adam12        | 0.345864662 | 0.25274725 | 0.52067915 | 0.3804963 |
| A_55_P2051 | 27.5    | Detected | 6.4     | Not Detect | 3.8    | Not Detect | 9.5     | Not Detect | Psg22         | 0.345454545 | 0.13818182 | 1.484375   | 0.59375   |
| A_55_P2263 | 116.8   | Detected | 44.6    | Detected   | 83.5   | Detected   | 40.3    | Not Detect | Hal           | 0.345034247 | 0.71489726 | 0.90358744 | 1.8721973 |
| A_51_P2401 | 27.6    | Detected | 23.2    | Detected   | 8.1    | Not Detect | 9.5     | Not Detect | Gng8          | 0.344202899 | 0.29347826 | 0.40948276 | 0.3491379 |
| A_55_P2072 | 43      | Detected | 51.4    | Detected   | 3.2    | Not Detect | 14.8    | Not Detect | Pcdhb16       | 0.344186047 | 0.0744186  | 0.28793774 | 0.0622568 |
| A_55_P2136 | 86.9    | Detected | 33.5    | Detected   | 92.3   | Detected   | 29.9    | Not Detect | LOC628110     | 0.344073648 | 1.06214039 | 0.89253731 | 2.7552239 |
| A_66_P1265 | 25.6    | Detected | 3.1     | Not Detect | 4.7    | Not Detect | 8.8     | Not Detect | Trabd2b       | 0.34375     | 0.18359375 | 2.83870968 | 1.516129  |
| A_52_P3892 | 24.8    | Detected | 13.5    | Not Detect | 3      | Not Detect | 8.5     | Not Detect | Fam115a       | 0.342741935 | 0.12096774 | 0.62962963 | 0.2222222 |
| A_52_P4595 | 29.8    | Detected | 35.7    | Detected   | 27.6   | Detected   | 10.2    | Not Detect | Itga2b        | 0.342281879 | 0.9261745  | 0.28571429 | 0.7731092 |
| A_55_P2091 | 30.7    | Detected | 28.3    | Detected   | 18.8   | Not Detect | 10.5    | Not Detect | Gm10375       | 0.342019544 | 0.61237785 | 0.37102473 | 0.664311  |
| A_51_P4389 | 2650.1  | Detected | 485.7   | Detected   | 4.5    | Not Detect | 905.7   | Detected   | Gpnmb         | 0.341760688 | 0.00169805 | 1.86473132 | 0.009265  |
| A_51_P3660 | 37.2    | Detected | 41.6    | Detected   | 16.5   | Not Detect | 12.7    | Not Detect | Fscn1         | 0.341397849 | 0.44354839 | 0.30528846 | 0.3966346 |
| A_51_P4753 | 4617.8  | Detected | 1843.9  | Detected   | 5151.7 | Detected   | 1575.5  | Detected   | Echdc3        | 0.341179783 | 1.11561783 | 0.85443896 | 2.7939151 |
| A_55_P2187 | 1726.8  | Detected | 703.8   | Detected   | 1152.1 | Detected   | 587.3   | Detected   | Tpm1          | 0.340108872 | 0.66718786 | 0.83447002 | 1.6369707 |
| A_55_P2069 | 71.3    | Detected | 30.5    | Detected   | 30     | Detected   | 24.2    | Not Detect | Prr18         | 0.33941094  | 0.42075736 | 0.79344262 | 0.9836066 |
| A_55_P2015 | 653.5   | Detected | 225.1   | Detected   | 332.1  | Detected   | 221.8   | Detected   | Plcg1         | 0.339403213 | 0.50818669 | 0.98533985 | 1.4753443 |
| A_52_P3989 | 55.4    | Detected | 128.4   | Detected   | 3.5    | Not Detect | 18.8    | Not Detect | Gfra1         | 0.339350181 | 0.0631769  | 0.14641745 | 0.0272586 |
| A_55_P2037 | 257.2   | Detected | 347.7   | Detected   | 87.3   | Detected   | 87.2    | Detected   | Trpm6         | 0.33903577  | 0.33942457 | 0.25079091 | 0.2510785 |
| A_55_P2167 | 52.6    | Detected | 13.4    | Not Detect | 25.7   | Detected   | 17.8    | Not Detect | Zfp944        | 0.338403042 | 0.48859316 | 1.32835821 | 1.9179104 |
| A_52_P6122 | 27.2    | Detected | 17      | Detected   | 23.1   | Detected   | 9.2     | Not Detect | Wtap          | 0.338235294 | 0.84926471 | 0.54117647 | 1.3588235 |
| A_55_P2002 | 56096.2 | Detected | 36040.2 | Detected   | 21.4   | Detected   | 18959.5 | Detected   | Blnk          | 0.337981895 | 0.00038149 | 0.52606534 | 0.0005938 |
| A_55_P2084 | 72.5    | Detected | 35.7    | Detected   | 36.7   | Detected   | 24.5    | Not Detect | Hist1h2ac     | 0.337931034 | 0.5062069  | 0.68627451 | 1.0280112 |
| A_55_P2082 | 5608.5  | Detected | 2568    | Detected   | 3128.5 | Detected   | 1895.1  | Detected   | Trib1         | 0.337897834 | 0.55781403 | 0.73796729 | 1.2182632 |

|            |          |          |         |            |         |            |         |            |               |             |            |            |           |
|------------|----------|----------|---------|------------|---------|------------|---------|------------|---------------|-------------|------------|------------|-----------|
| A_66_P1048 | 2003.9   | Detected | 1185.8  | Detected   | 726.3   | Detected   | 676.1   | Detected   | Ecm1          | 0.337392085 | 0.36244324 | 0.5701636  | 0.6124979 |
| A_52_P6637 | 99.7     | Detected | 341.8   | Detected   | 38      | Detected   | 33.6    | Not Detect | Podnl1        | 0.337011033 | 0.38114343 | 0.0983031  | 0.1111761 |
| A_55_P2145 | 2030.7   | Detected | 2983.4  | Detected   | 509.2   | Detected   | 683.2   | Detected   | Dmpk          | 0.336435712 | 0.25075097 | 0.22900047 | 0.1706778 |
| A_55_P2104 | 1491.8   | Detected | 1170    | Detected   | 195.3   | Detected   | 501.8   | Detected   | Asic1         | 0.336372168 | 0.13091567 | 0.42888889 | 0.1669231 |
| A_55_P2069 | 49.7     | Detected | 50.6    | Detected   | 3.3     | Not Detect | 16.7    | Not Detect | AI429214      | 0.336016097 | 0.06639839 | 0.33003953 | 0.0652174 |
| A_51_P2741 | 27.7     | Detected | 7.9     | Not Detect | 9.4     | Not Detect | 9.3     | Not Detect | 2310001K24Rik | 0.335740072 | 0.33935018 | 1.17721519 | 1.1898734 |
| A_51_P3121 | 1980.8   | Detected | 660.8   | Detected   | 304.3   | Detected   | 664.7   | Detected   | Xdh           | 0.335571486 | 0.1536248  | 1.00590194 | 0.4605024 |
| A_52_P6835 | 92.5     | Detected | 30      | Detected   | 3.6     | Not Detect | 31      | Not Detect | Tbc1d9        | 0.335135135 | 0.03891892 | 1.03333333 | 0.12      |
| A_55_P2106 | 3397.6   | Detected | 1883    | Detected   | 1121    | Detected   | 1137.7  | Detected   | Fam171a1      | 0.334854015 | 0.32993878 | 0.60419543 | 0.5953266 |
| A_55_P2053 | 74.4     | Detected | 47      | Detected   | 49.6    | Detected   | 24.9    | Not Detect | Ppp2r3a       | 0.334677419 | 0.66666667 | 0.52978723 | 1.0553191 |
| A_66_P1142 | 28.4     | Detected | 3.3     | Not Detect | 4.5     | Not Detect | 9.5     | Not Detect | Zic5          | 0.334507042 | 0.1584507  | 2.87878788 | 1.3636364 |
| A_66_P1359 | 33.5     | Detected | 24.8    | Detected   | 4.3     | Not Detect | 11.2    | Not Detect | Metrn1        | 0.334328358 | 0.12835821 | 0.4516129  | 0.1733871 |
| A_55_P2129 | 21413.7  | Detected | 11967.9 | Detected   | 538.7   | Detected   | 7153.4  | Detected   | Tead2         | 0.334057169 | 0.02515679 | 0.59771556 | 0.0450121 |
| A_66_P1396 | 48.5     | Detected | 32.2    | Detected   | 29.4    | Detected   | 16.2    | Not Detect | Zbp1          | 0.334020619 | 0.60618557 | 0.50310559 | 0.9130435 |
| A_55_P1971 | 109466.2 | Detected | 33284.1 | Detected   | 76535.9 | Detected   | 36511   | Detected   | Tmem176b      | 0.333536745 | 0.69917381 | 1.0969502  | 2.2994733 |
| A_51_P4965 | 29.4     | Detected | 56.3    | Detected   | 20.2    | Detected   | 9.8     | Not Detect | Sh2d1b1       | 0.333333333 | 0.68707483 | 0.1740675  | 0.3587922 |
| A_55_P2179 | 30.3     | Detected | 20.5    | Detected   | 38.6    | Detected   | 10.1    | Not Detect | Prickle4      | 0.333333333 | 1.27392739 | 0.49268293 | 1.8829268 |
| A_51_P4053 | 45075.1  | Detected | 25440.4 | Detected   | 17332.6 | Detected   | 15011.3 | Detected   | Ecm1          | 0.333028657 | 0.38452716 | 0.59005755 | 0.6813022 |
| A_51_P3384 | 1903.8   | Detected | 5333.7  | Detected   | 269.1   | Detected   | 632.5   | Detected   | Angptl4       | 0.332230276 | 0.14134888 | 0.1185856  | 0.0504528 |
| A_52_P2261 | 2283.9   | Detected | 908.7   | Detected   | 1528.8  | Detected   | 758.6   | Detected   | Dido1         | 0.332151145 | 0.66938132 | 0.83481897 | 1.6824034 |
| A_55_P2337 | 72.7     | Detected | 32.5    | Detected   | 48.1    | Detected   | 24.1    | Not Detect | Mid1          | 0.331499312 | 0.66162311 | 0.74153846 | 1.48      |
| A_55_P2038 | 168.9    | Detected | 77.4    | Detected   | 89.6    | Detected   | 55.9    | Detected   | Psg16         | 0.330965068 | 0.53049142 | 0.72222222 | 1.1576227 |
| A_51_P3030 | 426.5    | Detected | 121.5   | Detected   | 102.1   | Detected   | 141.1   | Detected   | Ttc28         | 0.330832356 | 0.23939039 | 1.16131687 | 0.8403292 |
| A_55_P2297 | 84.7     | Detected | 51      | Detected   | 60.9    | Detected   | 28      | Not Detect | Mapkbp1       | 0.330578512 | 0.71900826 | 0.54901961 | 1.1941176 |
| A_55_P2187 | 2495.1   | Detected | 1047.5  | Detected   | 1666.4  | Detected   | 822.1   | Detected   | Tpm1          | 0.329485792 | 0.66786902 | 0.784821   | 1.5908353 |
| A_51_P4399 | 33.4     | Detected | 10.7    | Not Detect | 14.6    | Not Detect | 11      | Not Detect | Gp5           | 0.329341317 | 0.43712575 | 1.02803738 | 1.364486  |
| A_55_P2053 | 502.1    | Detected | 307.3   | Detected   | 83.1    | Detected   | 165.2   | Detected   | Mast4         | 0.329018124 | 0.16550488 | 0.53758542 | 0.2704198 |
| A_52_P6783 | 25.9     | Detected | 3       | Not Detect | 6.3     | Not Detect | 8.5     | Not Detect | Slc22a14      | 0.328185328 | 0.24324324 | 2.83333333 | 2.1       |
| A_51_P1921 | 102.7    | Detected | 41.5    | Detected   | 60.8    | Detected   | 33.7    | Not Detect | Zfp74         | 0.328140214 | 0.59201558 | 0.81204819 | 1.4650602 |
| A_51_P1177 | 483.2    | Detected | 307.1   | Detected   | 100.3   | Detected   | 157.8   | Detected   | Figf          | 0.326572848 | 0.2075745  | 0.51383914 | 0.3266037 |
| A_51_P3176 | 973      | Detected | 2603    | Detected   | 185.6   | Detected   | 317.1   | Detected   | Tgfb2         | 0.325899281 | 0.19075026 | 0.12182098 | 0.0713023 |
| A_55_P2068 | 25.5     | Detected | 2.9     | Not Detect | 3       | Not Detect | 8.3     | Not Detect | Gm20878       | 0.325490196 | 0.11764706 | 2.86206897 | 1.0344828 |
| A_55_P1997 | 28.6     | Detected | 36.1    | Detected   | 175.1   | Detected   | 9.3     | Not Detect | Slc6a19       | 0.325174825 | 6.12237762 | 0.25761773 | 4.8504155 |
| A_55_P2006 | 31.7     | Detected | 22.6    | Detected   | 53.7    | Detected   | 10.3    | Not Detect | Cxcl17        | 0.324921136 | 1.69400631 | 0.45575221 | 2.3761062 |
| A_52_P6547 | 34.8     | Detected | 16.2    | Not Detect | 9.6     | Not Detect | 11.3    | Not Detect | Trim69        | 0.324712644 | 0.27586207 | 0.69753086 | 0.5925926 |
| A_55_P2089 | 26.2     | Detected | 20.8    | Detected   | 24.6    | Detected   | 8.5     | Not Detect | Myo3a         | 0.324427481 | 0.9389313  | 0.40865385 | 1.1826923 |
| A_55_P2073 | 26.2     | Detected | 21.6    | Detected   | 19.5    | Detected   | 8.5     | Not Detect | 1700091H14Rik | 0.324427481 | 0.74427481 | 0.39351852 | 0.9027778 |
| A_66_P1310 | 32.1     | Detected | 7.7     | Not Detect | 3.7     | Not Detect | 10.4    | Not Detect | Olfir792      | 0.323987539 | 0.1152648  | 1.35064935 | 0.4805195 |
| A_55_P2324 | 155      | Detected | 181.5   | Detected   | 34.7    | Detected   | 50.2    | Detected   | 5830403F22Rik | 0.323870968 | 0.22387097 | 0.27658402 | 0.1911846 |
| A_55_P2094 | 7271.3   | Detected | 4342.8  | Detected   | 2503.6  | Detected   | 2349.5  | Detected   | Fam171a1      | 0.323119662 | 0.34431257 | 0.54101041 | 0.5764944 |

|            |         |          |         |            |         |            |         |            |               |             |            |            |           |
|------------|---------|----------|---------|------------|---------|------------|---------|------------|---------------|-------------|------------|------------|-----------|
| A_52_P5158 | 31.9    | Detected | 24.3    | Detected   | 3.7     | Not Detect | 10.3    | Not Detect | Vsnl1         | 0.322884013 | 0.11598746 | 0.42386831 | 0.1522634 |
| A_55_P2078 | 250.6   | Detected | 165.6   | Detected   | 215.3   | Detected   | 80.8    | Detected   | Rgs12         | 0.322426177 | 0.85913807 | 0.48792271 | 1.3001208 |
| A_52_P5152 | 155.4   | Detected | 1651    | Detected   | 13.8    | Not Detect | 50.1    | Not Detect | Arhgdib       | 0.322393822 | 0.08880309 | 0.03034525 | 0.0083586 |
| A_51_P2302 | 57.5    | Detected | 81.6    | Detected   | 16.9    | Not Detect | 18.5    | Not Detect | Sorcs2        | 0.32173913  | 0.29391304 | 0.22671569 | 0.2071078 |
| A_52_P1961 | 5774.8  | Detected | 1871.6  | Detected   | 2160.9  | Detected   | 1856.1  | Detected   | Ttyh3         | 0.321413729 | 0.37419478 | 0.99171832 | 1.1545736 |
| A_51_P4699 | 1238.8  | Detected | 644.9   | Detected   | 918.3   | Detected   | 396.8   | Detected   | H2-M3         | 0.320309977 | 0.74128189 | 0.61528919 | 1.4239417 |
| A_51_P5015 | 102.4   | Detected | 20.5    | Detected   | 54.7    | Detected   | 32.7    | Not Detect | Tm4sf20       | 0.319335938 | 0.53417969 | 1.59512195 | 2.6682927 |
| A_55_P1957 | 32.3    | Detected | 22      | Detected   | 48.2    | Detected   | 10.3    | Not Detect | Lilrb4        | 0.318885449 | 1.49226006 | 0.46818182 | 2.1909091 |
| A_55_P1987 | 2040.6  | Detected | 1023.1  | Detected   | 1060.8  | Detected   | 650.2   | Detected   | Pigt          | 0.318631775 | 0.5198471  | 0.6355195  | 1.0368488 |
| A_55_P1993 | 29.2    | Detected | 21.1    | Detected   | 28.5    | Detected   | 9.3     | Not Detect | Vti1a         | 0.318493151 | 0.9760274  | 0.44075829 | 1.3507109 |
| A_51_P4156 | 1939.1  | Detected | 1567    | Detected   | 1330.2  | Detected   | 616.6   | Detected   | Fkbp7         | 0.317982569 | 0.68598835 | 0.39349075 | 0.8488832 |
| A_66_P1335 | 32.1    | Detected | 44.3    | Detected   | 10.5    | Not Detect | 10.2    | Not Detect | AK129341      | 0.317757009 | 0.3271028  | 0.23024831 | 0.2370203 |
| A_55_P2168 | 29.9    | Detected | 7.8     | Not Detect | 3.4     | Not Detect | 9.5     | Not Detect | Dok6          | 0.317725753 | 0.11371237 | 1.21794872 | 0.4358974 |
| A_55_P2075 | 765.1   | Detected | 473.6   | Detected   | 320.4   | Detected   | 243     | Detected   | Tead3         | 0.317605542 | 0.41876879 | 0.51309122 | 0.6765203 |
| A_55_P2035 | 728     | Detected | 195.3   | Detected   | 79.6    | Detected   | 230.8   | Detected   | Nkx1-1        | 0.317032967 | 0.10934066 | 1.18177163 | 0.4075781 |
| A_55_P2149 | 751.5   | Detected | 337.3   | Detected   | 185     | Detected   | 237.9   | Detected   | Vasn          | 0.316566866 | 0.24617432 | 0.70530685 | 0.5484732 |
| A_66_P1151 | 101.6   | Detected | 52.9    | Detected   | 46.1    | Detected   | 32.1    | Not Detect | Cep85l        | 0.315944882 | 0.45374016 | 0.60680529 | 0.8714556 |
| A_52_P5847 | 43.7    | Detected | 46.3    | Detected   | 55.5    | Detected   | 13.8    | Not Detect | Prkar2a       | 0.315789474 | 1.27002288 | 0.29805616 | 1.1987041 |
| A_55_P2165 | 29858.2 | Detected | 12179.1 | Detected   | 15678.2 | Detected   | 9396.9  | Detected   | Cebpbb        | 0.314717565 | 0.52508859 | 0.77155947 | 1.2873037 |
| A_51_P2475 | 52.2    | Detected | 24.9    | Detected   | 10.5    | Not Detect | 16.4    | Not Detect | Ttll6         | 0.314176245 | 0.20114943 | 0.65863454 | 0.4216867 |
| A_52_P8611 | 139.1   | Detected | 51.4    | Detected   | 22.8    | Detected   | 43.7    | Not Detect | Serpina1b     | 0.314162473 | 0.16391086 | 0.85019455 | 0.4435798 |
| A_55_P1985 | 34.4    | Detected | 17.2    | Not Detect | 17.9    | Not Detect | 10.8    | Not Detect | Atp2b4        | 0.313953488 | 0.52034884 | 0.62790698 | 1.0406977 |
| A_51_P1694 | 118.9   | Detected | 87.3    | Detected   | 26.4    | Detected   | 37.2    | Not Detect | Parvb         | 0.312867956 | 0.22203532 | 0.42611684 | 0.3024055 |
| A_52_P7802 | 47529.2 | Detected | 18083.2 | Detected   | 33833.9 | Detected   | 14863.3 | Detected   | Limd2         | 0.312719339 | 0.71185503 | 0.8219397  | 1.8710129 |
| A_55_P2044 | 85.4    | Detected | 11.3    | Not Detect | 3.5     | Not Detect | 26.7    | Not Detect | Syt7          | 0.31264637  | 0.04098361 | 2.36283186 | 0.3097345 |
| A_55_P2034 | 244.6   | Detected | 154.2   | Detected   | 128.4   | Detected   | 76.3    | Detected   | Csf2rb2       | 0.311937858 | 0.52493868 | 0.49481193 | 0.8326848 |
| A_55_P1966 | 732.2   | Detected | 287.8   | Detected   | 159.9   | Detected   | 228.3   | Detected   | Xaf1          | 0.311800055 | 0.21838296 | 0.79325921 | 0.5555942 |
| A_55_P2127 | 30.8    | Detected | 14.4    | Not Detect | 53.7    | Detected   | 9.6     | Not Detect | Crp           | 0.311688312 | 1.74350649 | 0.66666667 | 3.7291667 |
| A_52_P6859 | 1811    | Detected | 194.8   | Detected   | 1840    | Detected   | 563.8   | Detected   | Mettl7b       | 0.311319713 | 1.01601325 | 2.89425051 | 9.4455852 |
| A_55_P1974 | 84.3    | Detected | 73.8    | Detected   | 34.2    | Detected   | 26.2    | Not Detect | Gm2545        | 0.310794781 | 0.40569395 | 0.35501355 | 0.4634146 |
| A_55_P2186 | 1403.7  | Detected | 1742.3  | Detected   | 1265.5  | Detected   | 433.8   | Detected   | Sphk1         | 0.309040393 | 0.90154591 | 0.24898123 | 0.7263387 |
| A_55_P1955 | 927.2   | Detected | 856.2   | Detected   | 510.3   | Detected   | 286.5   | Detected   | Specc1        | 0.308994823 | 0.5503667  | 0.33461808 | 0.5960056 |
| A_55_P1975 | 2513    | Detected | 1401.4  | Detected   | 1465.5  | Detected   | 776     | Detected   | 1810009N02Rik | 0.30879427  | 0.58316753 | 0.55373198 | 1.04574   |
| A_55_P1961 | 47116.1 | Detected | 7887.3  | Detected   | 3481.8  | Detected   | 14535.4 | Detected   | Ly6c1         | 0.308501765 | 0.07389831 | 1.84288667 | 0.4414438 |
| A_55_P1986 | 6706.3  | Detected | 5352.3  | Detected   | 4880.6  | Detected   | 2068.6  | Detected   | Sccpdh        | 0.308456228 | 0.72776345 | 0.38648805 | 0.9118697 |
| A_55_P1975 | 109.8   | Detected | 3.5     | Not Detect | 1181    | Detected   | 33.8    | Not Detect | Ugt2b5        | 0.307832423 | 10.7559199 | 9.65714286 | 337.42857 |
| A_51_P5036 | 180.4   | Detected | 15.1    | Not Detect | 1316.5  | Detected   | 55.5    | Detected   | Gsta3         | 0.307649667 | 7.29767184 | 3.67549669 | 87.18543  |
| A_51_P4757 | 74.2    | Detected | 130.5   | Detected   | 85.7    | Detected   | 22.8    | Not Detect | Ivl           | 0.307277628 | 1.15498652 | 0.17471264 | 0.656705  |
| A_51_P2671 | 234.7   | Detected | 30.3    | Detected   | 35.2    | Detected   | 71.9    | Detected   | Sgpp2         | 0.30634853  | 0.1499787  | 2.37293729 | 1.1617162 |
| A_51_P1700 | 28.1    | Detected | 3.7     | Not Detect | 3.4     | Not Detect | 8.6     | Not Detect | Olf1r1499     | 0.306049822 | 0.12099644 | 2.32432432 | 0.9189189 |

|            |                  |                 |                  |                  |               |             |            |            |           |
|------------|------------------|-----------------|------------------|------------------|---------------|-------------|------------|------------|-----------|
| A_51_P4621 | 6888 Detected    | 5215.5 Detected | 4567.2 Detected  | 2107.1 Detected  | Gpr125        | 0.305908827 | 0.6630662  | 0.40400729 | 0.8756974 |
| A_52_P5680 | 29.1 Detected    | 9.1 Not Detect  | 4.9 Not Detect   | 8.9 Not Detect   | Slc25a40      | 0.305841924 | 0.16838488 | 0.97802198 | 0.5384615 |
| A_55_P2091 | 51.4 Detected    | 28.5 Detected   | 33.9 Detected    | 15.7 Not Detect  | Pea15b        | 0.305447471 | 0.65953307 | 0.55087719 | 1.1894737 |
| A_51_P4568 | 29.5 Detected    | 5.8 Not Detect  | 3.2 Not Detect   | 9 Not Detect     | Fbxl21        | 0.305084746 | 0.10847458 | 1.55172414 | 0.5517241 |
| A_55_P1960 | 29.2 Detected    | 11.3 Not Detect | 7.1 Not Detect   | 8.9 Not Detect   | 4933408B17Rik | 0.304794521 | 0.24315068 | 0.78761062 | 0.6283186 |
| A_51_P5170 | 533.5 Detected   | 648.4 Detected  | 189.1 Detected   | 162.5 Detected   | Gatsl3        | 0.304592315 | 0.35445173 | 0.2506169  | 0.291641  |
| A_55_P2122 | 1386.1 Detected  | 1420.4 Detected | 1495.5 Detected  | 422.1 Detected   | Prkar2b       | 0.304523483 | 1.07892648 | 0.29716981 | 1.0528724 |
| A_51_P4872 | 7194.4 Detected  | 3016.5 Detected | 1765.7 Detected  | 2190.8 Detected  | Vasn          | 0.304514622 | 0.245427   | 0.72627217 | 0.5853473 |
| A_51_P2610 | 49.3 Detected    | 34.4 Detected   | 24.1 Detected    | 15 Not Detect    | Dlx5          | 0.304259635 | 0.48884381 | 0.43604651 | 0.7005814 |
| A_55_P2061 | 41.5 Detected    | 79.6 Detected   | 16.8 Detected    | 12.6 Not Detect  | Olfir95       | 0.303614458 | 0.40481928 | 0.15829146 | 0.2110553 |
| A_55_P2135 | 1322 Detected    | 7255.3 Detected | 616 Detected     | 400.6 Detected   | Evl           | 0.303025719 | 0.46596067 | 0.05521481 | 0.0849034 |
| A_55_P1958 | 32.5 Detected    | 3.5 Not Detect  | 3.4 Not Detect   | 9.8 Not Detect   | H2bfm         | 0.301538462 | 0.10461538 | 2.8        | 0.9714286 |
| A_55_P1989 | 75.7 Detected    | 35.4 Detected   | 26.1 Detected    | 22.8 Not Detect  | Gm14124       | 0.301188904 | 0.34478203 | 0.6440678  | 0.7372881 |
| A_52_P6688 | 32.9 Detected    | 8.6 Not Detect  | 3.5 Not Detect   | 9.9 Not Detect   | 9330154J02Rik | 0.300911854 | 0.10638298 | 1.15116279 | 0.4069767 |
| A_52_P5170 | 115.8 Detected   | 52 Detected     | 34.8 Detected    | 34.8 Not Detect  | Tmeff2        | 0.300518135 | 0.30051813 | 0.66923077 | 0.6692308 |
| A_55_P2059 | 44958.9 Detected | 8267.9 Detected | 15361.2 Detected | 13509.8 Detected | Rbp1          | 0.300492227 | 0.34167206 | 1.63400622 | 1.8579325 |
| A_55_P2087 | 267.8 Detected   | 2103.2 Detected | 9.7 Not Detect   | 80.3 Detected    | Ifitm1        | 0.299850635 | 0.03622106 | 0.03817992 | 0.004612  |
| A_55_P2097 | 6507.3 Detected  | 1036.9 Detected | 532.1 Detected   | 1948.6 Detected  | Gda           | 0.299448312 | 0.0817697  | 1.87925547 | 0.5131642 |
| A_51_P3255 | 33.1 Detected    | 7 Not Detect    | 14.8 Not Detect  | 9.9 Not Detect   | Crip3         | 0.299093656 | 0.44712991 | 1.41428571 | 2.1142857 |
| A_55_P2093 | 41.8 Detected    | 18.2 Detected   | 198.5 Detected   | 12.5 Not Detect  | Pzp           | 0.299043062 | 4.74880383 | 0.68681319 | 10.906593 |
| A_52_P4723 | 57.2 Detected    | 36.5 Detected   | 35 Detected      | 17.1 Not Detect  | Fxyd6         | 0.298951049 | 0.61188811 | 0.46849315 | 0.9589041 |
| A_55_P1971 | 7398 Detected    | 2056.4 Detected | 4914.2 Detected  | 2197.1 Detected  | Tmem176b      | 0.296985672 | 0.66426061 | 1.06842054 | 2.3897102 |
| A_55_P2026 | 31.7 Detected    | 21.8 Detected   | 20.1 Detected    | 9.4 Not Detect   | 4930445E18Rik | 0.296529968 | 0.6340694  | 0.43119266 | 0.9220183 |
| A_55_P2036 | 4395.7 Detected  | 2339.5 Detected | 1064.6 Detected  | 1301.1 Detected  | Chadl         | 0.295993812 | 0.24219123 | 0.55614448 | 0.4550545 |
| A_55_P2089 | 272.1 Detected   | 293.9 Detected  | 27.6 Detected    | 80.5 Detected    | 9830147E19Rik | 0.295847115 | 0.1014333  | 0.27390269 | 0.0939095 |
| A_52_P1179 | 34.2 Detected    | 3.5 Not Detect  | 3.5 Not Detect   | 10.1 Not Detect  | 1700001N15Rik | 0.295321637 | 0.10233918 | 2.88571429 | 1         |
| A_51_P4739 | 864.1 Detected   | 586.5 Detected  | 187.7 Detected   | 254.6 Detected   | Slc22a15      | 0.294641824 | 0.21722023 | 0.4341006  | 0.3200341 |
| A_55_P2118 | 220.2 Detected   | 712.7 Detected  | 98 Detected      | 64.7 Detected    | Col1a1        | 0.293823797 | 0.44504995 | 0.09078154 | 0.1375053 |
| A_55_P2179 | 35.8 Detected    | 10.4 Not Detect | 6.8 Not Detect   | 10.5 Not Detect  | Dmxl2         | 0.293296089 | 0.18994413 | 1.00961538 | 0.6538462 |
| A_55_P2167 | 34.9 Detected    | 31.9 Detected   | 9.1 Not Detect   | 10.2 Not Detect  | Ccdc112       | 0.29226361  | 0.26074499 | 0.31974922 | 0.2852665 |
| A_55_P2017 | 34.3 Detected    | 11.8 Not Detect | 6.9 Not Detect   | 10 Not Detect    | Olfir267      | 0.29154519  | 0.20116618 | 0.84745763 | 0.5847458 |
| A_55_P2329 | 31.6 Detected    | 20.6 Detected   | 7.9 Not Detect   | 9.2 Not Detect   | Frmf6         | 0.291139241 | 0.25       | 0.44660194 | 0.3834951 |
| A_51_P1256 | 42.6 Detected    | 14.2 Not Detect | 20.1 Detected    | 12.4 Not Detect  | Celf5         | 0.291079812 | 0.47183099 | 0.87323944 | 1.415493  |
| A_51_P5012 | 7199.9 Detected  | 8302.5 Detected | 6355.7 Detected  | 2093 Detected    | Sphk1         | 0.290698482 | 0.88274837 | 0.25209274 | 0.7655164 |
| A_52_P2547 | 36.9 Detected    | 122 Detected    | 9.2 Not Detect   | 10.7 Not Detect  | Cntrn5        | 0.2899729   | 0.24932249 | 0.08770492 | 0.0754098 |
| A_55_P2007 | 652.1 Detected   | 335.1 Detected  | 548.8 Detected   | 189 Detected     | Ptpdc1        | 0.289832848 | 0.84158871 | 0.56401074 | 1.6377201 |
| A_55_P2076 | 2466.7 Detected  | 1162.1 Detected | 1043.6 Detected  | 714.5 Detected   | Hmga1         | 0.289658248 | 0.42307536 | 0.61483521 | 0.8980294 |
| A_51_P4309 | 2879.4 Detected  | 1151.9 Detected | 1119.9 Detected  | 833 Detected     | Dusp1         | 0.289296381 | 0.38893519 | 0.72315305 | 0.9722198 |
| A_51_P1442 | 968.9 Detected   | 1059.3 Detected | 260.3 Detected   | 279.4 Detected   | Klf2          | 0.288368253 | 0.26865518 | 0.26375909 | 0.2457283 |
| A_52_P1953 | 1069.1 Detected  | 1004.2 Detected | 347.9 Detected   | 307.6 Detected   | Fgd3          | 0.287718642 | 0.3254139  | 0.30631348 | 0.3464449 |

|            |         |          |        |            |         |            |         |            |               |             |            |            |           |
|------------|---------|----------|--------|------------|---------|------------|---------|------------|---------------|-------------|------------|------------|-----------|
| A_55_P1953 | 44442.7 | Detected | 71433  | Detected   | 99343.6 | Detected   | 12782.2 | Detected   | Fabp5         | 0.287610789 | 2.23531874 | 0.17893971 | 1.3907242 |
| A_55_P2074 | 419.6   | Detected | 74.2   | Detected   | 185.7   | Detected   | 120.2   | Detected   | Lect2         | 0.286463298 | 0.44256435 | 1.61994609 | 2.5026954 |
| A_52_P3173 | 3778    | Detected | 1228.5 | Detected   | 2023.2  | Detected   | 1081.4  | Detected   | Gpr56         | 0.286236104 | 0.53552144 | 0.88026048 | 1.6468864 |
| A_55_P2080 | 205.9   | Detected | 244.6  | Detected   | 84.2    | Detected   | 58.8    | Detected   | Poln          | 0.285575522 | 0.40893638 | 0.24039248 | 0.3442355 |
| A_52_P6867 | 256.7   | Detected | 183.5  | Detected   | 79      | Detected   | 73.3    | Detected   | Gdf11         | 0.285547332 | 0.30775224 | 0.39945504 | 0.4305177 |
| A_55_P2080 | 31.9    | Detected | 39     | Detected   | 12.2    | Not Detect | 9.1     | Not Detect | Poln          | 0.285266458 | 0.38244514 | 0.23333333 | 0.3128205 |
| A_51_P3025 | 36.5    | Detected | 3.7    | Not Detect | 3.7     | Not Detect | 10.4    | Not Detect | Maob          | 0.284931507 | 0.10136986 | 2.81081081 | 1         |
| A_55_P2092 | 57.6    | Detected | 6      | Not Detect | 61.8    | Detected   | 16.4    | Not Detect | D330045A20Rik | 0.284722222 | 1.07291667 | 2.73333333 | 10.3      |
| A_51_P3917 | 36.2    | Detected | 19.3   | Detected   | 26.5    | Detected   | 10.3    | Not Detect | Slc3a1        | 0.284530387 | 0.7320442  | 0.53367876 | 1.373057  |
| A_55_P2055 | 14407.8 | Detected | 4036.1 | Detected   | 4338.6  | Detected   | 4098.1  | Detected   | Gm2016        | 0.284436208 | 0.30112856 | 1.01536136 | 1.0749486 |
| A_51_P4649 | 2626.7  | Detected | 1319.7 | Detected   | 495.3   | Detected   | 746.6   | Detected   | Map1lc3a      | 0.284234972 | 0.1885636  | 0.56573464 | 0.3753126 |
| A_55_P2055 | 11185.8 | Detected | 11691  | Detected   | 10307.9 | Detected   | 3176.4  | Detected   | Prkar2b       | 0.283967173 | 0.92151657 | 0.27169618 | 0.8816953 |
| A_52_P4642 | 30.7    | Detected | 12.8   | Not Detect | 6.8     | Not Detect | 8.7     | Not Detect | 1700009N14Rik | 0.283387622 | 0.22149837 | 0.6796875  | 0.53125   |
| A_55_P2004 | 31.9    | Detected | 3.1    | Not Detect | 3.2     | Not Detect | 9       | Not Detect | C87977        | 0.282131661 | 0.10031348 | 2.90322581 | 1.0322581 |
| A_52_P3421 | 593     | Detected | 220.1  | Detected   | 140.8   | Detected   | 167.3   | Detected   | Zfp532        | 0.282124789 | 0.23743676 | 0.76010904 | 0.6397092 |
| A_55_P2019 | 86.5    | Detected | 47.2   | Detected   | 180.7   | Detected   | 24.4    | Not Detect | Gm3161        | 0.282080925 | 2.08901734 | 0.51694915 | 3.8283898 |
| A_55_P2101 | 2964.9  | Detected | 1190.2 | Detected   | 989.4   | Detected   | 835.7   | Detected   | Arrdc4        | 0.281864481 | 0.33370434 | 0.7021509  | 0.8312889 |
| A_52_P2069 | 35.5    | Detected | 3.5    | Not Detect | 3.5     | Not Detect | 10      | Not Detect | LOC101055647  | 0.281690141 | 0.09859155 | 2.85714286 | 1         |
| A_55_P2021 | 116.8   | Detected | 273.8  | Detected   | 12      | Not Detect | 32.9    | Not Detect | Arc           | 0.281678082 | 0.10273973 | 0.1201607  | 0.0438276 |
| A_55_P2350 | 41.2    | Detected | 87.7   | Detected   | 27.1    | Detected   | 11.6    | Not Detect | Slc37a2       | 0.281553398 | 0.65776699 | 0.1322691  | 0.309008  |
| A_51_P1140 | 3045.6  | Detected | 1643.8 | Detected   | 24.3    | Detected   | 857.3   | Detected   | Ncs1          | 0.281488048 | 0.00797872 | 0.52153547 | 0.0147828 |
| A_55_P2155 | 652.2   | Detected | 299.5  | Detected   | 302.1   | Detected   | 183.1   | Detected   | Tnfrsf22      | 0.280742104 | 0.46320147 | 0.61135225 | 1.0086811 |
| A_55_P2096 | 150.6   | Detected | 20.7   | Detected   | 8.8     | Not Detect | 42.2    | Not Detect | Rnf130        | 0.280212483 | 0.05843293 | 2.03864734 | 0.4251208 |
| A_55_P2174 | 36.1    | Detected | 15.2   | Not Detect | 9.6     | Not Detect | 10.1    | Not Detect | Gm2016        | 0.279778393 | 0.26592798 | 0.66447368 | 0.6315789 |
| A_51_P4123 | 32.9    | Detected | 448.1  | Detected   | 12.9    | Not Detect | 9.2     | Not Detect | Scnn1b        | 0.279635258 | 0.39209726 | 0.02053113 | 0.0287882 |
| A_66_P1124 | 1319.3  | Detected | 1491.8 | Detected   | 1305.3  | Detected   | 368.5   | Detected   | Prkar2b       | 0.279314788 | 0.98938831 | 0.24701703 | 0.8749832 |
| A_55_P2146 | 280.8   | Detected | 2129.7 | Detected   | 7.5     | Not Detect | 78.4    | Detected   | Ifitm1        | 0.279202279 | 0.0267094  | 0.0368127  | 0.0035216 |
| A_51_P3525 | 561.8   | Detected | 99     | Detected   | 45.7    | Detected   | 156.4   | Detected   | St5           | 0.278390886 | 0.08134567 | 1.57979798 | 0.4616162 |
| A_55_P2208 | 36      | Detected | 3.5    | Not Detect | 3.5     | Not Detect | 10      | Not Detect | 4930432N10Rik | 0.277777778 | 0.09722222 | 2.85714286 | 1         |
| A_55_P2120 | 1813.9  | Detected | 1055.5 | Detected   | 482.2   | Detected   | 503.8   | Detected   | Cib2          | 0.277744087 | 0.26583604 | 0.47730933 | 0.4568451 |
| A_55_P1978 | 38.9    | Detected | 15.9   | Not Detect | 11.1    | Not Detect | 10.8    | Not Detect | Chd5          | 0.277634961 | 0.28534704 | 0.67924528 | 0.6981132 |
| A_66_P1007 | 34.6    | Detected | 28.6   | Detected   | 44      | Detected   | 9.6     | Not Detect | Gm5468        | 0.277456647 | 1.2716763  | 0.33566434 | 1.5384615 |
| A_66_P1257 | 1086.8  | Detected | 458.7  | Detected   | 966.7   | Detected   | 301     | Detected   | Slc43a2       | 0.276959882 | 0.88949209 | 0.65620231 | 2.1074777 |
| A_55_P2145 | 34.7    | Detected | 4.6    | Not Detect | 16.3    | Not Detect | 9.6     | Not Detect | 4933406F09Rik | 0.276657061 | 0.46974063 | 2.08695652 | 3.5434783 |
| A_51_P3071 | 1409.1  | Detected | 663    | Detected   | 567.3   | Detected   | 389.4   | Detected   | Ddah1         | 0.276346604 | 0.4025974  | 0.58733032 | 0.8556561 |
| A_51_P5018 | 3400.7  | Detected | 875.2  | Detected   | 273.1   | Detected   | 939.2   | Detected   | Cyp26b1       | 0.276178434 | 0.080307   | 1.07312614 | 0.312043  |
| A_55_P2029 | 93.9    | Detected | 123.4  | Detected   | 9.3     | Not Detect | 25.9    | Not Detect | Adrb2         | 0.275825346 | 0.09904153 | 0.20988655 | 0.0753647 |
| A_51_P1304 | 2744.3  | Detected | 527.9  | Detected   | 759.4   | Detected   | 755.5   | Detected   | Wnt4          | 0.27529789  | 0.27671902 | 1.43114226 | 1.43853   |
| A_52_P4792 | 71      | Detected | 105.1  | Detected   | 14.1    | Not Detect | 19.5    | Not Detect | Col6a3        | 0.274647887 | 0.19859155 | 0.18553758 | 0.1341579 |
| A_51_P4262 | 91.5    | Detected | 44.6   | Detected   | 37.1    | Detected   | 25.1    | Not Detect | Src           | 0.27431694  | 0.40546448 | 0.56278027 | 0.8318386 |



|            |         |          |         |            |         |            |         |            |               |             |            |            |           |
|------------|---------|----------|---------|------------|---------|------------|---------|------------|---------------|-------------|------------|------------|-----------|
| A_51_P3644 | 7843.3  | Detected | 2253.6  | Detected   | 2841    | Detected   | 2149.3  | Detected   | Tnfaip2       | 0.274030064 | 0.36221998 | 0.95371849 | 1.2606496 |
| A_51_P1976 | 34      | Detected | 3.2     | Not Detect | 3.3     | Not Detect | 9.3     | Not Detect | 5730407107Rik | 0.273529412 | 0.09705882 | 2.90625    | 1.03125   |
| A_55_P2064 | 32287.7 | Detected | 15517.1 | Detected   | 11246.4 | Detected   | 8823    | Detected   | Cd44          | 0.273261954 | 0.3483184  | 0.56859851 | 0.7247746 |
| A_51_P1724 | 40      | Detected | 51.8    | Detected   | 8.6     | Not Detect | 10.9    | Not Detect | Krtap4-16     | 0.2725      | 0.215      | 0.21042471 | 0.1660232 |
| A_55_P2186 | 198.7   | Detected | 263.8   | Detected   | 29.4    | Detected   | 54.1    | Detected   | Ttc12         | 0.272269753 | 0.14796175 | 0.20507961 | 0.1114481 |
| A_55_P2098 | 5134.7  | Detected | 1394.1  | Detected   | 1785.3  | Detected   | 1397.9  | Detected   | Tnfaip2       | 0.272245701 | 0.34769315 | 1.00272577 | 1.2806111 |
| A_55_P2147 | 49.6    | Detected | 31.8    | Detected   | 32.2    | Detected   | 13.5    | Not Detect | Maml3         | 0.272177419 | 0.64919355 | 0.4245283  | 1.0125786 |
| A_55_P1961 | 68.4    | Detected | 315.9   | Detected   | 8.3     | Not Detect | 18.6    | Not Detect | Adra1d        | 0.271929825 | 0.12134503 | 0.05887939 | 0.0262741 |
| A_55_P2039 | 9234.2  | Detected | 5833.2  | Detected   | 6495.7  | Detected   | 2509.8  | Detected   | Sgk1          | 0.271793983 | 0.70343939 | 0.43026126 | 1.113574  |
| A_55_P2350 | 128.4   | Detected | 34.8    | Detected   | 3.8     | Not Detect | 34.8    | Not Detect | Akap6         | 0.271028037 | 0.02959502 | 1          | 0.1091954 |
| A_55_P1992 | 34.7    | Detected | 16.5    | Not Detect | 87.3    | Detected   | 9.4     | Not Detect | Gm5622        | 0.270893372 | 2.51585014 | 0.56969697 | 5.2909091 |
| A_51_P4941 | 128.9   | Detected | 218.1   | Detected   | 14      | Not Detect | 34.9    | Not Detect | Alpl          | 0.270752521 | 0.10861133 | 0.16001834 | 0.0641907 |
| A_55_P2181 | 38.8    | Detected | 27.3    | Detected   | 22.3    | Detected   | 10.5    | Not Detect | Dfnb59        | 0.270618557 | 0.57474227 | 0.38461538 | 0.8168498 |
| A_55_P2055 | 39.2    | Detected | 22.3    | Detected   | 25.5    | Detected   | 10.6    | Not Detect | Rab15         | 0.270408163 | 0.6505102  | 0.47533632 | 1.1434978 |
| A_55_P2109 | 37      | Detected | 15.7    | Not Detect | 10      | Not Detect | 10      | Not Detect | Lsmem1        | 0.27027027  | 0.27027027 | 0.63694268 | 0.6369427 |
| A_52_P5293 | 9909.5  | Detected | 6329.7  | Detected   | 1550.3  | Detected   | 2677.7  | Detected   | Rab11fip5     | 0.27021545  | 0.15644583 | 0.42303743 | 0.2449247 |
| A_55_P1979 | 809.6   | Detected | 480.9   | Detected   | 669.7   | Detected   | 218.4   | Detected   | 1700026L06Rik | 0.269762846 | 0.82719862 | 0.45414847 | 1.3925972 |
| A_52_P2151 | 284.7   | Detected | 58.1    | Detected   | 77.9    | Detected   | 76.8    | Detected   | Acot4         | 0.26975764  | 0.27362136 | 1.32185886 | 1.3407917 |
| A_55_P2034 | 37.1    | Detected | 24.4    | Detected   | 13.5    | Not Detect | 10      | Not Detect | Siglecg       | 0.269541779 | 0.3638814  | 0.40983607 | 0.5532787 |
| A_55_P2274 | 31.2    | Detected | 13.7    | Not Detect | 56      | Detected   | 8.4     | Not Detect | A630023A22Rik | 0.269230769 | 1.79487179 | 0.61313869 | 4.0875912 |
| A_55_P2182 | 2962.2  | Detected | 1055.6  | Detected   | 1976.6  | Detected   | 795.4   | Detected   | Limd2         | 0.268516643 | 0.66727432 | 0.75350512 | 1.8724896 |
| A_52_P3999 | 43.6    | Detected | 183.9   | Detected   | 3.6     | Not Detect | 11.7    | Not Detect | Dusp2         | 0.268348624 | 0.08256881 | 0.06362153 | 0.0195759 |
| A_51_P5058 | 3030.9  | Detected | 1456.7  | Detected   | 916.8   | Detected   | 810.8   | Detected   | Lhfp          | 0.2675113   | 0.30248441 | 0.55660054 | 0.6293677 |
| A_55_P2051 | 134.2   | Detected | 91.1    | Detected   | 72.4    | Detected   | 35.9    | Not Detect | Gpr132        | 0.267511177 | 0.53949329 | 0.39407245 | 0.7947311 |
| A_55_P1981 | 37.8    | Detected | 4       | Not Detect | 3.6     | Not Detect | 10.1    | Not Detect | Spink8        | 0.267195767 | 0.0952381  | 2.525      | 0.9       |
| A_51_P1636 | 32.3    | Detected | 3.1     | Not Detect | 3.1     | Not Detect | 8.6     | Not Detect | Olfrr600      | 0.26625387  | 0.09597523 | 2.77419355 | 1         |
| A_51_P4682 | 32.7    | Detected | 22.3    | Detected   | 62.4    | Detected   | 8.7     | Not Detect | Phex          | 0.266055046 | 1.90825688 | 0.39013453 | 2.7982063 |
| A_52_P7135 | 50.5    | Detected | 55.2    | Detected   | 33.2    | Detected   | 13.4    | Not Detect | Psd3          | 0.265346535 | 0.65742574 | 0.24275362 | 0.6014493 |
| A_52_P2514 | 33830.4 | Detected | 6123.2  | Detected   | 18809.2 | Detected   | 8968.3  | Detected   | Cldn2         | 0.26509589  | 0.55598515 | 1.46464267 | 3.0717925 |
| A_51_P5099 | 6431.6  | Detected | 4182.8  | Detected   | 3728.1  | Detected   | 1704.8  | Detected   | Plekho1       | 0.265066235 | 0.57965359 | 0.40757387 | 0.8912929 |
| A_55_P1972 | 20963.5 | Detected | 3915.4  | Detected   | 6111.4  | Detected   | 5554.4  | Detected   | Pcsk6         | 0.264955756 | 0.29152575 | 1.41860346 | 1.5608622 |
| A_51_P4618 | 38.9    | Detected | 158.7   | Detected   | 42.2    | Detected   | 10.3    | Not Detect | Thbs2         | 0.264781491 | 1.0848329  | 0.06490233 | 0.2659105 |
| A_51_P4504 | 44.6    | Detected | 13.3    | Not Detect | 12.9    | Not Detect | 11.8    | Not Detect | Ccdc74a       | 0.264573991 | 0.28923767 | 0.88721805 | 0.9699248 |
| A_51_P2299 | 563.4   | Detected | 1301.7  | Detected   | 53.5    | Detected   | 148.8   | Detected   | Chst7         | 0.264110756 | 0.09495918 | 0.11431205 | 0.0411001 |
| A_55_P1962 | 67.4    | Detected | 96.9    | Detected   | 36.5    | Detected   | 17.8    | Not Detect | Plac1         | 0.264094955 | 0.54154303 | 0.18369453 | 0.376677  |
| A_51_P2769 | 61722.5 | Detected | 46064.7 | Detected   | 20505.8 | Detected   | 16210.4 | Detected   | Gpc1          | 0.262633562 | 0.33222569 | 0.35190504 | 0.4451521 |
| A_55_P2024 | 65.5    | Detected | 37.7    | Detected   | 22      | Detected   | 17.2    | Not Detect | Lrp3          | 0.26259542  | 0.33587786 | 0.45623342 | 0.5835544 |
| A_51_P4359 | 1710.3  | Detected | 1153.4  | Detected   | 769.1   | Detected   | 448.9   | Detected   | Rsph9         | 0.262468573 | 0.44968719 | 0.38919716 | 0.6668112 |
| A_52_P2285 | 40.4    | Detected | 91.4    | Detected   | 9.8     | Not Detect | 10.6    | Not Detect | Gpr176        | 0.262376238 | 0.24257426 | 0.11597374 | 0.107221  |
| A_52_P2505 | 88.3    | Detected | 76.8    | Detected   | 14.1    | Not Detect | 23.1    | Not Detect | Fam115a       | 0.261608154 | 0.1596829  | 0.30078125 | 0.1835938 |

|            |         |          |         |            |         |            |         |            |               |             |            |            |           |
|------------|---------|----------|---------|------------|---------|------------|---------|------------|---------------|-------------|------------|------------|-----------|
| A_51_P4609 | 138     | Detected | 109.8   | Detected   | 50.7    | Detected   | 36.1    | Not Detect | Ccl6          | 0.261594203 | 0.3673913  | 0.3287796  | 0.4617486 |
| A_55_P2014 | 265.8   | Detected | 93.7    | Detected   | 69.2    | Detected   | 69.4    | Detected   | Dhrs9         | 0.26109857  | 0.26034612 | 0.74066169 | 0.7385272 |
| A_52_P2334 | 36.8    | Detected | 116.6   | Detected   | 3.3     | Not Detect | 9.6     | Not Detect | Gata2         | 0.260869565 | 0.08967391 | 0.08233276 | 0.0283019 |
| A_55_P2052 | 45.8    | Detected | 38.5    | Detected   | 17      | Detected   | 11.9    | Not Detect | Synm          | 0.259825328 | 0.37117904 | 0.30909091 | 0.4415584 |
| A_55_P2001 | 40.2    | Detected | 143.2   | Detected   | 4.1     | Not Detect | 10.4    | Not Detect | Pde6h         | 0.258706468 | 0.10199005 | 0.0726257  | 0.0286313 |
| A_66_P1248 | 115.7   | Detected | 47.5    | Detected   | 29.3    | Detected   | 29.9    | Not Detect | Diras2        | 0.258426966 | 0.25324114 | 0.62947368 | 0.6168421 |
| A_51_P4870 | 39.5    | Detected | 4.3     | Not Detect | 27.1    | Detected   | 10.2    | Not Detect | Wfdc12        | 0.258227848 | 0.68607595 | 2.37209302 | 6.3023256 |
| A_55_P2137 | 86.1    | Detected | 49.8    | Detected   | 81.6    | Detected   | 22.2    | Not Detect | Tgfr1         | 0.257839721 | 0.94773519 | 0.44578313 | 1.6385542 |
| A_55_P2064 | 974.8   | Detected | 96.8    | Detected   | 104.4   | Detected   | 251.3   | Detected   | Pdpn          | 0.257796471 | 0.10709889 | 2.59607438 | 1.0785124 |
| A_51_P4190 | 39.2    | Detected | 16.2    | Not Detect | 3.6     | Not Detect | 10.1    | Not Detect | Pde10a        | 0.257653061 | 0.09183673 | 0.62345679 | 0.2222222 |
| A_55_P1997 | 117.4   | Detected | 50.3    | Detected   | 386.8   | Detected   | 30.2    | Not Detect | Agap2         | 0.257240204 | 3.29471891 | 0.60039761 | 7.6898608 |
| A_66_P1064 | 41.6    | Detected | 19.3    | Detected   | 29.2    | Detected   | 10.7    | Not Detect | Ppp2r3a       | 0.257211538 | 0.70192308 | 0.55440415 | 1.5129534 |
| A_55_P2023 | 984.4   | Detected | 324.3   | Detected   | 250     | Detected   | 252.4   | Detected   | Cep112        | 0.256399837 | 0.2539618  | 0.77829171 | 0.7708912 |
| A_55_P1985 | 63373.8 | Detected | 42513   | Detected   | 26815.2 | Detected   | 16233.4 | Detected   | Timp1         | 0.256153174 | 0.42312754 | 0.38184555 | 0.6307529 |
| A_55_P1967 | 36.7    | Detected | 3.3     | Not Detect | 9.2     | Not Detect | 9.4     | Not Detect | Antxr1        | 0.25613079  | 0.2506812  | 2.84848485 | 2.7878788 |
| A_66_P1264 | 37.9    | Detected | 13.4    | Not Detect | 15.5    | Not Detect | 9.7     | Not Detect | Celf6         | 0.255936675 | 0.40897098 | 0.7238806  | 1.1567164 |
| A_51_P3908 | 38.7    | Detected | 24      | Detected   | 3.5     | Not Detect | 9.9     | Not Detect | Wisp2         | 0.255813953 | 0.09043928 | 0.4125     | 0.1458333 |
| A_55_P2107 | 353.5   | Detected | 330.2   | Detected   | 7       | Not Detect | 90.4    | Detected   | Gjc1          | 0.25572843  | 0.01980198 | 0.27377347 | 0.0211993 |
| A_55_P2311 | 57.1    | Detected | 45.2    | Detected   | 34.5    | Detected   | 14.6    | Not Detect | E330024J20Rik | 0.255691769 | 0.60420315 | 0.32300885 | 0.7632743 |
| A_51_P3277 | 131.1   | Detected | 113.9   | Detected   | 14.9    | Not Detect | 33.5    | Not Detect | Ifit1         | 0.25553013  | 0.1136537  | 0.29411765 | 0.1308165 |
| A_52_P5150 | 13730.5 | Detected | 3784.4  | Detected   | 9737.6  | Detected   | 3503.3  | Detected   | Tmem176a      | 0.2551473   | 0.70919486 | 0.92572138 | 2.5730895 |
| A_52_P2208 | 12494.9 | Detected | 3880.2  | Detected   | 29679.7 | Detected   | 3181.9  | Detected   | Tgm2          | 0.2546559   | 2.37534514 | 0.82003505 | 7.6490129 |
| A_55_P1961 | 20026.9 | Detected | 1914.1  | Detected   | 1719.9  | Detected   | 5086.8  | Detected   | Pdpn          | 0.253998372 | 0.08587949 | 2.6575414  | 0.8985424 |
| A_52_P3482 | 52.4    | Detected | 38.3    | Detected   | 43.1    | Detected   | 13.3    | Not Detect | Bcl2l11       | 0.253816794 | 0.82251908 | 0.34725849 | 1.1253264 |
| A_51_P4637 | 67401   | Detected | 16305.8 | Detected   | 11181.4 | Detected   | 17093.3 | Detected   | Timp3         | 0.25360603  | 0.16589368 | 1.0482957  | 0.6857315 |
| A_55_P2415 | 352.1   | Detected | 172.4   | Detected   | 355.7   | Detected   | 89.2    | Detected   | 4931408D14Rik | 0.25333712  | 1.01022437 | 0.51740139 | 2.0632251 |
| A_51_P2560 | 5433.9  | Detected | 3374.4  | Detected   | 1712.6  | Detected   | 1376.5  | Detected   | Tiam2         | 0.253317139 | 0.31516958 | 0.40792437 | 0.5075273 |
| A_55_P1972 | 38.7    | Detected | 53.2    | Detected   | 27.6    | Detected   | 9.8     | Not Detect | Acsm3         | 0.253229974 | 0.71317829 | 0.18421053 | 0.518797  |
| A_55_P2001 | 35.2    | Detected | 25.3    | Detected   | 3.2     | Not Detect | 8.9     | Not Detect | Lce1i         | 0.252840909 | 0.09090909 | 0.35177866 | 0.1264822 |
| A_55_P2022 | 1084.1  | Detected | 666     | Detected   | 178     | Detected   | 273.1   | Detected   | C1qtnf1       | 0.25191403  | 0.1641915  | 0.41006006 | 0.2672673 |
| A_55_P2135 | 41.7    | Detected | 38      | Detected   | 38.7    | Detected   | 10.5    | Not Detect | LOC101056136  | 0.251798561 | 0.92805755 | 0.27631579 | 1.0184211 |
| A_55_P1971 | 57.2    | Detected | 67      | Detected   | 23.3    | Detected   | 14.3    | Not Detect | Fsp1          | 0.25        | 0.40734266 | 0.21343284 | 0.3477612 |
| A_51_P5203 | 32.8    | Detected | 121.3   | Detected   | 3       | Not Detect | 8.2     | Not Detect | Alox12        | 0.25        | 0.09146341 | 0.06760099 | 0.0247321 |
| A_52_P5396 | 674.5   | Detected | 384.6   | Detected   | 196.5   | Detected   | 168.4   | Detected   | Plxna3        | 0.24966642  | 0.29132691 | 0.43785751 | 0.5109204 |
| A_51_P4505 | 40.1    | Detected | 31.6    | Detected   | 13.8    | Not Detect | 10      | Not Detect | Padi3         | 0.249376559 | 0.34413965 | 0.3164557  | 0.4367089 |
| A_55_P2017 | 7372    | Detected | 39378.1 | Detected   | 1140.7  | Detected   | 1837.2  | Detected   | Thbs1         | 0.249213239 | 0.15473413 | 0.04665537 | 0.0289679 |
| A_55_P1979 | 2848.4  | Detected | 1547.9  | Detected   | 2624.5  | Detected   | 708.4   | Detected   | 1700026L06Rik | 0.248701025 | 0.92139447 | 0.4576523  | 1.695523  |
| A_52_P3738 | 4141    | Detected | 978.8   | Detected   | 1161.2  | Detected   | 1028.8  | Detected   | Acvr1b        | 0.248442405 | 0.28041536 | 1.05108296 | 1.1863506 |
| A_55_P2010 | 56.8    | Detected | 50.3    | Detected   | 35.7    | Detected   | 14.1    | Not Detect | Pde4d         | 0.248239437 | 0.62852113 | 0.28031809 | 0.7097416 |
| A_55_P2004 | 36.8    | Detected | 17.7    | Detected   | 8.2     | Not Detect | 9.1     | Not Detect | H2-Eb2        | 0.247282609 | 0.22282609 | 0.51412429 | 0.4632768 |

|            |                  |                  |                  |                  |              |             |            |            |           |
|------------|------------------|------------------|------------------|------------------|--------------|-------------|------------|------------|-----------|
| A_51_P3188 | 116 Detected     | 4 Not Detect     | 377.5 Detected   | 28.6 Not Detect  | Glyat        | 0.246551724 | 3.25431034 | 7.15       | 94.375    |
| A_52_P1160 | 973.7 Detected   | 173 Detected     | 112.4 Detected   | 239.7 Detected   | Gda          | 0.246174386 | 0.11543597 | 1.38554913 | 0.649711  |
| A_52_P6656 | 43.4 Detected    | 52.2 Detected    | 3.8 Not Detect   | 10.6 Not Detect  | Abca1        | 0.244239631 | 0.0875576  | 0.20306513 | 0.0727969 |
| A_51_P2235 | 180.1 Detected   | 269.7 Detected   | 59.1 Detected    | 43.9 Not Detect  | Nmnat2       | 0.24375347  | 0.32815103 | 0.16277345 | 0.2191324 |
| A_51_P1116 | 245.4 Detected   | 74.8 Detected    | 74.2 Detected    | 59.8 Detected    | Arrdc4       | 0.243683782 | 0.30236349 | 0.79946524 | 0.9919786 |
| A_55_P2085 | 92.8 Detected    | 25.4 Detected    | 133.6 Detected   | 22.6 Not Detect  | Anpep        | 0.243534483 | 1.43965517 | 0.88976378 | 5.2598425 |
| A_55_P2094 | 235.6 Detected   | 44.2 Detected    | 130.8 Detected   | 57.2 Detected    | Zfp318       | 0.24278438  | 0.55517827 | 1.29411765 | 2.959276  |
| A_55_P1956 | 48 Detected      | 116.2 Detected   | 7.8 Not Detect   | 11.6 Not Detect  | Dmtn         | 0.241666667 | 0.1625     | 0.09982788 | 0.0671256 |
| A_55_P2034 | 7040.8 Detected  | 2099.5 Detected  | 16109.5 Detected | 1698.6 Detected  | Tgm2         | 0.241250994 | 2.28802125 | 0.80904977 | 7.6730174 |
| A_51_P2587 | 26430.9 Detected | 16660 Detected   | 8742.9 Detected  | 6372.2 Detected  | Smo          | 0.241089028 | 0.33078329 | 0.38248499 | 0.5247839 |
| A_52_P1274 | 37.8 Detected    | 13.8 Not Detect  | 21.1 Detected    | 9.1 Not Detect   | Ypel1        | 0.240740741 | 0.55820106 | 0.65942029 | 1.5289855 |
| A_55_P2086 | 37 Detected      | 15.6 Detected    | 16 Detected      | 8.9 Not Detect   | Zfp651       | 0.240540541 | 0.43243243 | 0.57051282 | 1.025641  |
| A_55_P2173 | 93.9 Detected    | 67.8 Detected    | 68.8 Detected    | 22.5 Not Detect  | Gpr125       | 0.239616613 | 0.73269436 | 0.33185841 | 1.0147493 |
| A_55_P1964 | 45.2 Detected    | 22 Detected      | 22.8 Detected    | 10.8 Not Detect  | Dysf         | 0.238938053 | 0.50442478 | 0.49090909 | 1.0363636 |
| A_52_P8770 | 42.8 Detected    | 6.5 Not Detect   | 3.7 Not Detect   | 10.2 Not Detect  | Thrb         | 0.238317757 | 0.0864486  | 1.56923077 | 0.5692308 |
| A_55_P2181 | 110.8 Detected   | 90.4 Detected    | 15.1 Not Detect  | 26.4 Not Detect  | Ccdc112      | 0.238267148 | 0.13628159 | 0.2920354  | 0.1670354 |
| A_51_P3523 | 43.7 Detected    | 63.5 Detected    | 20.8 Detected    | 10.4 Not Detect  | Ism1         | 0.23798627  | 0.47597254 | 0.16377953 | 0.3275591 |
| A_55_P2004 | 106.7 Detected   | 109.4 Detected   | 58.4 Detected    | 25.3 Not Detect  | Klra2        | 0.237113402 | 0.54732896 | 0.23126143 | 0.5338208 |
| A_52_P5920 | 209 Detected     | 206.9 Detected   | 114.9 Detected   | 49.5 Detected    | Cst6         | 0.236842105 | 0.54976077 | 0.23924601 | 0.5553407 |
| A_52_P4151 | 448.2 Detected   | 165.7 Detected   | 225.1 Detected   | 106.1 Detected   | Wnt6         | 0.236724676 | 0.50223115 | 0.64031382 | 1.3584792 |
| A_55_P2023 | 44.9 Detected    | 12.9 Not Detect  | 77.6 Detected    | 10.6 Not Detect  | Cysltr1      | 0.236080178 | 1.72828508 | 0.82170543 | 6.0155039 |
| A_55_P2130 | 53927.7 Detected | 49513.8 Detected | 13913.7 Detected | 12700.3 Detected | Fn1          | 0.235506057 | 0.25800655 | 0.25650021 | 0.2810065 |
| A_55_P1978 | 38.3 Detected    | 39.6 Detected    | 101.7 Detected   | 9 Not Detect     | LOC101056186 | 0.234986945 | 2.65535248 | 0.22727273 | 2.5681818 |
| A_55_P2075 | 242.7 Detected   | 10.5 Not Detect  | 258.5 Detected   | 57 Detected      | Acnat2       | 0.234857849 | 1.06510095 | 5.42857143 | 24.619048 |
| A_55_P2035 | 46.5 Detected    | 6.5 Not Detect   | 7.2 Not Detect   | 10.9 Not Detect  | Il1f10       | 0.234408602 | 0.15483871 | 1.67692308 | 1.1076923 |
| A_55_P2004 | 2189.8 Detected  | 1181.5 Detected  | 647 Detected     | 511.7 Detected   | Apcdd1       | 0.233674308 | 0.29546077 | 0.43309353 | 0.547609  |
| A_52_P2810 | 2588.1 Detected  | 1070 Detected    | 797.2 Detected   | 604.7 Detected   | Socs5        | 0.233646304 | 0.30802519 | 0.56514019 | 0.7450467 |
| A_55_P2008 | 418.1 Detected   | 187.3 Detected   | 225.1 Detected   | 97.6 Detected    | Dlg4         | 0.233436977 | 0.53838795 | 0.52108916 | 1.2018153 |
| A_51_P1104 | 1641 Detected    | 740.5 Detected   | 674.5 Detected   | 382.3 Detected   | Ddah1        | 0.232967703 | 0.41102986 | 0.51627279 | 0.910871  |
| A_55_P2017 | 3935.9 Detected  | 5928.6 Detected  | 771.7 Detected   | 916.9 Detected   | Il4ra        | 0.232958154 | 0.19606697 | 0.15465709 | 0.1301656 |
| A_51_P4802 | 1538.3 Detected  | 698 Detected     | 335.7 Detected   | 357.9 Detected   | Dlx2         | 0.232659429 | 0.21822791 | 0.51275072 | 0.4809456 |
| A_51_P1436 | 368.6 Detected   | 54.5 Detected    | 212.5 Detected   | 85.6 Detected    | Zfp318       | 0.23223006  | 0.5765057  | 1.5706422  | 3.8990826 |
| A_55_P1992 | 2954.8 Detected  | 900.7 Detected   | 662.1 Detected   | 683.8 Detected   | Celf4        | 0.231420062 | 0.22407608 | 0.7591873  | 0.7350949 |
| A_51_P4835 | 38.9 Detected    | 110.3 Detected   | 83.9 Detected    | 9 Not Detect     | Dock8        | 0.231362468 | 2.15681234 | 0.08159565 | 0.7606528 |
| A_55_P1987 | 370.9 Detected   | 410.9 Detected   | 54.9 Detected    | 85.8 Detected    | Crhr2        | 0.231329199 | 0.14801833 | 0.20880993 | 0.1336092 |
| A_55_P2078 | 50.7 Detected    | 25.5 Detected    | 22.3 Detected    | 11.7 Not Detect  | Fndc7        | 0.230769231 | 0.43984221 | 0.45882353 | 0.8745098 |
| A_55_P2472 | 42.1 Detected    | 38.5 Detected    | 3.5 Not Detect   | 9.7 Not Detect   | Gbp3         | 0.2304038   | 0.08313539 | 0.25194805 | 0.0909091 |
| A_51_P1716 | 51299.4 Detected | 36627.5 Detected | 74832.8 Detected | 11779.8 Detected | Wnt10a       | 0.229628417 | 1.45874611 | 0.32161081 | 2.0430769 |
| A_52_P1020 | 931.5 Detected   | 108.3 Detected   | 784.6 Detected   | 213.5 Detected   | AW112010     | 0.229200215 | 0.84229737 | 1.97137581 | 7.2446907 |
| A_51_P1123 | 453.3 Detected   | 559.5 Detected   | 47.8 Detected    | 103.8 Detected   | Igtp         | 0.228987426 | 0.10544893 | 0.18552279 | 0.0854334 |

|            |                  |                  |                  |                 |               |             |            |            |           |
|------------|------------------|------------------|------------------|-----------------|---------------|-------------|------------|------------|-----------|
| A_52_P2046 | 39 Detected      | 83.6 Detected    | 21 Detected      | 8.9 Not Detect  | Nova1         | 0.228205128 | 0.53846154 | 0.10645933 | 0.2511962 |
| A_55_P2178 | 4384 Detected    | 934.7 Detected   | 970.2 Detected   | 996 Detected    | LOC101056486  | 0.227189781 | 0.22130474 | 1.06558254 | 1.0379801 |
| A_52_P7998 | 7965.8 Detected  | 7254.9 Detected  | 3266.8 Detected  | 1809.2 Detected | Tmem171       | 0.227120942 | 0.41010319 | 0.24937628 | 0.4502888 |
| A_52_P7078 | 42 Detected      | 10.8 Not Detect  | 58.6 Detected    | 9.5 Not Detect  | Brdt          | 0.226190476 | 1.3952381  | 0.87962963 | 5.4259259 |
| A_55_P2304 | 45.1 Detected    | 64.8 Detected    | 6.2 Not Detect   | 10.2 Not Detect | C530044C16Rik | 0.22616408  | 0.13747228 | 0.15740741 | 0.095679  |
| A_52_P4247 | 37.6 Detected    | 34.8 Detected    | 13.4 Not Detect  | 8.5 Not Detect  | Clstn2        | 0.22606383  | 0.35638298 | 0.24425287 | 0.3850575 |
| A_55_P2023 | 44.3 Detected    | 23.9 Detected    | 5.1 Not Detect   | 10 Not Detect   | Gm4759        | 0.225733634 | 0.11512415 | 0.41841004 | 0.2133891 |
| A_55_P2103 | 466.5 Detected   | 335.8 Detected   | 265.7 Detected   | 105.3 Detected  | Sema4d        | 0.225723473 | 0.56956056 | 0.31357951 | 0.7912448 |
| A_55_P2190 | 486.5 Detected   | 457.9 Detected   | 40.6 Detected    | 109.2 Detected  | Fggy          | 0.224460432 | 0.08345324 | 0.23848002 | 0.0886656 |
| A_52_P1174 | 75 Detected      | 65.5 Detected    | 46.3 Detected    | 16.8 Not Detect | Tg            | 0.224       | 0.61733333 | 0.25648855 | 0.7068702 |
| A_55_P2029 | 1592.3 Detected  | 1151.6 Detected  | 808.5 Detected   | 355.9 Detected  | Fgd3          | 0.223513157 | 0.50775608 | 0.30904828 | 0.7020667 |
| A_51_P2408 | 6123.6 Detected  | 6736 Detected    | 6042 Detected    | 1364.2 Detected | Tmem173       | 0.222777451 | 0.98667451 | 0.20252375 | 0.8969715 |
| A_55_P2093 | 1159.4 Detected  | 251.6 Detected   | 225.6 Detected   | 258.1 Detected  | Gm2016        | 0.222615146 | 0.19458341 | 1.02583466 | 0.8966614 |
| A_55_P2063 | 849.6 Detected   | 720.7 Detected   | 195.5 Detected   | 189.1 Detected  | Add2          | 0.22257533  | 0.23010829 | 0.26238379 | 0.271264  |
| A_55_P2021 | 1224.8 Detected  | 386.1 Detected   | 211.4 Detected   | 272.3 Detected  | BB287469      | 0.222322012 | 0.17259961 | 0.70525771 | 0.5475265 |
| A_55_P2234 | 347.5 Detected   | 15 Not Detect    | 337.4 Detected   | 76.7 Detected   | Rnf150        | 0.220719424 | 0.97093525 | 5.11333333 | 22.493333 |
| A_55_P2004 | 41.5 Detected    | 16.2 Detected    | 3.3 Not Detect   | 9.1 Not Detect  | Tceal8        | 0.219277108 | 0.07951807 | 0.5617284  | 0.2037037 |
| A_52_P3079 | 41.5 Detected    | 35 Detected      | 3.6 Not Detect   | 9.1 Not Detect  | Gpr128        | 0.219277108 | 0.08674699 | 0.26       | 0.1028571 |
| A_55_P2197 | 107.2 Detected   | 185.6 Detected   | 88.1 Detected    | 23.5 Not Detect | 3110001N23Rik | 0.219216418 | 0.82182836 | 0.12661638 | 0.4746767 |
| A_55_P2037 | 6748.3 Detected  | 264.1 Detected   | 28724.3 Detected | 1476.4 Detected | Trf           | 0.218781026 | 4.25652387 | 5.5903067  | 108.76297 |
| A_55_P1966 | 148.7 Detected   | 71.8 Detected    | 34.1 Detected    | 32.5 Not Detect | Xaf1          | 0.218560861 | 0.22932078 | 0.45264624 | 0.4749304 |
| A_52_P3656 | 45.8 Detected    | 42.9 Detected    | 13.5 Not Detect  | 10 Not Detect   | Lrrc4c        | 0.218340611 | 0.29475983 | 0.23310023 | 0.3146853 |
| A_55_P2037 | 3098.6 Detected  | 125.6 Detected   | 14064.9 Detected | 675.2 Detected  | Trf           | 0.21790486  | 4.53911444 | 5.37579618 | 111.98169 |
| A_55_P2002 | 178.5 Detected   | 106.5 Detected   | 66 Detected      | 38.7 Not Detect | Rgs12         | 0.216806723 | 0.3697479  | 0.36338028 | 0.6197183 |
| A_55_P2134 | 46.2 Detected    | 67.8 Detected    | 42.7 Detected    | 10 Not Detect   | Uty           | 0.216450216 | 0.92424242 | 0.14749263 | 0.6297935 |
| A_55_P2398 | 59.3 Detected    | 16.2 Detected    | 3.2 Not Detect   | 12.8 Not Detect | LOC552912     | 0.215851602 | 0.0539629  | 0.79012346 | 0.1975309 |
| A_55_P2064 | 16768.9 Detected | 9666.4 Detected  | 5882.6 Detected  | 3617.7 Detected | Col7a1        | 0.215738659 | 0.35080417 | 0.37425515 | 0.6085616 |
| A_55_P2121 | 25577.4 Detected | 13278.2 Detected | 4894.6 Detected  | 5514.6 Detected | Ier5l         | 0.215604401 | 0.19136425 | 0.41531232 | 0.3686192 |
| A_55_P2109 | 47.9 Detected    | 18.4 Detected    | 6.7 Not Detect   | 10.3 Not Detect | Tcf7          | 0.215031315 | 0.13987474 | 0.55978261 | 0.3641304 |
| A_55_P2158 | 46.7 Detected    | 18.2 Detected    | 4 Not Detect     | 10 Not Detect   | Dixdc1        | 0.214132762 | 0.0856531  | 0.54945055 | 0.2197802 |
| A_55_P2161 | 51.4 Detected    | 23.1 Detected    | 66.5 Detected    | 11 Not Detect   | Nrip2         | 0.214007782 | 1.29377432 | 0.47619048 | 2.8787879 |
| A_51_P4995 | 933.7 Detected   | 706.3 Detected   | 273 Detected     | 199.5 Detected  | Cd276         | 0.21366606  | 0.29238513 | 0.28245788 | 0.3865213 |
| A_55_P2028 | 6322.2 Detected  | 939.6 Detected   | 163.7 Detected   | 1348.2 Detected | Rnf130        | 0.213248553 | 0.02589289 | 1.4348659  | 0.1742231 |
| A_55_P2166 | 37663.7 Detected | 18020.7 Detected | 16966.1 Detected | 8014.5 Detected | Cd44          | 0.212791096 | 0.45046291 | 0.44473855 | 0.9414784 |
| A_52_P1411 | 287.3 Detected   | 259.1 Detected   | 12 Not Detect    | 61.1 Detected   | Fggy          | 0.212669683 | 0.04176819 | 0.23581629 | 0.0463142 |
| A_51_P2047 | 73.4 Detected    | 88.9 Detected    | 35.3 Detected    | 15.6 Not Detect | Cd34          | 0.21253406  | 0.48092643 | 0.17547807 | 0.3970754 |
| A_55_P2124 | 12425.6 Detected | 6170.8 Detected  | 3828.5 Detected  | 2639.8 Detected | Col18a1       | 0.212448493 | 0.30811389 | 0.42778894 | 0.620422  |
| A_55_P2064 | 211.7 Detected   | 101.5 Detected   | 199.7 Detected   | 44.9 Not Detect | Capzb         | 0.212092584 | 0.94331601 | 0.44236453 | 1.9674877 |
| A_55_P2029 | 108.4 Detected   | 24.2 Detected    | 24.6 Detected    | 22.9 Not Detect | Pex11g        | 0.211254613 | 0.22693727 | 0.94628099 | 1.0165289 |
| A_55_P2093 | 41.7 Detected    | 10.5 Not Detect  | 3.2 Not Detect   | 8.8 Not Detect  | Meig1         | 0.211031175 | 0.07673861 | 0.83809524 | 0.3047619 |

|            |         |          |         |            |        |            |        |            |               |             |            |            |           |
|------------|---------|----------|---------|------------|--------|------------|--------|------------|---------------|-------------|------------|------------|-----------|
| A_51_P4549 | 54.1    | Detected | 33.9    | Detected   | 4.3    | Not Detect | 11.4   | Not Detect | Tmcc2         | 0.210720887 | 0.07948244 | 0.33628319 | 0.1268437 |
| A_55_P2077 | 122.9   | Detected | 51      | Detected   | 24.4   | Detected   | 25.8   | Not Detect | Gm8300        | 0.20992677  | 0.19853539 | 0.50588235 | 0.4784314 |
| A_66_P1225 | 2769.9  | Detected | 426.9   | Detected   | 1356.5 | Detected   | 579.9  | Detected   | Cldn2         | 0.209357739 | 0.48972887 | 1.35839775 | 3.1775591 |
| A_55_P2388 | 45.4    | Detected | 12.6    | Not Detect | 18.8   | Detected   | 9.5    | Not Detect | 4731419109Rik | 0.209251101 | 0.41409692 | 0.75396825 | 1.4920635 |
| A_55_P2057 | 45.9    | Detected | 6.1     | Not Detect | 14.2   | Not Detect | 9.6    | Not Detect | Lipn          | 0.209150327 | 0.30936819 | 1.57377049 | 2.3278689 |
| A_51_P1288 | 10602.9 | Detected | 23975.5 | Detected   | 692    | Detected   | 2212.6 | Detected   | Ifitm3        | 0.208678758 | 0.06526516 | 0.09228588 | 0.0288628 |
| A_55_P2069 | 1239.4  | Detected | 332.3   | Detected   | 689.3  | Detected   | 256.3  | Detected   | Tspan17       | 0.20679361  | 0.5561562  | 0.771291   | 2.0743304 |
| A_51_P3243 | 112.7   | Detected | 79.5    | Detected   | 3.1    | Not Detect | 23.3   | Not Detect | Mylip         | 0.206743567 | 0.02750665 | 0.29308176 | 0.0389937 |
| A_52_P8784 | 41.2    | Detected | 16.4    | Detected   | 24.8   | Detected   | 8.5    | Not Detect | Aldh1a3       | 0.20631068  | 0.60194175 | 0.51829268 | 1.5121951 |
| A_55_P2106 | 576.4   | Detected | 205.7   | Detected   | 33.6   | Detected   | 118.7  | Detected   | Tcf24         | 0.20593338  | 0.05829285 | 0.57705396 | 0.1633447 |
| A_52_P3455 | 49.1    | Detected | 71      | Detected   | 55.9   | Detected   | 10.1   | Not Detect | Uty           | 0.205702648 | 1.13849287 | 0.14225352 | 0.7873239 |
| A_55_P2033 | 83.7    | Detected | 60.7    | Detected   | 23.3   | Detected   | 17.2   | Not Detect | Ascl2         | 0.205495818 | 0.27837515 | 0.28336079 | 0.383855  |
| A_55_P1958 | 43.4    | Detected | 4.4     | Not Detect | 9.1    | Not Detect | 8.9    | Not Detect | Its1          | 0.205069124 | 0.20967742 | 2.02272727 | 2.0681818 |
| A_51_P3981 | 898.8   | Detected | 1930.1  | Detected   | 3.7    | Not Detect | 183.4  | Detected   | Auts2         | 0.204049844 | 0.0041166  | 0.09502098 | 0.001917  |
| A_55_P2123 | 182.4   | Detected | 42.6    | Detected   | 55.1   | Detected   | 37.2   | Not Detect | Acvr1b        | 0.203947368 | 0.30208333 | 0.87323944 | 1.2934272 |
| A_55_P2039 | 390.4   | Detected | 182.9   | Detected   | 39.5   | Detected   | 79.5   | Detected   | Zfp365        | 0.203637295 | 0.10117828 | 0.43466375 | 0.215965  |
| A_55_P2025 | 67.8    | Detected | 137.4   | Detected   | 3.2    | Not Detect | 13.8   | Not Detect | Arhgap6       | 0.203539823 | 0.04719764 | 0.10043668 | 0.0232897 |
| A_55_P2017 | 222.8   | Detected | 346.4   | Detected   | 18.8   | Detected   | 45.3   | Not Detect | Gm525         | 0.203321364 | 0.08438061 | 0.13077367 | 0.0542725 |
| A_51_P3236 | 48.2    | Detected | 75.9    | Detected   | 15.2   | Not Detect | 9.8    | Not Detect | Vmn1r53       | 0.203319502 | 0.3153527  | 0.12911726 | 0.2002635 |
| A_51_P4063 | 79.6    | Detected | 40.2    | Detected   | 7.2    | Not Detect | 16.1   | Not Detect | Hecw2         | 0.202261307 | 0.09045226 | 0.40049751 | 0.1791045 |
| A_55_P2095 | 149.5   | Detected | 70.7    | Detected   | 58     | Detected   | 30.2   | Not Detect | Kalrn         | 0.202006689 | 0.38795987 | 0.427157   | 0.8203678 |
| A_55_P2048 | 182.5   | Detected | 156.9   | Detected   | 368.8  | Detected   | 36.8   | Not Detect | Hp            | 0.201643836 | 2.02082192 | 0.2345443  | 2.3505417 |
| A_51_P3194 | 651.9   | Detected | 205.5   | Detected   | 99.9   | Detected   | 130.7  | Detected   | Osmr          | 0.200490873 | 0.15324436 | 0.63600973 | 0.4861314 |
| A_55_P2070 | 46.4    | Detected | 3.5     | Not Detect | 3.3    | Not Detect | 9.3    | Not Detect | Ccl27a        | 0.200431034 | 0.07112069 | 2.65714286 | 0.9428571 |
| A_55_P2016 | 2022    | Detected | 450.5   | Detected   | 200.7  | Detected   | 405    | Detected   | Neur1a        | 0.200296736 | 0.09925816 | 0.89900111 | 0.445505  |
| A_51_P3377 | 74.9    | Detected | 97.8    | Detected   | 3.8    | Not Detect | 15     | Not Detect | Pcdhb17       | 0.200267023 | 0.05073431 | 0.15337423 | 0.0388548 |
| A_55_P2151 | 3870.7  | Detected | 2517.4  | Detected   | 1872.3 | Detected   | 773.5  | Detected   | Plxnd1        | 0.199834655 | 0.48371096 | 0.30726146 | 0.7437435 |
| A_52_P2951 | 245.5   | Detected | 17.5    | Detected   | 53.9   | Detected   | 49     | Detected   | Smim5         | 0.199592668 | 0.21955193 | 2.8        | 3.08      |
| A_55_P2164 | 42.2    | Detected | 19.8    | Detected   | 21.8   | Detected   | 8.4    | Not Detect | Zfp872        | 0.199052133 | 0.51658768 | 0.42424242 | 1.1010101 |
| A_55_P2096 | 424.2   | Detected | 3578.4  | Detected   | 22.6   | Detected   | 84.3   | Detected   | Gap43         | 0.198727016 | 0.05327676 | 0.02355801 | 0.0063157 |
| A_51_P1568 | 57.9    | Detected | 34.9    | Detected   | 27.2   | Detected   | 11.5   | Not Detect | Paqr3         | 0.198618307 | 0.46977547 | 0.32951289 | 0.7793696 |
| A_52_P2146 | 1173.7  | Detected | 646.8   | Detected   | 746.3  | Detected   | 232.9  | Detected   | Sox9          | 0.198432308 | 0.63585243 | 0.3600804  | 1.1538343 |
| A_55_P2147 | 9850.8  | Detected | 7273.4  | Detected   | 2521.5 | Detected   | 1944.1 | Detected   | Npcd          | 0.19735453  | 0.25596906 | 0.26728903 | 0.3466742 |
| A_51_P2537 | 43.1    | Detected | 61.2    | Detected   | 6.6    | Not Detect | 8.5    | Not Detect | Il17rd        | 0.197215777 | 0.15313225 | 0.13888889 | 0.1078431 |
| A_51_P3764 | 2348    | Detected | 1779    | Detected   | 1546.3 | Detected   | 462.4  | Detected   | Rhox5         | 0.19693356  | 0.65856048 | 0.2599213  | 0.8691962 |
| A_55_P2252 | 63.7    | Detected | 24.2    | Detected   | 29.1   | Detected   | 12.5   | Not Detect | B230104C14Rik | 0.196232339 | 0.45682889 | 0.51652893 | 1.2024793 |
| A_55_P2129 | 74.8    | Detected | 23.2    | Detected   | 14.3   | Not Detect | 14.6   | Not Detect | Tlr7          | 0.195187166 | 0.19117647 | 0.62931034 | 0.6163793 |
| A_51_P2254 | 534.5   | Detected | 119.2   | Detected   | 387.1  | Detected   | 104.3  | Detected   | 1700016C15Rik | 0.195135641 | 0.72422825 | 0.875      | 3.2474832 |
| A_52_P1788 | 52.4    | Detected | 33.5    | Detected   | 3.7    | Not Detect | 10.2   | Not Detect | Lrp3          | 0.194656489 | 0.07061069 | 0.30447761 | 0.1104478 |
| A_52_P4695 | 2891.7  | Detected | 1162.8  | Detected   | 791.7  | Detected   | 560.4  | Detected   | Cda           | 0.193796037 | 0.27378359 | 0.48194014 | 0.6808566 |

|            |                  |                 |                 |                 |               |             |            |            |           |
|------------|------------------|-----------------|-----------------|-----------------|---------------|-------------|------------|------------|-----------|
| A_66_P1237 | 42.4 Detected    | 25.2 Detected   | 20.3 Detected   | 8.2 Not Detect  | Ulbp1         | 0.193396226 | 0.47877358 | 0.32539683 | 0.8055556 |
| A_51_P4833 | 646.7 Detected   | 968.8 Detected  | 109.4 Detected  | 124.9 Detected  | Ptpn22        | 0.193134375 | 0.16916654 | 0.12892238 | 0.1129232 |
| A_55_P1982 | 166.1 Detected   | 395.8 Detected  | 32.3 Detected   | 32 Not Detect   | Bzrap1        | 0.192655027 | 0.19446117 | 0.08084891 | 0.0816069 |
| A_51_P4366 | 205.1 Detected   | 38.7 Detected   | 350 Detected    | 39.3 Not Detect | Ccl7          | 0.191613847 | 1.70648464 | 1.01550388 | 9.0439276 |
| A_55_P2107 | 270.4 Detected   | 203.9 Detected  | 12.3 Not Detect | 51.6 Detected   | Enah          | 0.190828402 | 0.04548817 | 0.25306523 | 0.0603237 |
| A_51_P4887 | 47.2 Detected    | 14.7 Not Detect | 12.4 Not Detect | 9 Not Detect    | Niacr1        | 0.190677966 | 0.26271186 | 0.6122449  | 0.8435374 |
| A_66_P1395 | 121.6 Detected   | 73.7 Detected   | 207.6 Detected  | 22.9 Not Detect | Igfbp6        | 0.188322368 | 1.70723684 | 0.31071913 | 2.816825  |
| A_55_P2050 | 57.9 Detected    | 52 Detected     | 23 Detected     | 10.9 Not Detect | Ncam1         | 0.188255613 | 0.39723661 | 0.20961538 | 0.4423077 |
| A_55_P2067 | 11129.9 Detected | 2385 Detected   | 5896.3 Detected | 2069.1 Detected | Tspan17       | 0.185904635 | 0.52977116 | 0.86754717 | 2.4722432 |
| A_52_P2166 | 47.5 Detected    | 112.7 Detected  | 3.2 Not Detect  | 8.8 Not Detect  | Klk8          | 0.185263158 | 0.06736842 | 0.07808341 | 0.028394  |
| A_51_P5048 | 49.2 Detected    | 8.8 Not Detect  | 8.7 Not Detect  | 9.1 Not Detect  | Stfa3         | 0.18495935  | 0.17682927 | 1.03409091 | 0.9886364 |
| A_55_P2059 | 15424.1 Detected | 7645 Detected   | 4603.9 Detected | 2849.3 Detected | Col18a1       | 0.184730389 | 0.29848743 | 0.37270111 | 0.6022106 |
| A_55_P2012 | 52.7 Detected    | 77 Detected     | 15.5 Not Detect | 9.7 Not Detect  | Kcnh2         | 0.184060721 | 0.29411765 | 0.12597403 | 0.2012987 |
| A_55_P2059 | 45.1 Detected    | 94.1 Detected   | 66.8 Detected   | 8.3 Not Detect  | Skap1         | 0.184035477 | 1.48115299 | 0.08820404 | 0.7098831 |
| A_55_P2175 | 21637 Detected   | 5785.1 Detected | 434.3 Detected  | 3965.8 Detected | Mgst1         | 0.183287886 | 0.0200721  | 0.6855197  | 0.0750722 |
| A_66_P1216 | 12965.9 Detected | 891.3 Detected  | 5205.9 Detected | 2376.1 Detected | Ablim3        | 0.183257622 | 0.40150703 | 2.6658813  | 5.8407943 |
| A_51_P1293 | 308.3 Detected   | 1507 Detected   | 6.7 Not Detect  | 56.3 Detected   | Pthlh         | 0.182614337 | 0.02173208 | 0.03735899 | 0.0044459 |
| A_55_P2091 | 541.1 Detected   | 729.6 Detected  | 625.4 Detected  | 98.5 Detected   | Arhgap9       | 0.182036592 | 1.15579375 | 0.13500548 | 0.857182  |
| A_55_P2069 | 48.4 Detected    | 5.4 Not Detect  | 4.9 Not Detect  | 8.8 Not Detect  | Olfir874      | 0.181818182 | 0.10123967 | 1.62962963 | 0.9074074 |
| A_55_P2061 | 1464.2 Detected  | 518.5 Detected  | 890.9 Detected  | 264.9 Detected  | Sik1          | 0.180917907 | 0.60845513 | 0.51089682 | 1.7182257 |
| A_55_P2142 | 115.1 Detected   | 80.9 Detected   | 121.4 Detected  | 20.8 Not Detect | Synj2         | 0.180712424 | 1.05473501 | 0.25710754 | 1.500618  |
| A_51_P4000 | 817.2 Detected   | 363.8 Detected  | 329 Detected    | 145.8 Detected  | Kalrn         | 0.178414097 | 0.40259422 | 0.40076965 | 0.904343  |
| A_55_P2011 | 101.8 Detected   | 101.6 Detected  | 10.9 Not Detect | 18.1 Not Detect | Fggy          | 0.177799607 | 0.10707269 | 0.17814961 | 0.1072835 |
| A_55_P2199 | 54.6 Detected    | 56.3 Detected   | 3.5 Not Detect  | 9.7 Not Detect  | Tfap2a        | 0.177655678 | 0.06410256 | 0.1722913  | 0.062167  |
| A_55_P2245 | 56.4 Detected    | 7.9 Not Detect  | 14.2 Not Detect | 10 Not Detect   | Bcas3os2      | 0.177304965 | 0.25177305 | 1.26582278 | 1.7974684 |
| A_52_P5498 | 17482.7 Detected | 4737.2 Detected | 303.5 Detected  | 3098.9 Detected | Mgst1         | 0.177255229 | 0.01736002 | 0.6541628  | 0.0640674 |
| A_55_P1971 | 46.9 Detected    | 36 Detected     | 11.7 Not Detect | 8.3 Not Detect  | Gm10057       | 0.176972281 | 0.24946695 | 0.23055556 | 0.325     |
| A_52_P5354 | 1903.8 Detected  | 958.9 Detected  | 298.1 Detected  | 334.7 Detected  | Gvin1         | 0.175806282 | 0.15658157 | 0.34904578 | 0.310877  |
| A_52_P1691 | 142.3 Detected   | 377.1 Detected  | 3 Not Detect    | 24.7 Not Detect | Auts2         | 0.17357695  | 0.02108222 | 0.06549987 | 0.0079554 |
| A_55_P2019 | 59.5 Detected    | 147.1 Detected  | 4.7 Not Detect  | 10.3 Not Detect | Rasef         | 0.173109244 | 0.0789916  | 0.07002039 | 0.0319511 |
| A_51_P4651 | 765.7 Detected   | 609.1 Detected  | 107.7 Detected  | 132.5 Detected  | Chst15        | 0.173044273 | 0.14065561 | 0.21753407 | 0.1768183 |
| A_55_P1967 | 255.7 Detected   | 136.7 Detected  | 63.7 Detected   | 44.2 Not Detect | Plb1          | 0.172858819 | 0.24912006 | 0.32333577 | 0.4659839 |
| A_55_P1997 | 51.5 Detected    | 121 Detected    | 3.2 Not Detect  | 8.9 Not Detect  | Fam69c        | 0.172815534 | 0.06213592 | 0.07355372 | 0.0264463 |
| A_55_P2164 | 1030.6 Detected  | 356.1 Detected  | 48.4 Detected   | 177.2 Detected  | Tcf24         | 0.171938676 | 0.04696293 | 0.49761303 | 0.1359169 |
| A_55_P1958 | 63.4 Detected    | 32.7 Detected   | 92.4 Detected   | 10.9 Not Detect | 1700016D02Rik | 0.17192429  | 1.45741325 | 0.33333333 | 2.8256881 |
| A_51_P4811 | 20641.8 Detected | 9530 Detected   | 8634.6 Detected | 3548.4 Detected | Cbr3          | 0.171903613 | 0.41830654 | 0.37233998 | 0.9060441 |
| A_51_P1856 | 2842.9 Detected  | 1790.7 Detected | 707.3 Detected  | 487.9 Detected  | Ccl9          | 0.171620528 | 0.24879524 | 0.27246328 | 0.3949852 |
| A_51_P3414 | 1320.9 Detected  | 369.8 Detected  | 93.8 Detected   | 226.5 Detected  | Csf2ra        | 0.171473995 | 0.07101219 | 0.61249324 | 0.2536506 |
| A_55_P2195 | 1533.4 Detected  | 704.6 Detected  | 402.7 Detected  | 261 Detected    | Dbn1          | 0.170209991 | 0.26261902 | 0.37042293 | 0.5715299 |
| A_55_P2155 | 908.8 Detected   | 332 Detected    | 592 Detected    | 154.5 Detected  | BC096441      | 0.170004401 | 0.65140845 | 0.46536145 | 1.7831325 |

|            |         |          |         |            |         |            |        |            |               |             |            |            |           |
|------------|---------|----------|---------|------------|---------|------------|--------|------------|---------------|-------------|------------|------------|-----------|
| A_51_P5108 | 5431.4  | Detected | 2429.9  | Detected   | 4837.7  | Detected   | 922.3  | Detected   | Afp           | 0.169808889 | 0.89069117 | 0.37956294 | 1.990905  |
| A_51_P2203 | 2922.2  | Detected | 2549.3  | Detected   | 1205.3  | Detected   | 495.3  | Detected   | Wisp1         | 0.169495586 | 0.41246321 | 0.19428863 | 0.4727965 |
| A_55_P2260 | 53.8    | Detected | 15.4    | Not Detect | 3.2     | Not Detect | 9.1    | Not Detect | 4930544M13Rik | 0.169144981 | 0.05947955 | 0.59090909 | 0.2077922 |
| A_52_P3024 | 1061.5  | Detected | 474.6   | Detected   | 226.6   | Detected   | 179    | Detected   | Plau          | 0.168629298 | 0.2134715  | 0.37715971 | 0.4774547 |
| A_55_P2035 | 378.3   | Detected | 155.1   | Detected   | 111.5   | Detected   | 63.7   | Detected   | Rps6ka2       | 0.16838488  | 0.29473962 | 0.41070277 | 0.718891  |
| A_52_P1949 | 215.8   | Detected | 179.7   | Detected   | 3.7     | Not Detect | 36.2   | Not Detect | Hoxb7         | 0.167747915 | 0.01714551 | 0.20144686 | 0.0205899 |
| A_55_P2044 | 52.5    | Detected | 18.3    | Detected   | 5.9     | Not Detect | 8.8    | Not Detect | Iglon5        | 0.167619048 | 0.11238095 | 0.48087432 | 0.3224044 |
| A_55_P2002 | 104.5   | Detected | 53.3    | Detected   | 7.1     | Not Detect | 17.5   | Not Detect | Usp17la       | 0.167464115 | 0.06794258 | 0.32833021 | 0.1332083 |
| A_55_P2079 | 198.4   | Detected | 88.4    | Detected   | 48.6    | Detected   | 32.9   | Not Detect | Asap3         | 0.165826613 | 0.24495968 | 0.37217195 | 0.5497738 |
| A_55_P2075 | 170.2   | Detected | 371.7   | Detected   | 33.4    | Detected   | 28.2   | Not Detect | Baalc         | 0.165687427 | 0.19623972 | 0.07586764 | 0.0898574 |
| A_55_P2132 | 1906.1  | Detected | 1588.8  | Detected   | 719     | Detected   | 314.8  | Detected   | Wisp1         | 0.165153979 | 0.37721001 | 0.19813696 | 0.4525428 |
| A_55_P2050 | 227.7   | Detected | 514.3   | Detected   | 24.7    | Detected   | 37.6   | Not Detect | Fetub         | 0.165129556 | 0.10847606 | 0.07310908 | 0.0480264 |
| A_55_P1970 | 224.6   | Detected | 277.9   | Detected   | 7.7     | Not Detect | 37     | Not Detect | Dclk2         | 0.164737311 | 0.03428317 | 0.13314142 | 0.0277078 |
| A_51_P4015 | 63.9    | Detected | 107.7   | Detected   | 9.6     | Not Detect | 10.5   | Not Detect | Tmem213       | 0.164319249 | 0.15023474 | 0.09749304 | 0.0891365 |
| A_66_P1406 | 71.9    | Detected | 35.2    | Detected   | 26.7    | Detected   | 11.8   | Not Detect | Gm6403        | 0.164116829 | 0.3713491  | 0.33522727 | 0.7585227 |
| A_55_P2150 | 67.4    | Detected | 35.9    | Detected   | 23      | Detected   | 11     | Not Detect | Gm4827        | 0.163204748 | 0.34124629 | 0.30640669 | 0.6406685 |
| A_66_P1061 | 54      | Detected | 4.7     | Not Detect | 3.2     | Not Detect | 8.8    | Not Detect | Rhoj          | 0.162962963 | 0.05925926 | 1.87234043 | 0.6808511 |
| A_55_P2283 | 54.1    | Detected | 8.6     | Not Detect | 22.9    | Detected   | 8.8    | Not Detect | A530020G20Rik | 0.162661738 | 0.4232902  | 1.02325581 | 2.6627907 |
| A_51_P2097 | 94.2    | Detected | 18.8    | Detected   | 82.4    | Detected   | 15.3   | Not Detect | Cyp2c44       | 0.162420382 | 0.87473461 | 0.81382979 | 4.3829787 |
| A_51_P2773 | 56433.4 | Detected | 37634.4 | Detected   | 27222.3 | Detected   | 9139.8 | Detected   | Sdpr          | 0.161957281 | 0.48237923 | 0.2428576  | 0.7233356 |
| A_55_P2015 | 205.8   | Detected | 294.3   | Detected   | 3.5     | Not Detect | 33.3   | Not Detect | Zcchc24       | 0.16180758  | 0.0170068  | 0.11314985 | 0.0118926 |
| A_51_P4647 | 63.8    | Detected | 88.6    | Detected   | 49.7    | Detected   | 10.3   | Not Detect | Ccl8          | 0.161442006 | 0.77899687 | 0.11625282 | 0.5609481 |
| A_55_P2008 | 6370.5  | Detected | 1796.6  | Detected   | 840.6   | Detected   | 1024.9 | Detected   | Itrp2         | 0.160882191 | 0.13195197 | 0.57046644 | 0.4678838 |
| A_52_P5170 | 110.3   | Detected | 139.5   | Detected   | 53.8    | Detected   | 17.7   | Not Detect | Il18rap       | 0.160471442 | 0.48776065 | 0.12688172 | 0.3856631 |
| A_55_P2274 | 499.8   | Detected | 228.7   | Detected   | 332.9   | Detected   | 79.7   | Detected   | Wnt7b         | 0.159463786 | 0.66606643 | 0.34849147 | 1.4556187 |
| A_55_P1966 | 394.1   | Detected | 401     | Detected   | 20.7    | Detected   | 62.2   | Detected   | Hoxc6         | 0.157827962 | 0.05252474 | 0.15511222 | 0.0516209 |
| A_55_P2132 | 4940.8  | Detected | 887     | Detected   | 1366.8  | Detected   | 779.4  | Detected   | Slc16a2       | 0.157747733 | 0.27663536 | 0.87869222 | 1.5409245 |
| A_55_P1957 | 176.9   | Detected | 108.1   | Detected   | 279.9   | Detected   | 27.9   | Not Detect | 2310002J15Rik | 0.157716224 | 1.58224986 | 0.25809436 | 2.5892692 |
| A_55_P2146 | 95.2    | Detected | 61.6    | Detected   | 33.4    | Detected   | 15     | Not Detect | Lmx1a         | 0.157563025 | 0.35084034 | 0.24350649 | 0.5422078 |
| A_55_P2222 | 56.6    | Detected | 11.6    | Not Detect | 85      | Detected   | 8.9    | Not Detect | Mylk          | 0.157243816 | 1.50176678 | 0.76724138 | 7.3275862 |
| A_52_P4955 | 64.9    | Detected | 42.5    | Detected   | 9.7     | Not Detect | 10.2   | Not Detect | Zbtb10        | 0.157164869 | 0.14946071 | 0.24       | 0.2282353 |
| A_55_P2023 | 2245.1  | Detected | 440     | Detected   | 159.8   | Detected   | 352.1  | Detected   | Neur1a        | 0.156830431 | 0.07117723 | 0.80022727 | 0.3631818 |
| A_52_P2119 | 84.4    | Detected | 14.2    | Not Detect | 31.2    | Detected   | 13.2   | Not Detect | Ms4a4d        | 0.156398104 | 0.36966825 | 0.92957746 | 2.1971831 |
| A_55_P2081 | 67.8    | Detected | 22.9    | Detected   | 7.2     | Not Detect | 10.6   | Not Detect | Fam89a        | 0.156342183 | 0.10619469 | 0.4628821  | 0.3144105 |
| A_51_P4476 | 151.2   | Detected | 64      | Detected   | 23      | Detected   | 23.5   | Not Detect | Plekhh2       | 0.15542328  | 0.1521164  | 0.3671875  | 0.359375  |
| A_55_P2111 | 409.2   | Detected | 245.7   | Detected   | 152.9   | Detected   | 63.5   | Detected   | Npcd          | 0.155180841 | 0.37365591 | 0.25844526 | 0.6223036 |
| A_52_P5005 | 55.5    | Detected | 58      | Detected   | 18.4    | Detected   | 8.6    | Not Detect | 8430419L09Rik | 0.154954955 | 0.33153153 | 0.14827586 | 0.3172414 |
| A_51_P3812 | 3520.9  | Detected | 9752.4  | Detected   | 1293.7  | Detected   | 545.5  | Detected   | Fxyd5         | 0.154931978 | 0.36743446 | 0.05593495 | 0.1326545 |
| A_52_P6091 | 224.4   | Detected | 149.6   | Detected   | 91.2    | Detected   | 34.7   | Not Detect | Pitpnc1       | 0.154634581 | 0.40641711 | 0.23195187 | 0.6096257 |
| A_55_P2082 | 5126.8  | Detected | 6215.1  | Detected   | 1340.2  | Detected   | 787.9  | Detected   | Ak1           | 0.153682609 | 0.26141063 | 0.12677189 | 0.2156361 |

|            |         |          |        |            |        |            |        |            |               |             |            |            |           |
|------------|---------|----------|--------|------------|--------|------------|--------|------------|---------------|-------------|------------|------------|-----------|
| A_51_P2500 | 1007.7  | Detected | 460.6  | Detected   | 836.6  | Detected   | 154.7  | Detected   | Epas1         | 0.153517912 | 0.8302074  | 0.33586626 | 1.8163265 |
| A_52_P2425 | 137     | Detected | 117.5  | Detected   | 28     | Detected   | 20.9   | Not Detect | Ccdc112       | 0.152554745 | 0.20437956 | 0.17787234 | 0.2382979 |
| A_55_P2039 | 60.7    | Detected | 10.4   | Not Detect | 3.3    | Not Detect | 9.2    | Not Detect | Zfp345        | 0.151565074 | 0.05436573 | 0.88461538 | 0.3173077 |
| A_55_P2158 | 60.2    | Detected | 48.4   | Detected   | 4.3    | Not Detect | 9.1    | Not Detect | Dixdc1        | 0.151162791 | 0.07142857 | 0.18801653 | 0.088843  |
| A_55_P2003 | 59.3    | Detected | 8.8    | Not Detect | 3.2    | Not Detect | 8.9    | Not Detect | Asgr1         | 0.150084317 | 0.0539629  | 1.01136364 | 0.3636364 |
| A_52_P3933 | 56.1    | Detected | 229.6  | Detected   | 33.3   | Detected   | 8.4    | Not Detect | P2rx7         | 0.14973262  | 0.59358289 | 0.03658537 | 0.1450348 |
| A_55_P2092 | 598.4   | Detected | 252.9  | Detected   | 210.7  | Detected   | 89.6   | Detected   | Traf5         | 0.14973262  | 0.35210561 | 0.35429023 | 0.8331356 |
| A_55_P2150 | 539.7   | Detected | 764.9  | Detected   | 357.6  | Detected   | 80.7   | Detected   | Als2cr12      | 0.149527515 | 0.66259033 | 0.10550399 | 0.4675121 |
| A_55_P1980 | 76.5    | Detected | 56.7   | Detected   | 3.7    | Not Detect | 11.4   | Not Detect | Pcbp3         | 0.149019608 | 0.04836601 | 0.2010582  | 0.0652557 |
| A_52_P4316 | 356.5   | Detected | 173.4  | Detected   | 35.5   | Detected   | 52.9   | Detected   | Gm1966        | 0.148387097 | 0.09957924 | 0.30507497 | 0.204729  |
| A_55_P2068 | 76.5    | Detected | 56.4   | Detected   | 15.2   | Not Detect | 11.3   | Not Detect | Bpifb4        | 0.147712418 | 0.19869281 | 0.20035461 | 0.2695035 |
| A_55_P2051 | 306.7   | Detected | 295.4  | Detected   | 90.8   | Detected   | 45.3   | Not Detect | Pr13d2        | 0.147701337 | 0.29605478 | 0.15335139 | 0.3073798 |
| A_51_P5178 | 1364.5  | Detected | 584.5  | Detected   | 584.8  | Detected   | 201.5  | Detected   | Nfatc1        | 0.14767314  | 0.4285819  | 0.34473909 | 1.0005133 |
| A_55_P2113 | 267     | Detected | 307    | Detected   | 340.6  | Detected   | 39.2   | Not Detect | Cyth4         | 0.146816479 | 1.27565543 | 0.1276873  | 1.1094463 |
| A_55_P2142 | 57.3    | Detected | 126.6  | Detected   | 3      | Not Detect | 8.4    | Not Detect | Slc9a7        | 0.146596859 | 0.05235602 | 0.06635071 | 0.0236967 |
| A_55_P2416 | 213.6   | Detected | 61.3   | Detected   | 66     | Detected   | 31.3   | Not Detect | 8430426J06Rik | 0.146535581 | 0.30898876 | 0.51060359 | 1.0766721 |
| A_55_P2013 | 1469.5  | Detected | 243.5  | Detected   | 157.9  | Detected   | 214.7  | Detected   | Gm2016        | 0.146104117 | 0.10745151 | 0.88172485 | 0.64846   |
| A_51_P2392 | 342.4   | Detected | 566.4  | Detected   | 111.4  | Detected   | 50     | Not Detect | Mapk13        | 0.146028037 | 0.32535047 | 0.08827684 | 0.1966808 |
| A_51_P4037 | 63.2    | Detected | 87.9   | Detected   | 3.3    | Not Detect | 9.2    | Not Detect | Sptbn2        | 0.14556962  | 0.05221519 | 0.10466439 | 0.0375427 |
| A_55_P2041 | 274.6   | Detected | 366.4  | Detected   | 6.4    | Not Detect | 39.8   | Not Detect | Six4          | 0.144938092 | 0.02330663 | 0.10862445 | 0.0174672 |
| A_55_P2111 | 11818.2 | Detected | 8997.4 | Detected   | 2596.4 | Detected   | 1712.3 | Detected   | Cp            | 0.1448867   | 0.21969505 | 0.19031053 | 0.2885723 |
| A_51_P4059 | 417     | Detected | 148.4  | Detected   | 63.7   | Detected   | 60.4   | Detected   | Lmcd1         | 0.144844125 | 0.15275779 | 0.40700809 | 0.4292453 |
| A_52_P6035 | 844.9   | Detected | 469.2  | Detected   | 324.3  | Detected   | 122    | Detected   | Greb1l        | 0.144395786 | 0.38383241 | 0.26001705 | 0.6911765 |
| A_55_P2016 | 537.4   | Detected | 1403   | Detected   | 64.8   | Detected   | 77.5   | Detected   | Cxcl10        | 0.144212877 | 0.12058057 | 0.05523877 | 0.0461867 |
| A_51_P2129 | 68.7    | Detected | 25.8   | Detected   | 17.5   | Detected   | 9.9    | Not Detect | Spata9        | 0.144104803 | 0.25473071 | 0.38372093 | 0.6782946 |
| A_55_P2167 | 68.8    | Detected | 3.5    | Not Detect | 3.5    | Not Detect | 9.8    | Not Detect | Nkx6-3        | 0.14244186  | 0.05087209 | 2.8        | 1         |
| A_55_P2061 | 20598.9 | Detected | 2882.4 | Detected   | 1698.4 | Detected   | 2926.4 | Detected   | Chst1         | 0.142065838 | 0.082451   | 1.01526506 | 0.5892312 |
| A_55_P2118 | 8550.6  | Detected | 6154.7 | Detected   | 2835   | Detected   | 1209.4 | Detected   | Tmem121       | 0.141440367 | 0.33155568 | 0.19650024 | 0.4606236 |
| A_51_P2410 | 68      | Detected | 1361.6 | Detected   | 3.5    | Not Detect | 9.6    | Not Detect | Dkk2          | 0.141176471 | 0.05147059 | 0.00705053 | 0.0025705 |
| A_55_P1998 | 8874    | Detected | 6428.6 | Detected   | 2955.9 | Detected   | 1239.7 | Detected   | Tmem121       | 0.139700248 | 0.33309669 | 0.19284137 | 0.4598046 |
| A_55_P2141 | 2888    | Detected | 2353.2 | Detected   | 360.5  | Detected   | 402    | Detected   | Pard6g        | 0.139196676 | 0.12482687 | 0.17083121 | 0.1531956 |
| A_55_P2056 | 924     | Detected | 163.9  | Detected   | 112.4  | Detected   | 128.2  | Detected   | Gm21319       | 0.138744589 | 0.12164502 | 0.78218426 | 0.685784  |
| A_51_P3170 | 950.2   | Detected | 793.5  | Detected   | 9.6    | Not Detect | 131.6  | Detected   | Ccdc109b      | 0.138497158 | 0.01010314 | 0.16584751 | 0.0120983 |
| A_51_P4112 | 170.8   | Detected | 82.9   | Detected   | 47.9   | Detected   | 23.6   | Not Detect | Txndc16       | 0.138173302 | 0.28044496 | 0.28468034 | 0.5778046 |
| A_55_P1983 | 2933.7  | Detected | 240.5  | Detected   | 282.7  | Detected   | 402.5  | Detected   | Gm2022        | 0.137198759 | 0.09636295 | 1.67359667 | 1.1754678 |
| A_55_P1998 | 6954.3  | Detected | 2288.2 | Detected   | 1925.4 | Detected   | 951    | Detected   | Sema3f        | 0.136749925 | 0.27686467 | 0.41561052 | 0.8414474 |
| A_55_P2168 | 4794.7  | Detected | 7355.2 | Detected   | 240.6  | Detected   | 650.5  | Detected   | Rbpm5         | 0.135670636 | 0.05018041 | 0.08844083 | 0.0327116 |
| A_66_P1214 | 379.3   | Detected | 347    | Detected   | 599.7  | Detected   | 51.4   | Detected   | Sardh         | 0.135512787 | 1.58107039 | 0.1481268  | 1.7282421 |
| A_55_P2082 | 1431.2  | Detected | 5018.7 | Detected   | 96.3   | Detected   | 193    | Detected   | Btbd11        | 0.134851873 | 0.06728619 | 0.03845617 | 0.0191882 |
| A_52_P4819 | 4599    | Detected | 1497.8 | Detected   | 29.9   | Detected   | 618.3  | Detected   | Grem1         | 0.13444227  | 0.00650141 | 0.41280545 | 0.0199626 |



|            |                  |                  |                 |                 |               |             |            |            |           |
|------------|------------------|------------------|-----------------|-----------------|---------------|-------------|------------|------------|-----------|
| A_55_P2137 | 70.8 Detected    | 66.2 Detected    | 5 Not Detect    | 9.5 Not Detect  | Chst15        | 0.134180791 | 0.07062147 | 0.14350453 | 0.0755287 |
| A_55_P2080 | 793.3 Detected   | 72.9 Detected    | 84.7 Detected   | 106.3 Detected  | BB287469      | 0.133997227 | 0.10676919 | 1.45816187 | 1.1618656 |
| A_51_P3156 | 3179.7 Detected  | 383.8 Detected   | 354.8 Detected  | 423.5 Detected  | Igf2bp2       | 0.133188666 | 0.11158285 | 1.10343929 | 0.9244398 |
| A_55_P2026 | 966.4 Detected   | 486.9 Detected   | 551.7 Detected  | 128.2 Detected  | Tigit         | 0.132657285 | 0.57088162 | 0.26329842 | 1.1330869 |
| A_55_P2183 | 78.4 Detected    | 187.2 Detected   | 71.2 Detected   | 10.4 Not Detect | P2rx7         | 0.132653061 | 0.90816327 | 0.05555556 | 0.3803419 |
| A_55_P2170 | 1441.6 Detected  | 183.5 Detected   | 158.2 Detected  | 190.2 Detected  | Igf2bp2       | 0.131936737 | 0.10973918 | 1.03651226 | 0.8621253 |
| A_66_P1201 | 472.5 Detected   | 32.7 Detected    | 47.8 Detected   | 61.5 Detected   | Nrep          | 0.13015873  | 0.10116402 | 1.88073394 | 1.4617737 |
| A_55_P1973 | 7210 Detected    | 7001.6 Detected  | 1646.5 Detected | 935 Detected    | Ltbp1         | 0.129680999 | 0.22836338 | 0.1335409  | 0.2351605 |
| A_51_P4744 | 76.4 Detected    | 3.6 Not Detect   | 11.9 Not Detect | 9.9 Not Detect  | Tac4          | 0.129581152 | 0.15575916 | 2.75       | 3.3055556 |
| A_51_P4454 | 64.5 Detected    | 36 Detected      | 67 Detected     | 8.3 Not Detect  | Fut7          | 0.128682171 | 1.03875969 | 0.23055556 | 1.8611111 |
| A_51_P4621 | 75.6 Detected    | 7.8 Not Detect   | 8.9 Not Detect  | 9.7 Not Detect  | Olr1          | 0.128306878 | 0.11772487 | 1.24358974 | 1.1410256 |
| A_55_P2088 | 814 Detected     | 1542.1 Detected  | 603.1 Detected  | 104.4 Detected  | Fhod3         | 0.128255528 | 0.74090909 | 0.06769989 | 0.3910901 |
| A_55_P2055 | 146 Detected     | 36.8 Detected    | 15.5 Not Detect | 18.6 Not Detect | Gm8300        | 0.12739726  | 0.10616438 | 0.50543478 | 0.4211957 |
| A_51_P3974 | 218.1 Detected   | 278.7 Detected   | 3.3 Not Detect  | 27.6 Not Detect | Prss46        | 0.126547455 | 0.01513067 | 0.09903122 | 0.0118407 |
| A_52_P2585 | 70.5 Detected    | 60.3 Detected    | 29.9 Detected   | 8.9 Not Detect  | Slc26a9       | 0.126241135 | 0.42411348 | 0.14759536 | 0.4958541 |
| A_66_P1308 | 355.9 Detected   | 491.5 Detected   | 38.2 Detected   | 44.7 Not Detect | Pcdh18        | 0.125597078 | 0.10733352 | 0.09094608 | 0.0777213 |
| A_55_P2059 | 70.8 Detected    | 56.7 Detected    | 3.2 Not Detect  | 8.8 Not Detect  | Gm5177        | 0.124293785 | 0.04519774 | 0.15520282 | 0.0564374 |
| A_55_P1990 | 53722.7 Detected | 11301.4 Detected | 2593.5 Detected | 6675.9 Detected | Cxcl5         | 0.124265906 | 0.04827568 | 0.59071442 | 0.2294848 |
| A_51_P2042 | 79.7 Detected    | 56.7 Detected    | 33.9 Detected   | 9.9 Not Detect  | Efhb          | 0.124215809 | 0.42534504 | 0.17460317 | 0.5978836 |
| A_52_P4541 | 1449.2 Detected  | 414.1 Detected   | 492.9 Detected  | 179.7 Detected  | Olfml2b       | 0.123999448 | 0.34011869 | 0.43395315 | 1.1902922 |
| A_52_P2447 | 437.2 Detected   | 162.7 Detected   | 73.2 Detected   | 53.9 Detected   | Tcf7          | 0.123284538 | 0.16742909 | 0.33128457 | 0.4499078 |
| A_55_P2087 | 1509.7 Detected  | 188.8 Detected   | 153.2 Detected  | 185.3 Detected  | Gm8300        | 0.122739617 | 0.10147711 | 0.98146186 | 0.8114407 |
| A_51_P1967 | 417.1 Detected   | 20.4 Detected    | 992 Detected    | 51.1 Detected   | Itih2         | 0.122512587 | 2.37832654 | 2.50490196 | 48.627451 |
| A_55_P2164 | 85.4 Detected    | 6.3 Not Detect   | 4.5 Not Detect  | 10.4 Not Detect | Pr17c1        | 0.121779859 | 0.05269321 | 1.65079365 | 0.7142857 |
| A_55_P2220 | 88.9 Detected    | 72.7 Detected    | 7.6 Not Detect  | 10.8 Not Detect | Otud1         | 0.121484814 | 0.08548931 | 0.14855571 | 0.1045392 |
| A_55_P1986 | 227.3 Detected   | 87.8 Detected    | 92 Detected     | 27.5 Not Detect | Rps6ka2       | 0.120985482 | 0.40475143 | 0.31321185 | 1.047836  |
| A_55_P2269 | 76.7 Detected    | 11.8 Not Detect  | 13.8 Not Detect | 9.2 Not Detect  | Fam107a       | 0.119947849 | 0.17992177 | 0.77966102 | 1.1694915 |
| A_55_P2177 | 79.3 Detected    | 20.5 Detected    | 12.1 Not Detect | 9.4 Not Detect  | Lepr          | 0.118537201 | 0.15258512 | 0.45853659 | 0.5902439 |
| A_55_P1973 | 876.5 Detected   | 478.7 Detected   | 556.4 Detected  | 102.8 Detected  | Stra6         | 0.117284655 | 0.63479749 | 0.21474828 | 1.1623146 |
| A_55_P2110 | 184.2 Detected   | 27.2 Detected    | 29.2 Detected   | 21.5 Not Detect | Gpr153        | 0.116720955 | 0.15852334 | 0.79044118 | 1.0735294 |
| A_55_P2031 | 160.3 Detected   | 418.7 Detected   | 23.2 Detected   | 18.6 Not Detect | Igf1          | 0.116032439 | 0.14472863 | 0.04442321 | 0.0554096 |
| A_55_P1989 | 18235.2 Detected | 4474.5 Detected  | 8157.9 Detected | 2109.2 Detected | Slco4a1       | 0.115666403 | 0.44737102 | 0.47138228 | 1.8231981 |
| A_55_P2040 | 10437.4 Detected | 1795.6 Detected  | 294.7 Detected  | 1203.2 Detected | Pmp22         | 0.115277751 | 0.028235   | 0.67008242 | 0.1641234 |
| A_55_P2018 | 77.3 Detected    | 7.6 Not Detect   | 3.2 Not Detect  | 8.9 Not Detect  | Sgip1         | 0.115135834 | 0.04139715 | 1.17105263 | 0.4210526 |
| A_55_P2037 | 82.6 Detected    | 63.2 Detected    | 123.9 Detected  | 9.5 Not Detect  | Atp1a3        | 0.115012107 | 1.5        | 0.15031646 | 1.960443  |
| A_51_P3425 | 696.6 Detected   | 281.1 Detected   | 88.8 Detected   | 79.4 Detected   | Akap12        | 0.113982199 | 0.12747631 | 0.28246176 | 0.3159018 |
| A_51_P1986 | 154.1 Detected   | 29.8 Detected    | 58.2 Detected   | 17.4 Not Detect | Ttc36         | 0.112913692 | 0.37767683 | 0.58389262 | 1.9530201 |
| A_55_P1996 | 1213.1 Detected  | 514.9 Detected   | 119.2 Detected  | 136 Detected    | Cachd1        | 0.112109472 | 0.09826065 | 0.26412896 | 0.2315013 |
| A_55_P2091 | 130.7 Detected   | 86.1 Detected    | 19.1 Detected   | 14.6 Not Detect | Rassf2        | 0.111706197 | 0.14613619 | 0.16957027 | 0.2218351 |
| A_51_P2417 | 79.2 Detected    | 42.6 Detected    | 3.2 Not Detect  | 8.8 Not Detect  | 4930579C12Rik | 0.111111111 | 0.04040404 | 0.20657277 | 0.0751174 |

|            |         |          |         |            |         |            |        |            |               |             |            |            |           |
|------------|---------|----------|---------|------------|---------|------------|--------|------------|---------------|-------------|------------|------------|-----------|
| A_51_P2691 | 86.1    | Detected | 15.1    | Not Detect | 18.1    | Detected   | 9.5    | Not Detect | Mmp19         | 0.110336818 | 0.21022067 | 0.62913907 | 1.1986755 |
| A_55_P2060 | 82      | Detected | 148.9   | Detected   | 8.6     | Not Detect | 8.9    | Not Detect | BC005764      | 0.108536585 | 0.10487805 | 0.05977166 | 0.0577569 |
| A_66_P1065 | 3304.1  | Detected | 216     | Detected   | 253.6   | Detected   | 357.3  | Detected   | Gm2022        | 0.108138374 | 0.07675312 | 1.65416667 | 1.1740741 |
| A_55_P1970 | 568.8   | Detected | 4063.7  | Detected   | 33.2    | Detected   | 61.5   | Detected   | Pknox2        | 0.108122363 | 0.0583685  | 0.01513399 | 0.0081699 |
| A_55_P2035 | 388.1   | Detected | 30769.9 | Detected   | 3.8     | Not Detect | 41.8   | Not Detect | Penk          | 0.1077042   | 0.00979129 | 0.00135847 | 0.0001235 |
| A_55_P1975 | 43933.7 | Detected | 6578.8  | Detected   | 7785.3  | Detected   | 4671.4 | Detected   | Bcl2l15       | 0.106328399 | 0.17720565 | 0.71006871 | 1.1833921 |
| A_51_P4857 | 88.6    | Detected | 18.7    | Detected   | 27.7    | Detected   | 9.4    | Not Detect | Nts           | 0.106094808 | 0.31264108 | 0.5026738  | 1.4812834 |
| A_55_P1978 | 114.6   | Detected | 274.1   | Detected   | 14.6    | Not Detect | 12.1   | Not Detect | Artn          | 0.105584642 | 0.12739965 | 0.04414447 | 0.0532652 |
| A_51_P1150 | 349.4   | Detected | 259     | Detected   | 78.3    | Detected   | 36.8   | Not Detect | Edn1          | 0.105323412 | 0.22409845 | 0.14208494 | 0.3023166 |
| A_51_P4851 | 221.3   | Detected | 173.4   | Detected   | 3.6     | Not Detect | 23.3   | Not Detect | Cplx2         | 0.105286941 | 0.01626751 | 0.1343714  | 0.0207612 |
| A_55_P2169 | 990.4   | Detected | 439.3   | Detected   | 101.1   | Detected   | 104.1  | Detected   | Gm1966        | 0.105109047 | 0.10207997 | 0.2369679  | 0.2301389 |
| A_51_P2556 | 105.2   | Detected | 11.7    | Not Detect | 104.6   | Detected   | 11     | Not Detect | Mmp3          | 0.104562738 | 0.99429658 | 0.94017094 | 8.9401709 |
| A_55_P1964 | 9731.3  | Detected | 10593   | Detected   | 7.3     | Not Detect | 1013.8 | Detected   | Gm1673        | 0.104179298 | 0.00075016 | 0.09570471 | 0.0006891 |
| A_55_P2040 | 33777.8 | Detected | 8995.8  | Detected   | 13452.7 | Detected   | 3495.2 | Detected   | Itga7         | 0.103476248 | 0.39827046 | 0.38853687 | 1.4954423 |
| A_55_P2006 | 81.2    | Detected | 4       | Not Detect | 3       | Not Detect | 8.3    | Not Detect | C130073F10Rik | 0.102216749 | 0.03694581 | 2.075      | 0.75      |
| A_55_P2093 | 10458.4 | Detected | 454.9   | Detected   | 822.7   | Detected   | 1068.8 | Detected   | Gm2016        | 0.102195364 | 0.07866404 | 2.34952737 | 1.8085293 |
| A_55_P2050 | 125.6   | Detected | 34.8    | Detected   | 74.6    | Detected   | 12.8   | Not Detect | Ptpdc1        | 0.101910828 | 0.59394904 | 0.36781609 | 2.1436782 |
| A_55_P1971 | 313.9   | Detected | 15.2    | Not Detect | 7.9     | Not Detect | 31.9   | Not Detect | Serpinh9f     | 0.101624721 | 0.02516725 | 2.09868421 | 0.5197368 |
| A_55_P1996 | 3444.2  | Detected | 1636.6  | Detected   | 322.4   | Detected   | 347    | Detected   | Gvin1         | 0.100749085 | 0.09360664 | 0.21202493 | 0.1969938 |
| A_55_P2093 | 93.1    | Detected | 12.6    | Not Detect | 7.6     | Not Detect | 9.3    | Not Detect | Meig1         | 0.099892589 | 0.08163265 | 0.73809524 | 0.6031746 |
| A_55_P2130 | 155.1   | Detected | 188.3   | Detected   | 3.3     | Not Detect | 15.4   | Not Detect | Runx3         | 0.09929078  | 0.0212766  | 0.08178439 | 0.0175252 |
| A_51_P3486 | 216.6   | Detected | 646.9   | Detected   | 81.9    | Detected   | 21.5   | Not Detect | Ramp1         | 0.099261311 | 0.37811634 | 0.03323543 | 0.1266038 |
| A_55_P2279 | 96.5    | Detected | 80.8    | Detected   | 100.6   | Detected   | 9.4    | Not Detect | 2810404M03Rik | 0.097409326 | 1.04248705 | 0.11633663 | 1.2450495 |
| A_52_P1144 | 92.4    | Detected | 5.3     | Not Detect | 10.7    | Not Detect | 9      | Not Detect | Rab6b         | 0.097402597 | 0.11580087 | 1.69811321 | 2.0188679 |
| A_55_P2043 | 248.9   | Detected | 72.7    | Detected   | 12.6    | Not Detect | 24.2   | Not Detect | Fam89a        | 0.097227802 | 0.05062274 | 0.33287483 | 0.173315  |
| A_51_P2548 | 11557   | Detected | 12182.2 | Detected   | 645.8   | Detected   | 1117.5 | Detected   | Ptgs2         | 0.096694644 | 0.05587955 | 0.0917322  | 0.0530118 |
| A_55_P2094 | 111.6   | Detected | 66.9    | Detected   | 32.2    | Detected   | 10.5   | Not Detect | Ly75          | 0.094086022 | 0.28853047 | 0.15695067 | 0.4813154 |
| A_55_P1953 | 3186.3  | Detected | 3808.2  | Detected   | 1248.9  | Detected   | 297.7  | Detected   | Atp6v0a4      | 0.093431253 | 0.39195933 | 0.07817342 | 0.3279502 |
| A_55_P2002 | 181.2   | Detected | 289.5   | Detected   | 5.9     | Not Detect | 16.9   | Not Detect | Zcchc24       | 0.093267108 | 0.03256071 | 0.05837651 | 0.02038   |
| A_66_P1028 | 97.7    | Detected | 192.5   | Detected   | 3.3     | Not Detect | 9.1    | Not Detect | Ccbe1         | 0.093142272 | 0.03377687 | 0.04727273 | 0.0171429 |
| A_65_P1605 | 106.6   | Detected | 8       | Not Detect | 12.5    | Not Detect | 9.9    | Not Detect | Tgfb3         | 0.092870544 | 0.11726079 | 1.2375     | 1.5625    |
| A_51_P1955 | 16316.5 | Detected | 6983.8  | Detected   | 3514.9  | Detected   | 1513.6 | Detected   | Csf1          | 0.092764992 | 0.21541997 | 0.21673015 | 0.5032933 |
| A_55_P2030 | 469.8   | Detected | 525.3   | Detected   | 17.7    | Not Detect | 43.4   | Not Detect | Scmh1         | 0.092379736 | 0.03767561 | 0.08261946 | 0.033695  |
| A_55_P2096 | 677     | Detected | 1349    | Detected   | 28      | Detected   | 62.5   | Detected   | Steap3        | 0.092319055 | 0.04135894 | 0.04633062 | 0.0207561 |
| A_51_P3023 | 280.4   | Detected | 434.6   | Detected   | 110.1   | Detected   | 25.8   | Not Detect | Fgfbp1        | 0.092011412 | 0.39265335 | 0.05936493 | 0.2533364 |
| A_55_P2163 | 1100.3  | Detected | 844.1   | Detected   | 3.6     | Not Detect | 101.2  | Detected   | Hoxb13        | 0.091974916 | 0.00327183 | 0.11989101 | 0.0042649 |
| A_55_P2046 | 105.7   | Detected | 79.1    | Detected   | 120     | Detected   | 9.7    | Not Detect | Duoxa1        | 0.091769158 | 1.13528855 | 0.12262958 | 1.517067  |
| A_55_P2160 | 1433.4  | Detected | 420.7   | Detected   | 171.7   | Detected   | 129.5  | Detected   | Plscr2        | 0.090344635 | 0.11978513 | 0.3078203  | 0.4081293 |
| A_51_P2754 | 4055.5  | Detected | 526.7   | Detected   | 5031.3  | Detected   | 363.7  | Detected   | 2310007B03Rik | 0.089680681 | 1.24061152 | 0.69052592 | 9.5524967 |
| A_52_P8197 | 93.5    | Detected | 39.5    | Detected   | 19.1    | Detected   | 8.3    | Not Detect | Slc17a6       | 0.088770053 | 0.20427807 | 0.21012658 | 0.4835443 |

|            |          |          |         |            |         |            |         |            |               |             |            |            |           |
|------------|----------|----------|---------|------------|---------|------------|---------|------------|---------------|-------------|------------|------------|-----------|
| A_55_P2013 | 224.7    | Detected | 46.5    | Detected   | 23.2    | Detected   | 19.9    | Not Detect | Islr2         | 0.088562528 | 0.10324878 | 0.42795699 | 0.4989247 |
| A_55_P2076 | 221.8    | Detected | 138.4   | Detected   | 25.9    | Detected   | 19.6    | Not Detect | Mdfi          | 0.088367899 | 0.11677187 | 0.1416185  | 0.1871387 |
| A_66_P1077 | 1649.6   | Detected | 554.8   | Detected   | 268.4   | Detected   | 145.6   | Detected   | Smox          | 0.088263822 | 0.16270611 | 0.26243691 | 0.4837779 |
| A_55_P2066 | 4572.7   | Detected | 2487.4  | Detected   | 3.1     | Not Detect | 401.1   | Detected   | Enah          | 0.087716229 | 0.00067794 | 0.16125271 | 0.0012463 |
| A_55_P1962 | 327.2    | Detected | 73      | Detected   | 462.7   | Detected   | 28.2    | Not Detect | Afap112       | 0.086185819 | 1.4141198  | 0.38630137 | 6.3383562 |
| A_51_P1455 | 106.9    | Detected | 10.9    | Not Detect | 3.3     | Not Detect | 9.2     | Not Detect | Pr12a1        | 0.08606174  | 0.03086997 | 0.8440367  | 0.3027523 |
| A_51_P1551 | 1064.9   | Detected | 685.5   | Detected   | 132     | Detected   | 91      | Detected   | Abtb2         | 0.085454033 | 0.1239553  | 0.13274982 | 0.1925602 |
| A_51_P1968 | 131.1    | Detected | 24.7    | Detected   | 52.7    | Detected   | 11.2    | Not Detect | Amdhd1        | 0.085430969 | 0.40198322 | 0.4534413  | 2.1336032 |
| A_55_P1956 | 4878.6   | Detected | 1176    | Detected   | 16.9    | Not Detect | 410.6   | Detected   | Rab38         | 0.08416349  | 0.00346411 | 0.34914966 | 0.0143707 |
| A_55_P2032 | 691.5    | Detected | 257.1   | Detected   | 2487.9  | Detected   | 56.2    | Detected   | Habp2         | 0.081272596 | 3.5978308  | 0.21859199 | 9.6767795 |
| A_55_P2143 | 885      | Detected | 174.3   | Detected   | 292.2   | Detected   | 71.9    | Detected   | Ugt1a6b       | 0.081242938 | 0.33016949 | 0.41250717 | 1.67642   |
| A_55_P2085 | 170.3    | Detected | 452.2   | Detected   | 8       | Not Detect | 13.8    | Not Detect | Igf1          | 0.08103347  | 0.04697592 | 0.03051747 | 0.0176913 |
| A_52_P2827 | 513.6    | Detected | 72.7    | Detected   | 47.9    | Detected   | 41.5    | Not Detect | Sdc3          | 0.080802181 | 0.09326324 | 0.57083906 | 0.6588721 |
| A_55_P2183 | 33413.4  | Detected | 19985.8 | Detected   | 269.1   | Detected   | 2699.3  | Detected   | Cldn3         | 0.080784955 | 0.00805366 | 0.13506089 | 0.0134646 |
| A_55_P1962 | 112.9    | Detected | 170.1   | Detected   | 3.3     | Not Detect | 9.1     | Not Detect | Zic2          | 0.080602303 | 0.02922941 | 0.05349794 | 0.0194004 |
| A_55_P2001 | 3346.9   | Detected | 1686.7  | Detected   | 79.4    | Detected   | 268.7   | Detected   | Zfp503        | 0.080283247 | 0.02372345 | 0.15930515 | 0.0470742 |
| A_55_P2027 | 118.3    | Detected | 38.8    | Detected   | 3.4     | Not Detect | 9.4     | Not Detect | Rgs3          | 0.079459003 | 0.02874049 | 0.24226804 | 0.0876289 |
| A_55_P2414 | 117.7    | Detected | 57.2    | Detected   | 44.1    | Detected   | 9.2     | Not Detect | 1110002E22Rik | 0.078164826 | 0.37468139 | 0.16083916 | 0.770979  |
| A_52_P5188 | 723      | Detected | 288     | Detected   | 47.6    | Detected   | 56.2    | Detected   | Mmd           | 0.077731674 | 0.06583679 | 0.19513889 | 0.1652778 |
| A_52_P3084 | 136.5    | Detected | 38.8    | Detected   | 3.8     | Not Detect | 10.5    | Not Detect | Plxnb1        | 0.076923077 | 0.02783883 | 0.27061856 | 0.0979381 |
| A_55_P1975 | 2510.6   | Detected | 348.9   | Detected   | 409.7   | Detected   | 192.4   | Detected   | Bcl2l15       | 0.076635067 | 0.16318808 | 0.55144741 | 1.174262  |
| A_55_P2003 | 738.1    | Detected | 1232.8  | Detected   | 59.2    | Detected   | 56.1    | Detected   | Nrcam         | 0.076005961 | 0.08020593 | 0.04550616 | 0.0480208 |
| A_55_P2004 | 246504.9 | Detected | 18818.1 | Detected   | 7519.8  | Detected   | 18464.6 | Detected   | Pr12c5        | 0.07490561  | 0.03050568 | 0.98121489 | 0.3996046 |
| A_55_P2167 | 122.3    | Detected | 5.6     | Not Detect | 3.2     | Not Detect | 9.1     | Not Detect | Gm6093        | 0.074407195 | 0.02616517 | 1.625      | 0.5714286 |
| A_55_P2053 | 232.8    | Detected | 108.3   | Detected   | 227.6   | Detected   | 17.2    | Not Detect | Epas1         | 0.073883162 | 0.97766323 | 0.1588181  | 2.1015697 |
| A_51_P3376 | 129.1    | Detected | 41.1    | Detected   | 40.7    | Detected   | 9.5     | Not Detect | Cd53          | 0.073586367 | 0.31525949 | 0.23114355 | 0.9902676 |
| A_51_P2252 | 34822.2  | Detected | 28021.5 | Detected   | 14305.5 | Detected   | 2556.8  | Detected   | Htra1         | 0.073424425 | 0.41081551 | 0.09124422 | 0.5105187 |
| A_55_P1998 | 538.1    | Detected | 19.3    | Detected   | 2011.4  | Detected   | 39.2    | Not Detect | S100a9        | 0.072848913 | 3.73796692 | 2.03108808 | 104.21762 |
| A_51_P2867 | 13912.7  | Detected | 4331.8  | Detected   | 6642.3  | Detected   | 992.2   | Detected   | Ccl2          | 0.071316136 | 0.4774271  | 0.22905028 | 1.533381  |
| A_51_P2492 | 426      | Detected | 7281.5  | Detected   | 11.5    | Not Detect | 30.3    | Not Detect | Rgs16         | 0.071126761 | 0.02699531 | 0.00416123 | 0.0015793 |
| A_55_P2077 | 1206     | Detected | 618.9   | Detected   | 91.9    | Detected   | 85.5    | Detected   | Sod3          | 0.070895522 | 0.07620232 | 0.13814833 | 0.1484893 |
| A_55_P1998 | 5671.3   | Detected | 1755.1  | Detected   | 829.3   | Detected   | 397.6   | Detected   | Smox          | 0.070107383 | 0.1462275  | 0.2265398  | 0.4725087 |
| A_65_P0131 | 144      | Detected | 180.7   | Detected   | 5.2     | Not Detect | 10      | Not Detect | Pde4b         | 0.069444444 | 0.03611111 | 0.05534034 | 0.028777  |
| A_66_P1042 | 135.1    | Detected | 8.7     | Not Detect | 11.6    | Not Detect | 9.2     | Not Detect | 1700112E06Rik | 0.068097705 | 0.08586232 | 1.05747126 | 1.3333333 |
| A_55_P2095 | 147.9    | Detected | 61.6    | Detected   | 78.1    | Detected   | 10      | Not Detect | Kalrn         | 0.067613252 | 0.5280595  | 0.16233766 | 1.2678571 |
| A_51_P2568 | 3790     | Detected | 209.4   | Detected   | 290     | Detected   | 254.2   | Detected   | S100a8        | 0.06707124  | 0.07651715 | 1.2139446  | 1.3849093 |
| A_52_P6192 | 203089.5 | Detected | 14110.1 | Detected   | 5631.6  | Detected   | 13478.5 | Detected   | Pr12c5        | 0.066367291 | 0.02772965 | 0.95523774 | 0.3991184 |
| A_51_P4407 | 8437     | Detected | 4641.6  | Detected   | 906.4   | Detected   | 552.4   | Detected   | Celsr1        | 0.06547351  | 0.10743155 | 0.11901069 | 0.1952775 |
| A_55_P2017 | 2352.3   | Detected | 1143.2  | Detected   | 752.4   | Detected   | 153.9   | Detected   | Csf1          | 0.065425328 | 0.31985716 | 0.13462211 | 0.6581526 |
| A_55_P2362 | 432.1    | Detected | 225.5   | Detected   | 100.6   | Detected   | 28      | Not Detect | 4930471E19Rik | 0.064799815 | 0.23281648 | 0.12416851 | 0.4461197 |

|            |                   |                 |                 |                             |             |            |            |           |
|------------|-------------------|-----------------|-----------------|-----------------------------|-------------|------------|------------|-----------|
| A_66_P1279 | 152.2 Detected    | 331.1 Detected  | 3.5 Not Detect  | 9.8 Not Detect Bcat1        | 0.064388962 | 0.02299606 | 0.02959831 | 0.0105708 |
| A_51_P2575 | 9491.2 Detected   | 1474.3 Detected | 892.2 Detected  | 606.2 Detected Marcks11     | 0.06386969  | 0.09400287 | 0.41117819 | 0.6051686 |
| A_55_P2319 | 638.8 Detected    | 277.5 Detected  | 19.1 Detected   | 40.5 Not Detect AW011956    | 0.063400125 | 0.02989981 | 0.14594595 | 0.0688288 |
| A_52_P1254 | 156.5 Detected    | 75.5 Detected   | 7.3 Not Detect  | 9.9 Not Detect Slc25a48     | 0.063258786 | 0.04664537 | 0.13112583 | 0.0966887 |
| A_51_P1266 | 4014.6 Detected   | 1843.7 Detected | 87.7 Detected   | 253.6 Detected Zfp503       | 0.063169432 | 0.02184526 | 0.13754949 | 0.0475674 |
| A_55_P2394 | 5216.9 Detected   | 1045.2 Detected | 165.2 Detected  | 320 Detected Fst            | 0.061339109 | 0.03166632 | 0.3061615  | 0.1580559 |
| A_52_P3047 | 145.1 Detected    | 76.8 Detected   | 3.2 Not Detect  | 8.9 Not Detect Cr1f1        | 0.061337009 | 0.02205376 | 0.11588542 | 0.0416667 |
| A_55_P2169 | 2552.2 Detected   | 1245.4 Detected | 810.2 Detected  | 155.5 Detected Csf1         | 0.060927827 | 0.31745161 | 0.12485948 | 0.650554  |
| A_55_P2017 | 149.5 Detected    | 69.4 Detected   | 47.7 Detected   | 9.1 Not Detect Lamc3        | 0.060869565 | 0.31906355 | 0.13112392 | 0.6873199 |
| A_52_P5325 | 153.2 Detected    | 17.6 Detected   | 37.9 Detected   | 9.3 Not Detect Thrb         | 0.060704961 | 0.24738903 | 0.52840909 | 2.1534091 |
| A_55_P2030 | 179 Detected      | 93.5 Detected   | 139.7 Detected  | 10.8 Not Detect Eda         | 0.060335196 | 0.78044693 | 0.11550802 | 1.4941176 |
| A_55_P2000 | 156.5 Detected    | 14.9 Not Detect | 5 Not Detect    | 9.4 Not Detect Axin2        | 0.060063898 | 0.03194888 | 0.63087248 | 0.3355705 |
| A_55_P1971 | 359.6 Detected    | 12.3 Not Detect | 3.3 Not Detect  | 20.7 Not Detect Serpinb9e   | 0.05756396  | 0.00917686 | 1.68292683 | 0.2682927 |
| A_51_P1574 | 179.8 Detected    | 19.5 Detected   | 45.5 Detected   | 10.3 Not Detect Rgn         | 0.057285873 | 0.25305895 | 0.52820513 | 2.3333333 |
| A_52_P4957 | 168.3 Detected    | 6.6 Not Detect  | 3.4 Not Detect  | 9.6 Not Detect Kcnmb3       | 0.057040998 | 0.02020202 | 1.45454545 | 0.5151515 |
| A_52_P2575 | 12535.7 Detected  | 2038.4 Detected | 4808 Detected   | 704.1 Detected Igfbp4       | 0.056167585 | 0.3835446  | 0.34541797 | 2.3587127 |
| A_55_P2141 | 6793.7 Detected   | 3470.5 Detected | 359.8 Detected  | 378.2 Detected Eya2         | 0.055669223 | 0.05296083 | 0.10897565 | 0.1036738 |
| A_52_P2854 | 162.5 Detected    | 1255.3 Detected | 566.6 Detected  | 9 Not Detect Lrp2           | 0.055384615 | 3.48676923 | 0.0071696  | 0.4513662 |
| A_55_P2084 | 193.4 Detected    | 50 Detected     | 50.6 Detected   | 10.5 Not Detect Nid1        | 0.054291624 | 0.26163392 | 0.21       | 1.012     |
| A_51_P4728 | 7912.5 Detected   | 3074.8 Detected | 1815.8 Detected | 423.9 Detected Aif11        | 0.05357346  | 0.22948499 | 0.13786263 | 0.5905425 |
| A_52_P2480 | 395 Detected      | 163.8 Detected  | 3 Not Detect    | 21 Not Detect Chsy3         | 0.053164557 | 0.00759494 | 0.12820513 | 0.018315  |
| A_55_P2019 | 192.5 Detected    | 896 Detected    | 3.7 Not Detect  | 10.1 Not Detect Adra1d      | 0.052467532 | 0.01922078 | 0.01127232 | 0.0041295 |
| A_51_P2117 | 187.1 Detected    | 749.7 Detected  | 7 Not Detect    | 9.7 Not Detect Chst13       | 0.051843934 | 0.03741315 | 0.01293851 | 0.0093371 |
| A_52_P2057 | 599.2 Detected    | 197.2 Detected  | 136.6 Detected  | 30.4 Not Detect Vgll4       | 0.050734312 | 0.22797063 | 0.15415822 | 0.6926978 |
| A_51_P2680 | 203.9 Detected    | 302 Detected    | 3.7 Not Detect  | 10.3 Not Detect Six1        | 0.050514958 | 0.01814615 | 0.03410596 | 0.0122517 |
| A_66_P1071 | 850.6 Detected    | 373.7 Detected  | 98.6 Detected   | 42.8 Detected 3300005D01Rik | 0.050317423 | 0.11591818 | 0.11453037 | 0.263848  |
| A_51_P2387 | 182.8 Detected    | 51 Detected     | 3.2 Not Detect  | 9.1 Not Detect Cd93         | 0.049781182 | 0.01750547 | 0.17843137 | 0.0627451 |
| A_66_P1191 | 177.4 Detected    | 156.6 Detected  | 5.4 Not Detect  | 8.8 Not Detect Zfp354c      | 0.049605411 | 0.03043968 | 0.05619413 | 0.0344828 |
| A_52_P5672 | 1995.3 Detected   | 147.4 Detected  | 28.9 Detected   | 95.8 Detected Ppef1         | 0.04801283  | 0.01448404 | 0.64993216 | 0.1960651 |
| A_55_P2003 | 591.4 Detected    | 139.5 Detected  | 53.2 Detected   | 28.3 Not Detect Asgr1       | 0.047852553 | 0.08995604 | 0.20286738 | 0.381362  |
| A_55_P2162 | 201.2 Detected    | 537.6 Detected  | 4.9 Not Detect  | 9.6 Not Detect Kctd15       | 0.047713718 | 0.02435388 | 0.01785714 | 0.0091146 |
| A_55_P2183 | 124061.7 Detected | 6526.6 Detected | 2526.3 Detected | 5875.6 Detected Prl2c1      | 0.047360305 | 0.02036325 | 0.90025434 | 0.3870775 |
| A_55_P2092 | 344.3 Detected    | 600.4 Detected  | 17.2 Detected   | 16.3 Not Detect Emp2        | 0.047342434 | 0.04995643 | 0.02714857 | 0.0286476 |
| A_55_P2027 | 231 Detected      | 180.5 Detected  | 13.1 Not Detect | 10.9 Not Detect Il1rl1      | 0.047186147 | 0.05670996 | 0.06038781 | 0.0725762 |
| A_55_P2023 | 222.9 Detected    | 89 Detected     | 12 Not Detect   | 10.3 Not Detect Prg4        | 0.046209062 | 0.0538358  | 0.11573034 | 0.1348315 |
| A_55_P2082 | 195 Detected      | 3.1 Not Detect  | 3.2 Not Detect  | 8.8 Not Detect Lingo2       | 0.045128205 | 0.01641026 | 2.83870968 | 1.0322581 |
| A_51_P1103 | 1470.1 Detected   | 317.2 Detected  | 750.9 Detected  | 64.5 Detected C3            | 0.043874566 | 0.51078158 | 0.20334174 | 2.3672762 |
| A_55_P2052 | 3349.6 Detected   | 1945.2 Detected | 123 Detected    | 140.8 Detected Cr1f1        | 0.04203487  | 0.0367208  | 0.0723833  | 0.0632326 |
| A_55_P2140 | 199.9 Detected    | 412.4 Detected  | 3 Not Detect    | 8.3 Not Detect Qpct         | 0.04152076  | 0.0150075  | 0.02012609 | 0.0072745 |
| A_55_P1987 | 287.2 Detected    | 22.6 Detected   | 22.2 Detected   | 11.8 Not Detect Gpr115      | 0.041086351 | 0.07729805 | 0.52212389 | 0.9823009 |

|            |          |          |         |            |         |            |        |            |               |             |            |            |           |
|------------|----------|----------|---------|------------|---------|------------|--------|------------|---------------|-------------|------------|------------|-----------|
| A_55_P1985 | 7981.8   | Detected | 9620    | Detected   | 5.7     | Not Detect | 327.3  | Detected   | Nrg1          | 0.041005788 | 0.00071412 | 0.03402287 | 0.0005925 |
| A_51_P4258 | 206.4    | Detected | 100     | Detected   | 67.1    | Detected   | 8.4    | Not Detect | Ulbp1         | 0.040697674 | 0.3250969  | 0.084      | 0.671     |
| A_51_P2064 | 211.6    | Detected | 125.1   | Detected   | 3.1     | Not Detect | 8.6    | Not Detect | Lce1i         | 0.040642722 | 0.01465028 | 0.068745   | 0.0247802 |
| A_55_P2057 | 250.3    | Detected | 288.8   | Detected   | 10.4    | Not Detect | 10.1   | Not Detect | Fgfr1         | 0.040351578 | 0.04155014 | 0.0349723  | 0.0360111 |
| A_51_P3397 | 239.4    | Detected | 250.2   | Detected   | 3.4     | Not Detect | 9.6    | Not Detect | Il1rl1        | 0.040100251 | 0.01420217 | 0.0383693  | 0.0135891 |
| A_66_P1383 | 442.3    | Detected | 28      | Detected   | 248.5   | Detected   | 16.8   | Not Detect | Acox2         | 0.037983269 | 0.56183586 | 0.6        | 8.875     |
| A_51_P3631 | 4086.2   | Detected | 1360.9  | Detected   | 543.3   | Detected   | 151.2  | Detected   | Cxcl1         | 0.037002594 | 0.13295972 | 0.11110295 | 0.3992211 |
| A_51_P5129 | 478.7    | Detected | 143.4   | Detected   | 12      | Not Detect | 17.6   | Not Detect | Entpd3        | 0.036766242 | 0.02506789 | 0.12273361 | 0.083682  |
| A_55_P1992 | 257.5    | Detected | 243.1   | Detected   | 3.3     | Not Detect | 9.4    | Not Detect | Ddr2          | 0.036504854 | 0.01281553 | 0.03866722 | 0.0135747 |
| A_51_P4309 | 1120.7   | Detected | 458.4   | Detected   | 77.2    | Detected   | 39     | Not Detect | Fam20a        | 0.034799679 | 0.06888552 | 0.08507853 | 0.1684119 |
| A_55_P2163 | 3437.4   | Detected | 33.3    | Detected   | 110.4   | Detected   | 115.6  | Detected   | Rspo3         | 0.033630069 | 0.0321173  | 3.47147147 | 3.3153153 |
| A_51_P2677 | 1507.8   | Detected | 1245.5  | Detected   | 3.3     | Not Detect | 49.2   | Detected   | Ddr2          | 0.032630322 | 0.00218862 | 0.03950221 | 0.0026495 |
| A_55_P2046 | 146364.7 | Detected | 86985   | Detected   | 33156.4 | Detected   | 4763.9 | Detected   | Sparc         | 0.032548149 | 0.22653276 | 0.05476691 | 0.3811738 |
| A_66_P1190 | 5442.6   | Detected | 4409.2  | Detected   | 1013.9  | Detected   | 174.1  | Detected   | Pla2g7        | 0.031988388 | 0.18628964 | 0.03948562 | 0.229951  |
| A_51_P4051 | 423.4    | Detected | 221.9   | Detected   | 3.8     | Not Detect | 13.1   | Not Detect | Maf           | 0.030940009 | 0.00897496 | 0.0590356  | 0.0171248 |
| A_66_P1147 | 724.4    | Detected | 598.2   | Detected   | 198.8   | Detected   | 22     | Not Detect | Pla2g7        | 0.030369961 | 0.27443401 | 0.036777   | 0.3323303 |
| A_51_P4130 | 4734.1   | Detected | 525.9   | Detected   | 2824.2  | Detected   | 141.7  | Detected   | Mcpt8         | 0.029931772 | 0.59656535 | 0.26944286 | 5.3702225 |
| A_55_P1954 | 3304.4   | Detected | 5388.2  | Detected   | 155.5   | Detected   | 98.2   | Detected   | Prickle1      | 0.029717952 | 0.04705847 | 0.01822501 | 0.0288594 |
| A_55_P2000 | 14704.4  | Detected | 4370.4  | Detected   | 3.4     | Not Detect | 426    | Detected   | Mvb12b        | 0.02897092  | 0.00023122 | 0.09747392 | 0.000778  |
| A_55_P2082 | 1380.8   | Detected | 671.2   | Detected   | 88.3    | Detected   | 39.8   | Not Detect | 5430435G22Rik | 0.02882387  | 0.06394844 | 0.05929678 | 0.1315554 |
| A_51_P2127 | 311.2    | Detected | 552.9   | Detected   | 8.5     | Not Detect | 8.9    | Not Detect | Tgfb1         | 0.028598972 | 0.02731362 | 0.01609694 | 0.0153735 |
| A_55_P1997 | 353.3    | Detected | 21.7    | Detected   | 23.1    | Detected   | 10     | Not Detect | Il6           | 0.028304557 | 0.06538353 | 0.46082949 | 1.0645161 |
| A_51_P2039 | 557.3    | Detected | 93.1    | Detected   | 33.5    | Detected   | 15.4   | Not Detect | Gbp2          | 0.027633232 | 0.06011125 | 0.16541353 | 0.3598281 |
| A_51_P3830 | 497.3    | Detected | 17.5    | Detected   | 6.4     | Not Detect | 12.9   | Not Detect | Clec4d        | 0.025940076 | 0.0128695  | 0.73714286 | 0.3657143 |
| A_55_P2046 | 4009.9   | Detected | 2240.2  | Detected   | 677.4   | Detected   | 103.3  | Detected   | Sparc         | 0.025761241 | 0.16893189 | 0.04611195 | 0.3023837 |
| A_51_P2751 | 1428.5   | Detected | 2102    | Detected   | 363.3   | Detected   | 36.5   | Not Detect | Chst11        | 0.025551278 | 0.25432272 | 0.01736441 | 0.1728354 |
| A_55_P2023 | 4899.5   | Detected | 539.3   | Detected   | 135.3   | Detected   | 119.9  | Detected   | Grhl3         | 0.024471885 | 0.02761506 | 0.22232524 | 0.2508808 |
| A_55_P1964 | 1542     | Detected | 1432.2  | Detected   | 11.6    | Not Detect | 37.7   | Not Detect | Tfap2a        | 0.024448768 | 0.0075227  | 0.02632314 | 0.0080994 |
| A_51_P2174 | 416.4    | Detected | 17.6    | Detected   | 7.7     | Not Detect | 9.5    | Not Detect | Cxcl2         | 0.022814601 | 0.01849183 | 0.53977273 | 0.4375    |
| A_52_P5286 | 9608.1   | Detected | 904.7   | Detected   | 4743.1  | Detected   | 213.3  | Detected   | Hhex          | 0.022200019 | 0.49365639 | 0.23576876 | 5.2427324 |
| A_55_P2079 | 431.2    | Detected | 784.3   | Detected   | 3.5     | Not Detect | 8.9    | Not Detect | Bcat1         | 0.020640074 | 0.00811688 | 0.0113477  | 0.0044626 |
| A_51_P1737 | 3266.2   | Detected | 475.3   | Detected   | 644.3   | Detected   | 63.5   | Detected   | Gprc5b        | 0.019441553 | 0.19726287 | 0.13359983 | 1.3555649 |
| A_52_P3621 | 26052.2  | Detected | 23770.7 | Detected   | 24      | Detected   | 494.2  | Detected   | Fam3c         | 0.018969607 | 0.00092123 | 0.0207903  | 0.0010096 |
| A_51_P2571 | 1068.8   | Detected | 105.7   | Detected   | 143.1   | Detected   | 19.9   | Not Detect | Krt76         | 0.018619012 | 0.13388847 | 0.18826868 | 1.3538316 |
| A_55_P1971 | 456.7    | Detected | 11.7    | Not Detect | 3.1     | Not Detect | 8.5    | Not Detect | Serp1nb9g     | 0.01861178  | 0.00678783 | 0.72649573 | 0.2649573 |
| A_51_P1126 | 765.8    | Detected | 719.8   | Detected   | 111.8   | Detected   | 14.2   | Not Detect | St6galnac2    | 0.0185427   | 0.14599112 | 0.0197277  | 0.1553209 |
| A_55_P2037 | 1170.9   | Detected | 83.6    | Detected   | 113.6   | Detected   | 20.3   | Not Detect | 2610305D13Rik | 0.017337091 | 0.09701939 | 0.24282297 | 1.3588517 |
| A_51_P1169 | 2687.4   | Detected | 673.7   | Detected   | 691.5   | Detected   | 45.4   | Not Detect | Rapgef3       | 0.016893652 | 0.2573119  | 0.06738905 | 1.0264213 |
| A_51_P2574 | 592.6    | Detected | 38.6    | Detected   | 3.6     | Not Detect | 10     | Not Detect | Lhx2          | 0.016874789 | 0.00607492 | 0.25906736 | 0.0932642 |
| A_51_P1570 | 559.2    | Detected | 863.7   | Detected   | 3.3     | Not Detect | 9.2    | Not Detect | Gas1          | 0.016452074 | 0.00590129 | 0.01065185 | 0.0038208 |

|            |         |          |         |            |        |            |       |            |         |             |            |            |           |
|------------|---------|----------|---------|------------|--------|------------|-------|------------|---------|-------------|------------|------------|-----------|
| A_52_P8201 | 690.5   | Detected | 20.6    | Detected   | 45.5   | Detected   | 11.1  | Not Detect | Cxcl15  | 0.016075308 | 0.06589428 | 0.53883495 | 2.2087379 |
| A_55_P2137 | 2400.8  | Detected | 292.6   | Detected   | 728    | Detected   | 36.6  | Not Detect | Gprc5b  | 0.015244918 | 0.30323226 | 0.12508544 | 2.4880383 |
| A_52_P2783 | 574     | Detected | 22.1    | Detected   | 7.7    | Not Detect | 8.5   | Not Detect | Bmp7    | 0.014808362 | 0.01341463 | 0.38461538 | 0.3484163 |
| A_51_P1650 | 681.2   | Detected | 192.3   | Detected   | 50.2   | Detected   | 9.8   | Not Detect | Snai1   | 0.014386377 | 0.07369348 | 0.05096204 | 0.2610504 |
| A_55_P1979 | 640.7   | Detected | 18.3    | Detected   | 13.9   | Not Detect | 9.2   | Not Detect | Sprr2g  | 0.014359295 | 0.02169502 | 0.50273224 | 0.7595628 |
| A_55_P2114 | 742     | Detected | 470.4   | Detected   | 10     | Not Detect | 9.9   | Not Detect | Cadm1   | 0.013342318 | 0.01347709 | 0.02104592 | 0.0212585 |
| A_52_P2328 | 9527.8  | Detected | 1187.3  | Detected   | 222.2  | Detected   | 115.8 | Detected   | Cxcl3   | 0.012153908 | 0.02332123 | 0.09753222 | 0.1871473 |
| A_52_P5322 | 754.4   | Detected | 919.4   | Detected   | 3.3    | Not Detect | 9.1   | Not Detect | S1pr1   | 0.012062566 | 0.00437434 | 0.00989776 | 0.0035893 |
| A_55_P1977 | 3862.7  | Detected | 5729    | Detected   | 3.2    | Not Detect | 46.3  | Detected   | Cck     | 0.011986434 | 0.00082844 | 0.00808169 | 0.0005586 |
| A_51_P2796 | 751.2   | Detected | 13.3    | Not Detect | 5      | Not Detect | 9     | Not Detect | Cyp1a1  | 0.011980831 | 0.00665602 | 0.67669173 | 0.3759398 |
| A_52_P5089 | 807.2   | Detected | 60.9    | Detected   | 96.4   | Detected   | 9.5   | Not Detect | Igf2bp3 | 0.011769078 | 0.11942517 | 0.15599343 | 1.5829228 |
| A_51_P3054 | 2729.1  | Detected | 6320.2  | Detected   | 3.3    | Not Detect | 31.9  | Not Detect | Rcn1    | 0.011688835 | 0.00120919 | 0.00504731 | 0.0005221 |
| A_51_P4072 | 3005.7  | Detected | 299.4   | Detected   | 1863.7 | Detected   | 34.5  | Not Detect | Antxr1  | 0.011478191 | 0.62005523 | 0.11523046 | 6.2247829 |
| A_51_P1721 | 6015.5  | Detected | 350.7   | Detected   | 2706.5 | Detected   | 68.9  | Detected   | Hal     | 0.011453744 | 0.44992104 | 0.19646421 | 7.7174223 |
| A_52_P3908 | 791.3   | Detected | 1419    | Detected   | 3.2    | Not Detect | 9     | Not Detect | Ccbe1   | 0.011373689 | 0.00404398 | 0.00634249 | 0.0022551 |
| A_55_P2000 | 970.5   | Detected | 527.4   | Detected   | 17.2   | Not Detect | 10.3  | Not Detect | Spink2  | 0.010613086 | 0.01772282 | 0.01952977 | 0.0326128 |
| A_55_P1960 | 1026.5  | Detected | 2186    | Detected   | 3.7    | Not Detect | 10.2  | Not Detect | Bcat1   | 0.009936678 | 0.00360448 | 0.00466606 | 0.0016926 |
| A_52_P4767 | 1086.9  | Detected | 3386.1  | Detected   | 79.3   | Detected   | 10.6  | Not Detect | Ubash3b | 0.009752507 | 0.07295979 | 0.00313045 | 0.0234193 |
| A_55_P2167 | 1123.3  | Detected | 368     | Detected   | 3.4    | Not Detect | 9.6   | Not Detect | Mmd     | 0.008546248 | 0.0030268  | 0.02608696 | 0.0092391 |
| A_51_P4029 | 1311.2  | Detected | 2550.3  | Detected   | 904.2  | Detected   | 10.2  | Not Detect | Ddx3y   | 0.007779134 | 0.68959732 | 0.00399953 | 0.3545465 |
| A_55_P2043 | 1414.4  | Detected | 84.8    | Detected   | 3.8    | Not Detect | 10.5  | Not Detect | Hmga2   | 0.007423643 | 0.00268665 | 0.12382075 | 0.0448113 |
| A_55_P2126 | 1298.2  | Detected | 10.5    | Not Detect | 49.9   | Detected   | 9.4   | Not Detect | Lgr5    | 0.007240795 | 0.03843784 | 0.8952381  | 4.752381  |
| A_55_P2139 | 1575.8  | Detected | 777.1   | Detected   | 17.8   | Not Detect | 10.2  | Not Detect | Fgf13   | 0.006472903 | 0.01129585 | 0.01312572 | 0.0229057 |
| A_55_P2093 | 1652    | Detected | 468.2   | Detected   | 3.8    | Not Detect | 10.4  | Not Detect | Mmd     | 0.0062954   | 0.00230024 | 0.02221273 | 0.0081162 |
| A_52_P3007 | 5935.6  | Detected | 330.6   | Detected   | 13.5   | Not Detect | 36.9  | Not Detect | Hmga2   | 0.006216726 | 0.00227441 | 0.11161525 | 0.0408348 |
| A_52_P2530 | 1583.8  | Detected | 186.6   | Detected   | 3.4    | Not Detect | 9.5   | Not Detect | Syt13   | 0.005998232 | 0.00214674 | 0.05091104 | 0.0182208 |
| A_52_P1750 | 1624.9  | Detected | 652.5   | Detected   | 3.2    | Not Detect | 9     | Not Detect | Cachd1  | 0.005538802 | 0.00196935 | 0.0137931  | 0.0049042 |
| A_51_P4283 | 1939.8  | Detected | 250.9   | Detected   | 15.3   | Not Detect | 10.5  | Not Detect | Pbbp    | 0.005412929 | 0.00788741 | 0.04184934 | 0.0609805 |
| A_55_P2101 | 5108.3  | Detected | 1653.5  | Detected   | 90.3   | Detected   | 26    | Not Detect | Ramp3   | 0.005089756 | 0.01767711 | 0.01572422 | 0.0546114 |
| A_51_P1242 | 1964.8  | Detected | 2042.4  | Detected   | 3.6    | Not Detect | 10    | Not Detect | Col4a1  | 0.005089577 | 0.00183225 | 0.0048962  | 0.0017626 |
| A_52_P6768 | 2213.9  | Detected | 1965.1  | Detected   | 3.6    | Not Detect | 10    | Not Detect | Bnc1    | 0.004516916 | 0.00162609 | 0.0050888  | 0.001832  |
| A_52_P2034 | 2446.3  | Detected | 43.8    | Detected   | 34.5   | Detected   | 10.3  | Not Detect | U90926  | 0.00421044  | 0.01410293 | 0.23515982 | 0.7876712 |
| A_52_P4723 | 33927.8 | Detected | 428.9   | Detected   | 874.6  | Detected   | 130.8 | Detected   | Slpi    | 0.003855246 | 0.02577827 | 0.30496619 | 2.03917   |
| A_51_P4372 | 2965.2  | Detected | 4081.4  | Detected   | 8.8    | Not Detect | 10.4  | Not Detect | Emp2    | 0.003507352 | 0.00296776 | 0.00254815 | 0.0021561 |
| A_51_P3596 | 40650.6 | Detected | 3781.7  | Detected   | 4000.8 | Detected   | 134.9 | Detected   | Itgb7   | 0.003318524 | 0.09841921 | 0.03567179 | 1.0579369 |
| A_55_P2028 | 3058.2  | Detected | 2611    | Detected   | 37.7   | Detected   | 10    | Not Detect | Stac    | 0.003269897 | 0.01232751 | 0.00382995 | 0.0144389 |
| A_55_P1954 | 5062.4  | Detected | 1609.1  | Detected   | 112.6  | Detected   | 15.5  | Not Detect | Ramp3   | 0.003061789 | 0.02224241 | 0.00963271 | 0.069977  |
| A_55_P2011 | 3234.3  | Detected | 5312.4  | Detected   | 2250.3 | Detected   | 9.2   | Not Detect | Eif2s3y | 0.00284451  | 0.69576106 | 0.0017318  | 0.4235939 |
| A_51_P4146 | 5840.9  | Detected | 3911.6  | Detected   | 3.4    | Not Detect | 13.7  | Not Detect | Col5a1  | 0.002345529 | 0.0005821  | 0.0035024  | 0.0008692 |
| A_51_P4259 | 15704   | Detected | 20559.1 | Detected   | 3.4    | Not Detect | 21.4  | Not Detect | Khdrbs3 | 0.00136271  | 0.00021651 | 0.0010409  | 0.0001654 |
